# Supplementary material for: microRNA profiling in the Weddell Seal suggests novel regulatory mechanisms contributing to diving adaptation
Source: bioRxiv or medRxiv preprint supplement (doi:10.1101/851394), 2019-11-29
Supplement: Supplementary file [file media-2.pdf]

## Total vs Genome matching reads

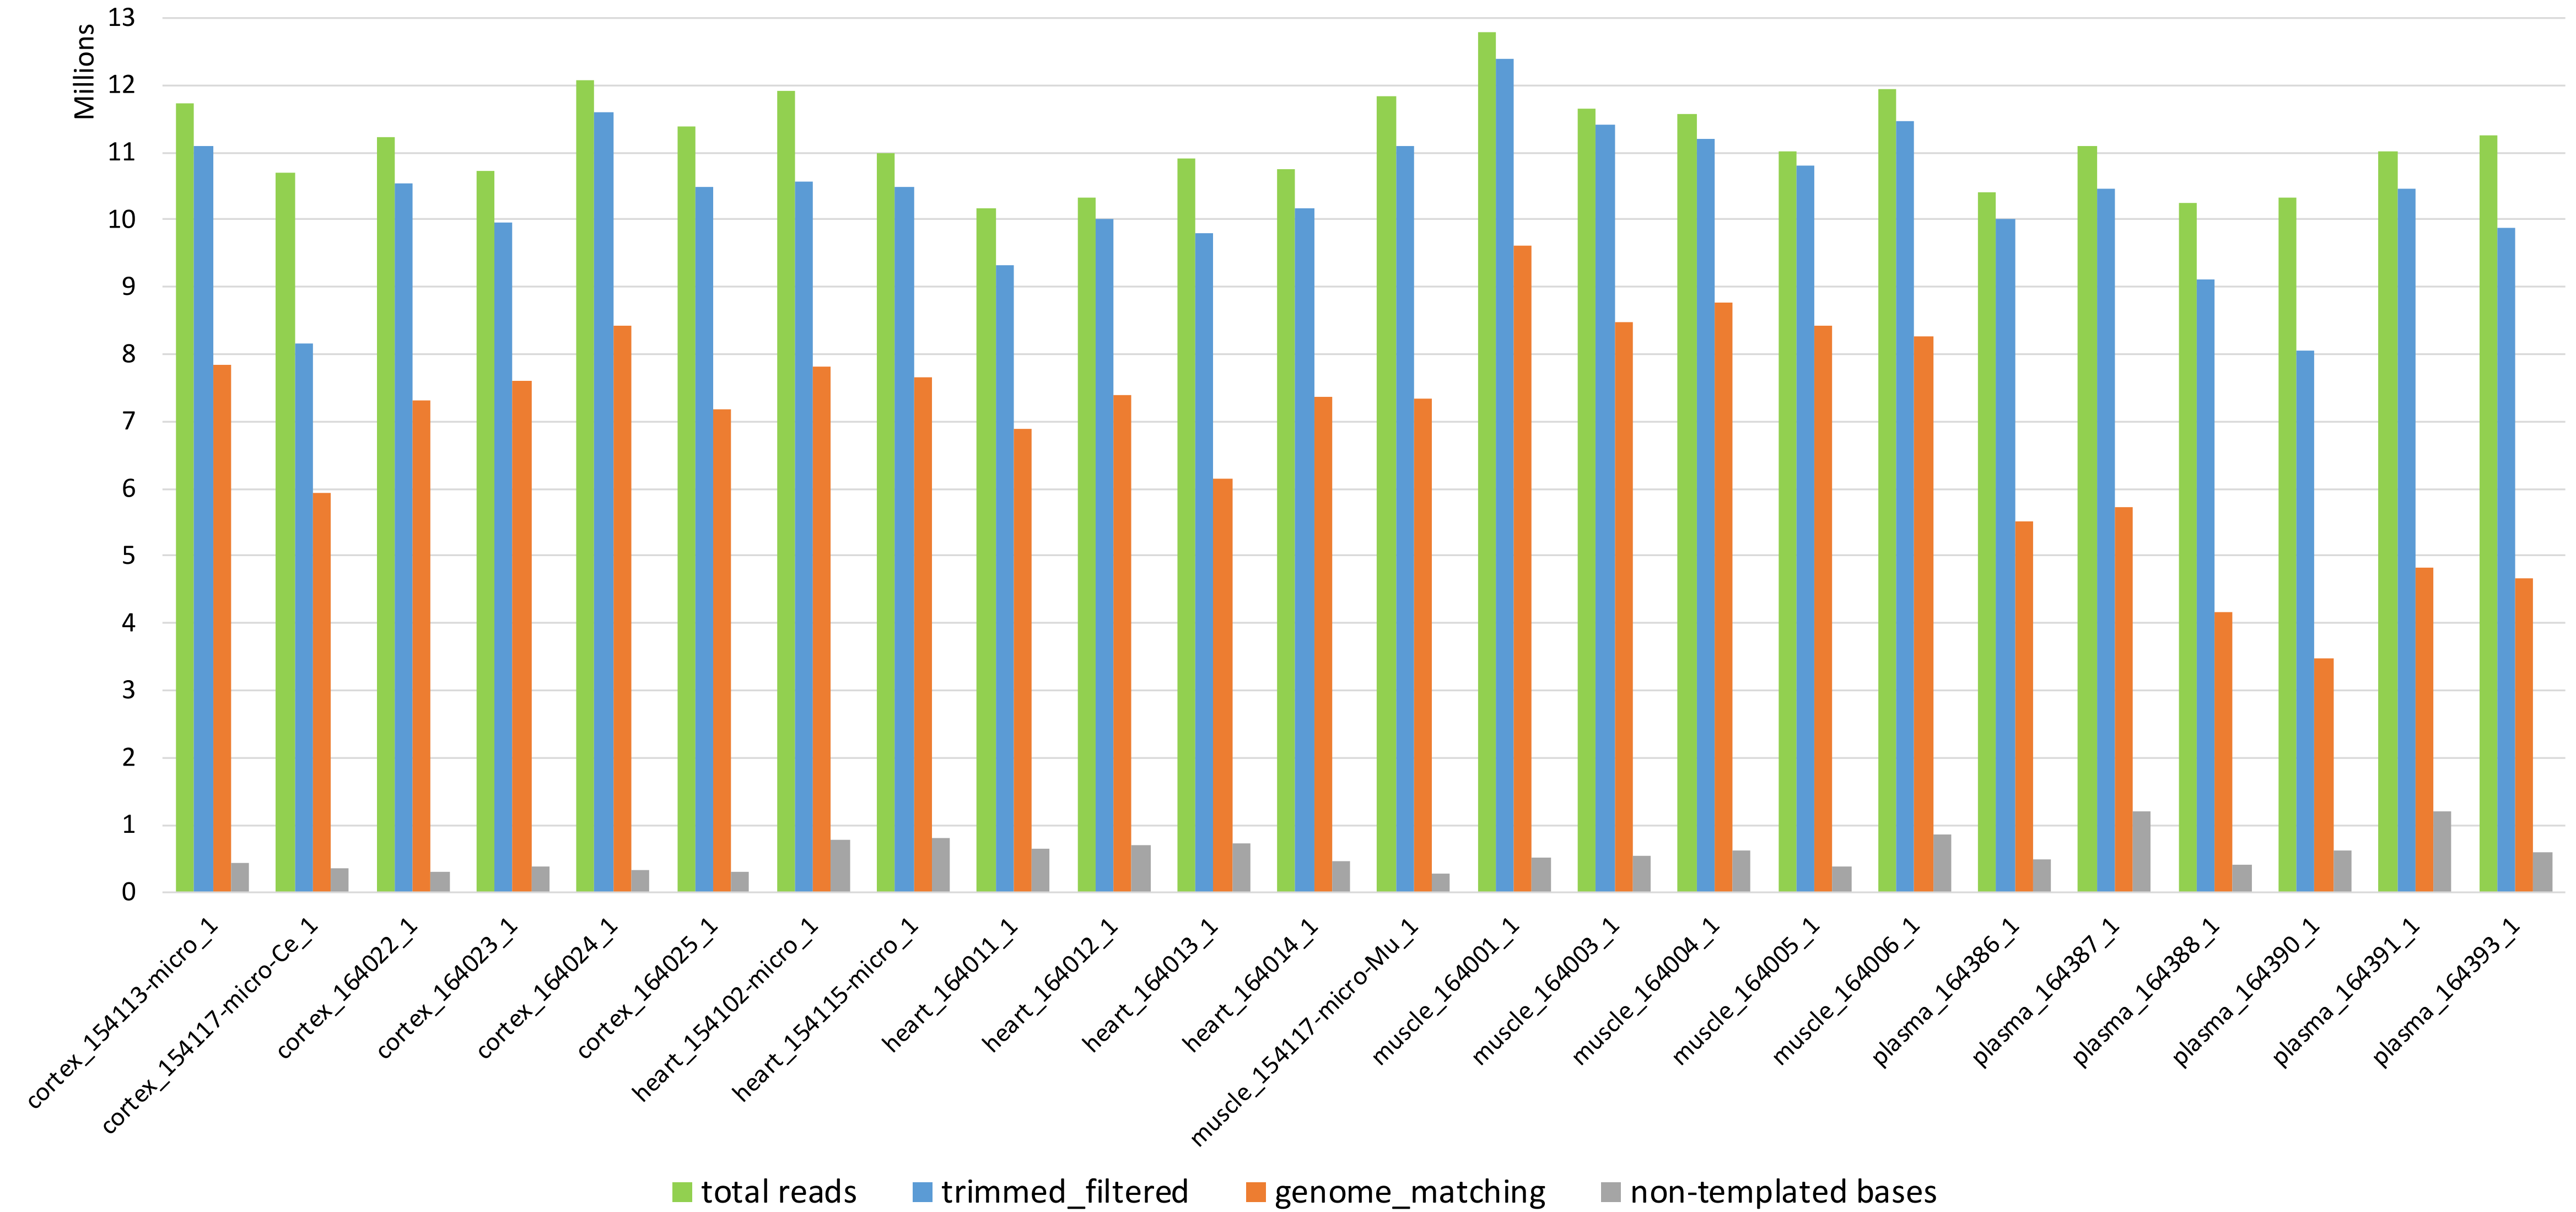

Supplementary Figure S1. Read statistics considering different stages of the bioinformatic analysis: number of raw adapter trimmed reads, number of trimmed reads with a perfect match to the genome.

# Mapping statistics

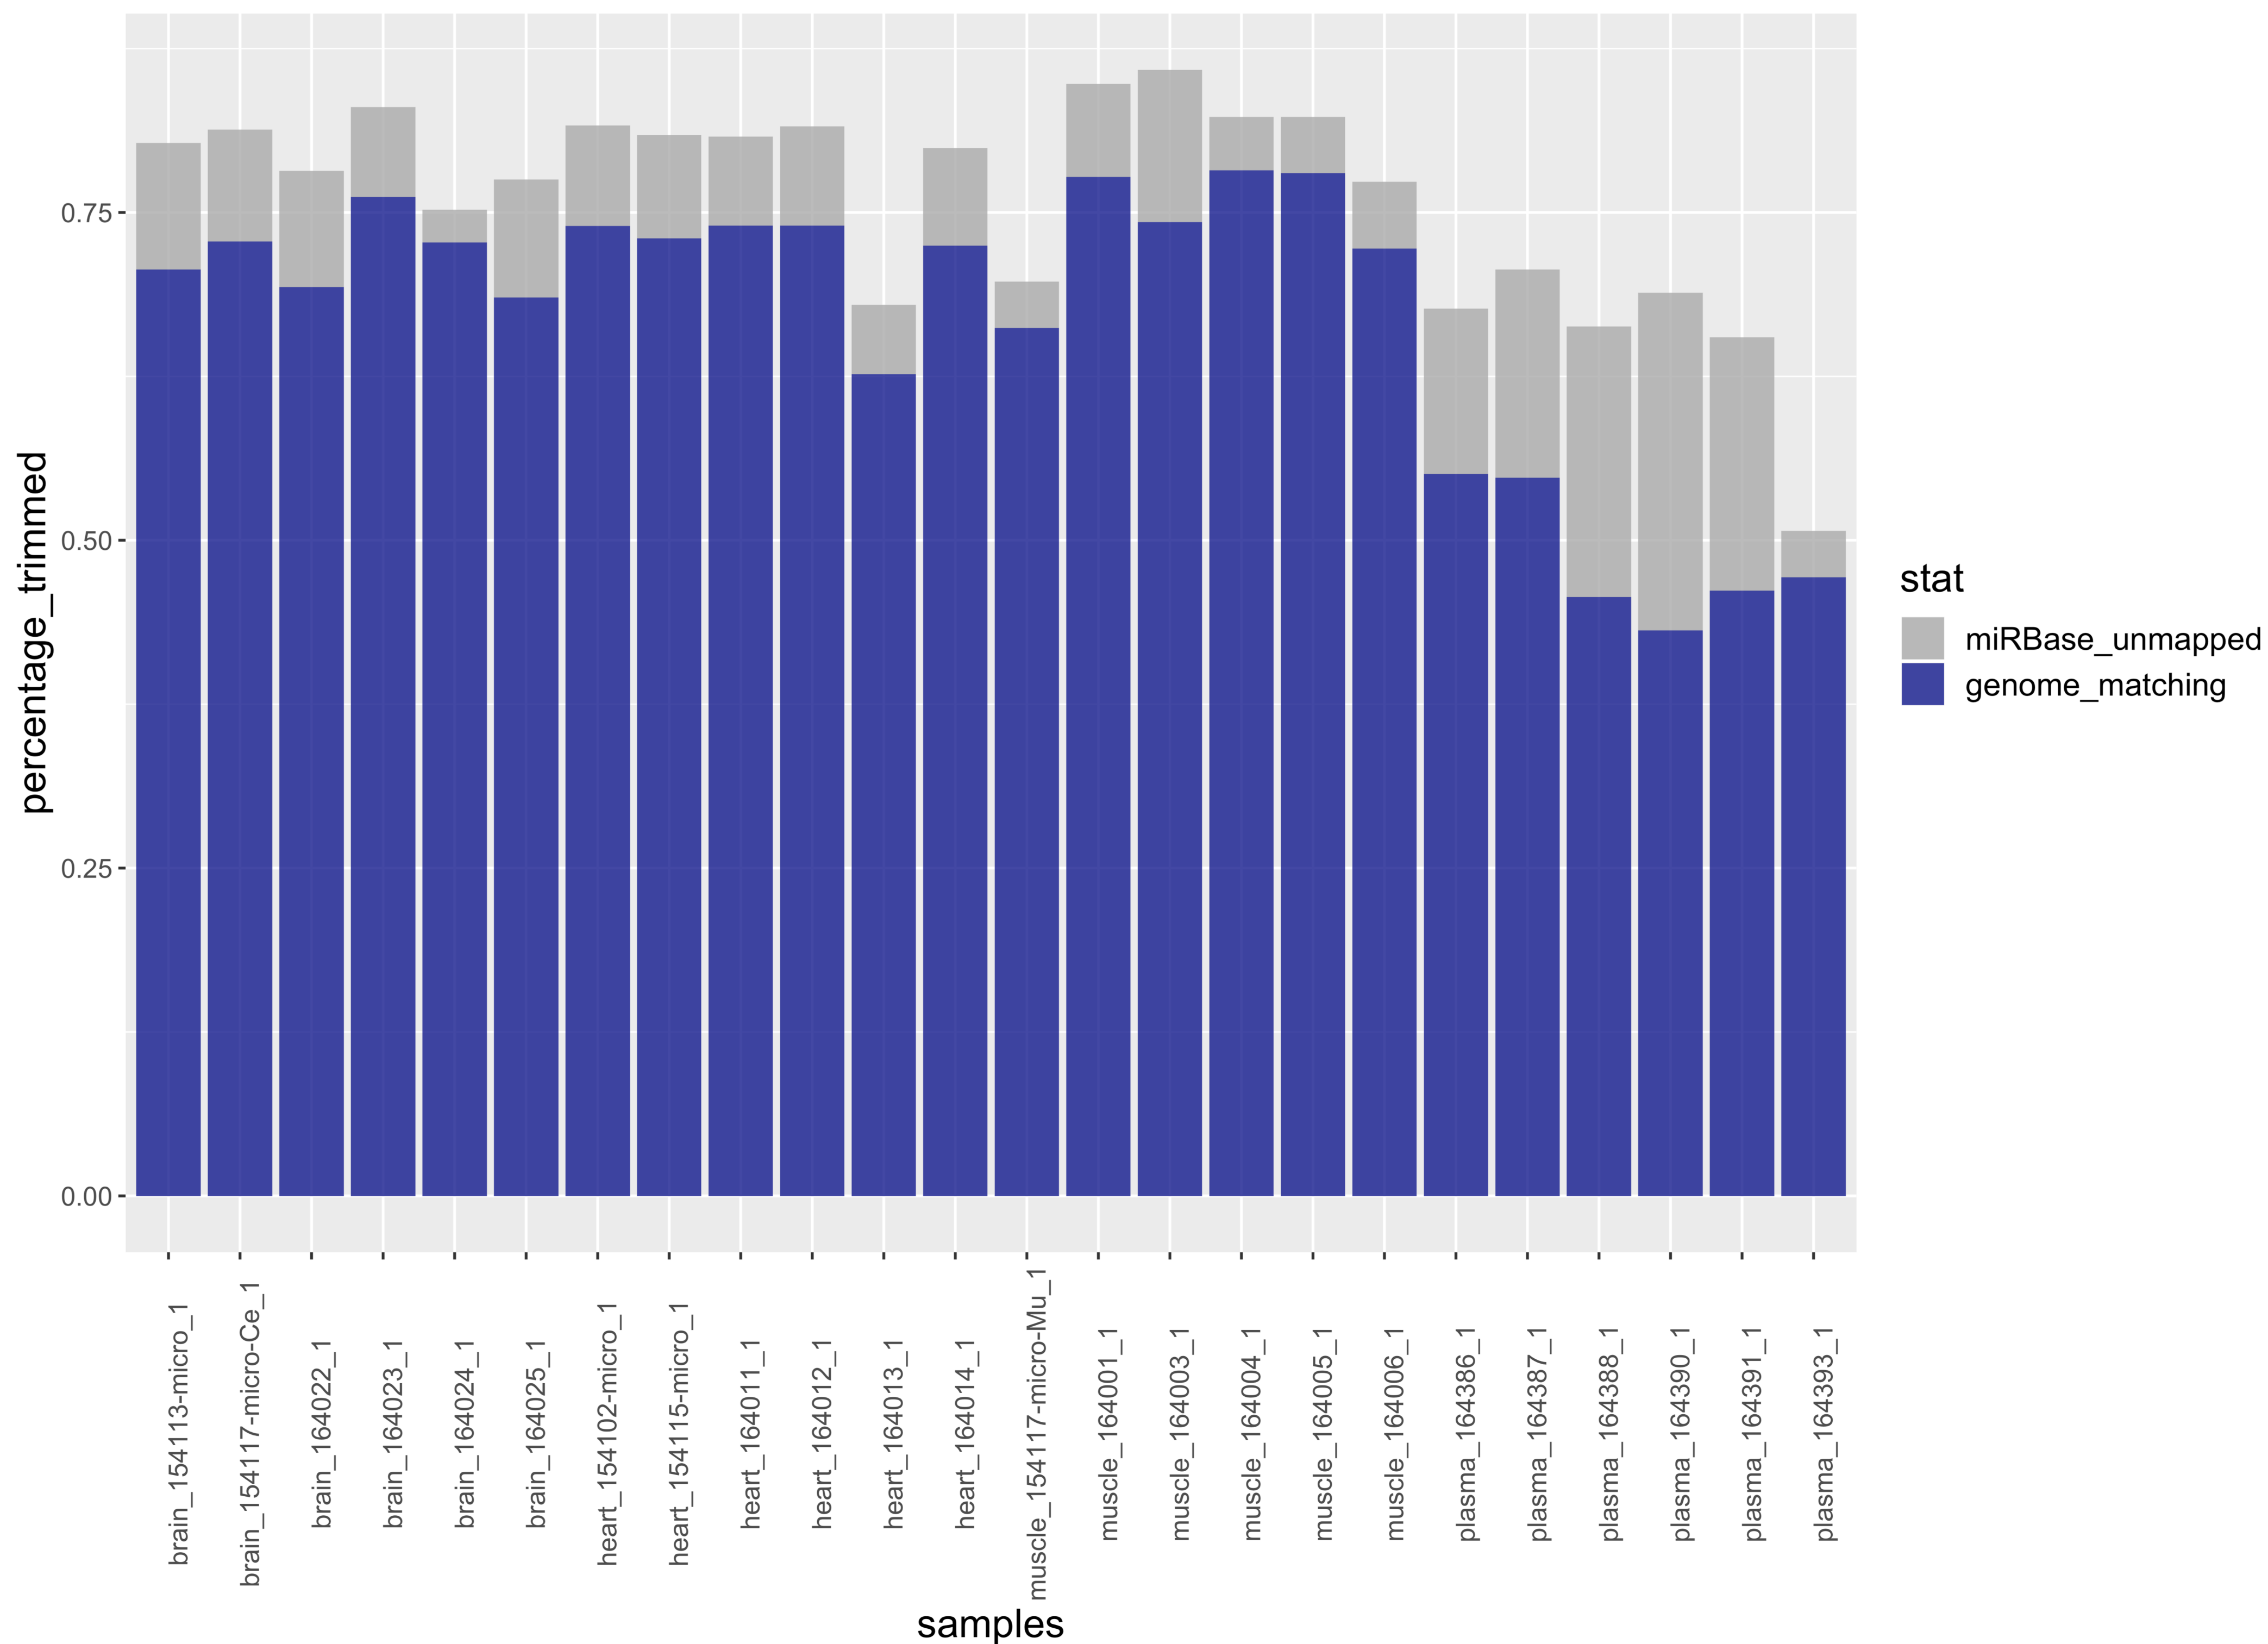

Supplementary Figure S2. Percentage of genome matching reads (no gap or mismatch) compared to the percentage of unmapped reads having a perfect match to a miRBase annotated miRNA.

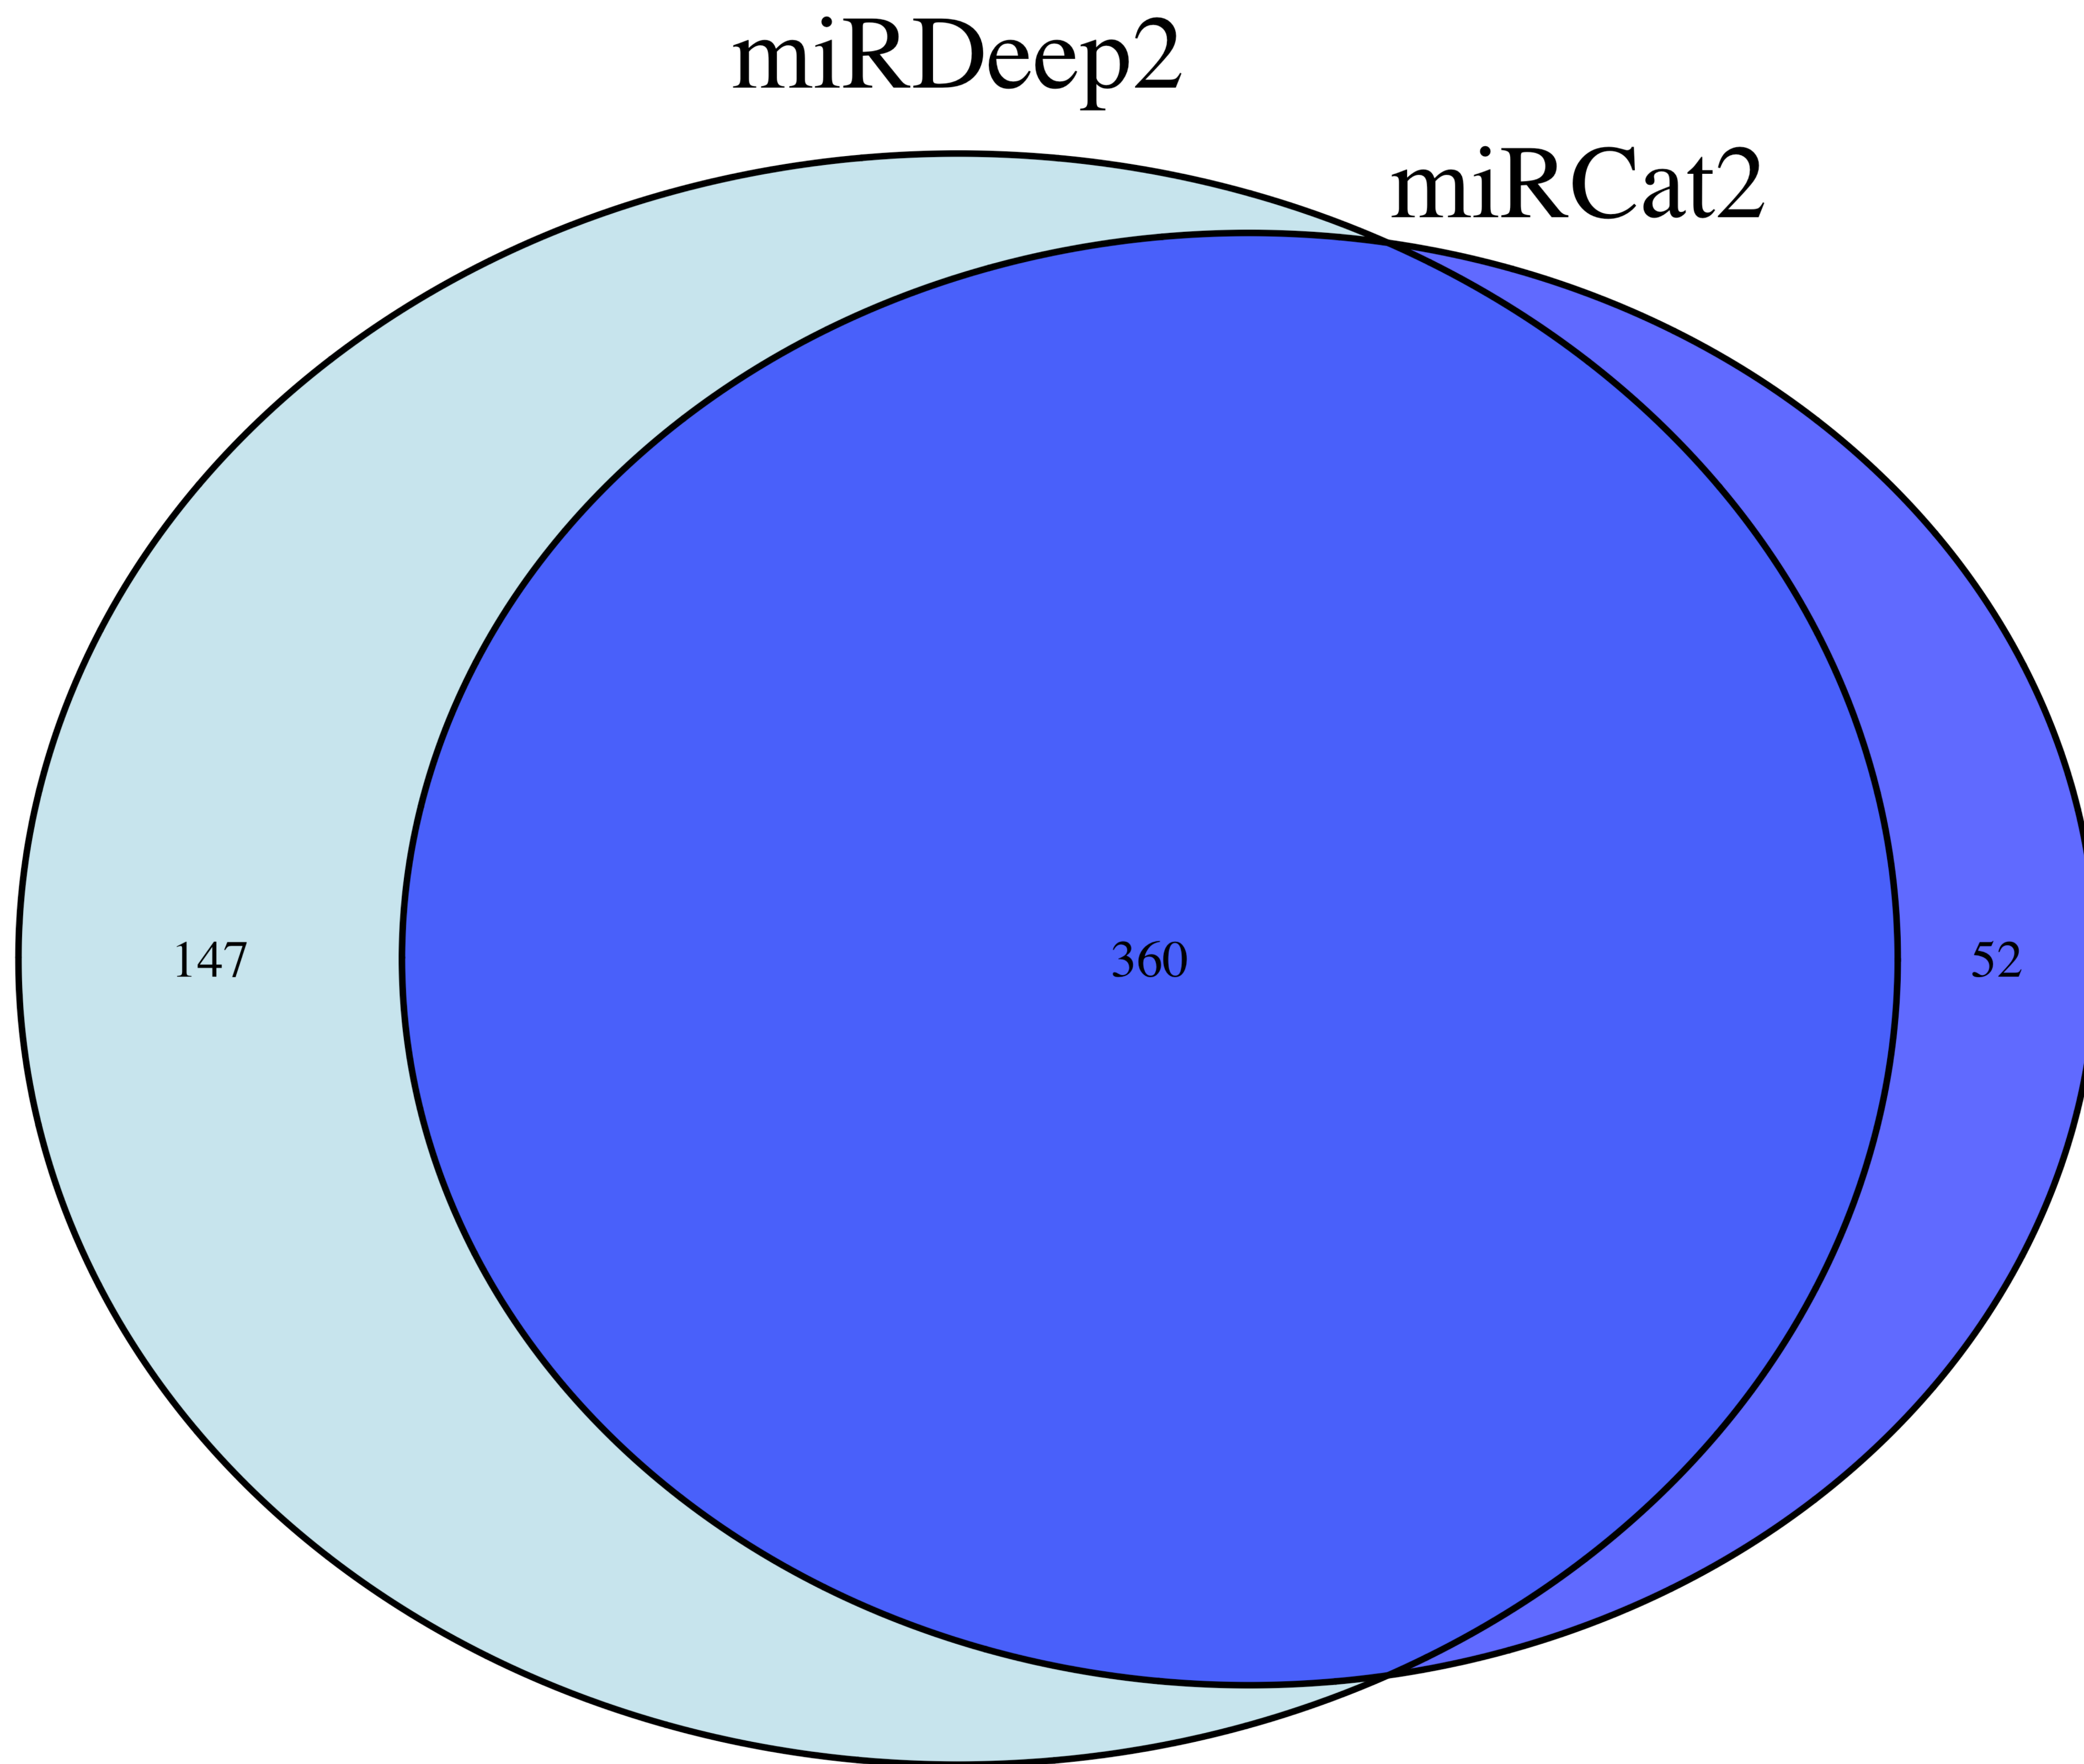

miRDeep2

miRCat2

147

360

52

Supplementary Figure S3. Venn diagram showing the intersection between miRCat2 and miRDeep2 predictions

Supplementary Figure S4. Secondary structure plots for all 559 annotated miRNA loci, as predicted using the *ViennaRNA* package. Green and purple colors highlight the miRNA-5p and miRNA-3p sequences, respectively.











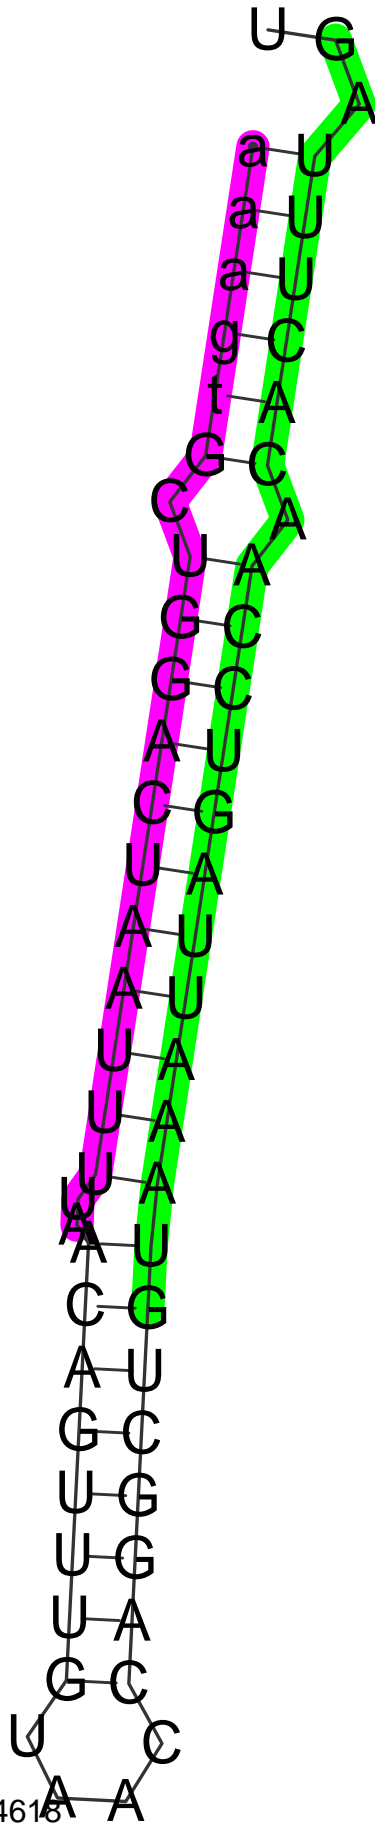

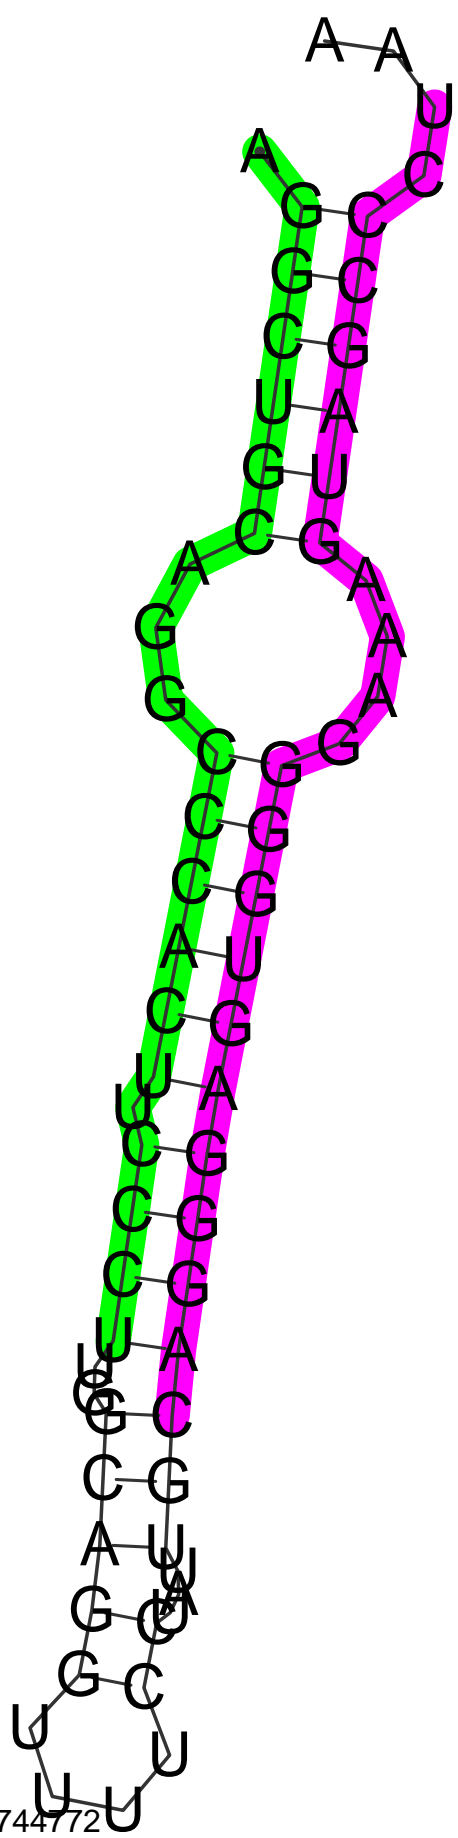

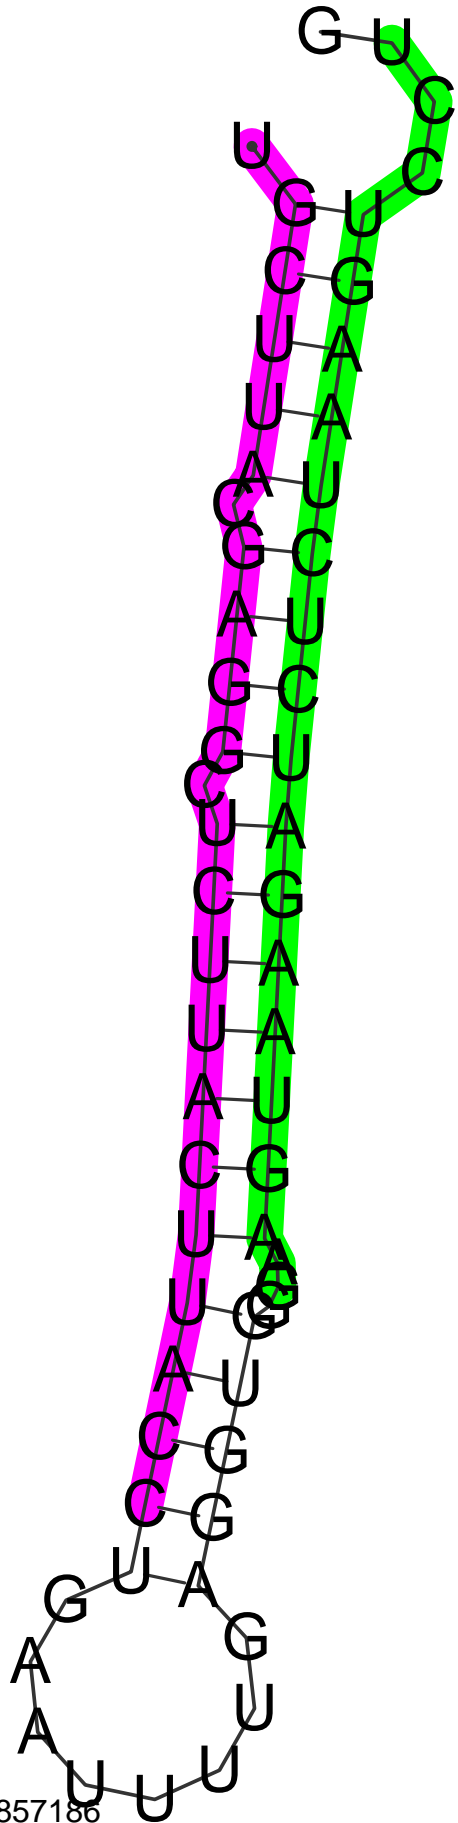





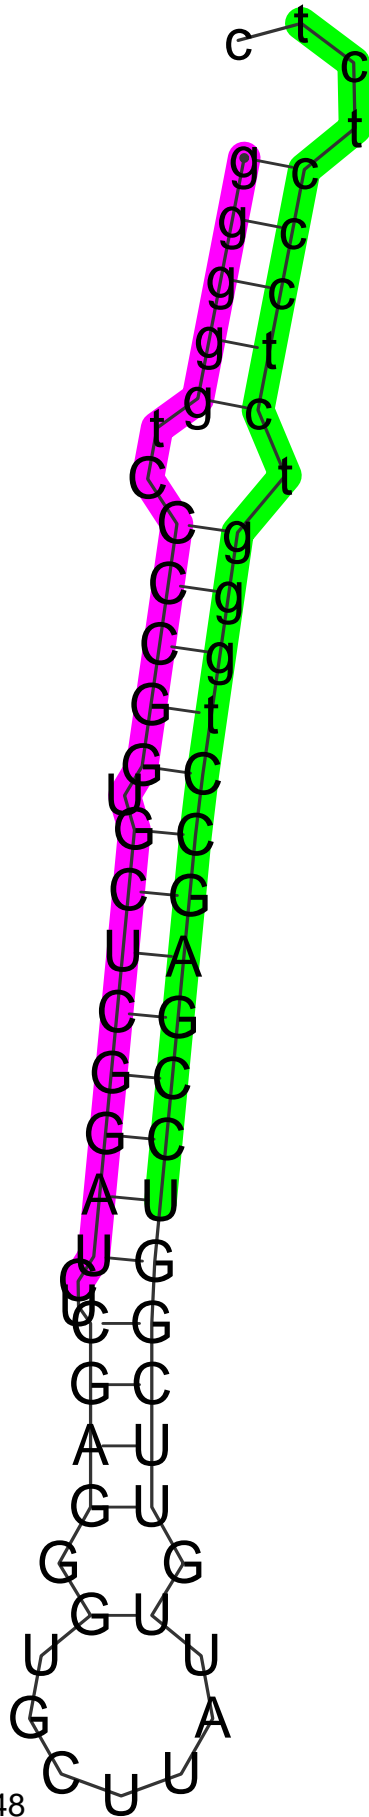





















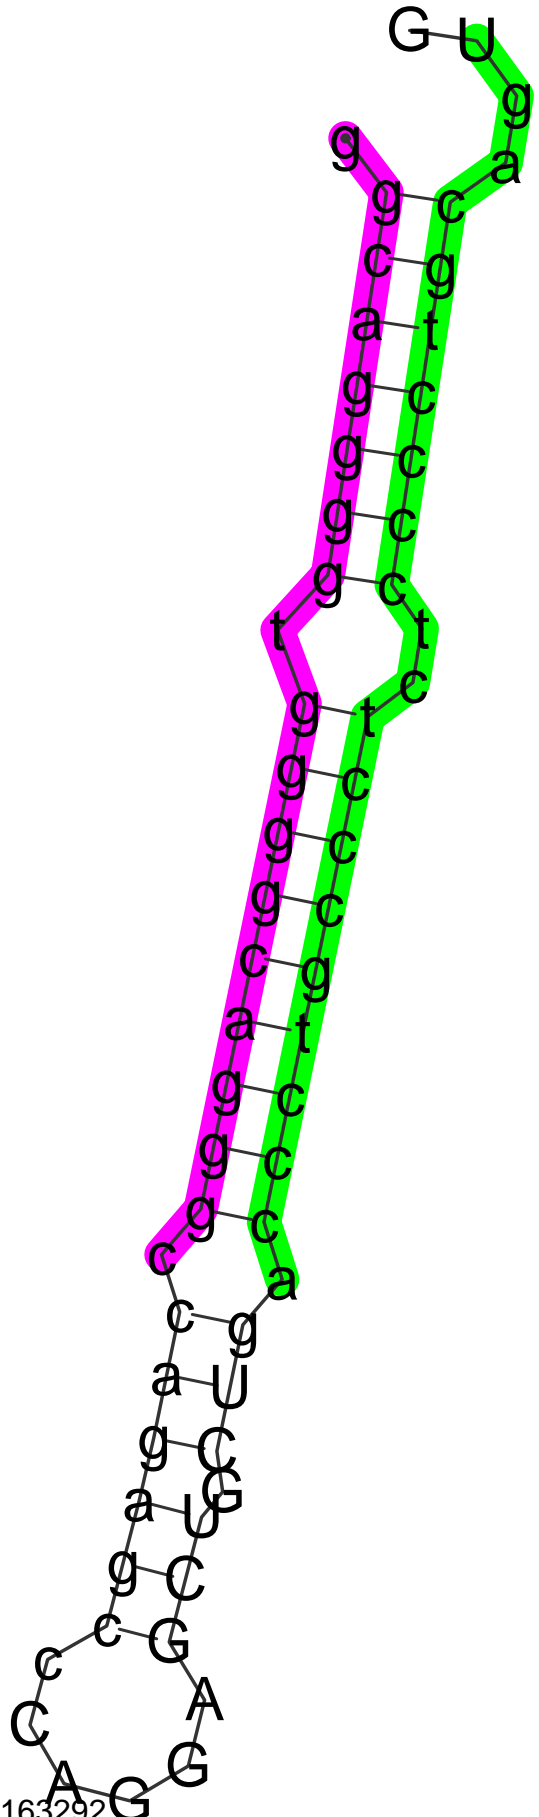



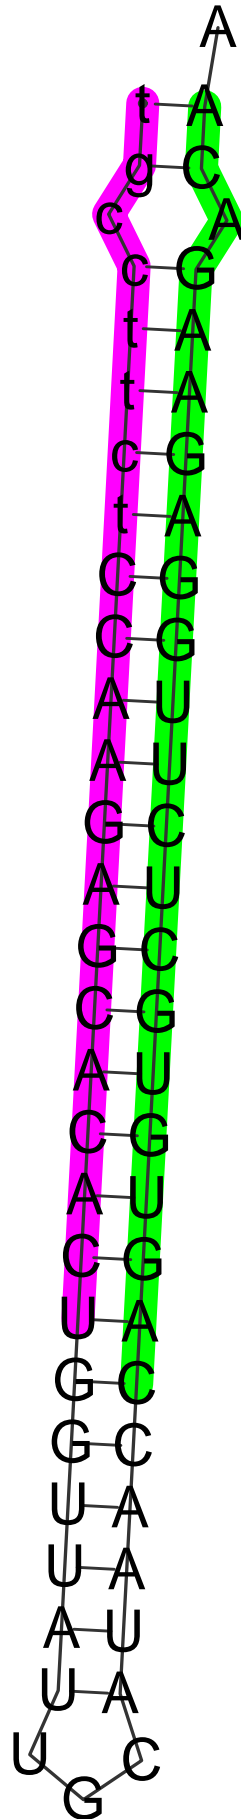





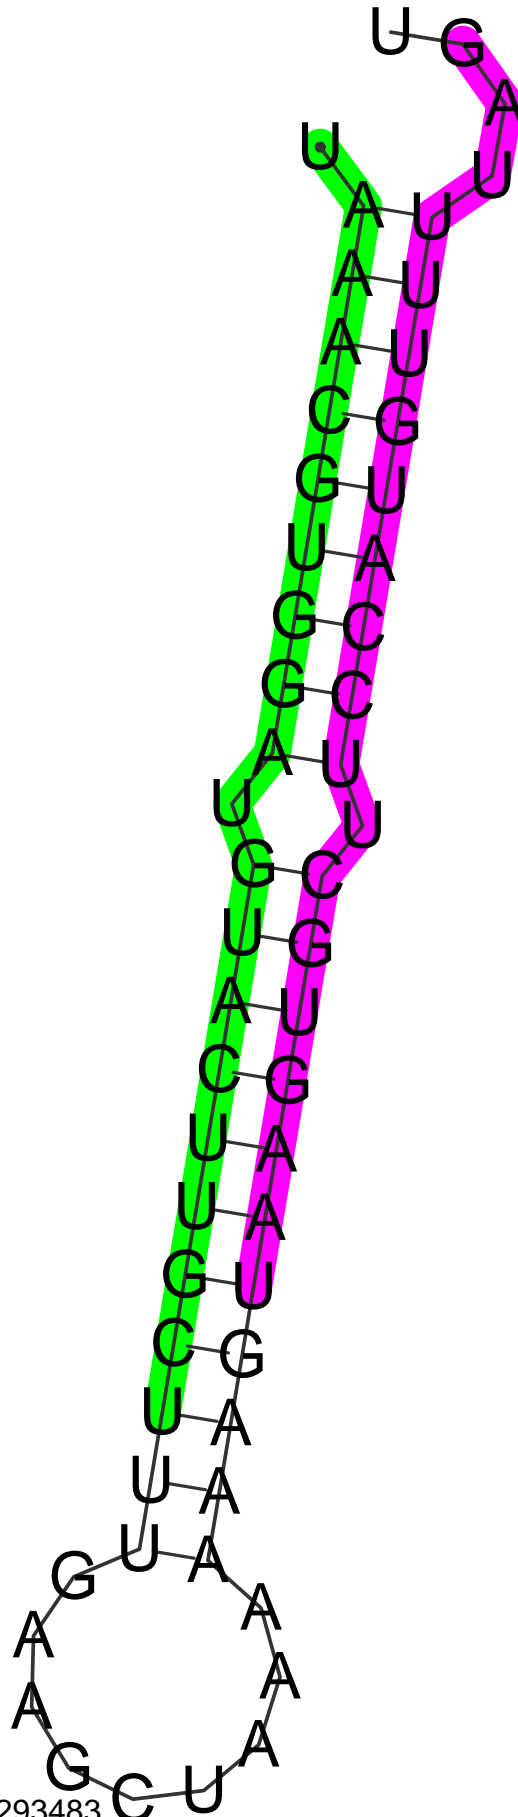



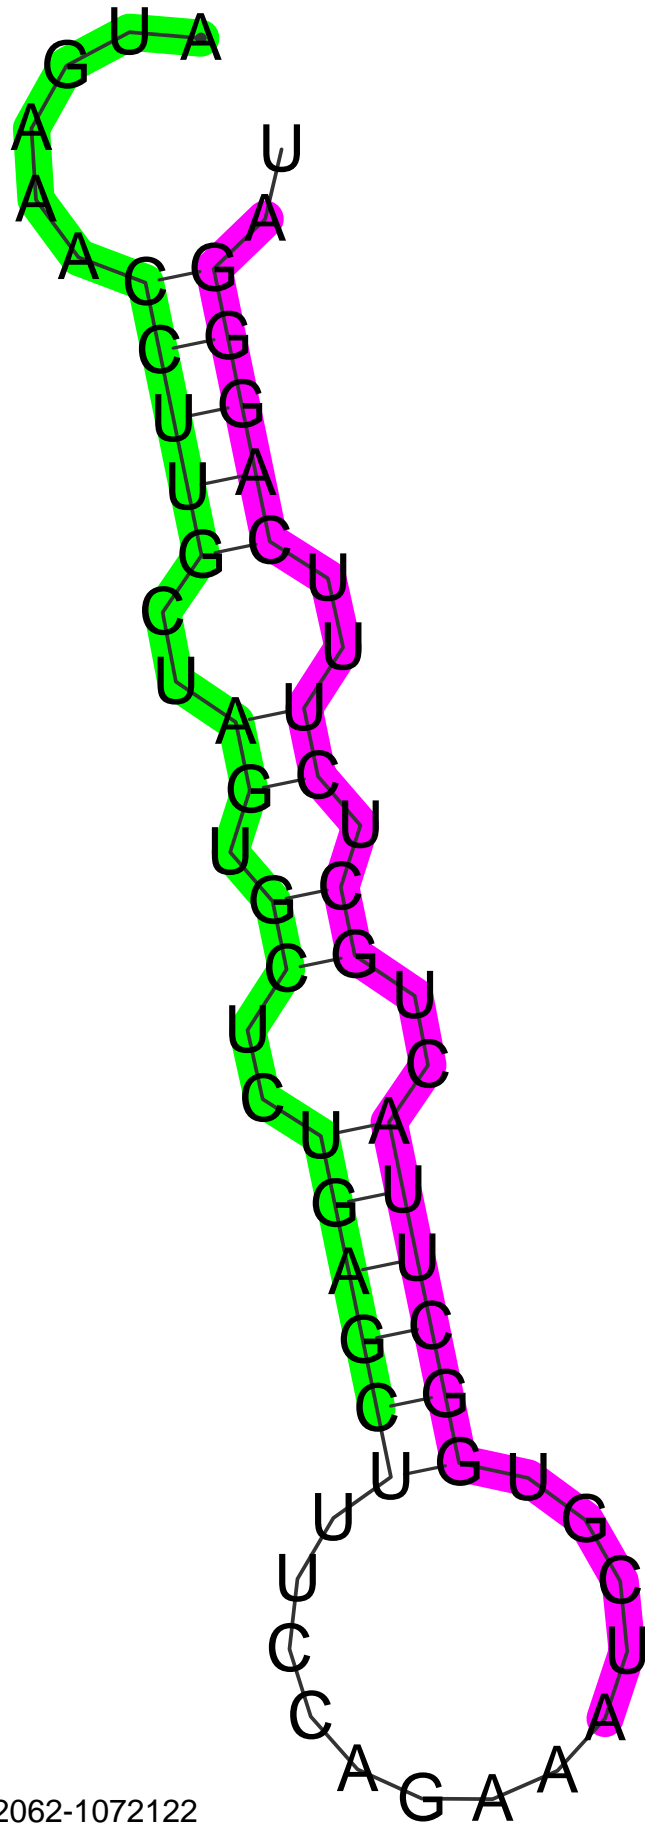

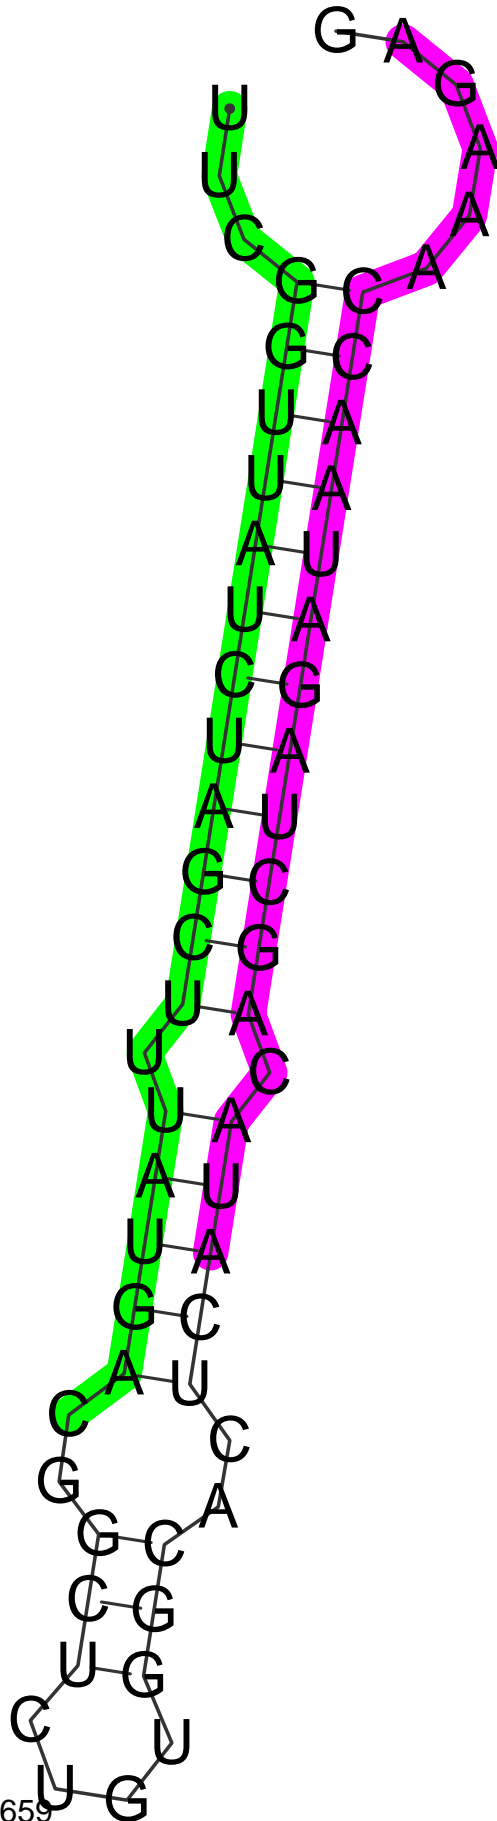

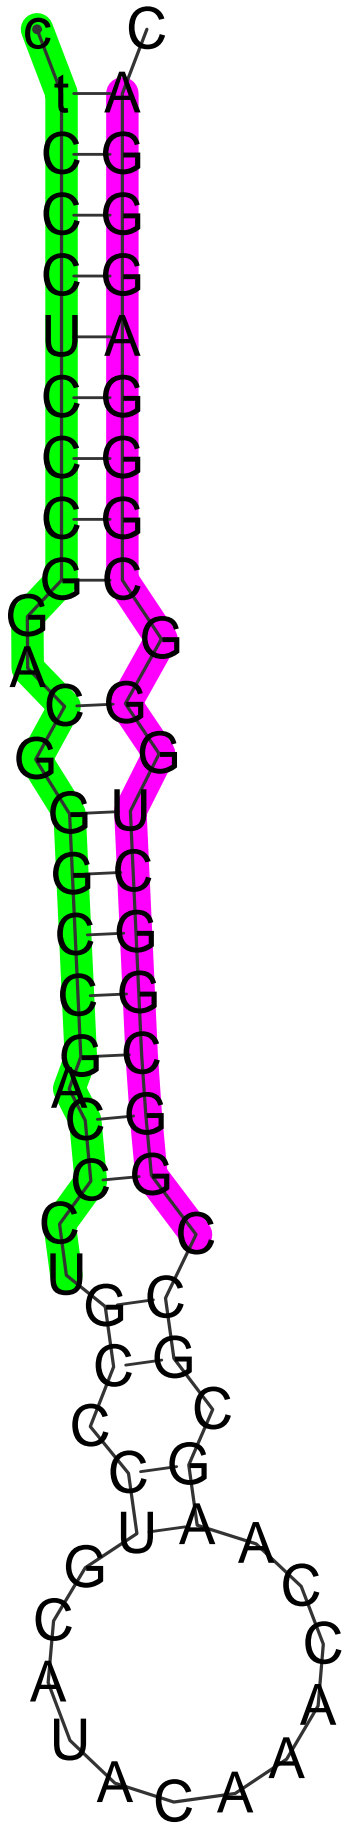

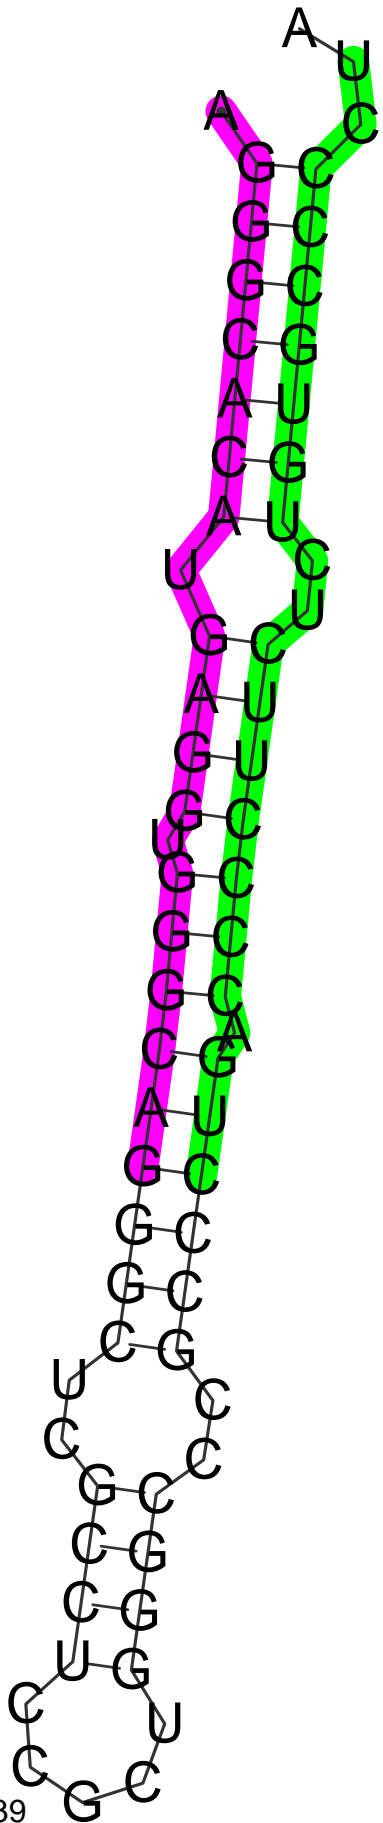

NW\_006383464.1\_555474-555539

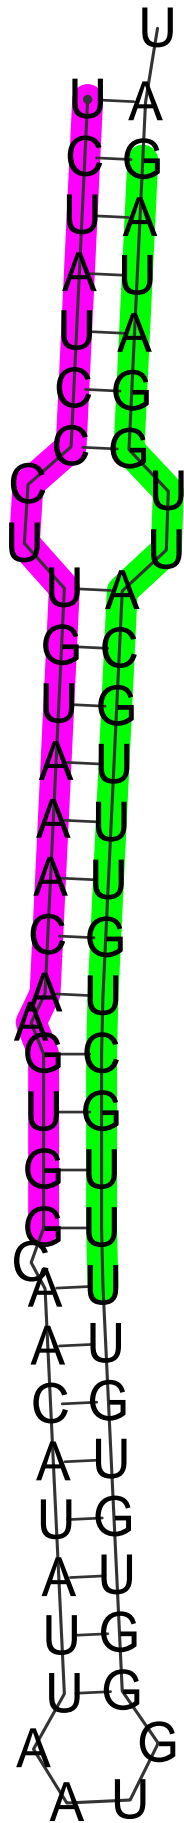

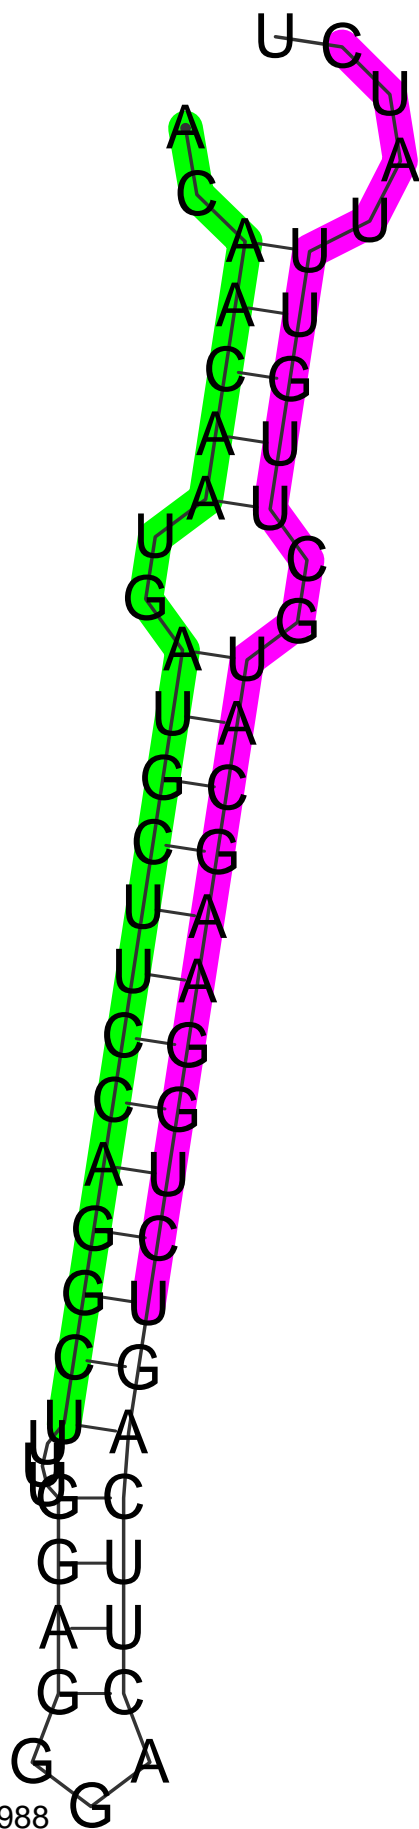

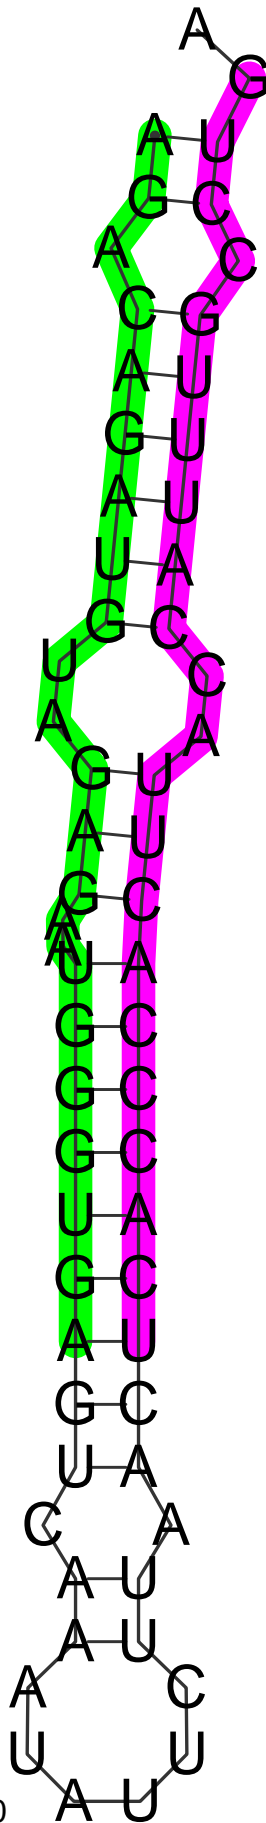

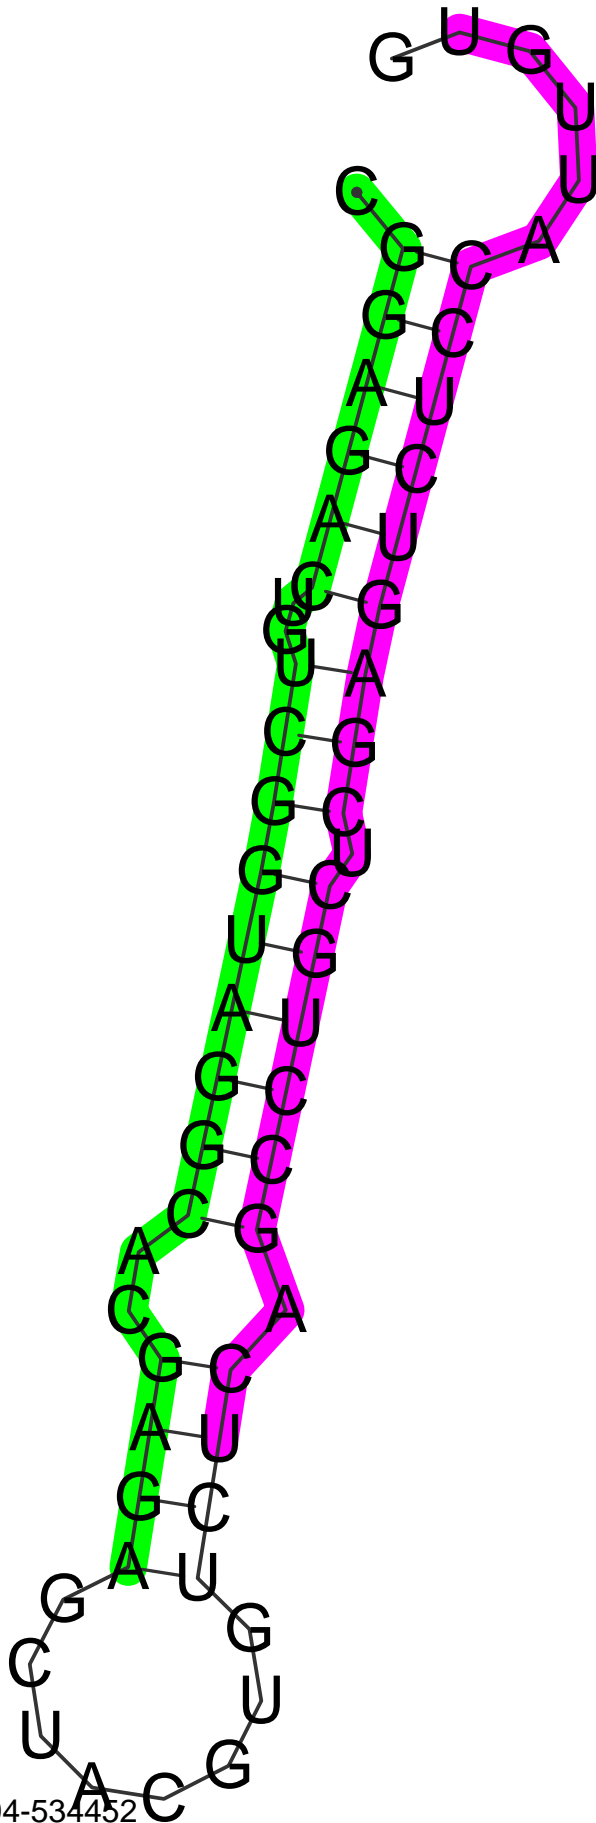



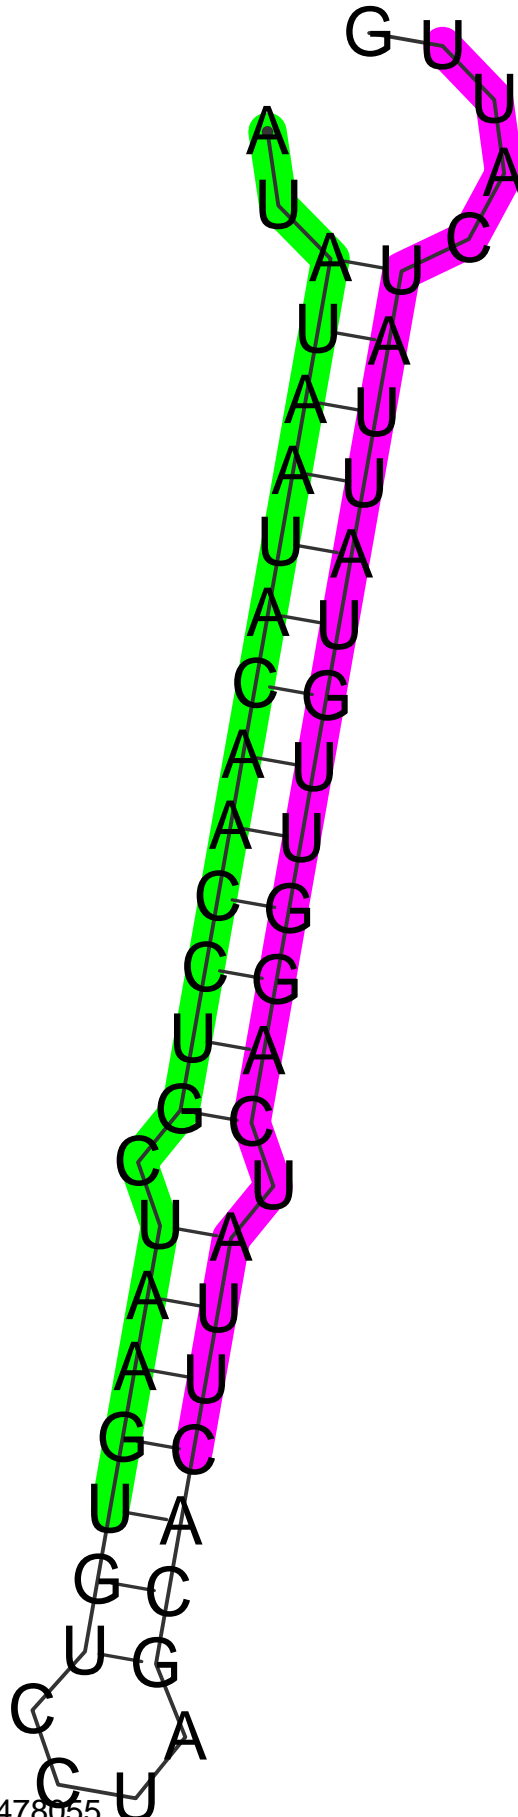

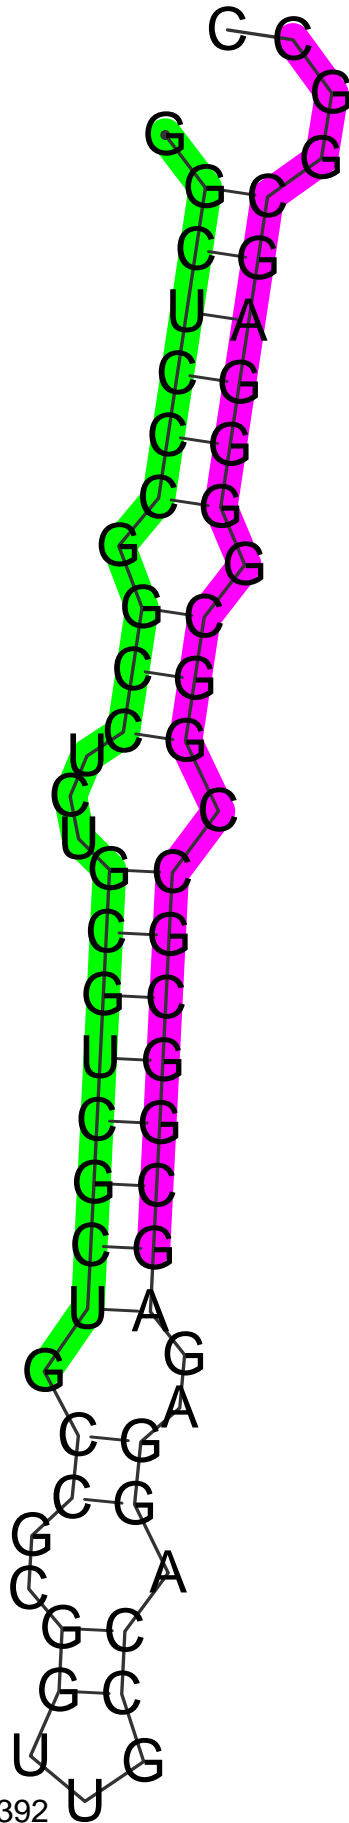

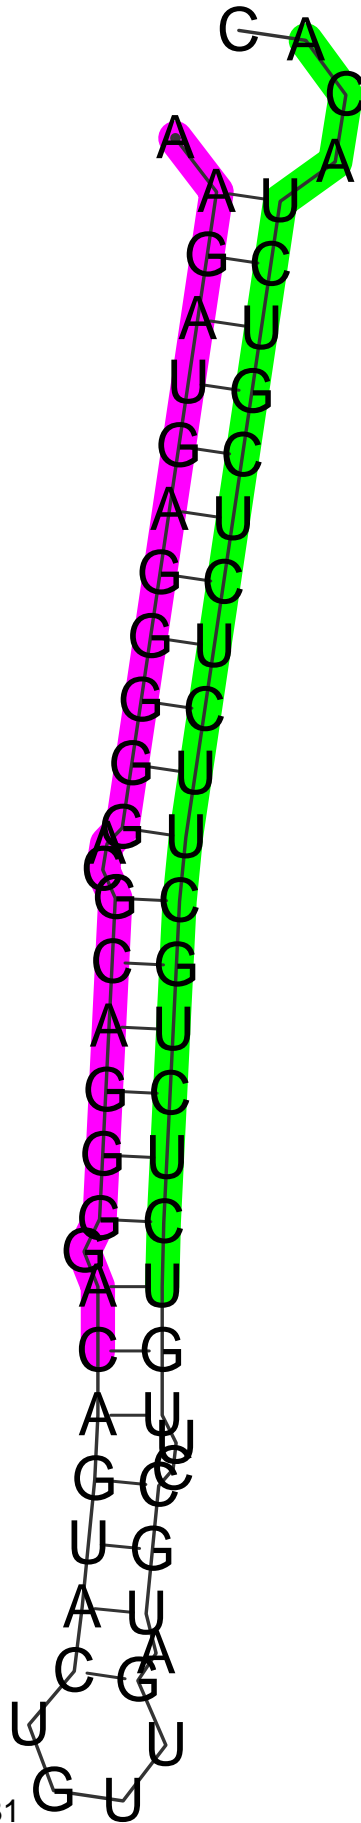

NW\_006383552.1\_184369-184431



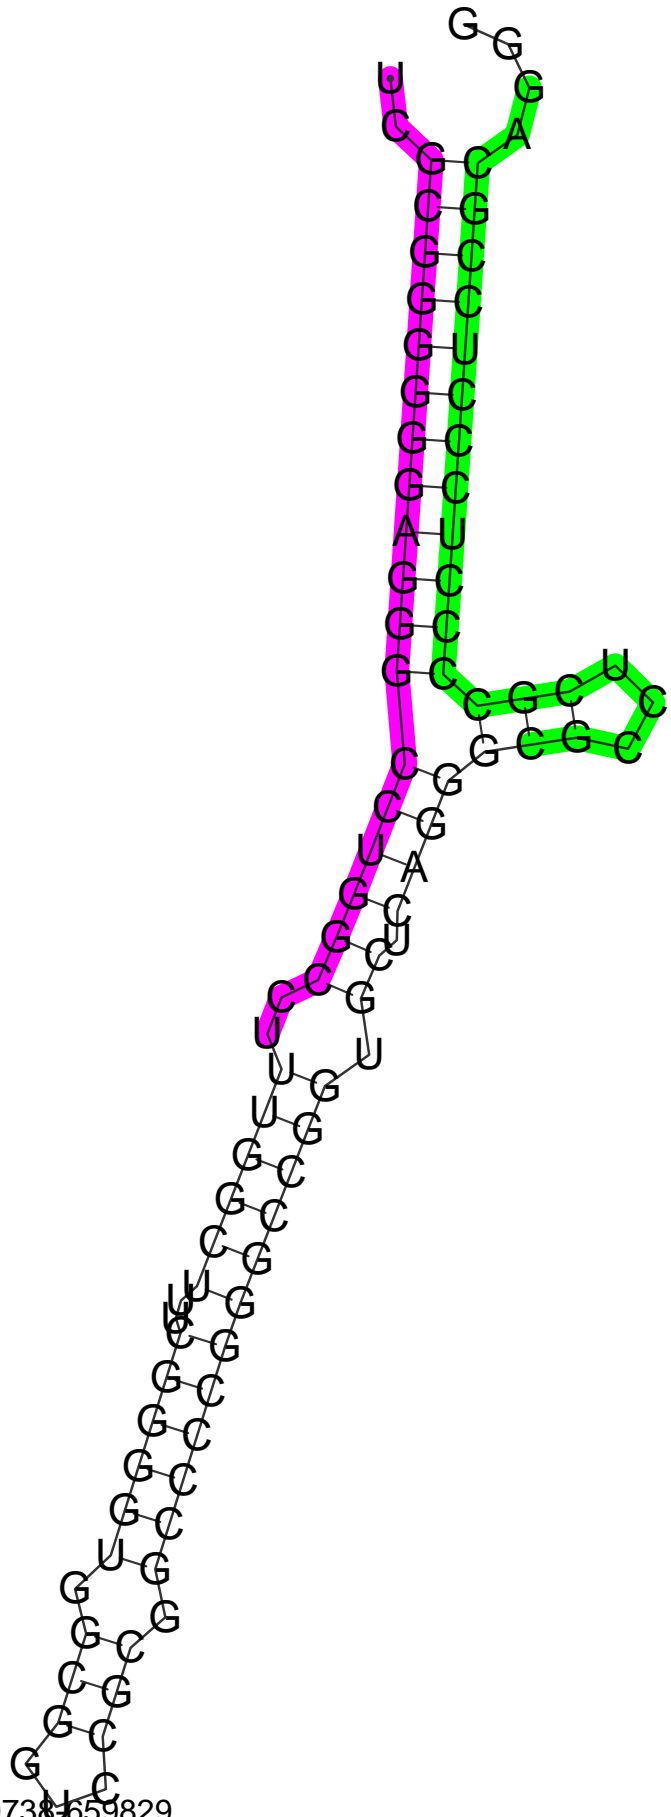





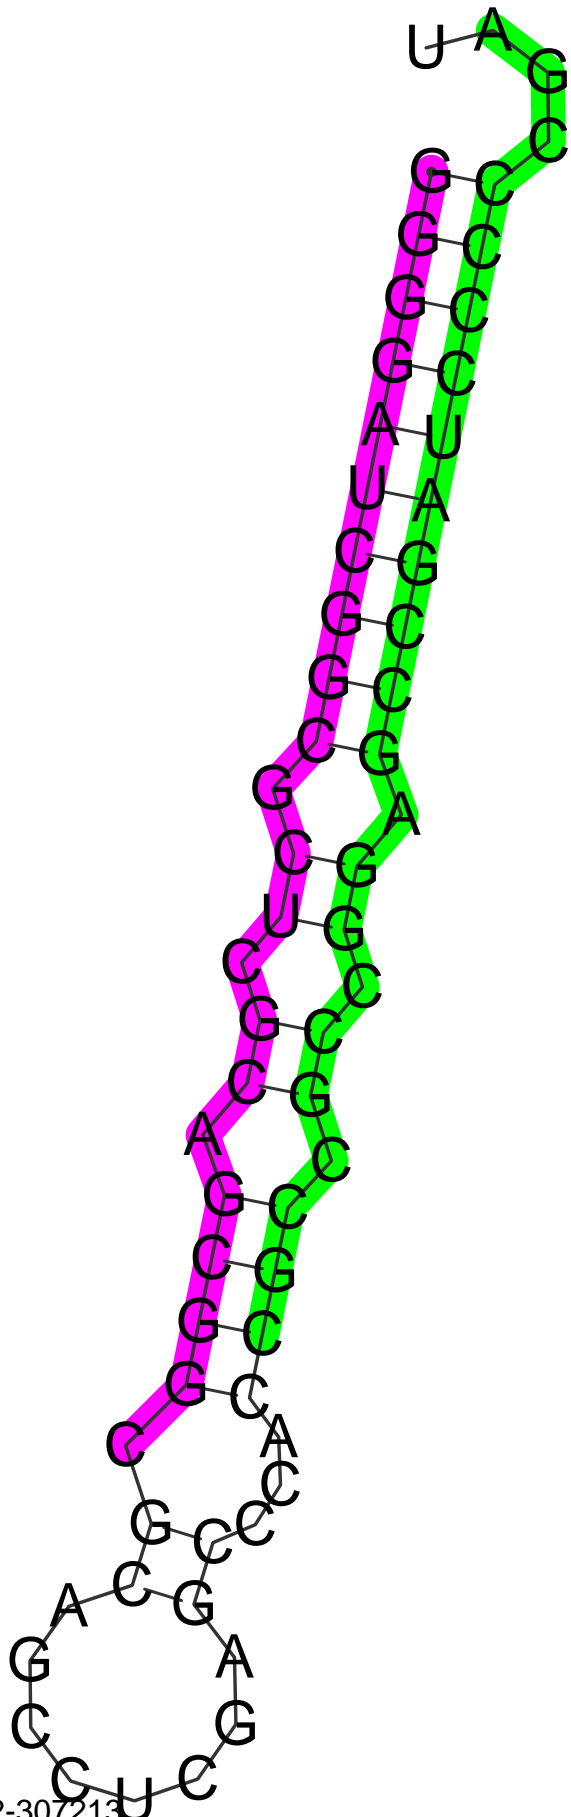





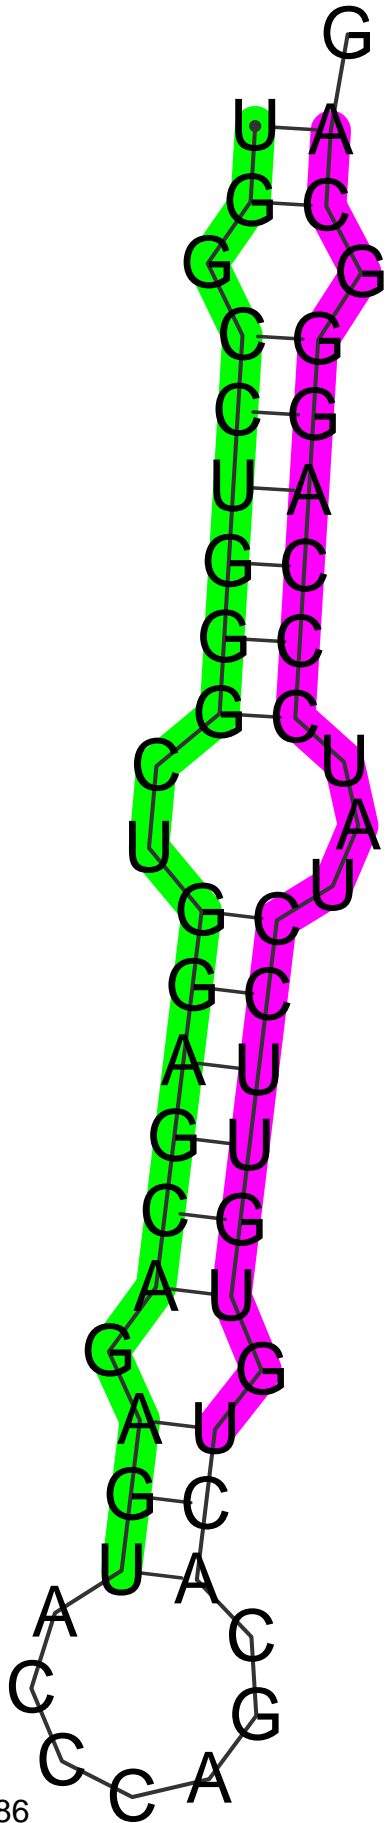







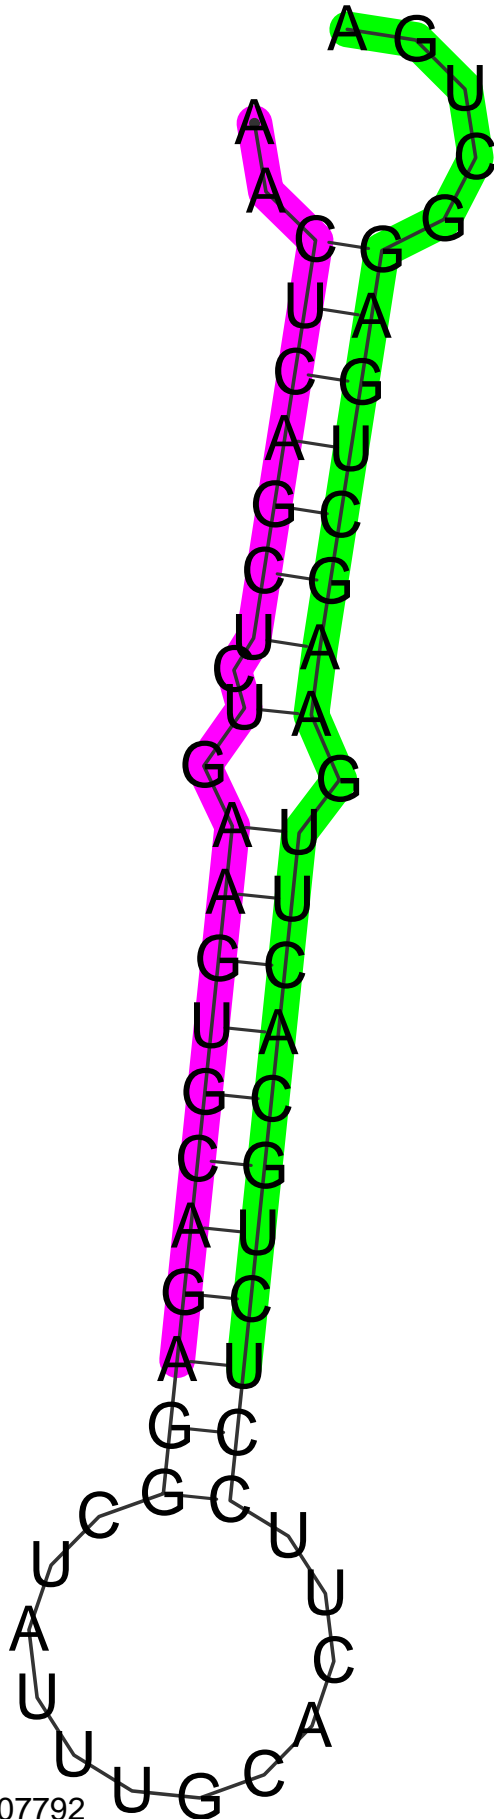

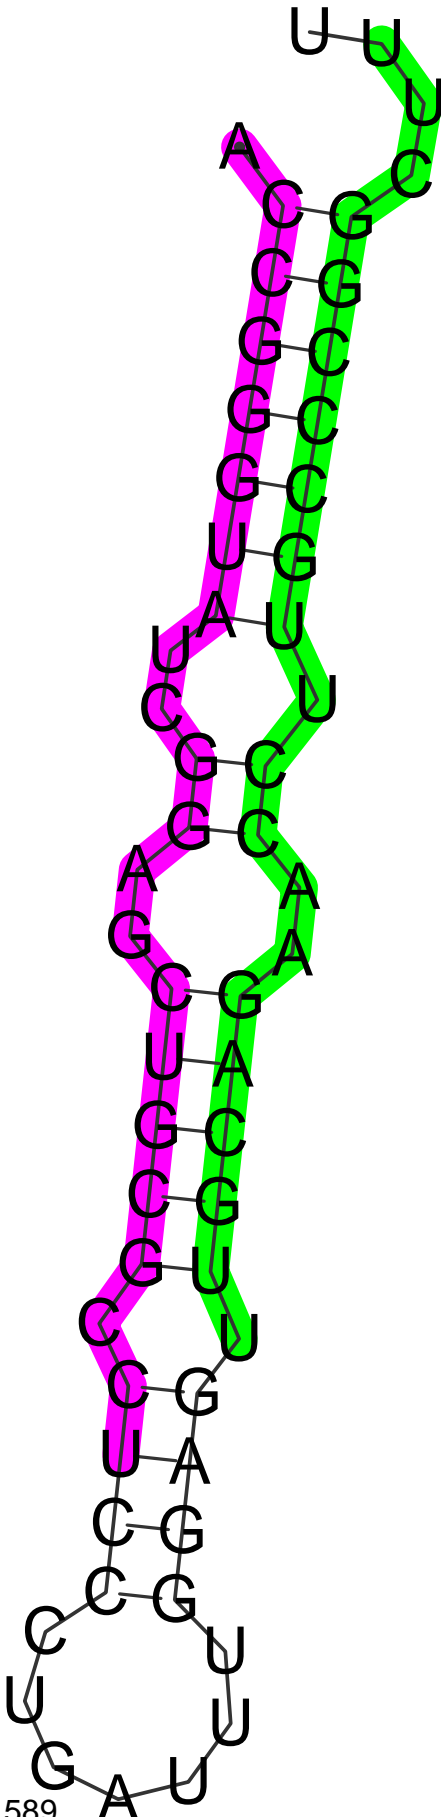

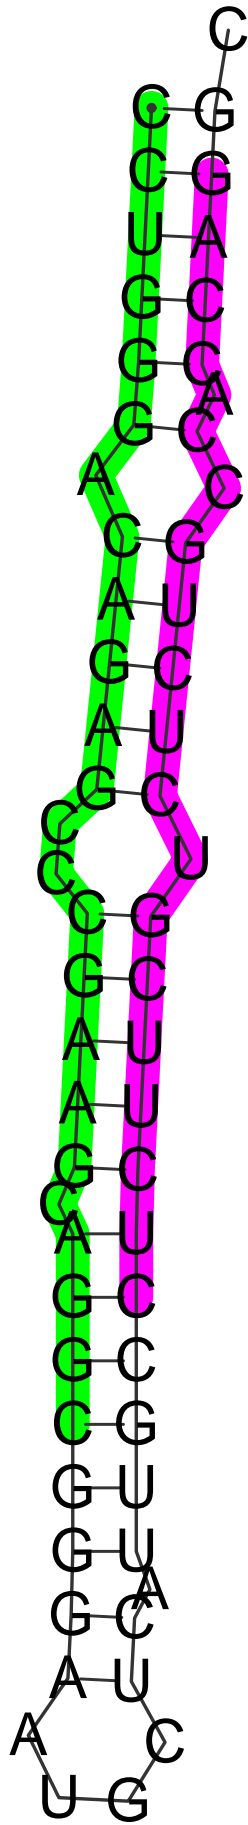





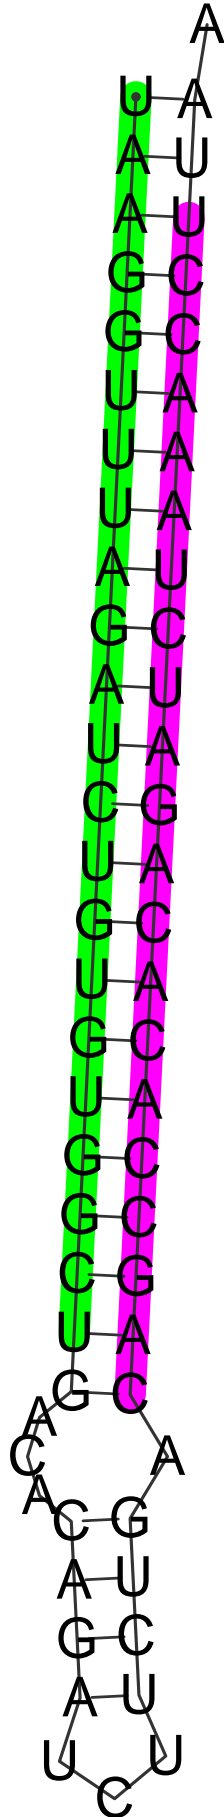

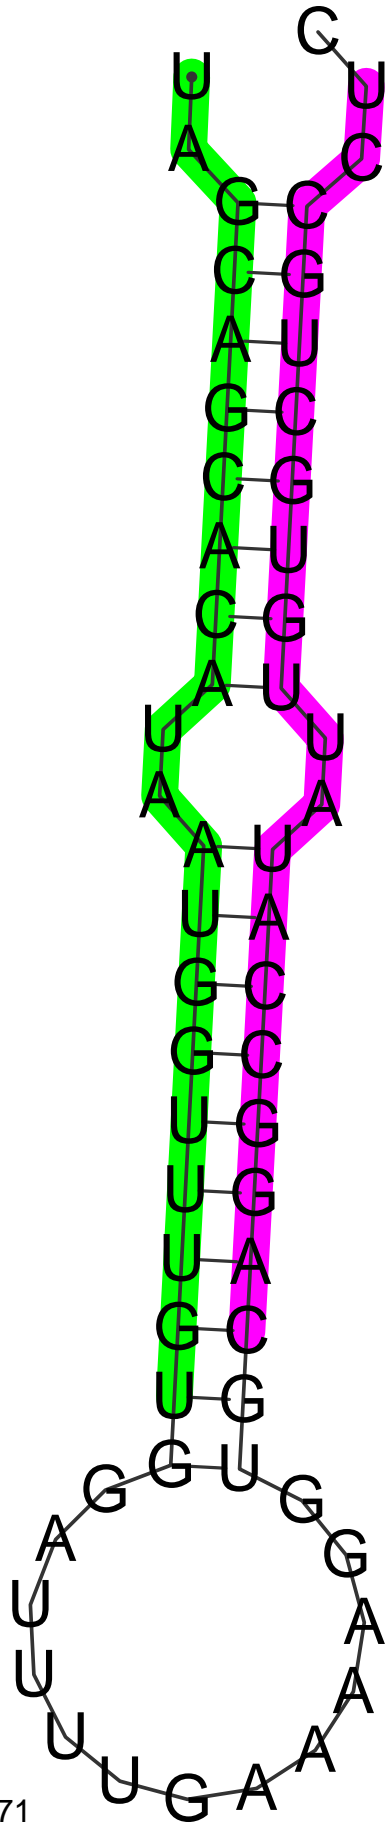

NW\_006383872.1\_162714-162771



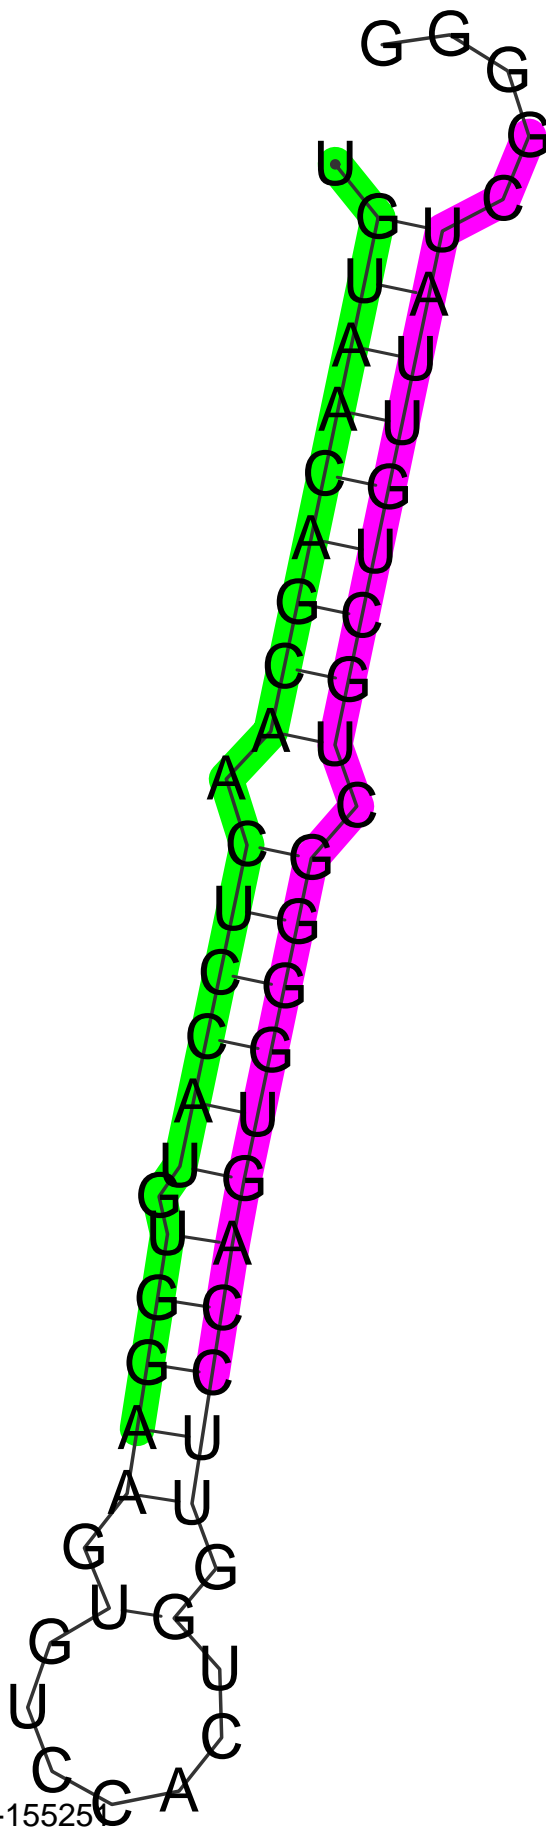

NW\_006383874.1\_155192-155251









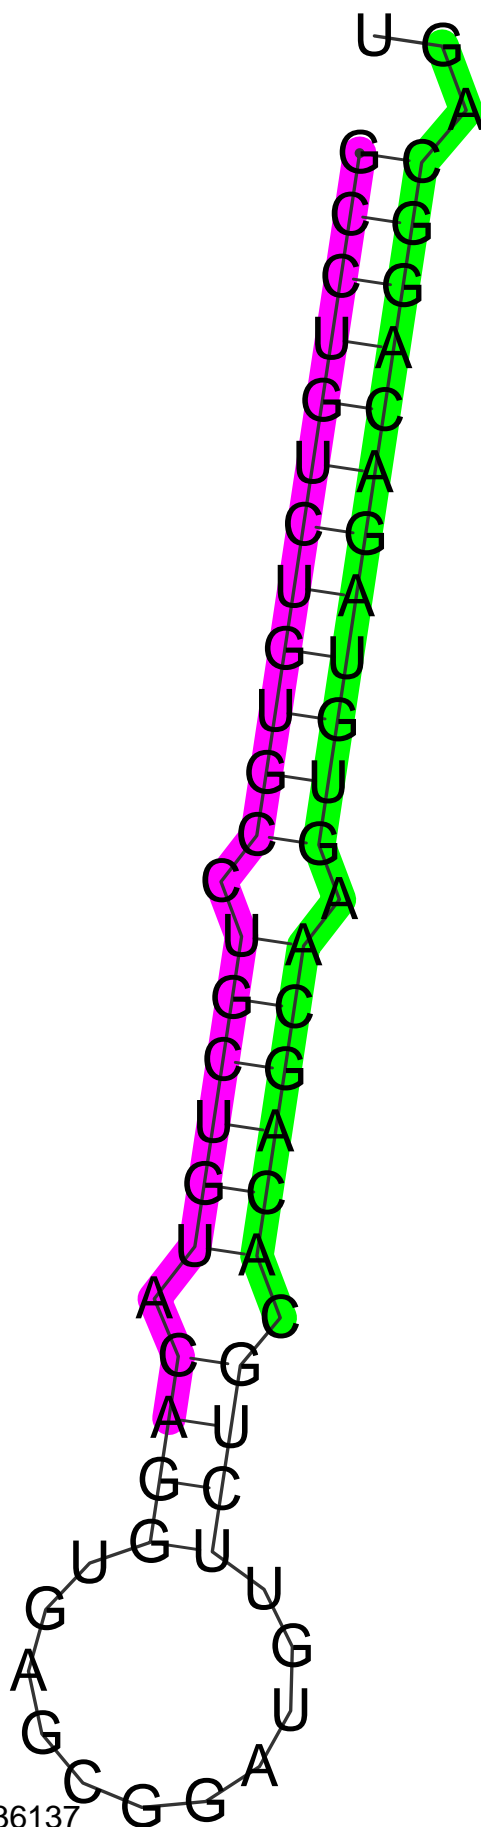

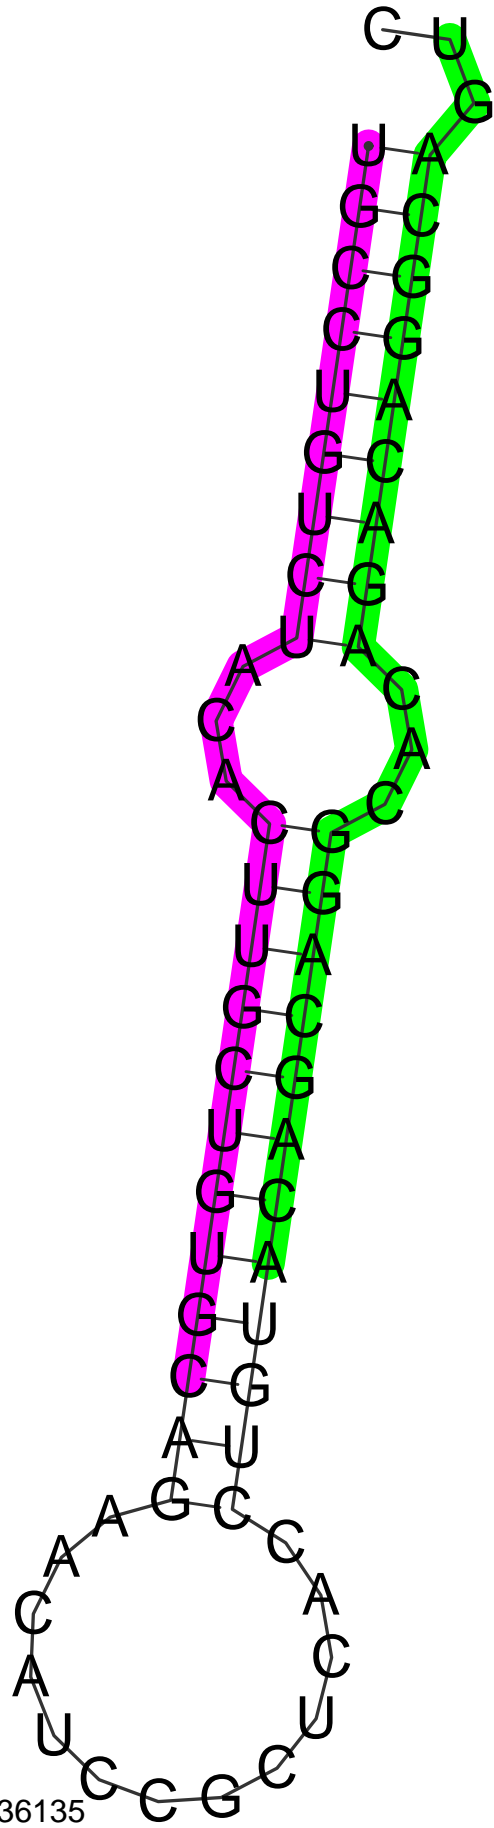



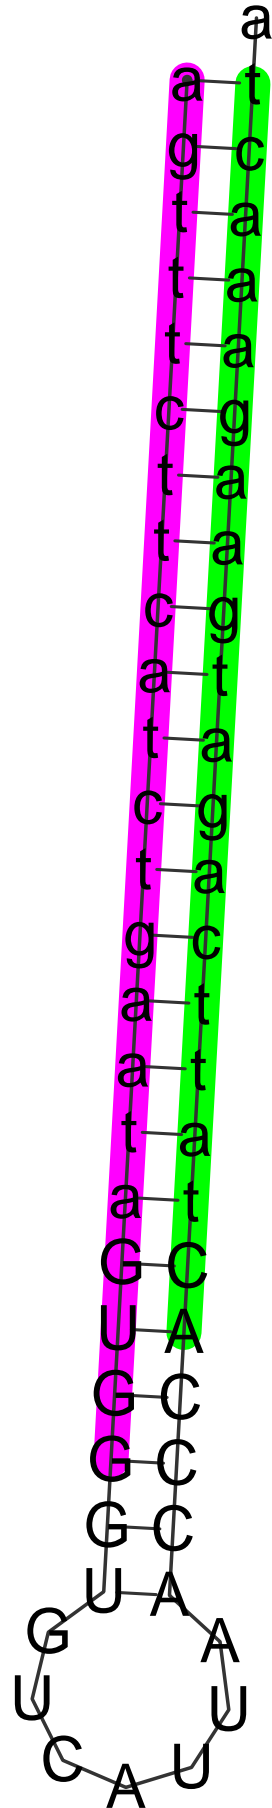

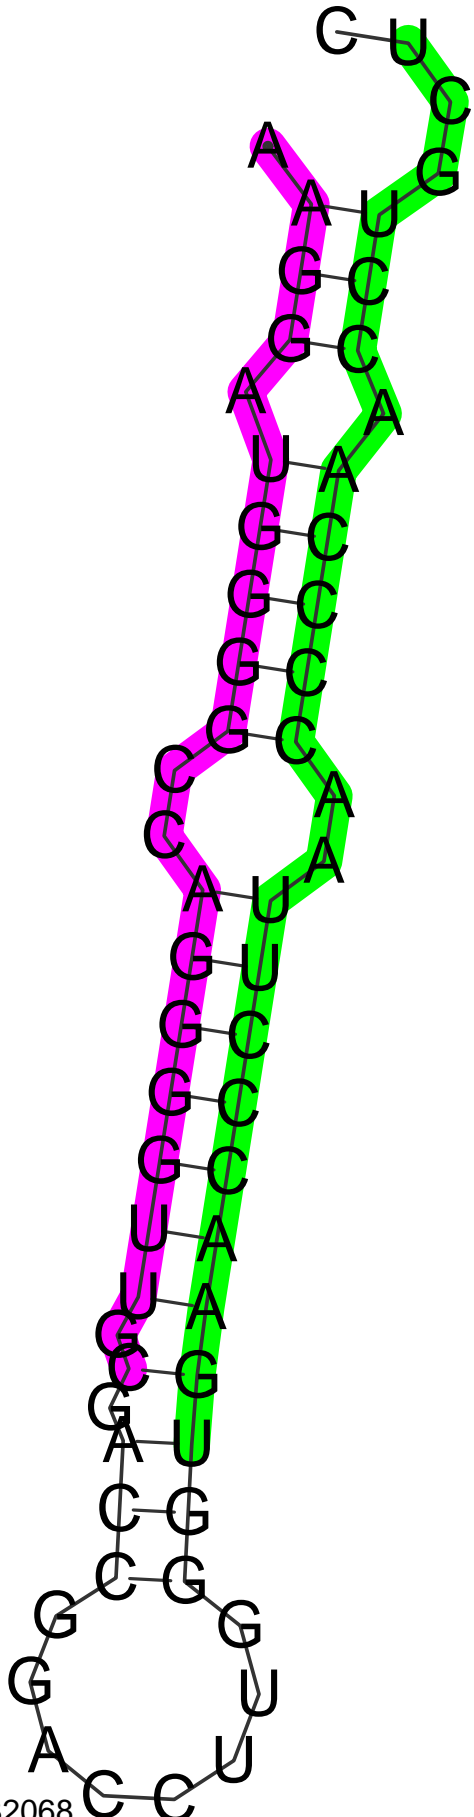

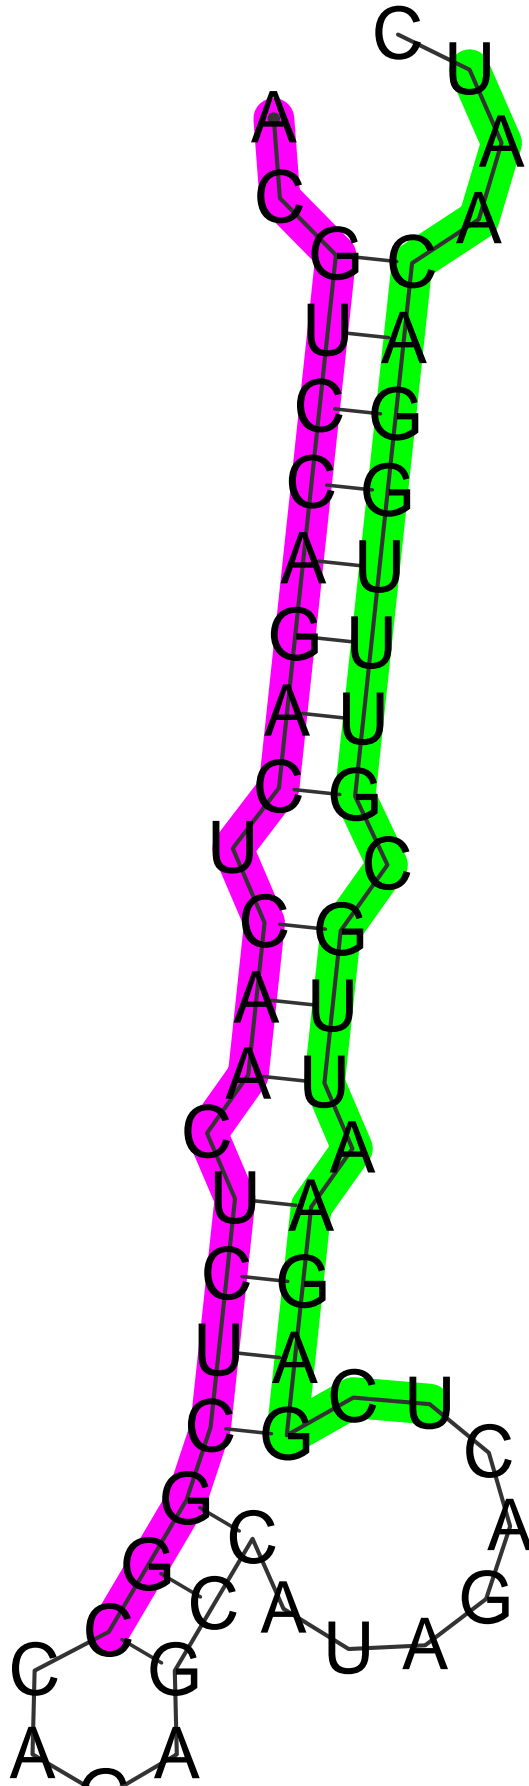

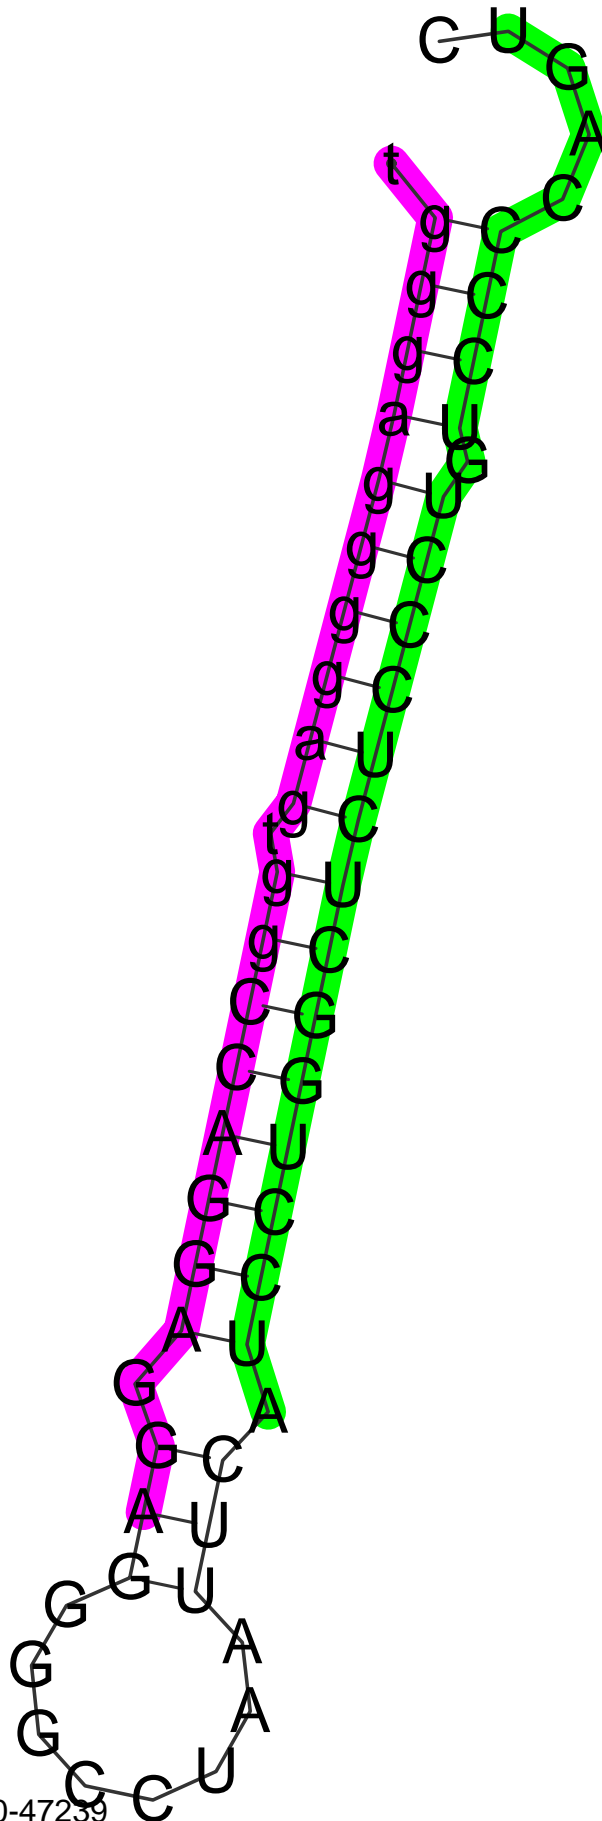





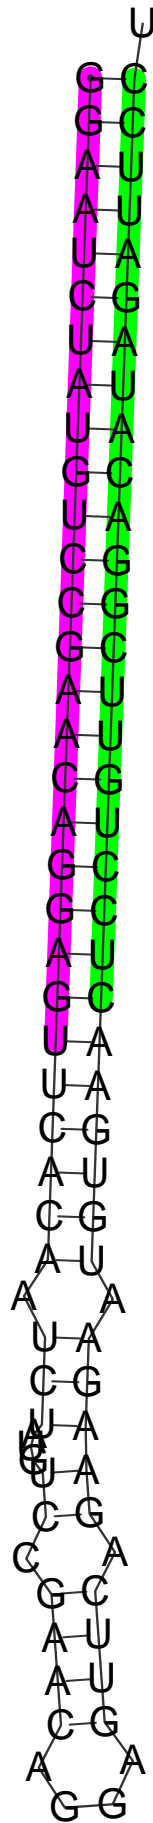



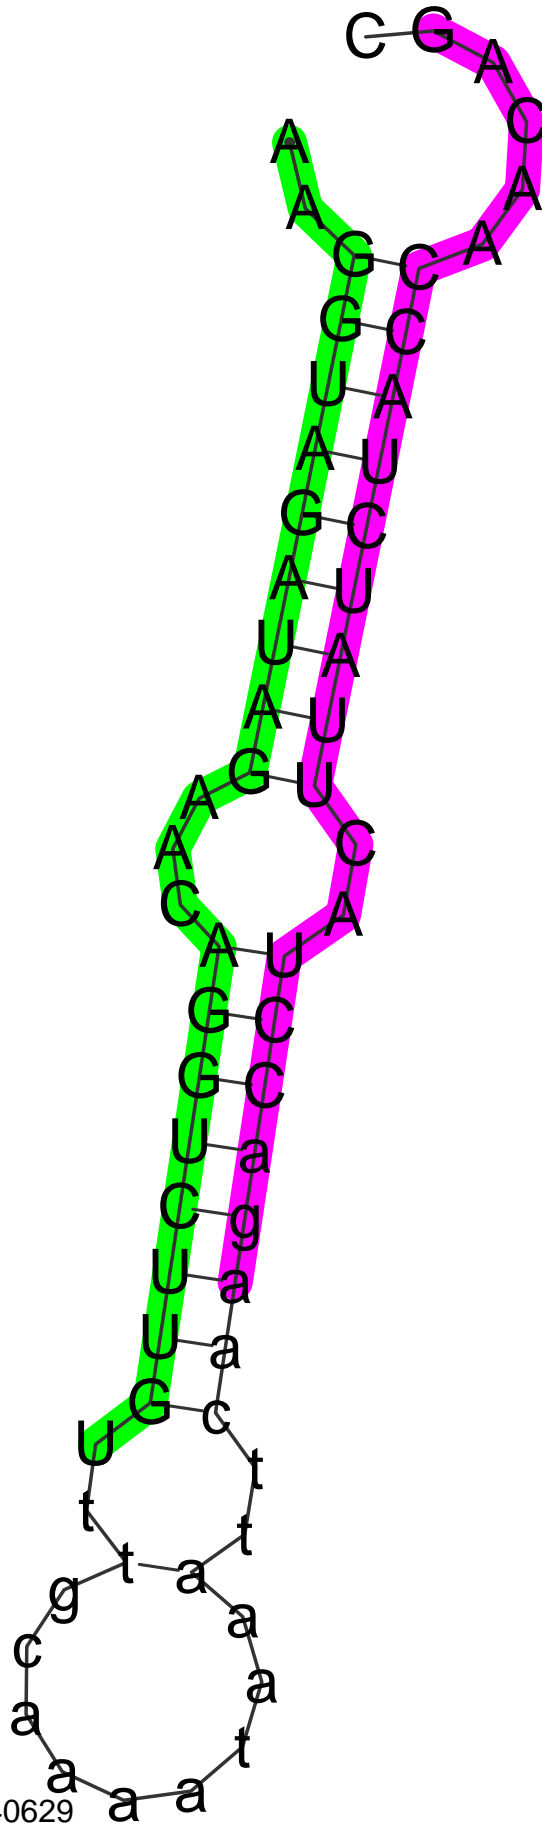

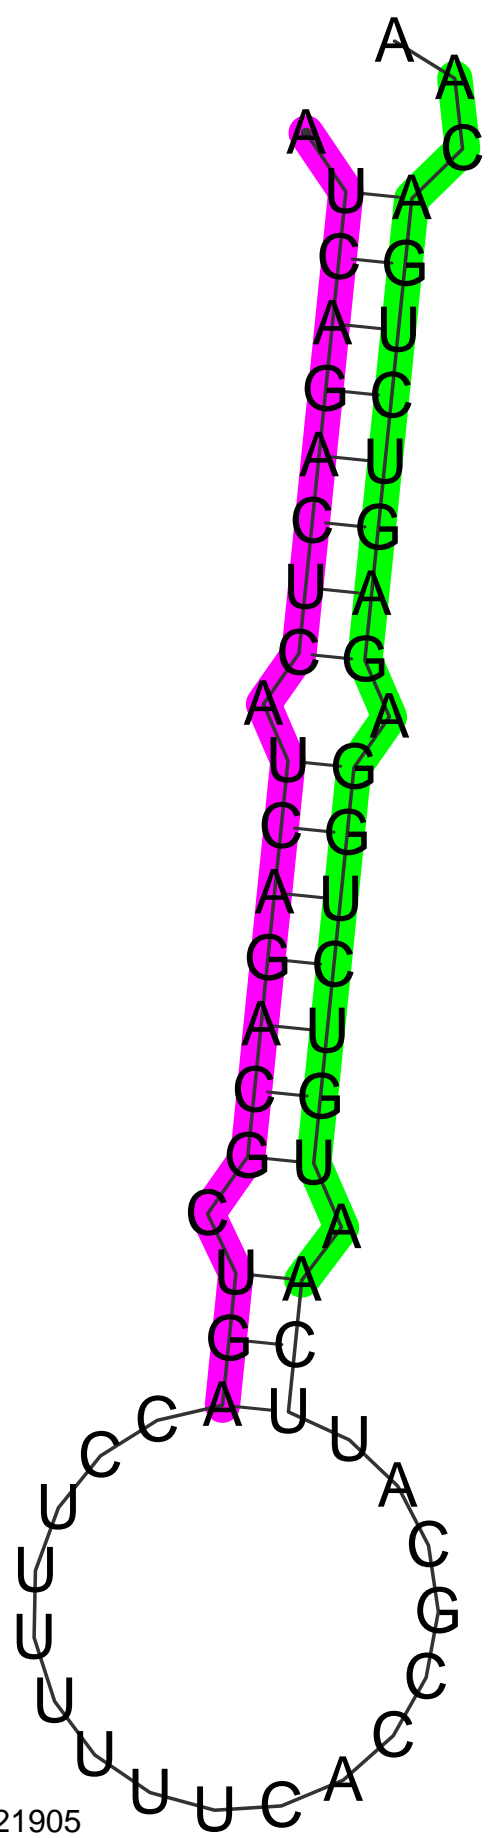



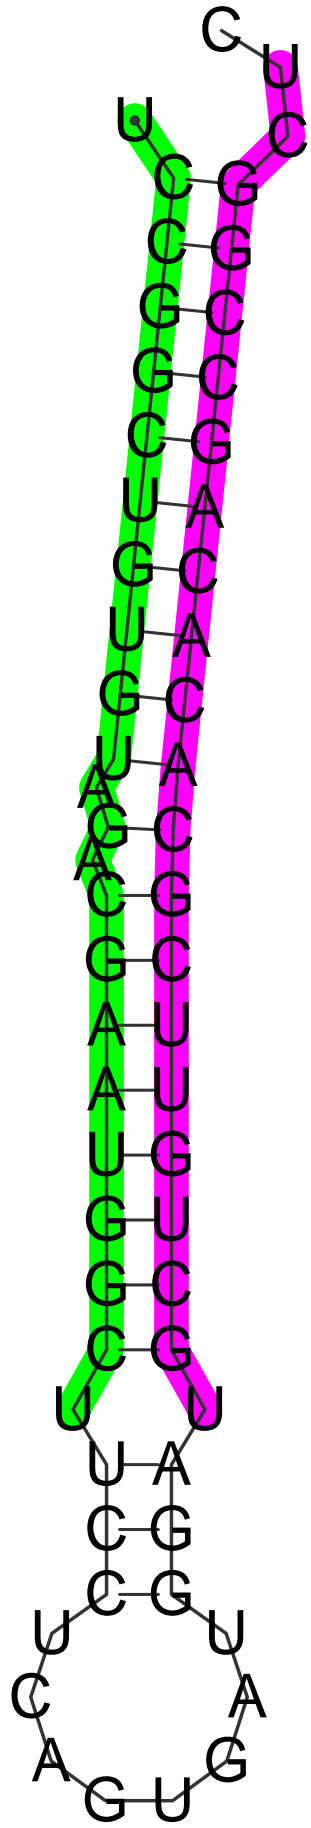



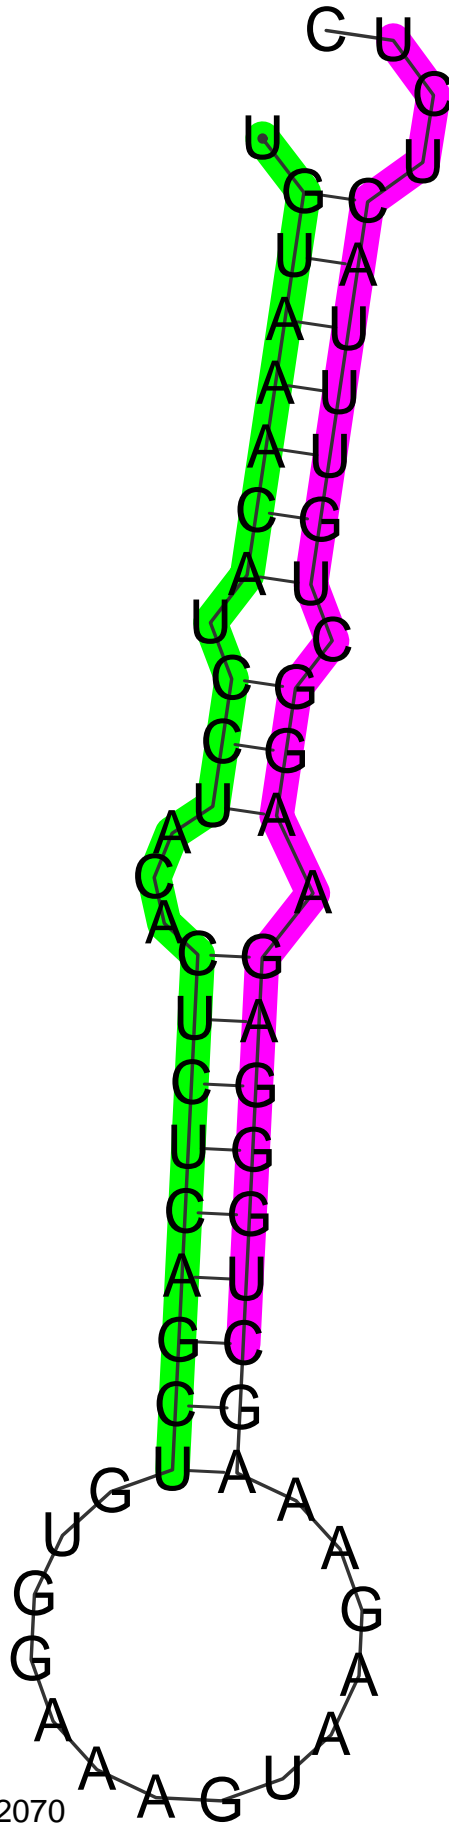



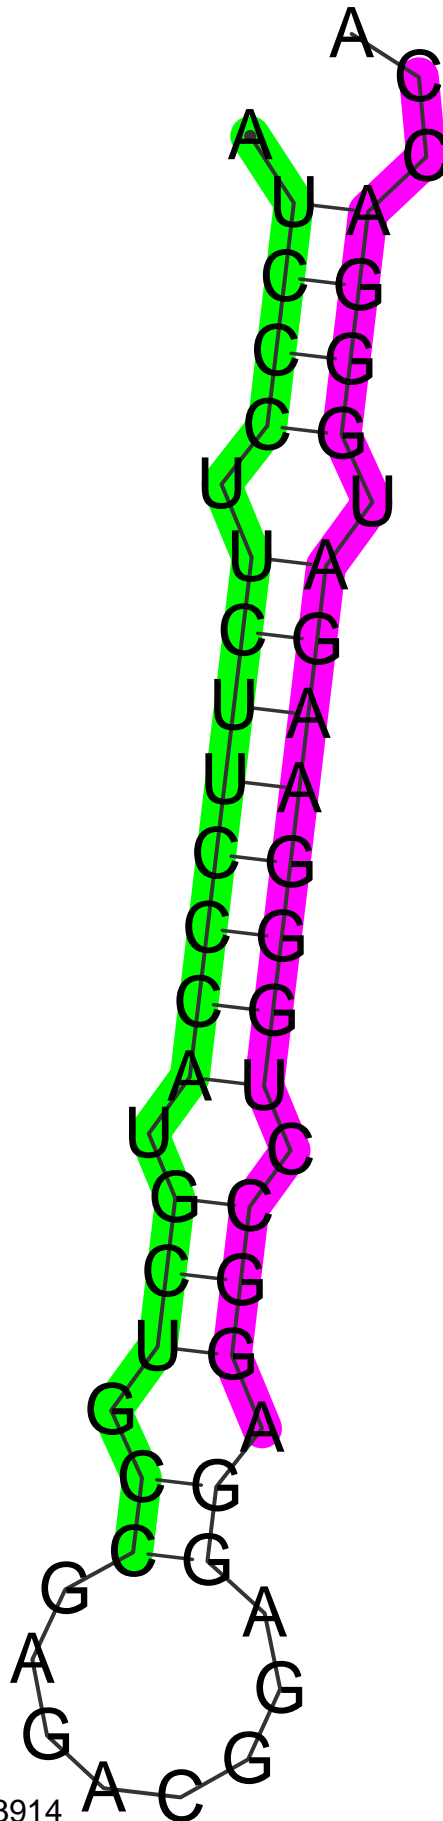

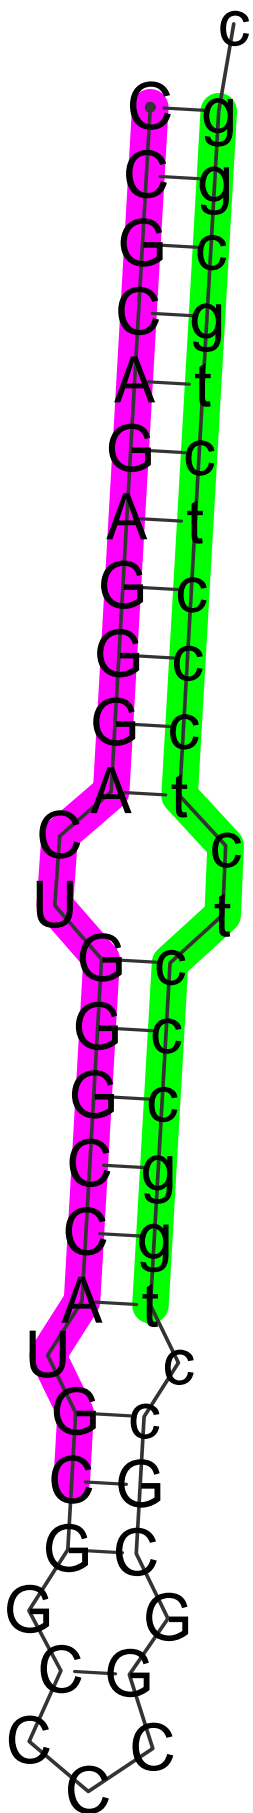

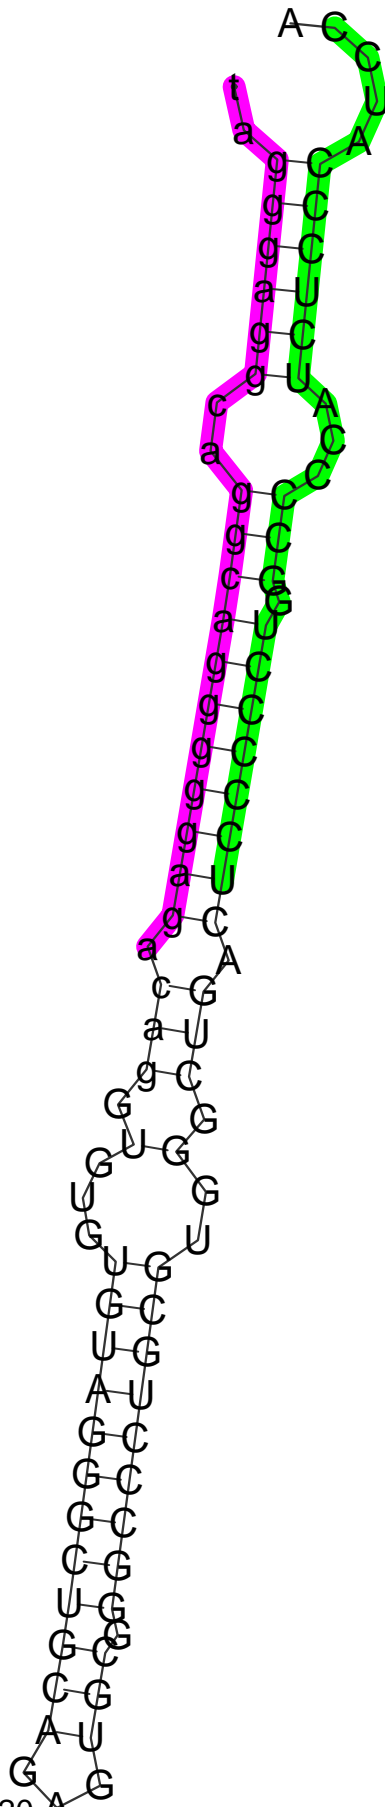

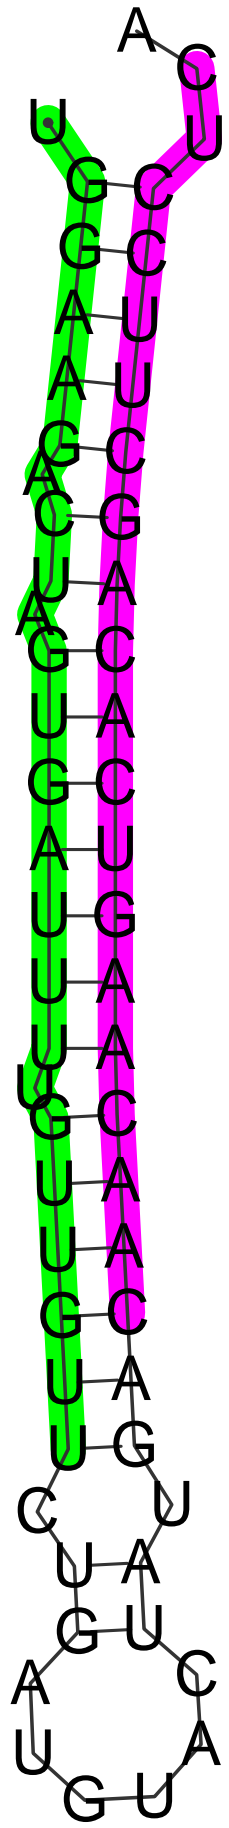



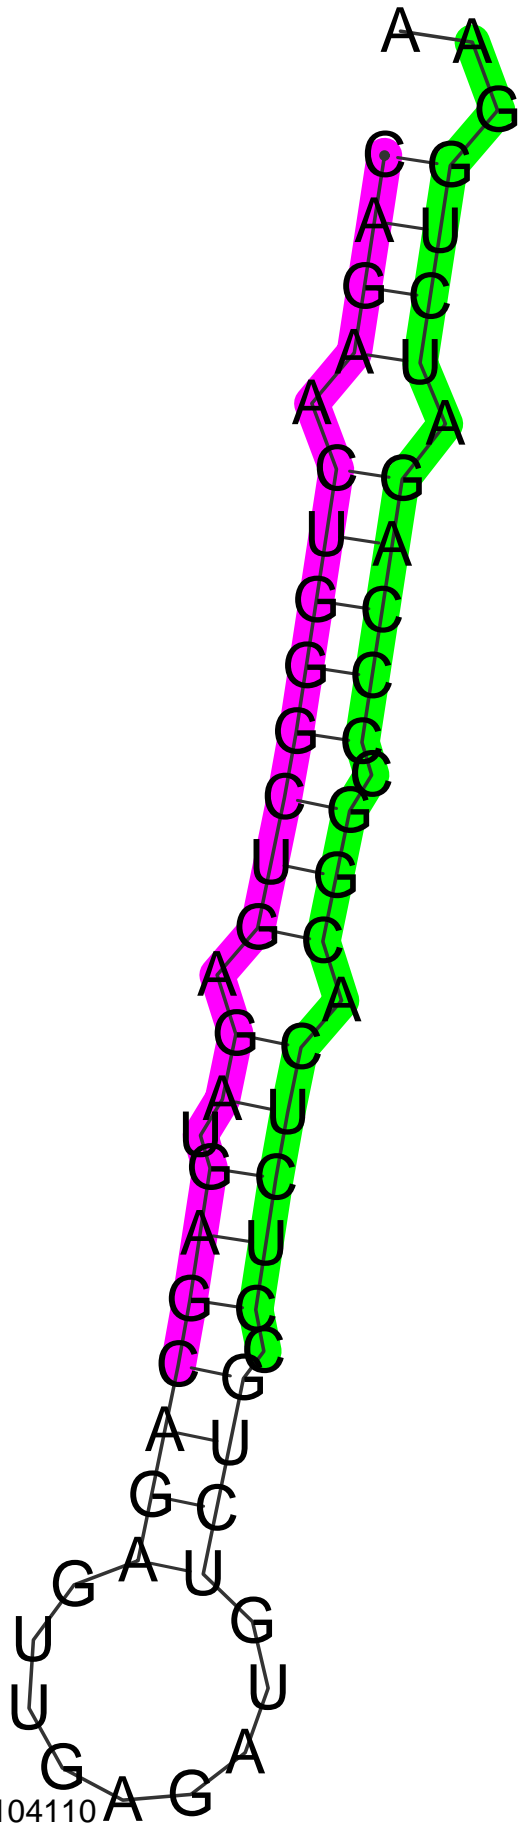



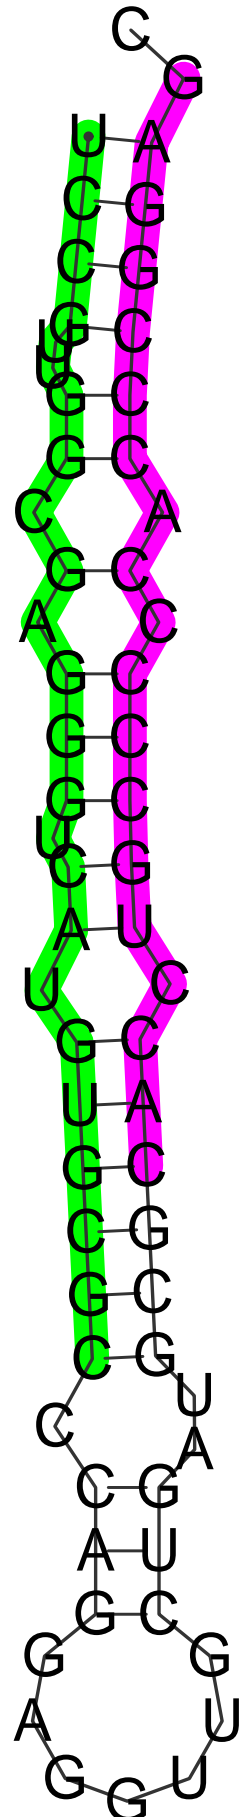





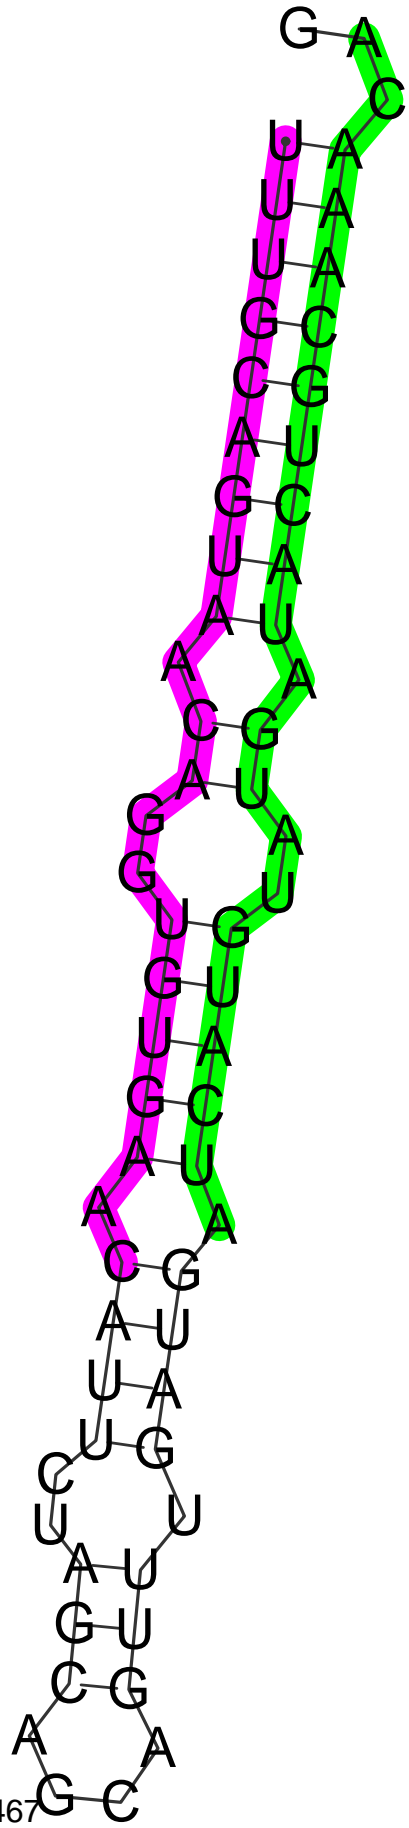

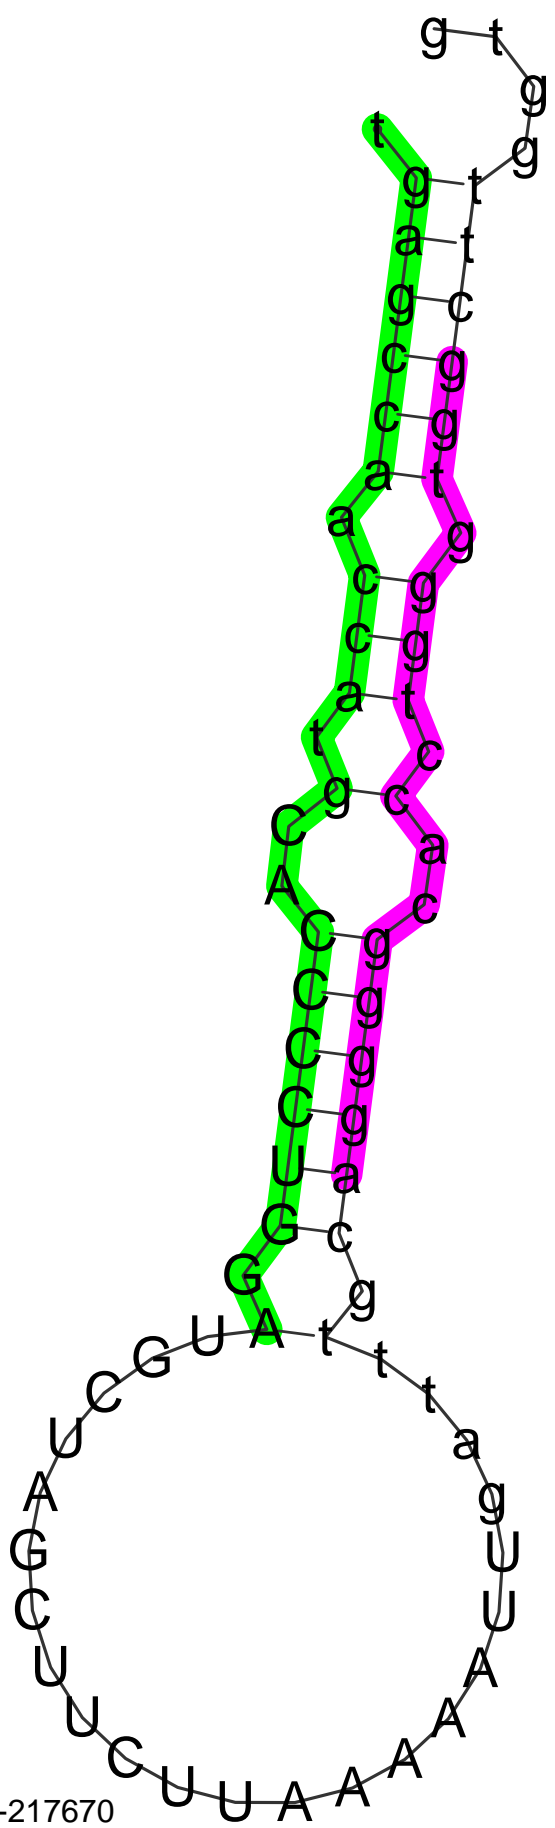

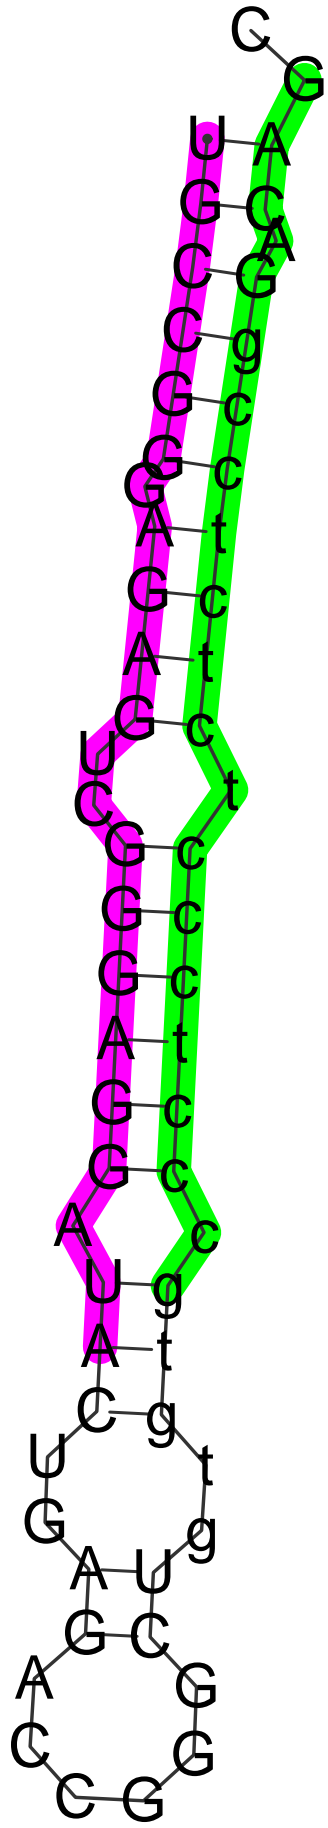



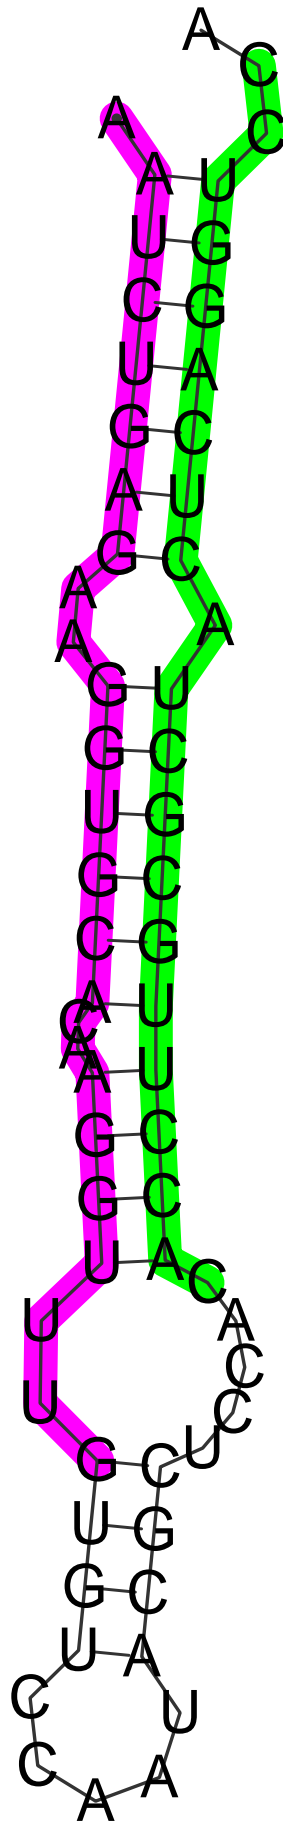



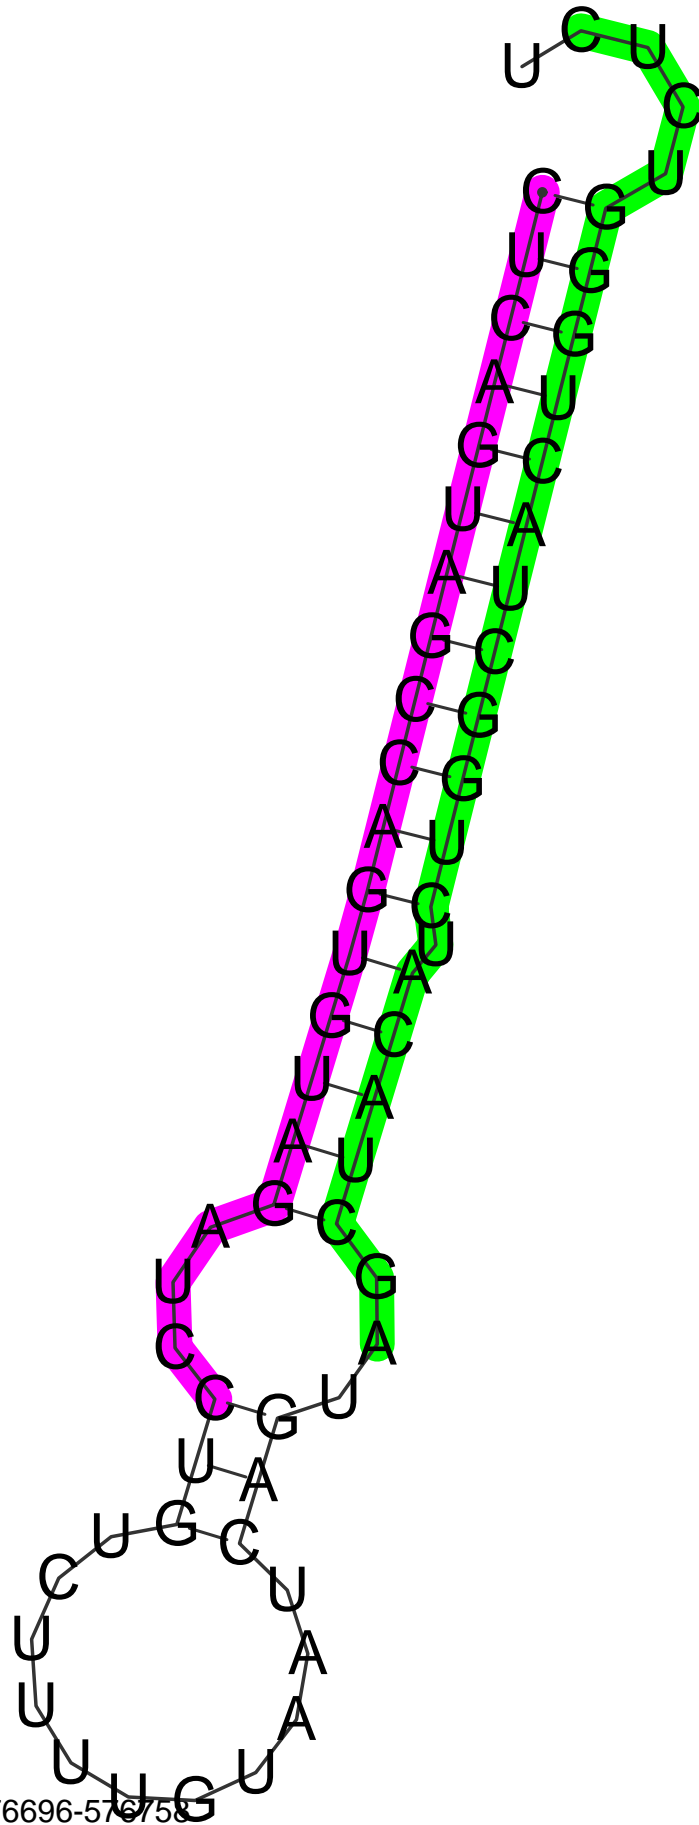



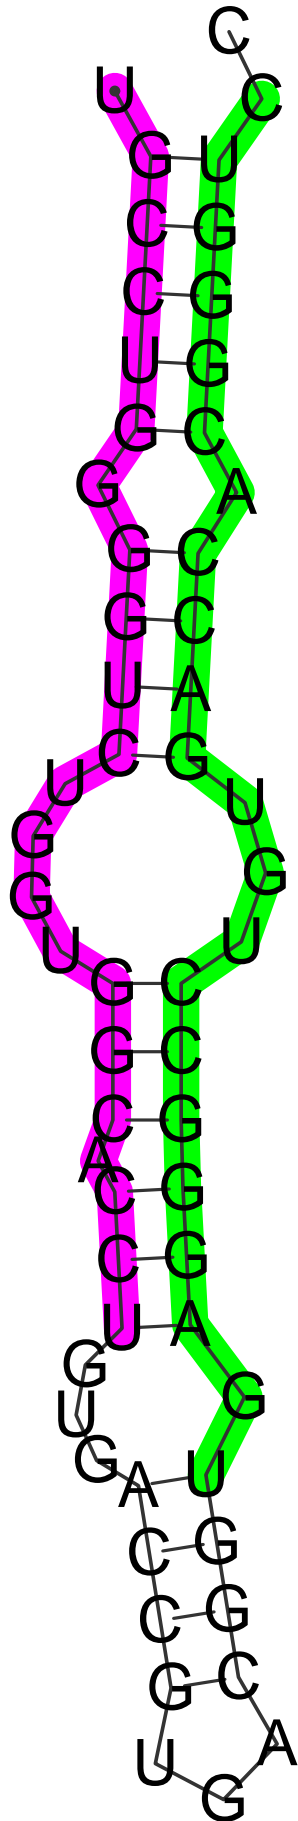

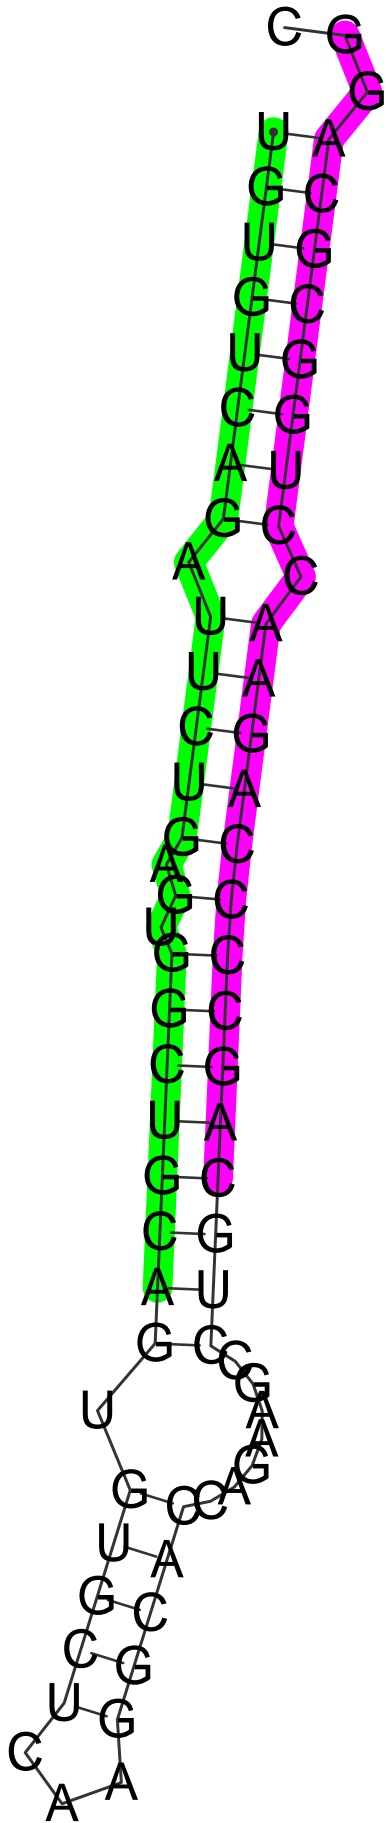

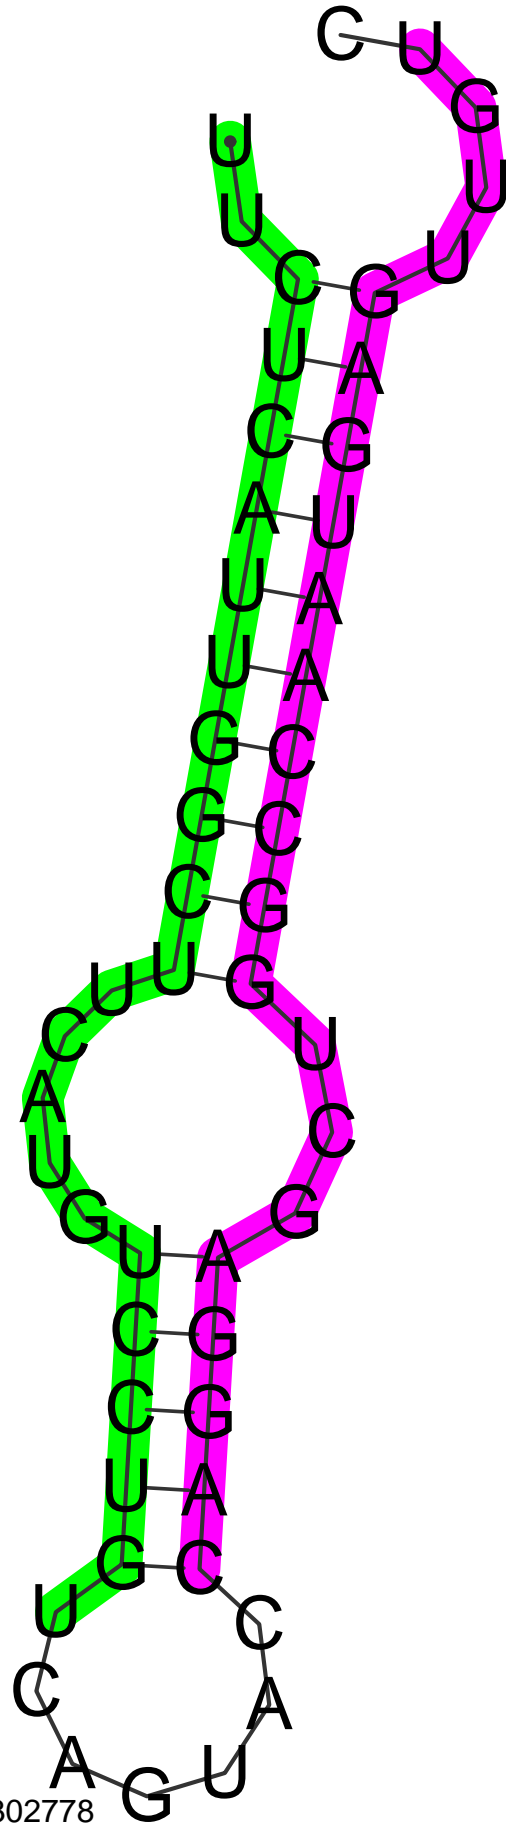

NW\_006384586.1\_302727-302778



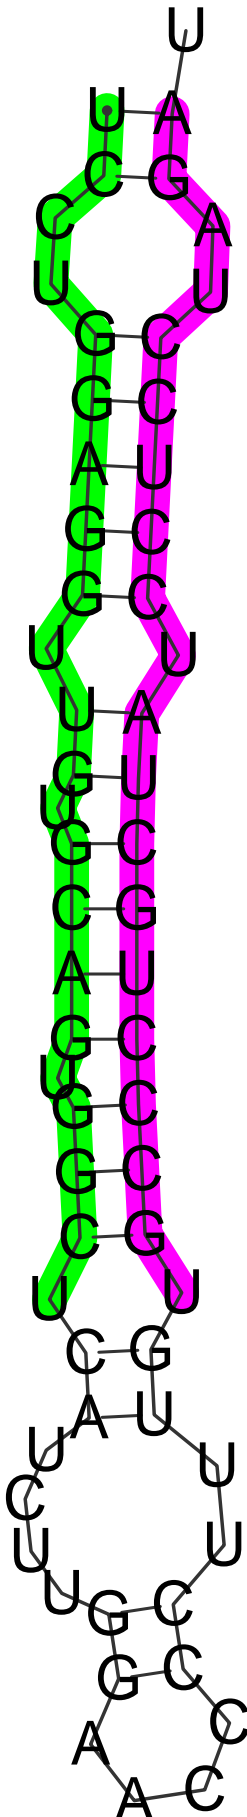

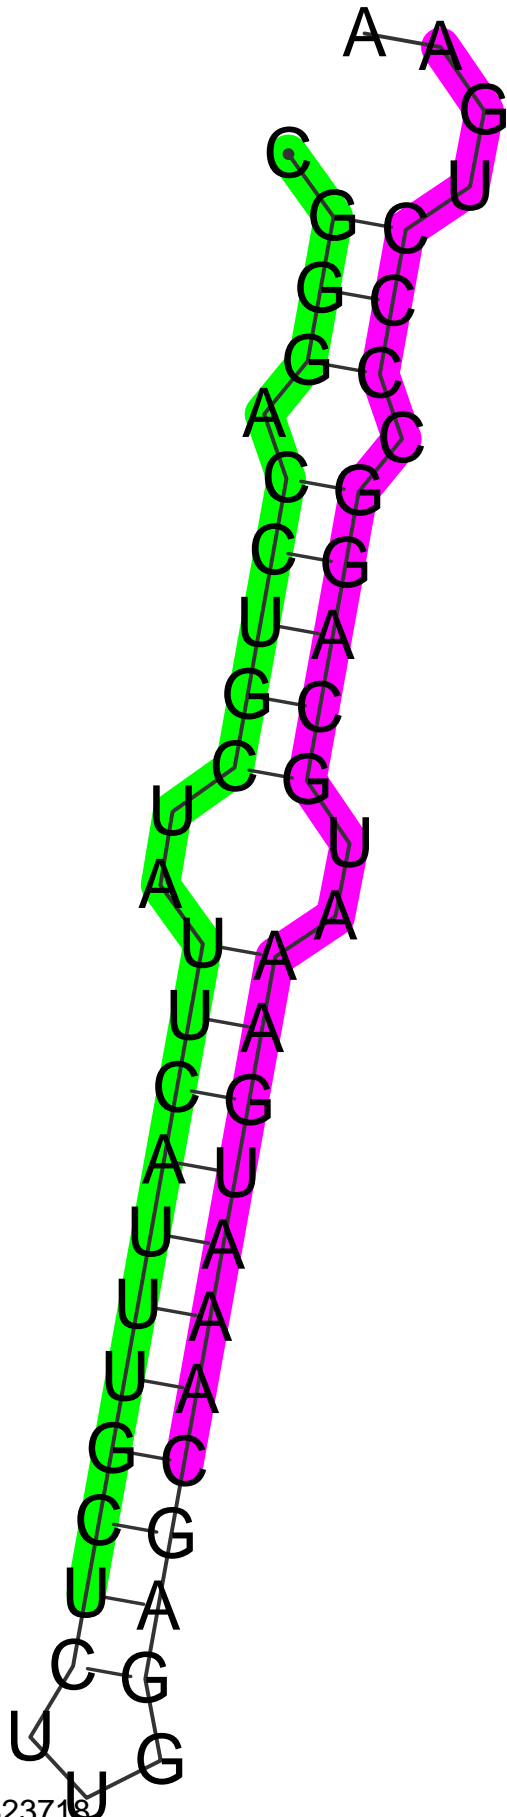



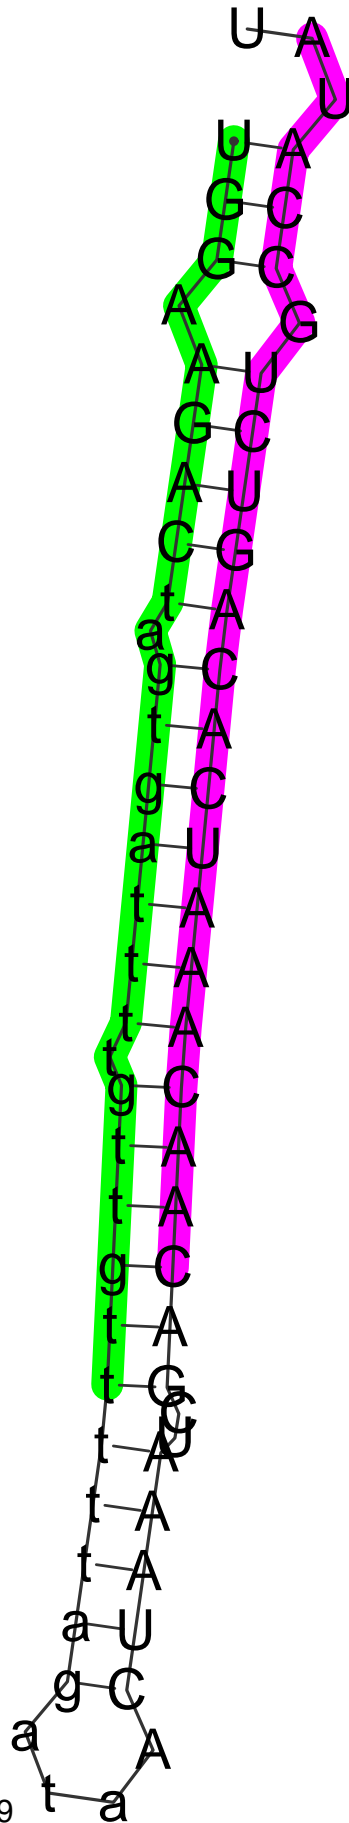





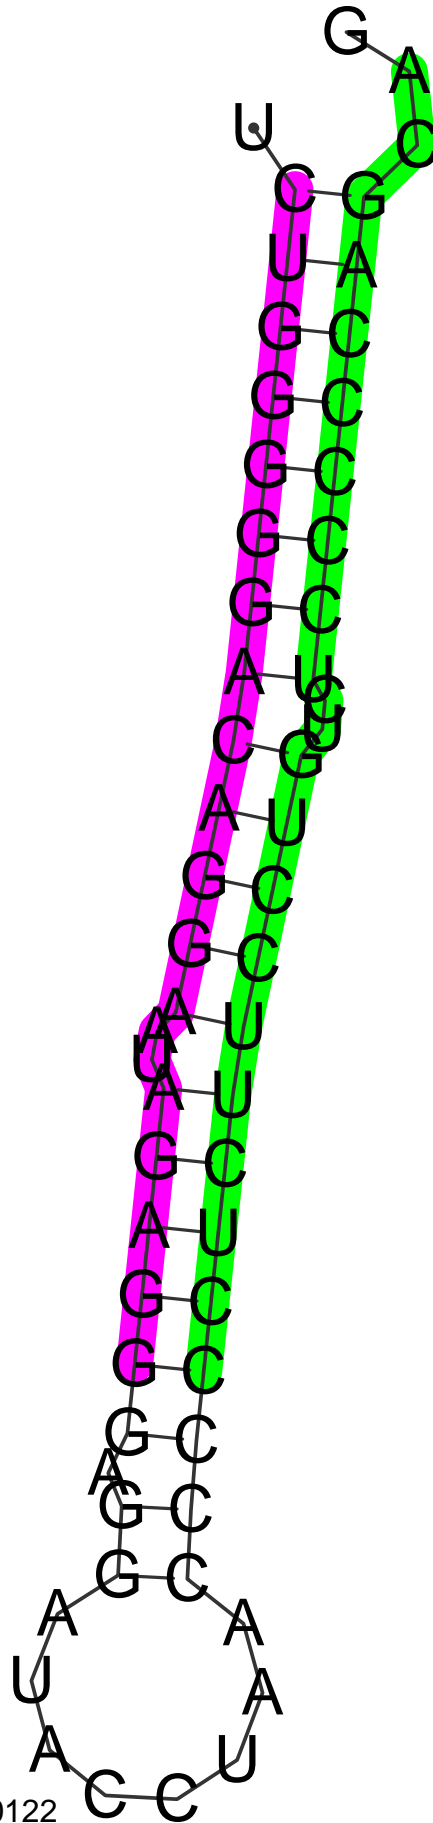

NW\_006384946.1\_440064-440122



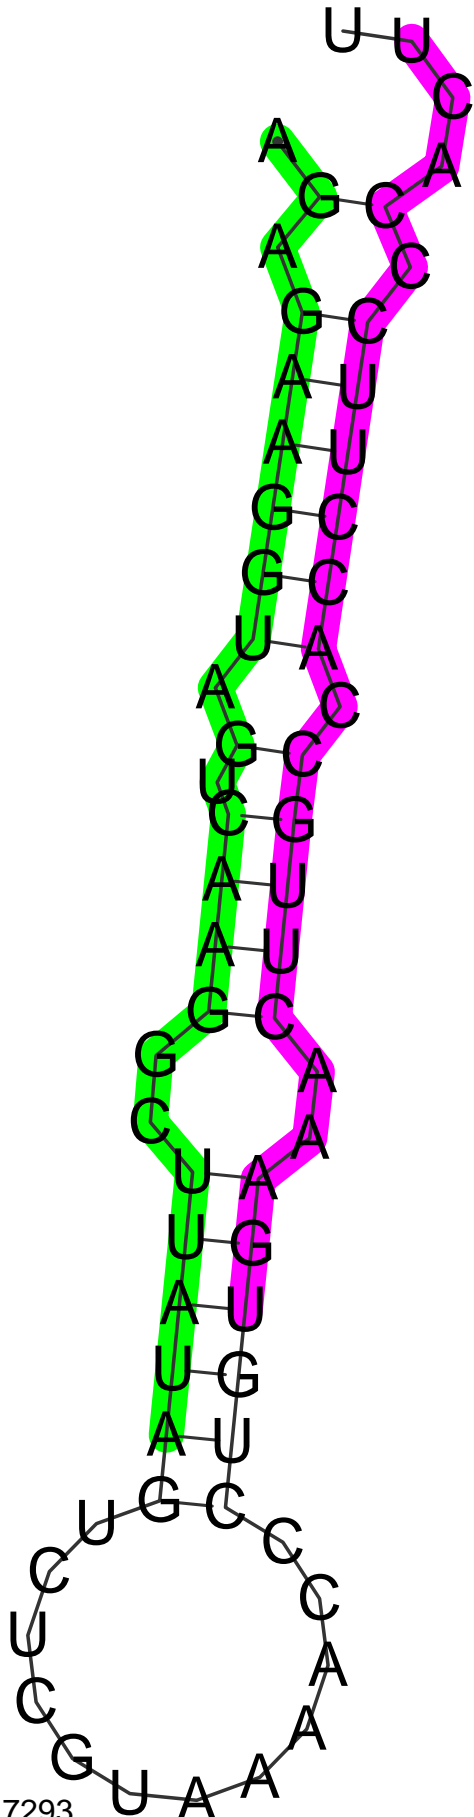



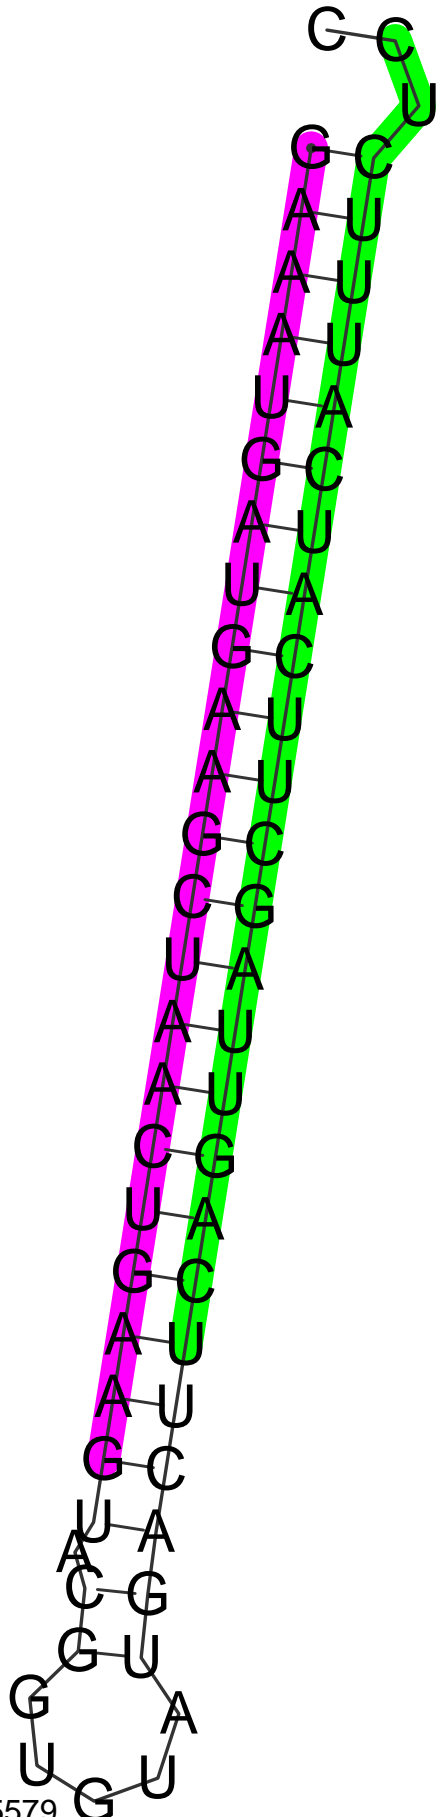

NW\_006385011.1\_45521-45579

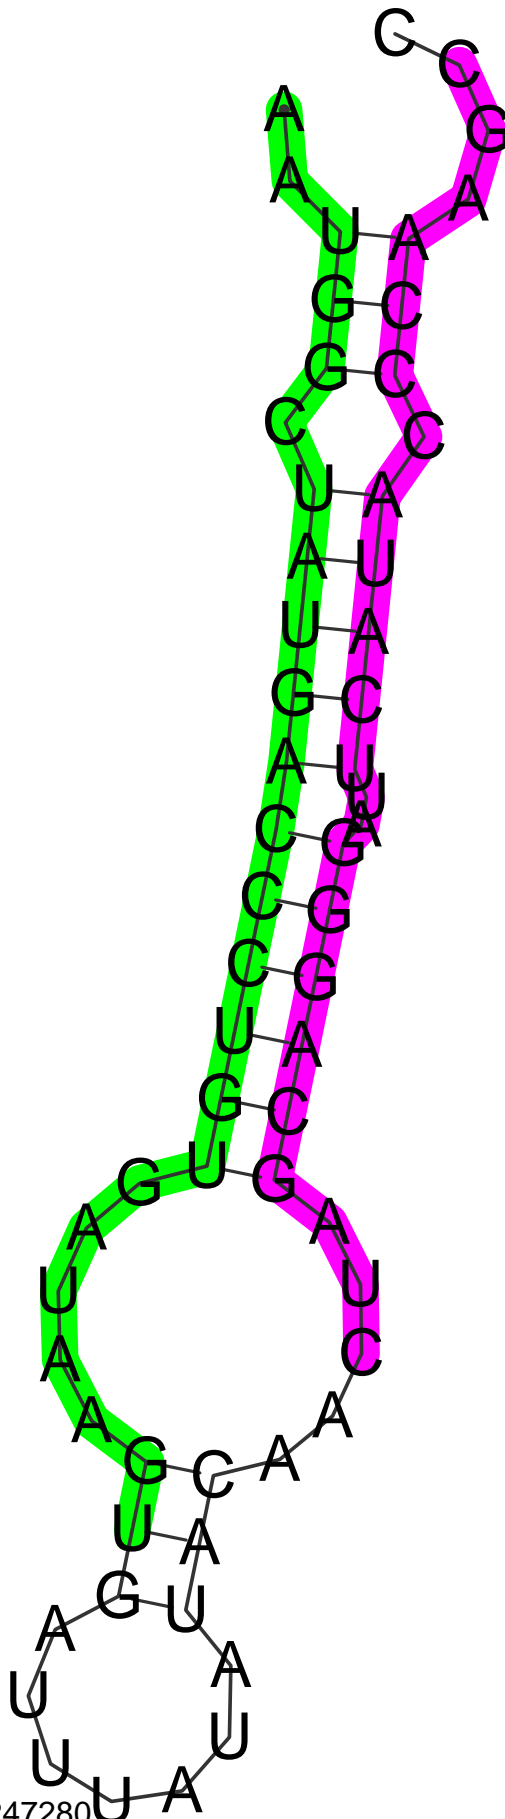

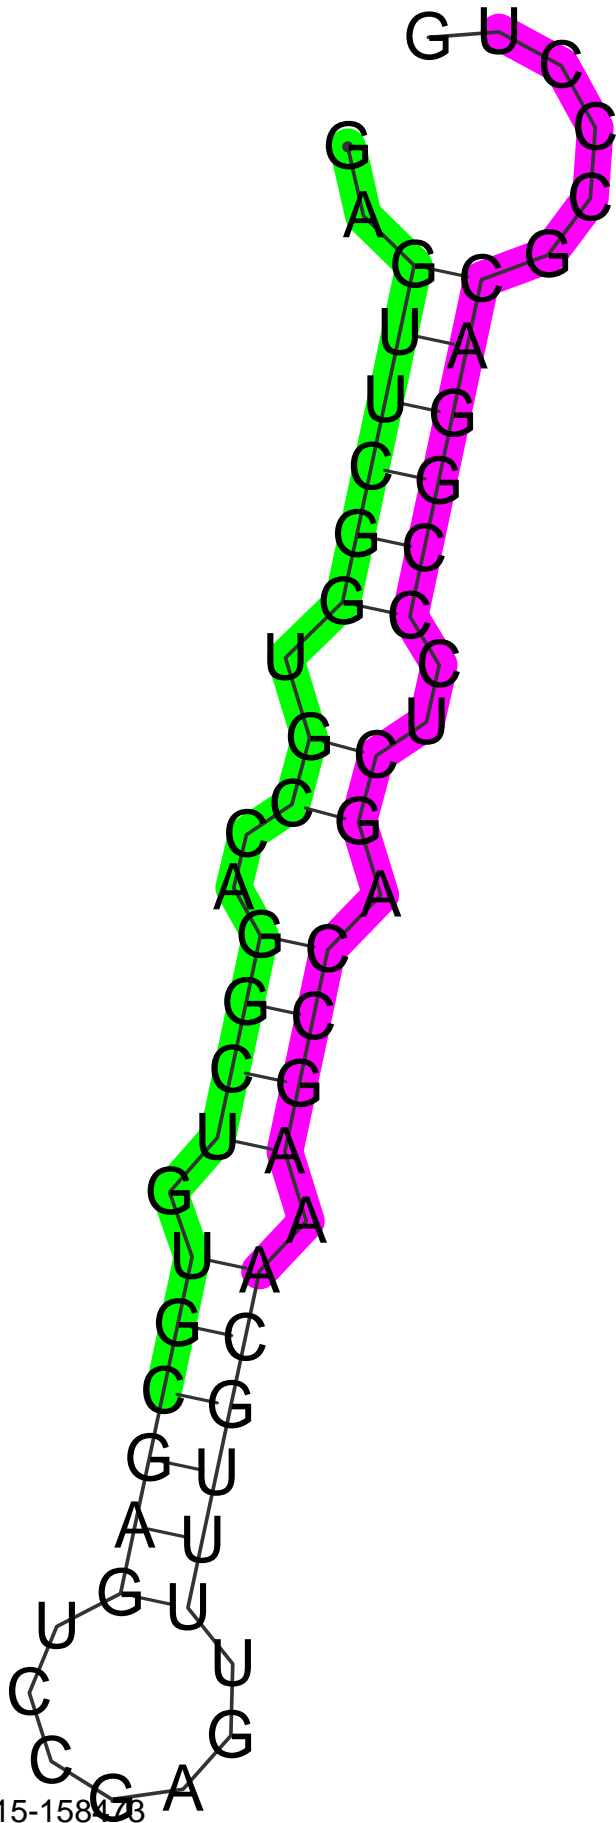







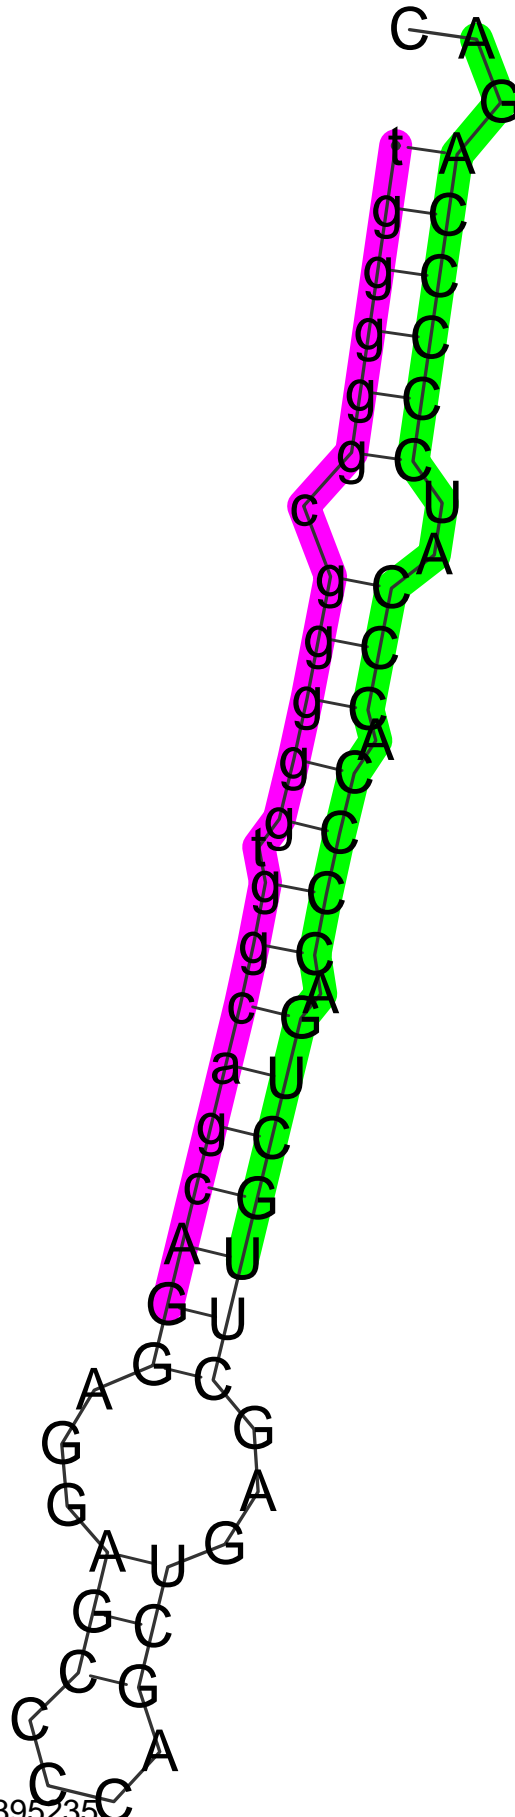



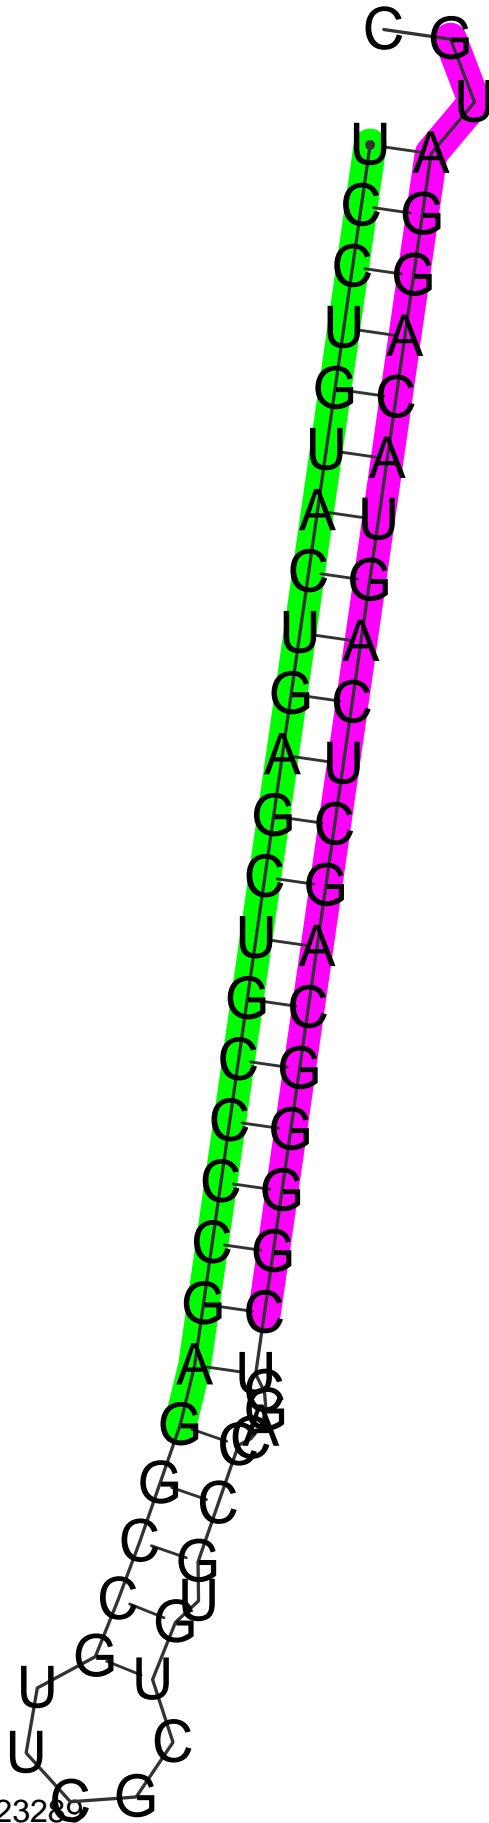

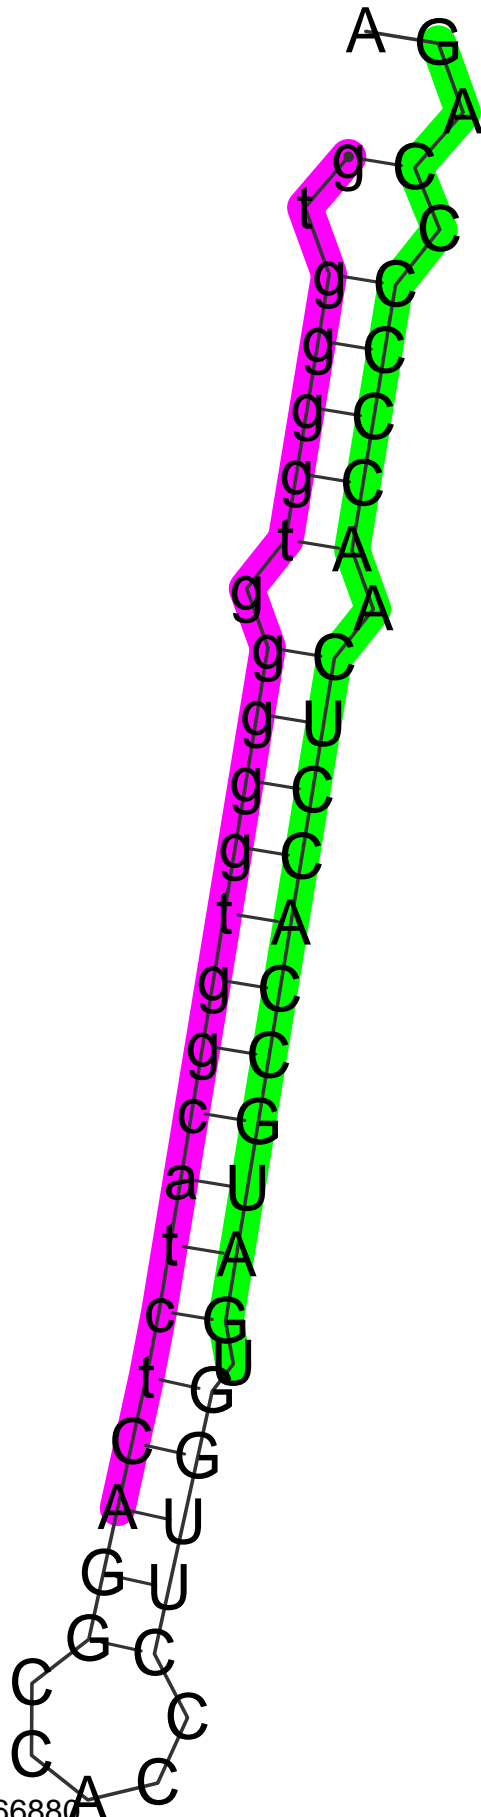

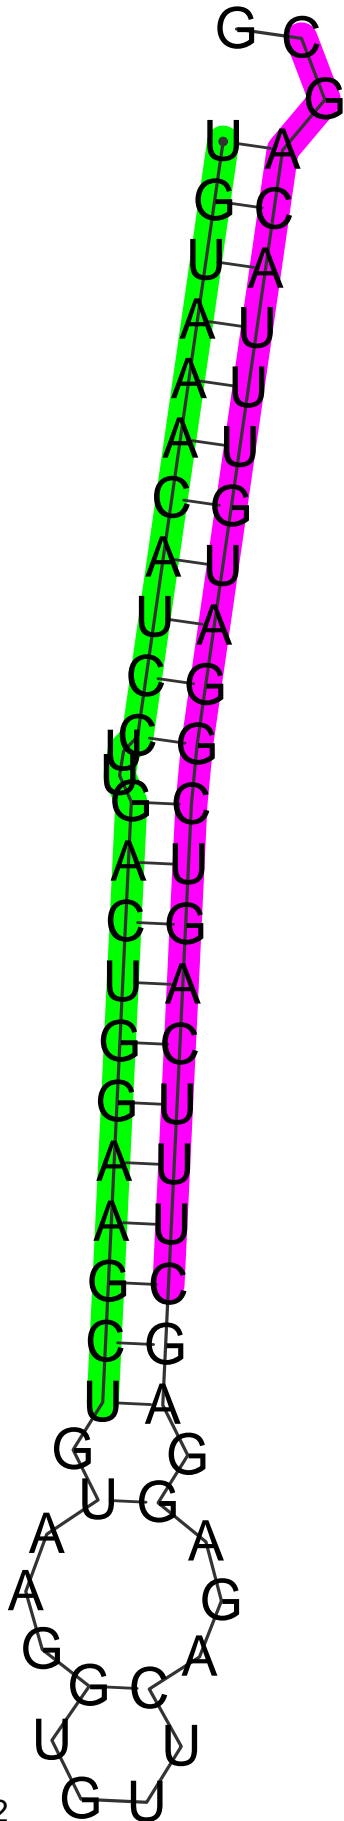

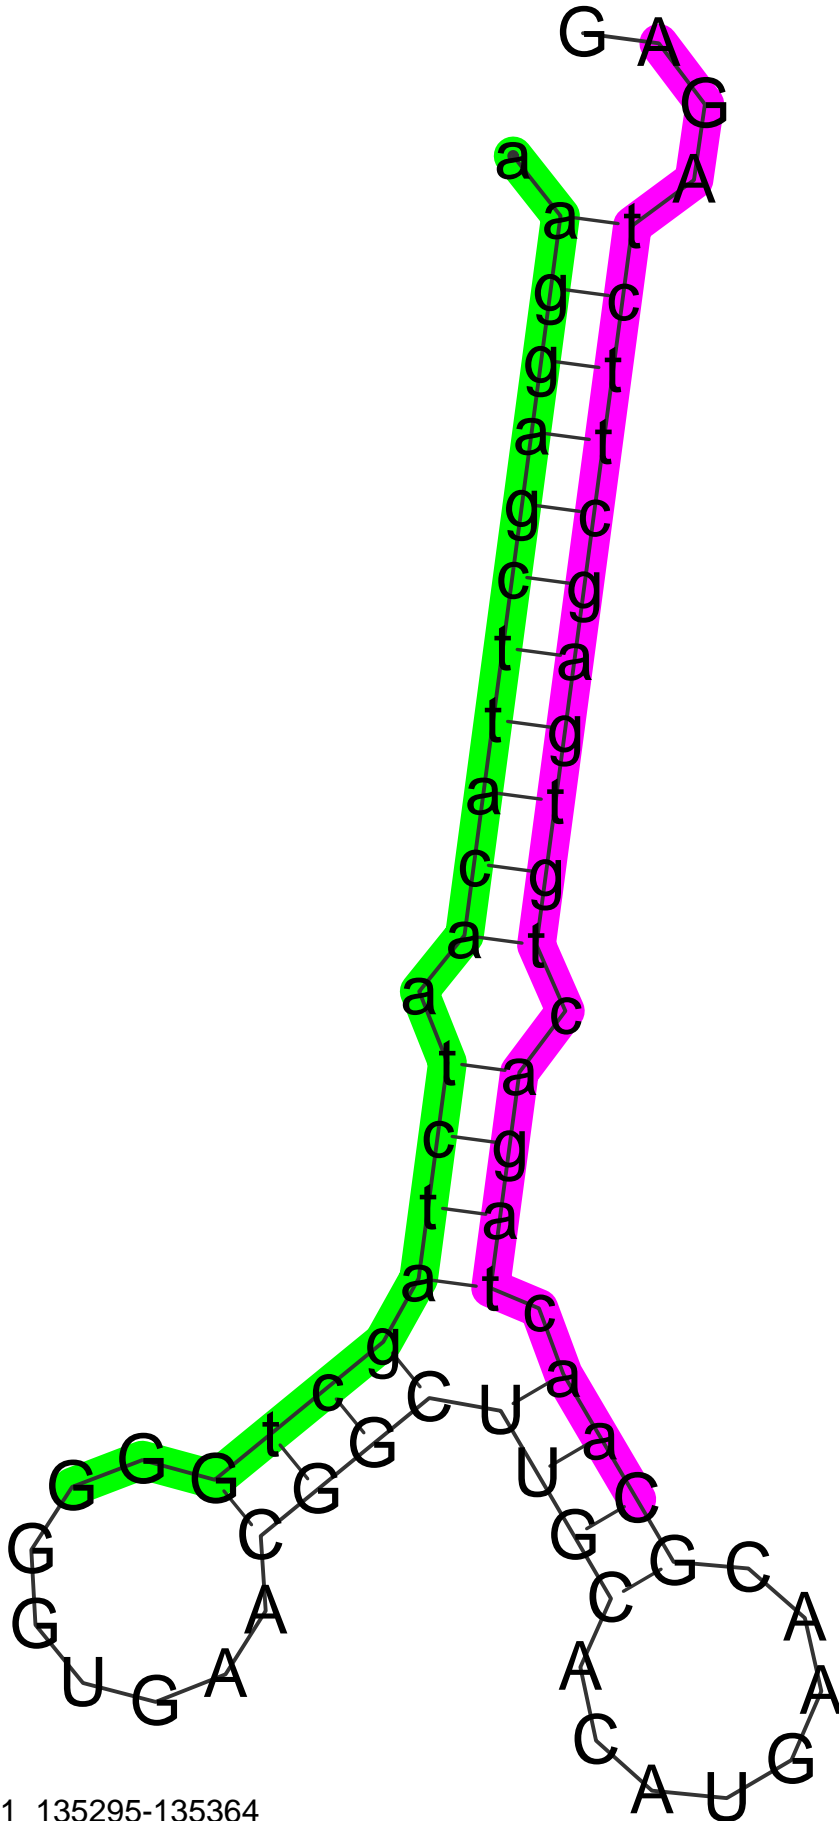

NW\_006385537.1\_135295-135364











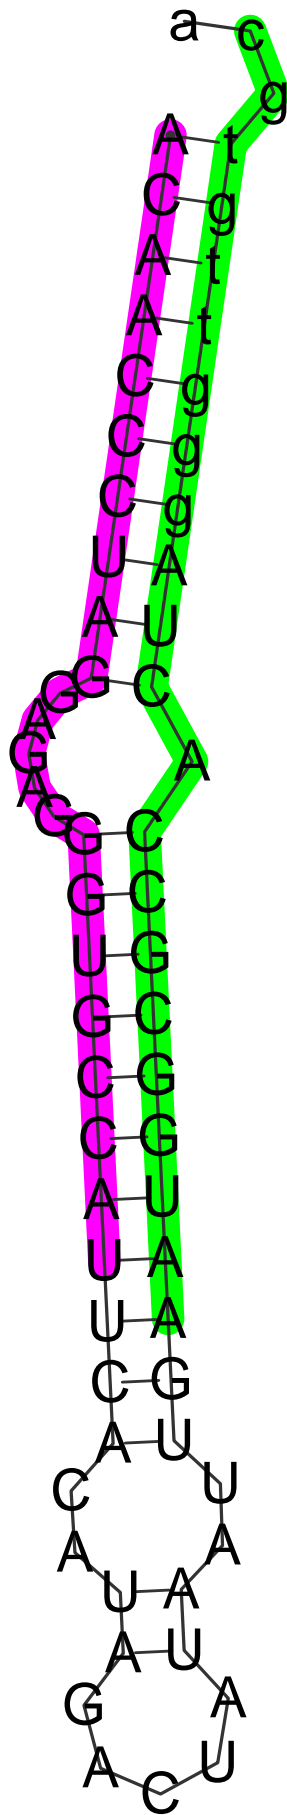

NW\_006385734.1\_152833-152896



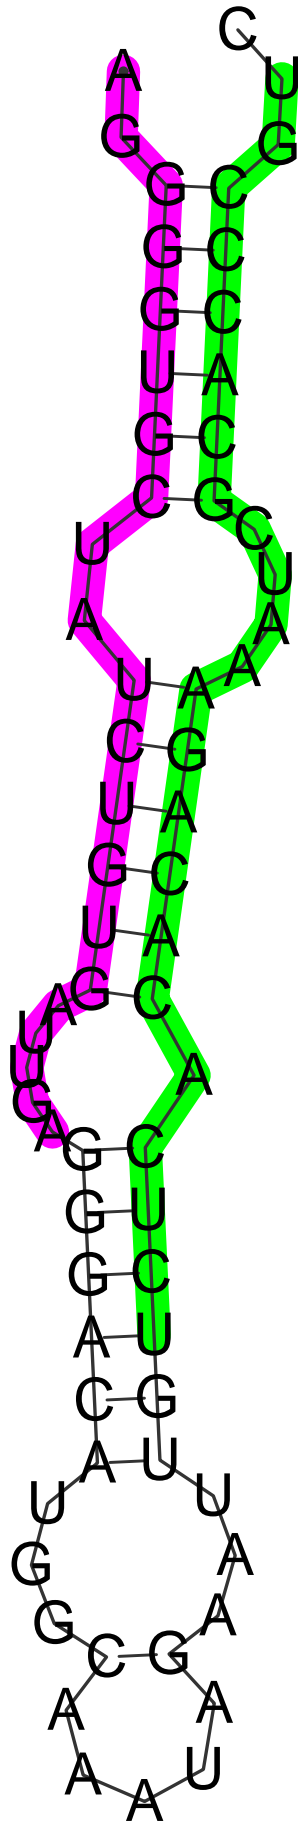

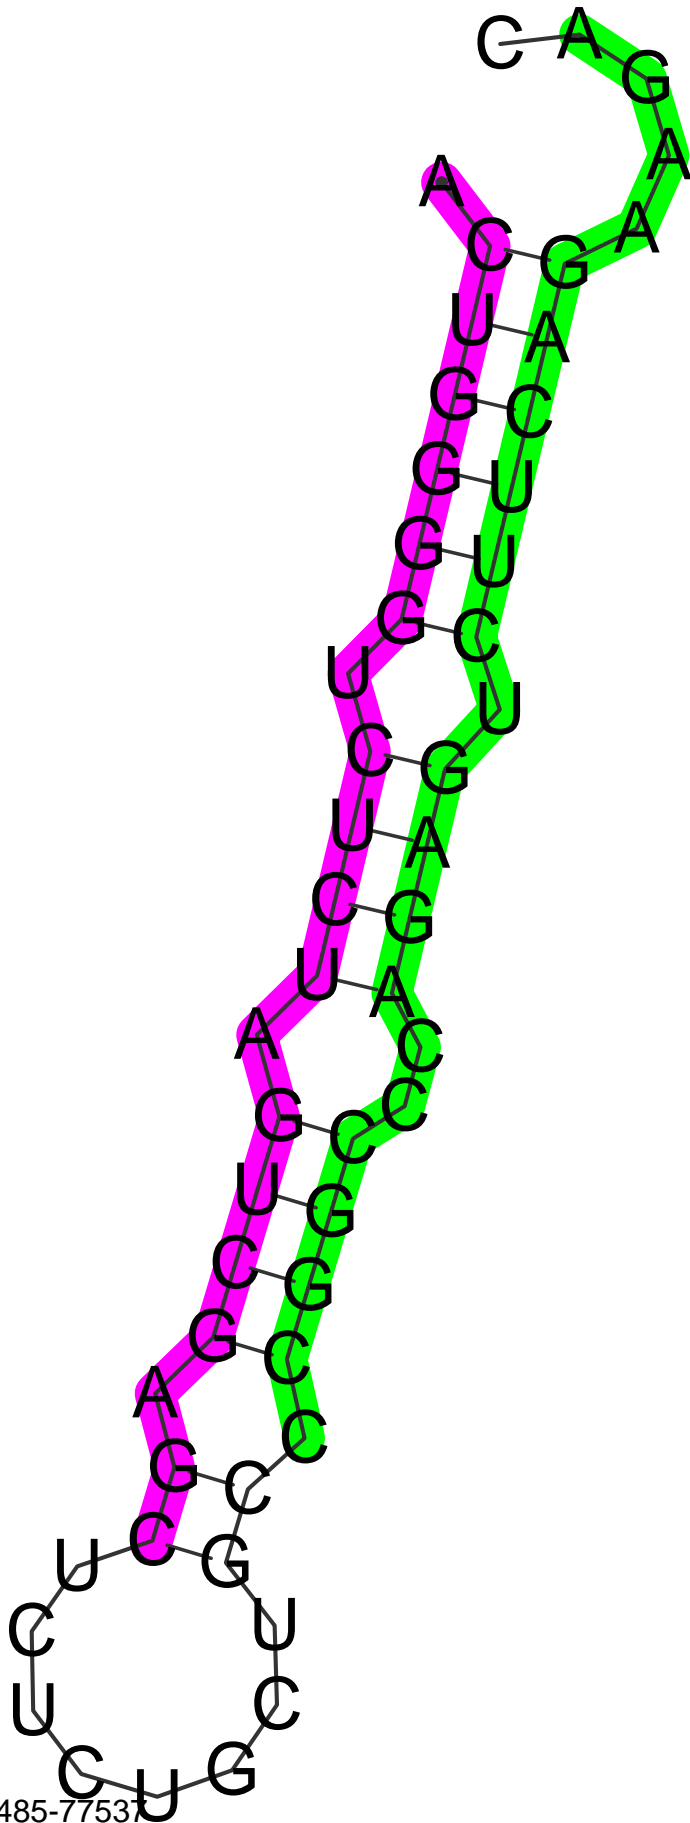



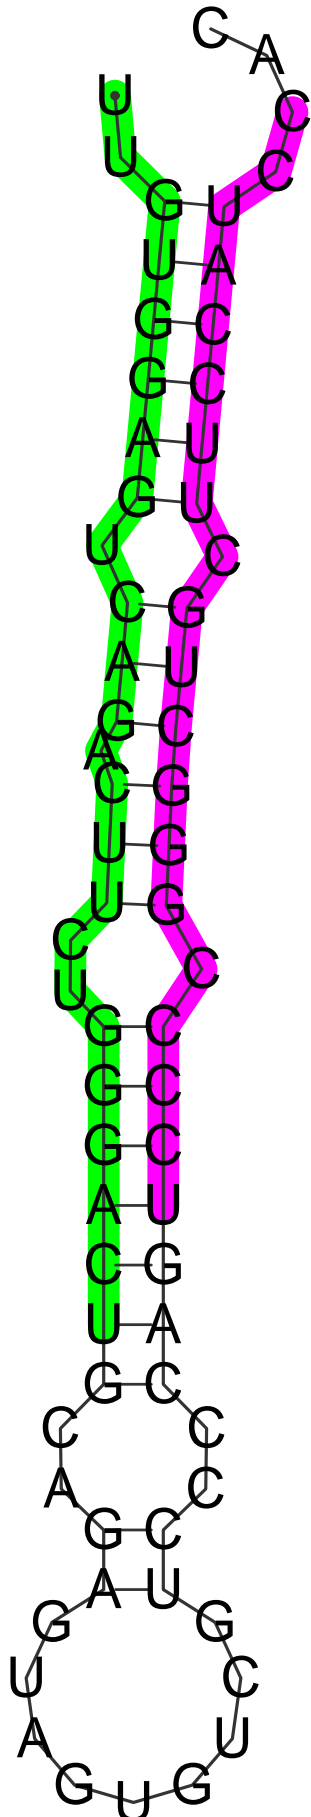

NW\_006385878.1\_280194-280260

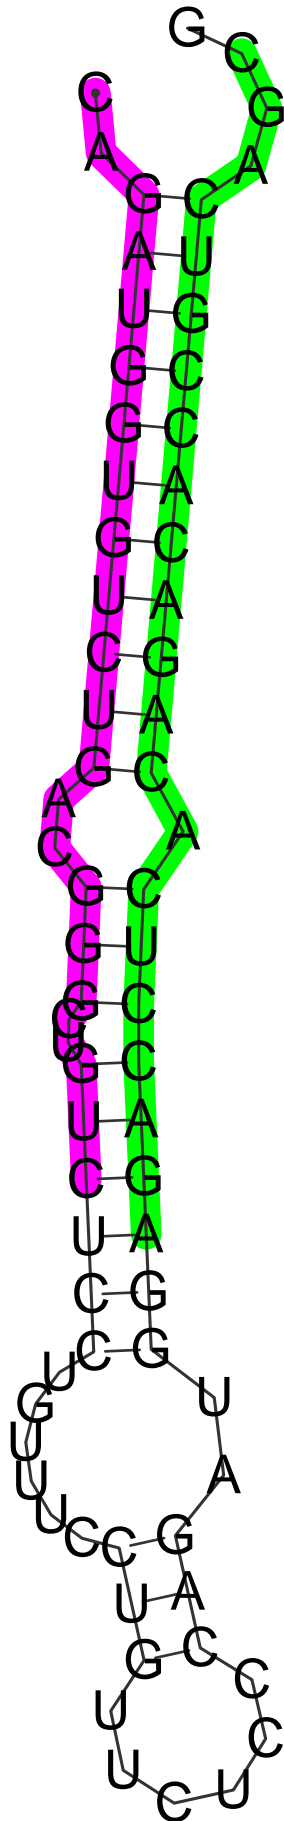

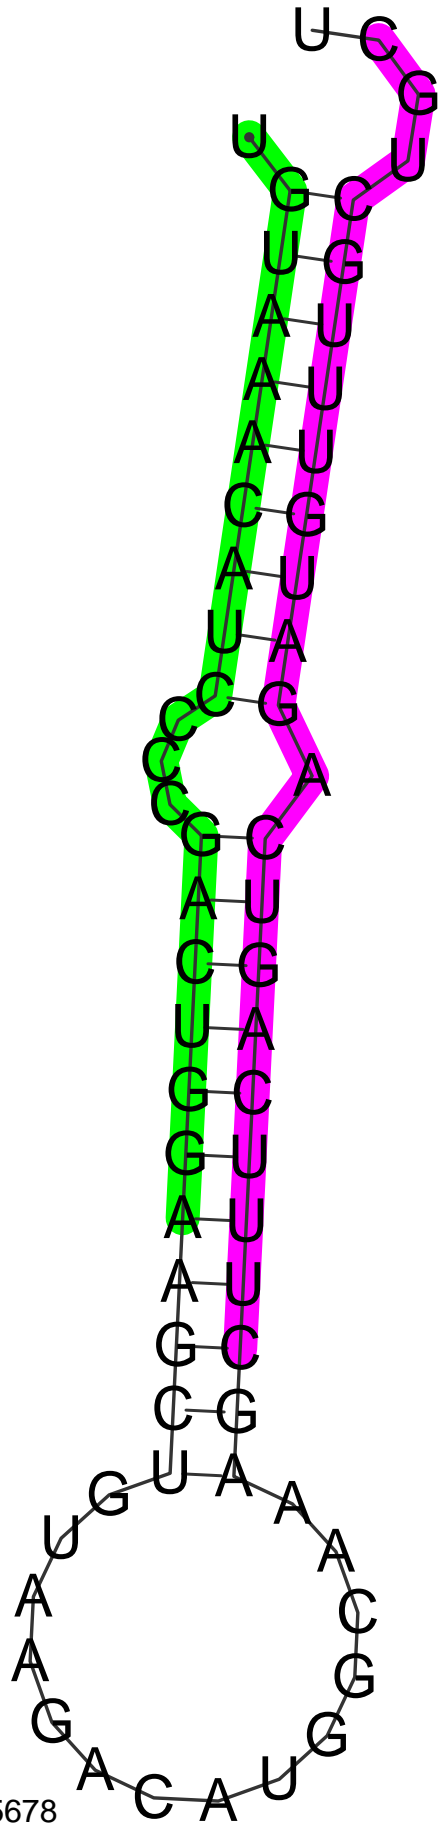

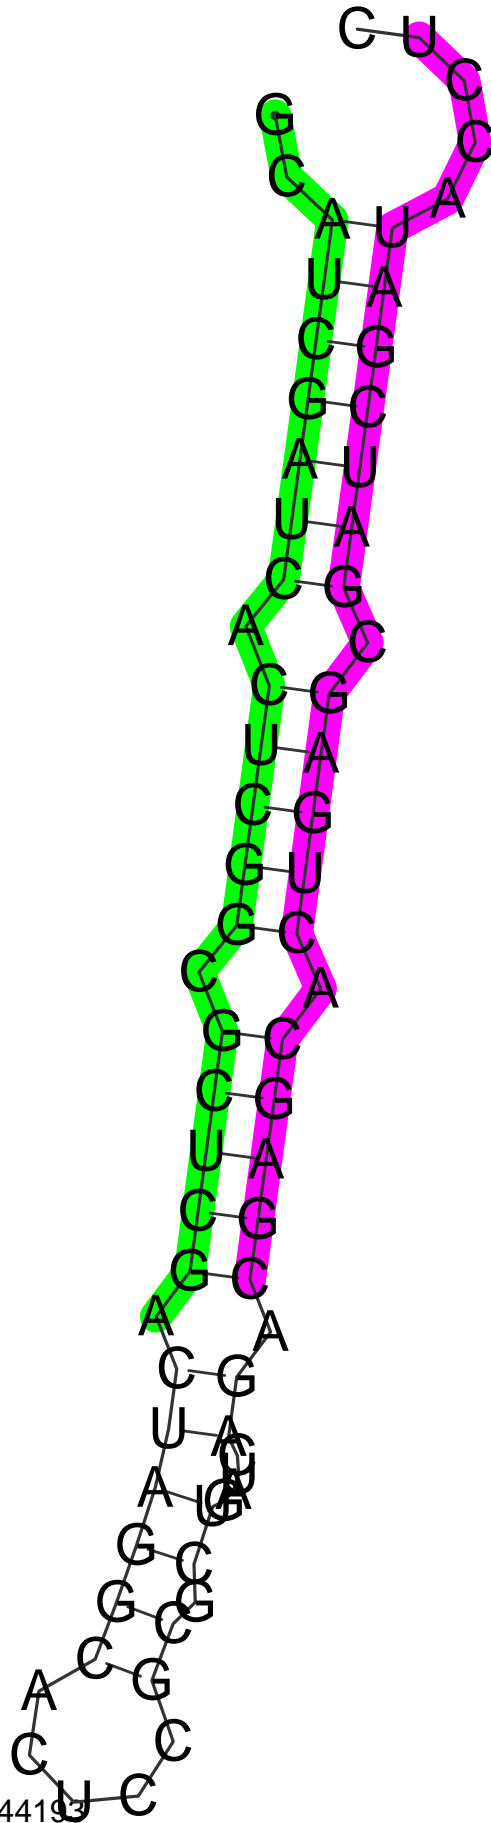

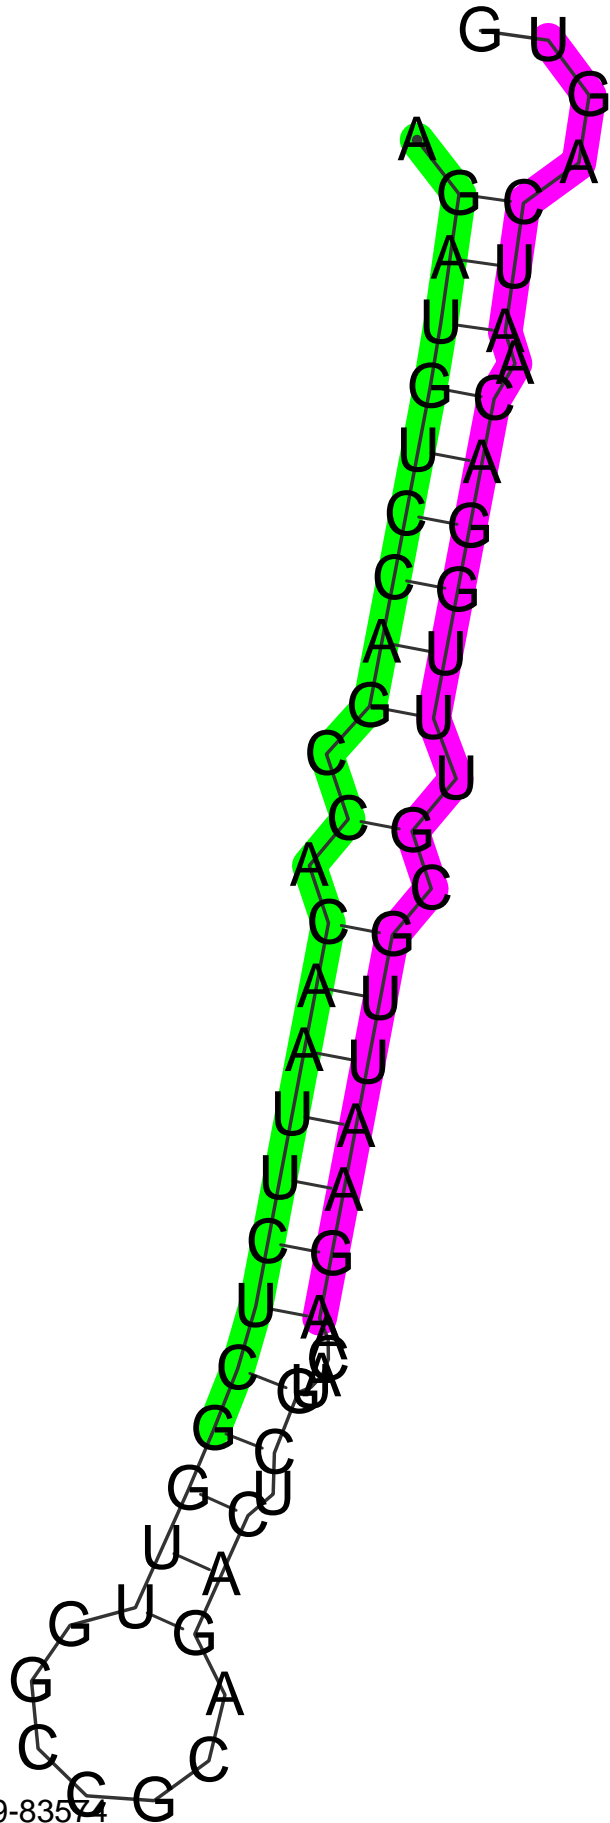



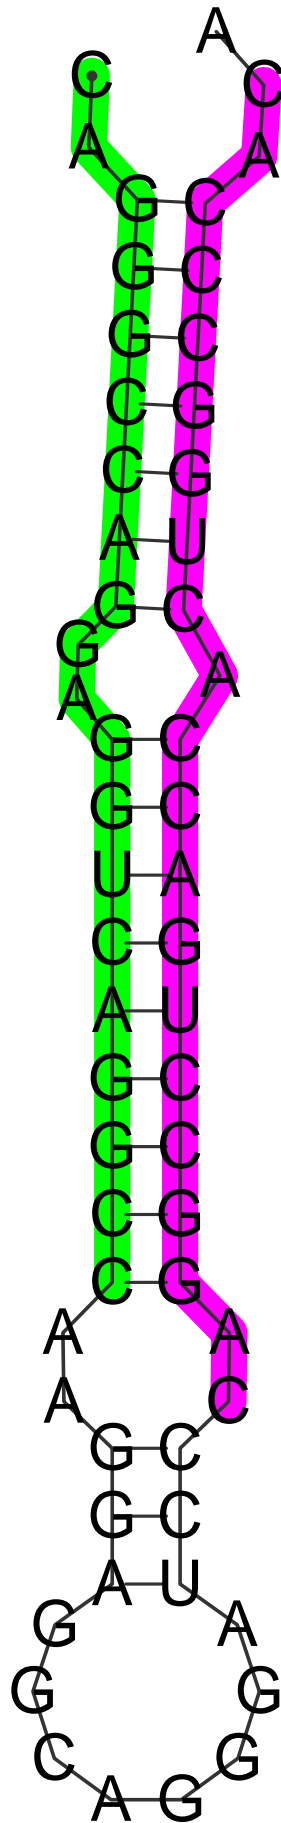

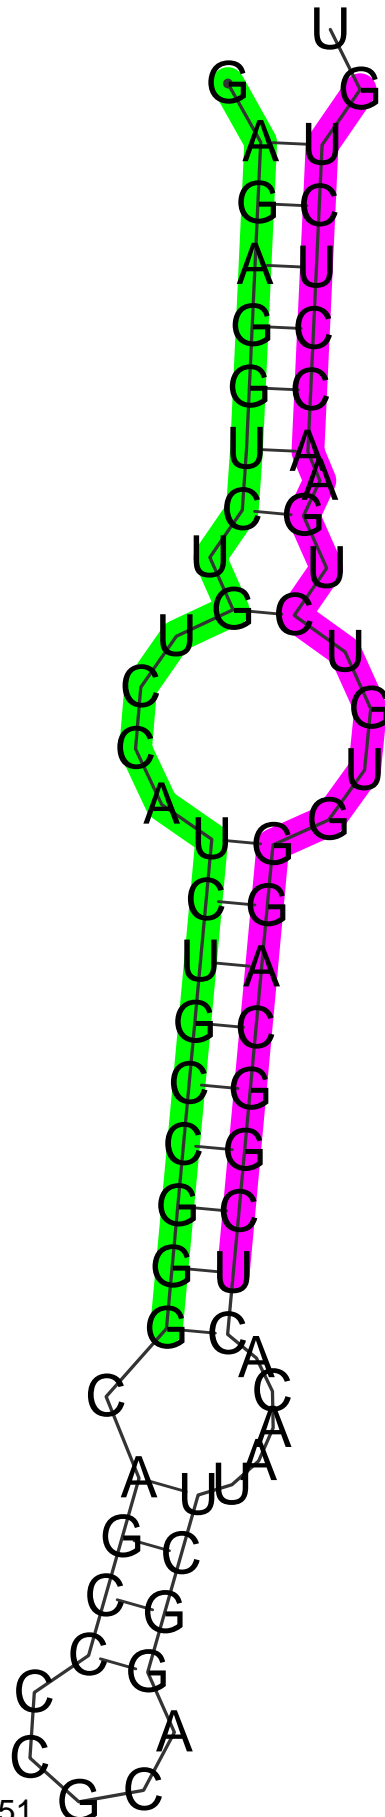



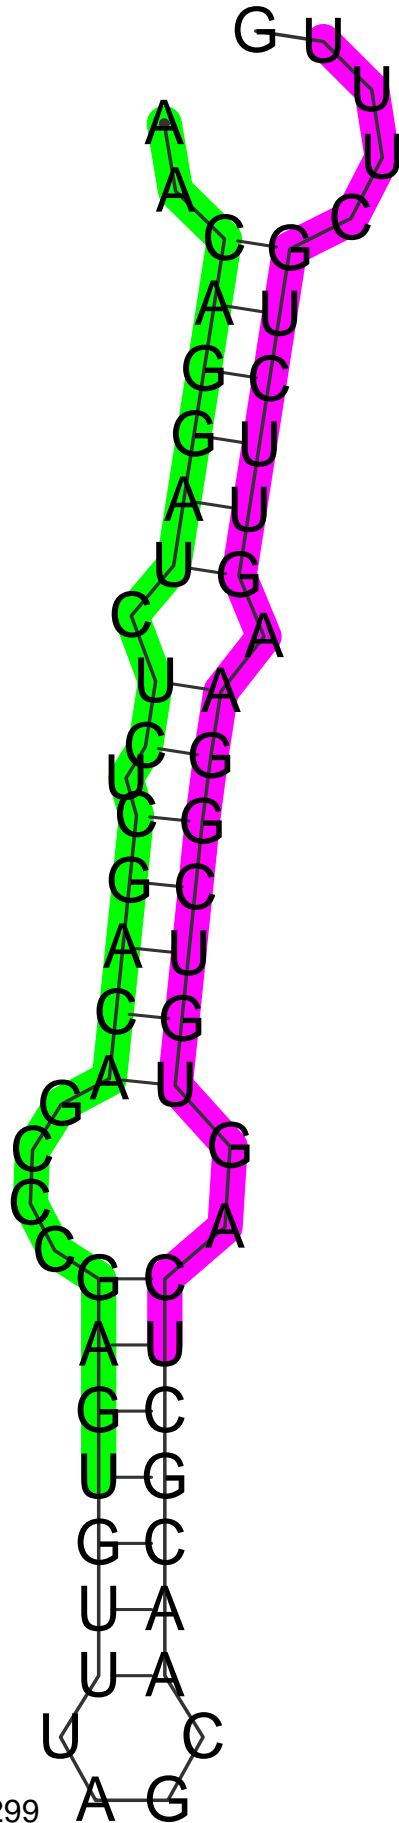

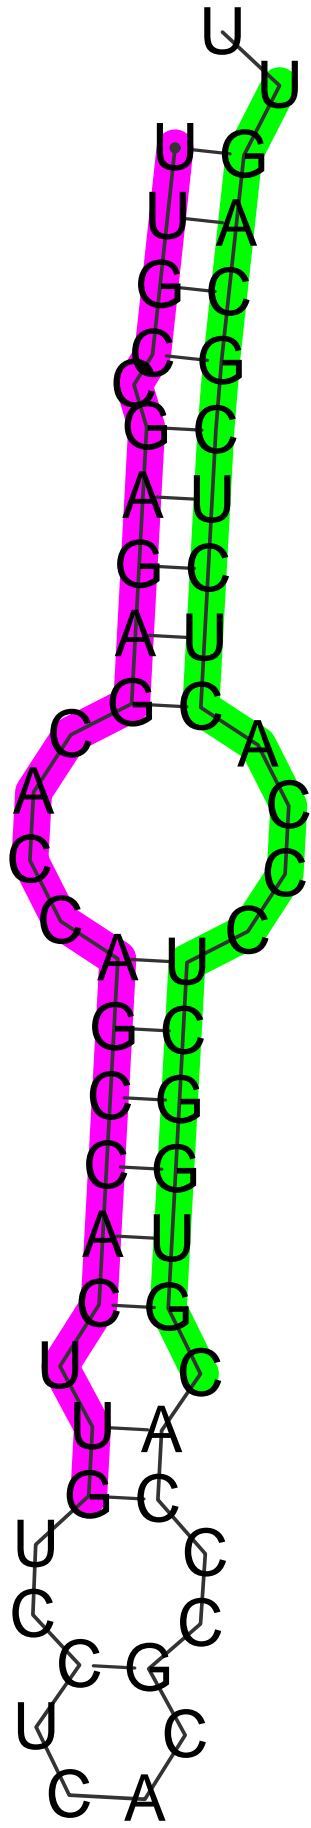

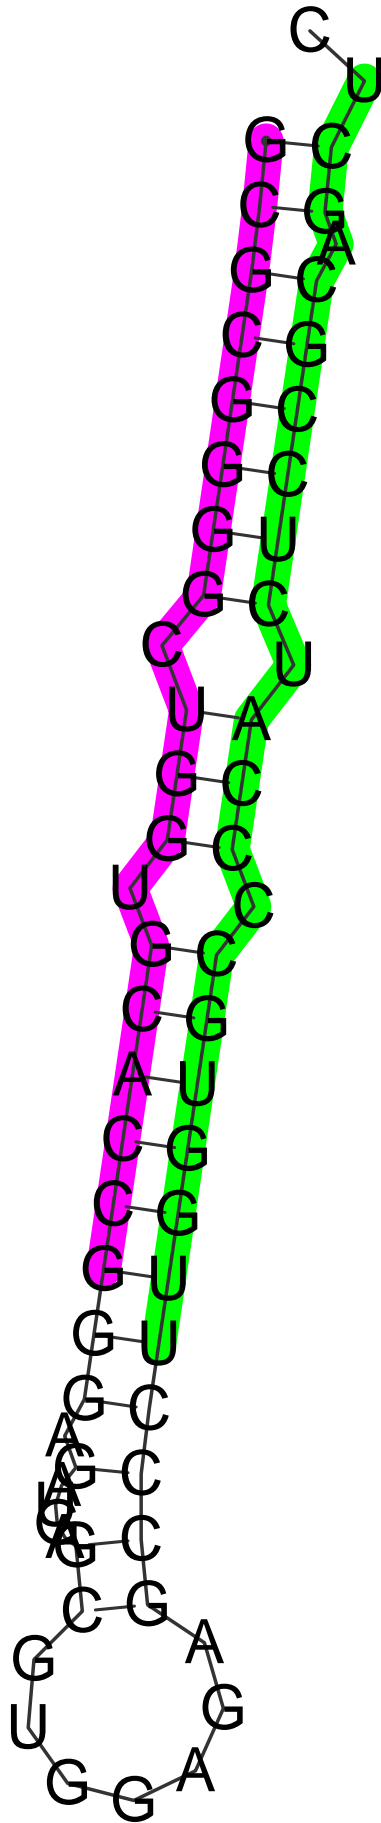

NW\_006386592.1\_43159-43221



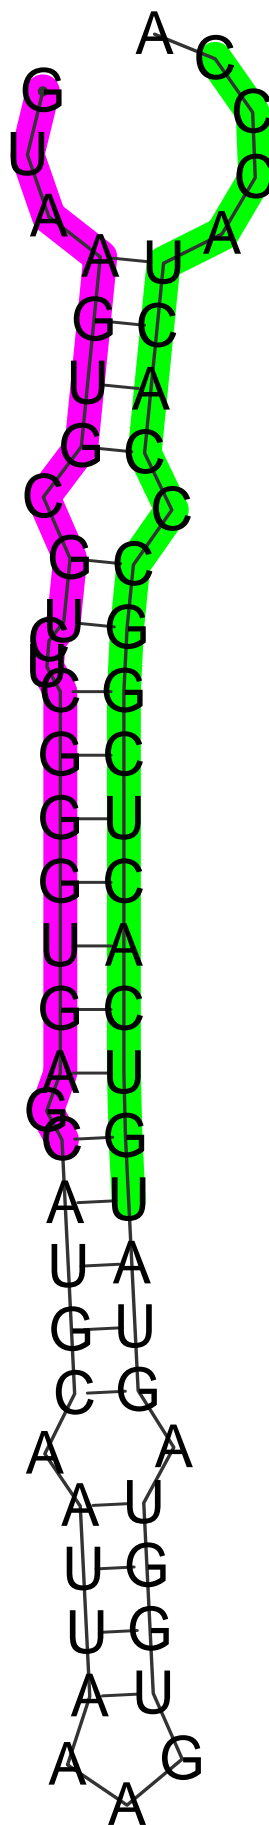

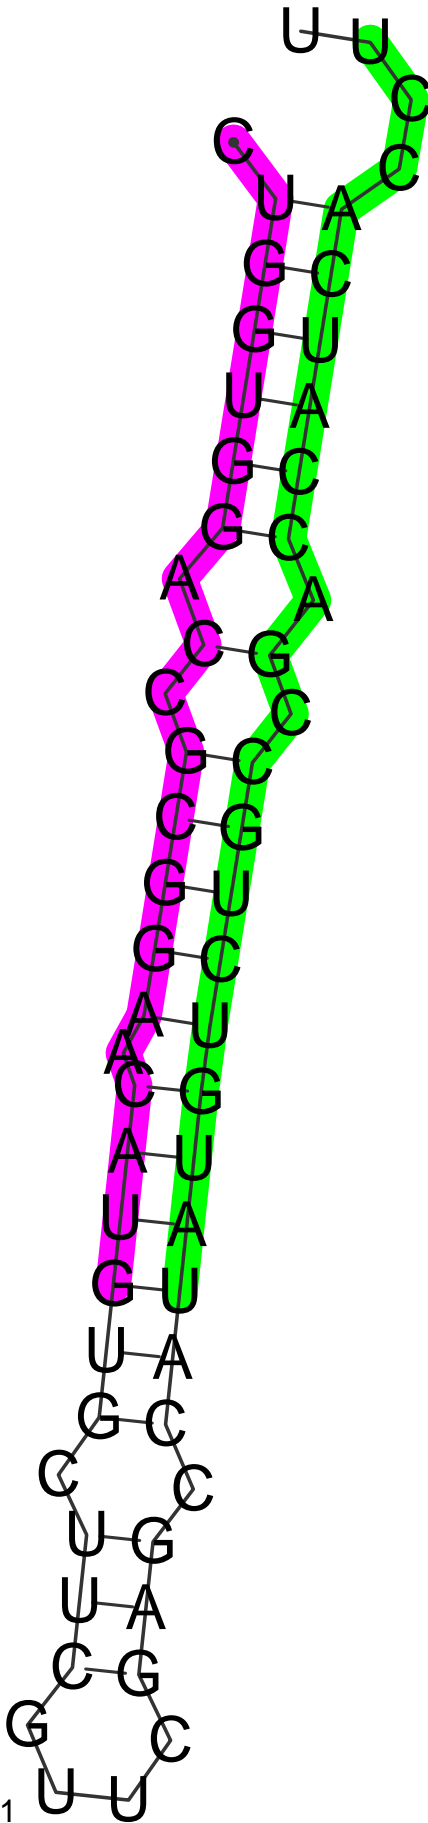



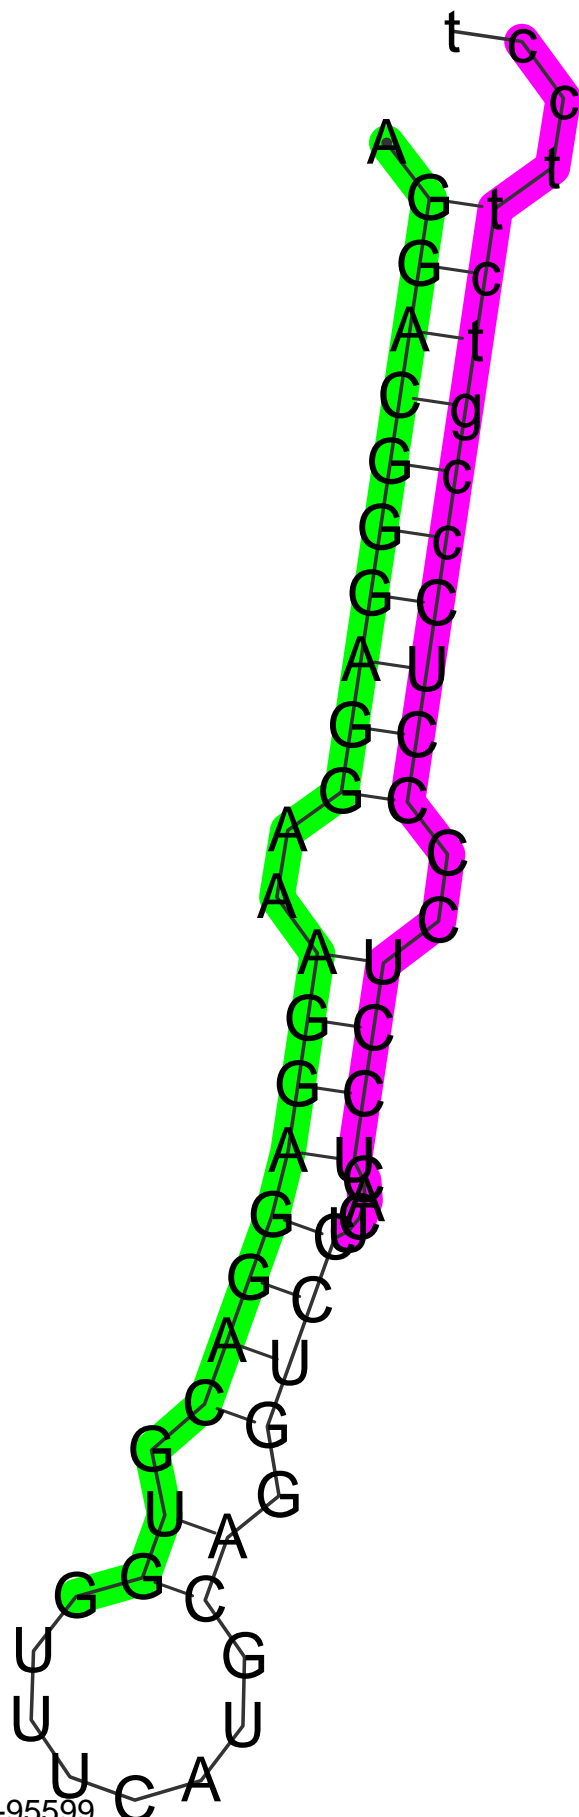

NW\_006386681.1\_95537-95599



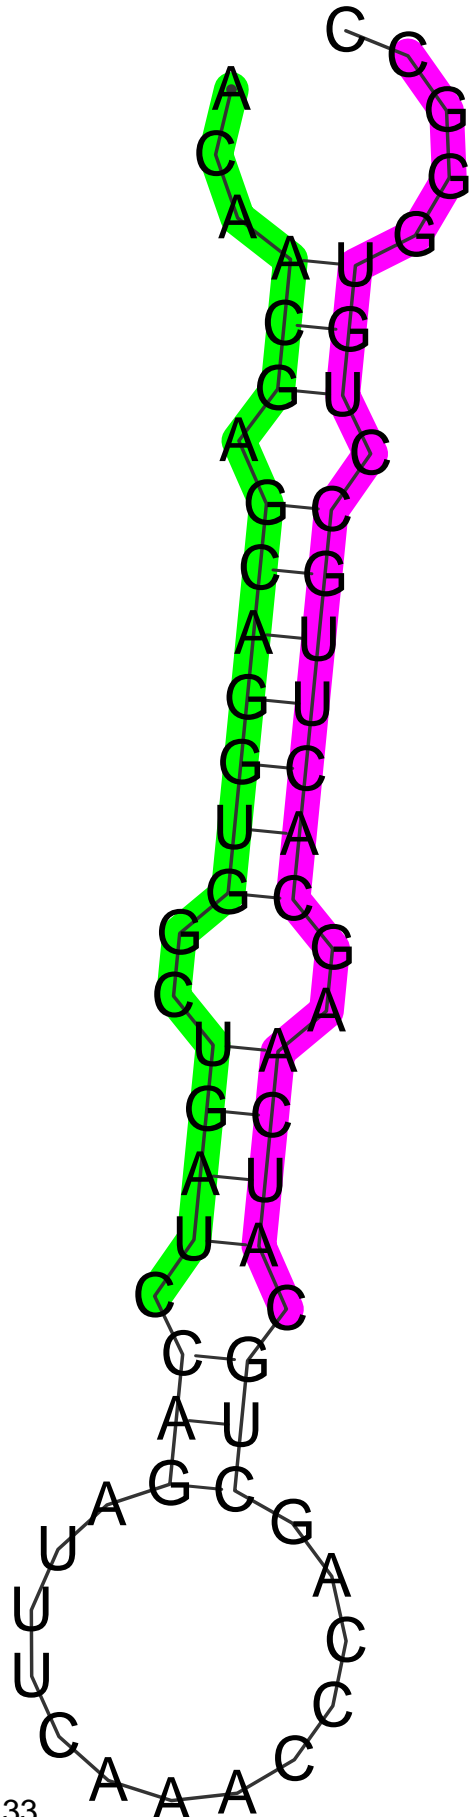



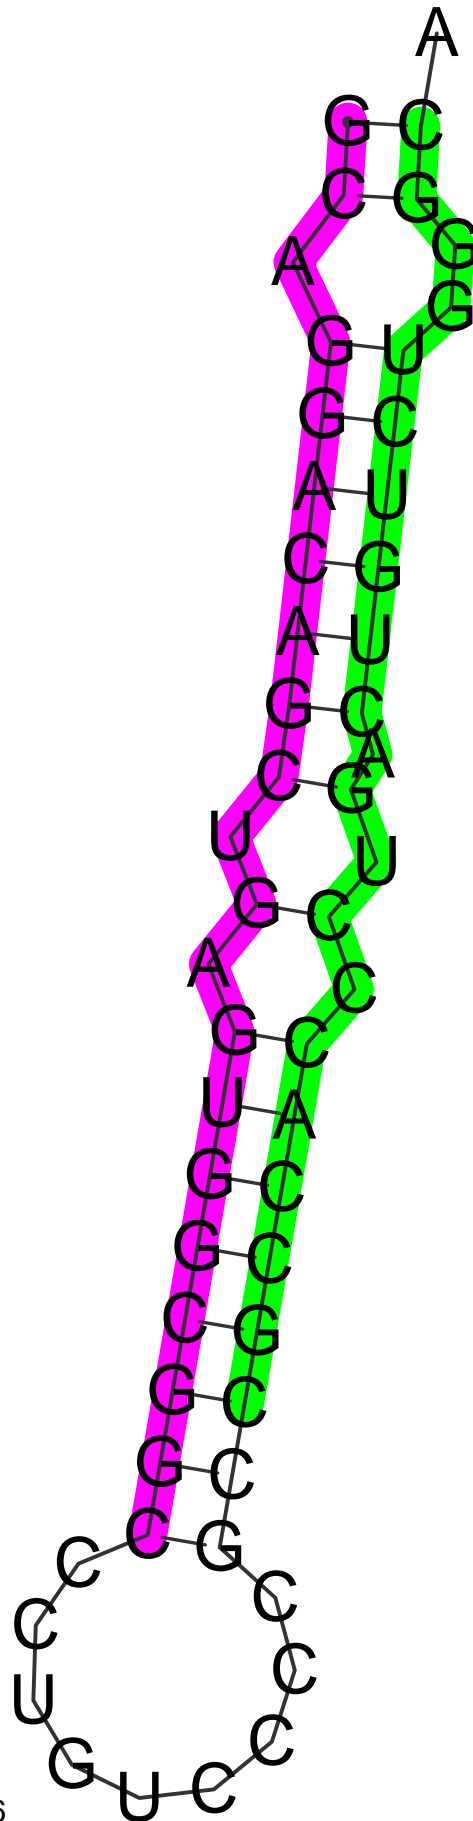



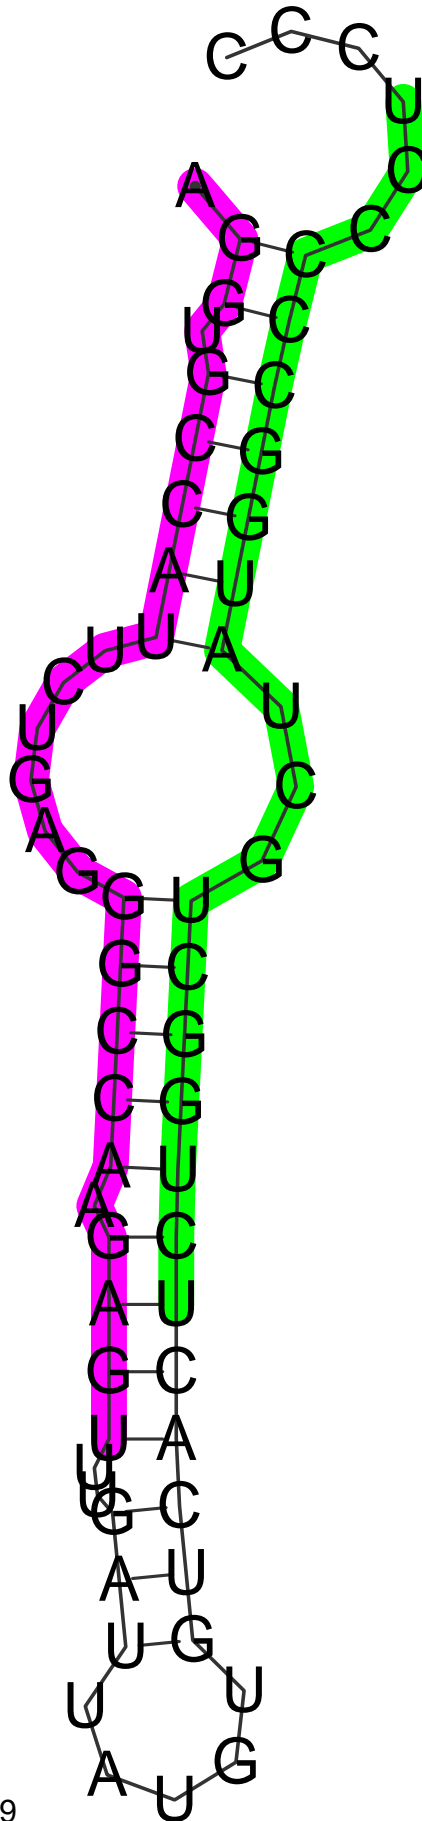

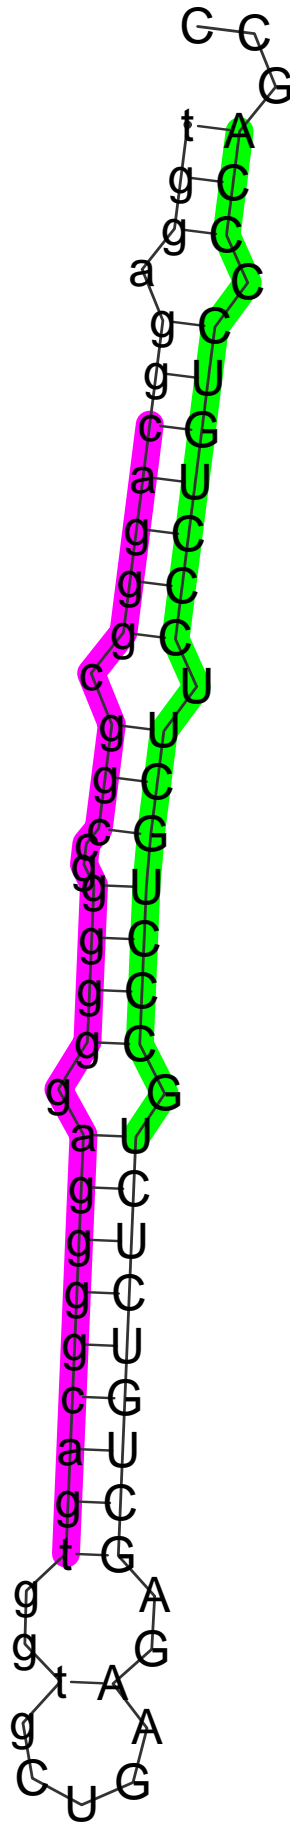









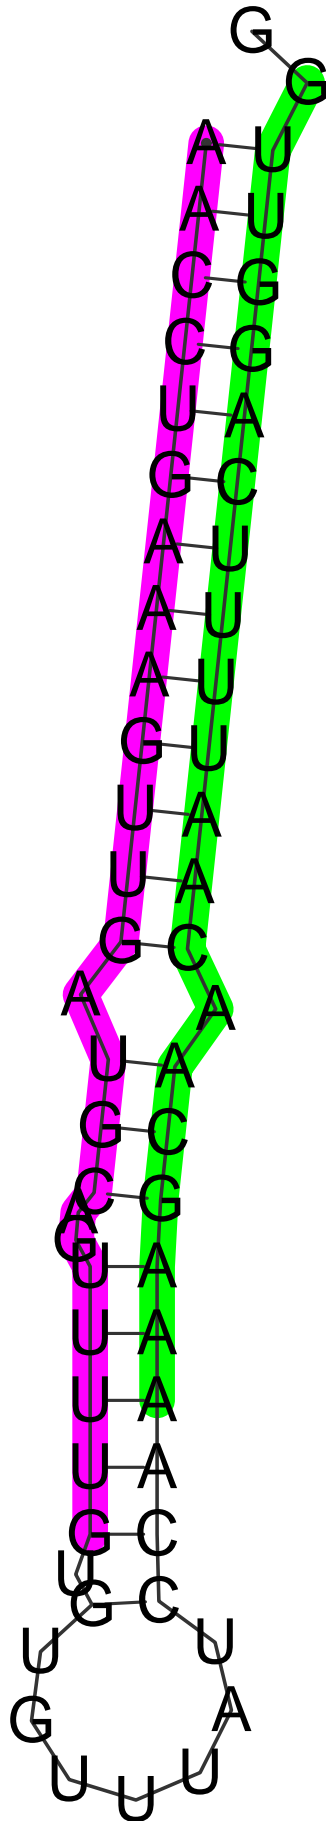

NW\_006390522.1\_8996-9053





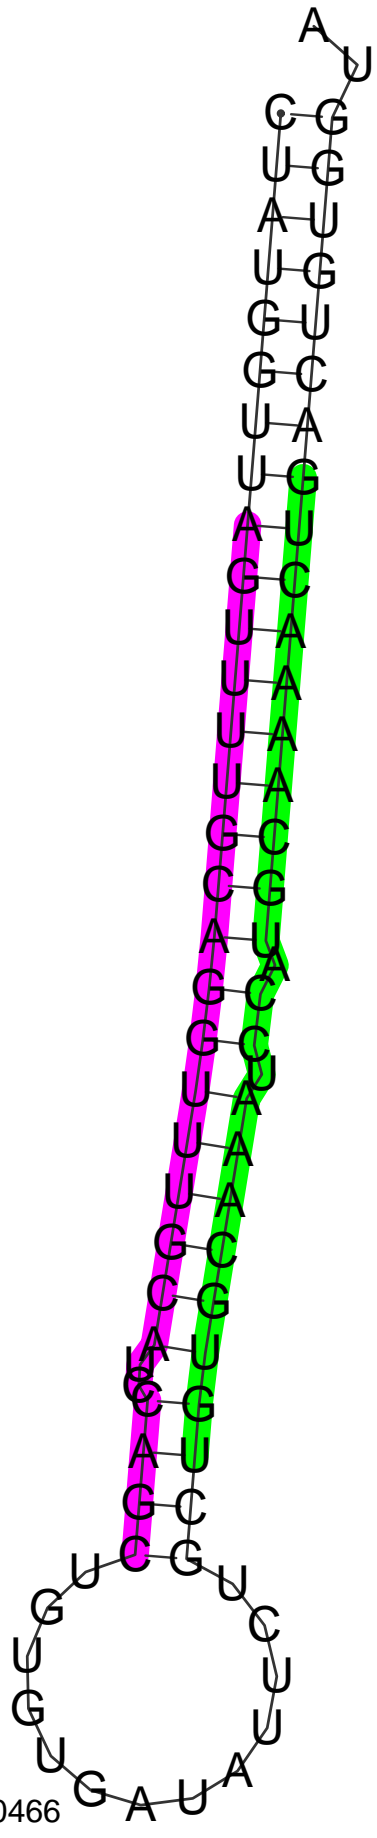

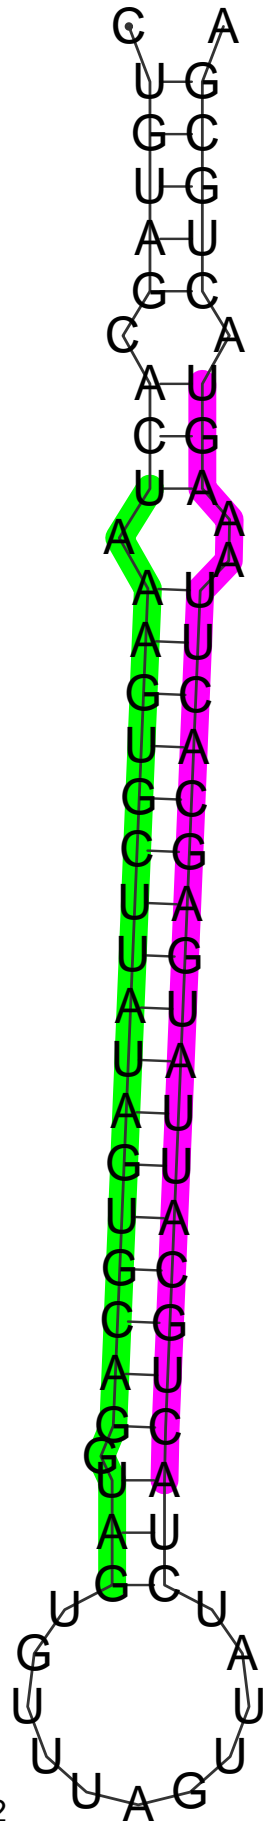



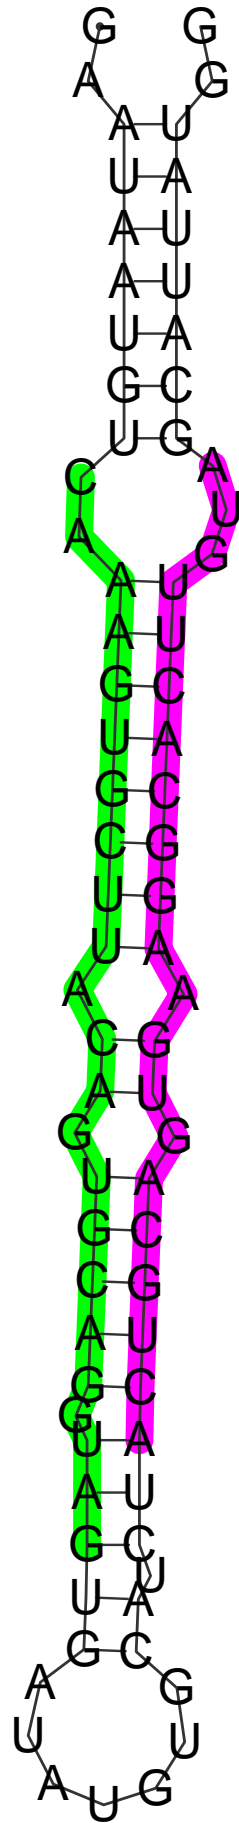

NW\_006383042.1\_1100995-1101070





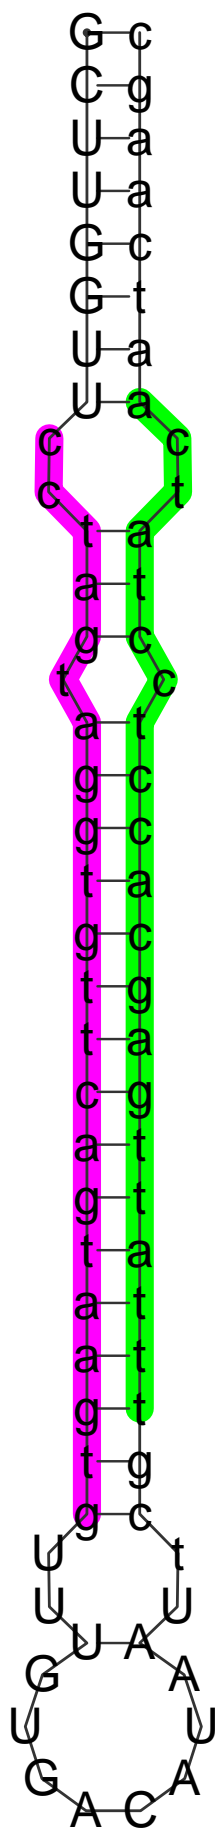

NW\_006383043.1\_1552314-1552387

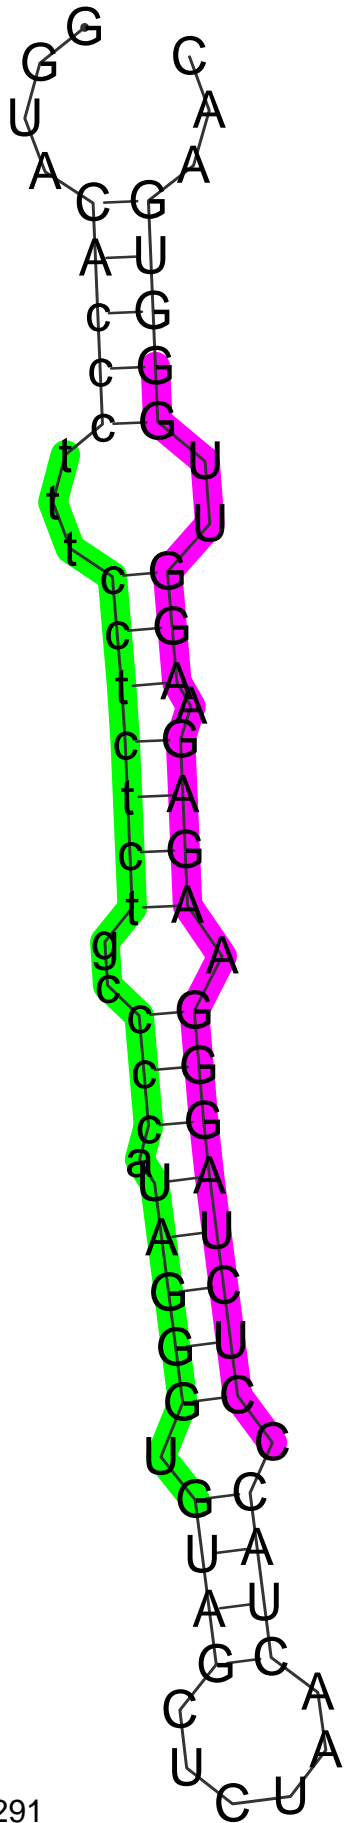

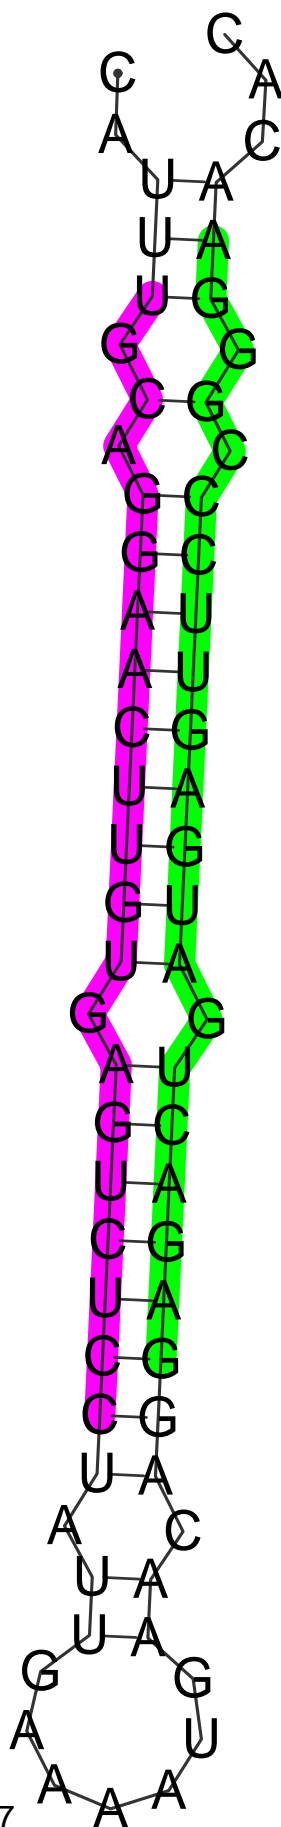

NW\_006383062.1\_3365692-3365757

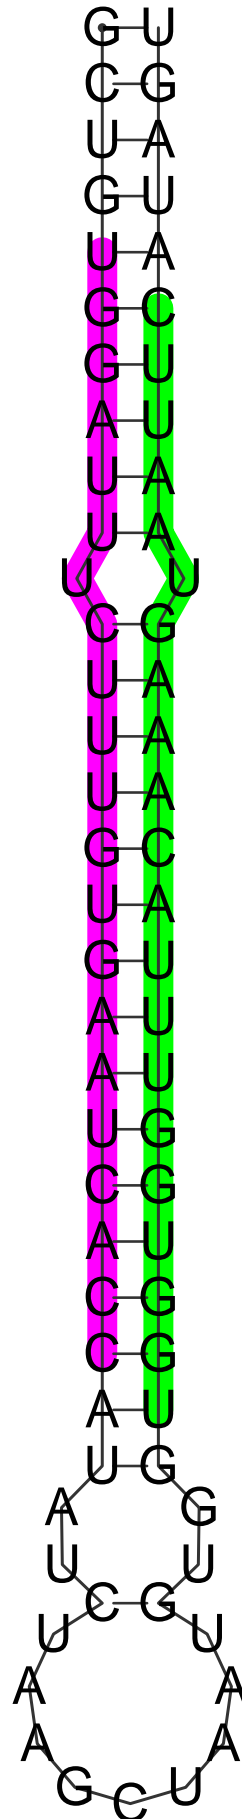

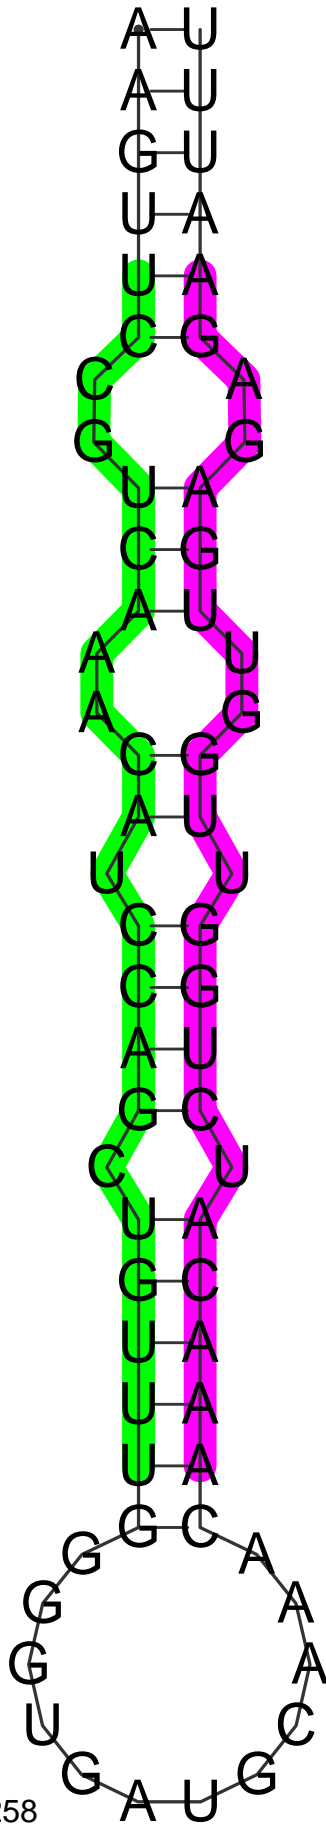









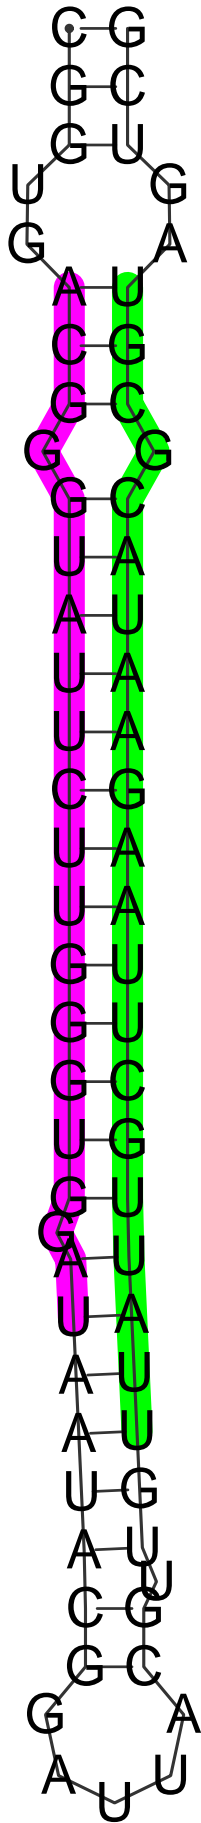

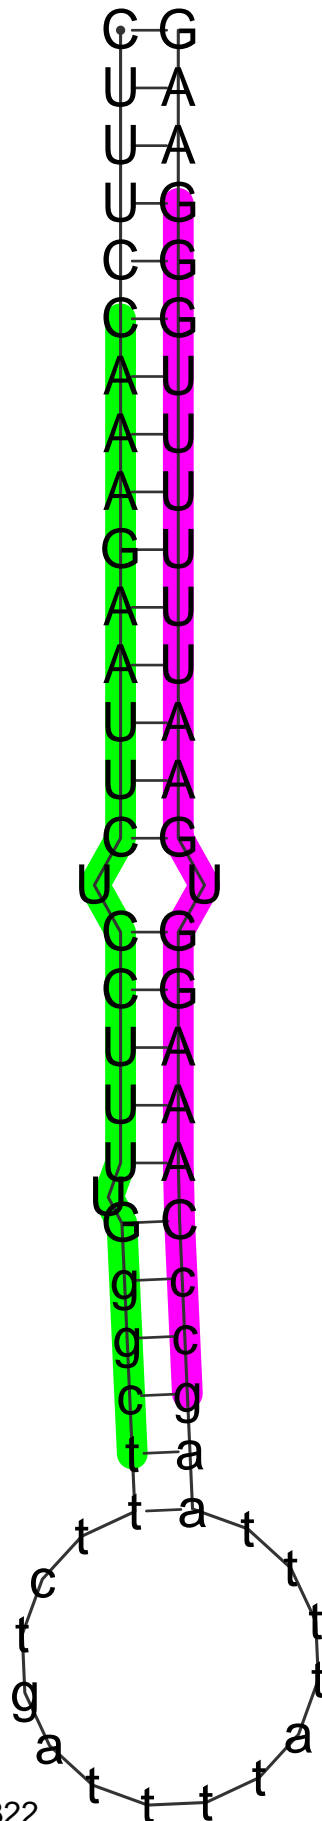



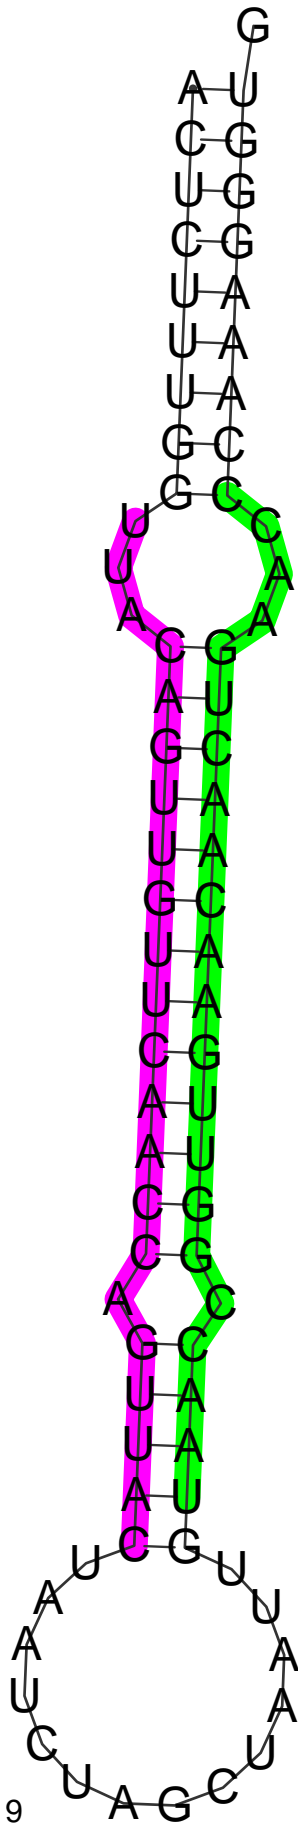





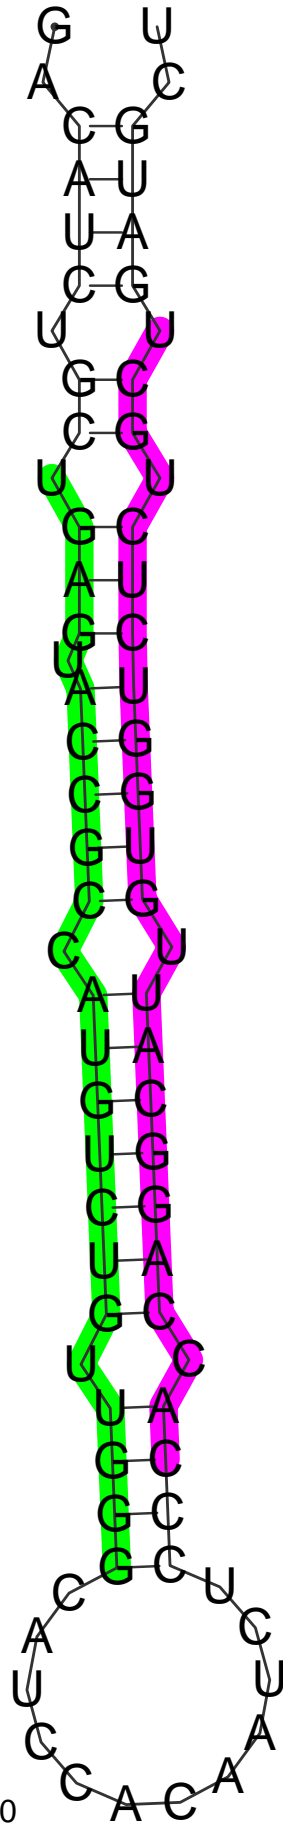

NW\_006383124.1\_2626066-2626140

















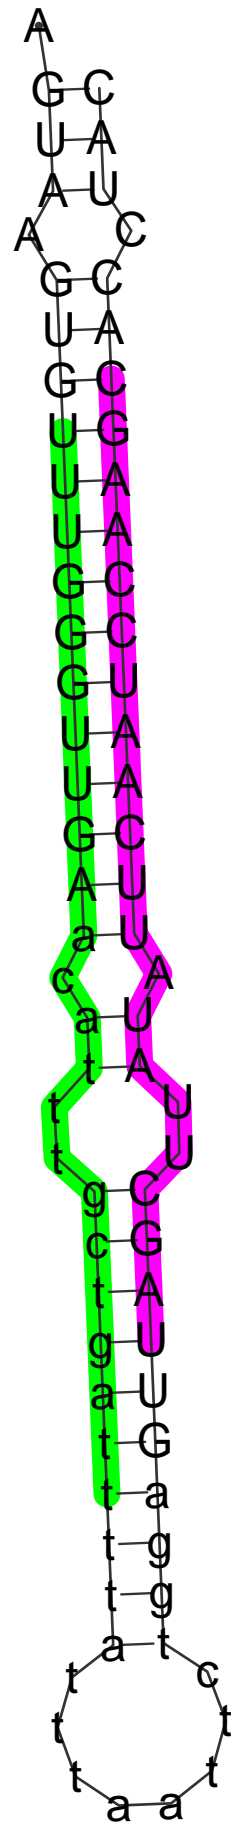



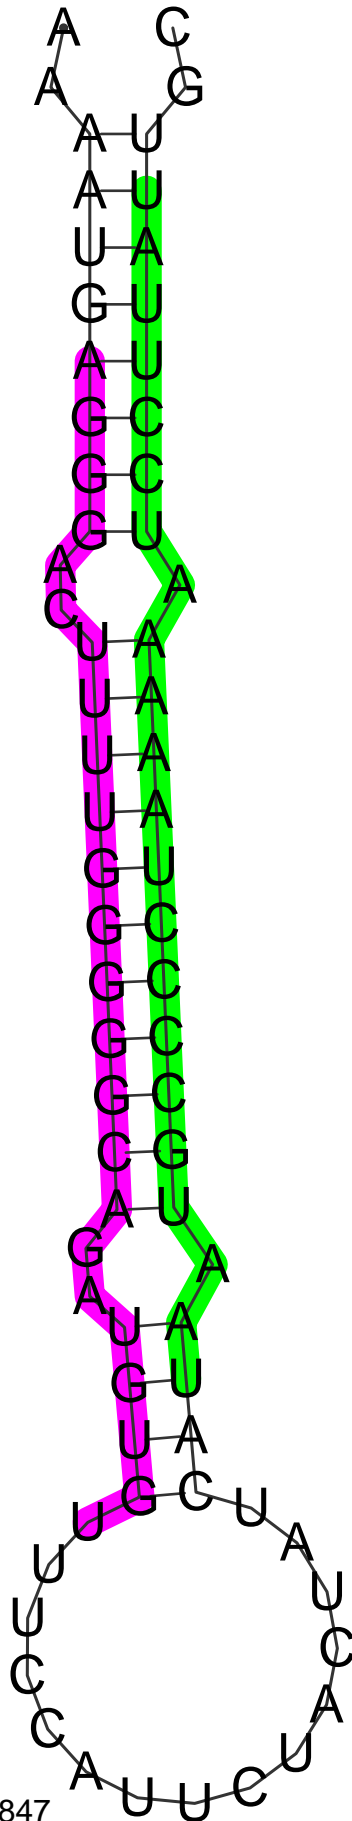

NW\_006383147.1\_1086777-1086847





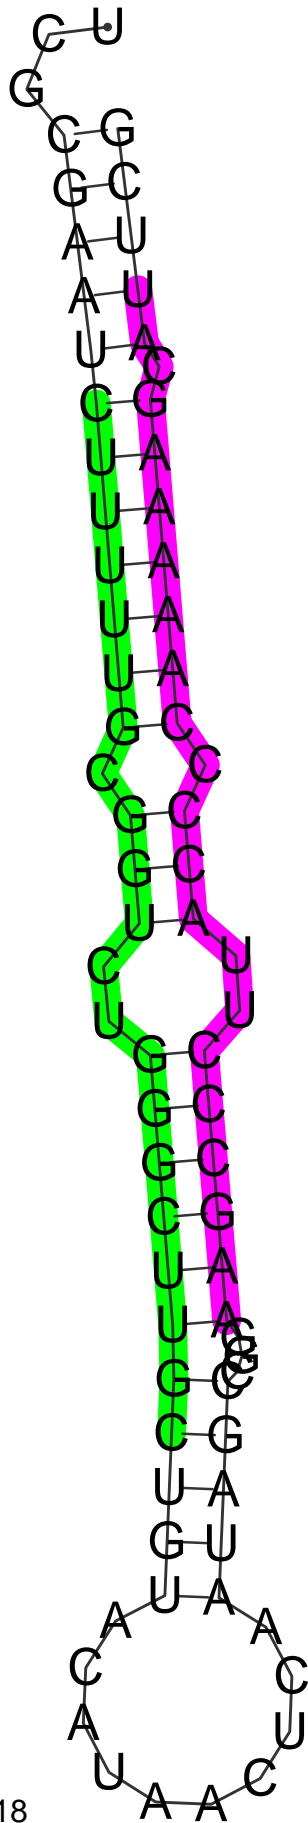

NW\_006383150.1\_2058944-2059018

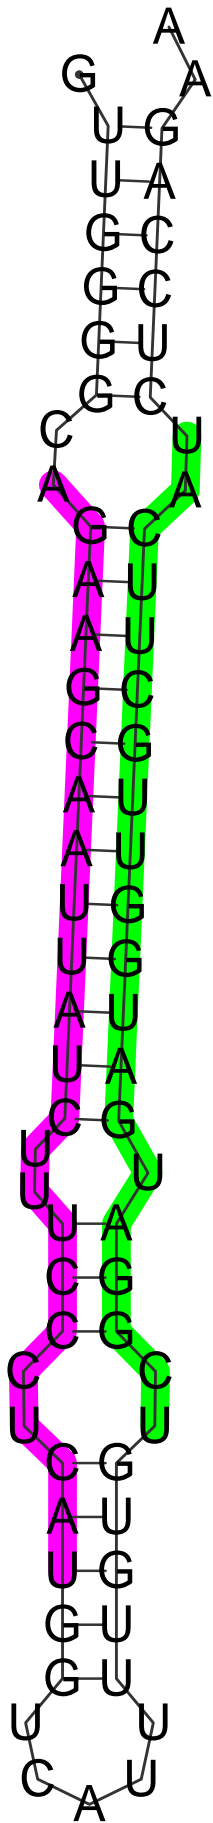

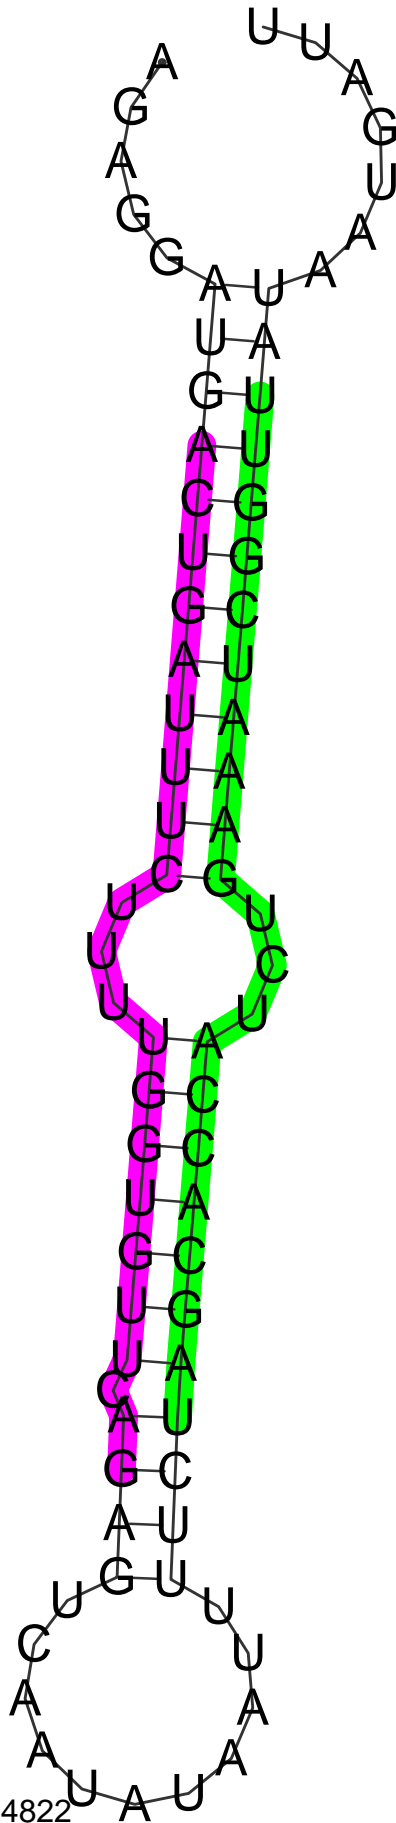

NW\_006383179.1\_1564747-1564822



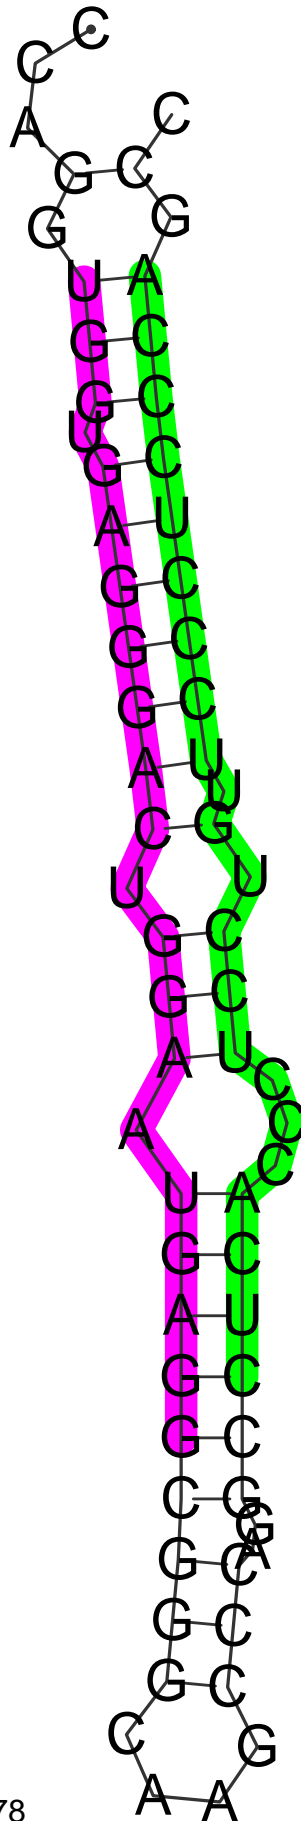



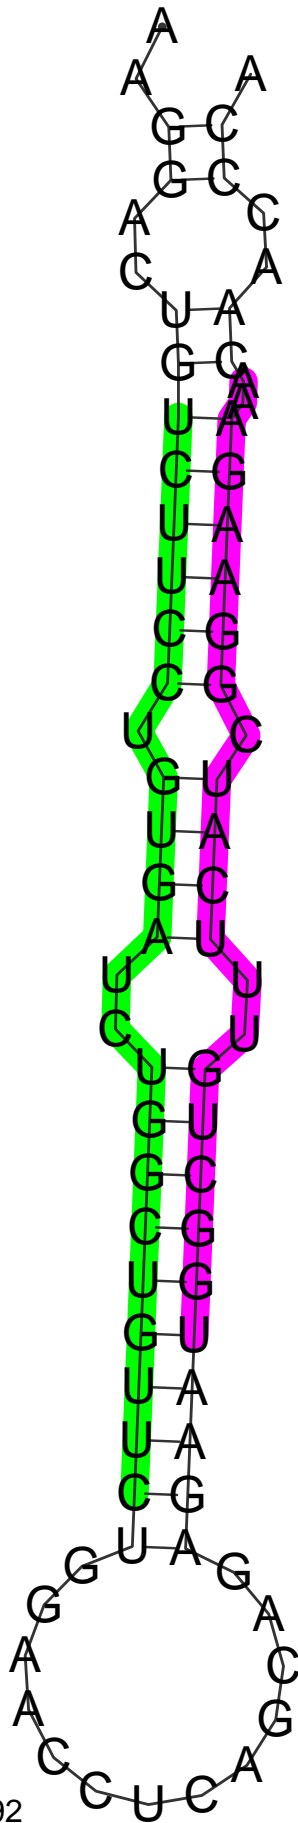

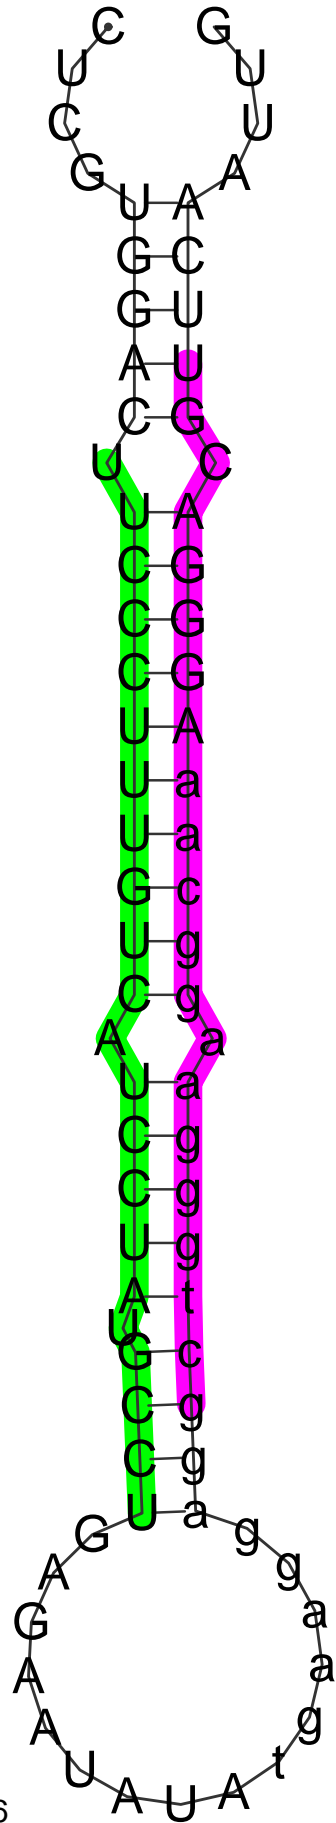

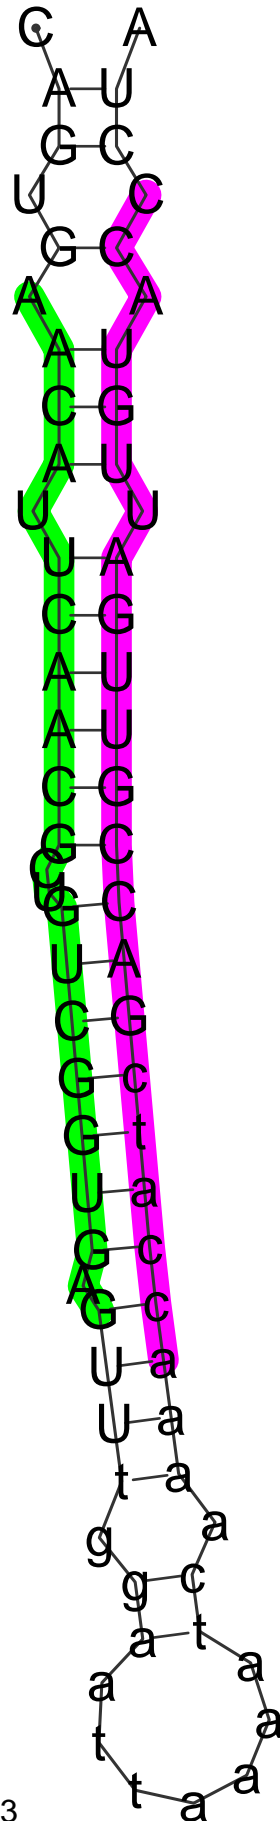

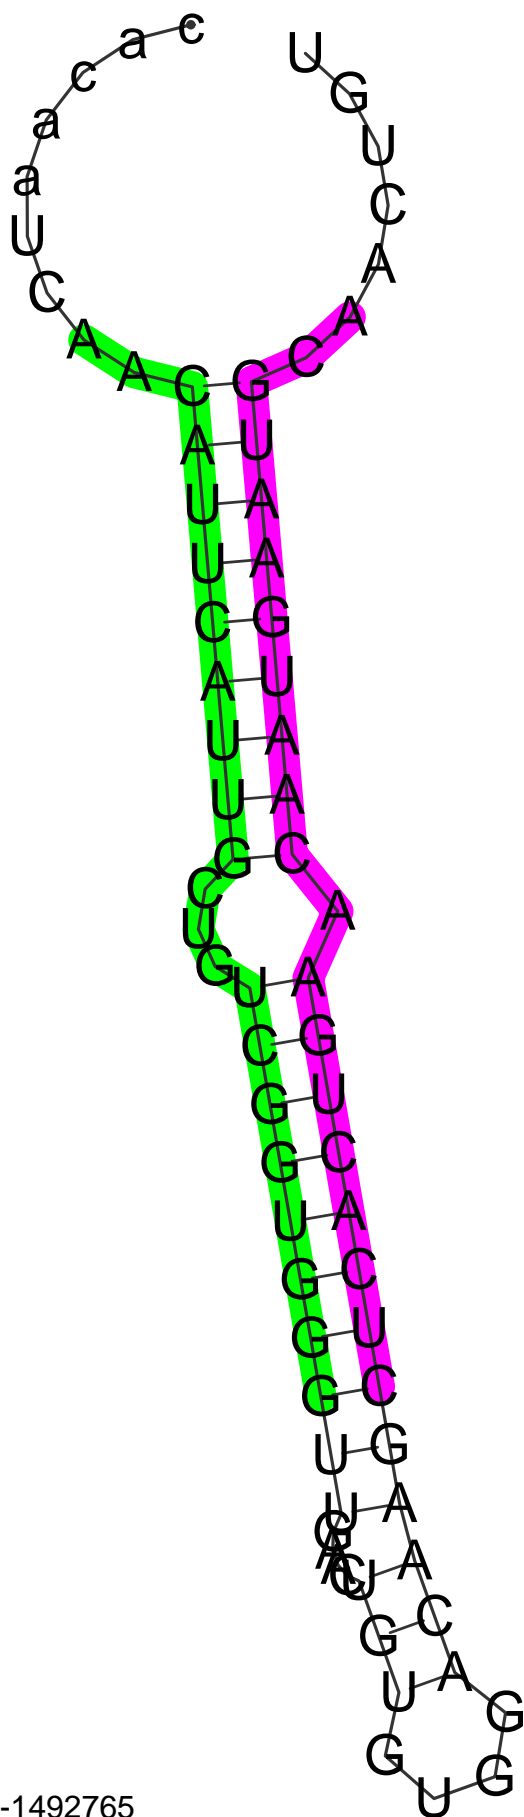

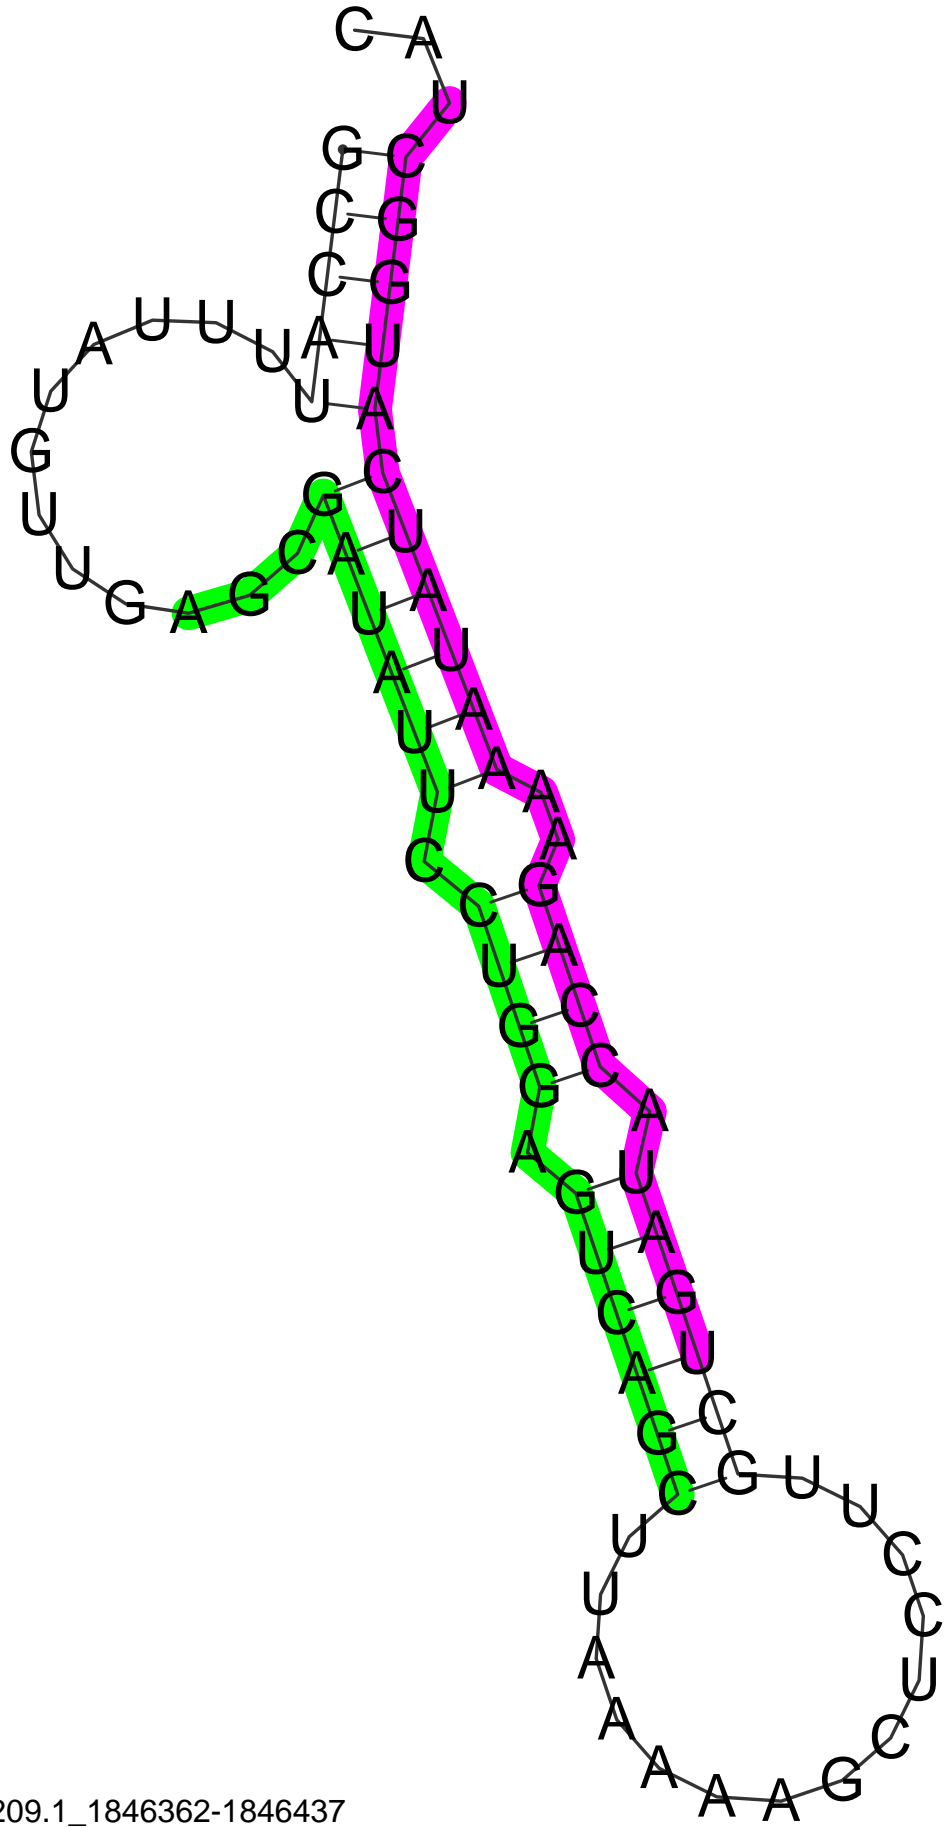

NW\_006383209.1\_1846362-1846437

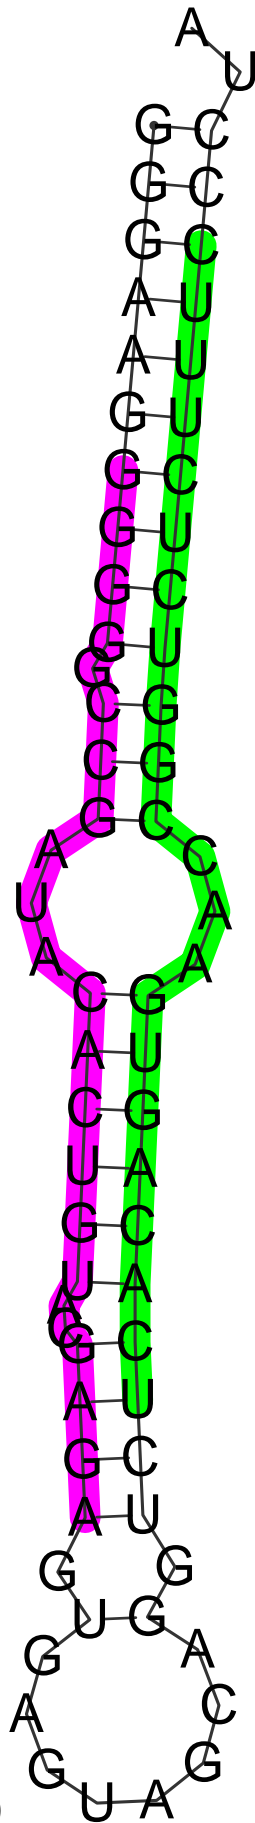

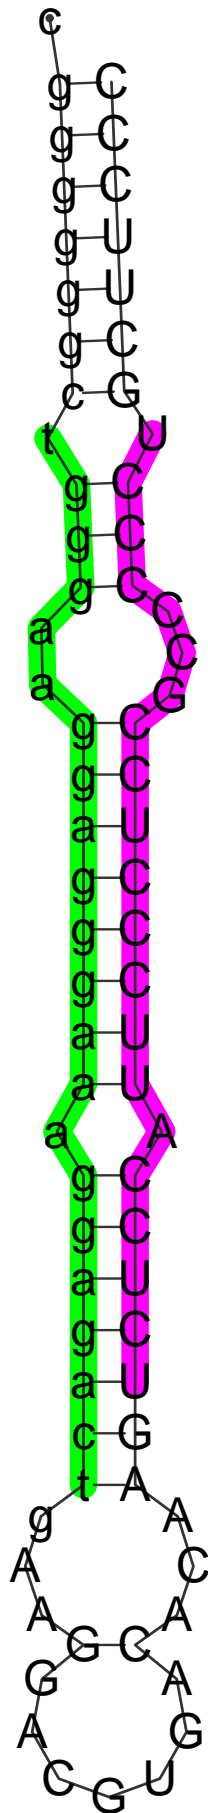

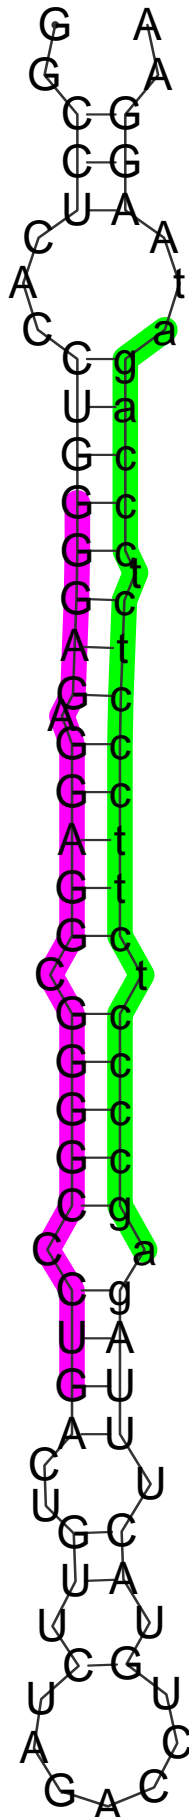



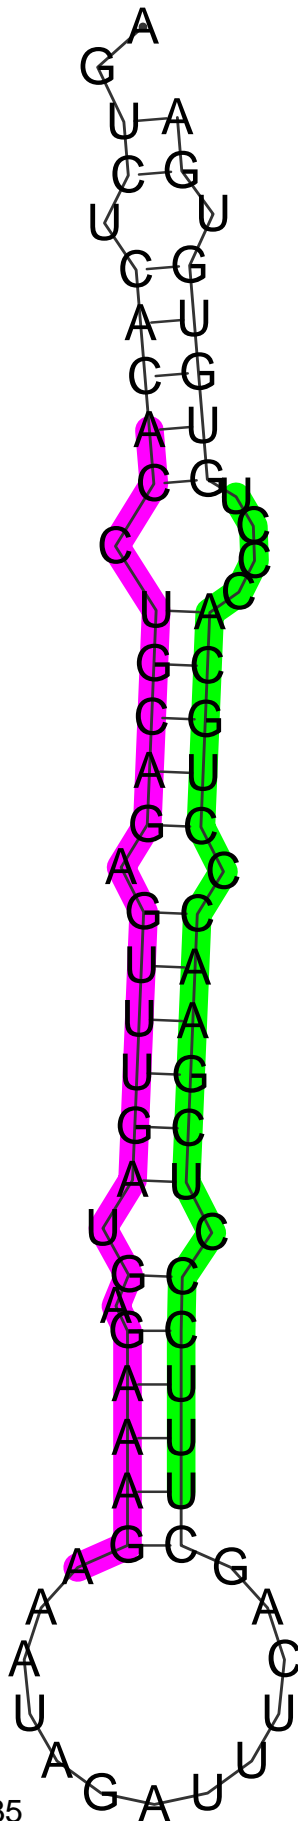

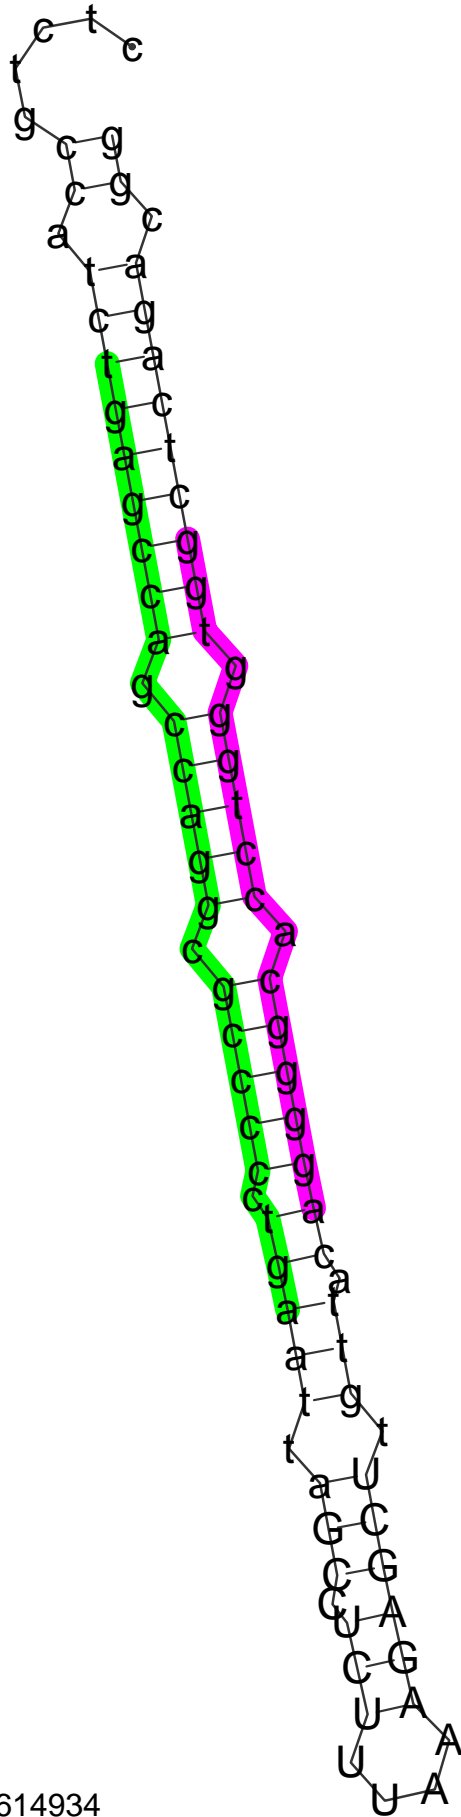

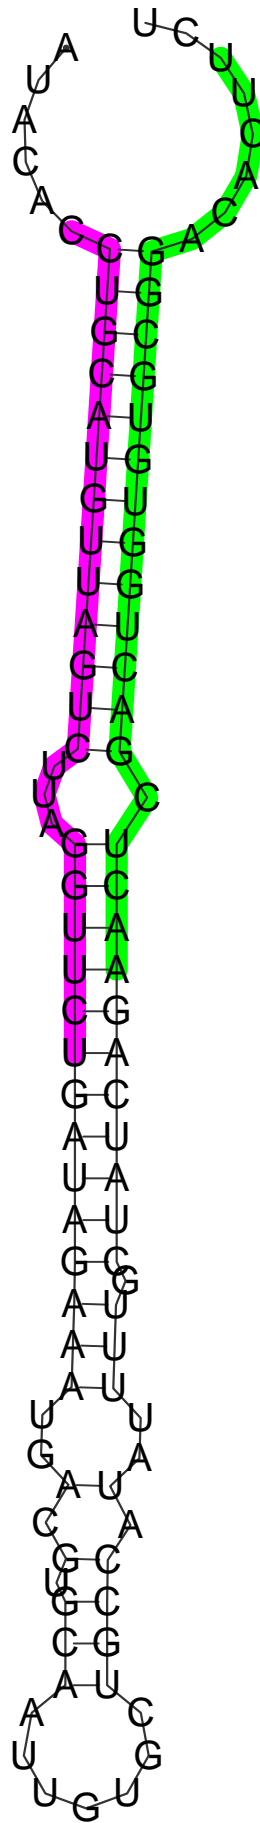

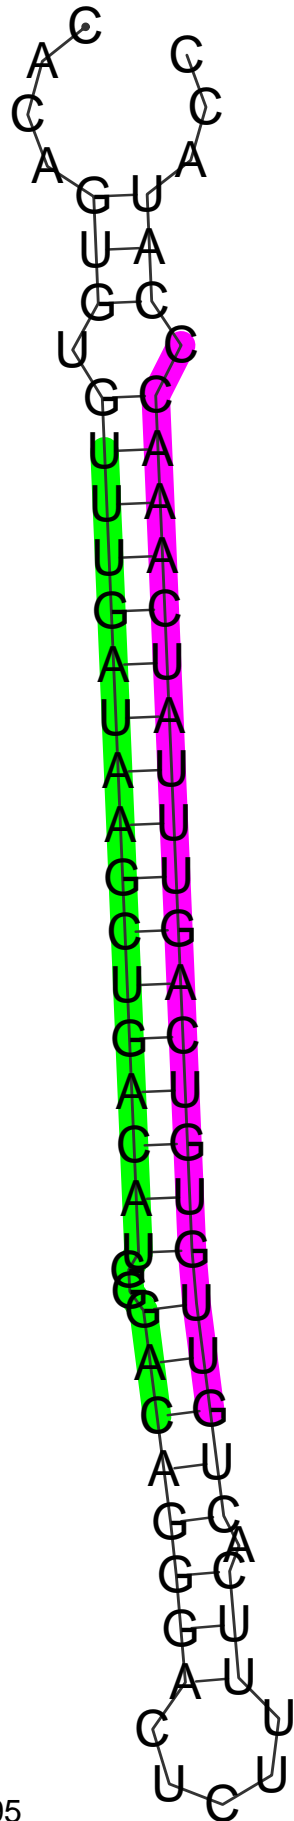

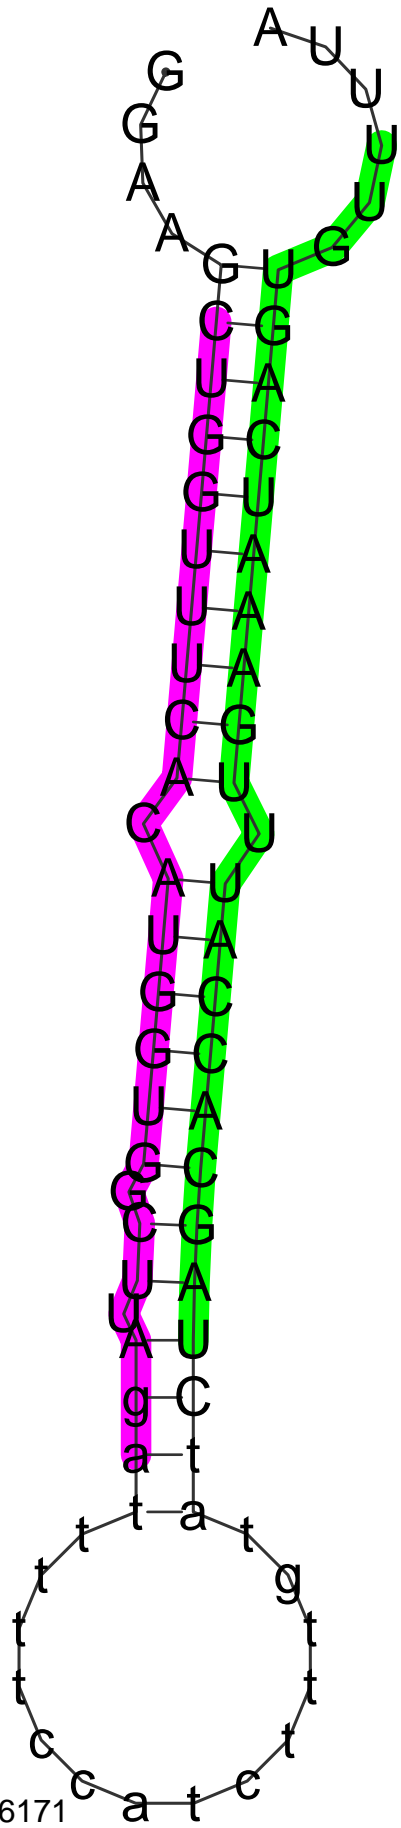

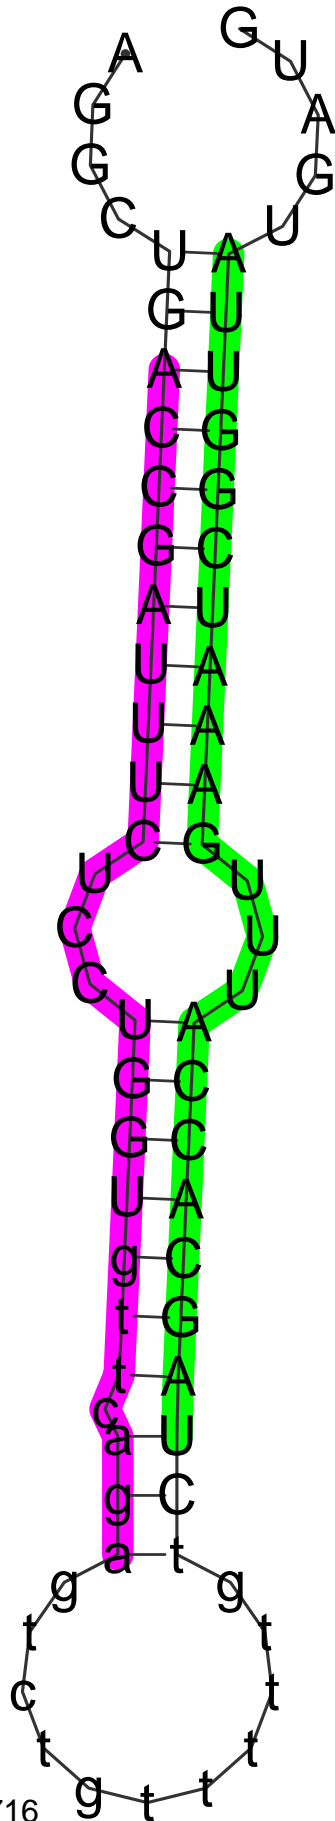

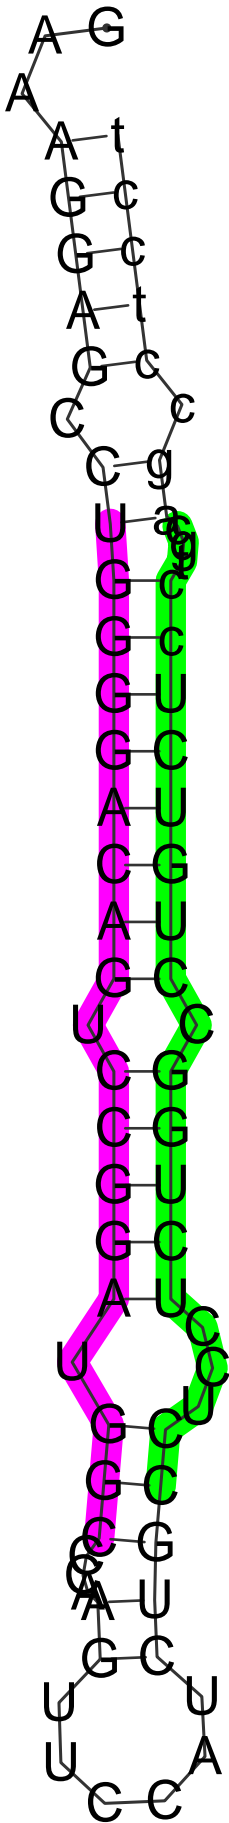

















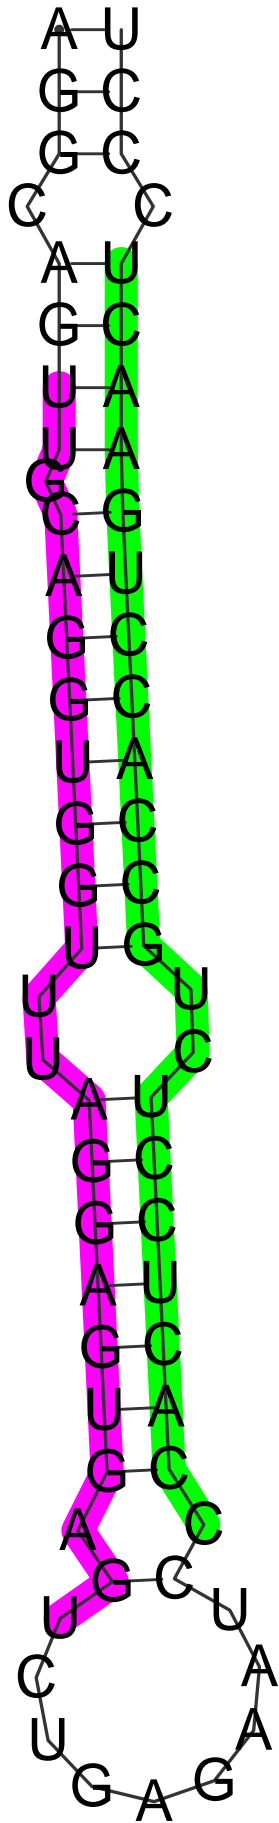





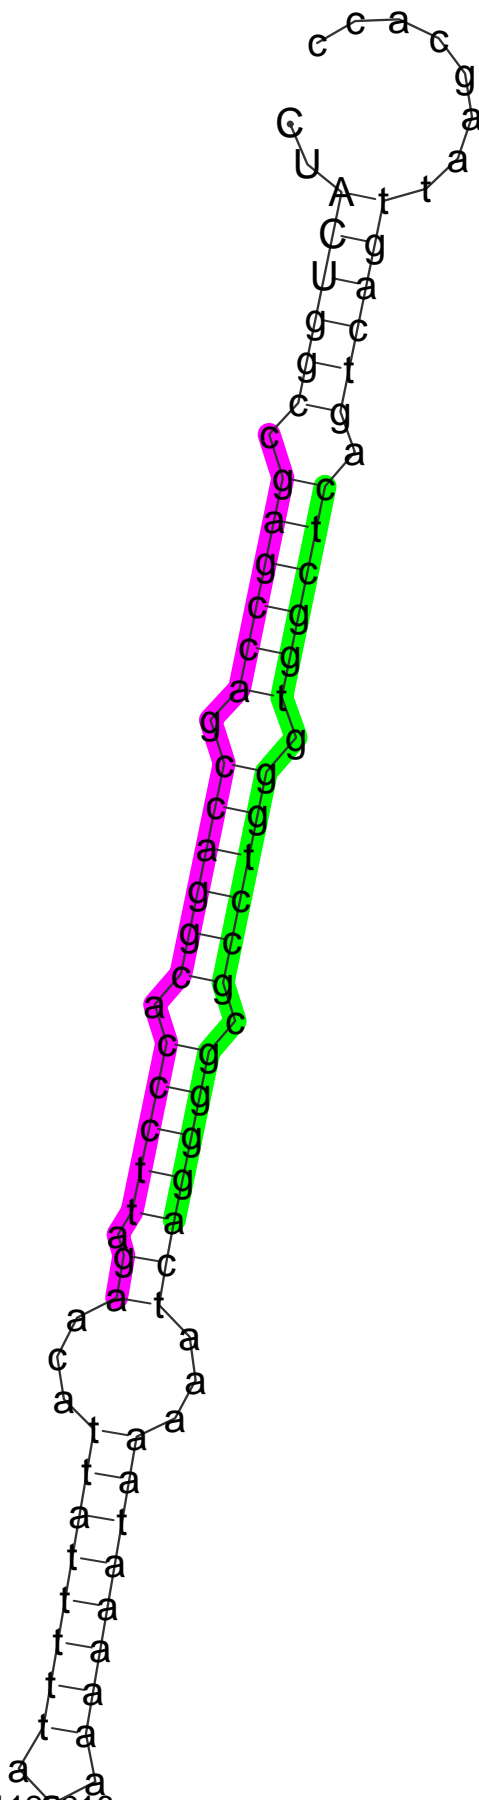

NW\_006383309.1\_1125125-1128216

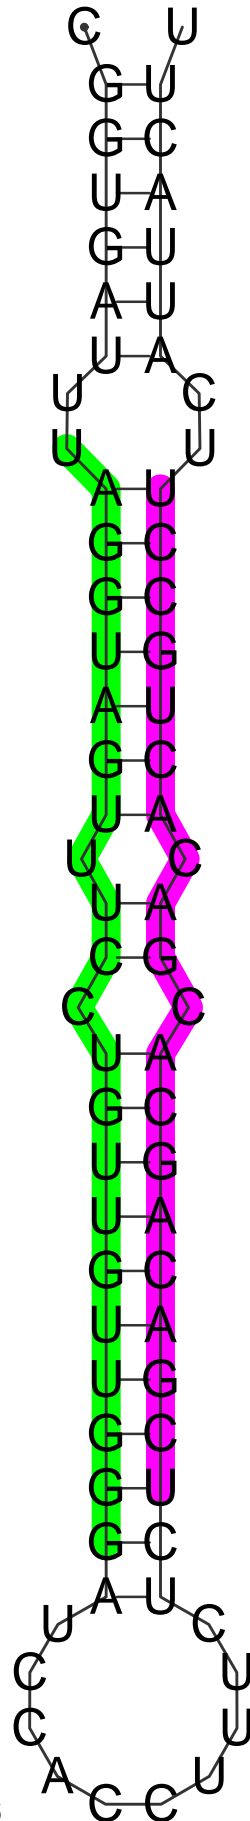

NW\_006383334.1\_1485765-1485836

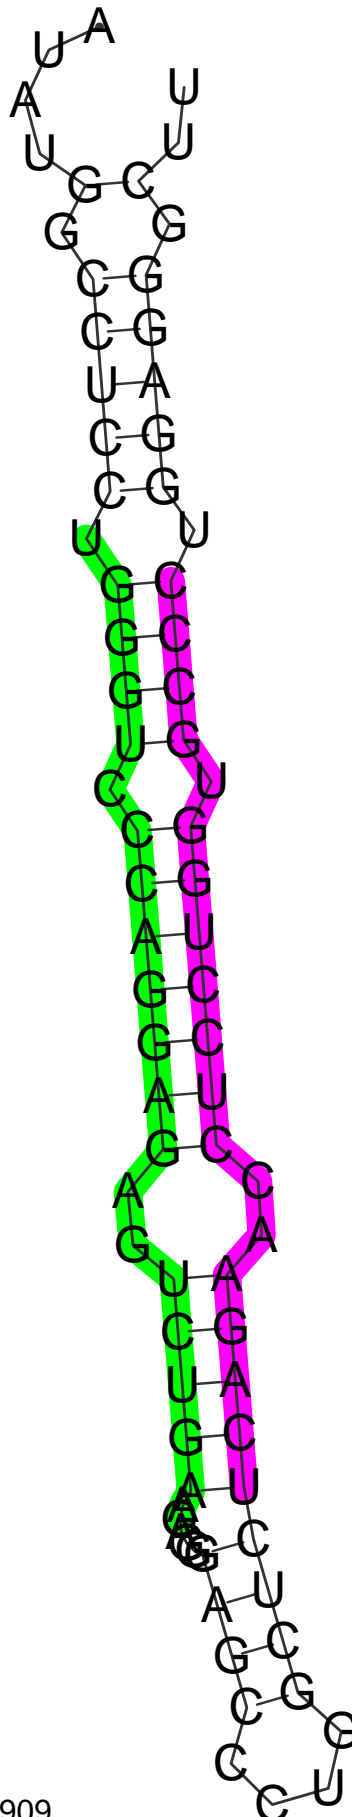



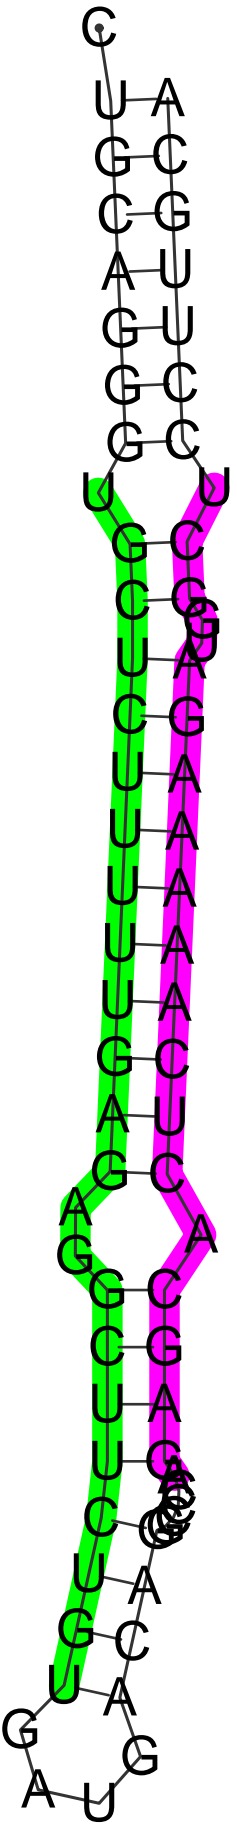

NW\_006383353.1\_1241921-1241991

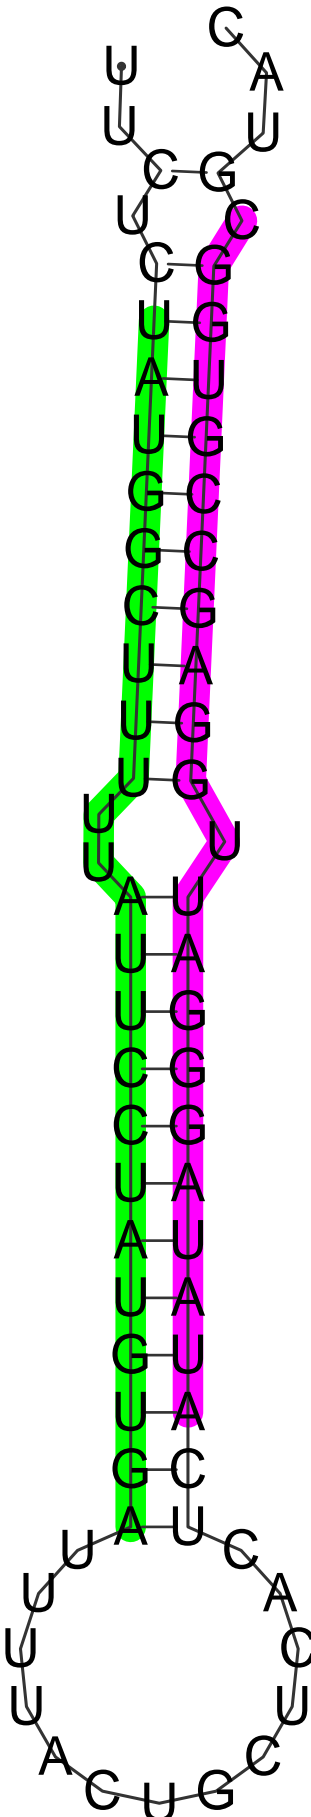

NW\_006383353.1\_193550-193618







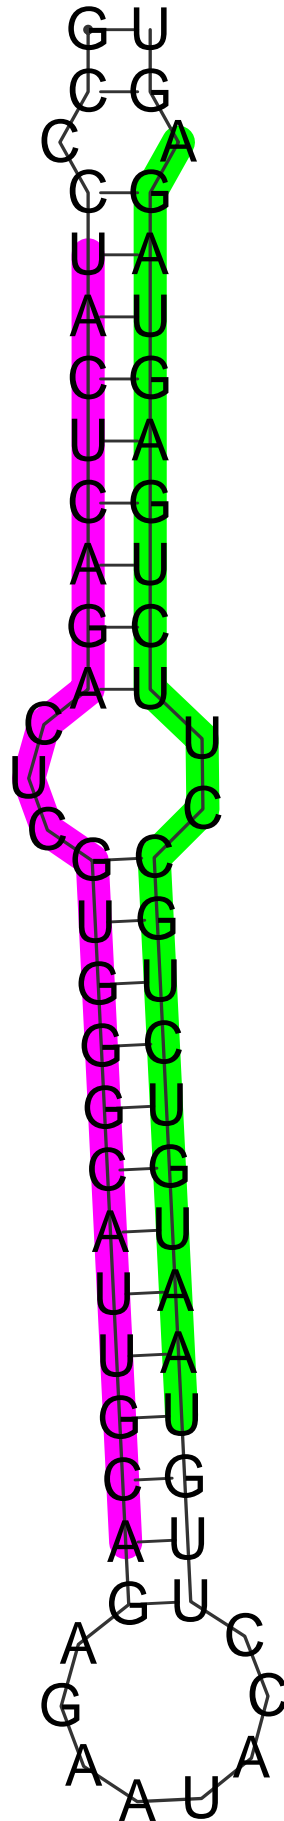



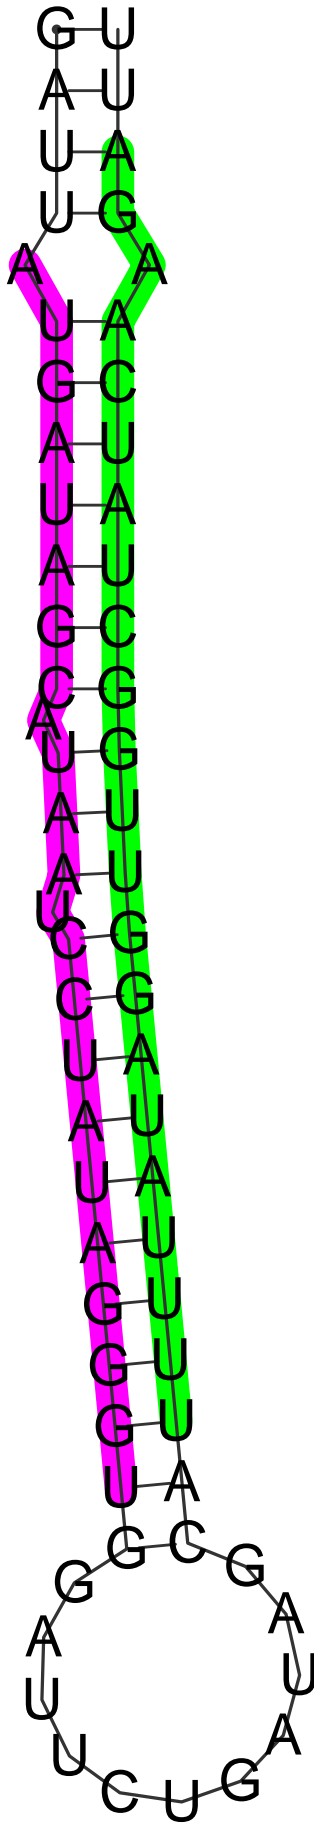

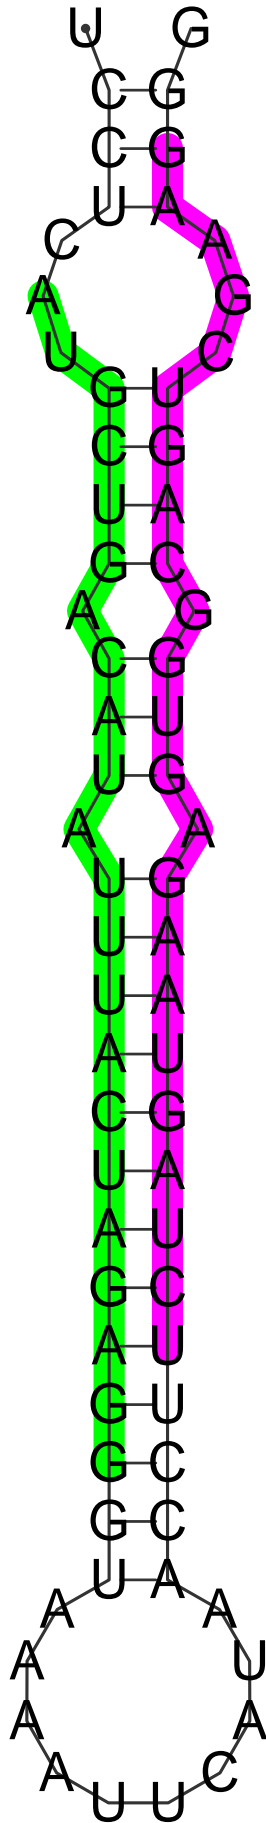

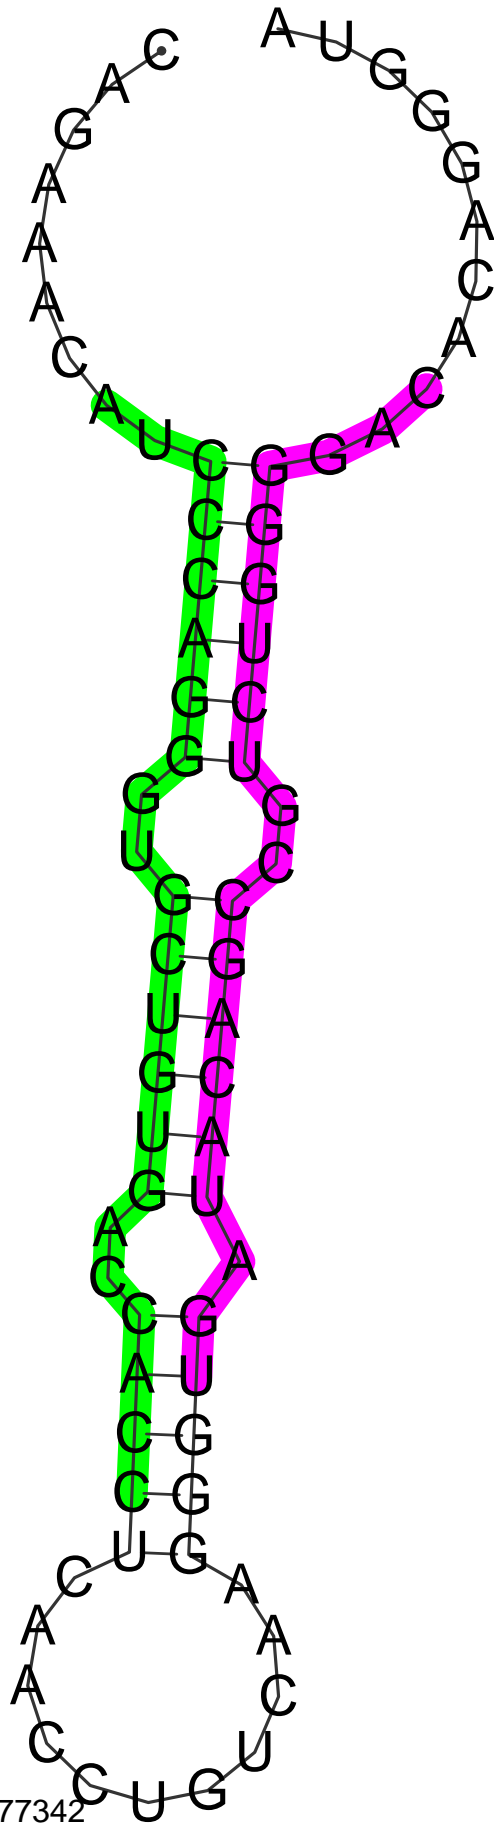

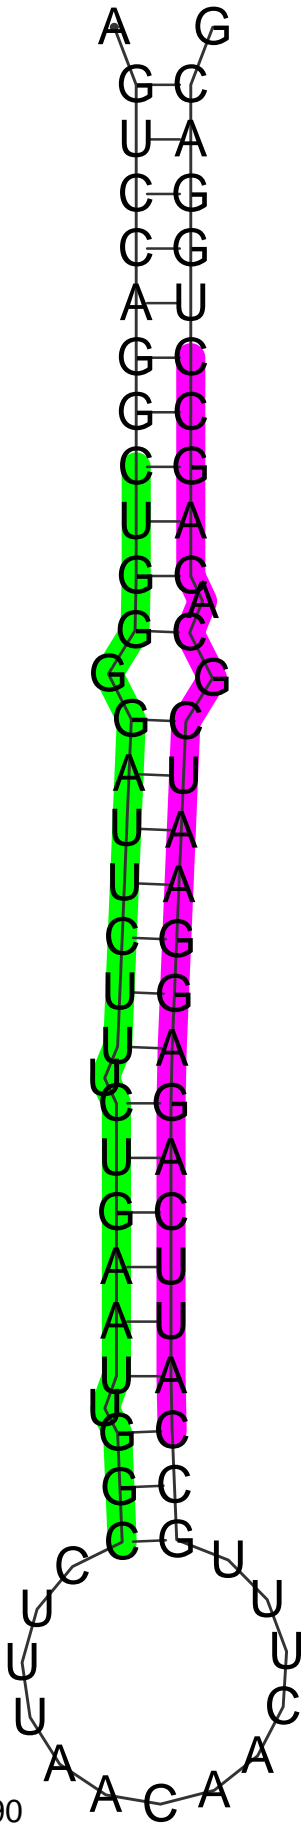









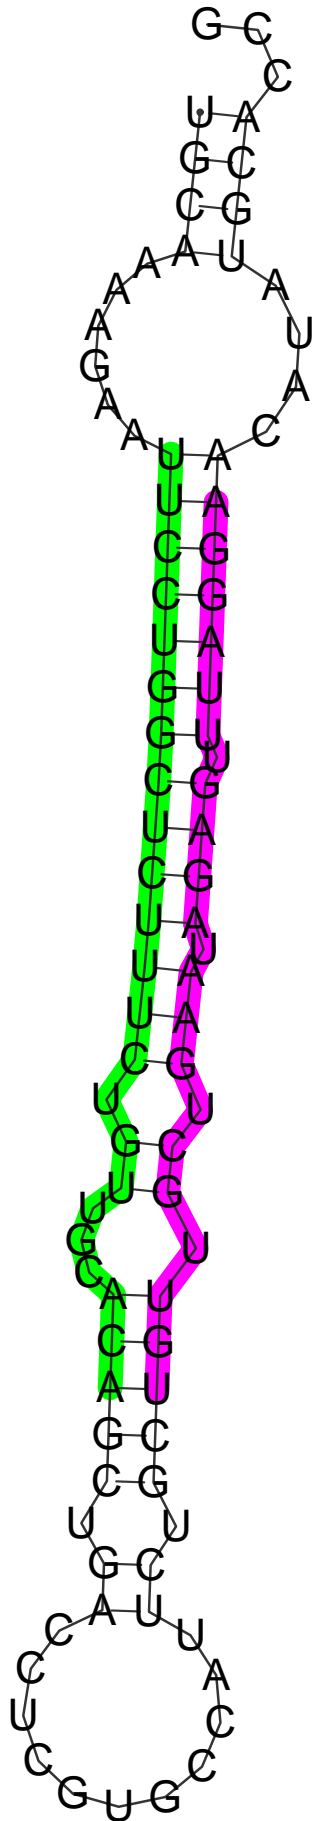

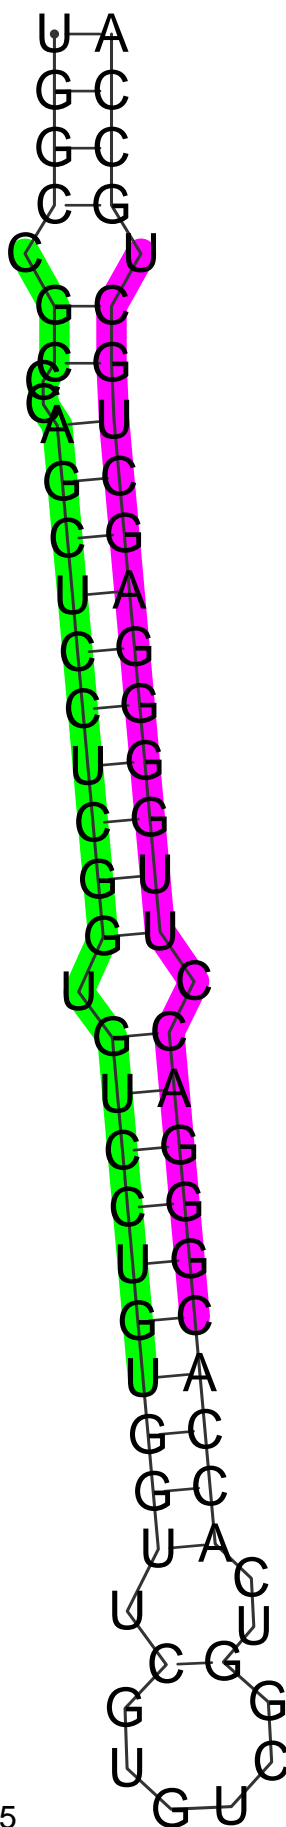

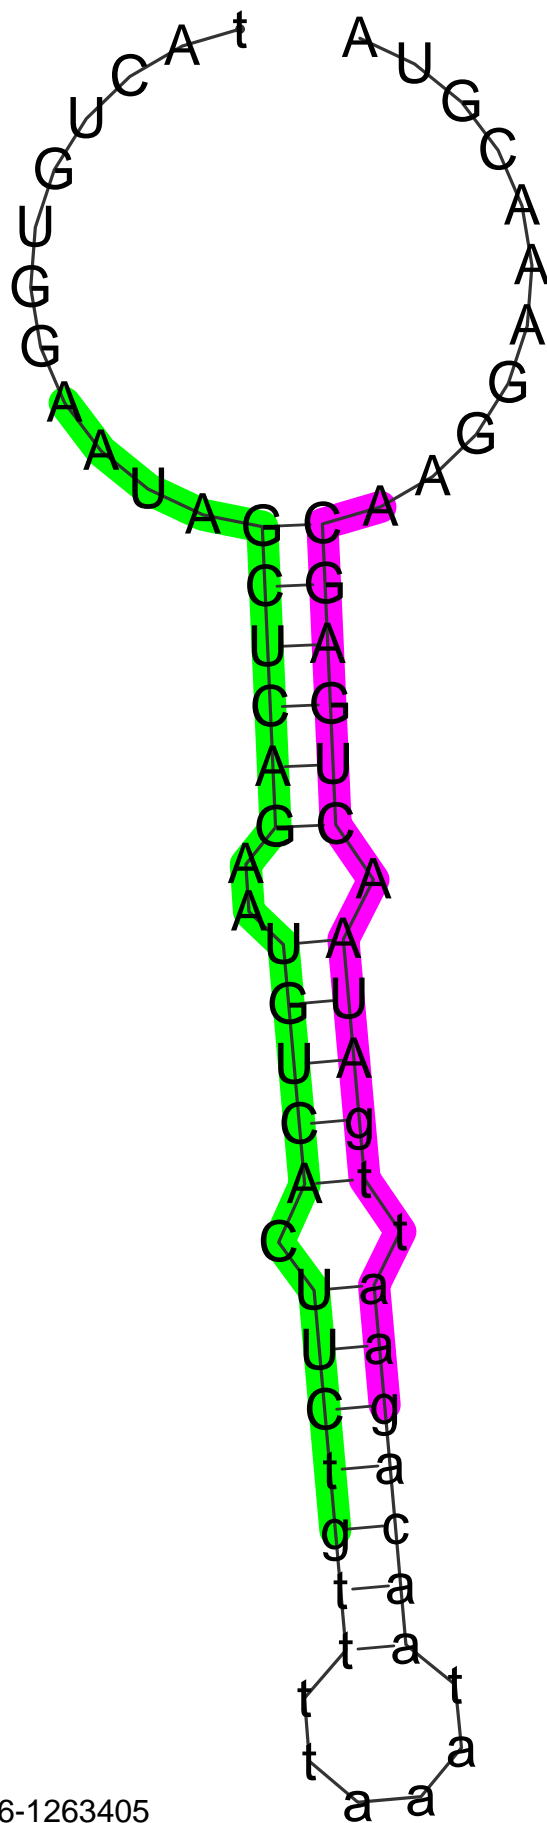







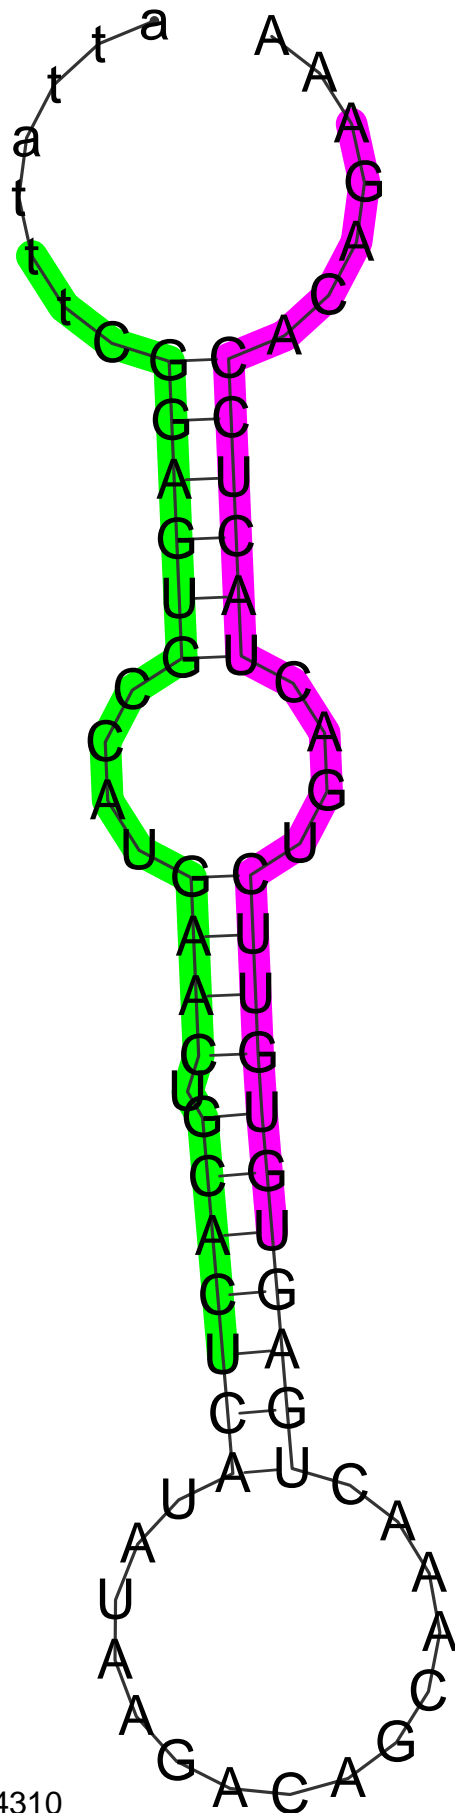



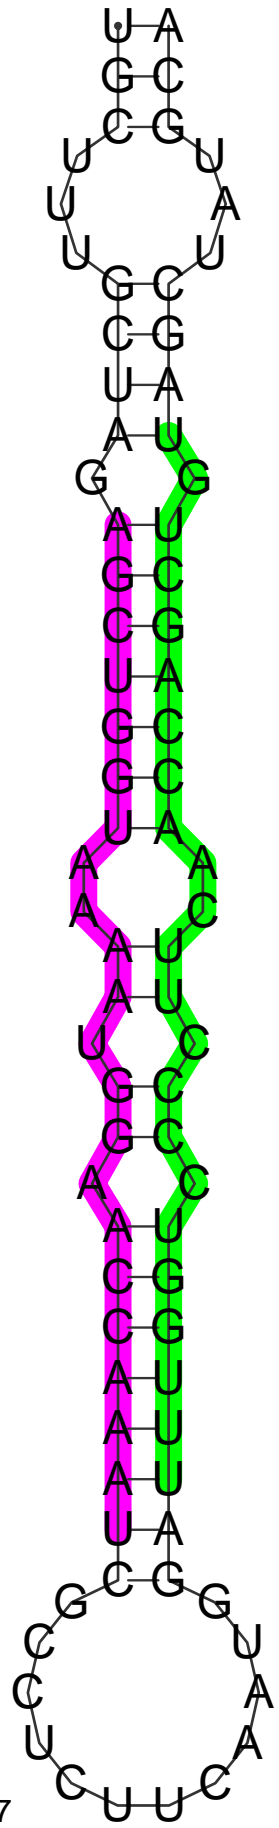

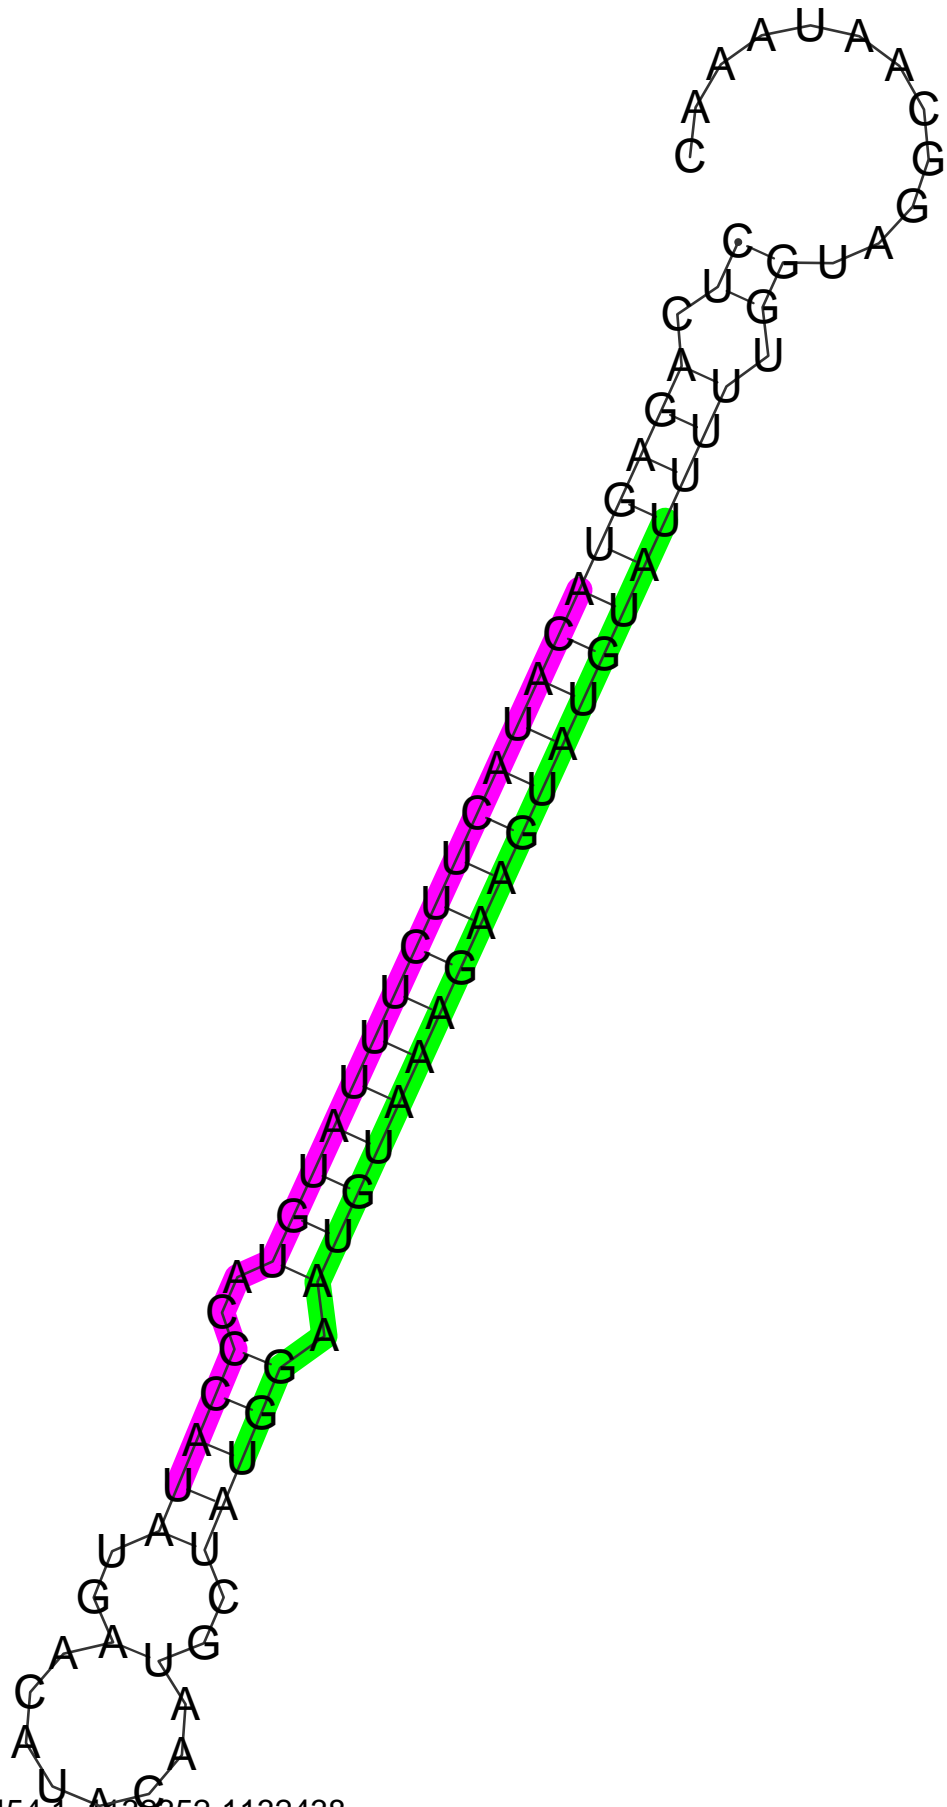

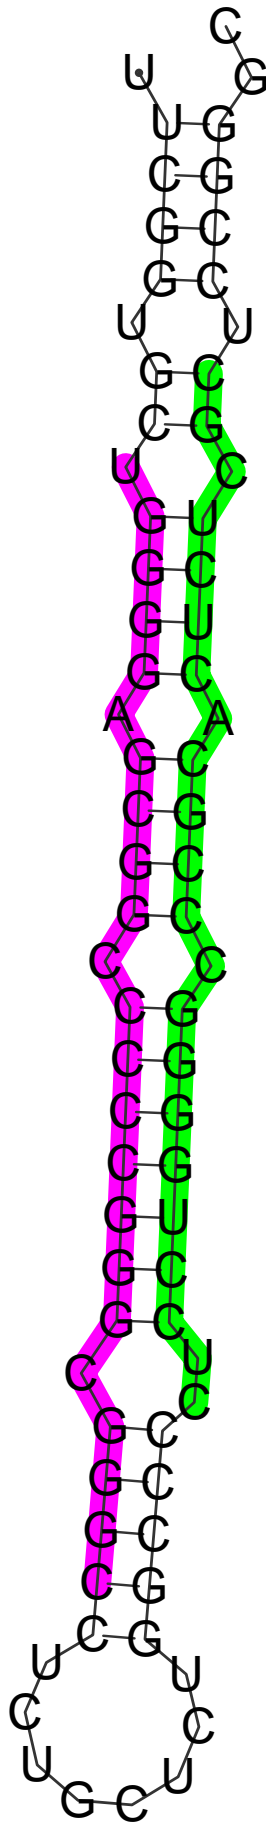

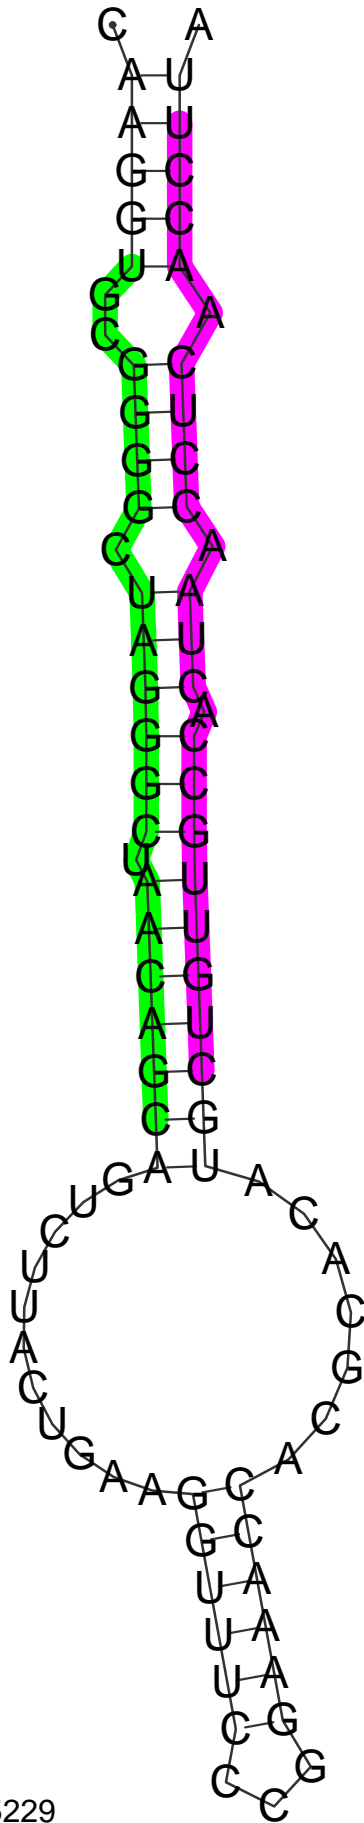

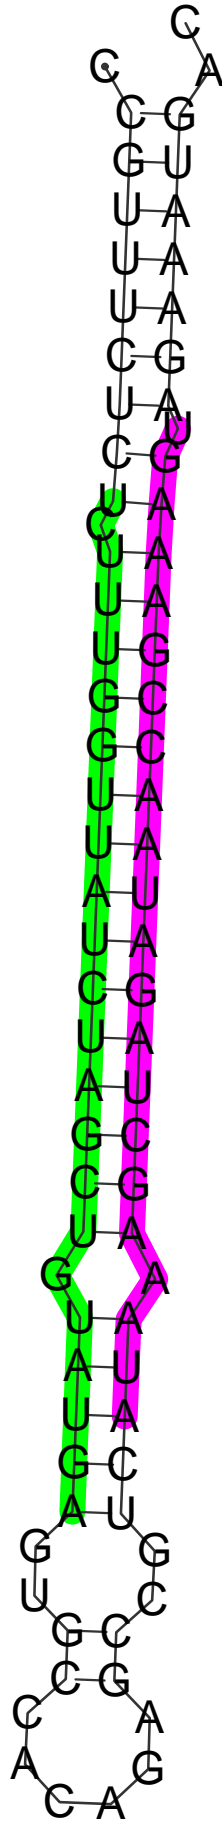

NW\_006383462.1\_54589-54667



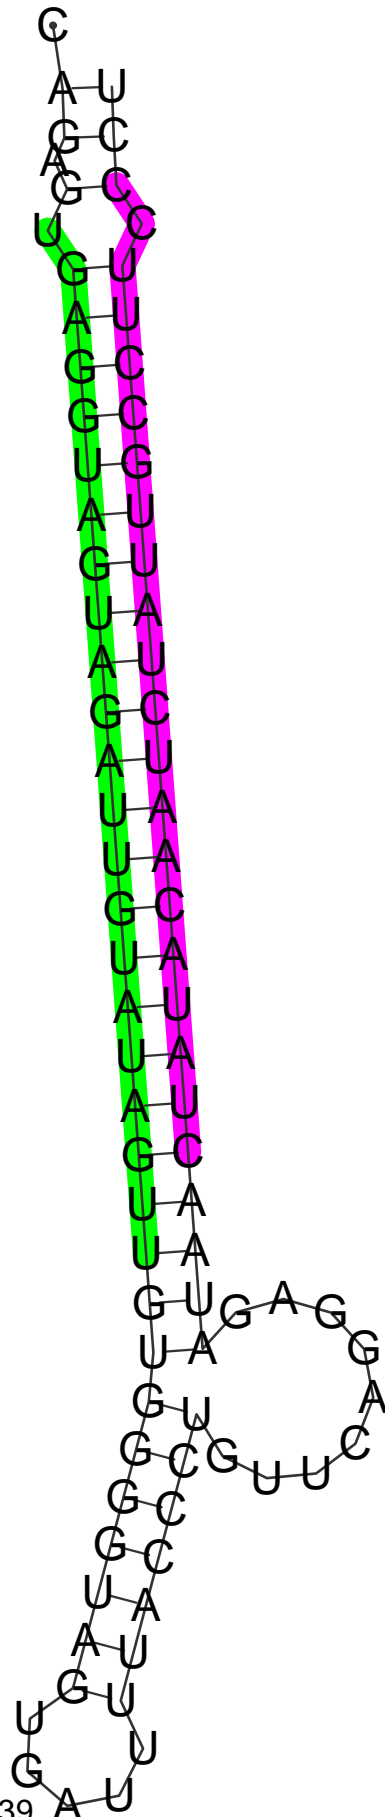





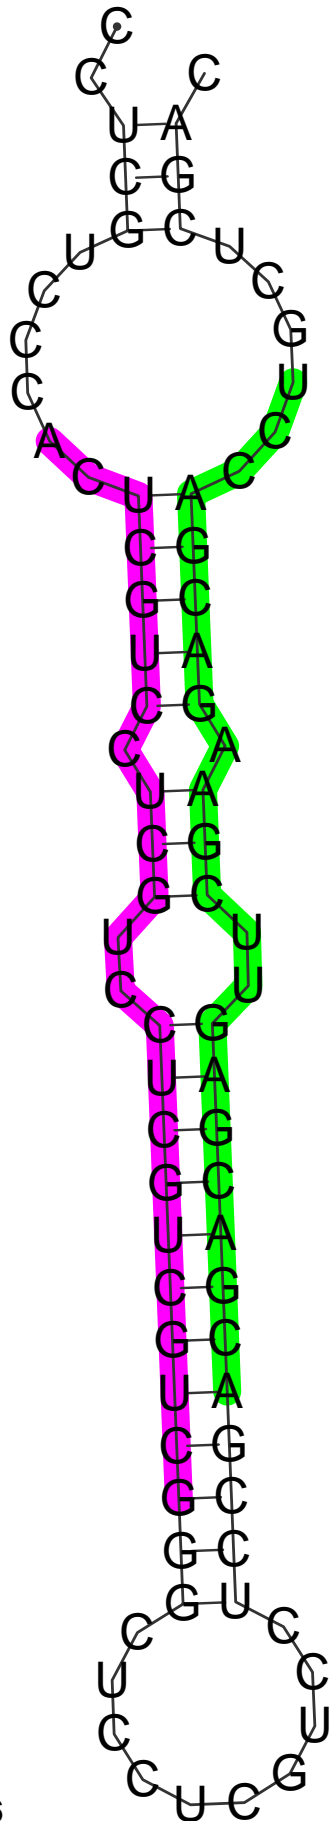

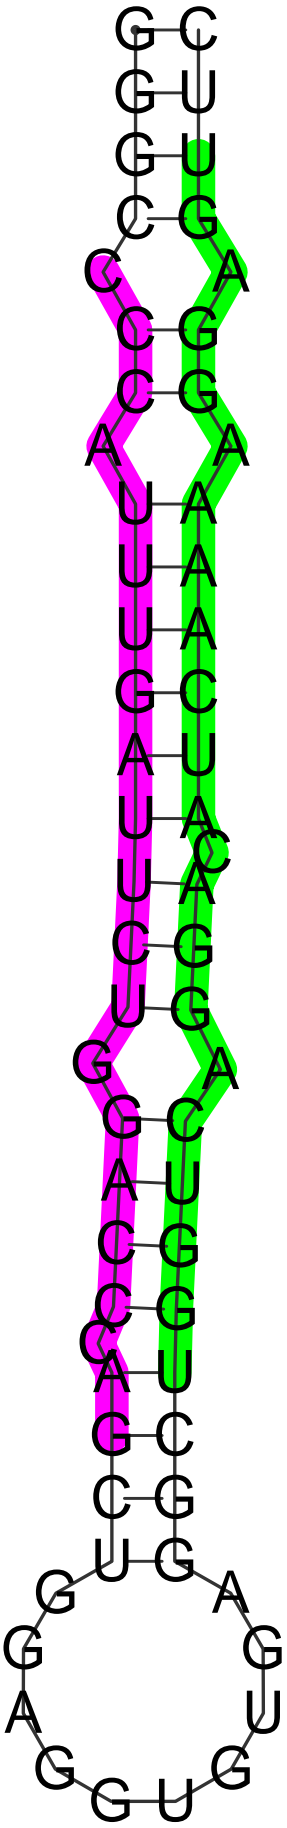

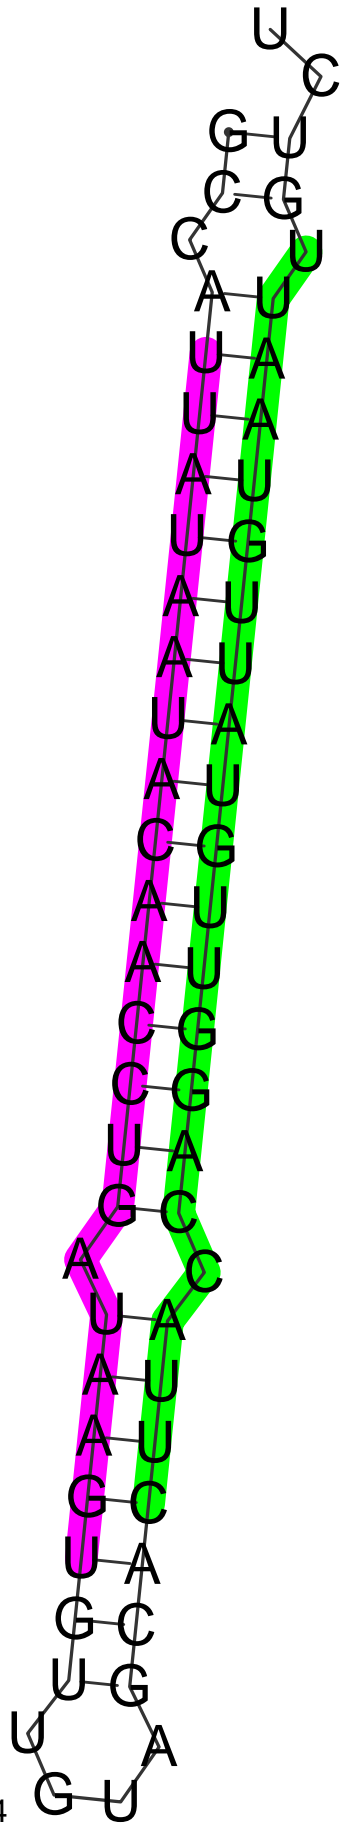

NW\_006383521.1\_425335-425394

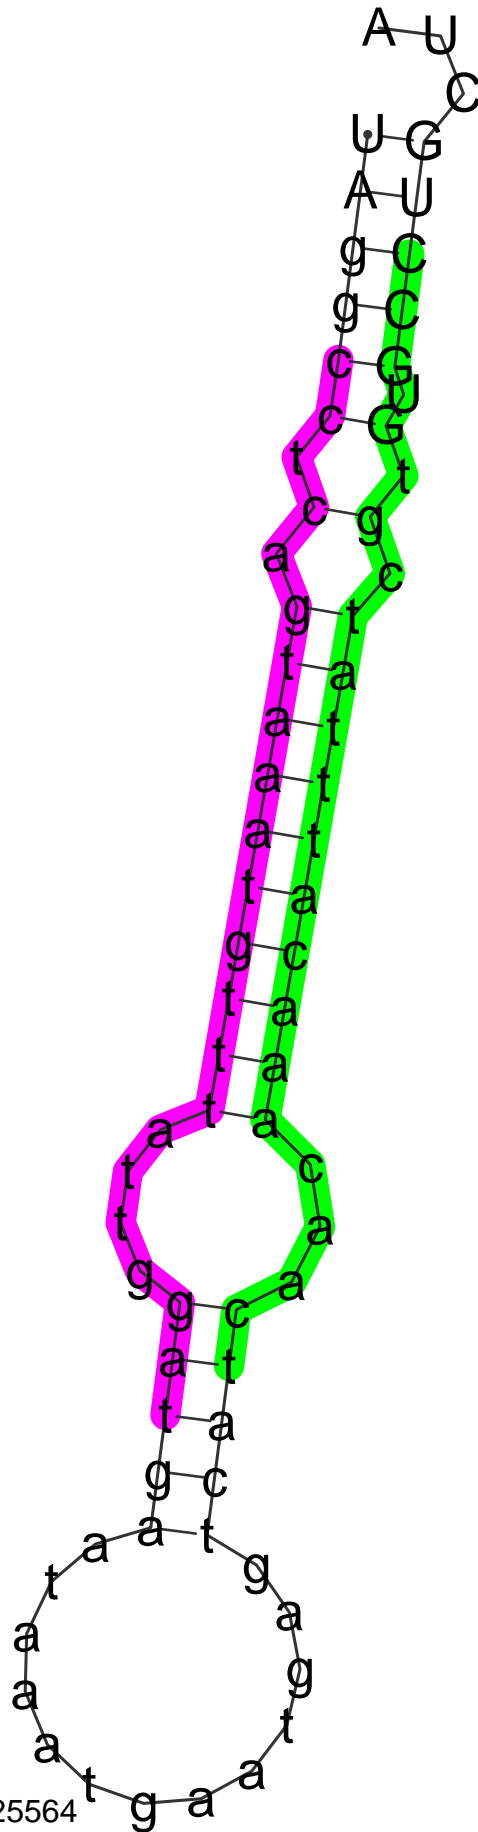

NW\_006383521.1\_425493-425564

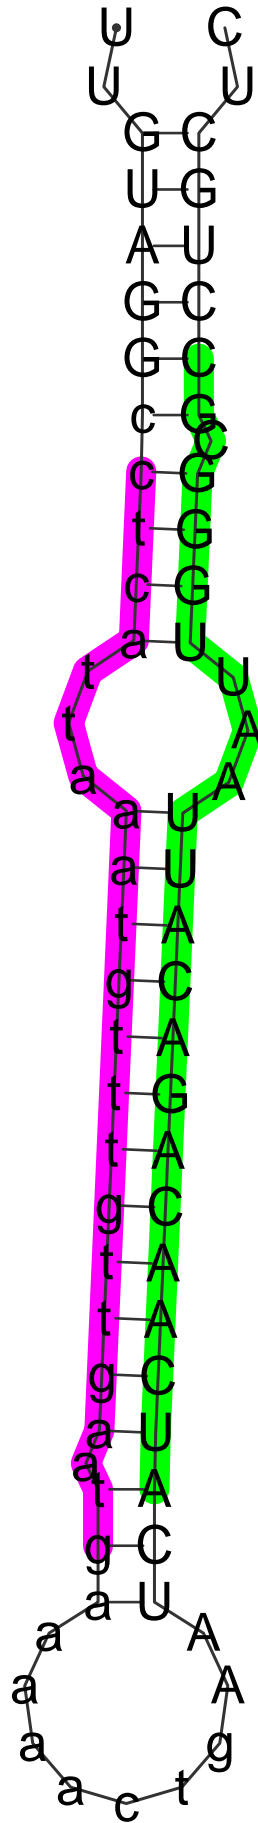

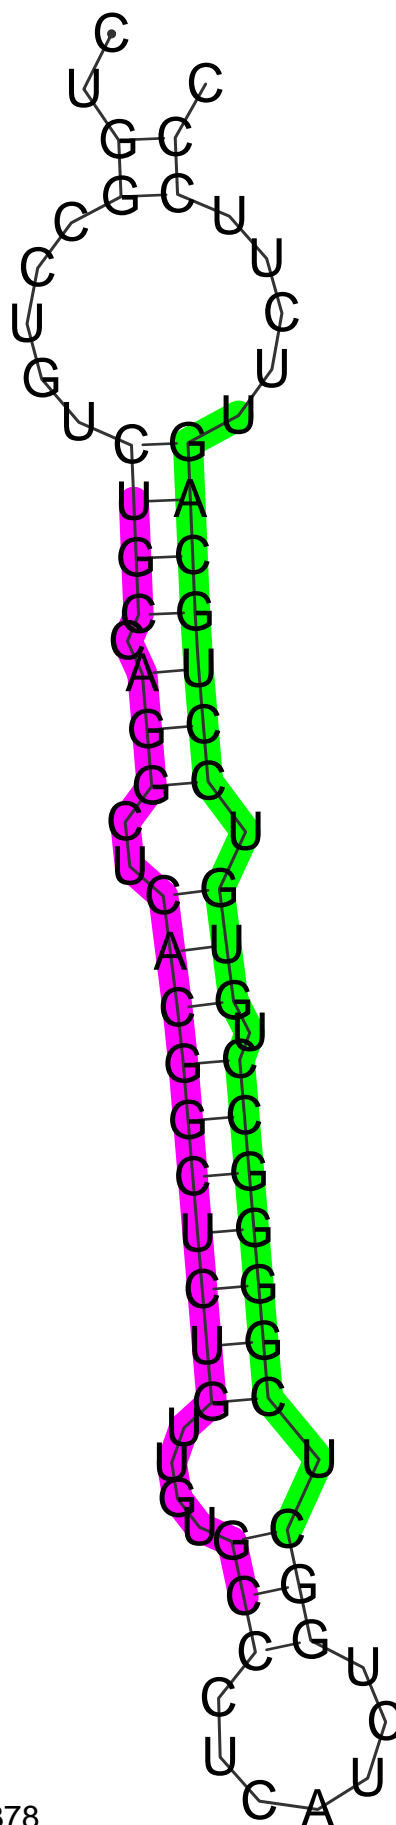







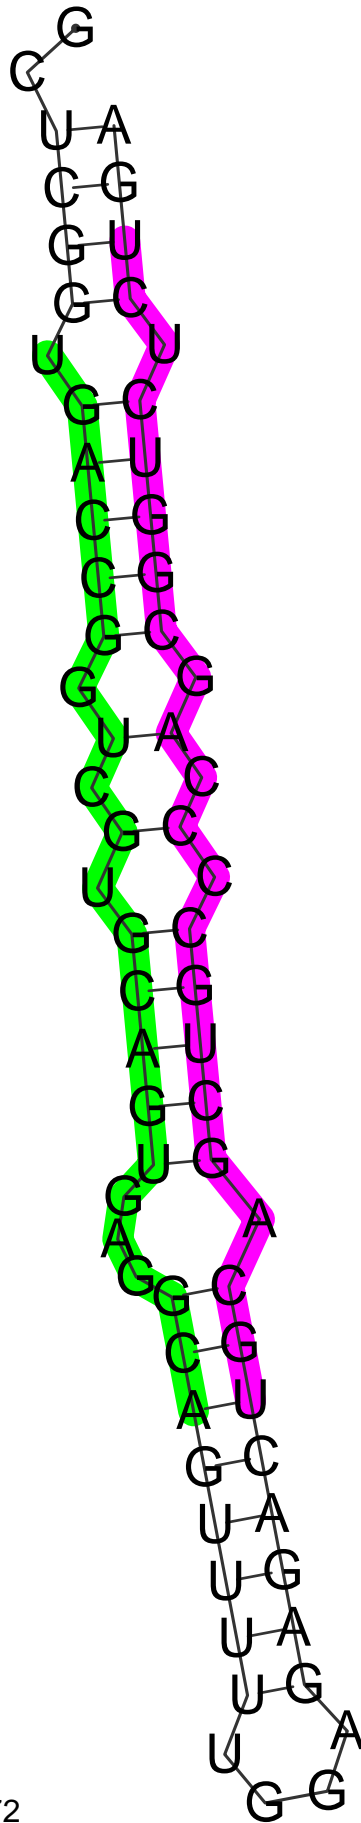



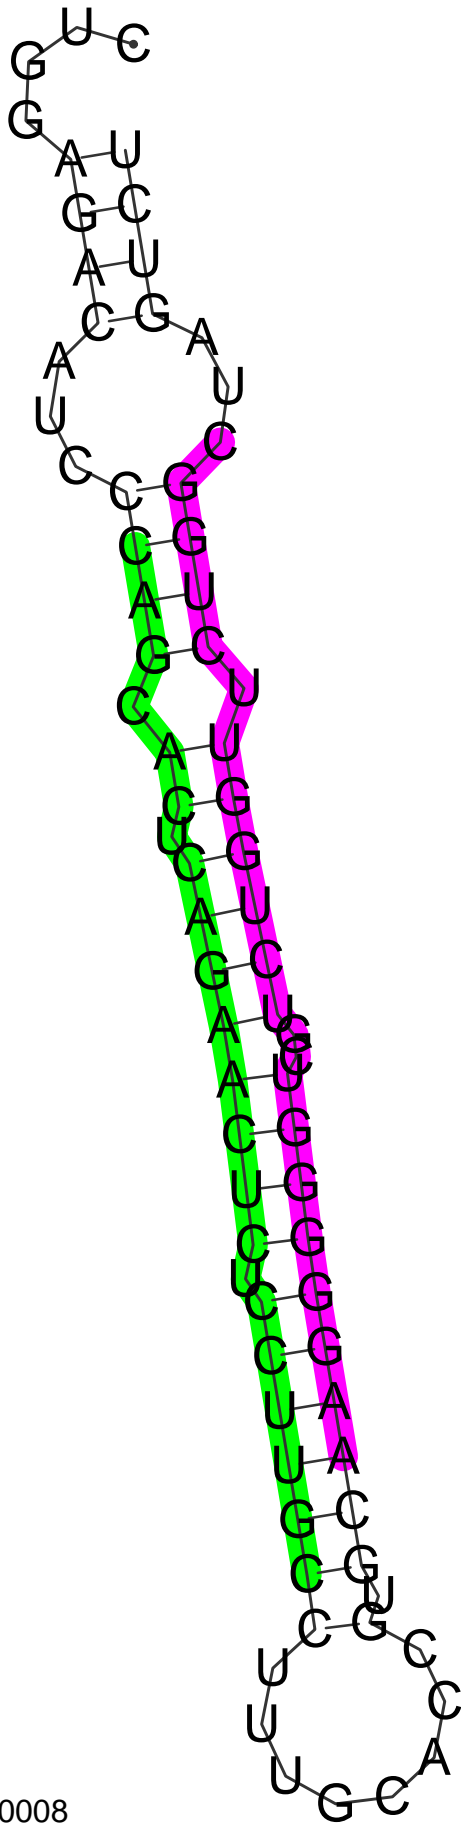

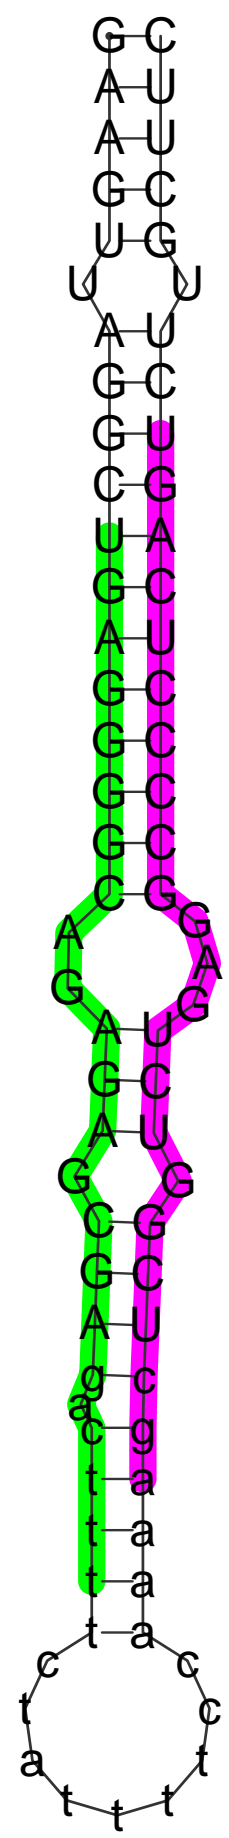







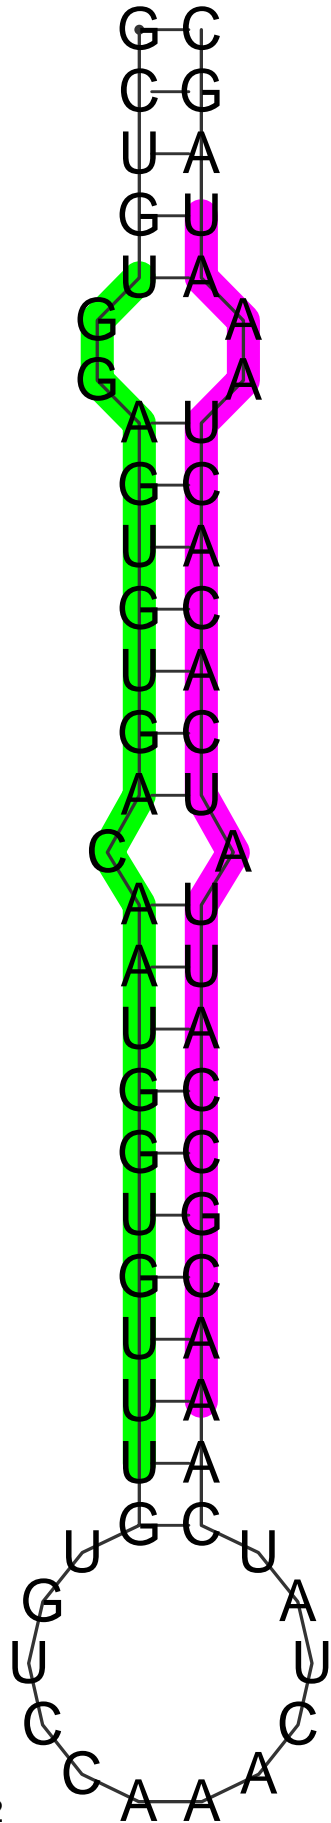

NW\_006383633.1\_394069-394132



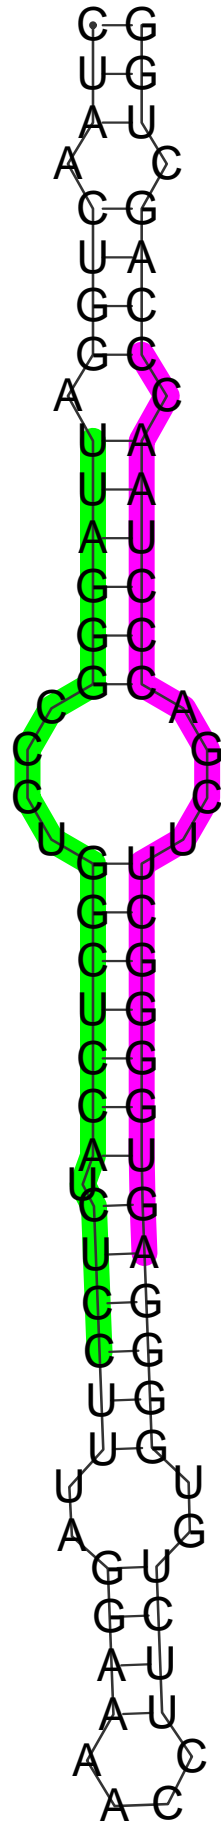

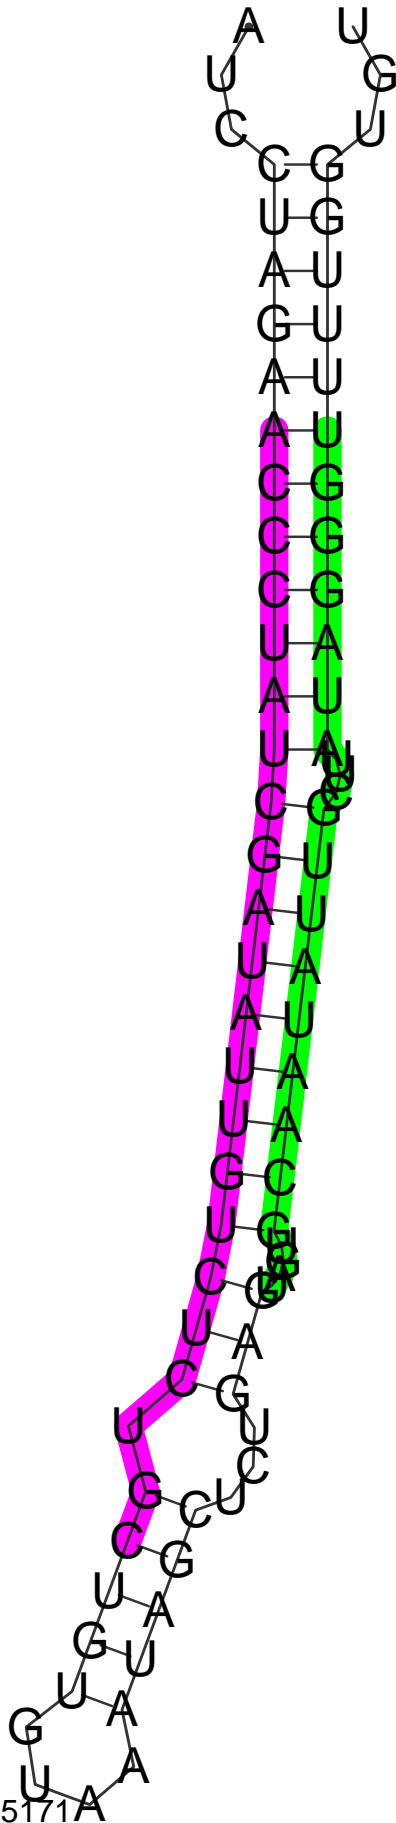

NW\_006383655.1\_1035093-1035171A

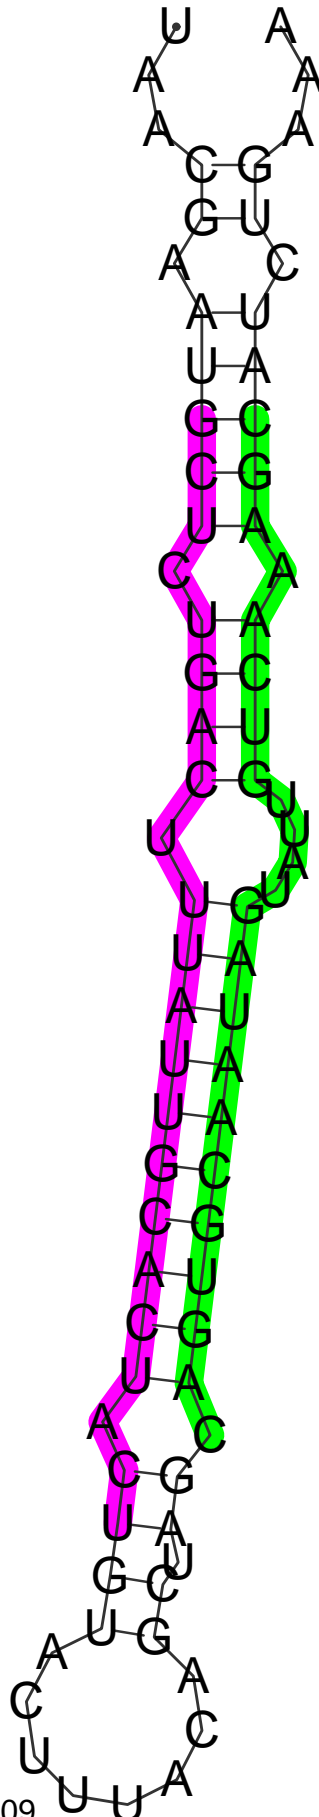

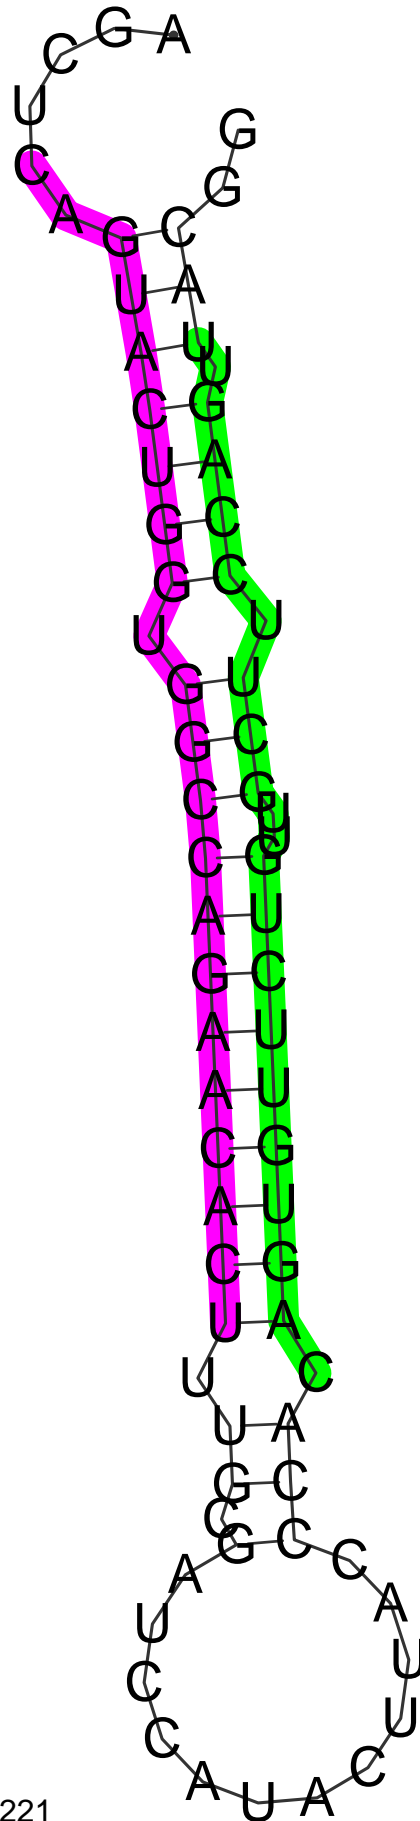



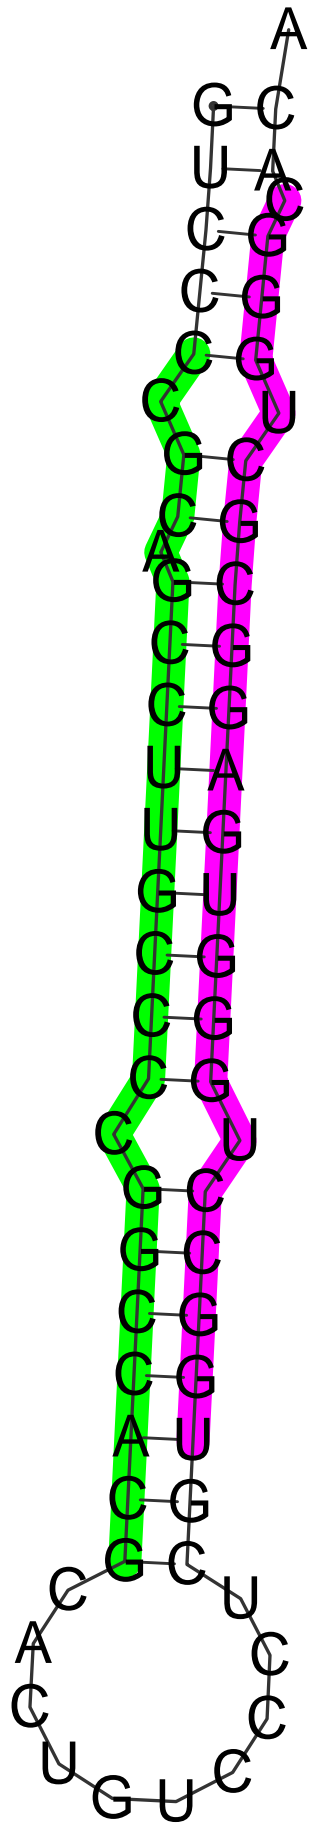

NW\_006383707.1\_391890-391952

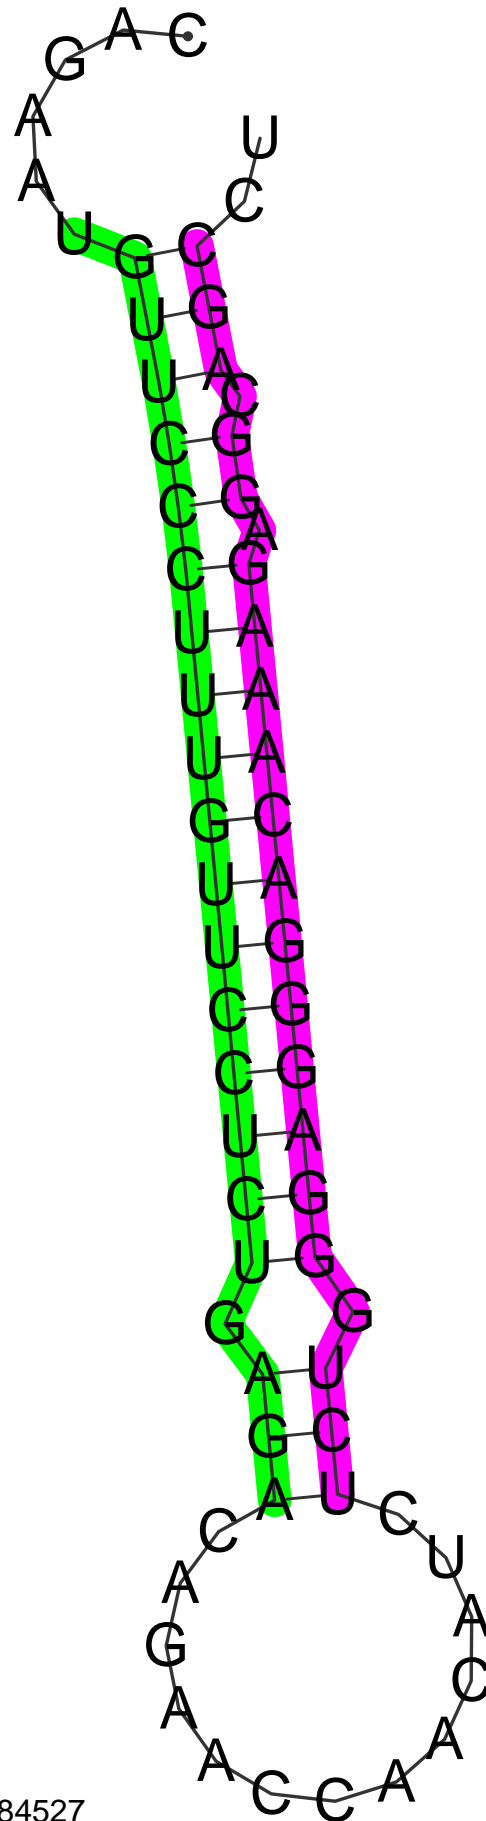









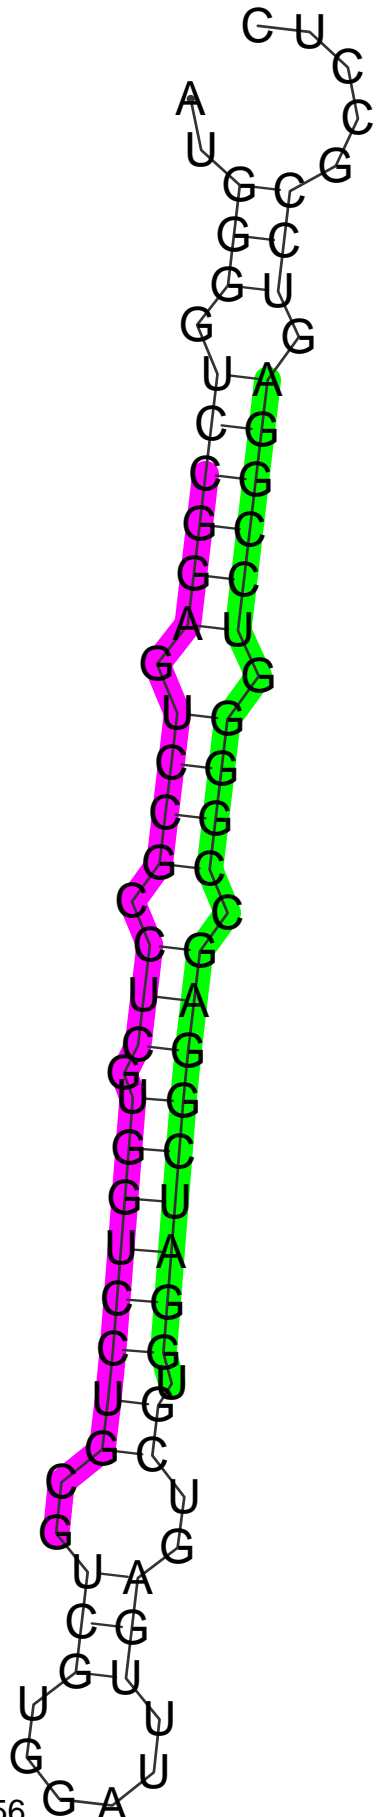

NW\_006383782.1\_339578-339656

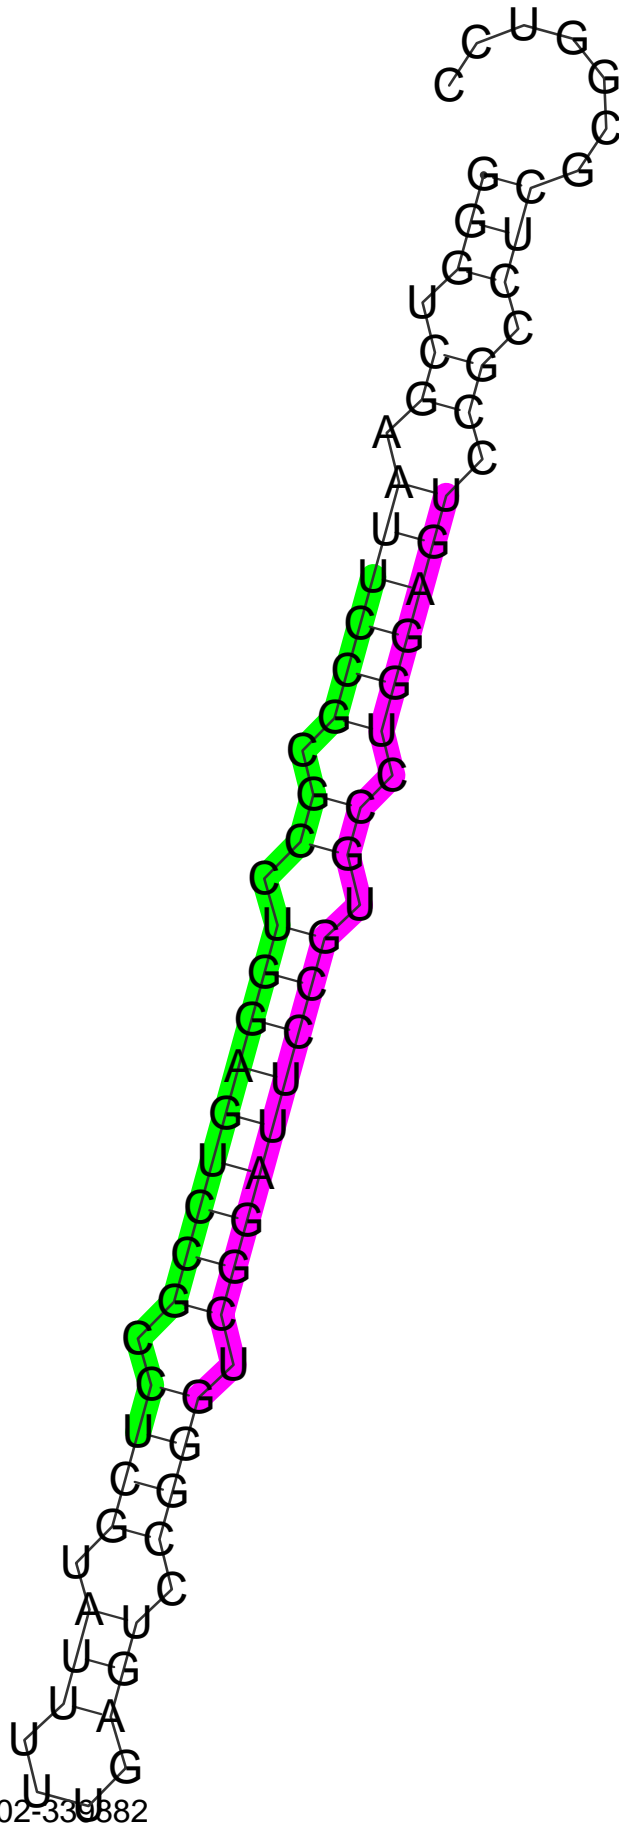

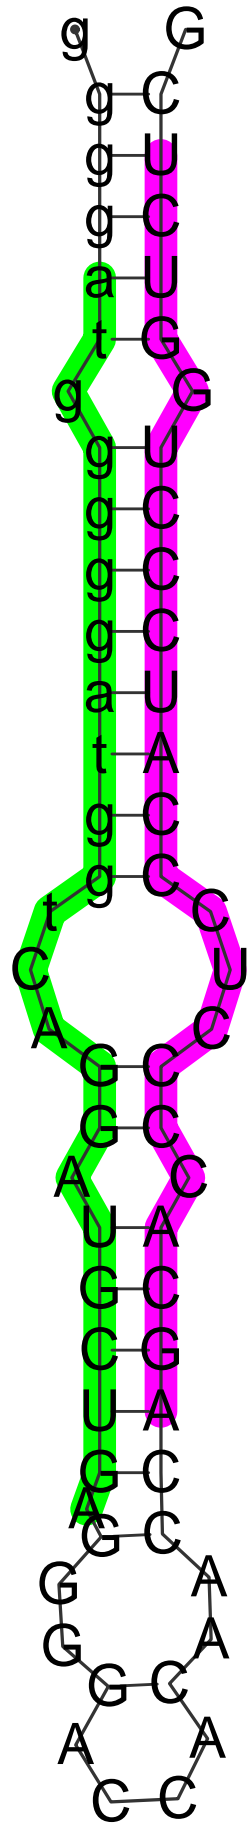

NW\_006383788.1\_911387-911451

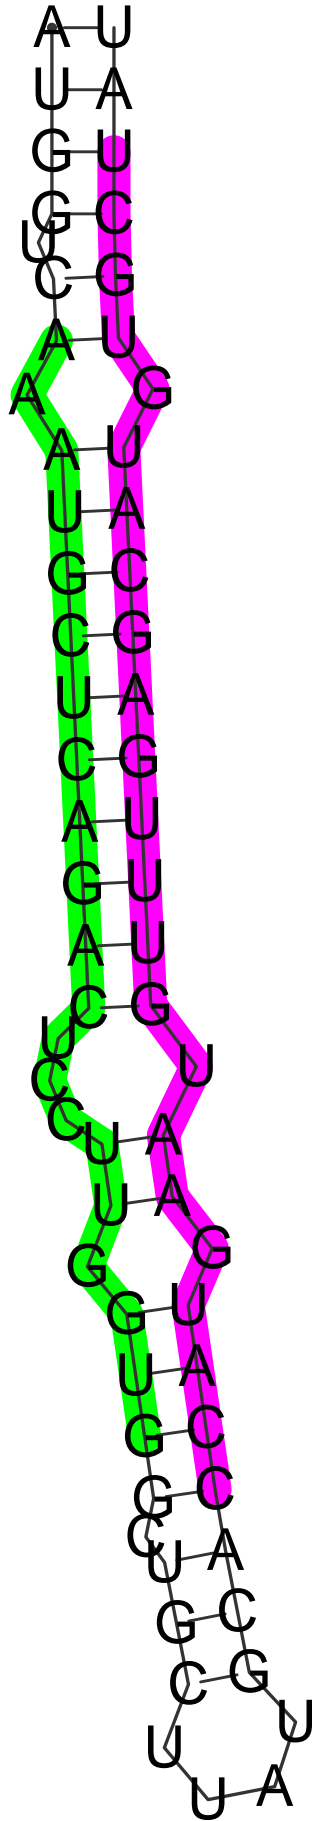



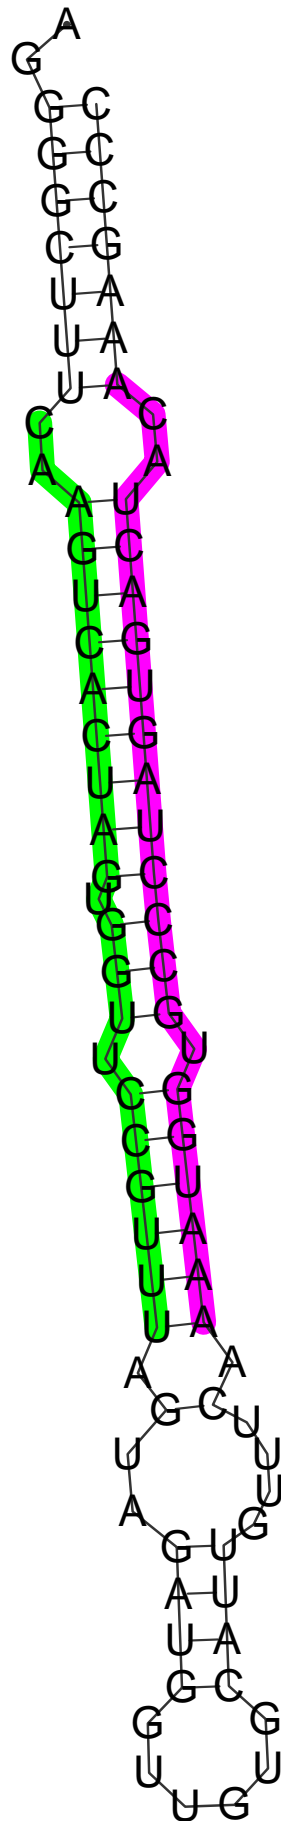





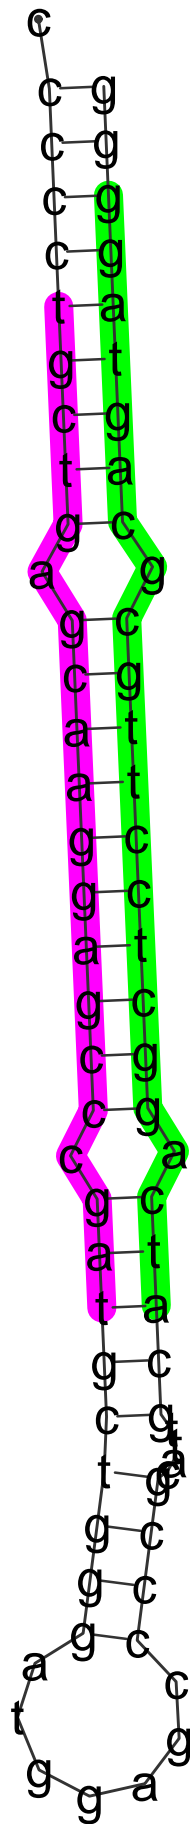















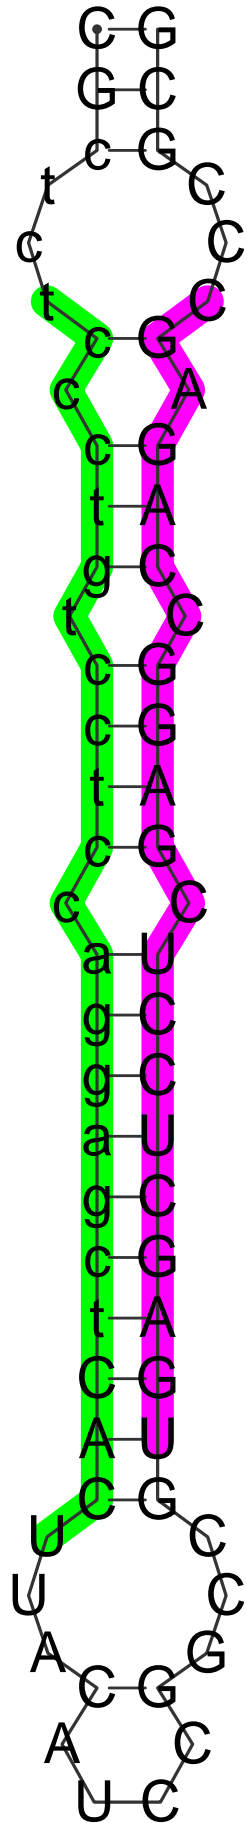

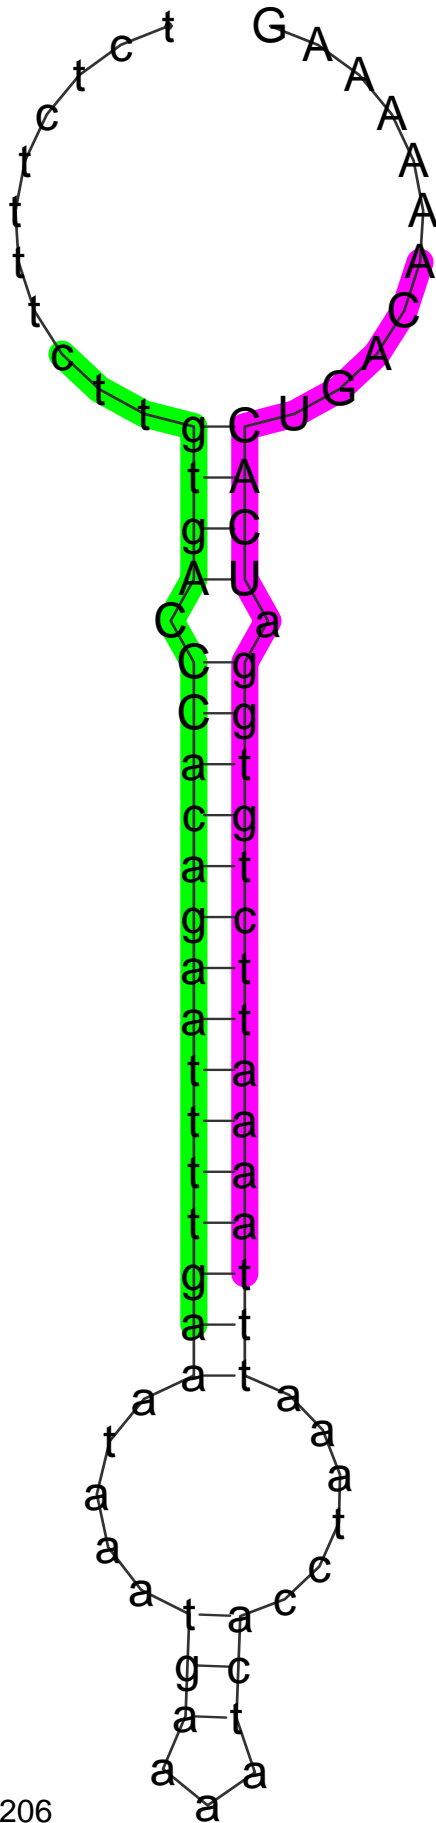



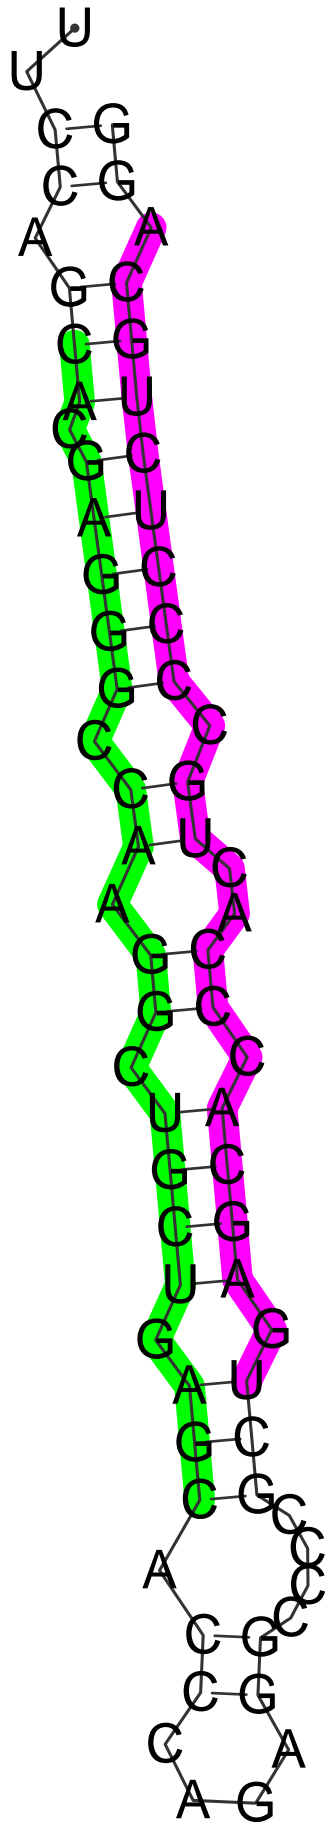



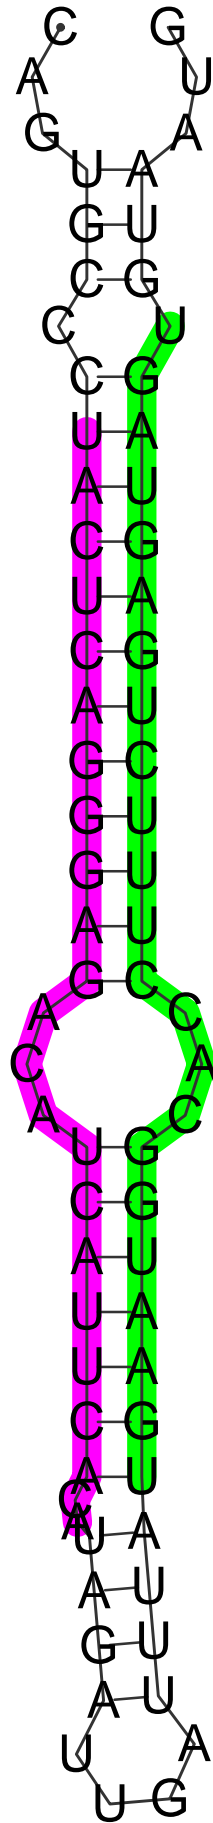



























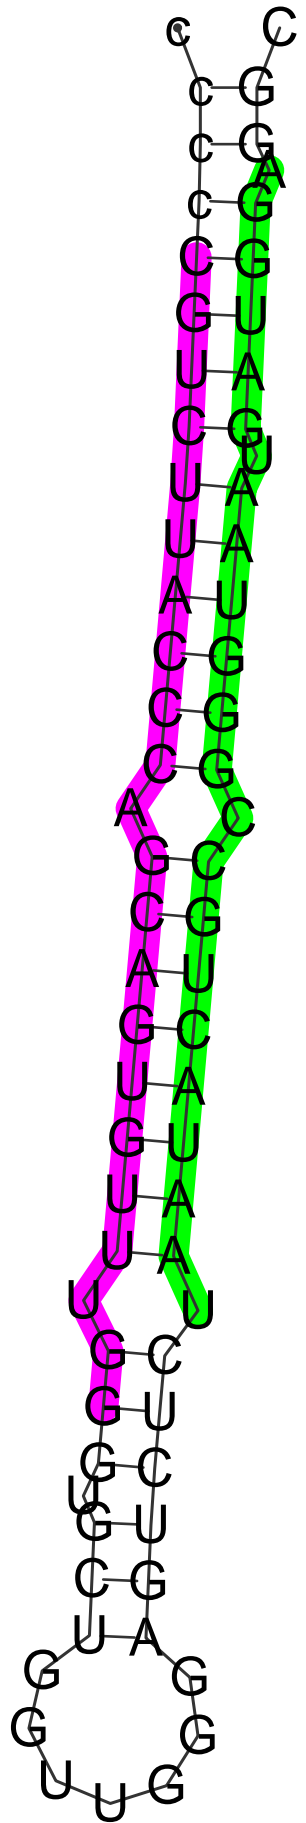



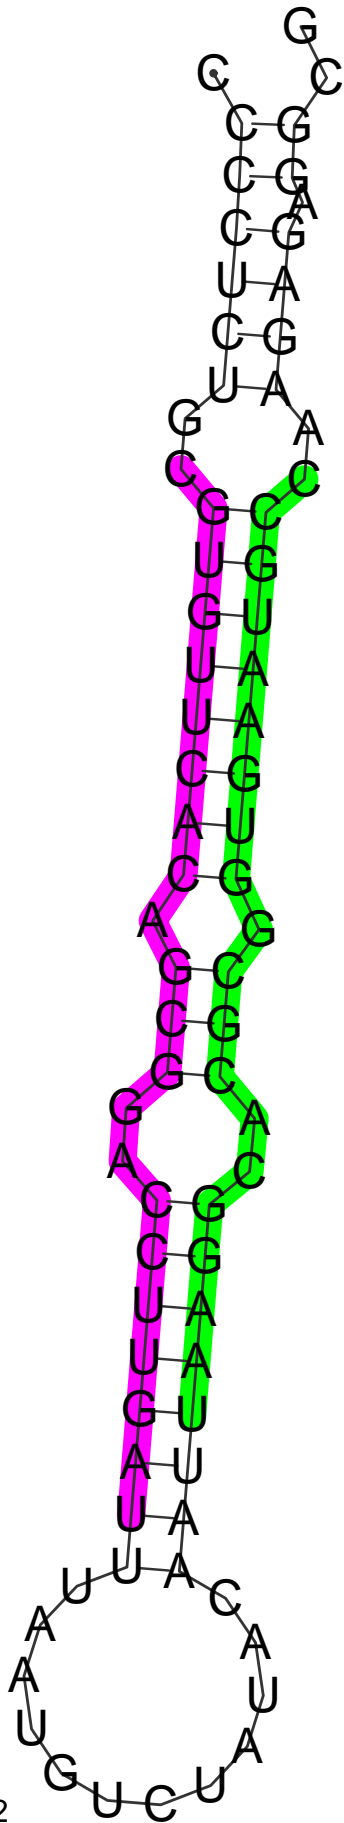

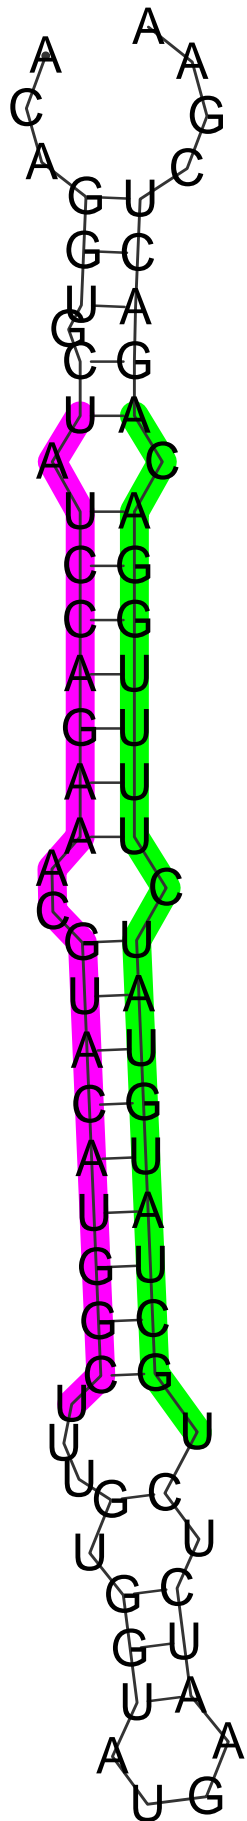

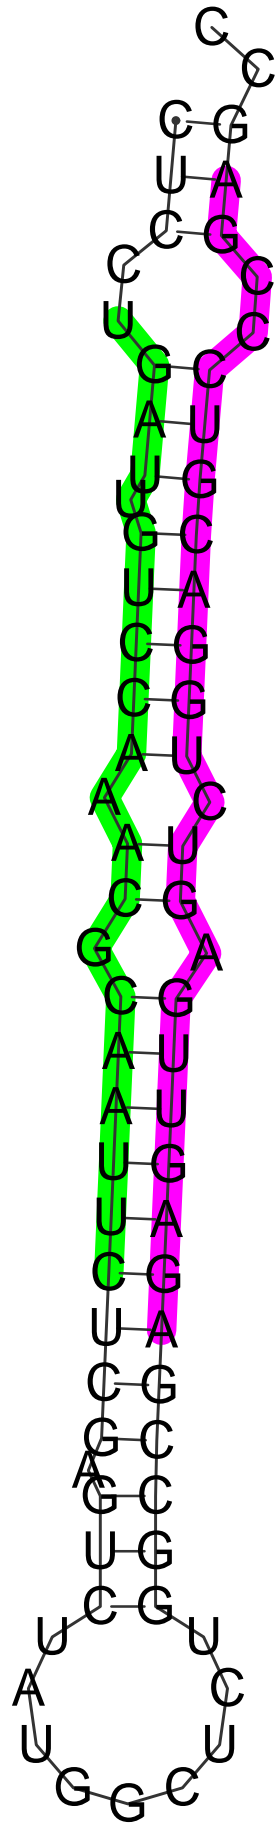

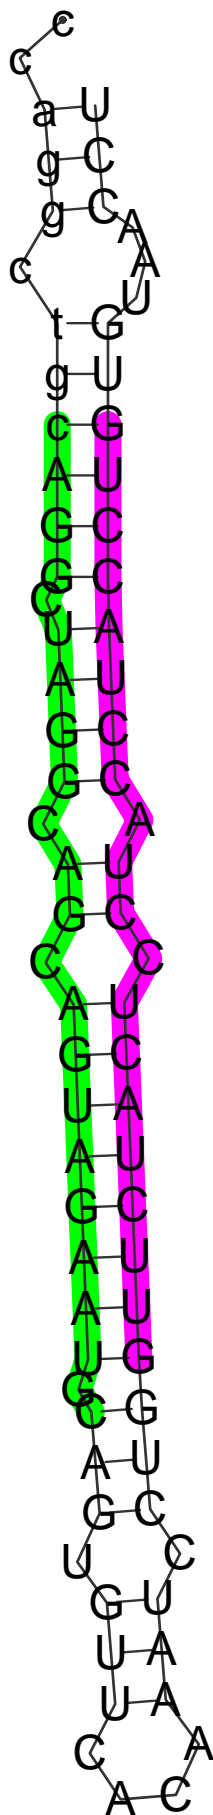

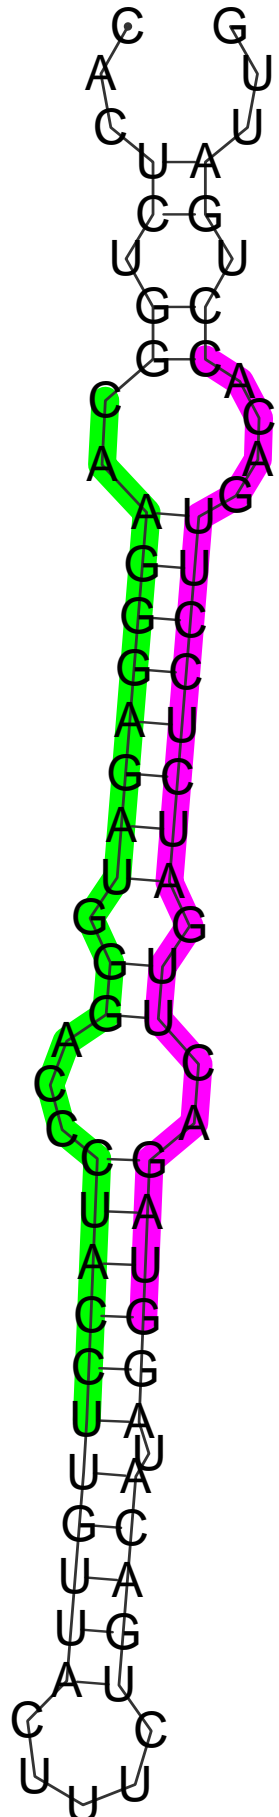





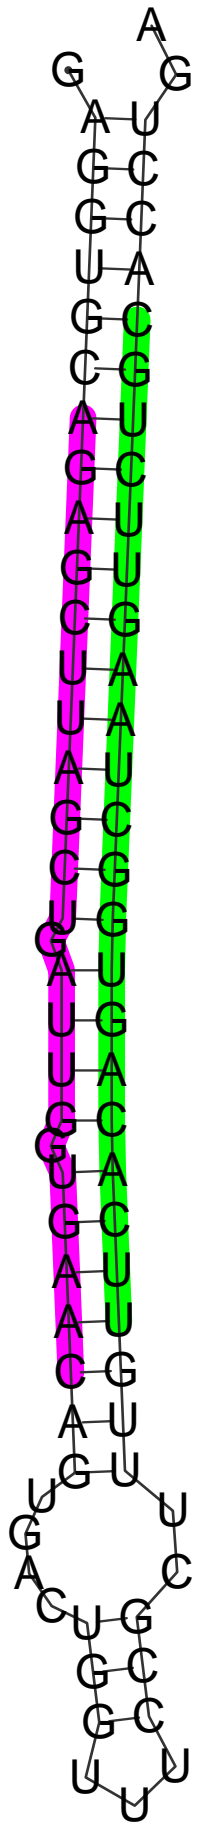



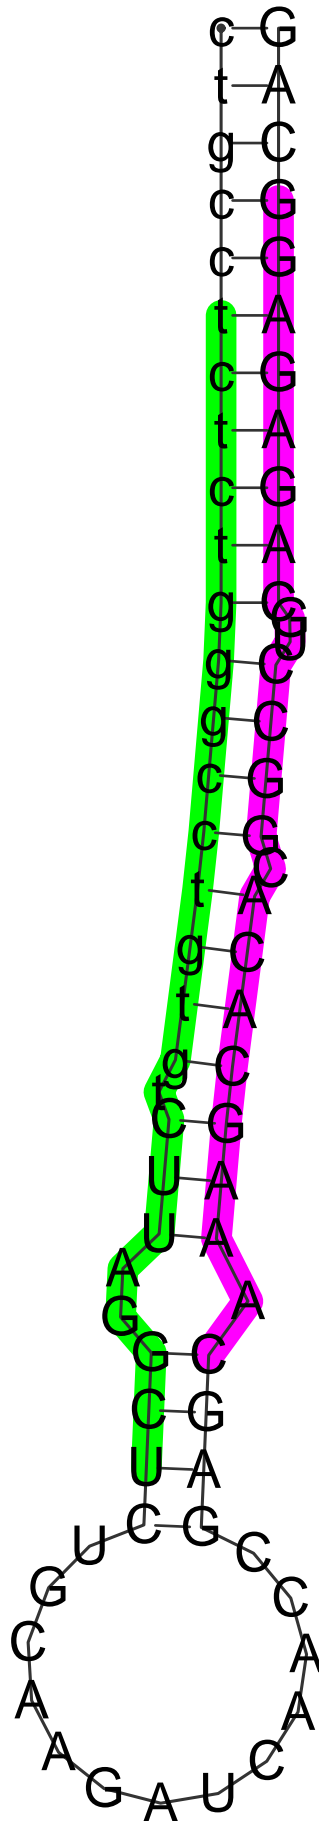

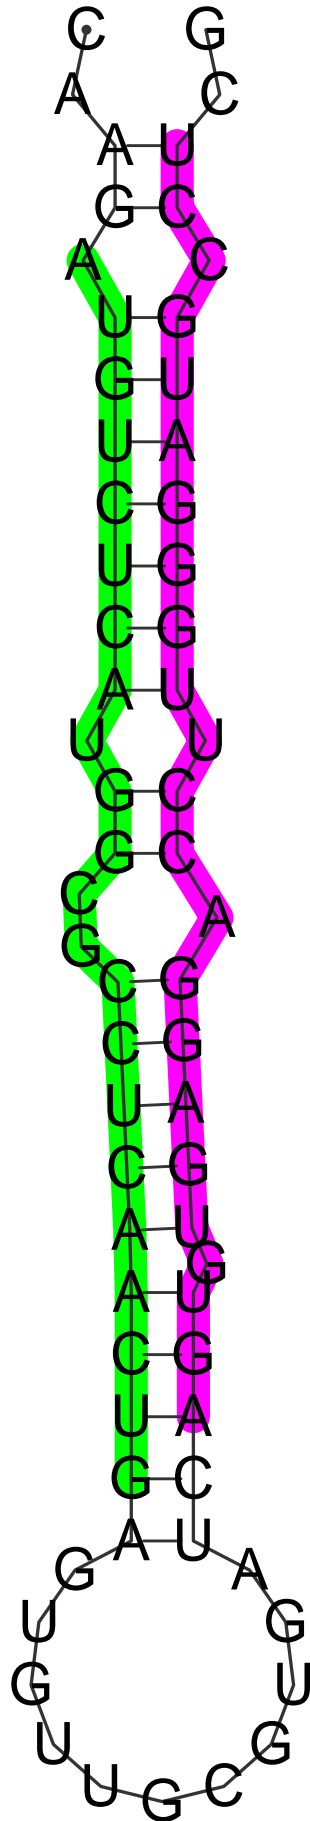



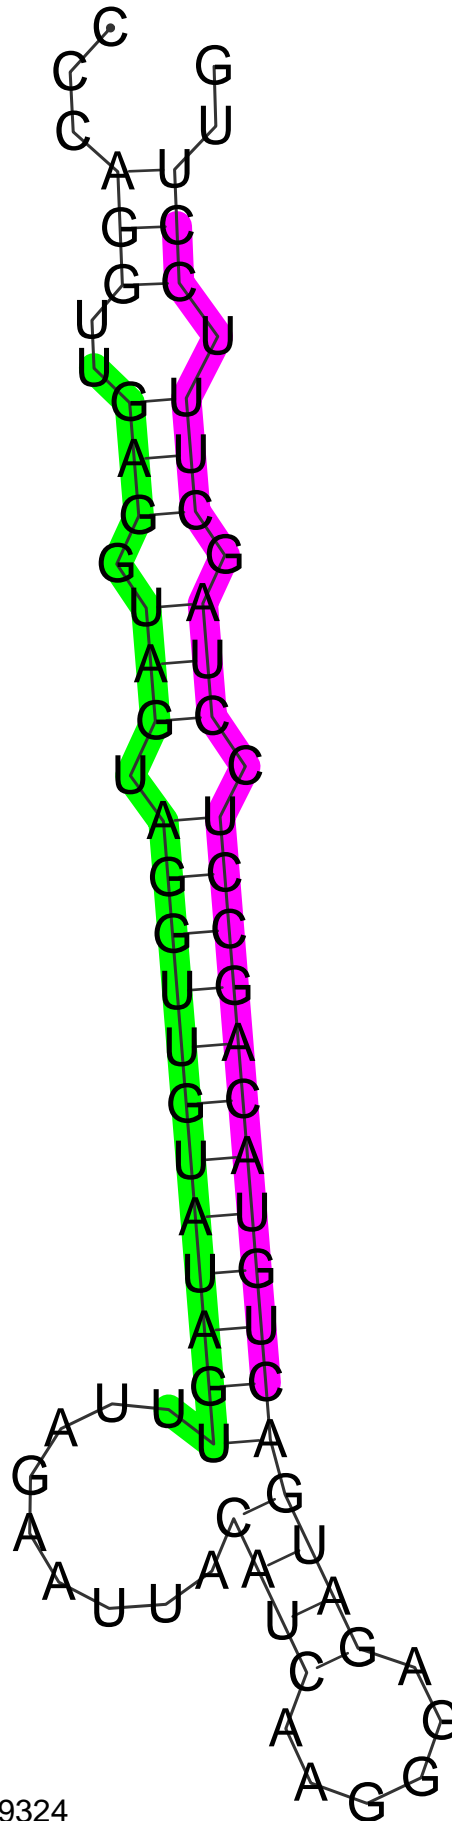

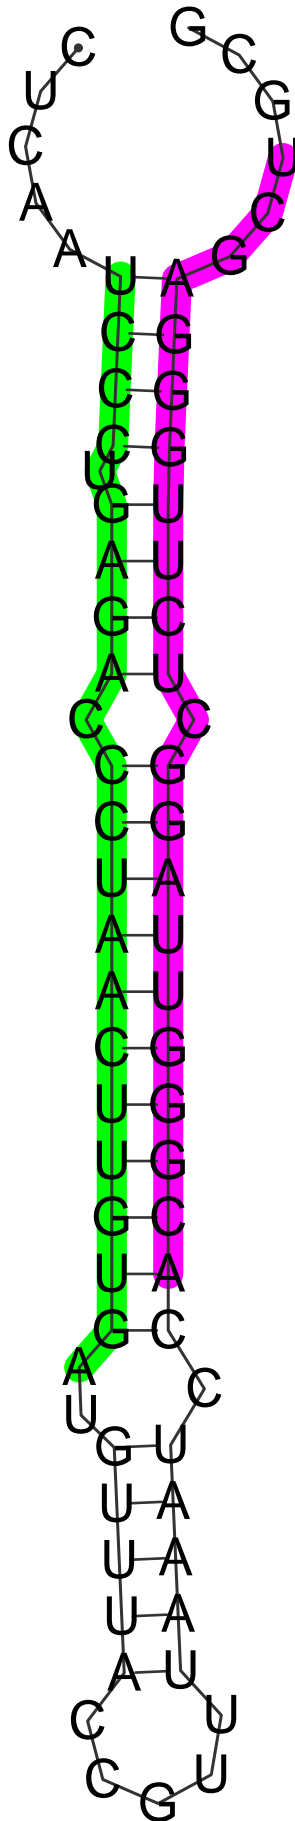



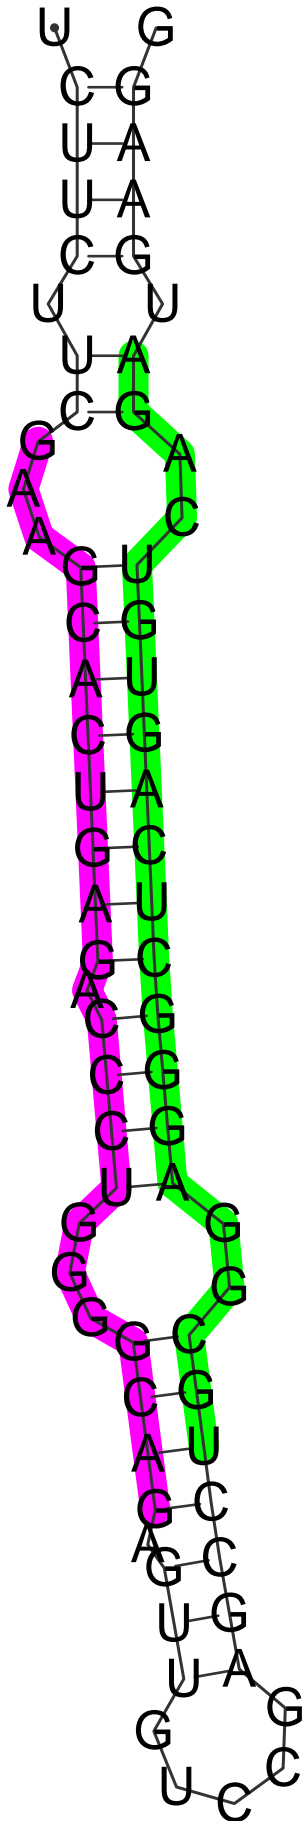

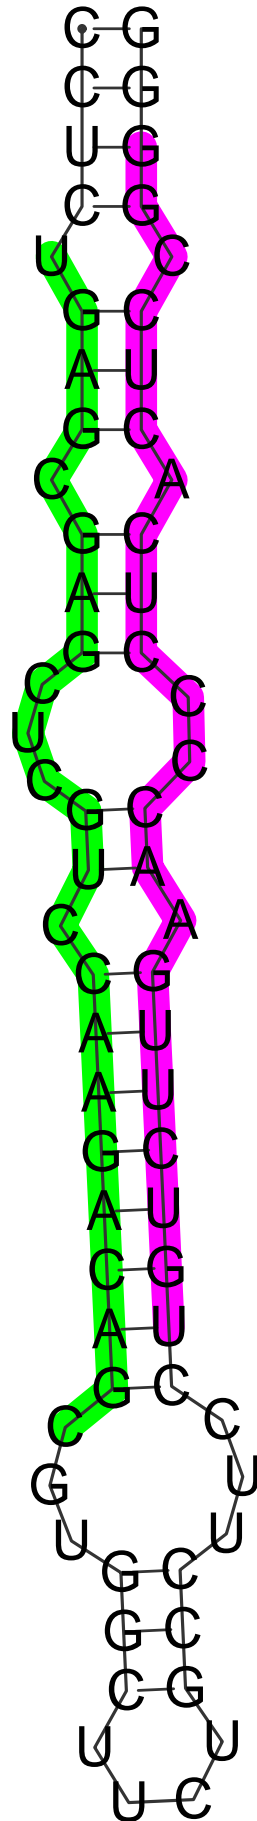





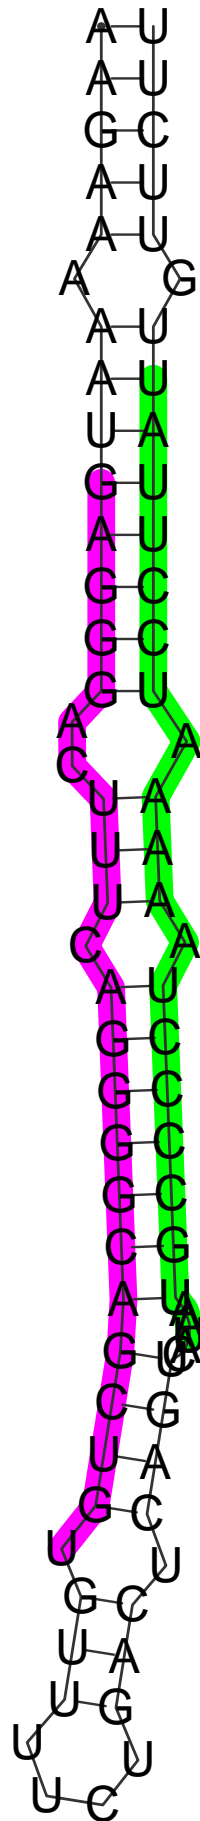



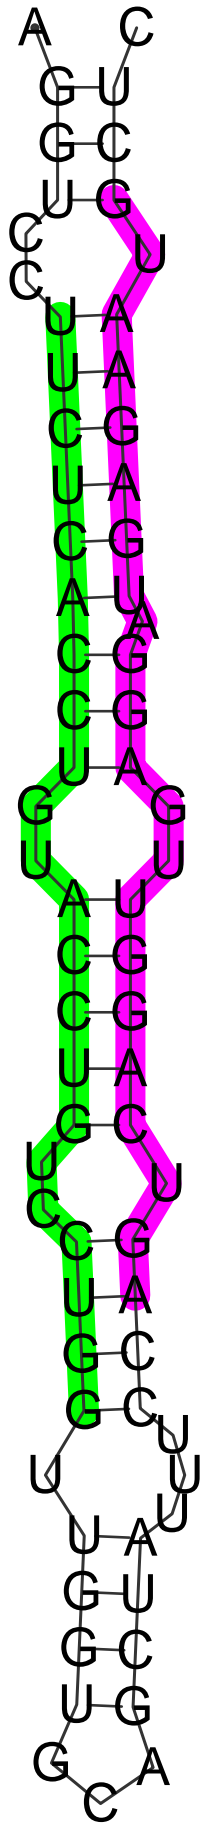

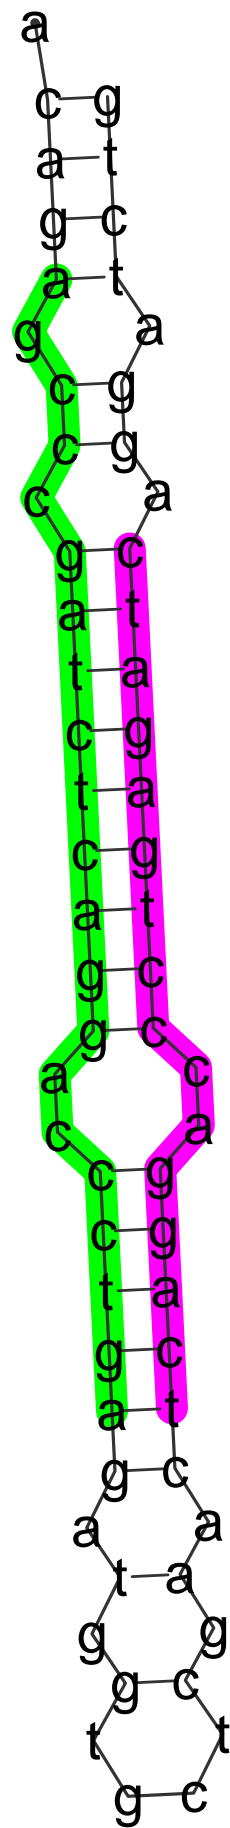



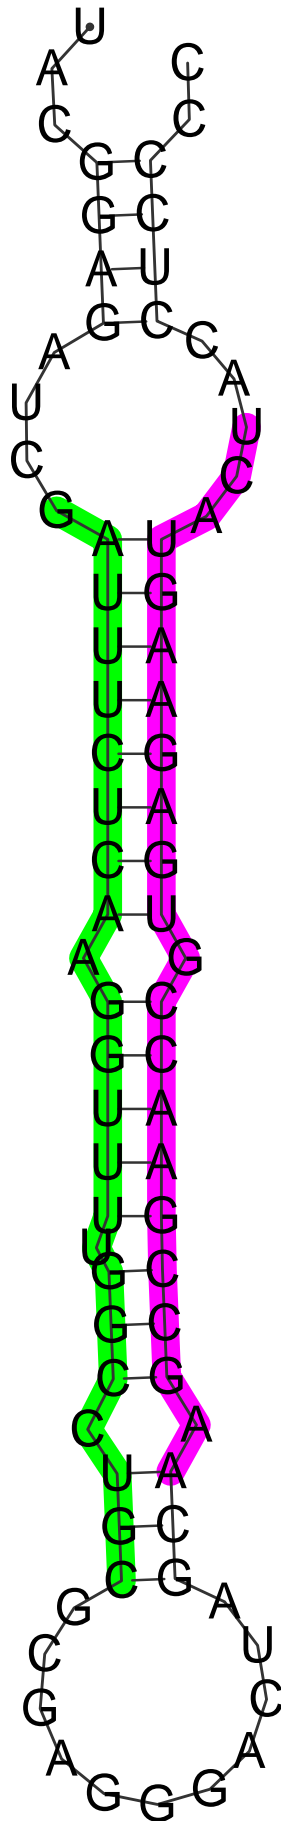

NW\_006384057.1\_635557-635632





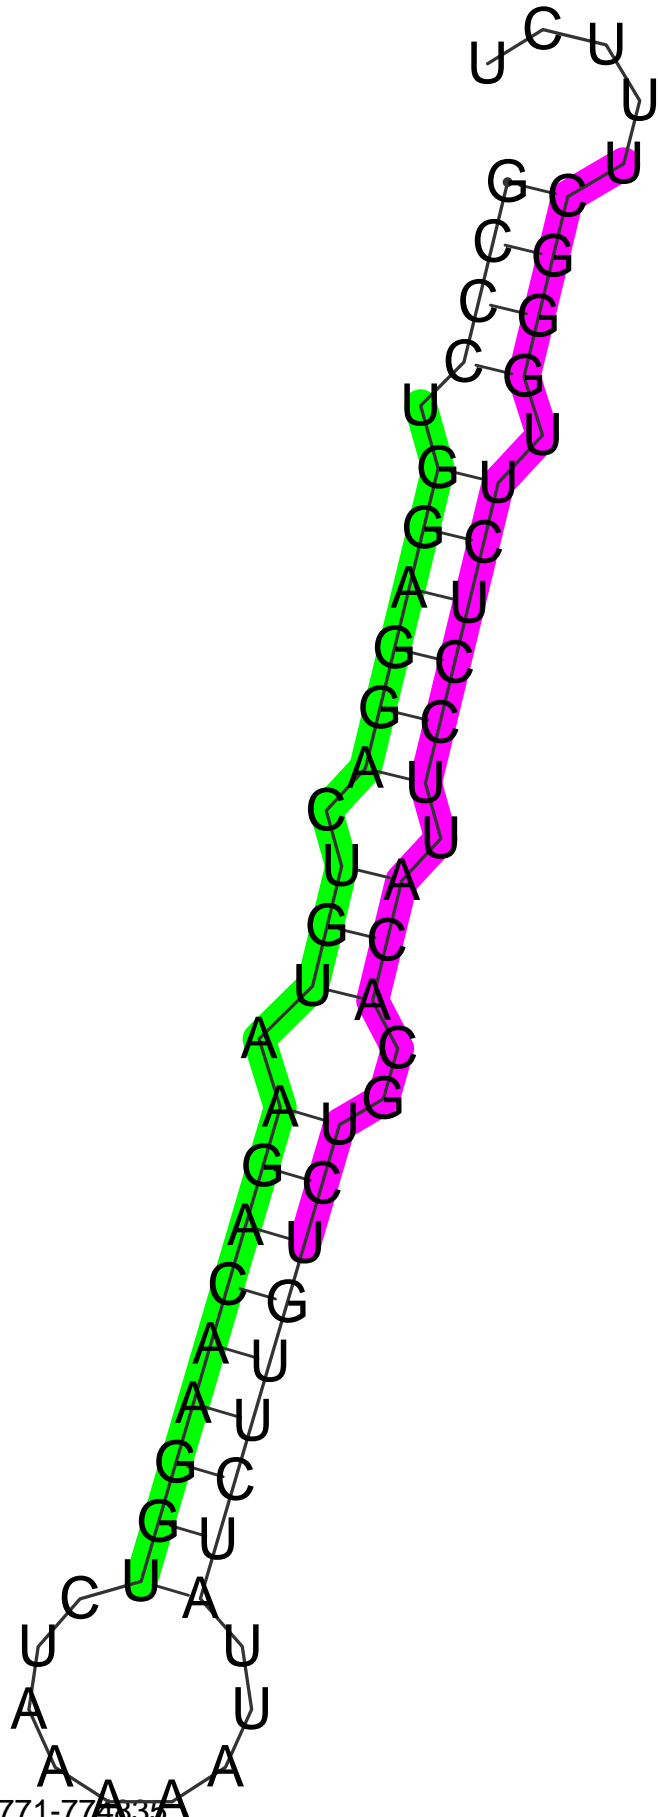

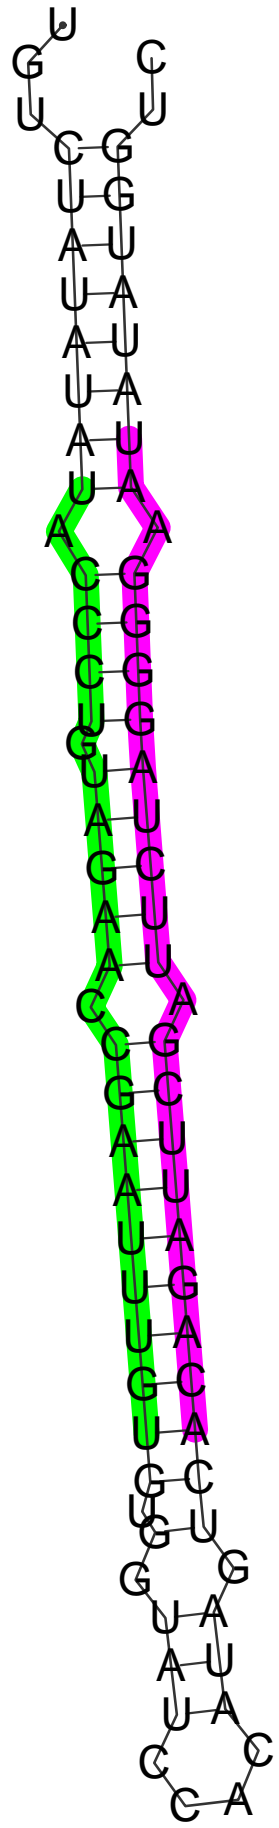

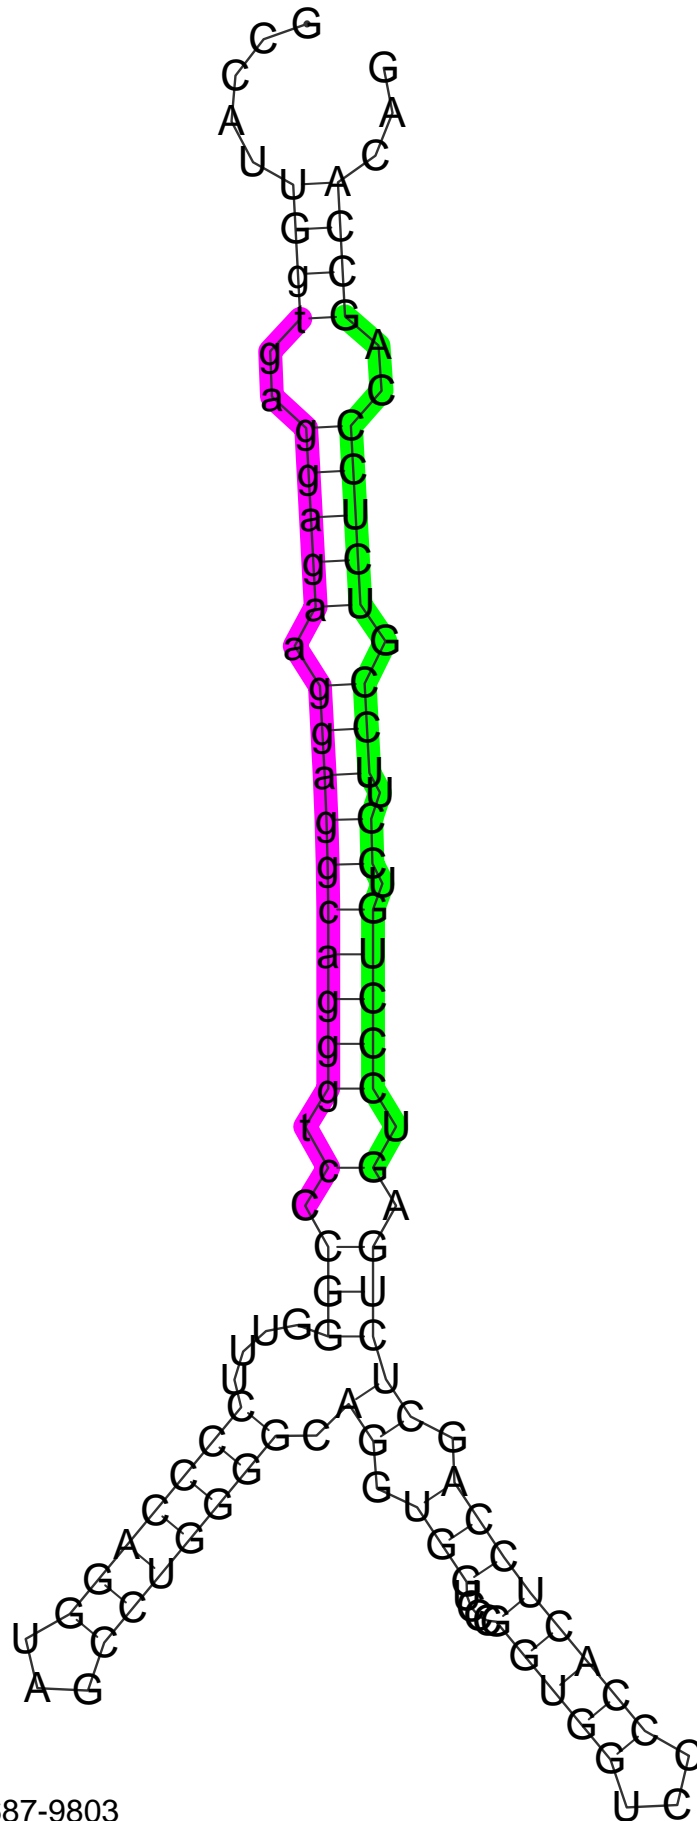

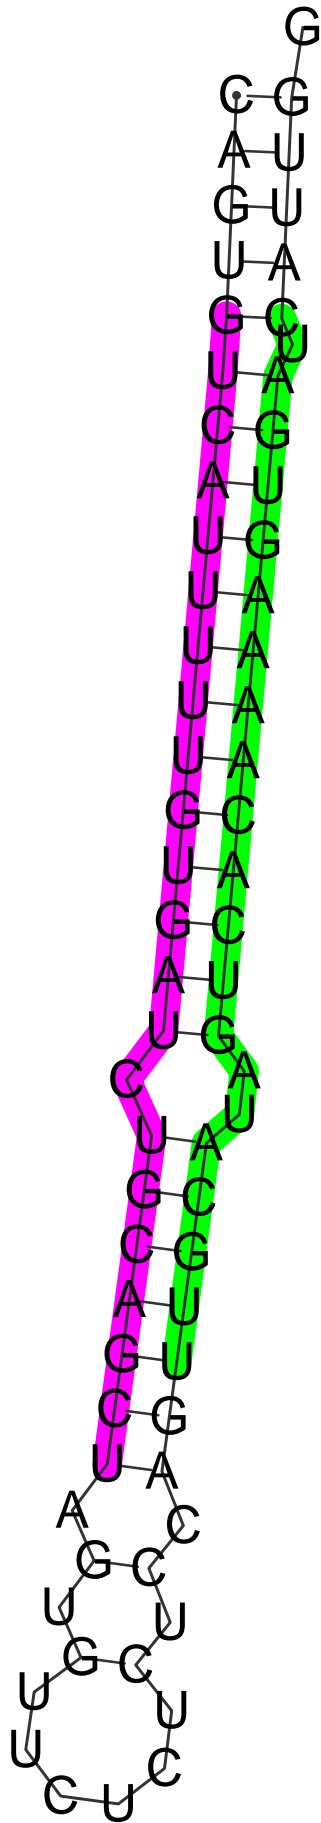















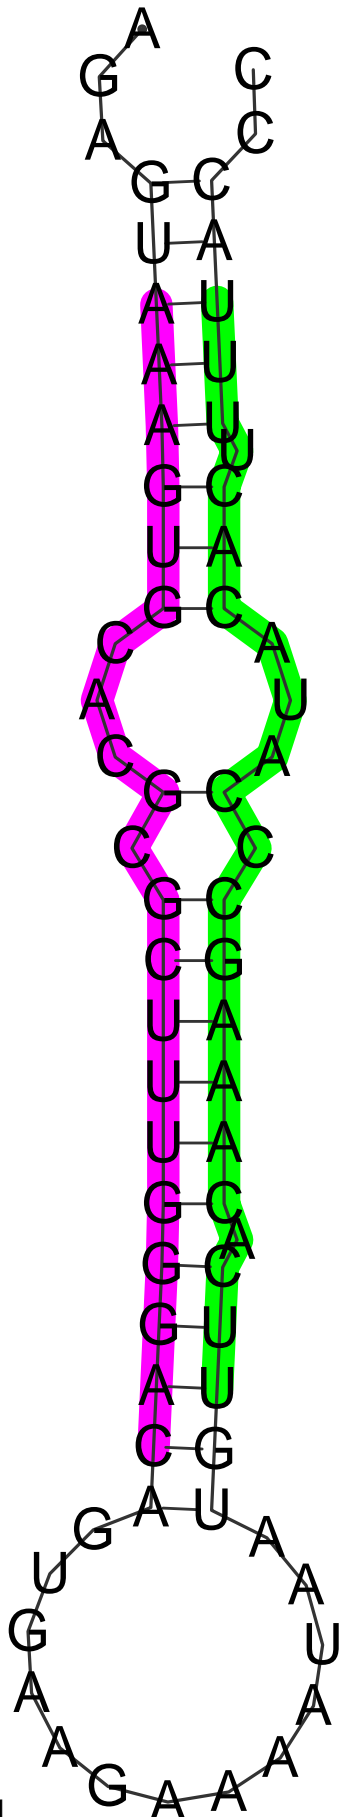















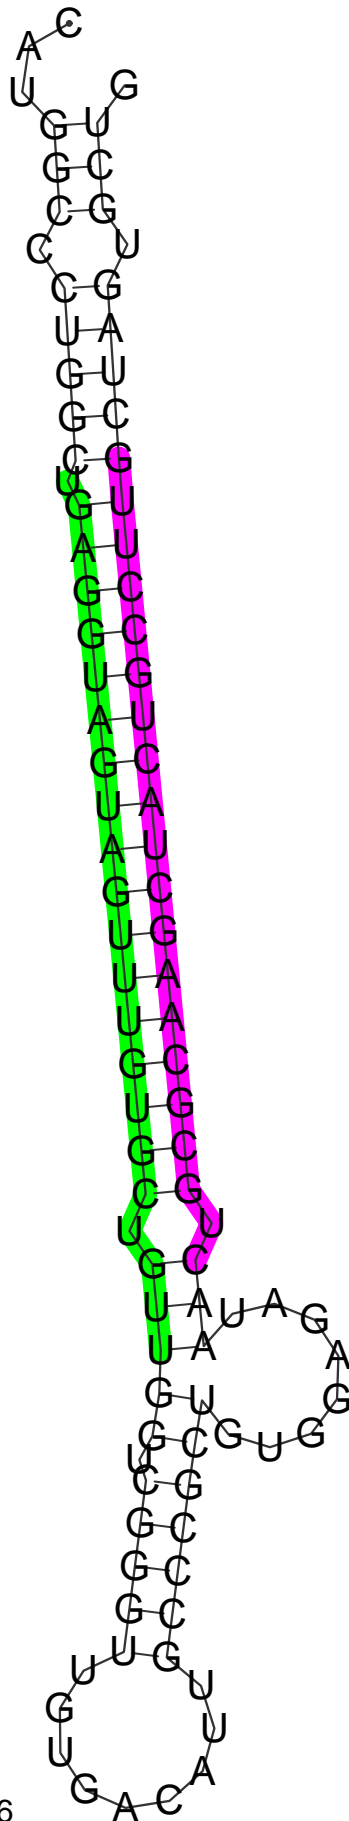

NW\_006384263.1\_164130-164226









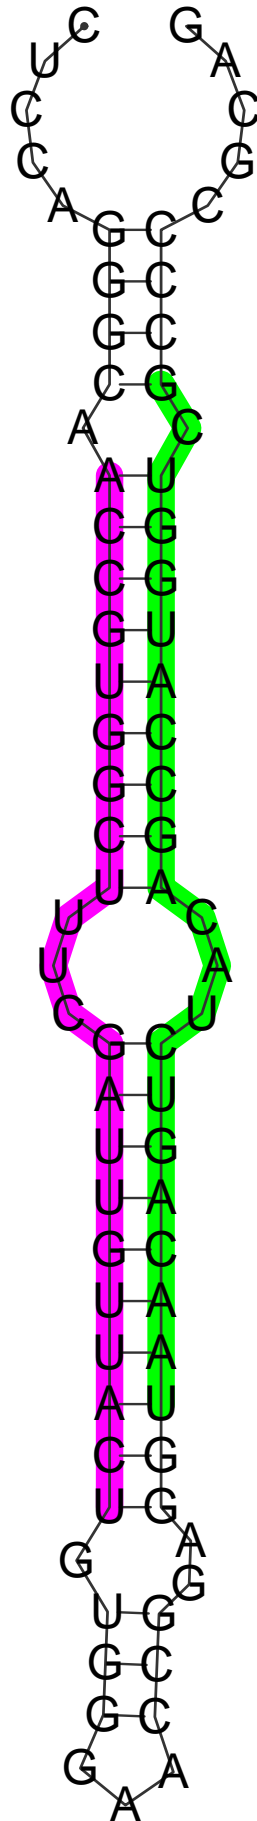

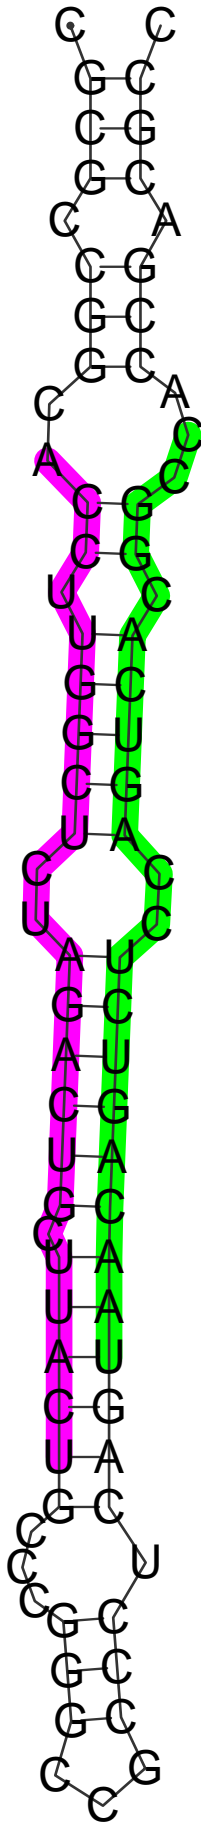





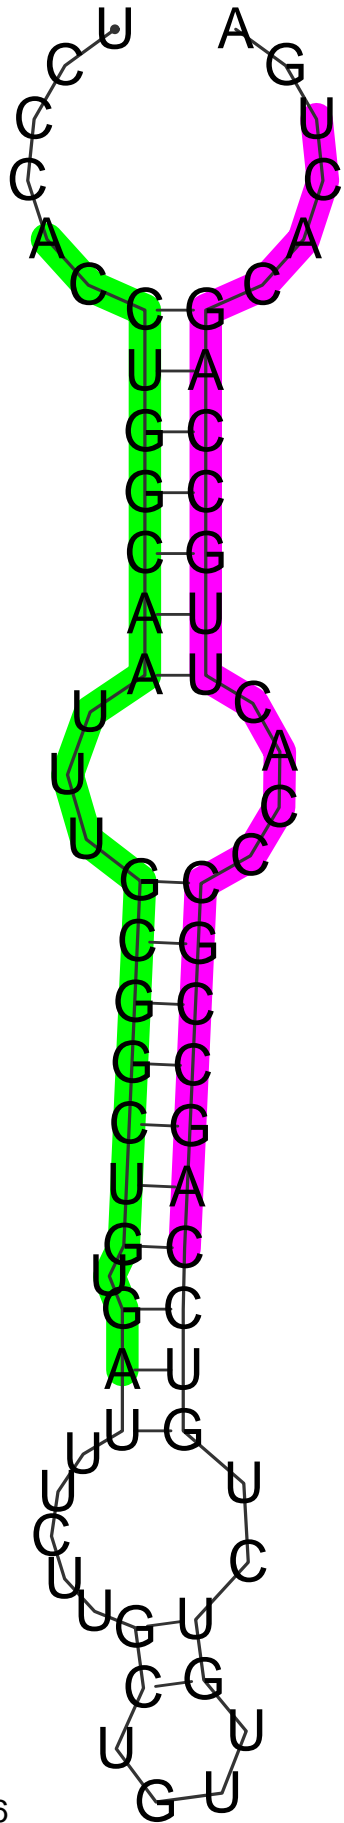

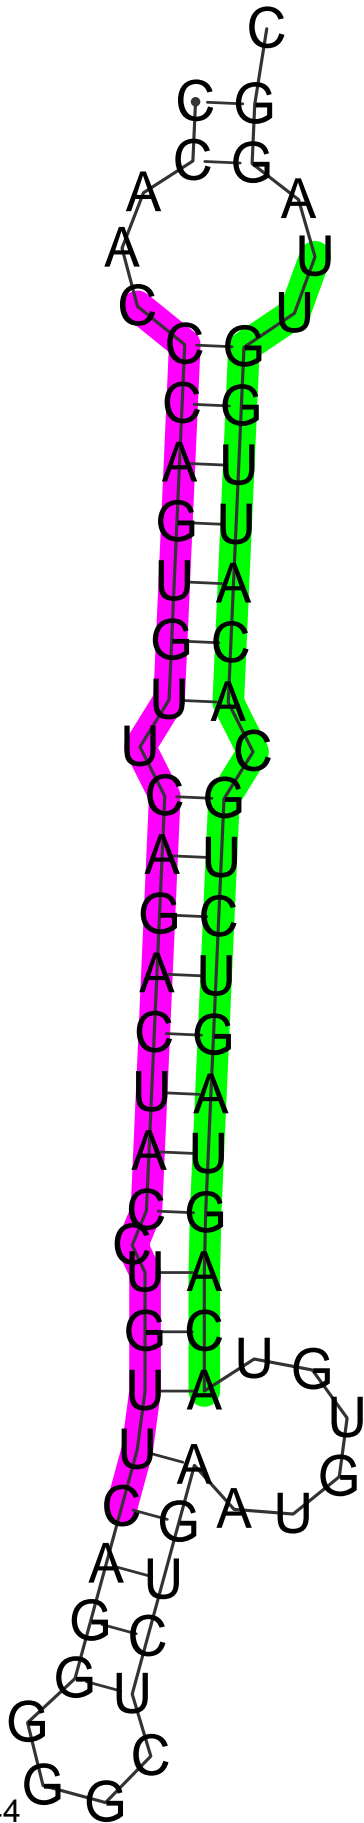

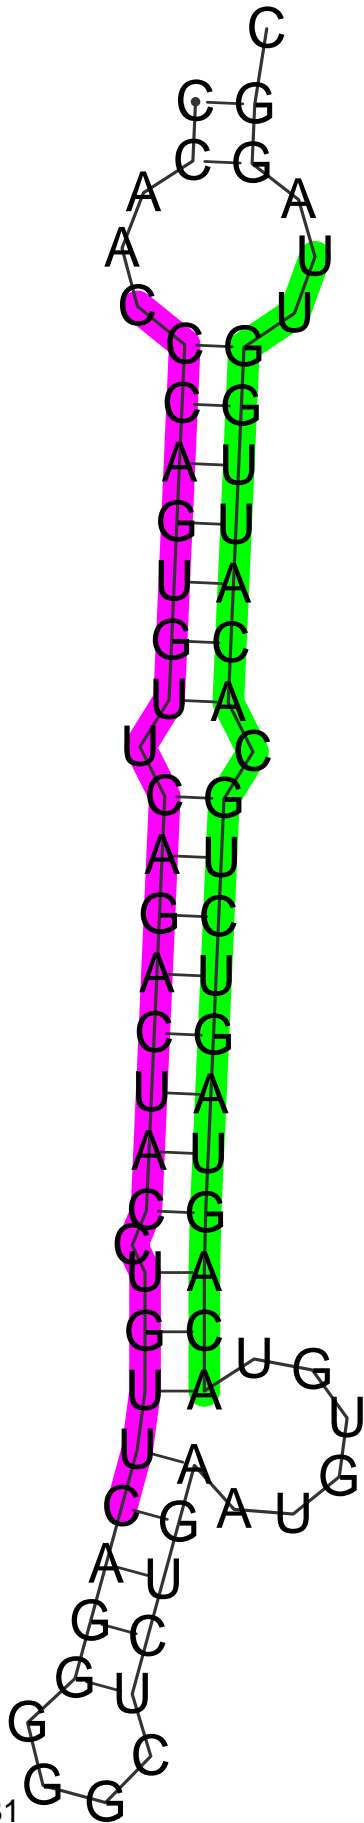

















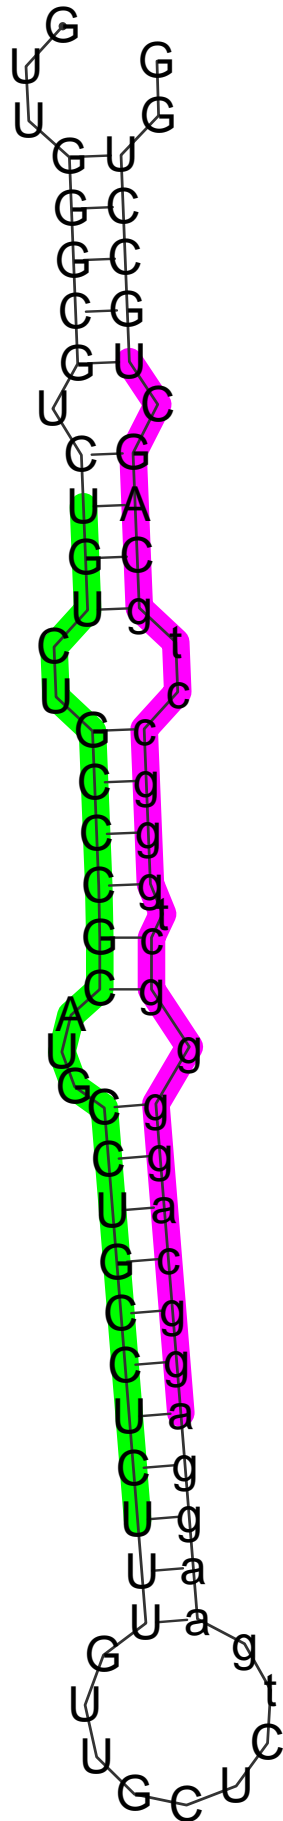







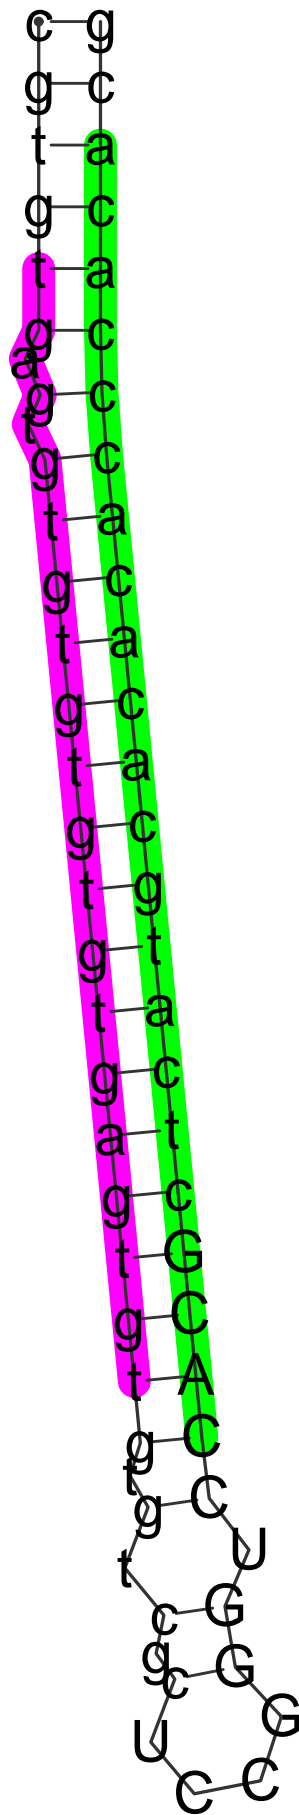

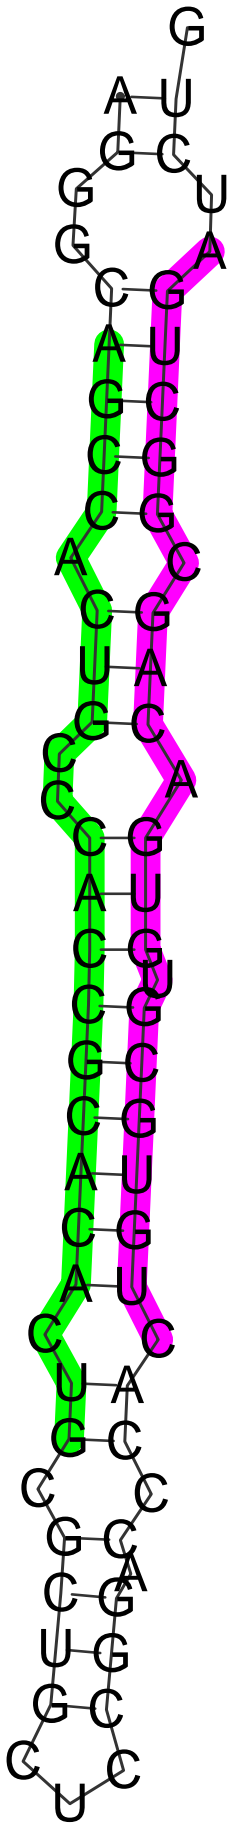









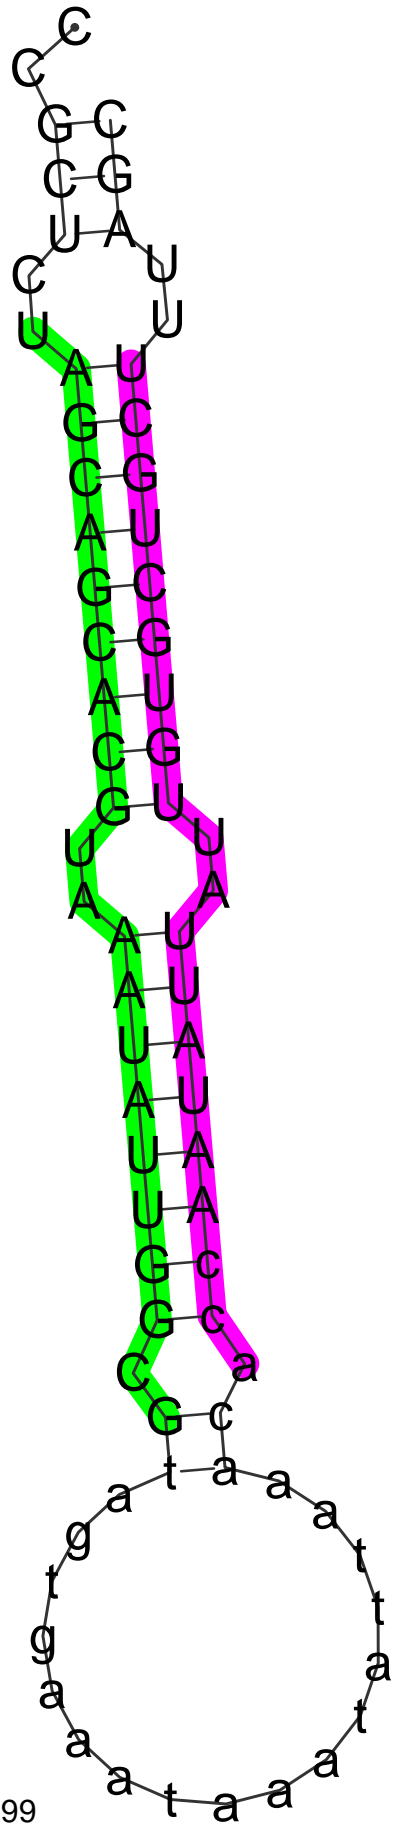





















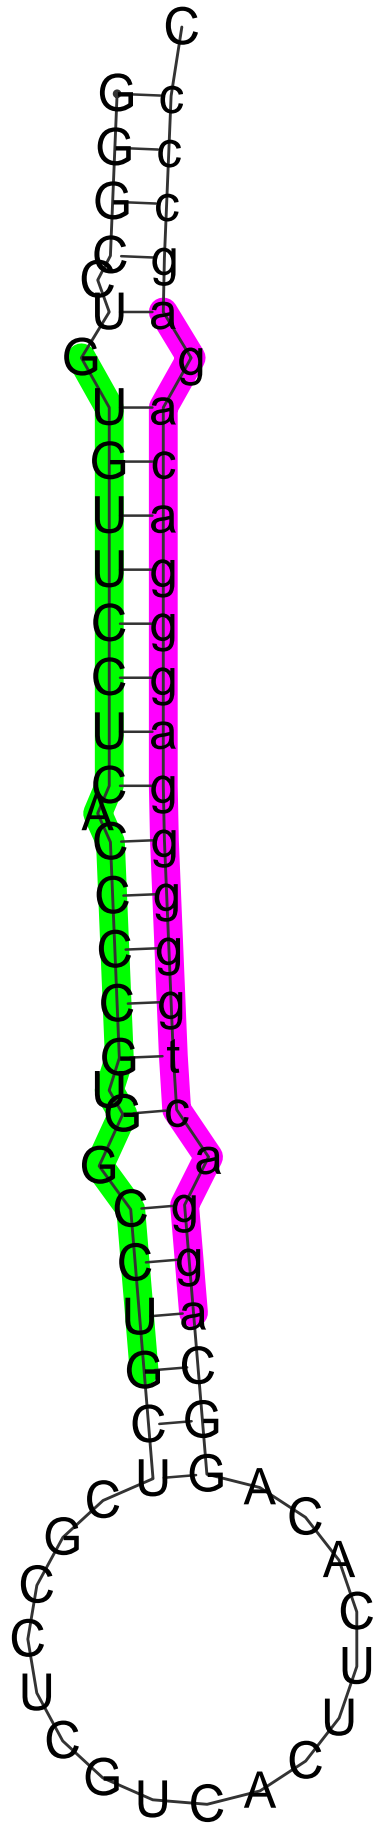













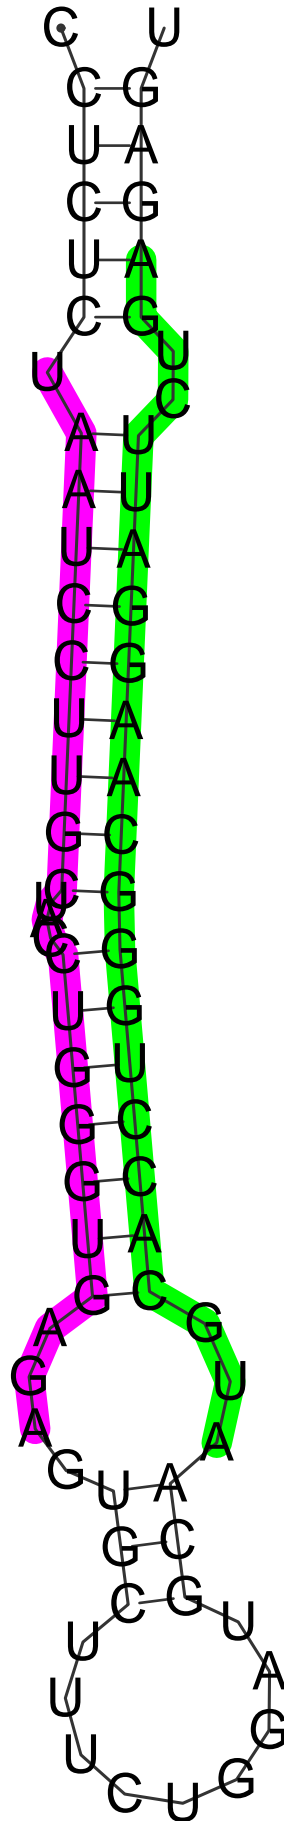









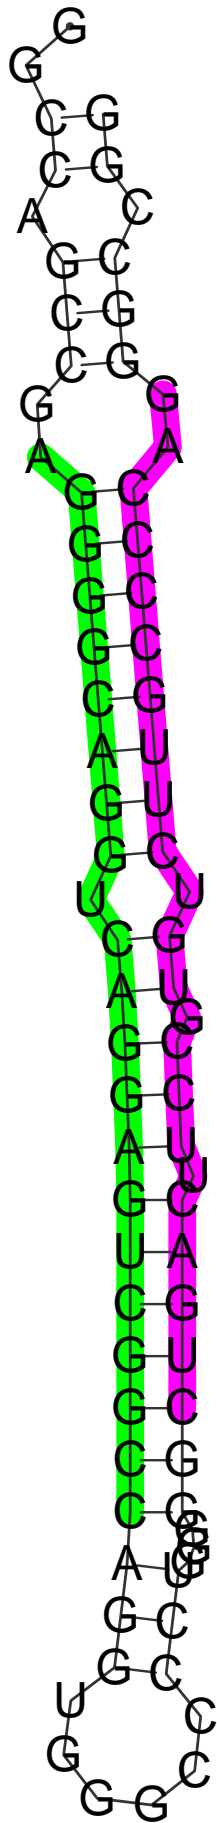



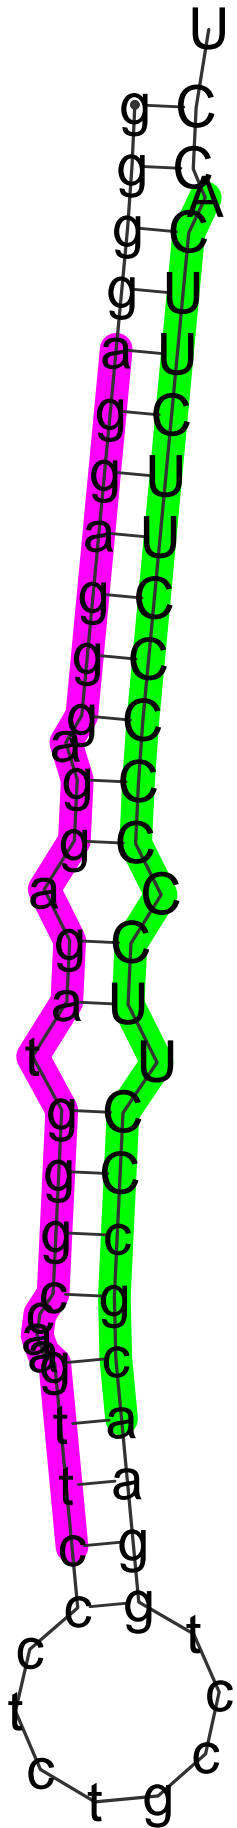



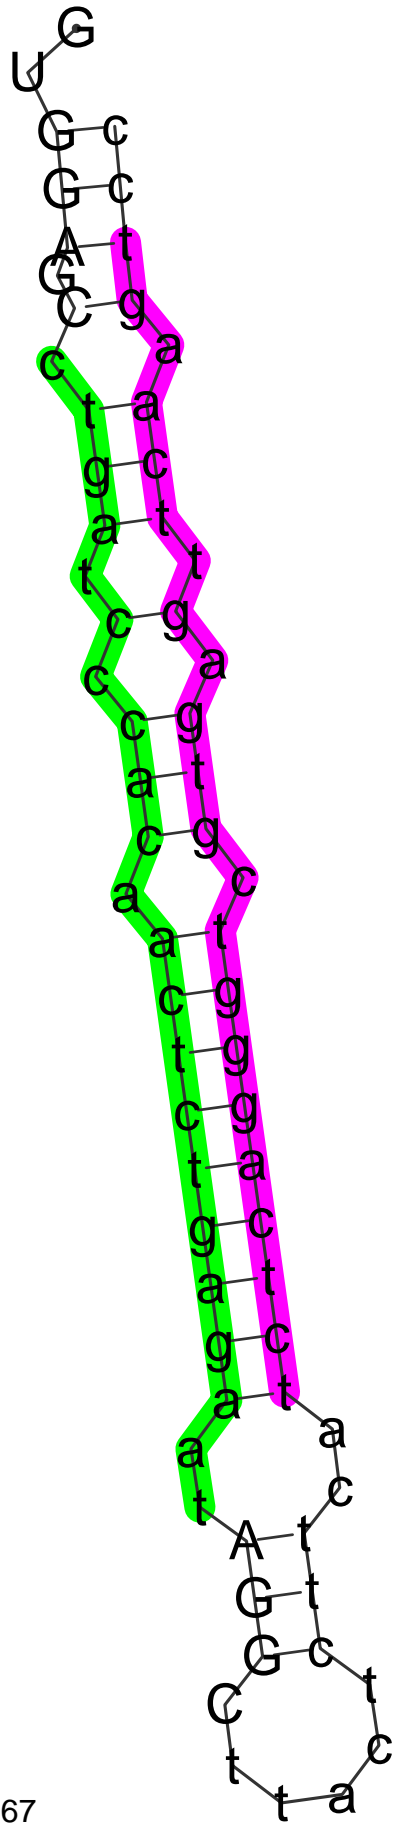









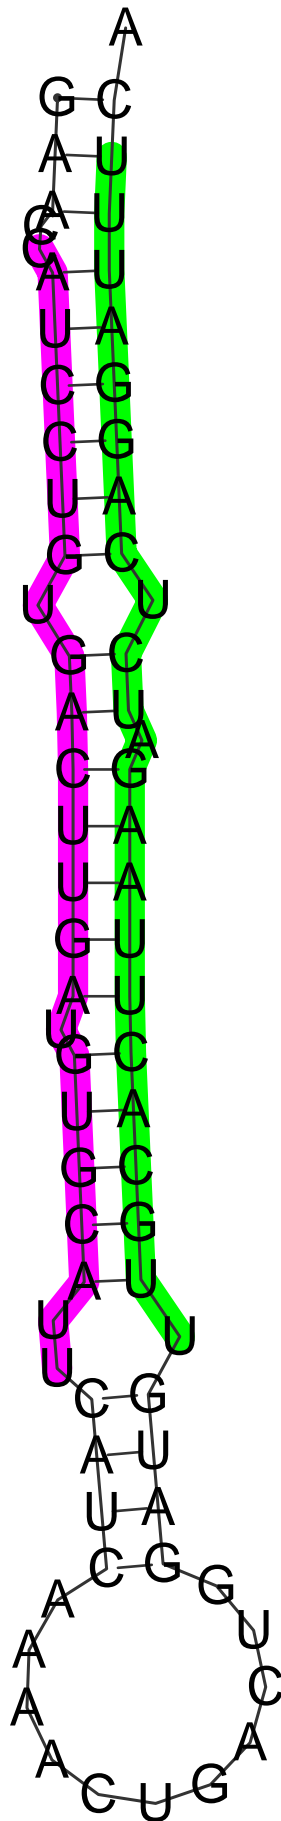

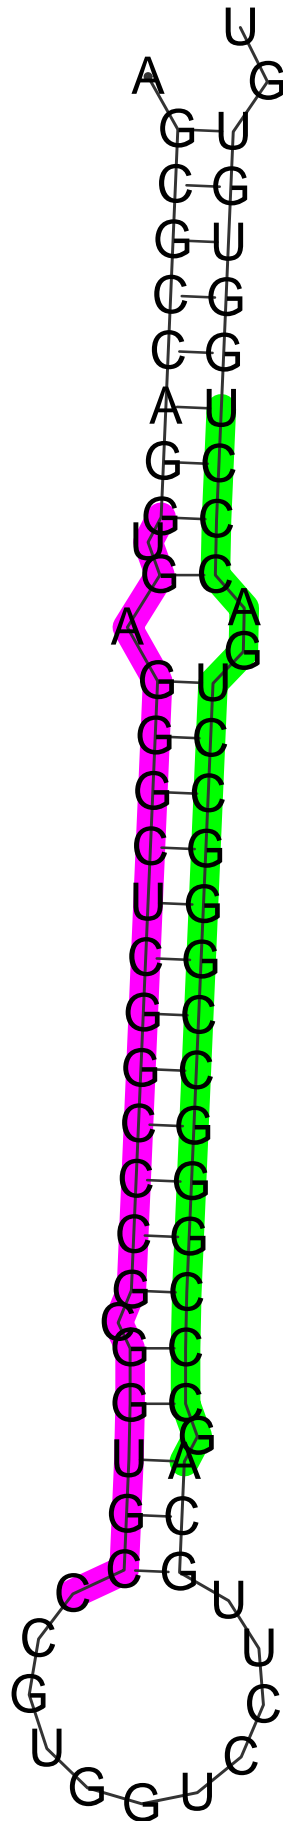

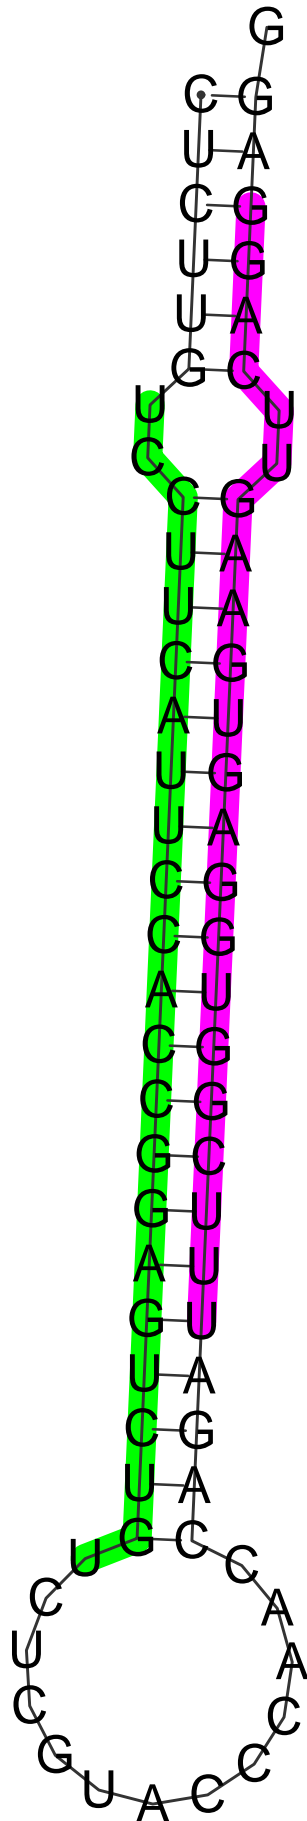

NW\_006384878.1\_481156-481225

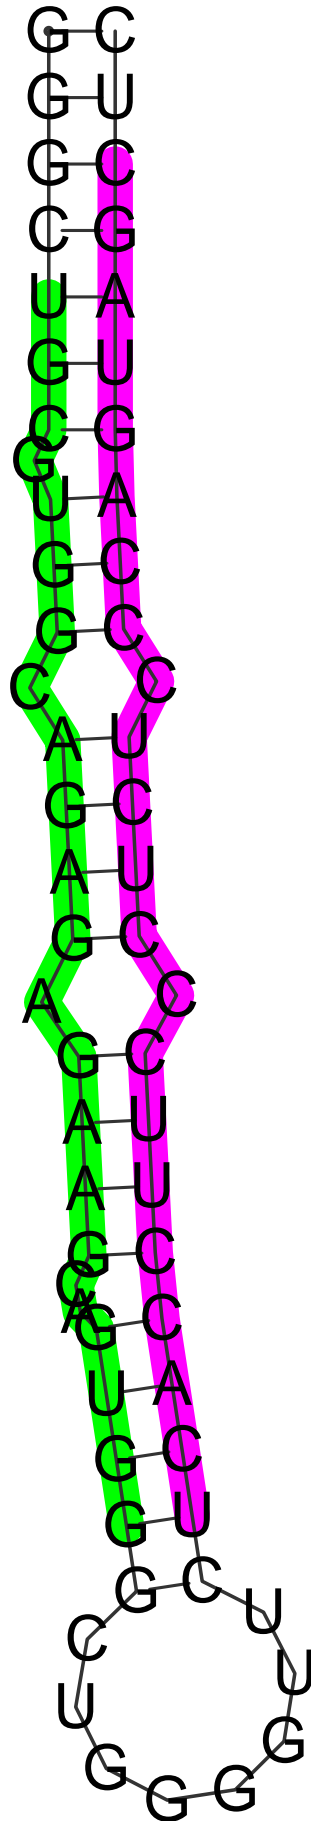

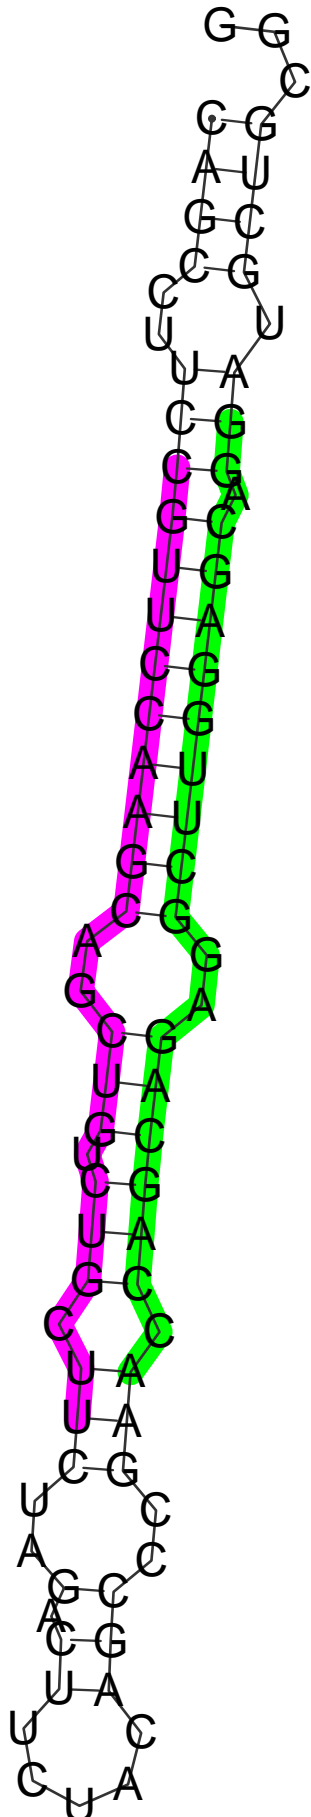



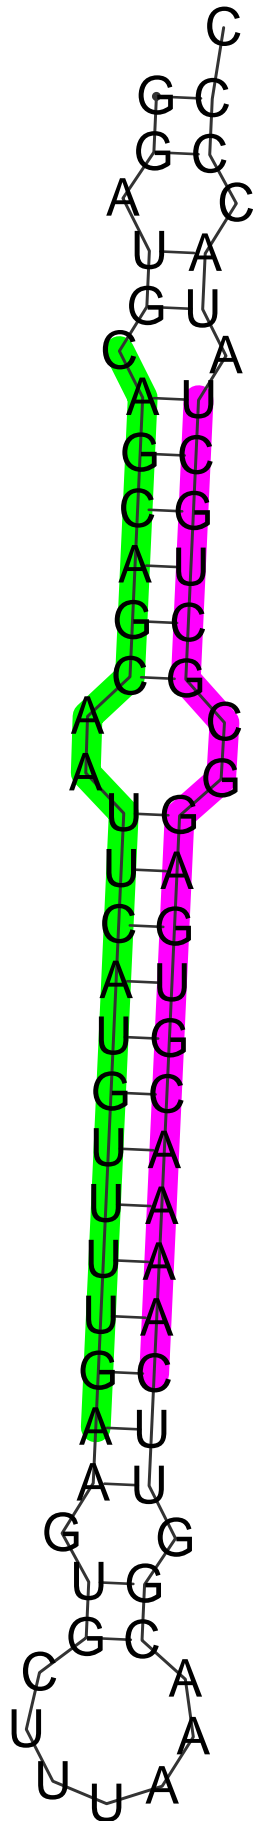













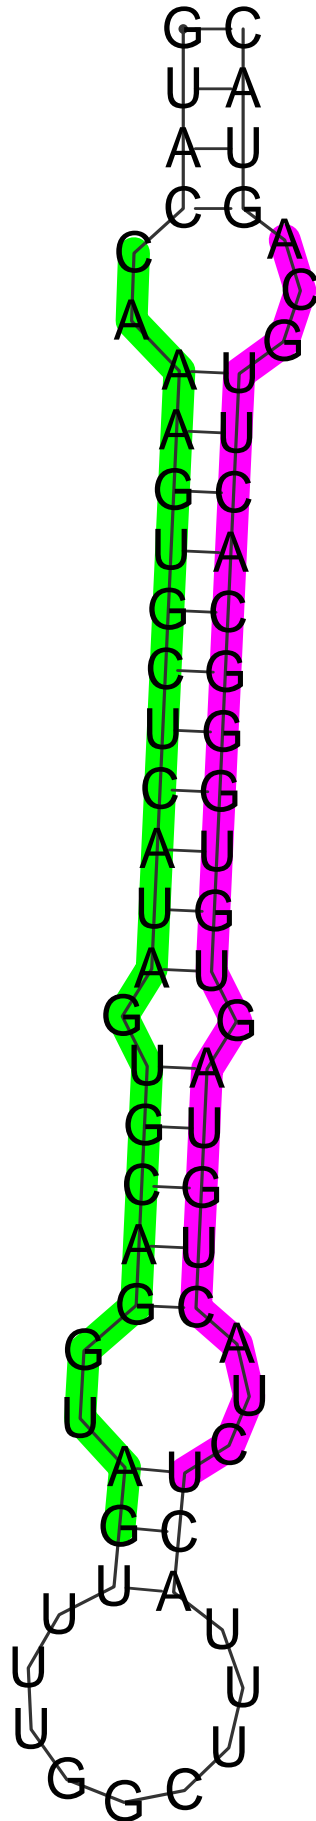







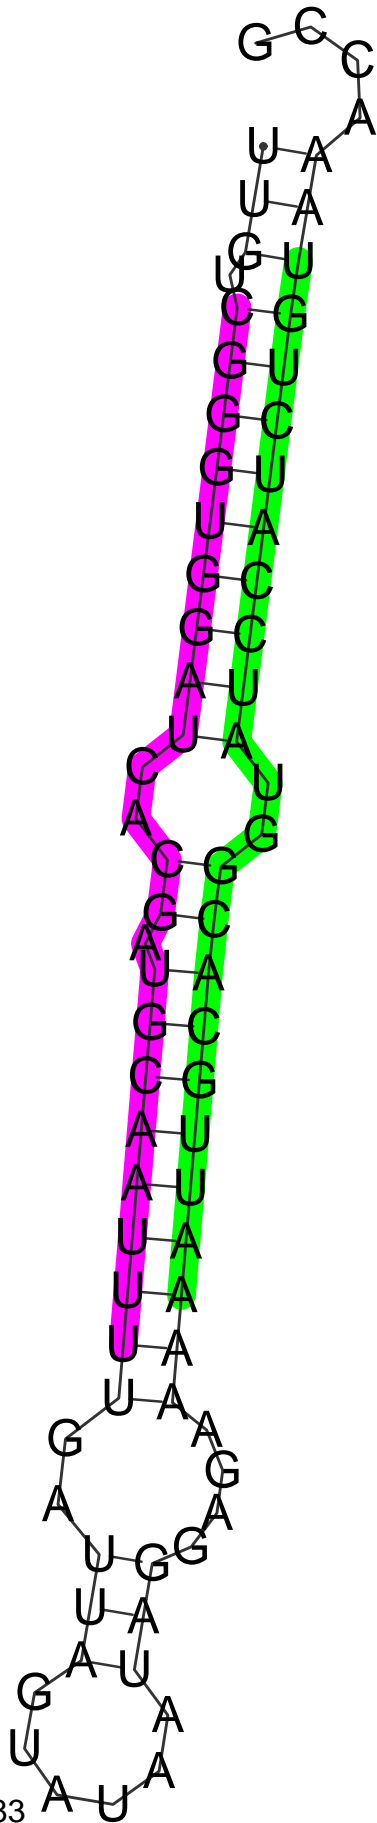



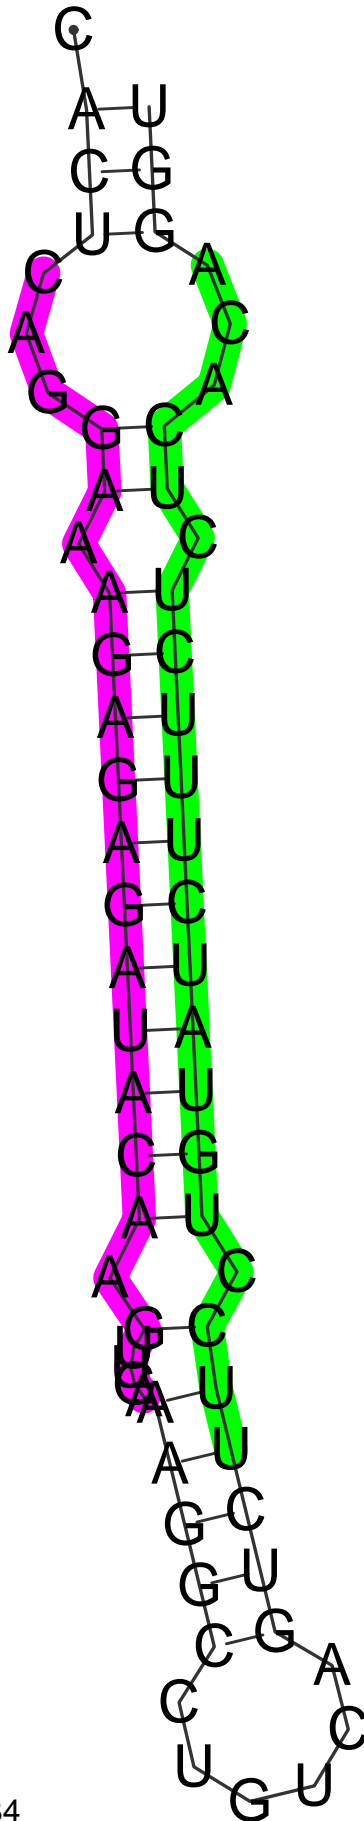

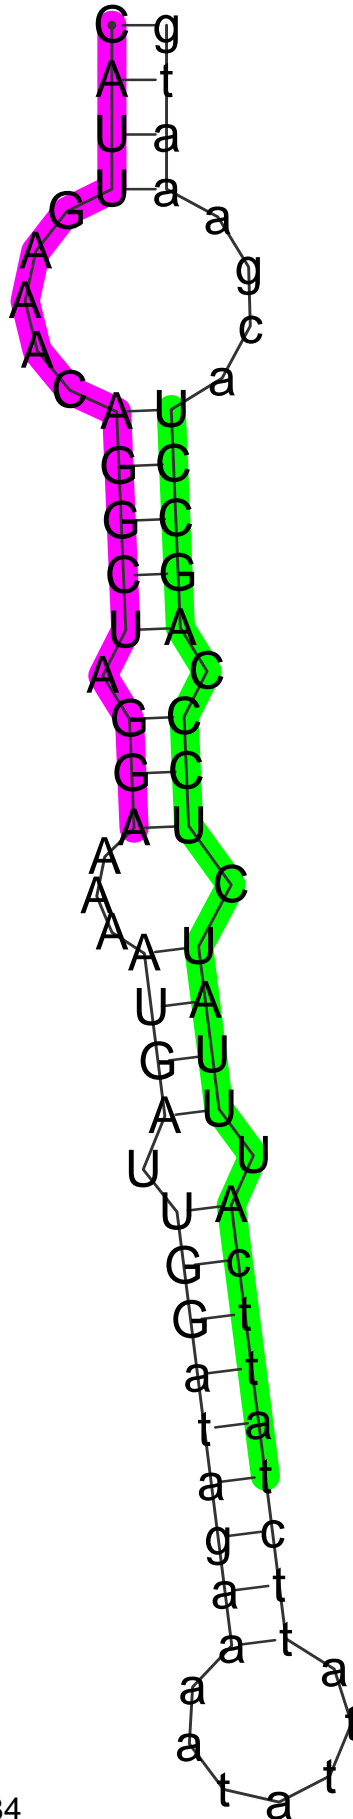

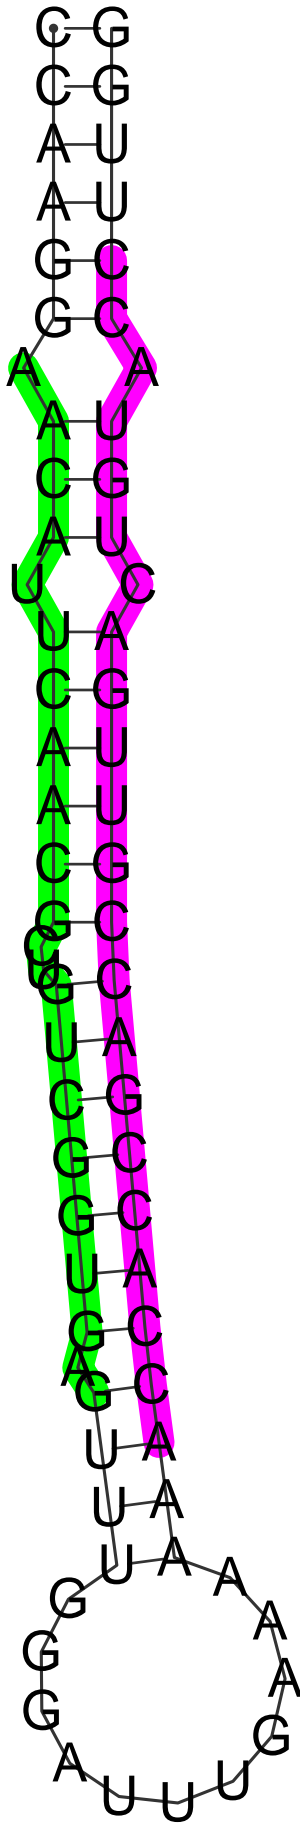

NW\_006384957.1\_375517-375586

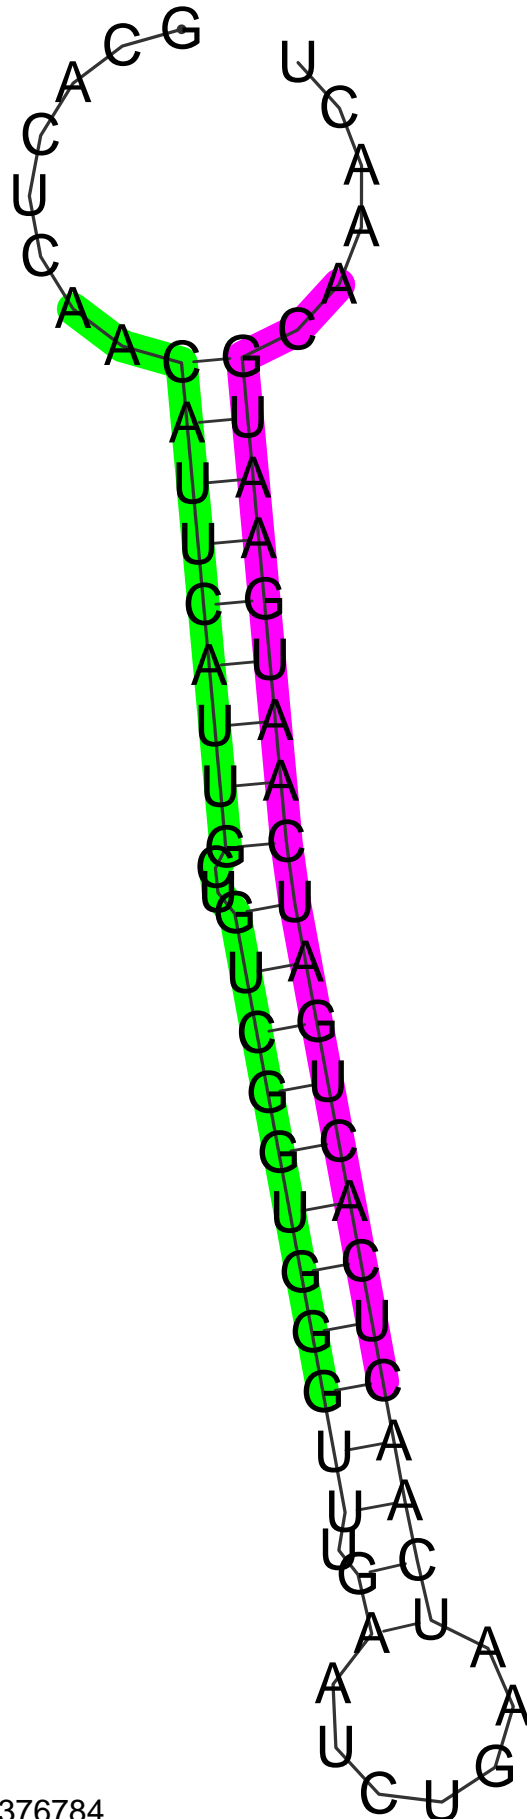



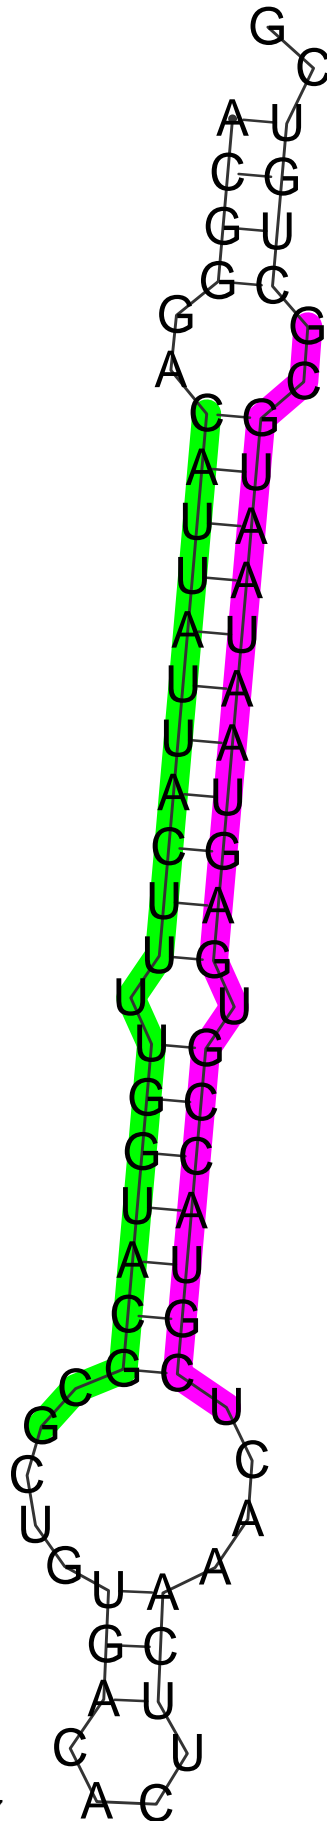

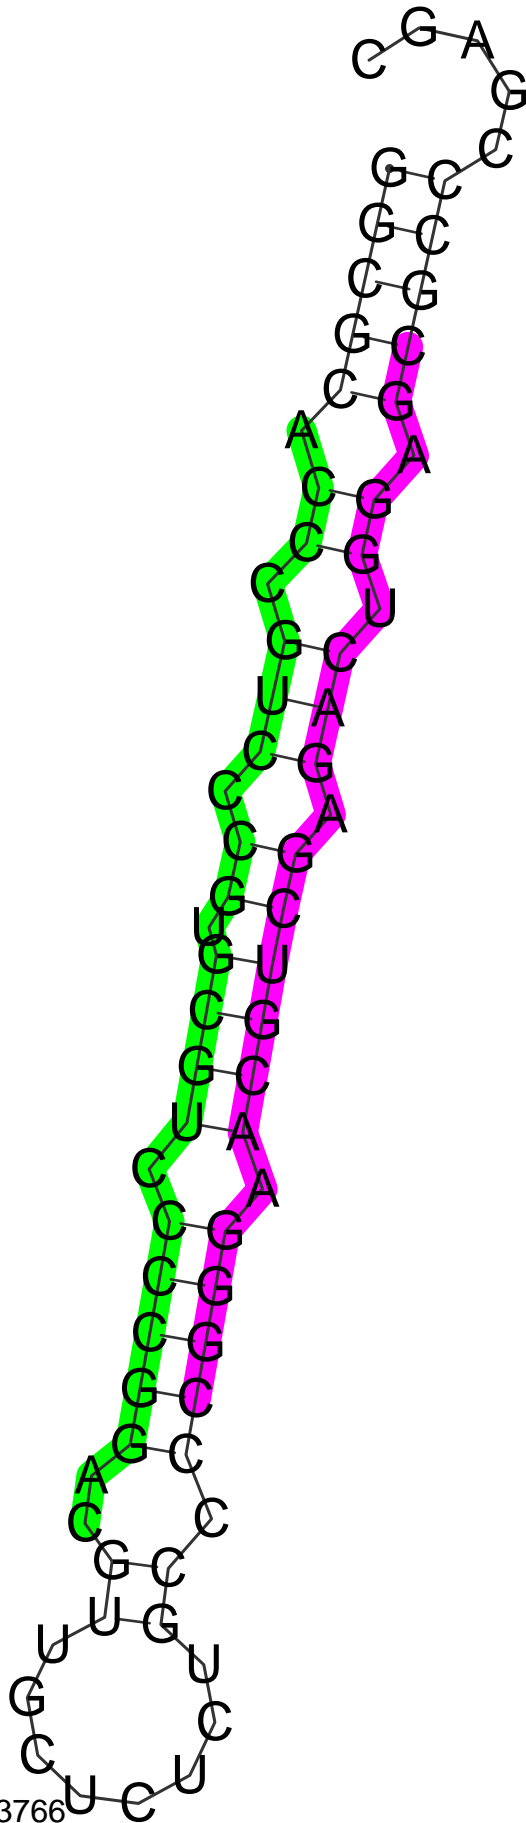



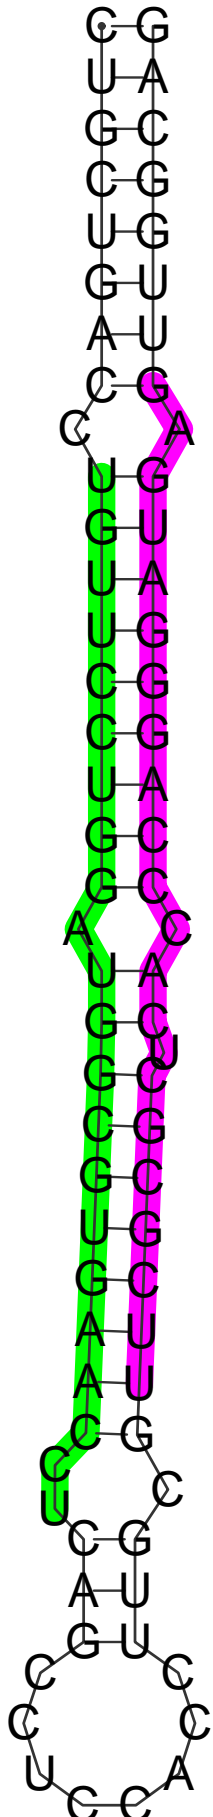

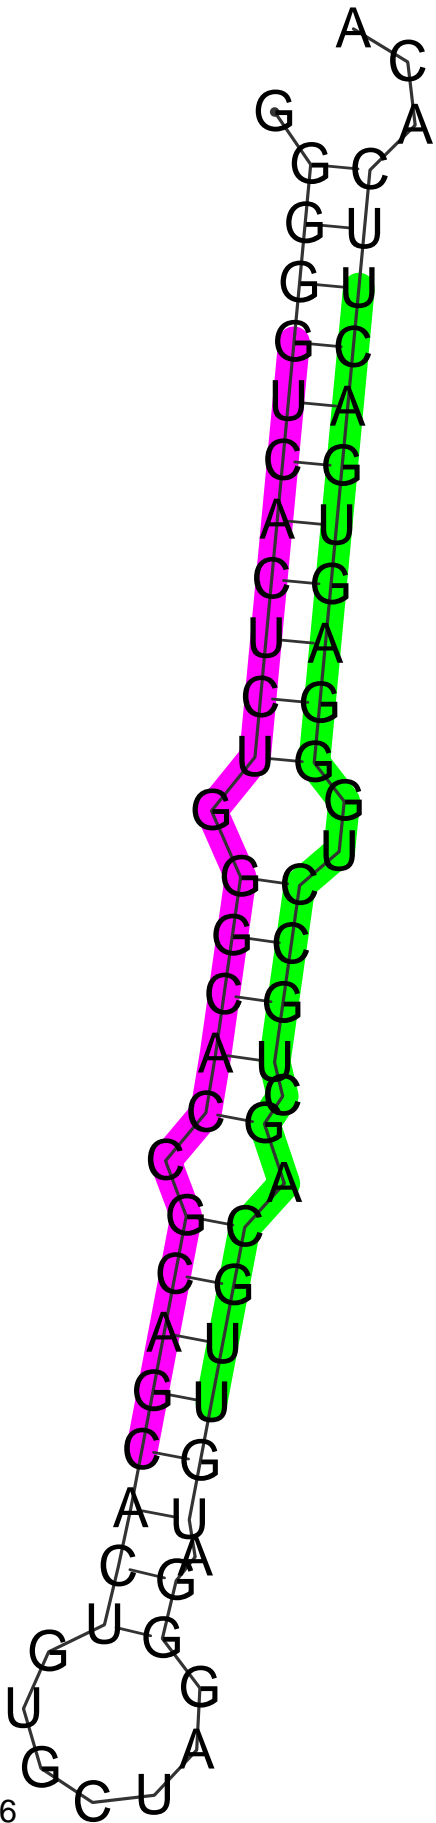

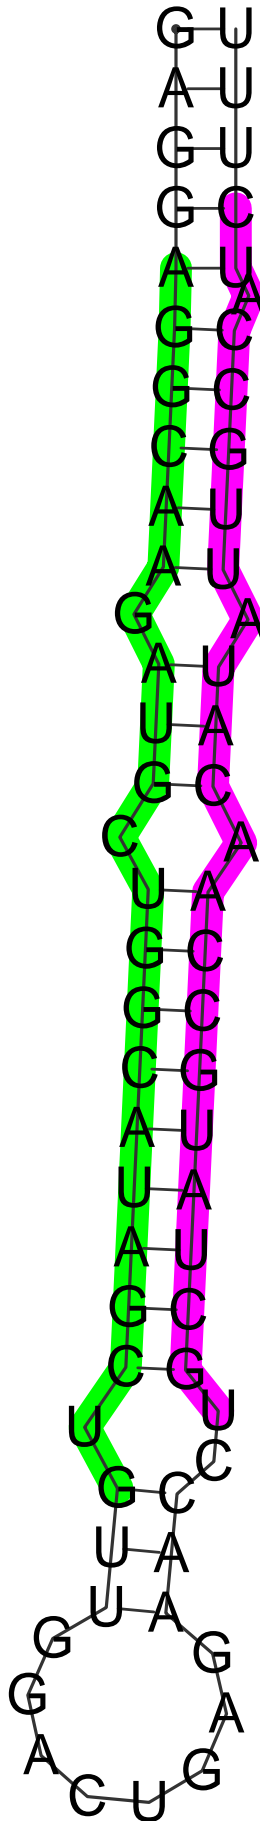

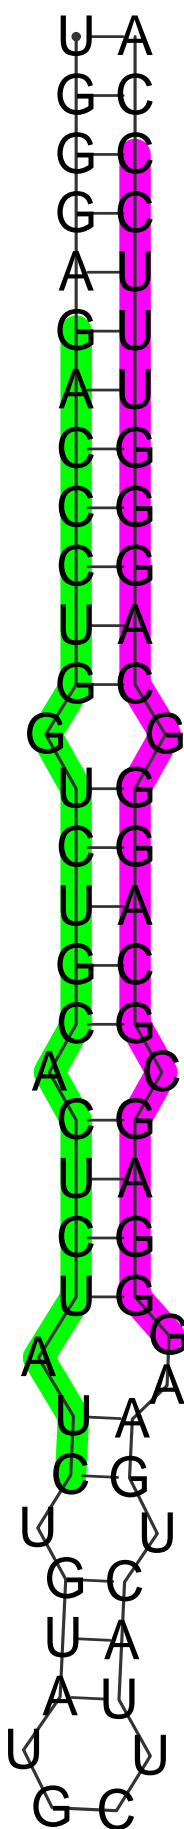

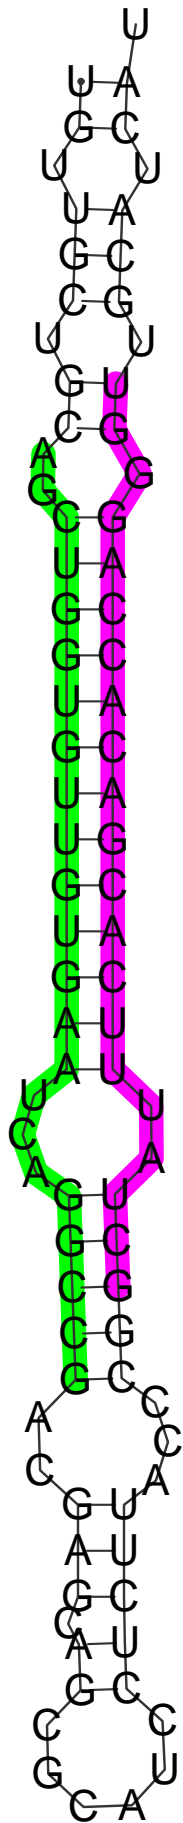



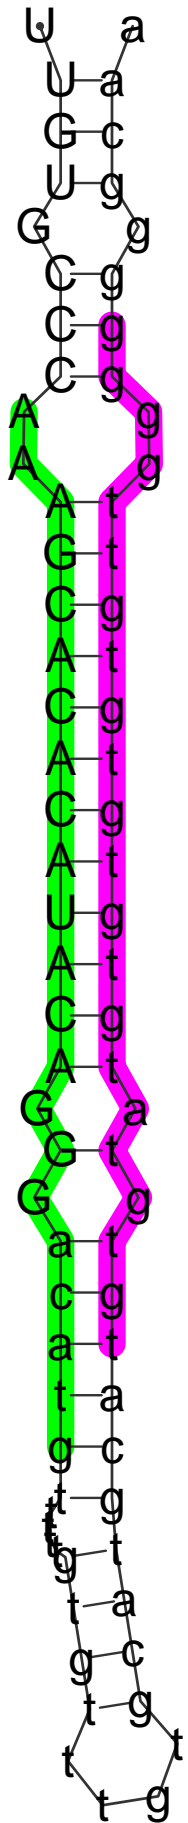

NW\_006385100.1\_325141-325218

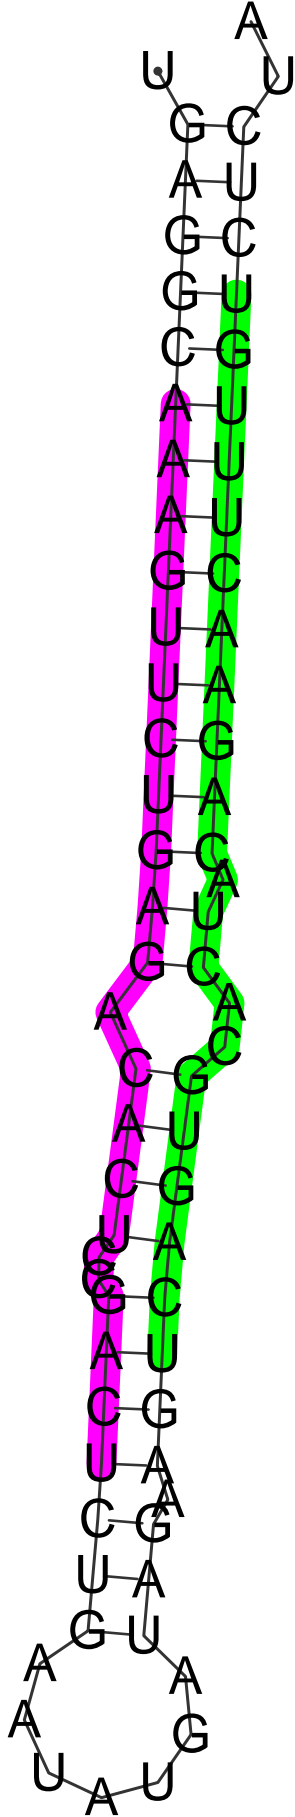

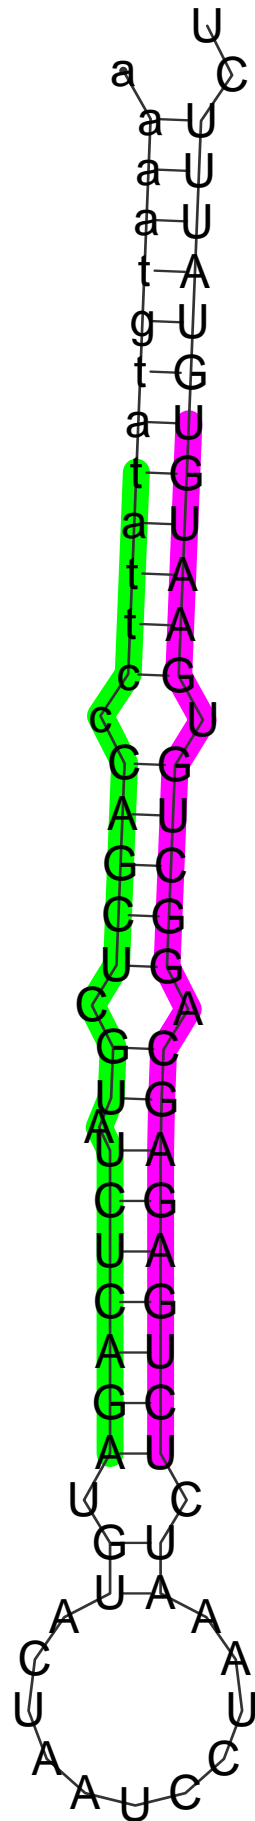

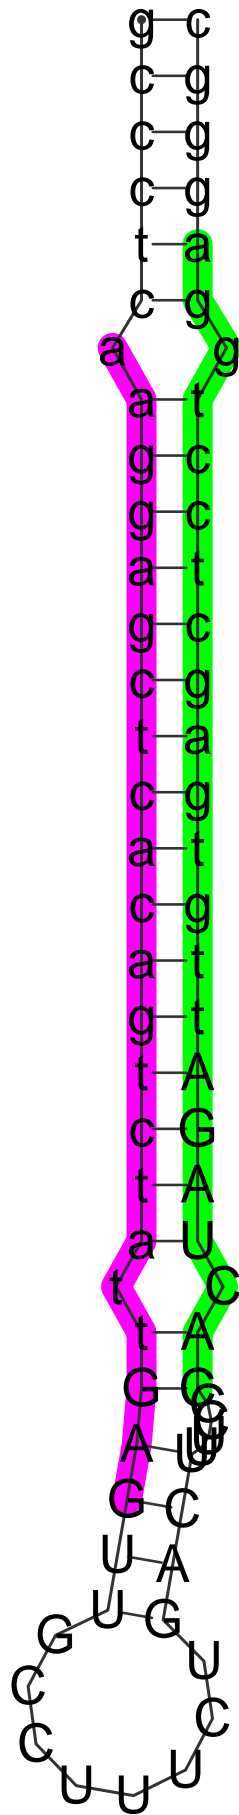

NW\_006385178.1\_312557-312628

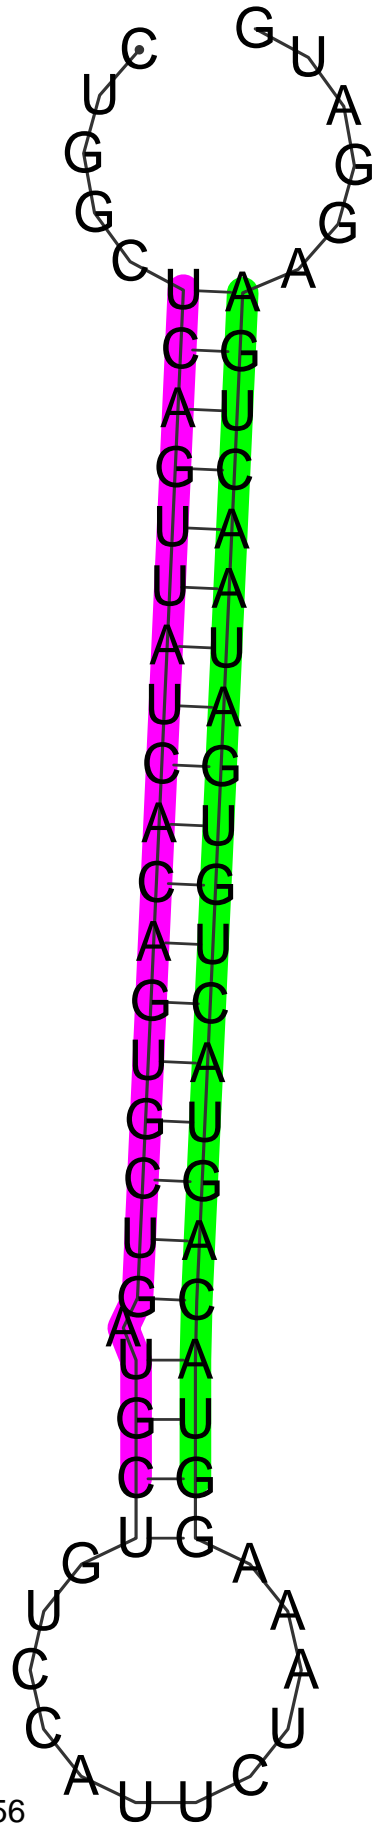

NW\_006385197.1\_293489-293556











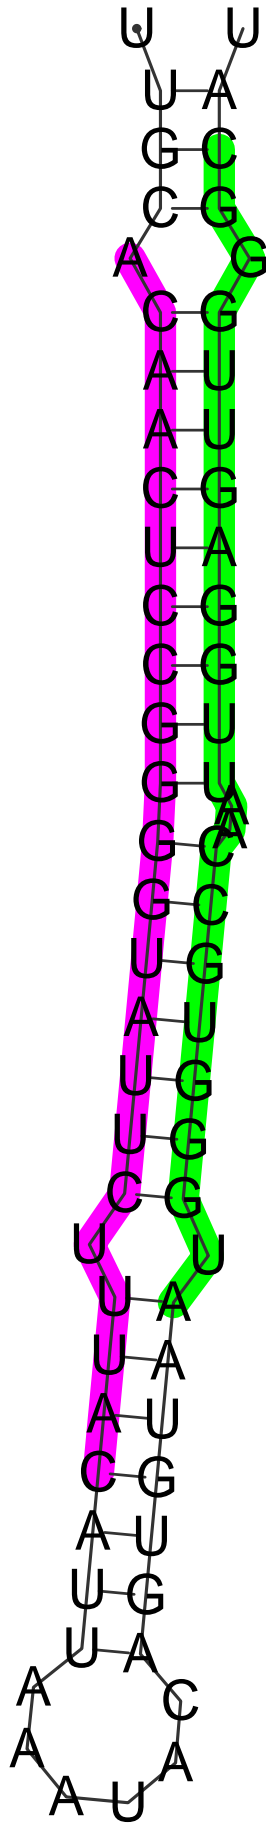

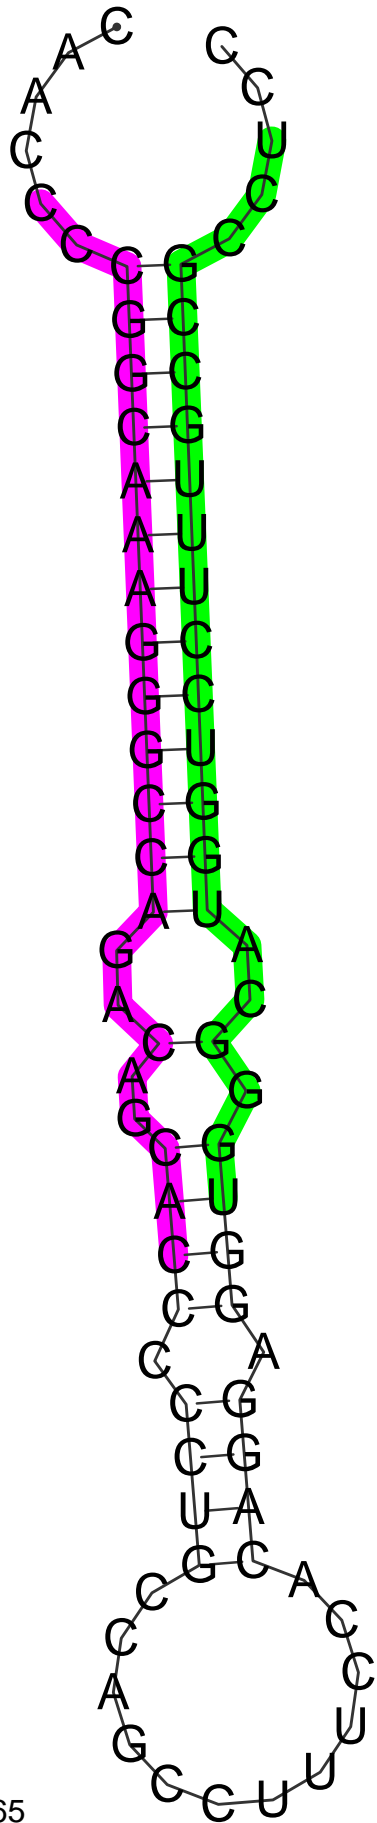

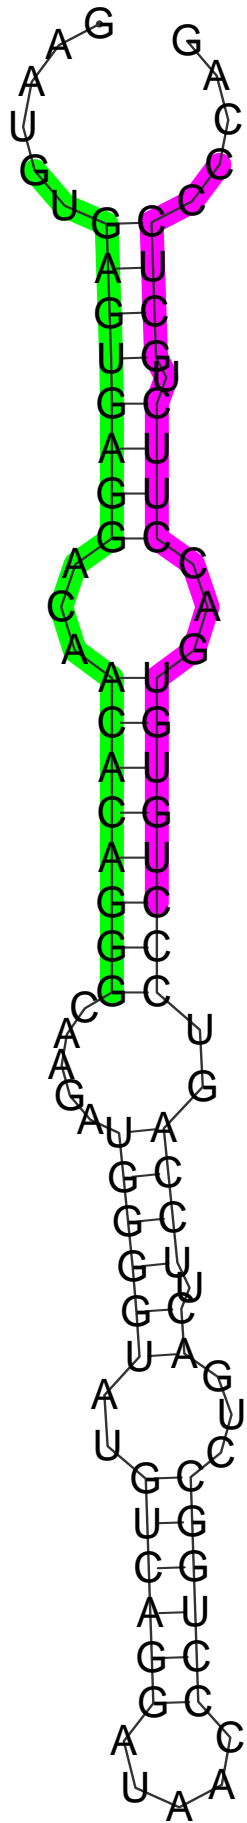

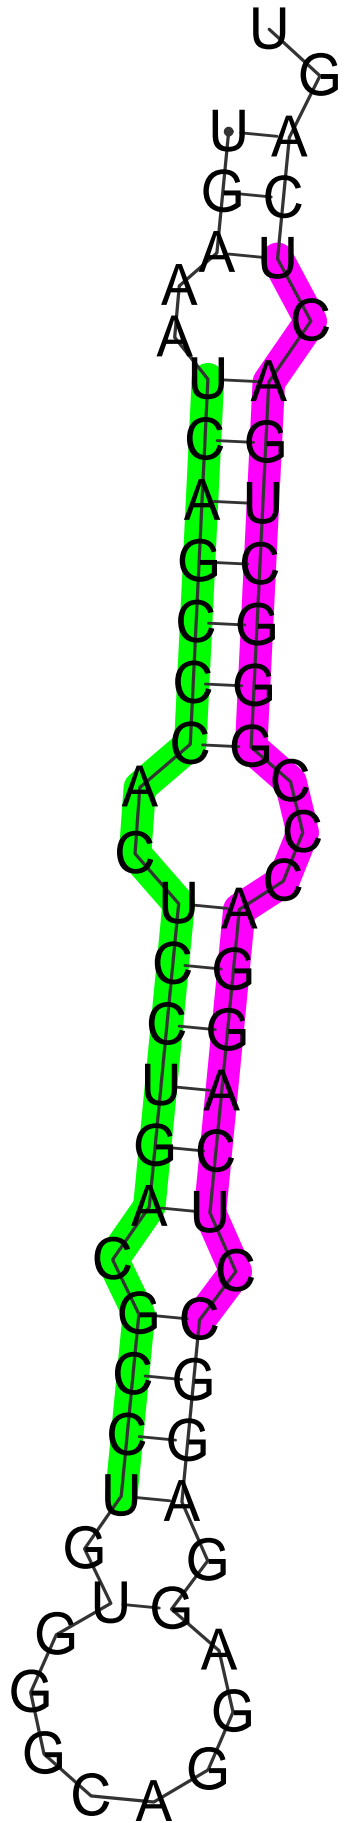

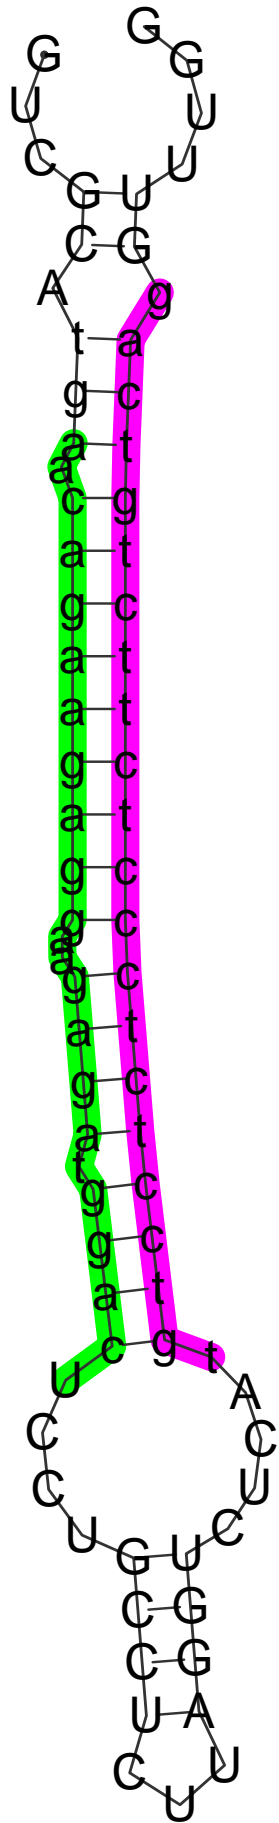

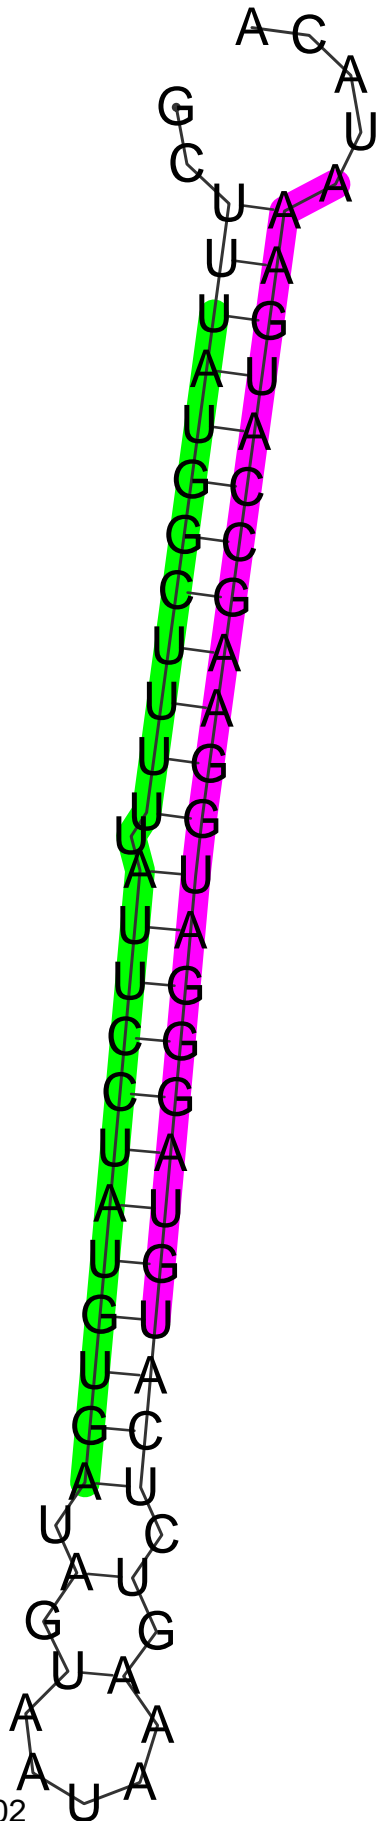

NW\_006385438.1\_273034-273102

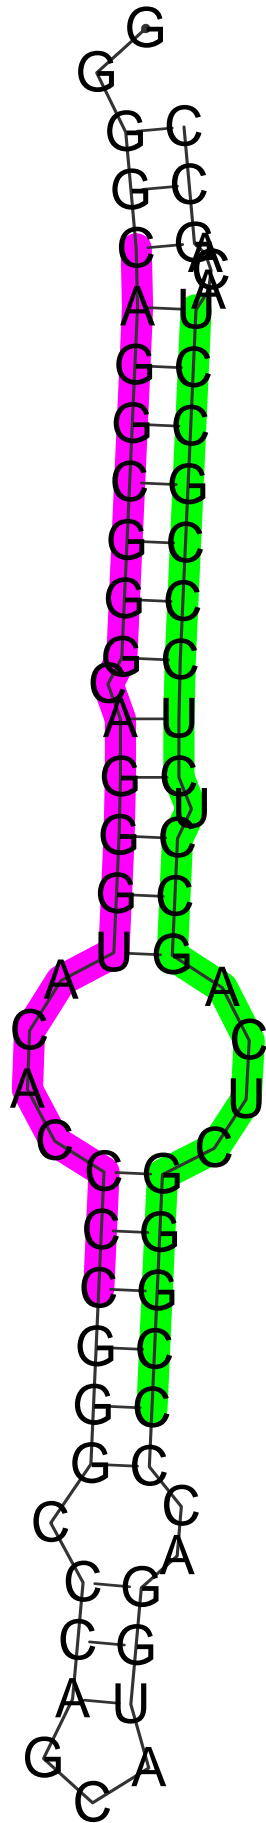



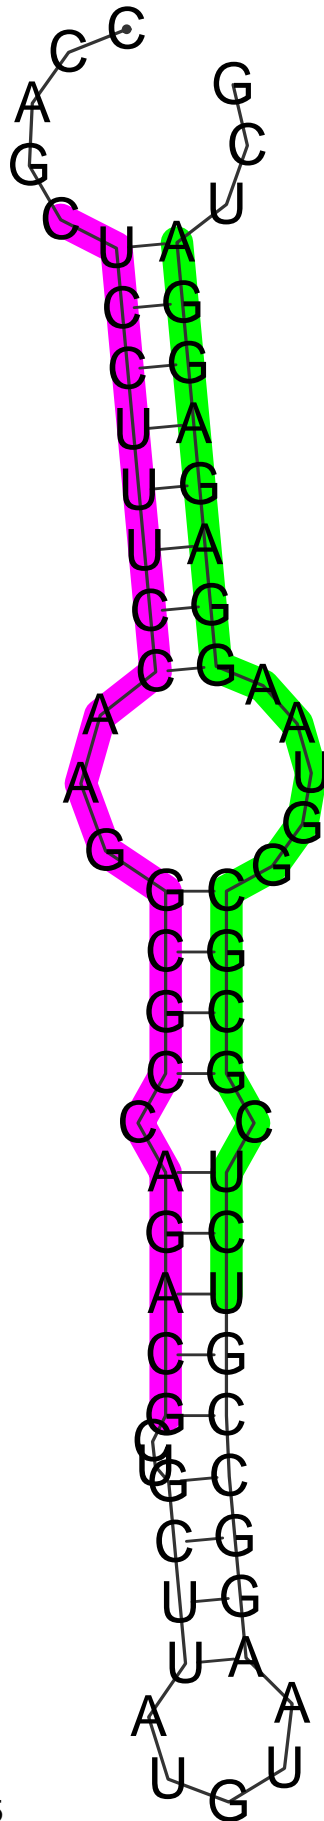

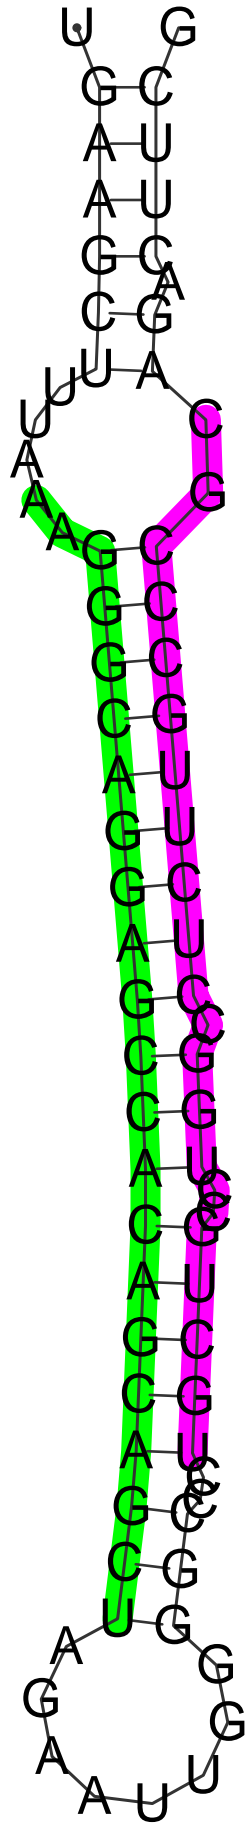



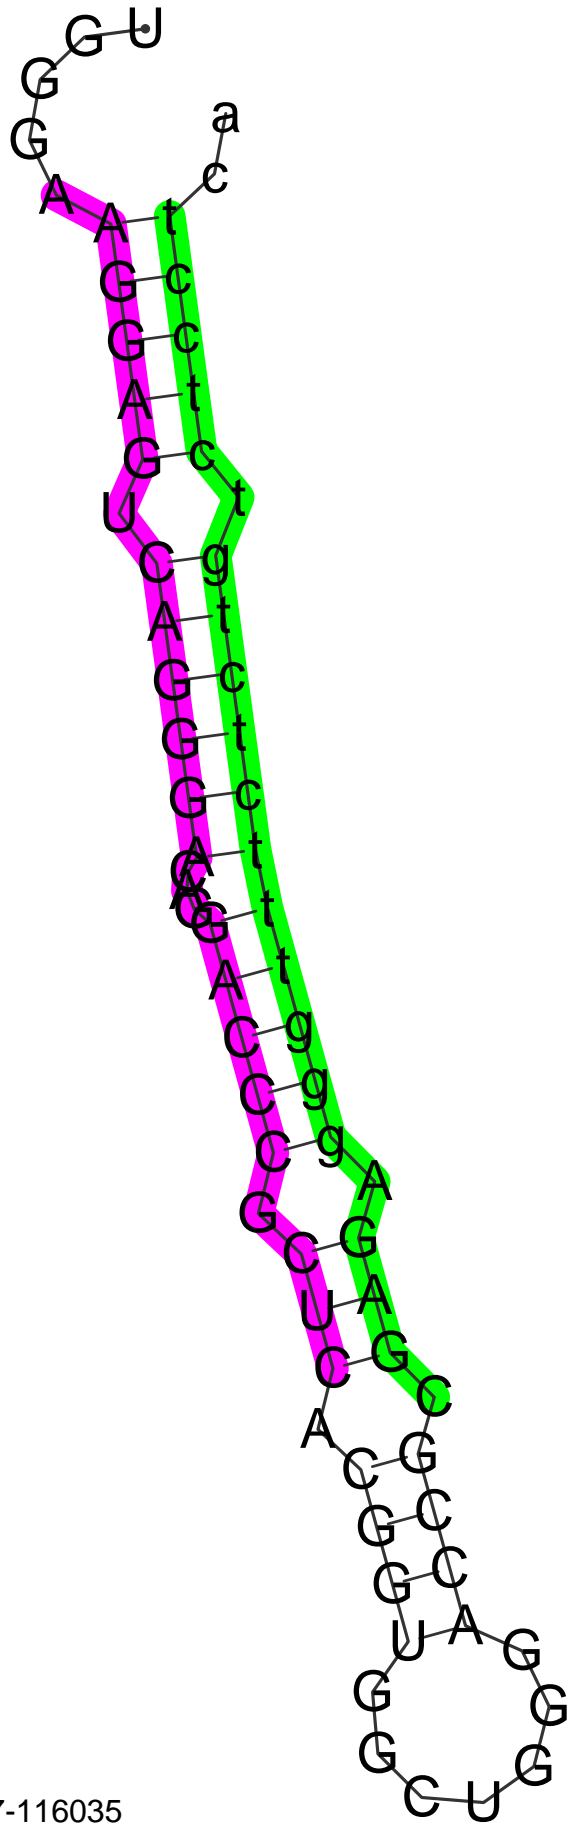



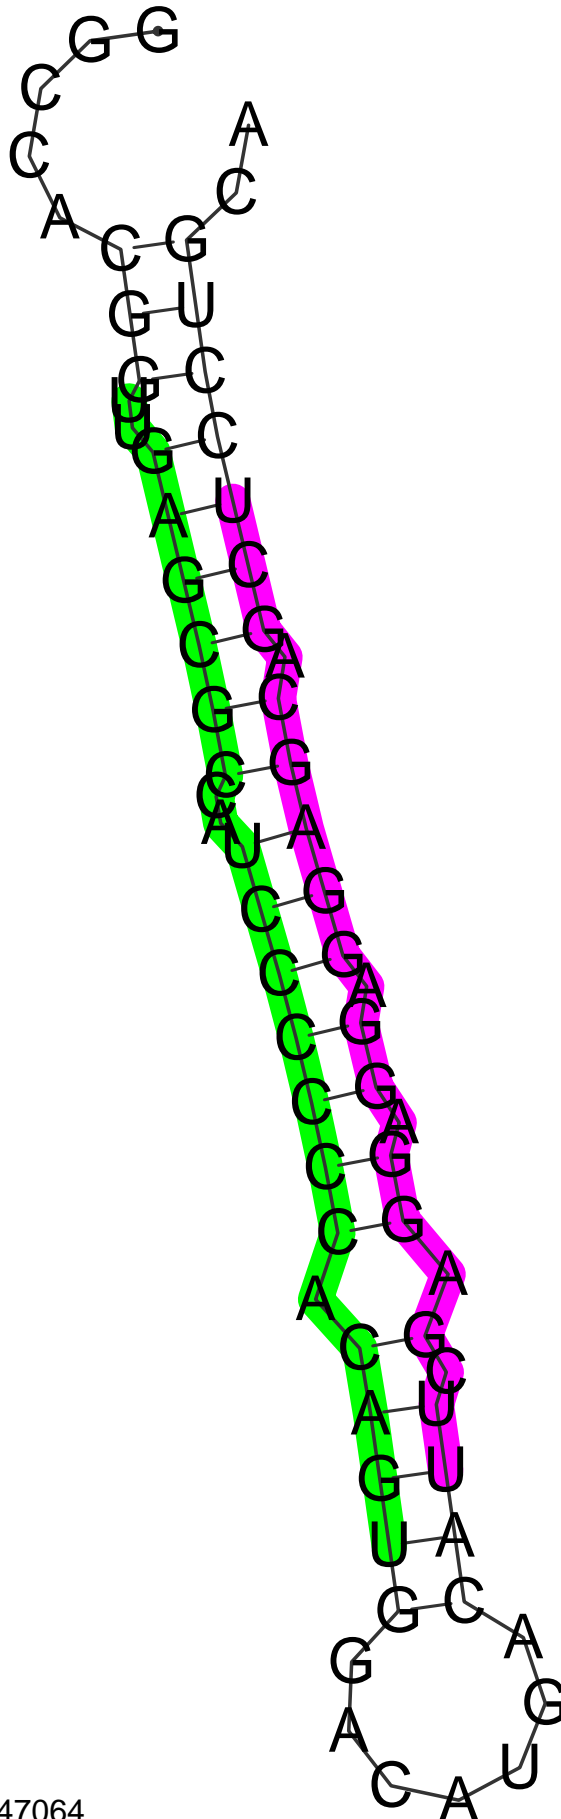

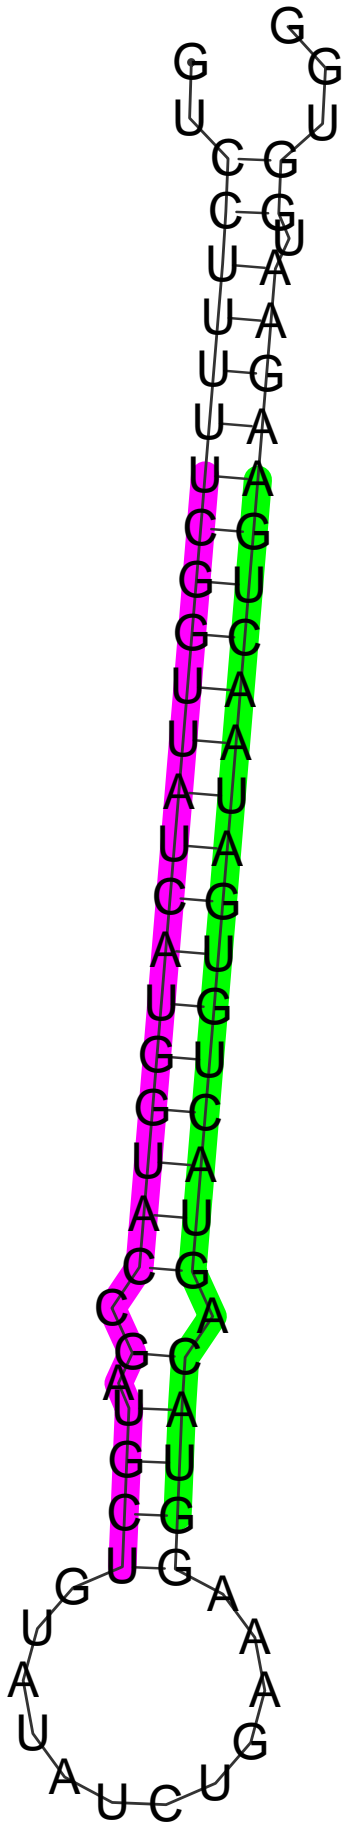

NW\_006385576.1\_15772-15846

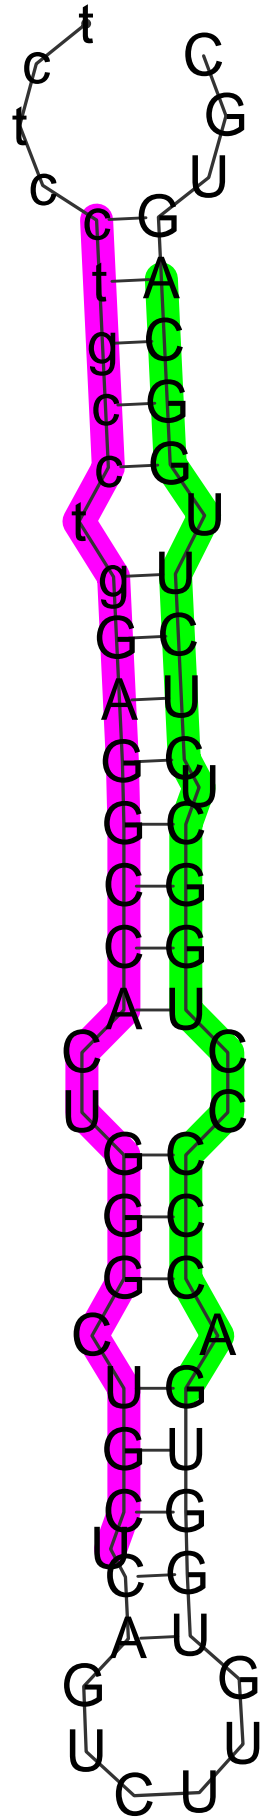







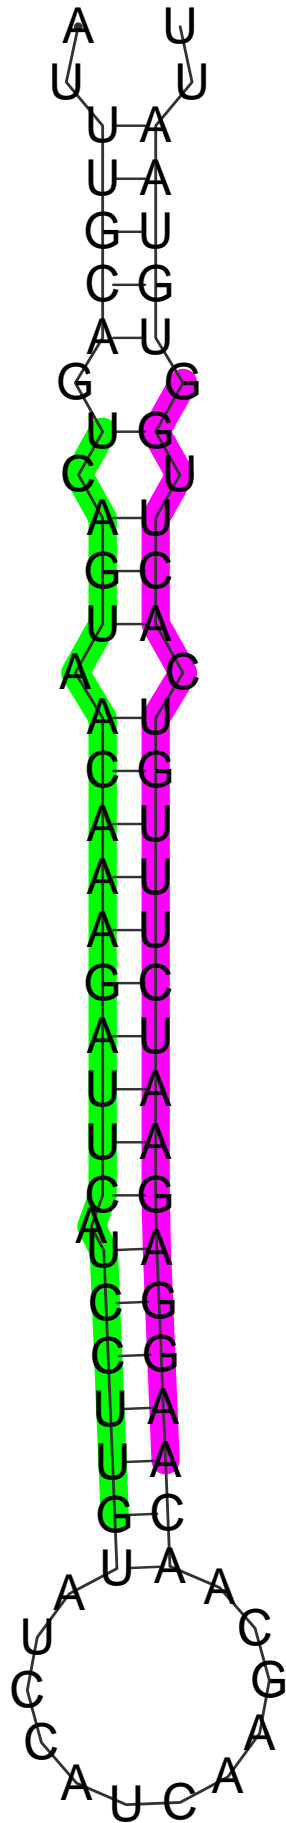

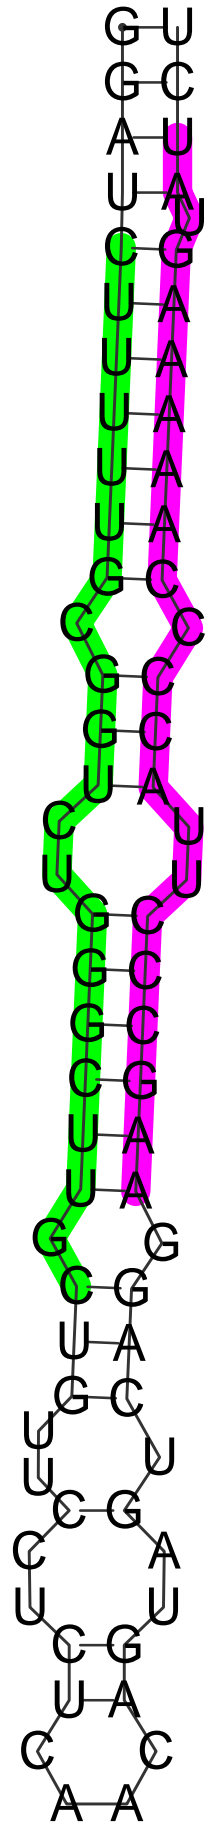

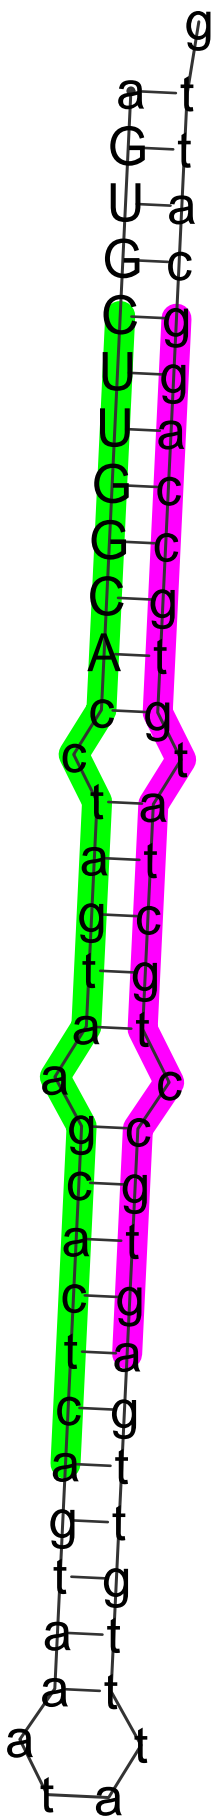

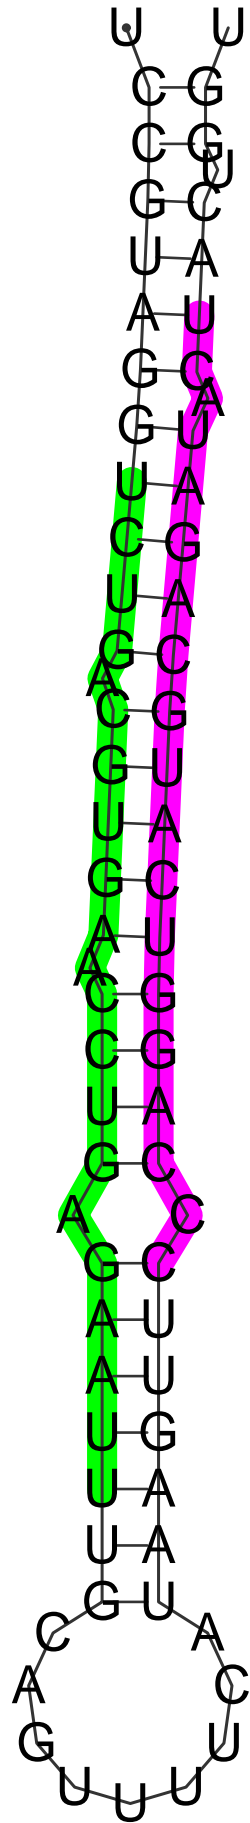

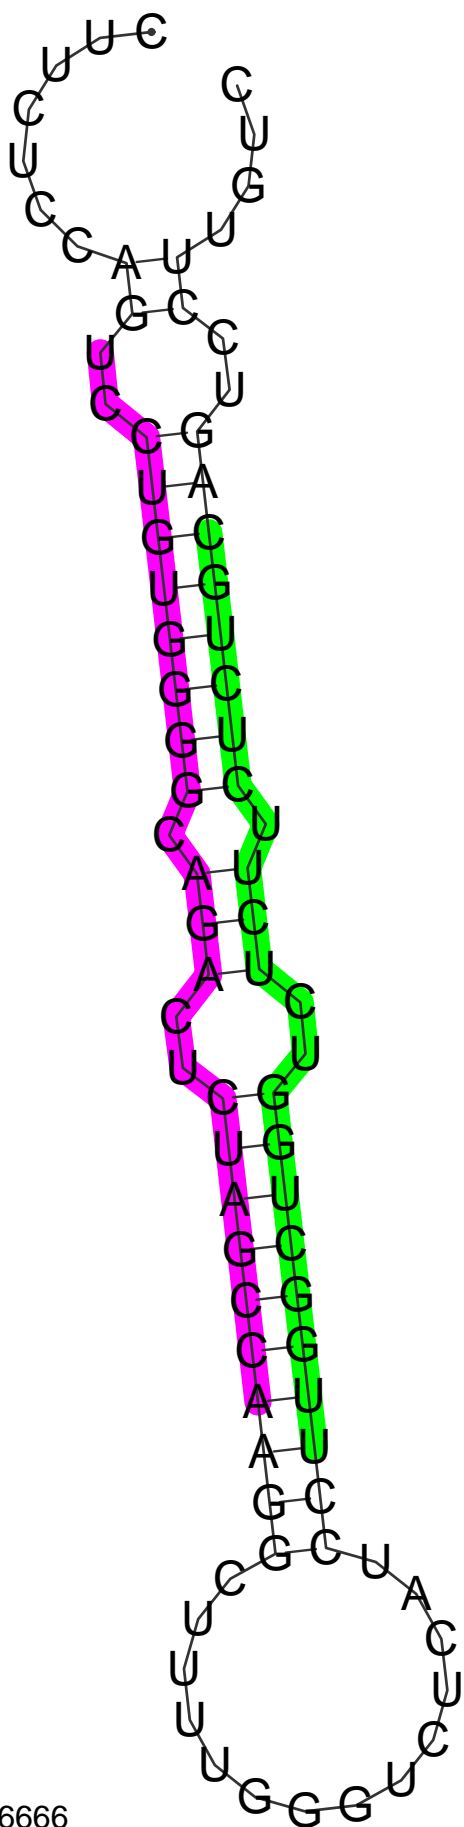

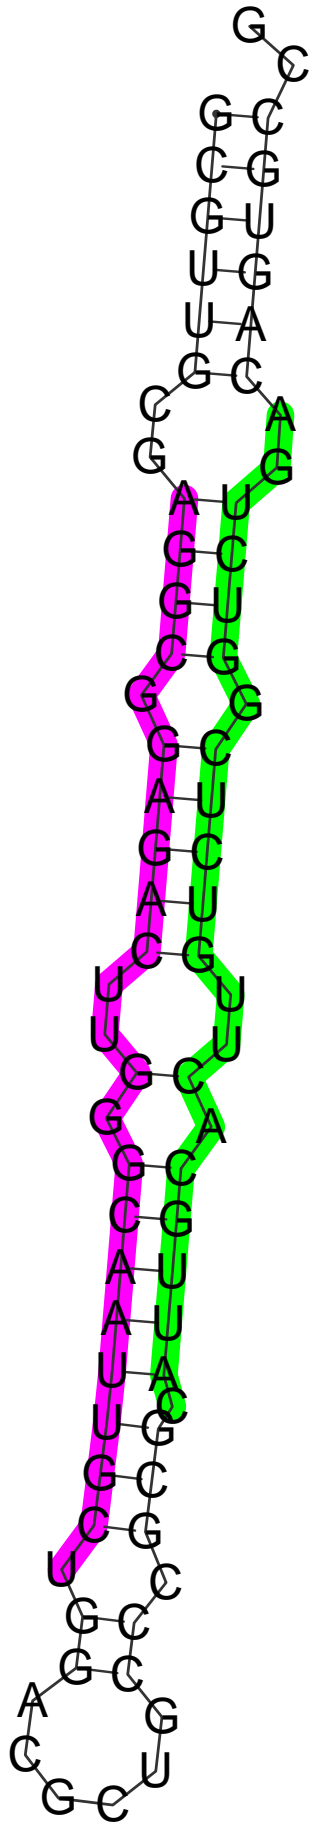

NW\_006385874.1\_351581-351655





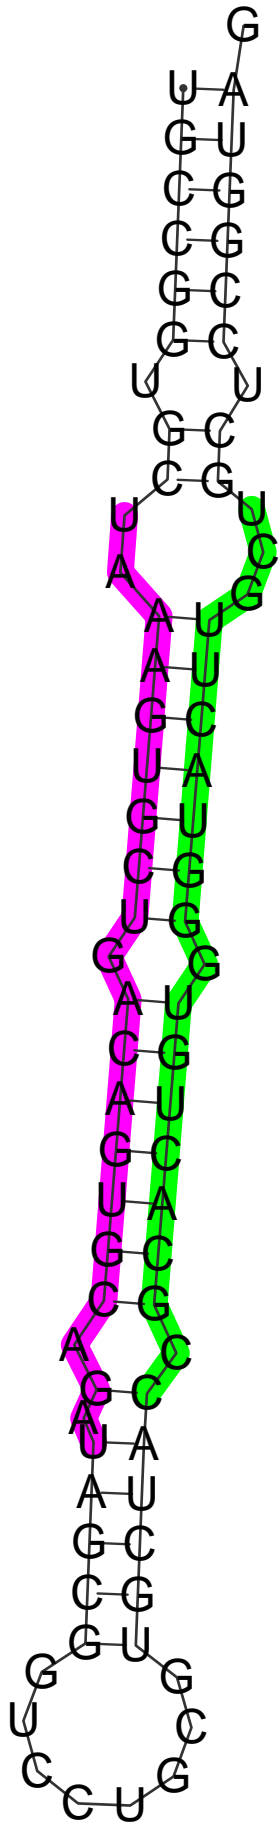



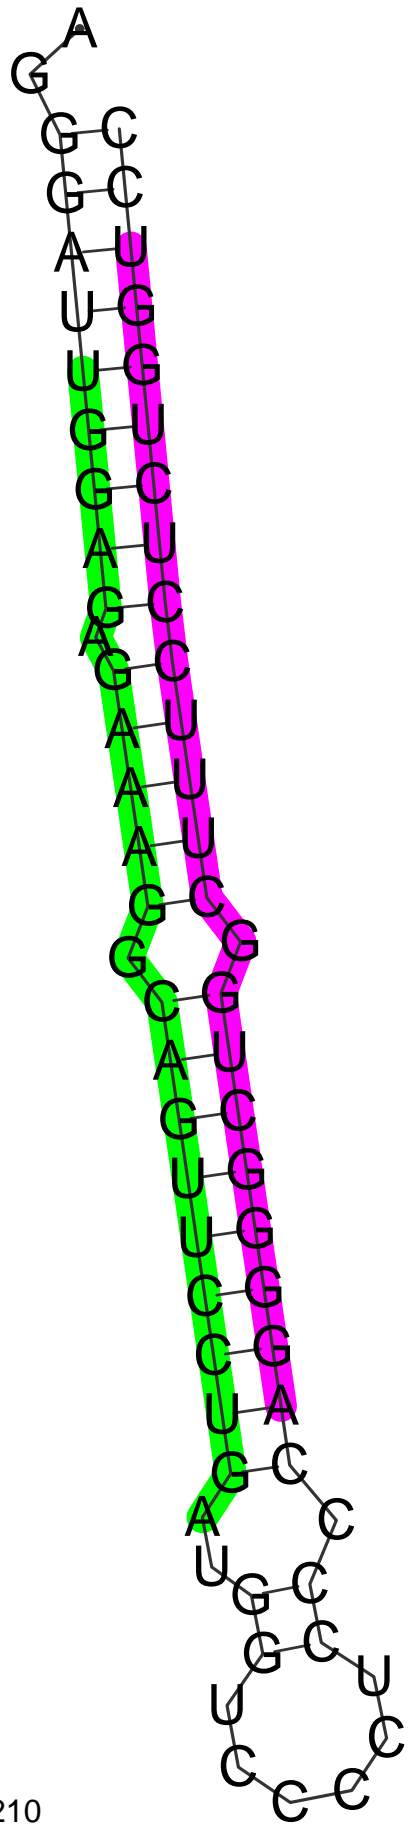

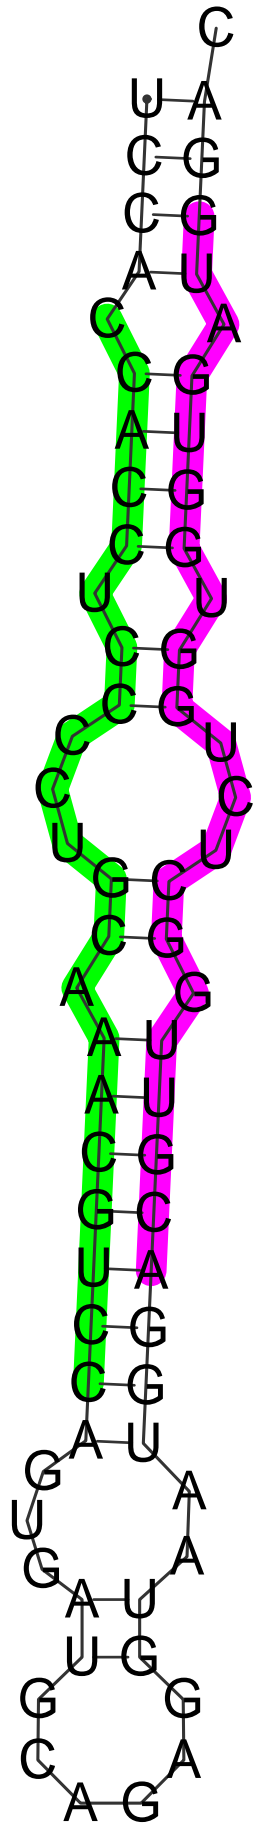

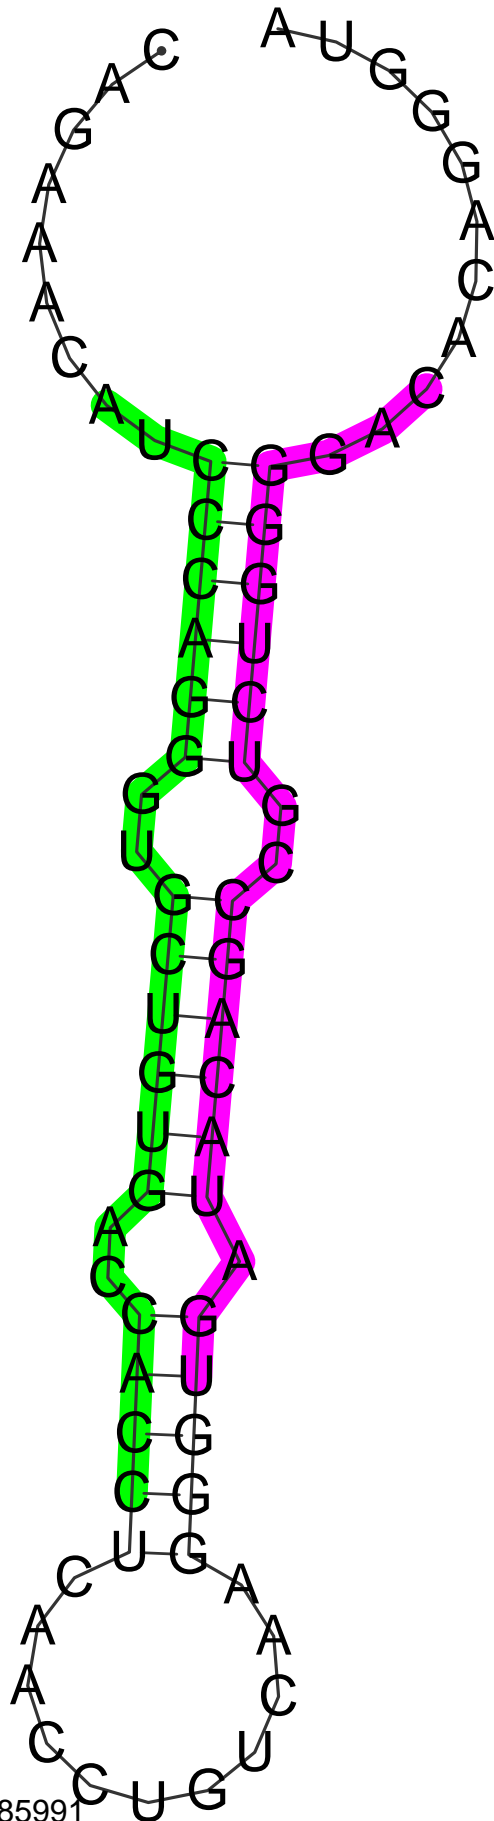

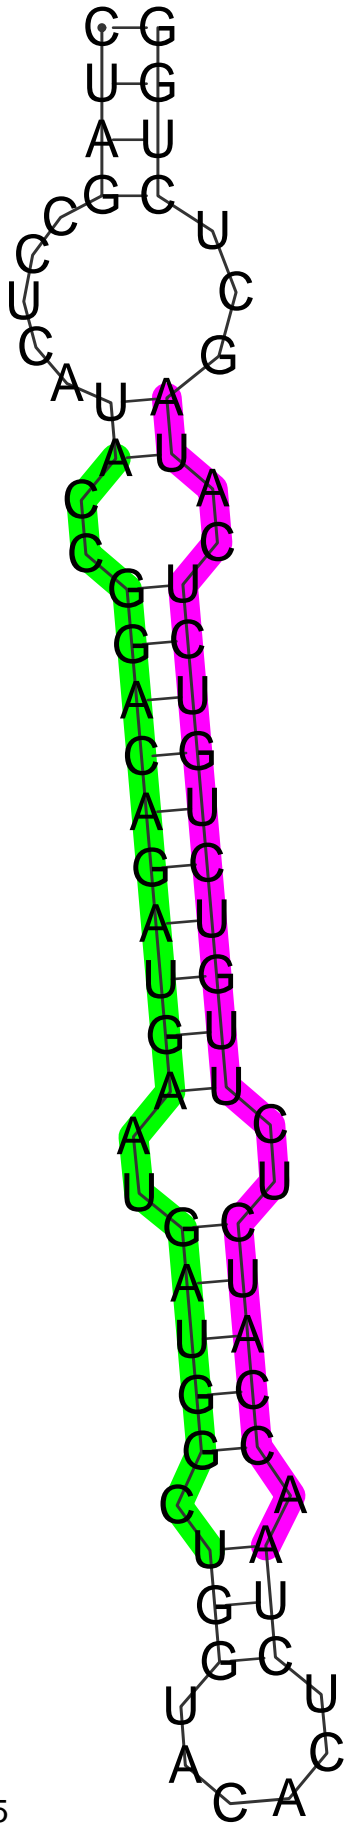





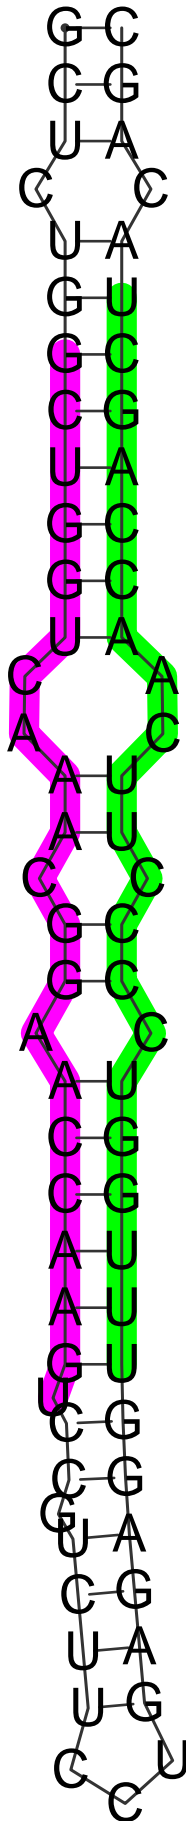

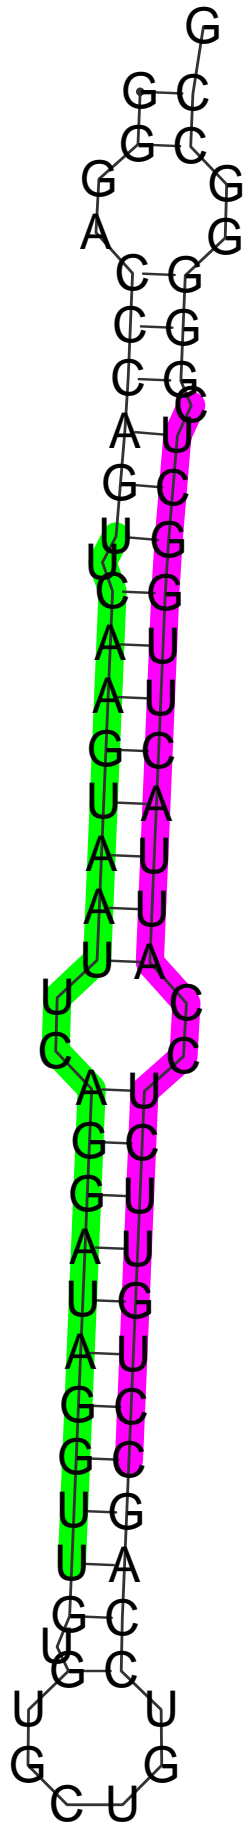

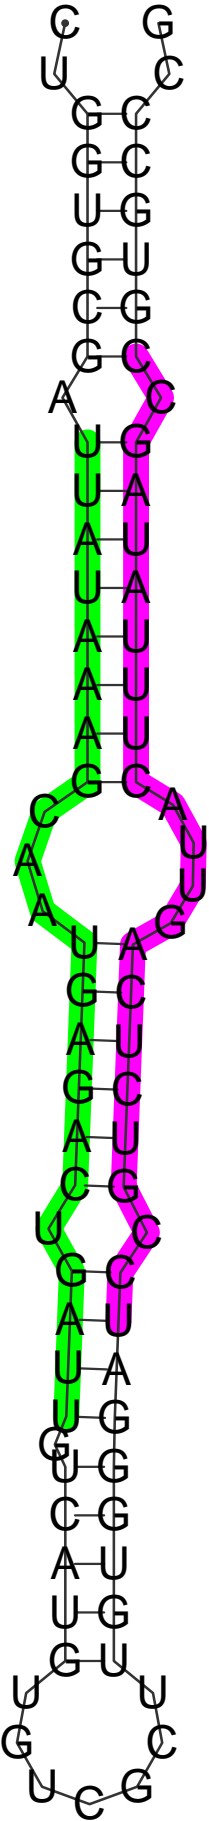

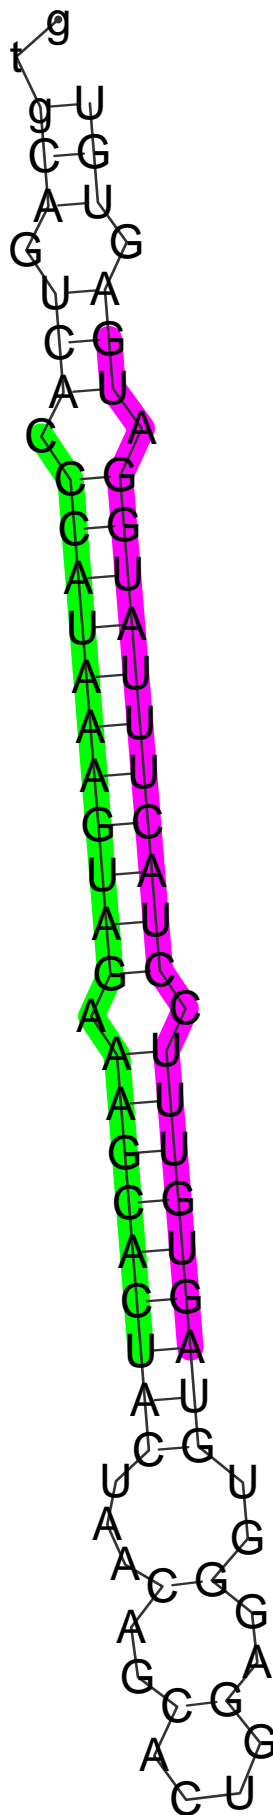

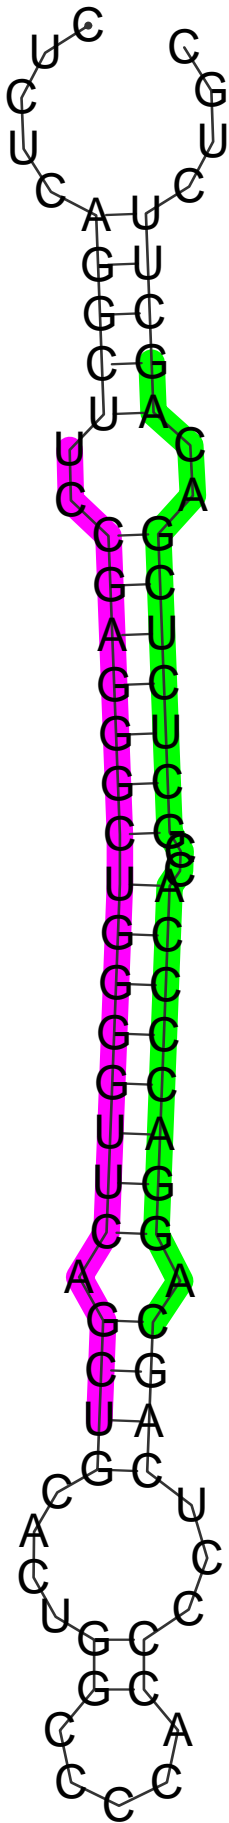

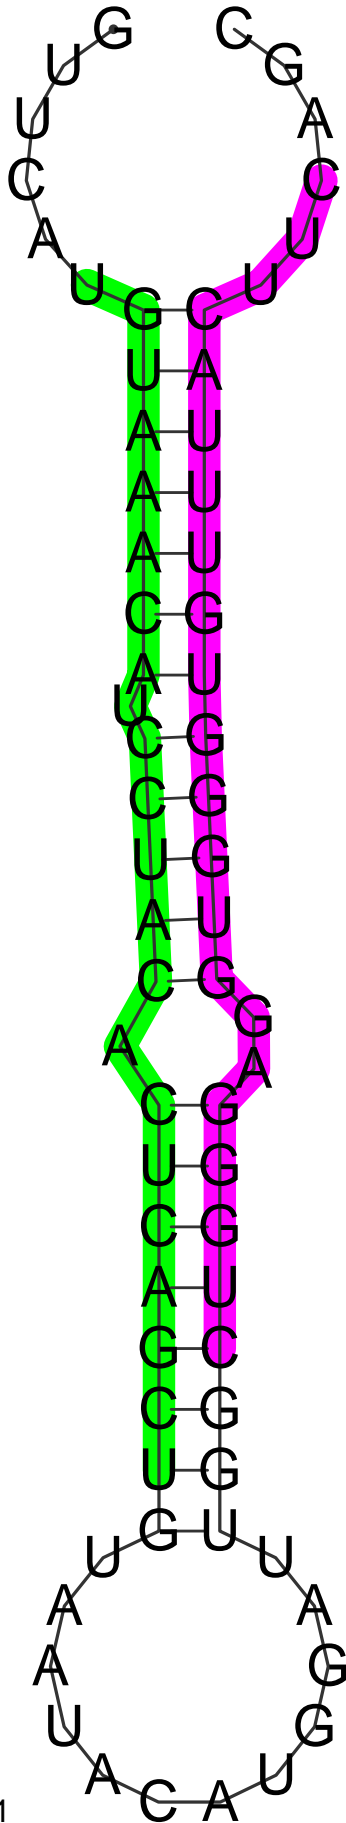

NW\_006386213.1\_119894-119961

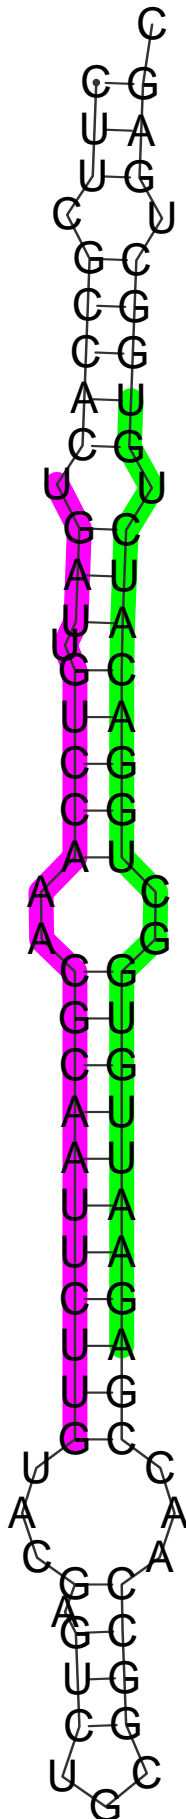

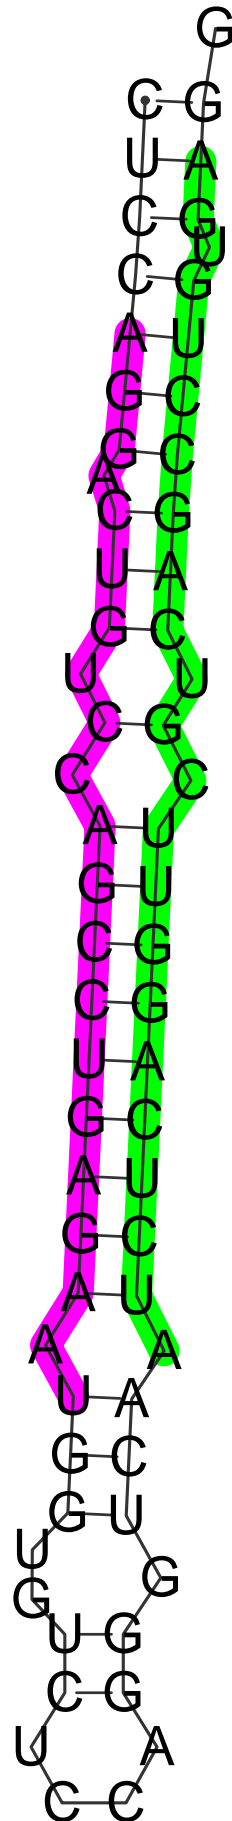



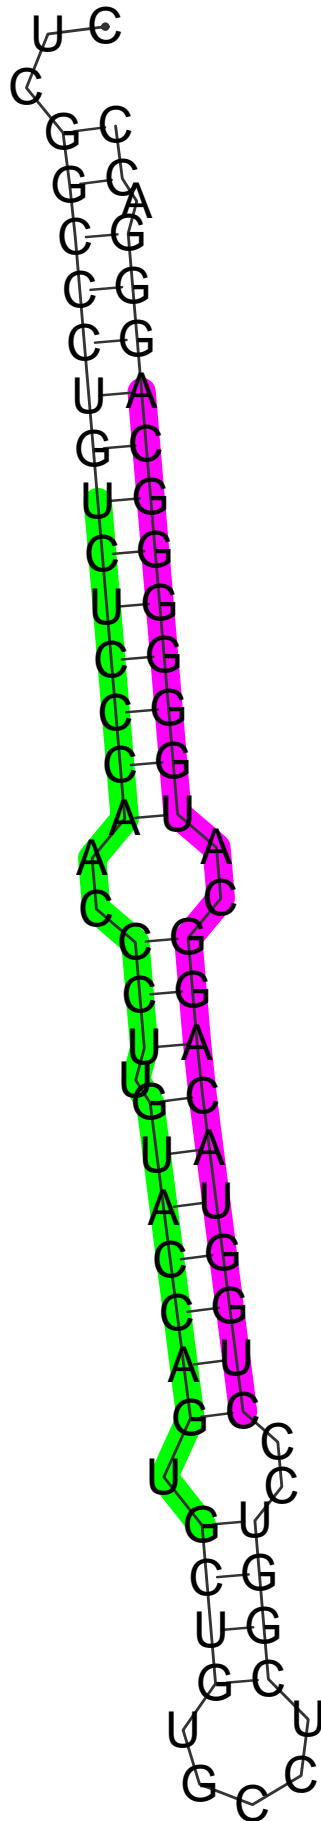

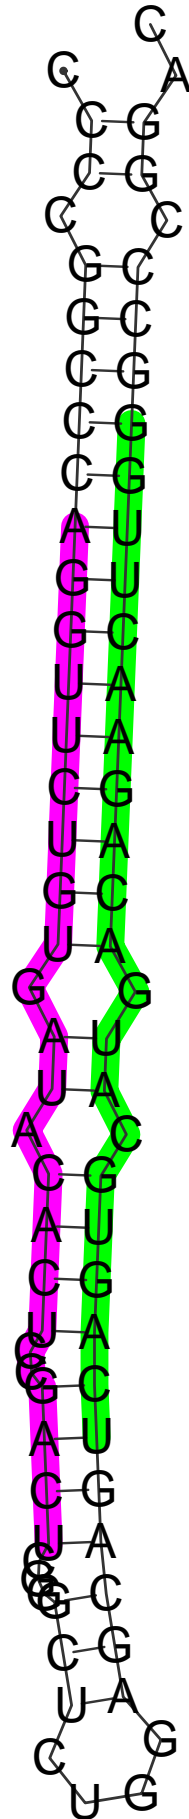

NW\_006386302.1\_60526-60601

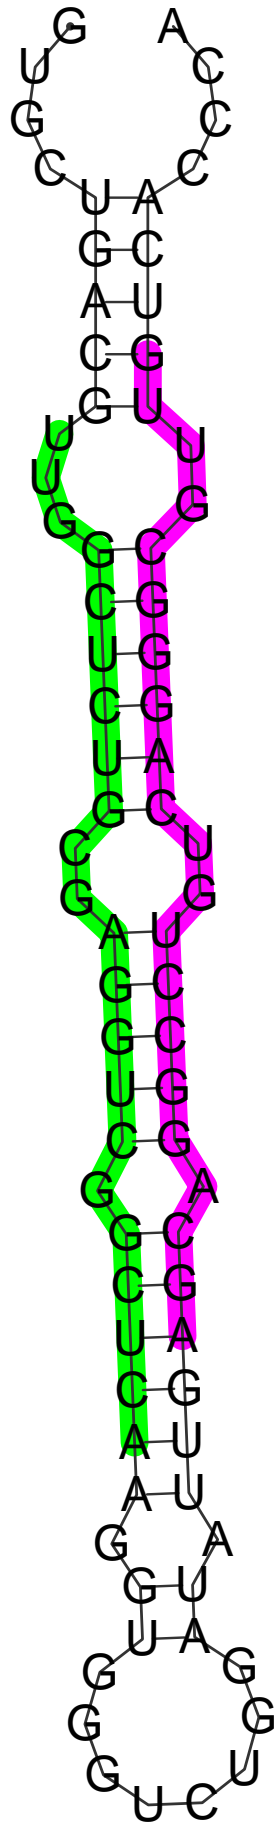

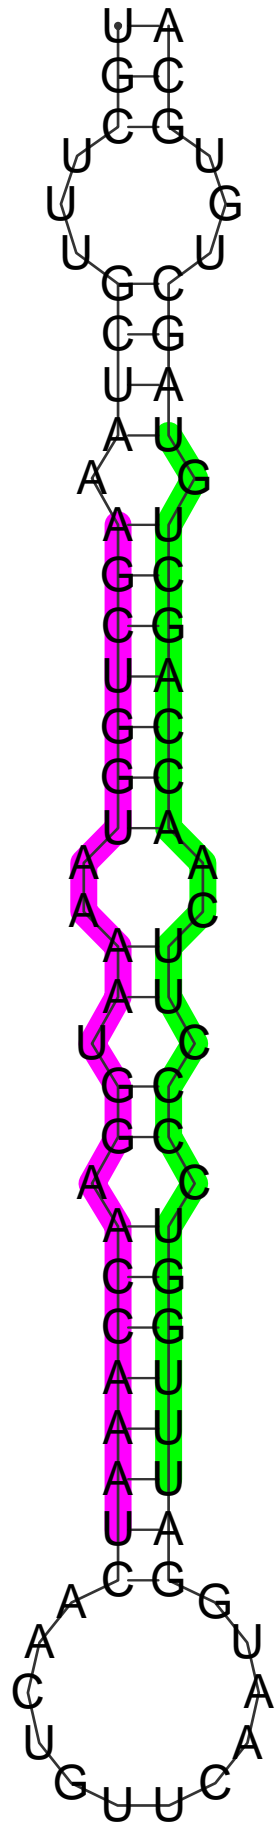



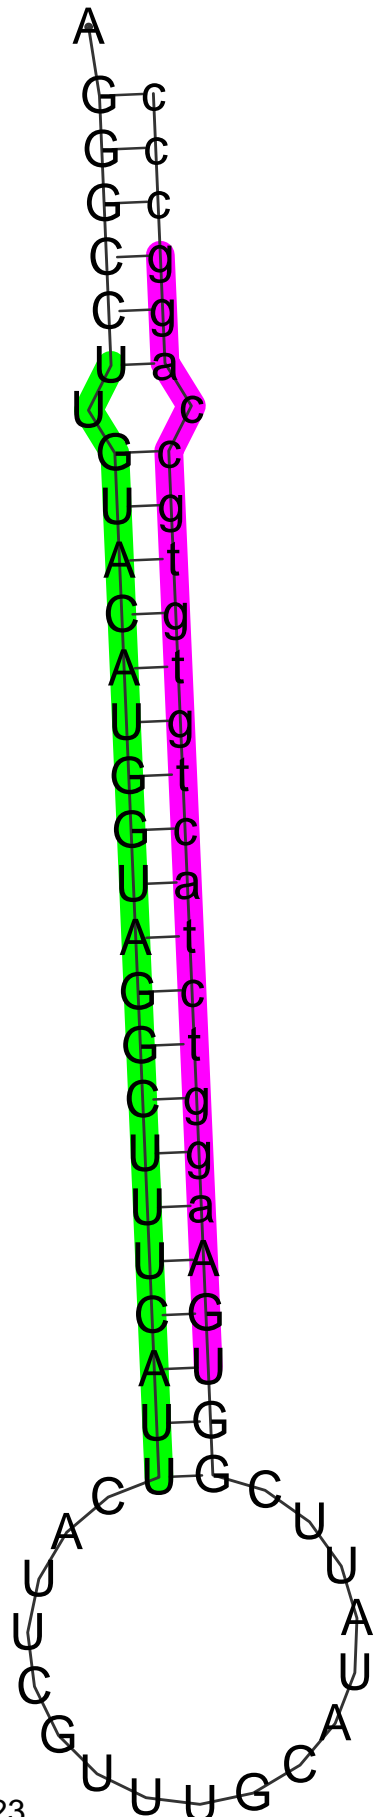



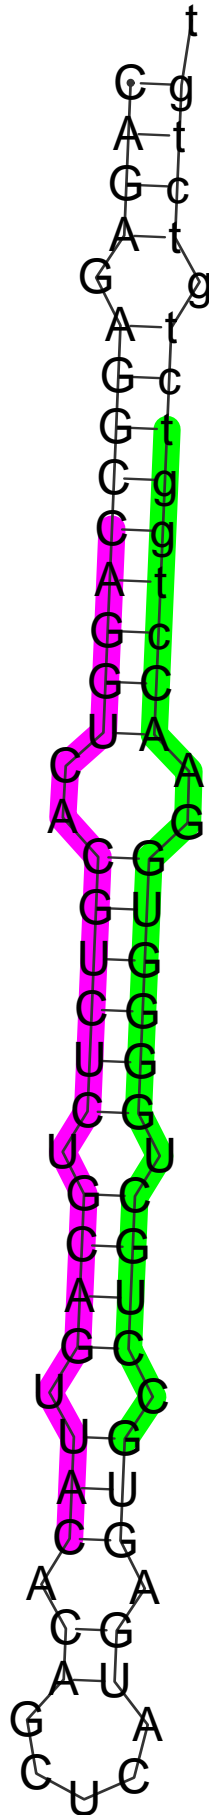



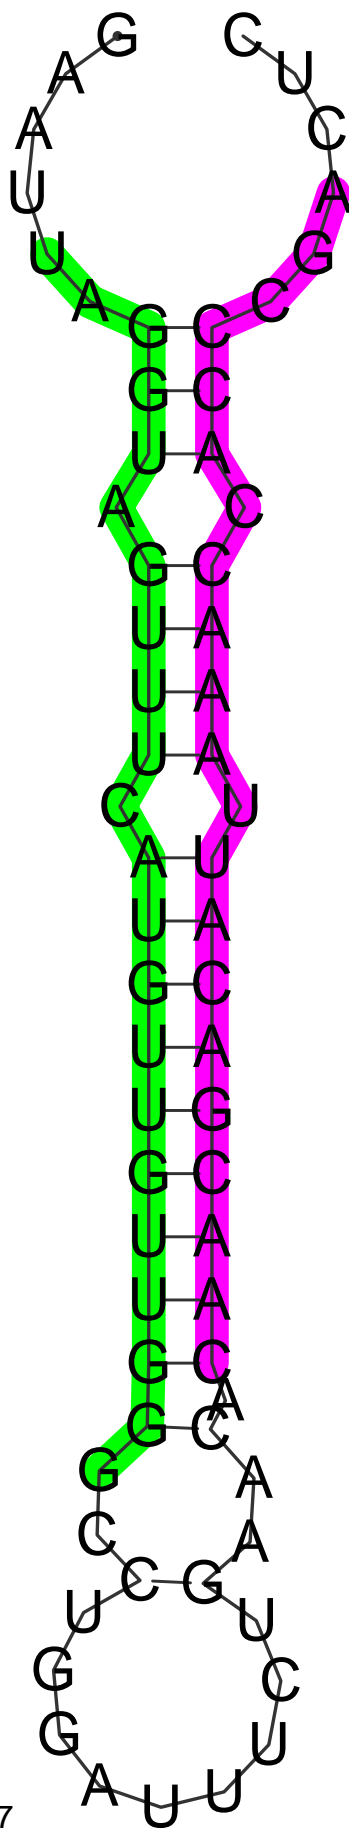



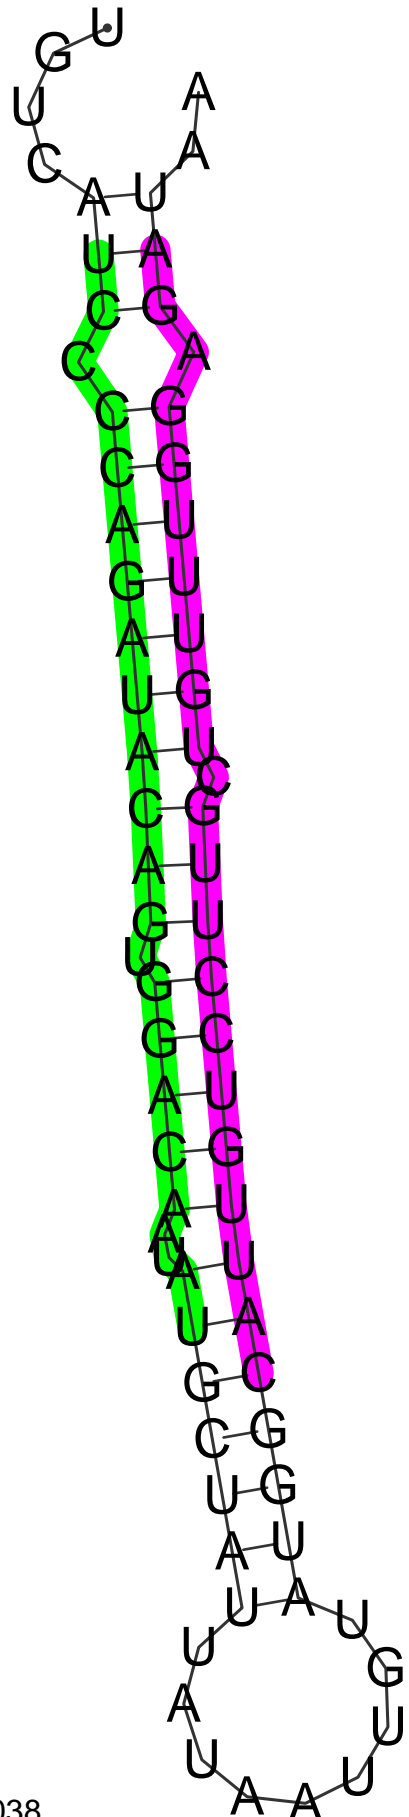

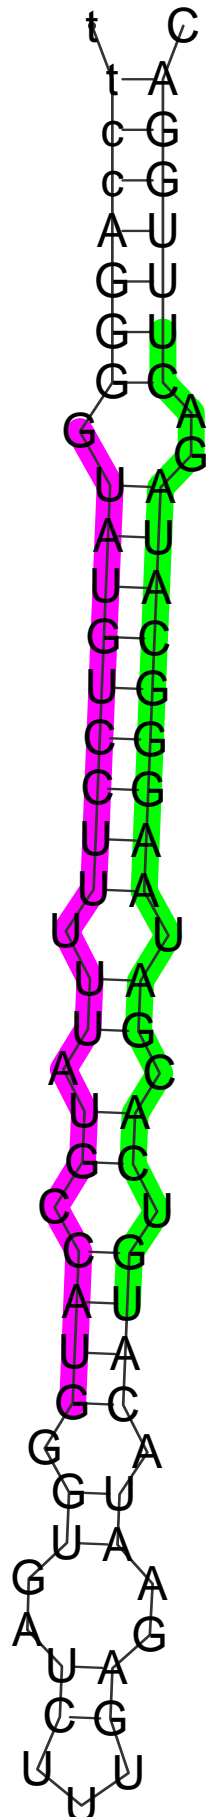

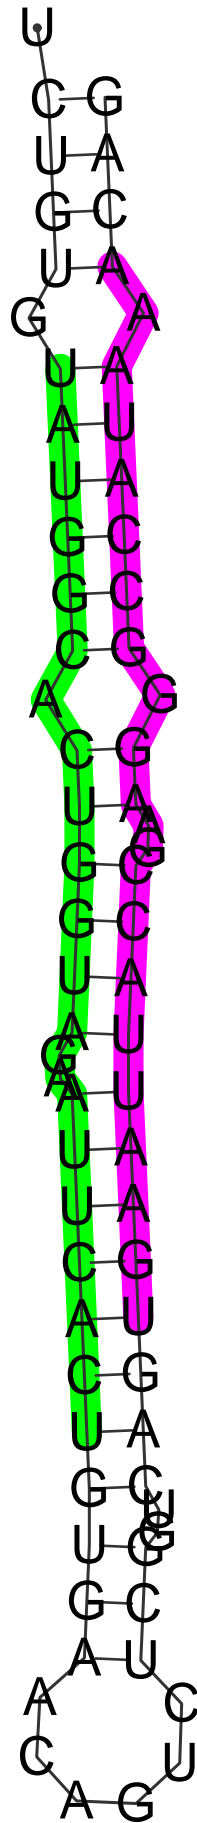

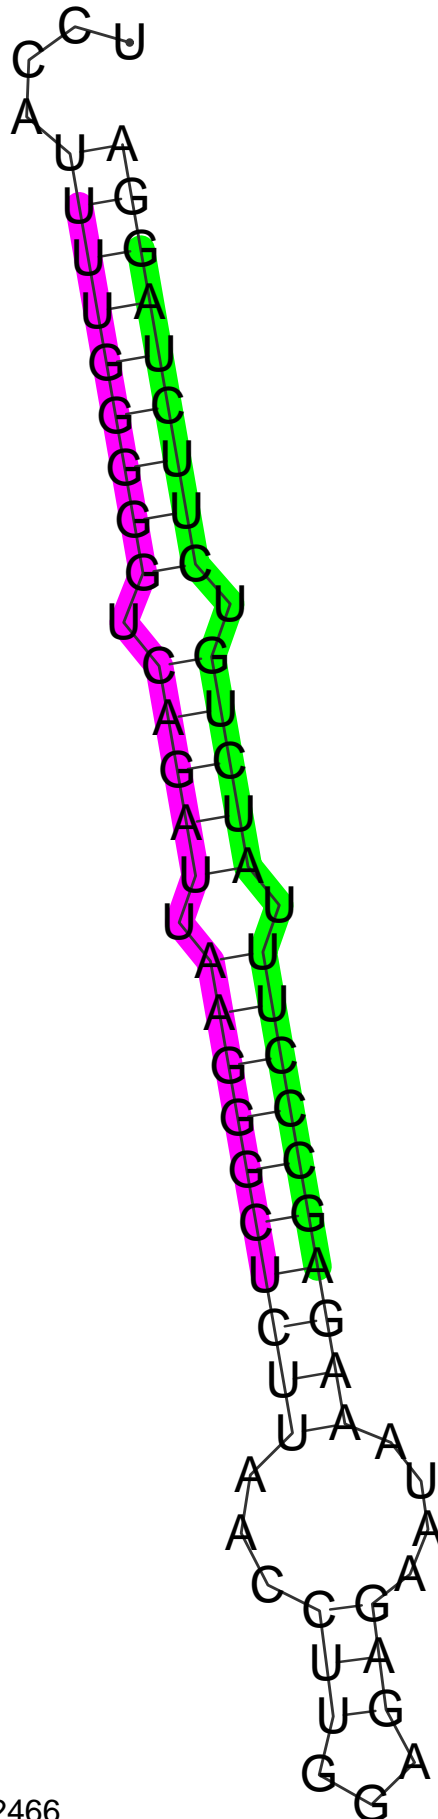







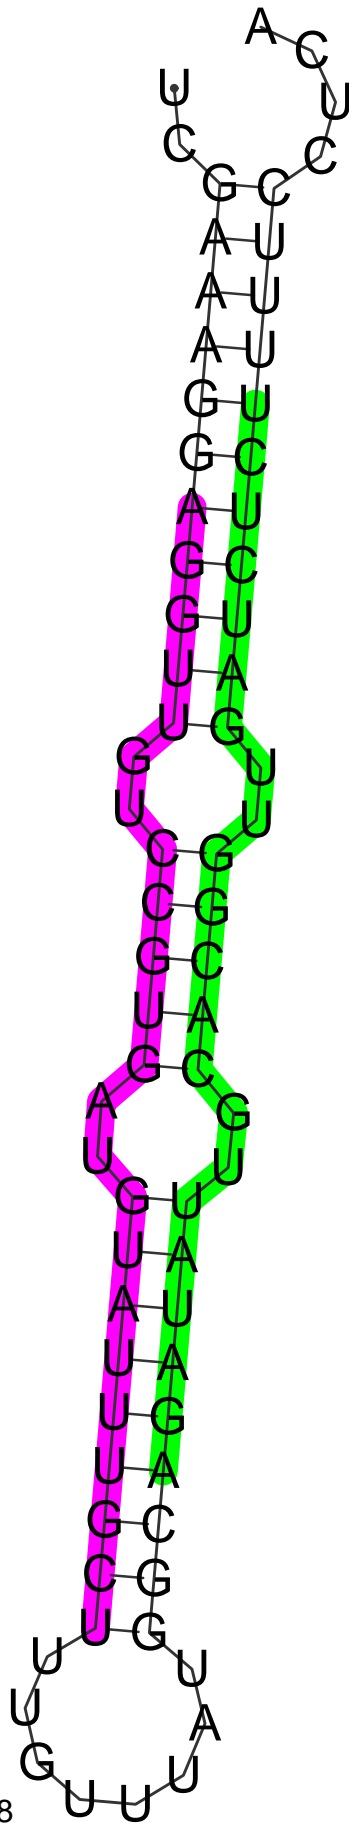



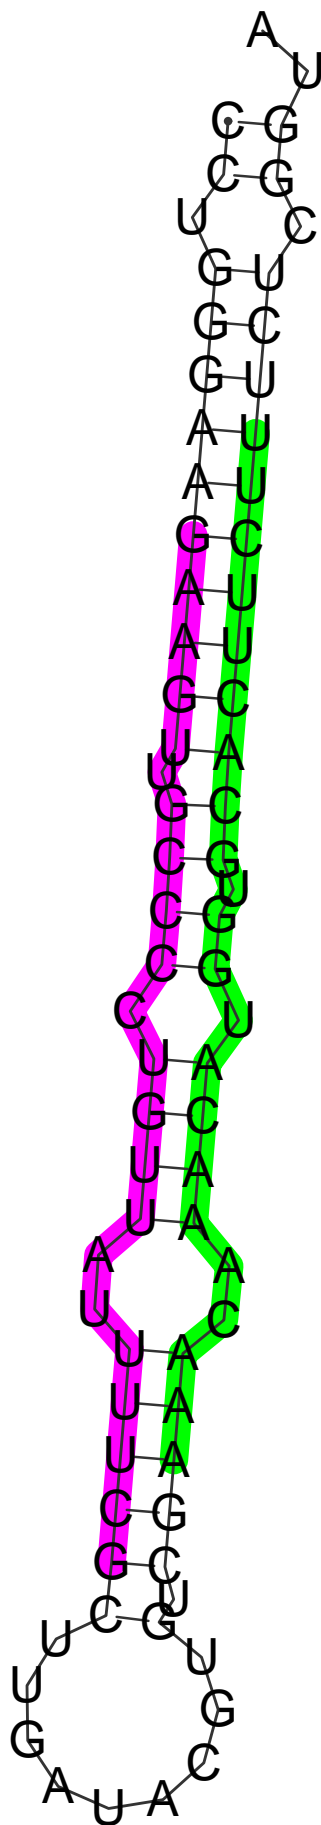

NW\_006386594.1\_103532-103605





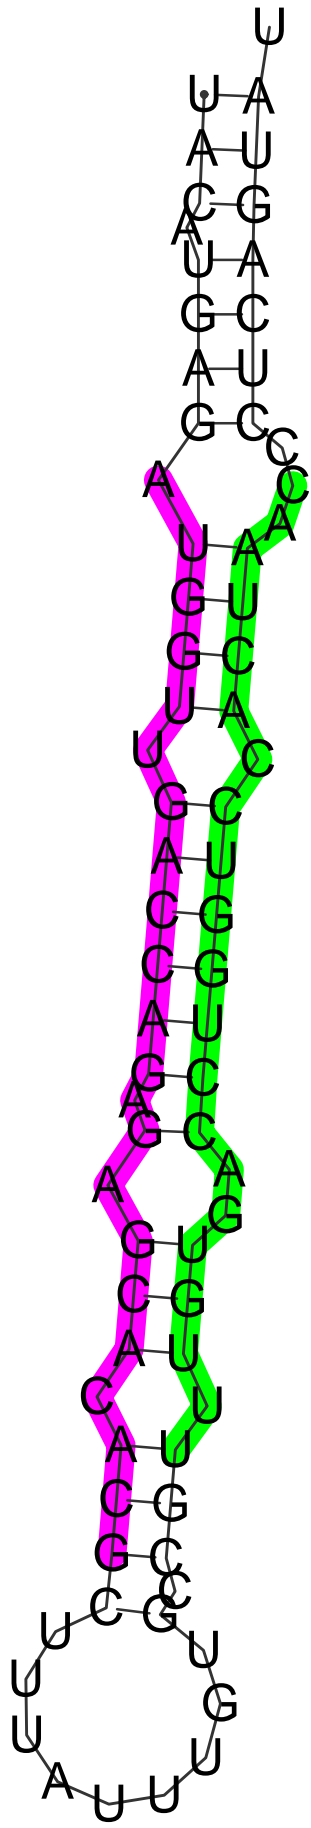



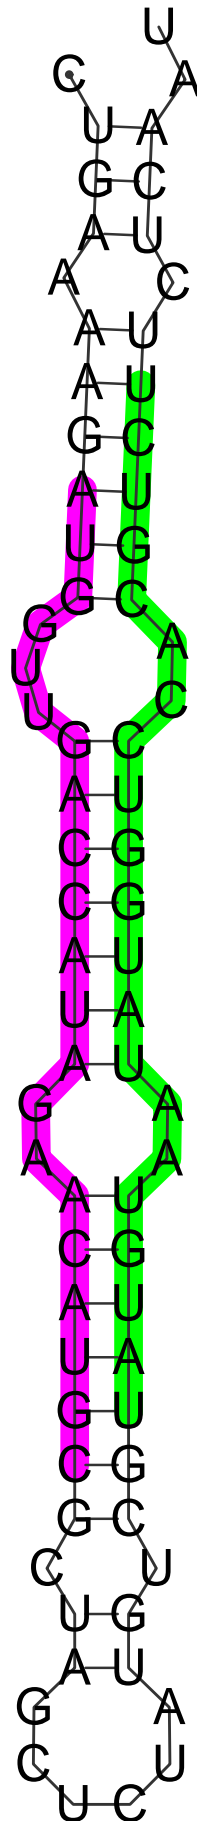





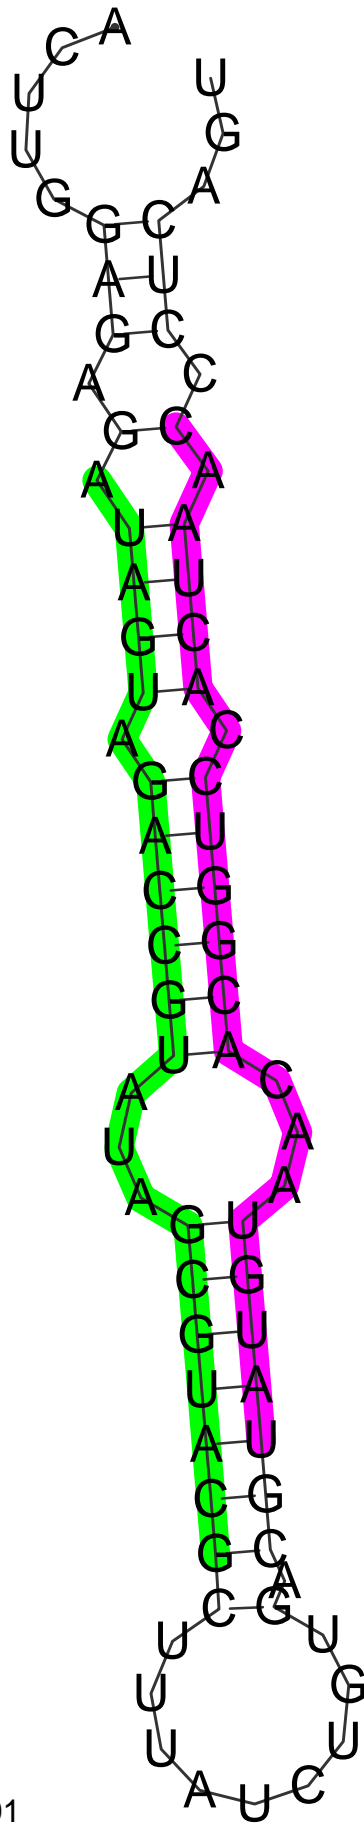

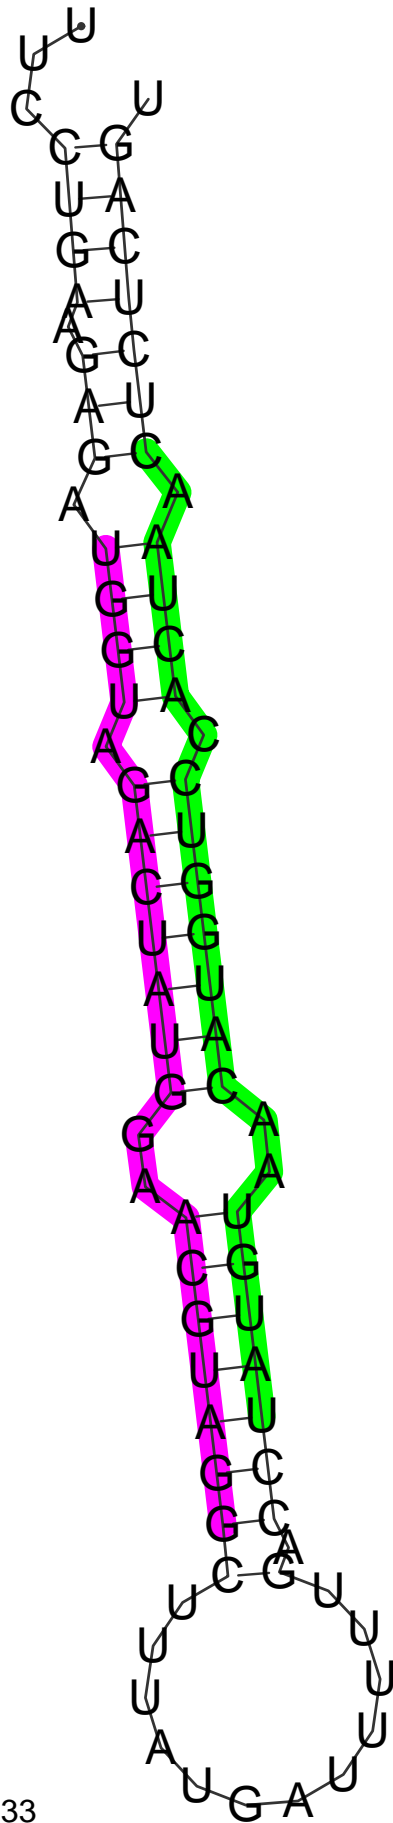



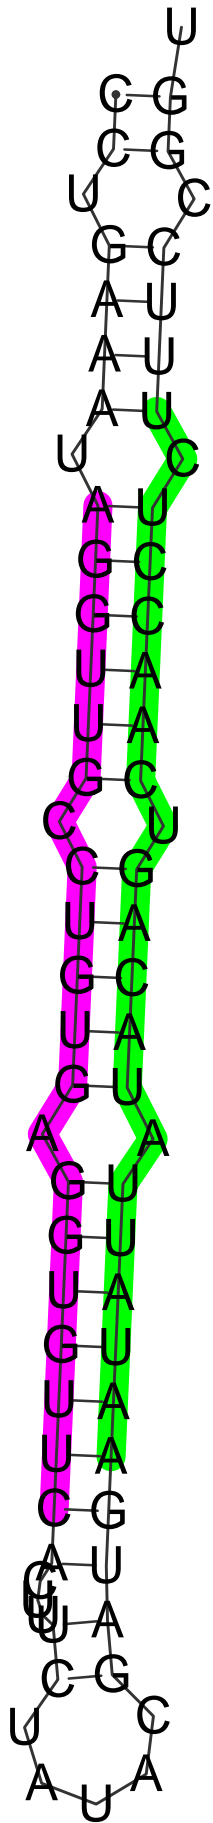

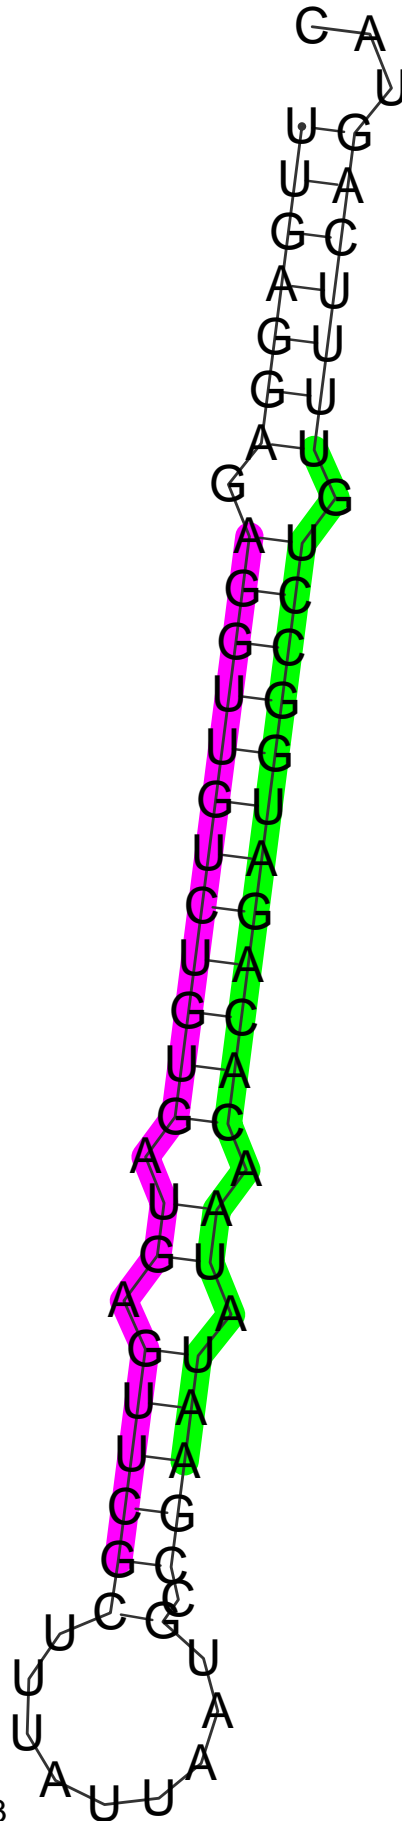

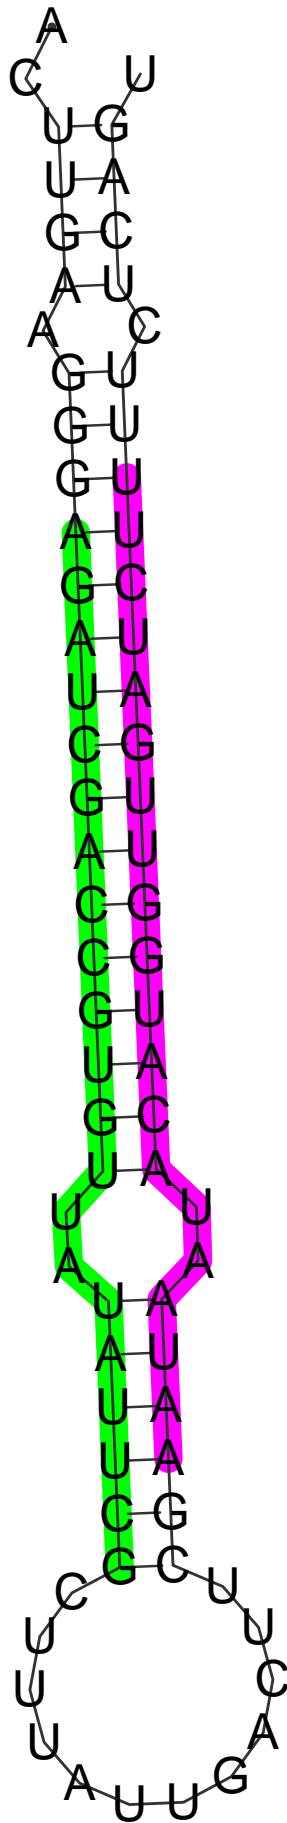

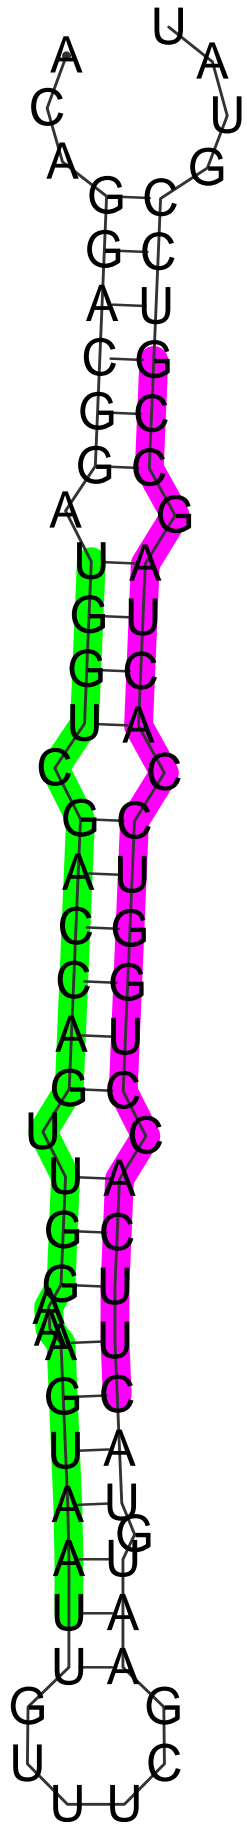



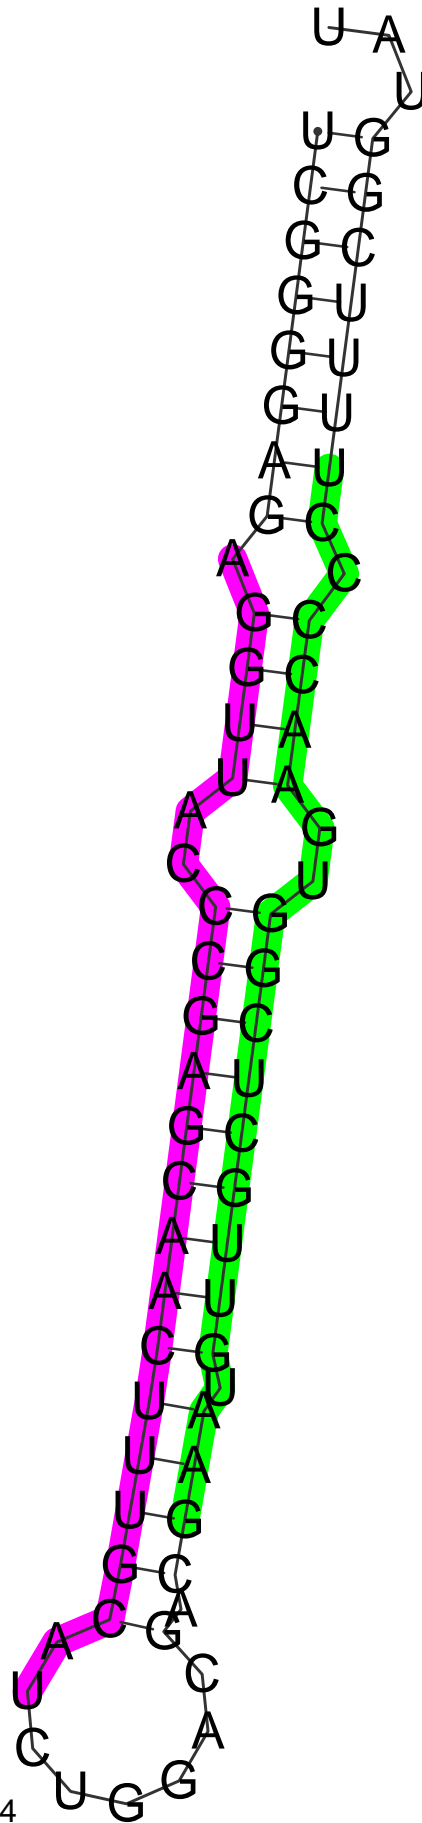

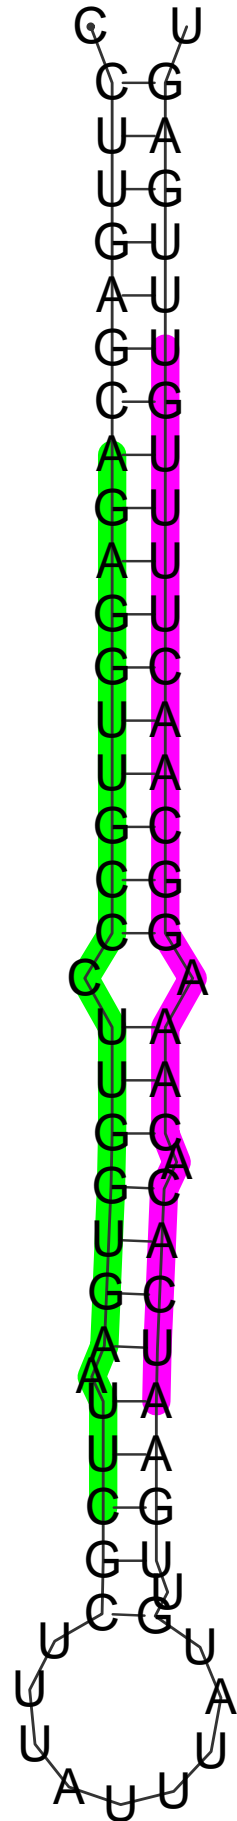





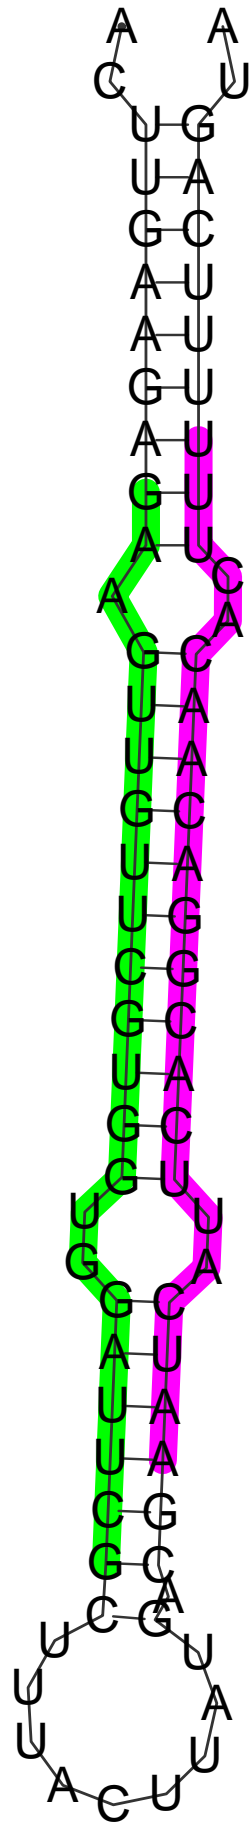











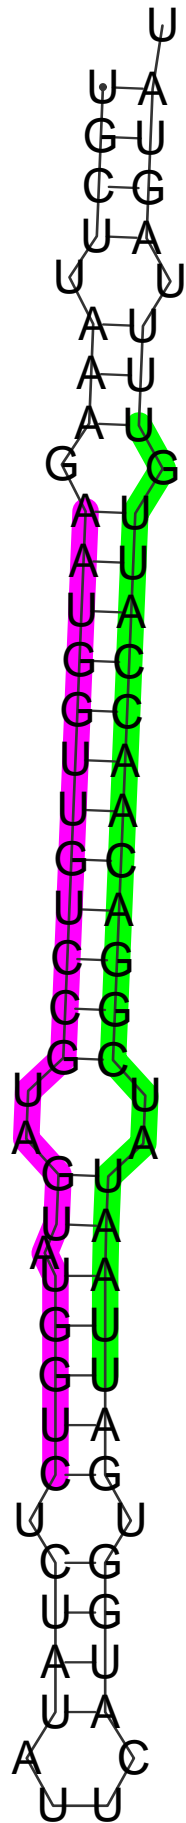





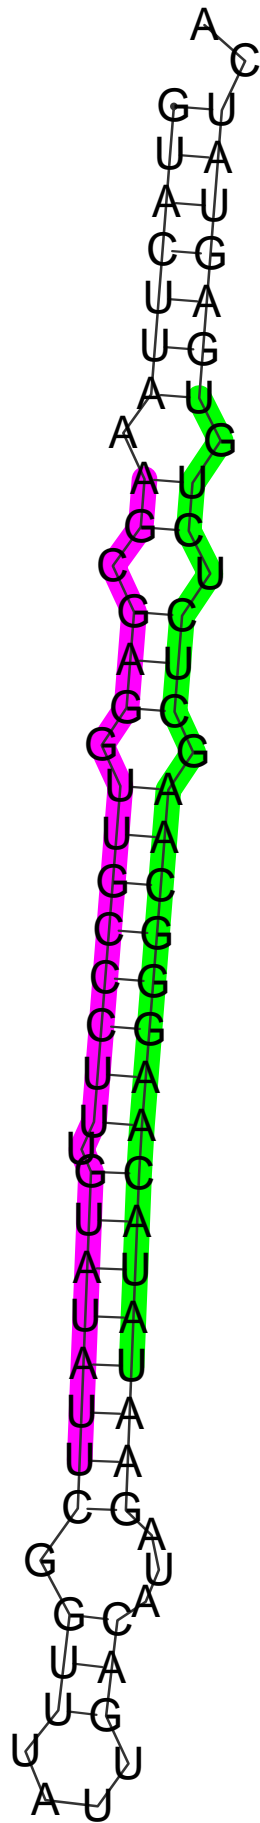



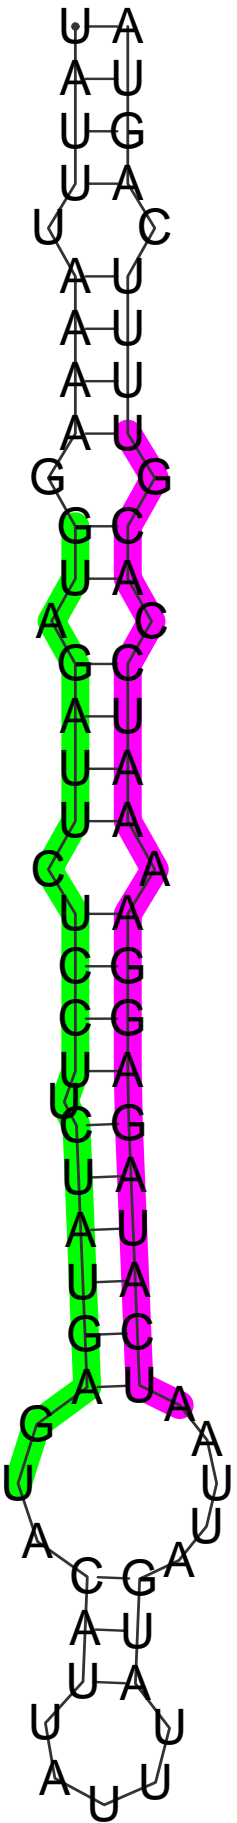









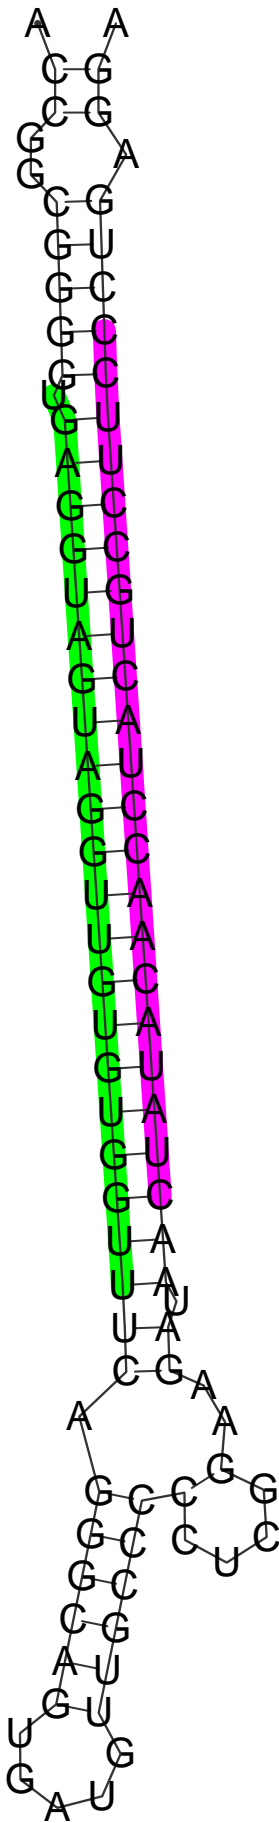

NW\_006386630.1\_100517-100609

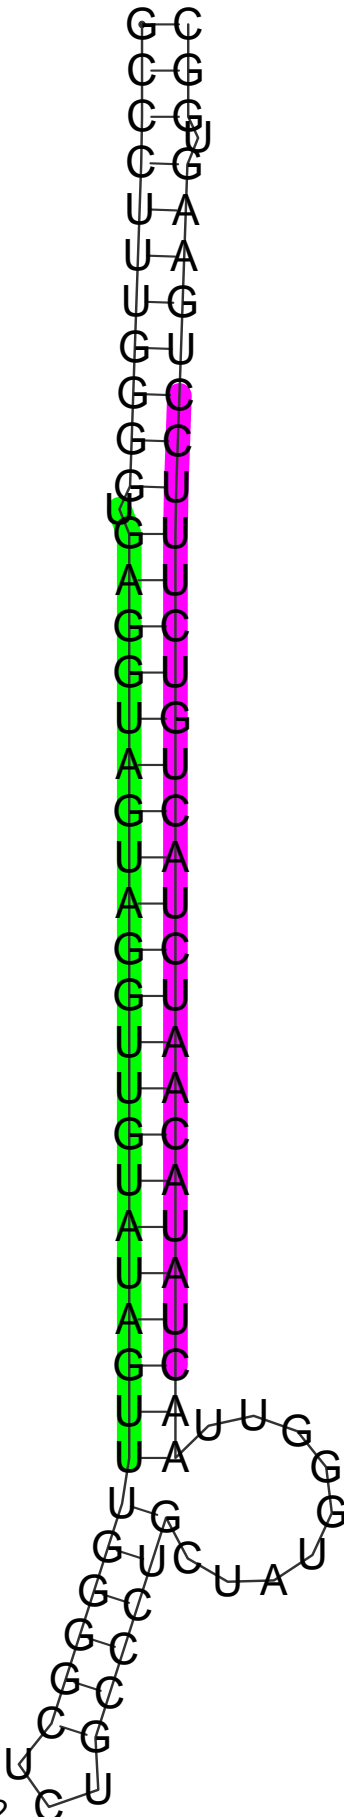

NW\_006386630.1\_101433-101522

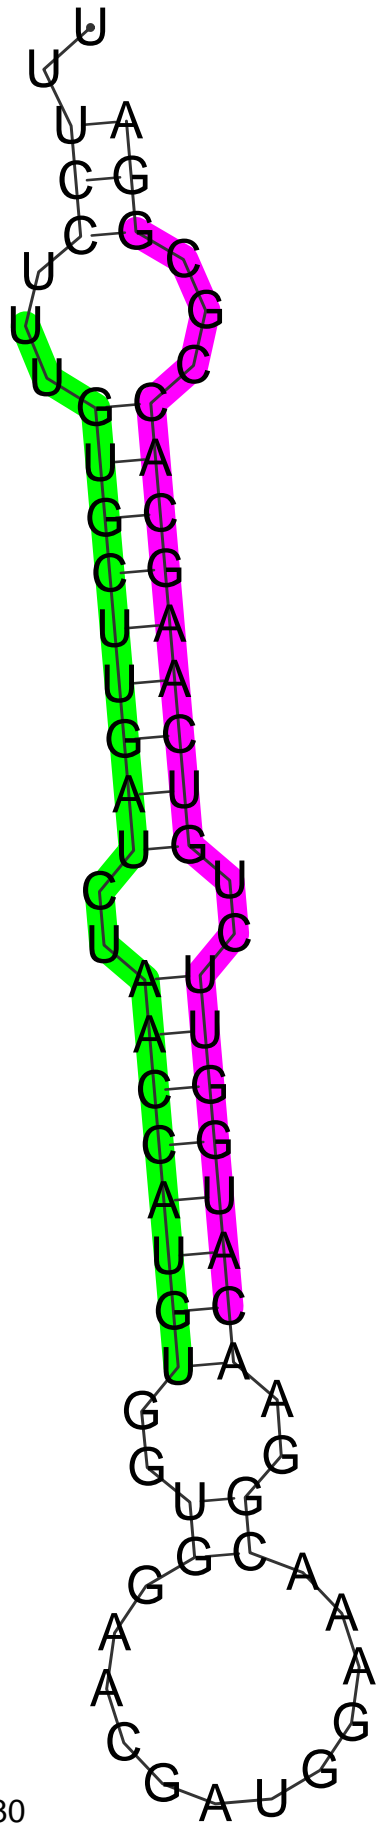









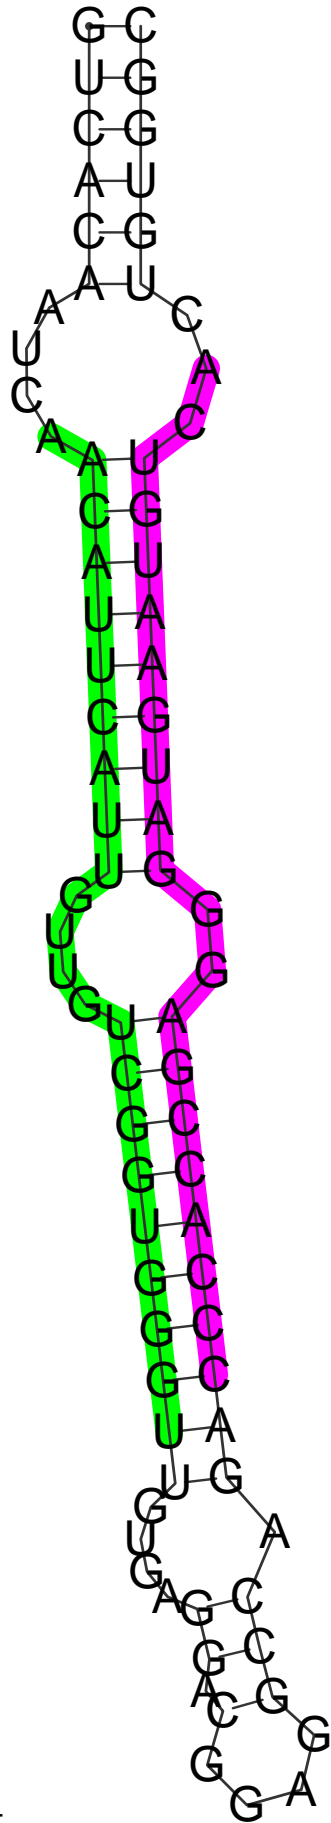

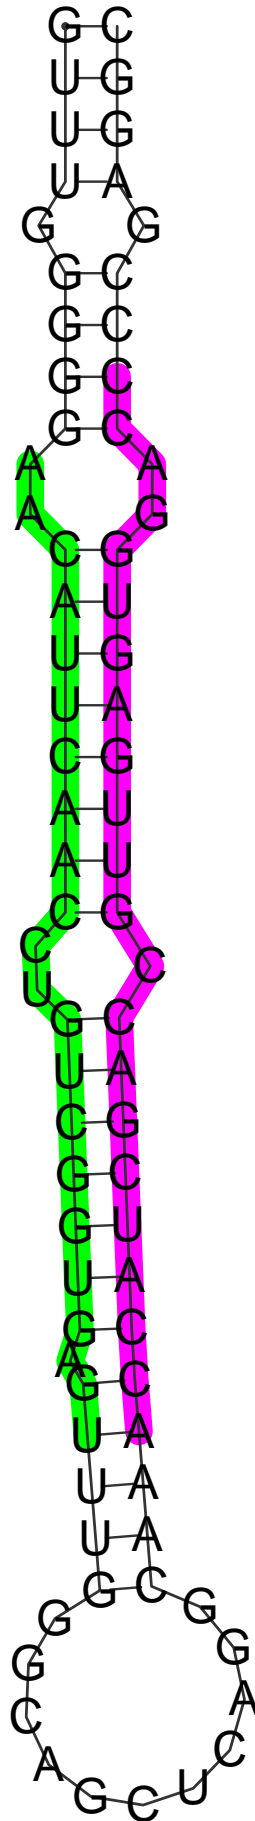





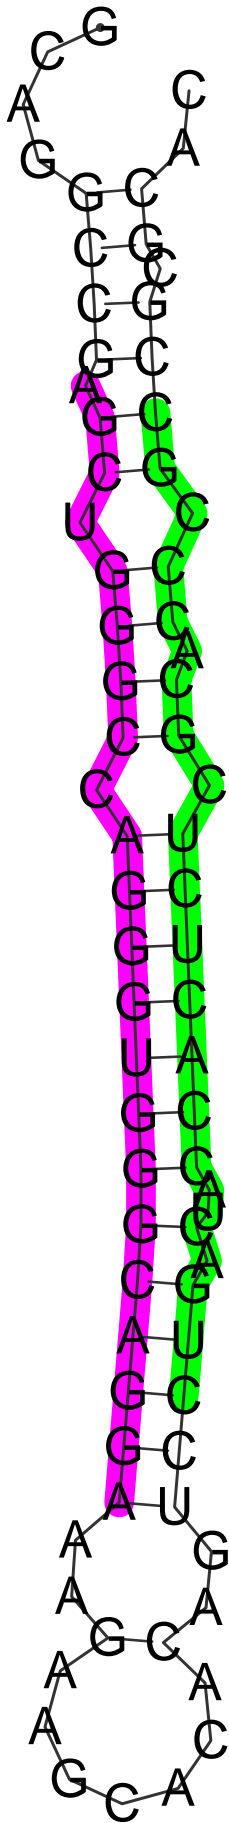

















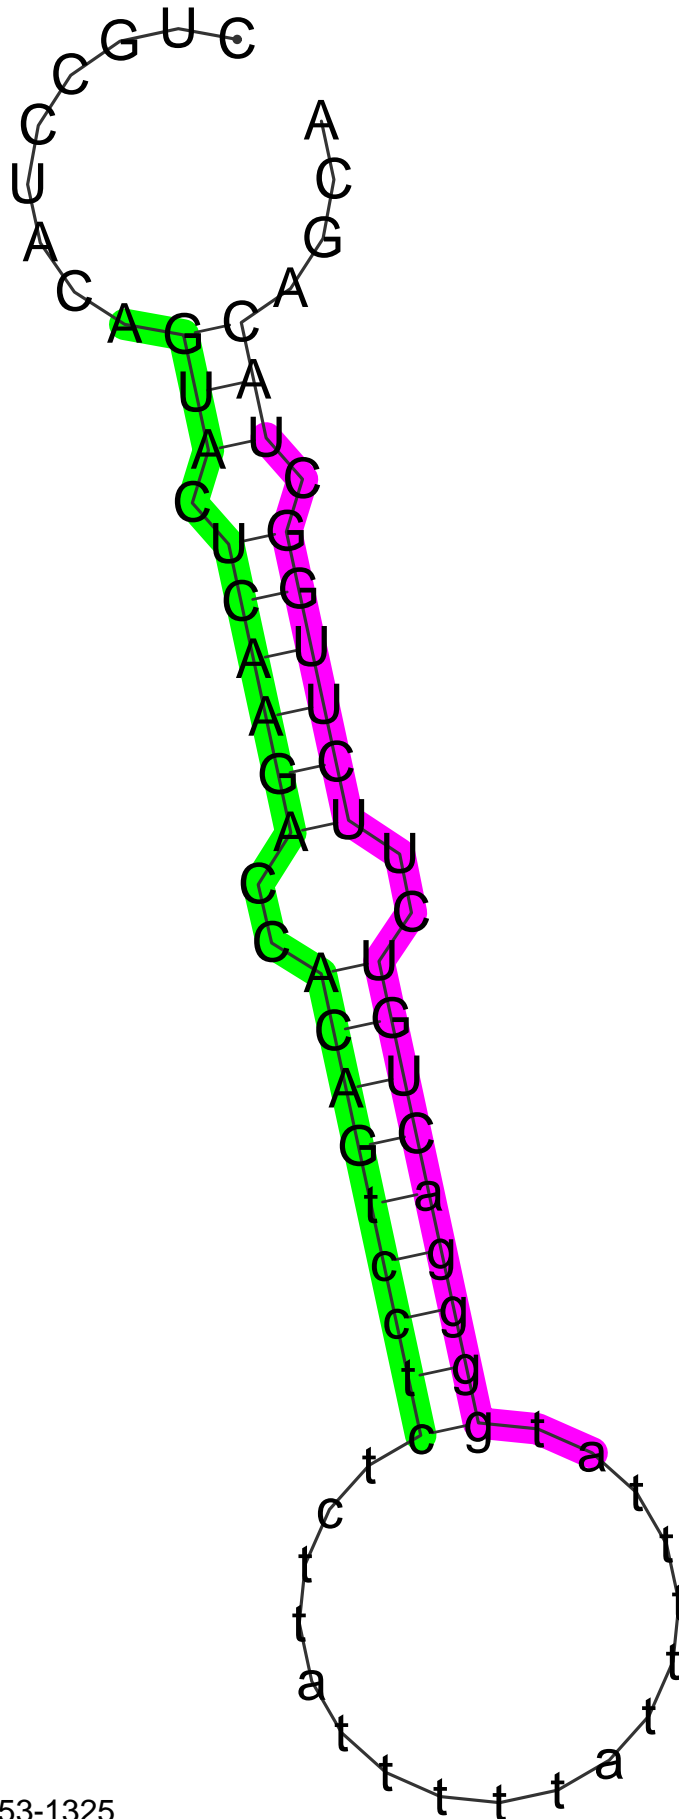













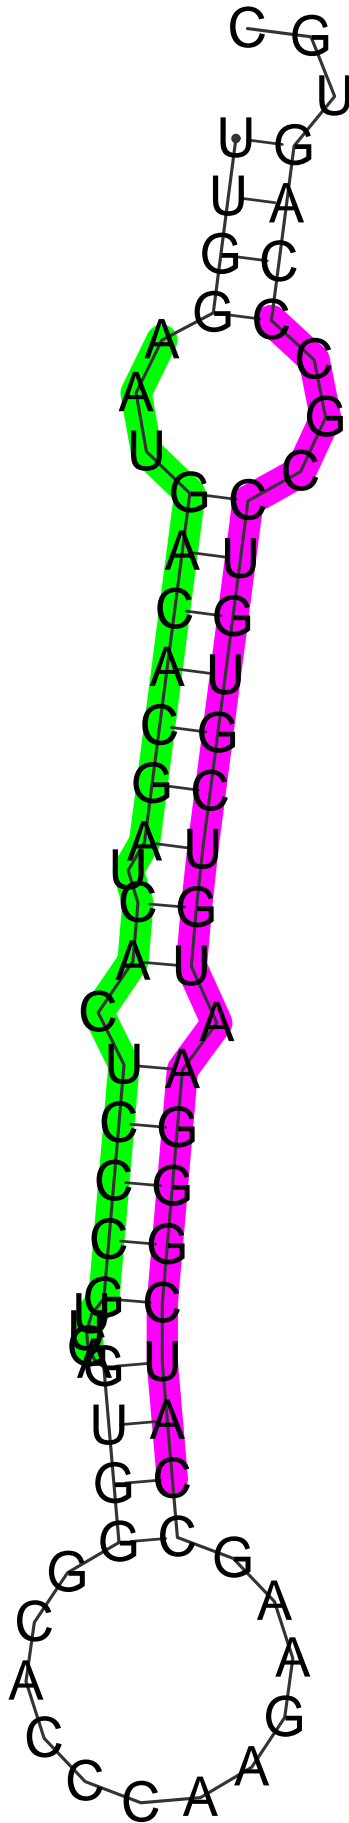







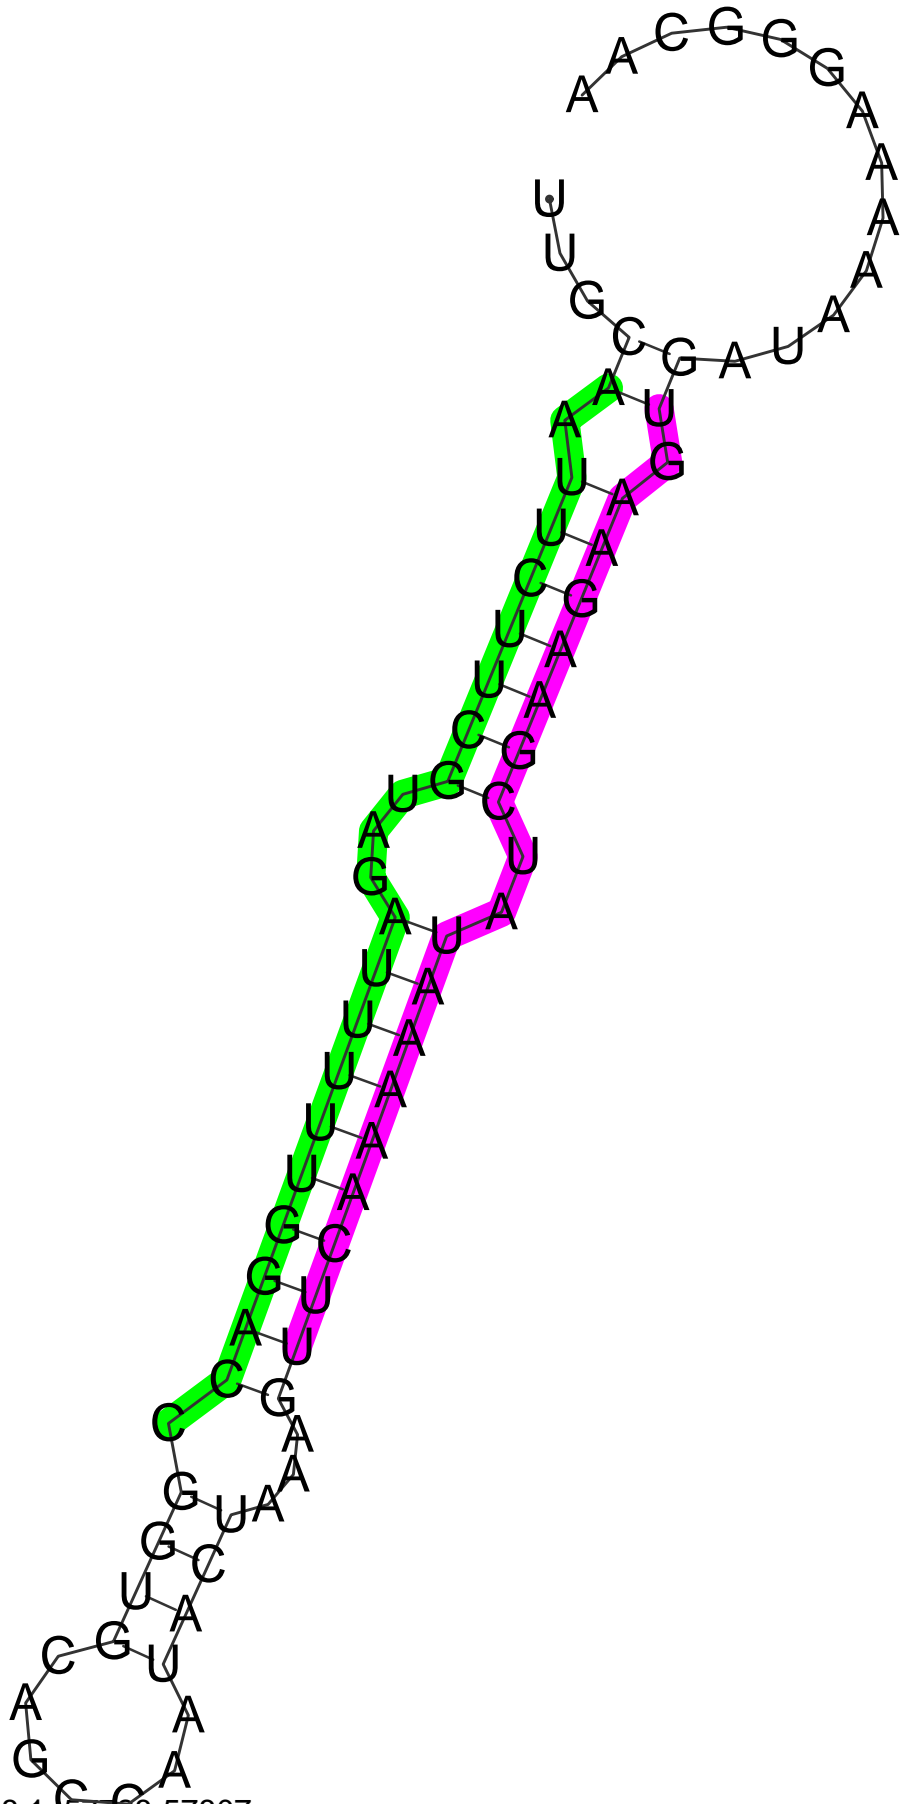

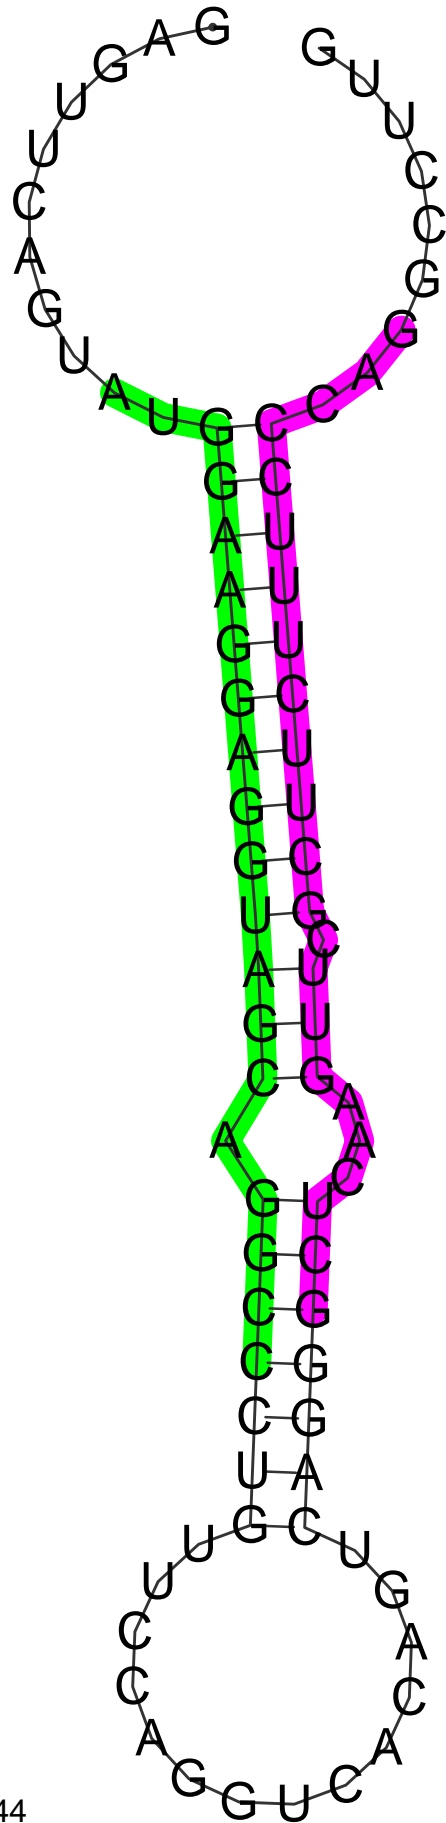







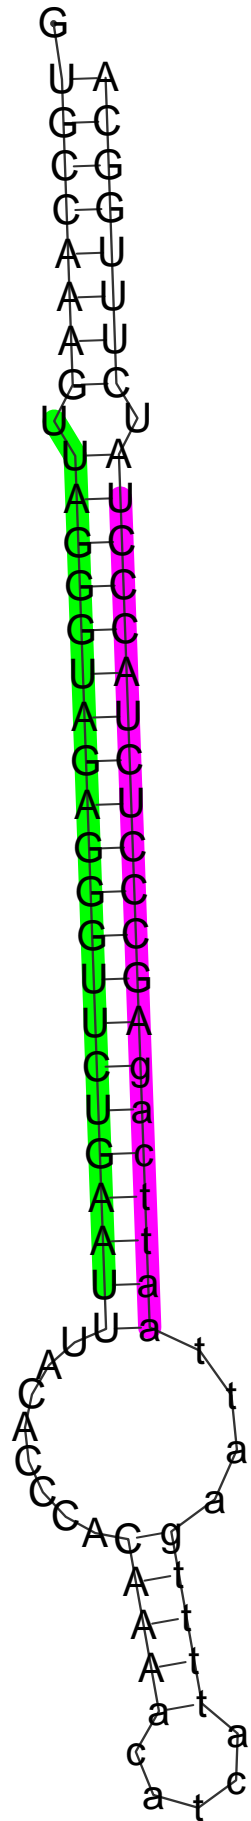

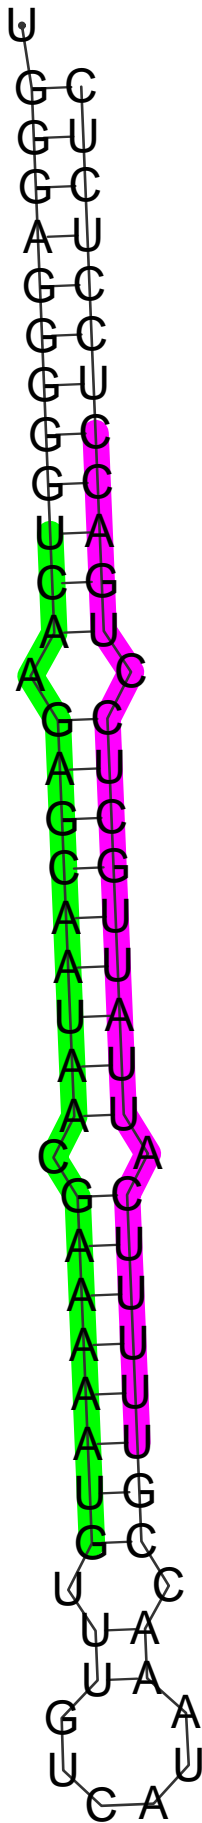







Supplementary Figure S5. Abundance plots for all 559 annotated miRNA loci. Abundance (y axis) along the hairpin sequence (x axis) is defined as reads per million genome matching. Colors separate tissues, while fill and dotted lines denote pup and adult individuals, respectively.



# lwe-miR-92c\_loc1

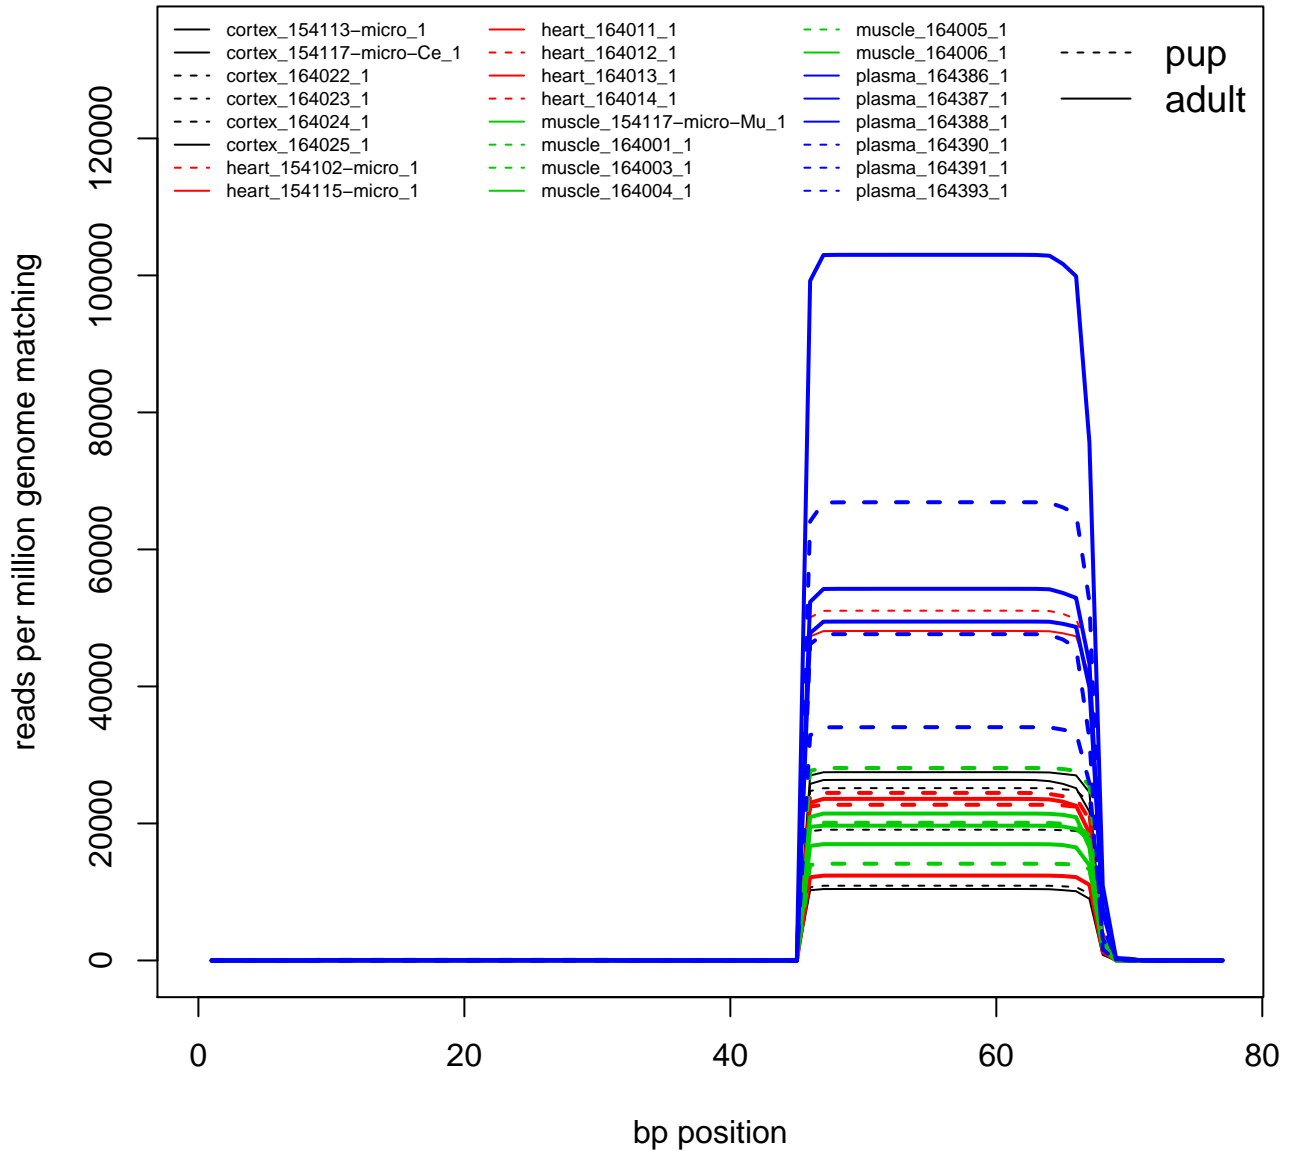

# lwe-miR-19\_loc1

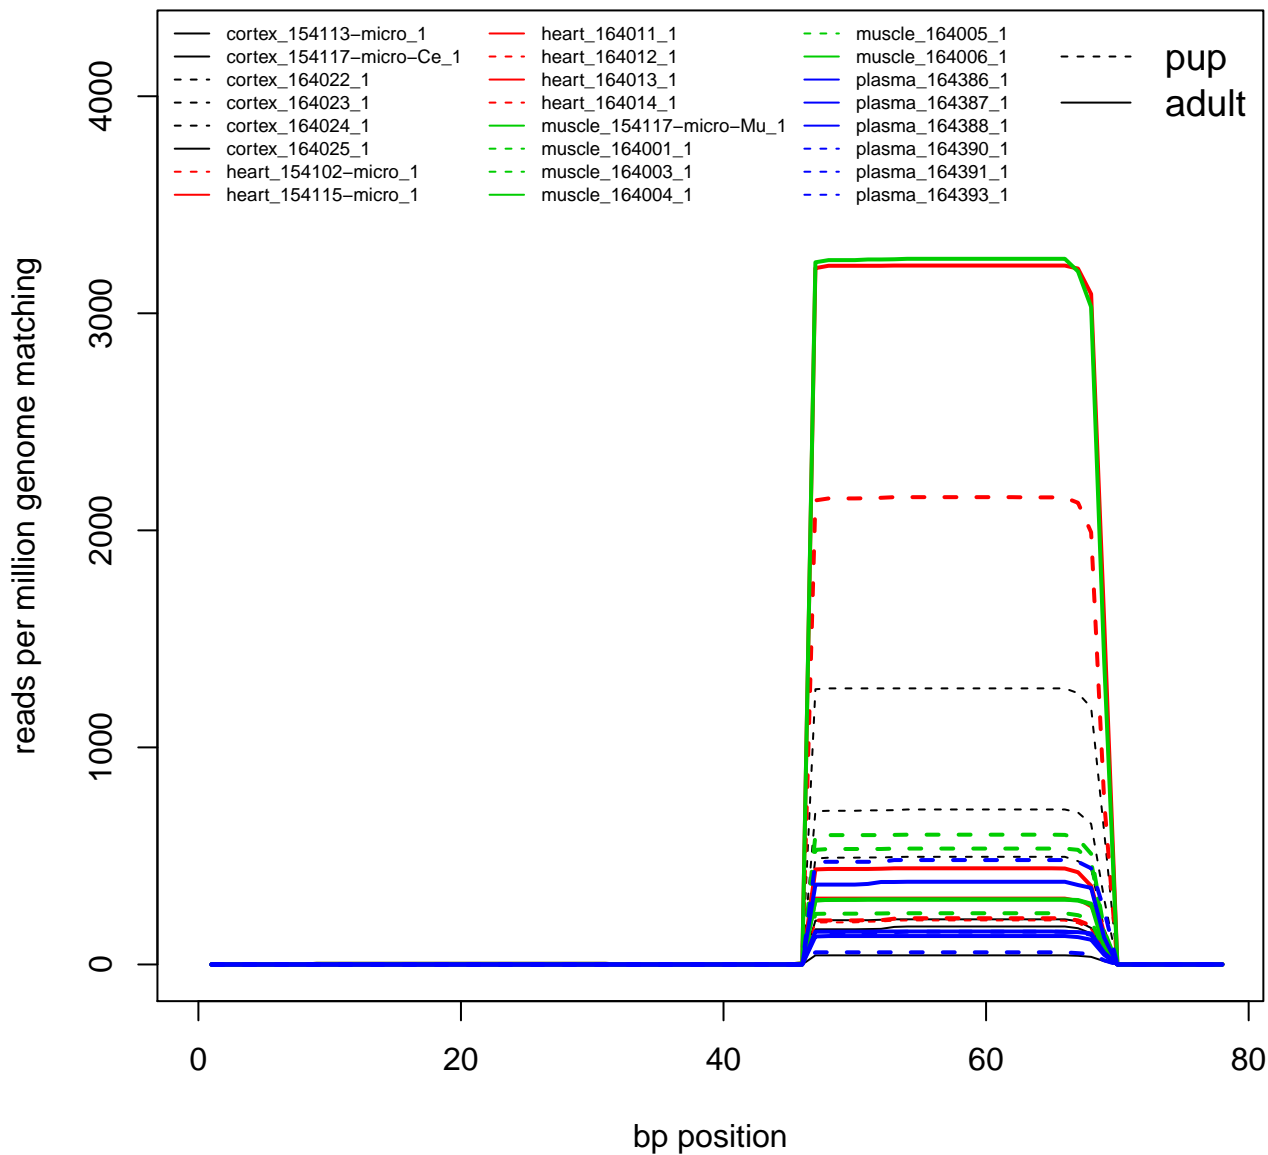

# lwe-miR-20a\_loc1

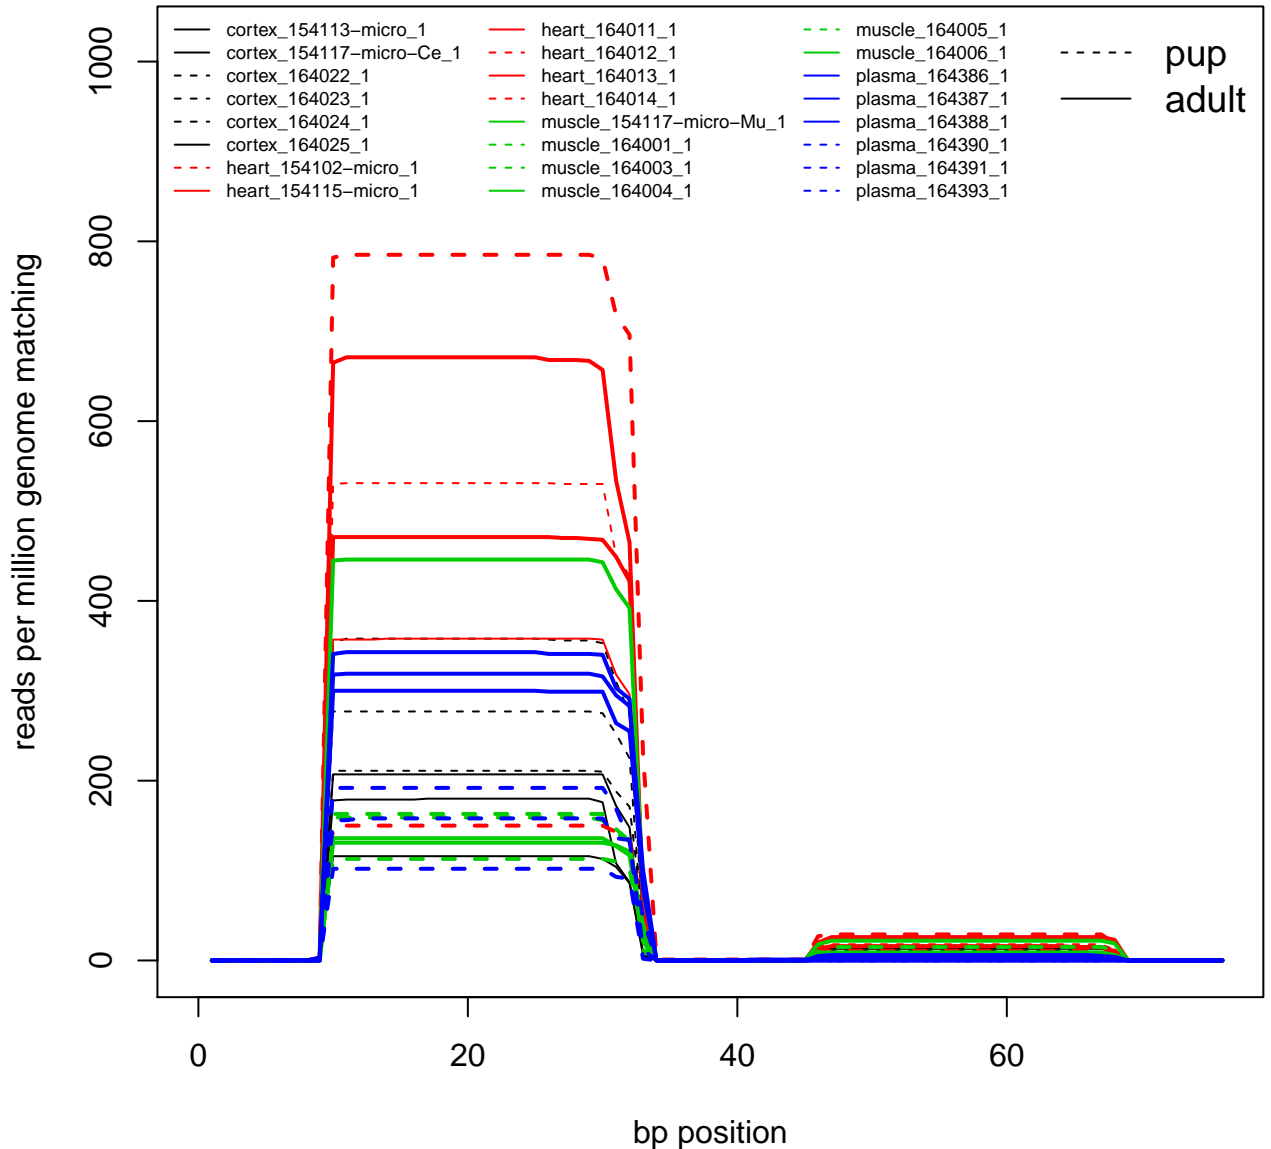

# lwe-miR-19a\_loc1

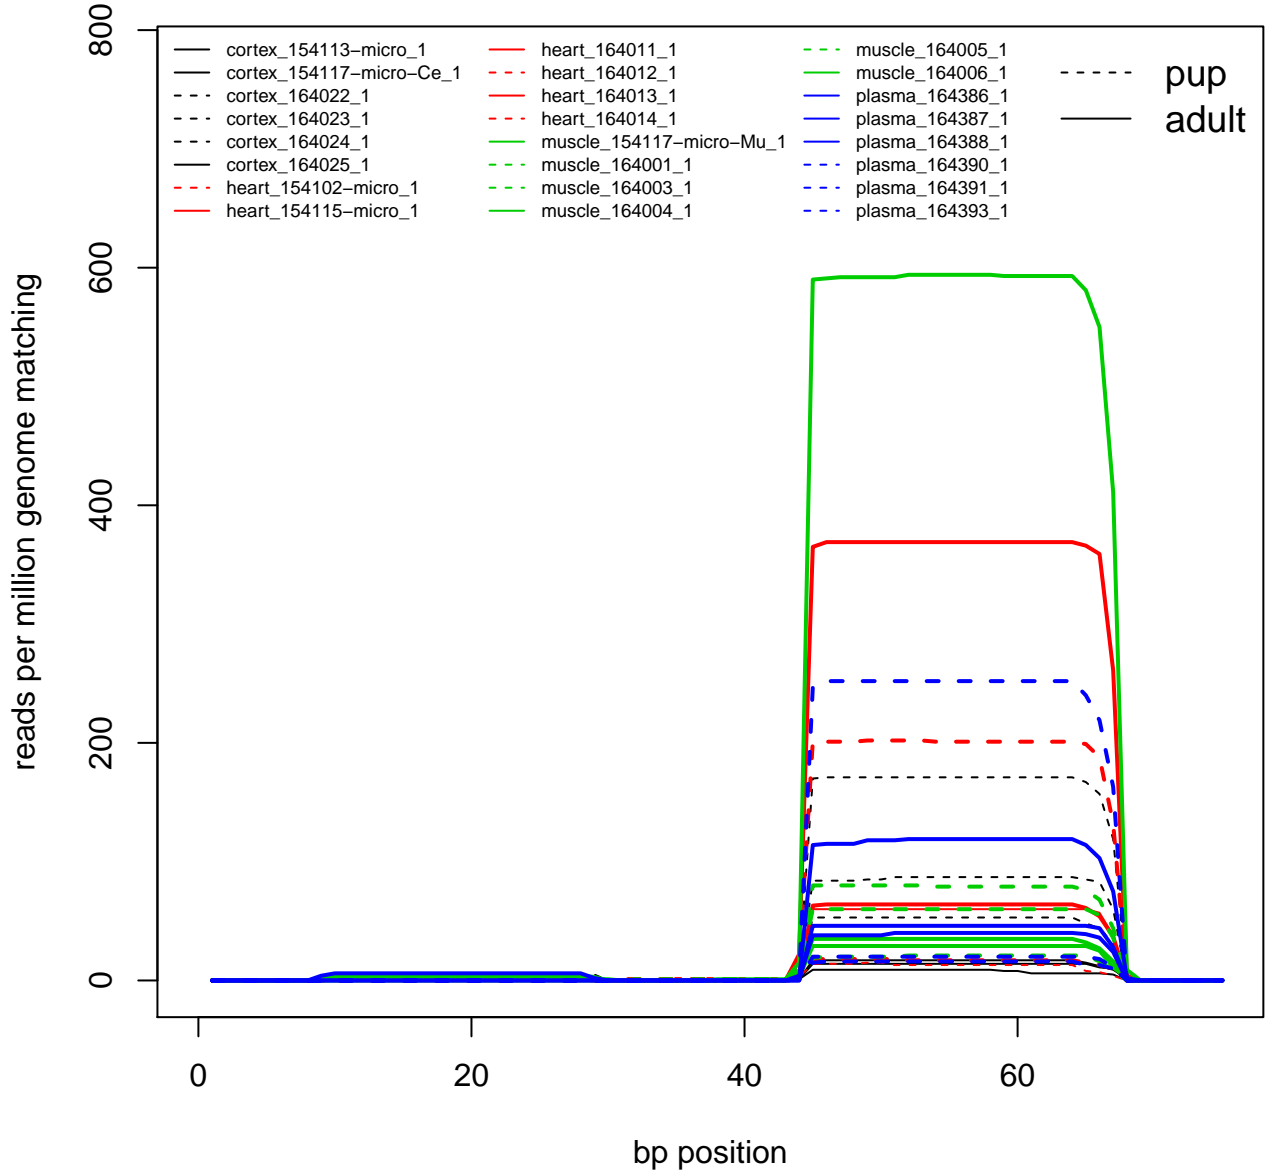

# lwe-miR-17\_loc1

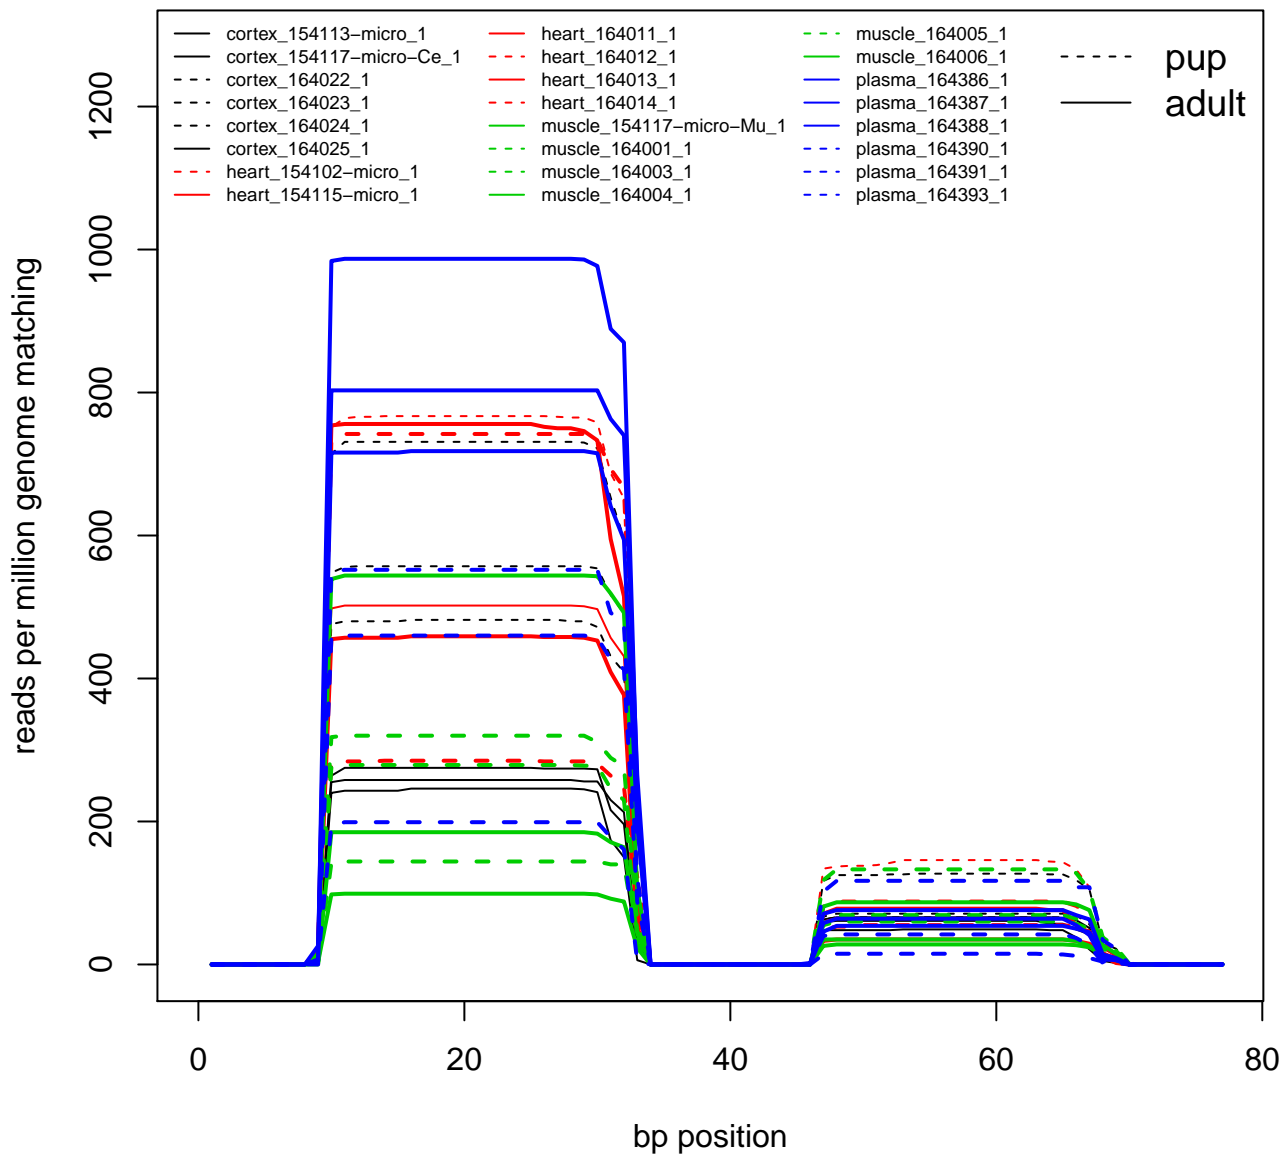

# lwe-miR-384\_loc1

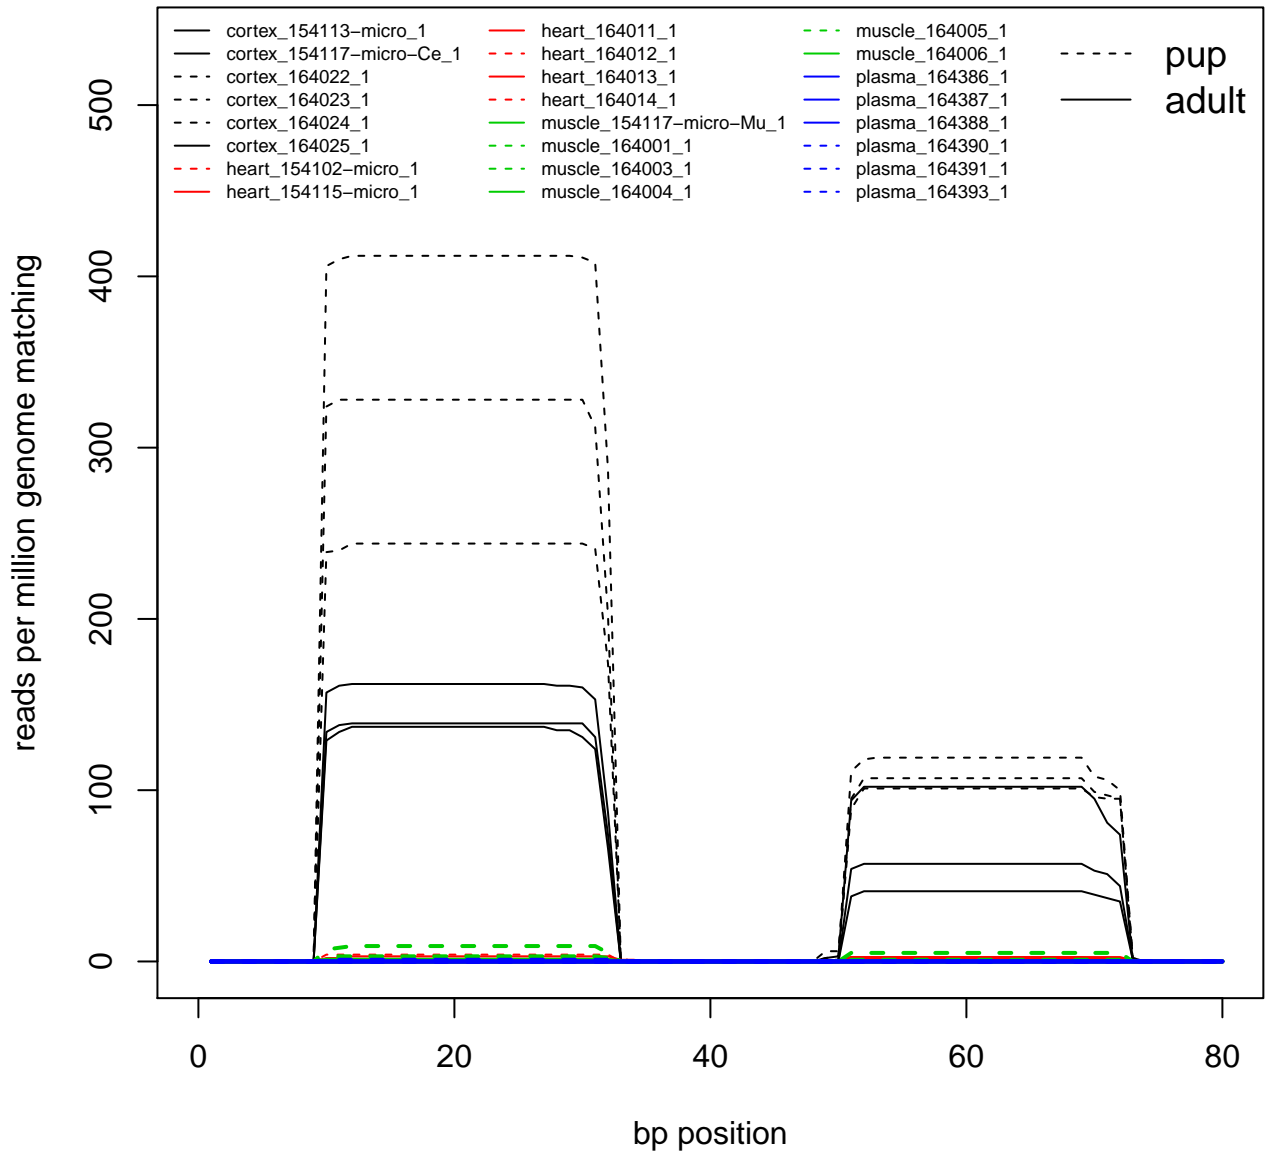

# lwe-miR-325\_loc1

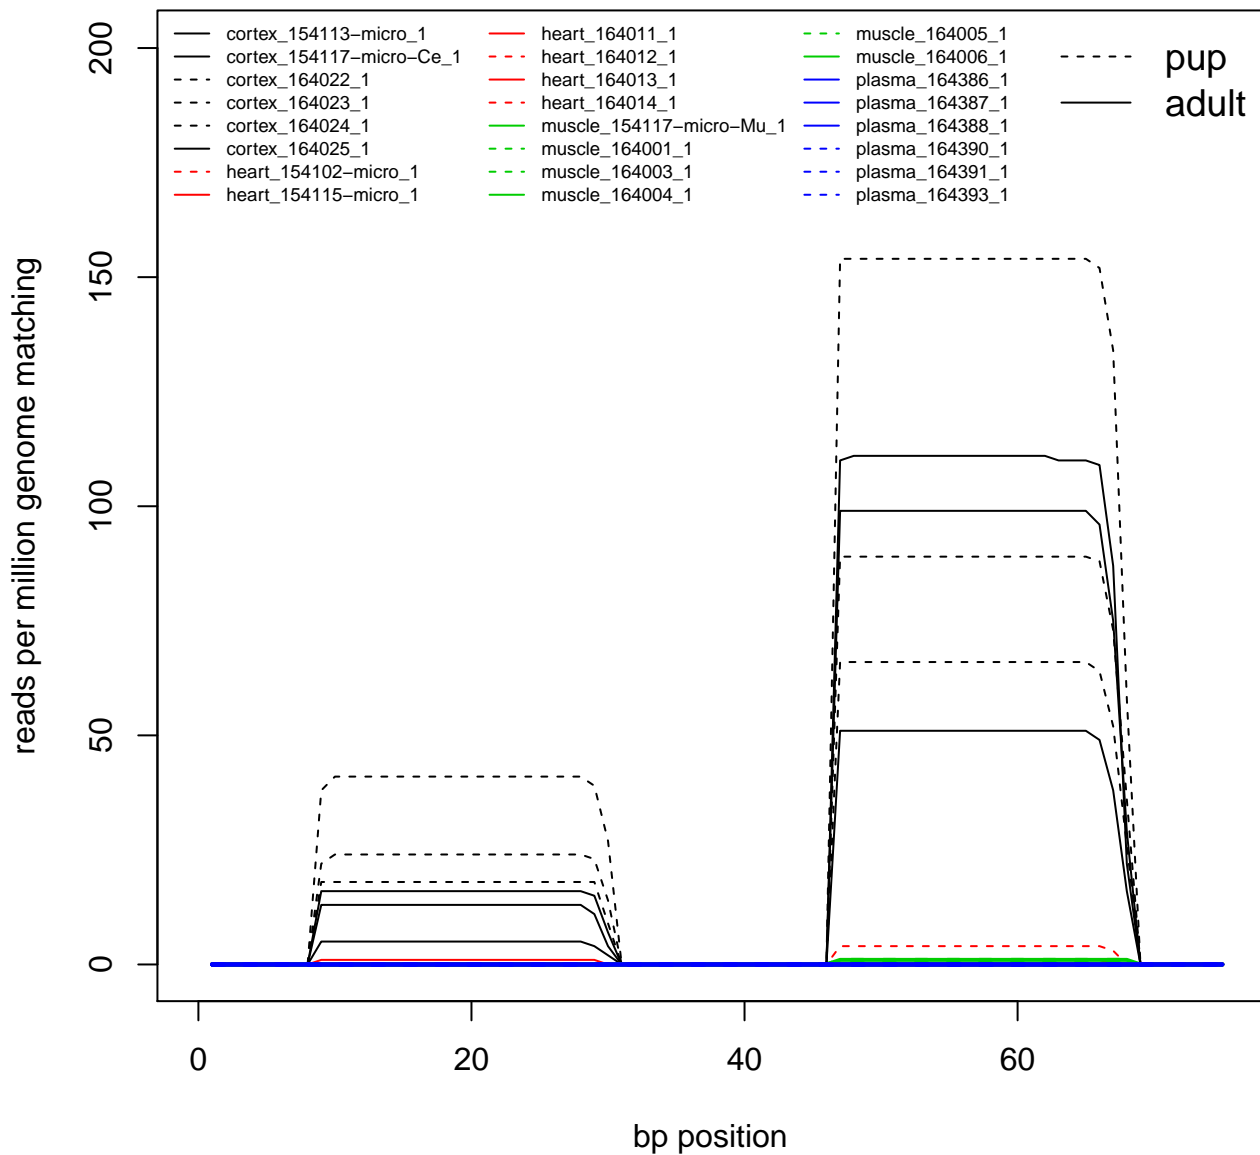

# lwe-miR-3059\_loc1

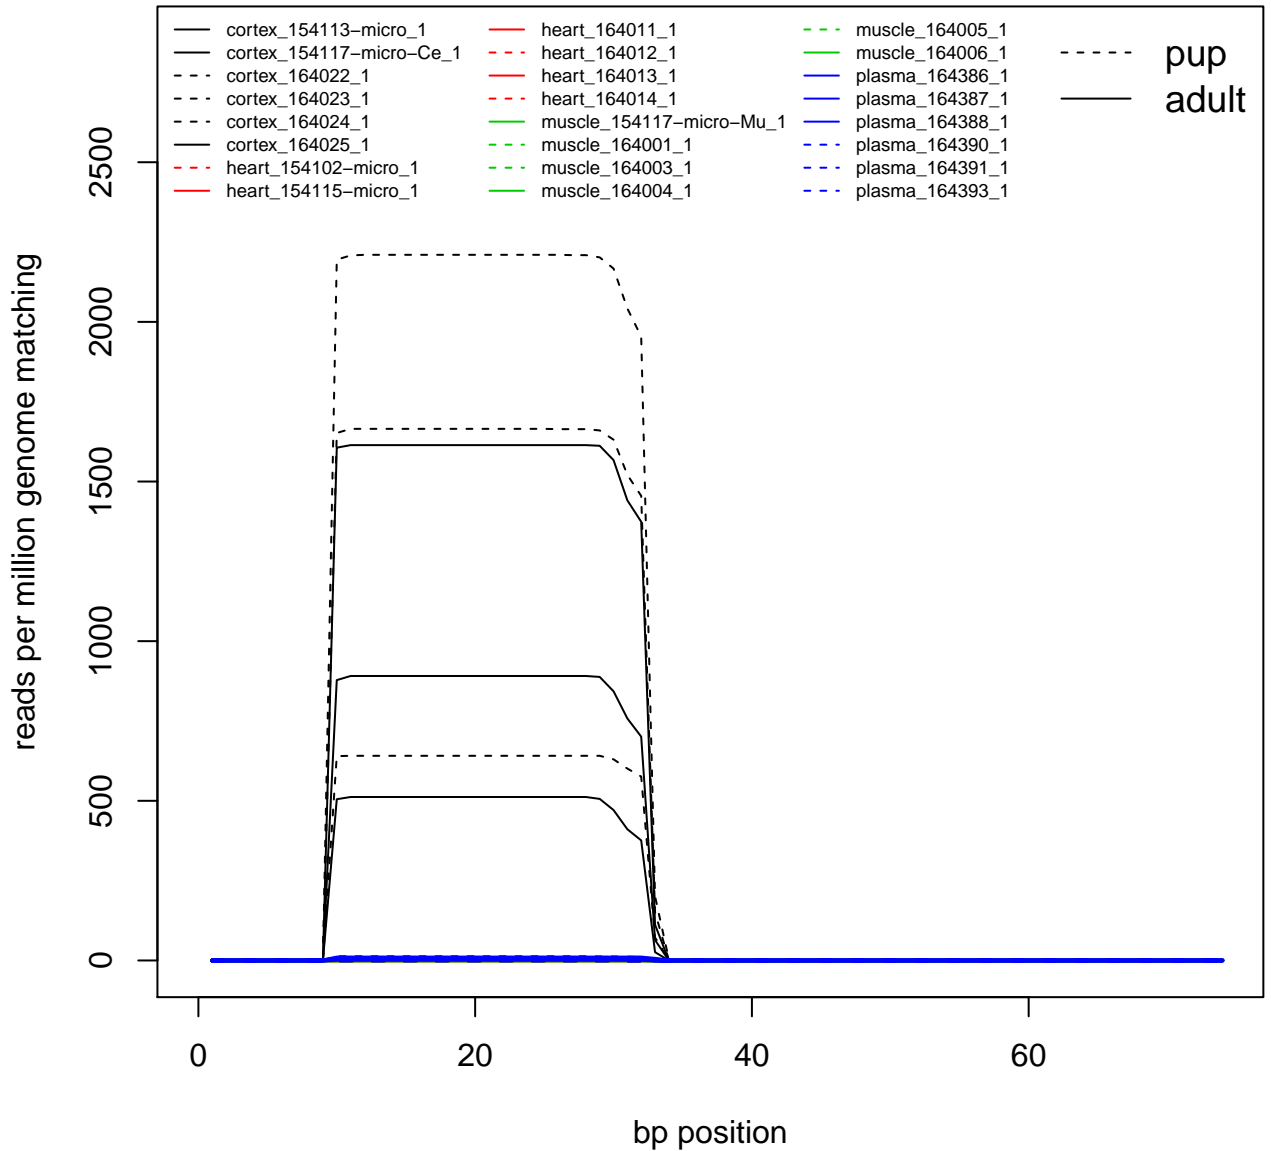



# lwe-miR-873a\_loc1

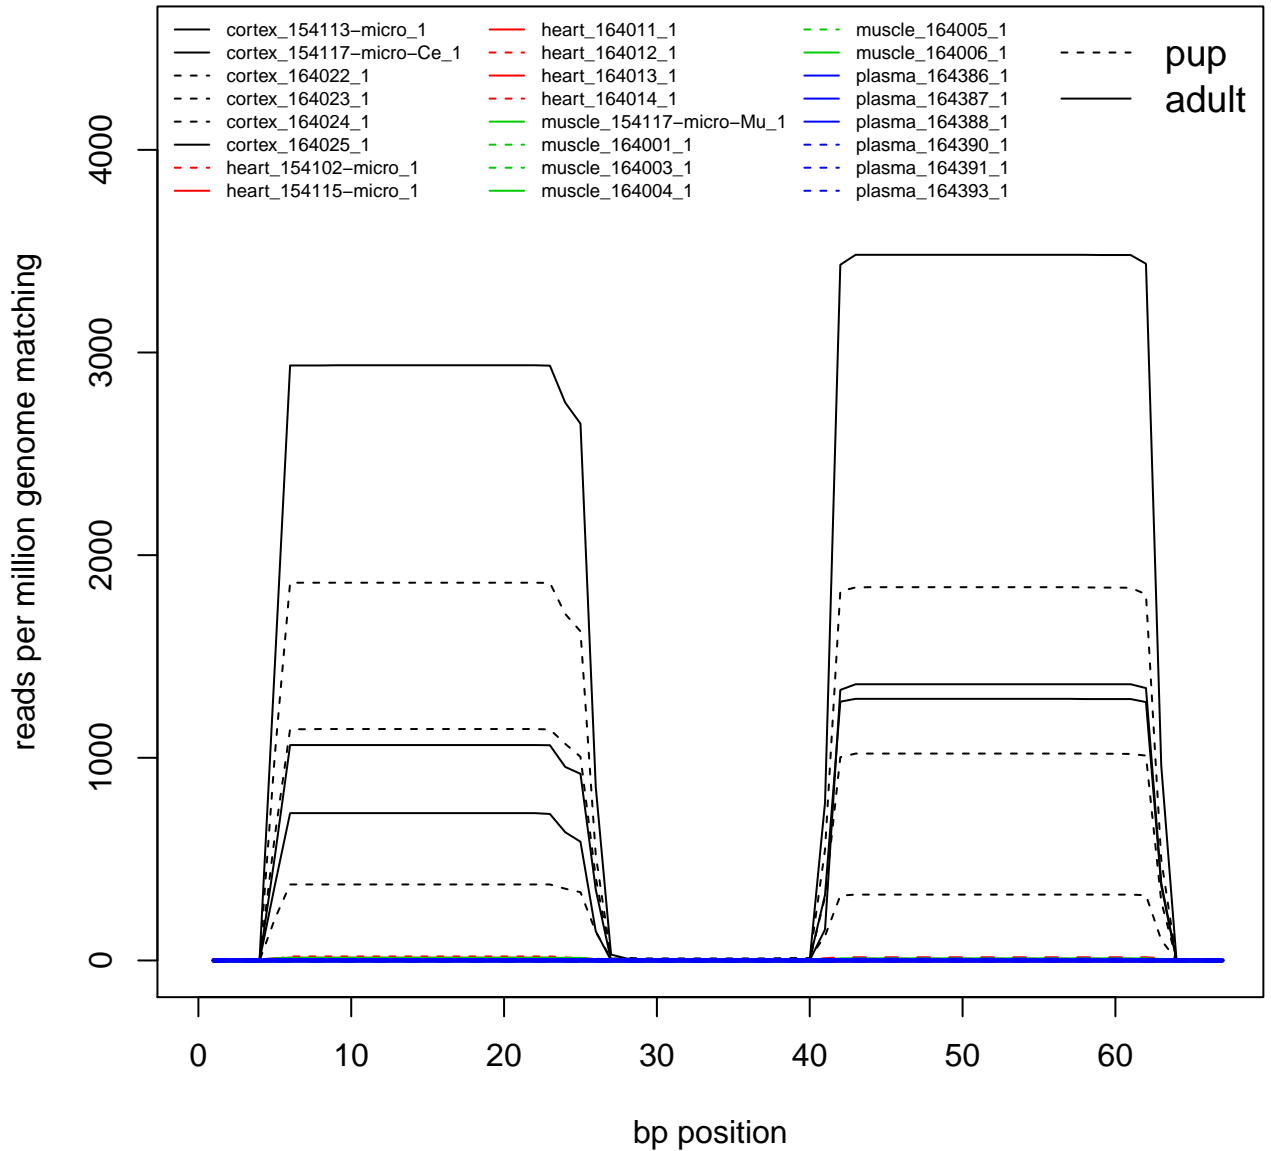

# lwe-miR-876\_loc1

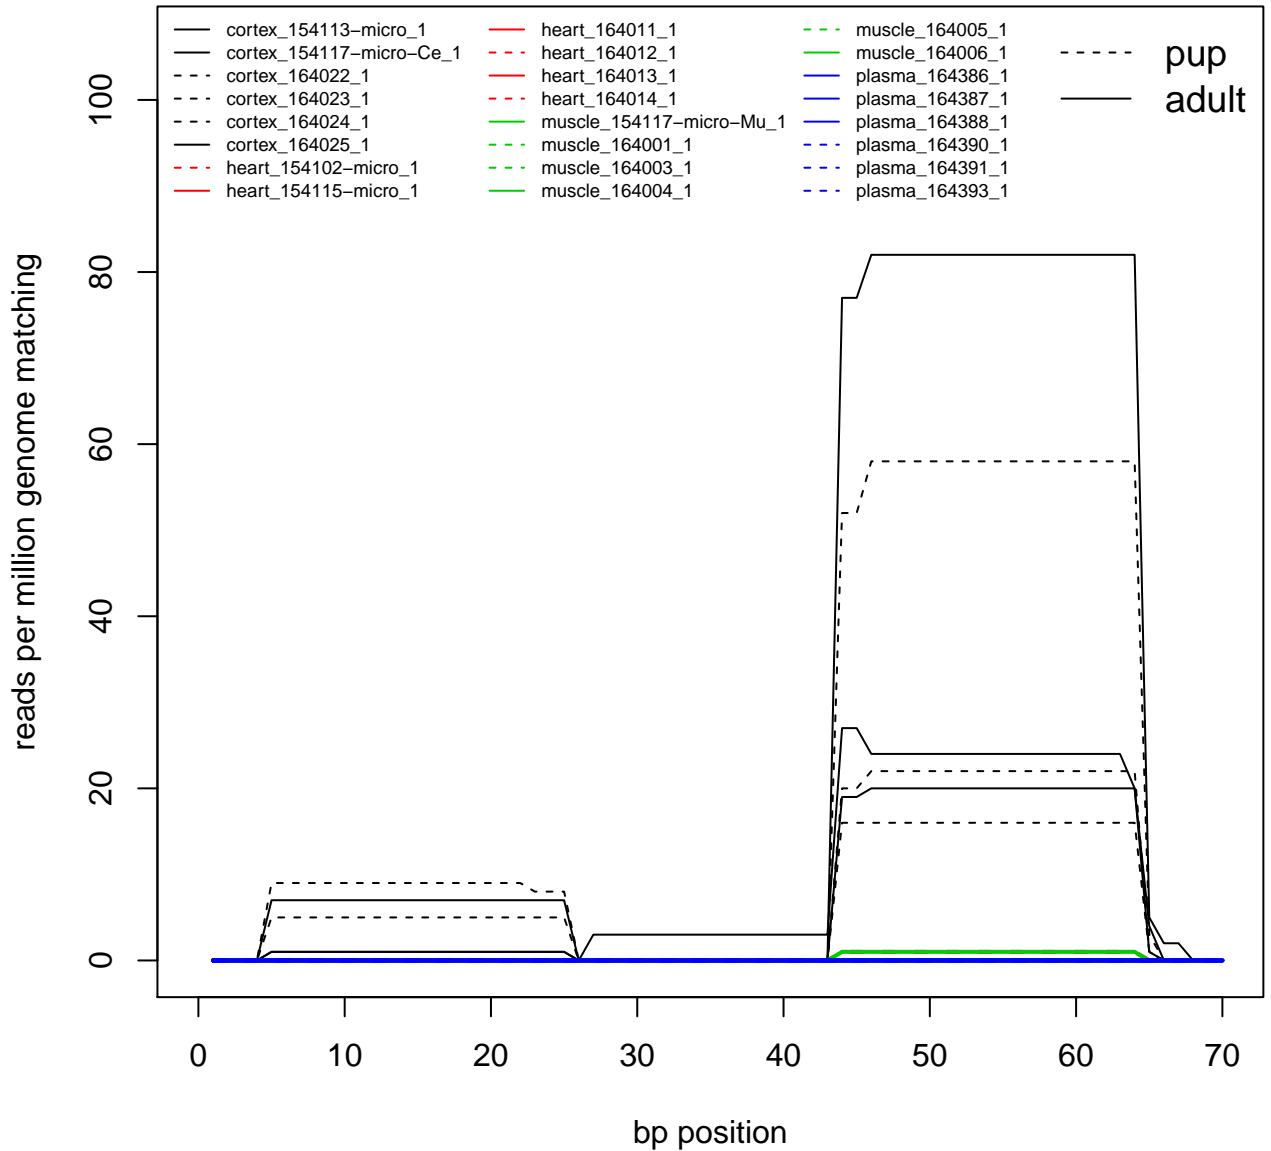

# lwe-miR-2483\_loc1

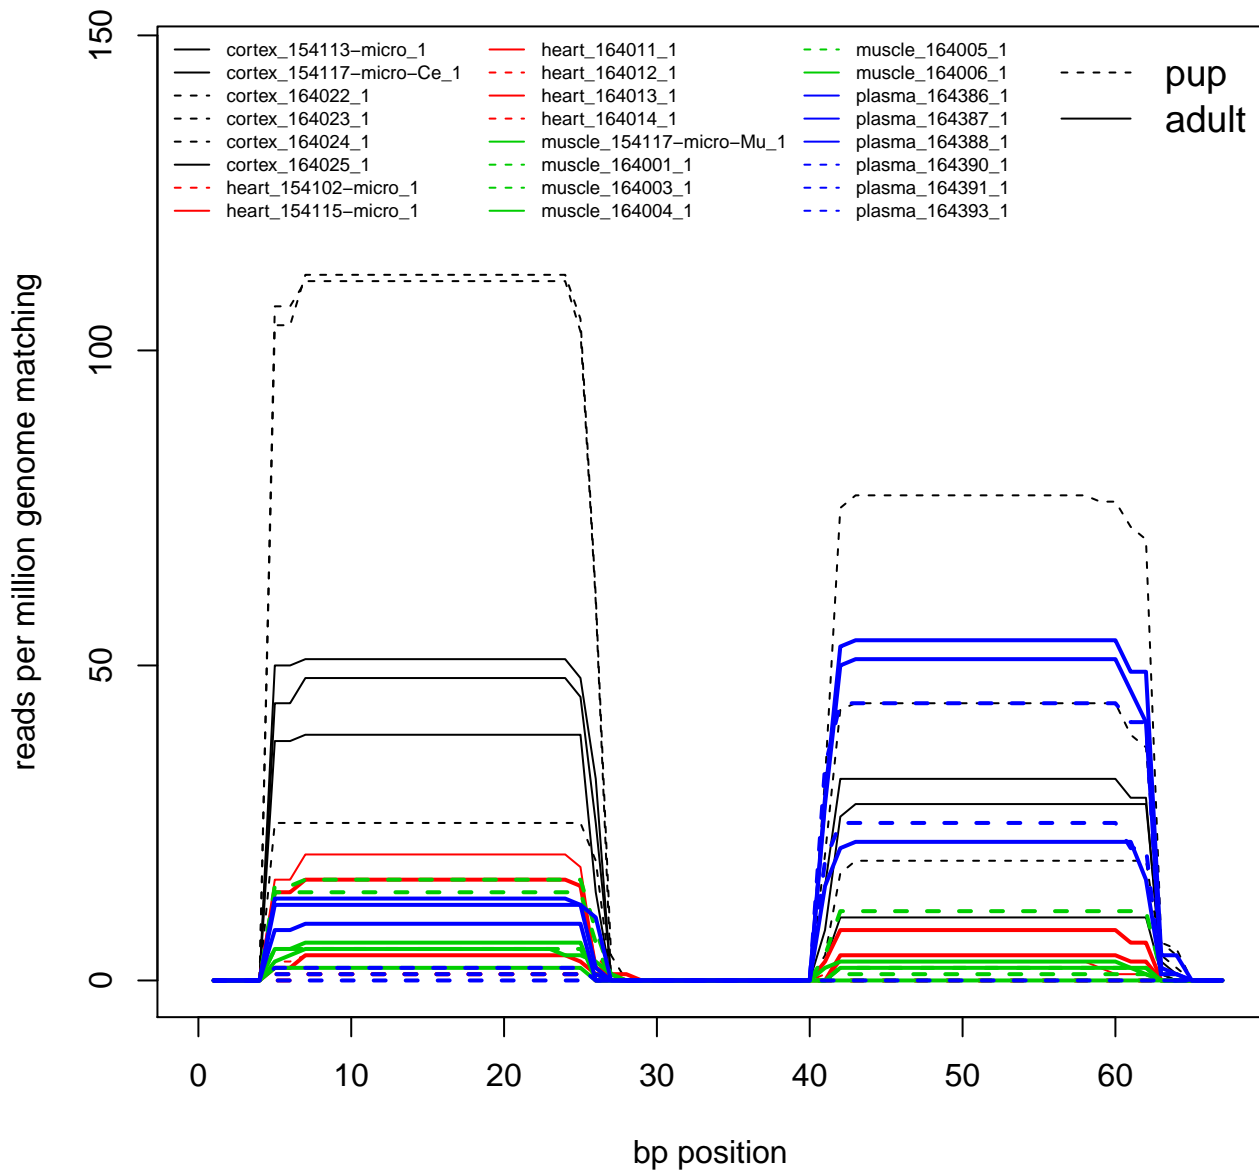

# lwe-miR-383\_loc1

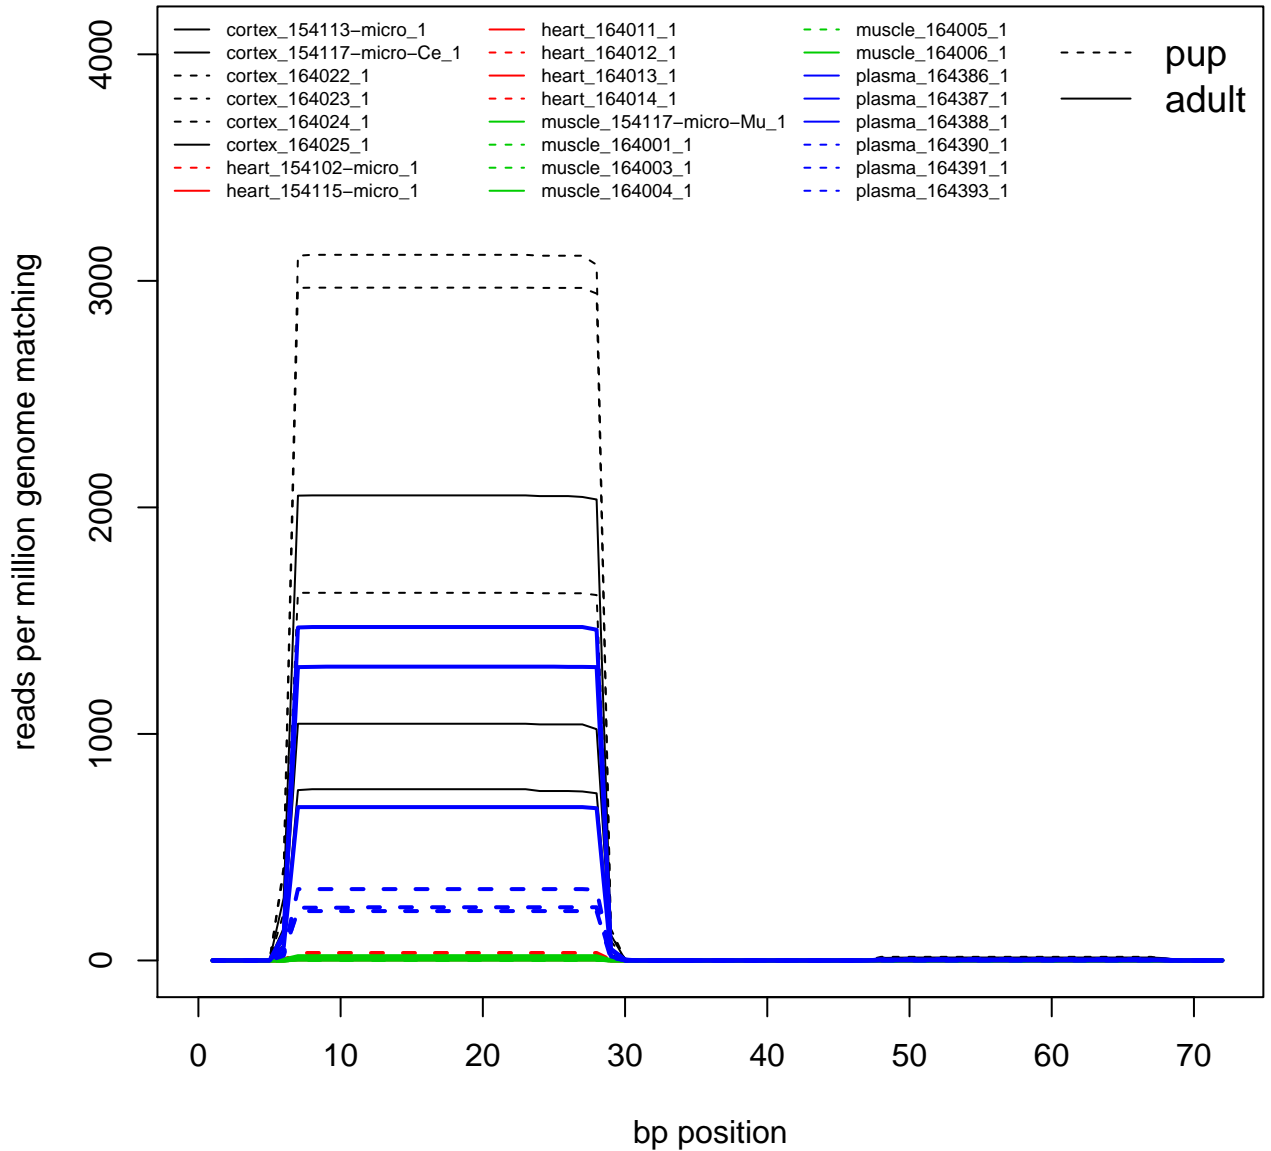

# lwe-miR-499\_loc1

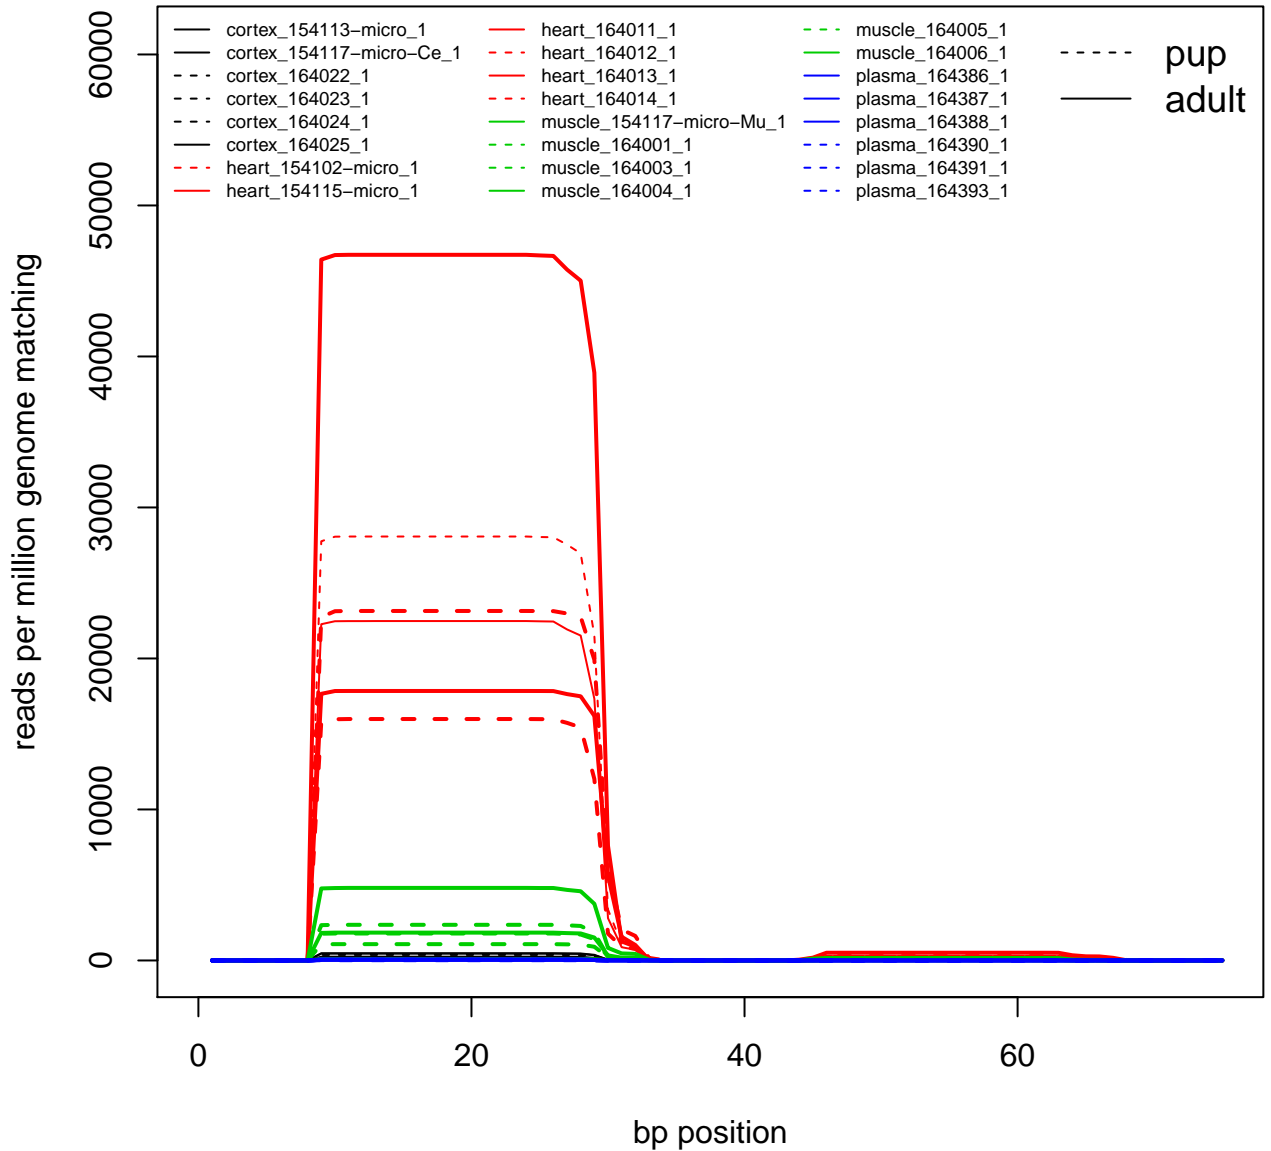

# lwe-miR-9b\_loc1

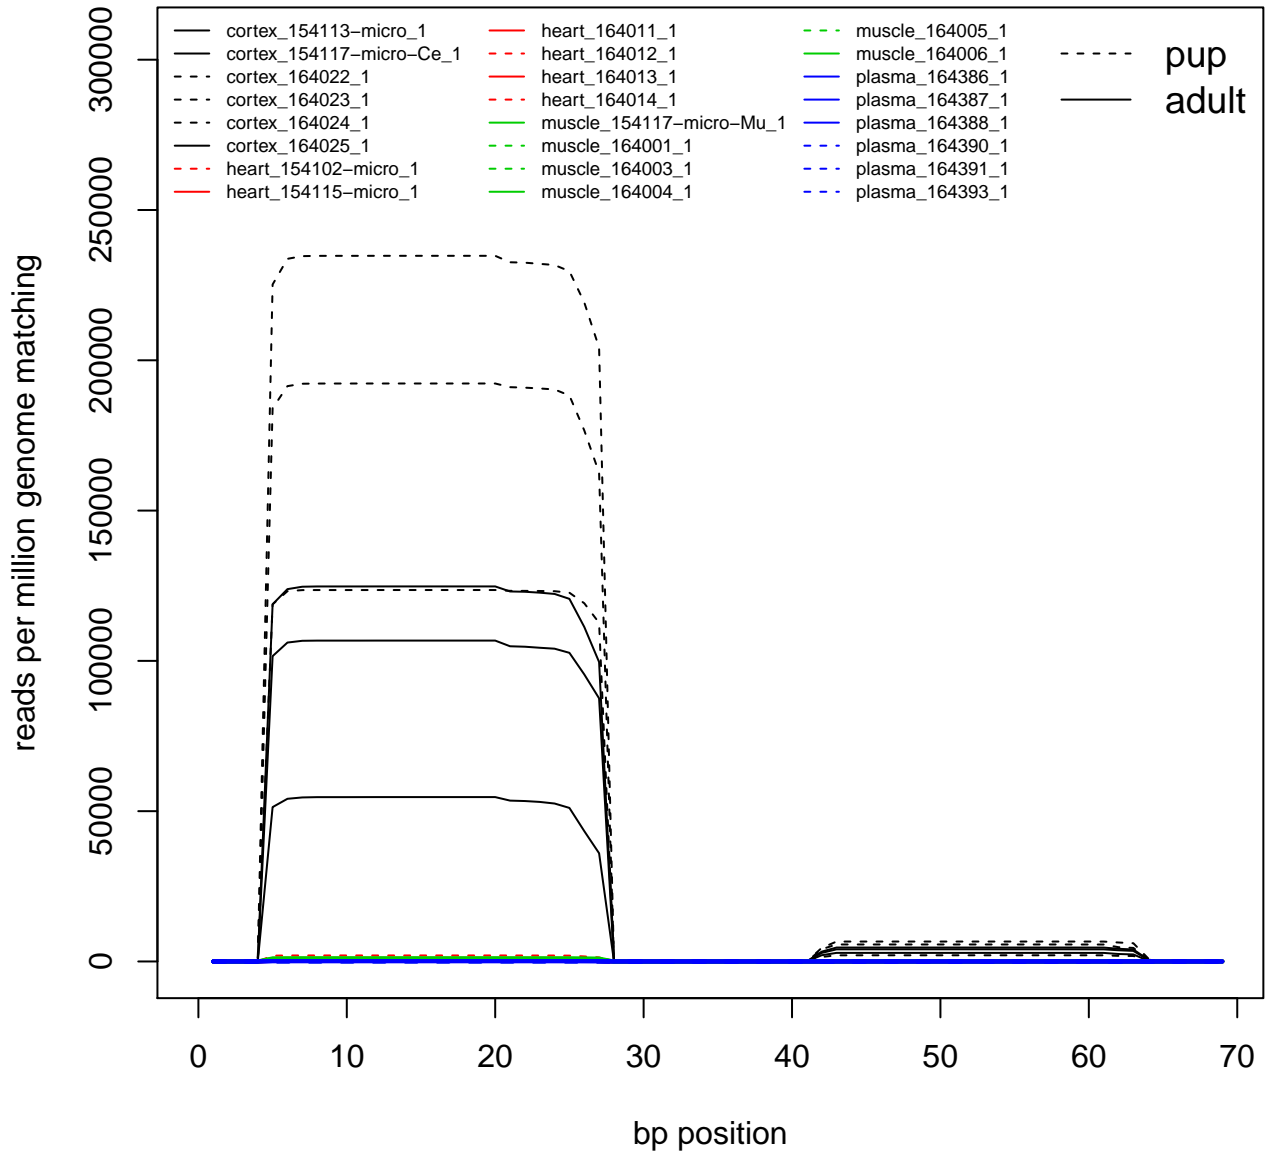

# lwe-miR-137\_loc1

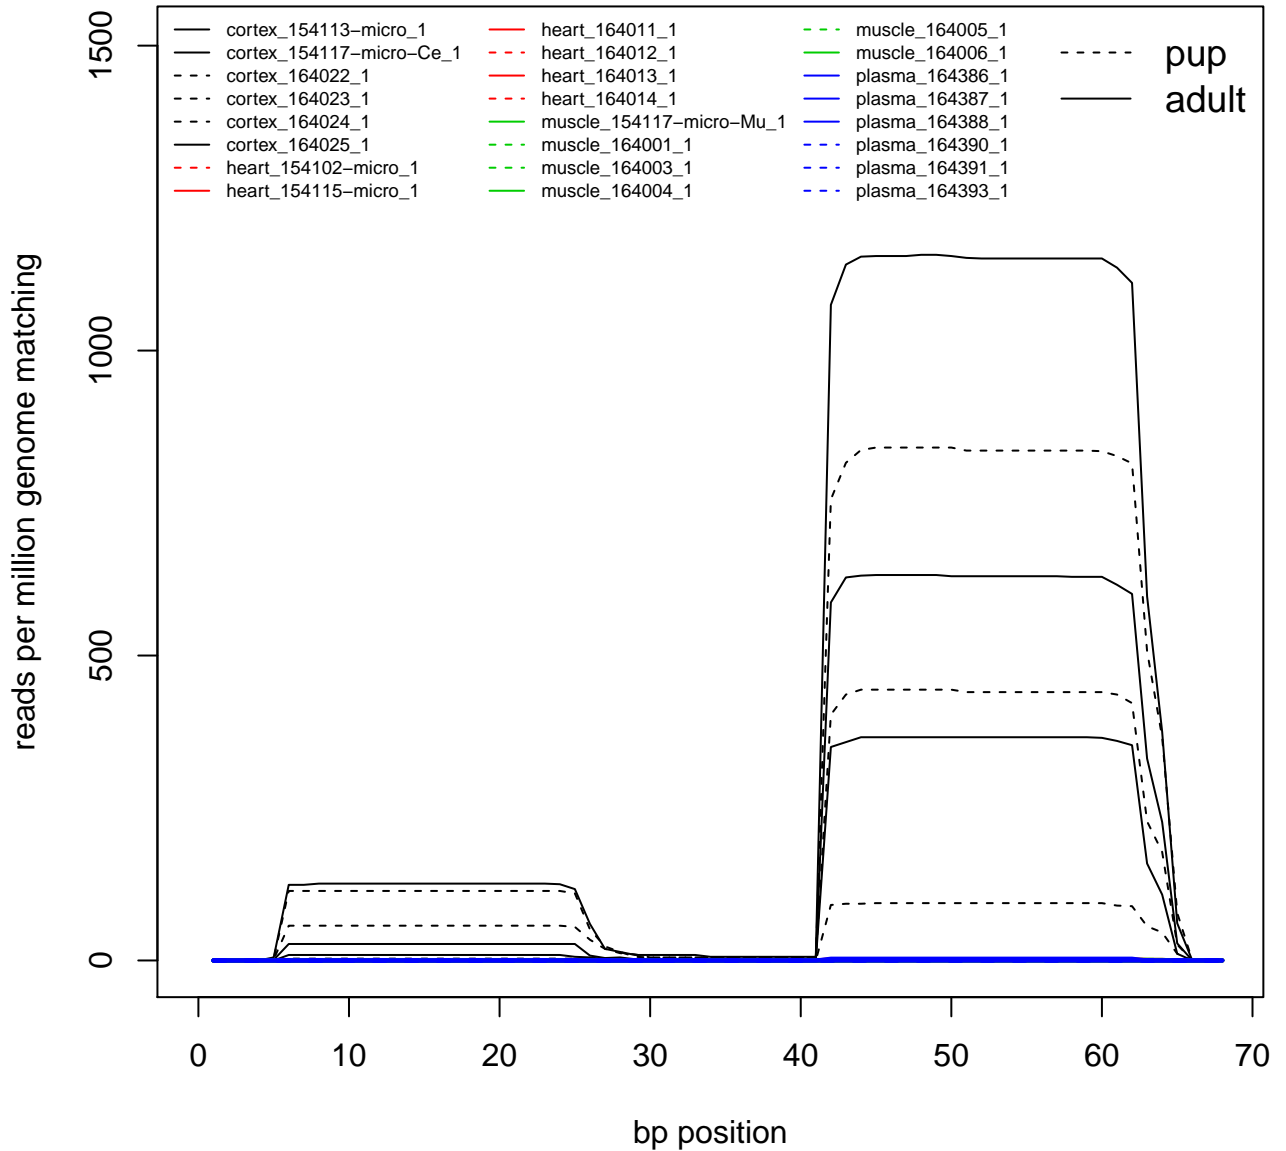

# lwe-miR-186\_loc1

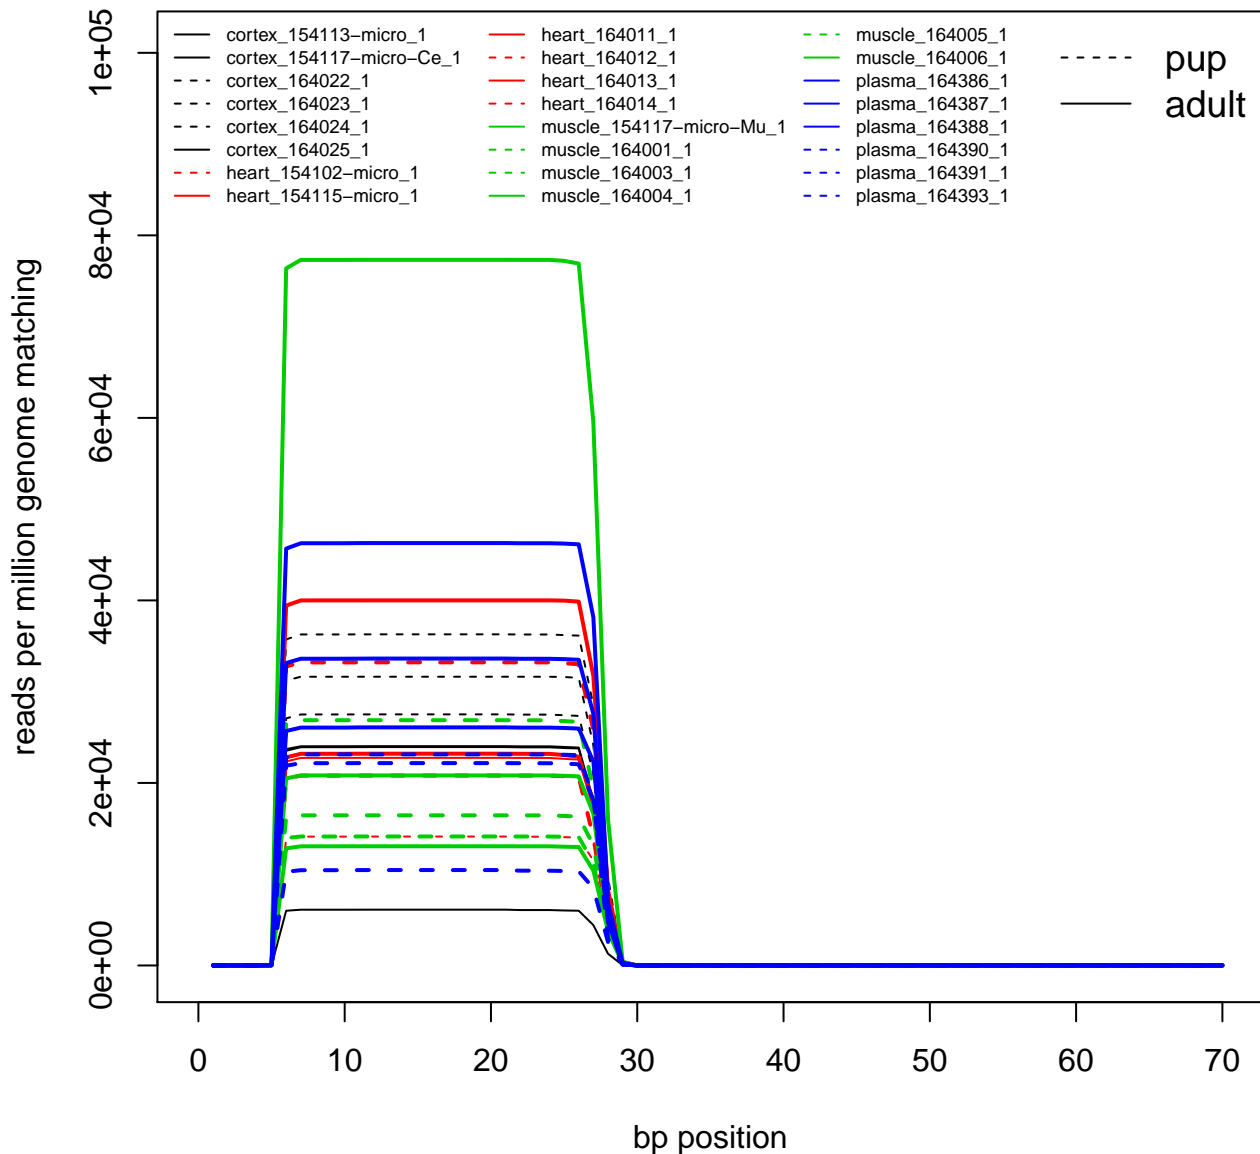



# lwe-miR-361\_loc1

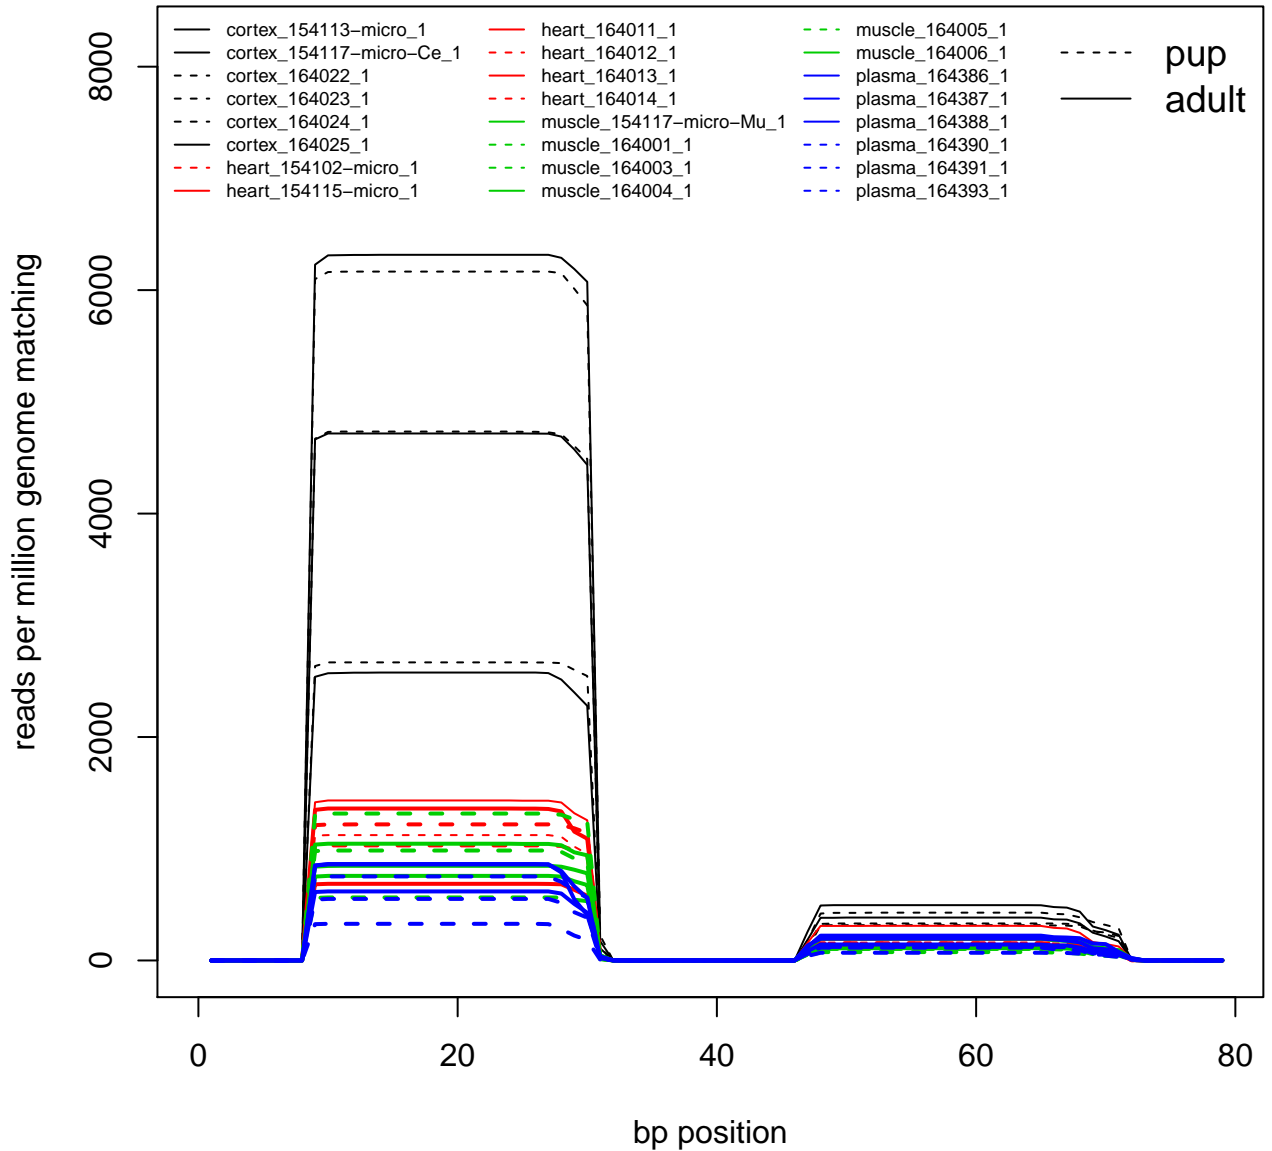

# lwe-miR-582\_loc1

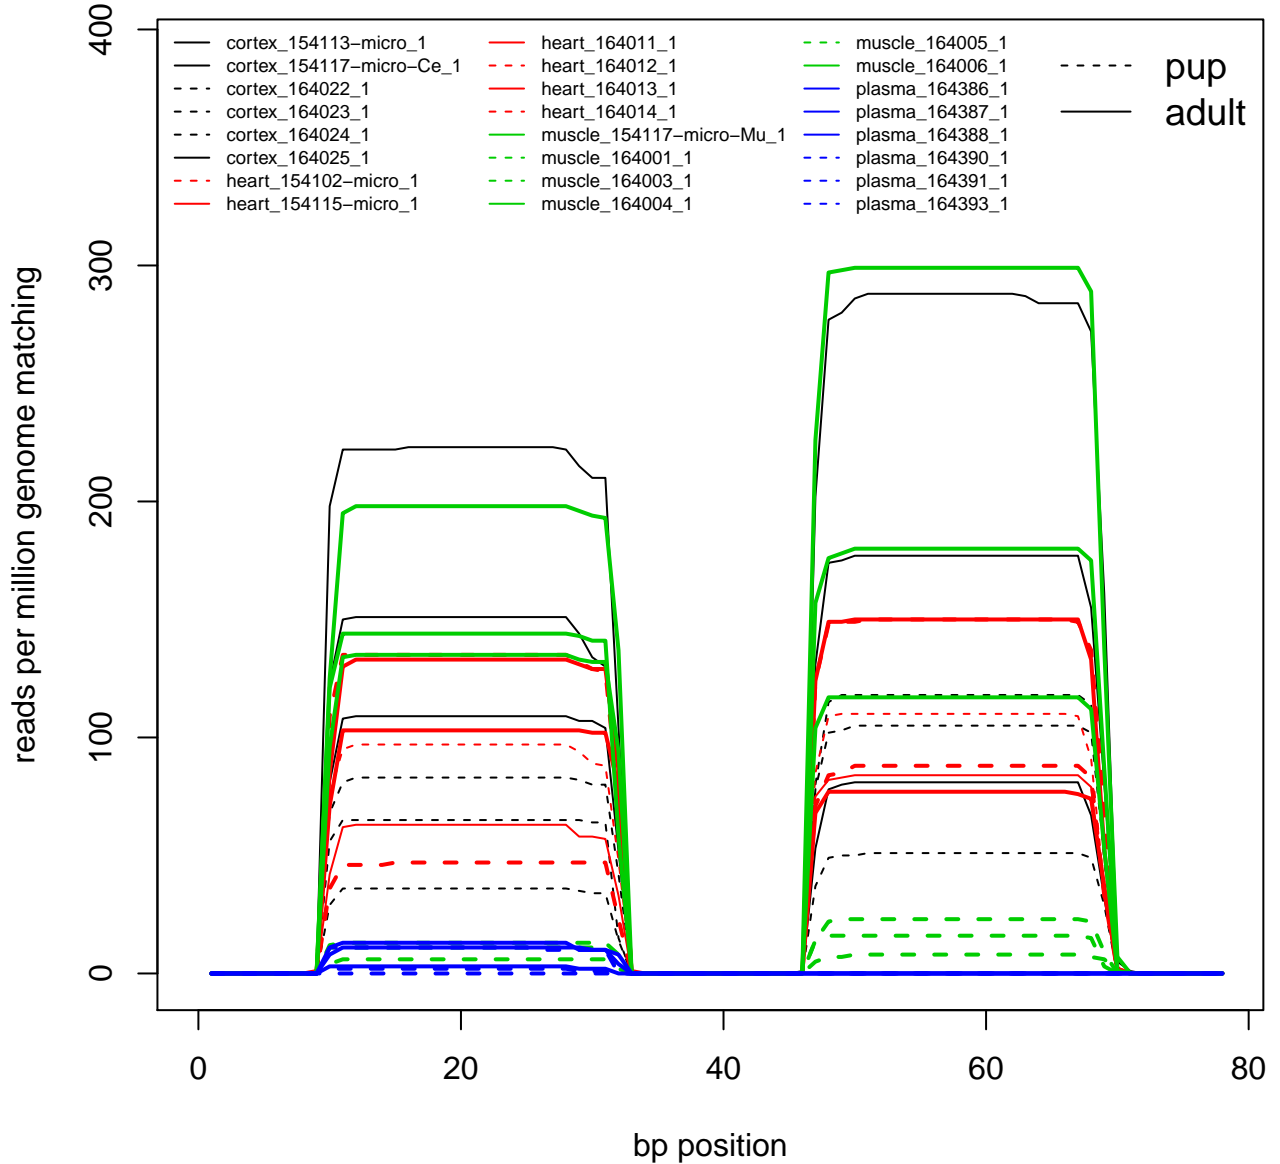

# novel\_1

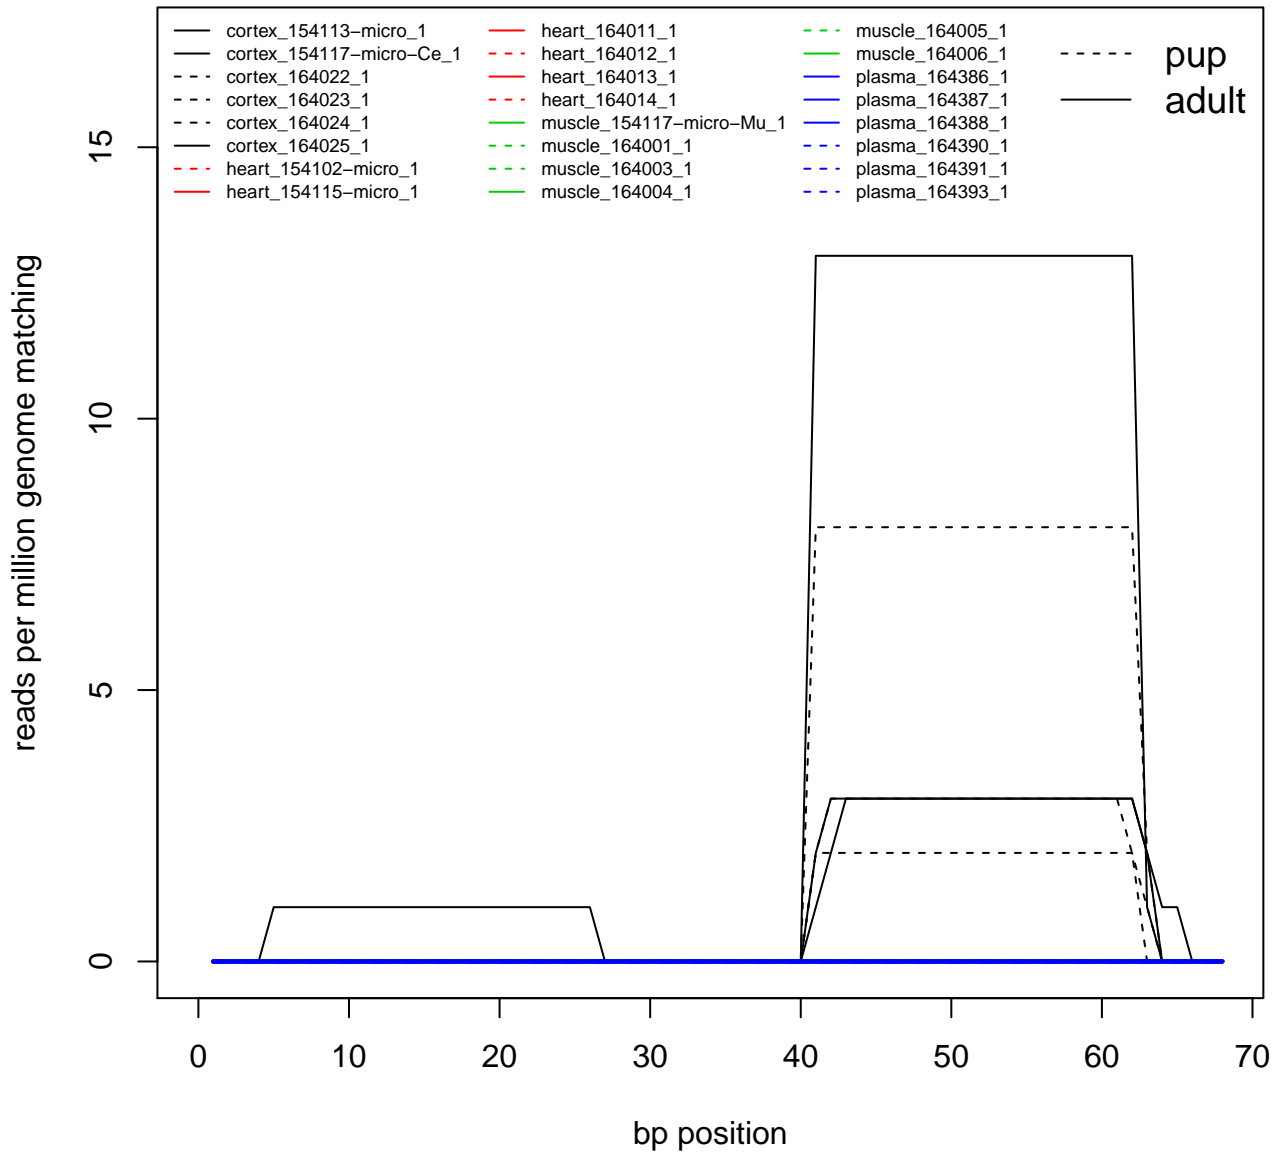

# lwe-miR-448\_loc1

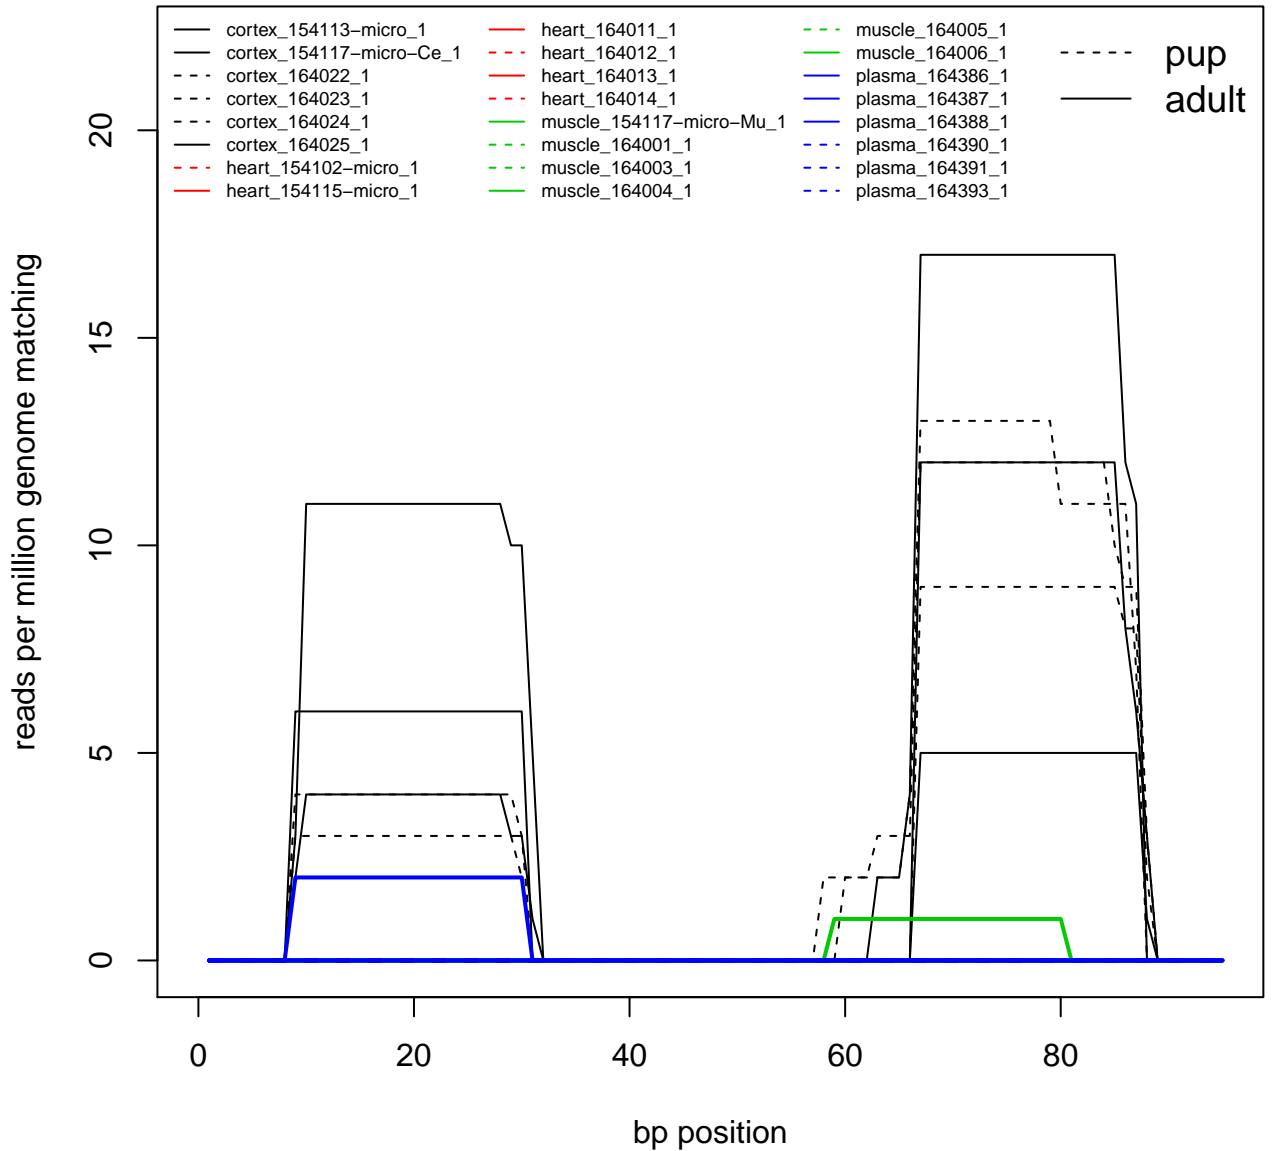

# lwe-miR-1911\_loc1

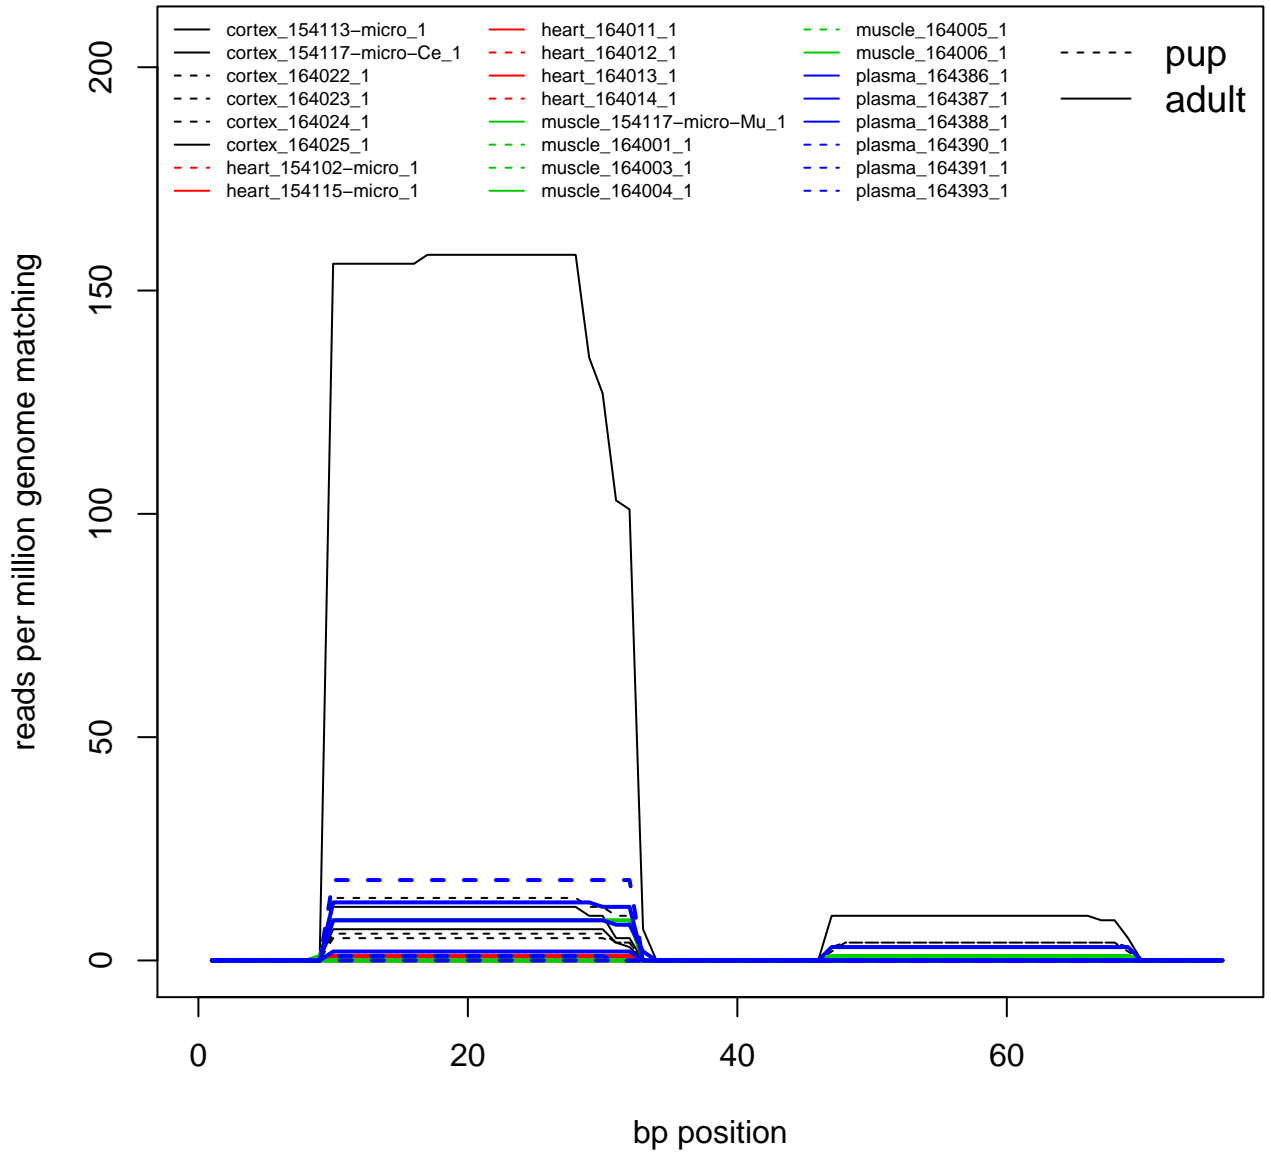

# lwe-miR-1298\_loc1

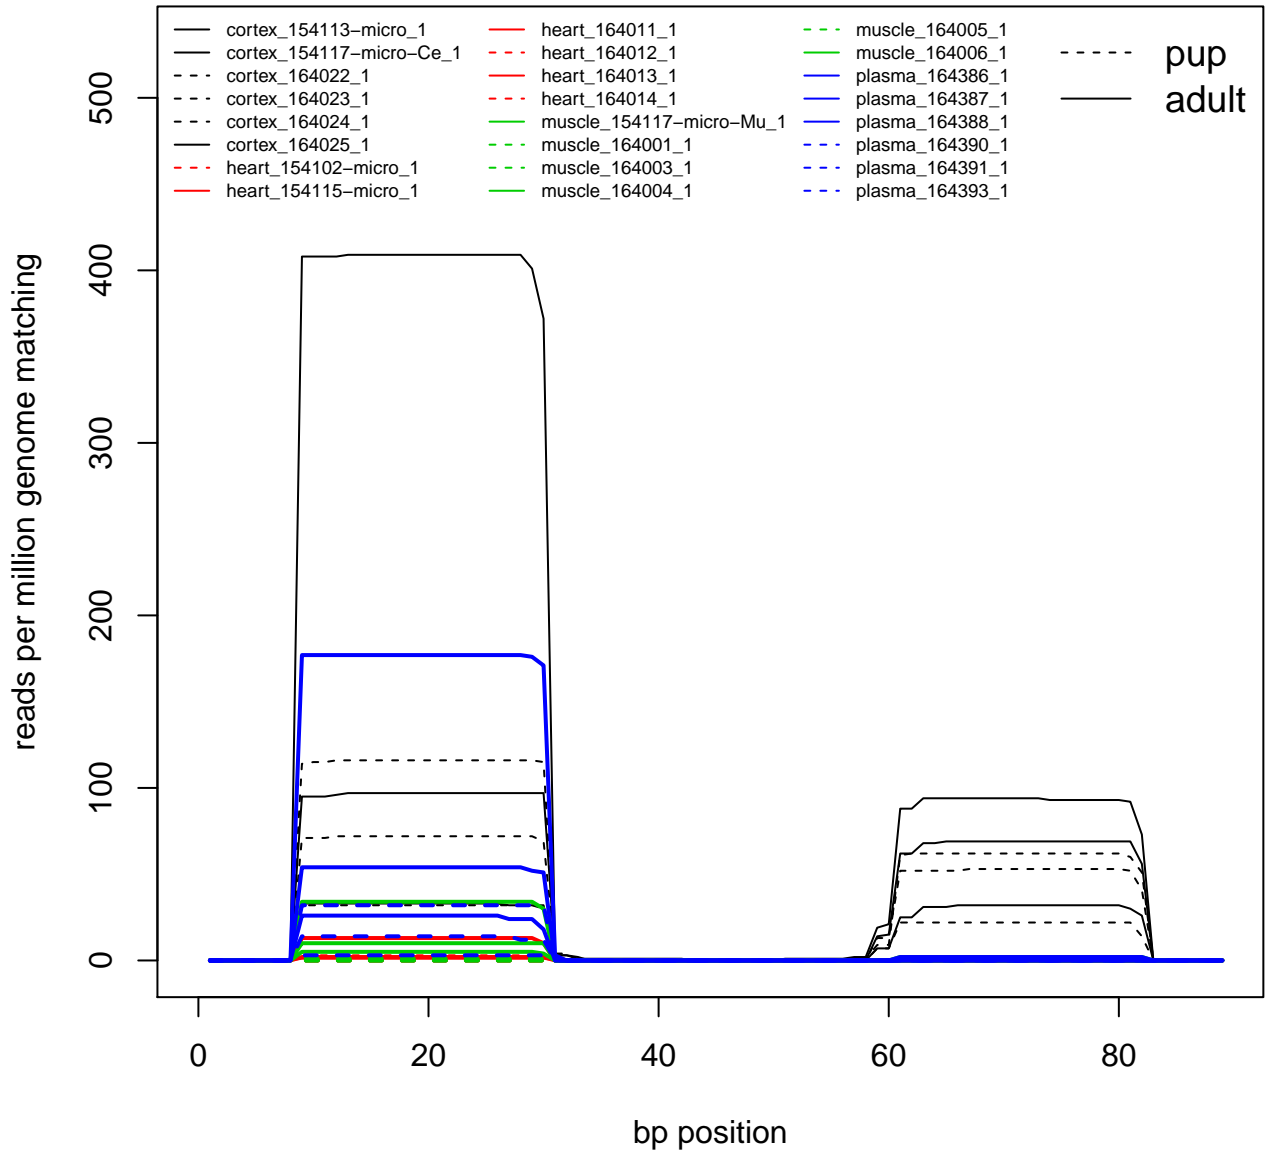

# lwe-miR-1264\_loc1

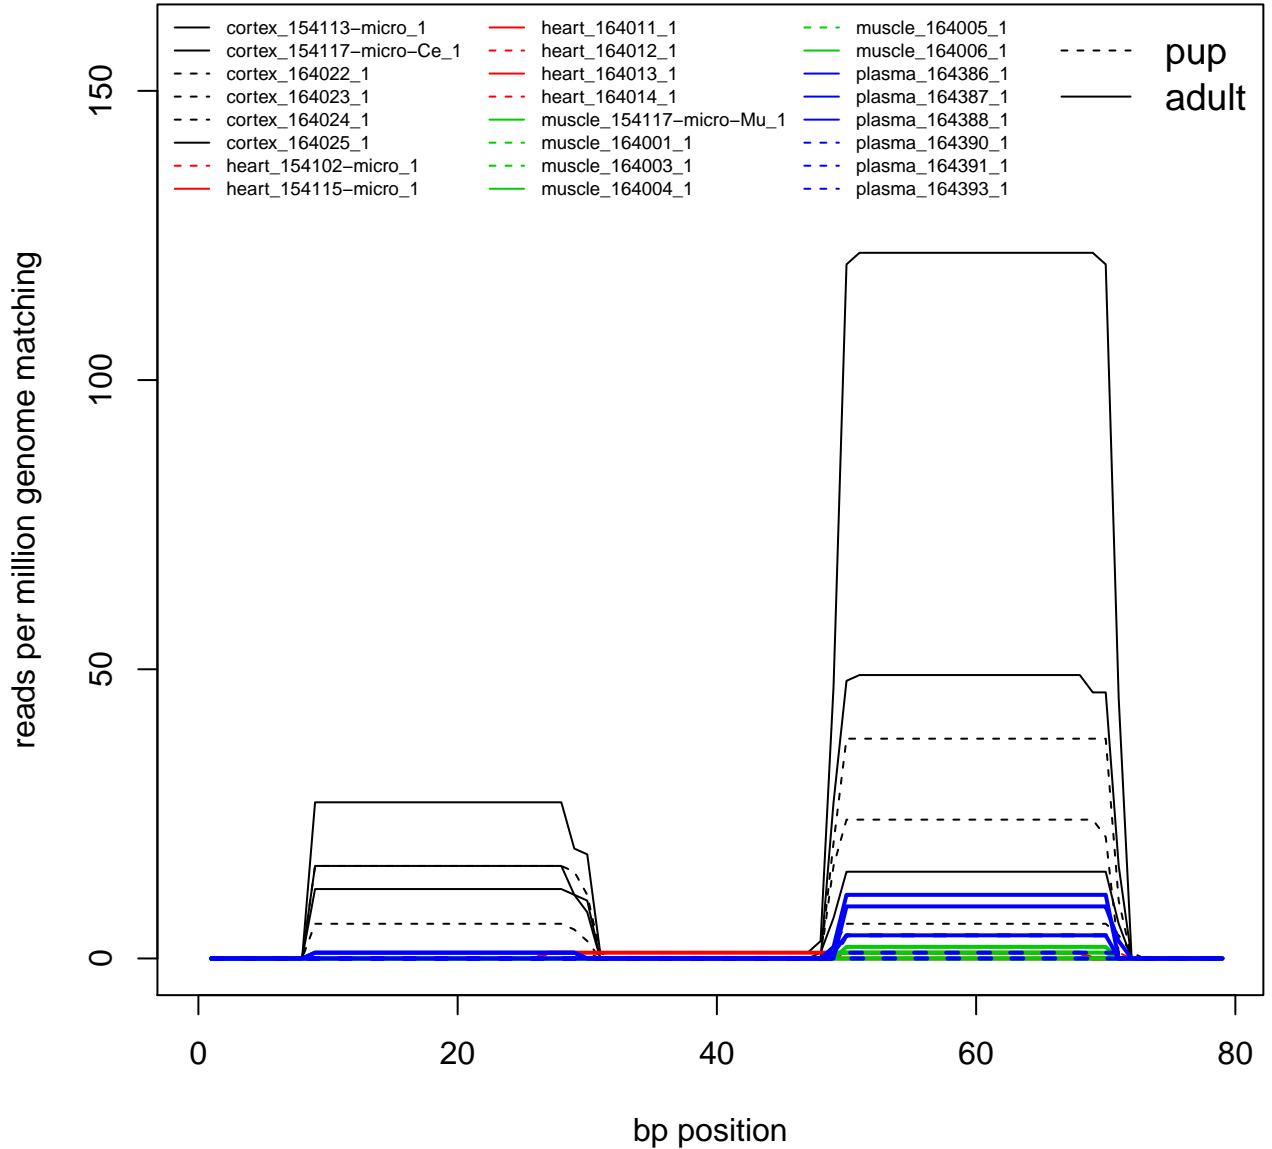

# lwe-miR-1912\_loc1

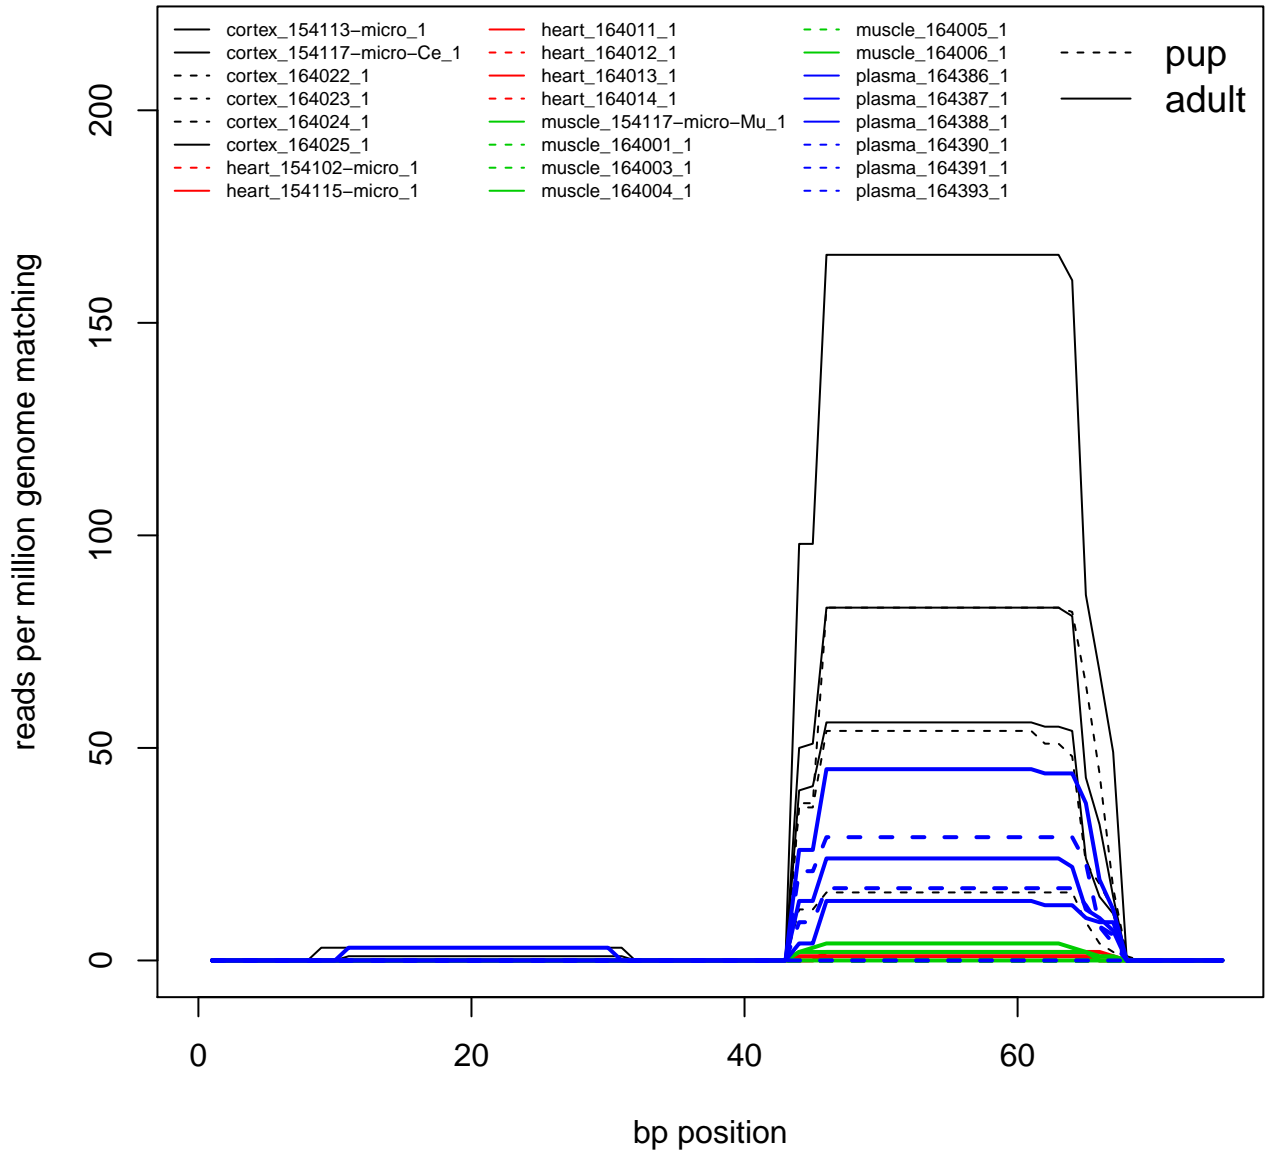





# novel\_2

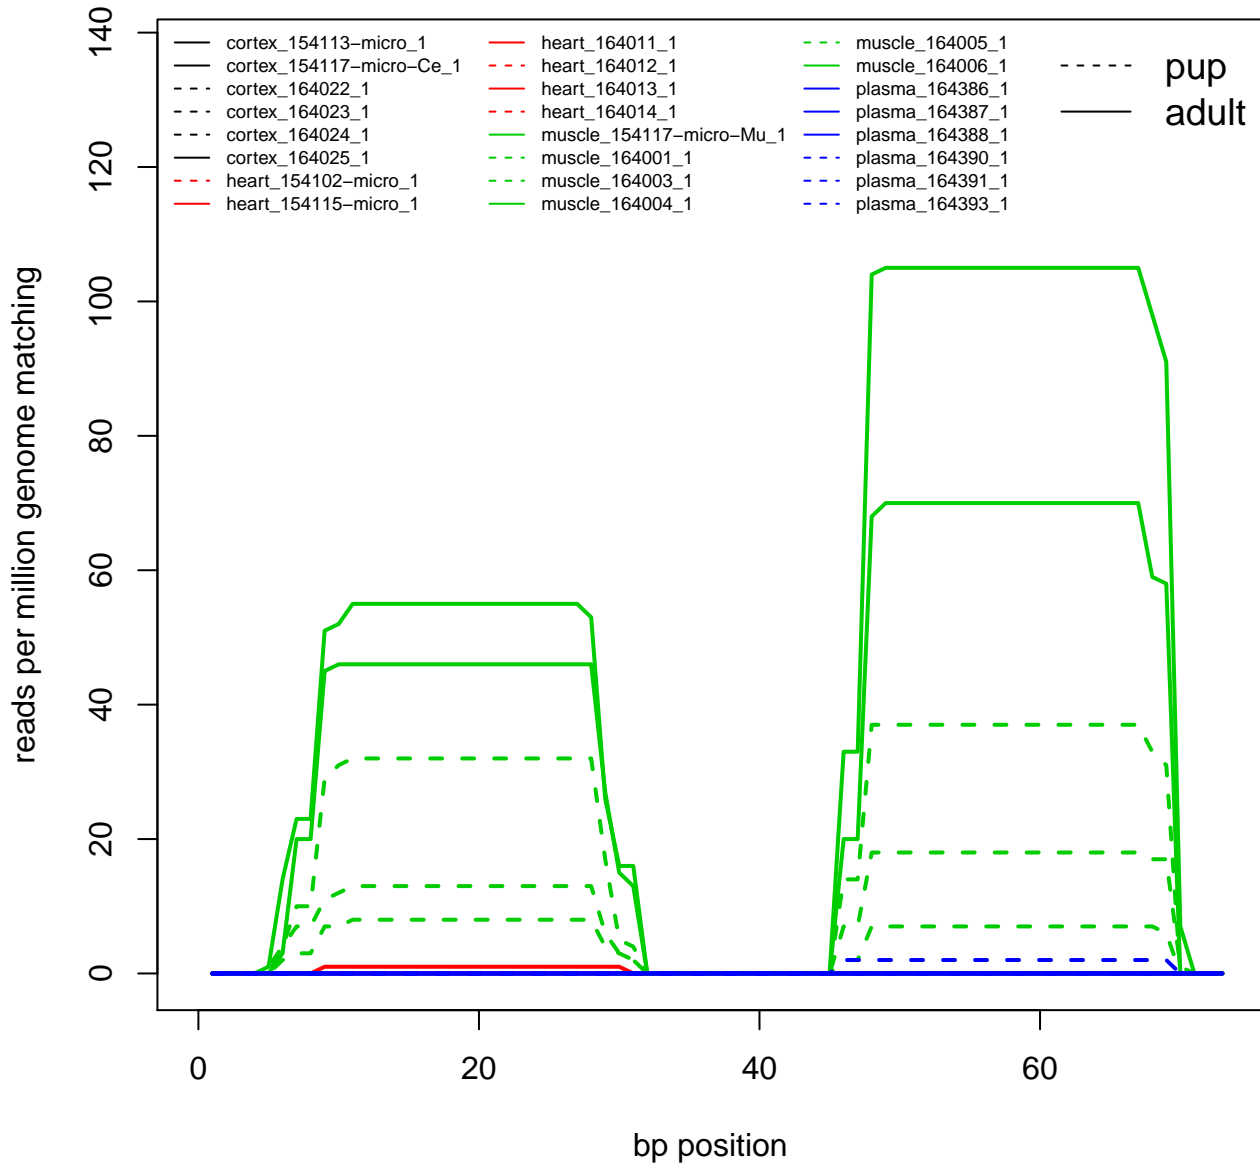

# lwe-miR-8986a\_loc1

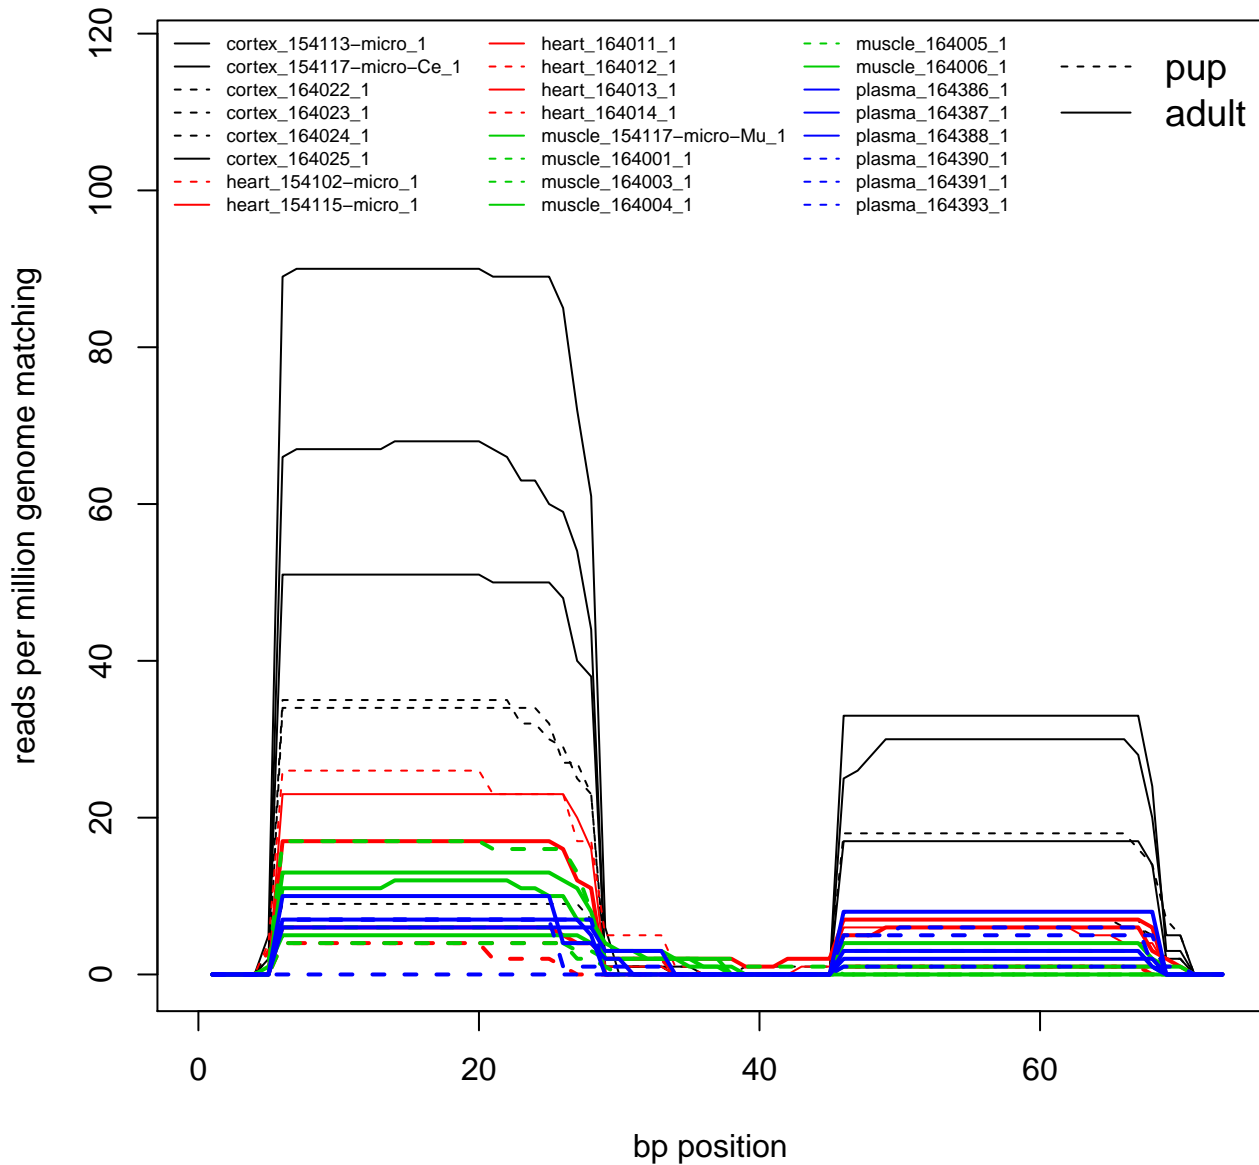

# lwe-miR-130\_loc1

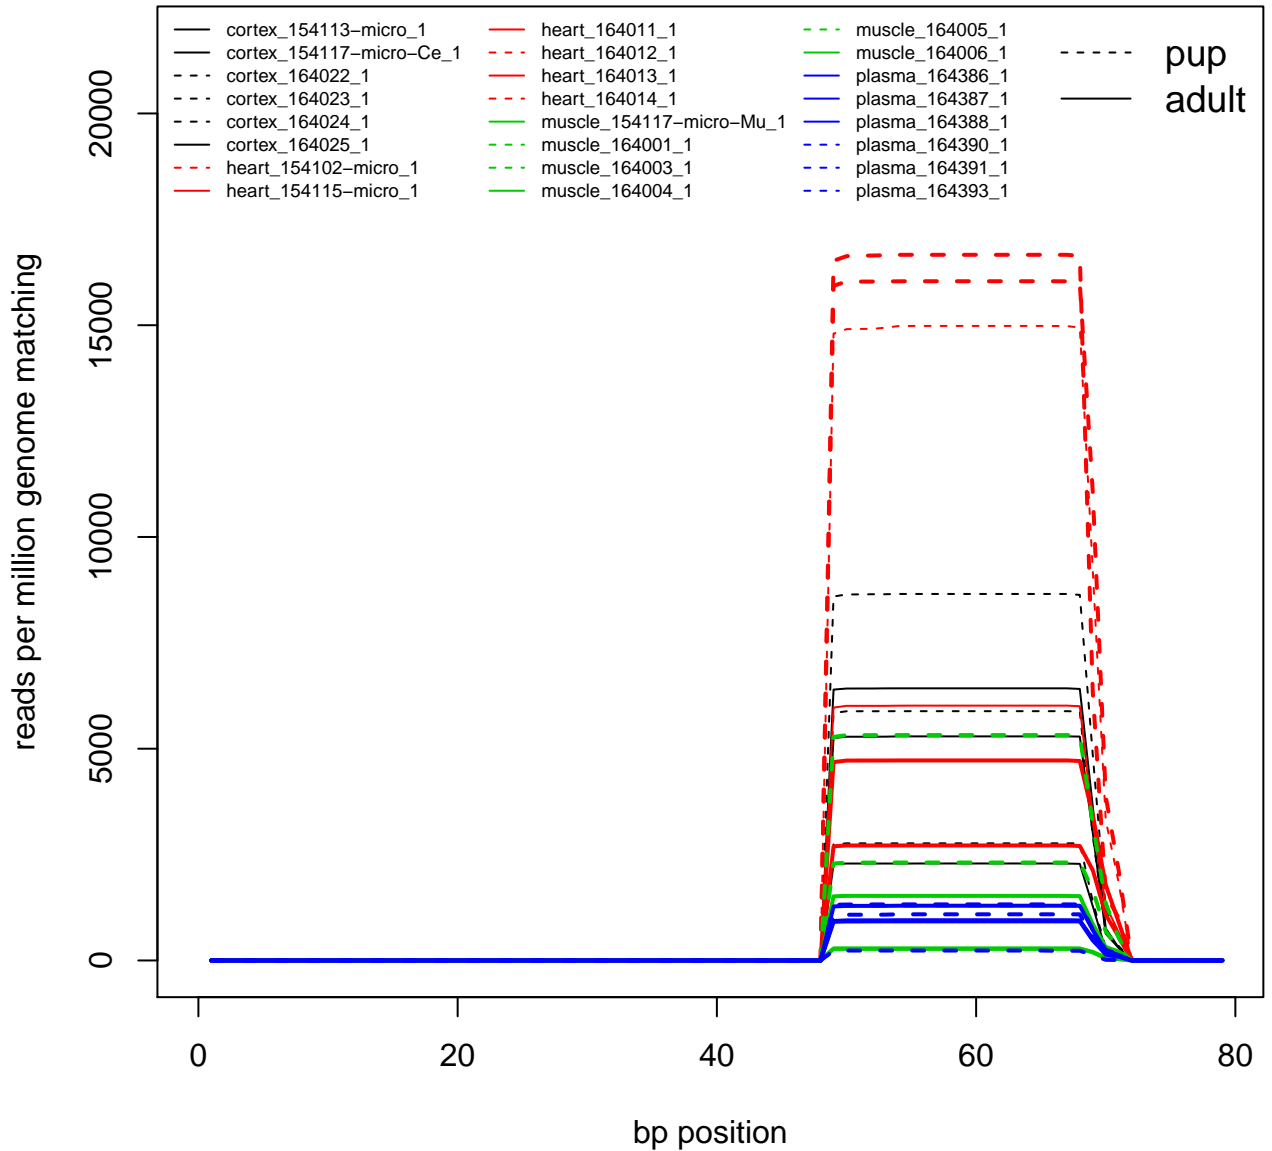

# novel\_3

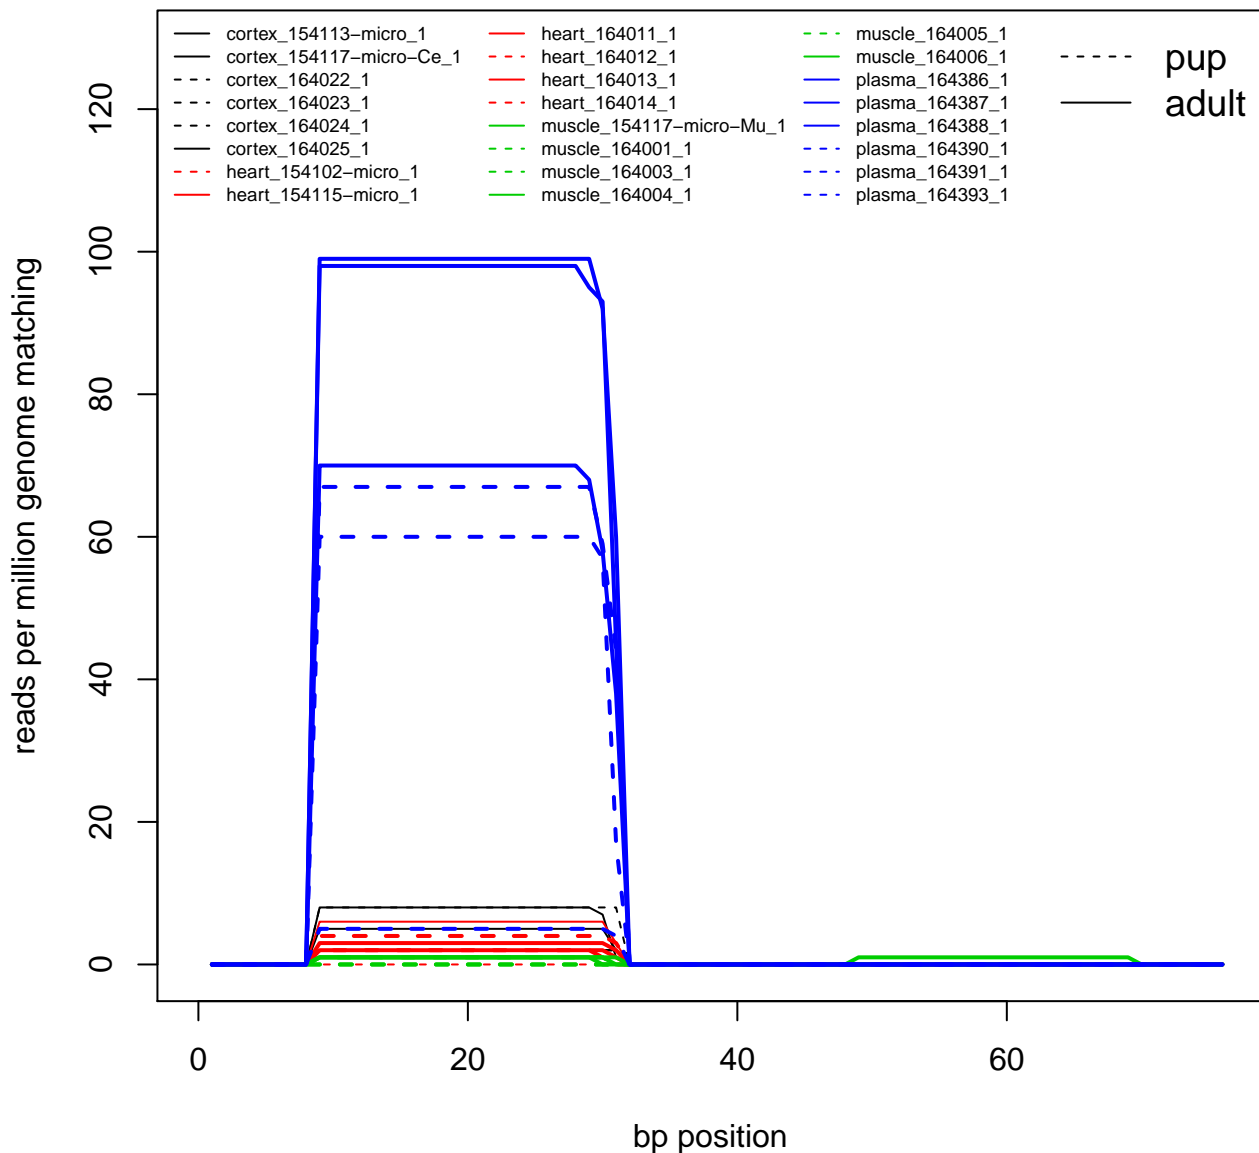

# lwe-miR-365a\_loc1

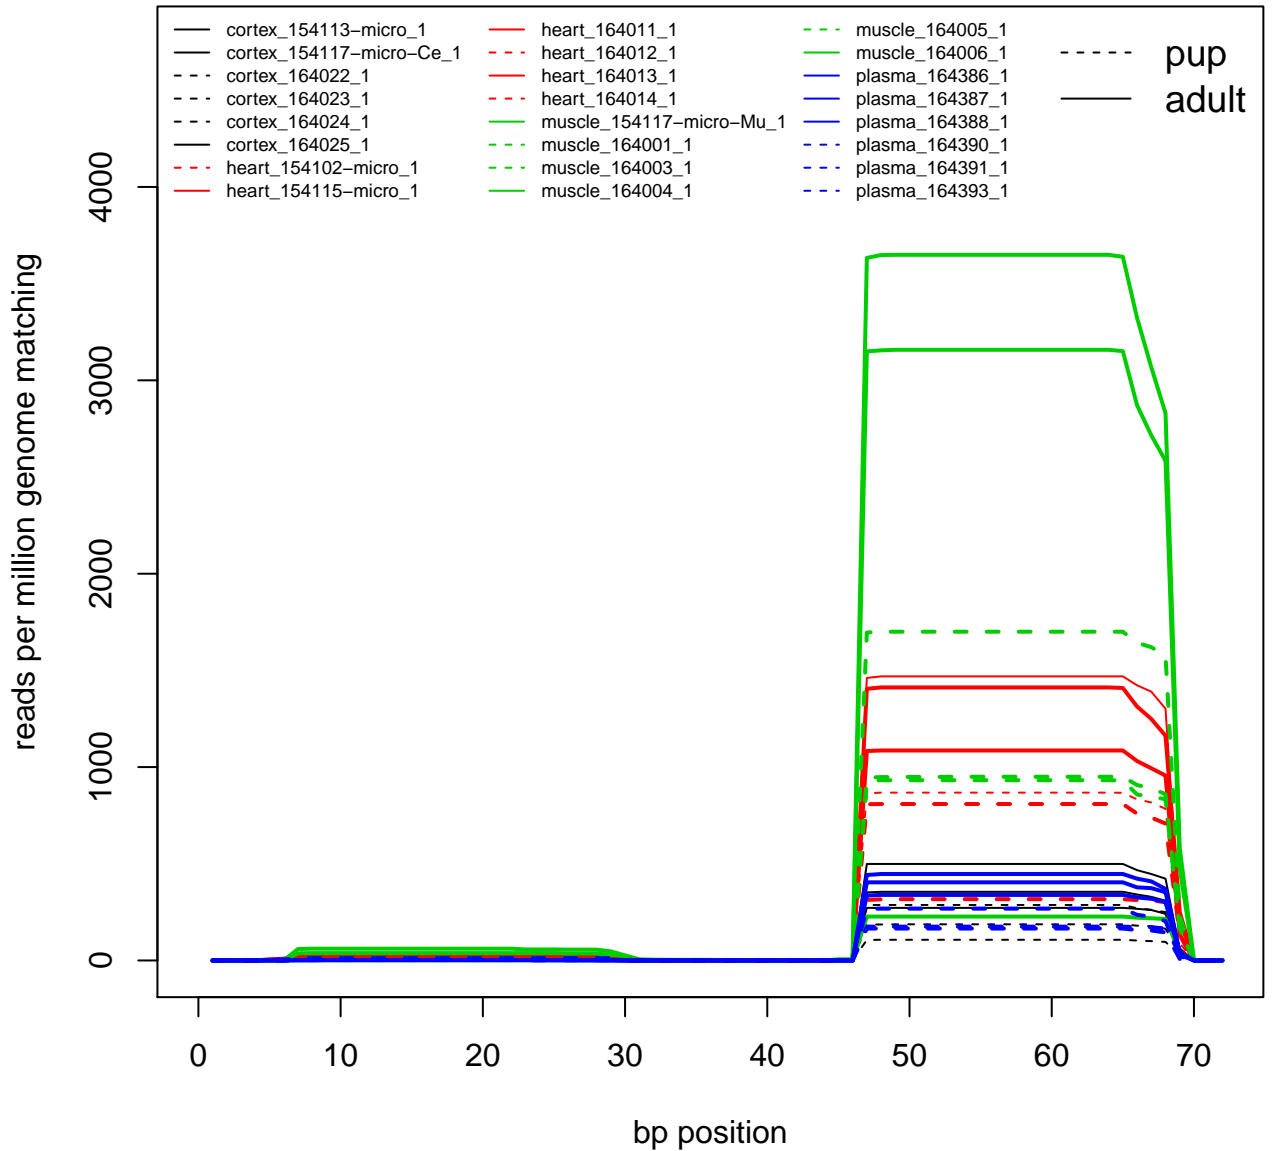

# lwe-miR-196\_loc1

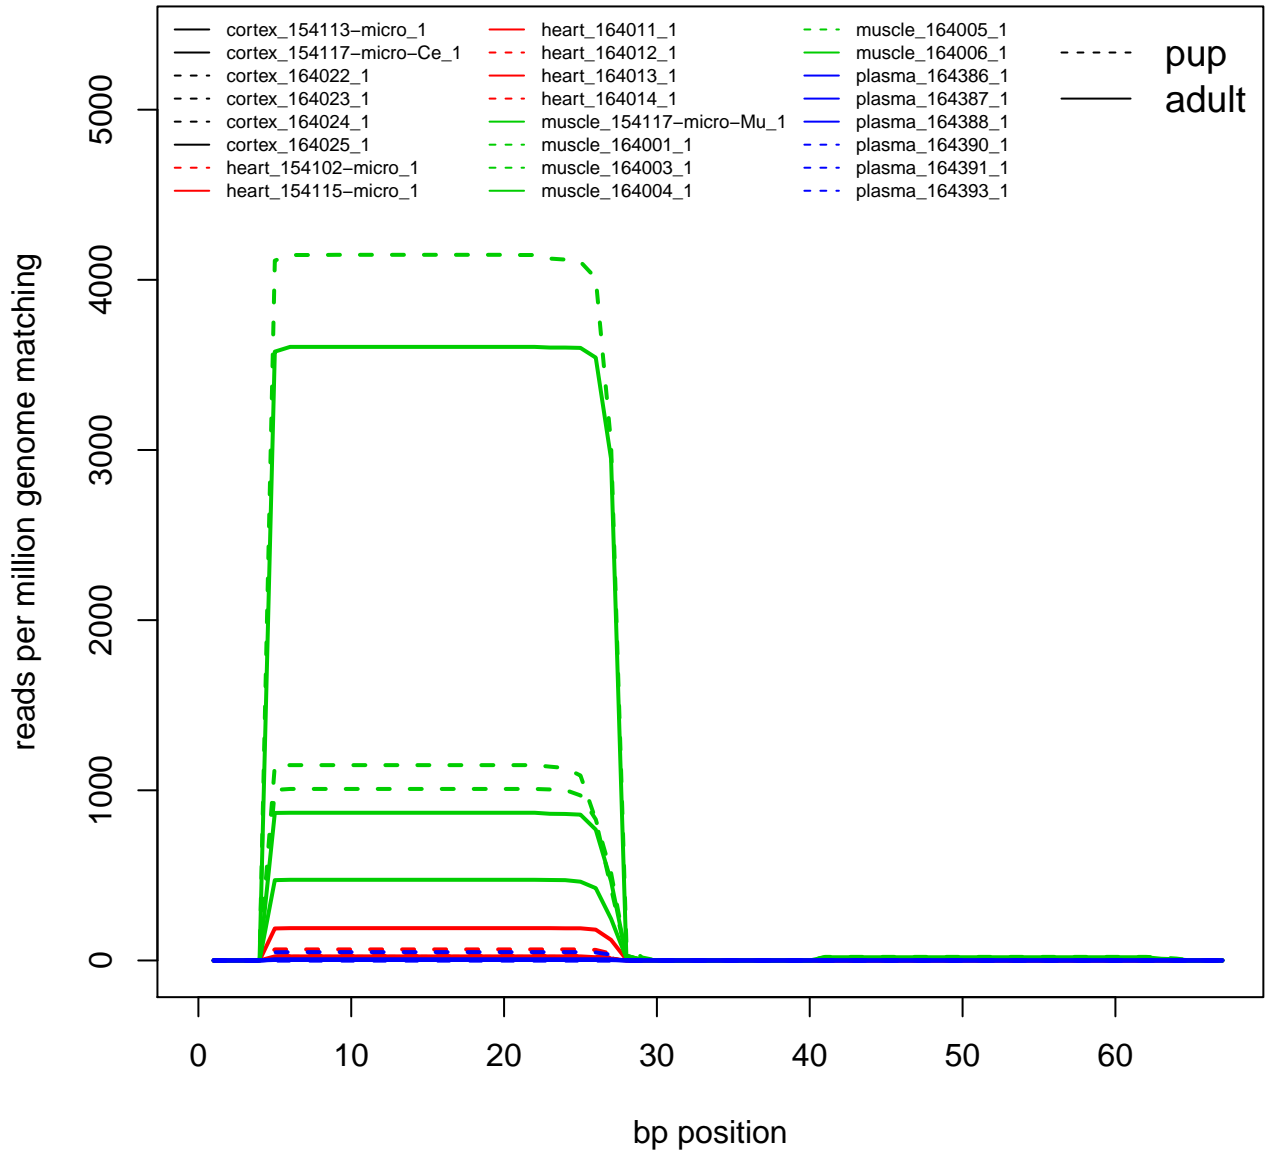

# lwe-miR-148b\_loc1

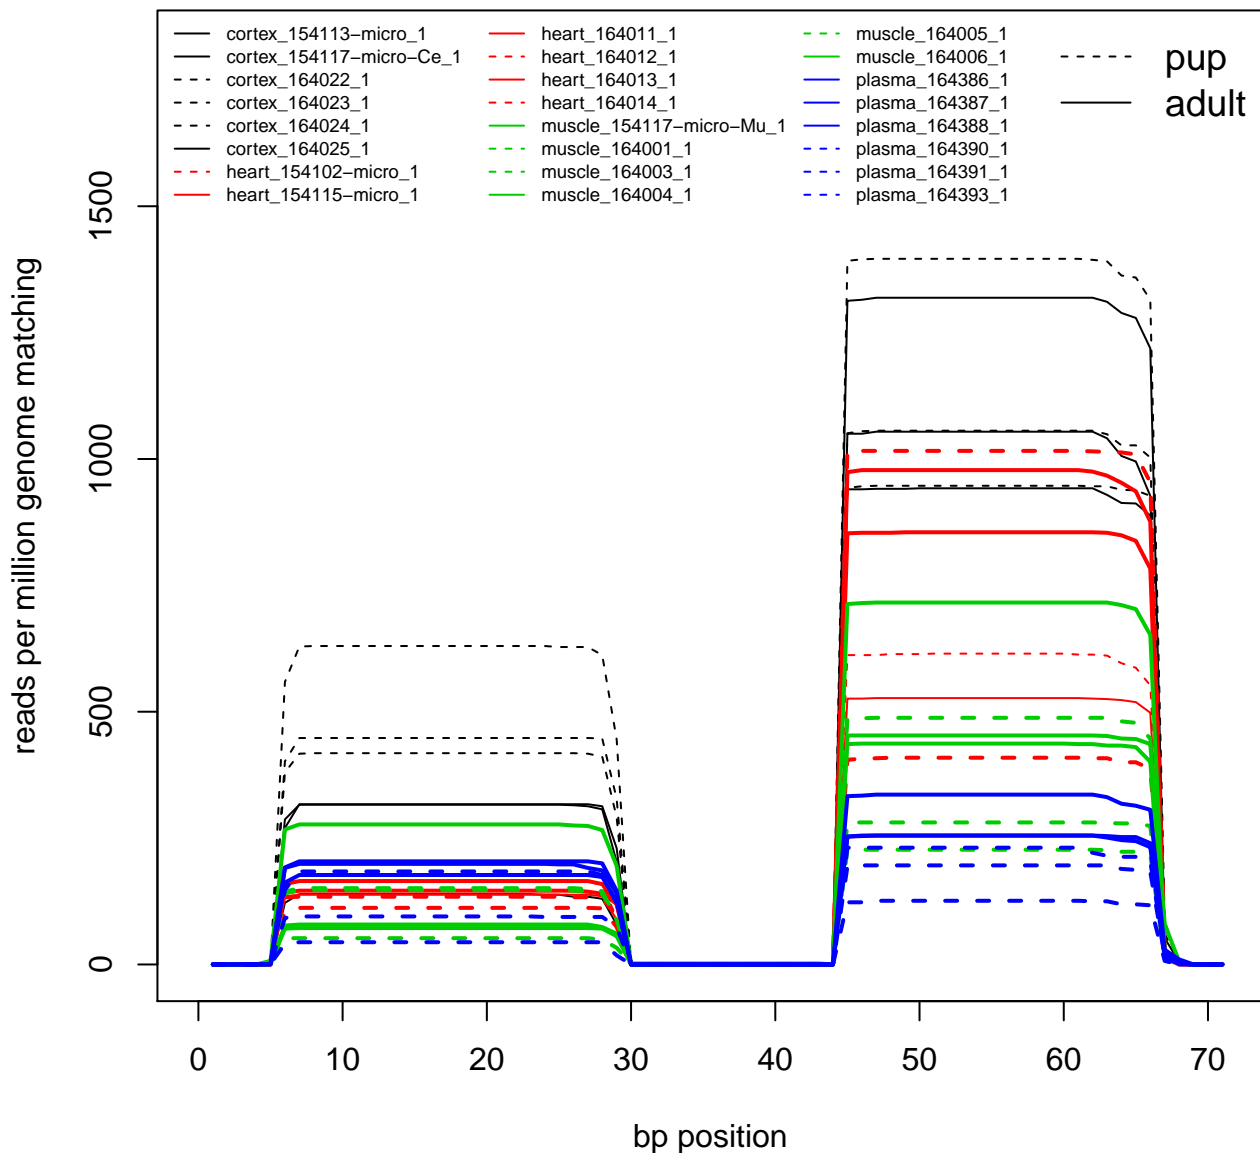



# lwe-miR-129a\_loc1

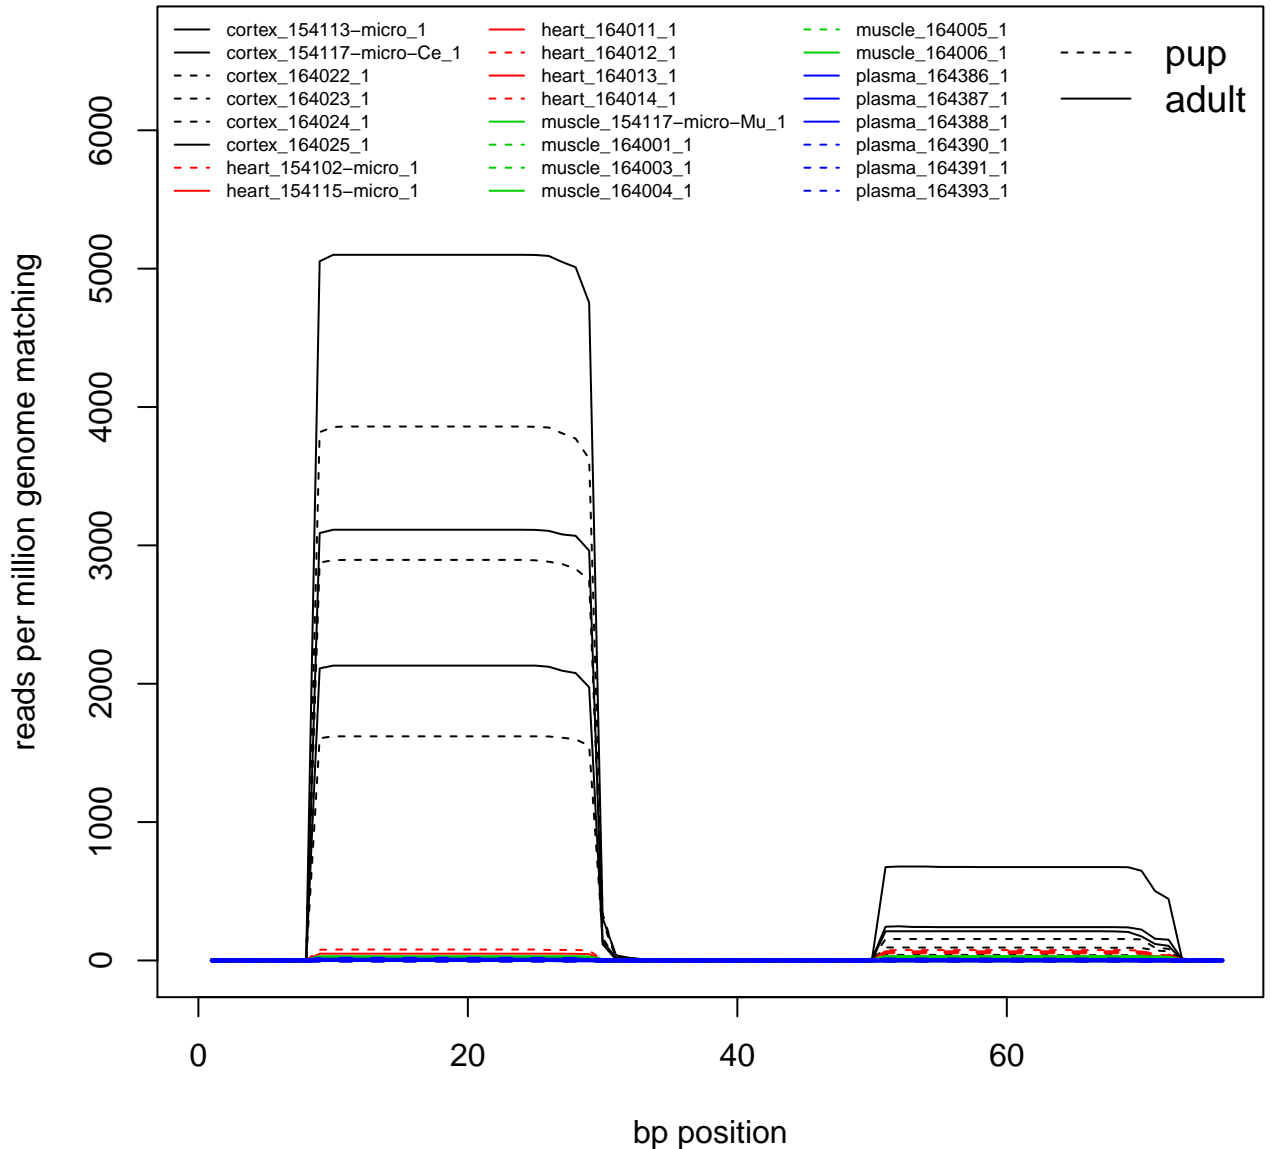

# novel\_4

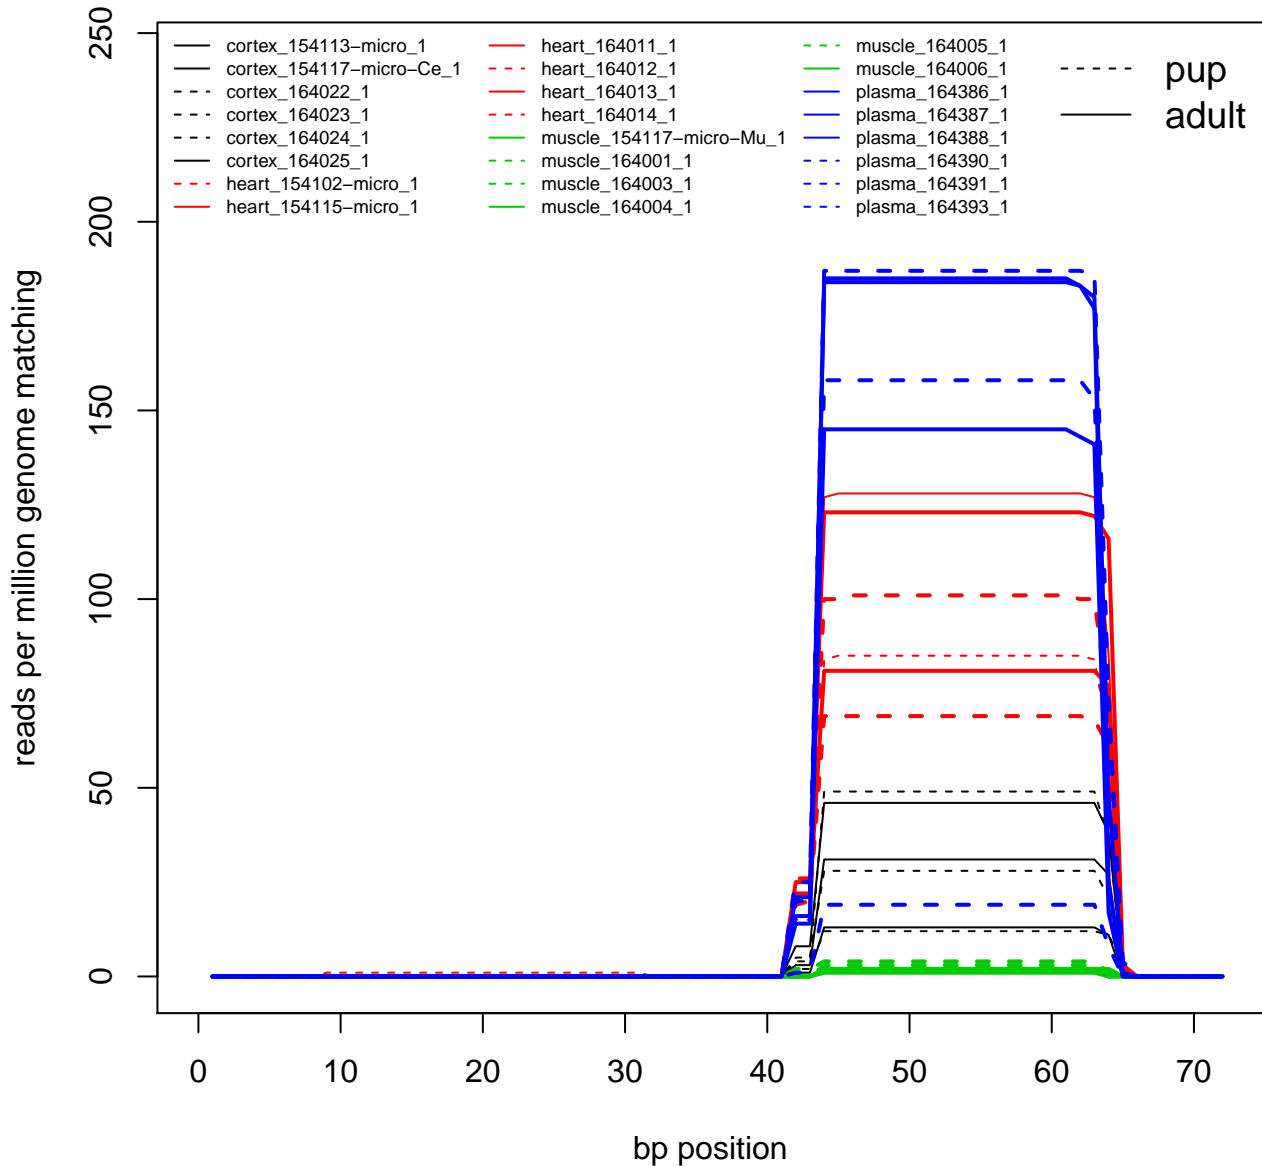

# lwe-miR-29a\_loc1

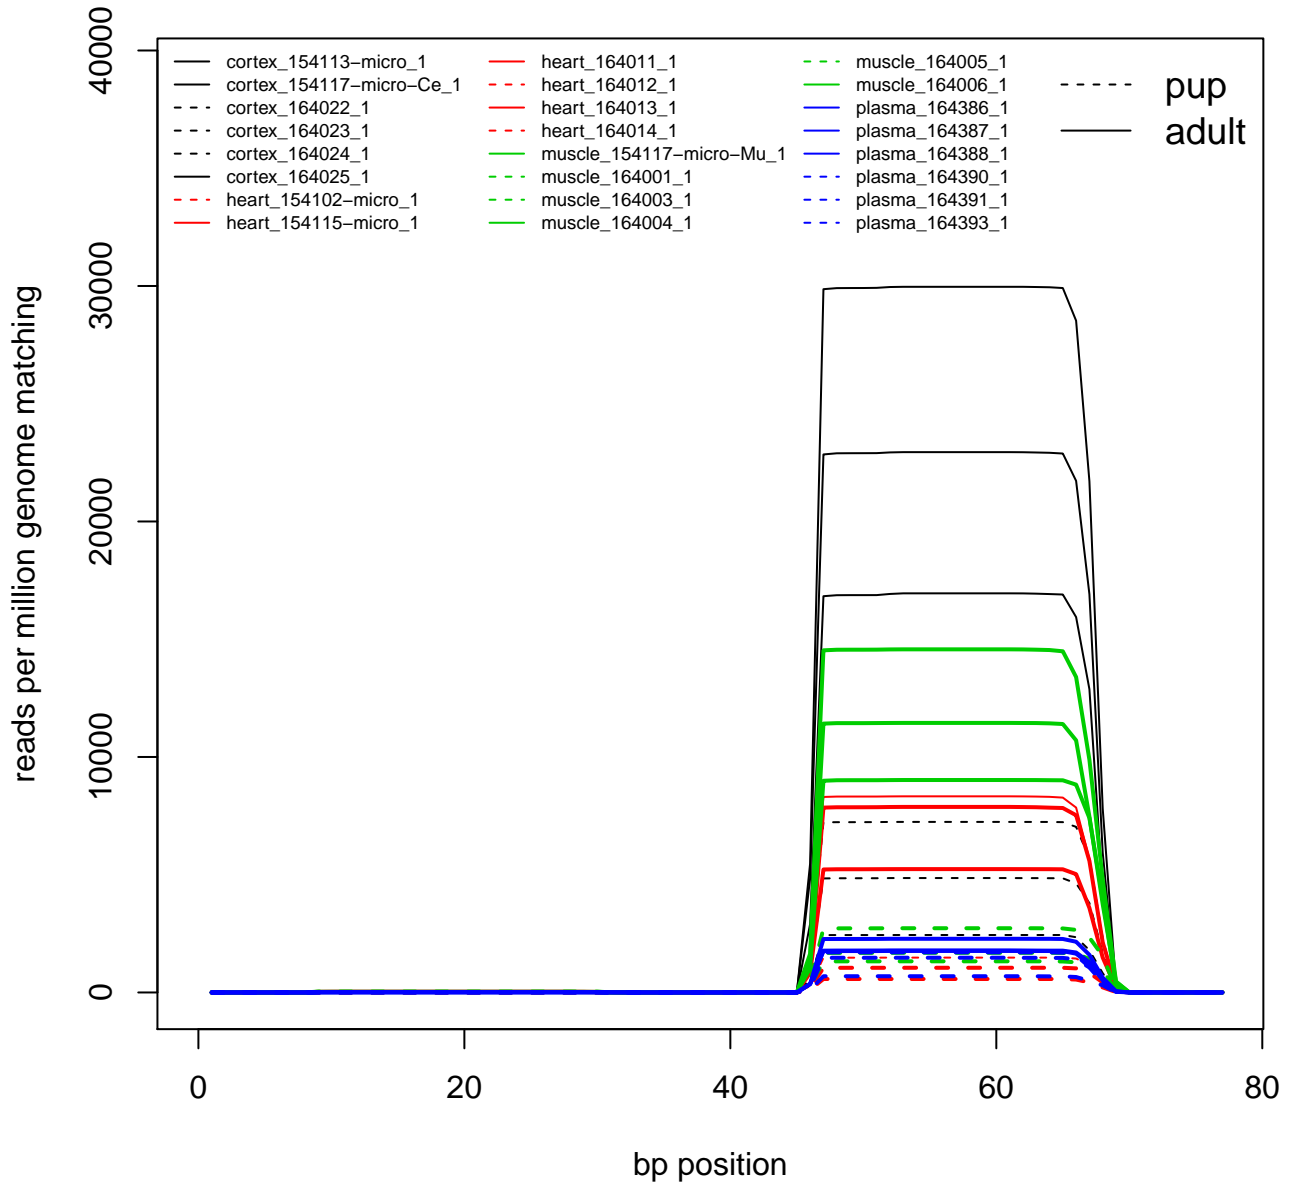

# lwe-miR-29b\_loc1

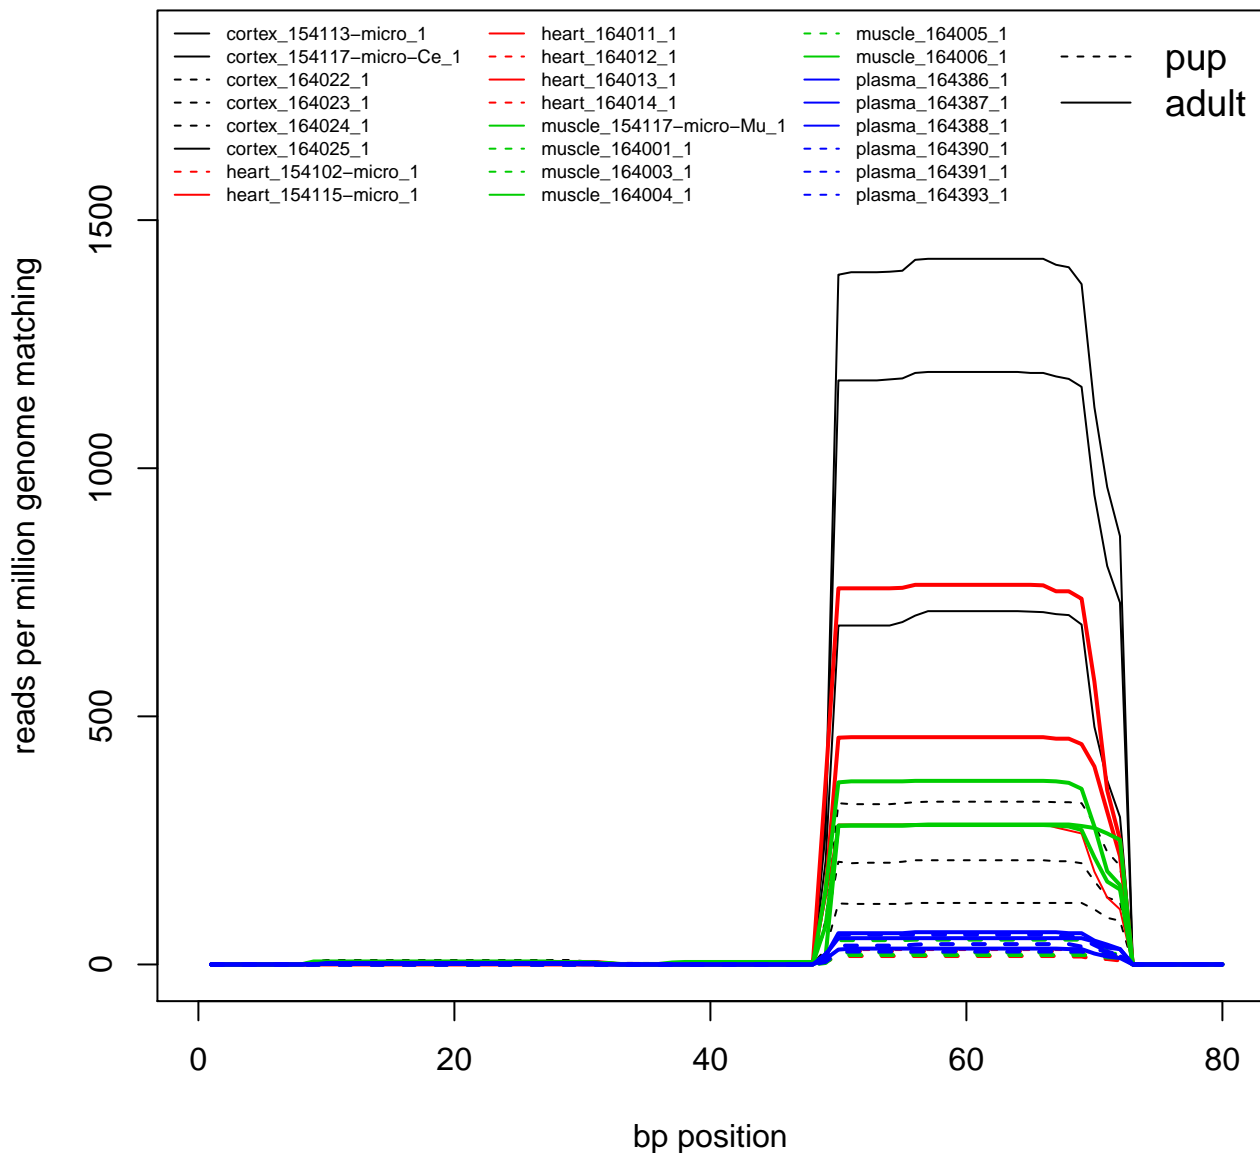



# novel\_6

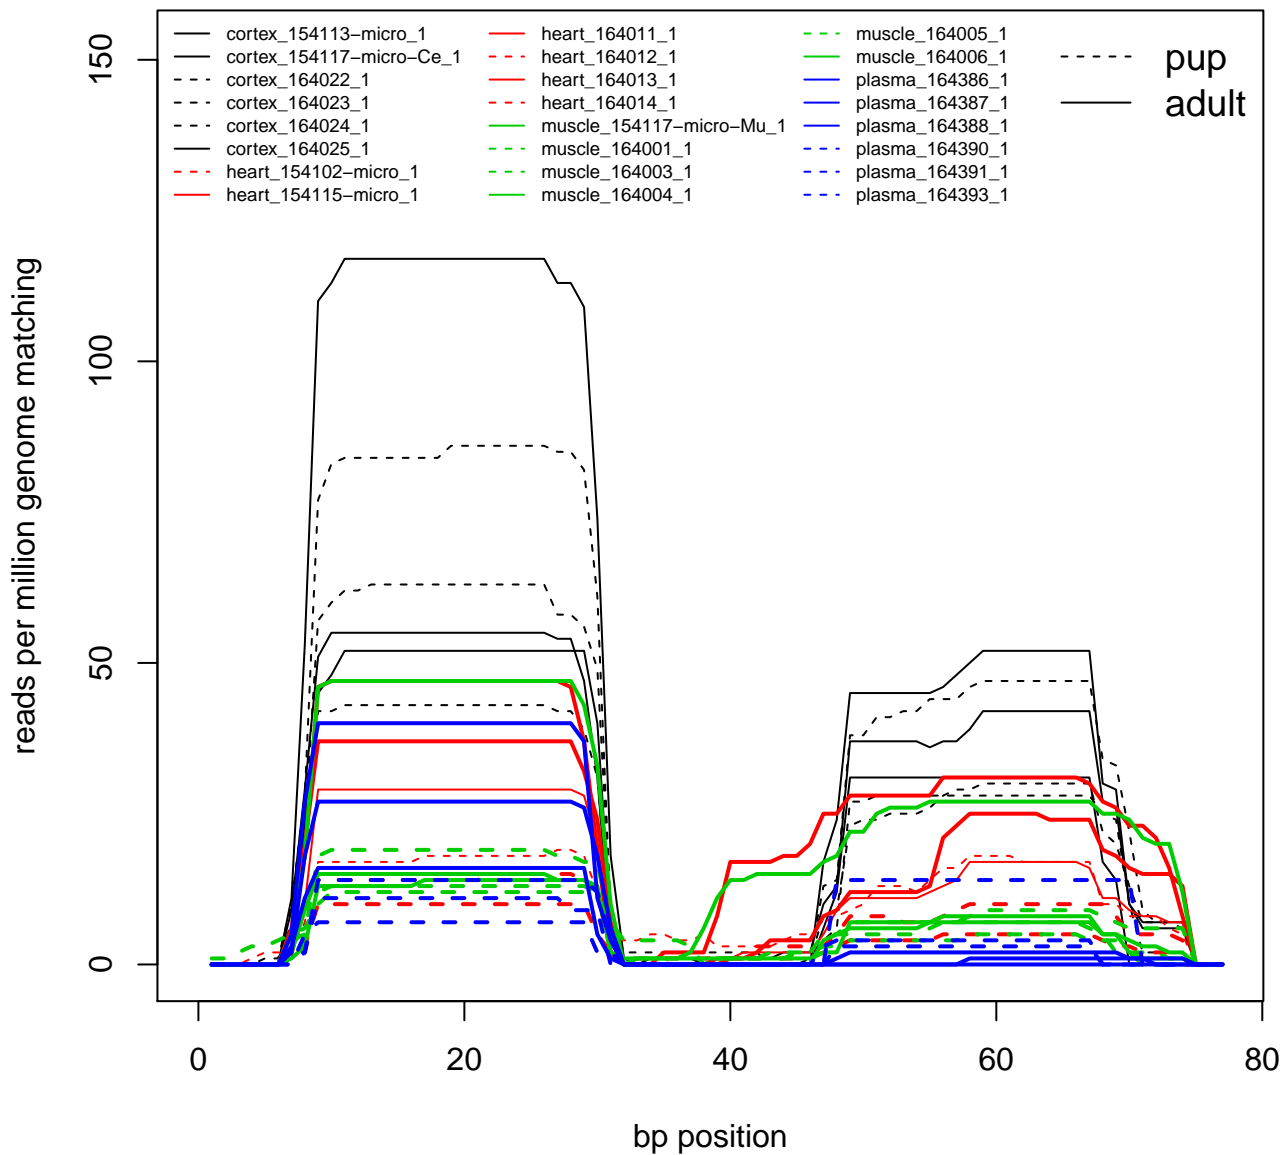

# lwe-miR-204a\_loc1

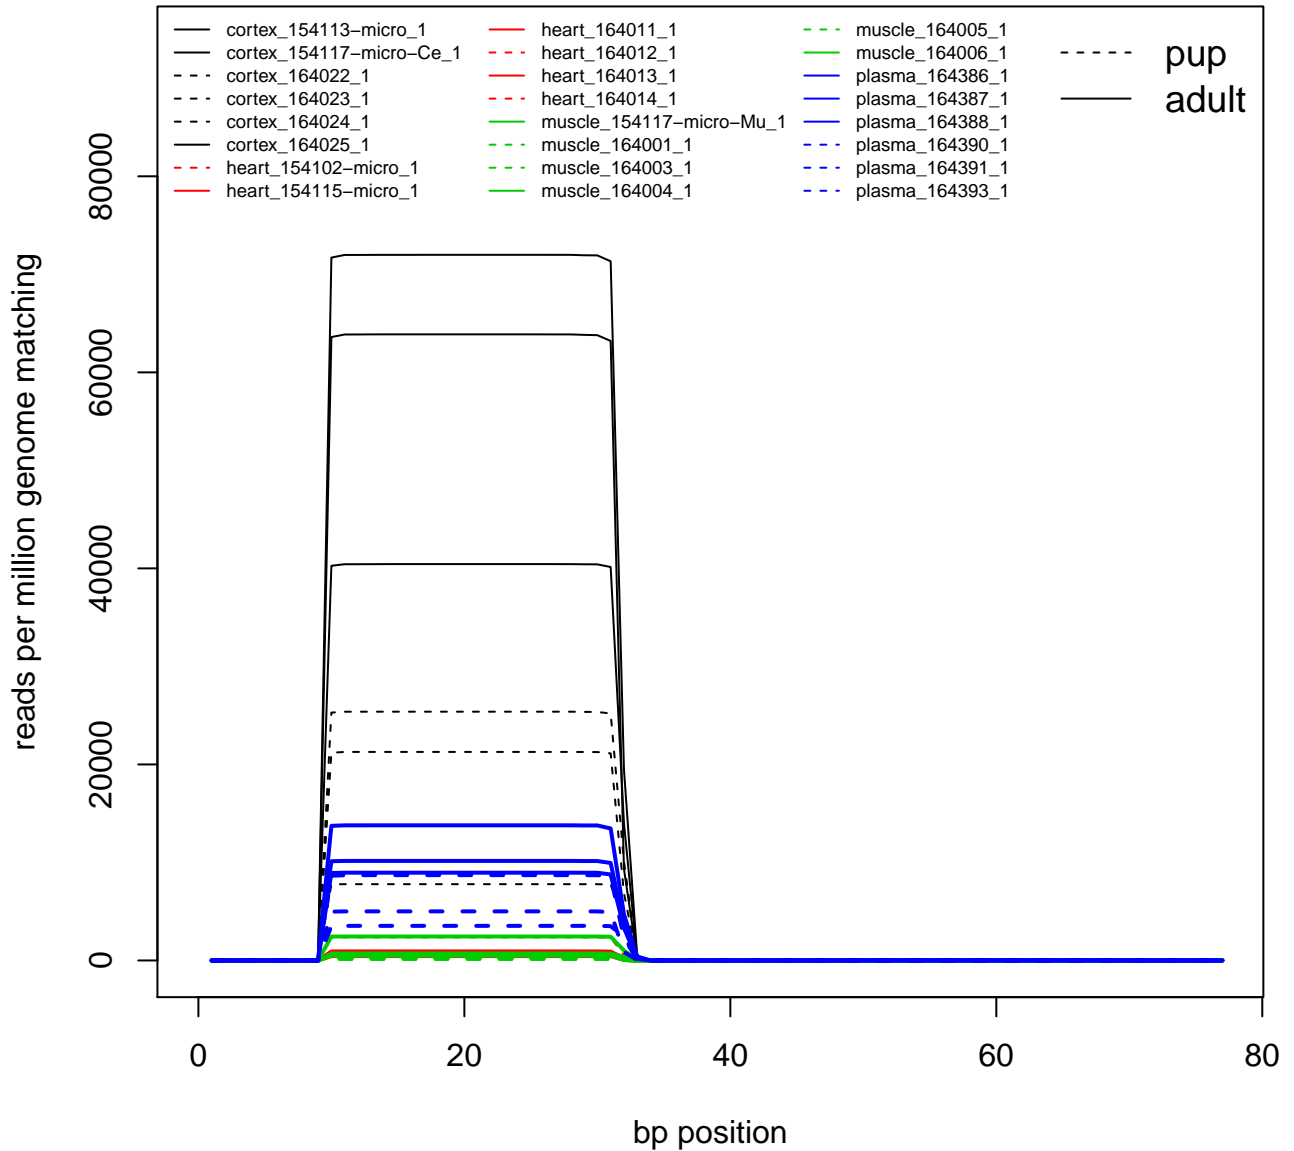

# lwe-miR-181a\_loc1

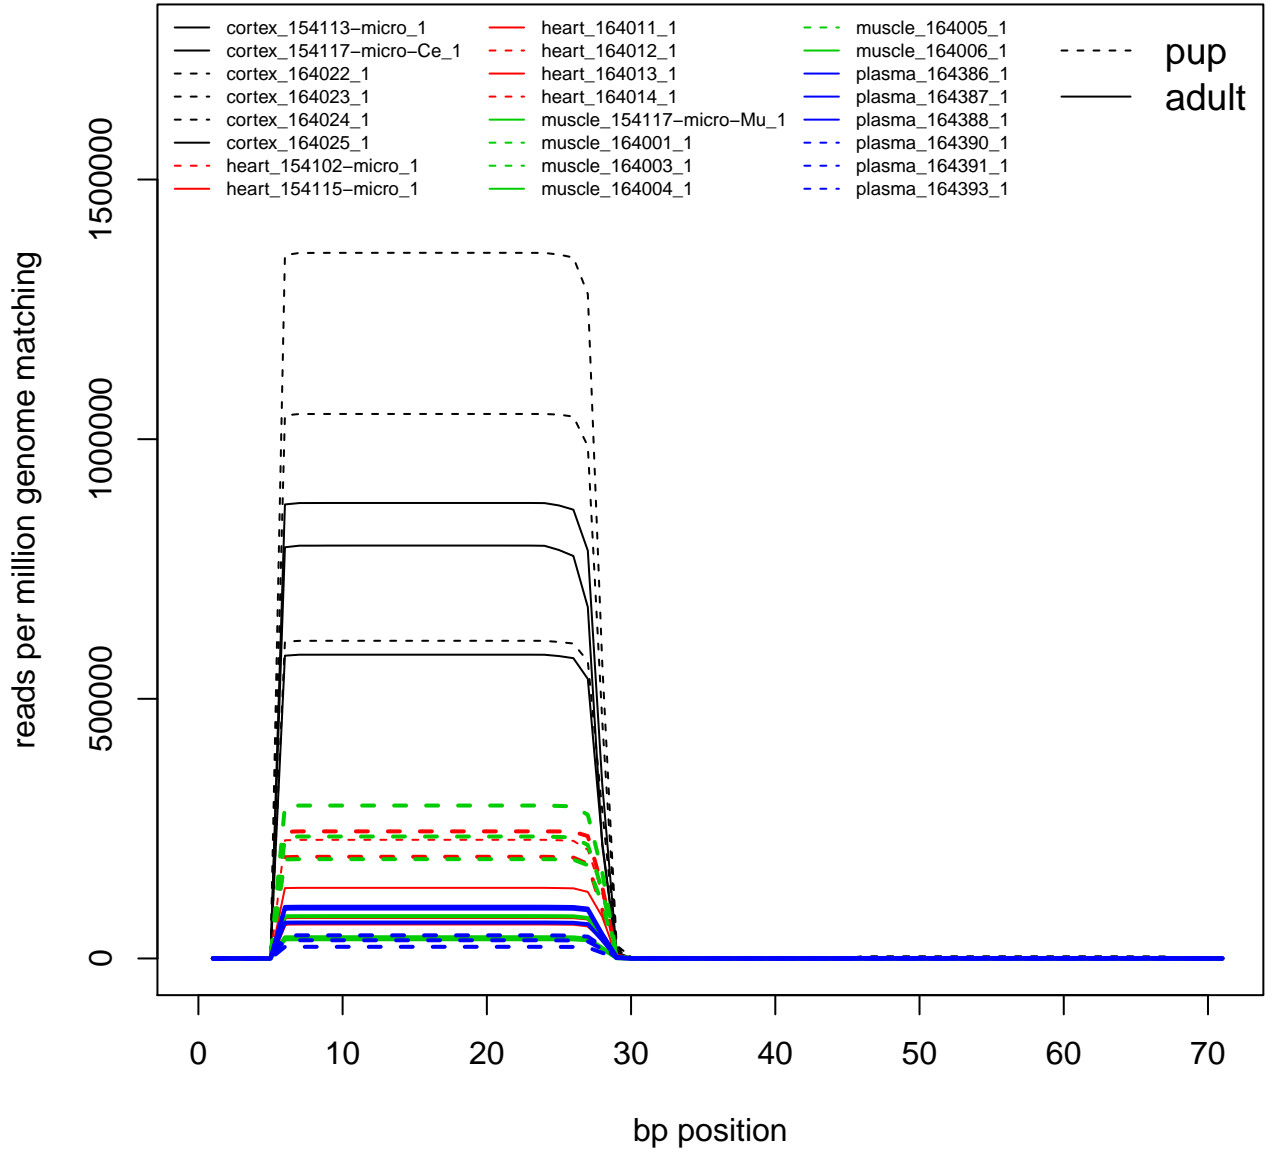



# lwe-miR-181b\_loc1

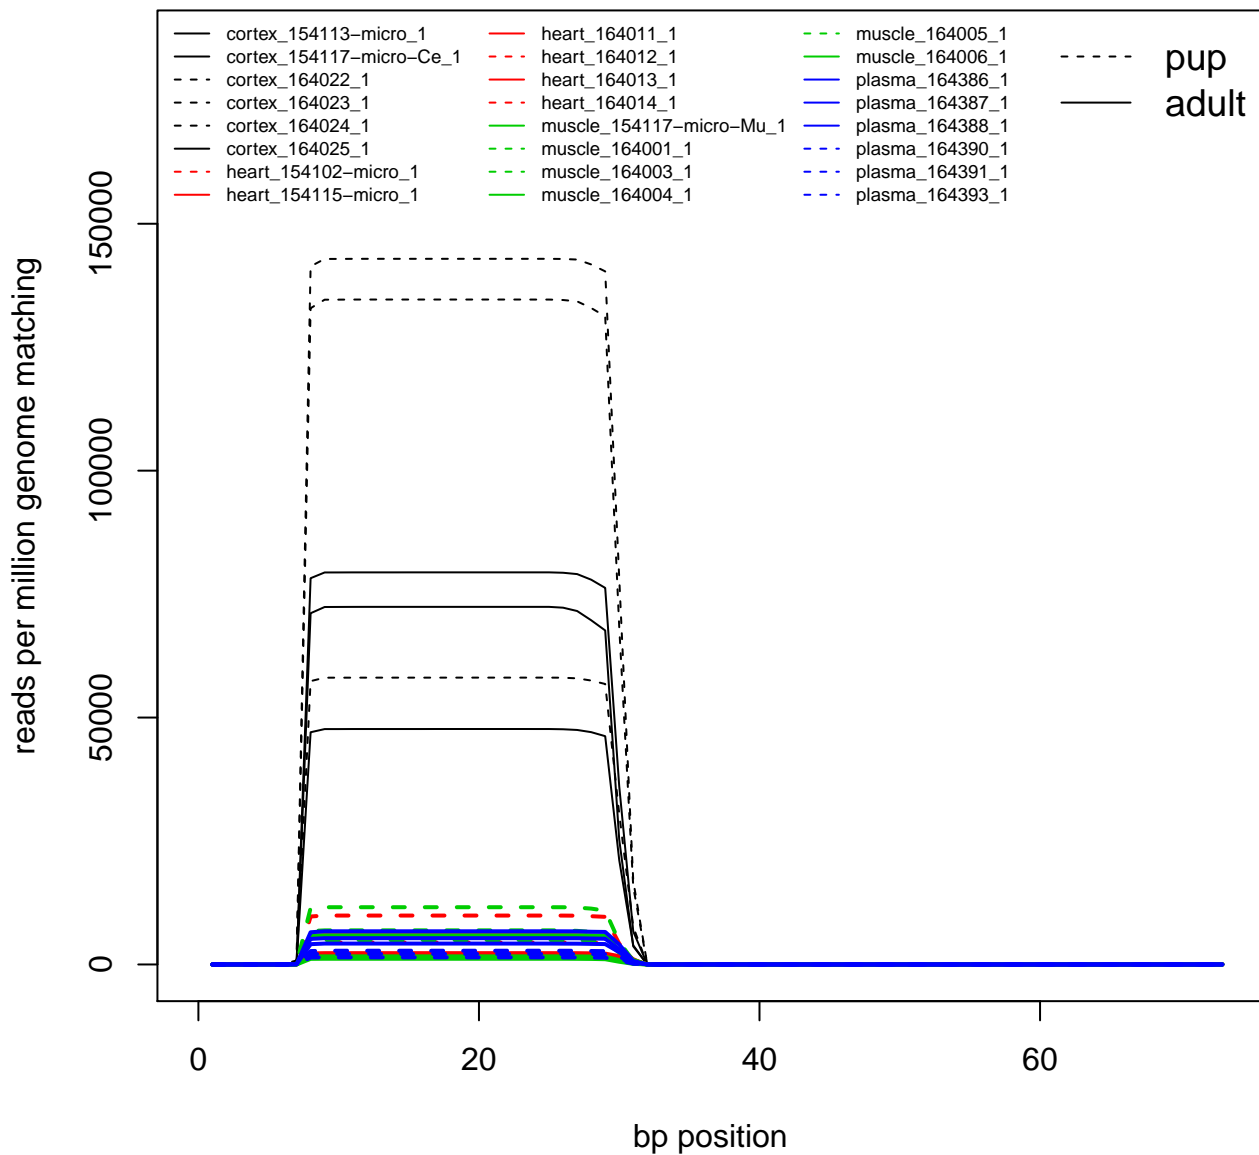

# novel\_7

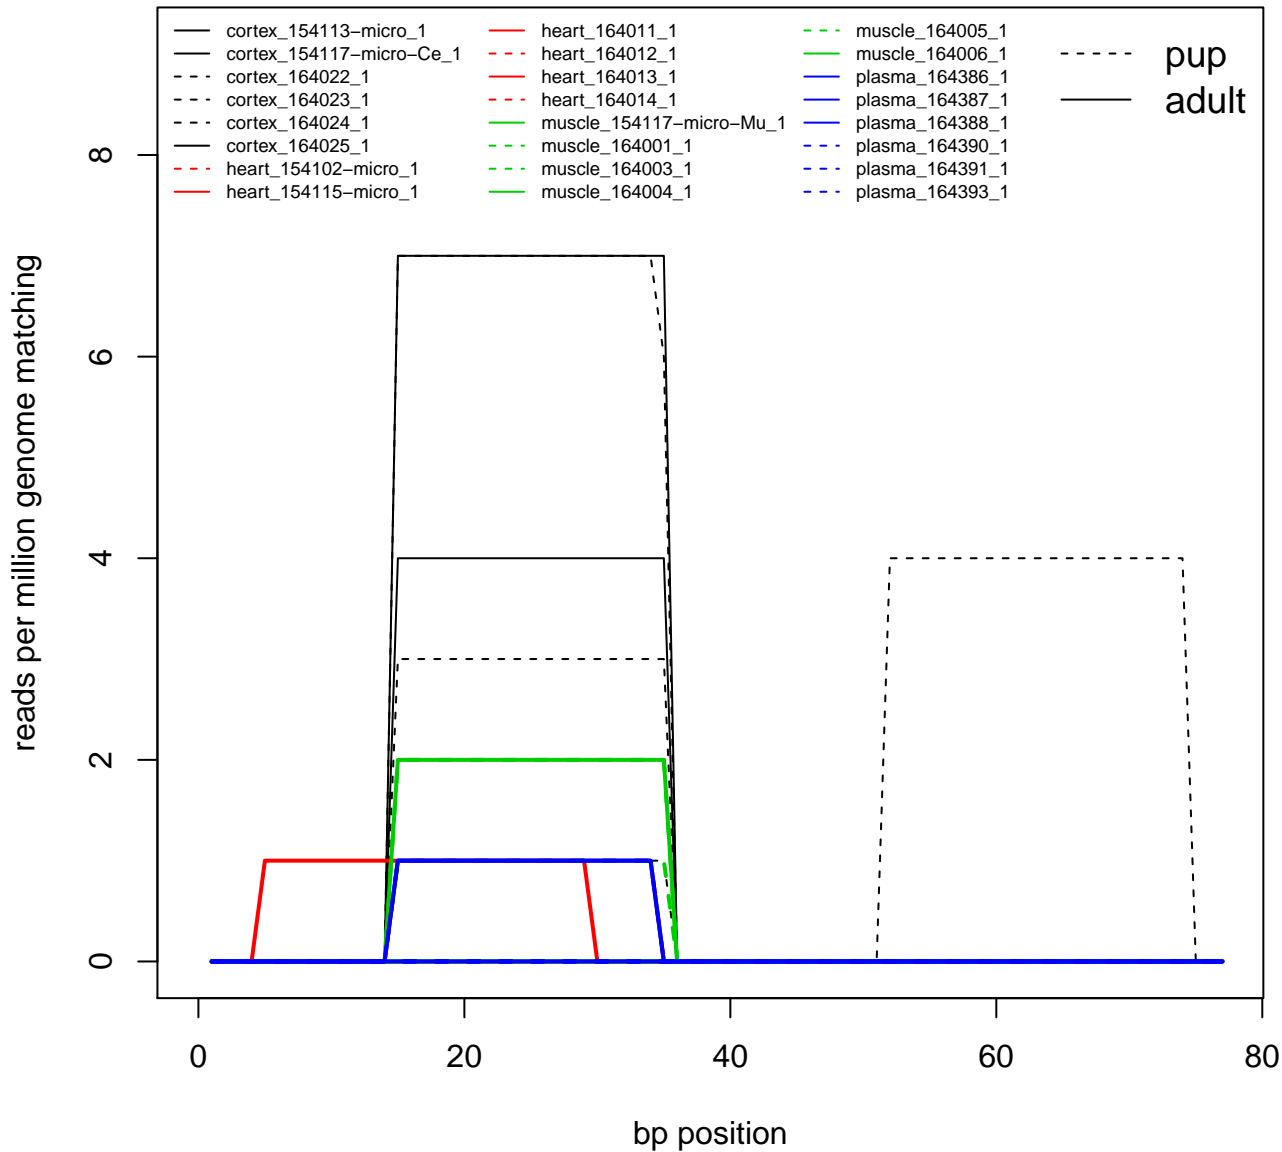

# lwe-miR-128a\_loc1

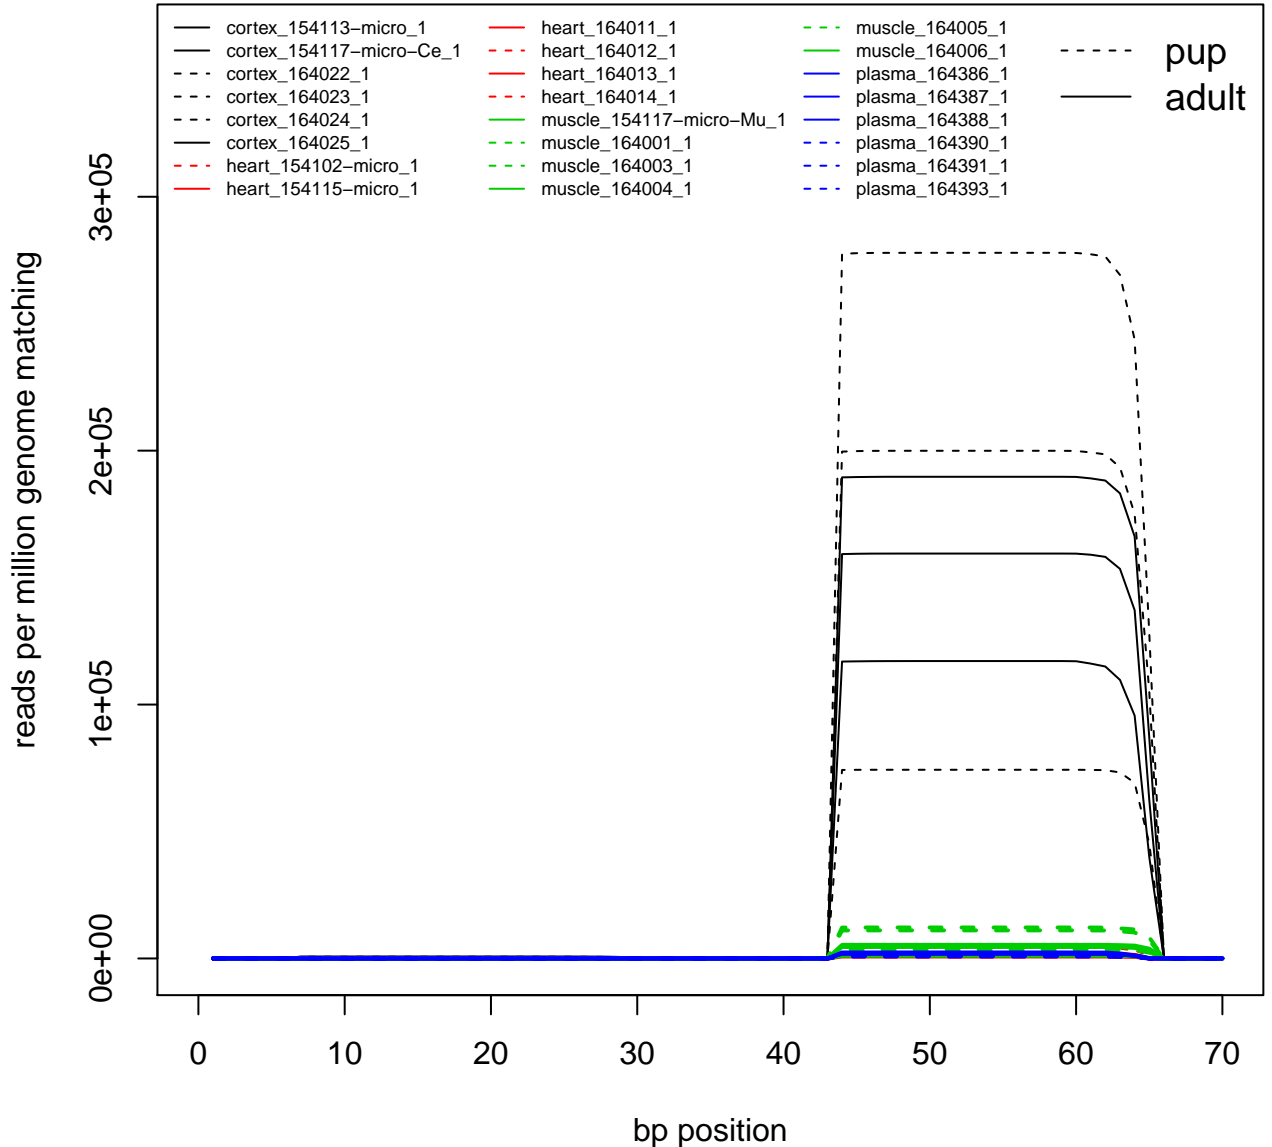

# novel\_8

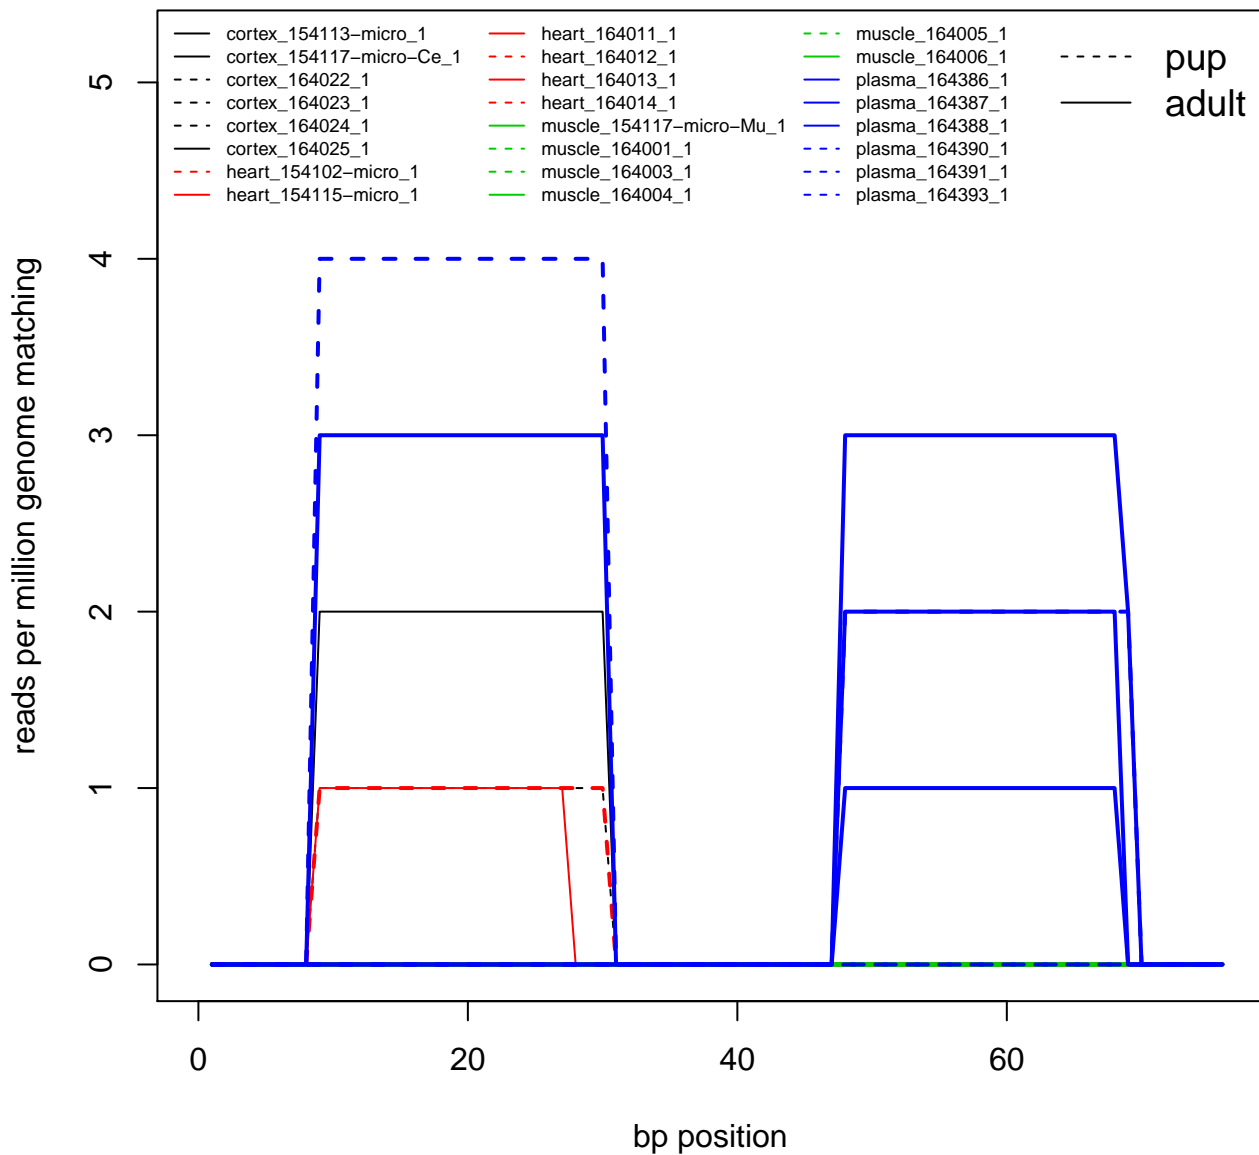





# novel\_11

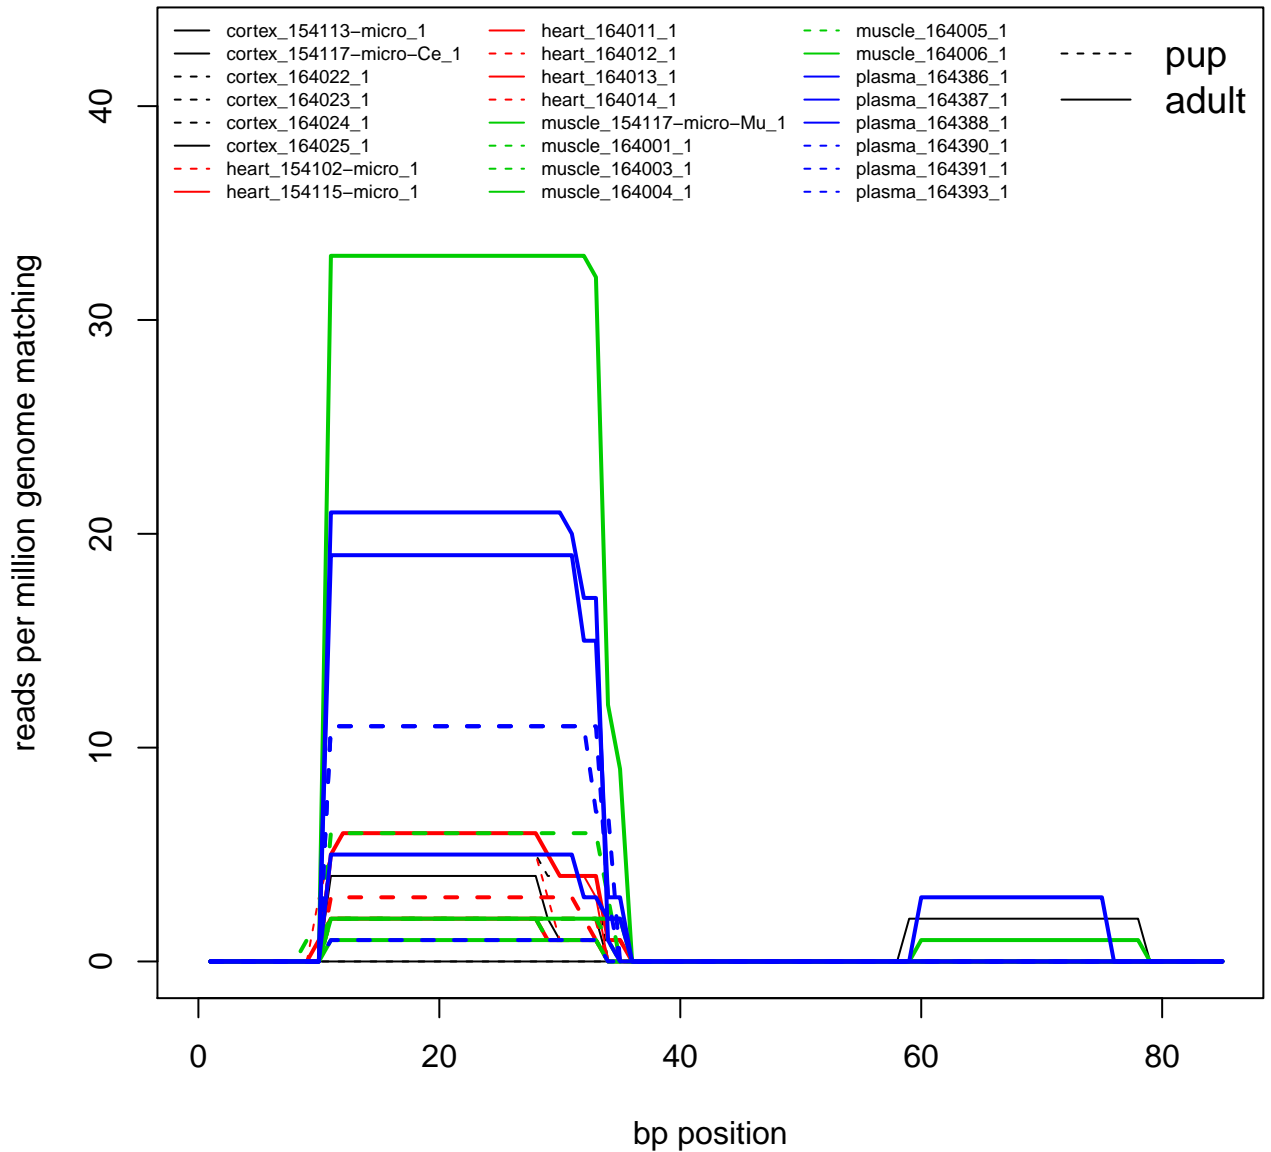

# novel\_12

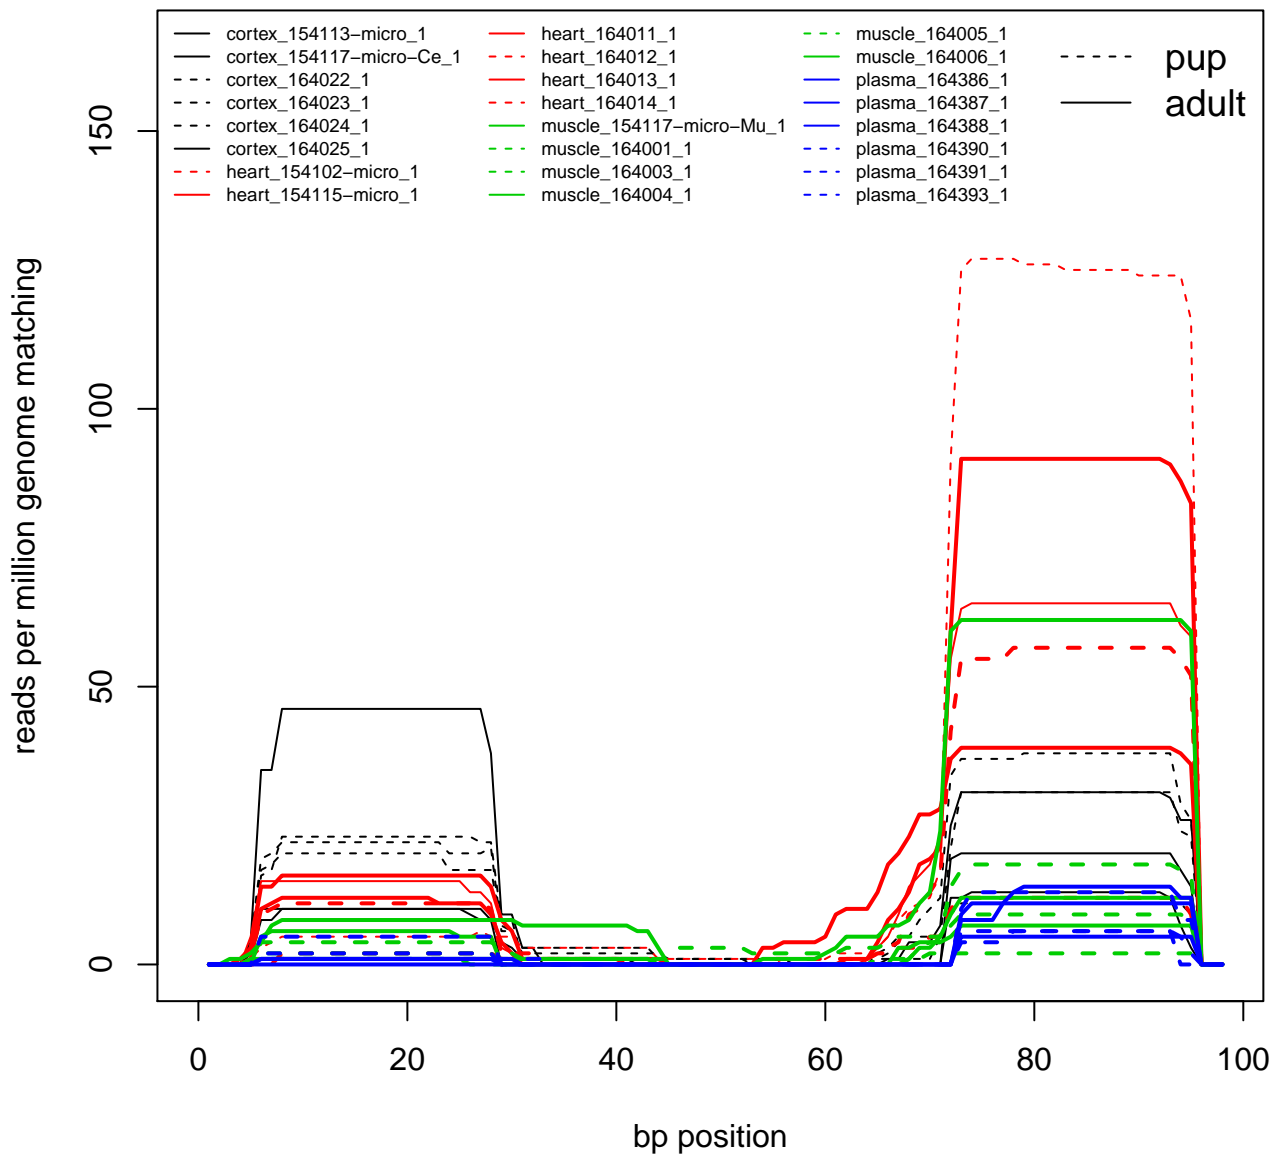





# lwe-miR-29e\_loc1

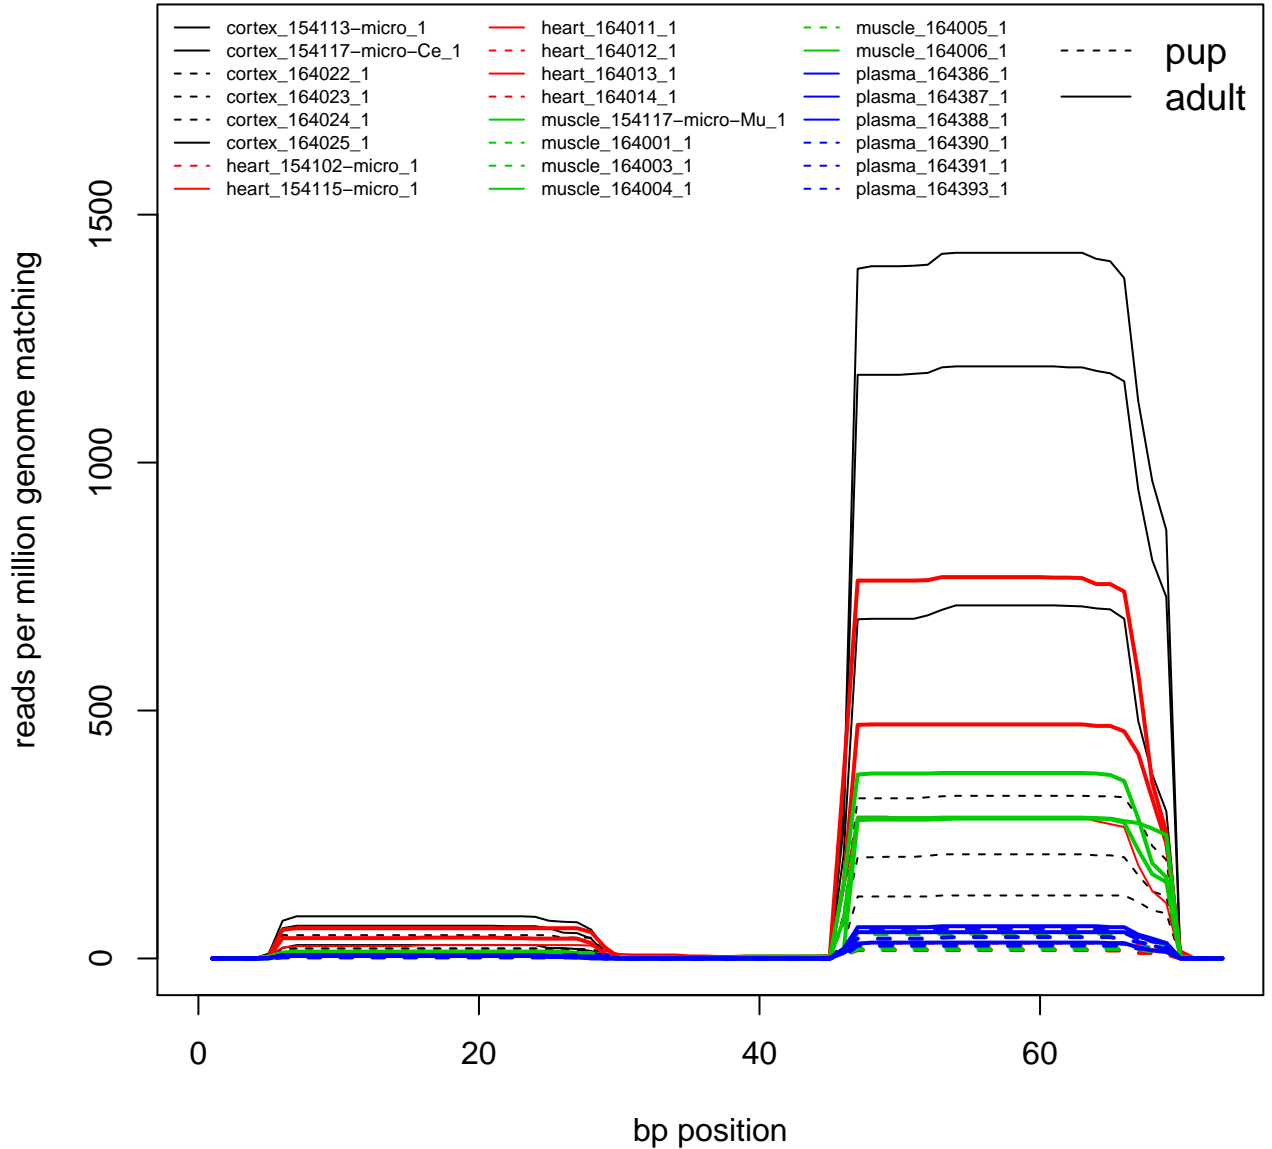

# lwe-miR-29c-1\_loc1

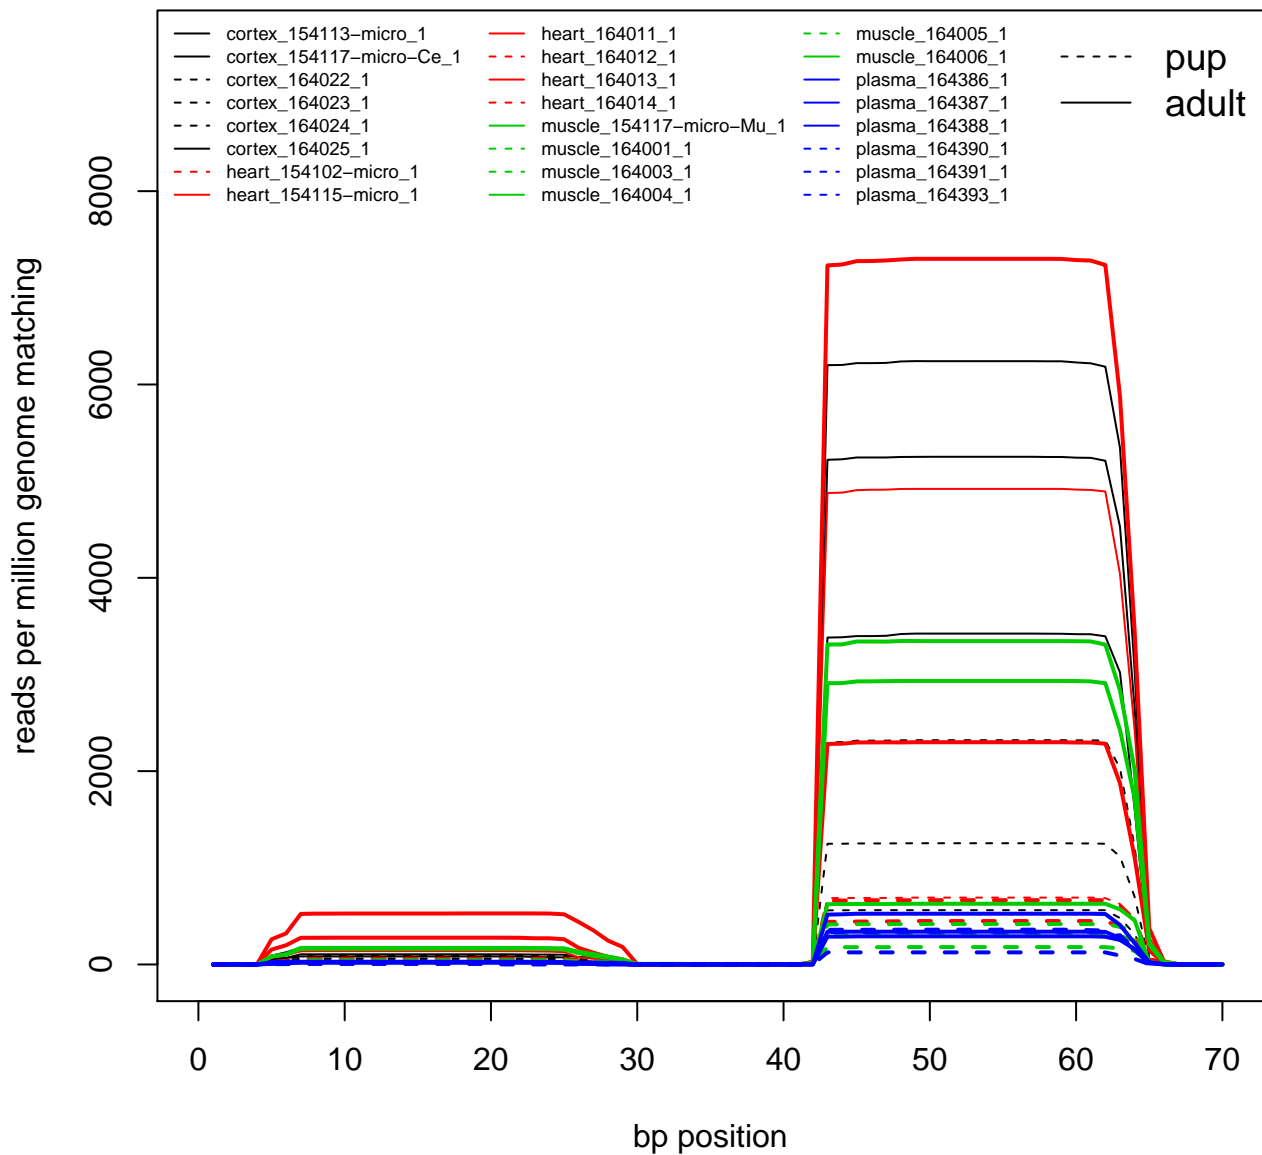

# novel\_13

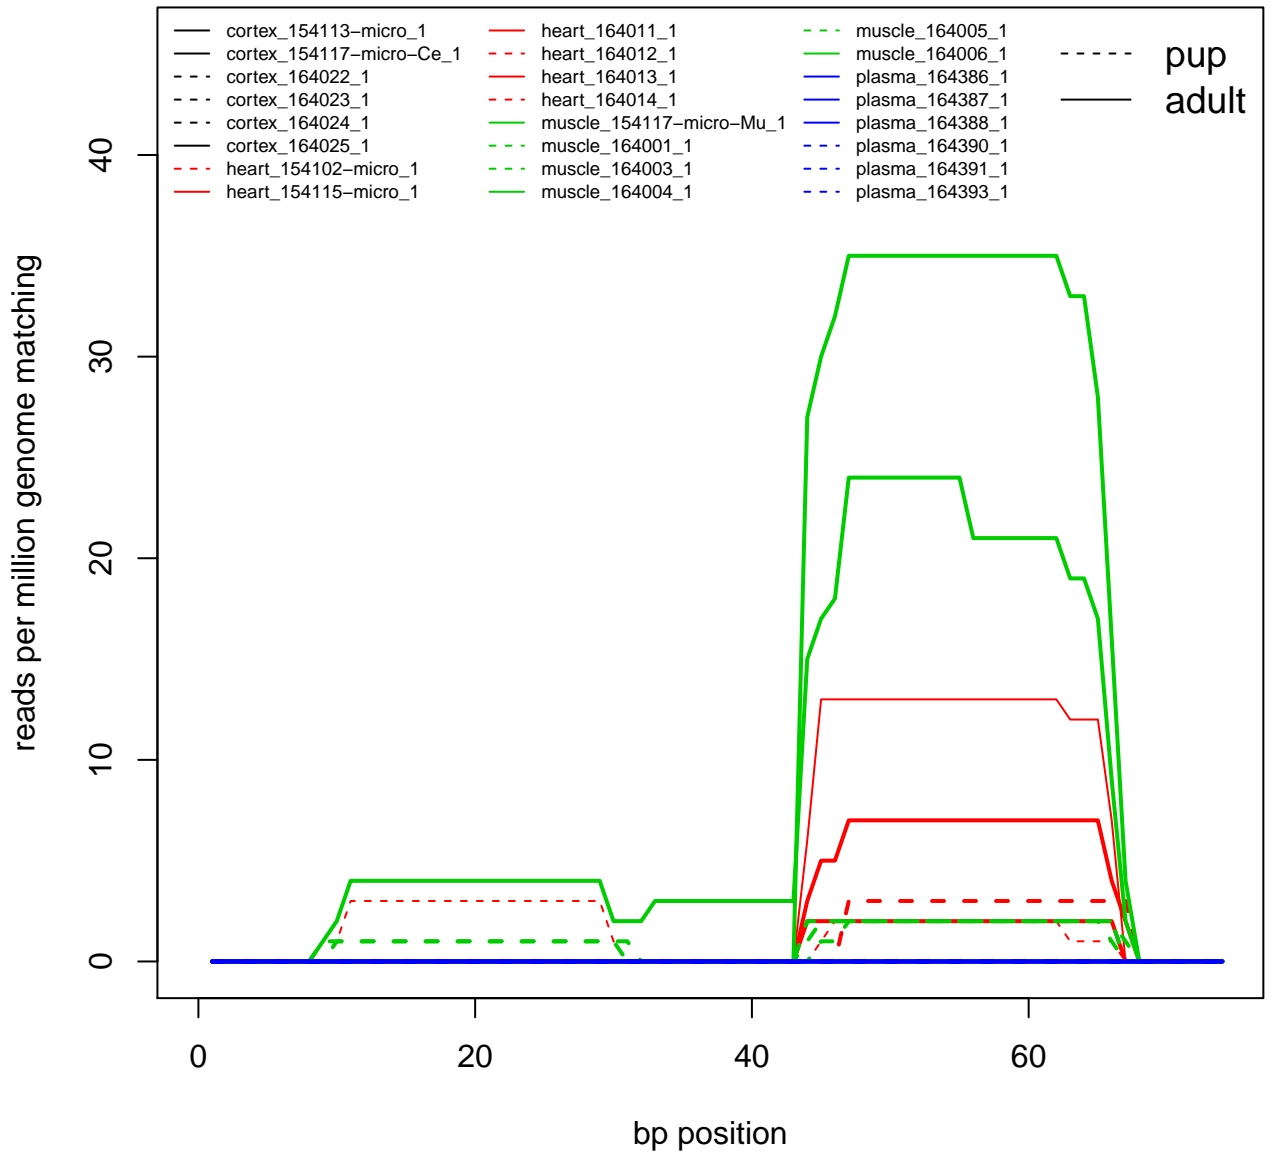

# lwe-miR-139\_loc1

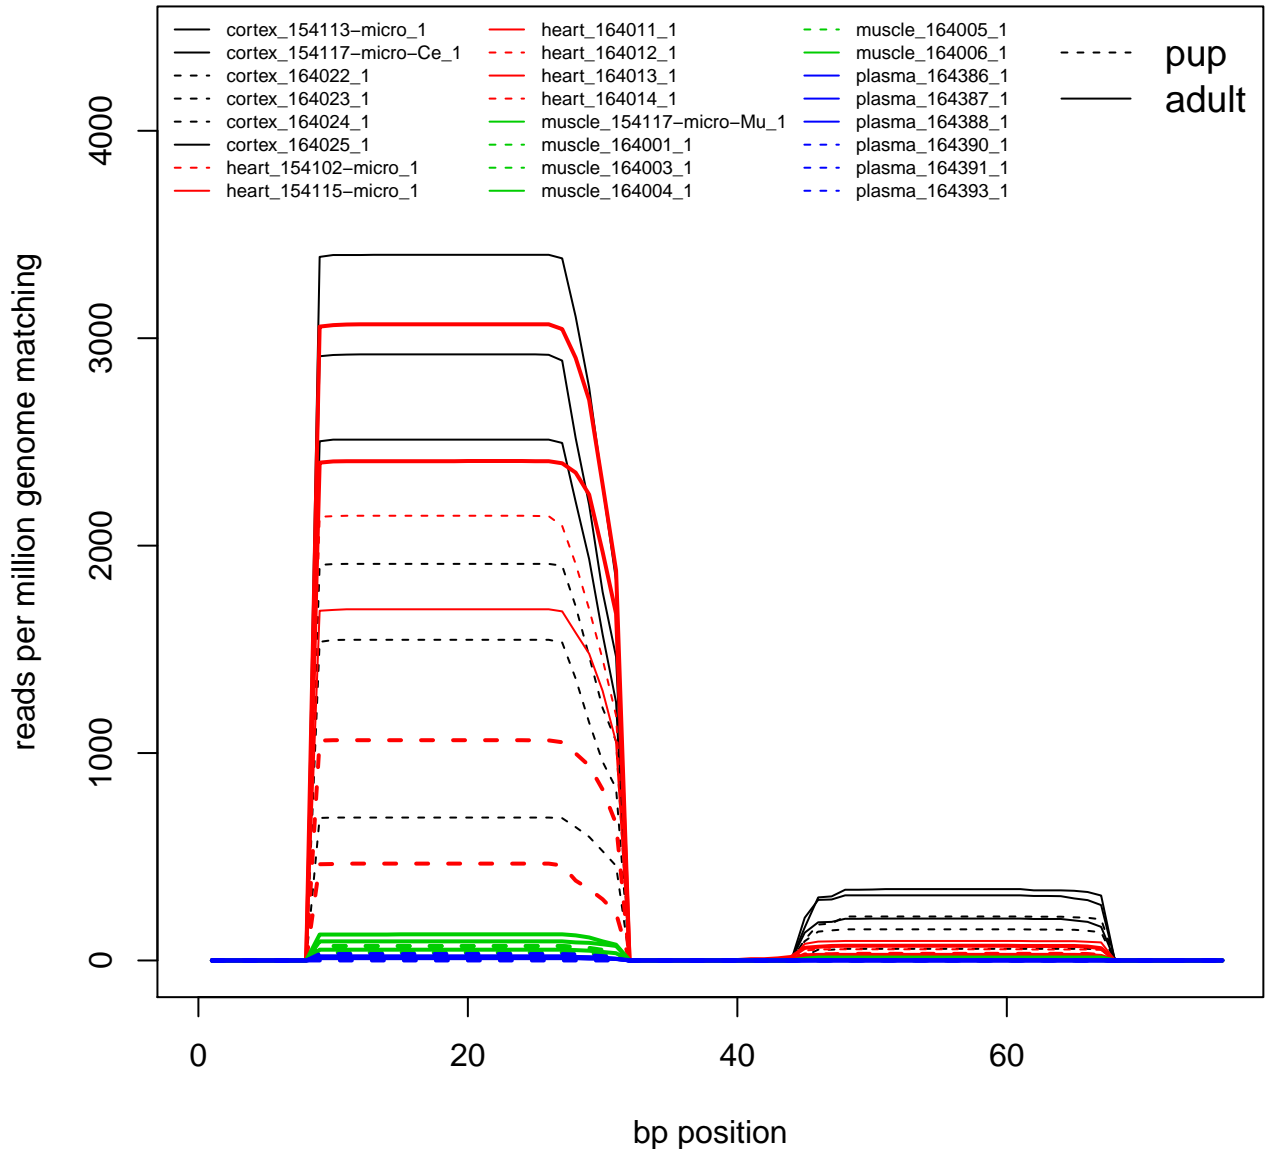

# lwe-miR-488\_loc1

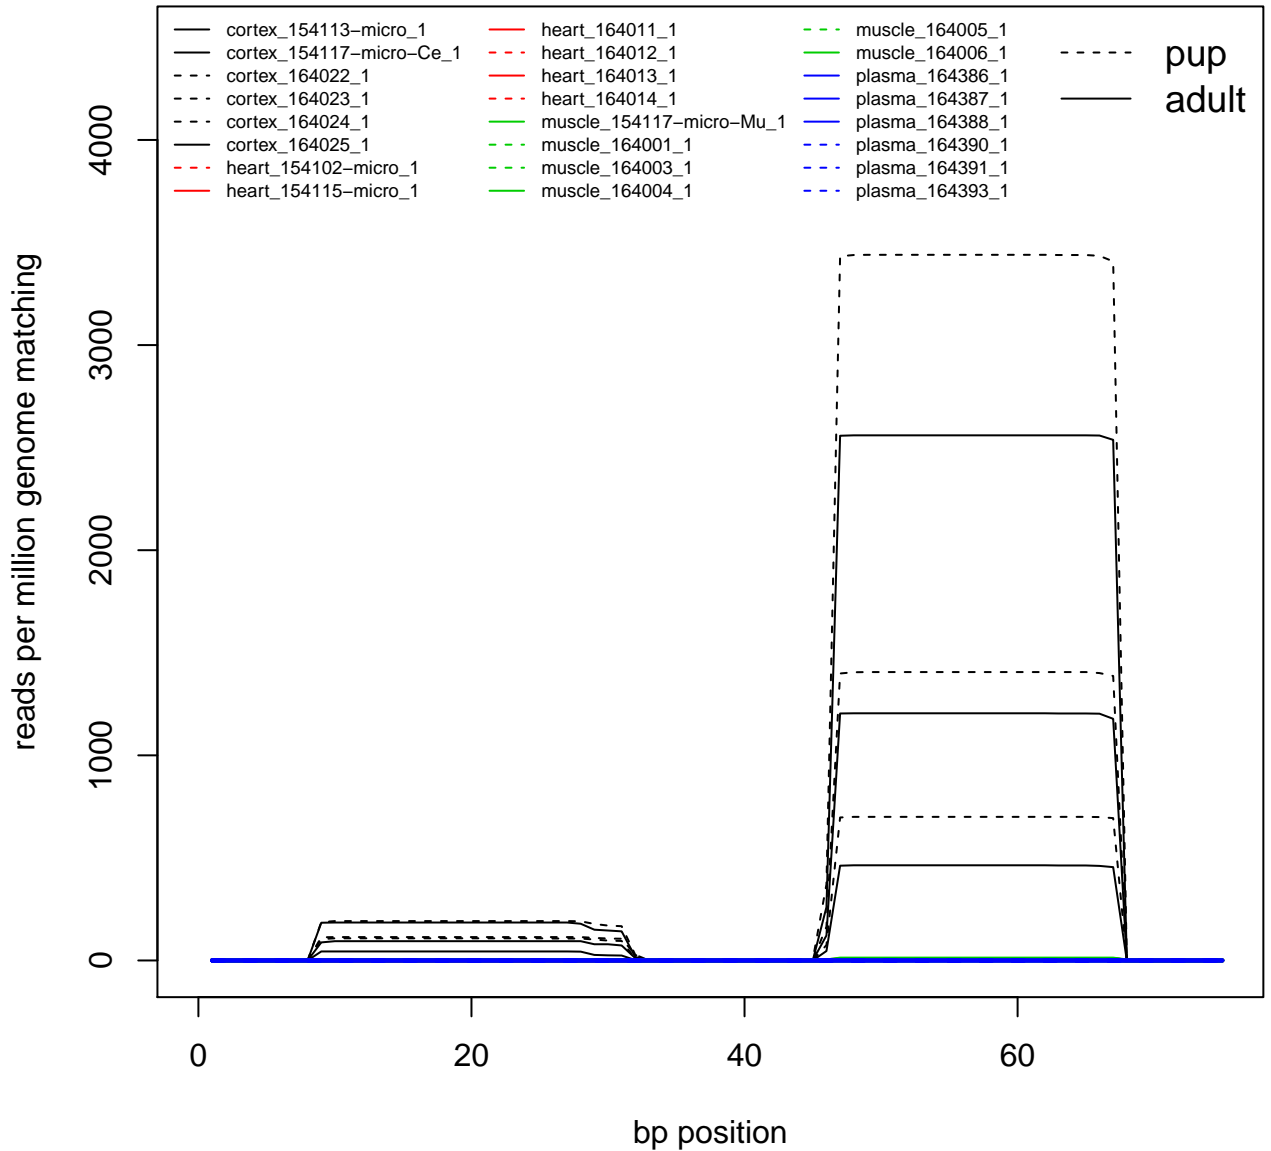

# lwe-miR-24a\_loc1

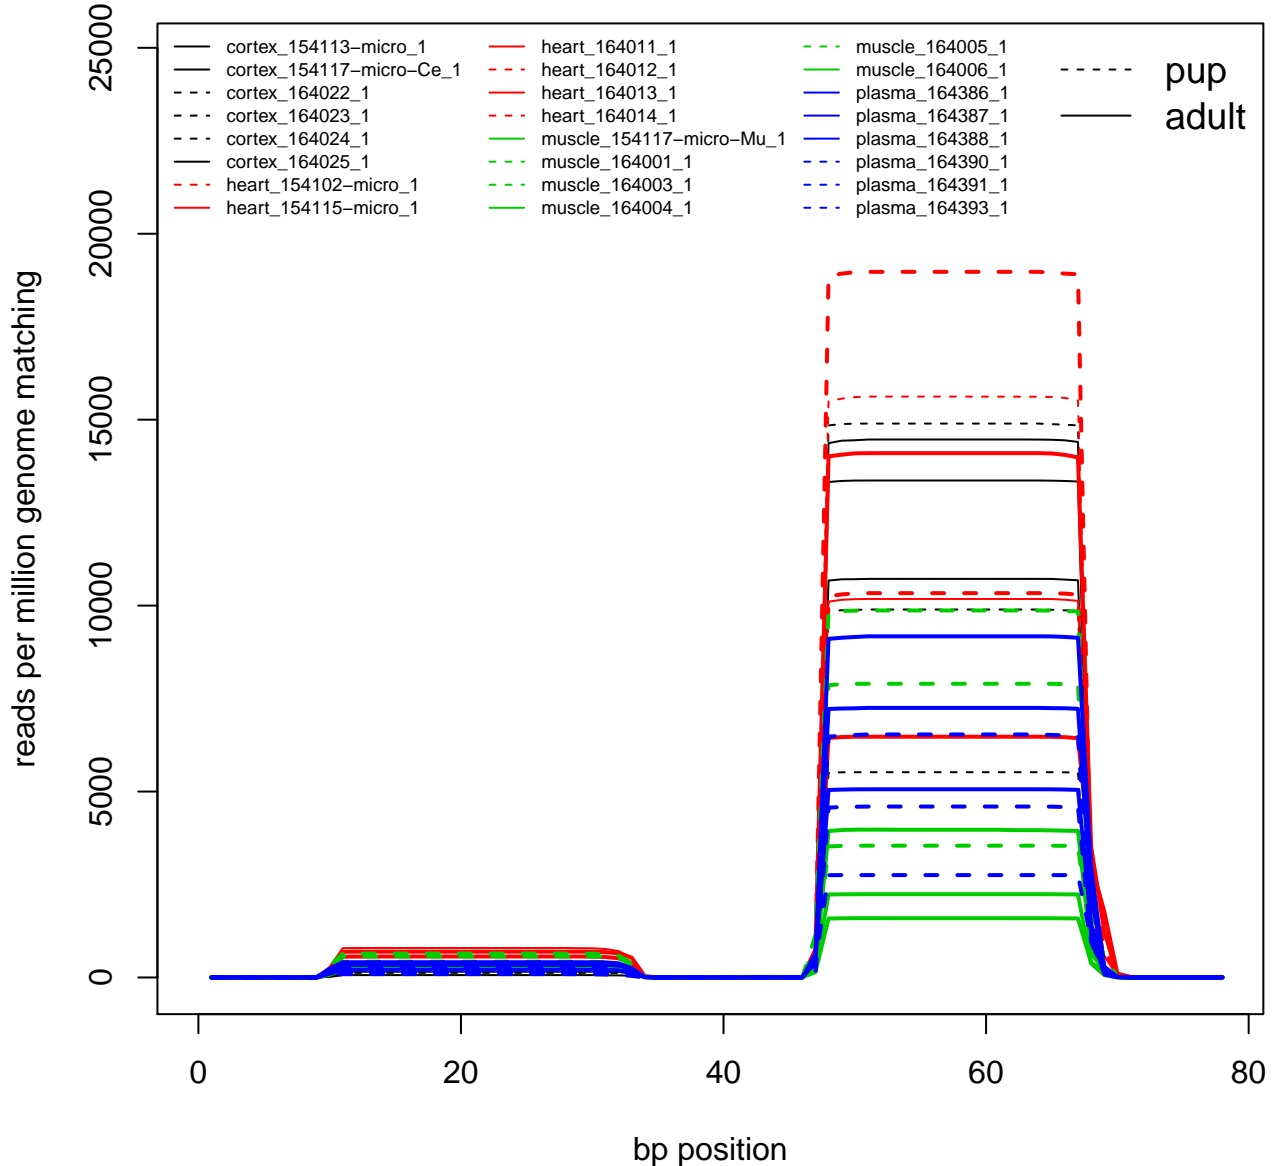

# lwe-miR-27a\_loc1

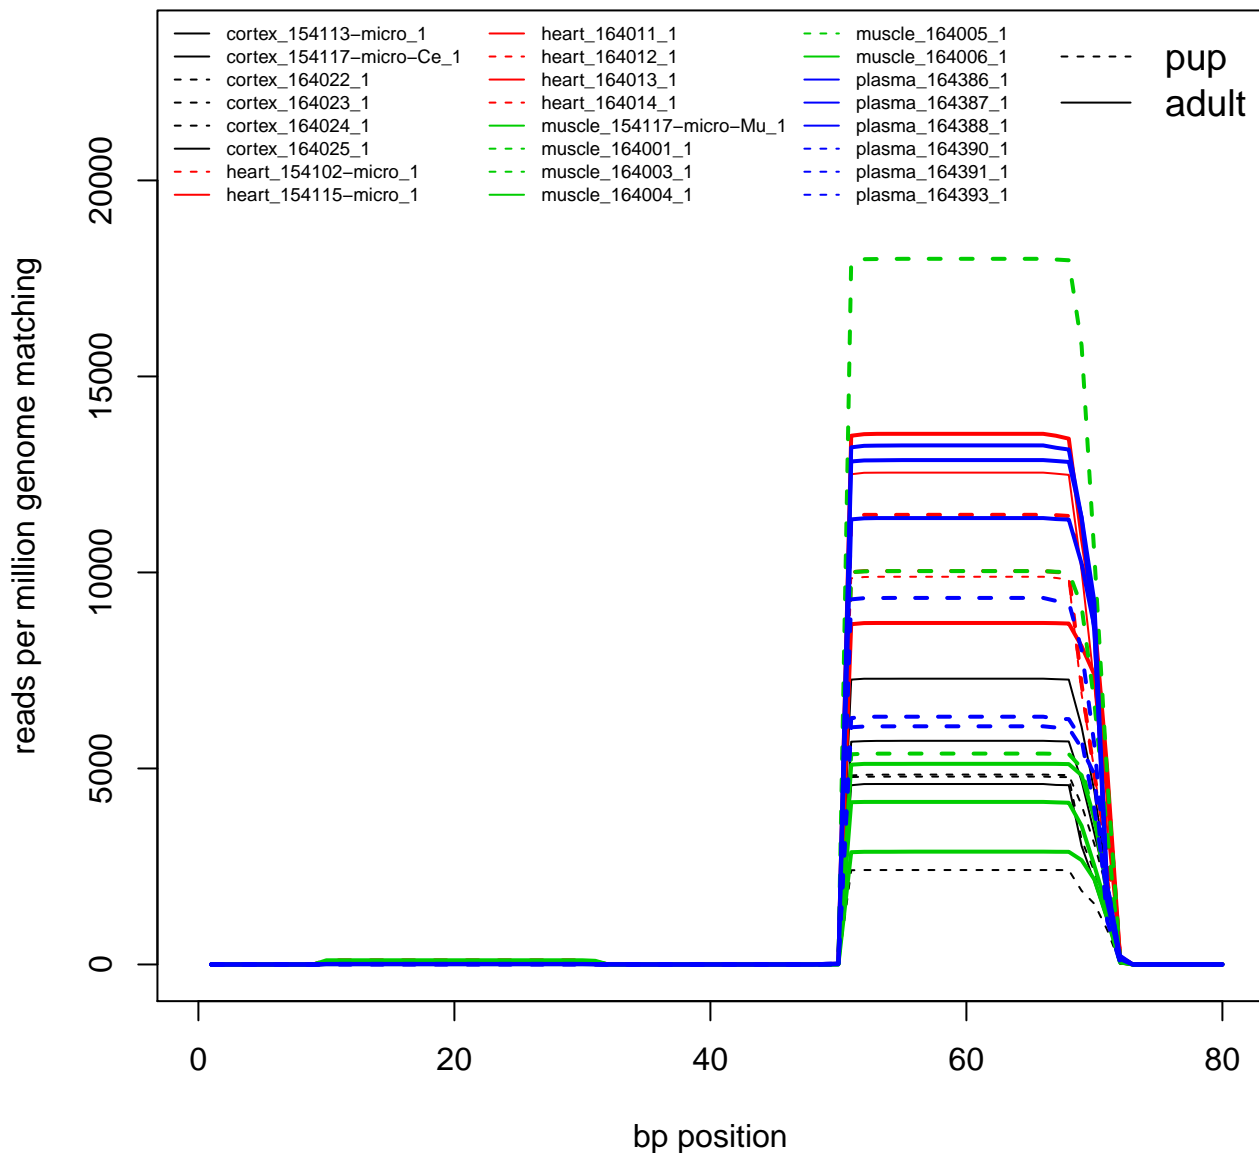



# lwe-miR-23a\_loc1

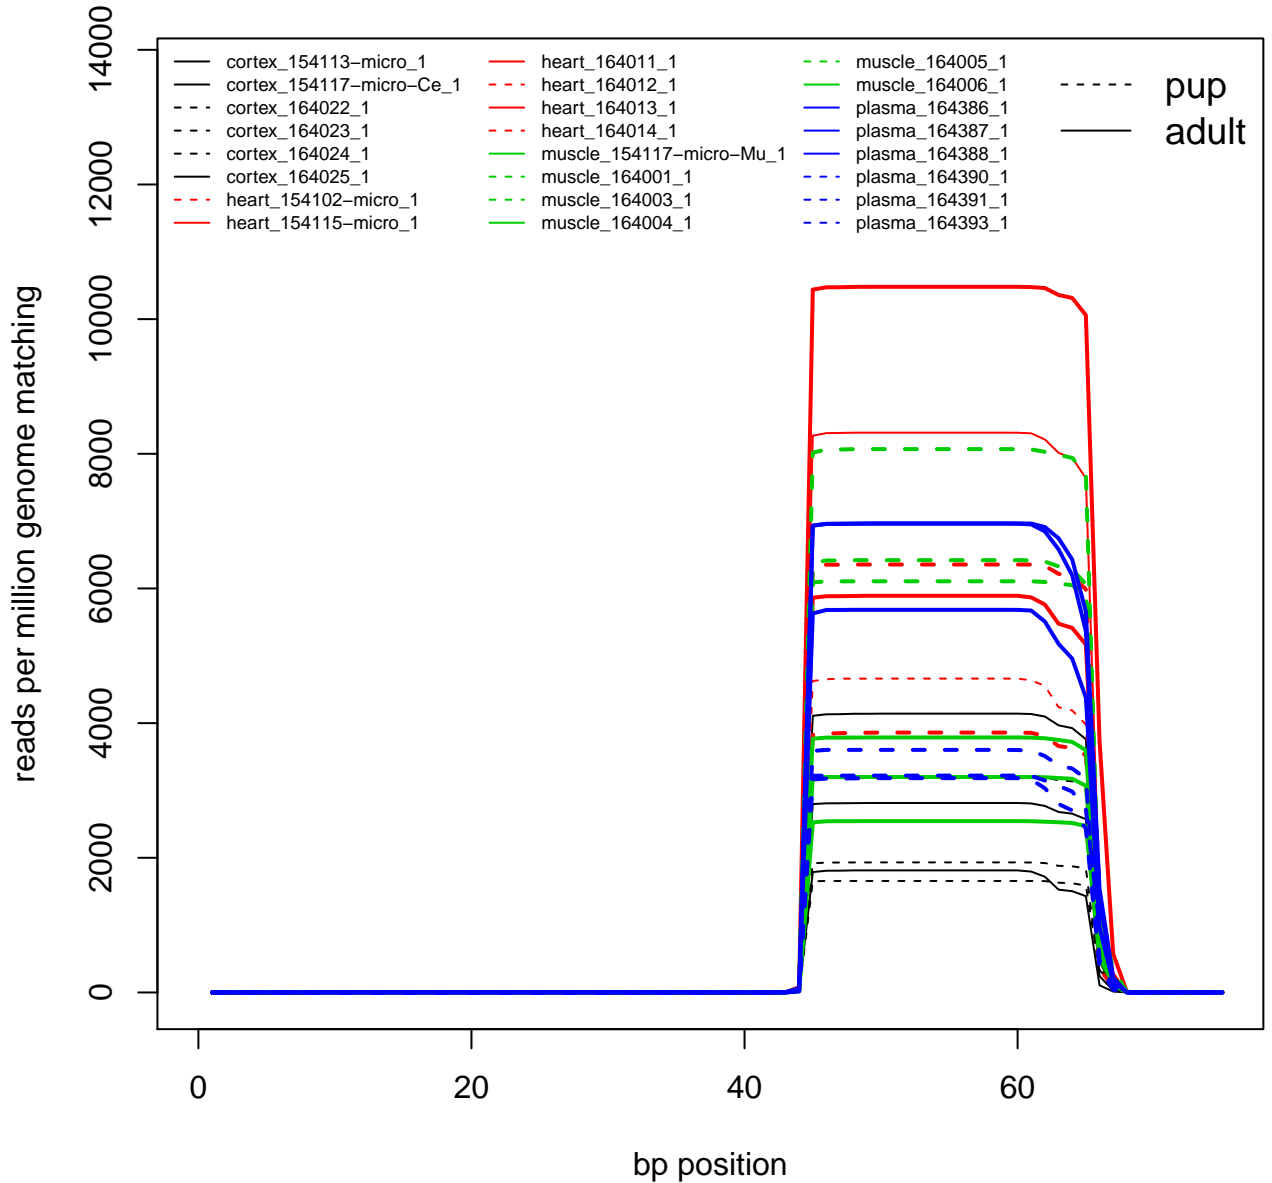

# lwe-miR-153a\_loc1

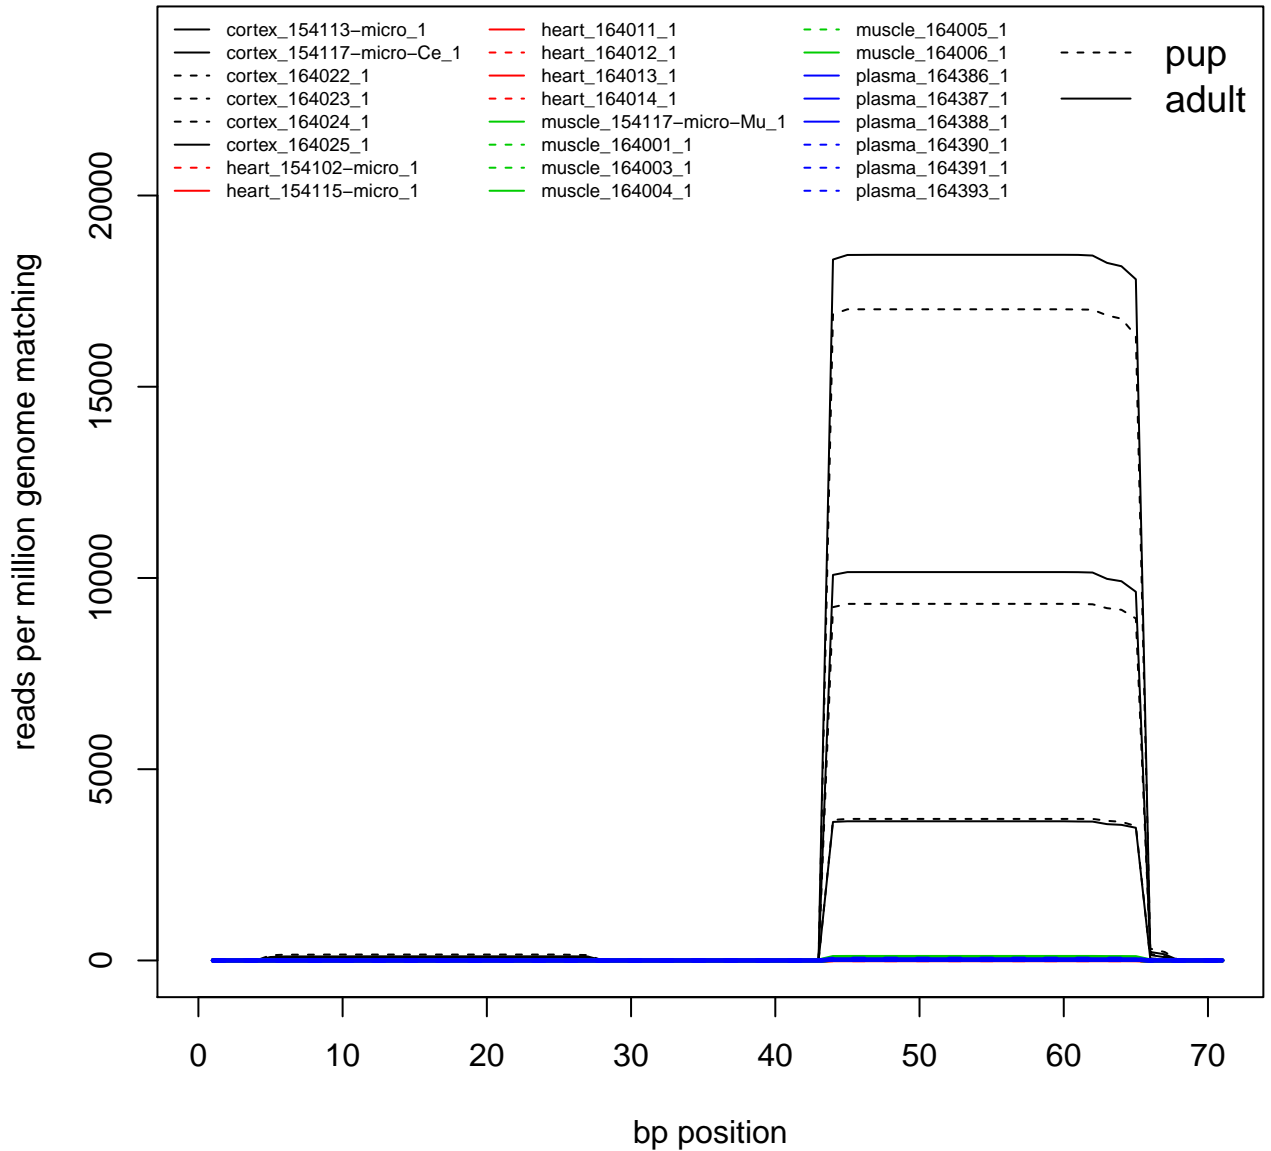



# novel\_14

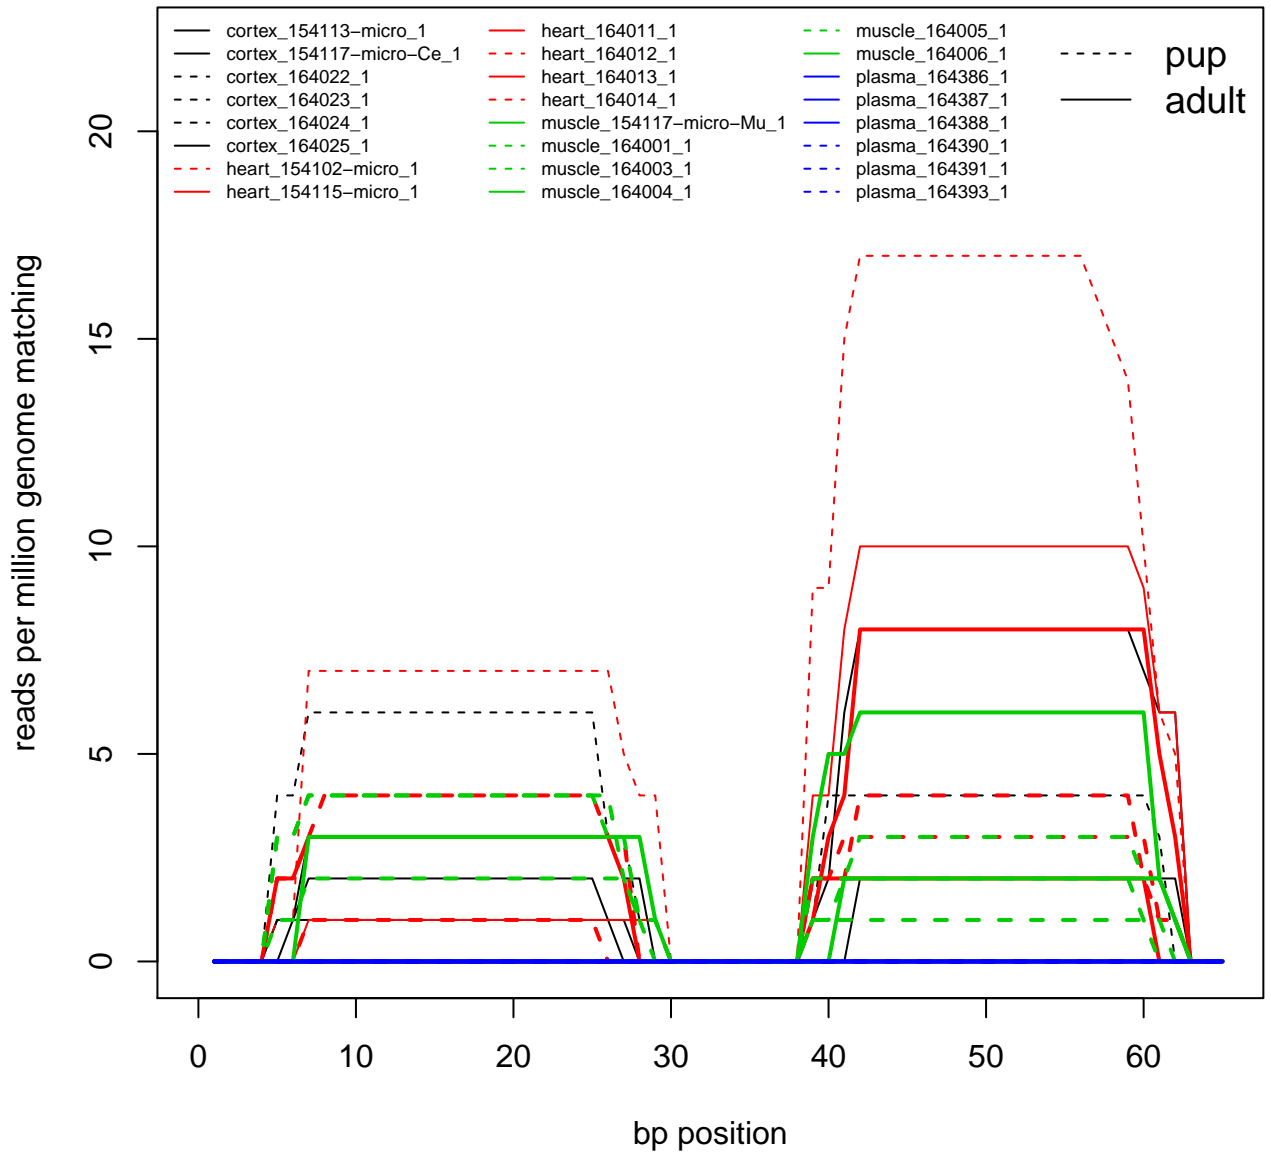

# novel\_16

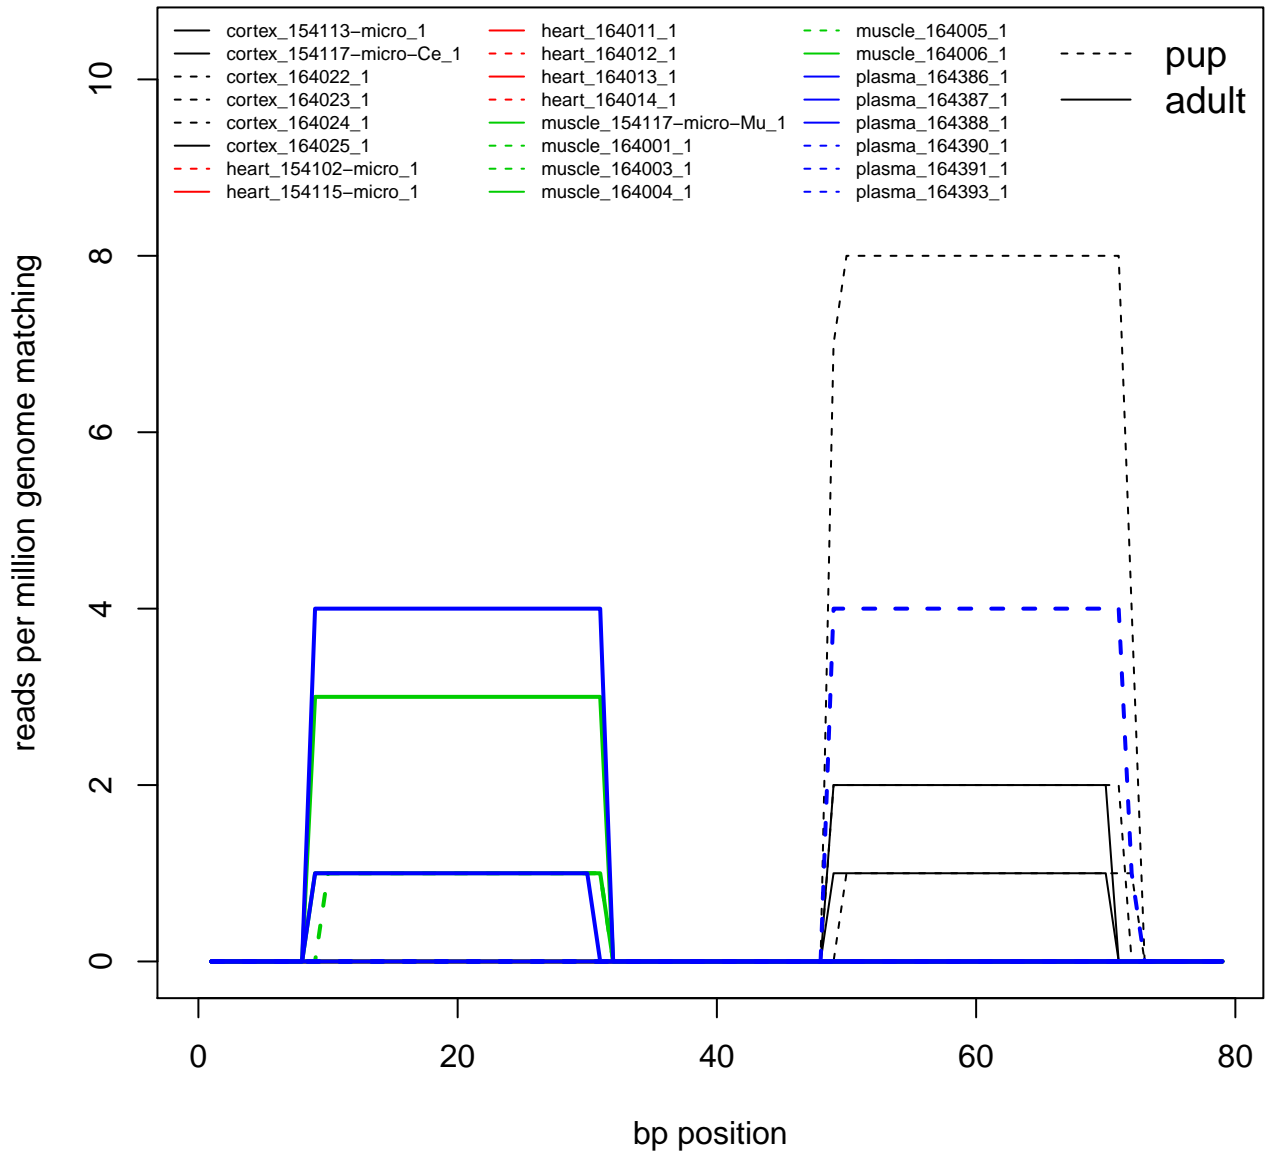



# lwe-miR-196b\_loc1

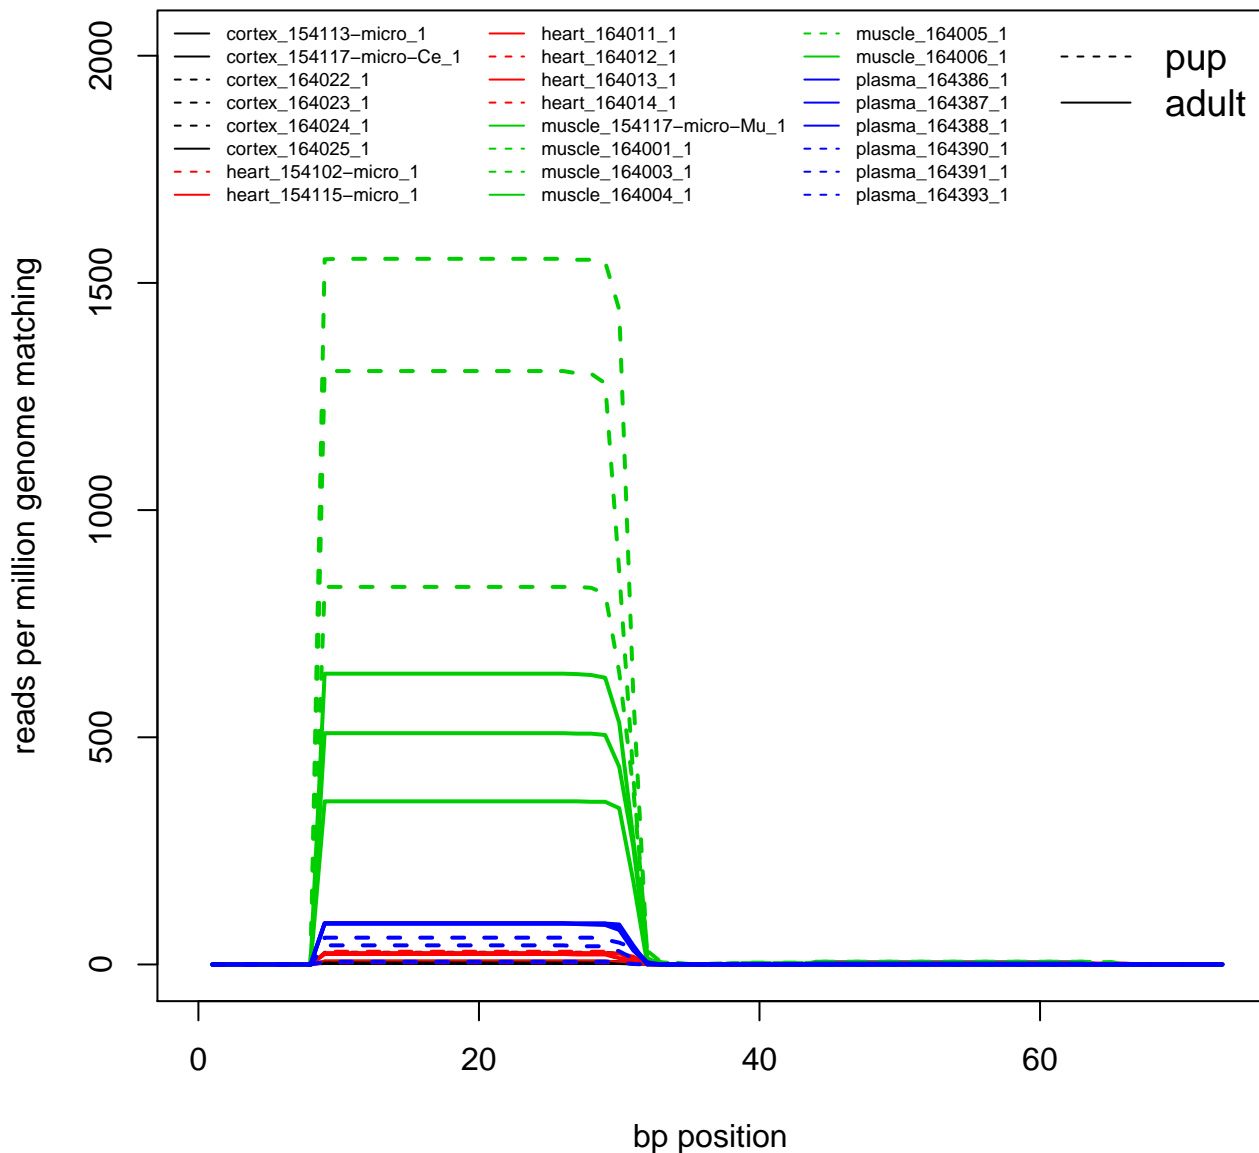

# novel\_18

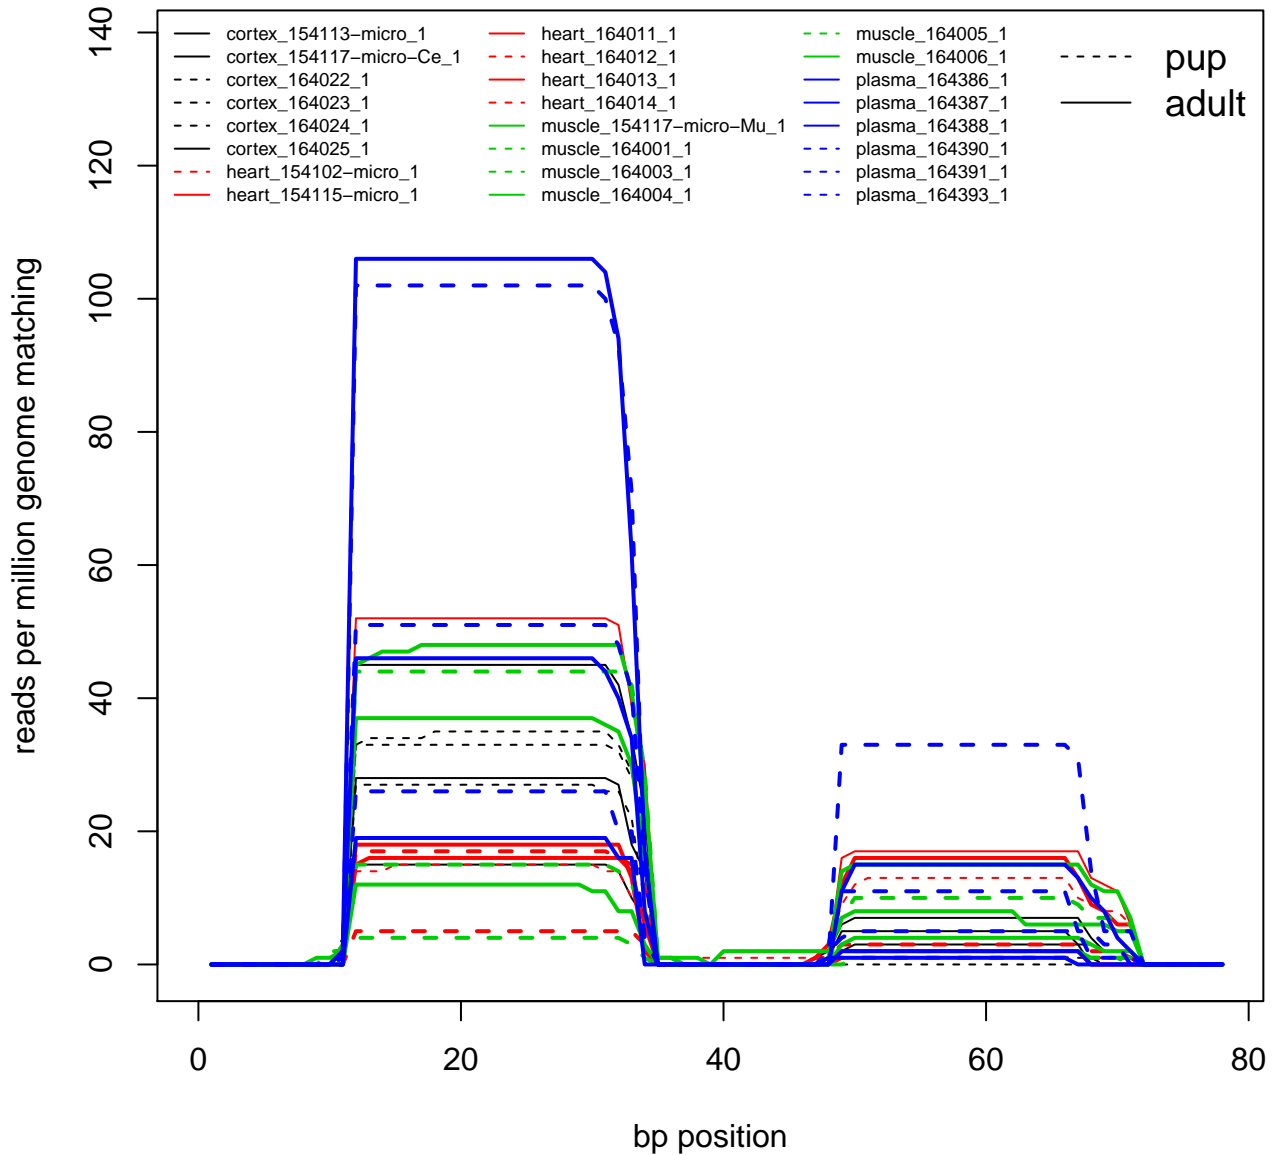



# novel\_19

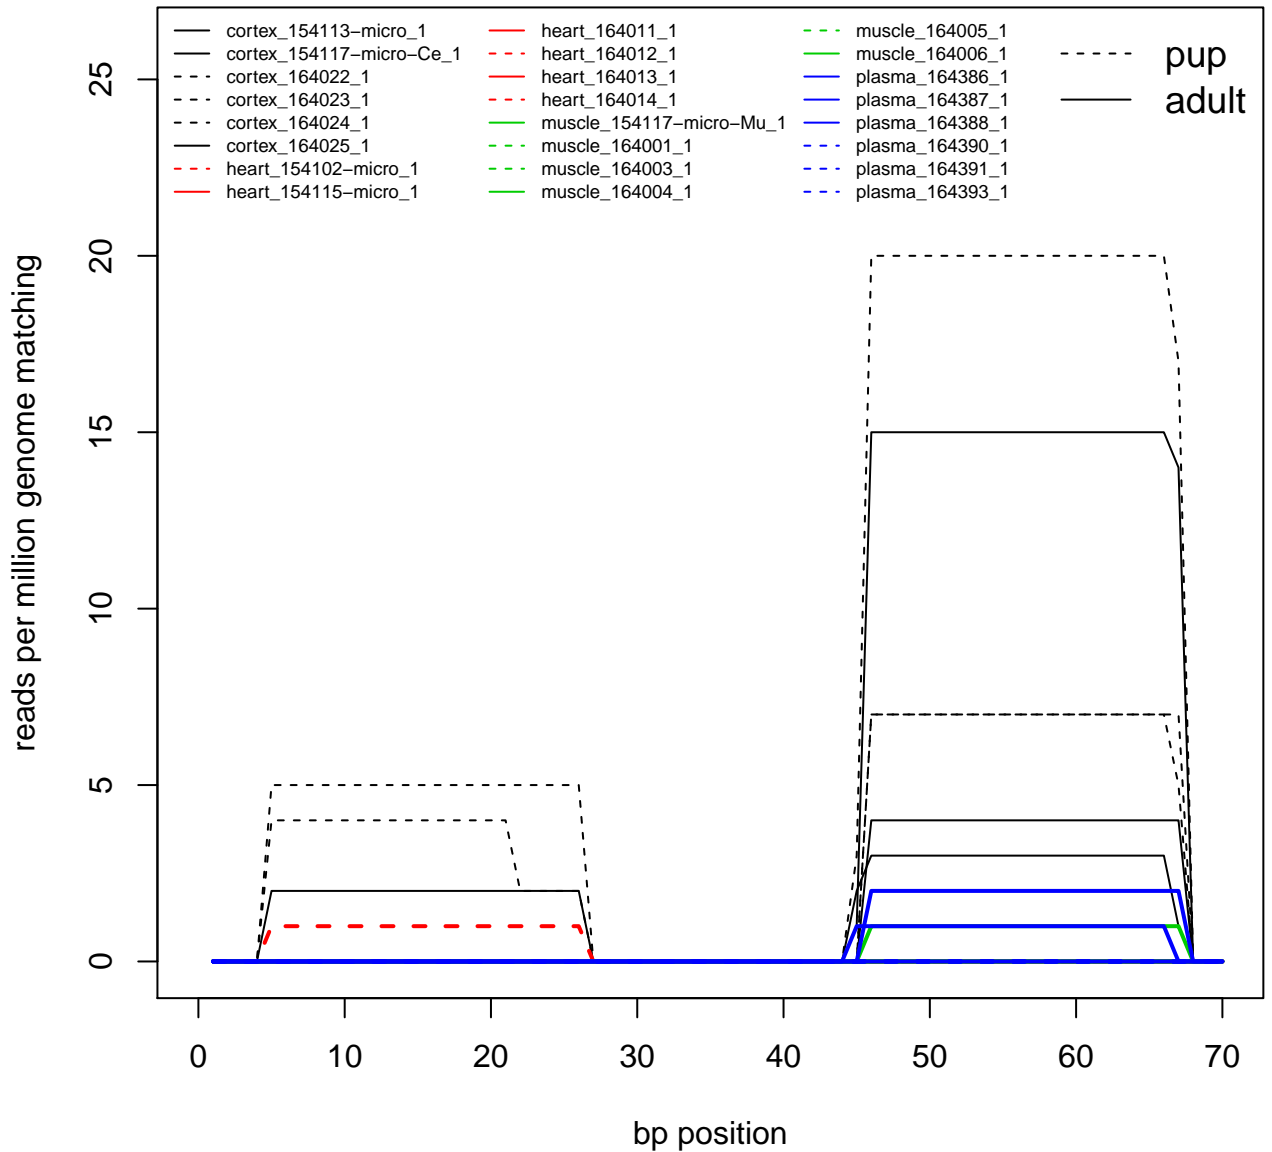

# novel\_20

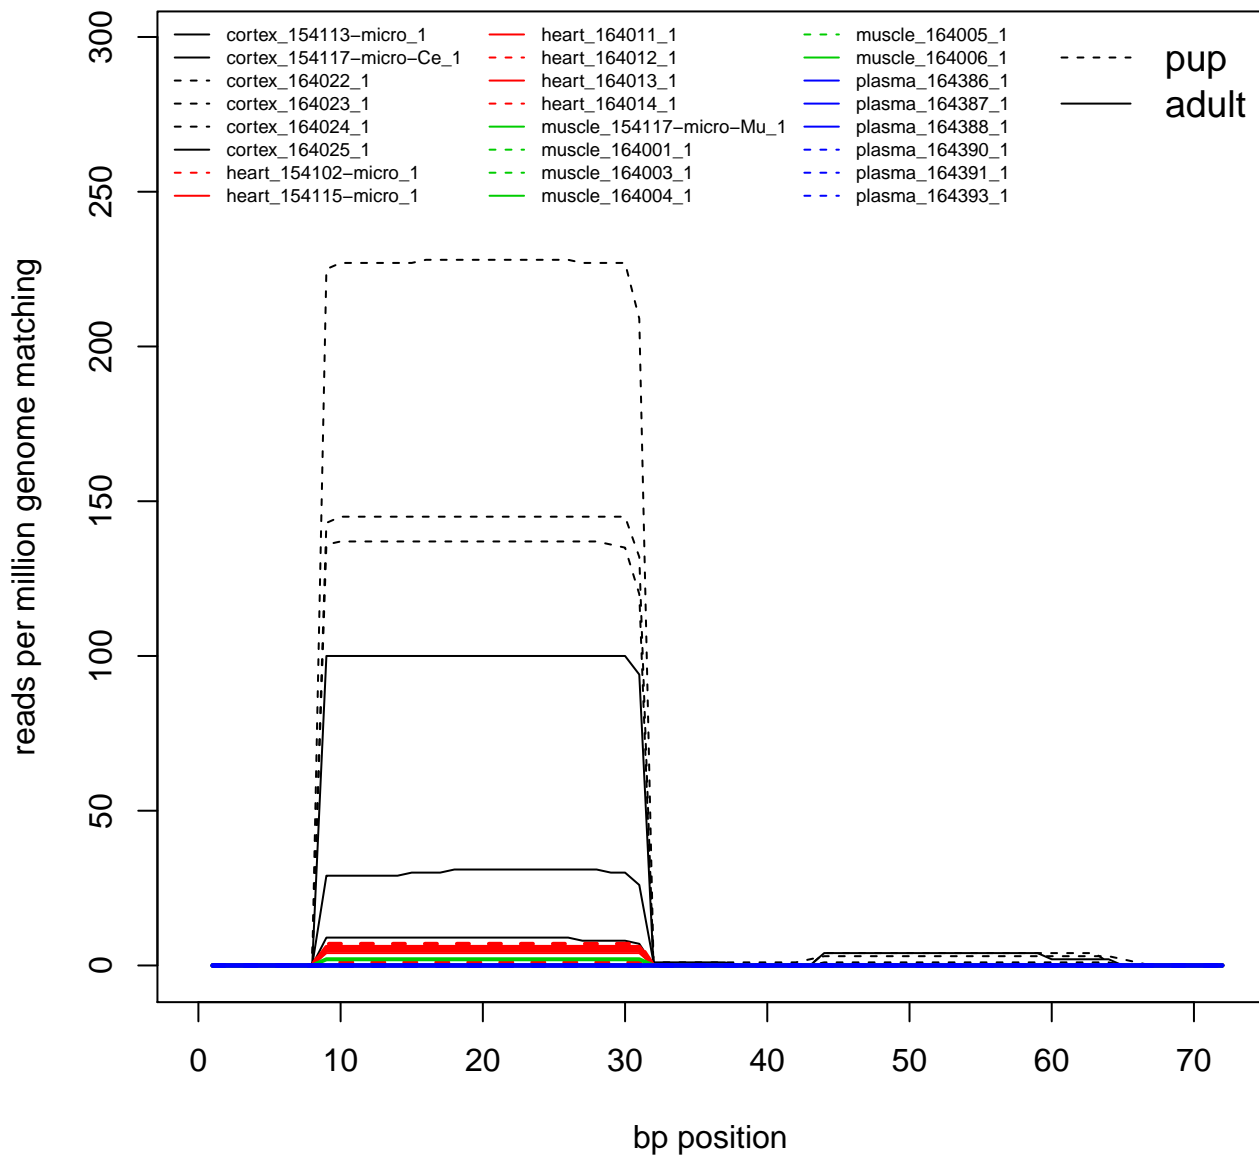

# lwe-miR-135\_loc1

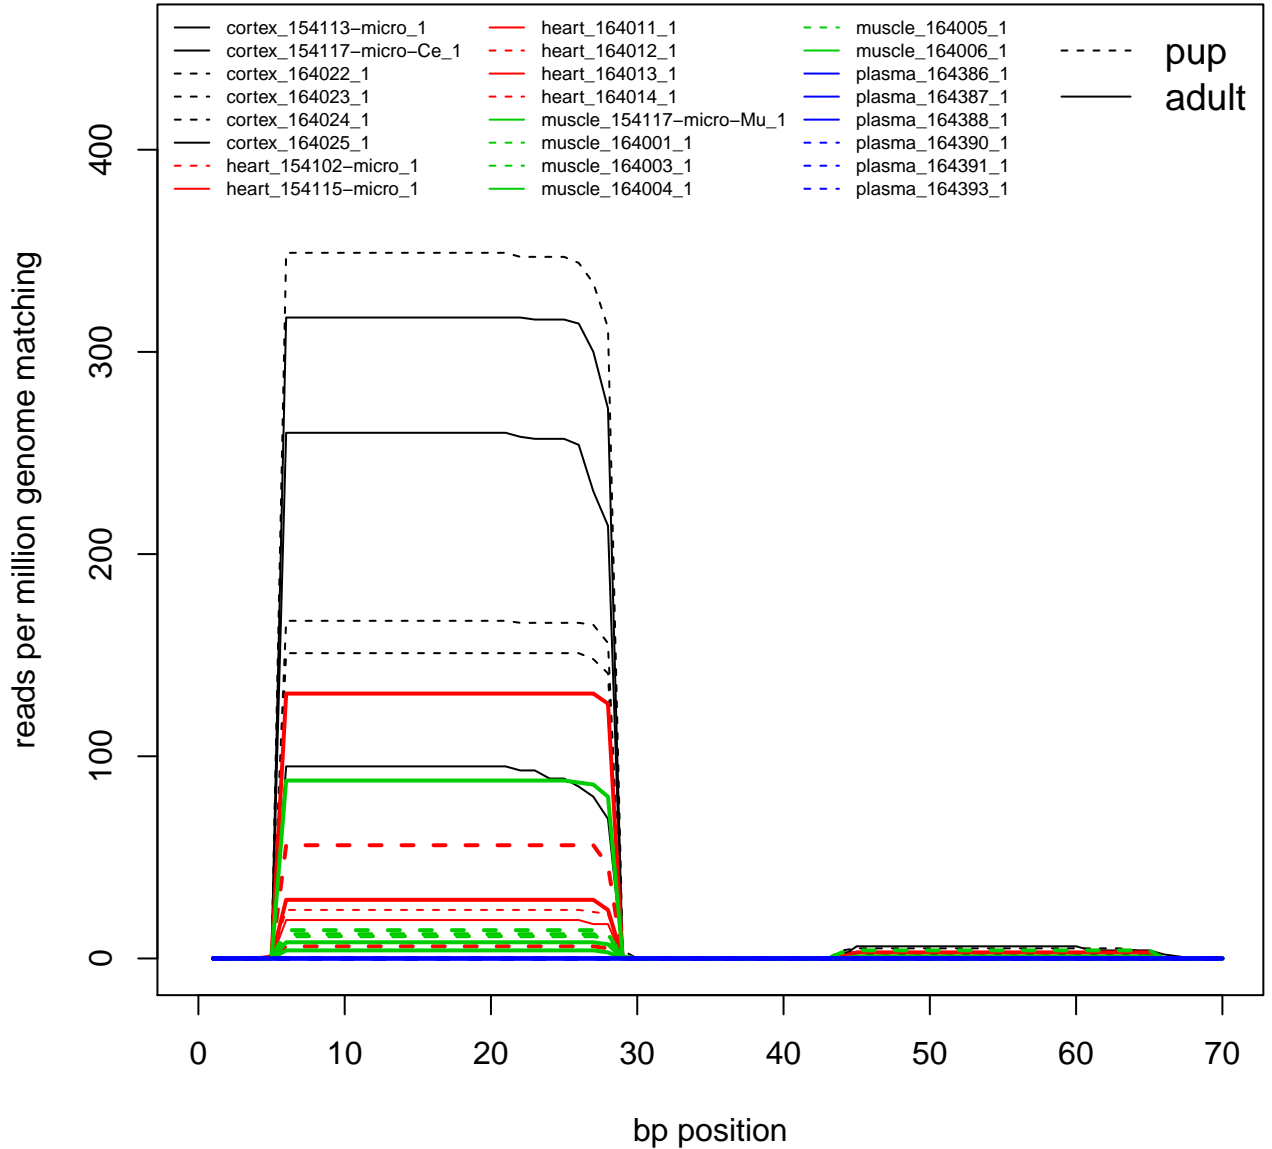

# let-7g\_loc1

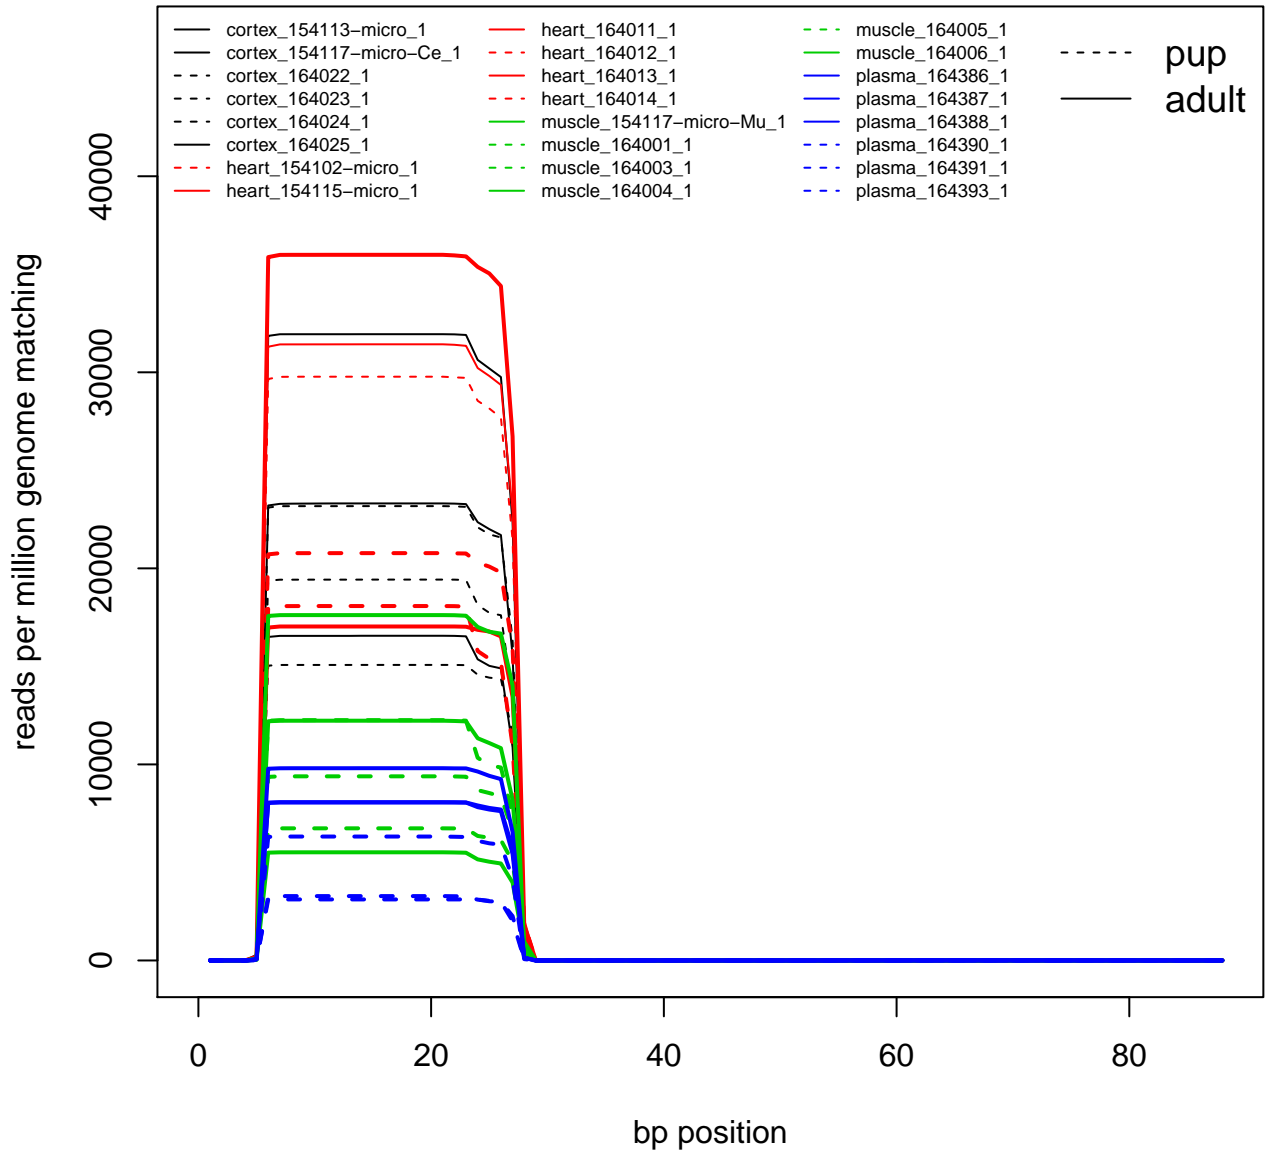

# novel\_21

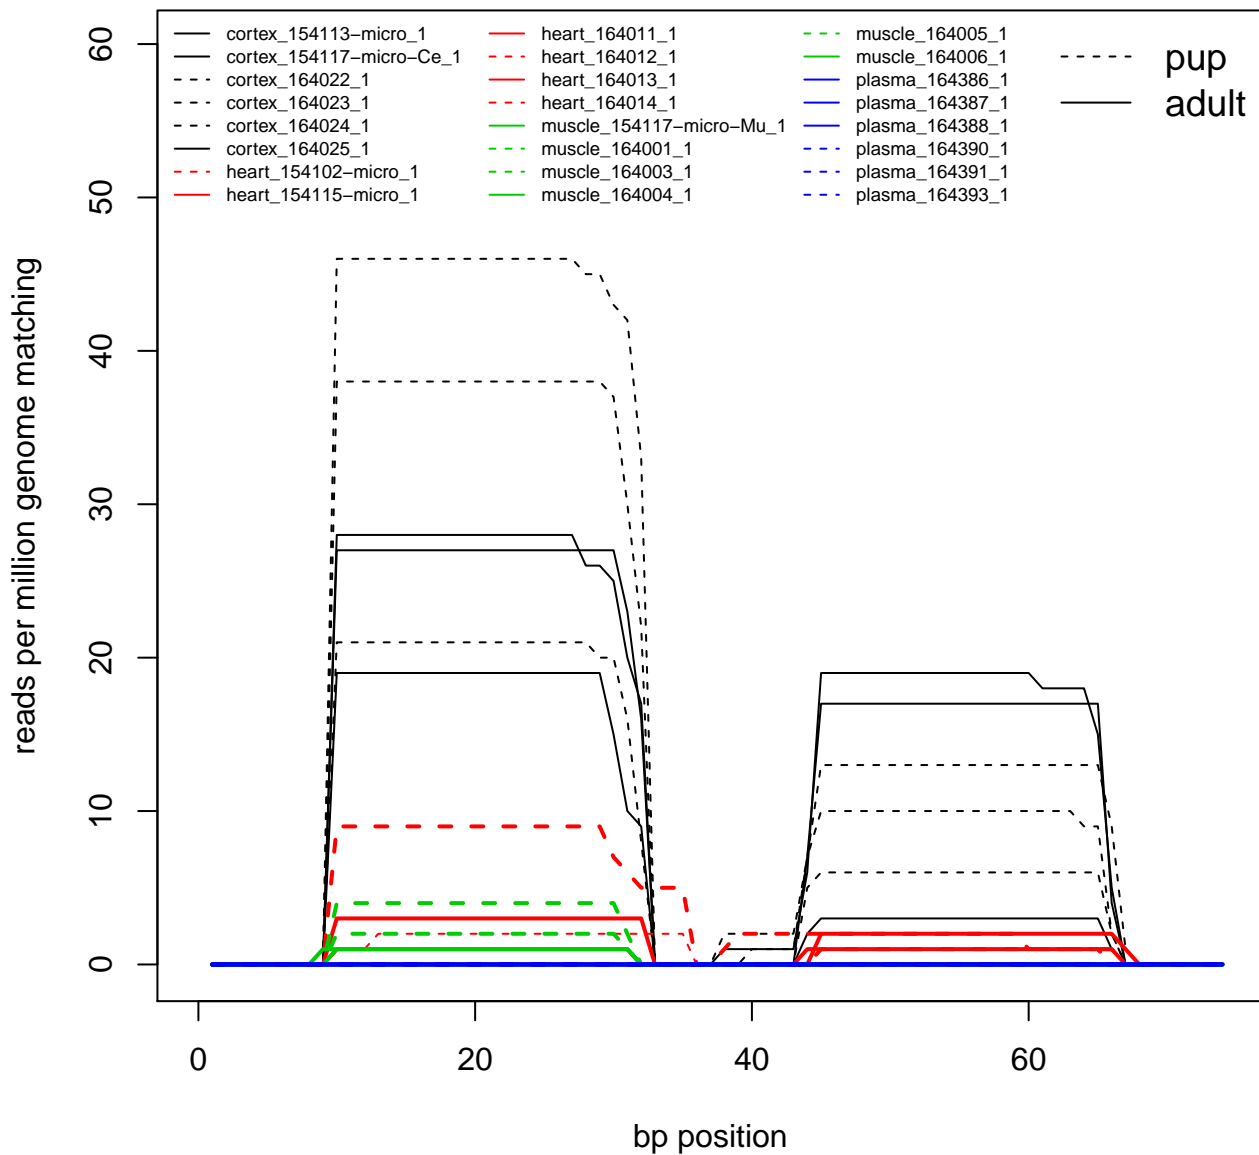

# novel\_22

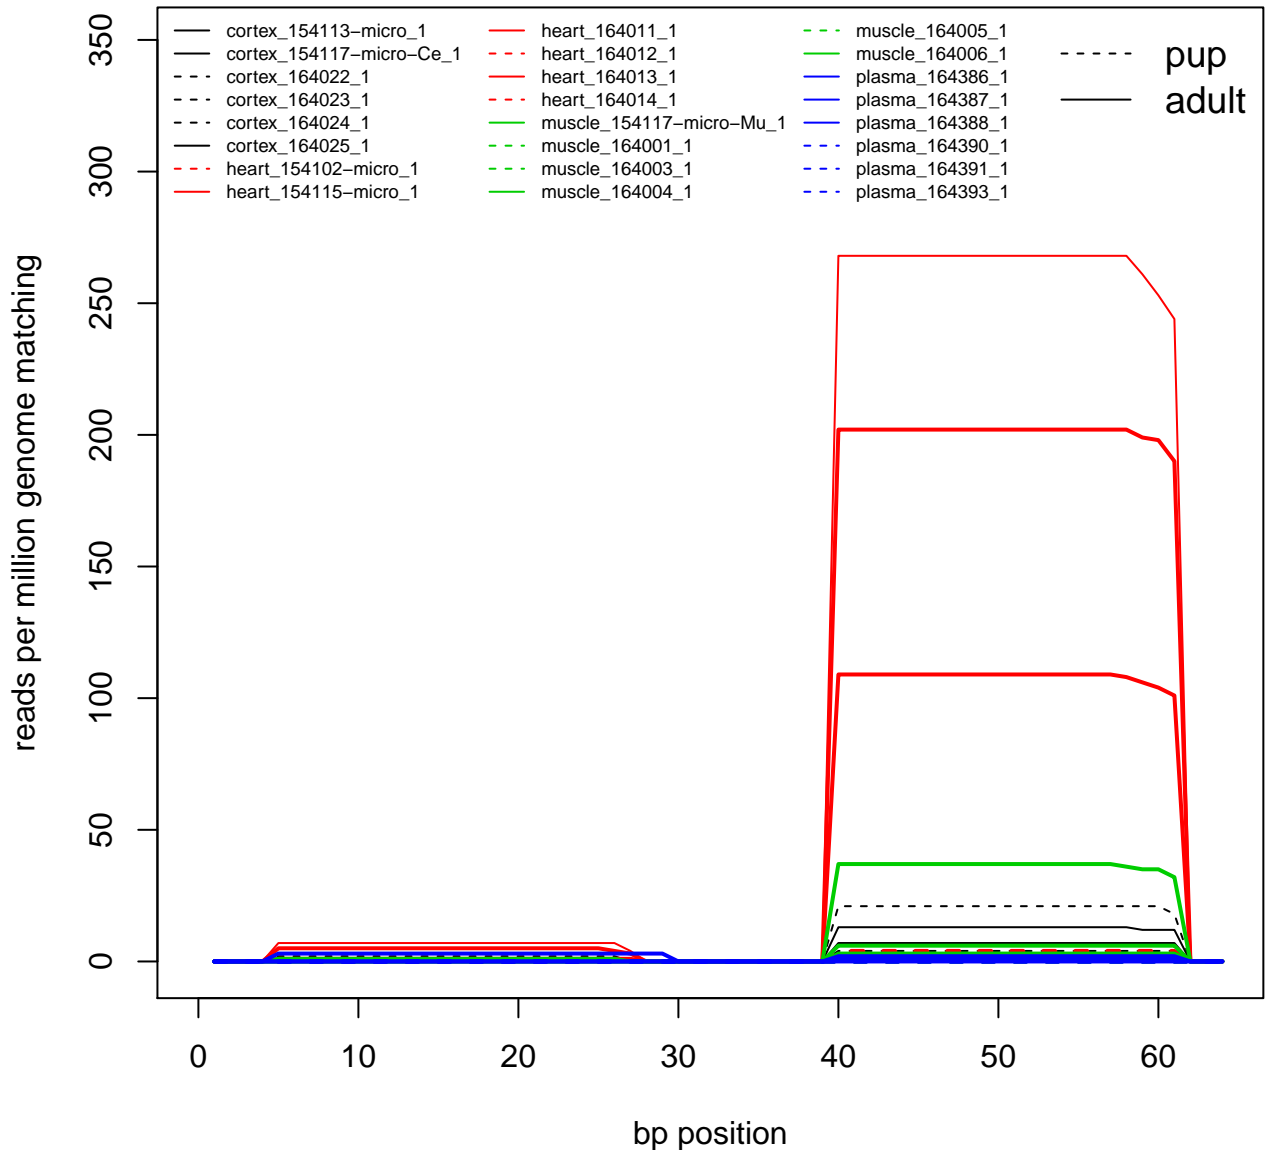

# novel\_23

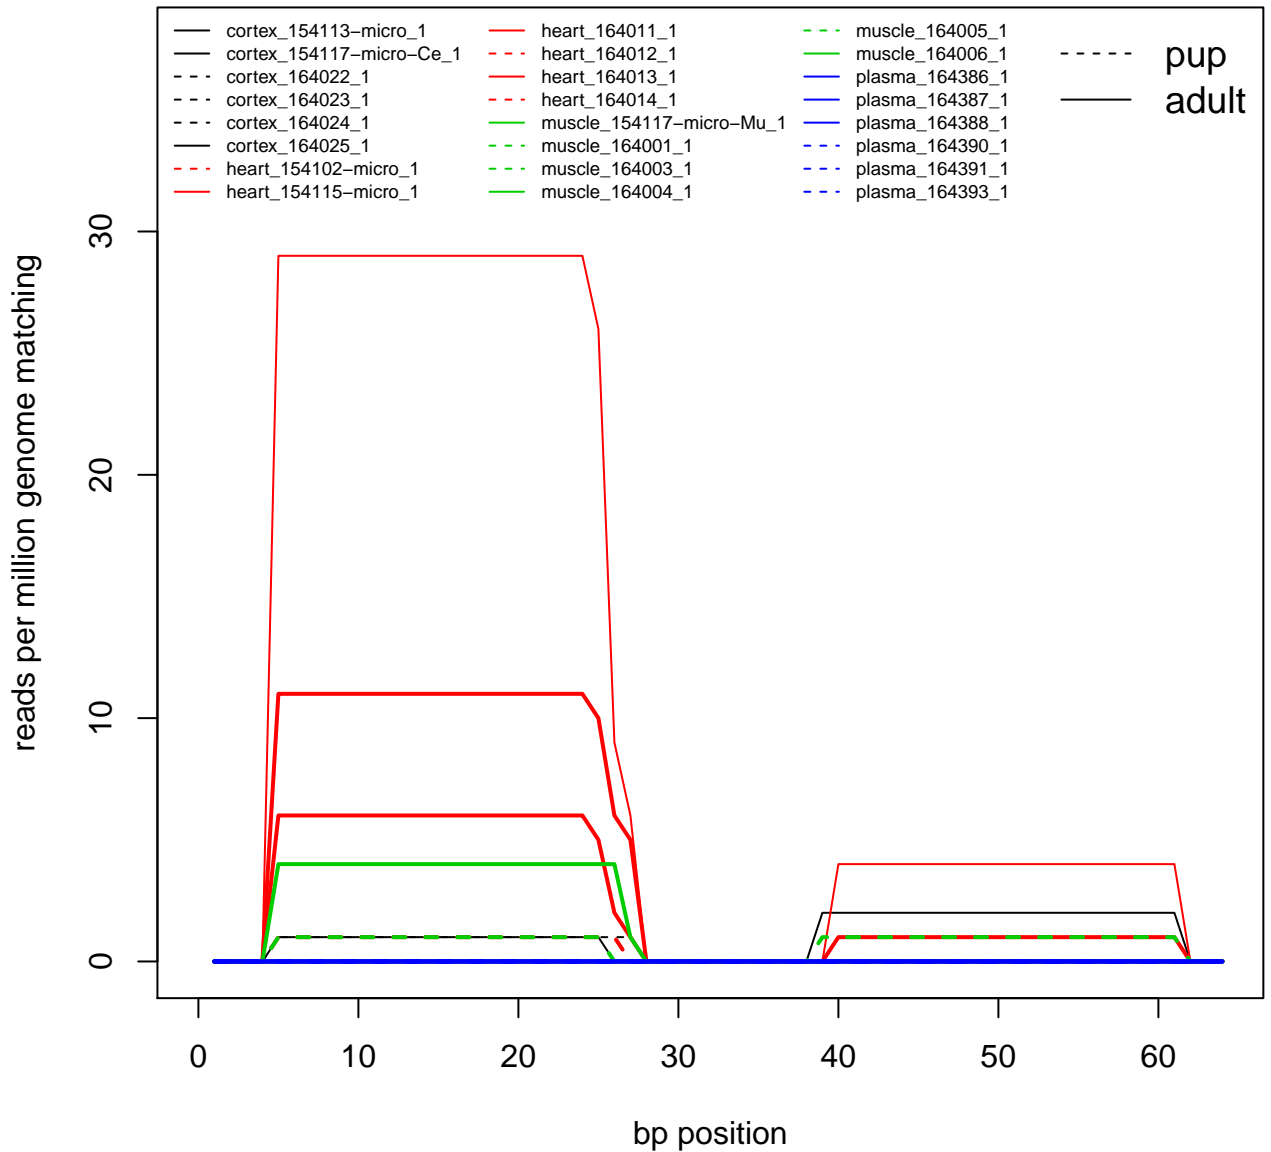





# lwe-miR-628a\_loc1

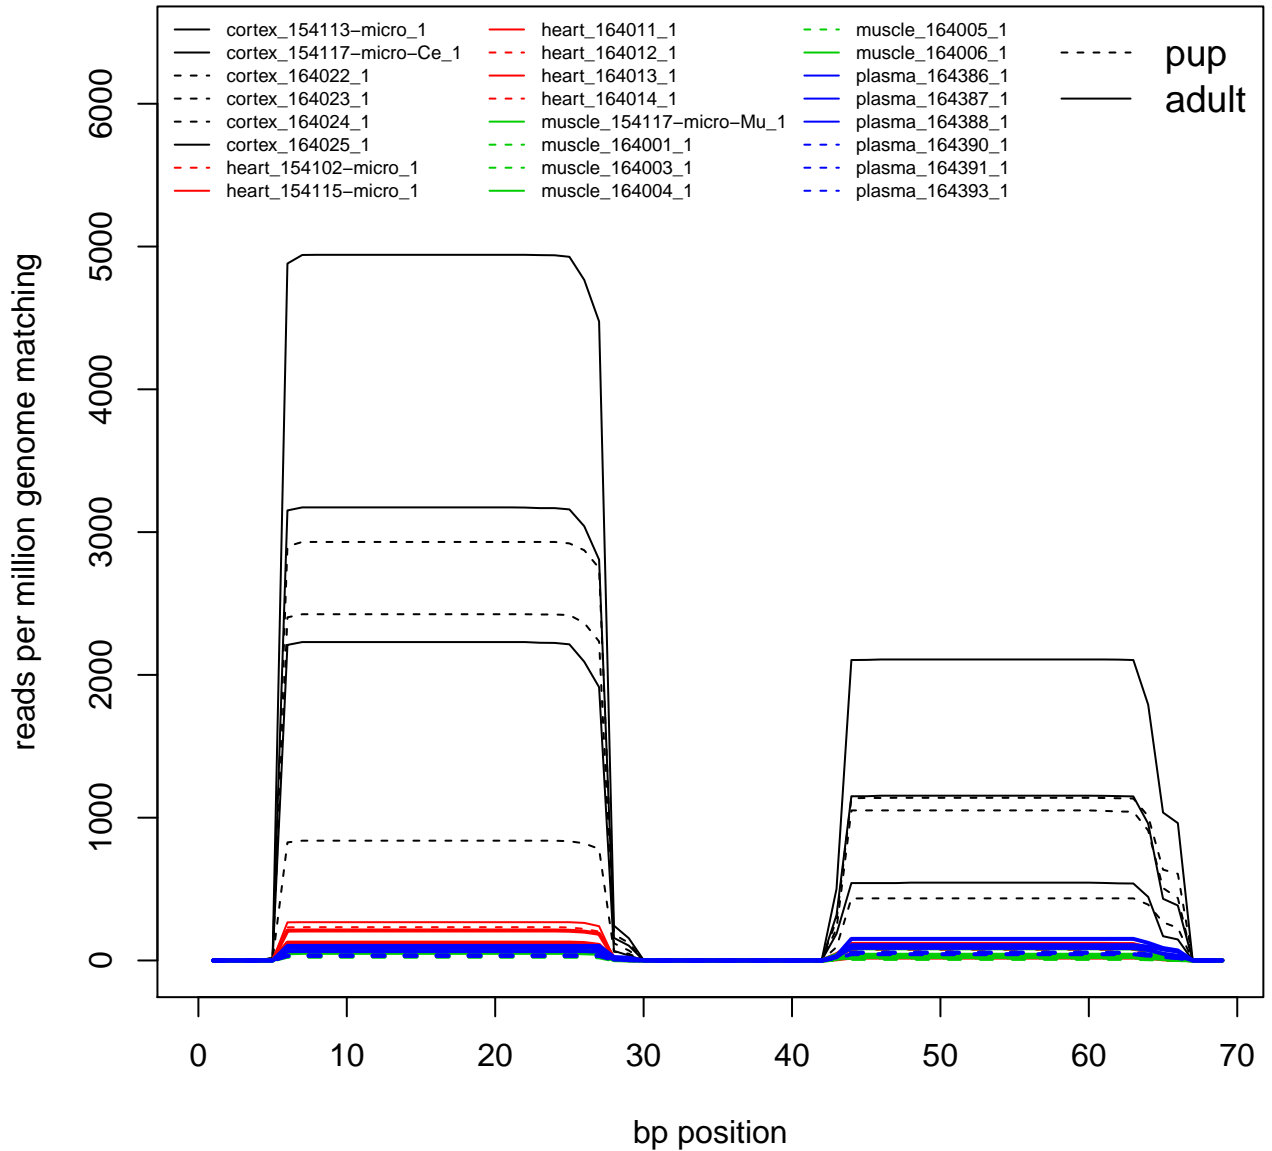

# novel\_25

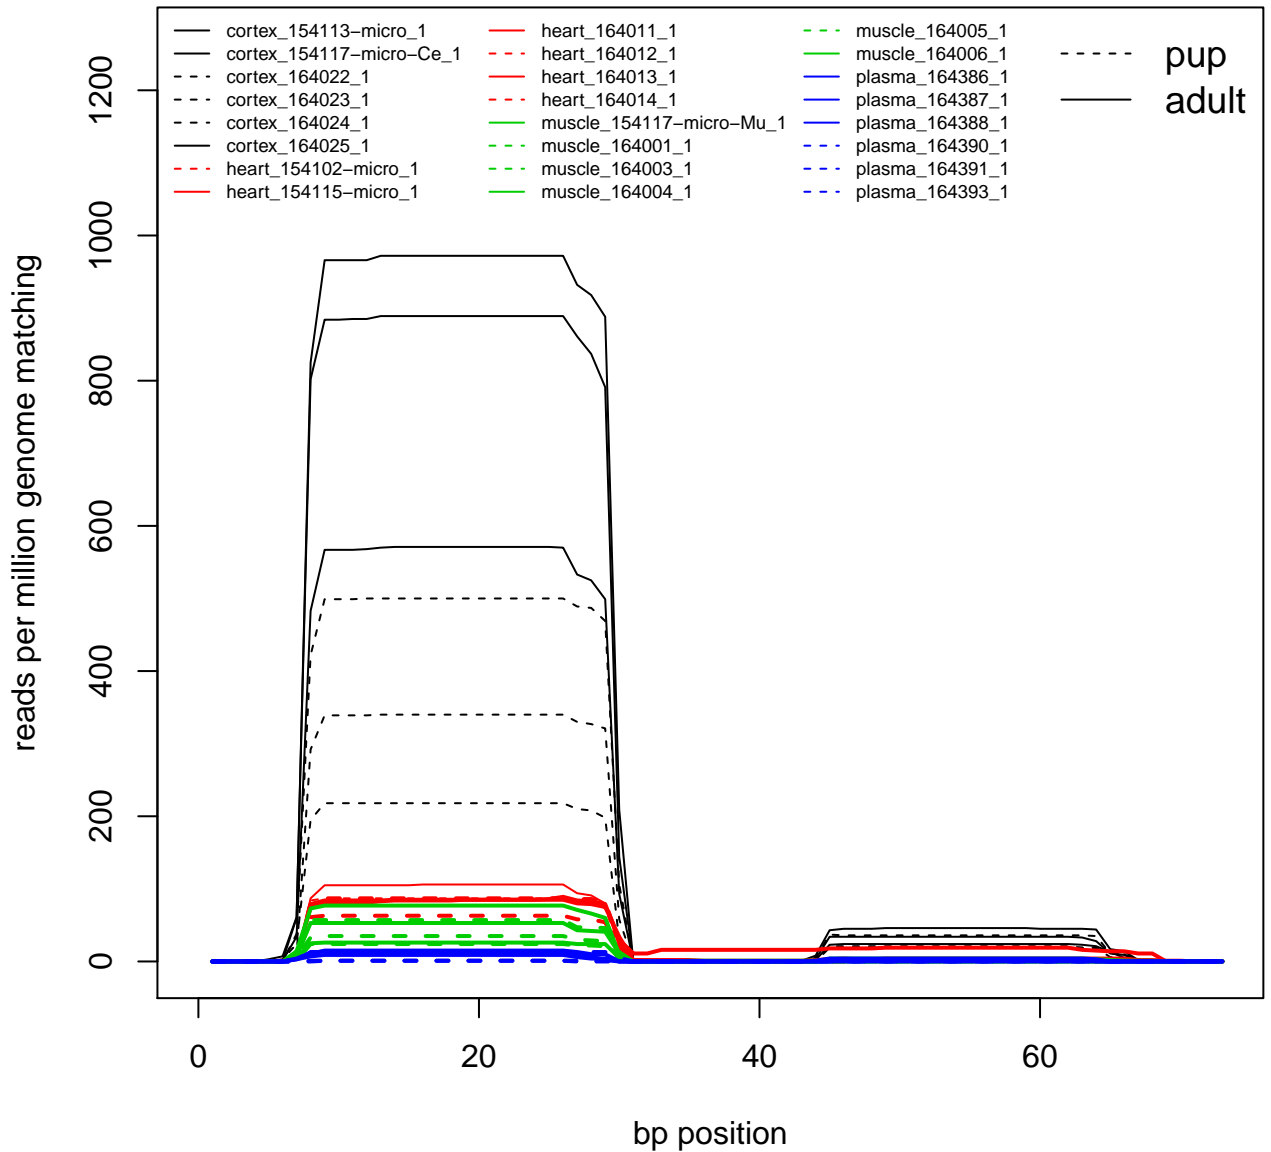

# novel\_26

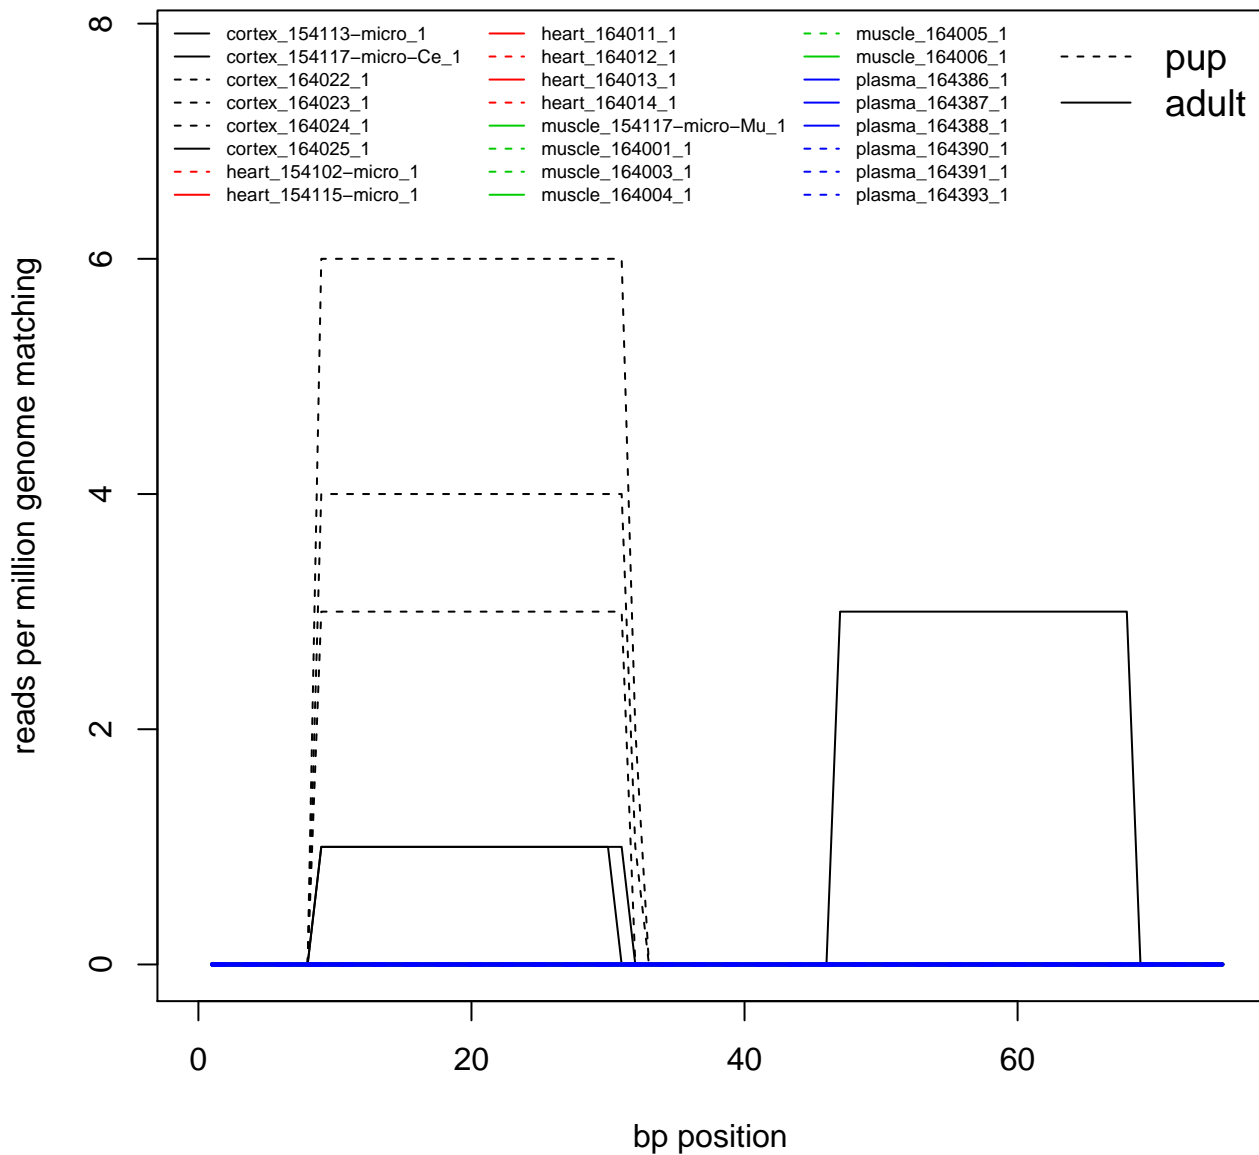





# novel\_28

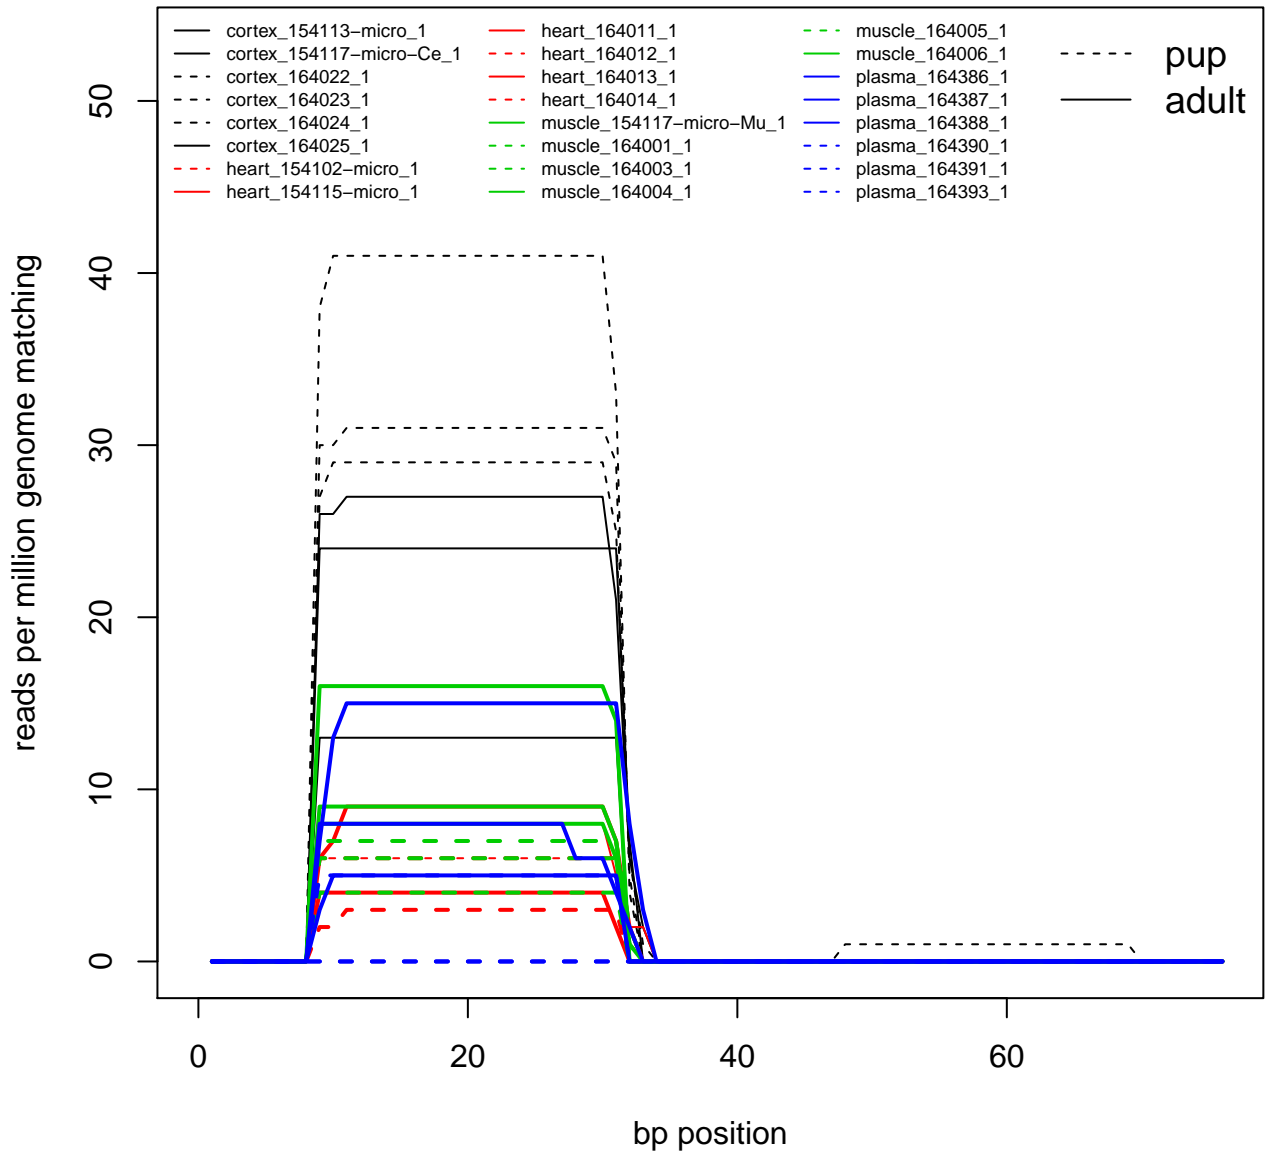



# novel\_30

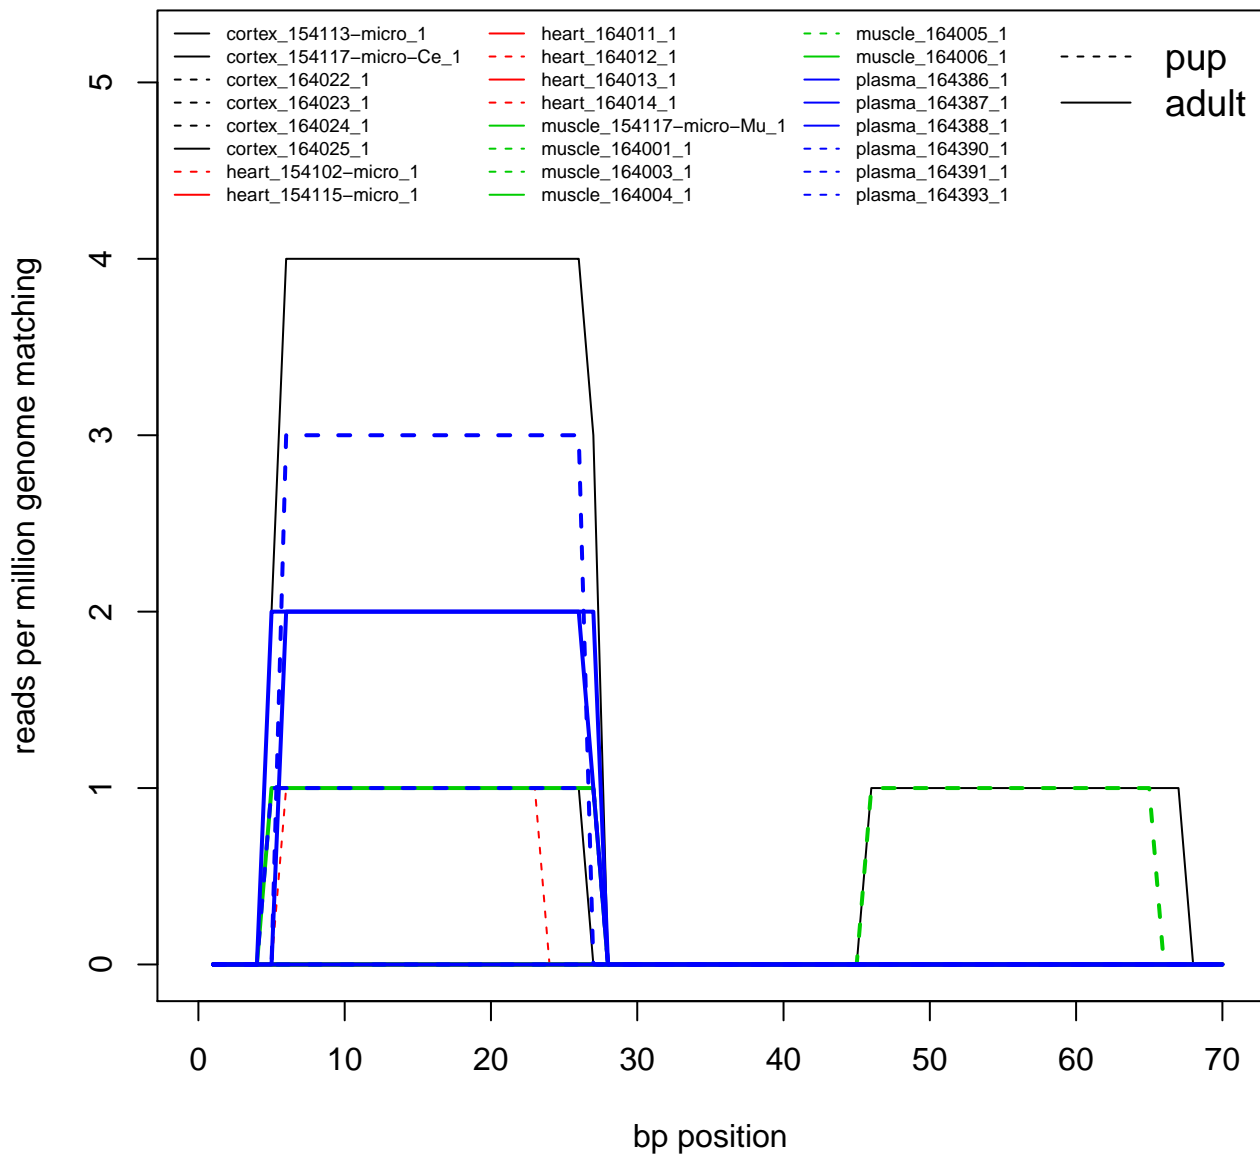













# lwe-miR-133\_loc1

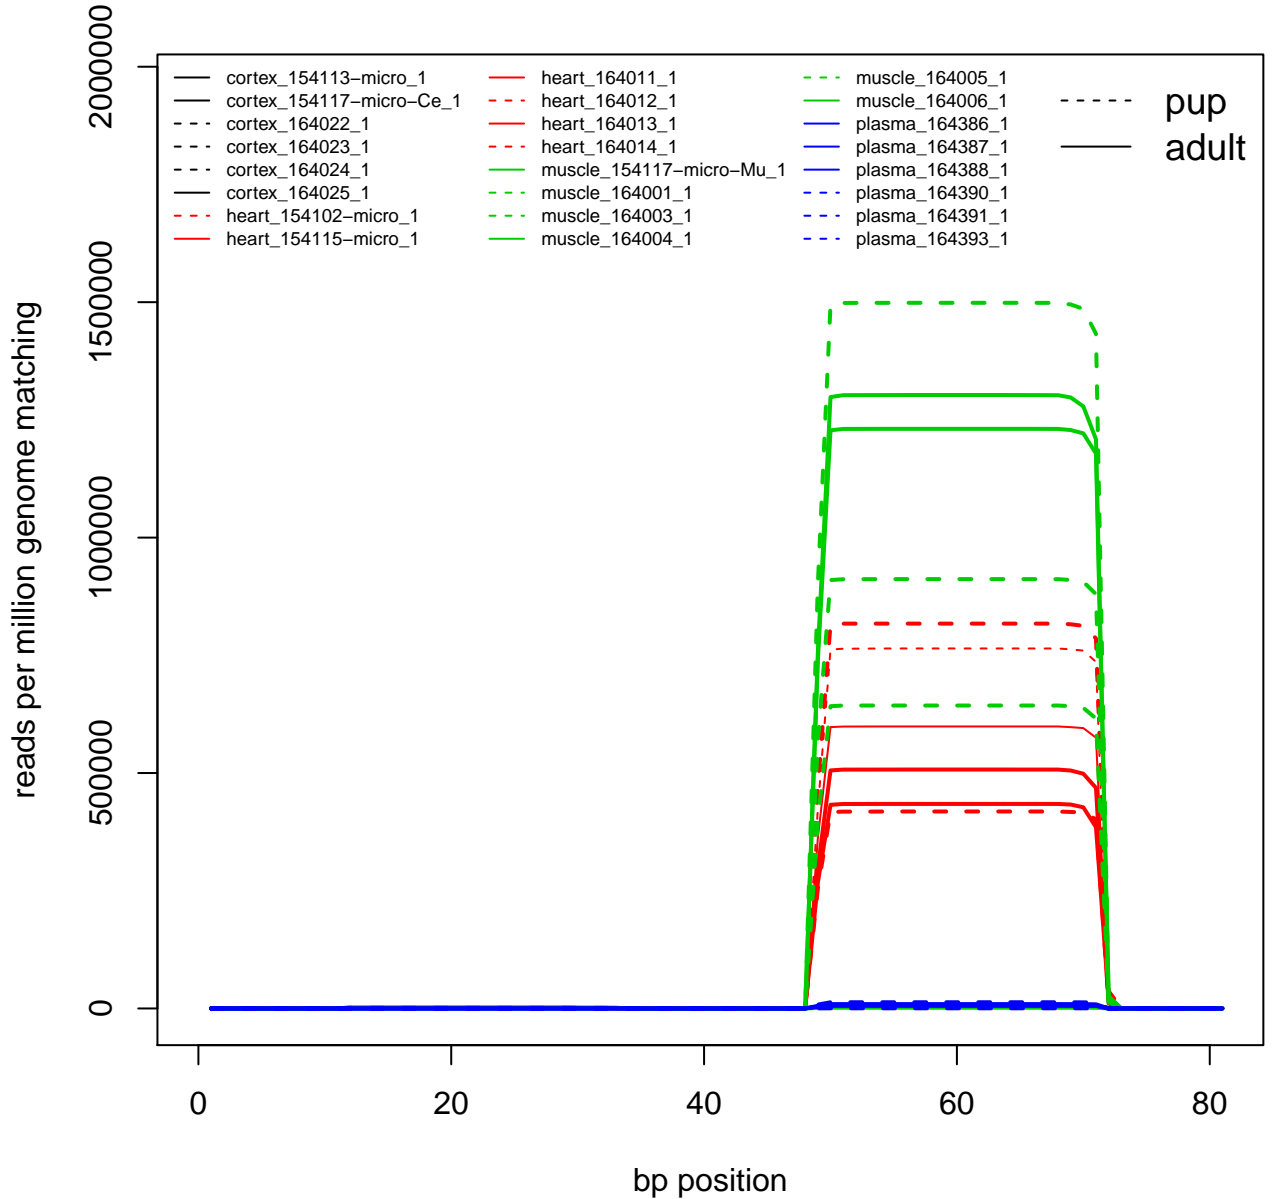

# lwe-miR-1\_loc1

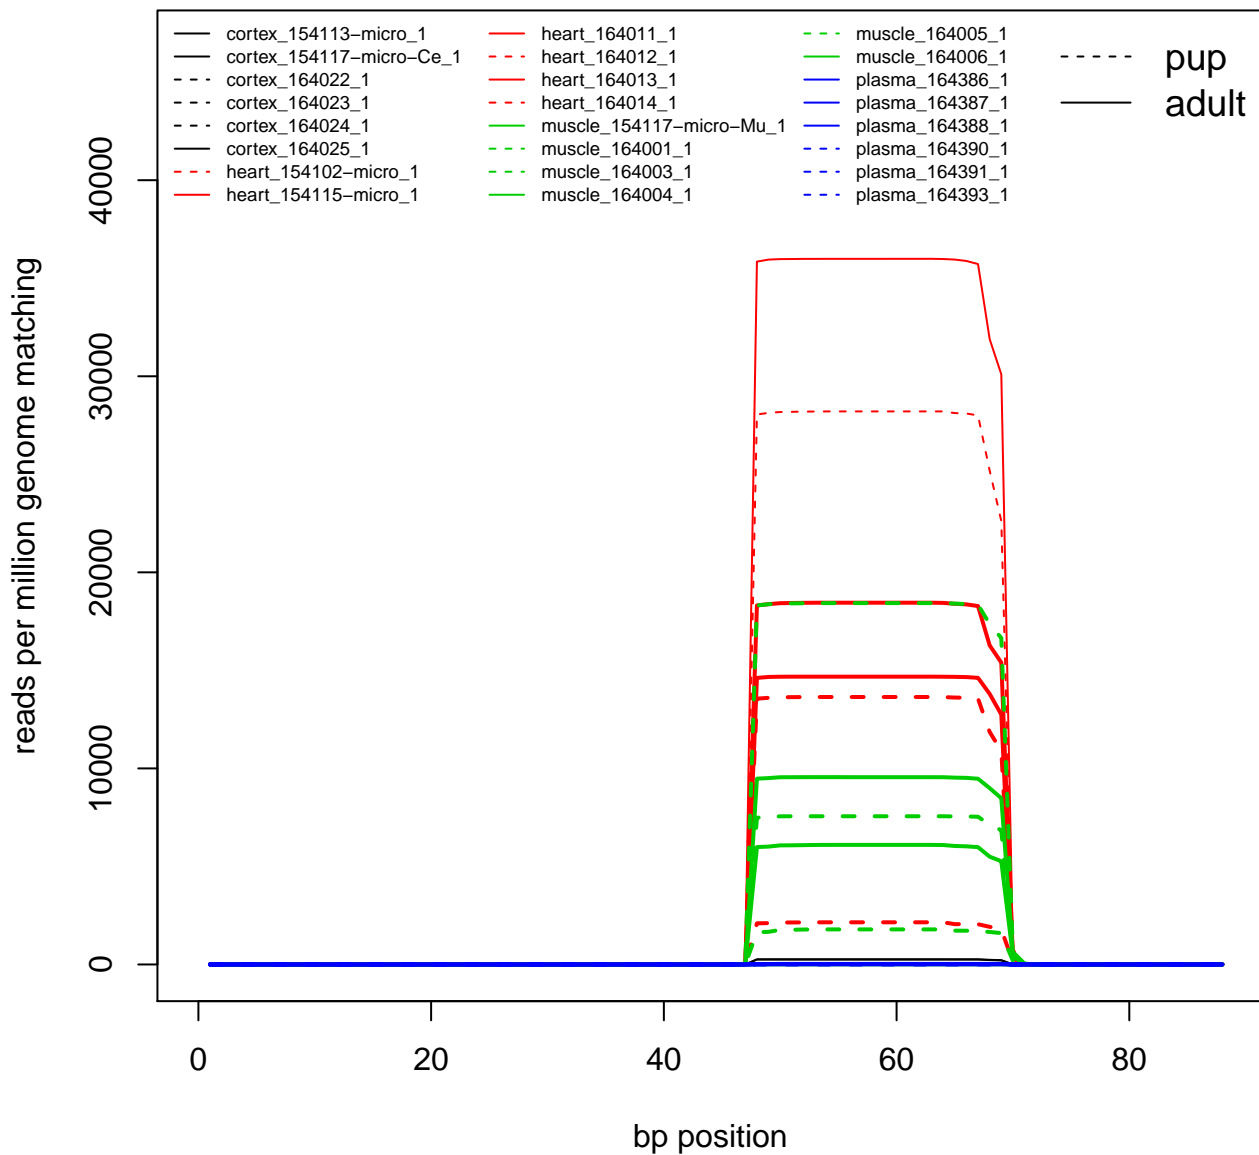

# lwe-miR-1343\_loc1

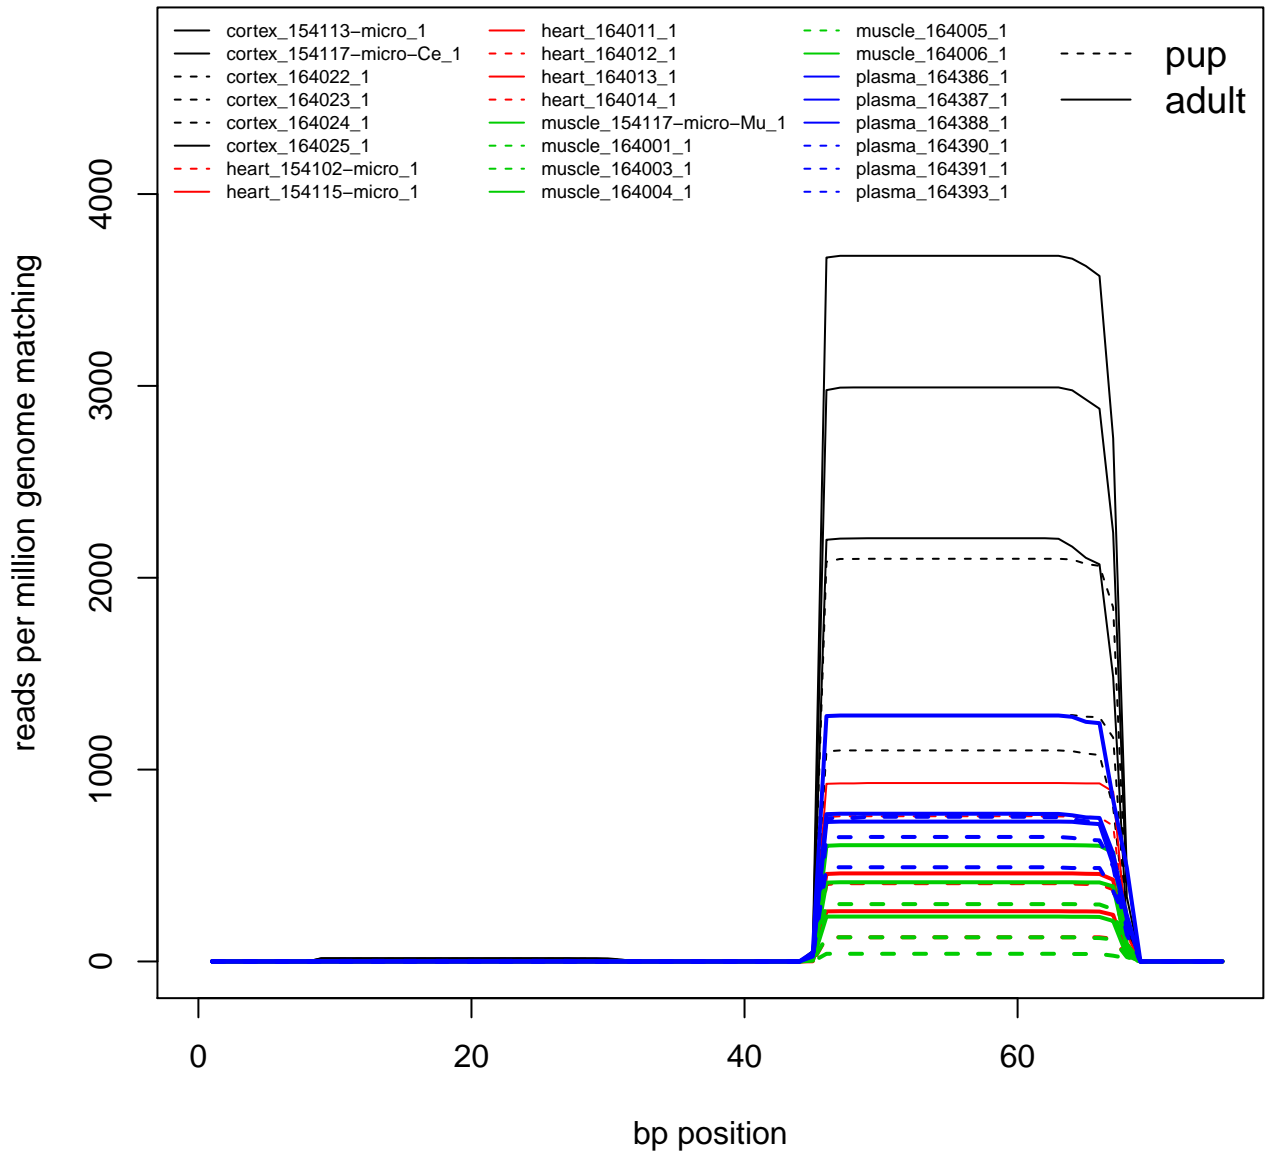





# lwe-miR-9\_loc1

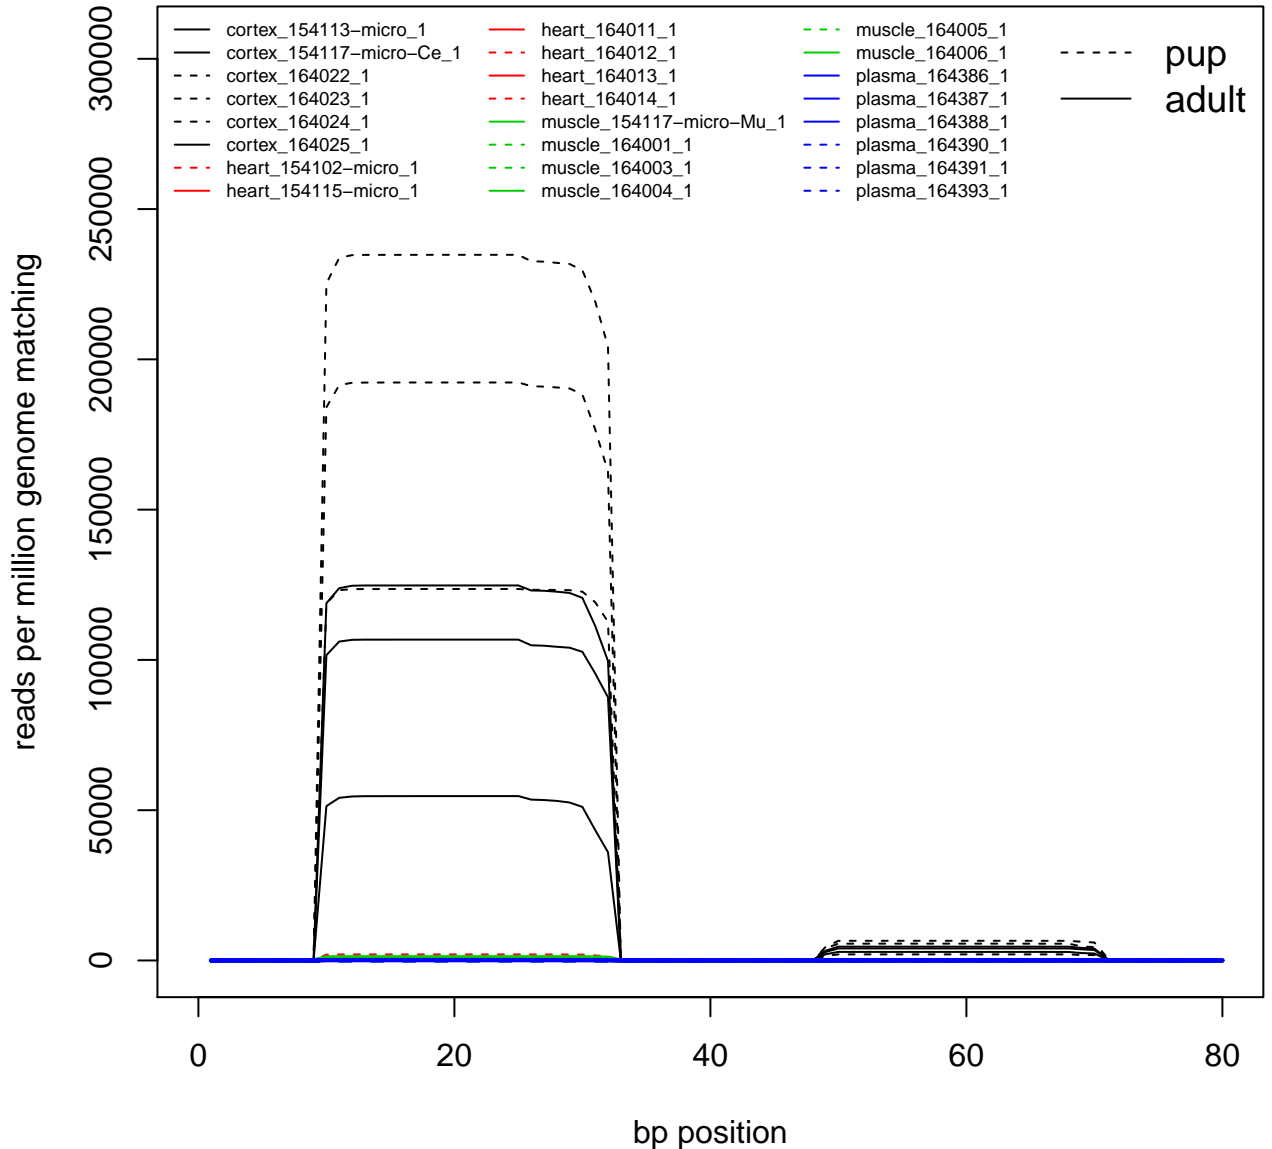

# let-7a\_loc2

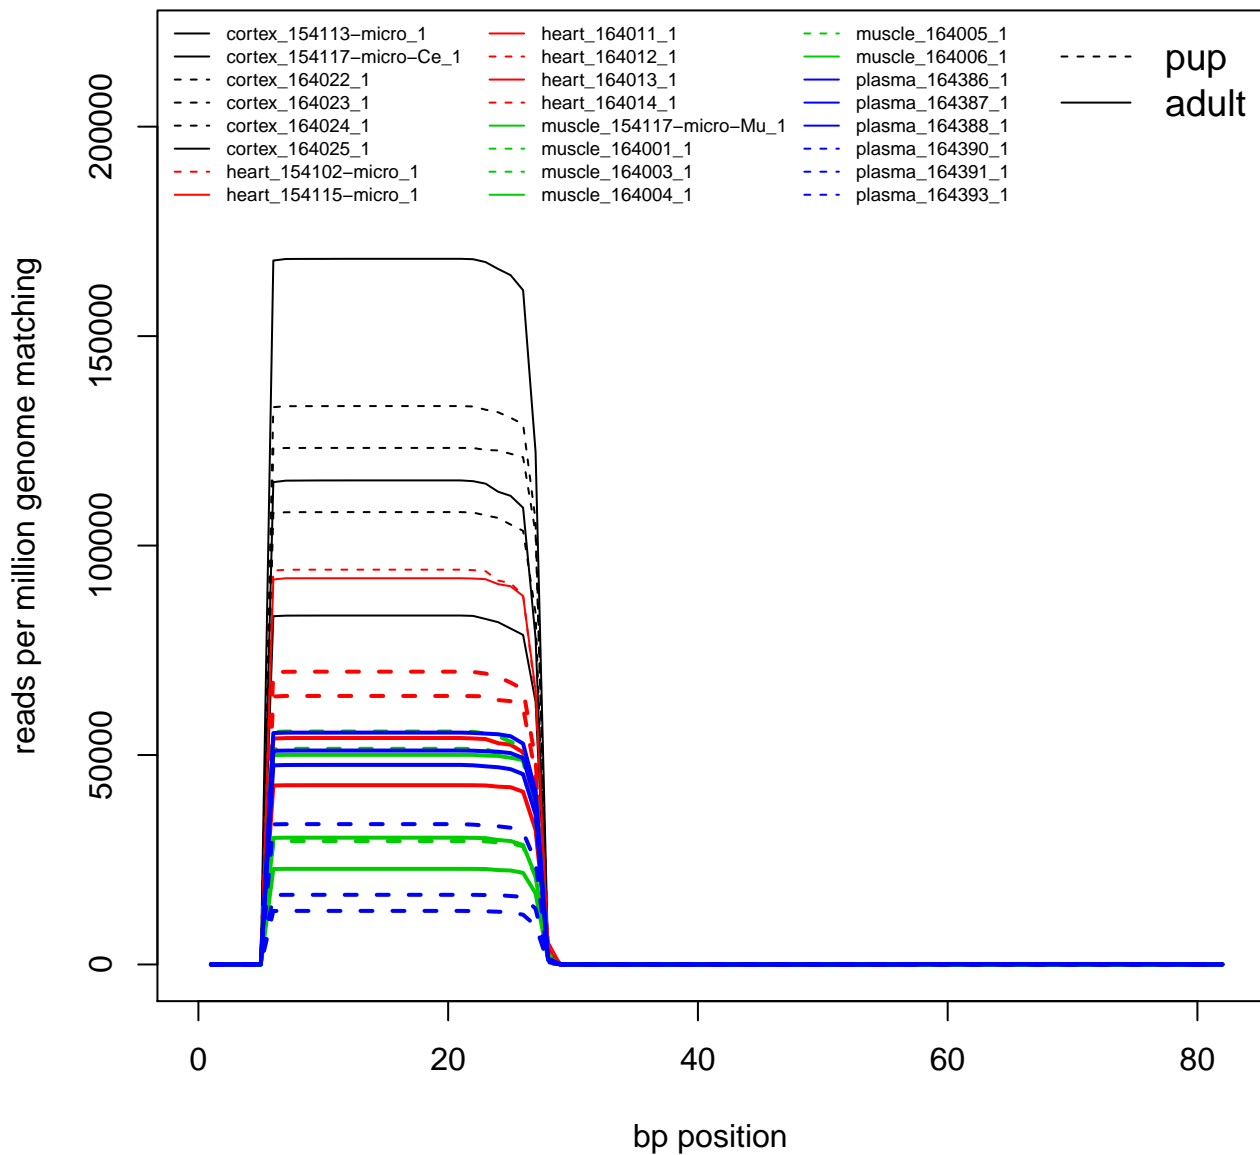

# let-7f\_loc1

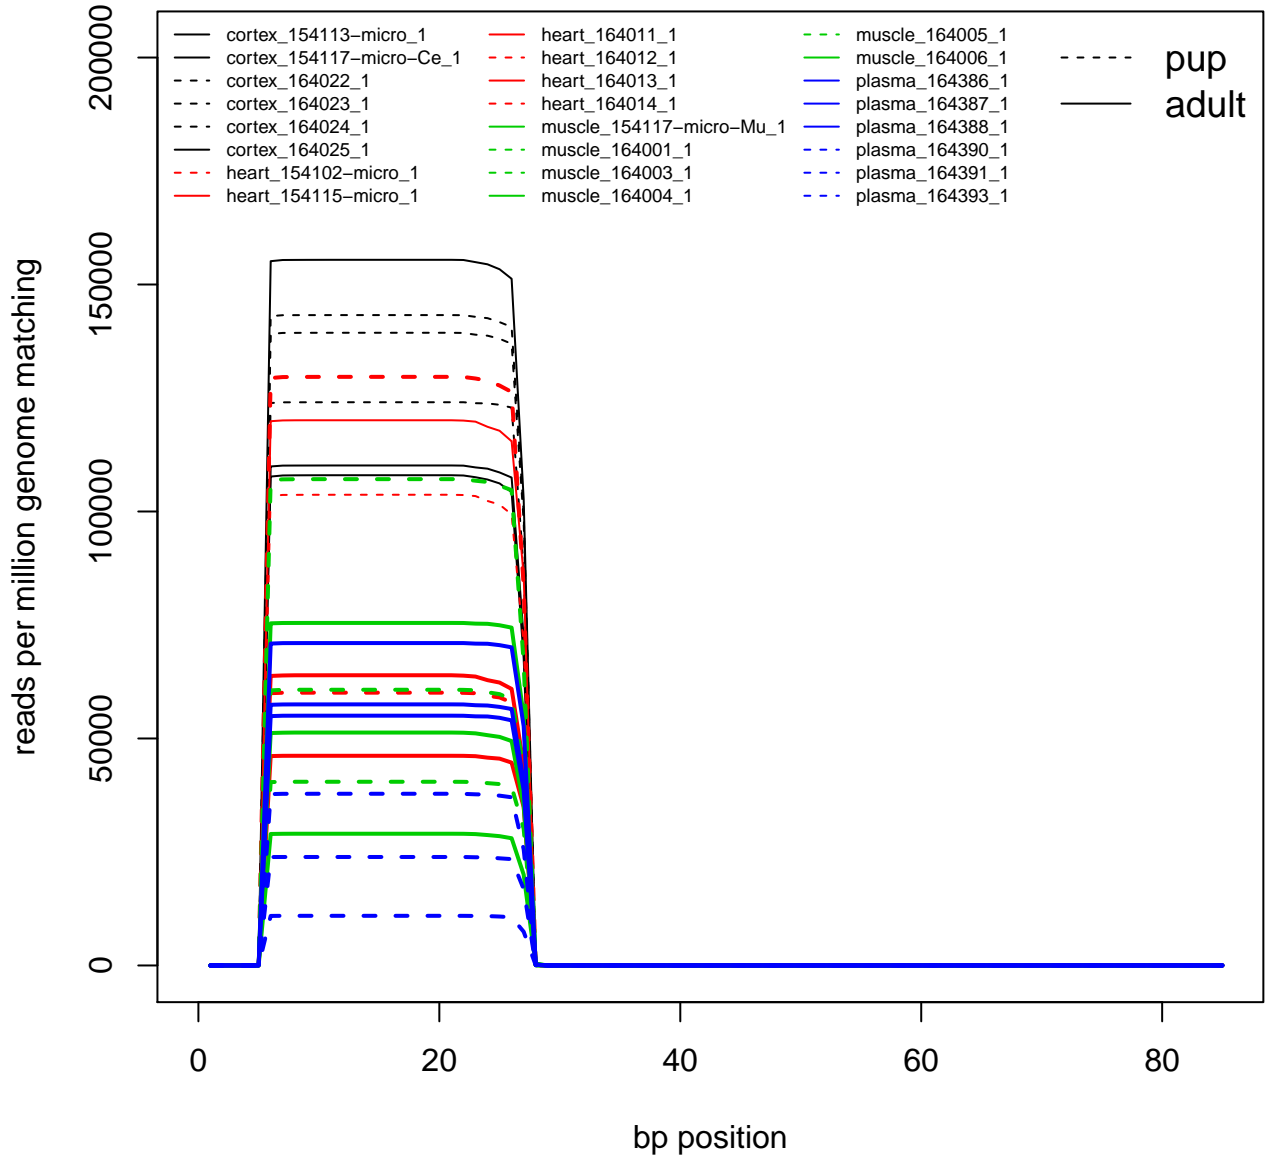

# let-7d\_loc1

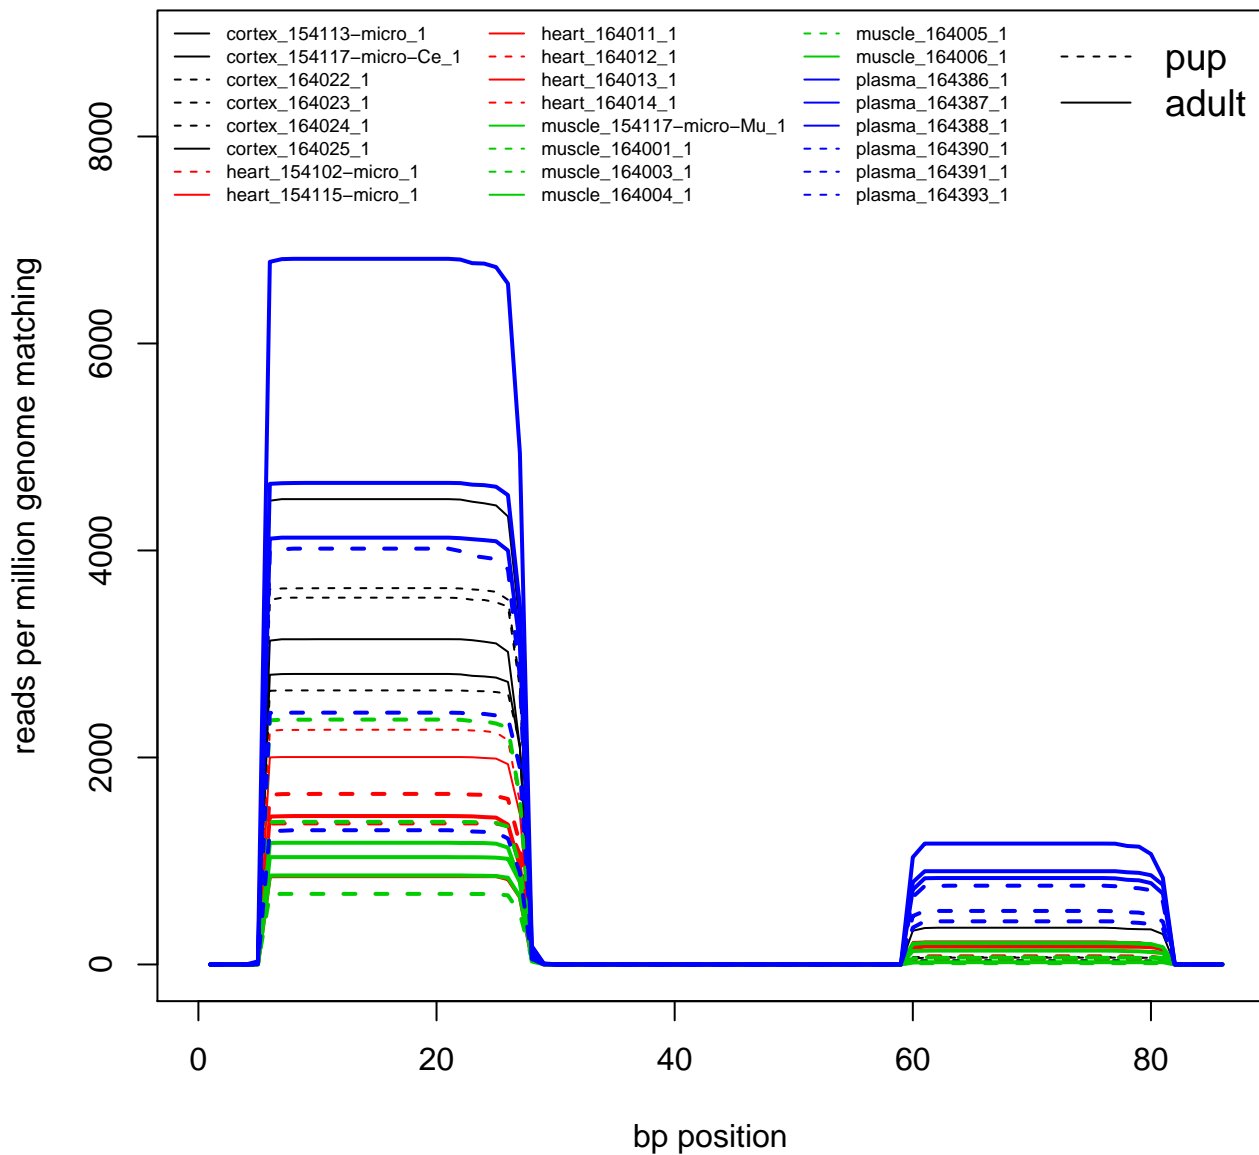

# novel\_35

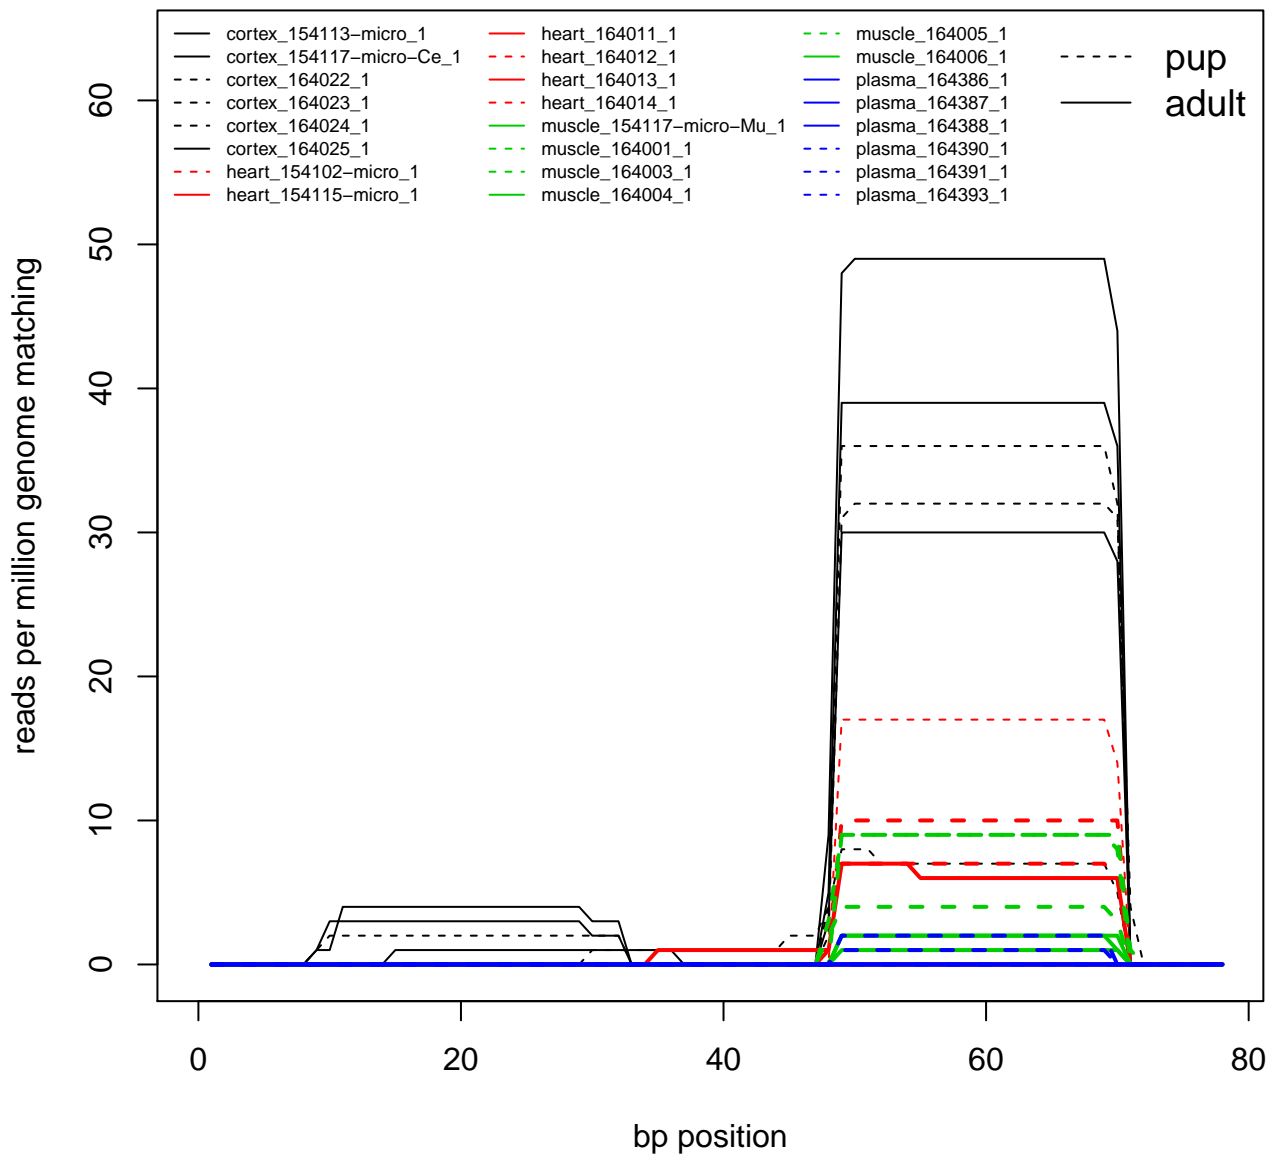

# novel\_36

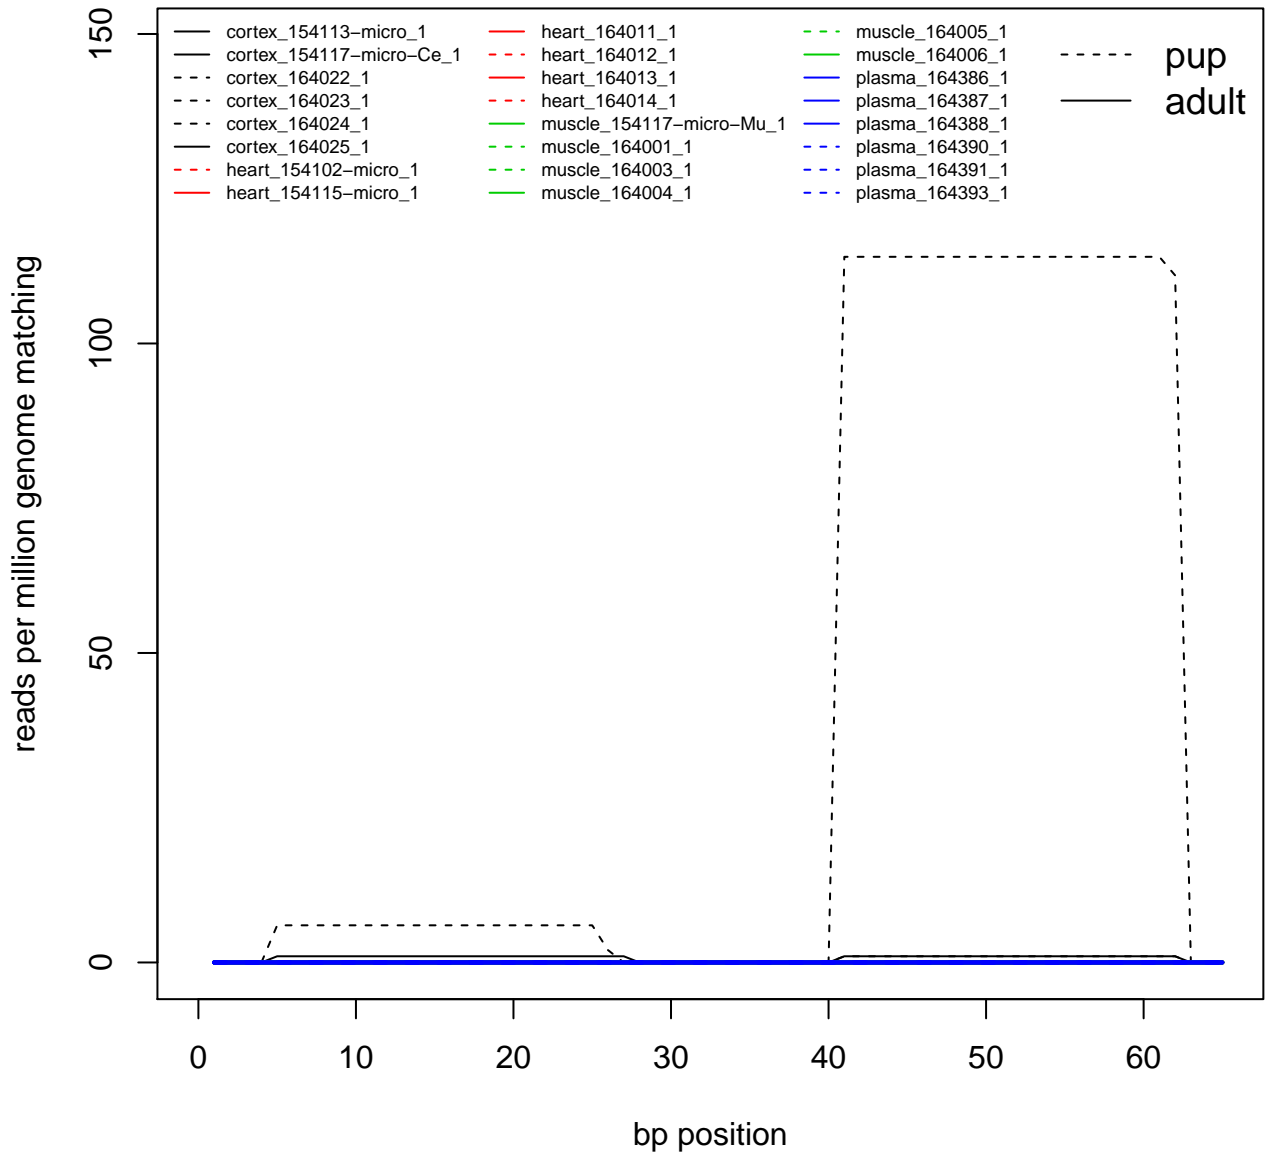

# lwe-miR-374a\_loc1

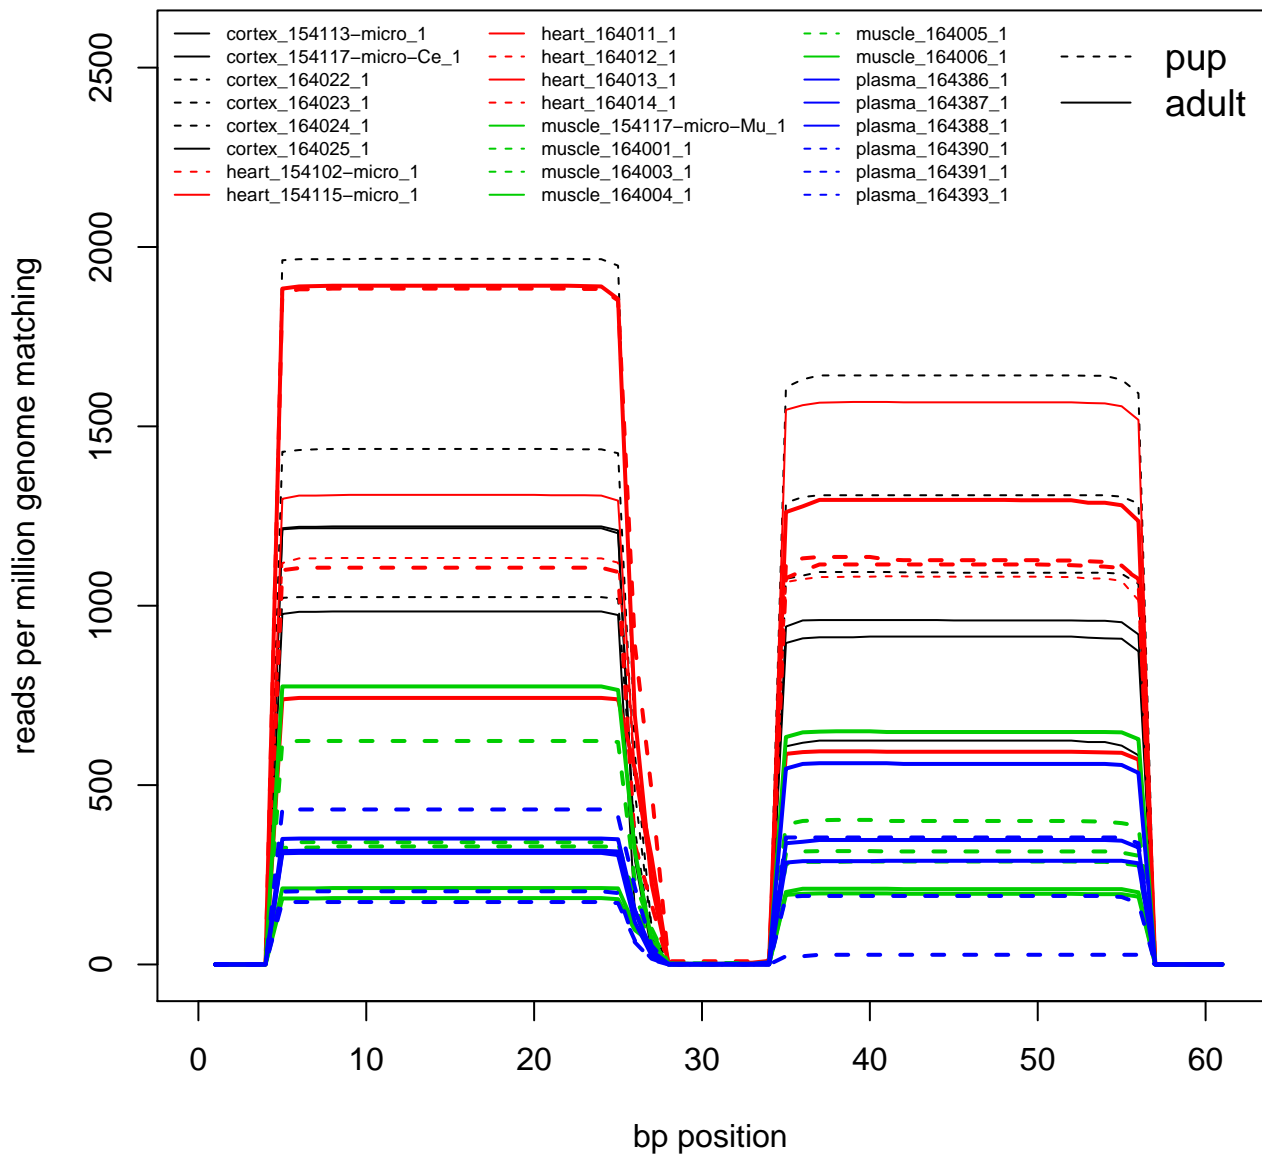



# lwe-miR-545\_loc1

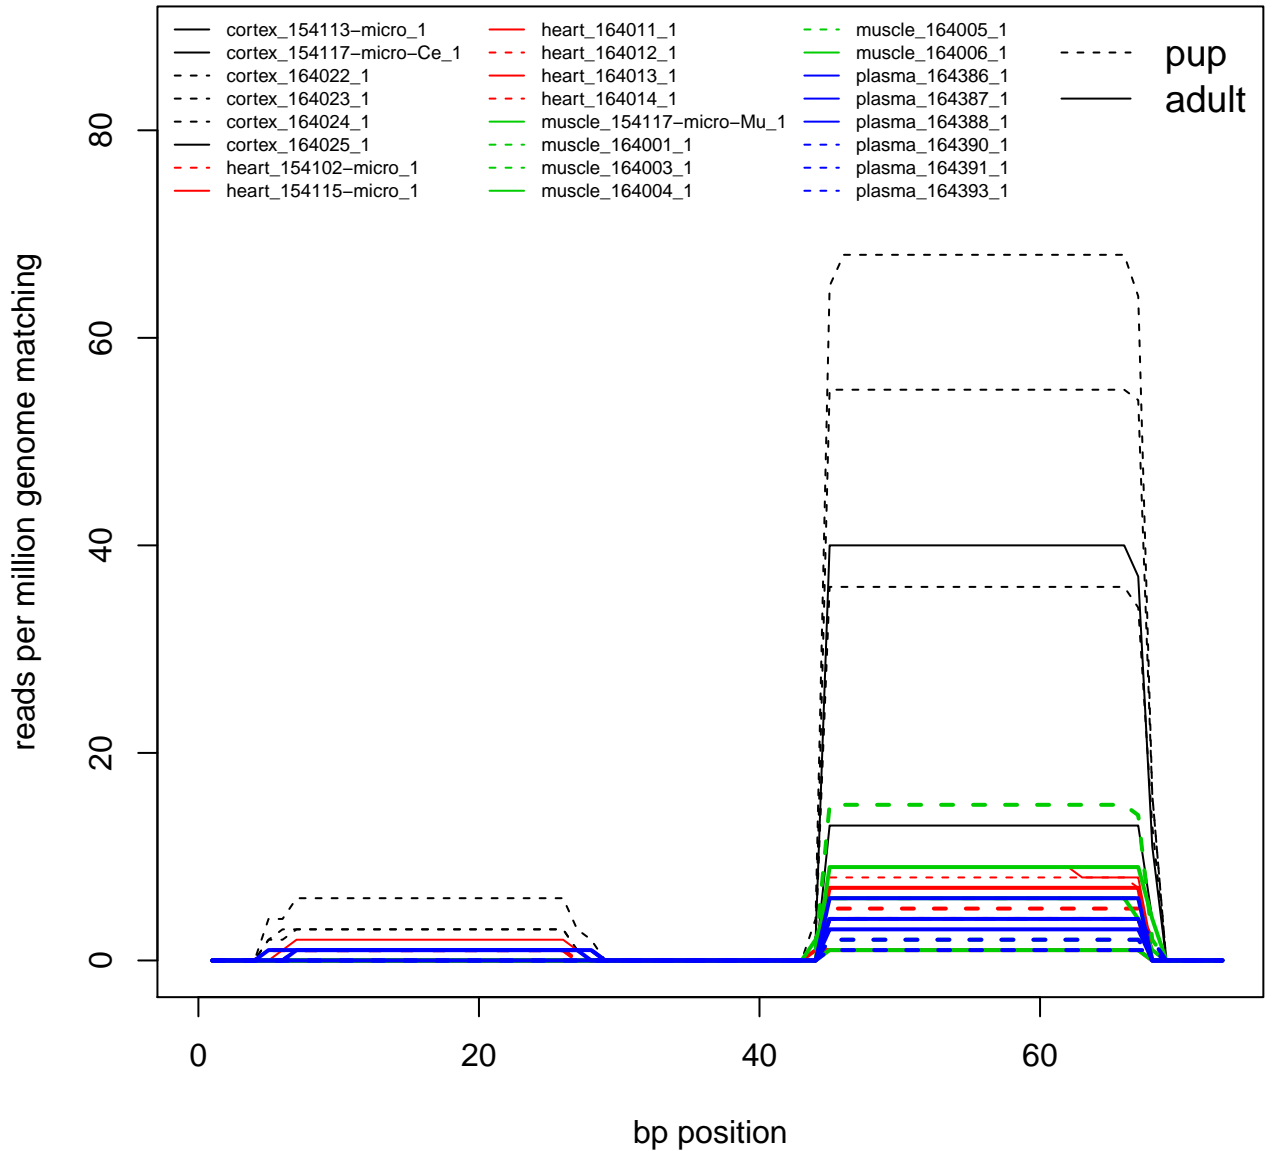

# lwe-miR-421\_loc1

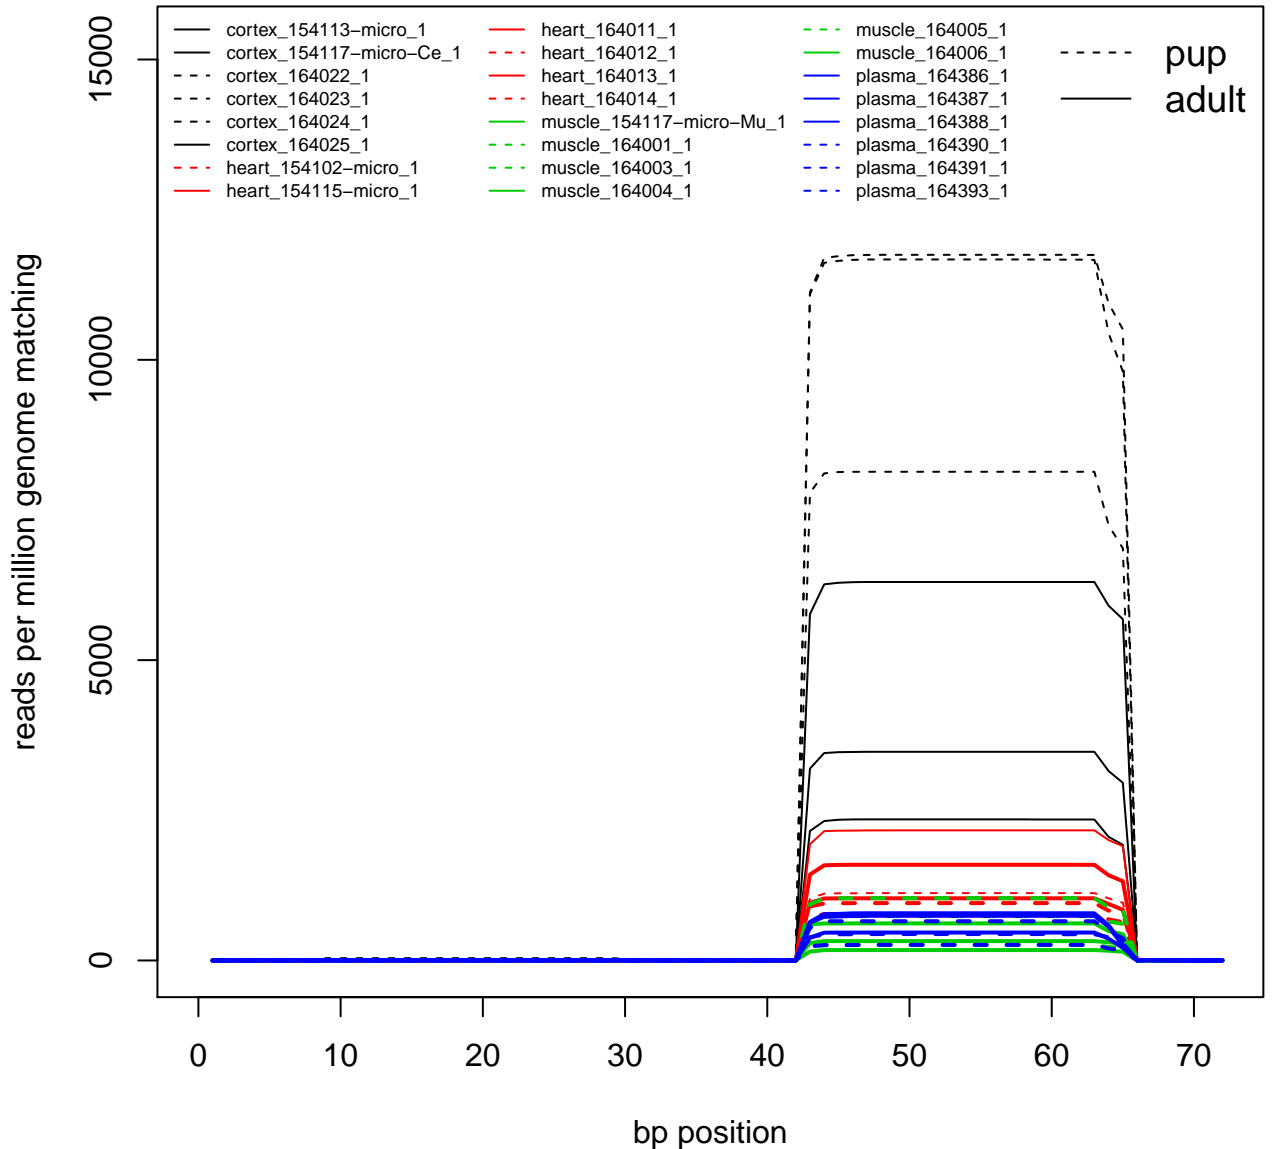

# novel\_37

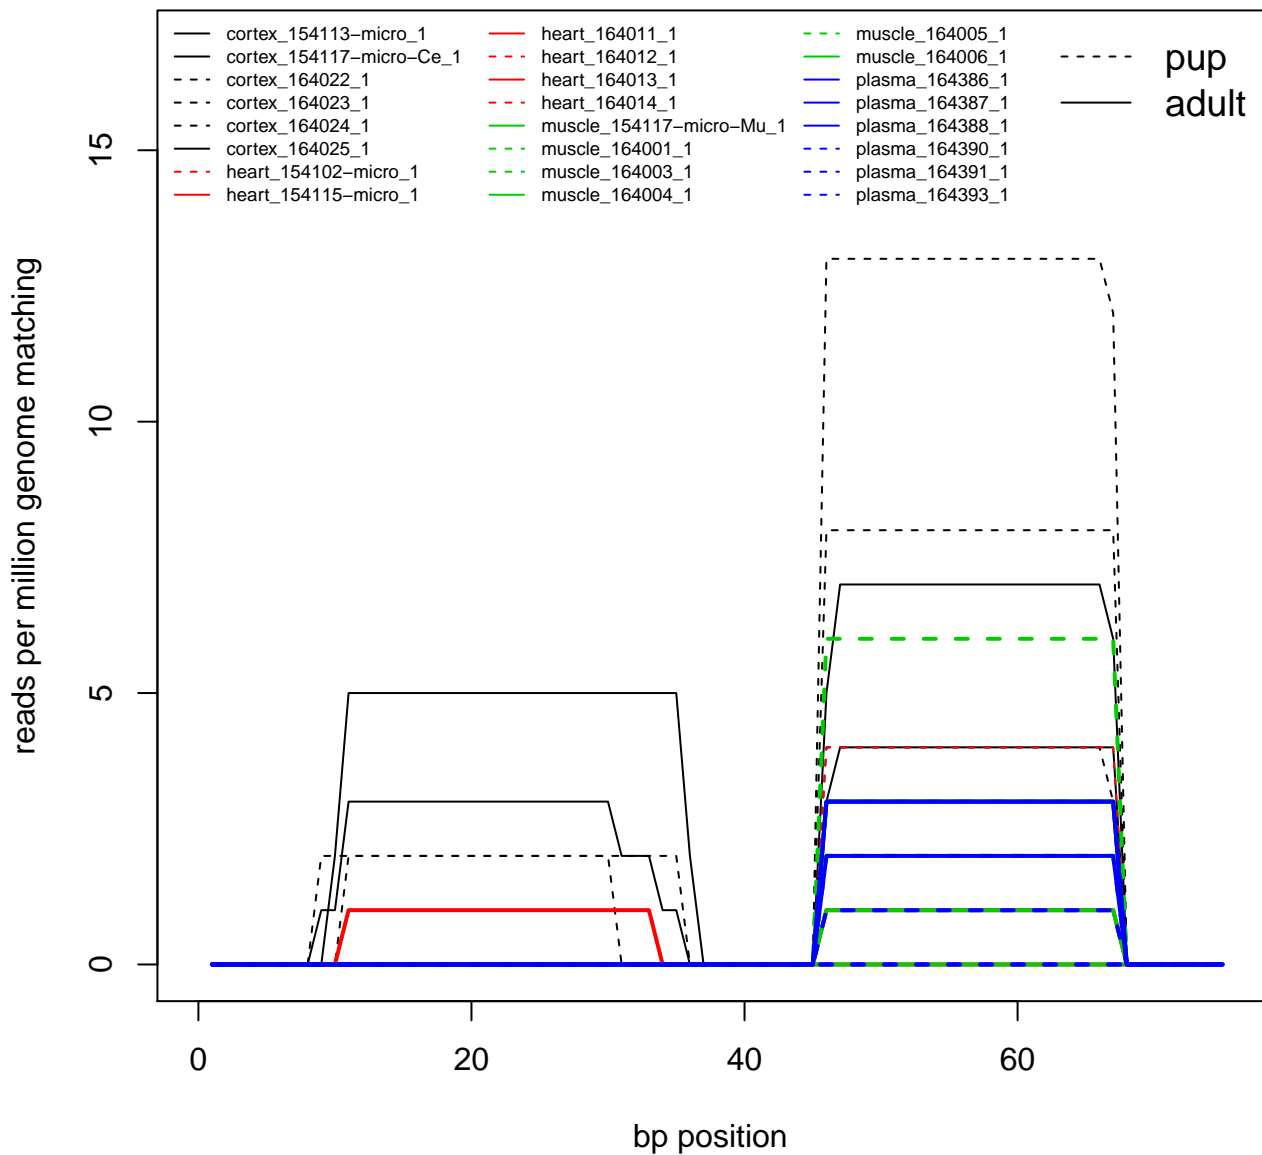

# novel\_38

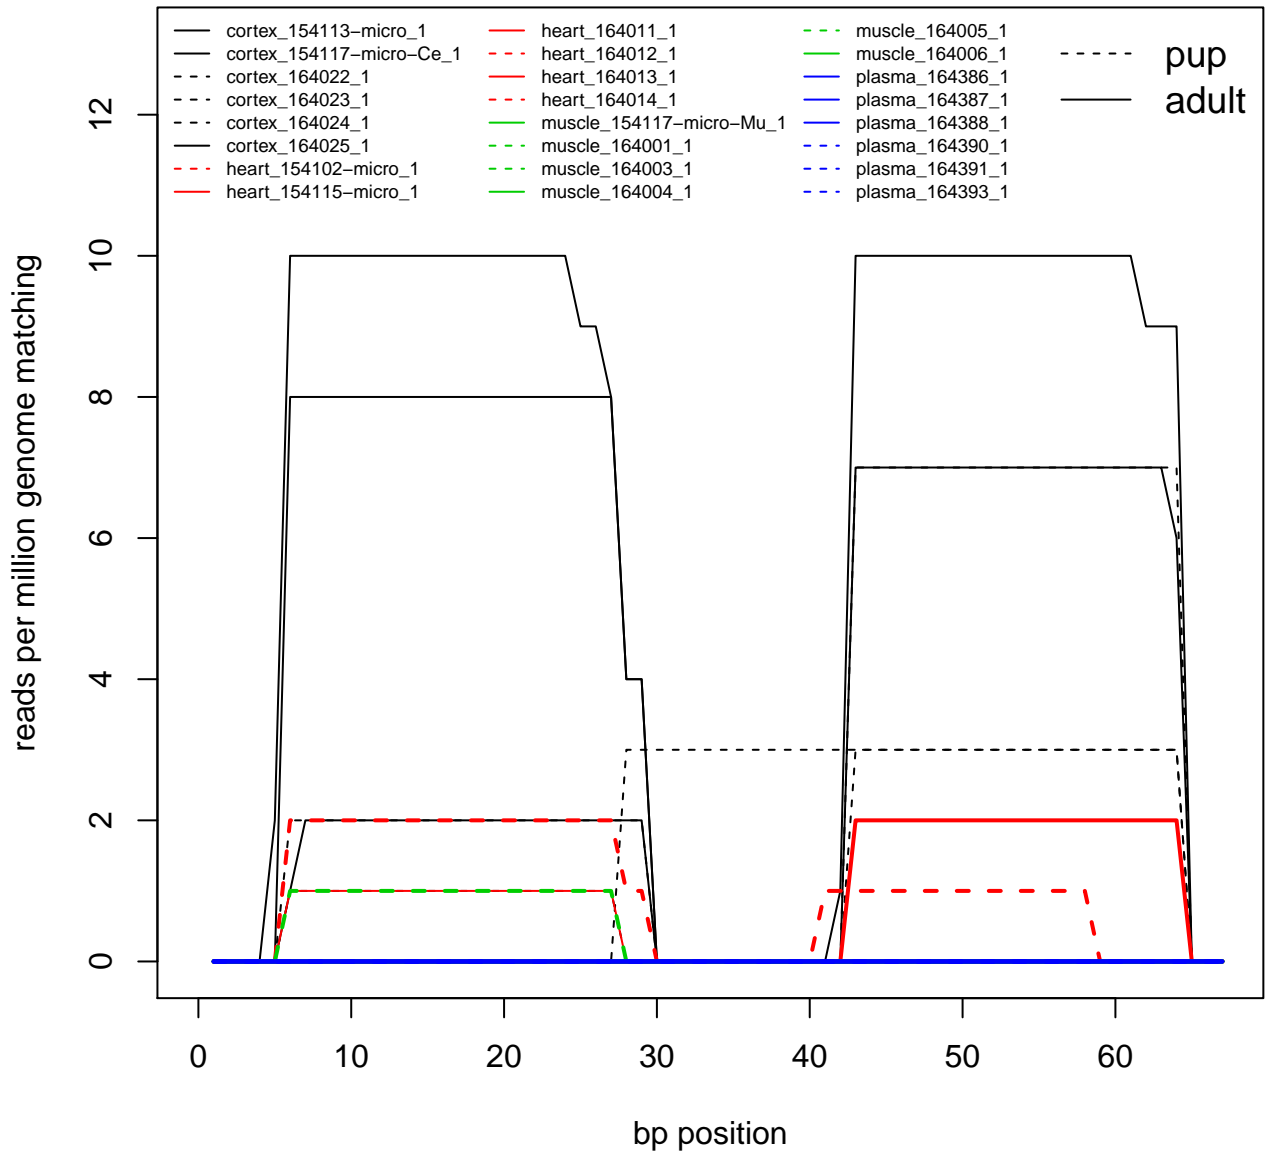

# lwe-miR-155a\_loc1

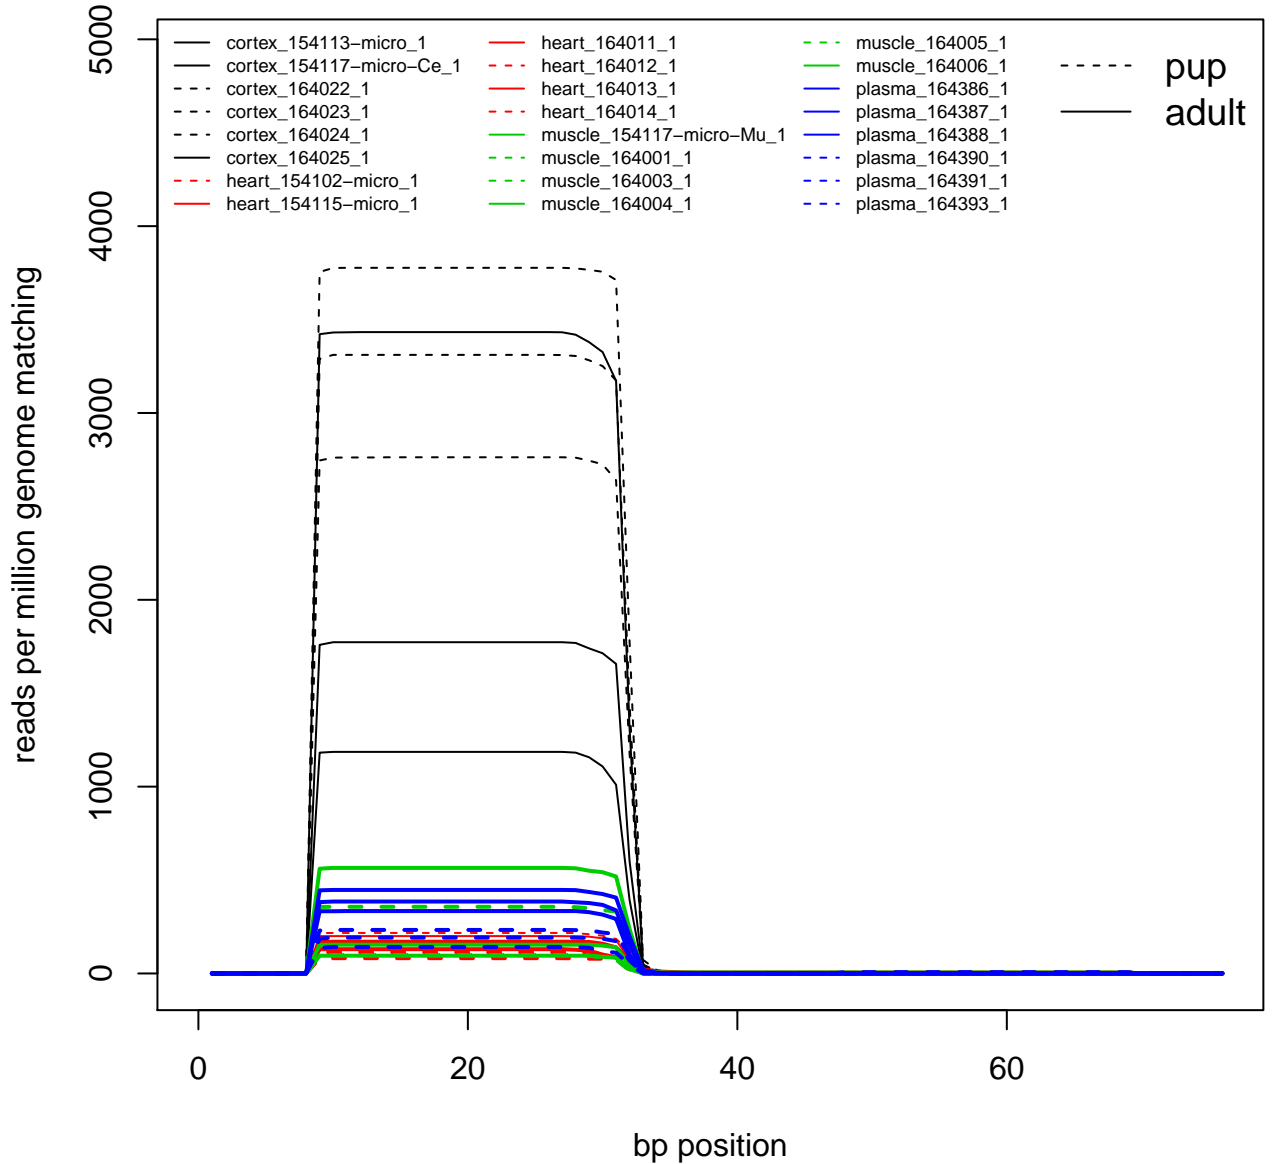

# novel\_39

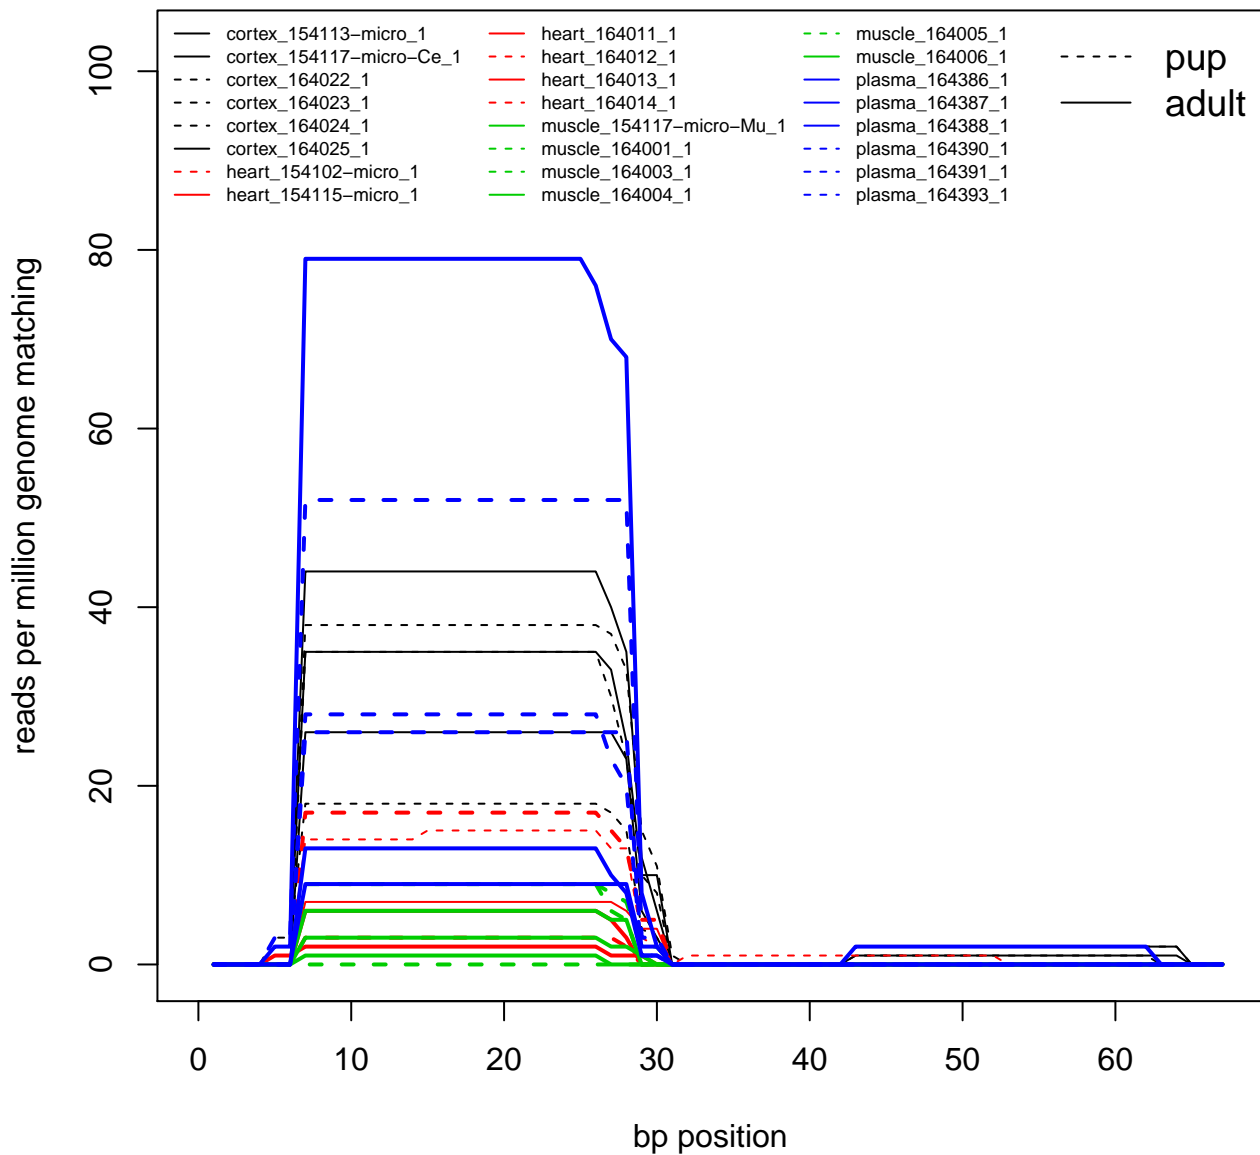

# lwe-miR-490\_loc1

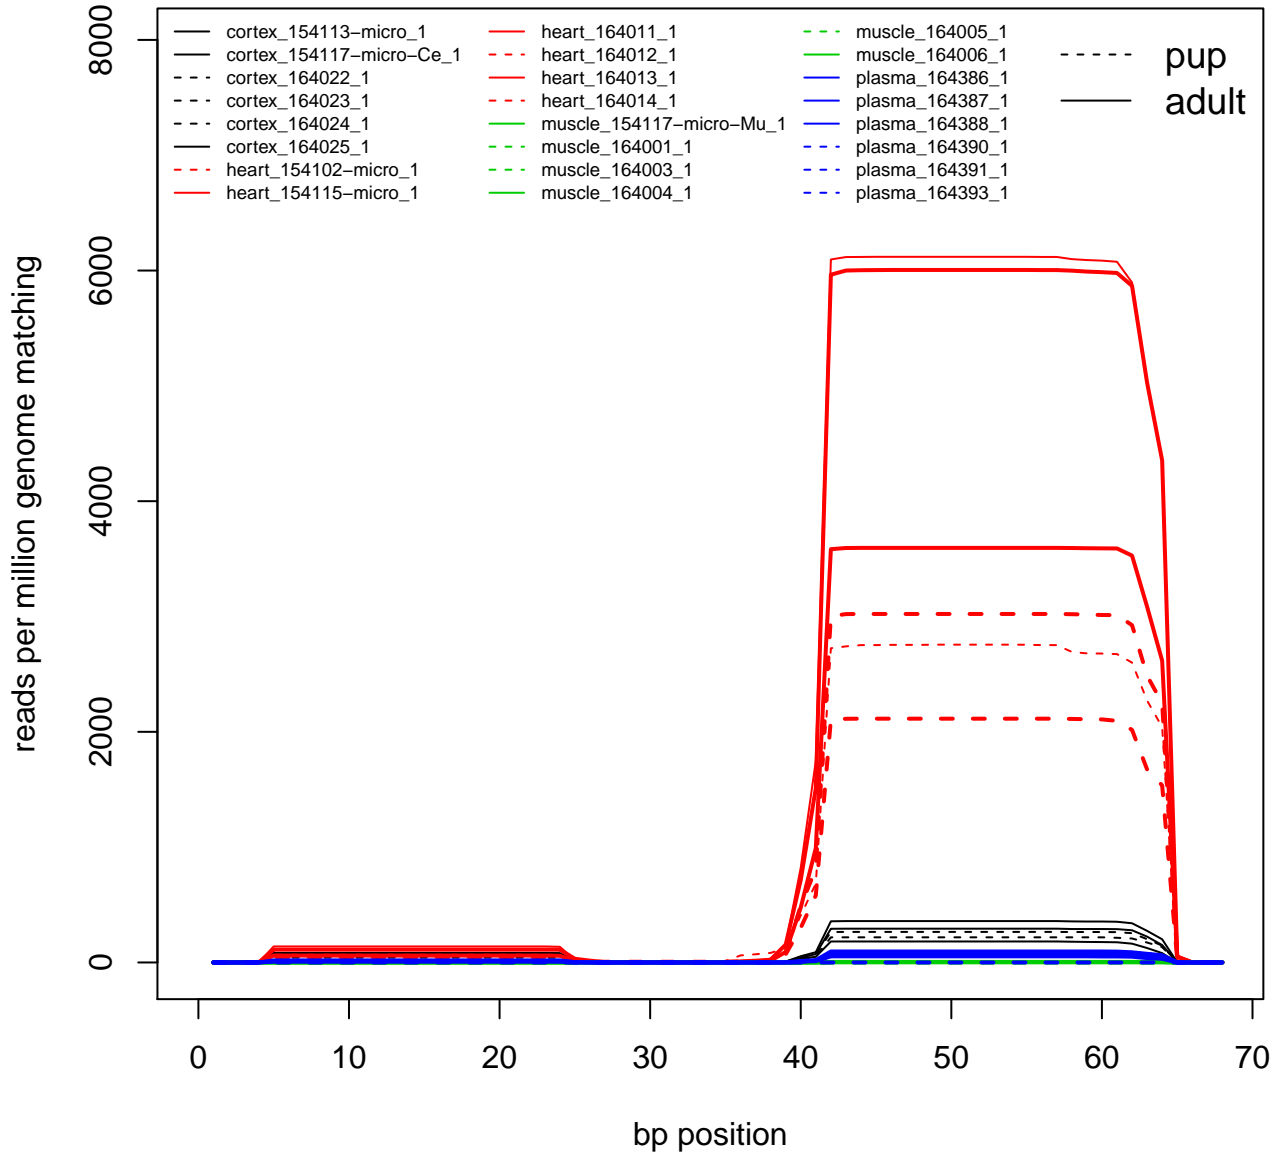





# lwe-miR-423\_loc1

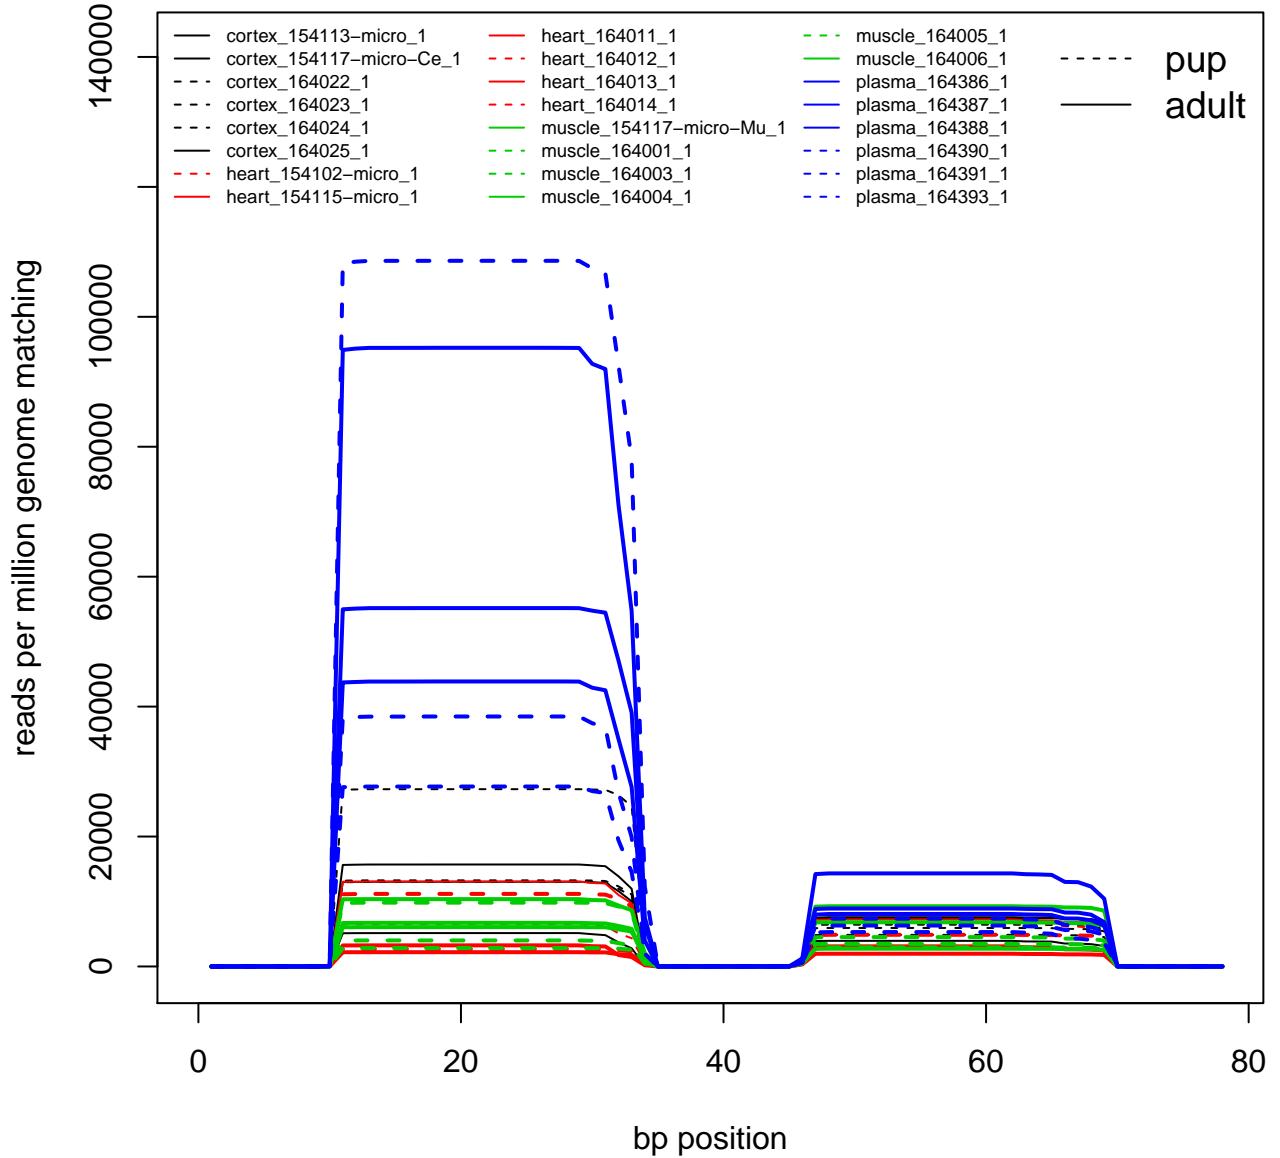

# novel\_41

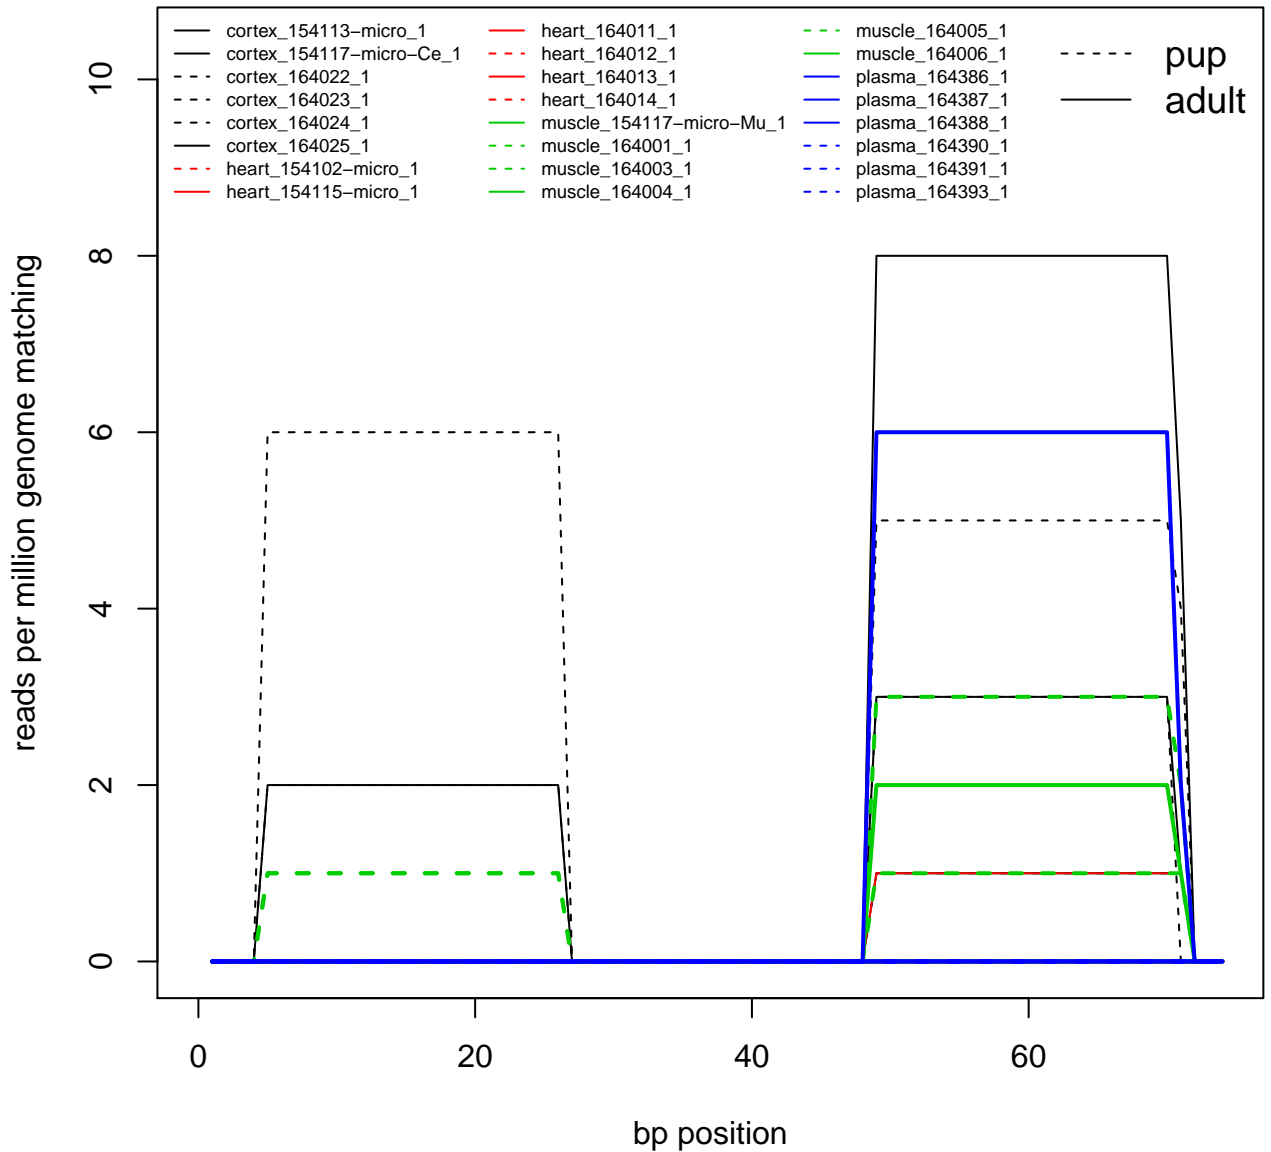

# Iwe-miR-34\_loc1

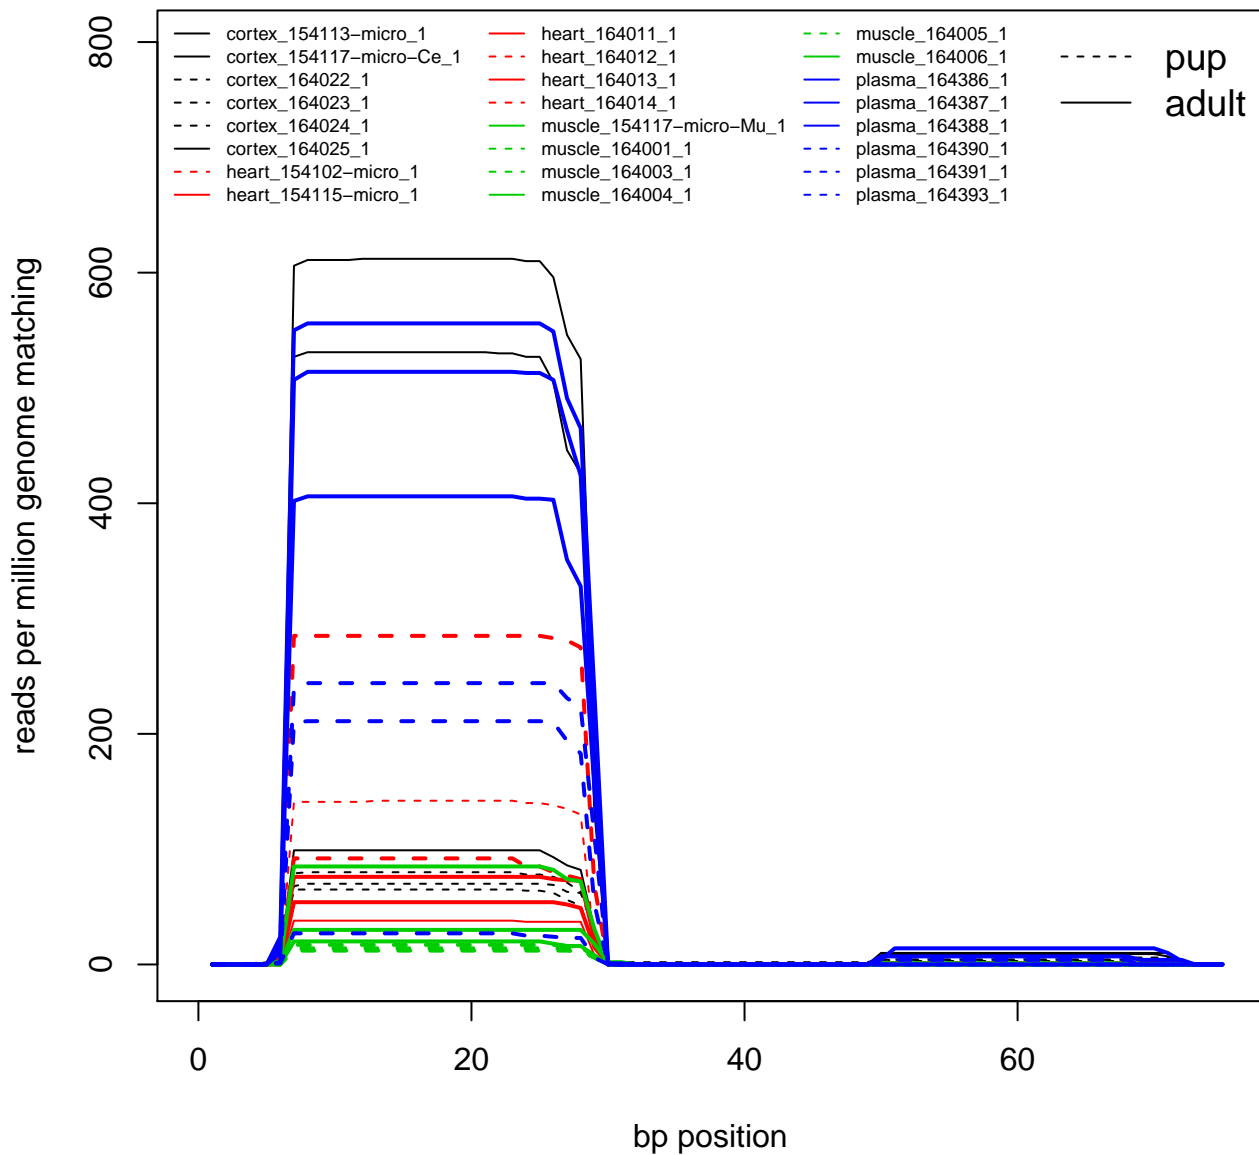

# lwe-miR-92b\_loc1

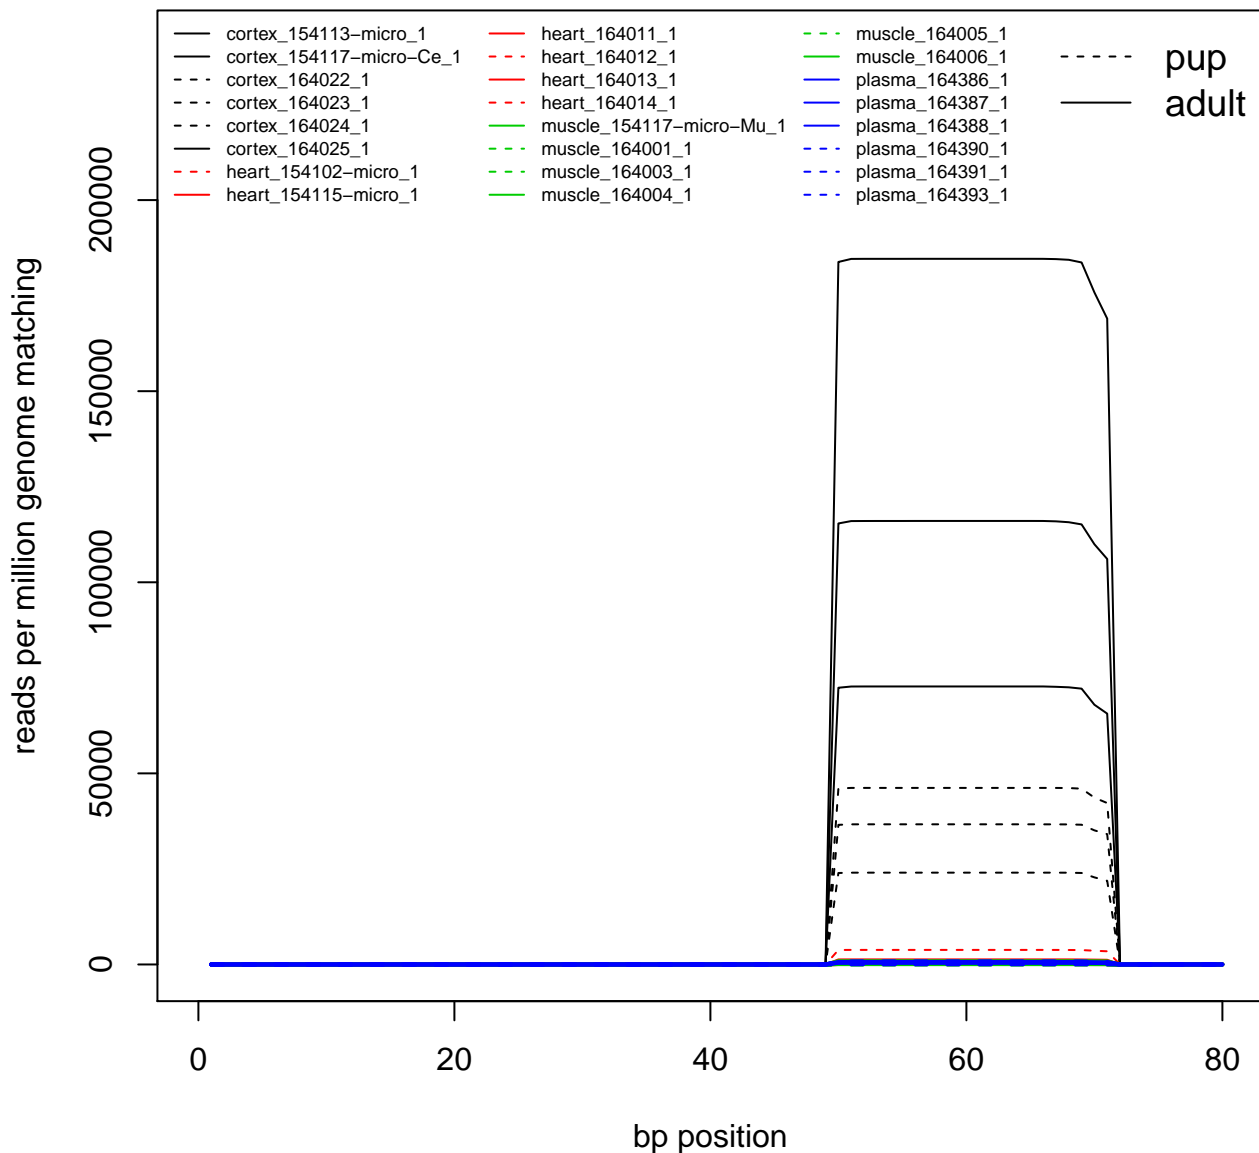

# lwe-miR-122\_loc1

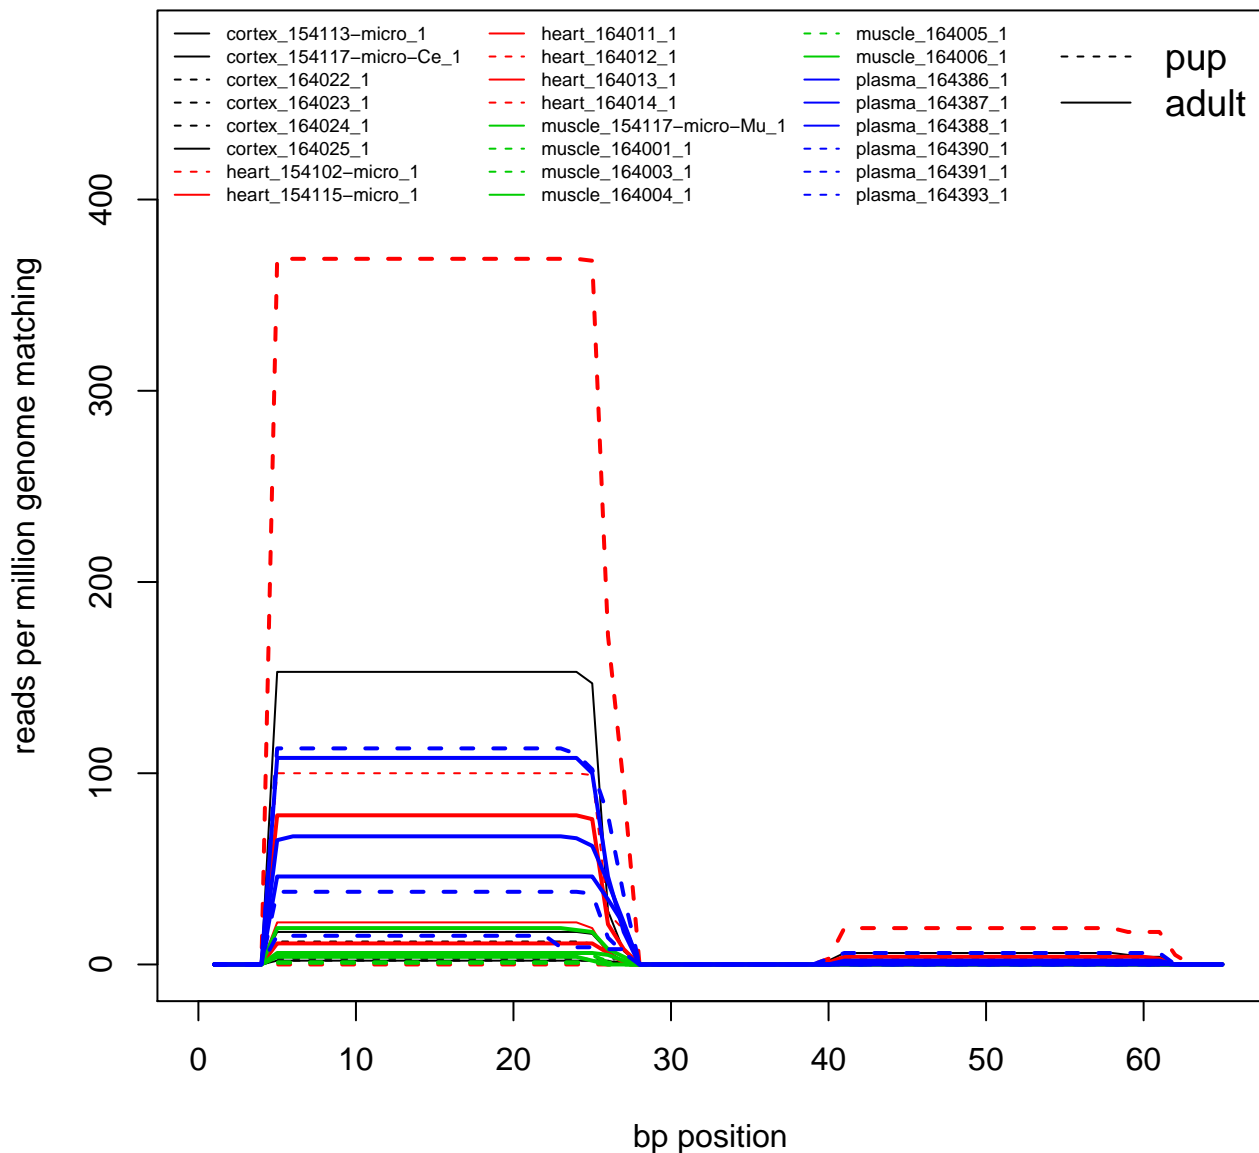

# lwe-miR-1296\_loc1

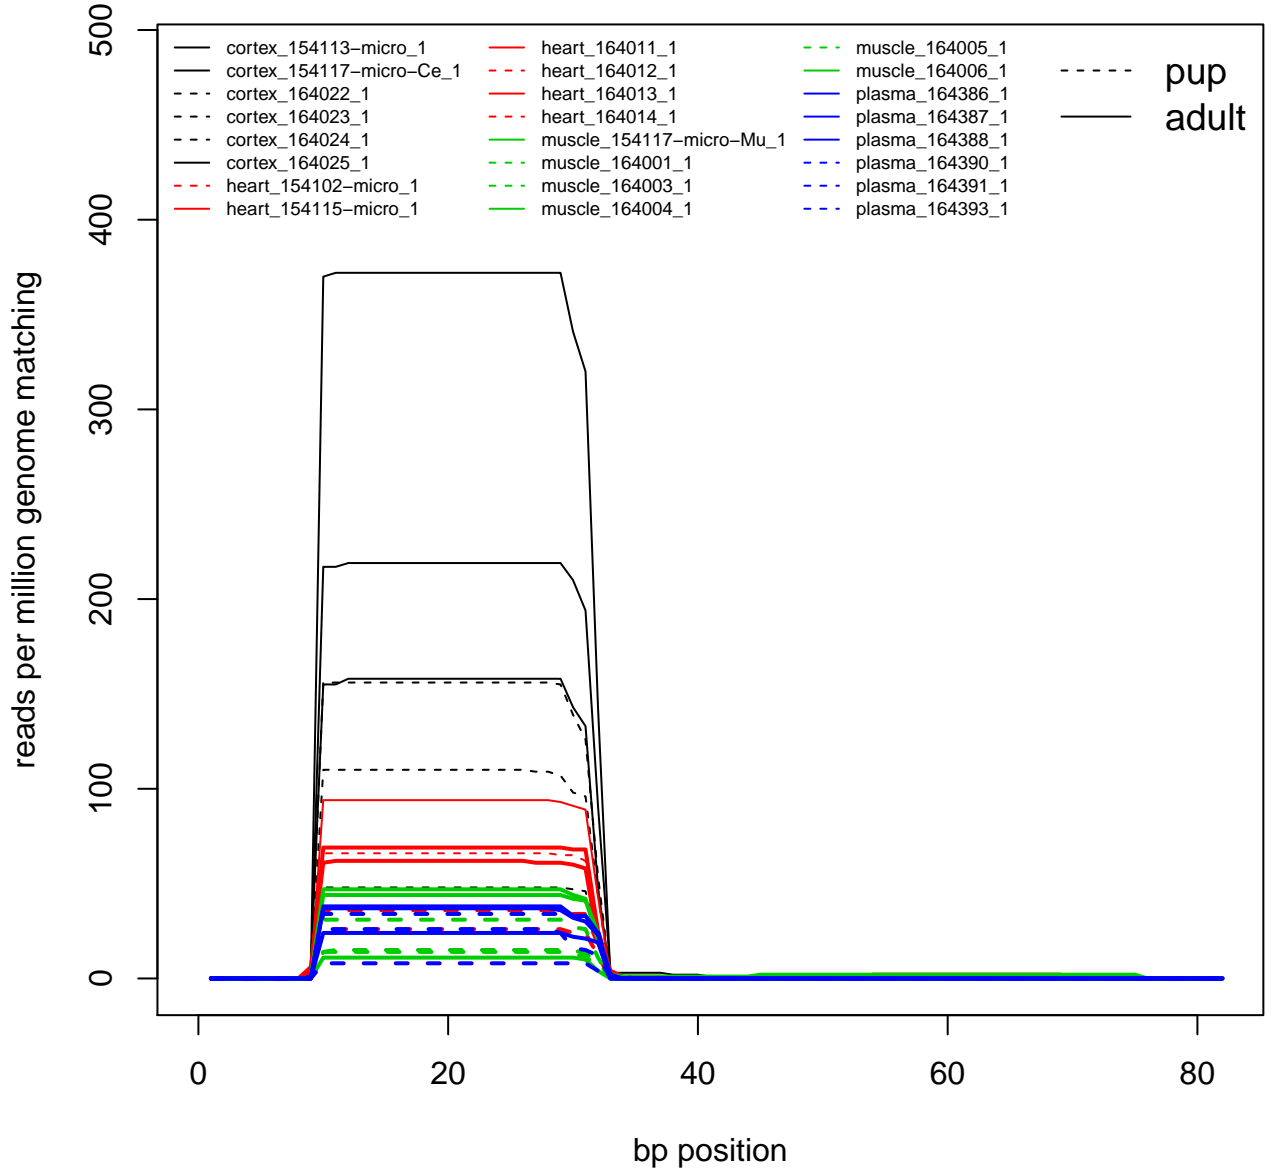

# lwe-miR-454\_loc1

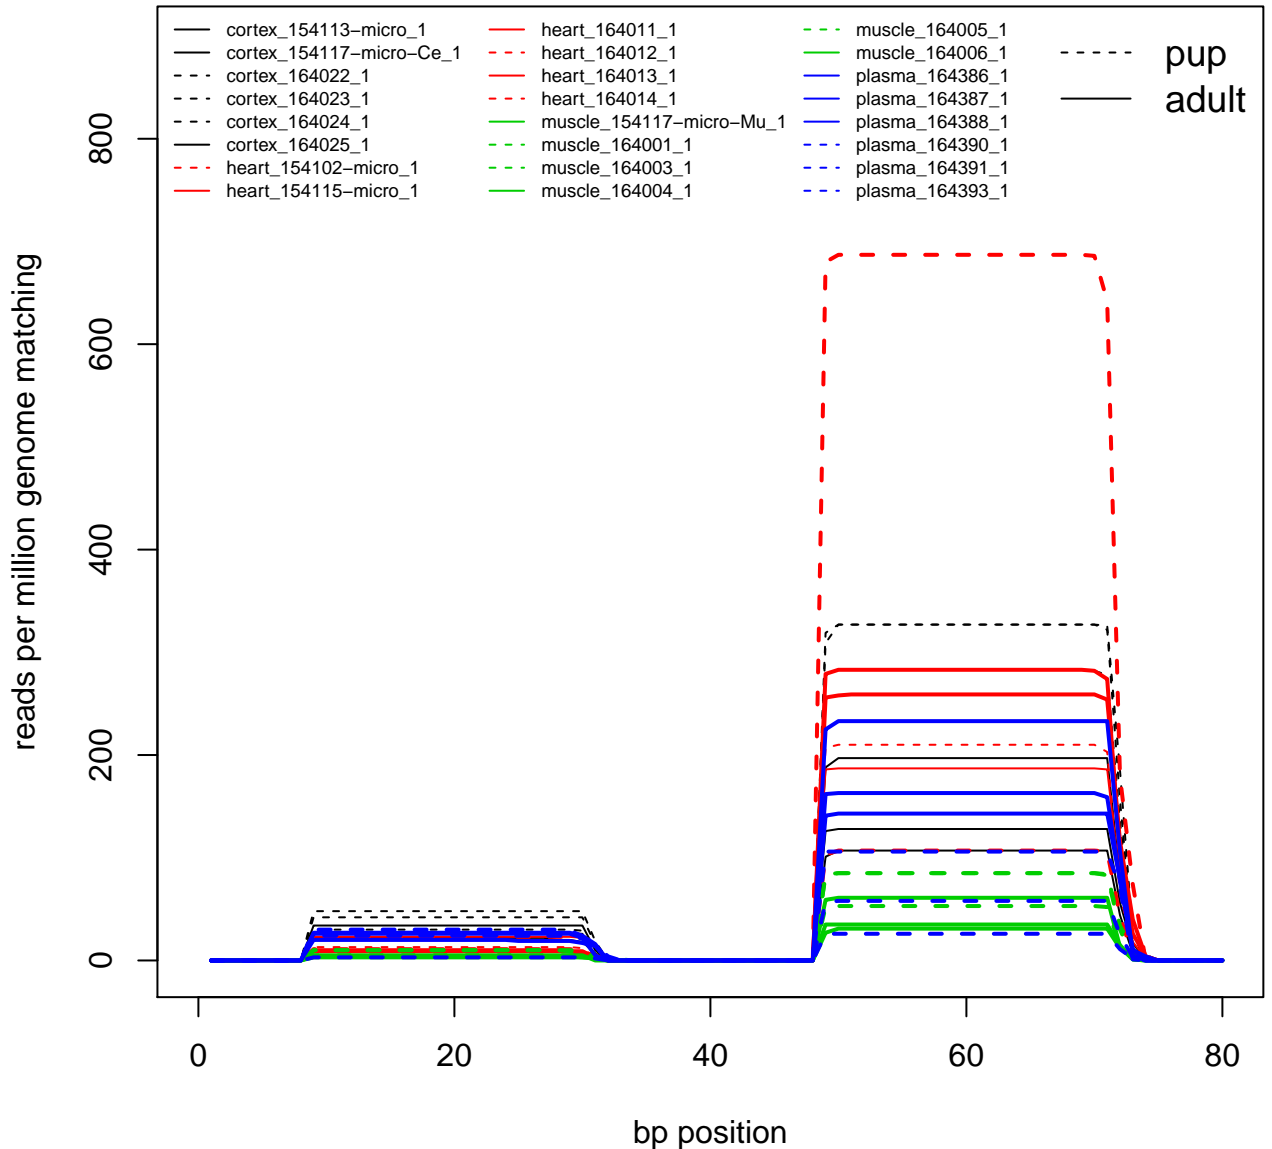

# lwe-miR-301a\_loc1

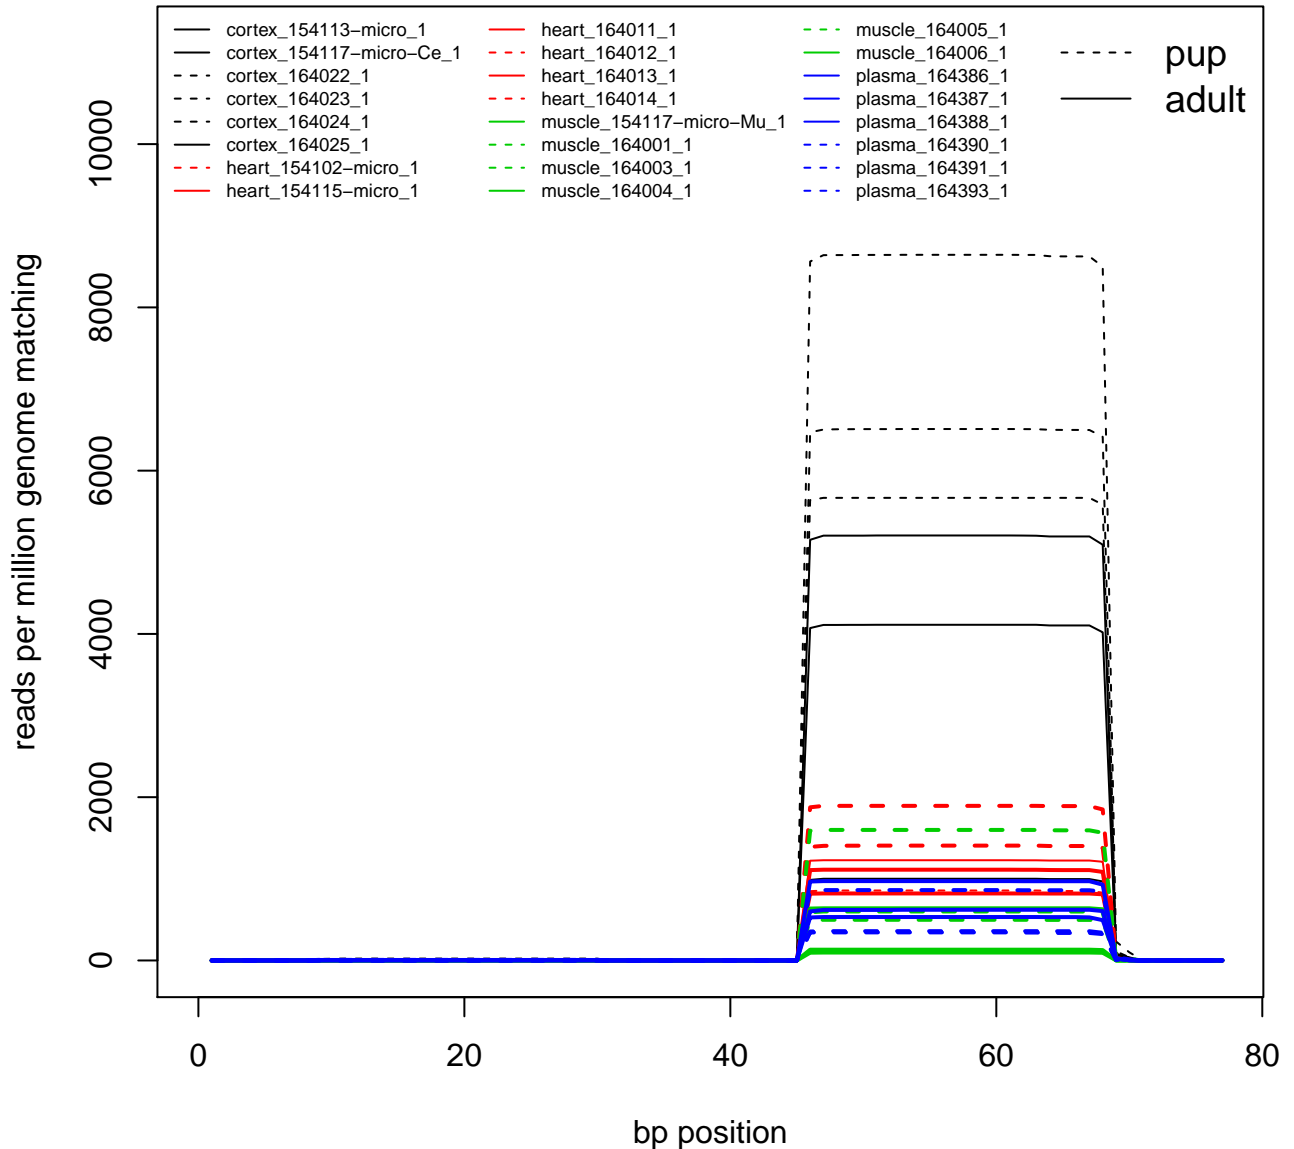



# novel\_42

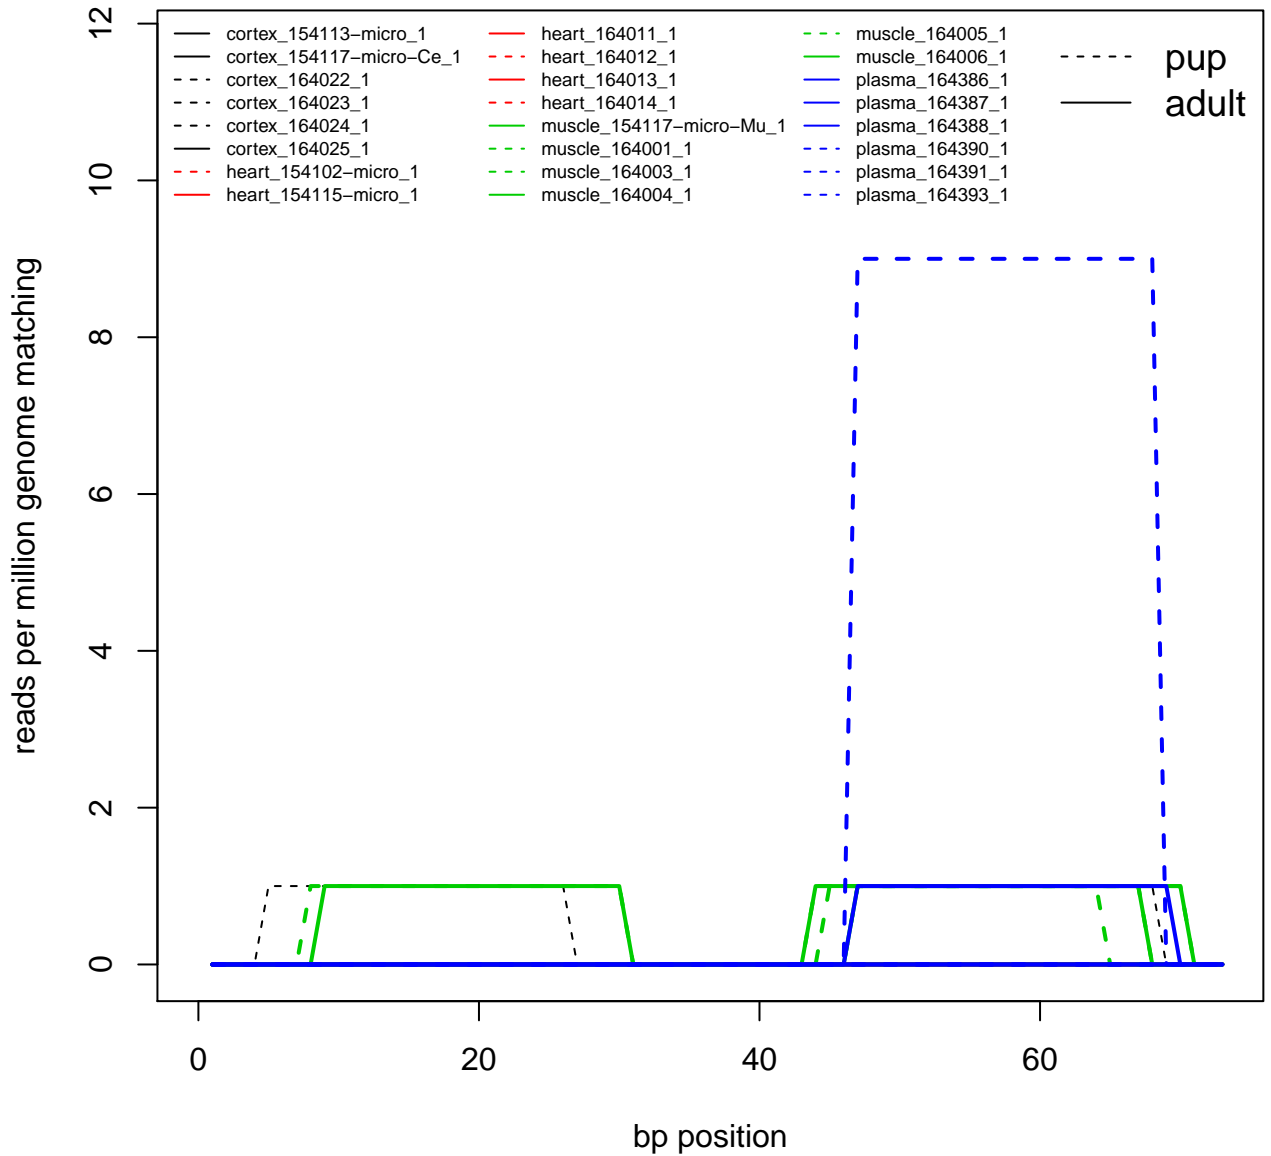



# novel\_43

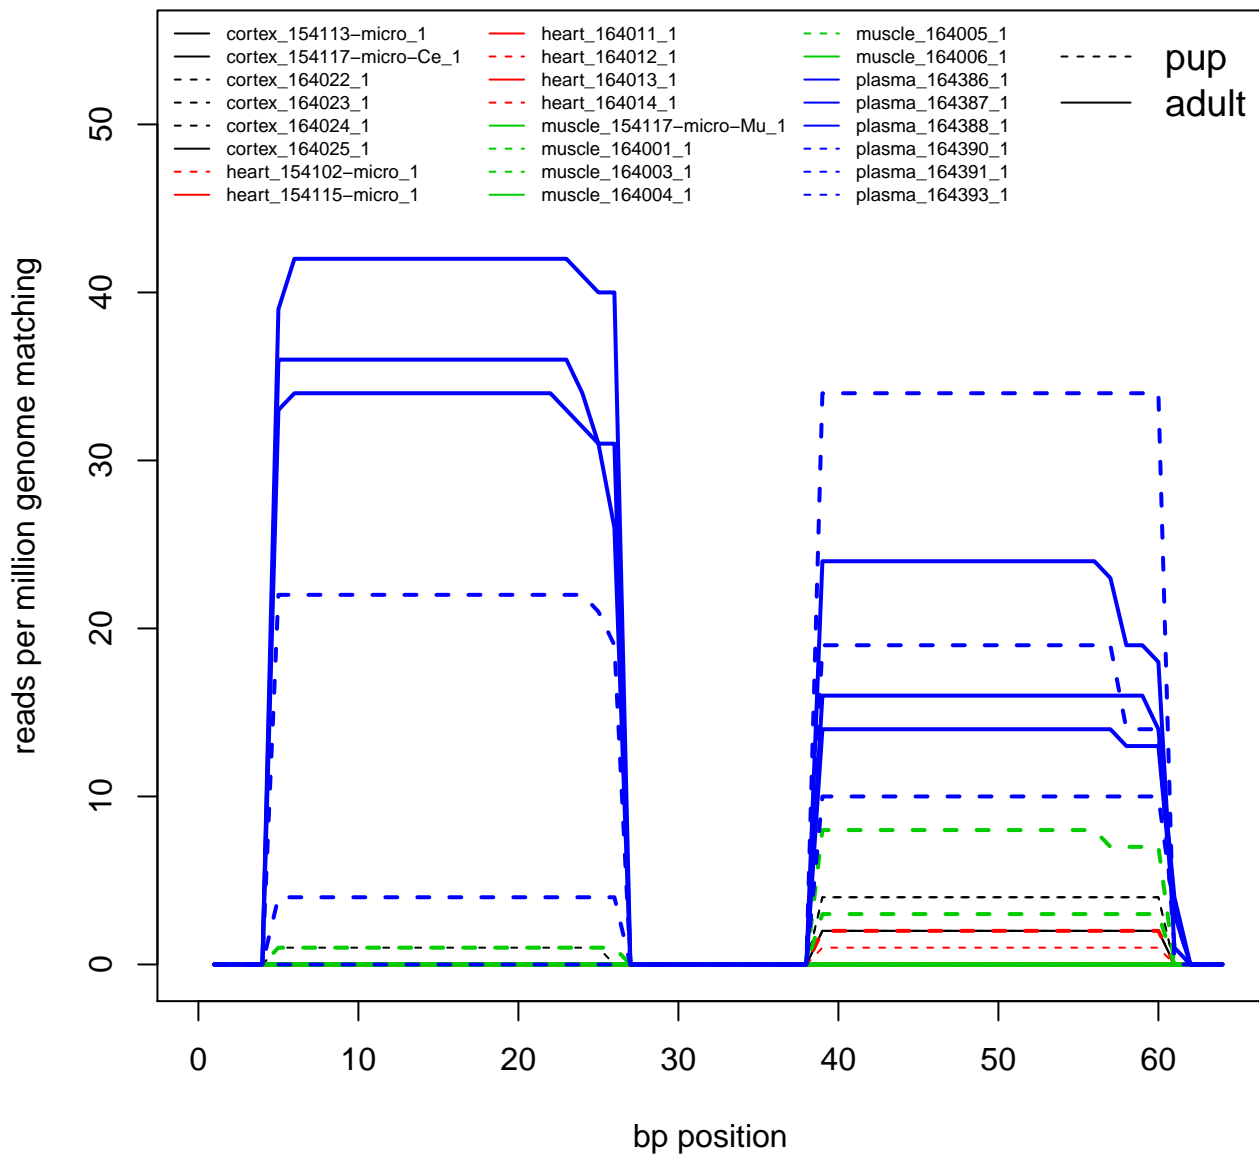



# Iwe-miR-32\_loc1

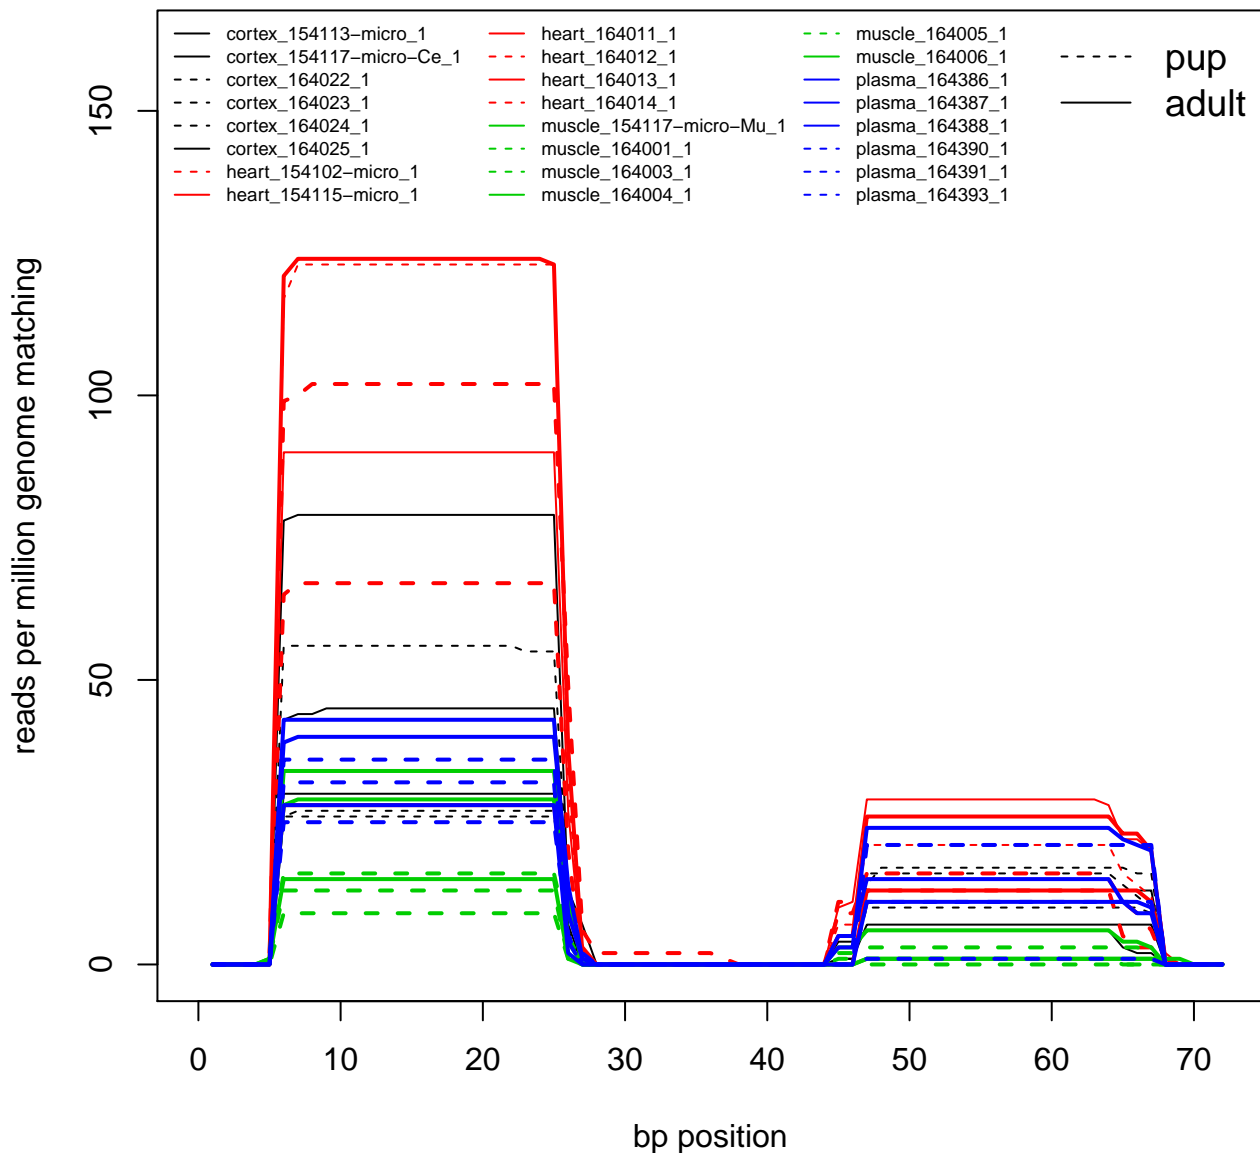

# novel\_45

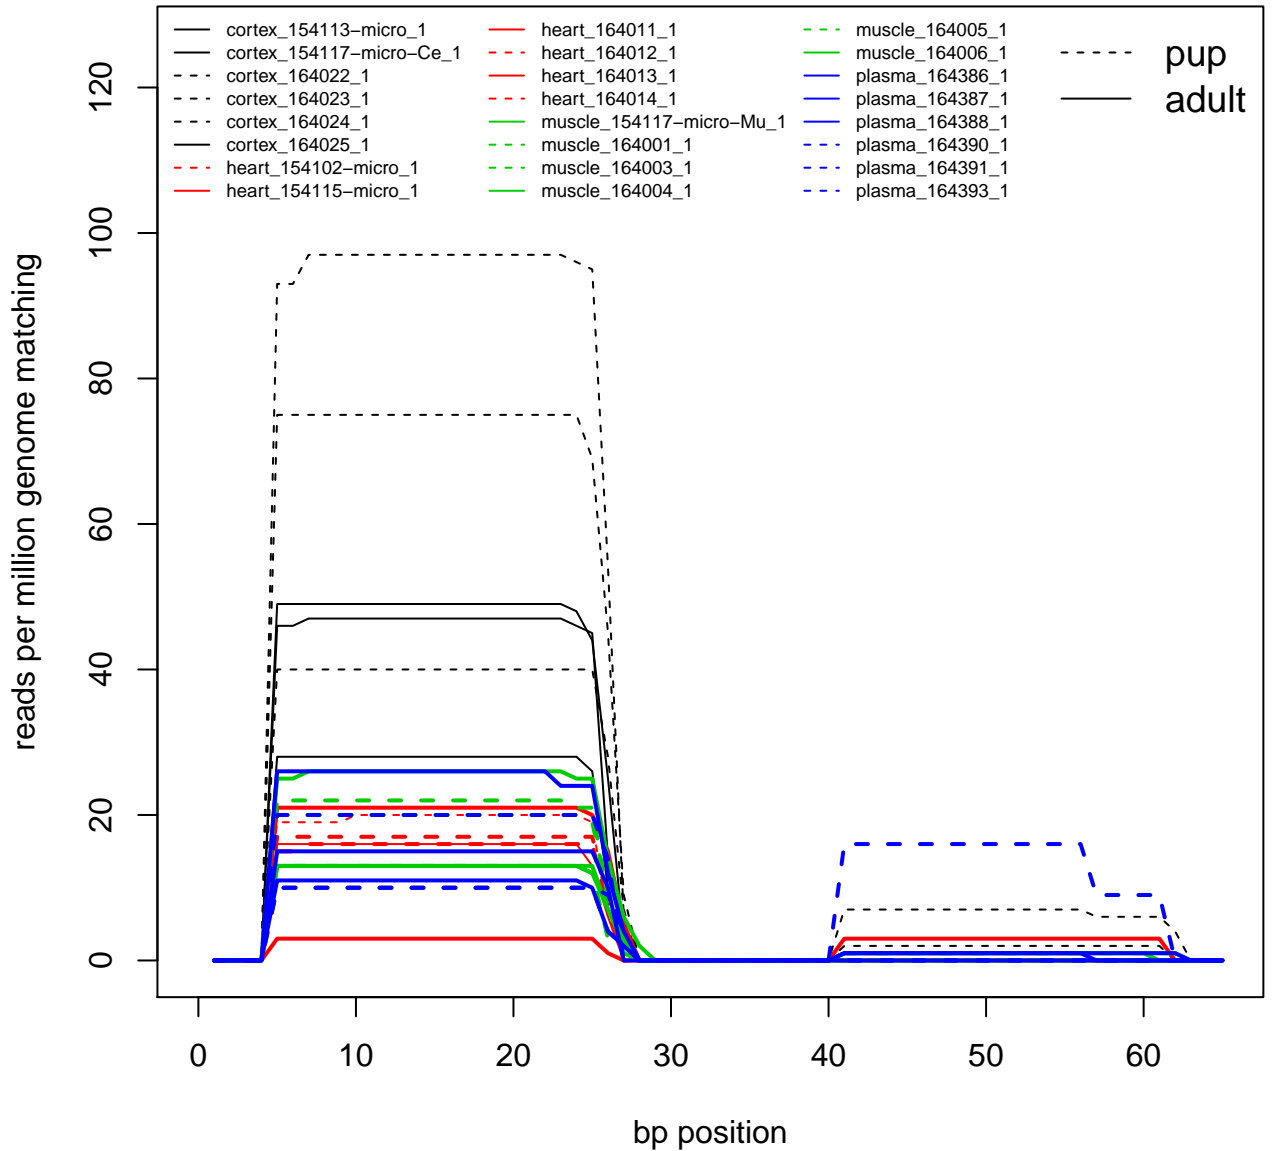



# lwe-miR-8859a\_loc1

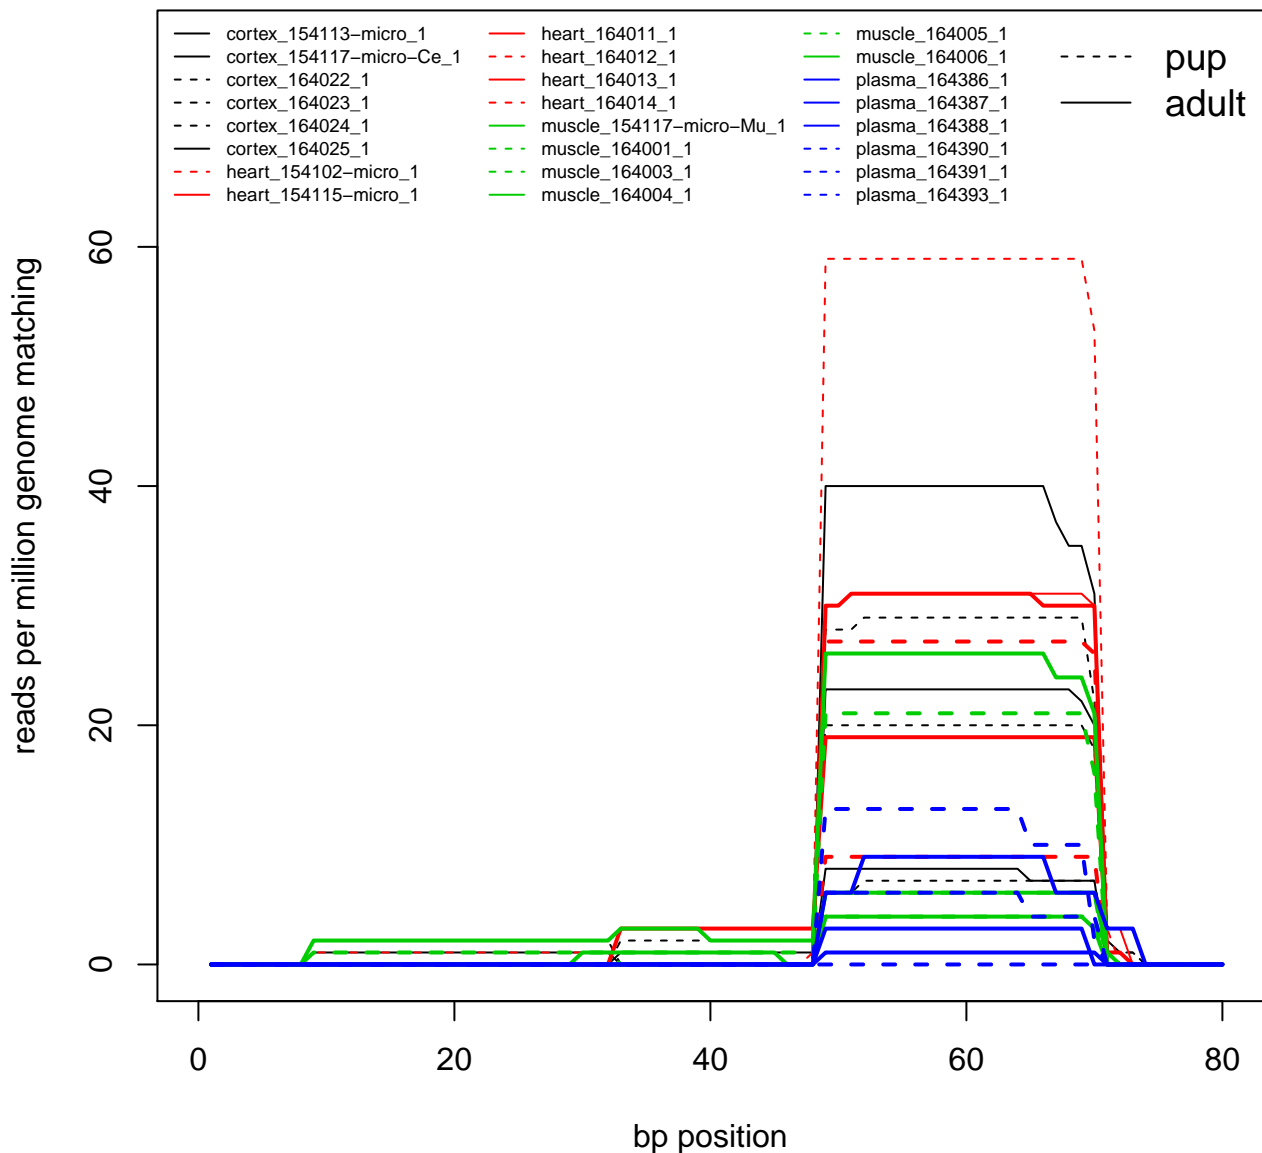



# lwe-miR-8859b\_loc1

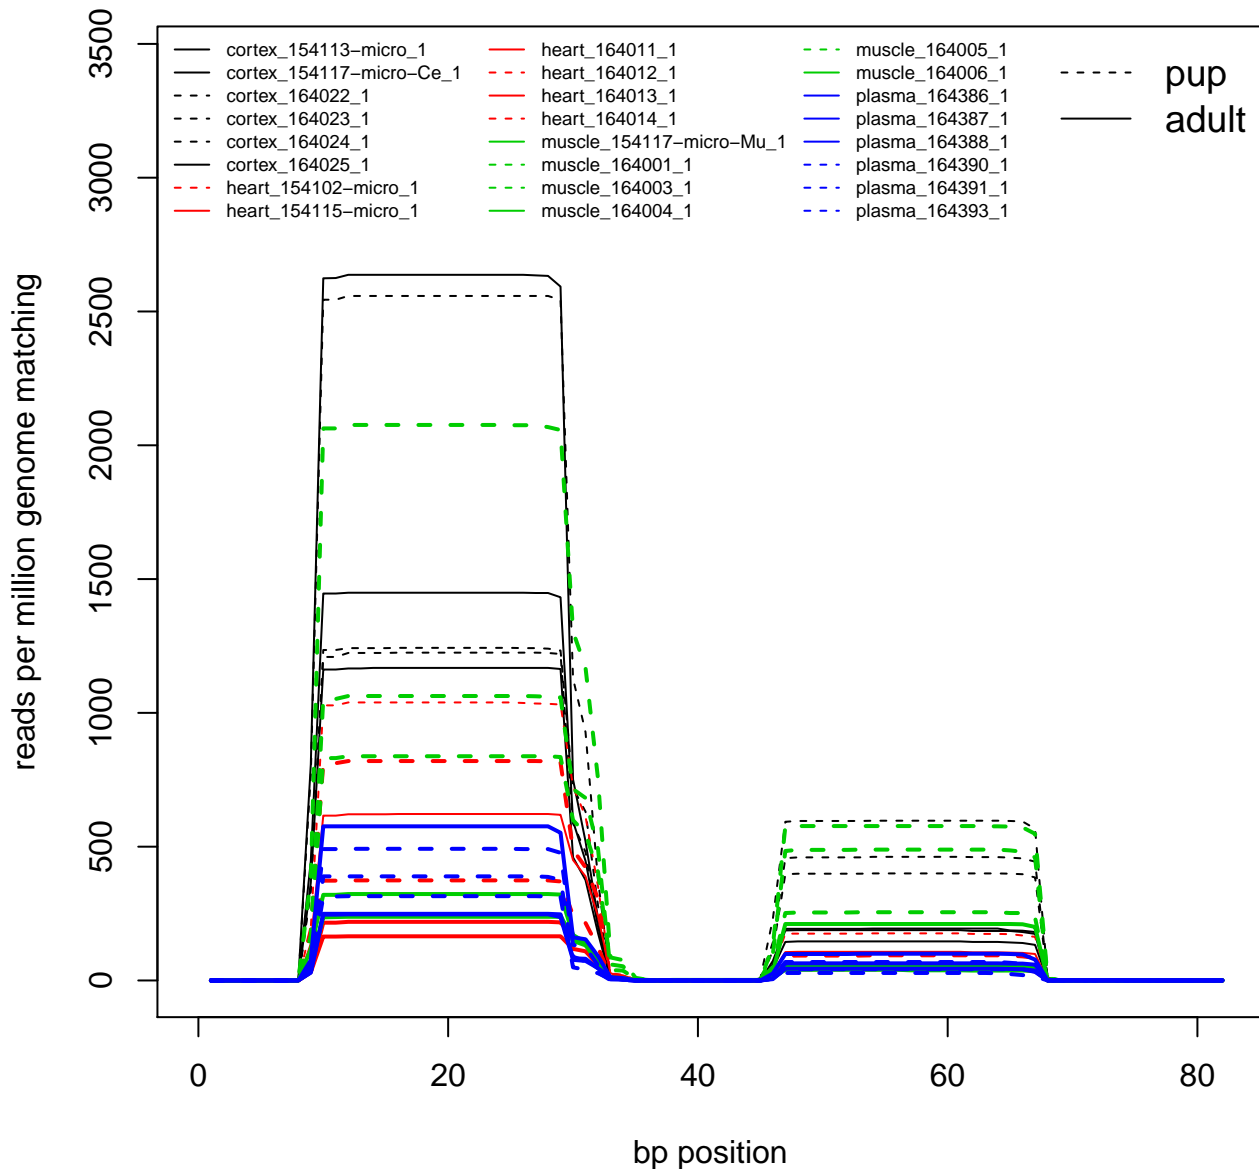

# novel\_46

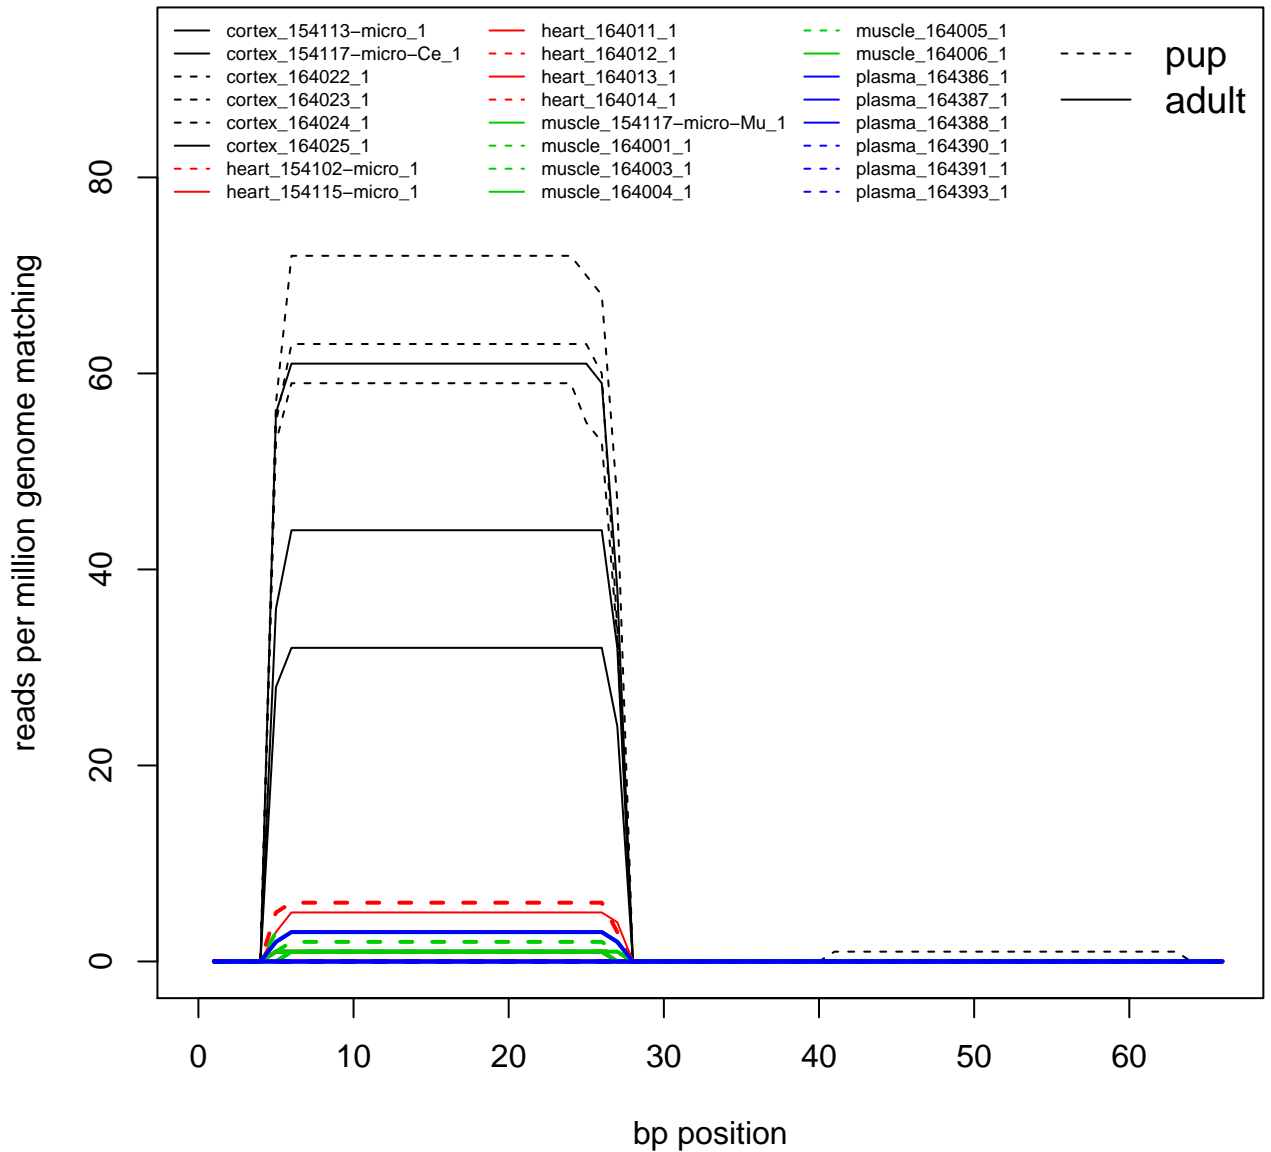



# lwe-miR-105\_loc2

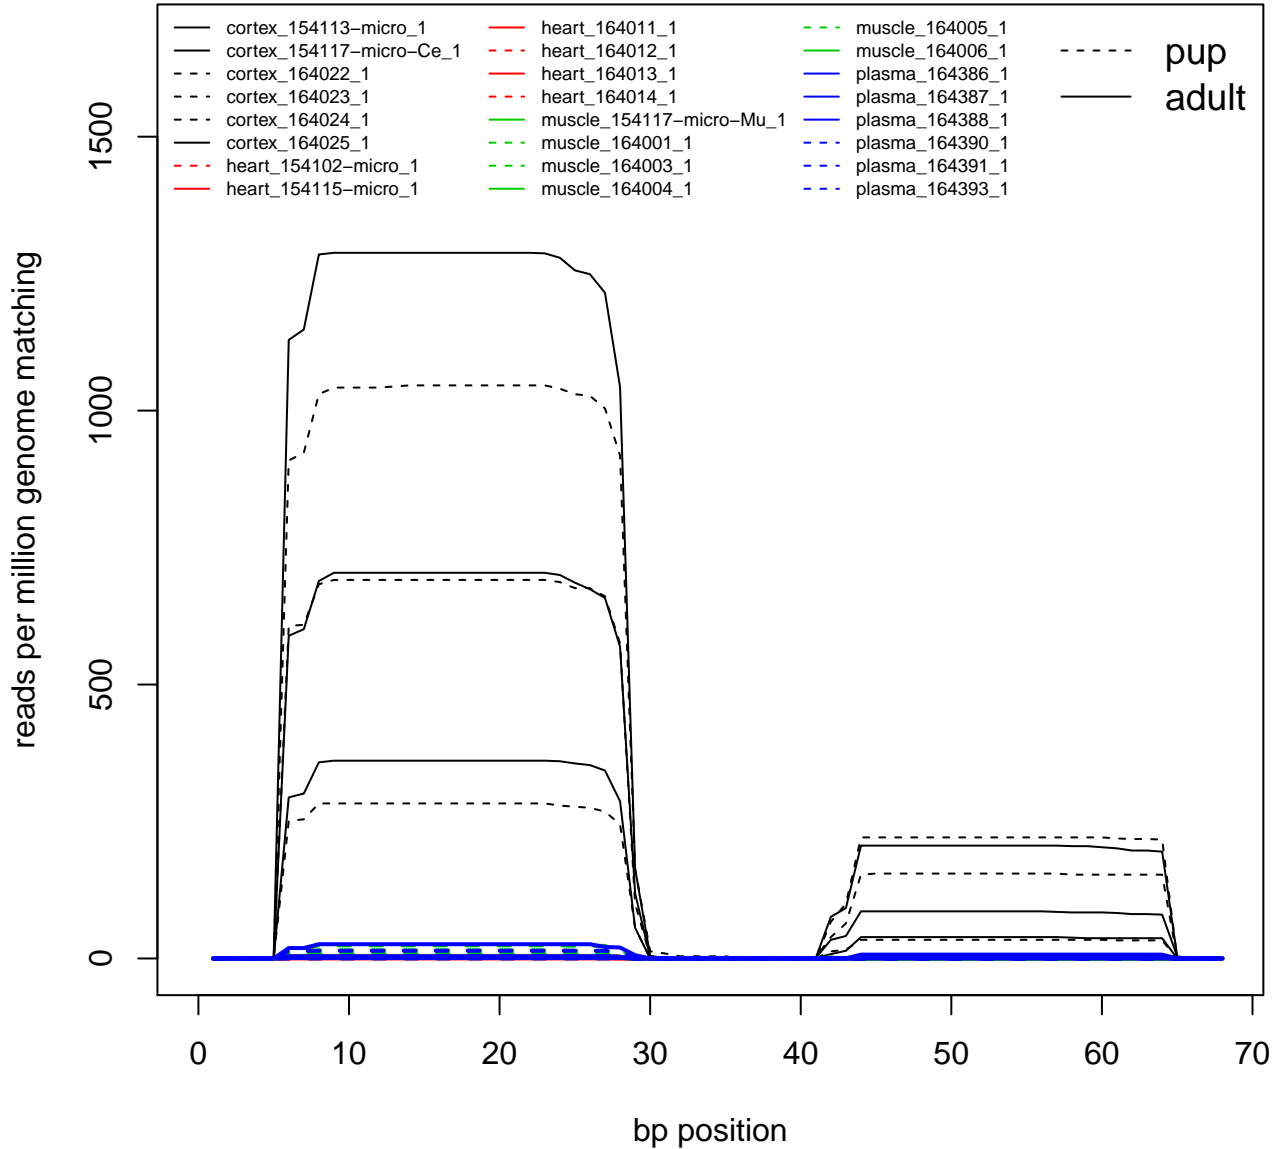

# lwe-miR-224\_loc1

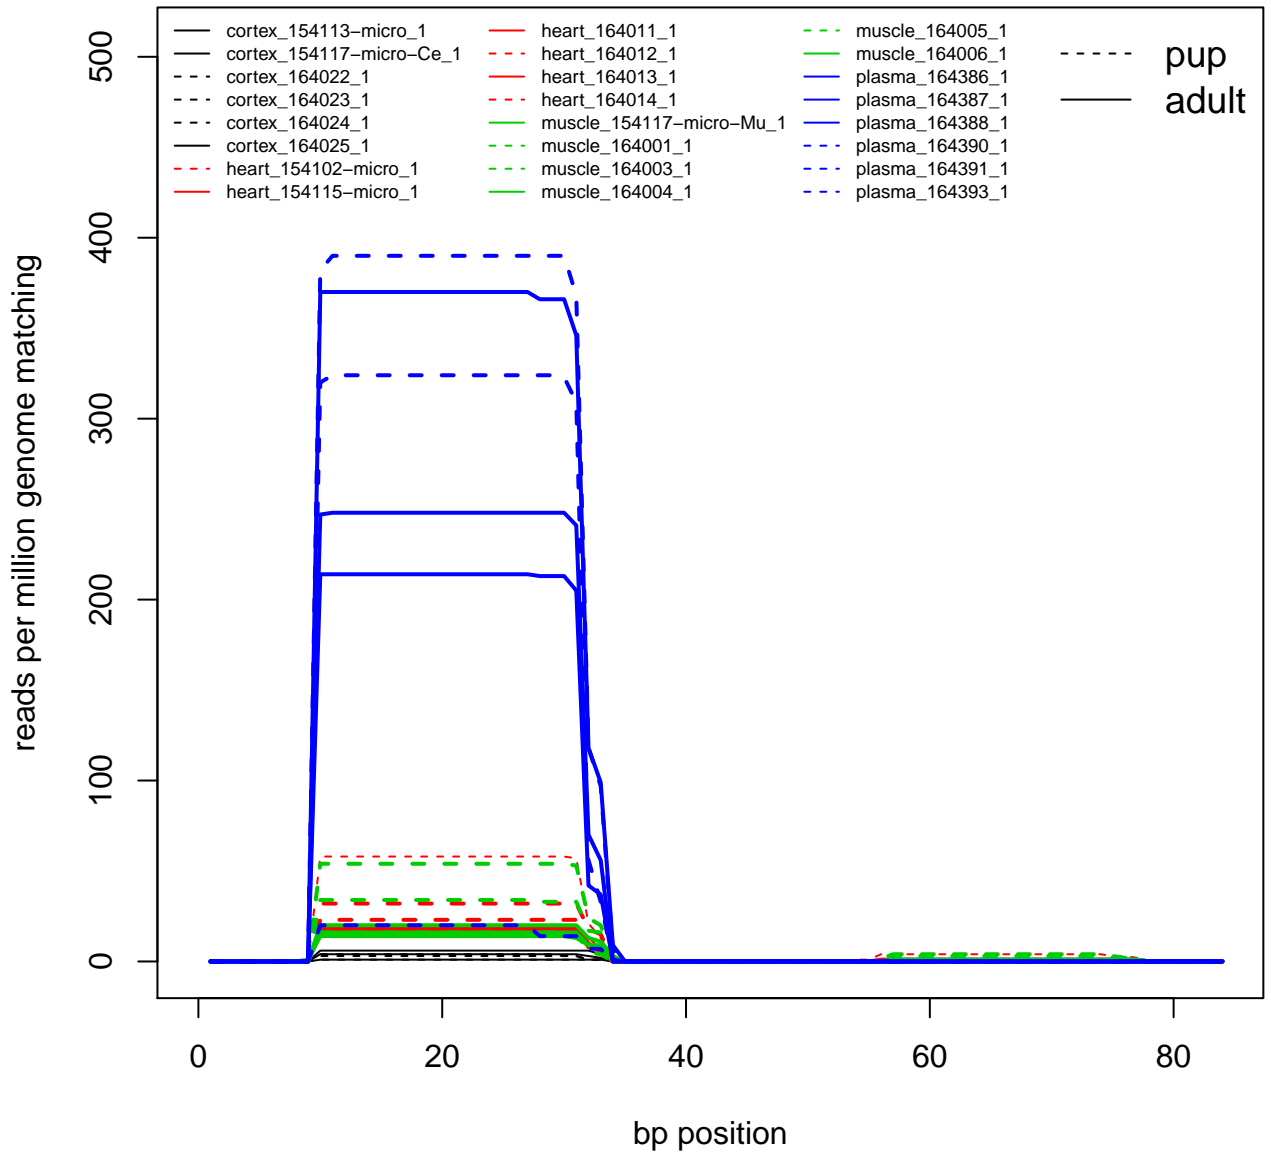

# lwe-miR-452\_loc1

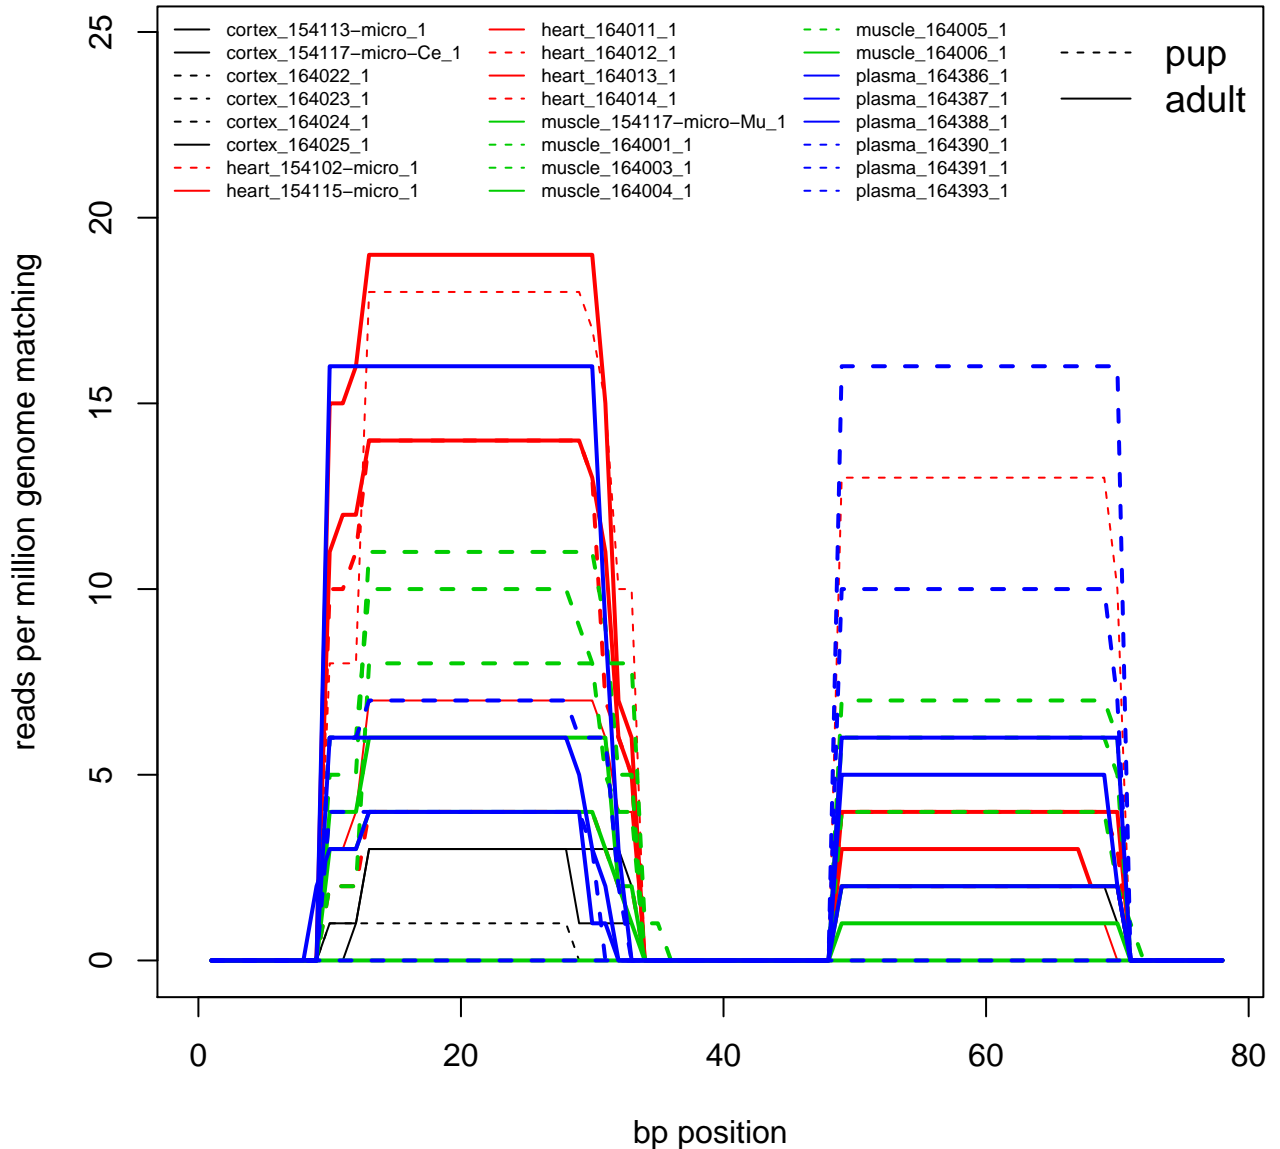

# novel\_47

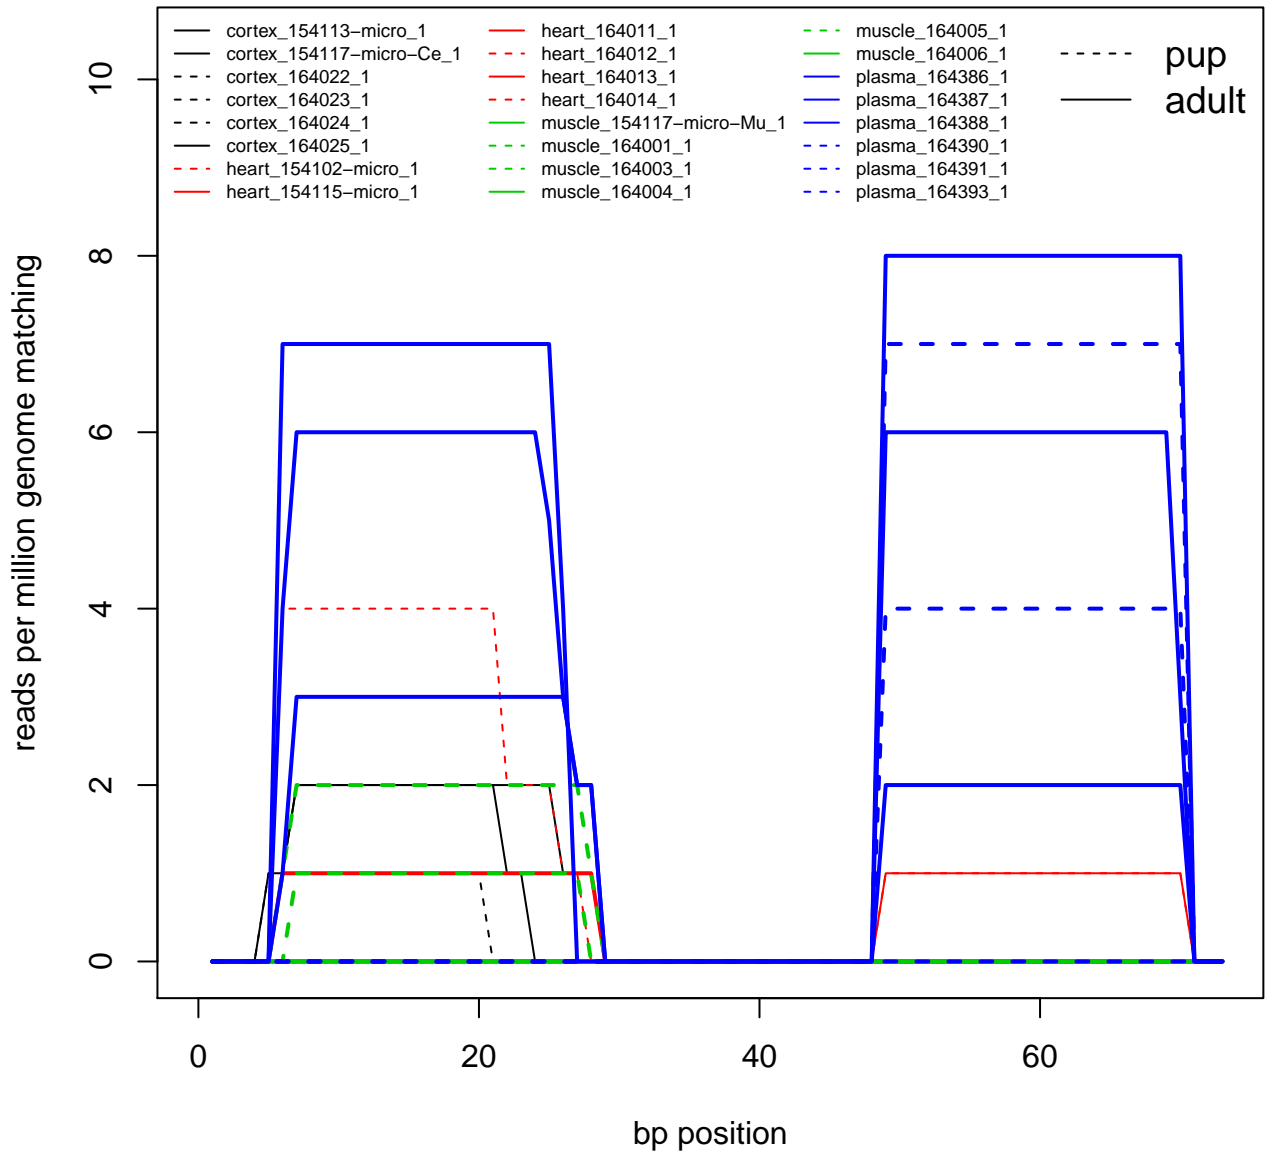

# lwe-miR-9b\_loc2

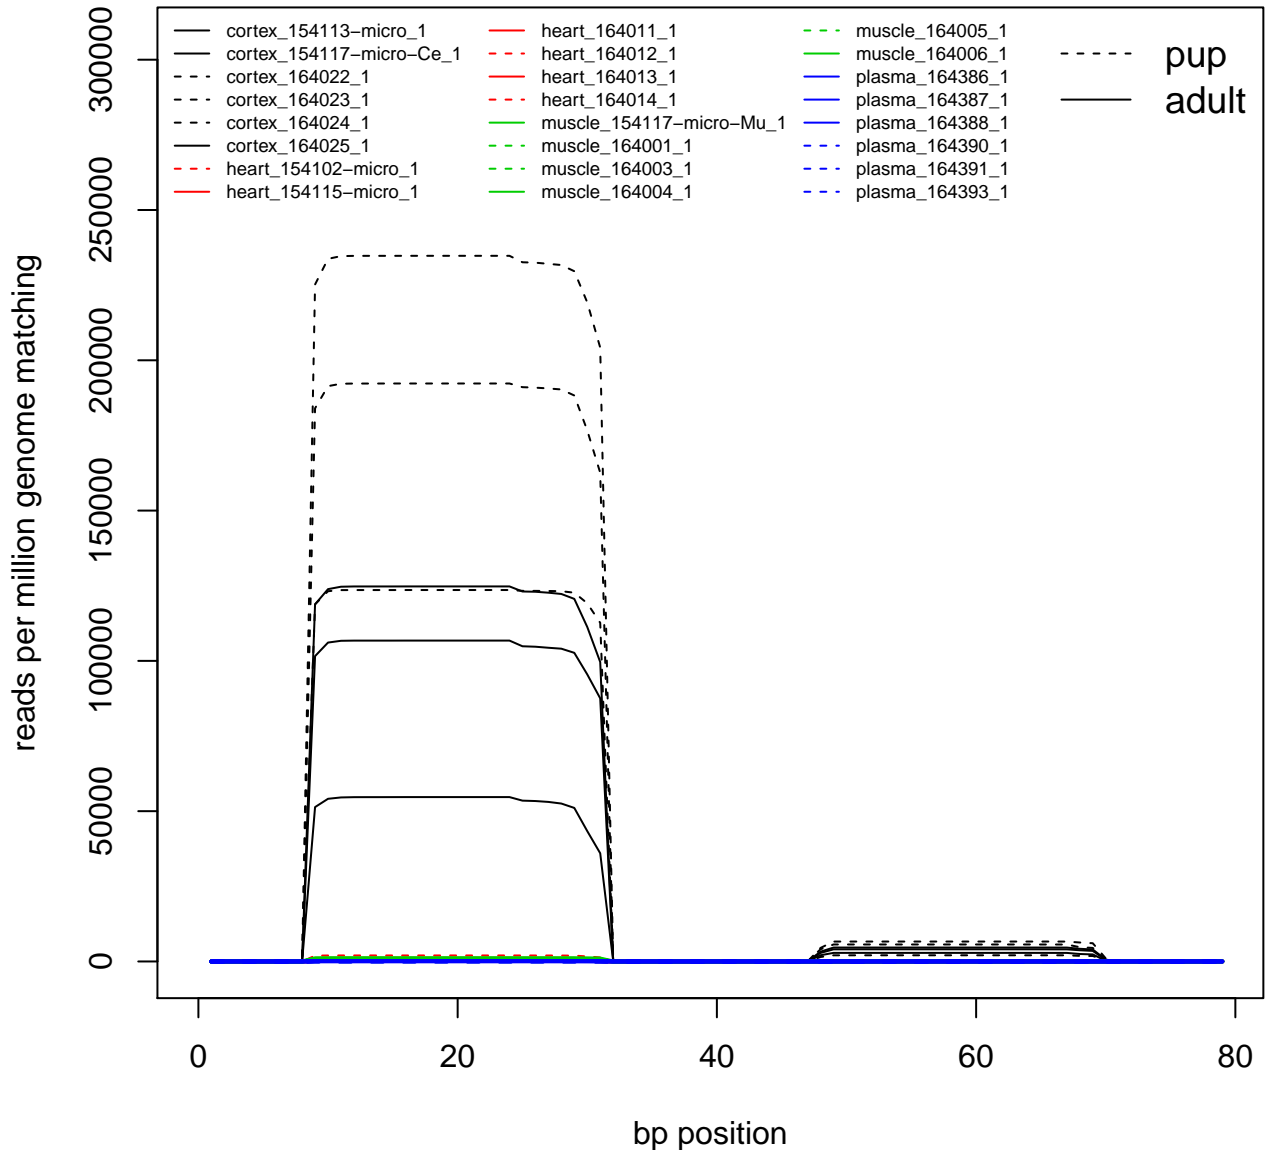





# novel\_49

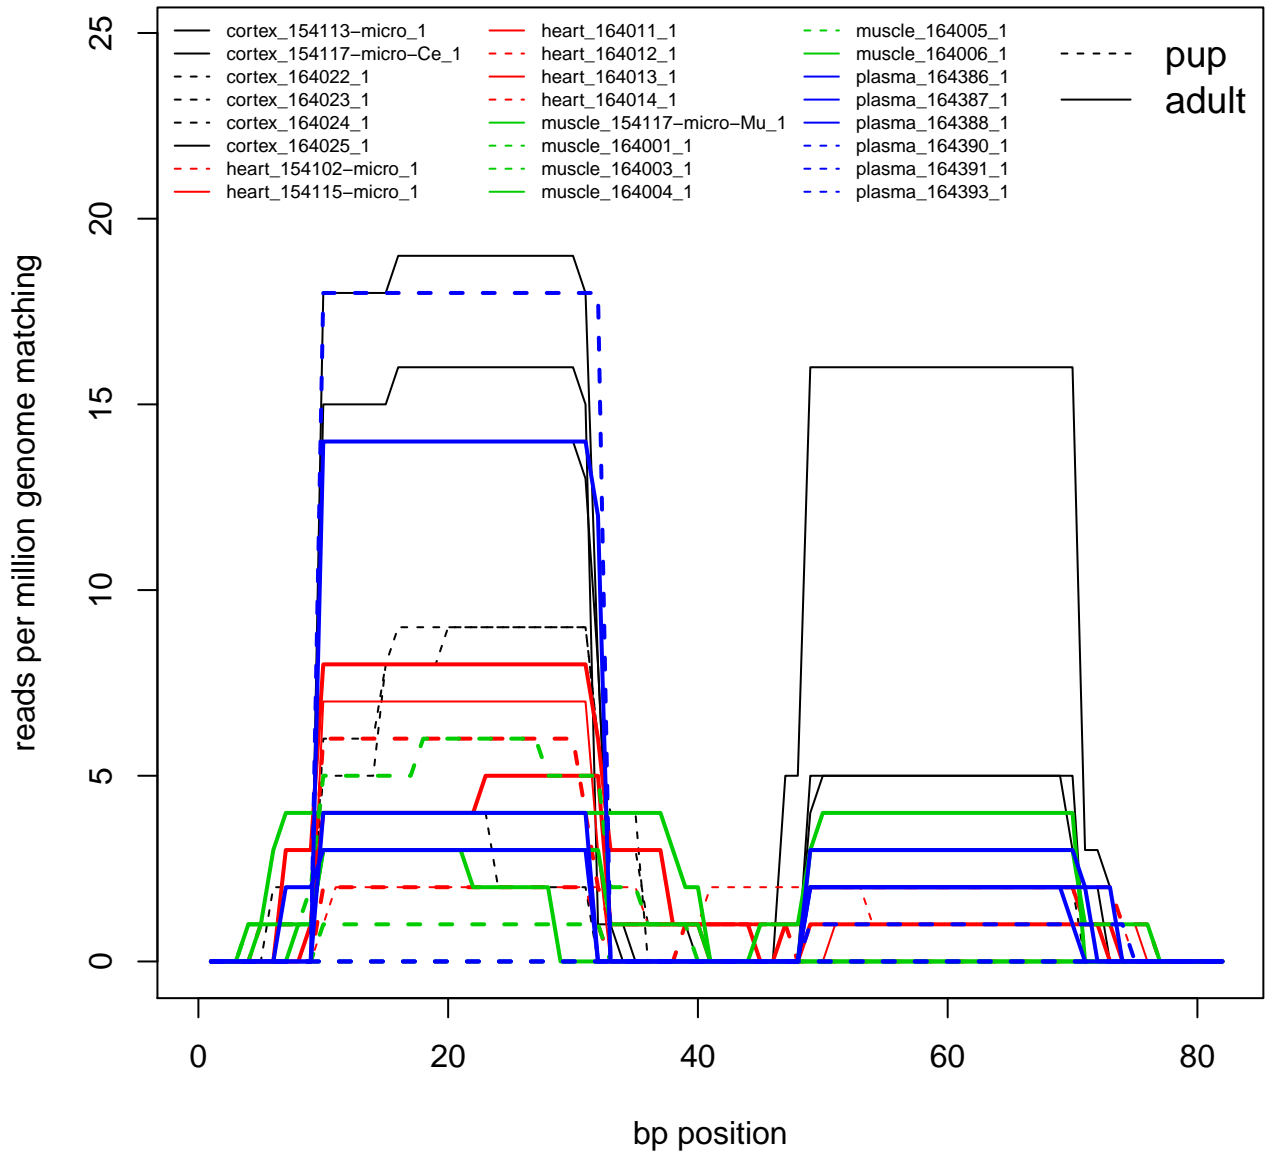

# lwe-miR-135\_loc2

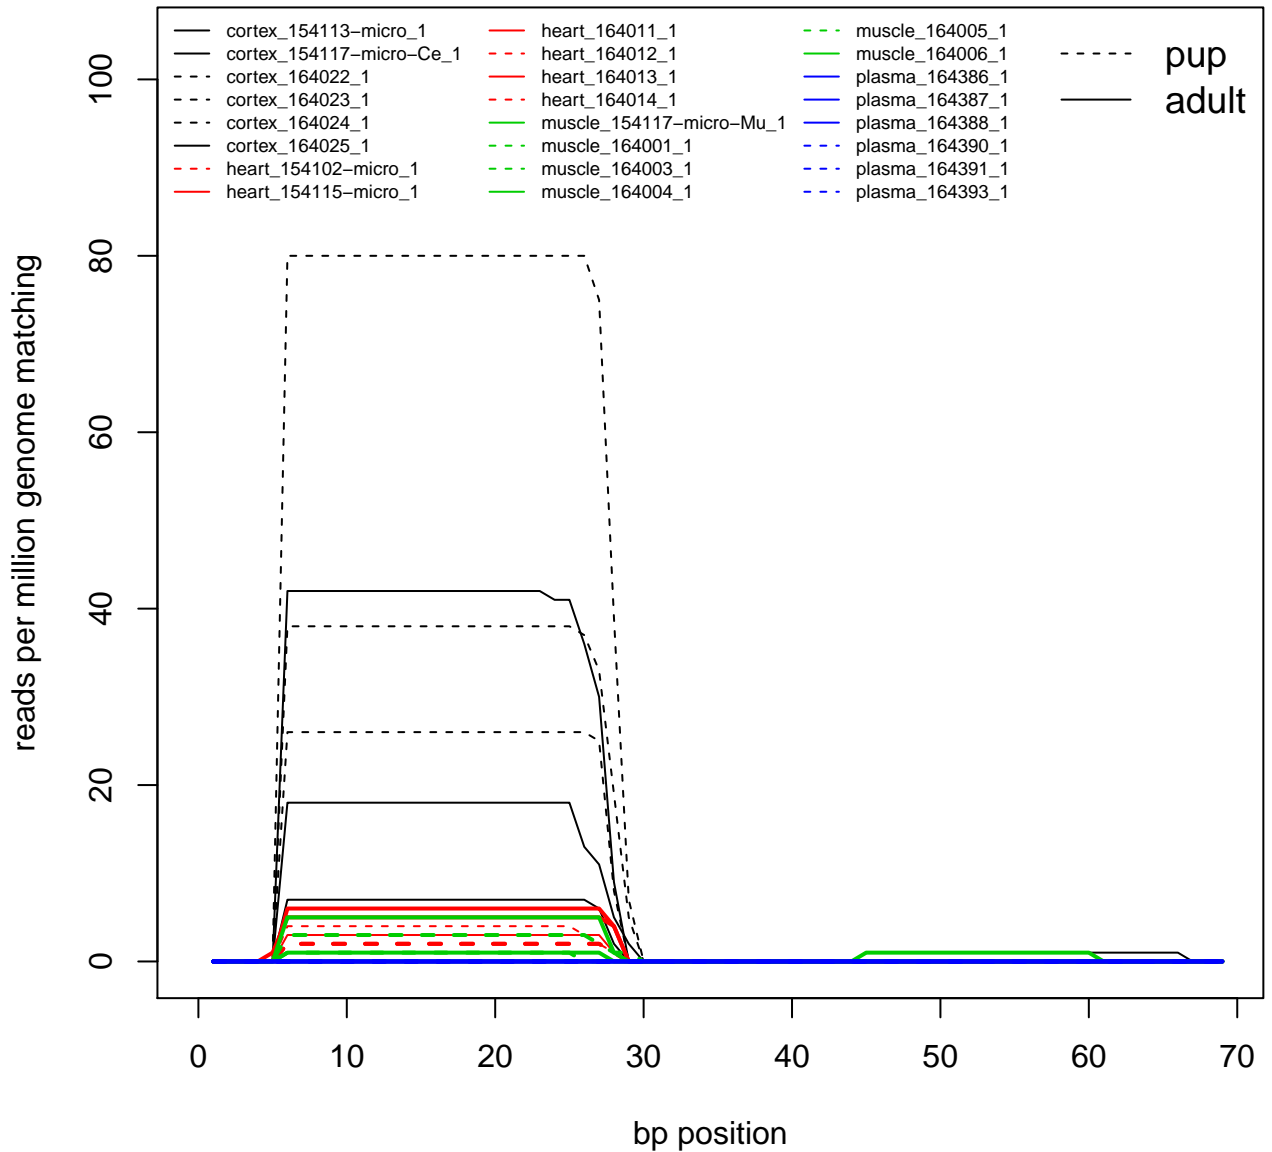

# lwe-miR-16\_loc1

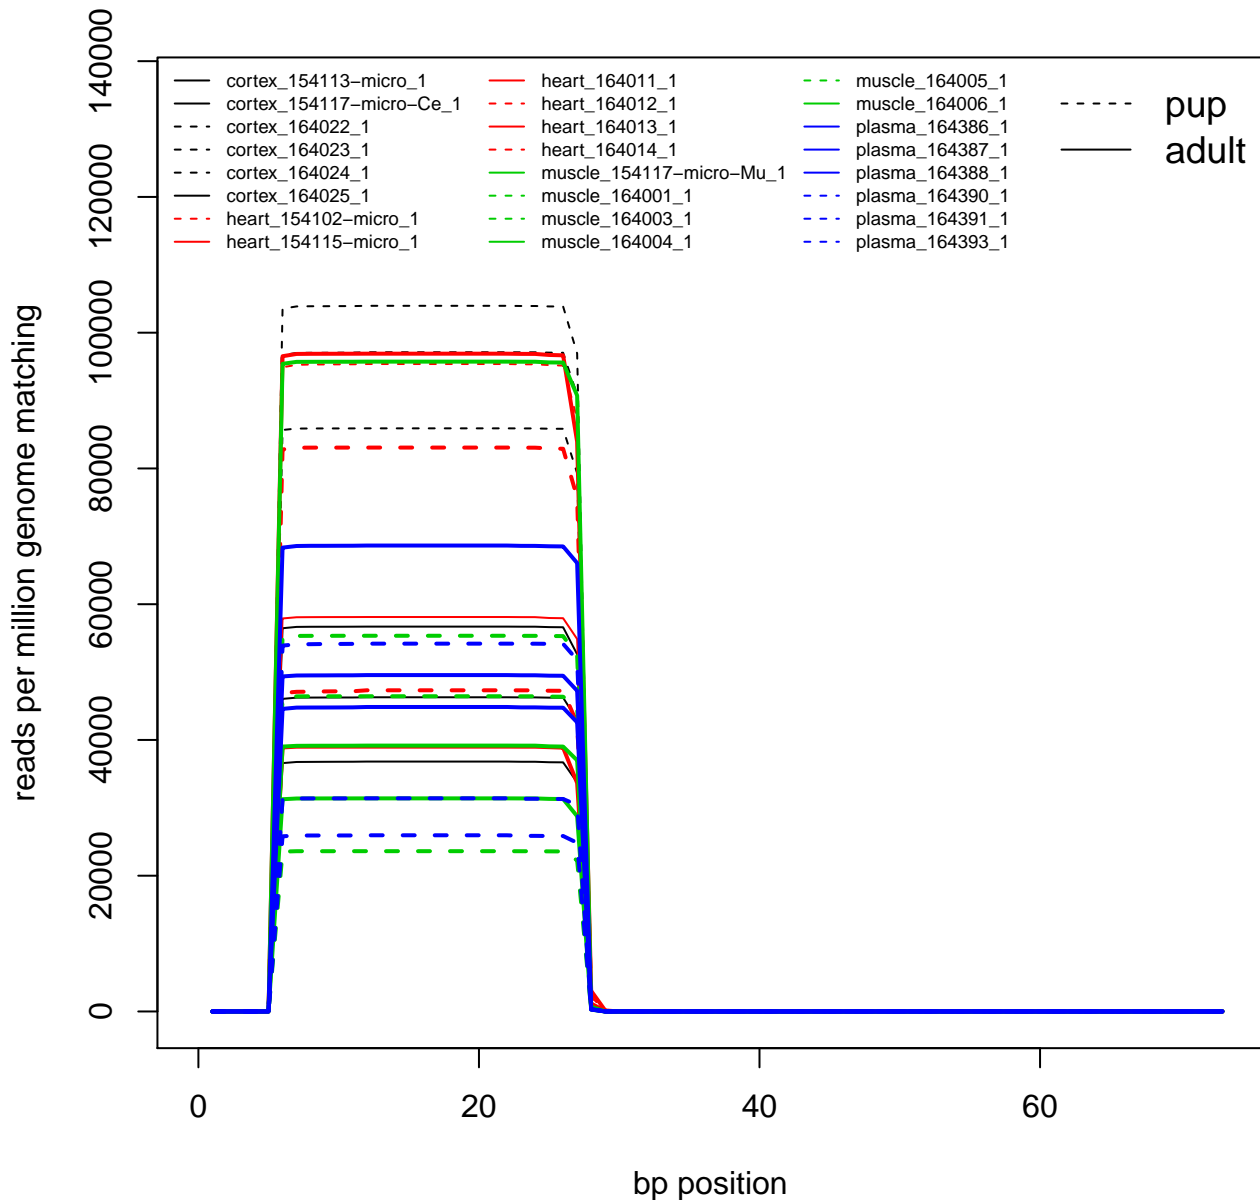

# lwe-miR-3613\_loc1

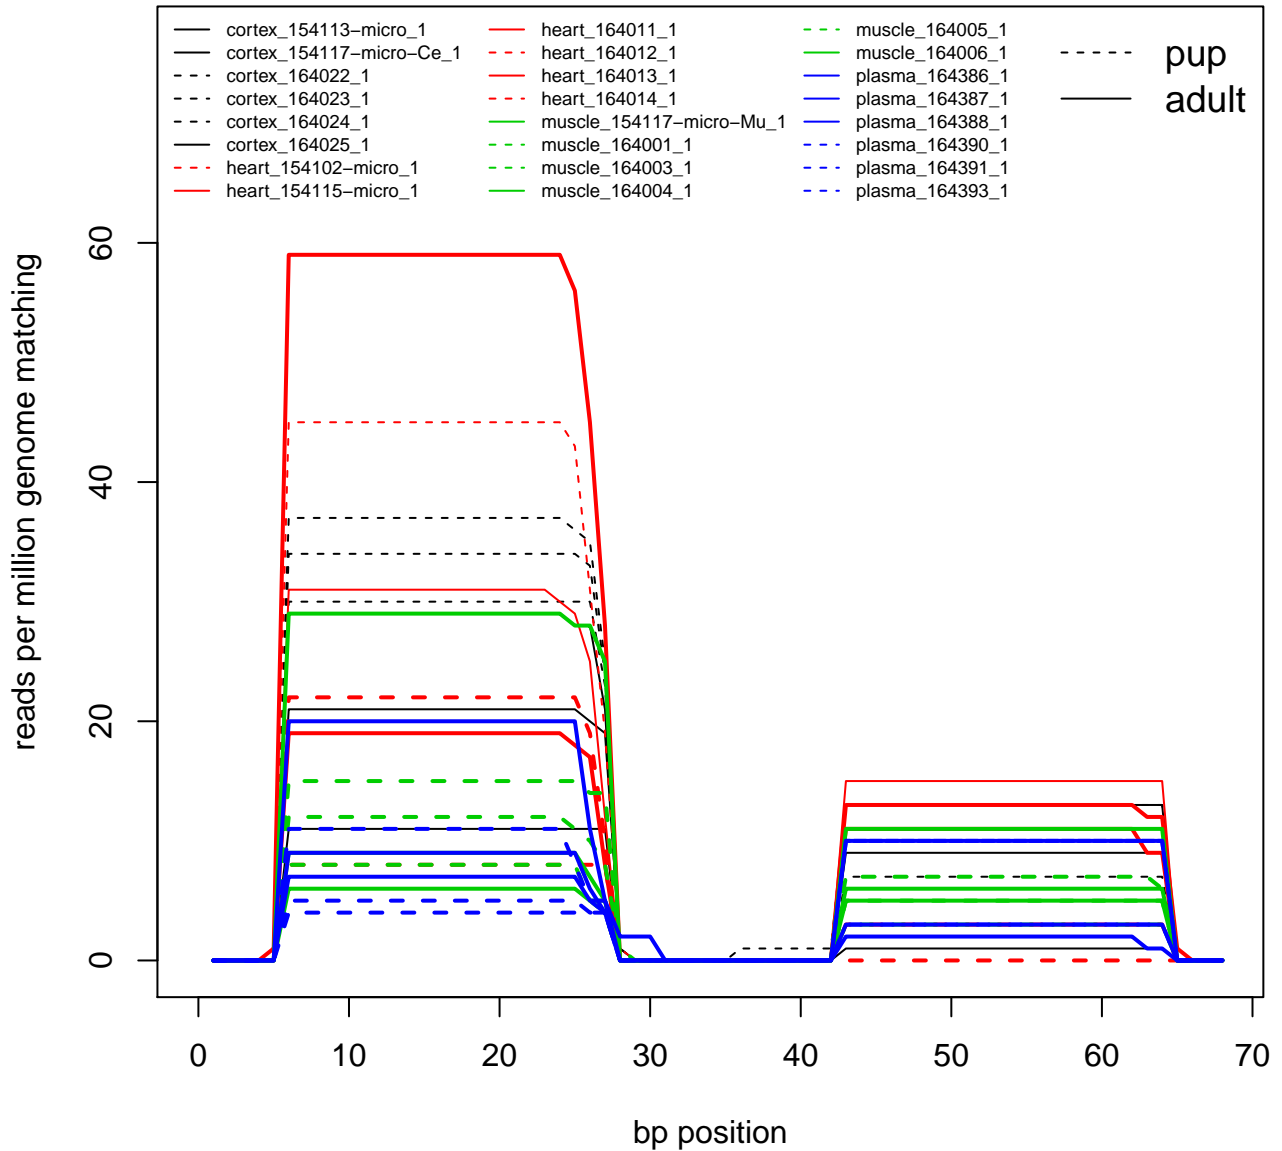

# lwe-miR-339\_loc1

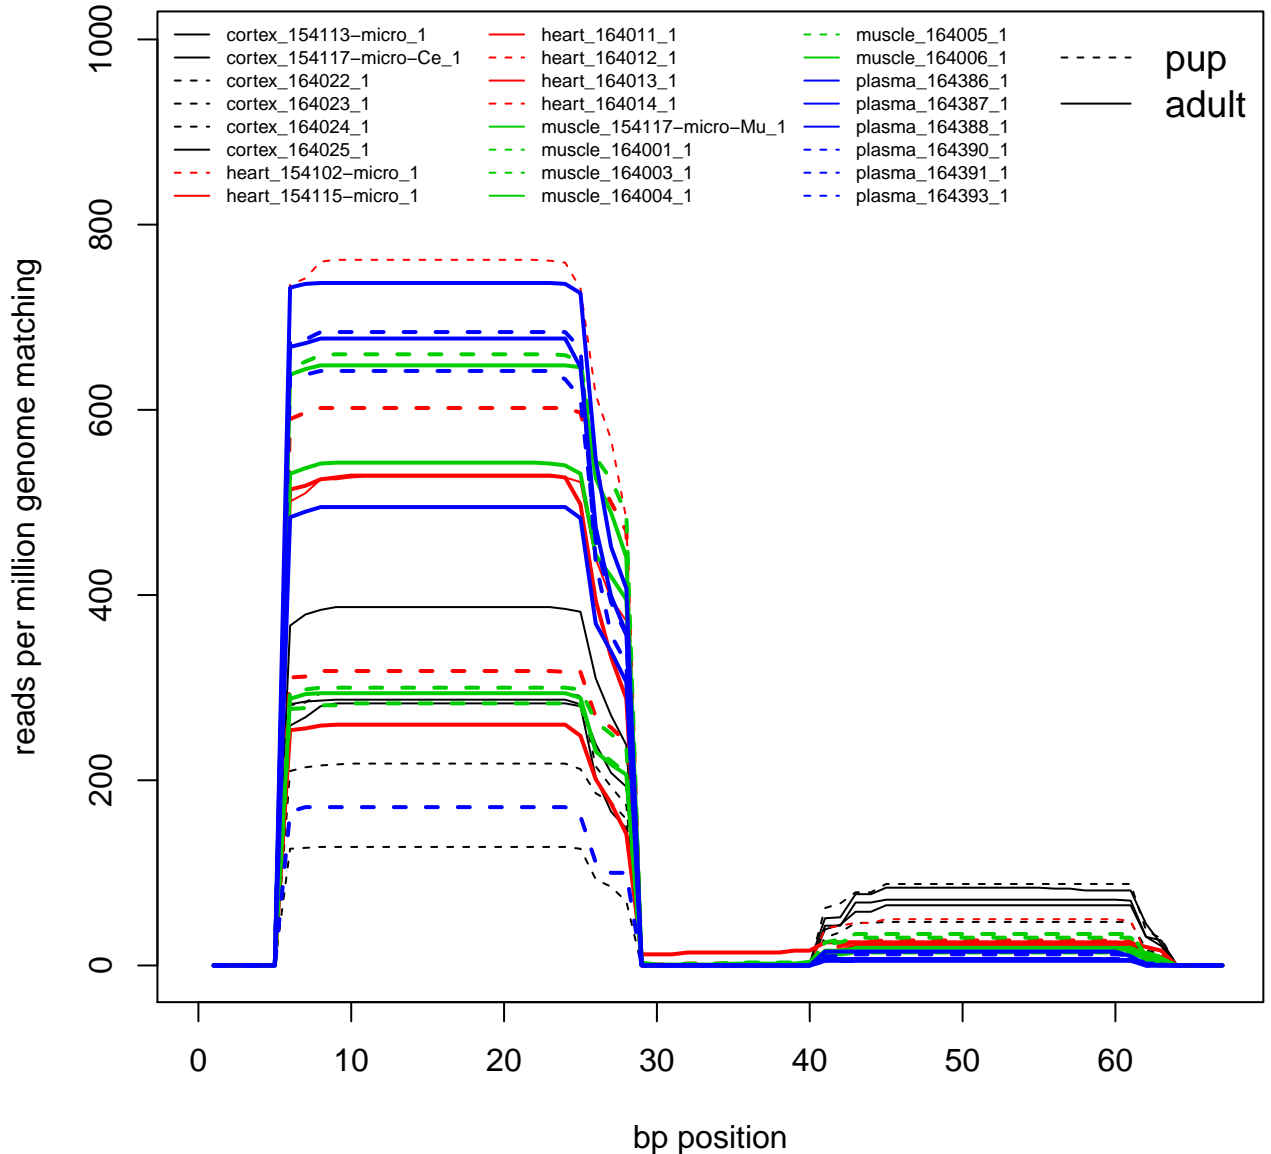

# novel\_51

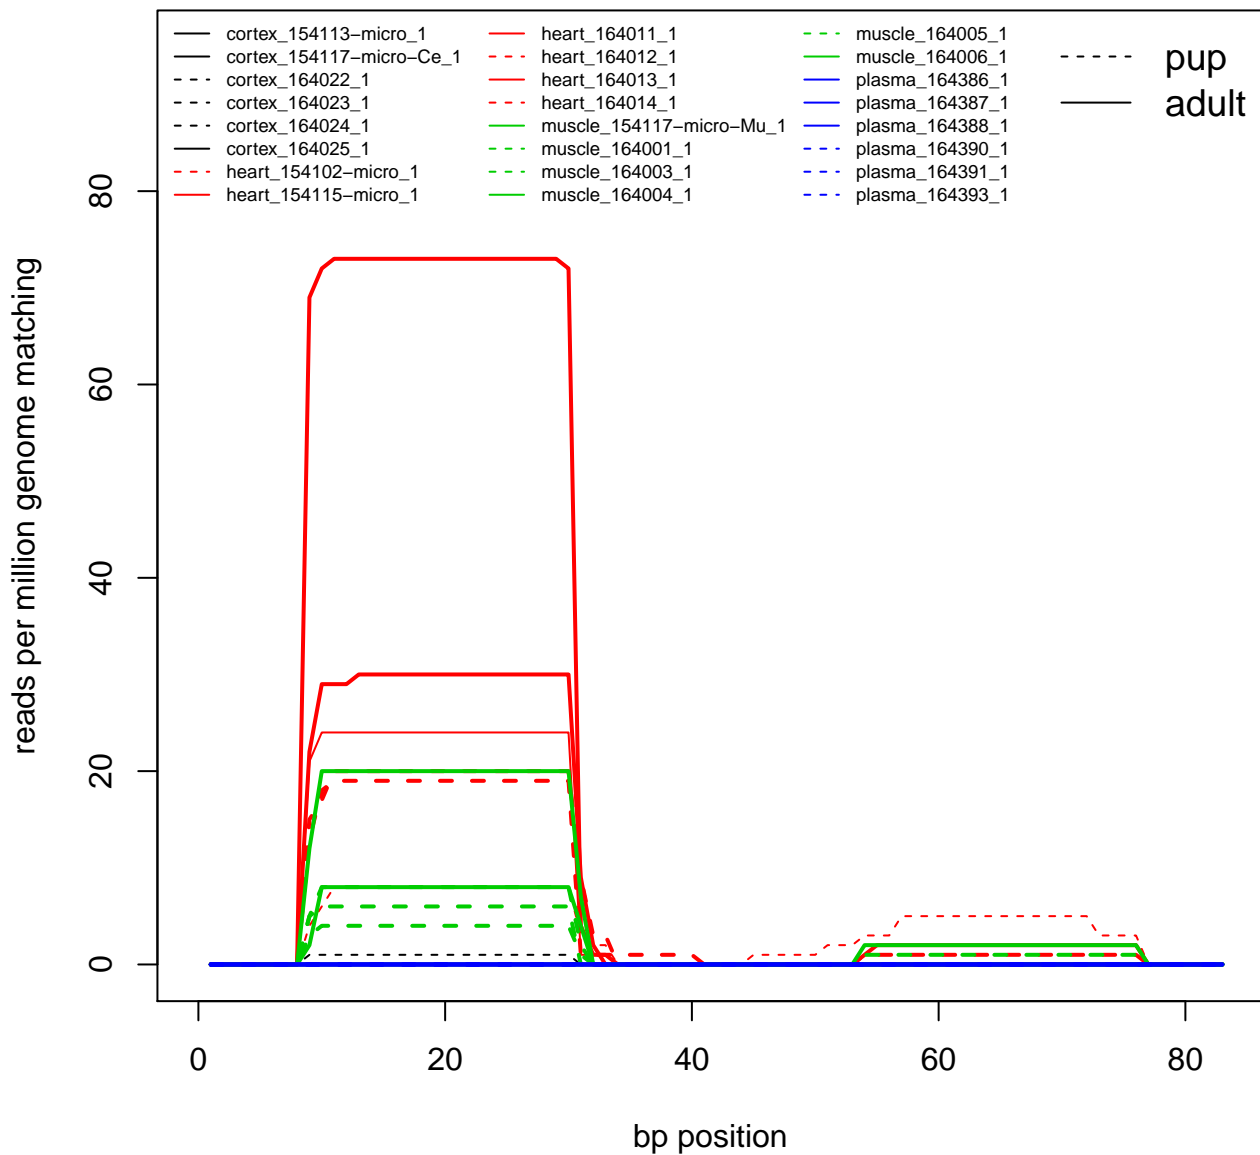

# lwe-miR-935\_loc1

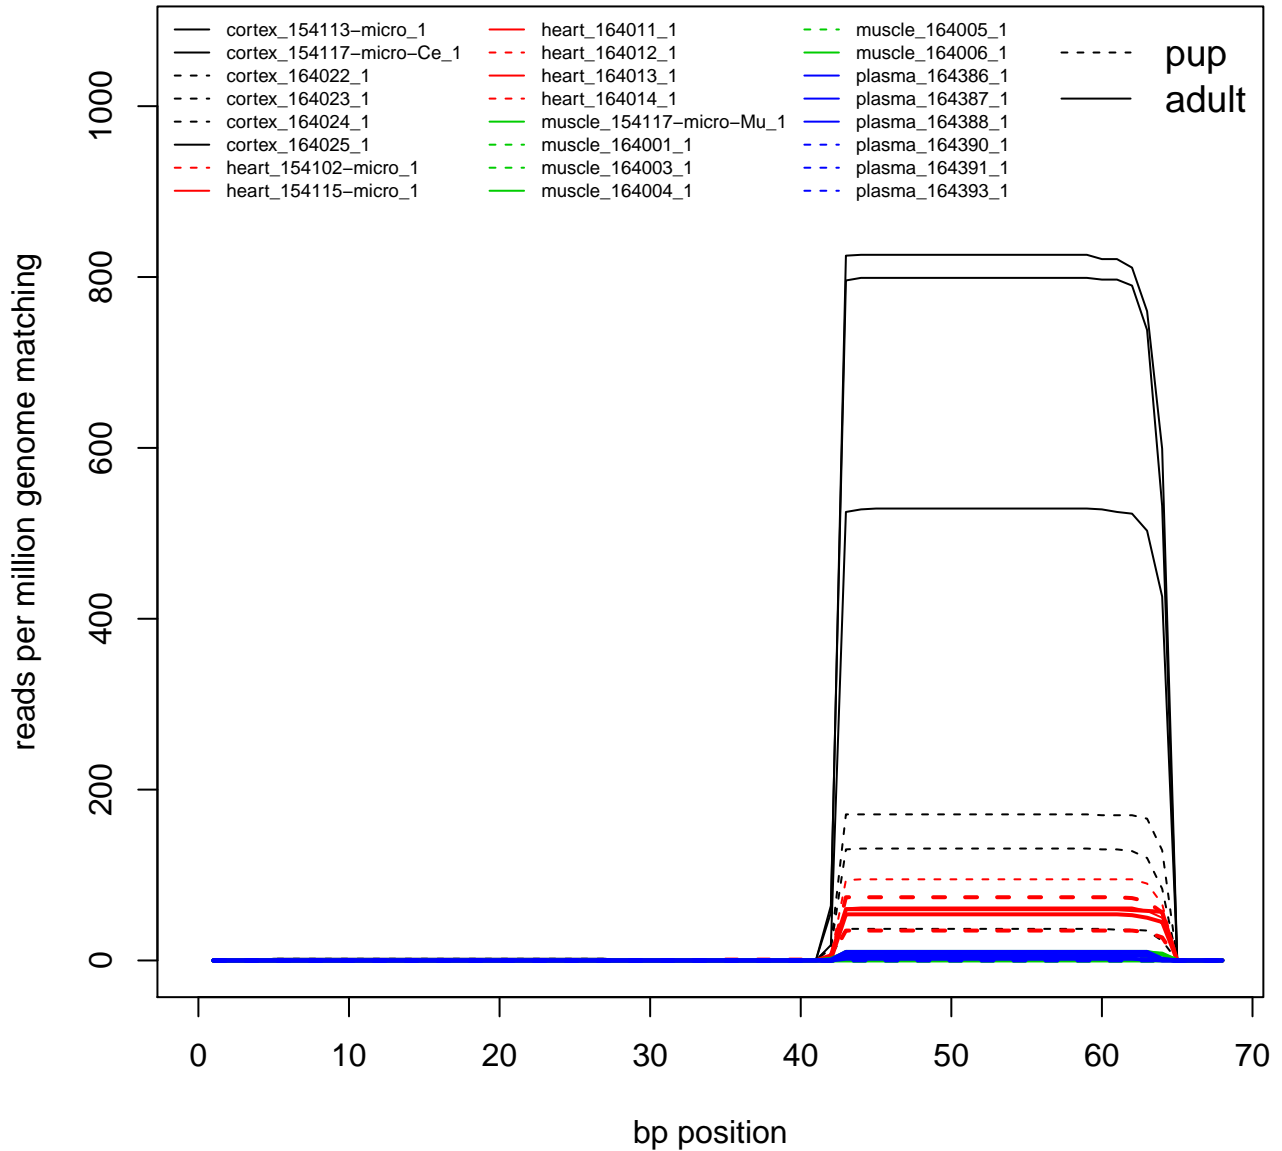







# lwe-miR-506a\_loc1

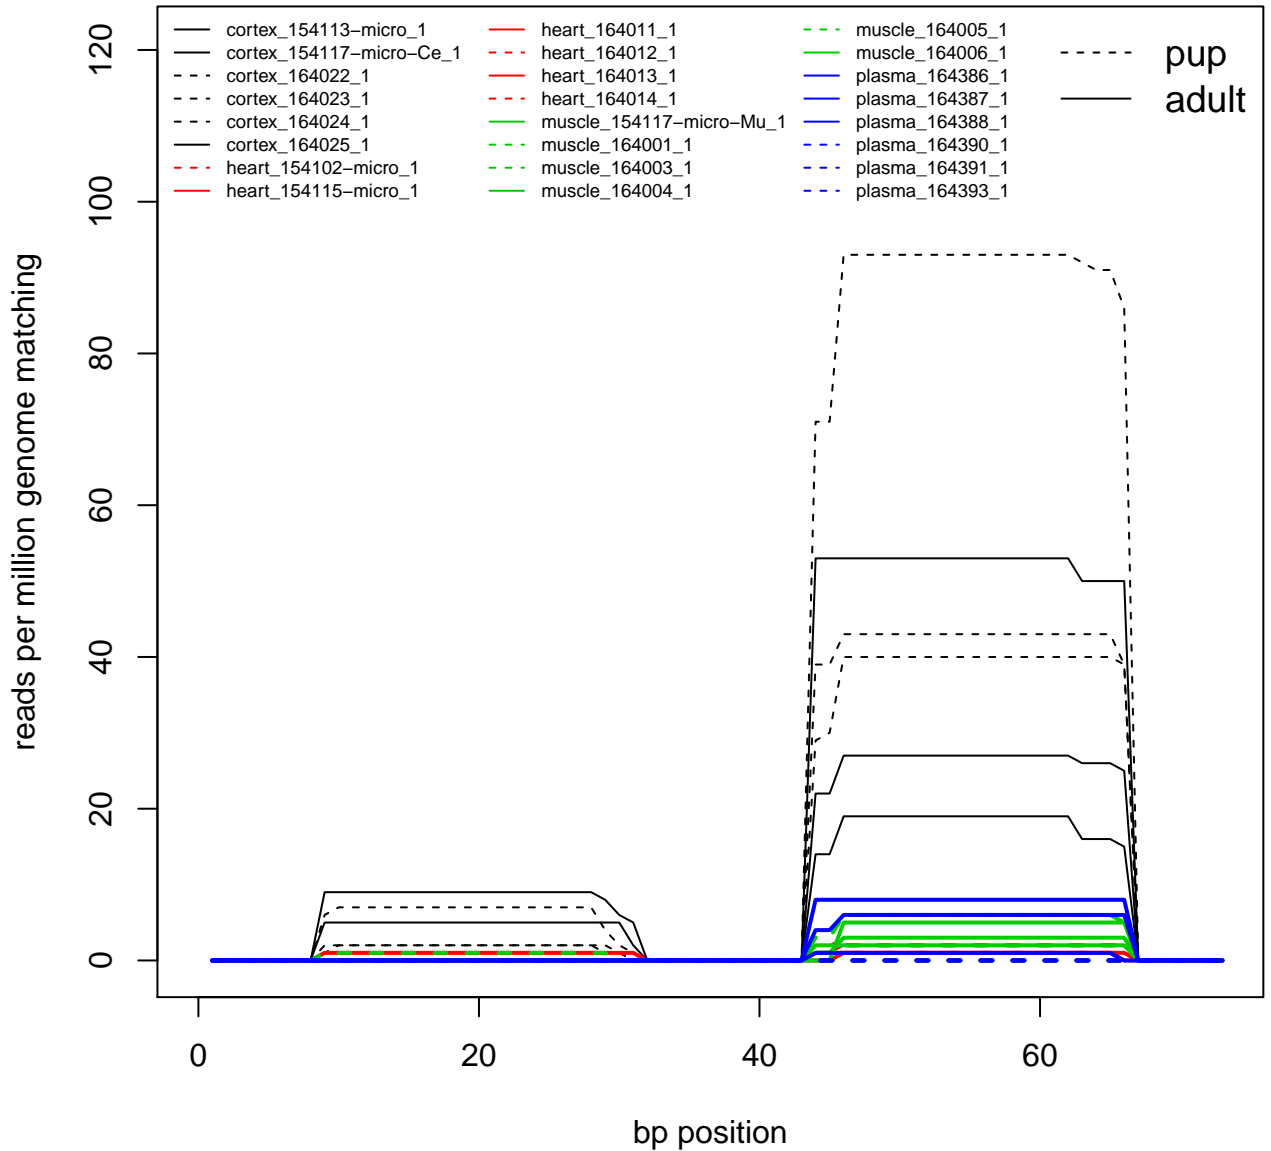

# lwe-miR-514a\_loc1

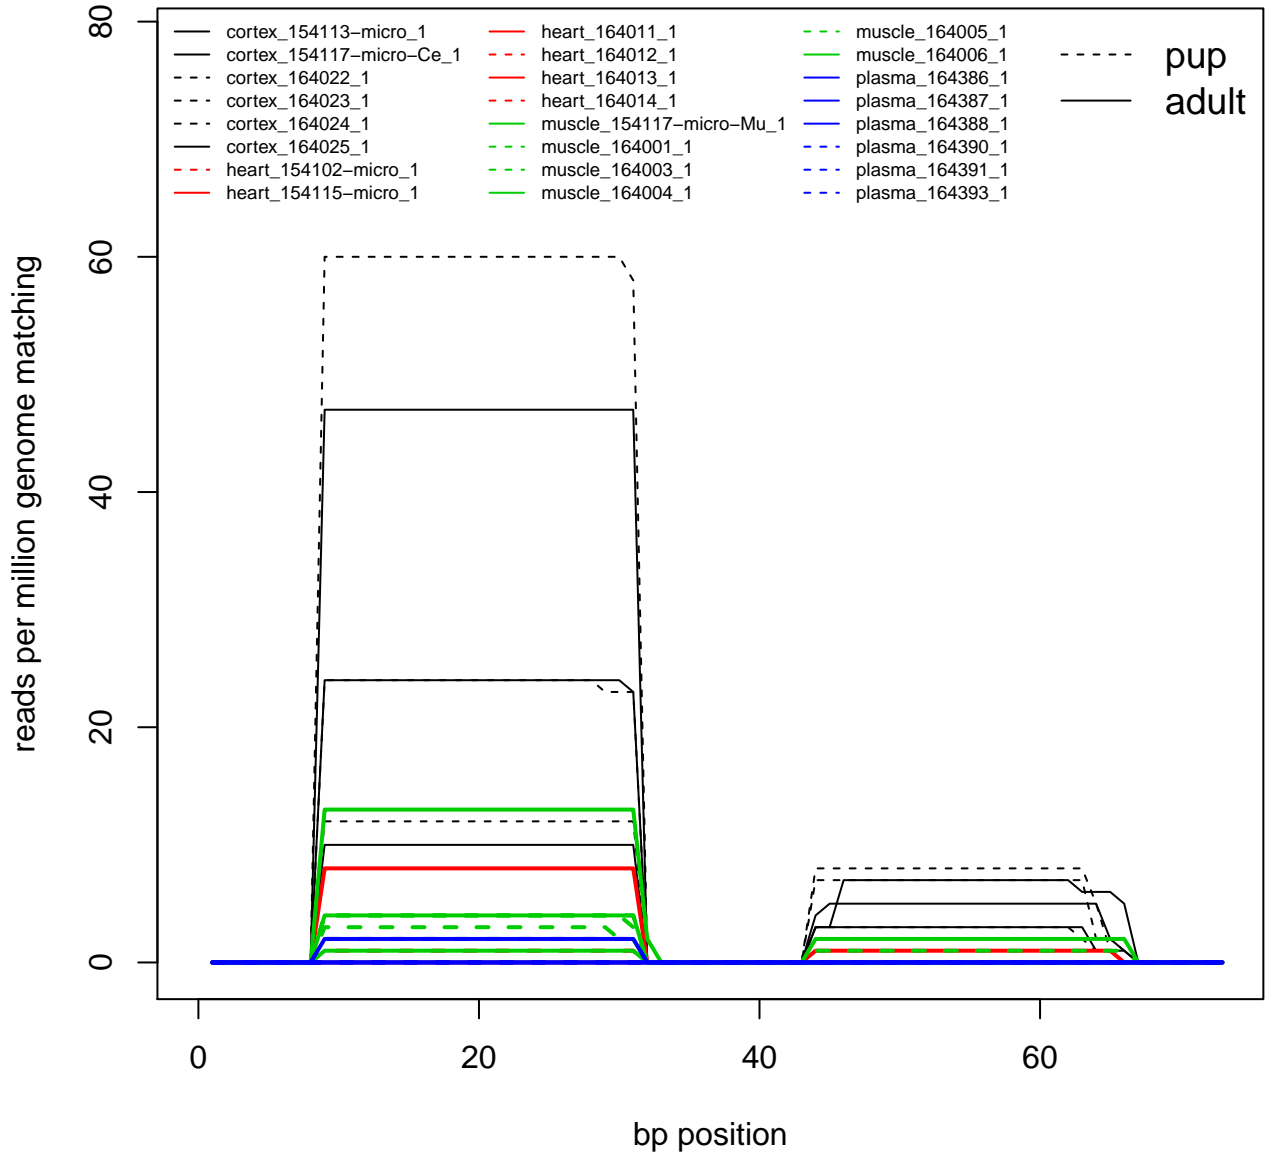

# lwe-miR-509\_loc1

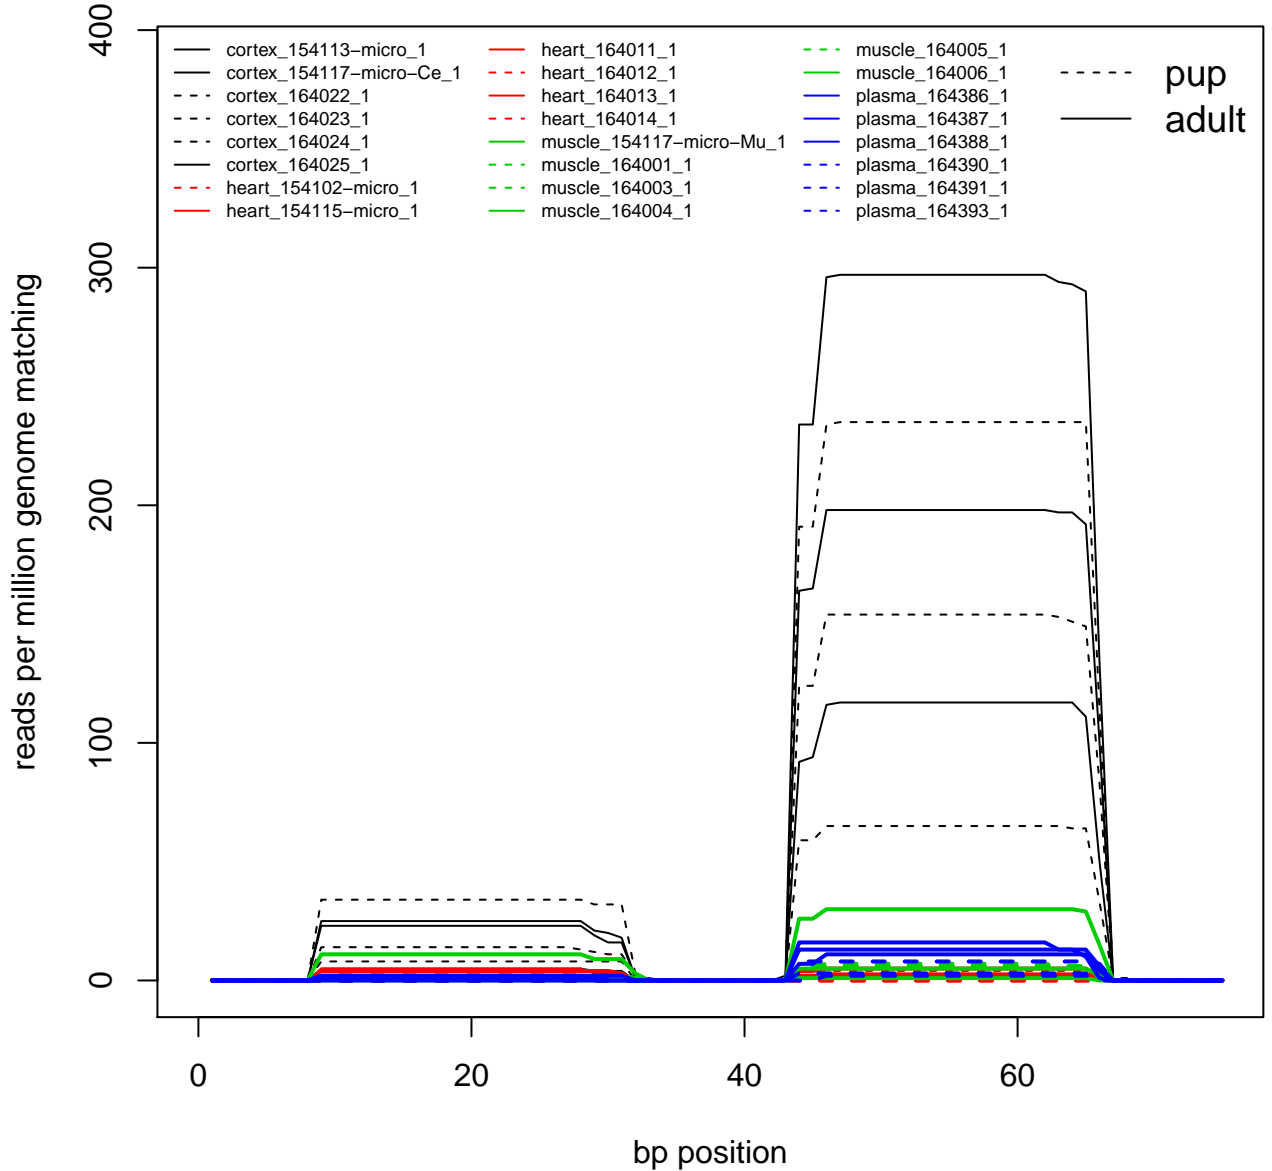

# novel\_55

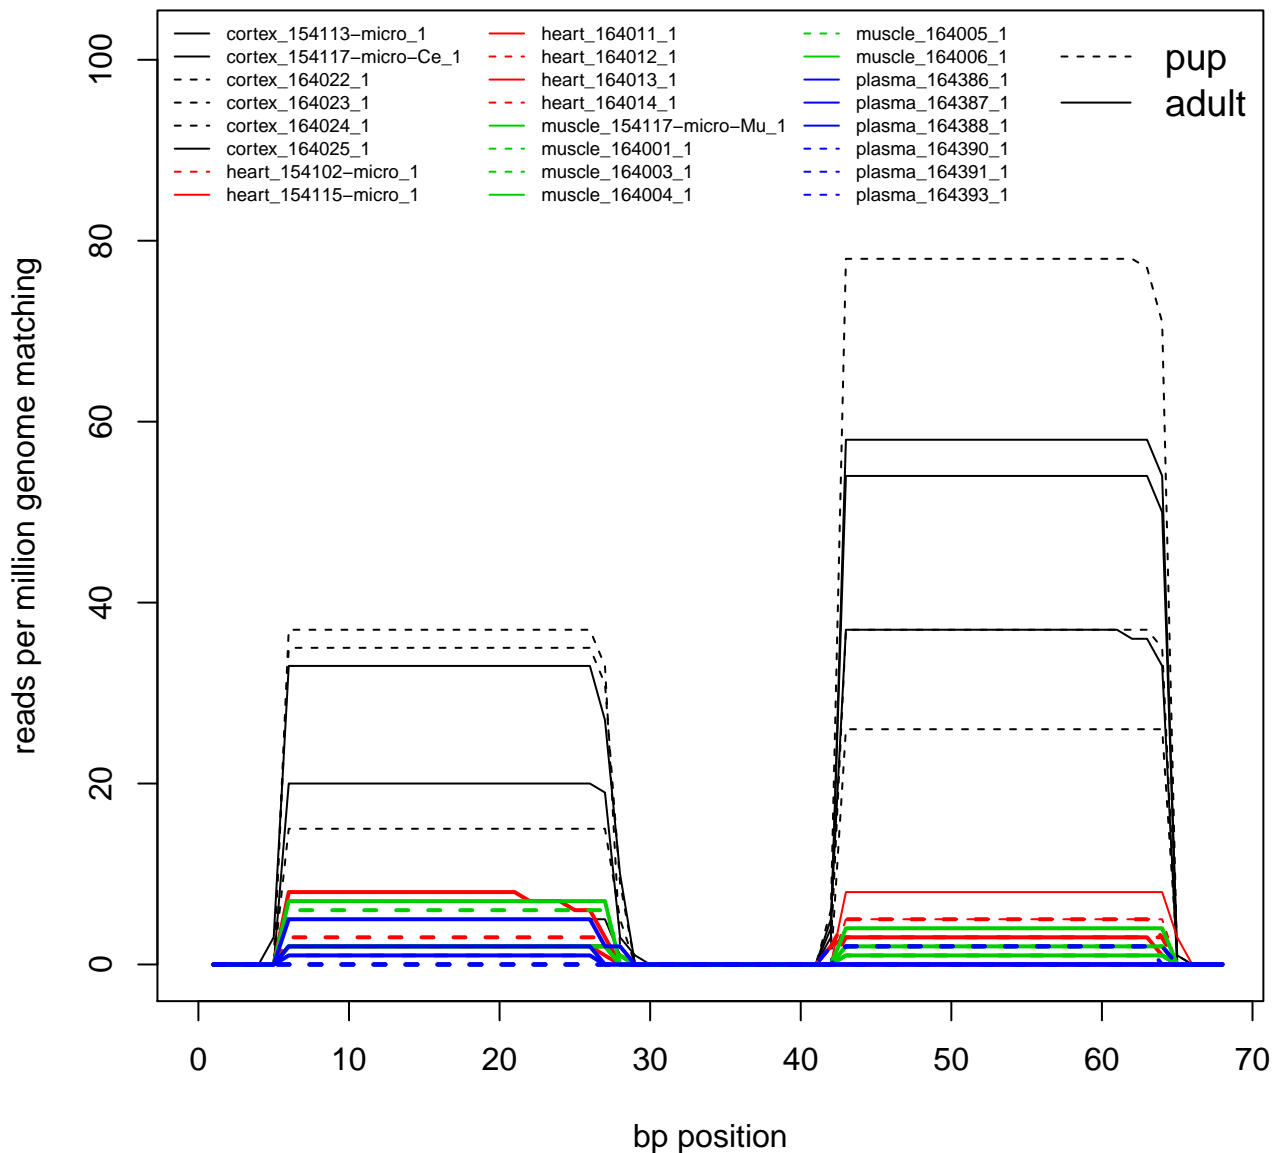



# lwe-miR-124a\_loc1

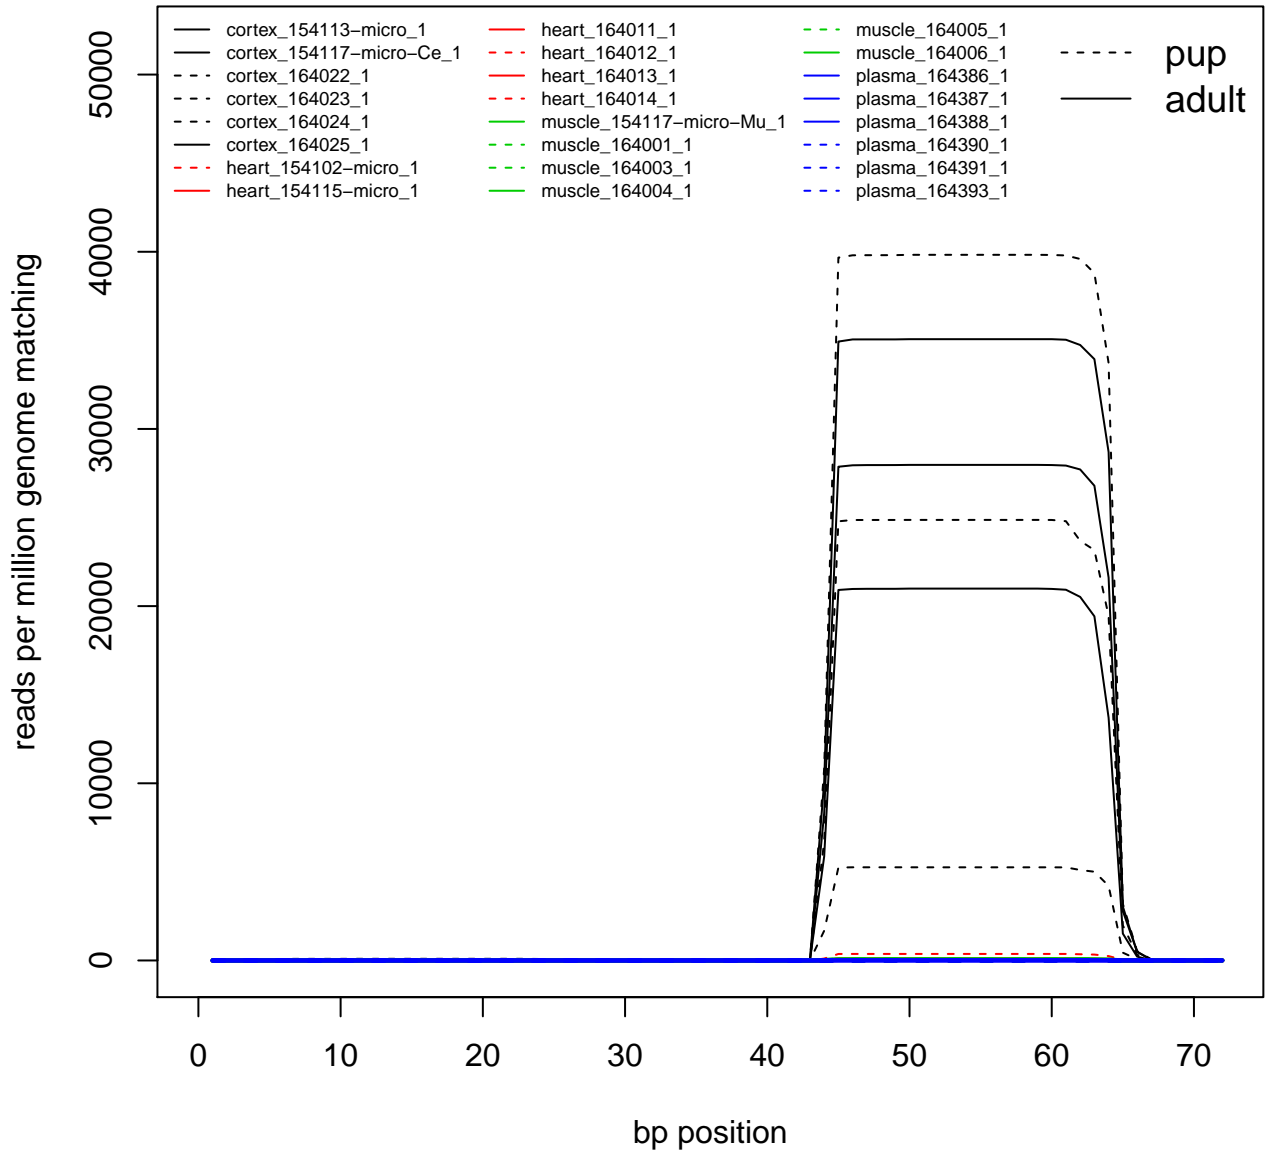



# lwe-miR-199a\_loc1

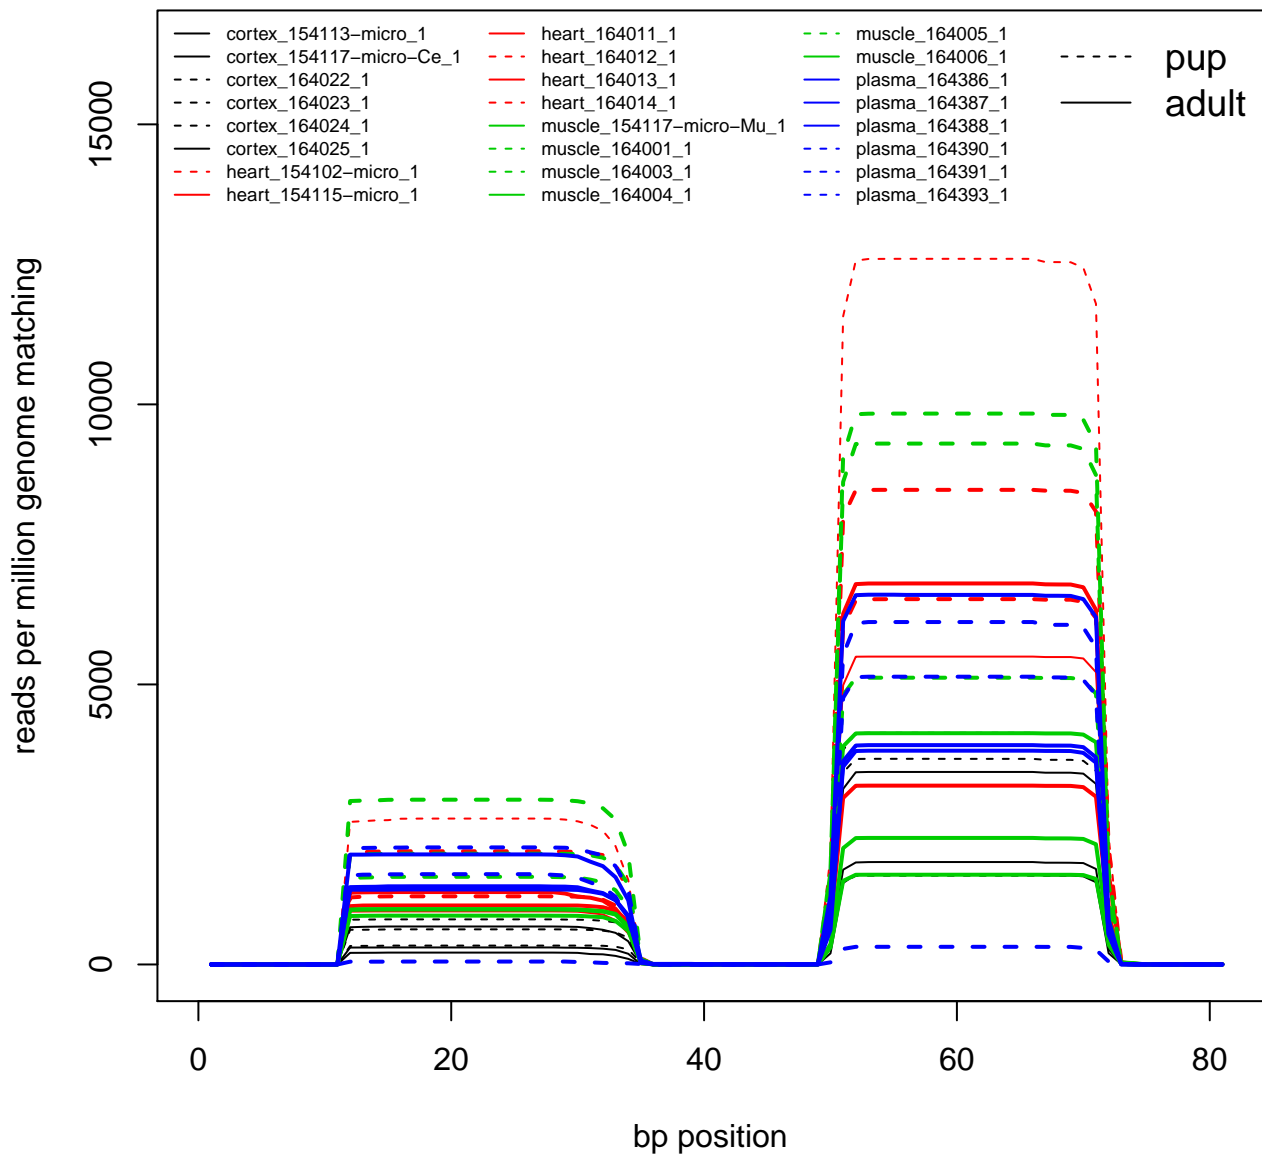



# lwe-miR-125b\_loc1

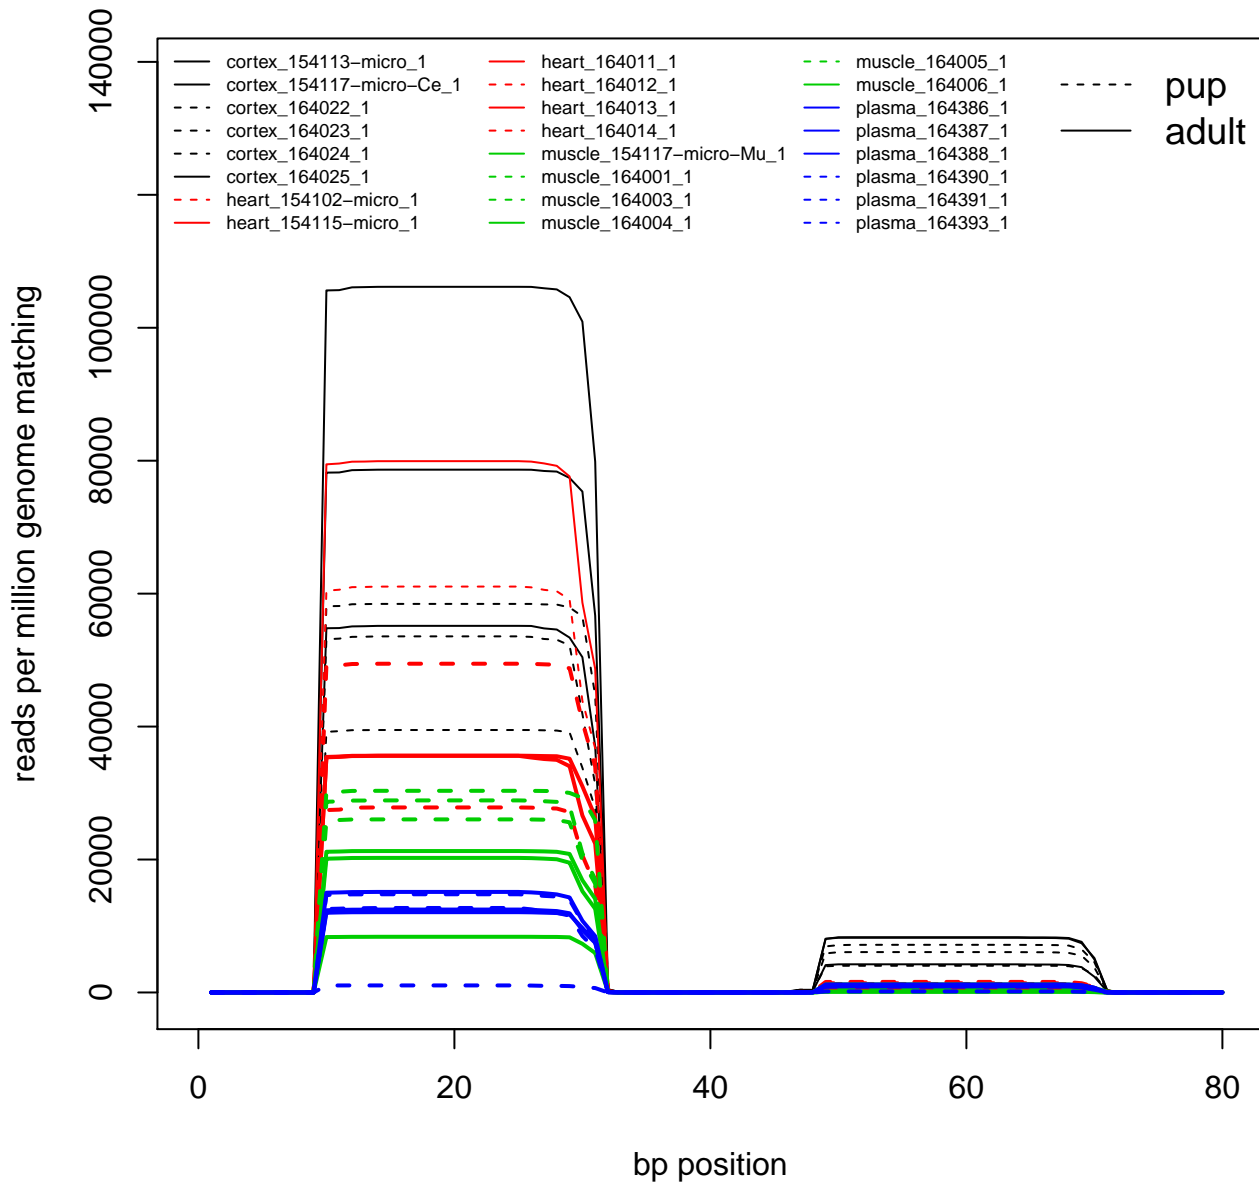



# lwe-miR-99a\_loc1

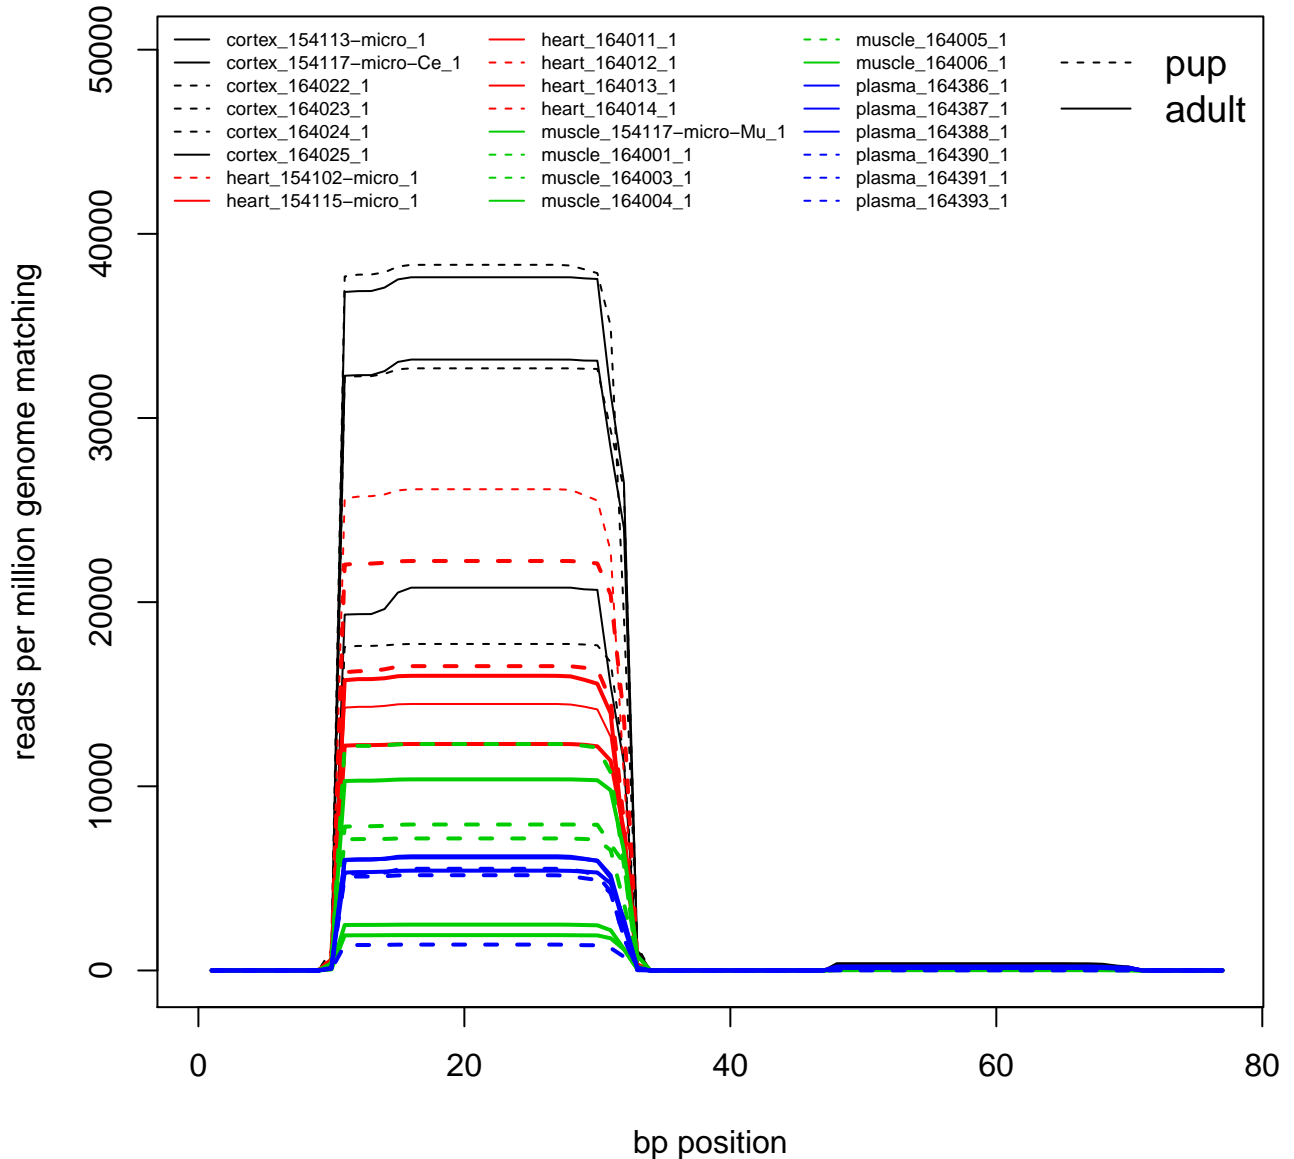

# lwe-miR-128a\_loc2

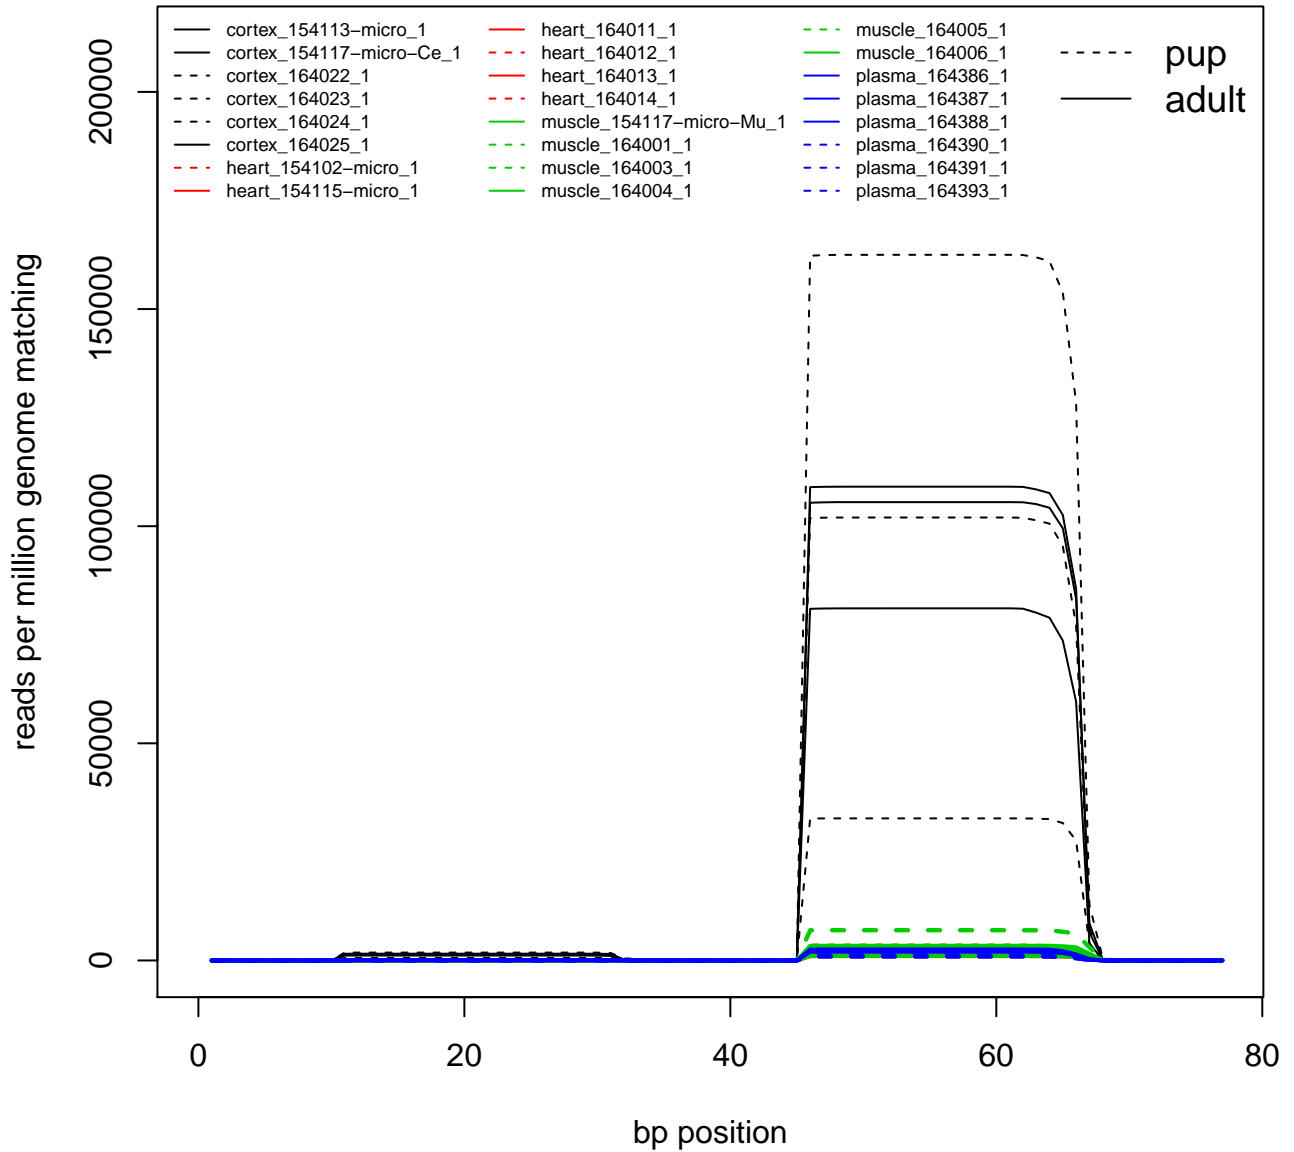

# lwe-miR-200c\_loc1

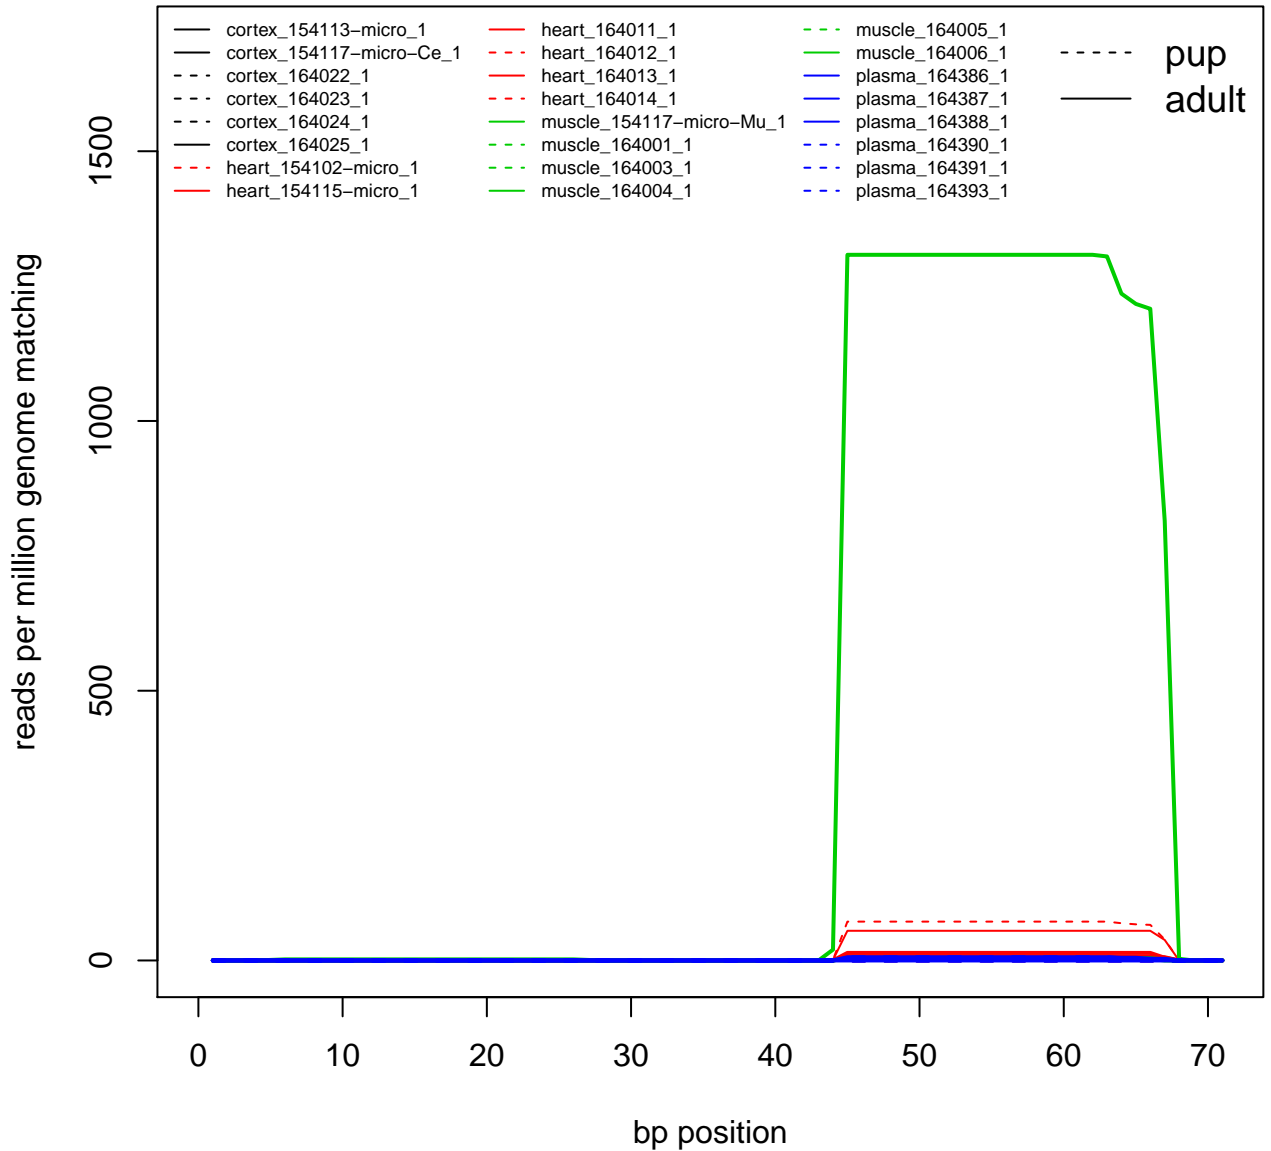

# lwe-miR-141\_loc1

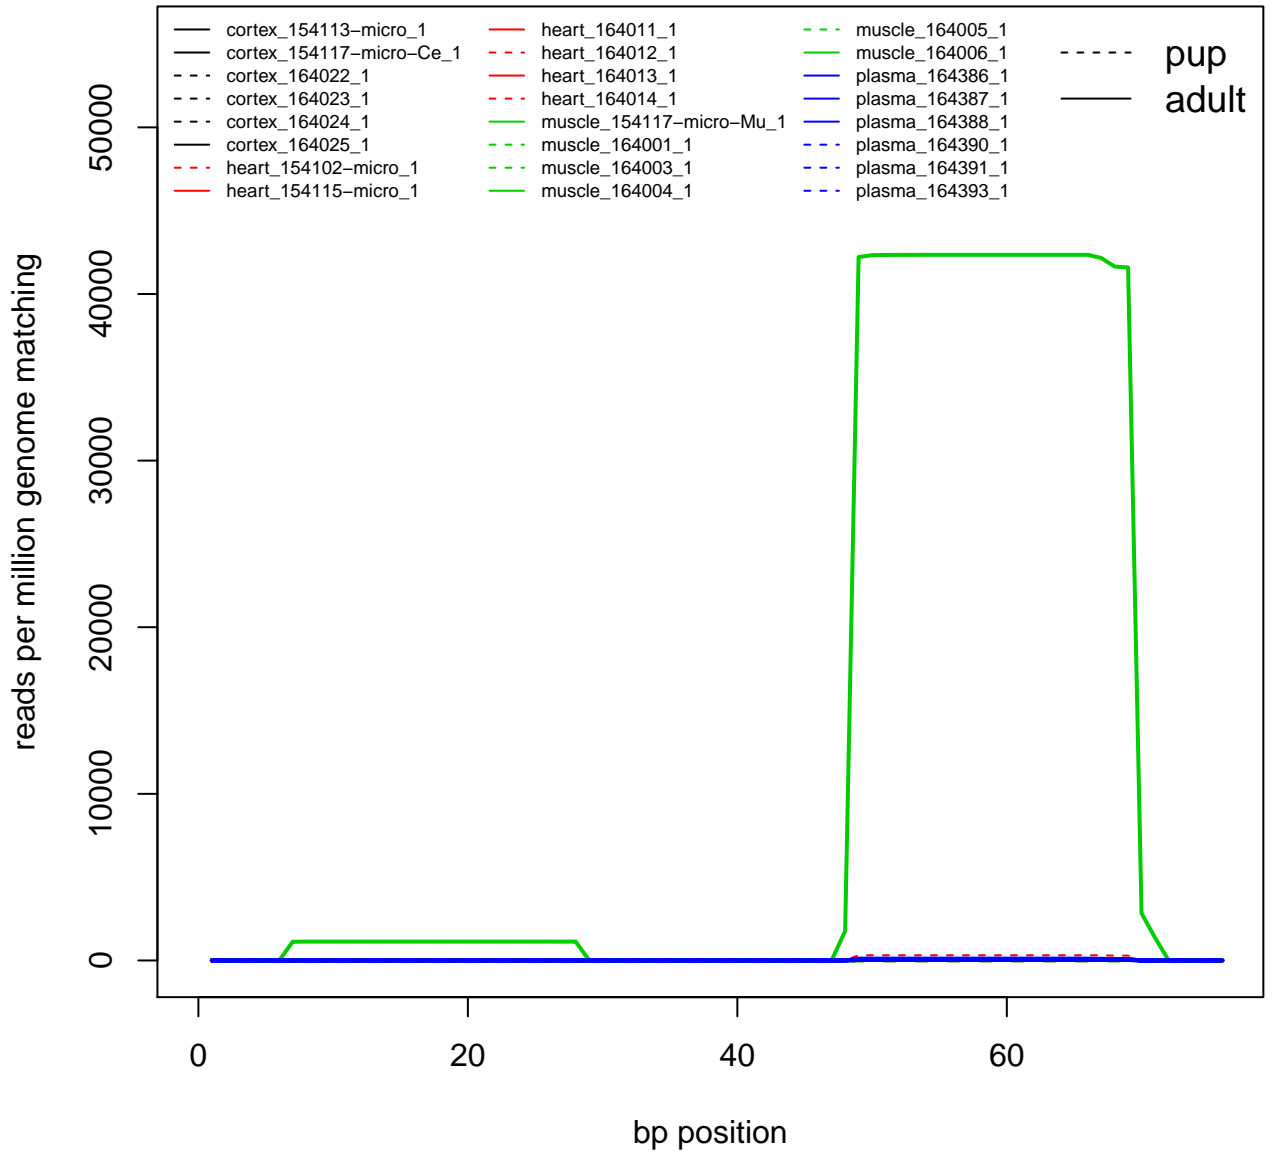



# lwe-miR-124a\_loc2

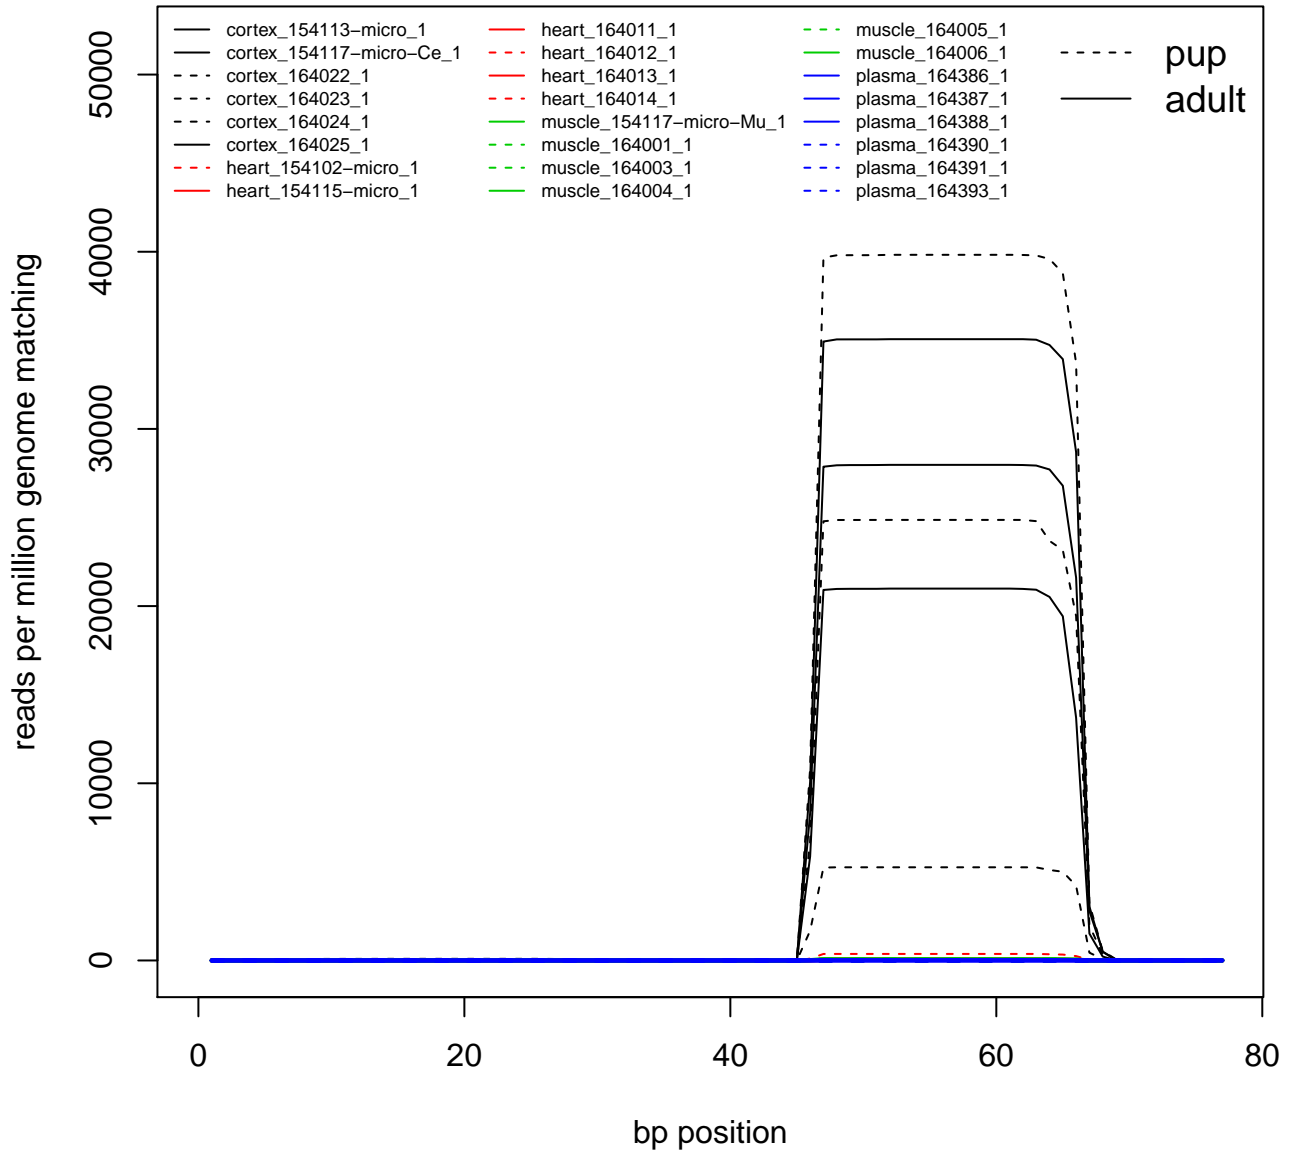

# novel\_57

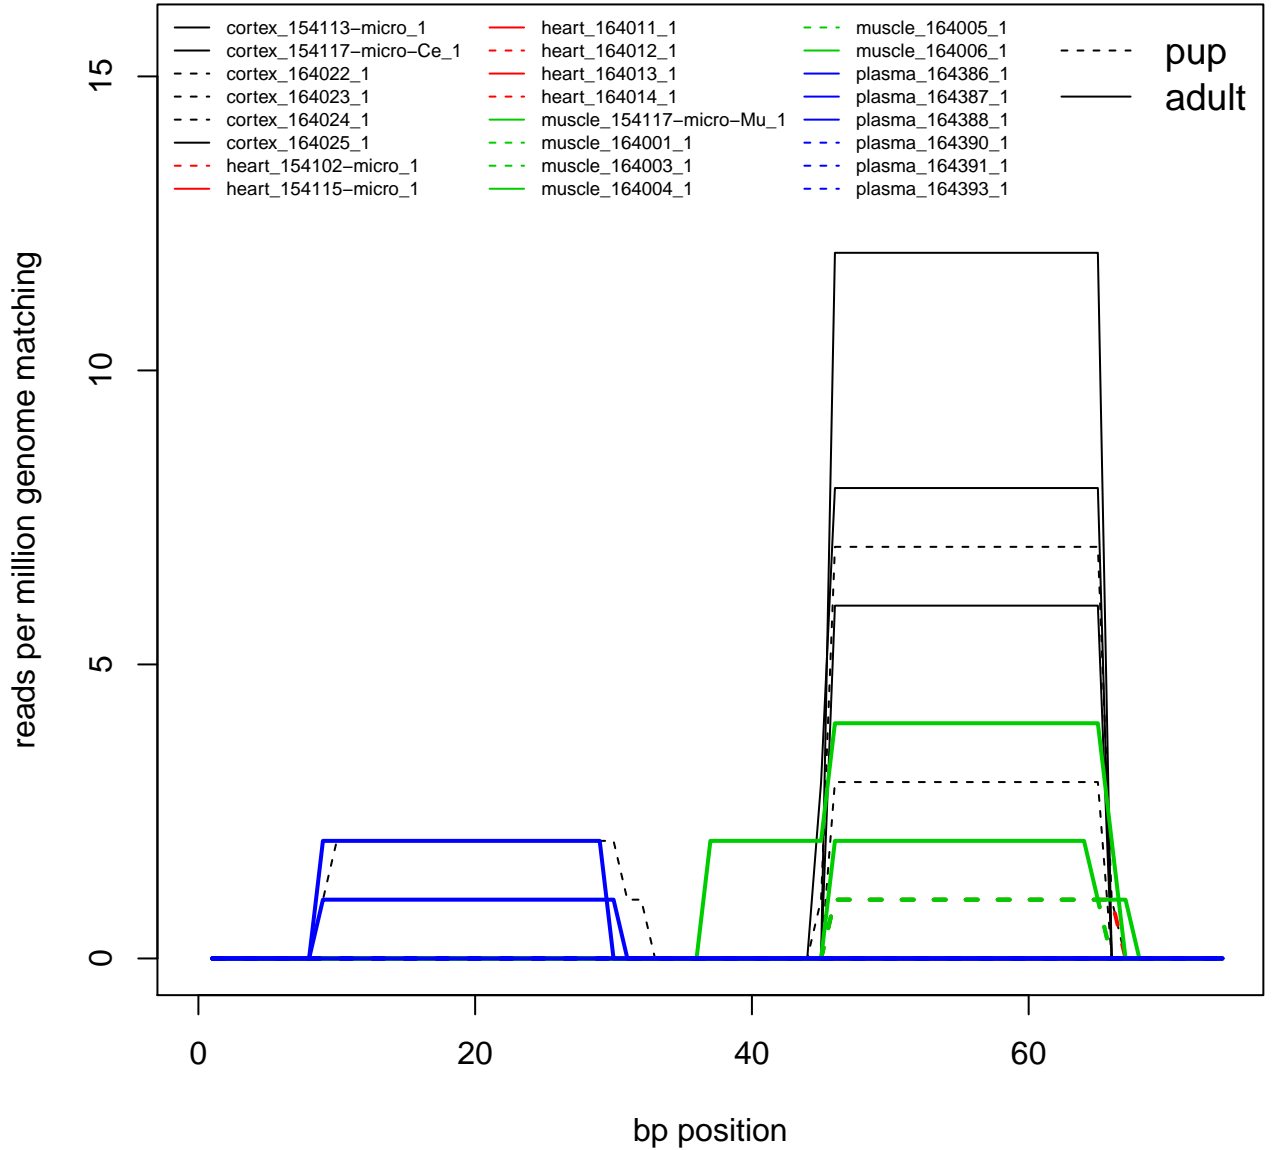

# lwe-miR-219\_loc2

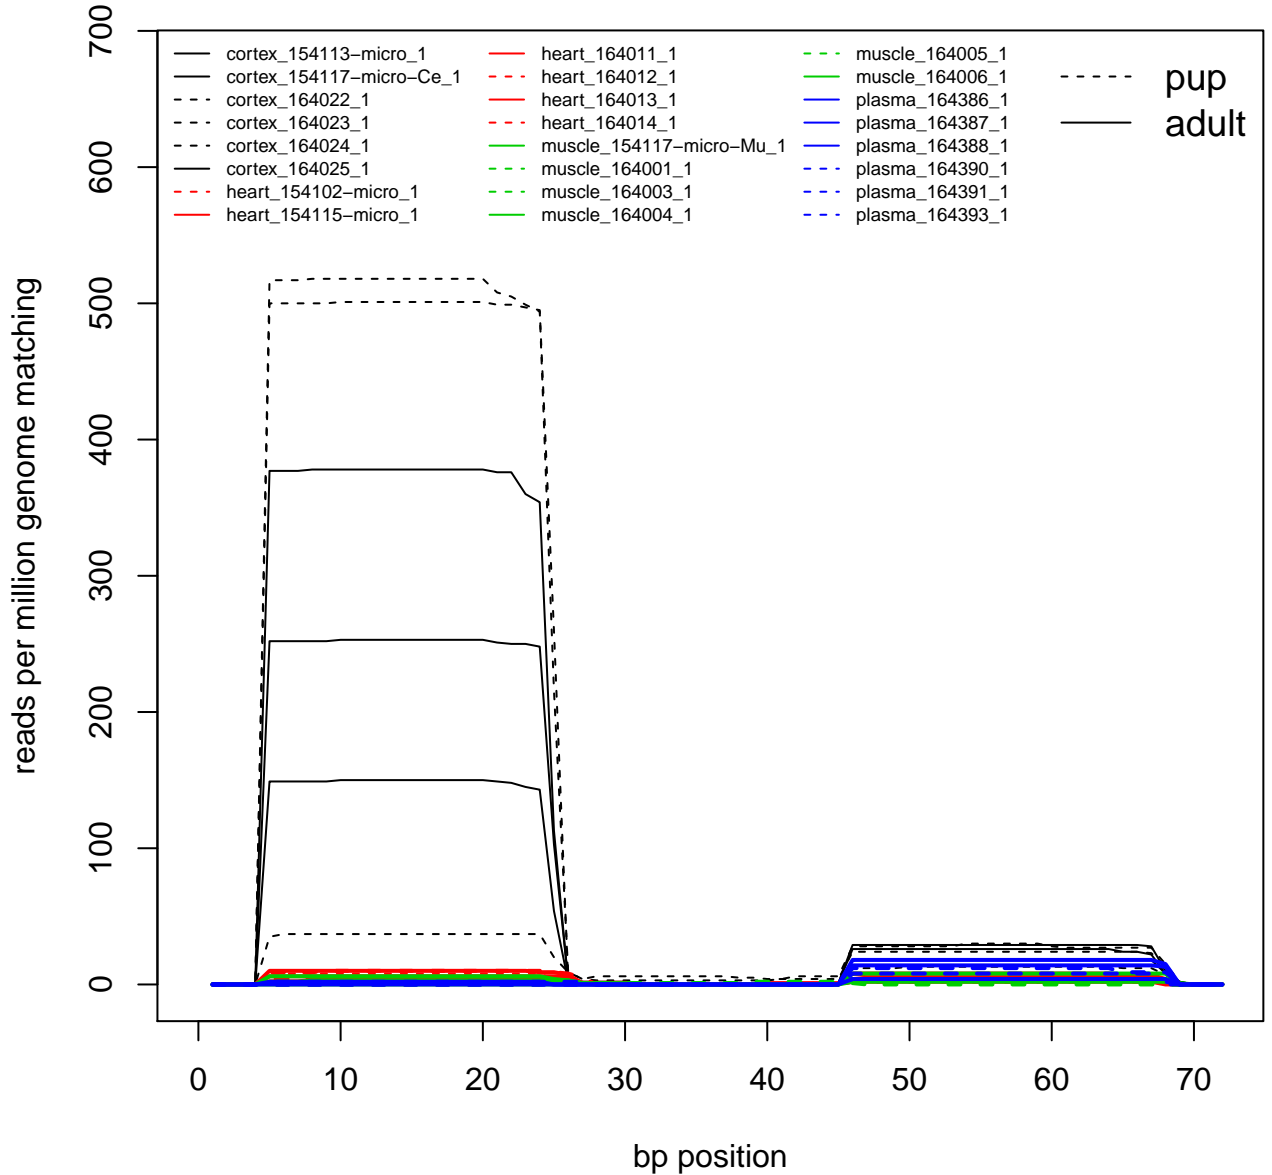

# novel\_58

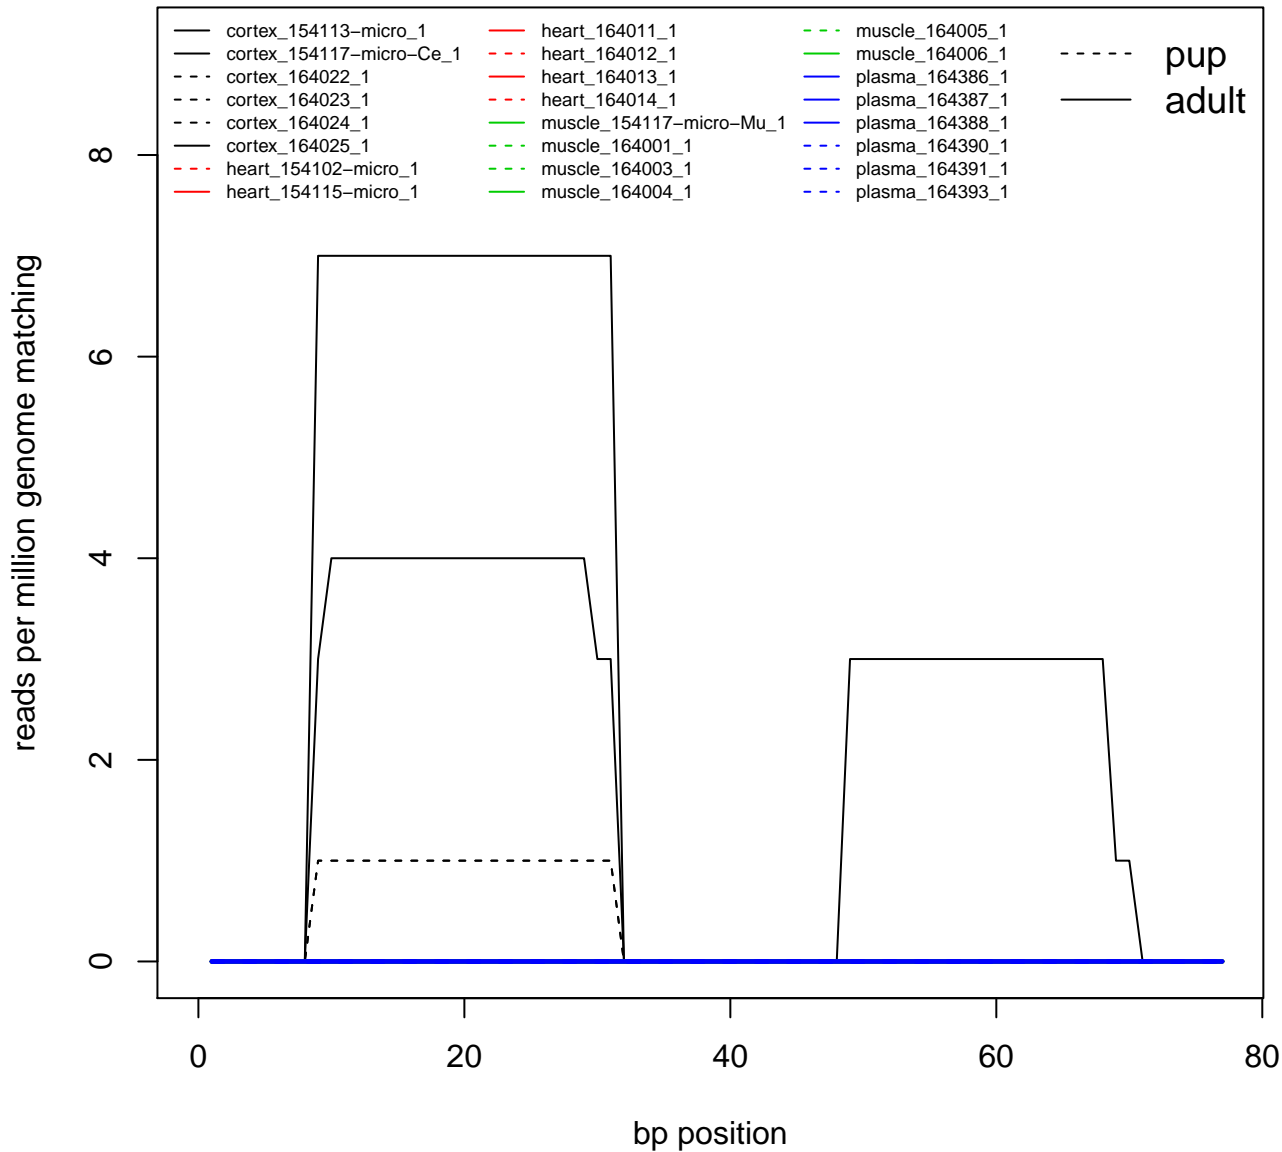

# novel\_59

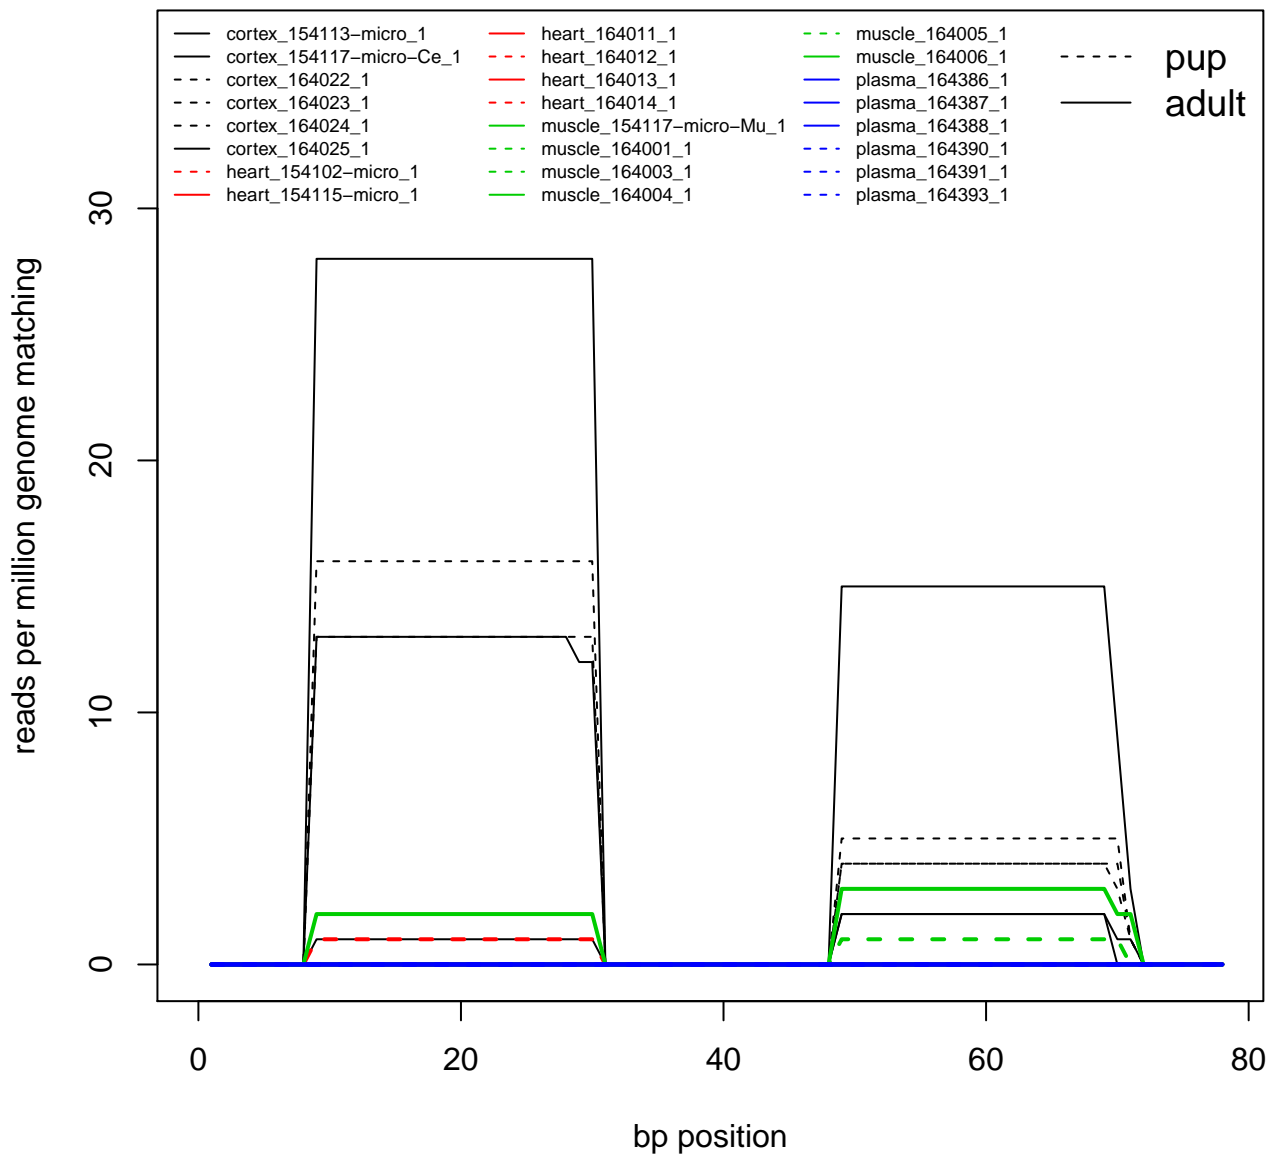

# lwe-miR-23b\_loc1

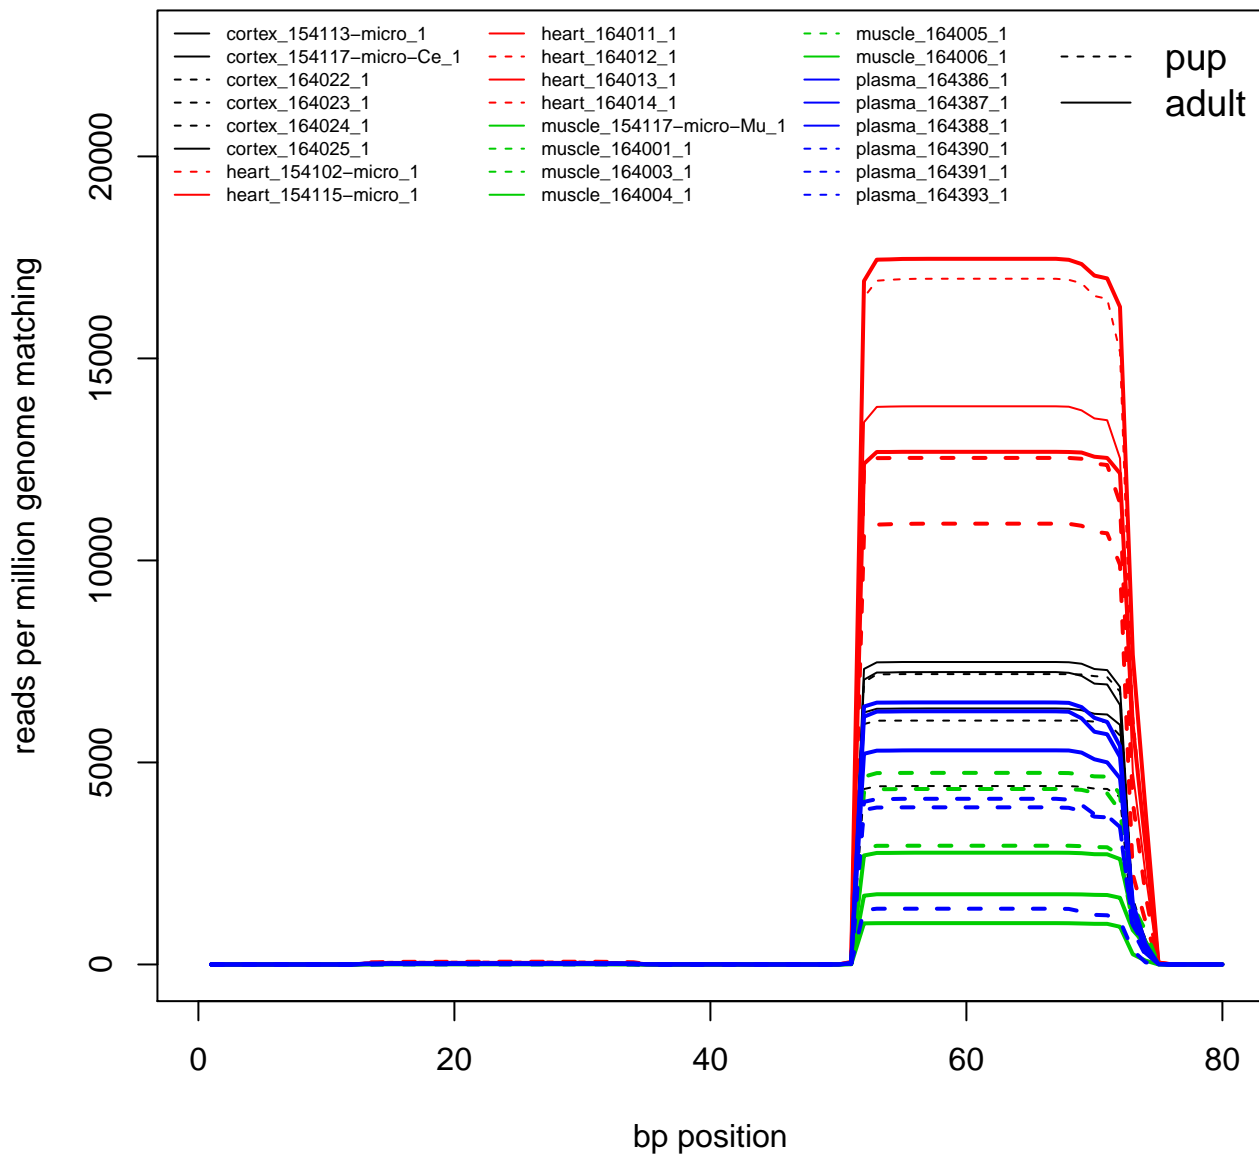

# lwe-miR-27\_loc1

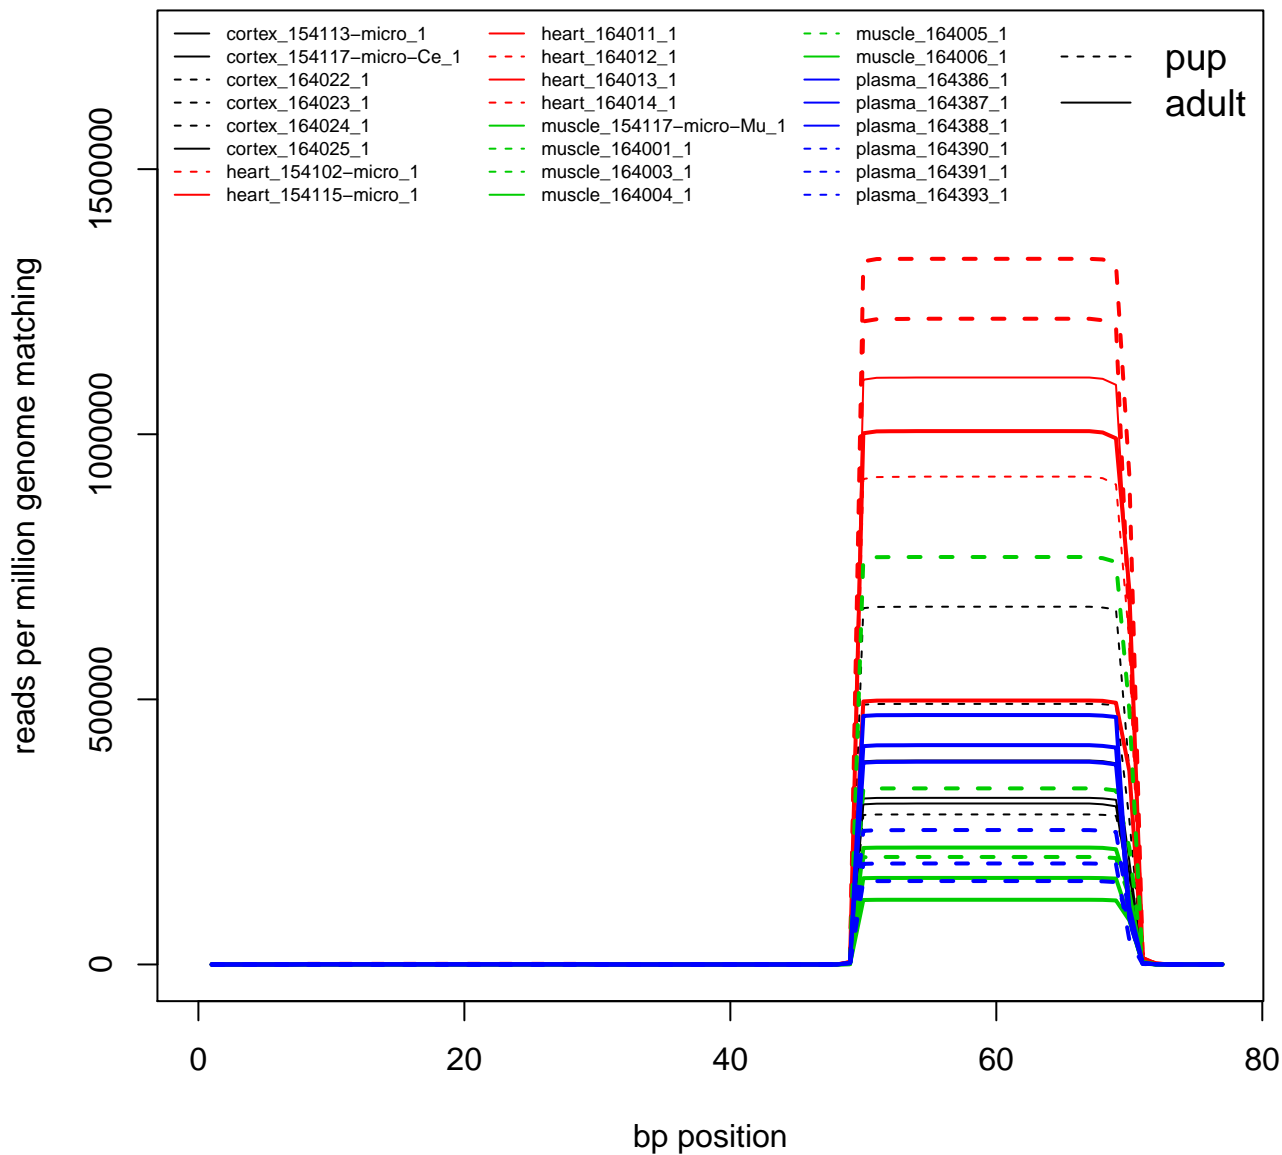

# lwe-miR-24a\_loc2

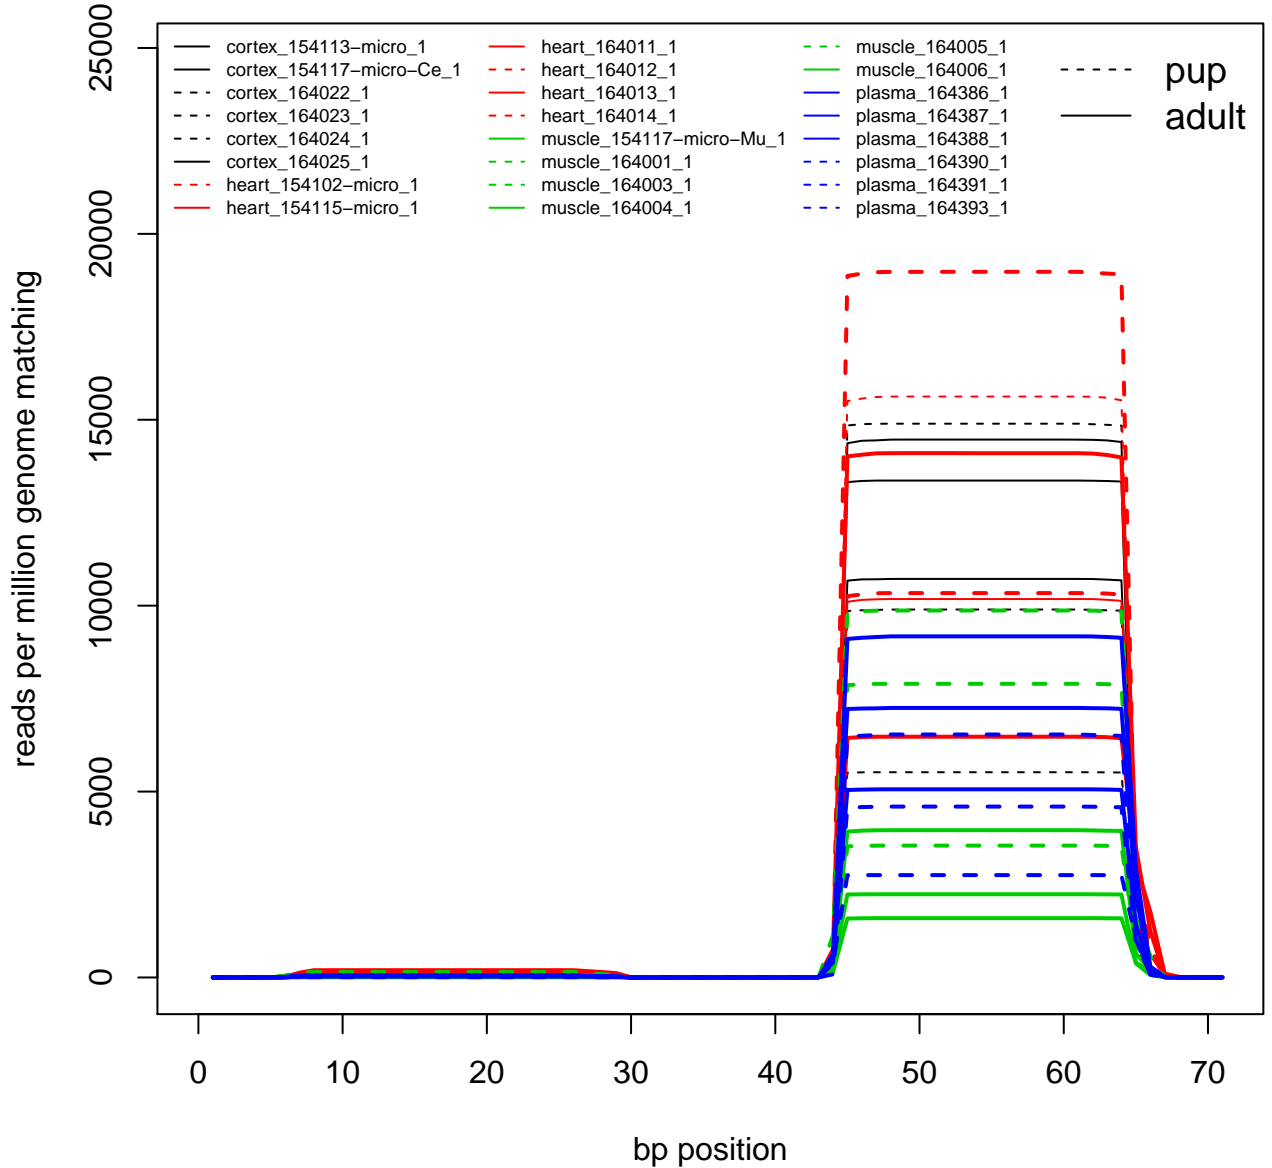



# lwe-miR-330\_loc1

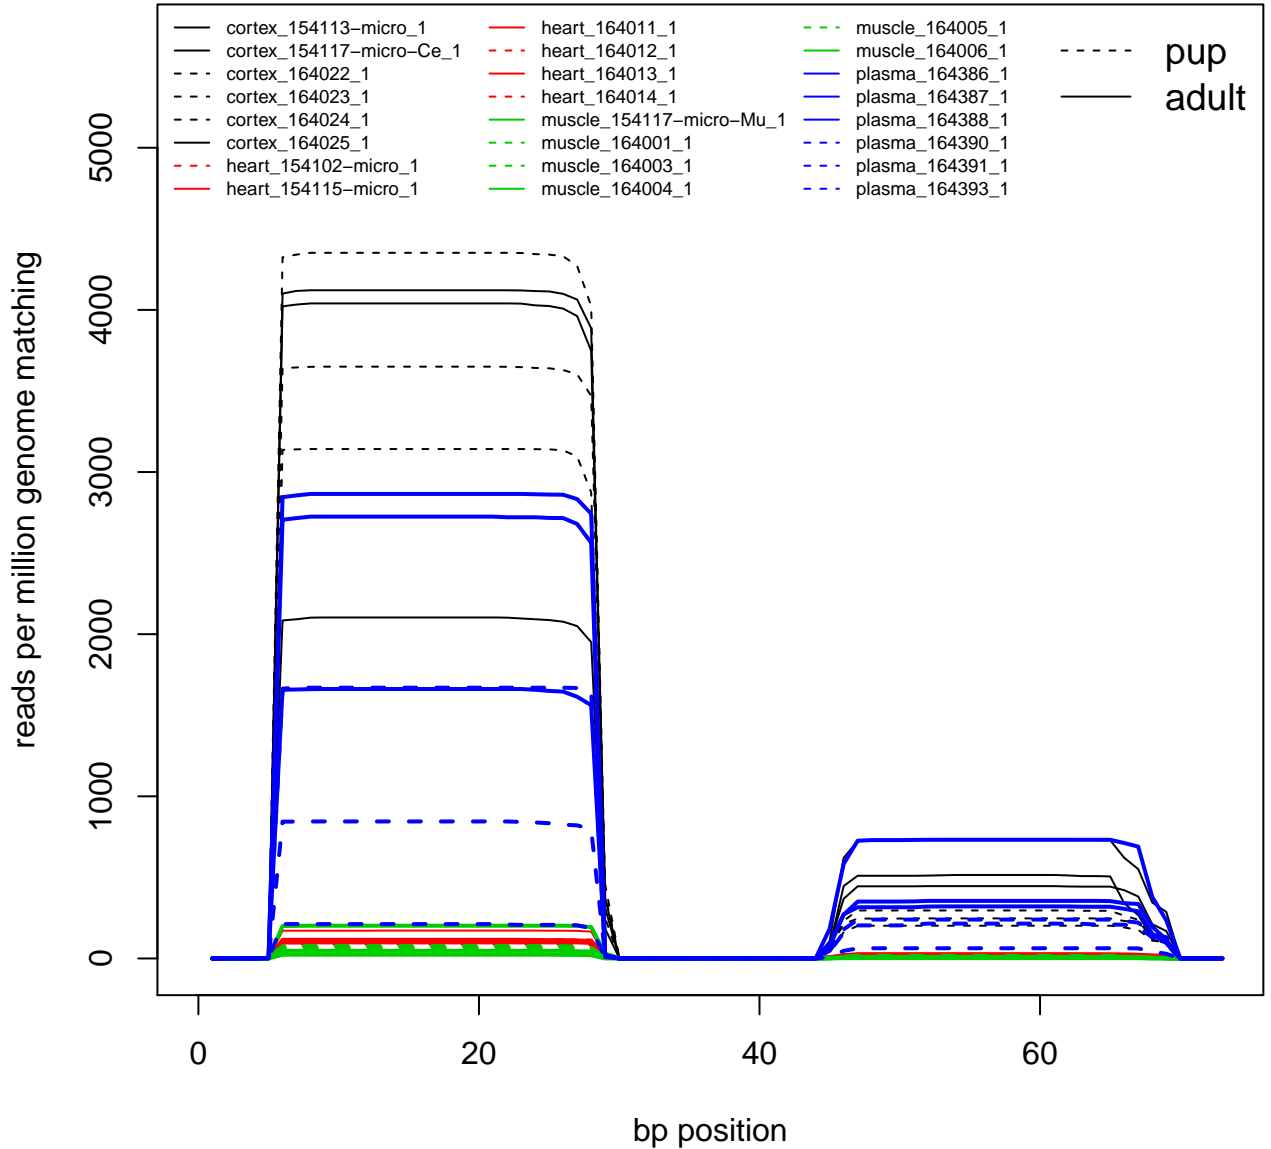

# novel\_60

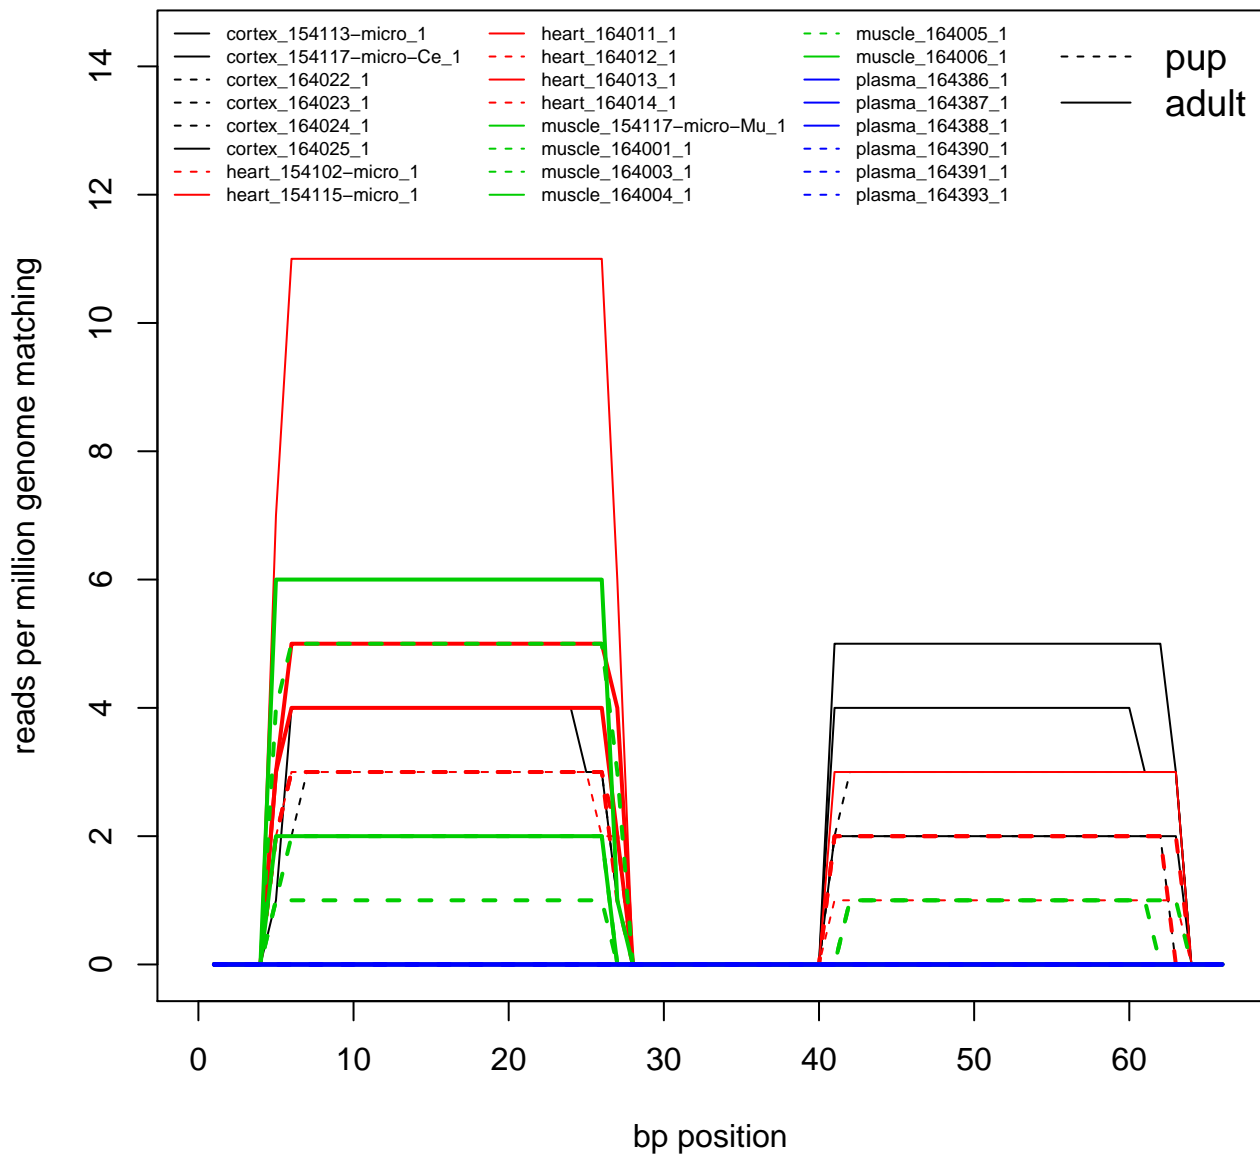

# lwe-miR-100a\_loc1

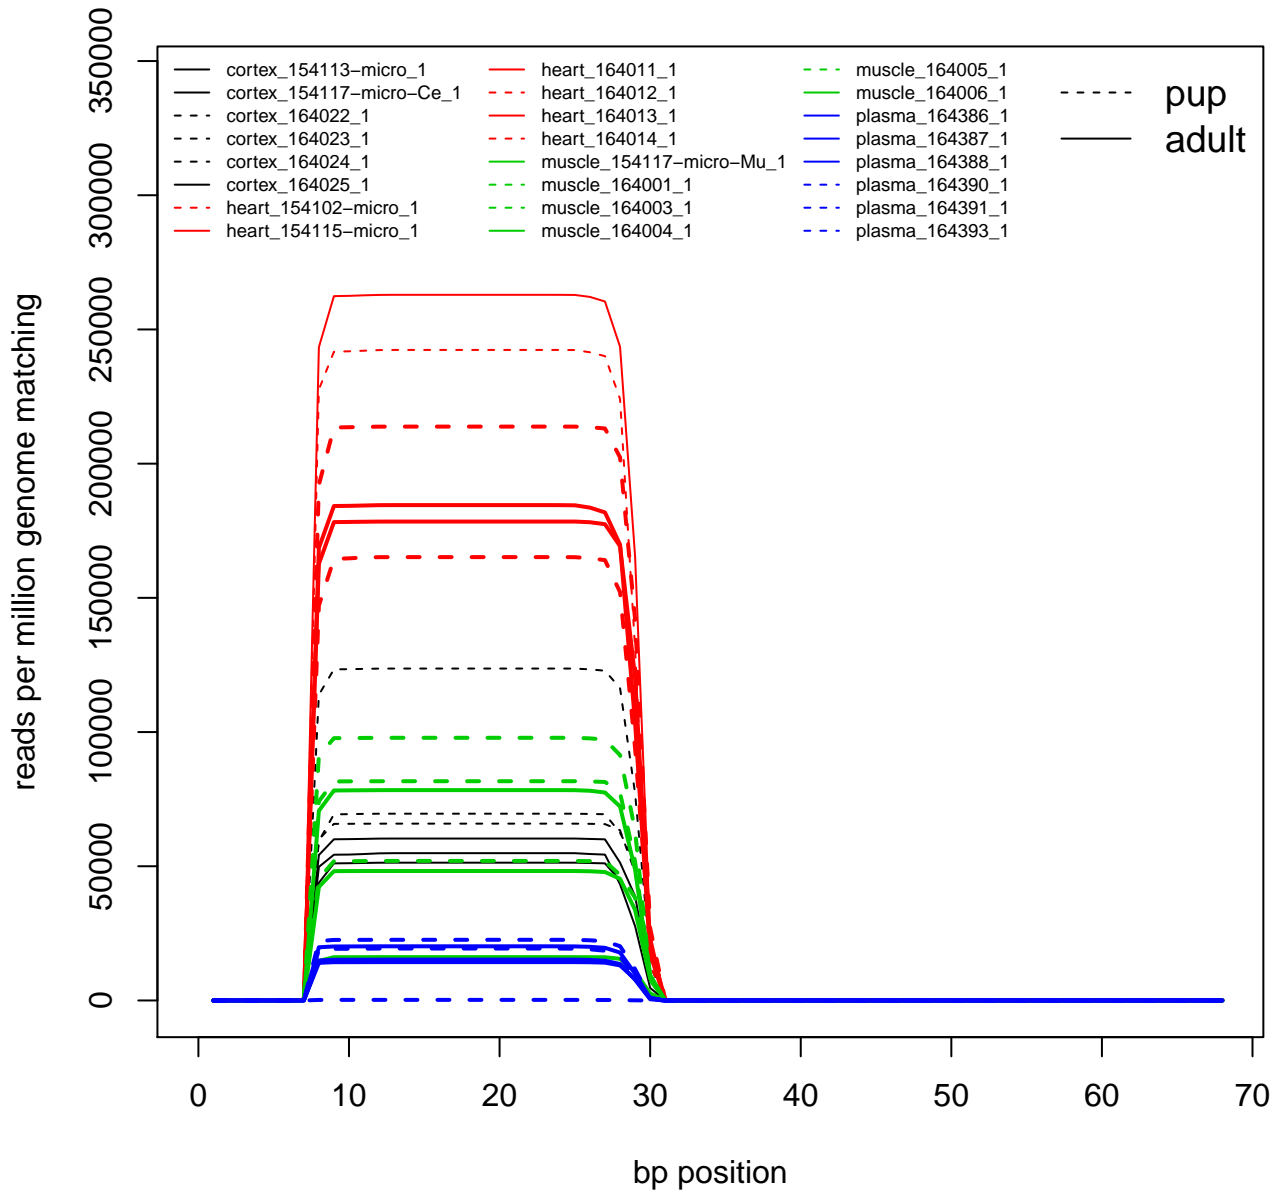

# let-7a\_loc3

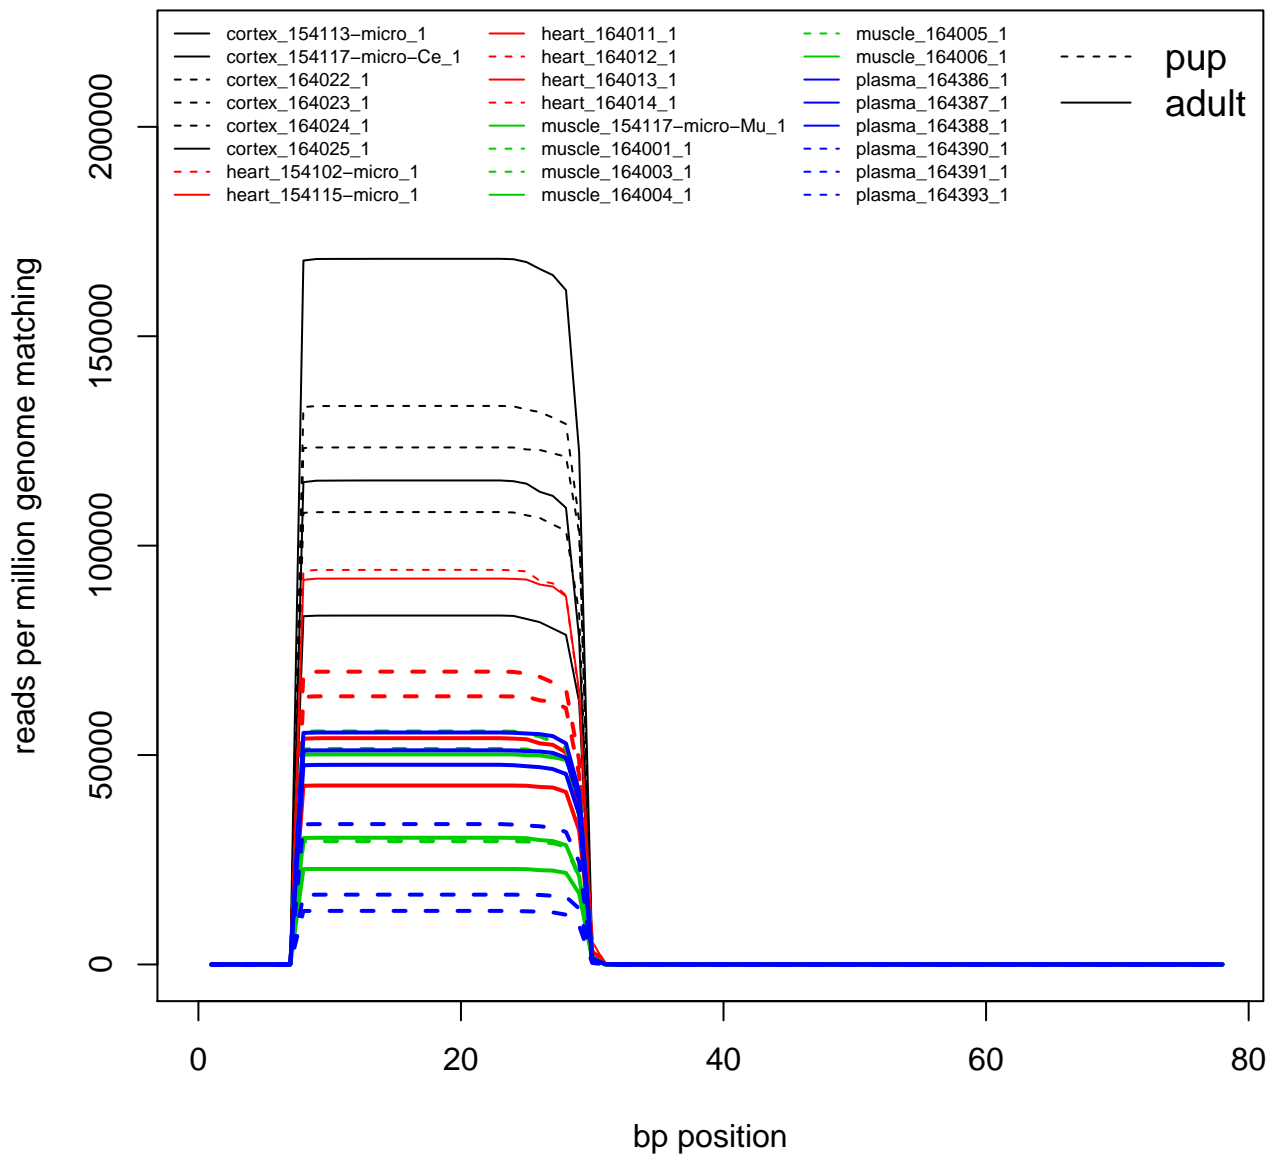

# lwe-miR-125a\_loc1

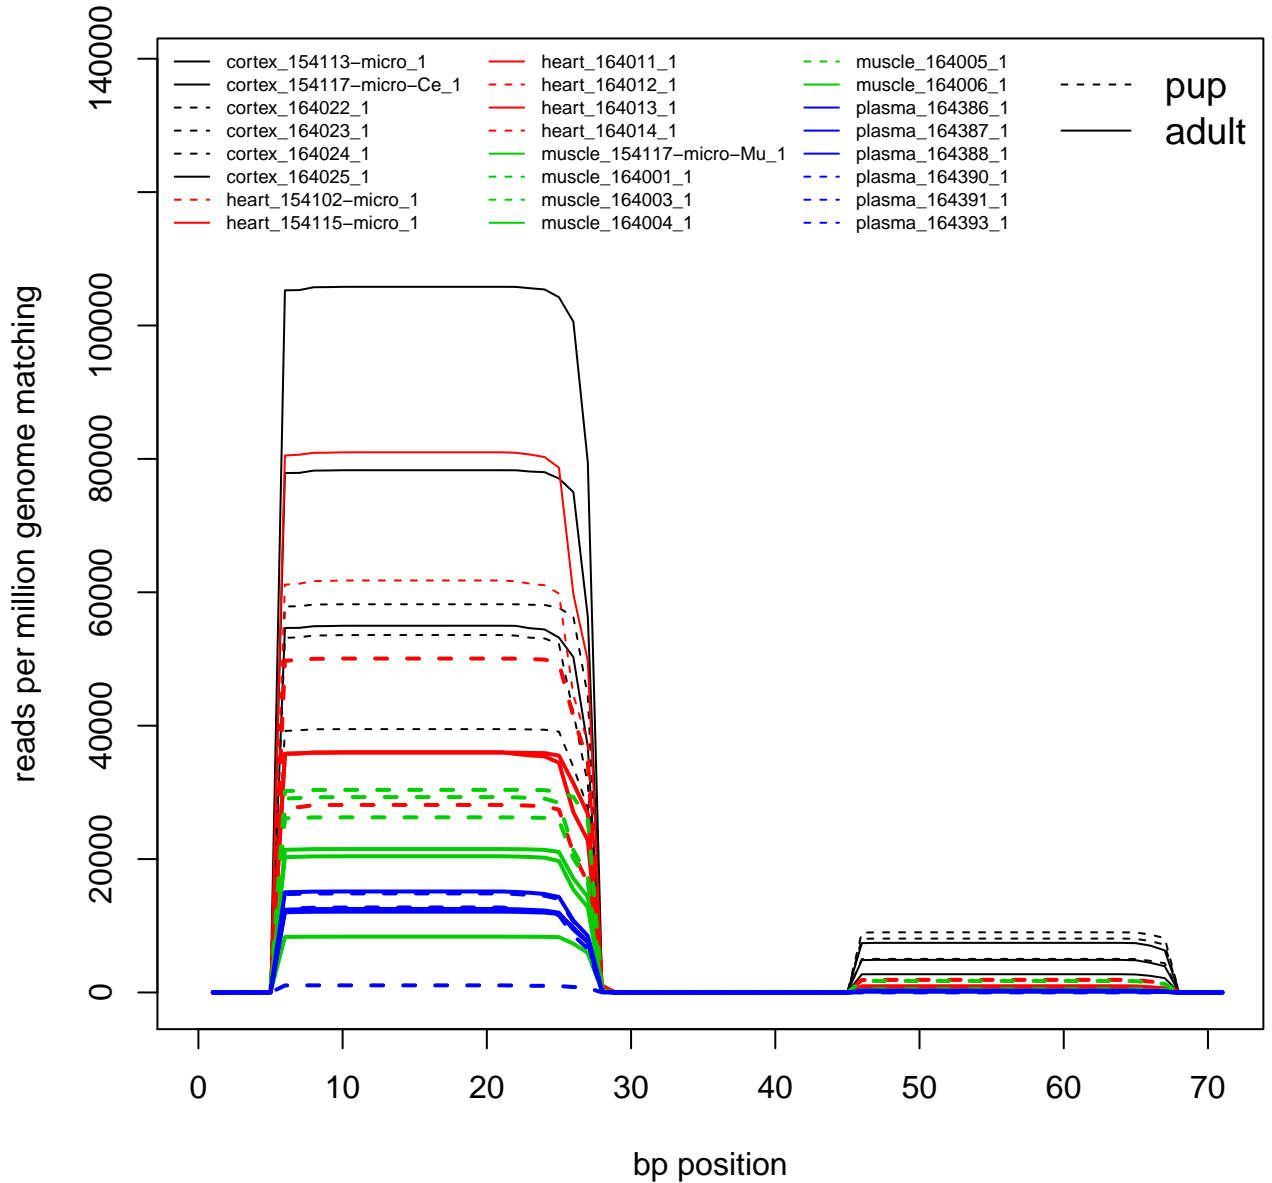









# novel\_63

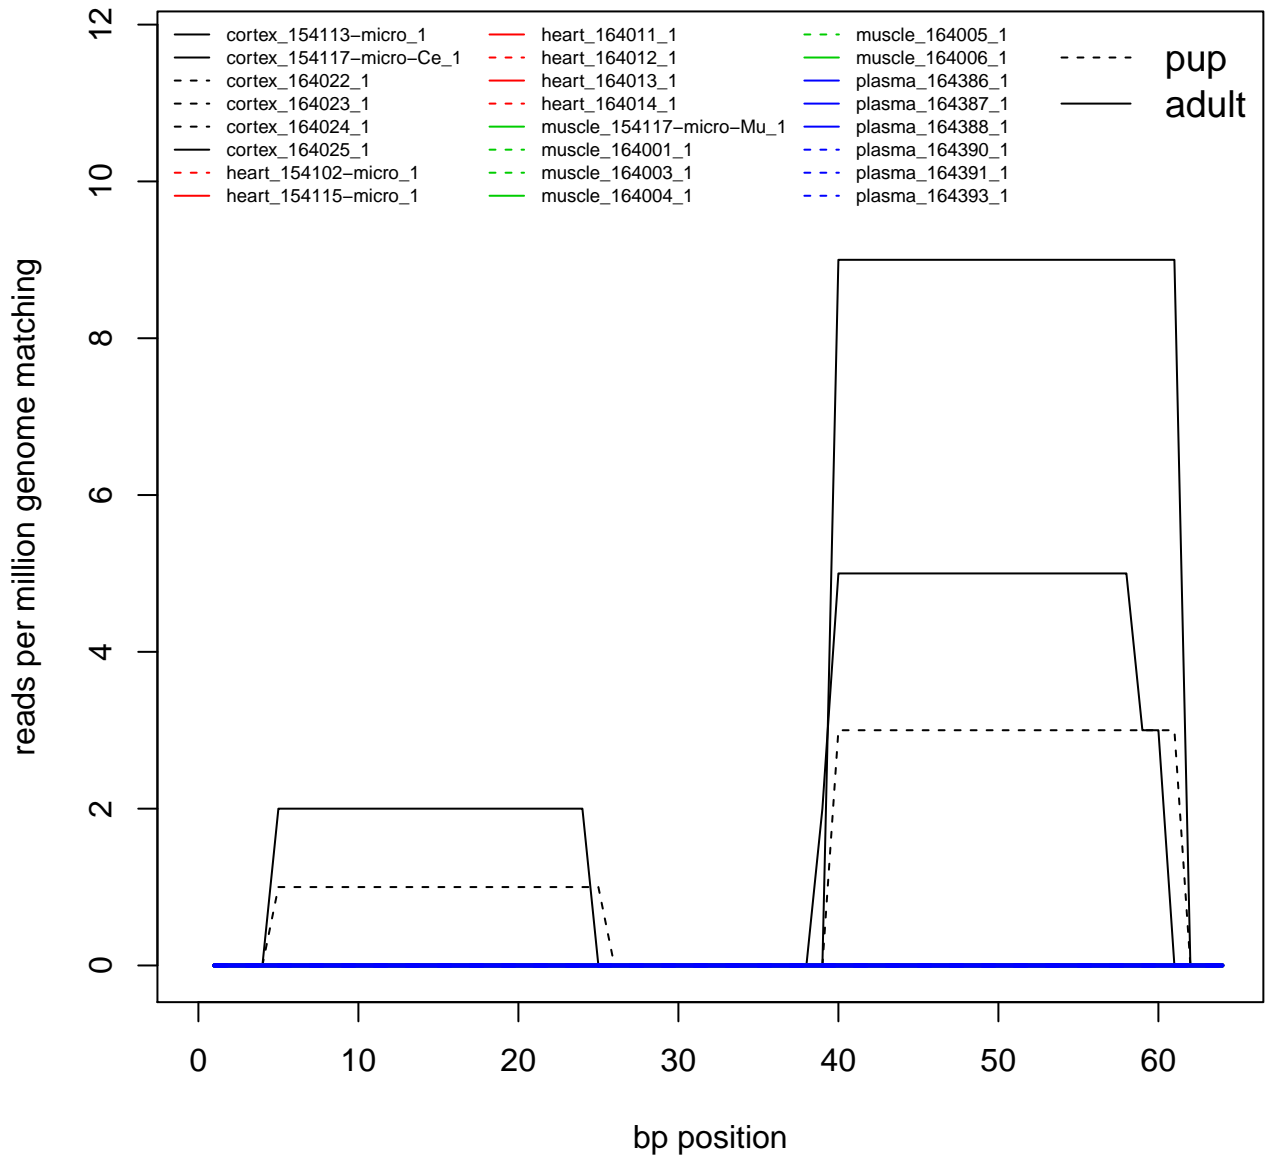

# lwe-miR-365a\_loc2

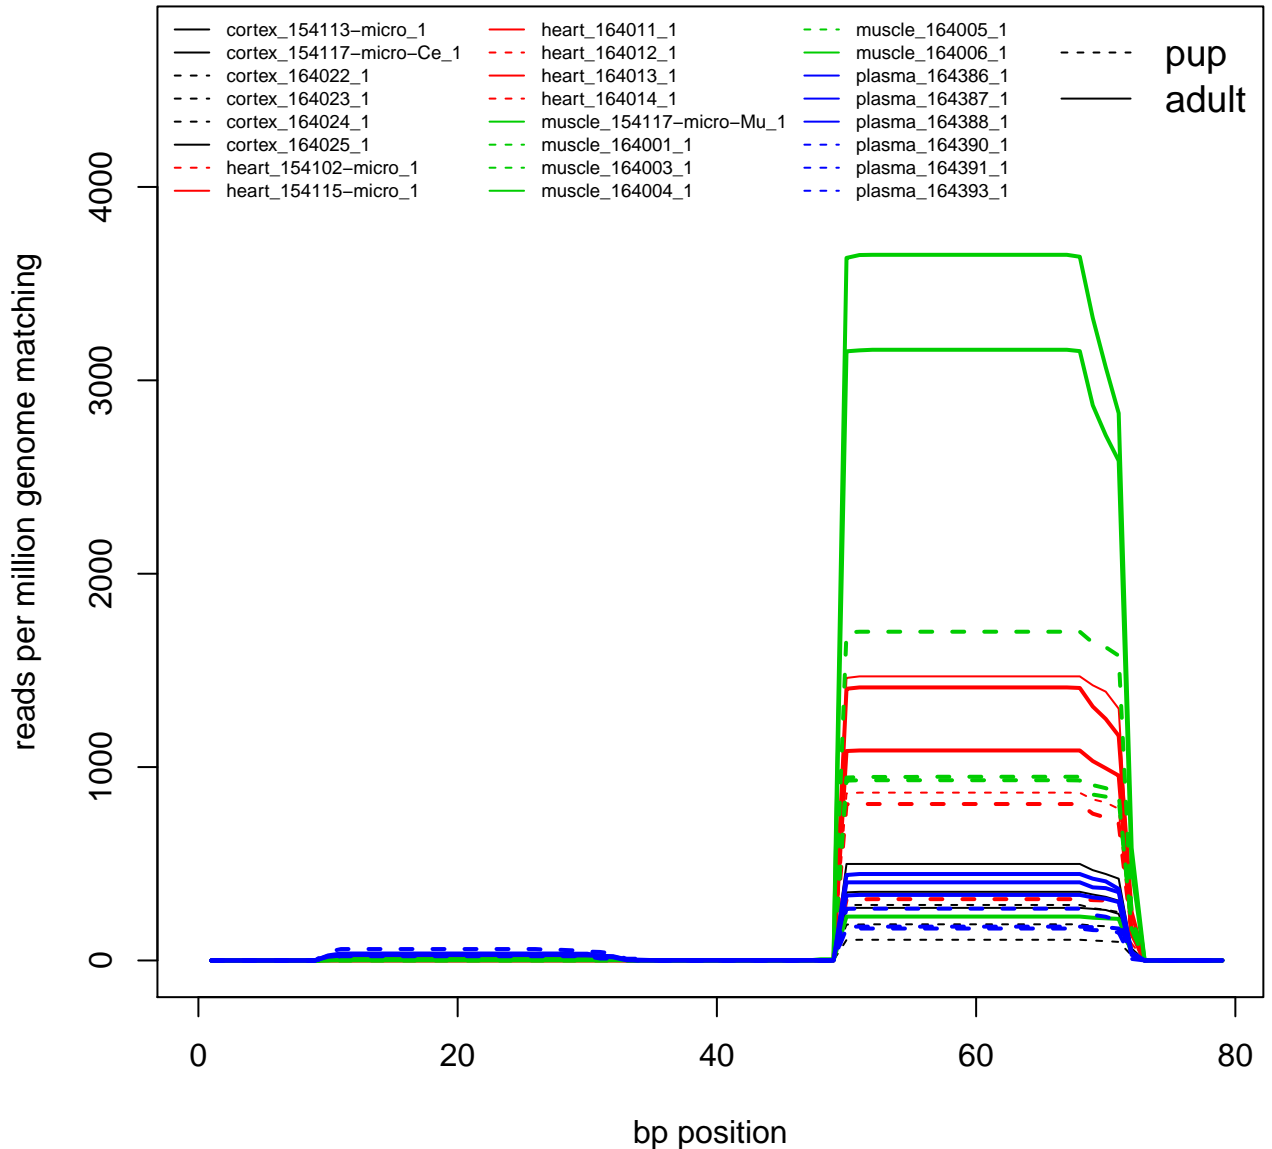

# lwe-miR-193a\_loc1

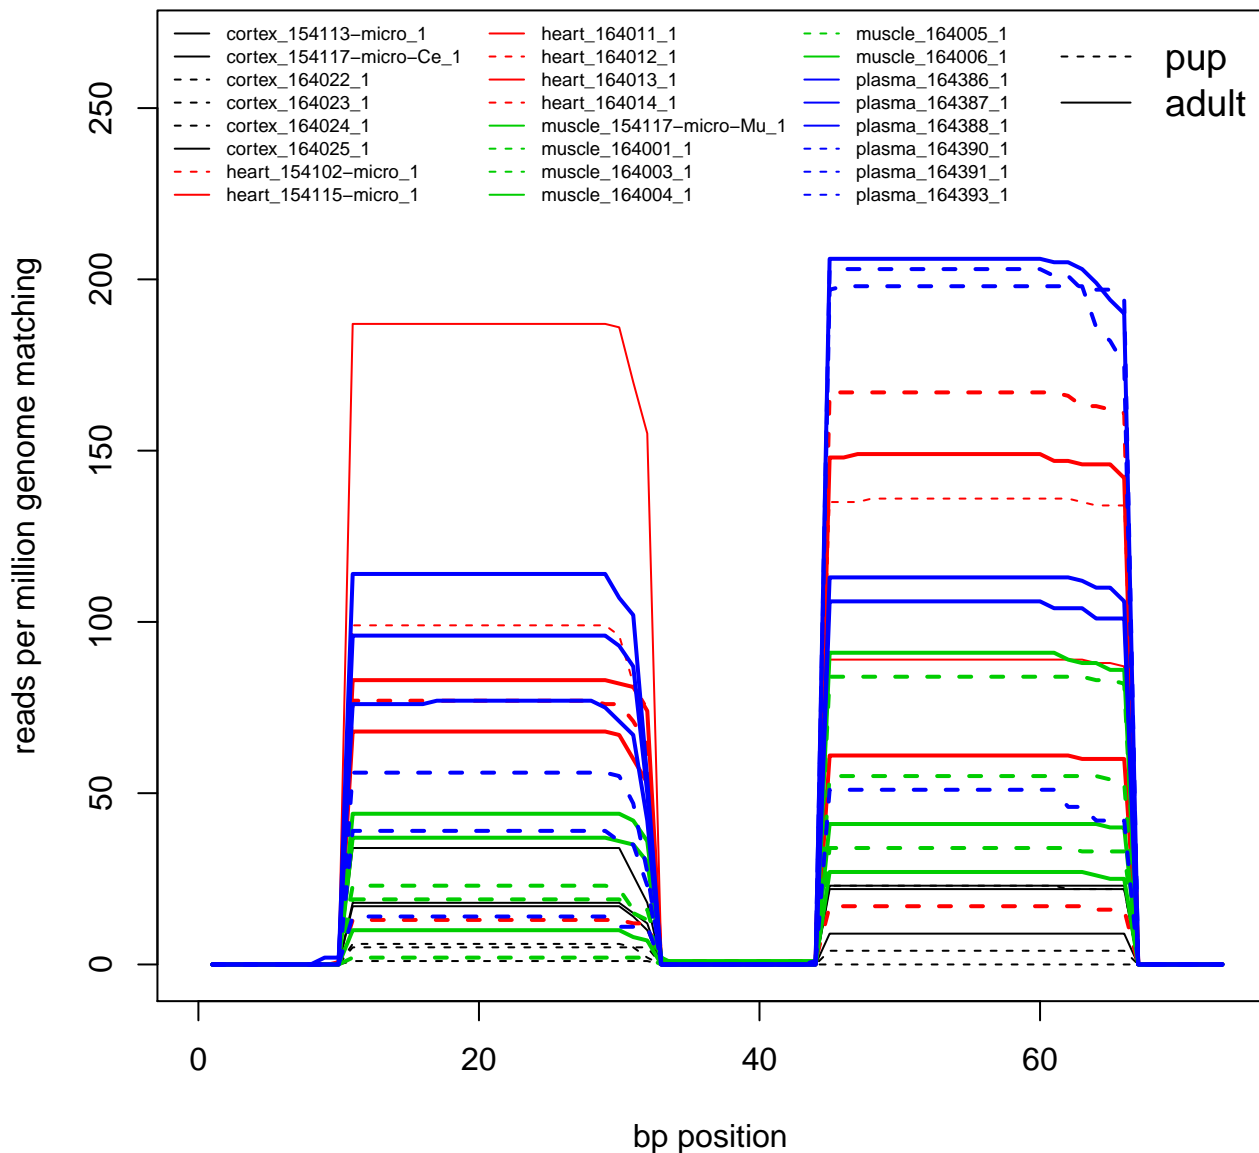

# novel\_64

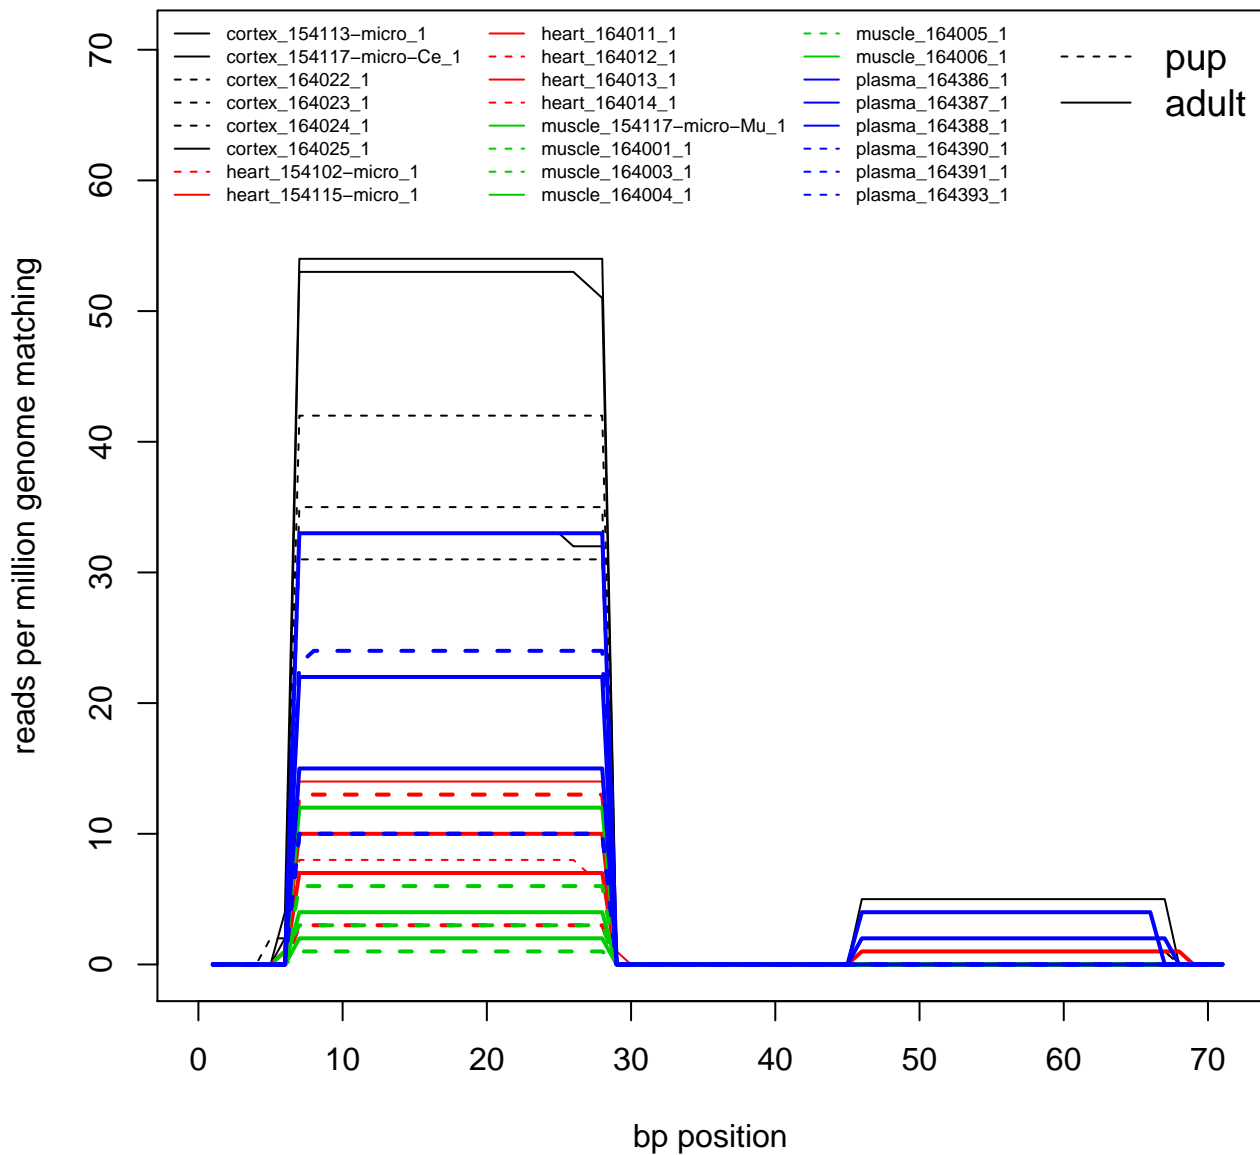



# novel\_66

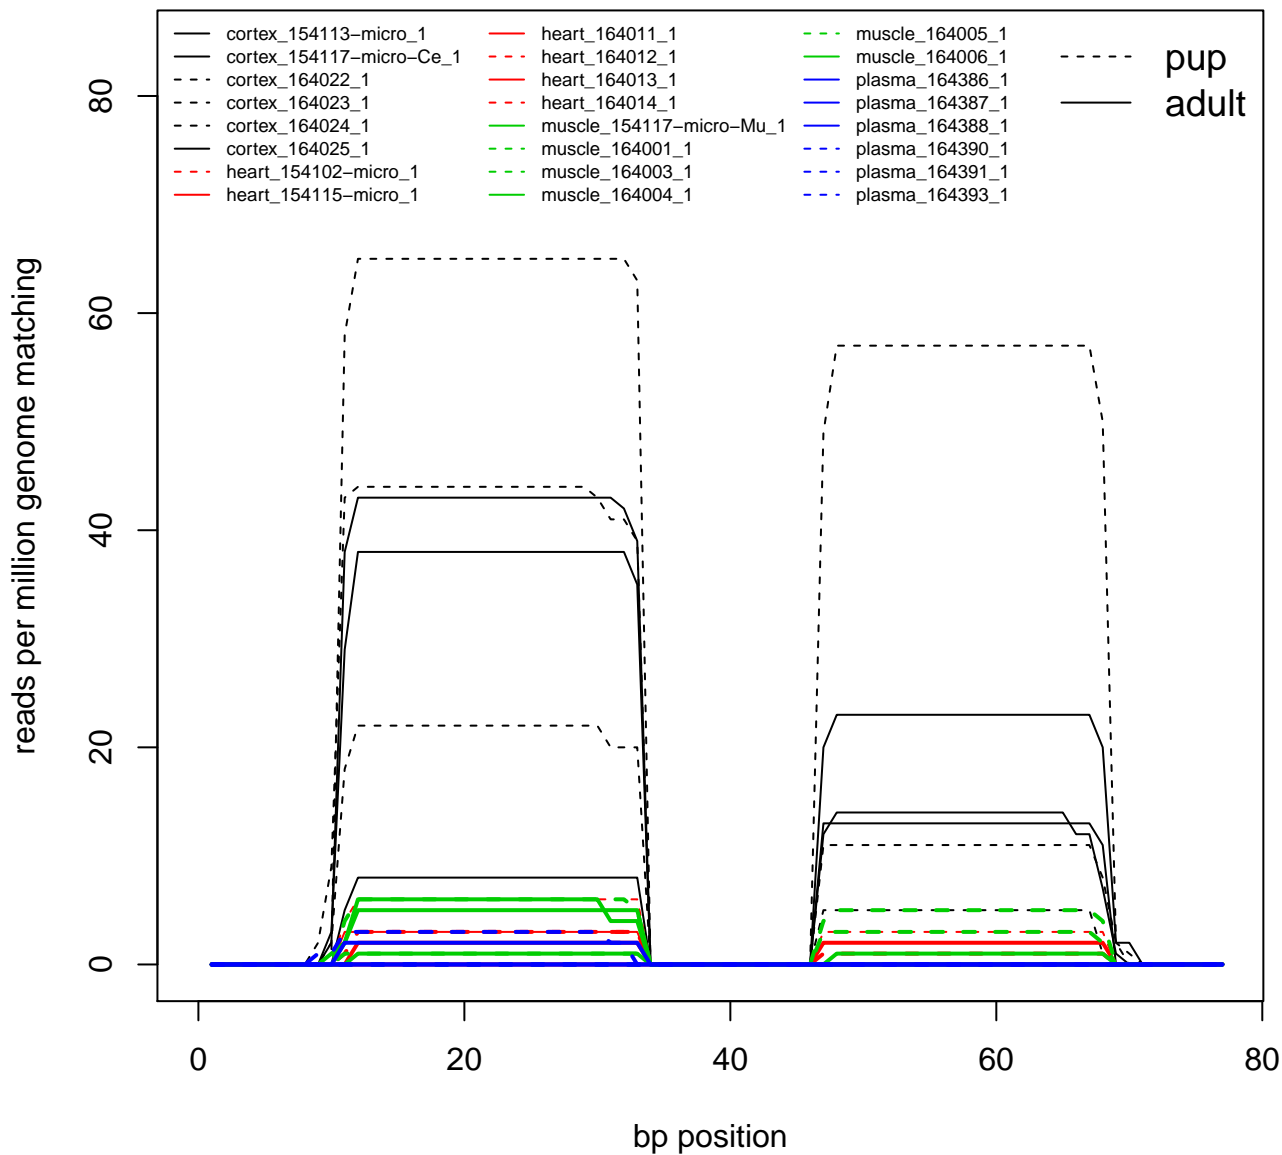

# lwe-miR-34b\_loc1

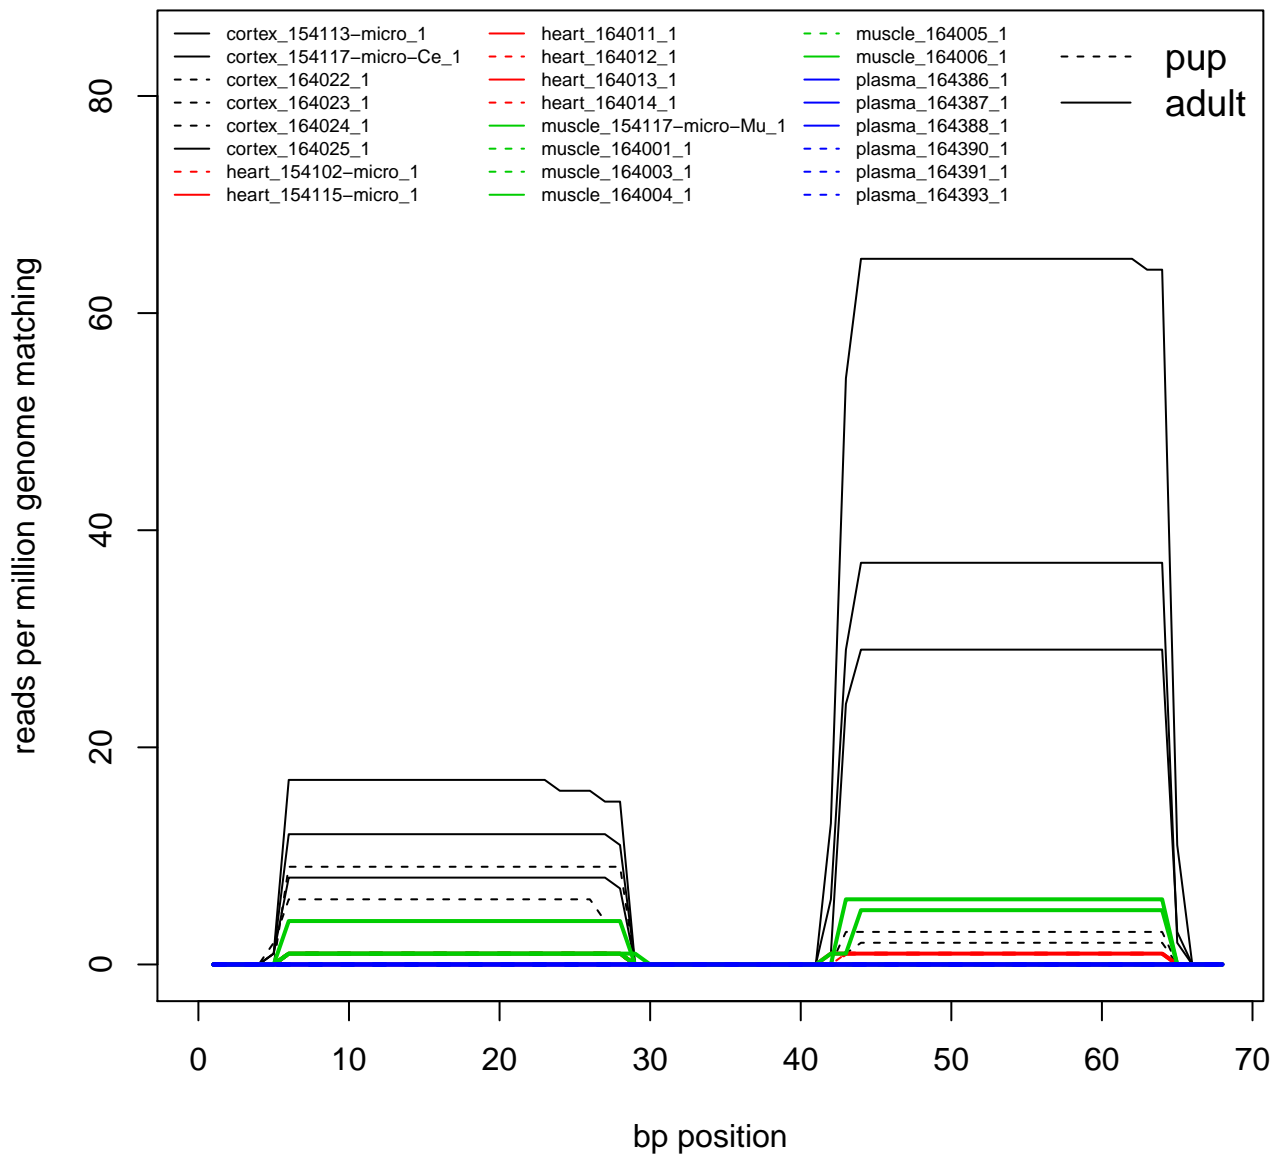

# lwe-miR-34a\_loc1

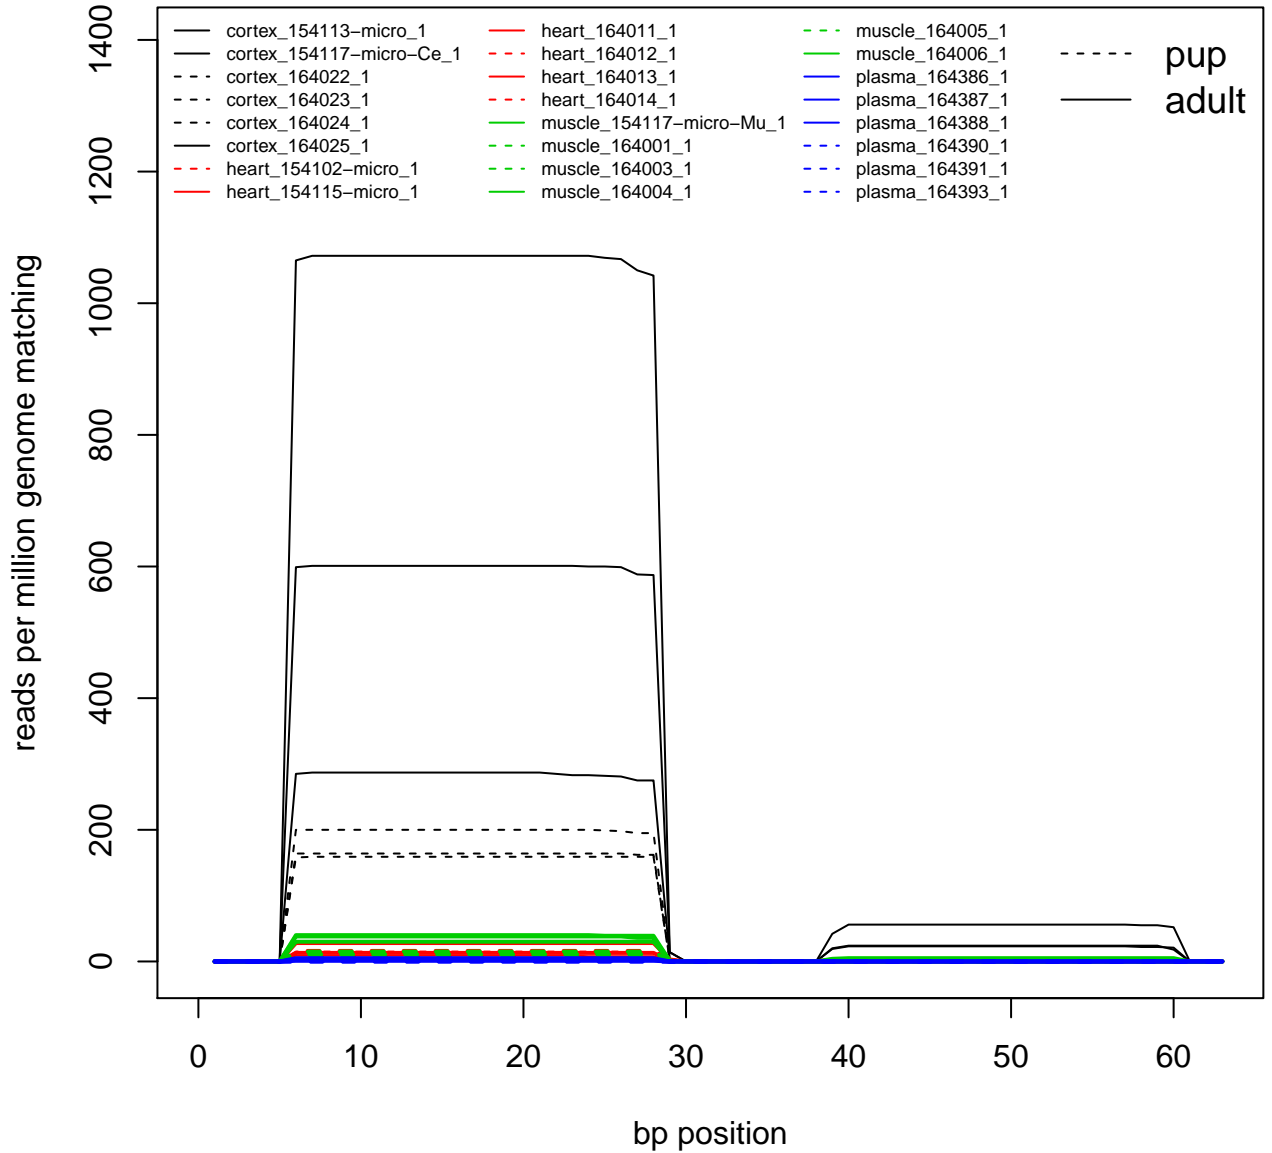





# lwe-miR-10\_loc1

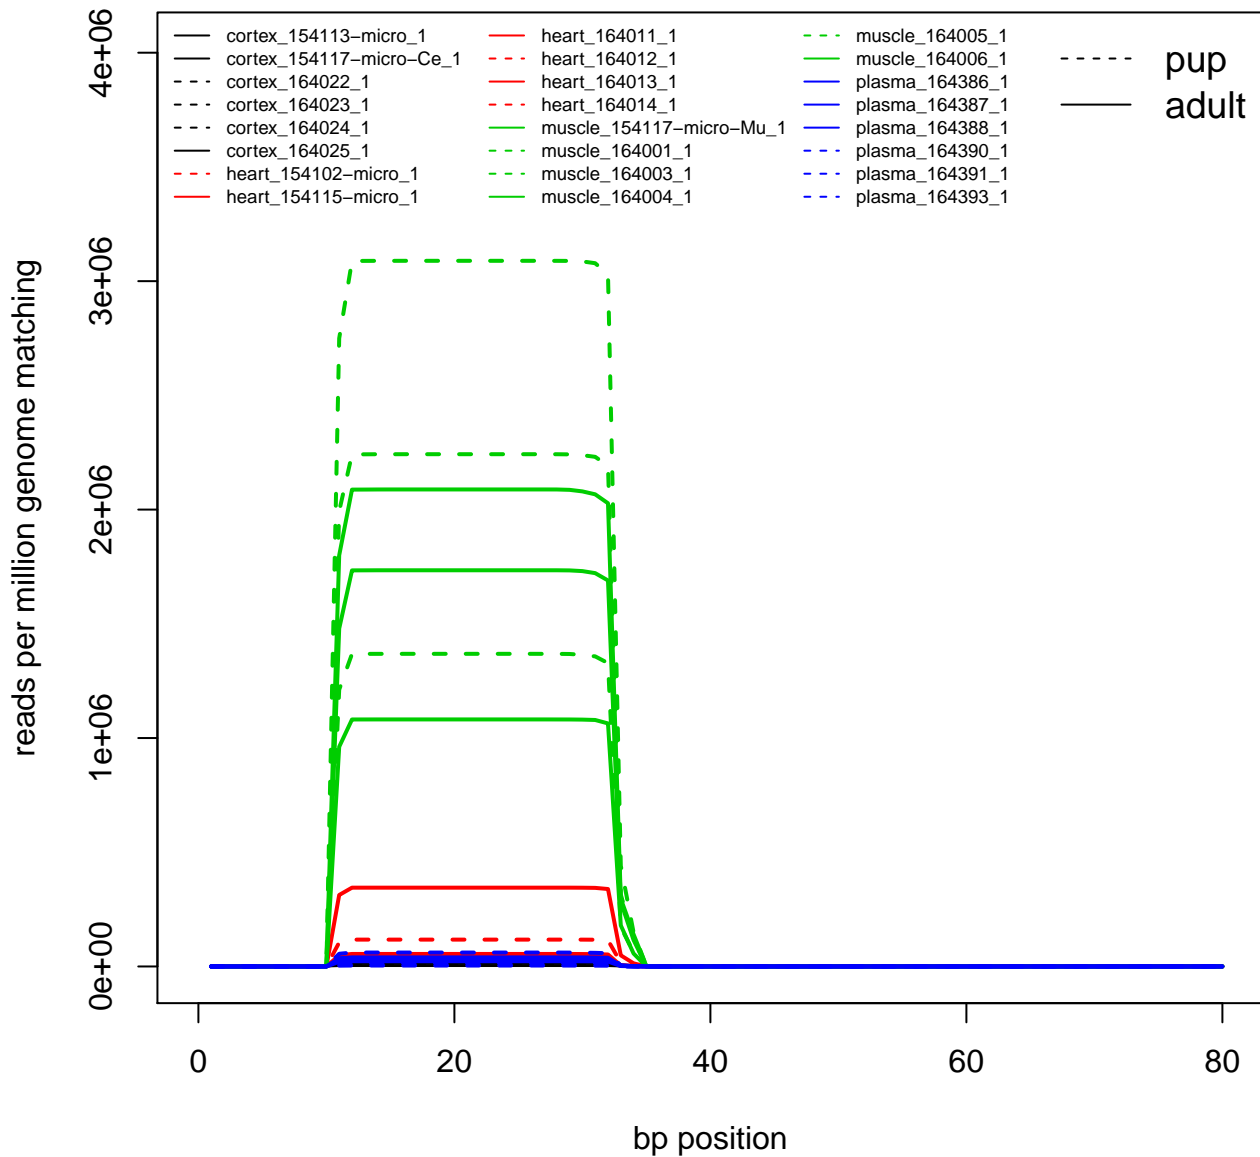

# novel\_68

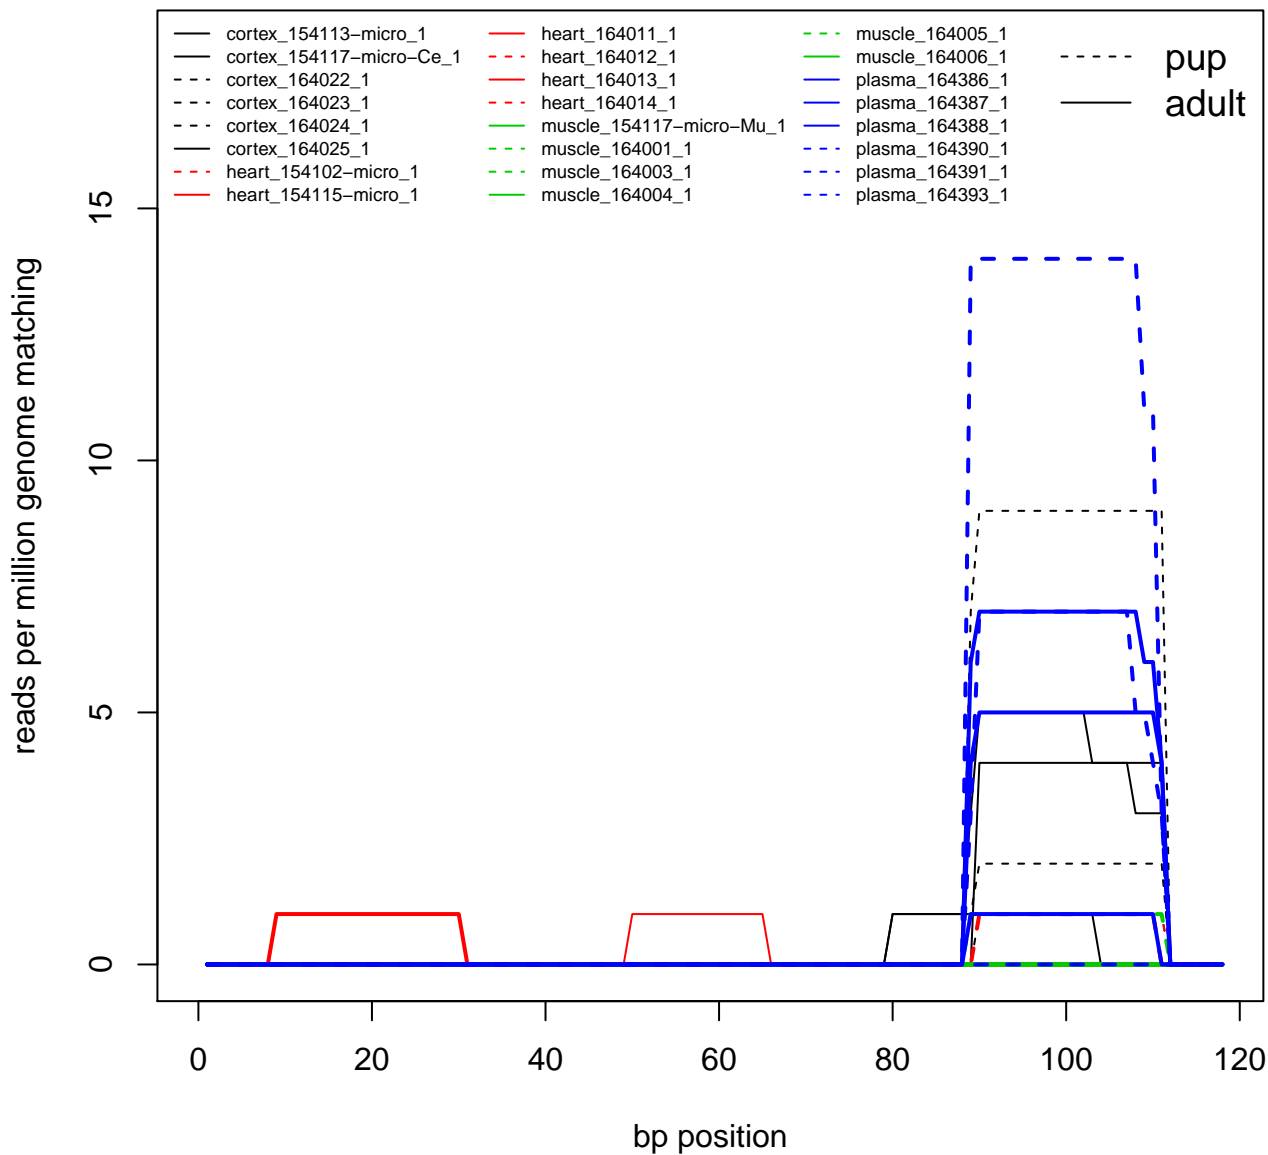



# lwe-miR-125a\_loc2

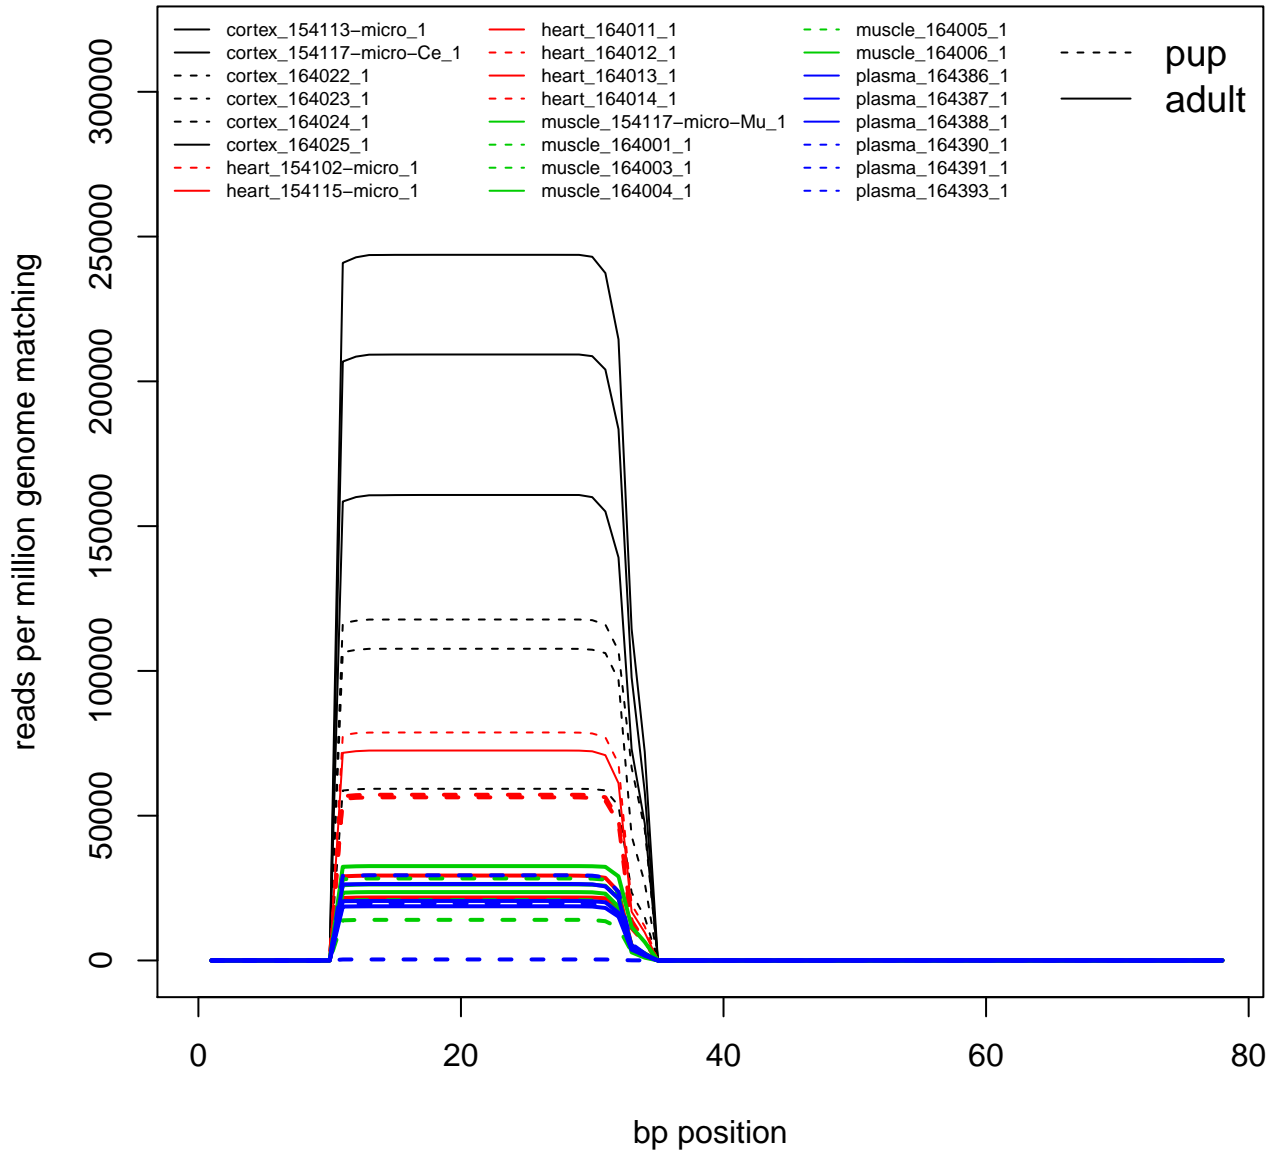



# lwe-miR-99b\_loc1

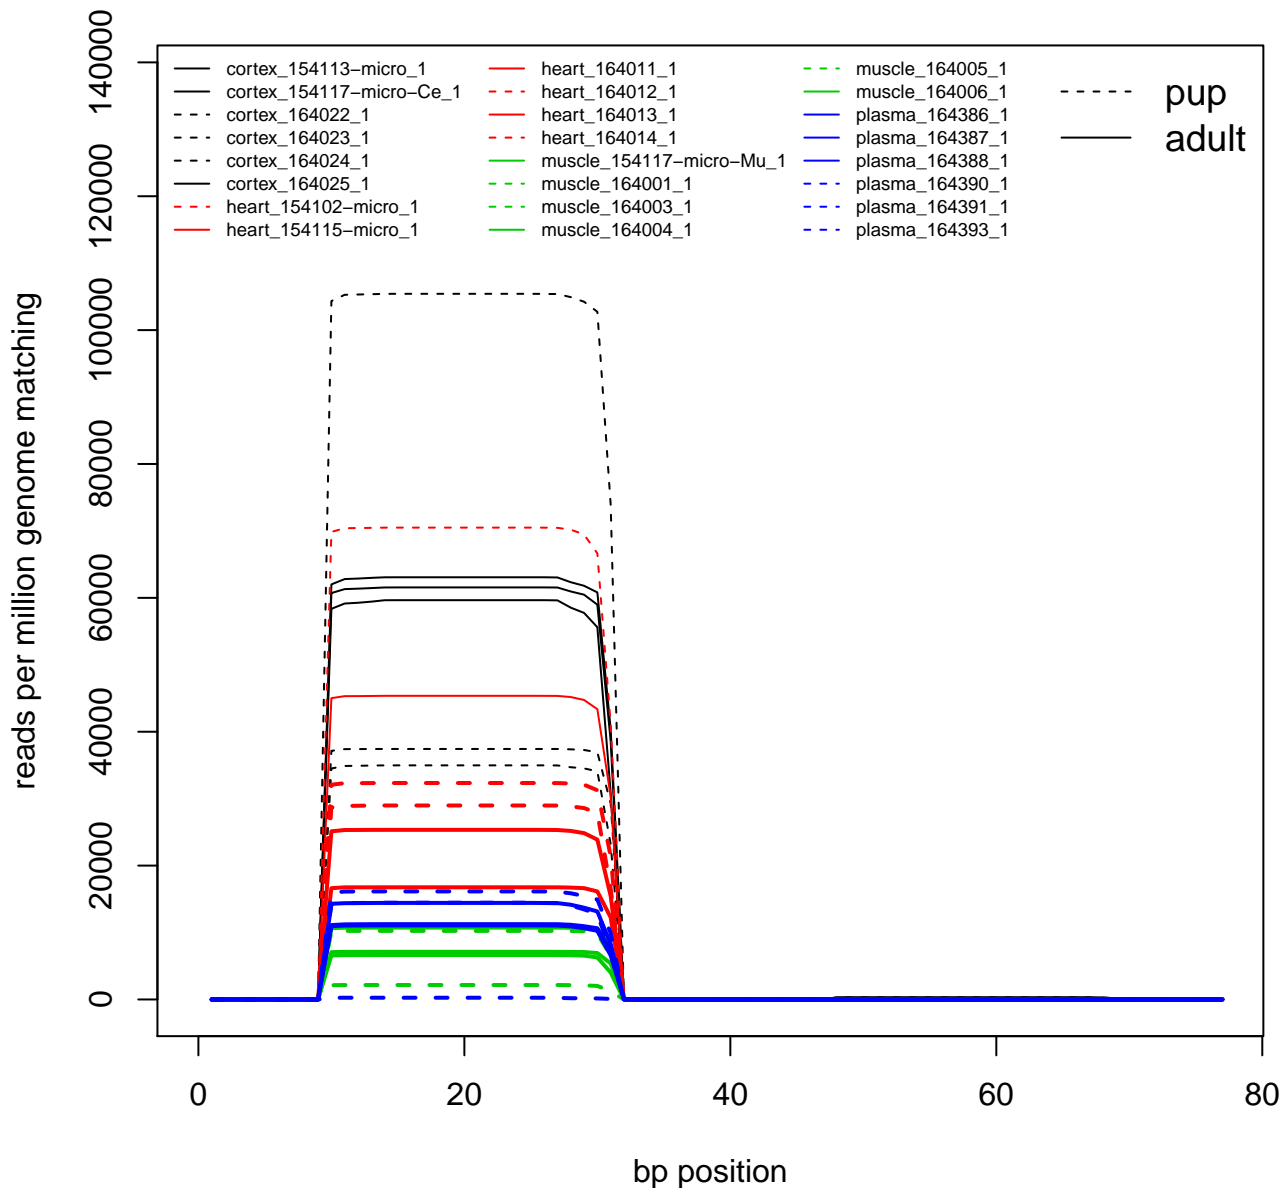

# novel\_69

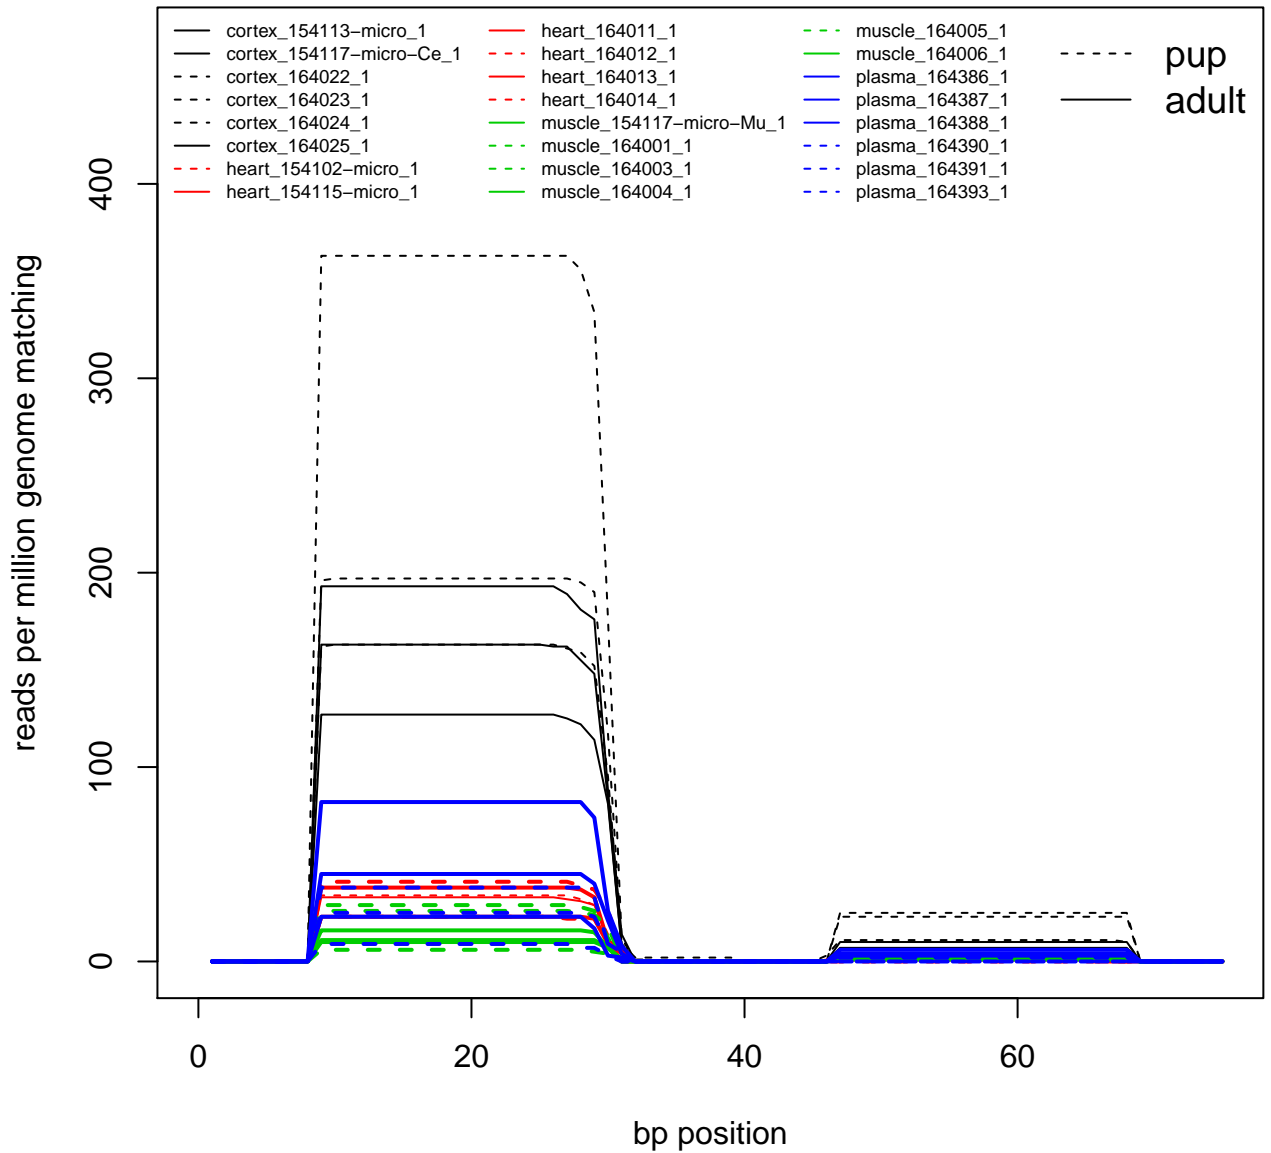



# lwe-miR-218a\_loc1

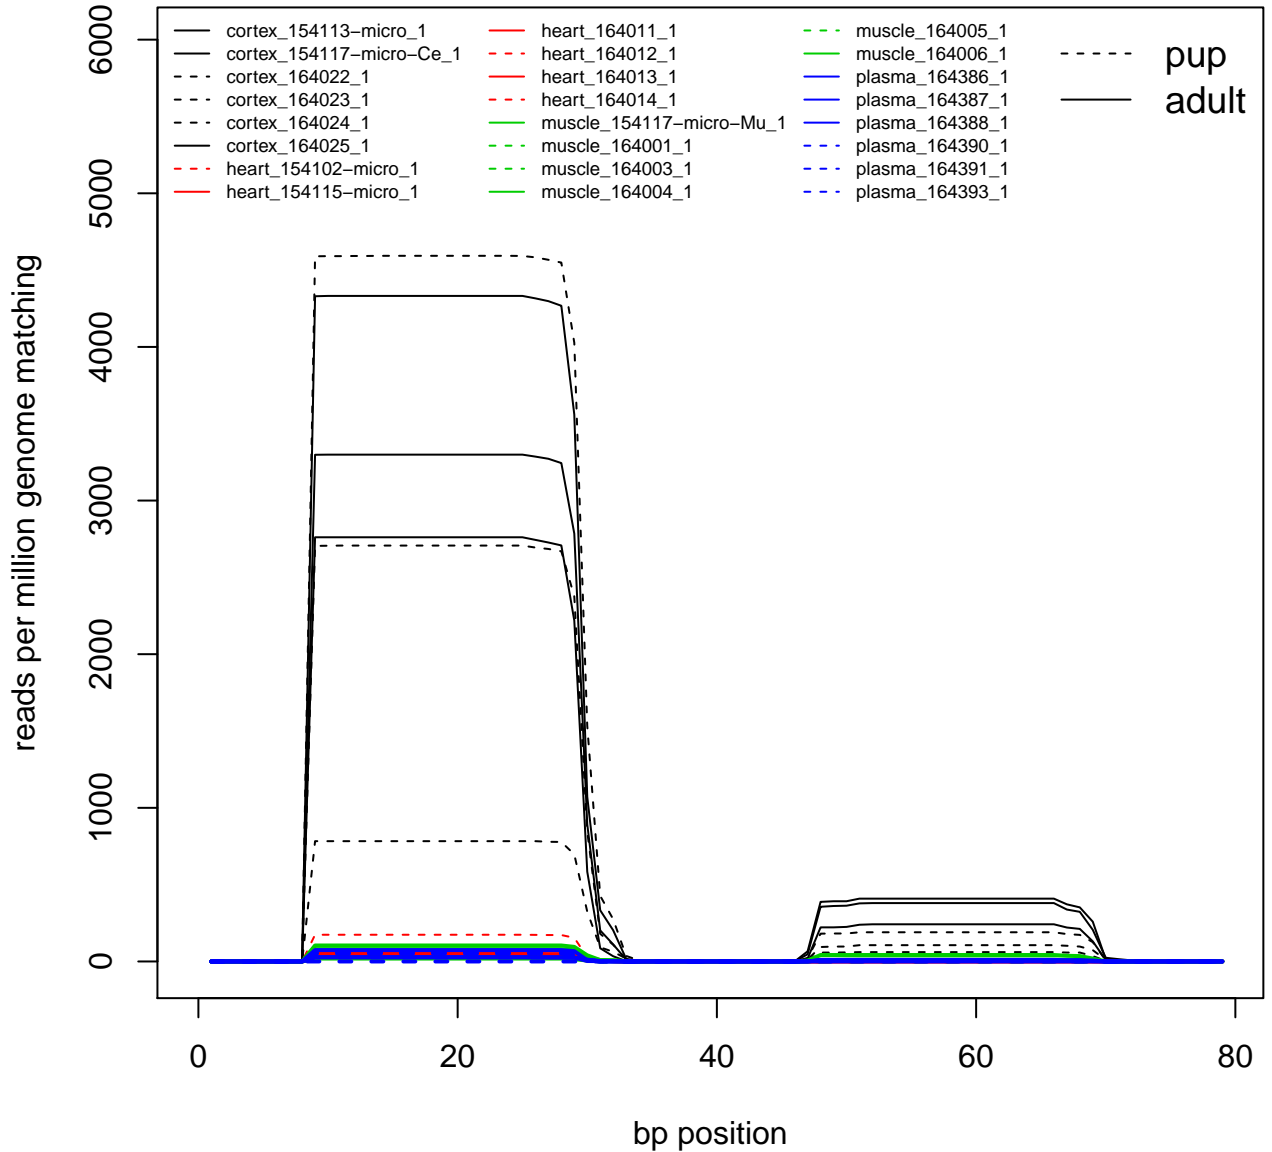

# novel\_70

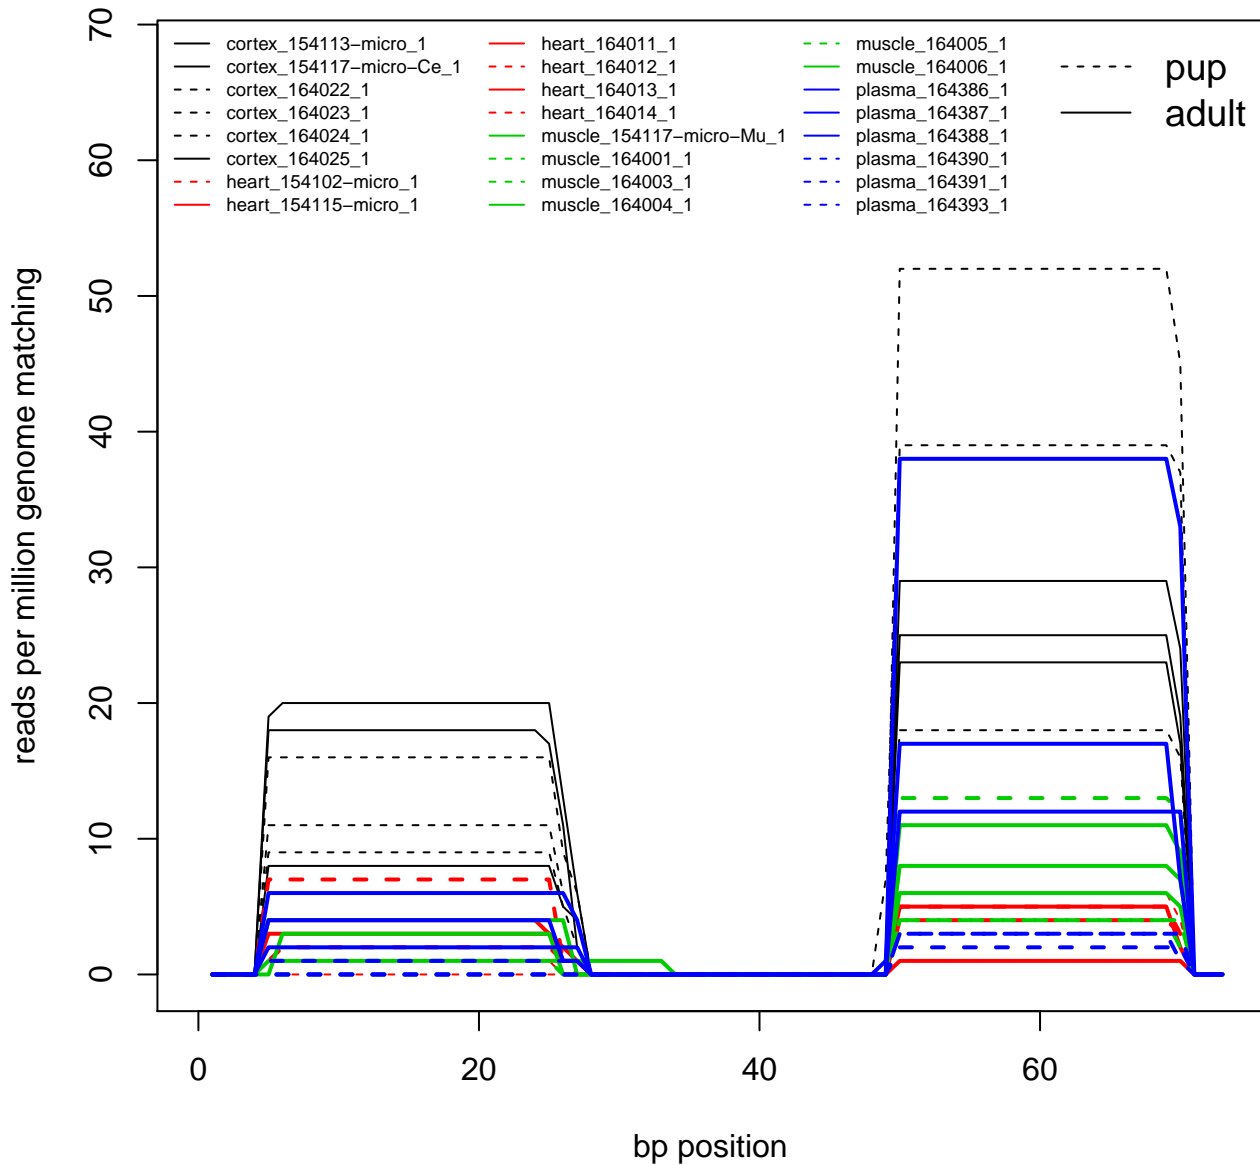

# lwe-miR-350\_loc1

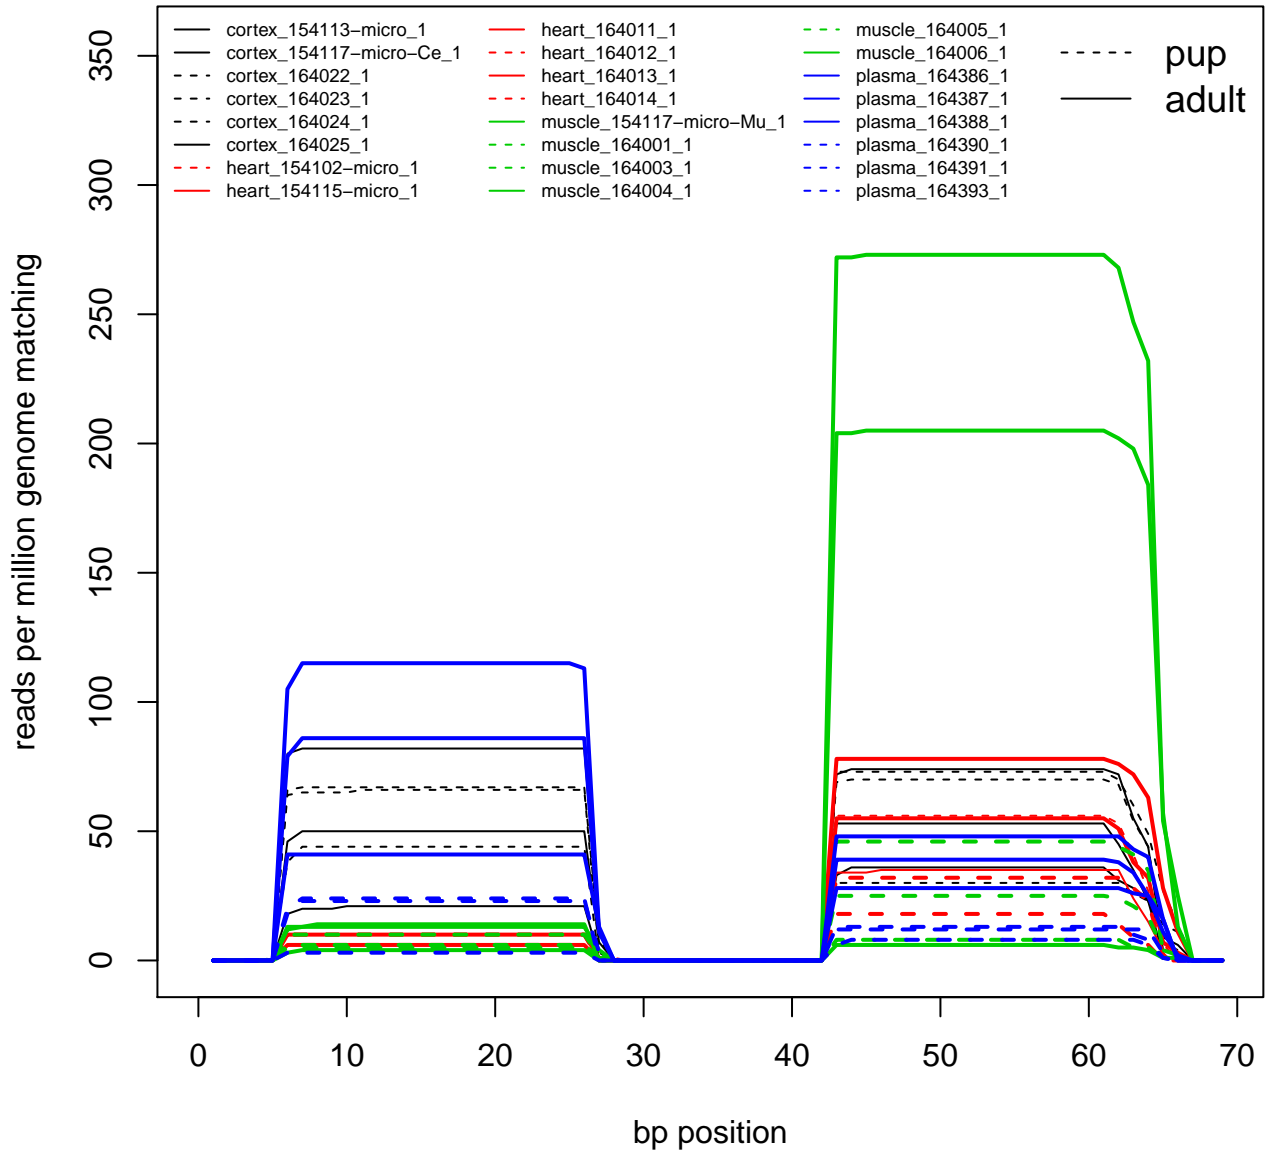

# lwe-miR-26\_loc1

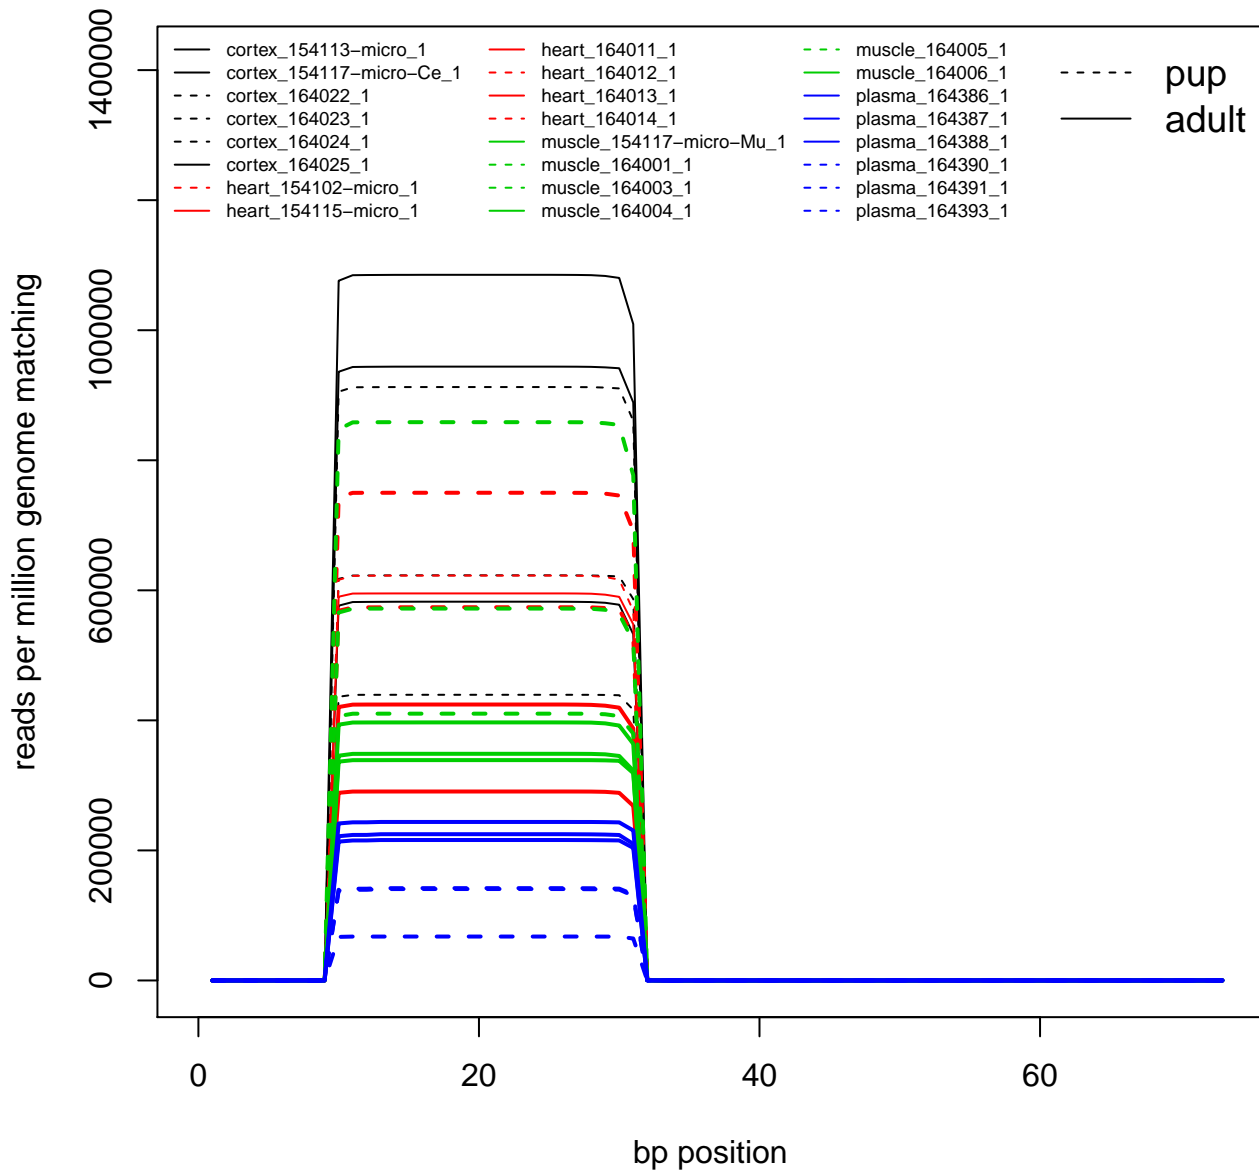

# novel\_71

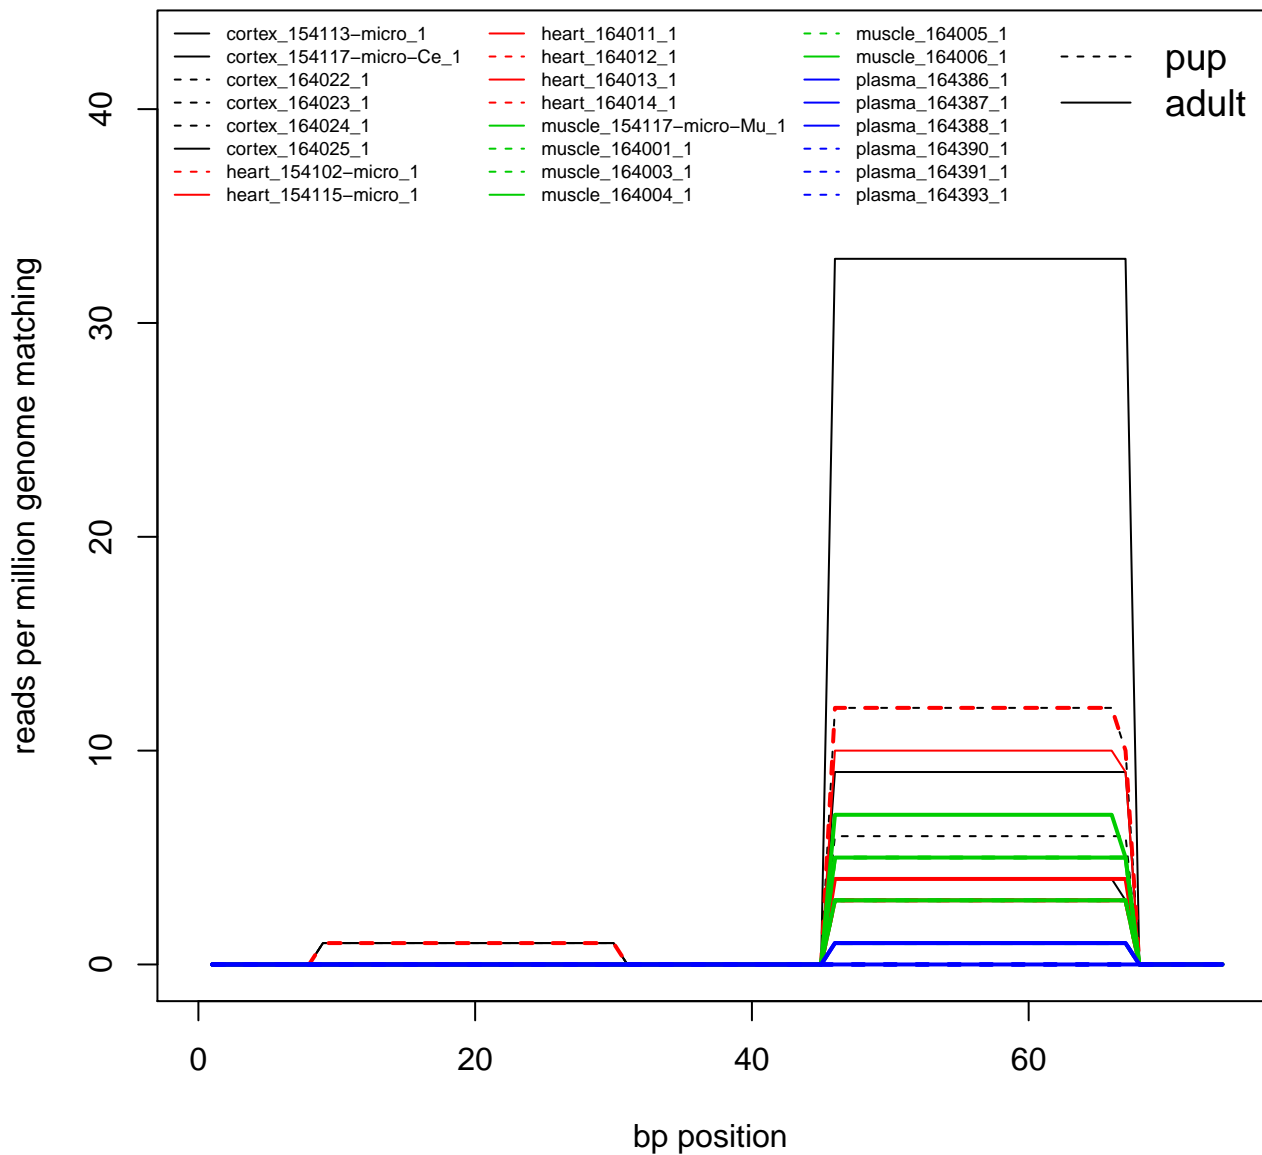

# lwe-miR-138\_loc1

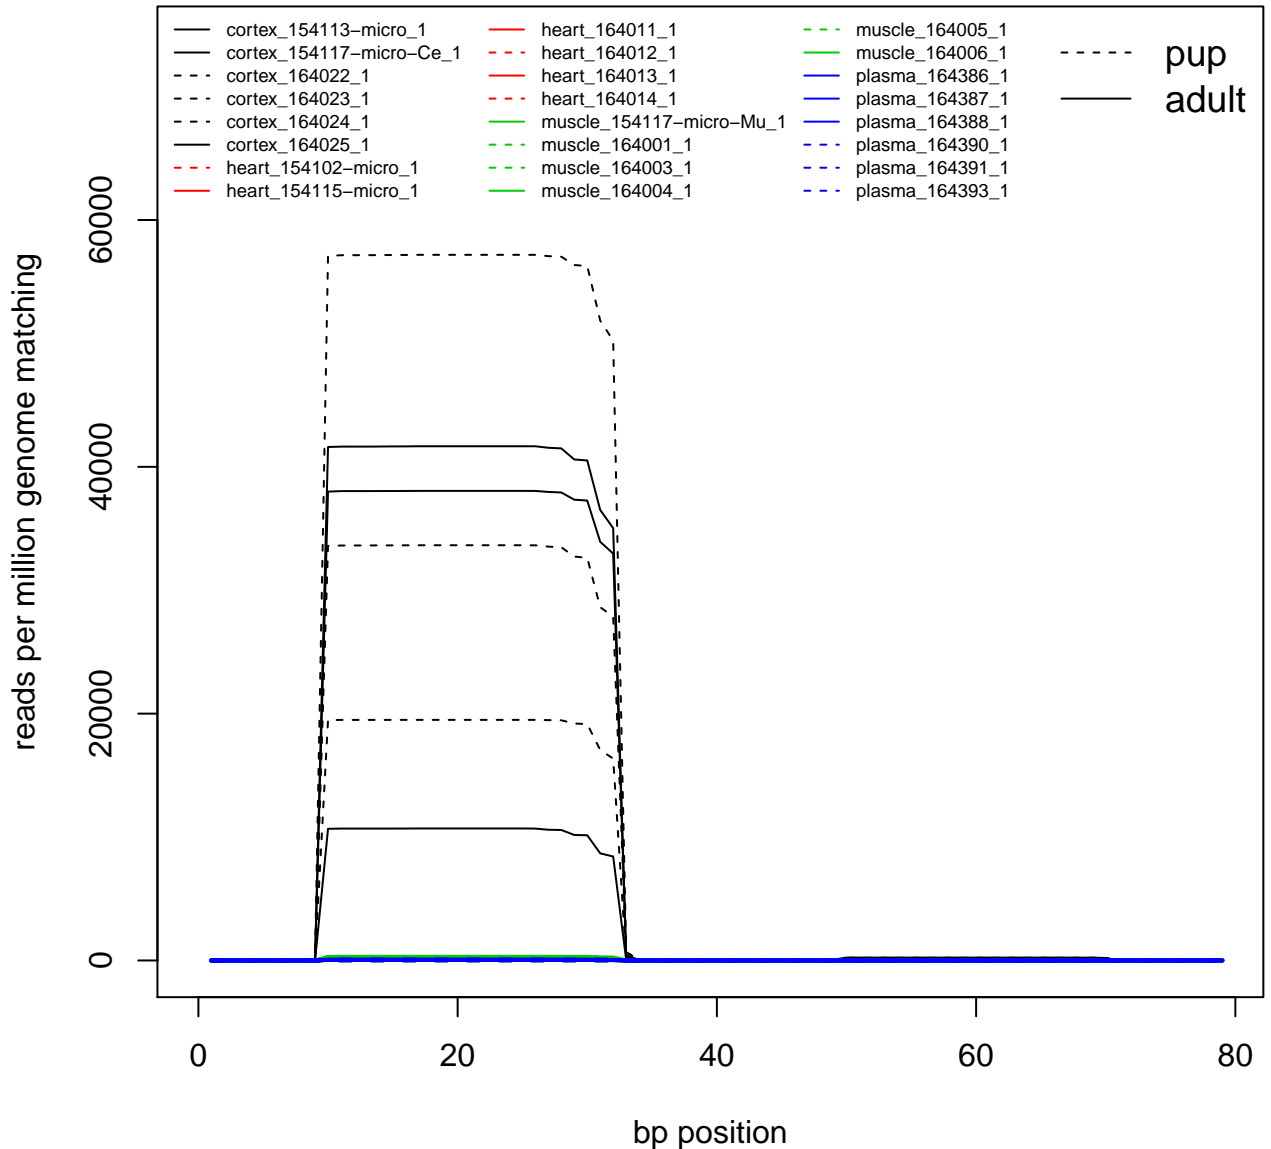

# lwe-miR-21a\_loc1

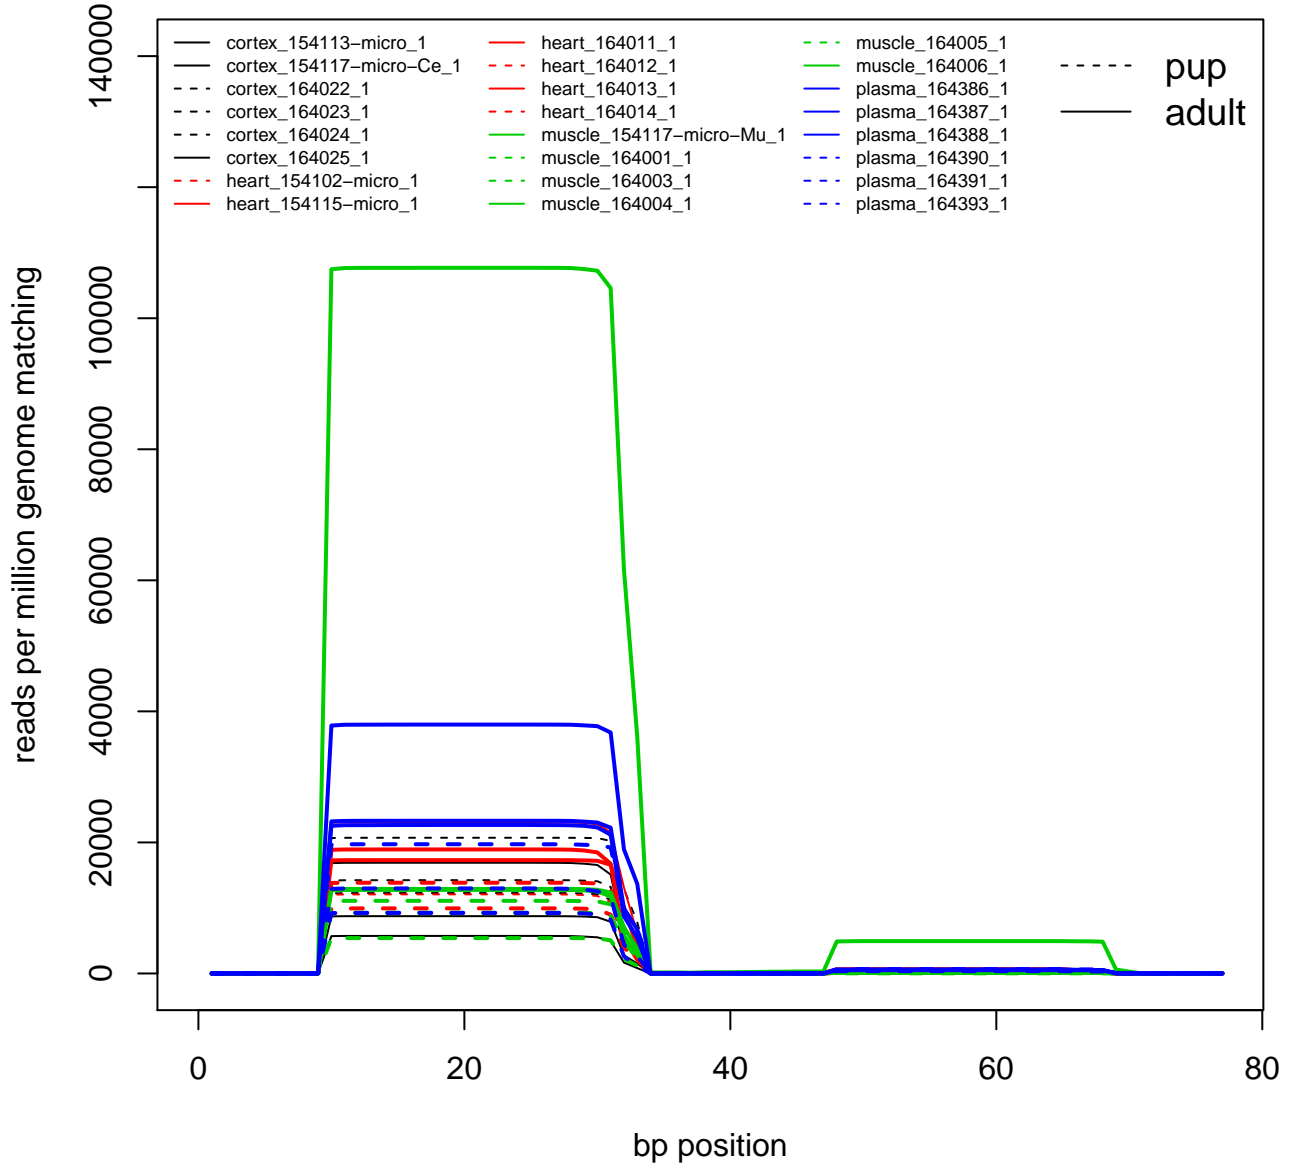

# novel\_72

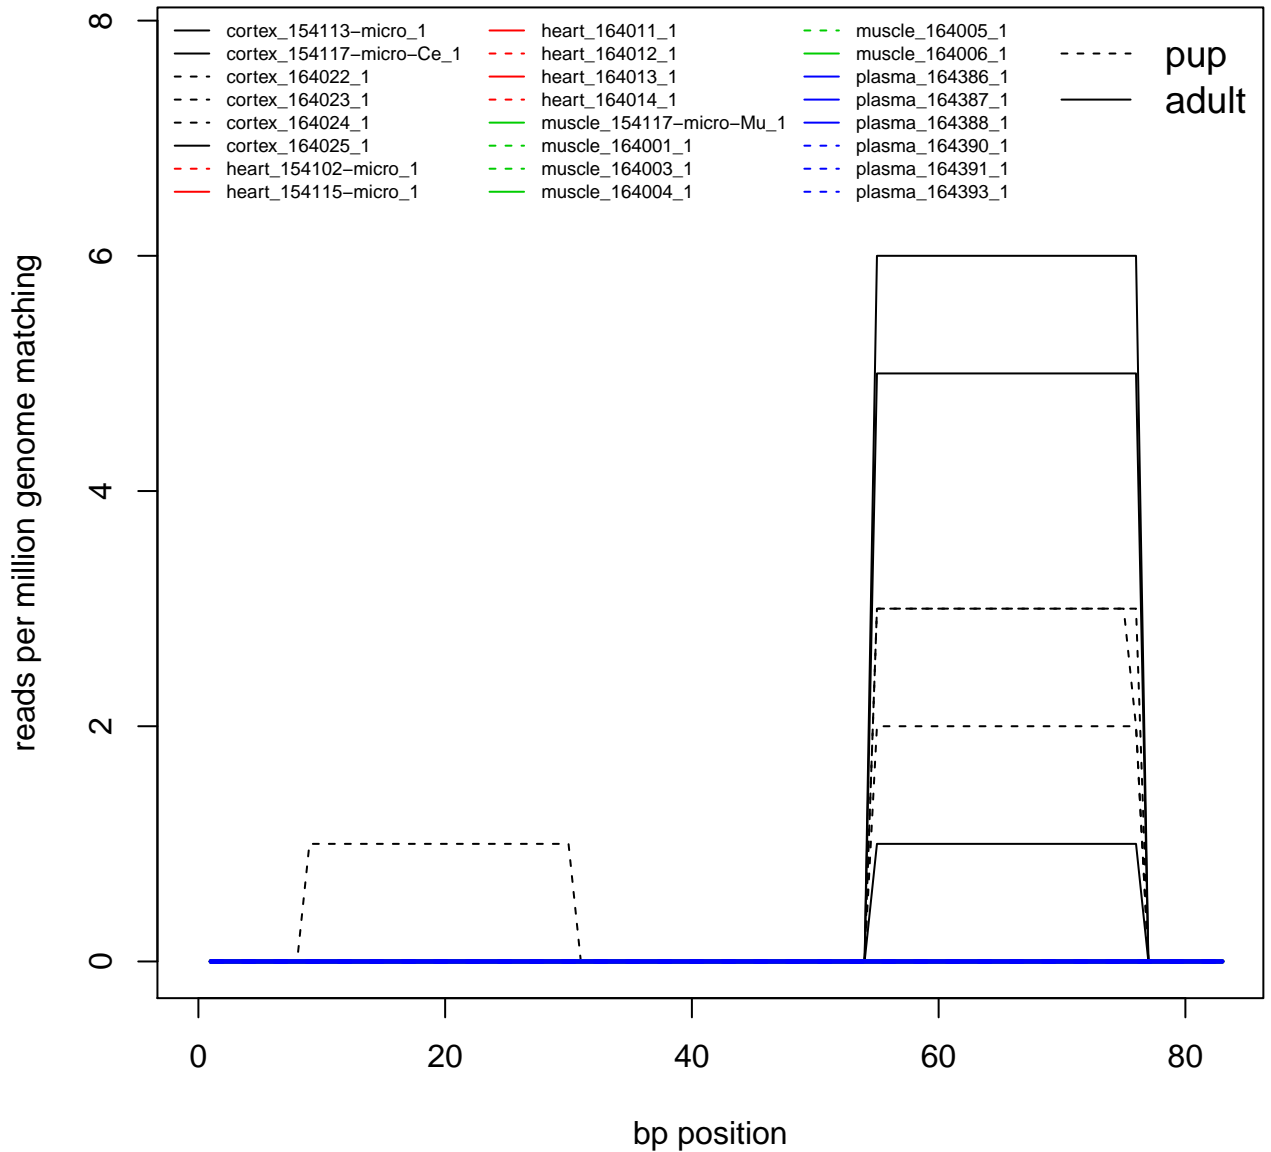



# lwe-miR-33a\_loc1

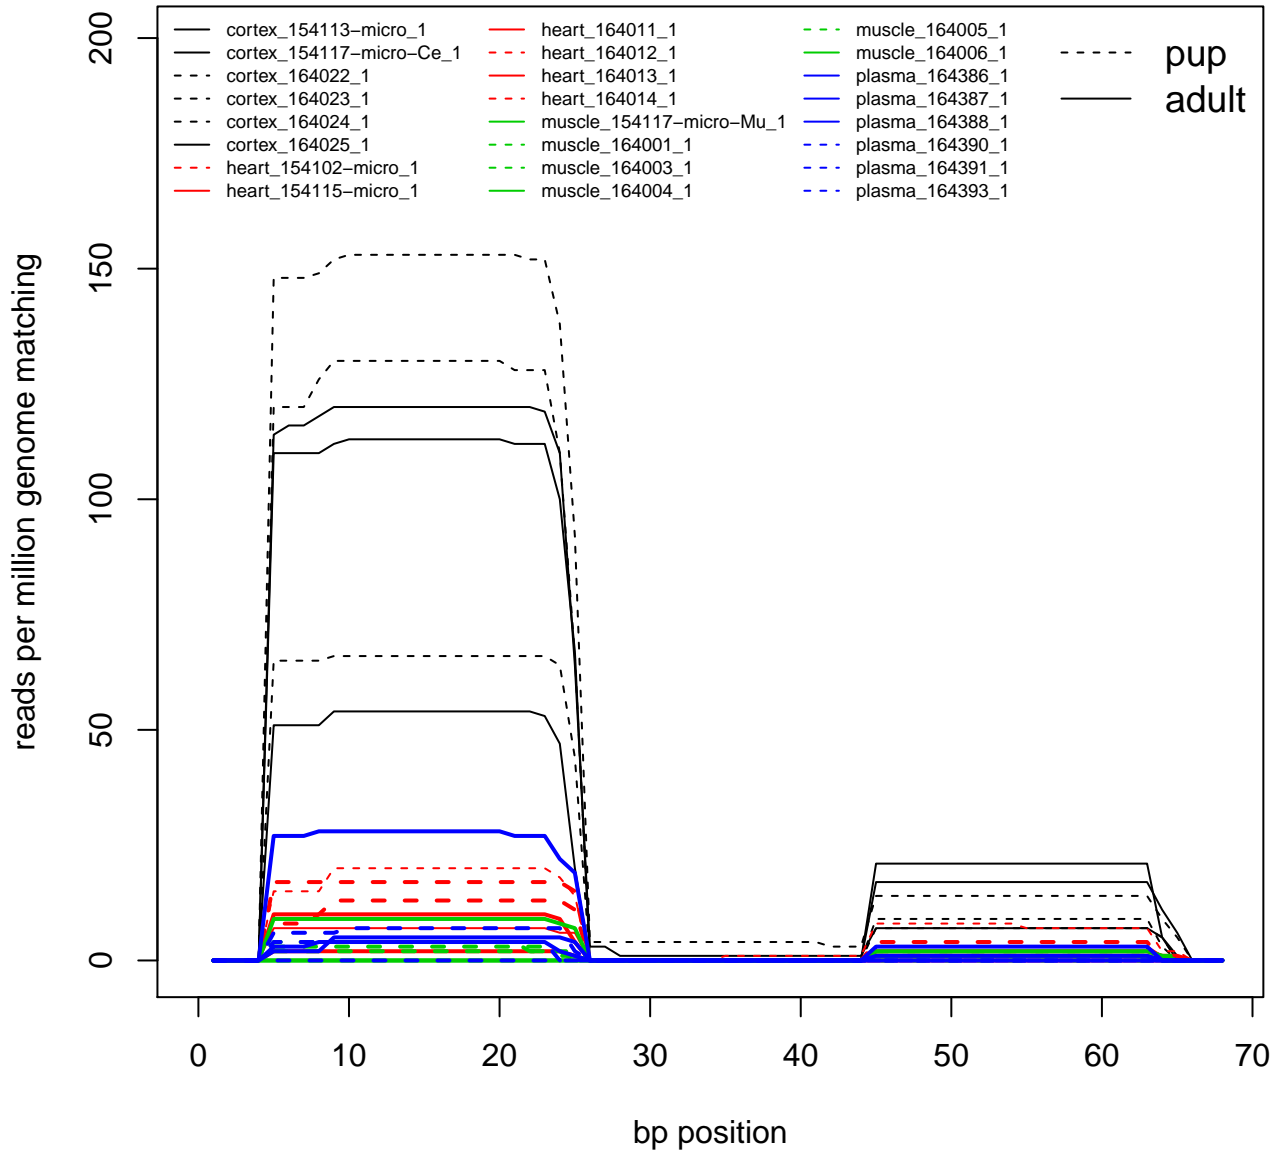

# let-7i\_loc1

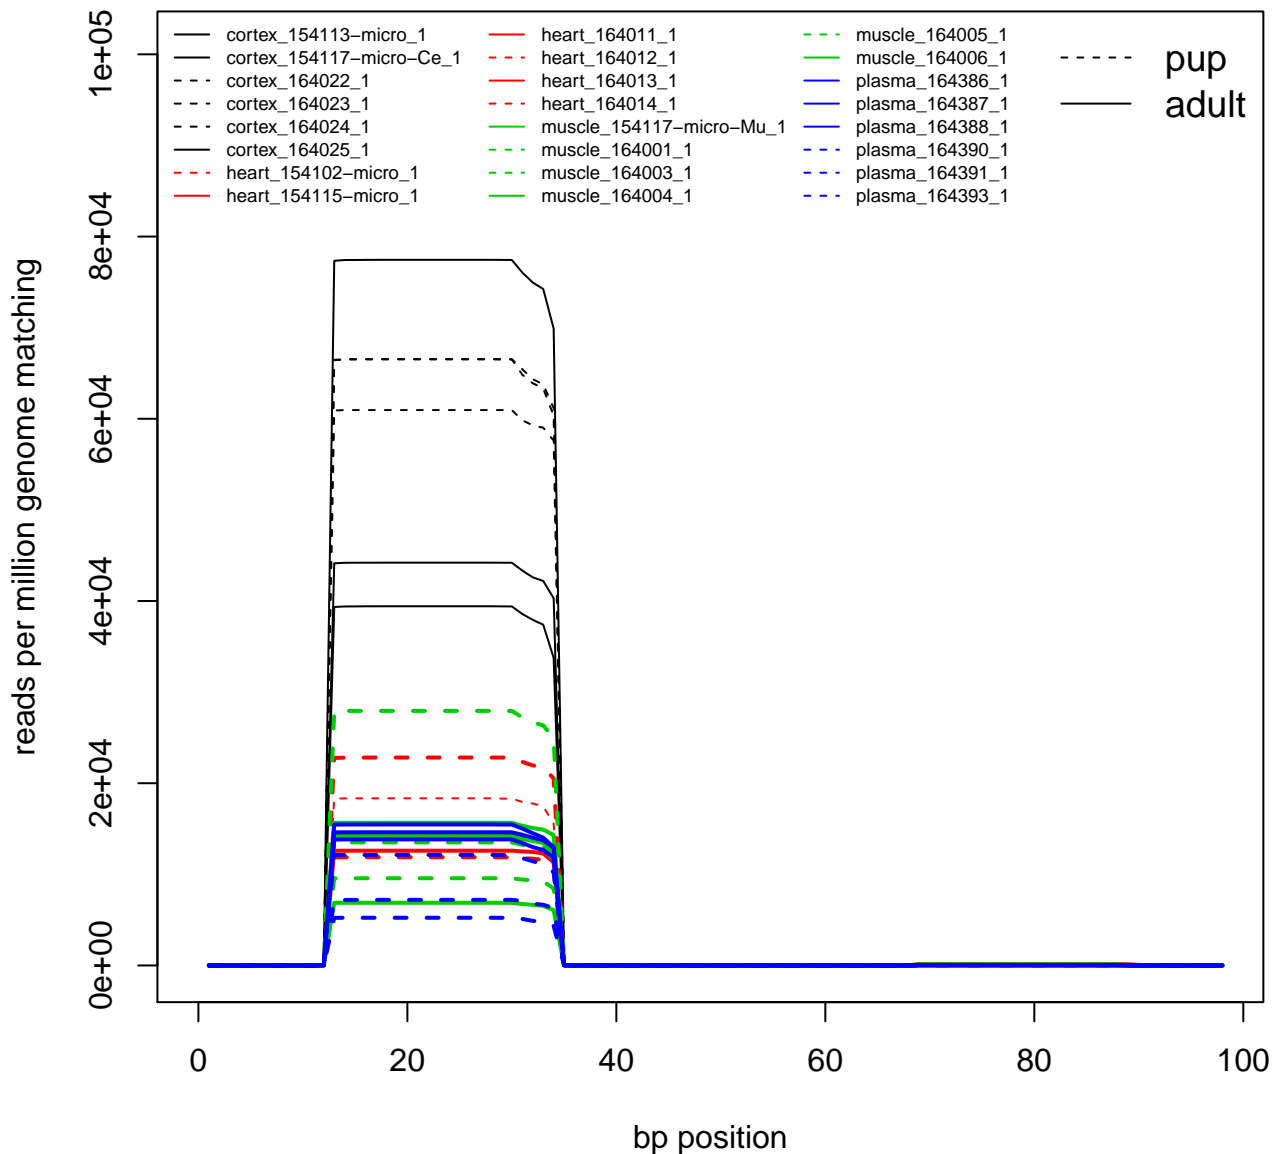

# lwe-miR-378a\_loc1

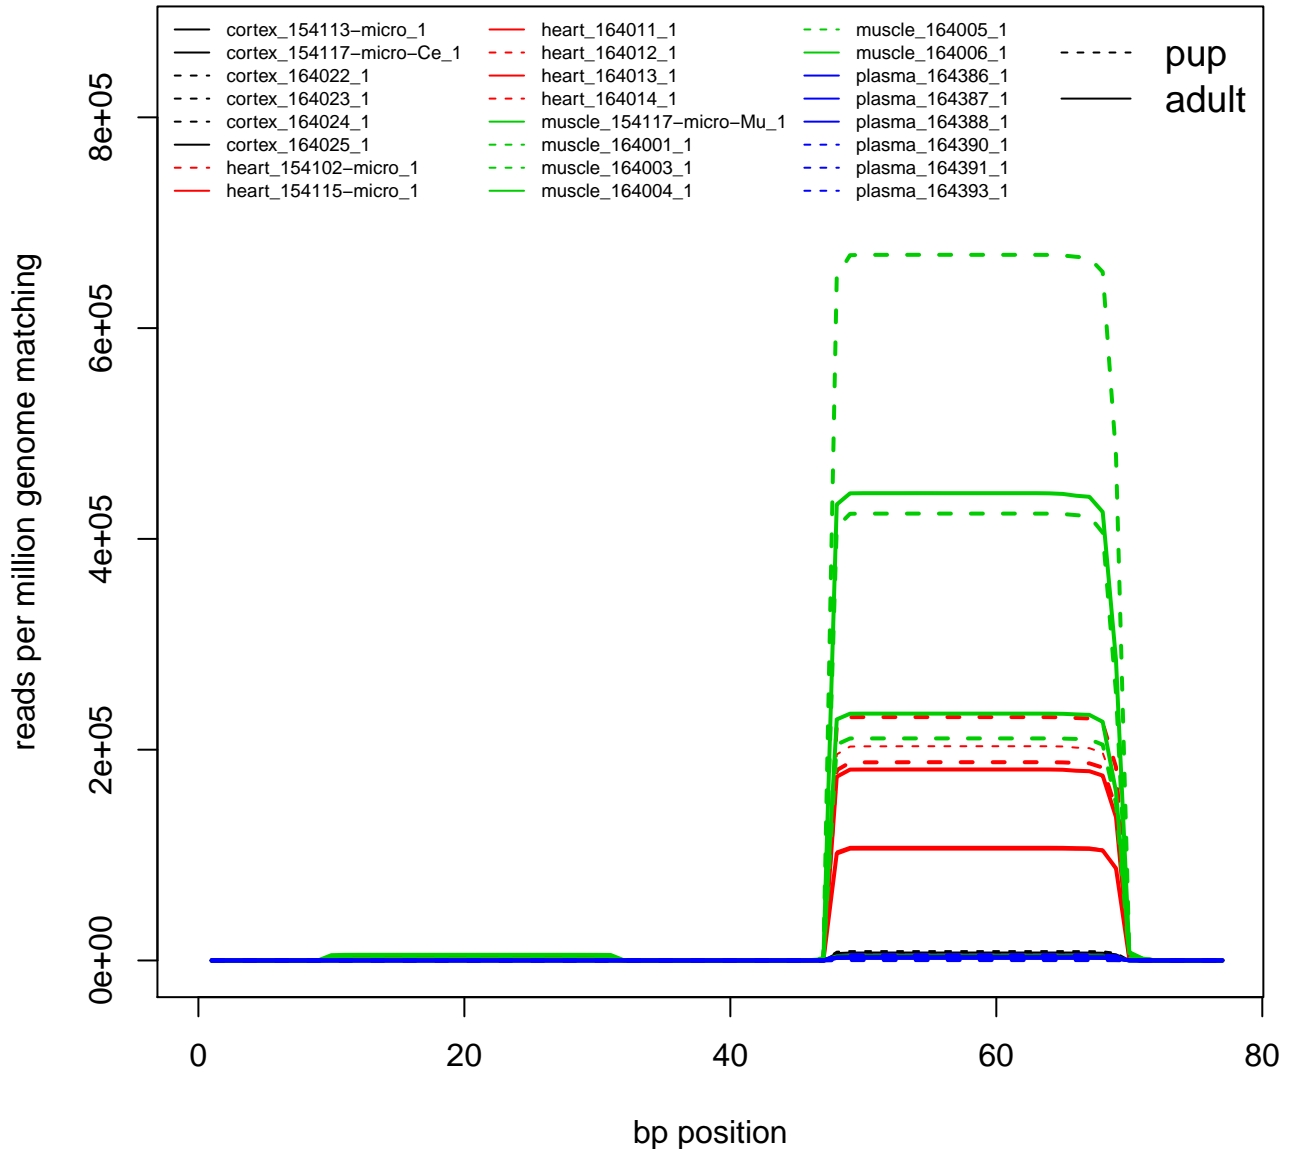

# lwe-miR-551b\_loc1

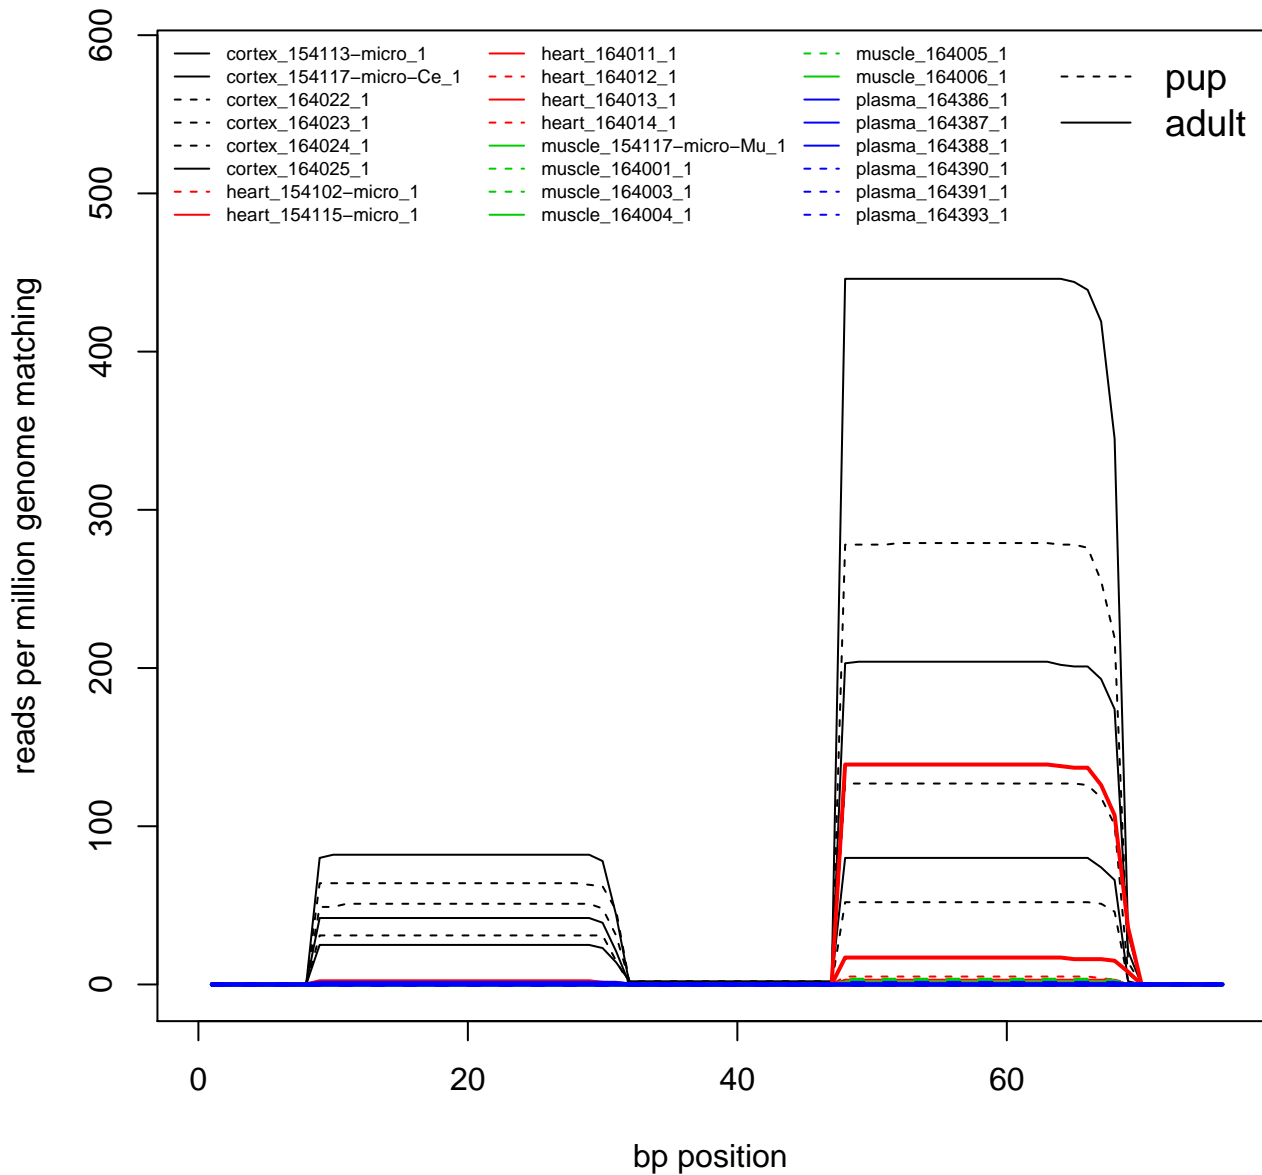

# novel\_73

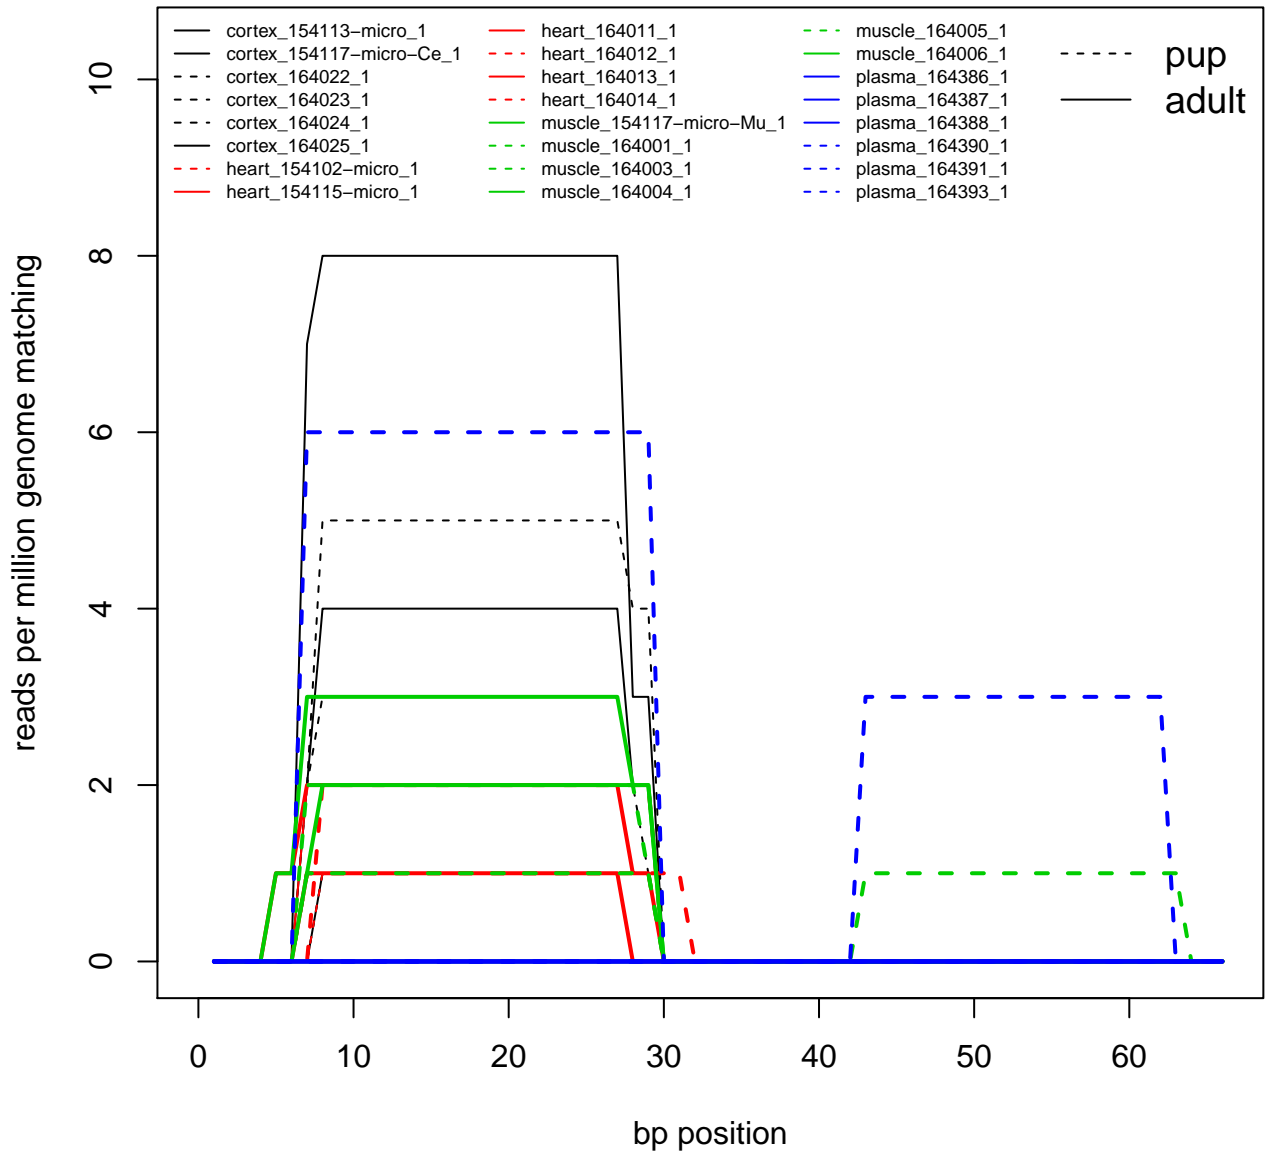

# lwe-miR-132\_loc1

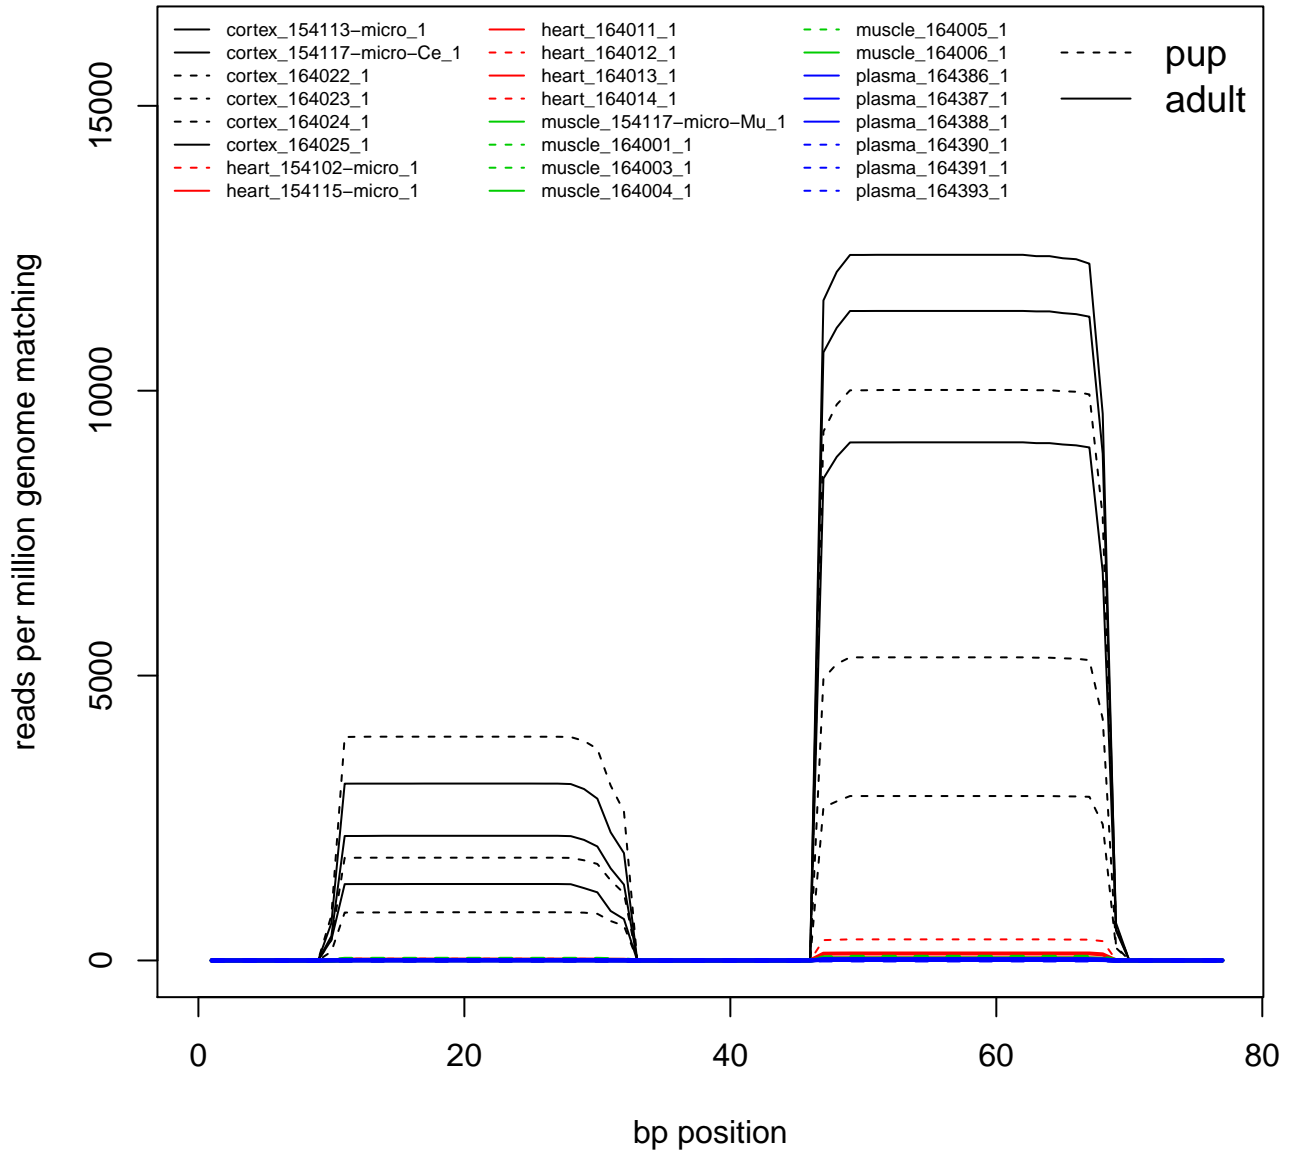

# lwe-miR-212\_loc1

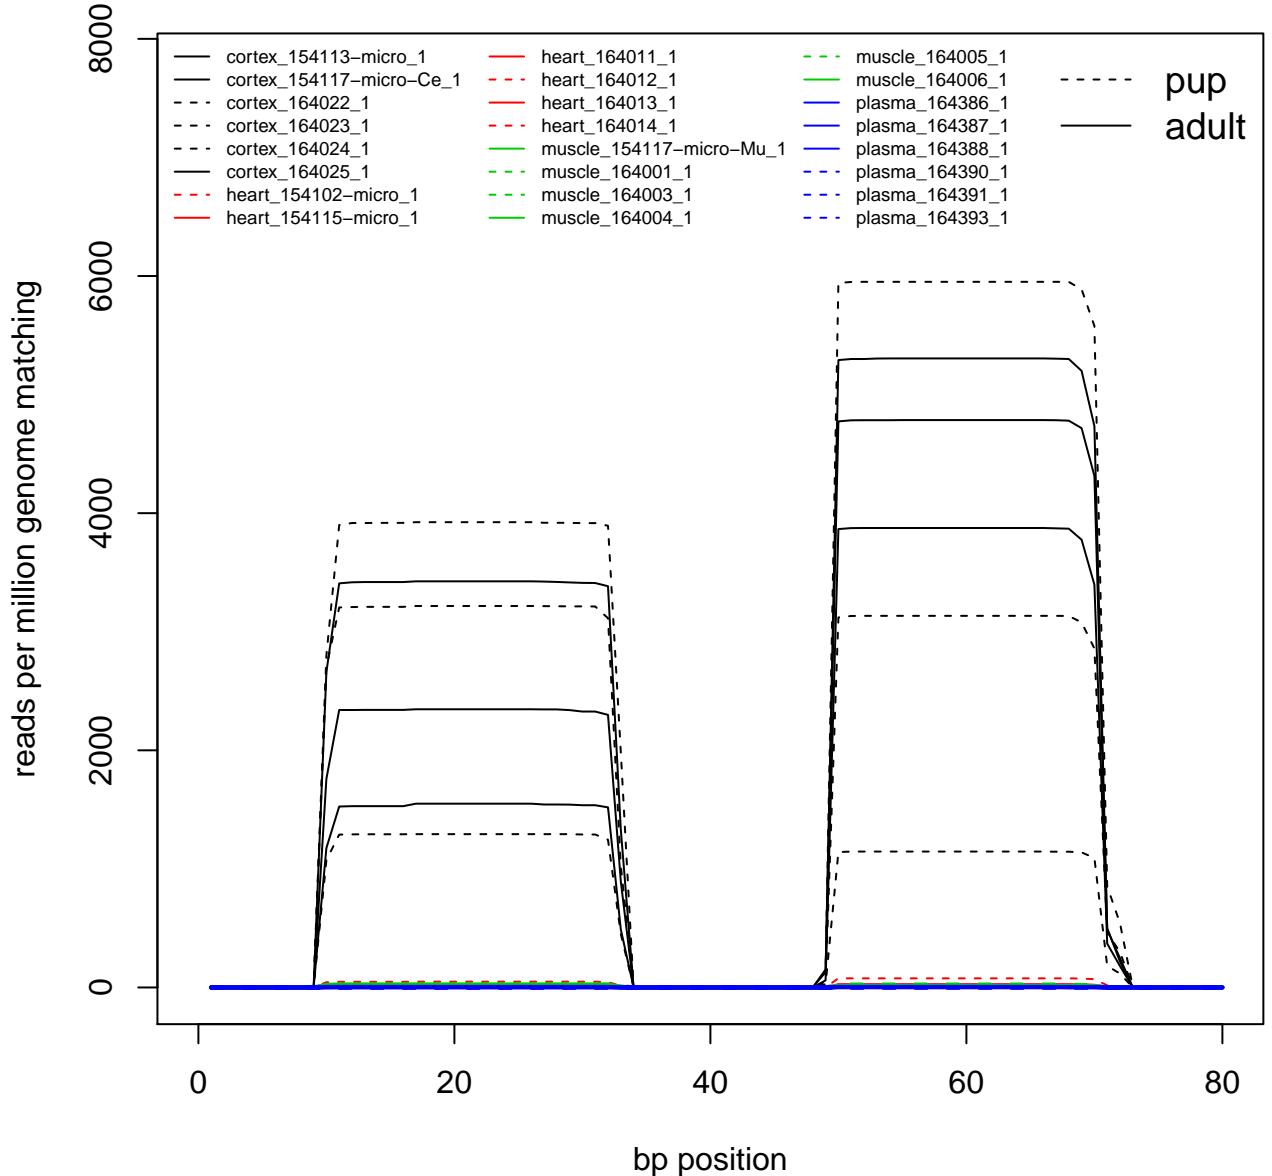

# novel\_74

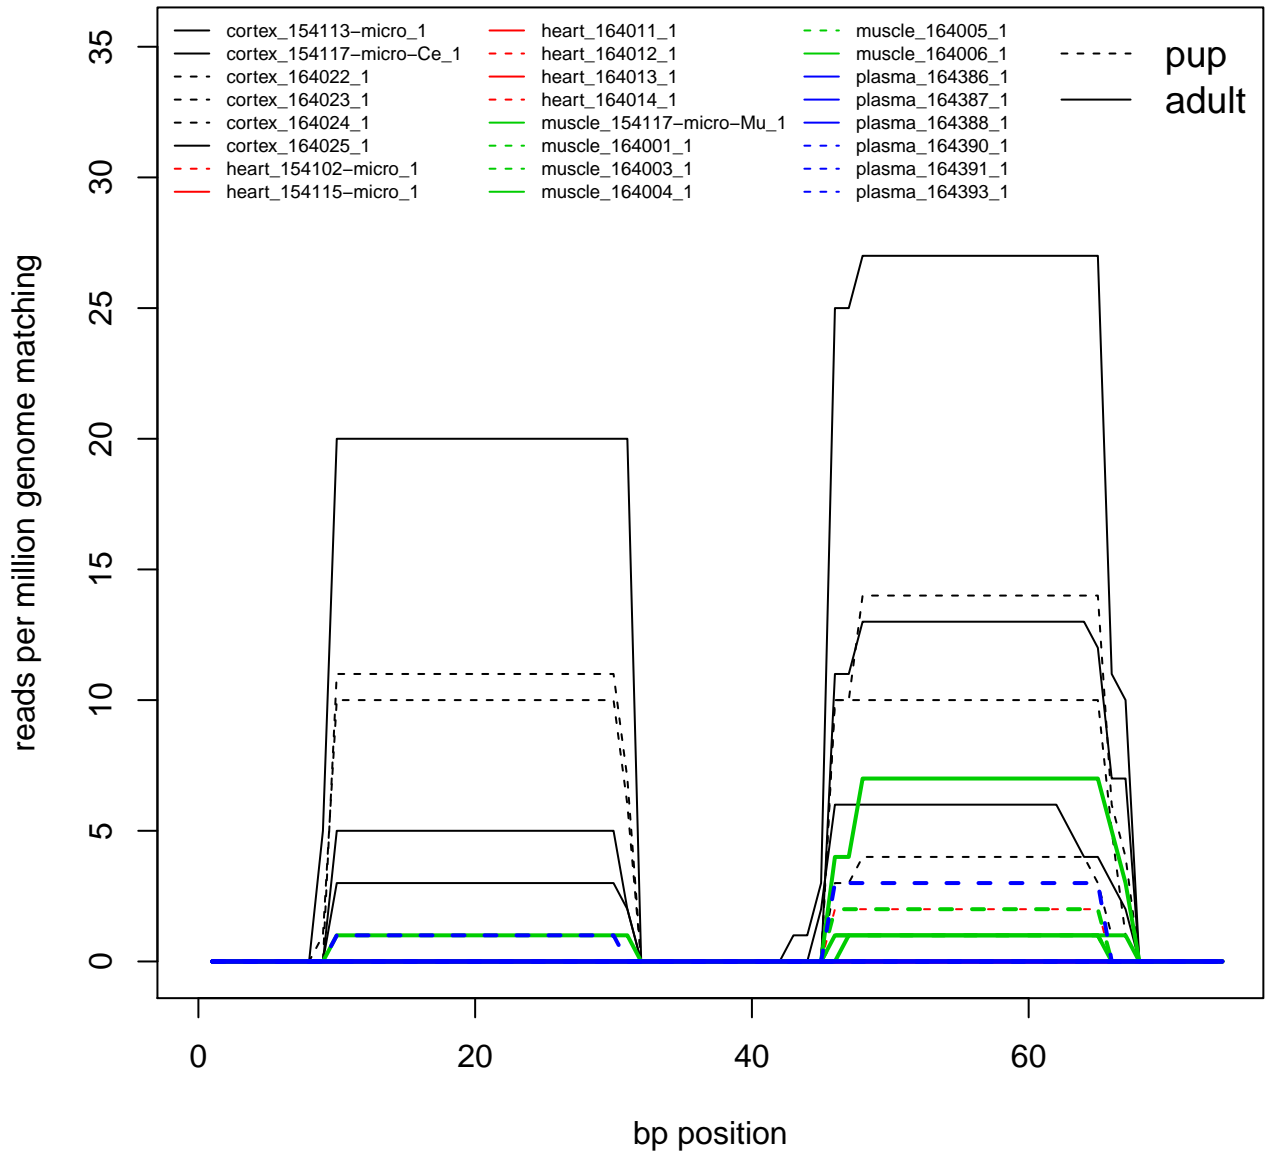





# novel\_75

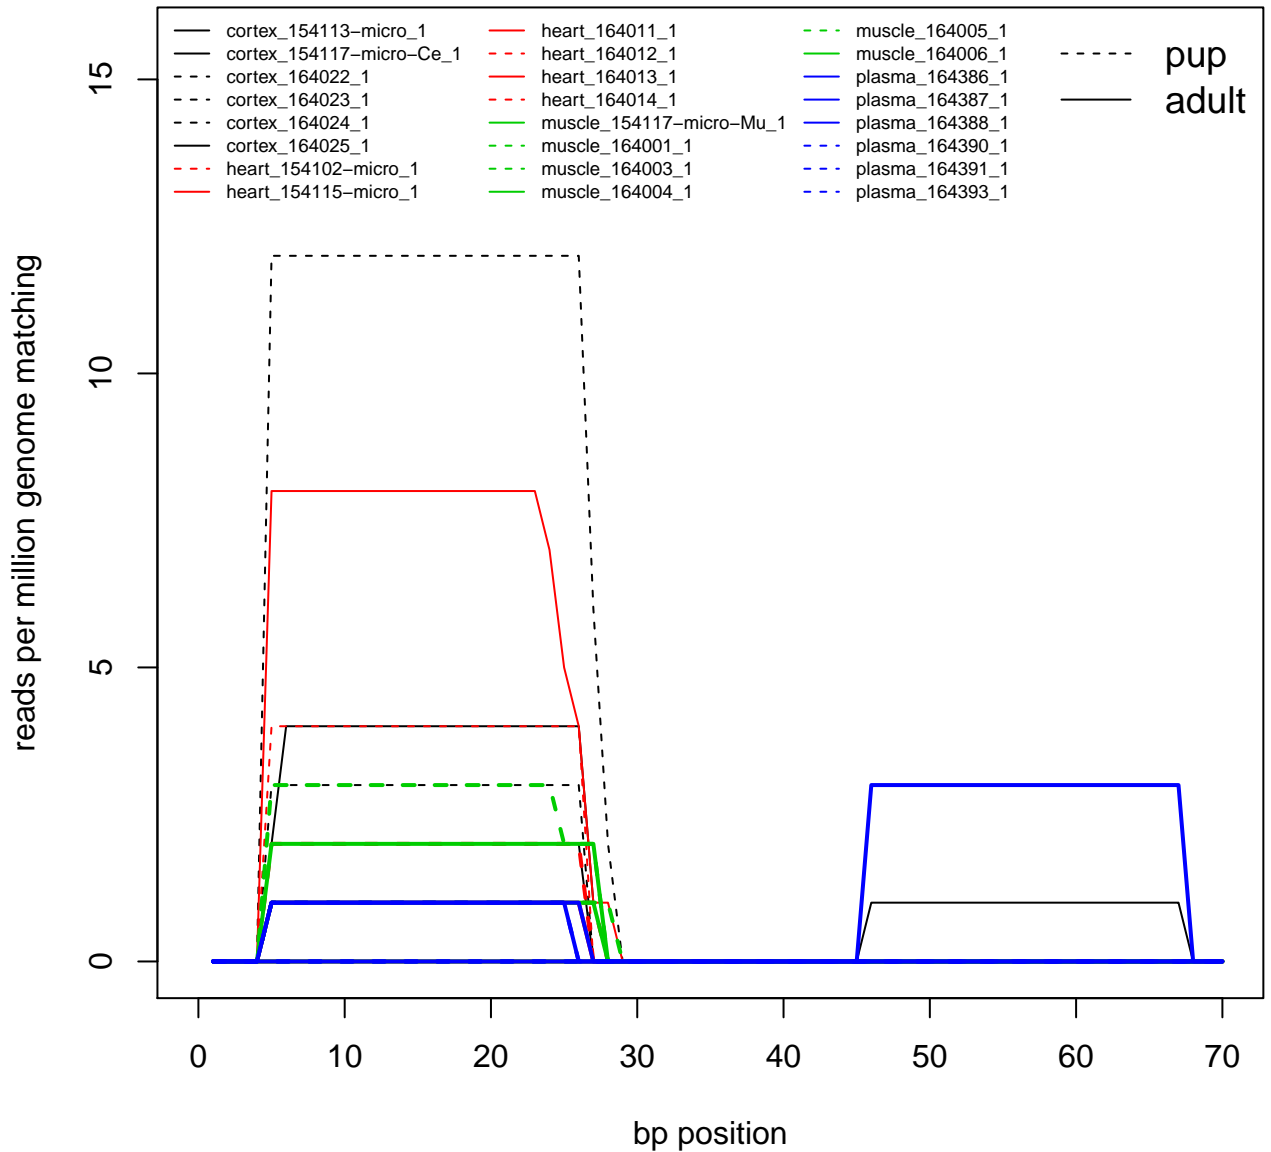



# lwe-miR-199a\_loc3

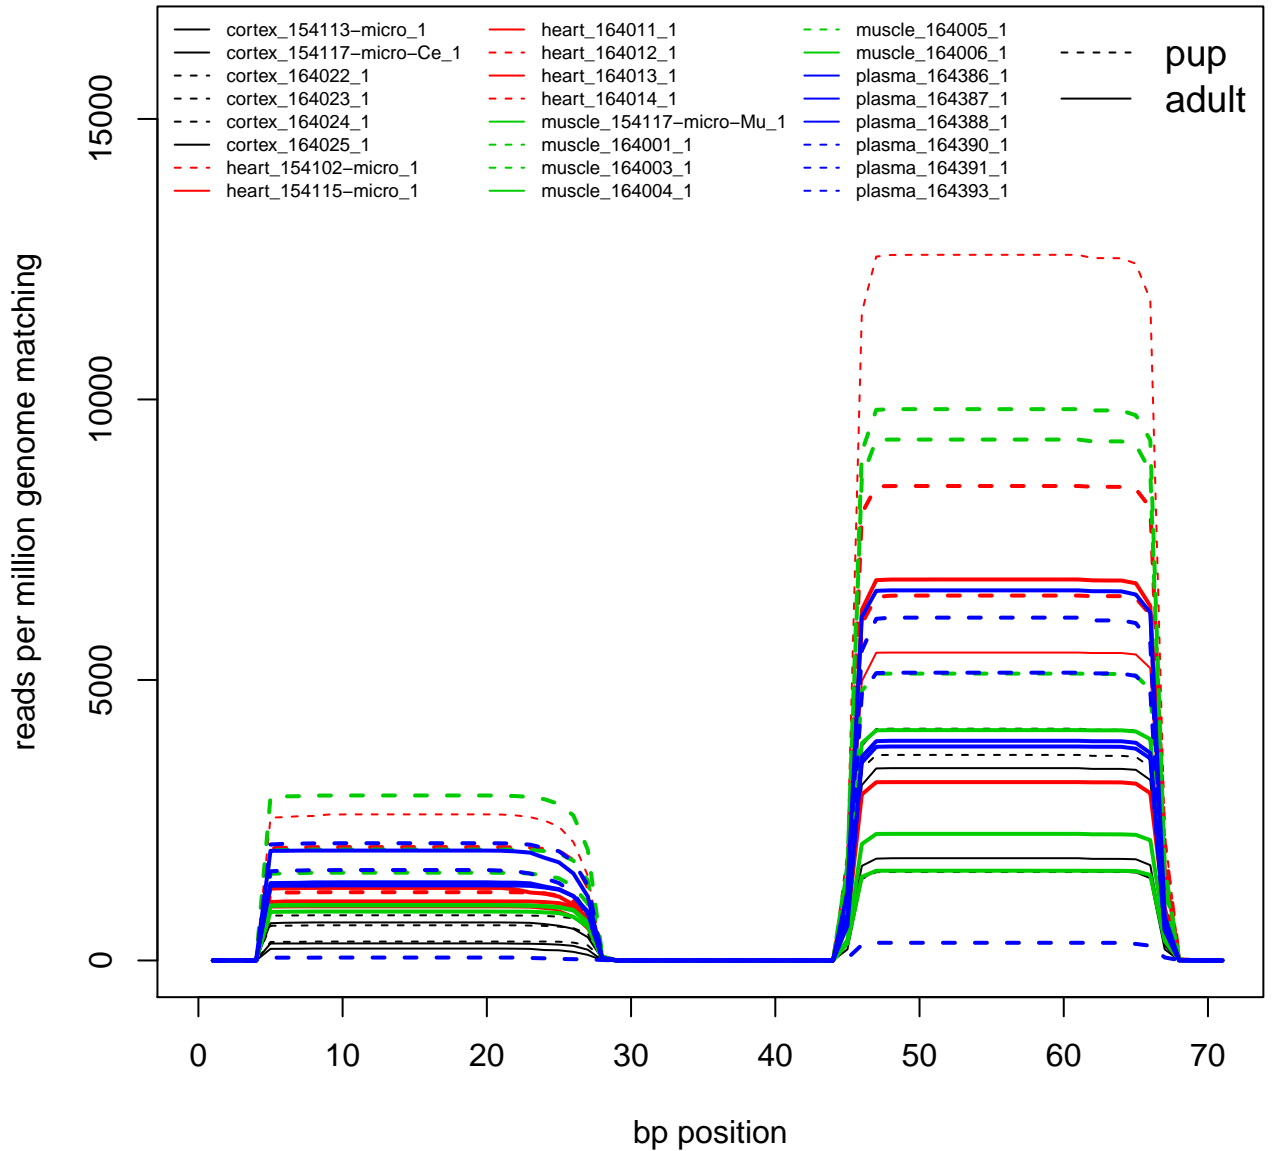

# lwe-miR-26a\_loc1

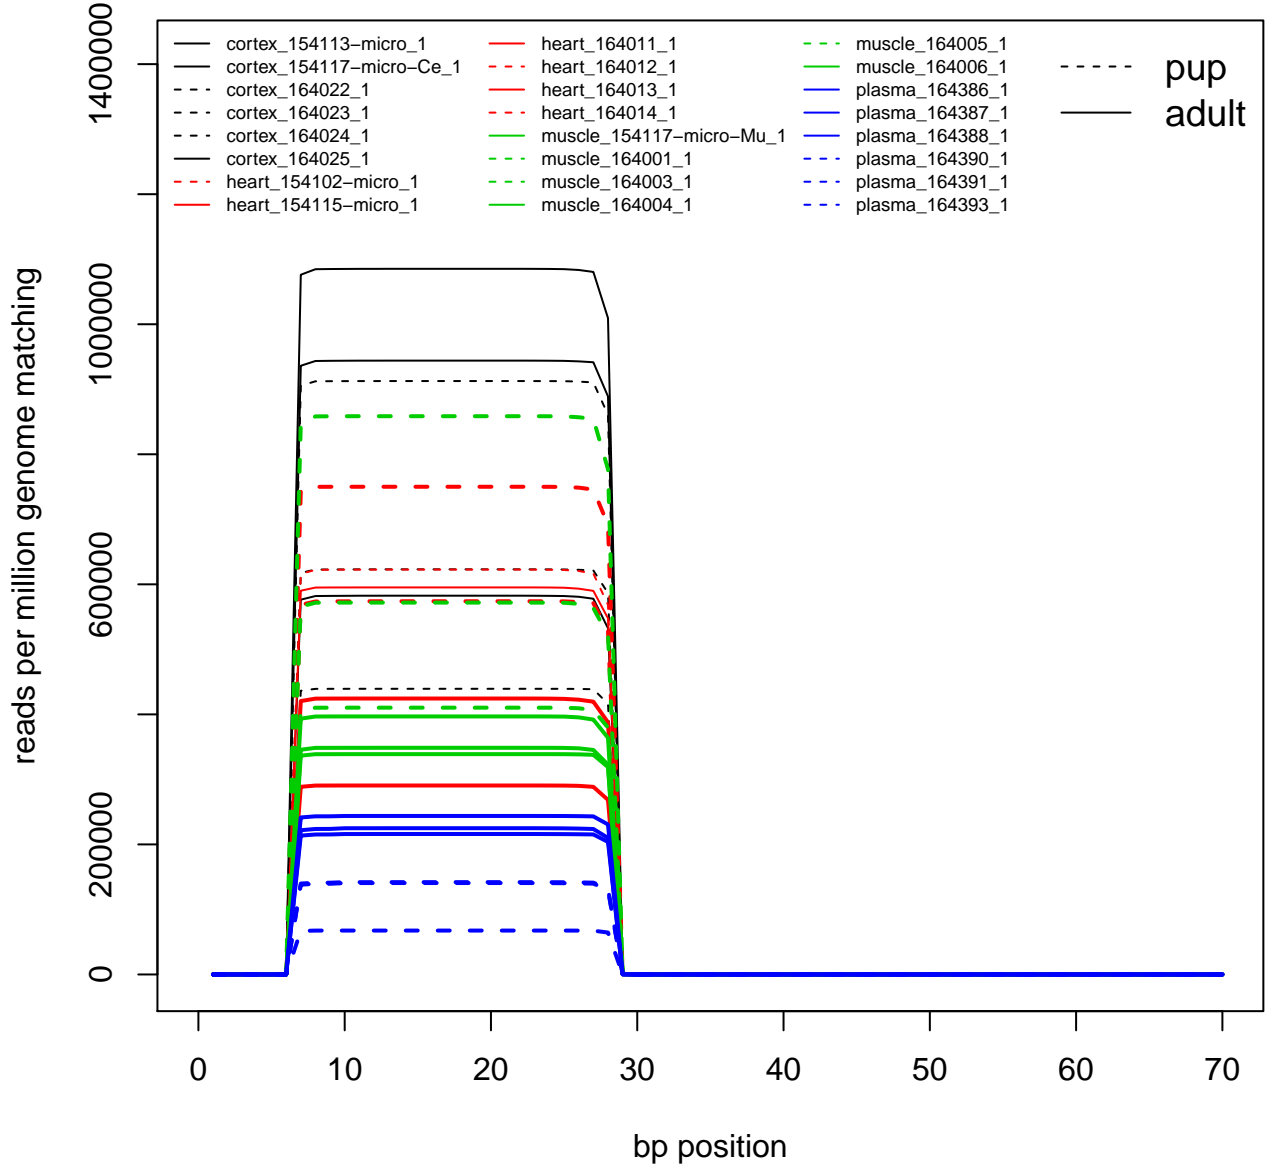

# novel\_76

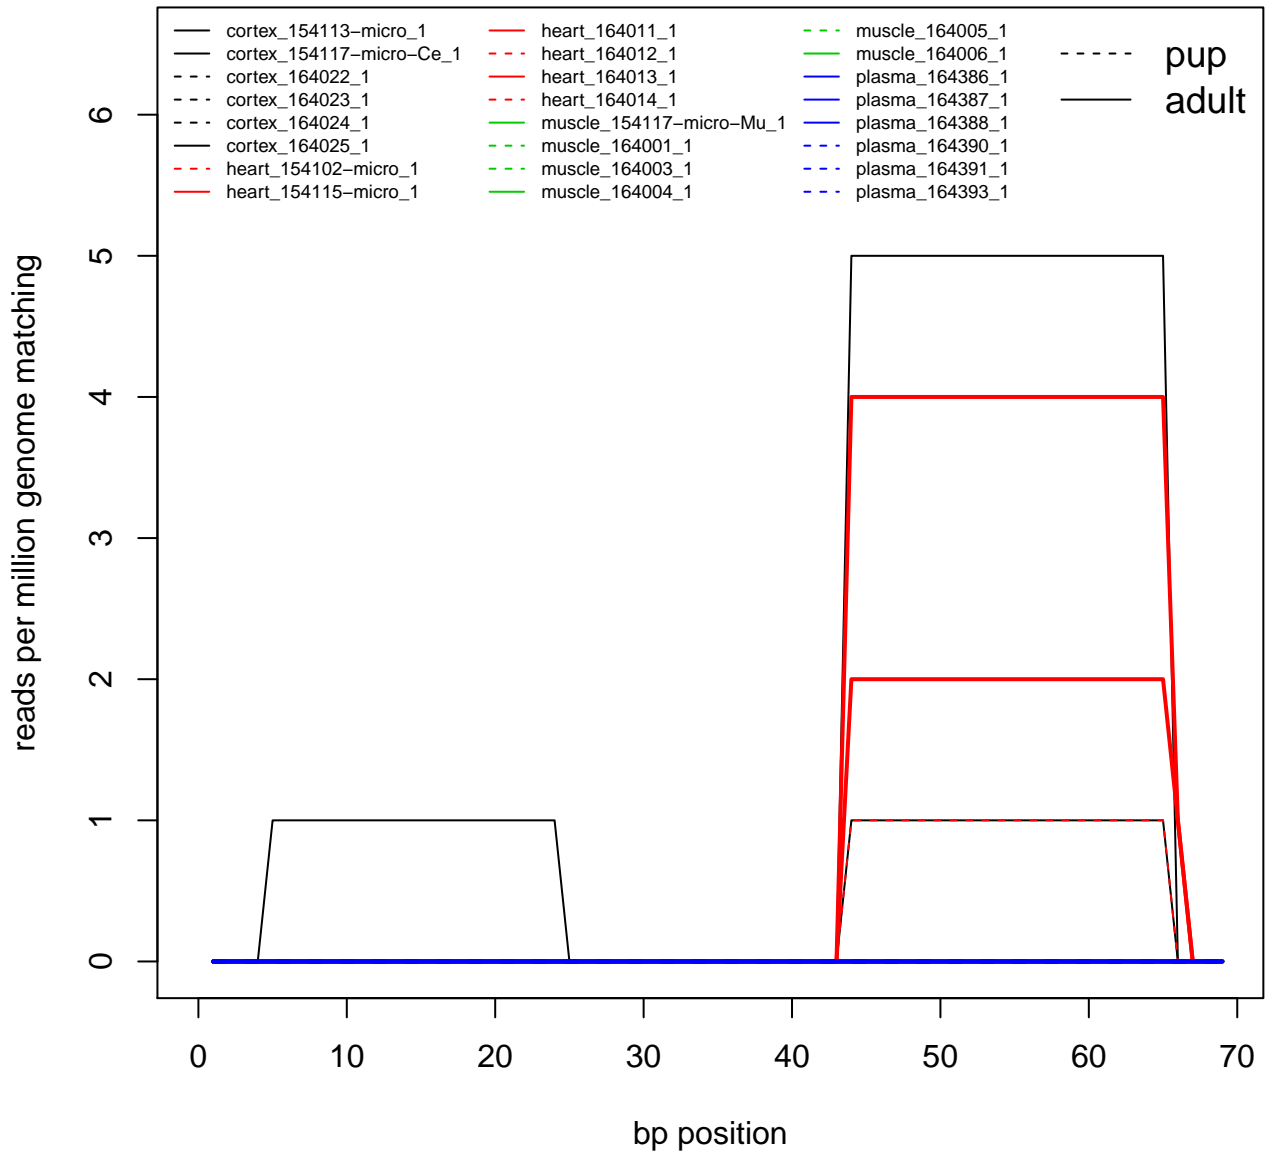

# novel\_77

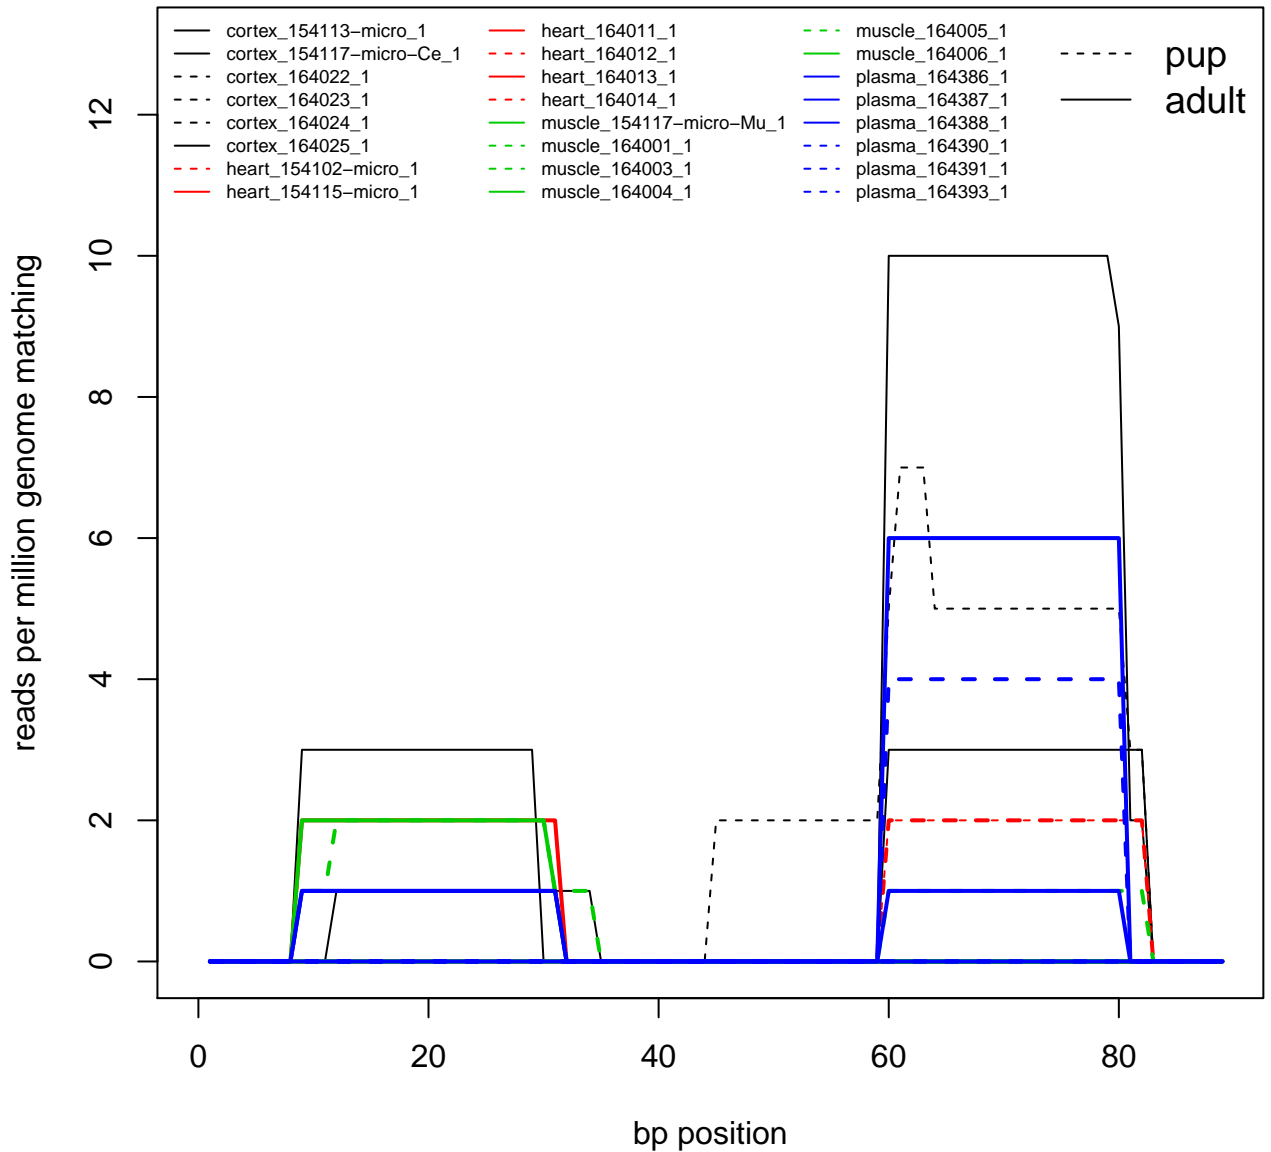





# lwe-miR-345\_loc1

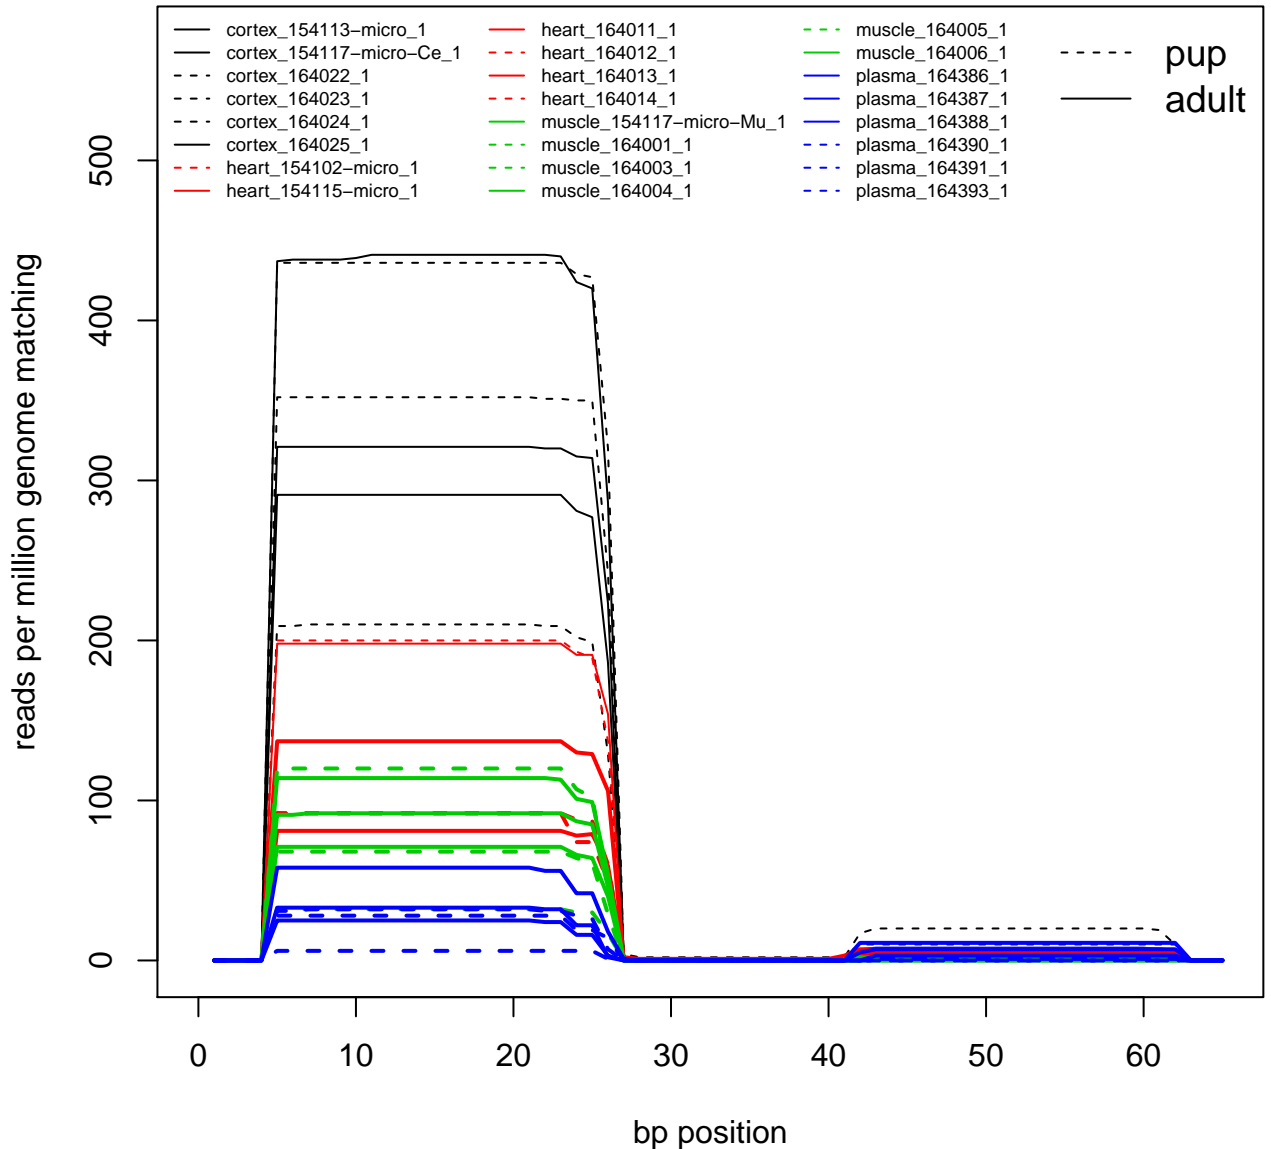

# novel\_79

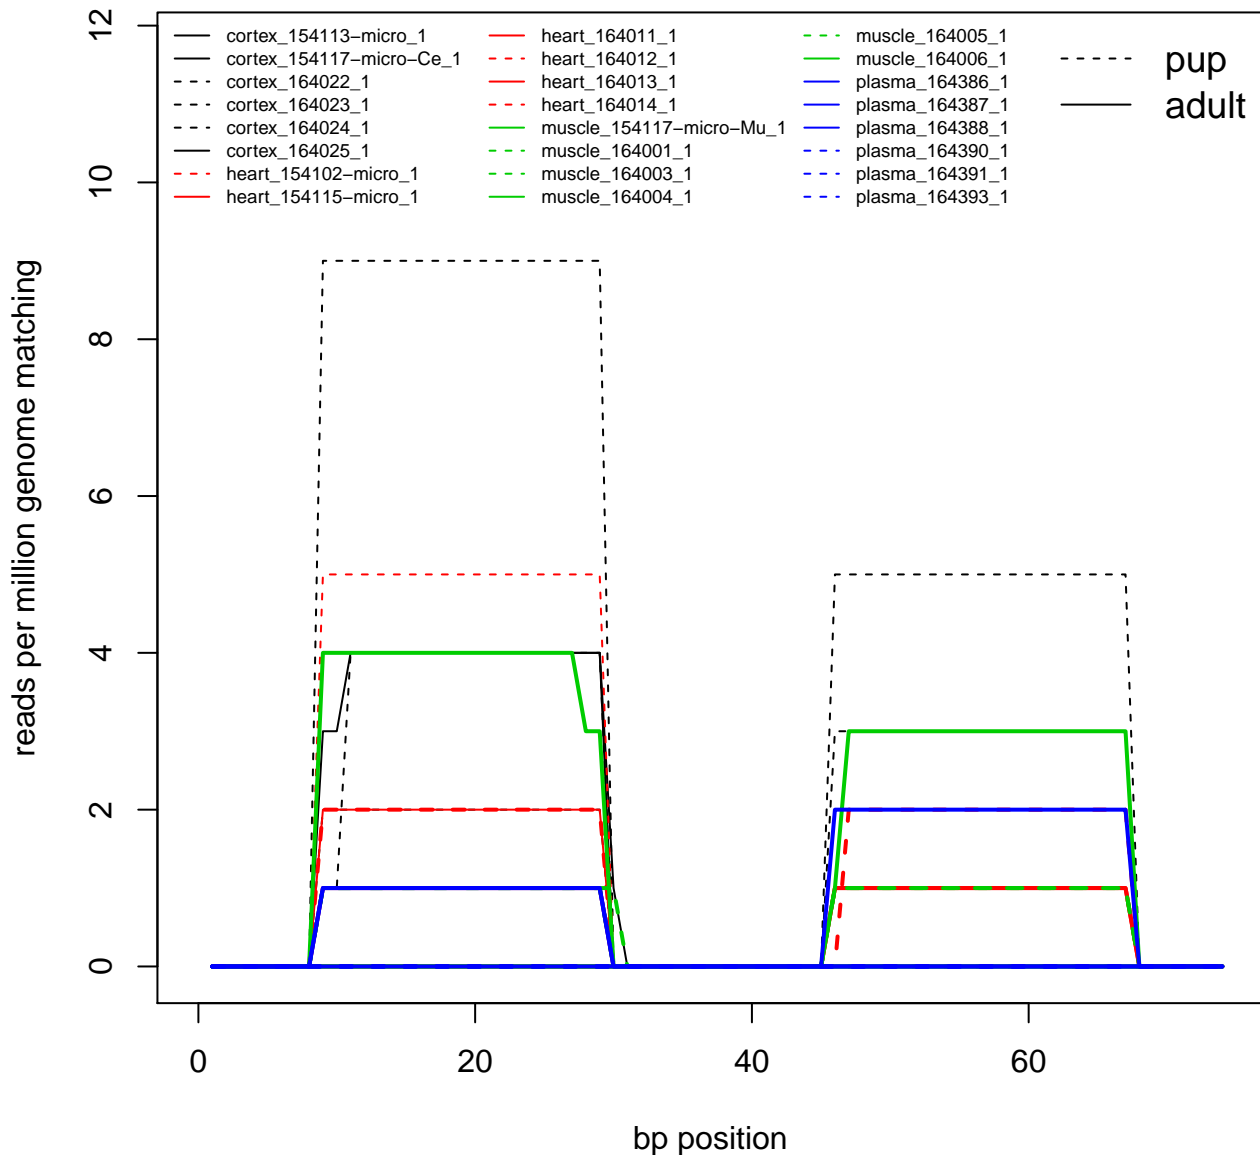

# lwe-miR-22\_loc1

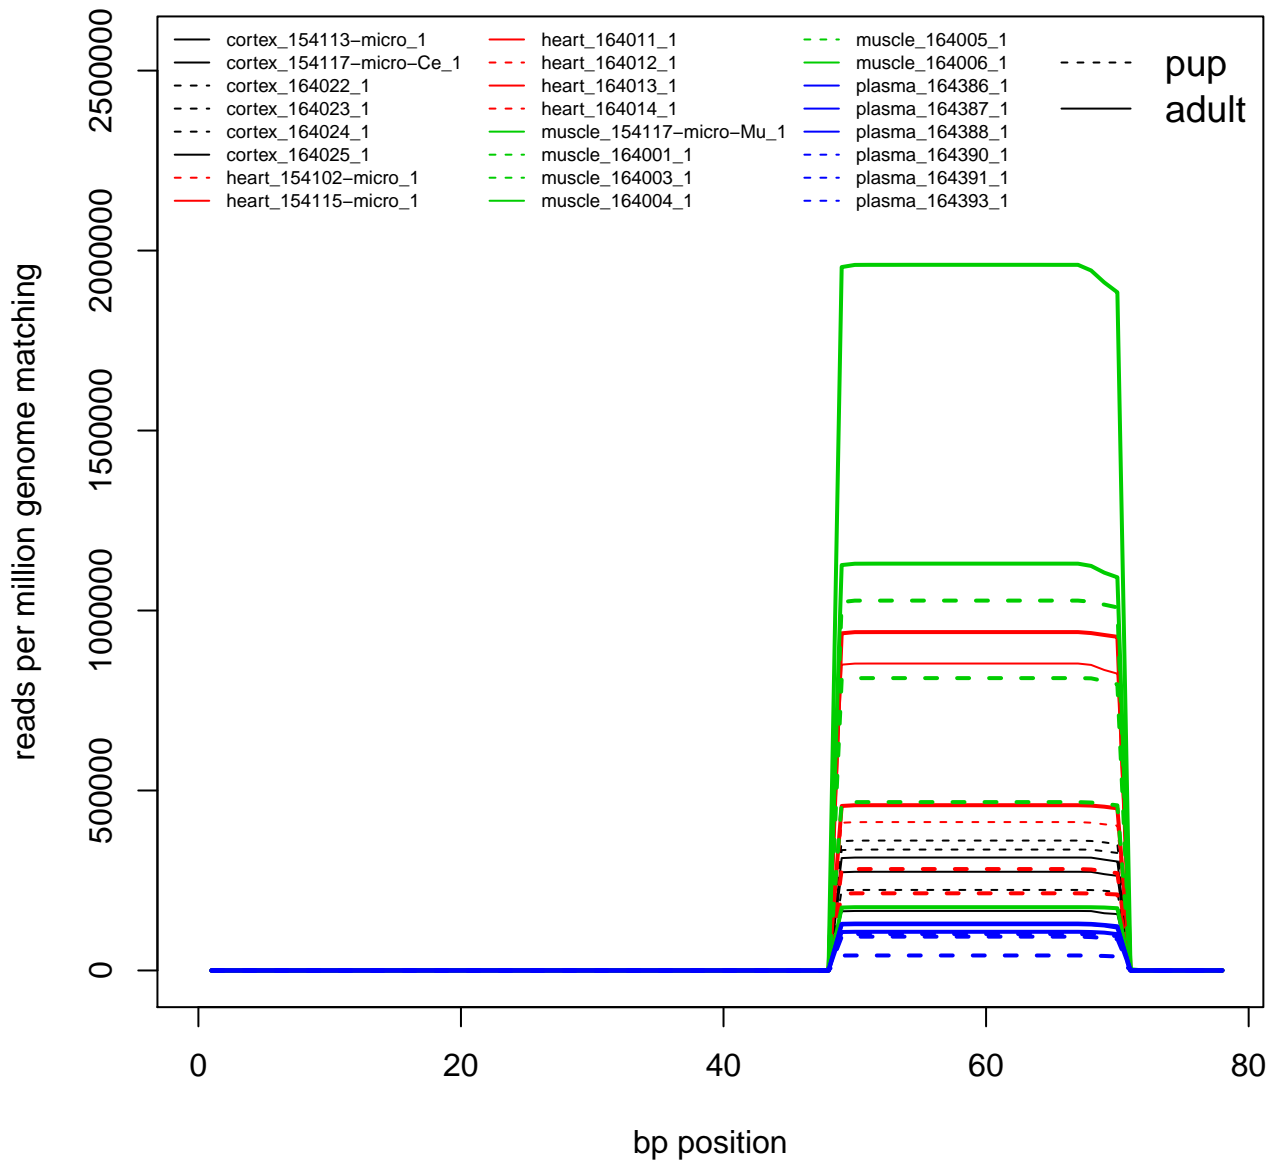

# lwe-miR-346\_loc1

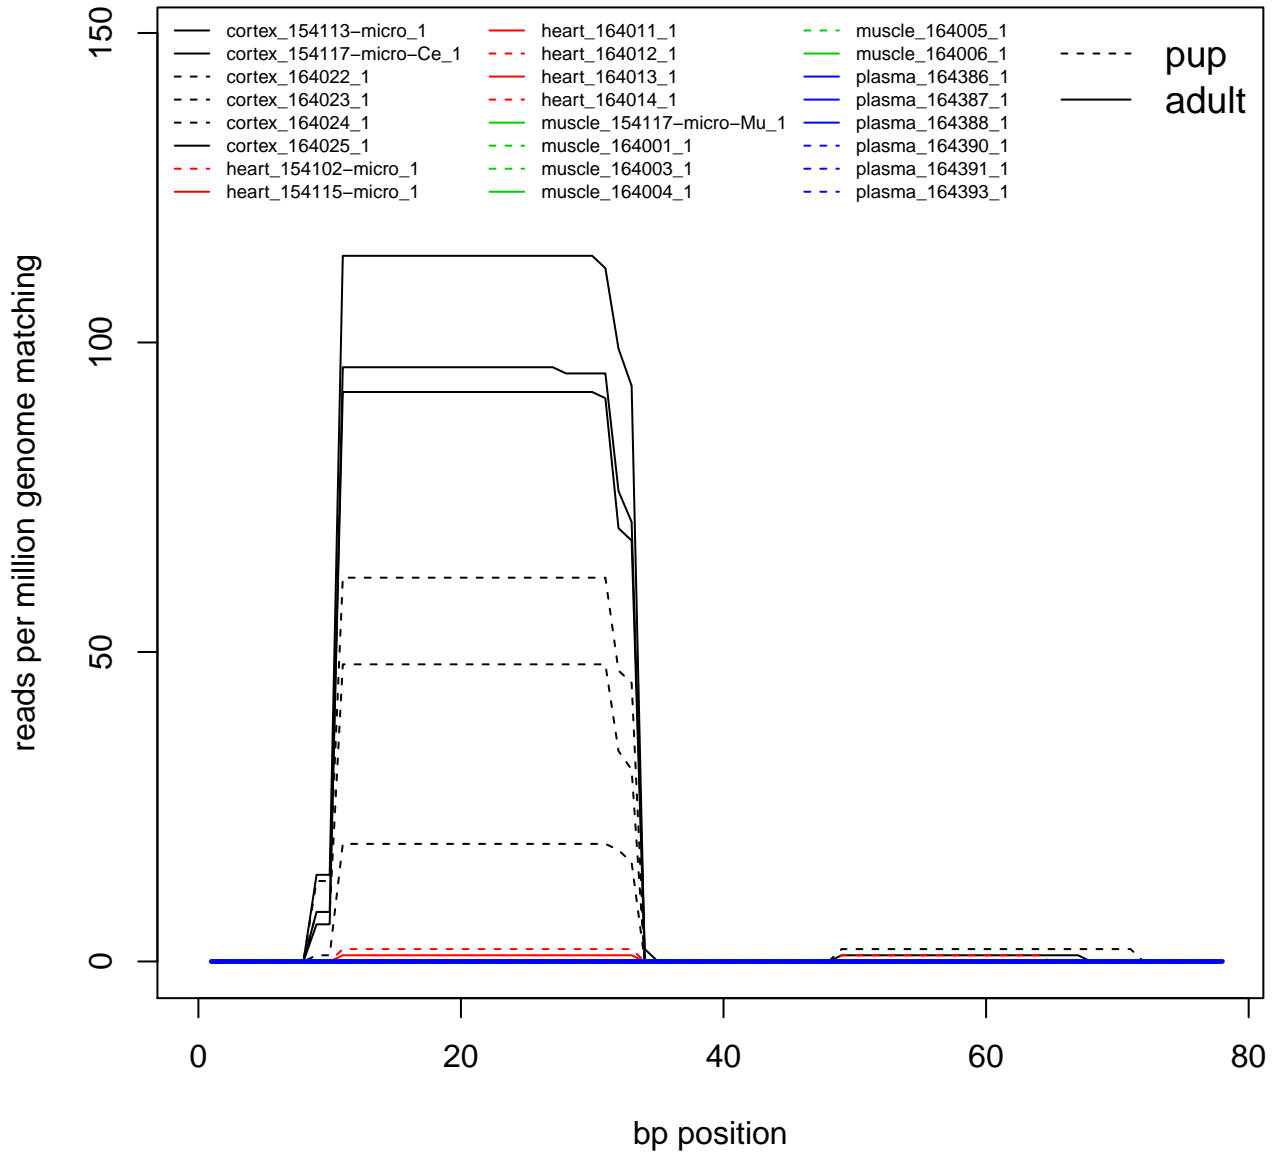

# novel\_80

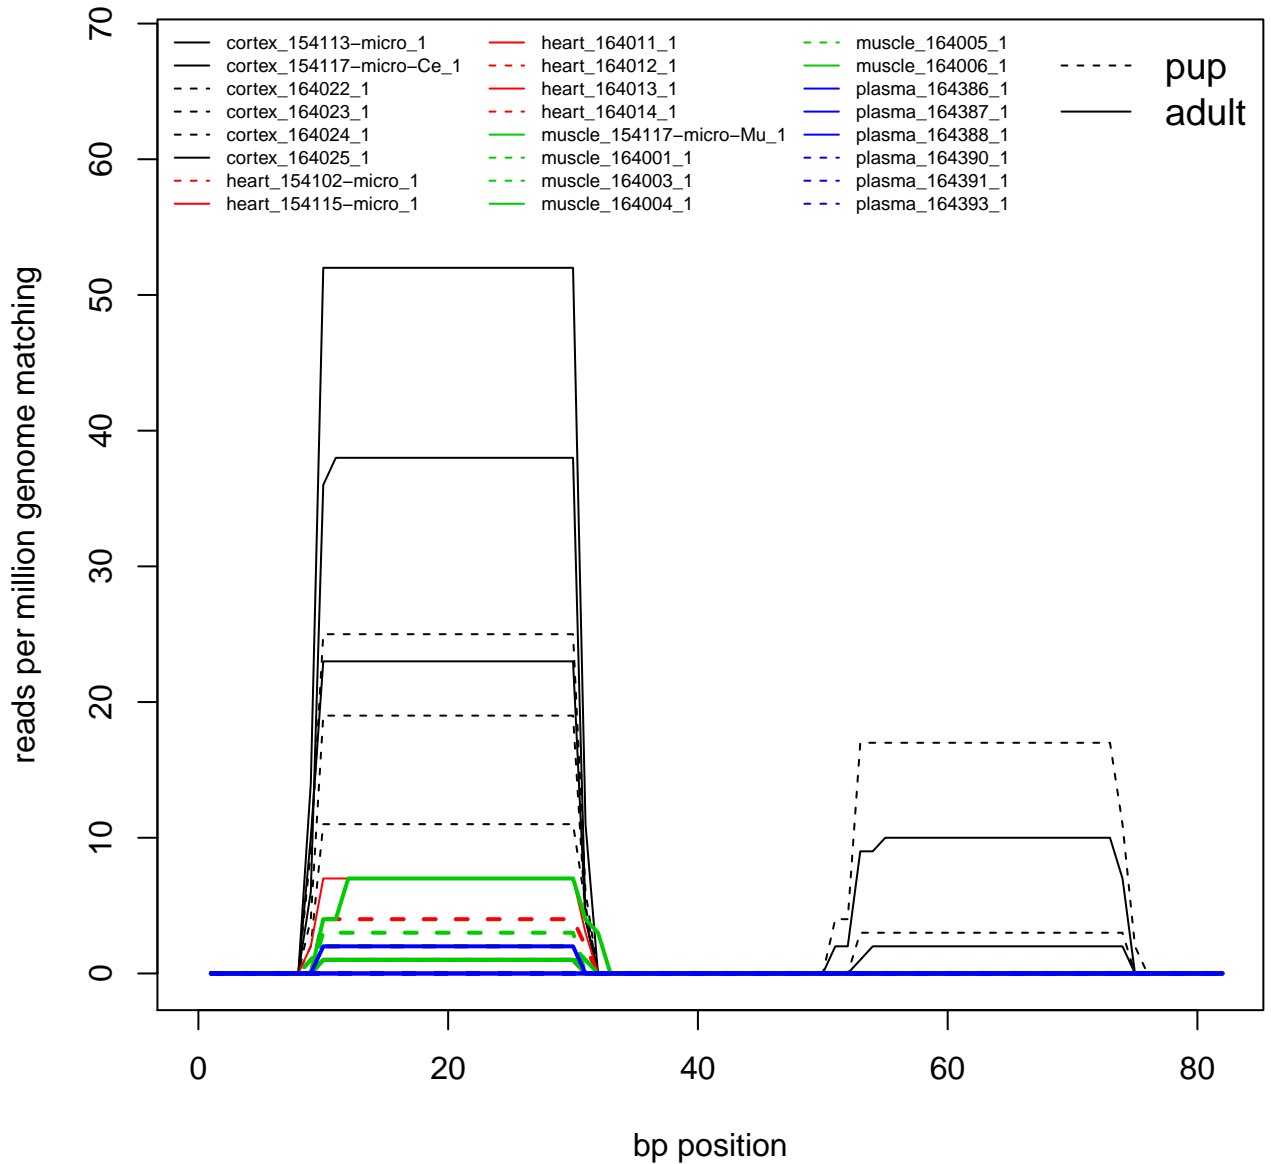

# lwe-miR-328\_loc1

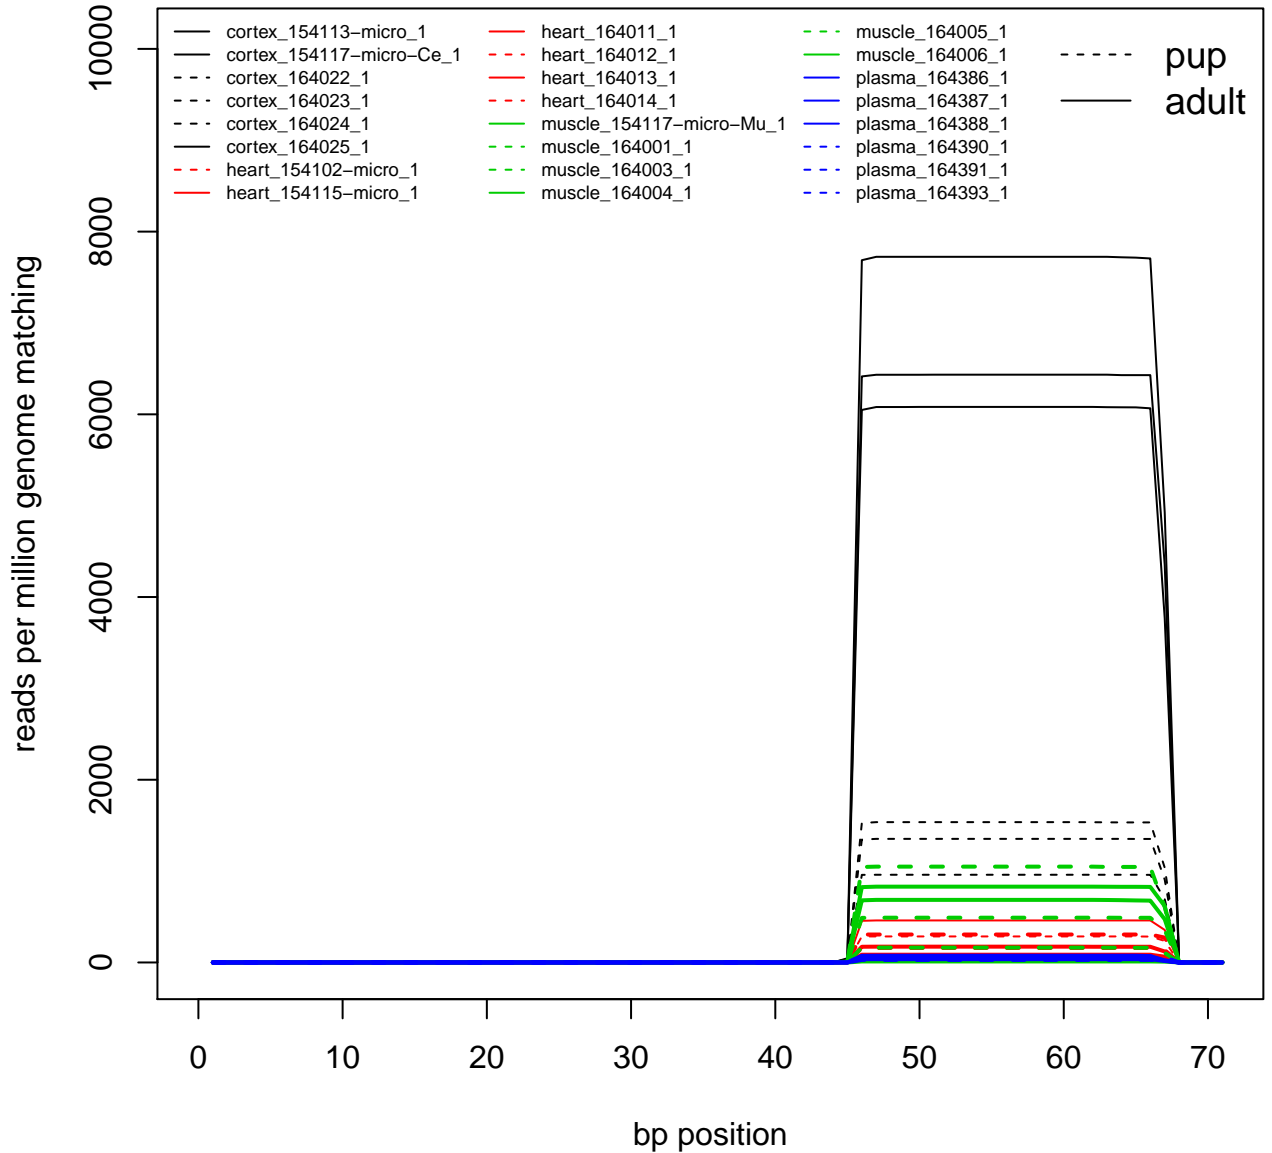

# lwe-miR-574\_loc1

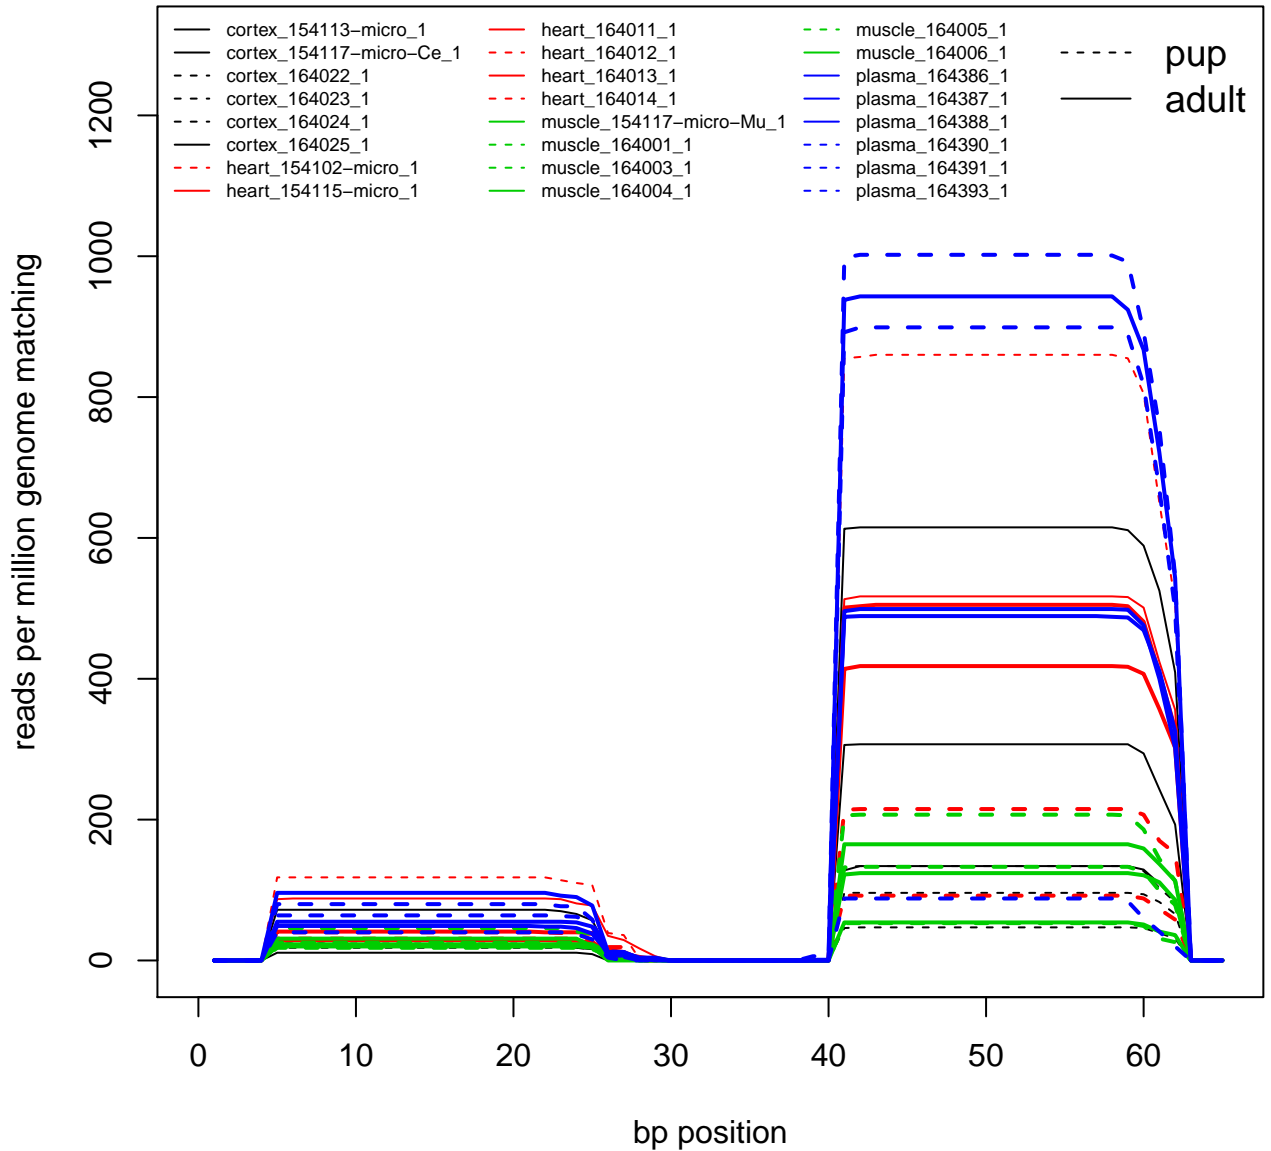

# lwe-miR-210\_loc1

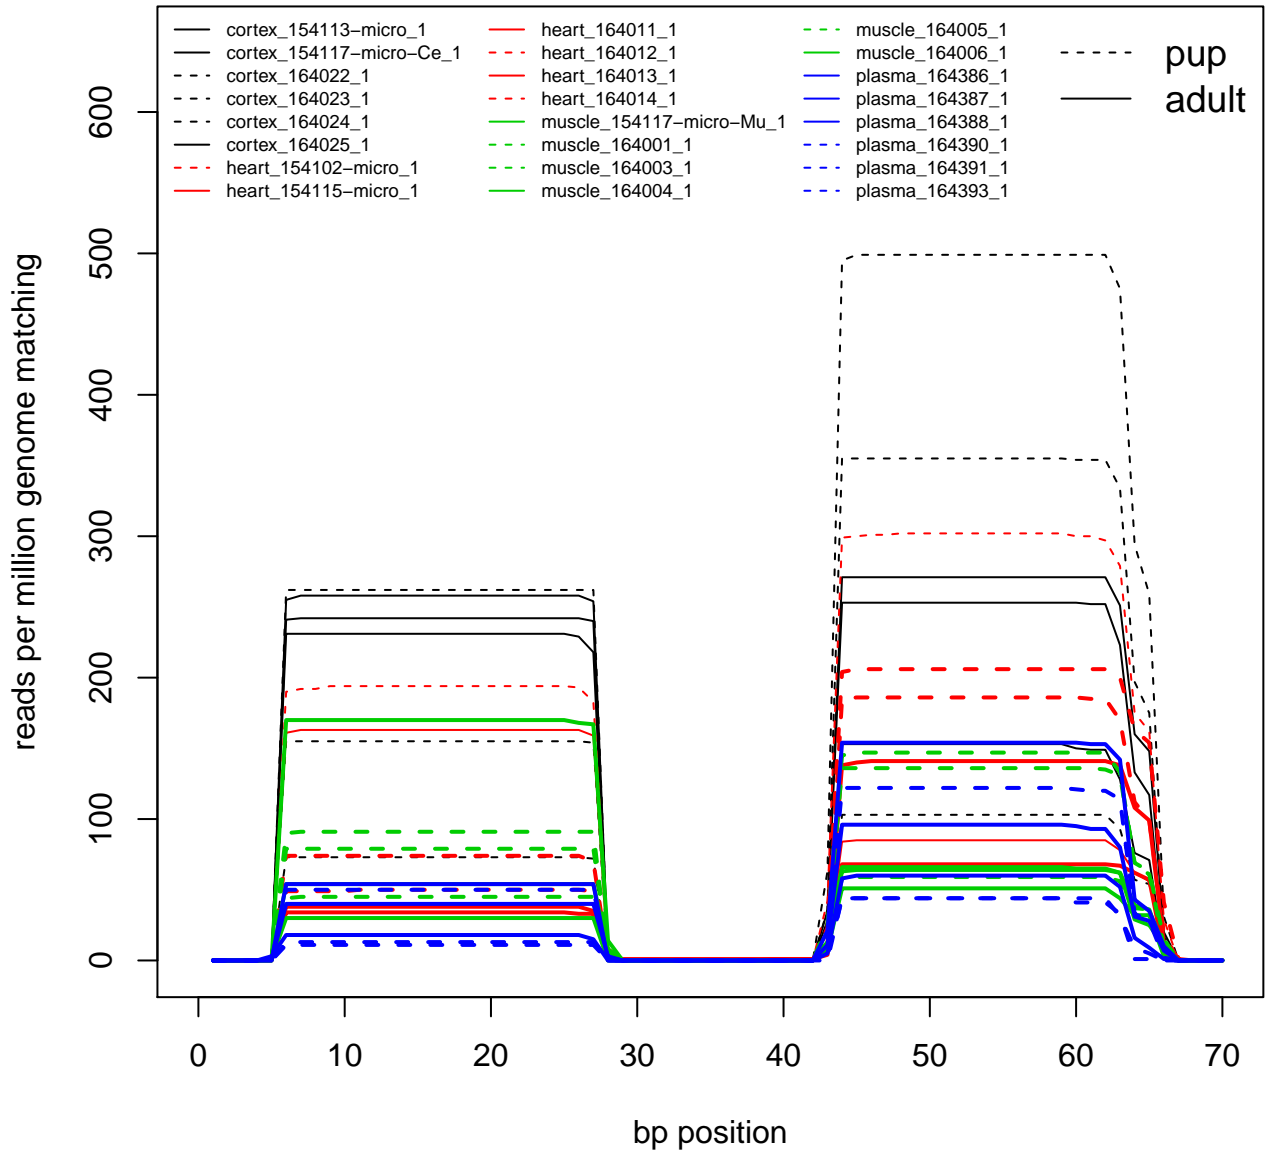



# lwe-miR-331\_loc1

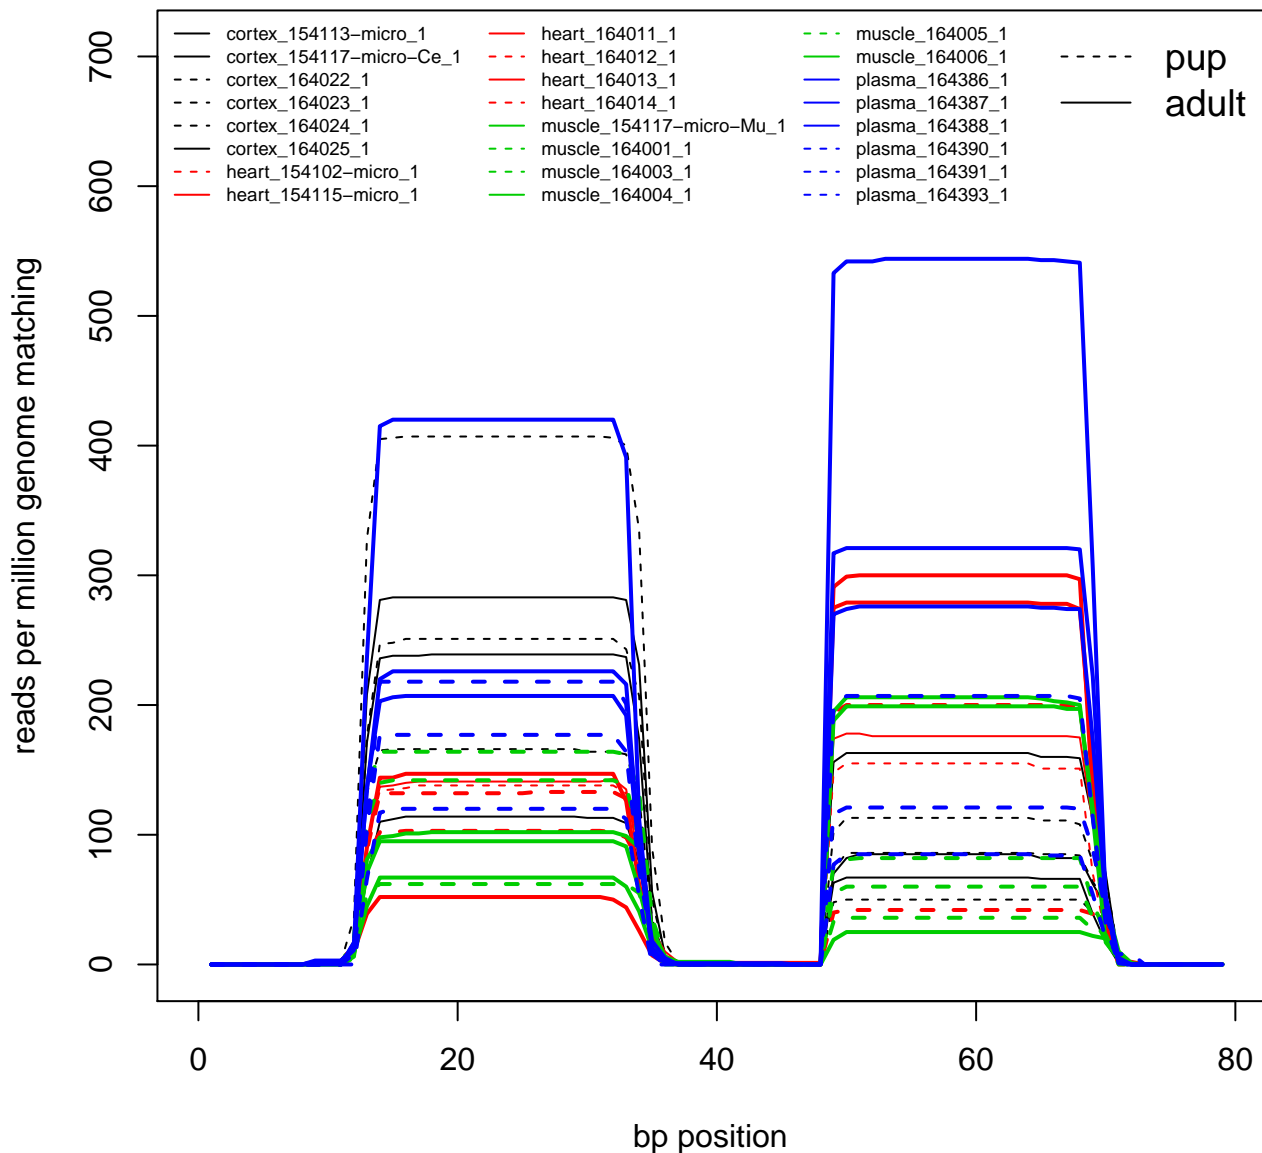

# novel\_81

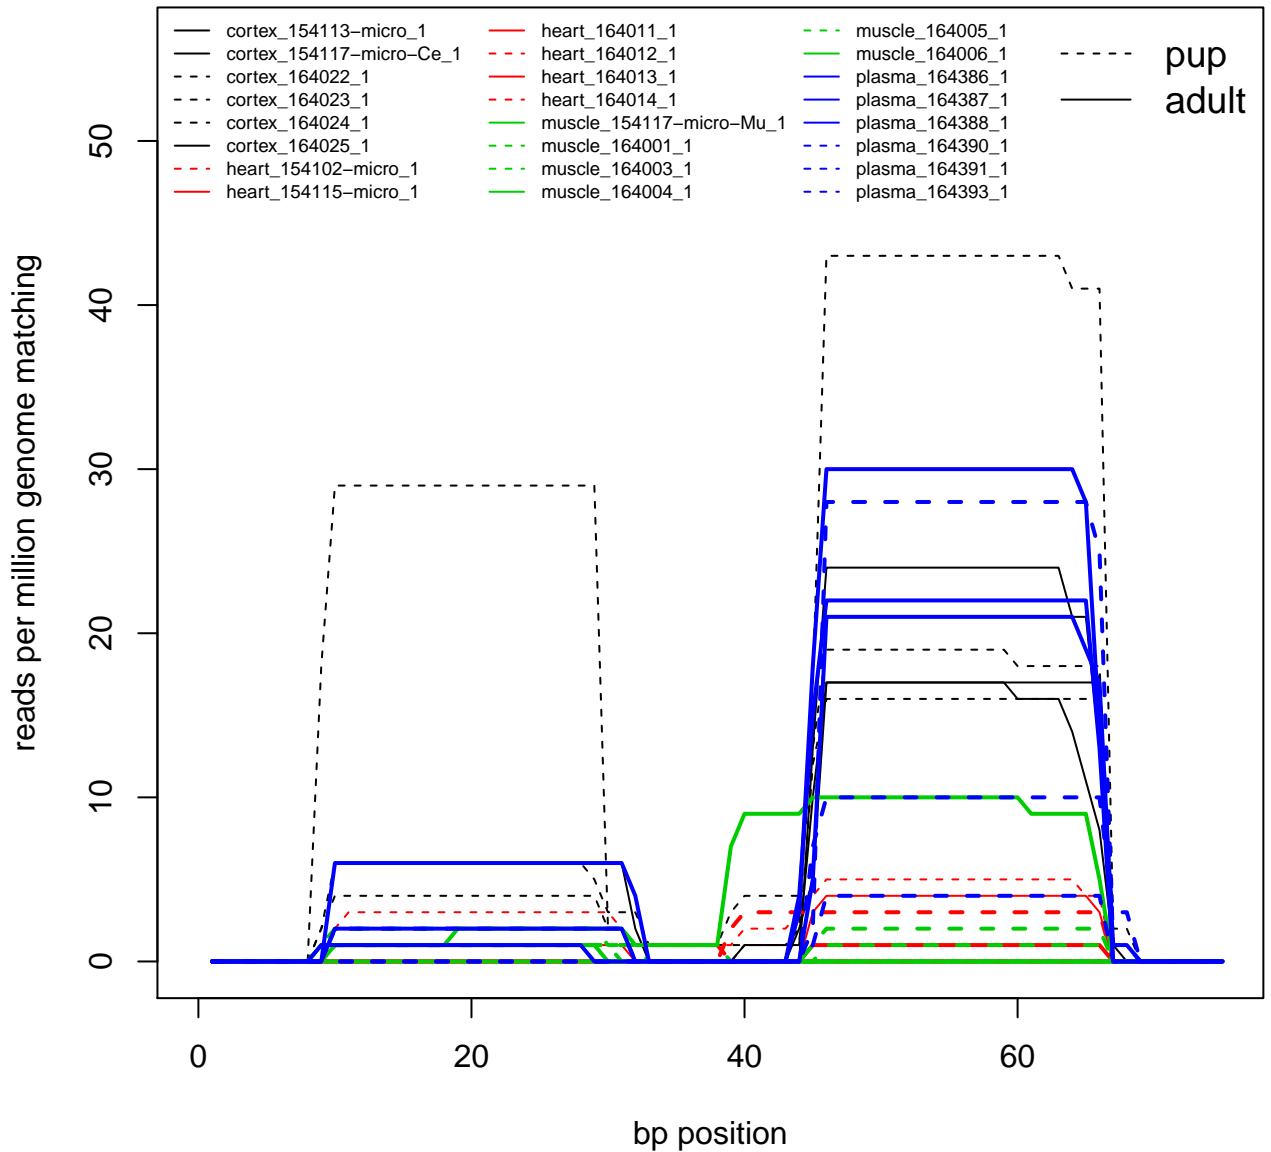

# lwe-miR-190a\_loc1

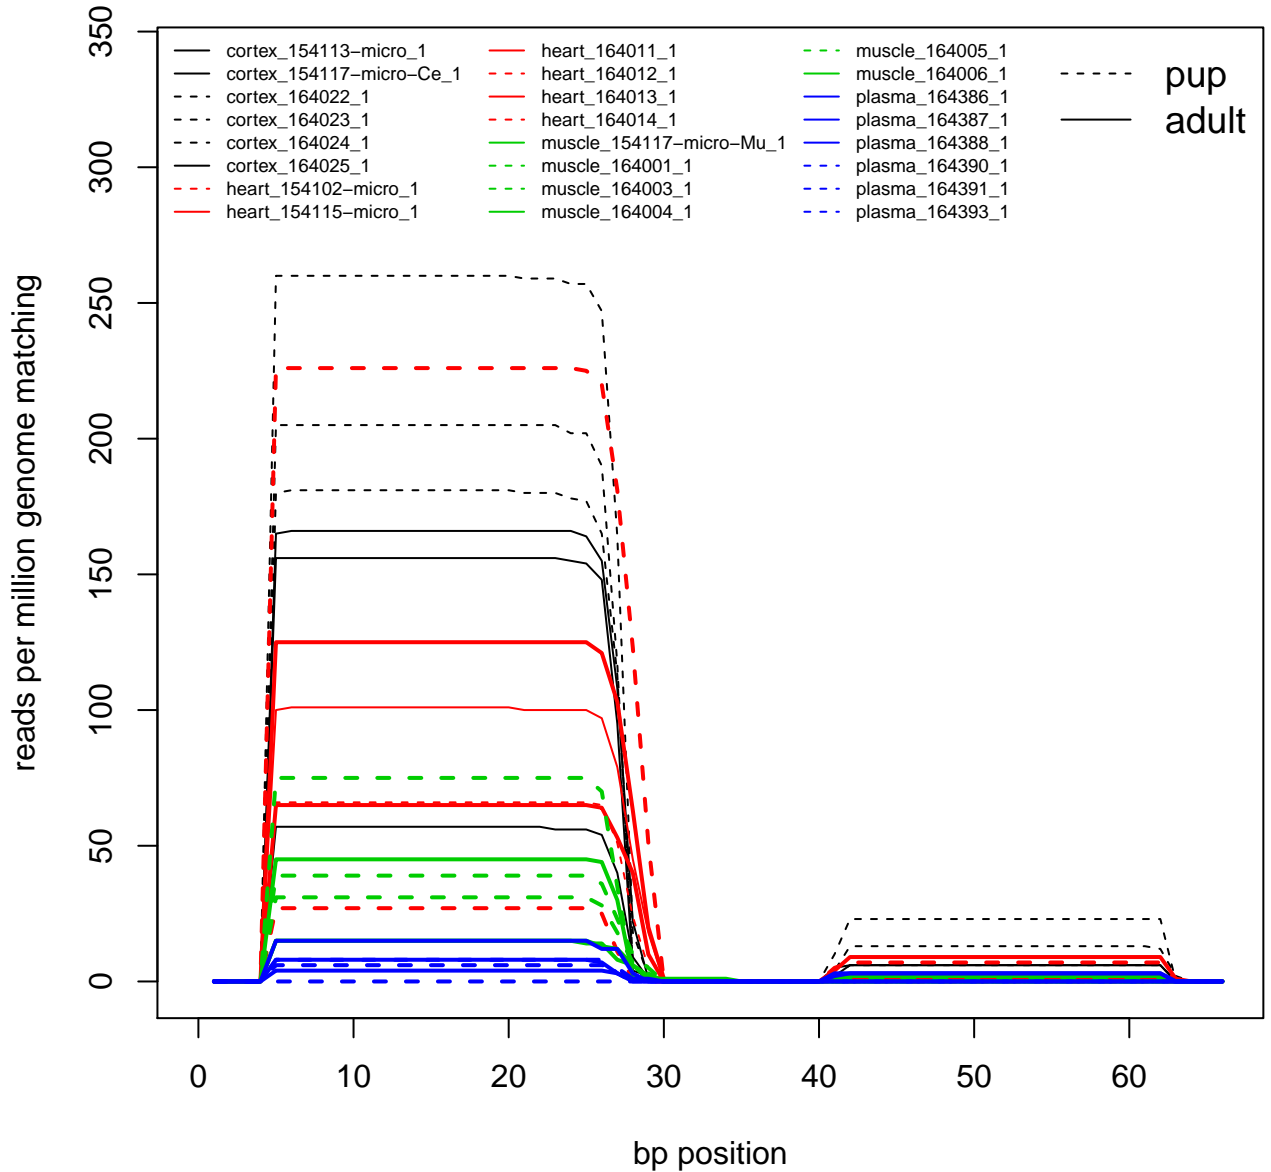

# lwe-miR-15b\_loc1

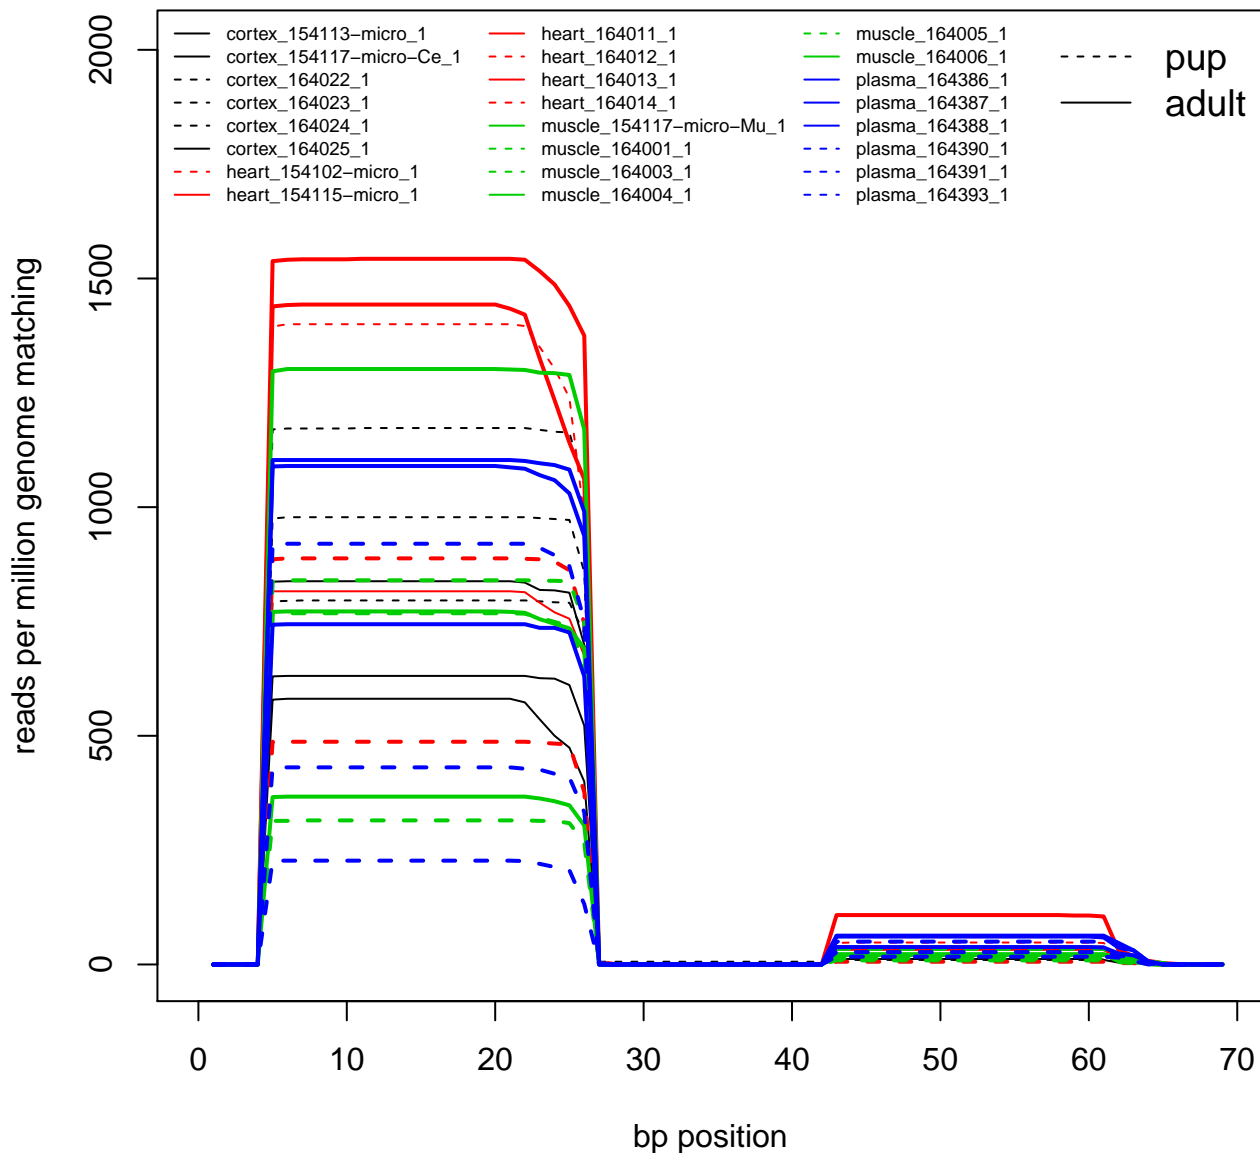

# lwe-miR-16\_loc2

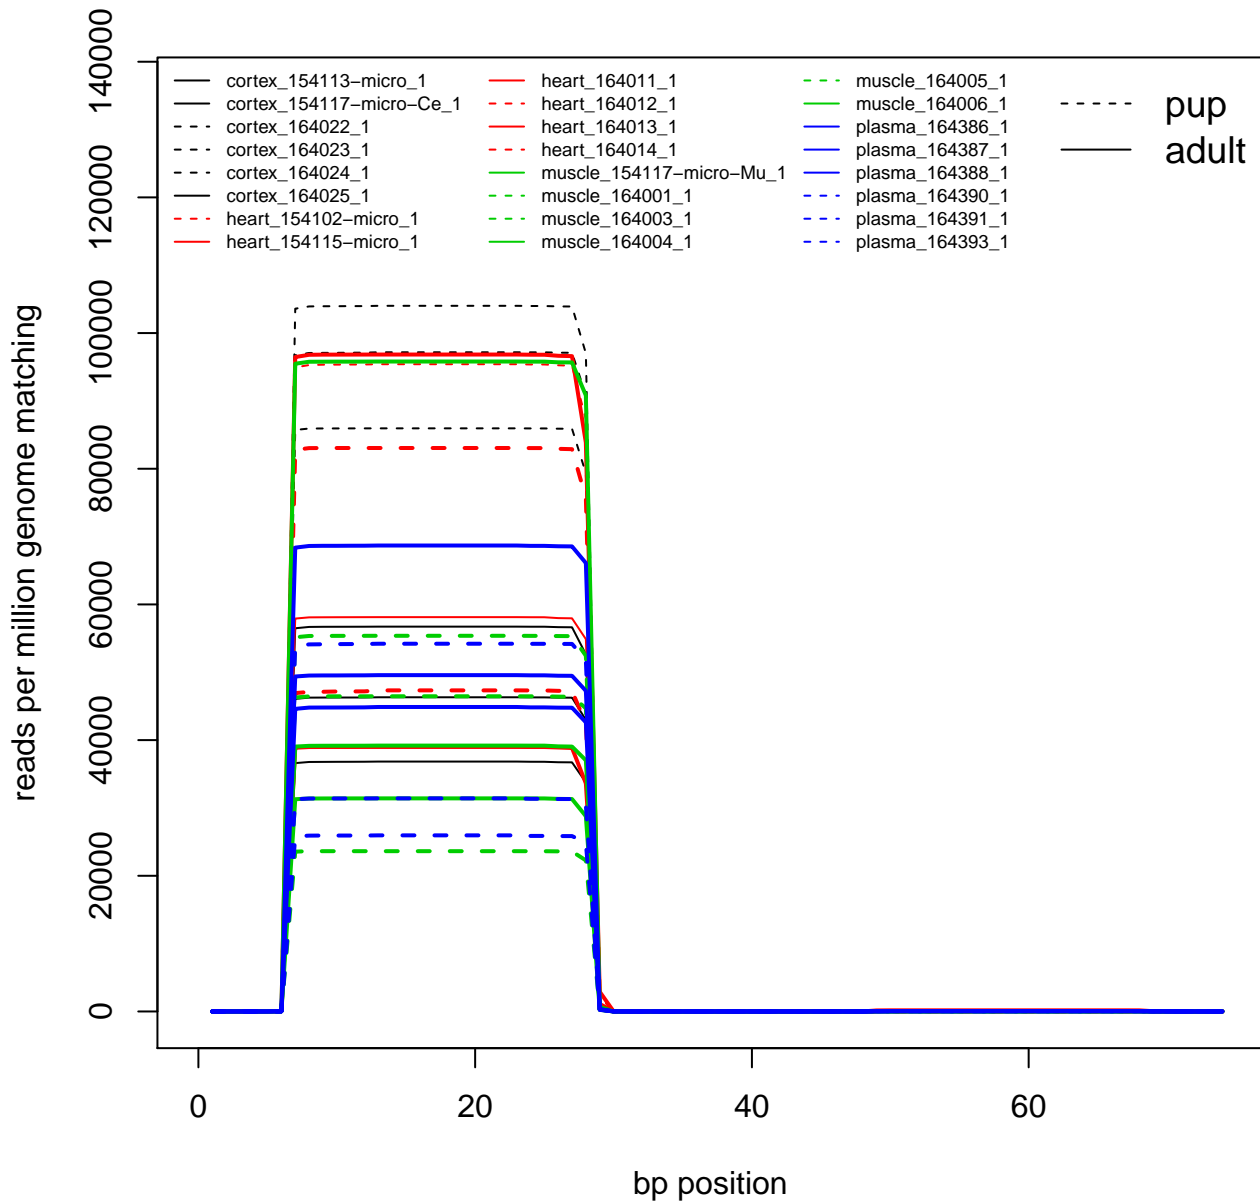

# novel\_82

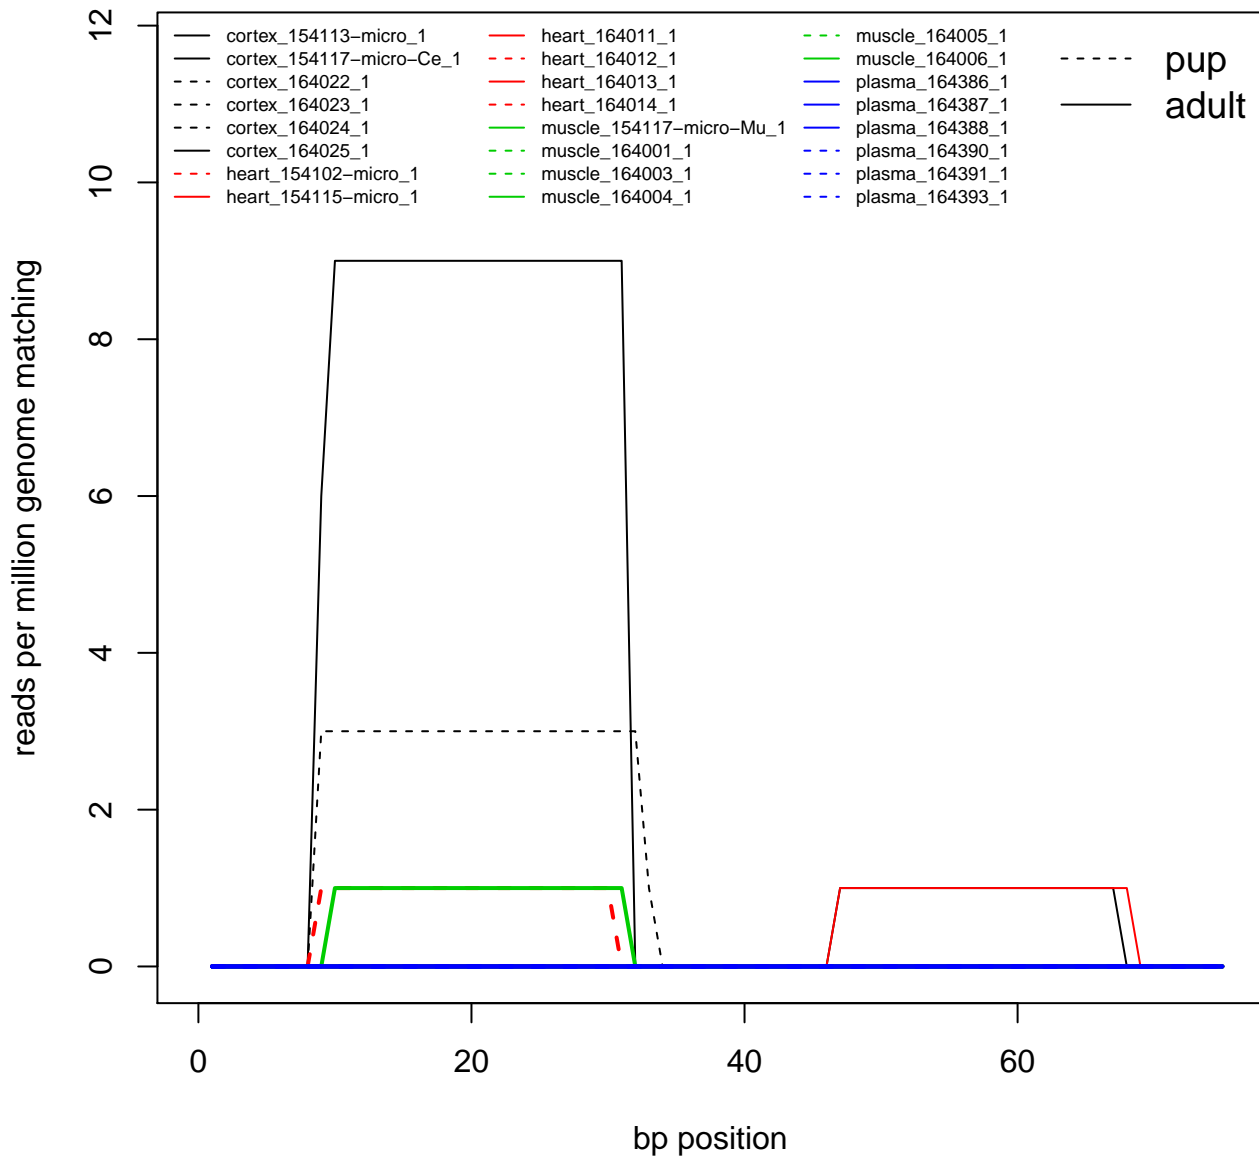







# lwe-miR-140\_loc1

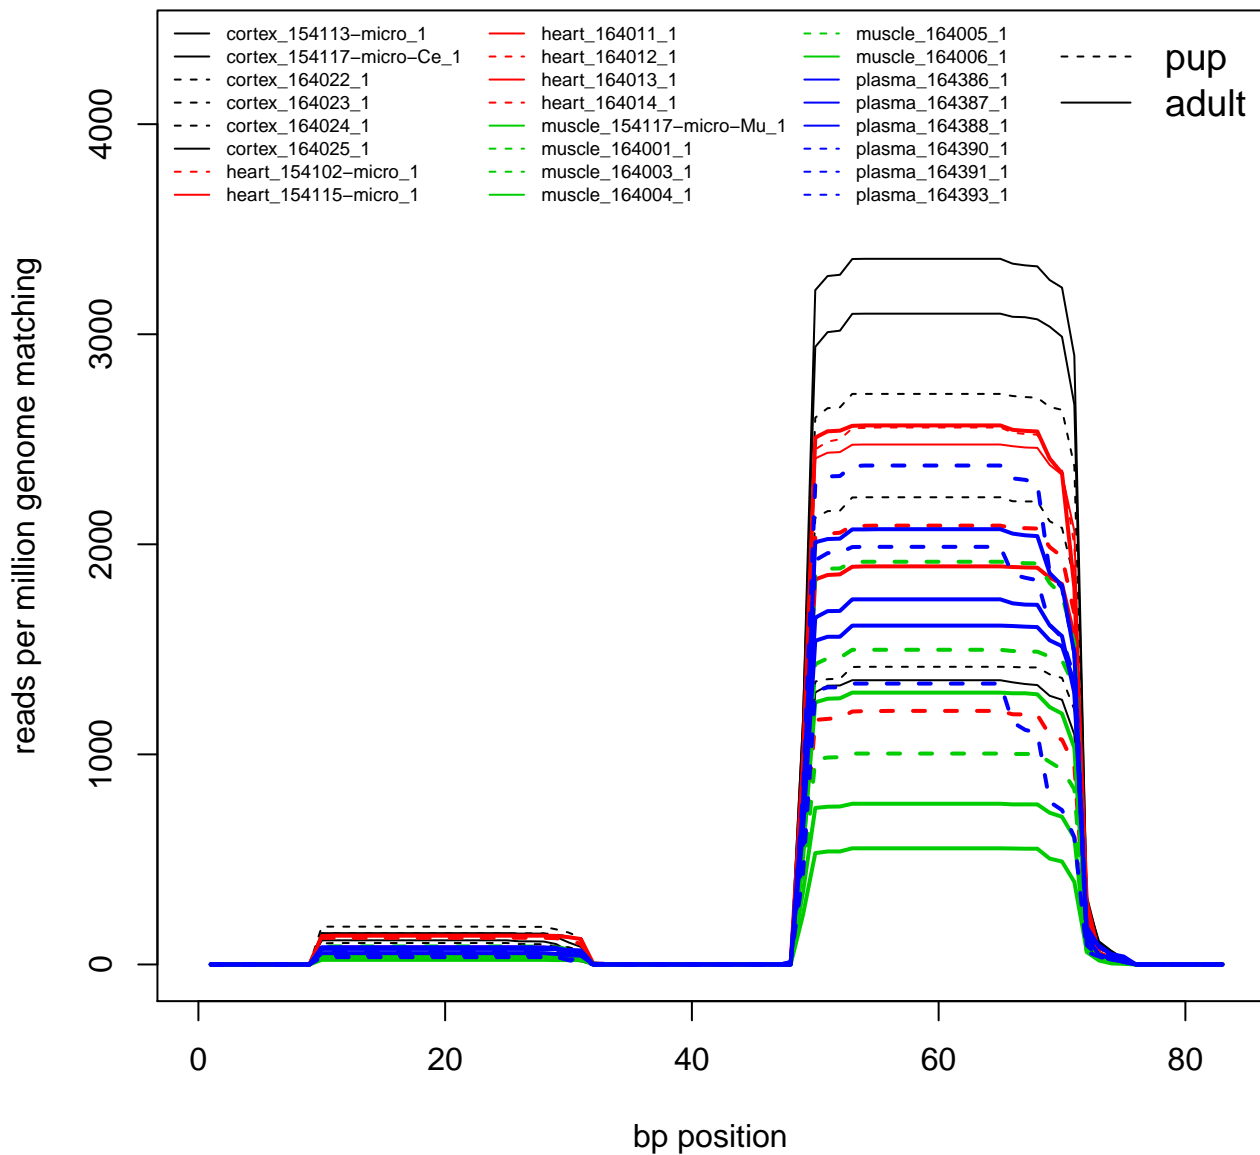

# lwe-miR-103\_loc1

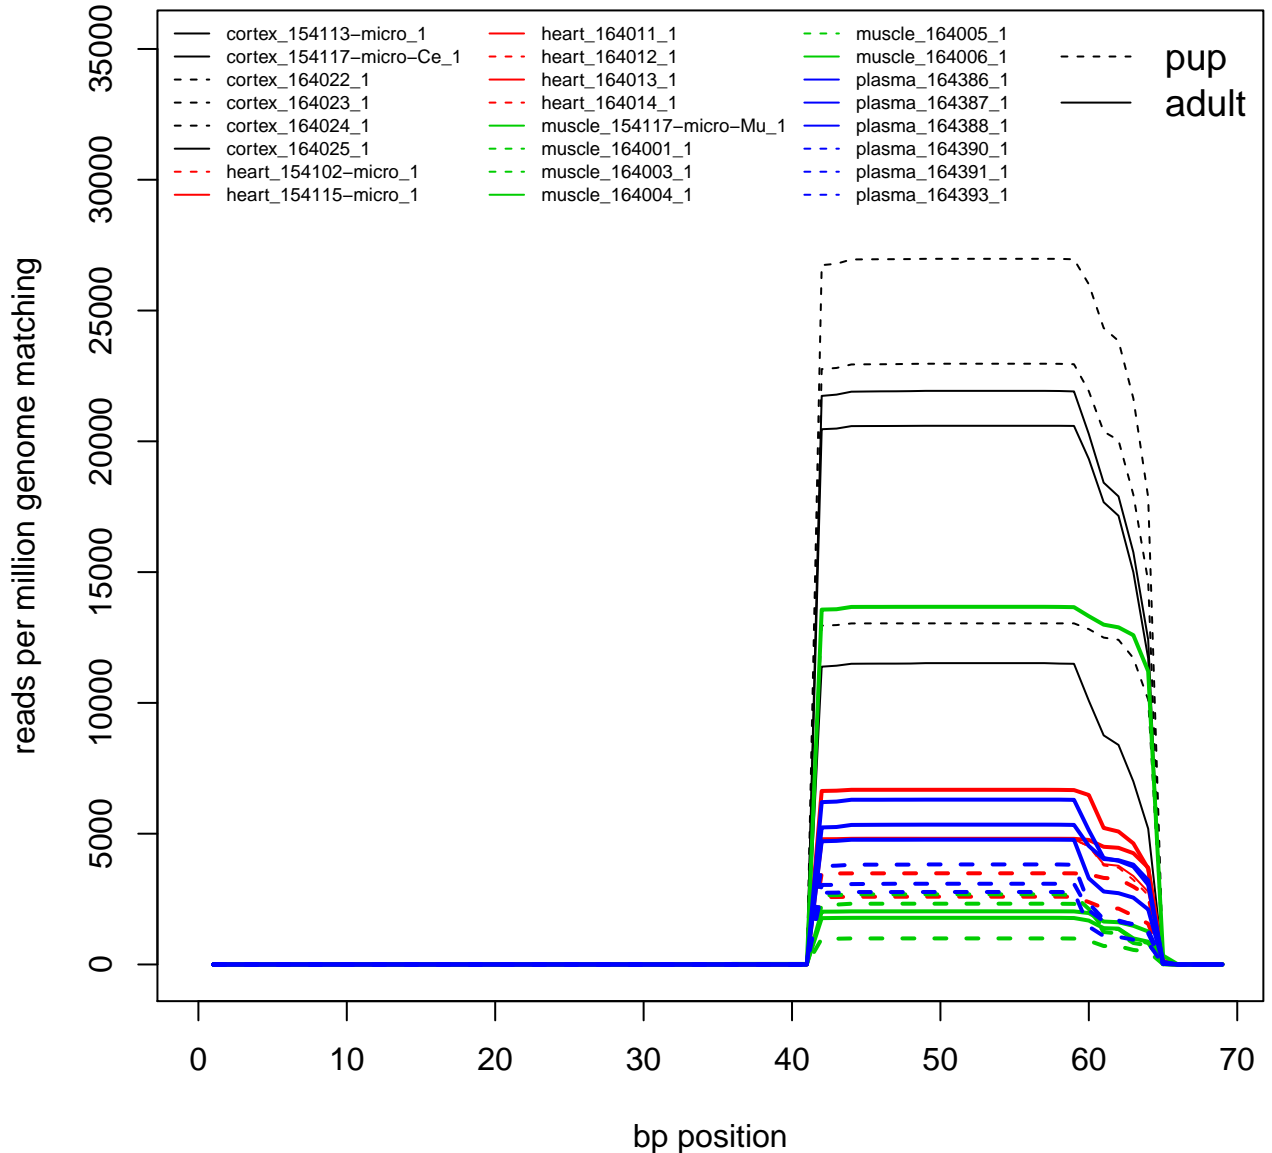

# lwe-miR-221\_loc1

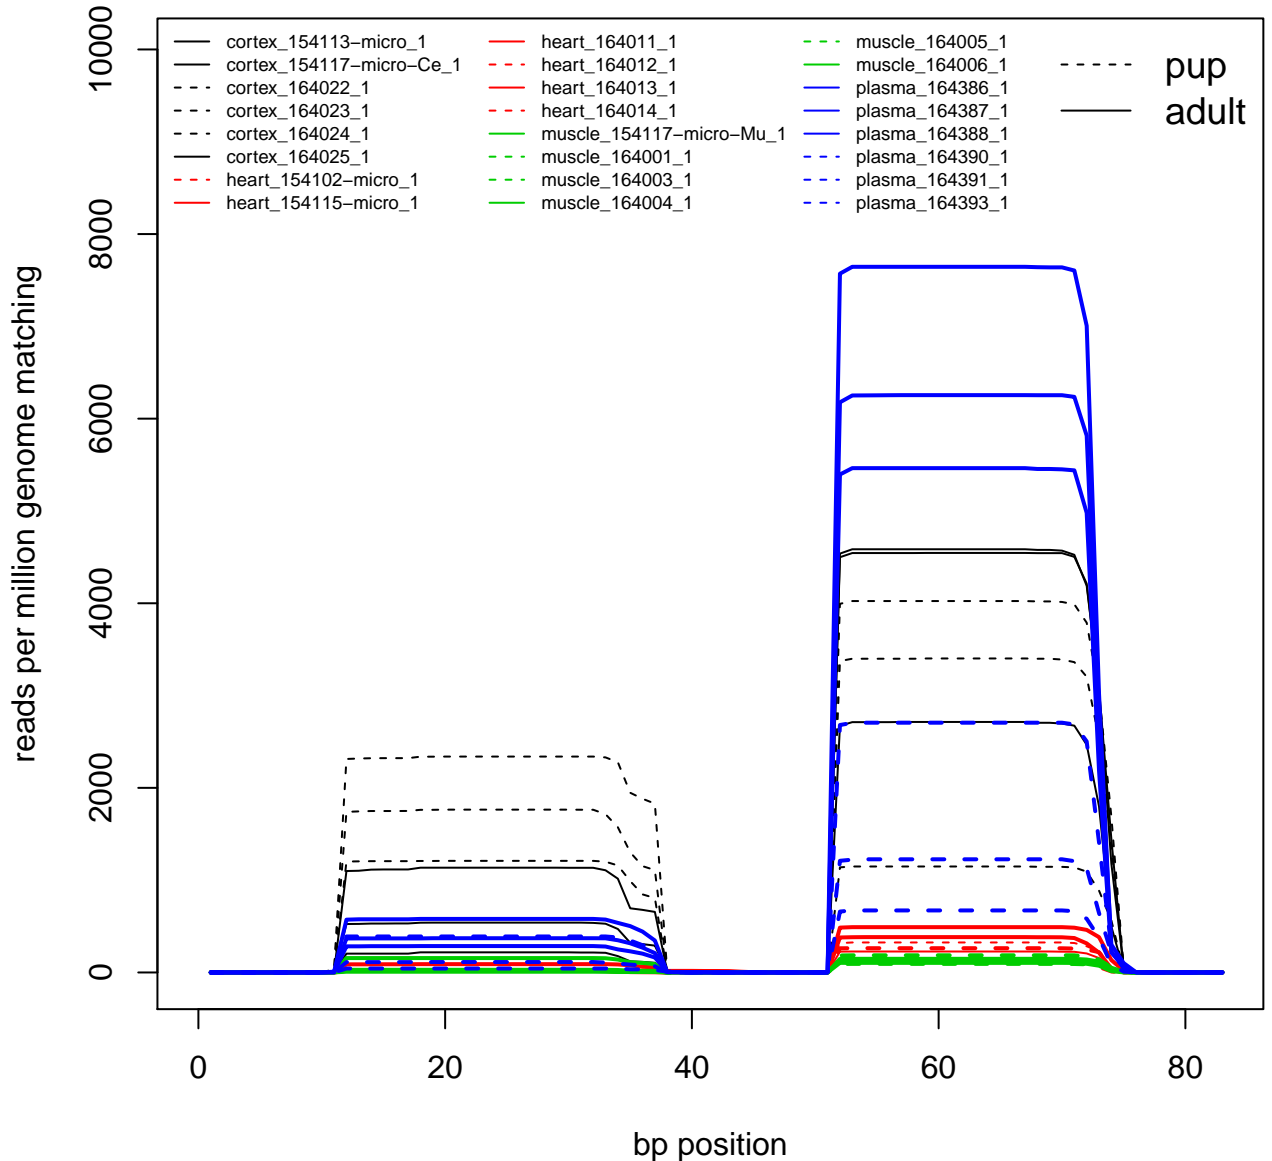

# lwe-miR-103\_loc2

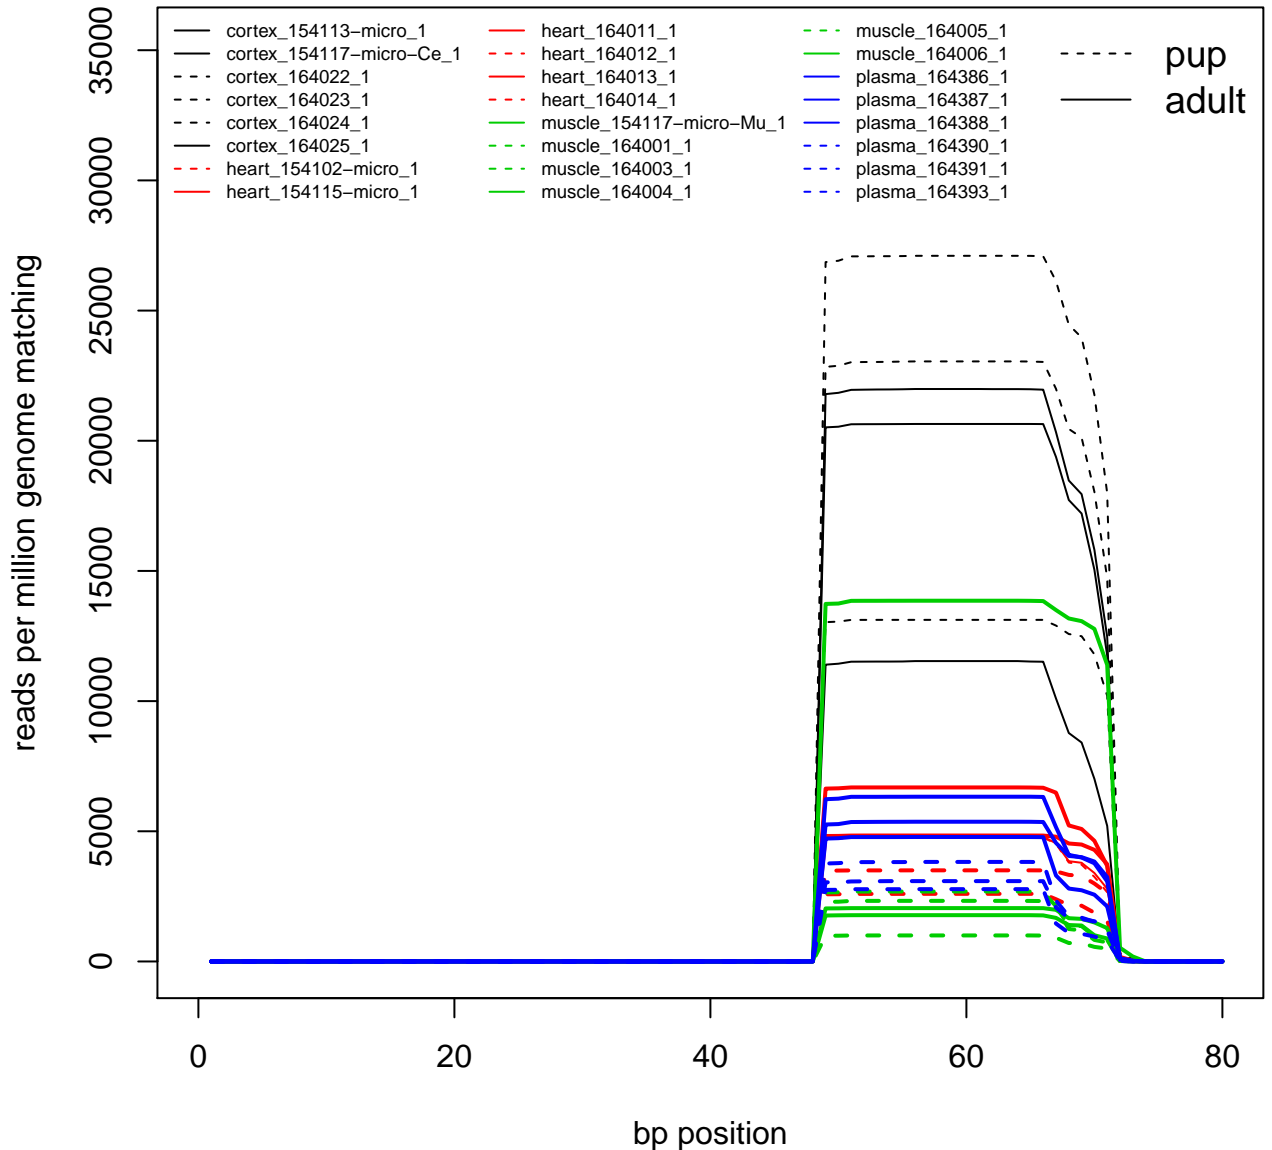

# lwe-miR-671\_loc1

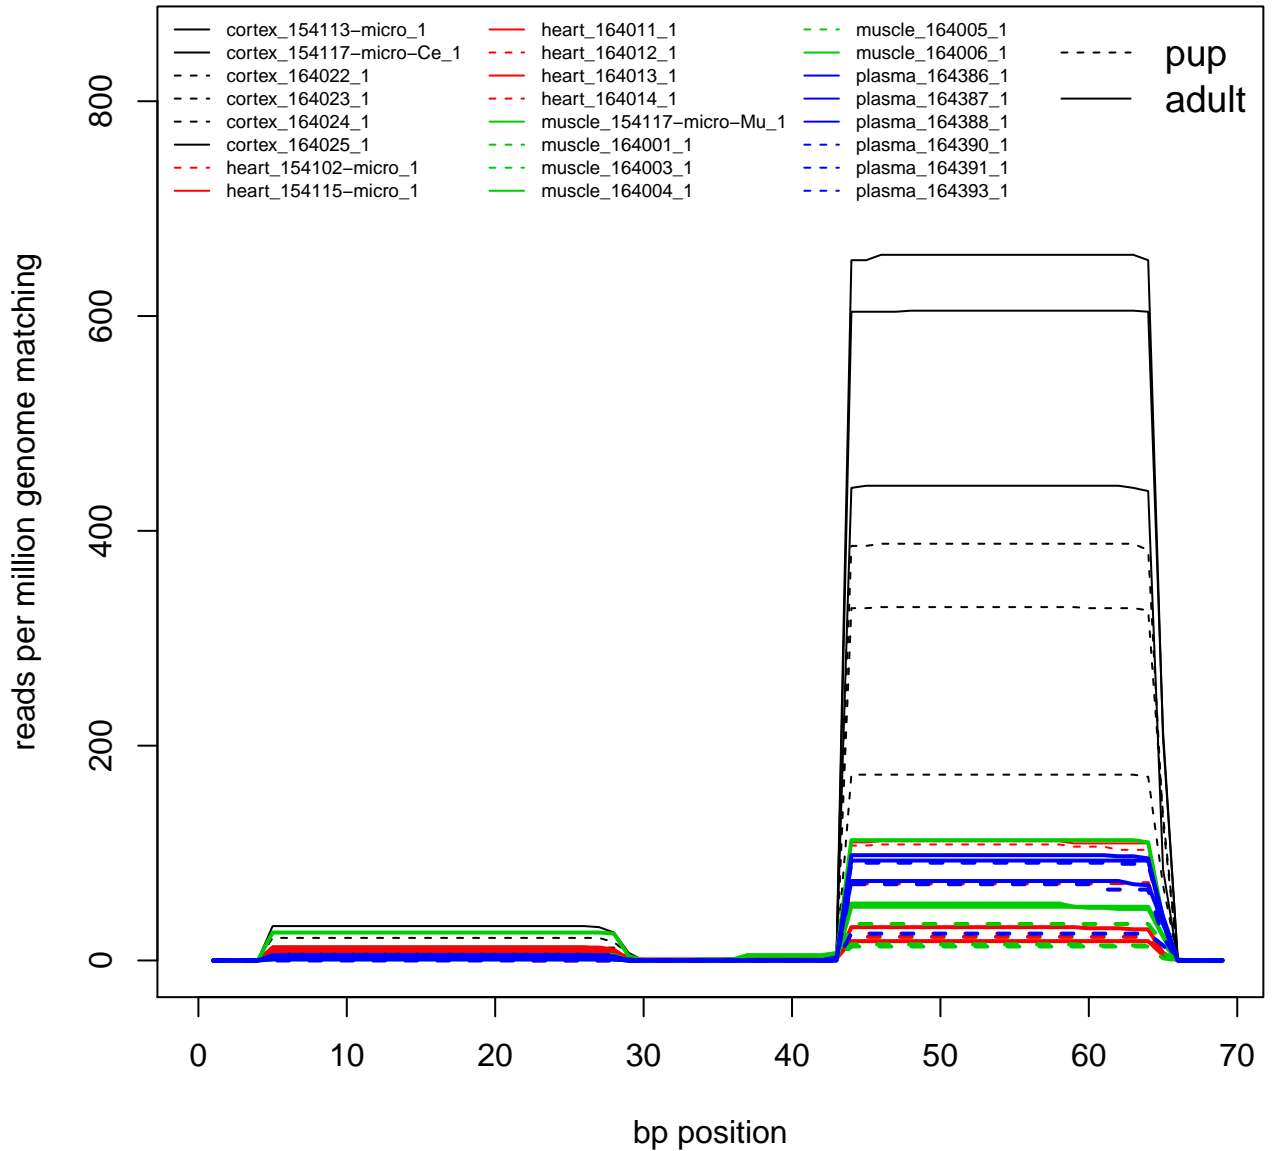

# novel\_83

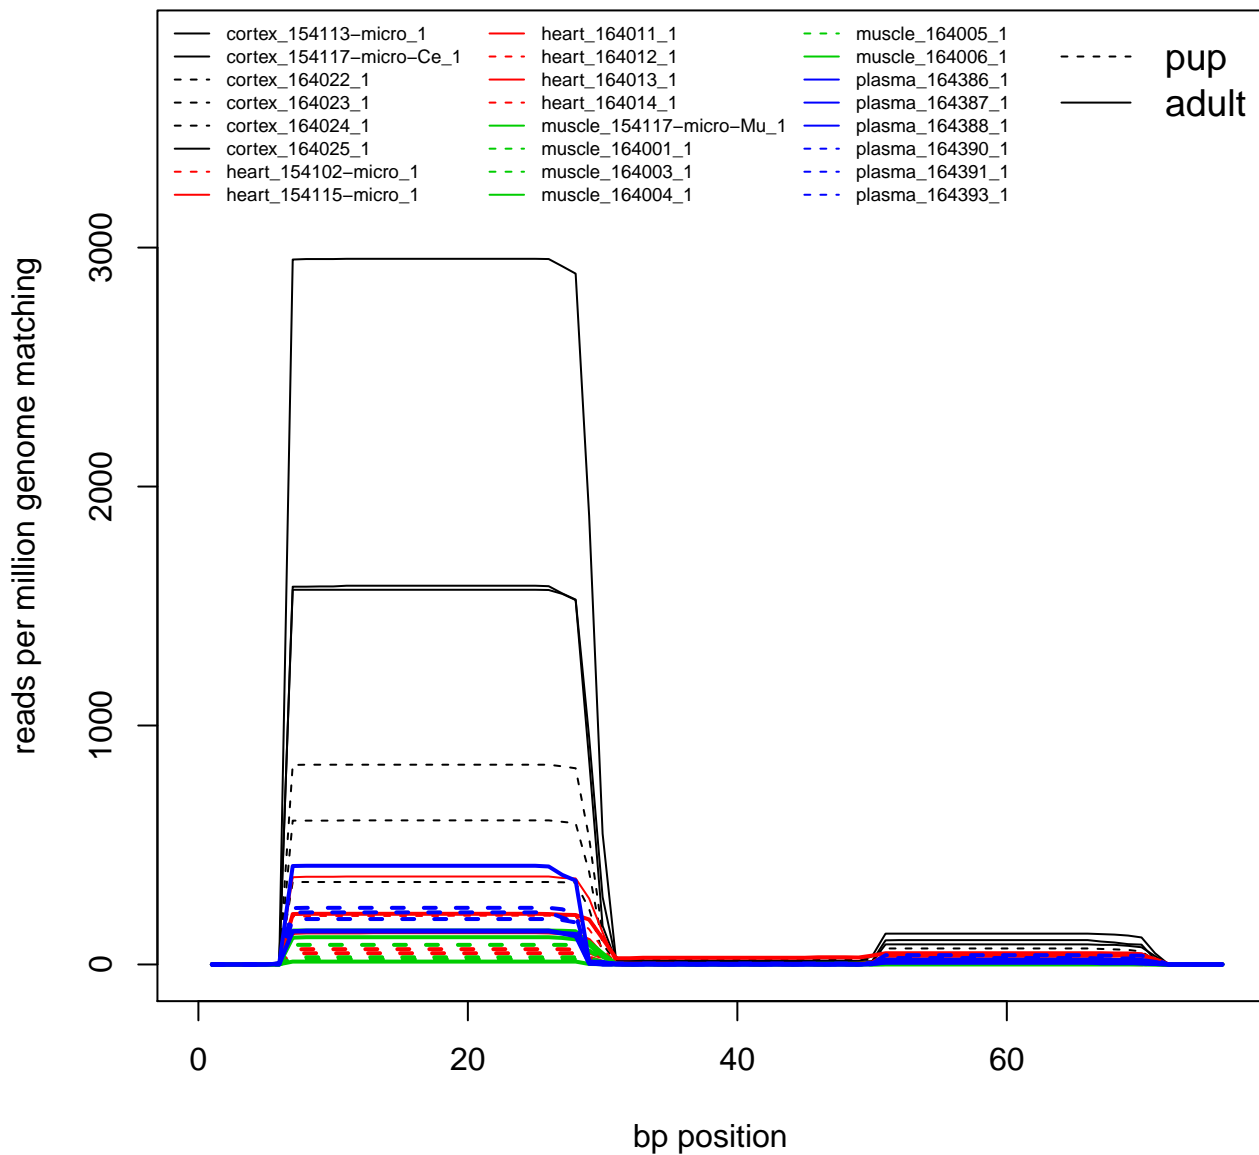



# lwe-miR-296\_loc1

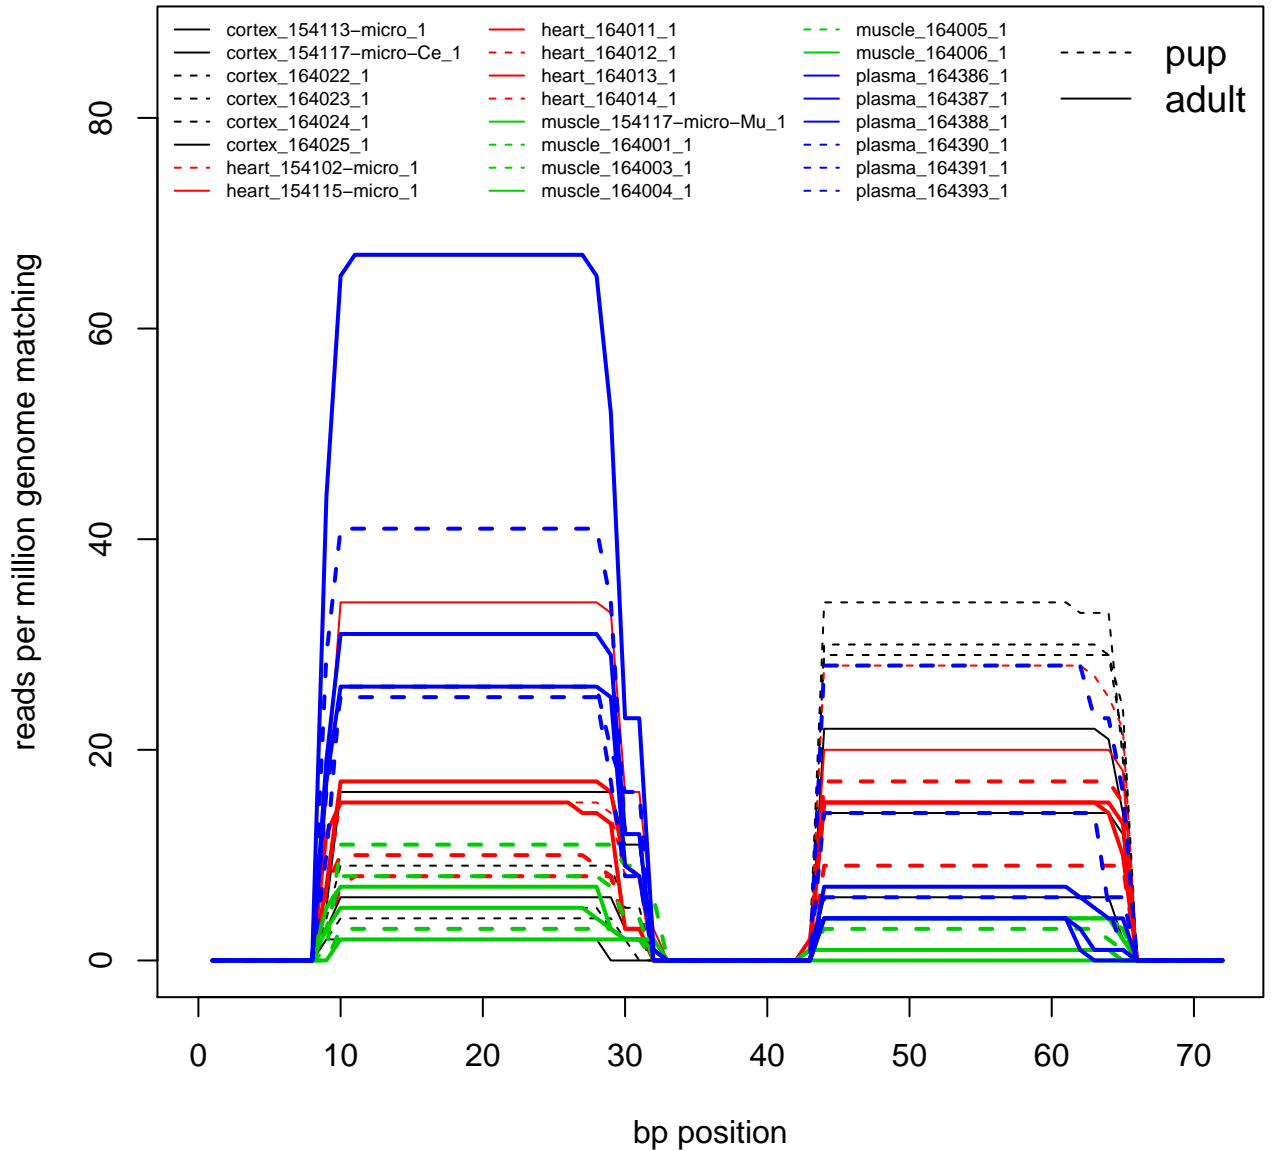







# lwe-miR-532\_loc1

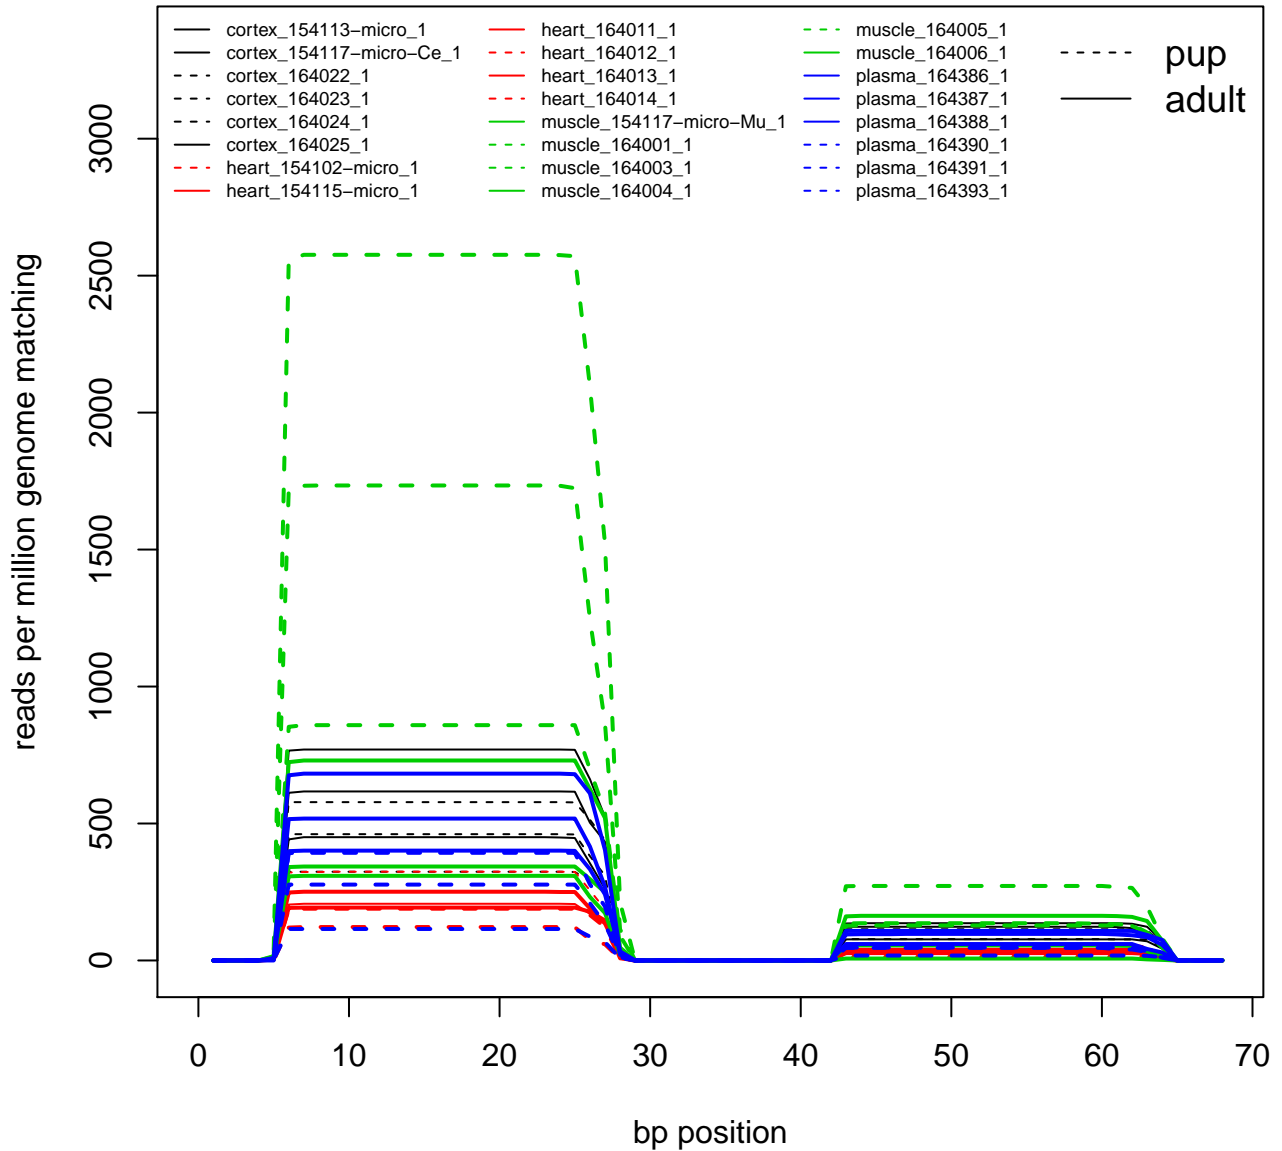

# lwe-miR-188\_loc1

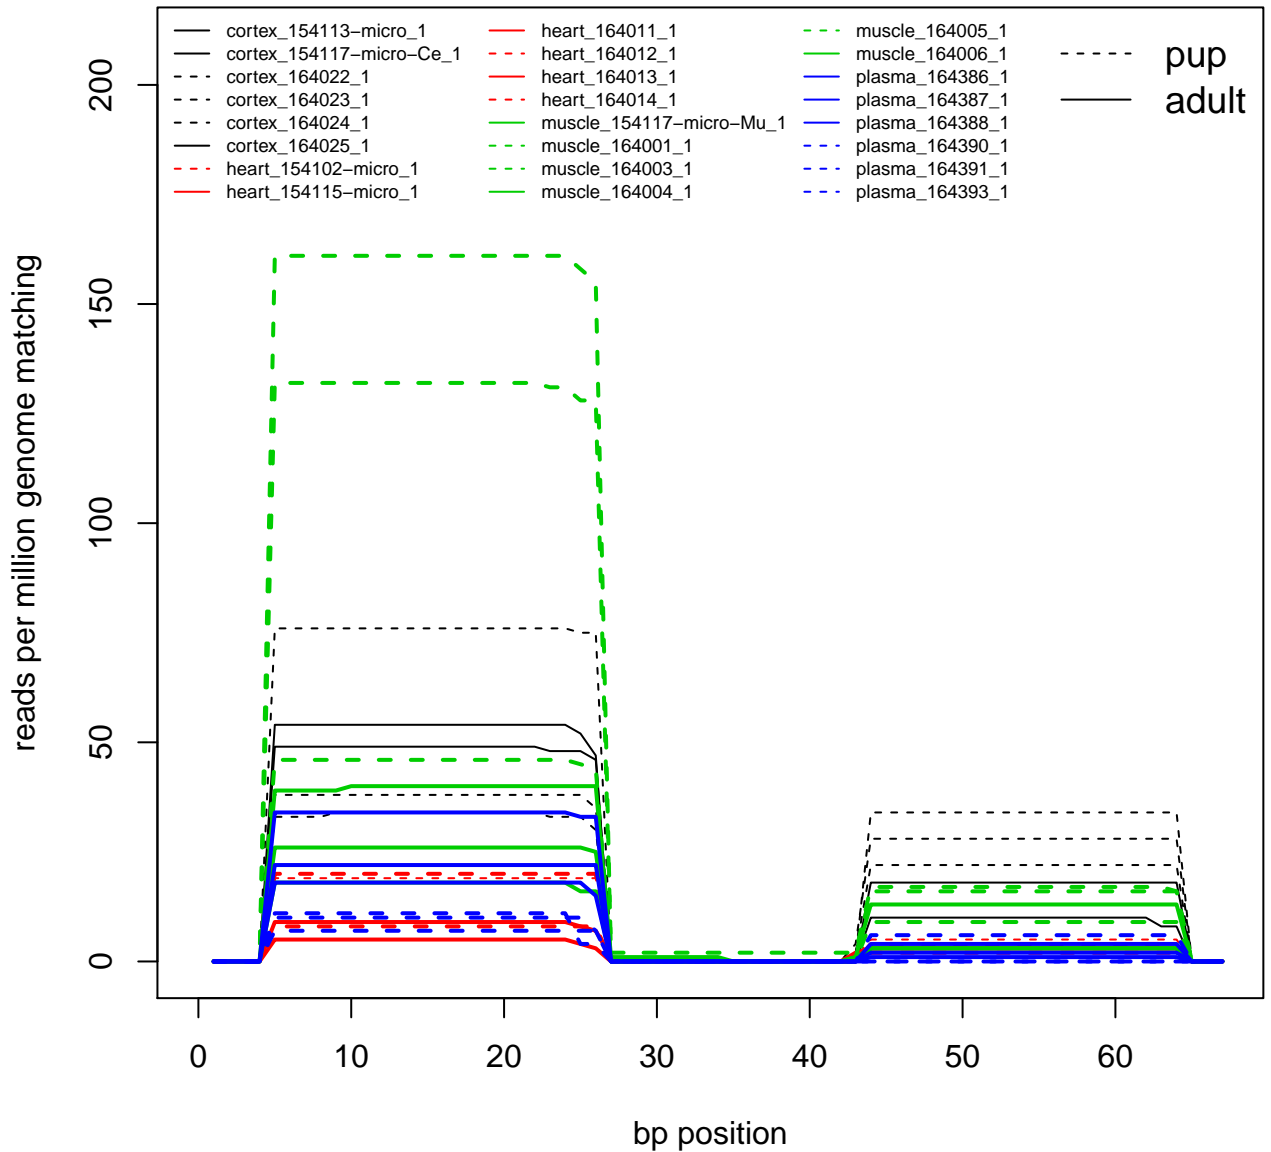

# lwe-miR-500b\_loc1

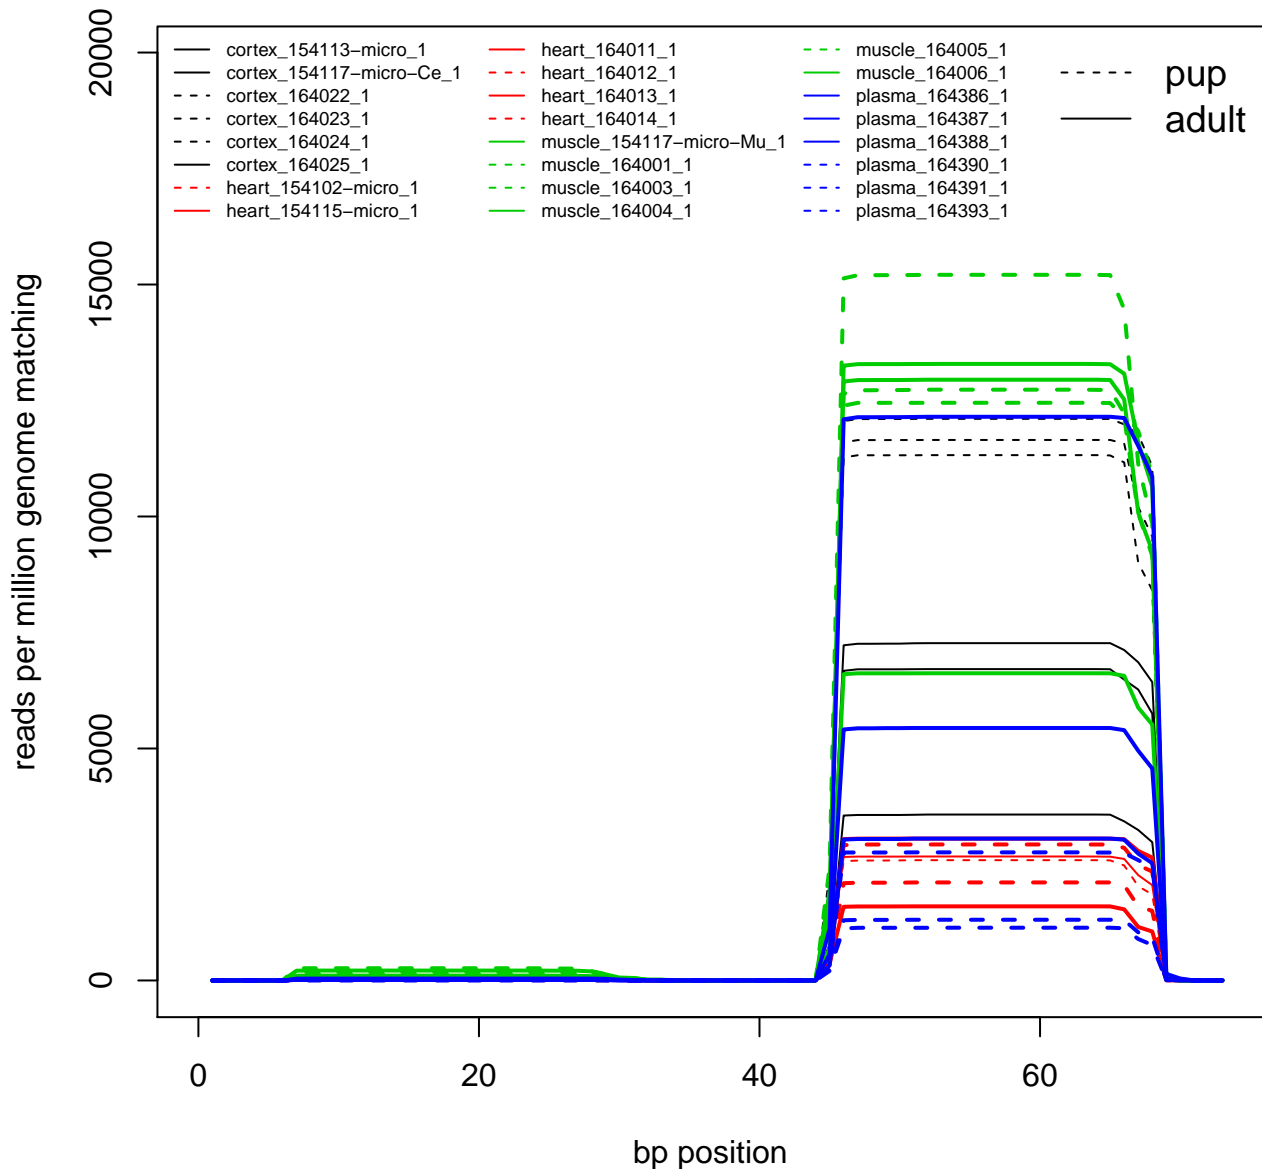

# lwe-miR-500b\_loc2

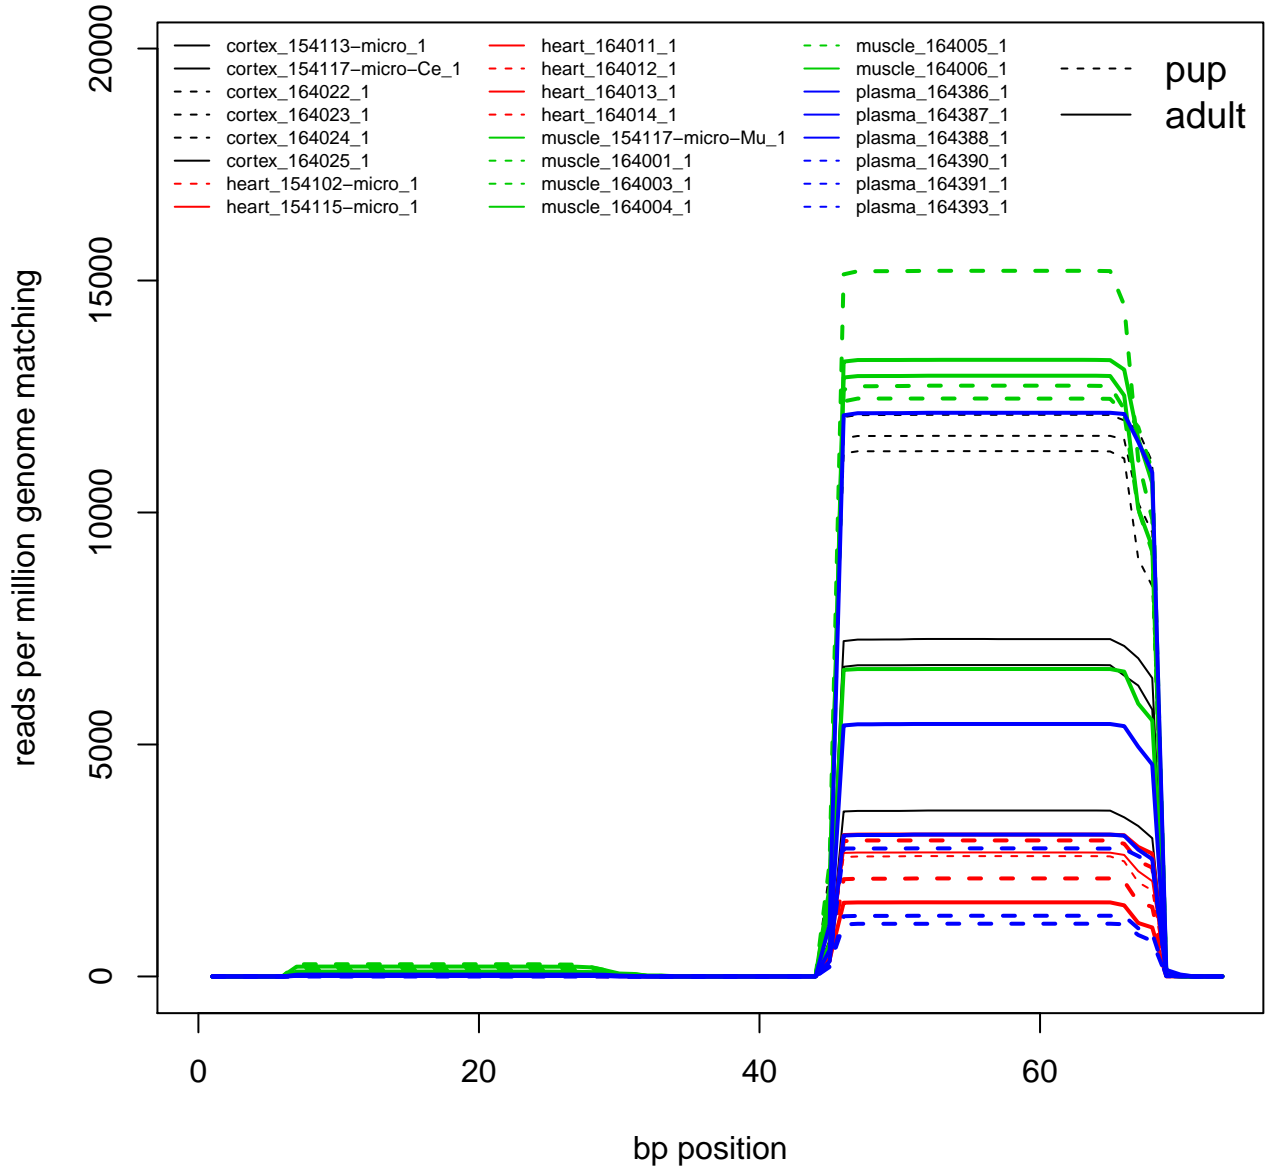

# lwe-miR-660\_loc1

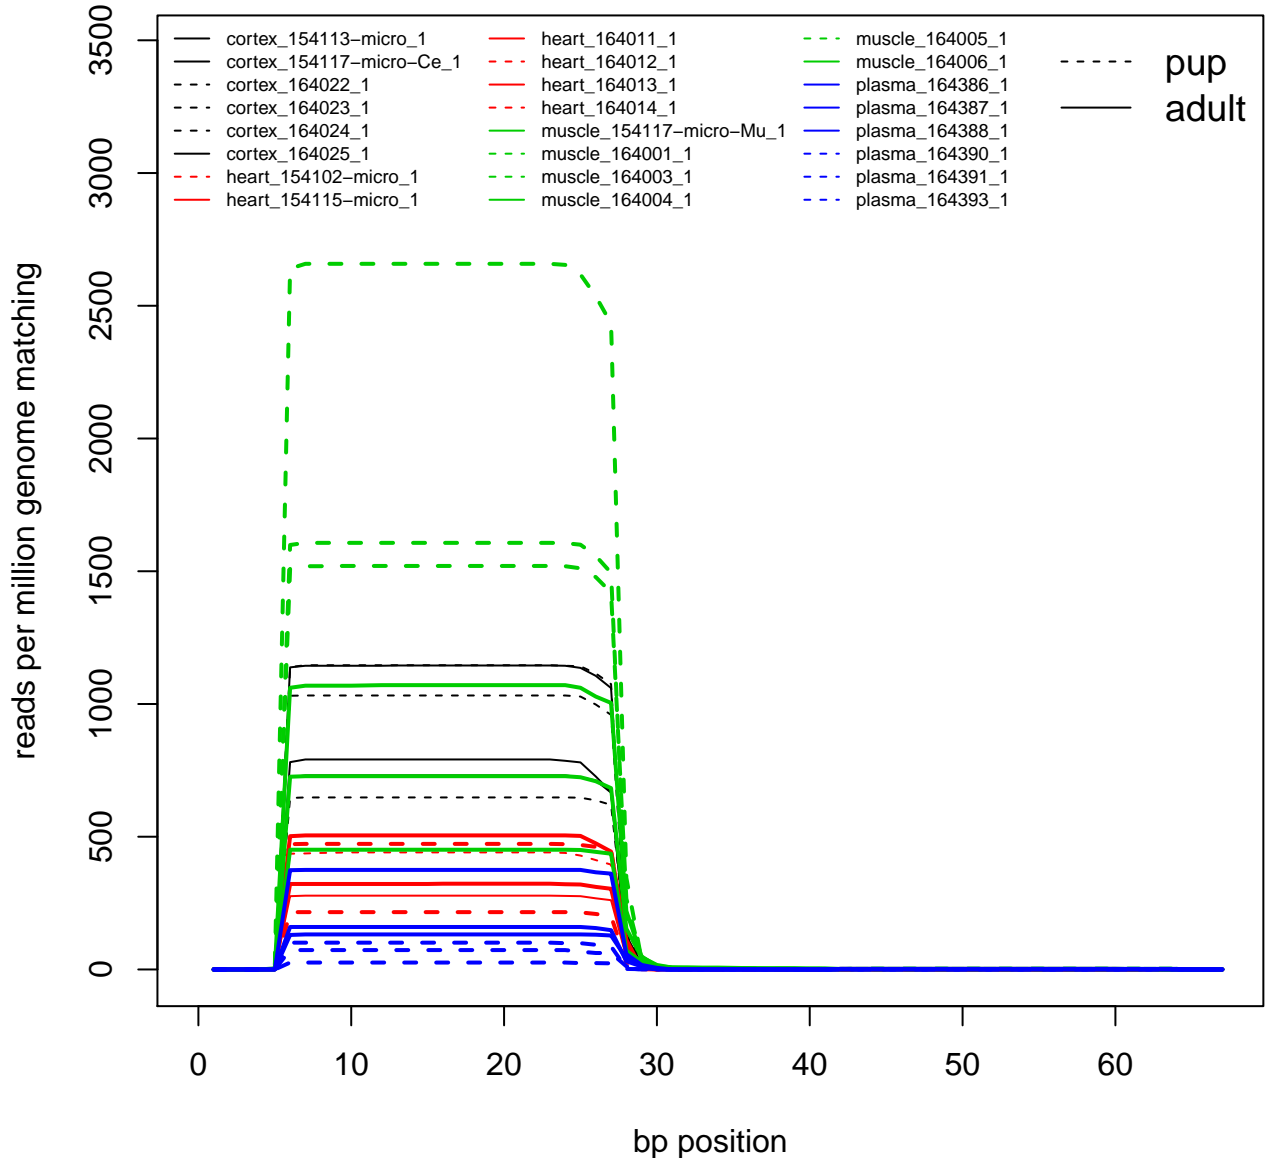

# lwe-miR-500b\_loc3

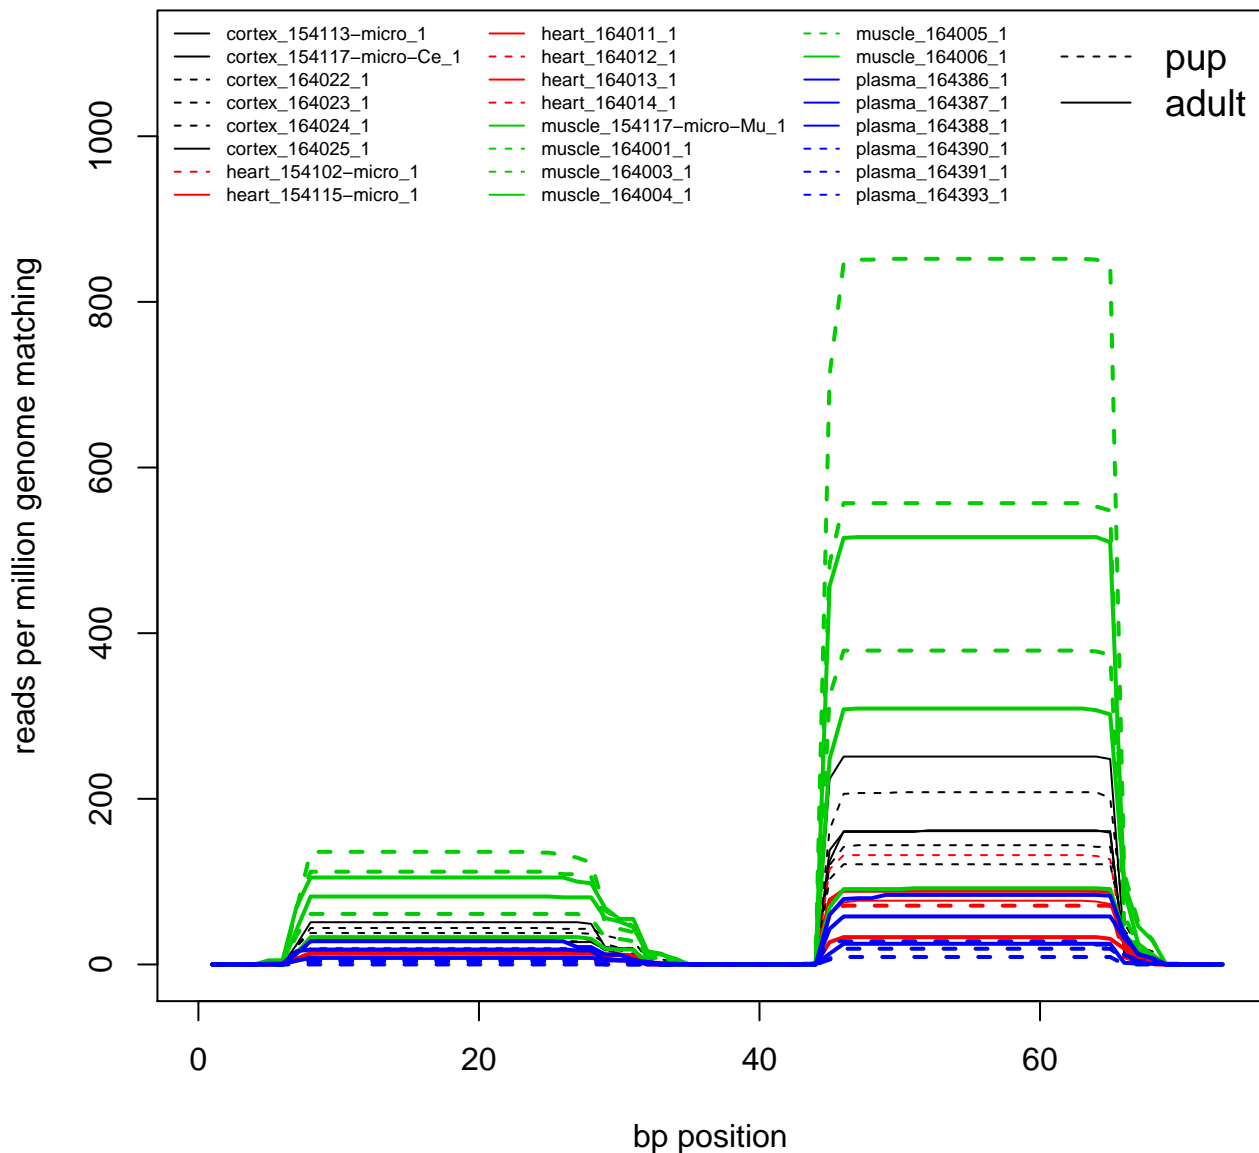





# lwe-miR-497\_loc1

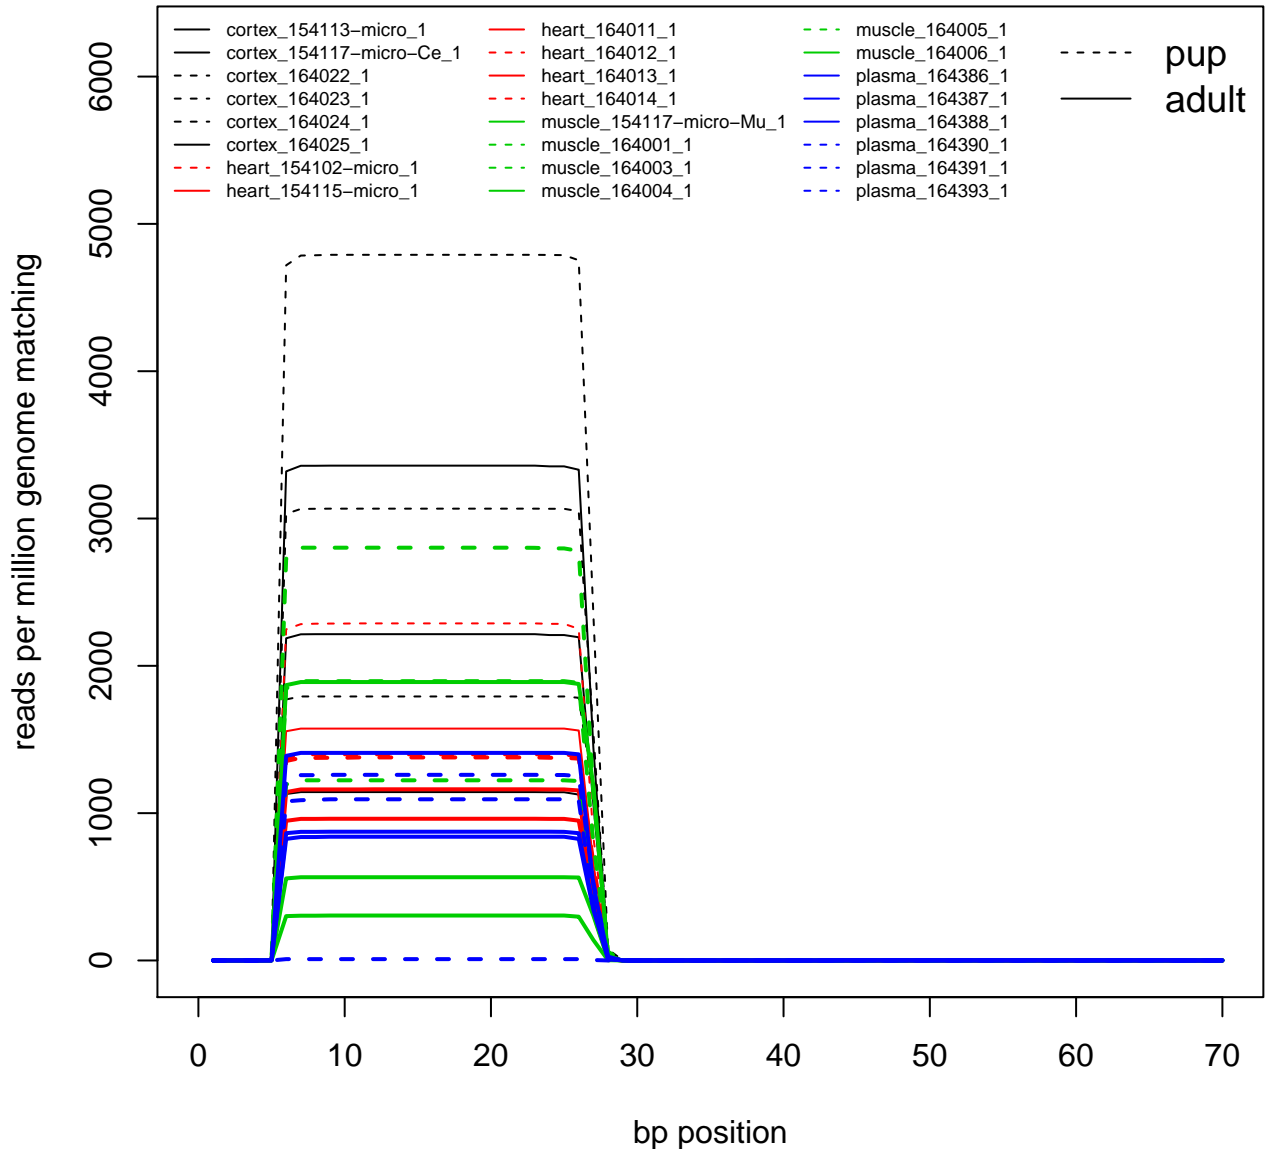

# lwe-miR-1249\_loc1

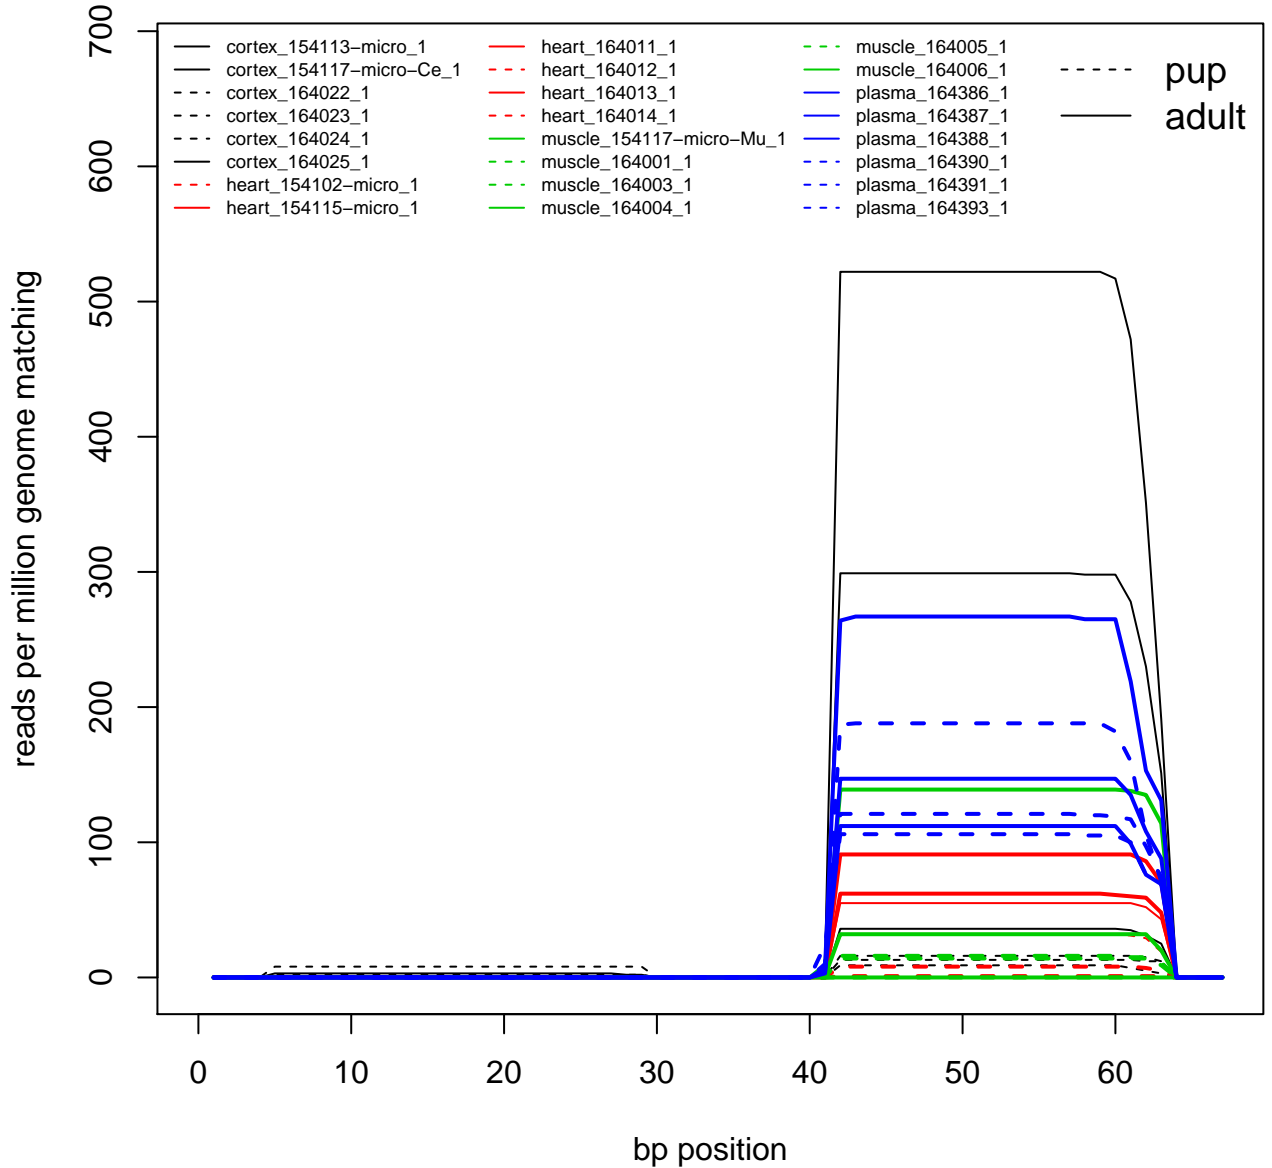



# novel\_88

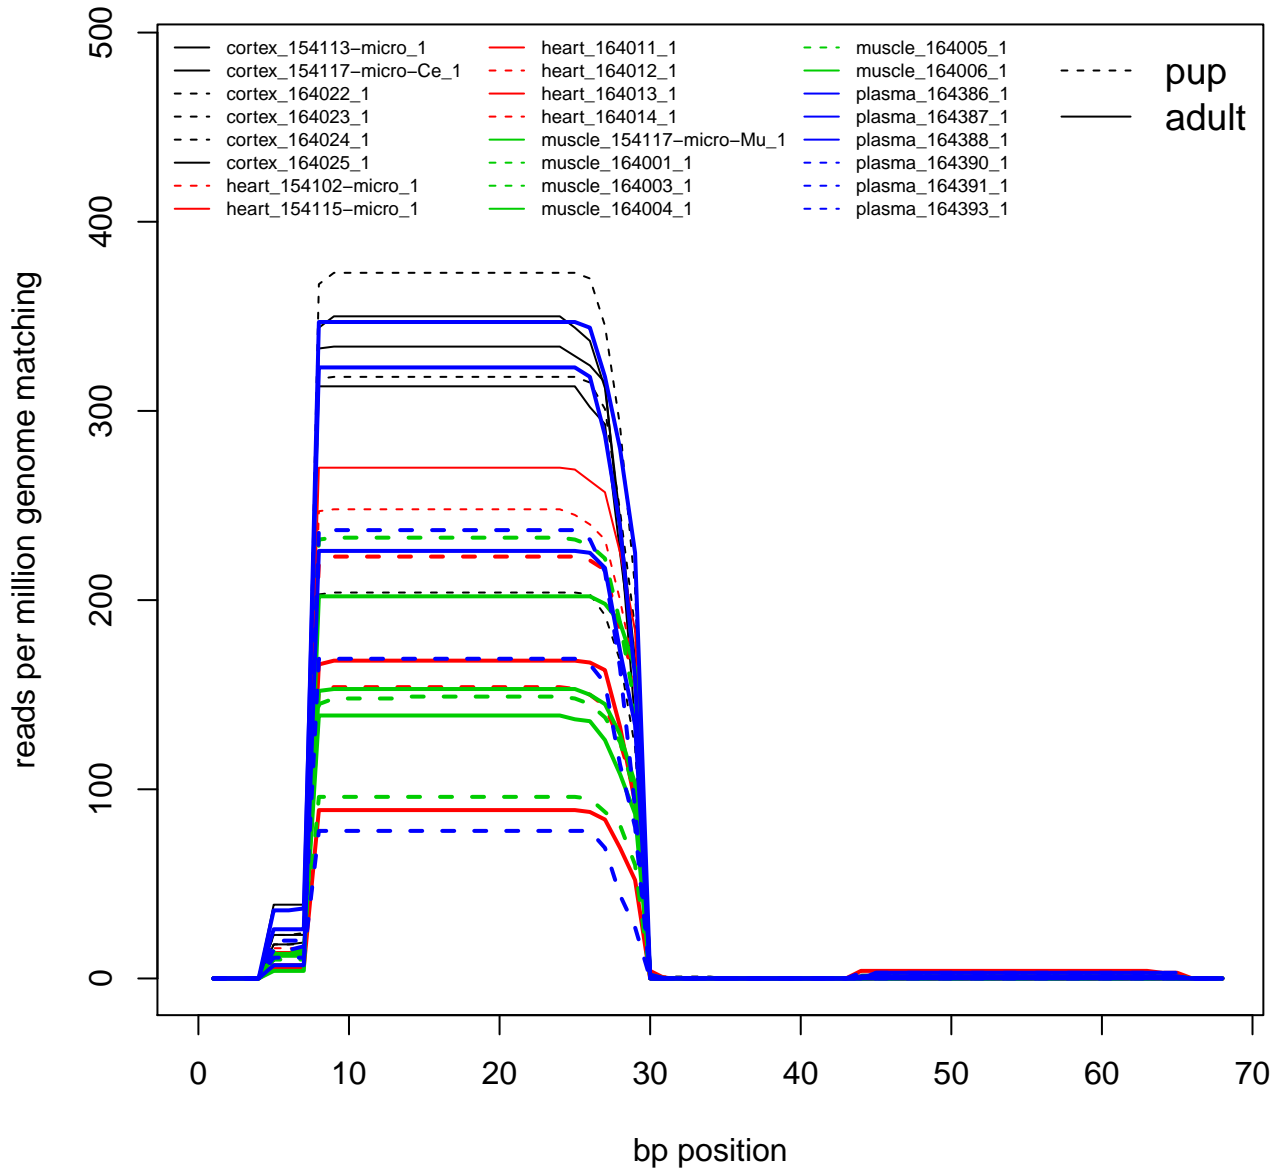

# novel\_89

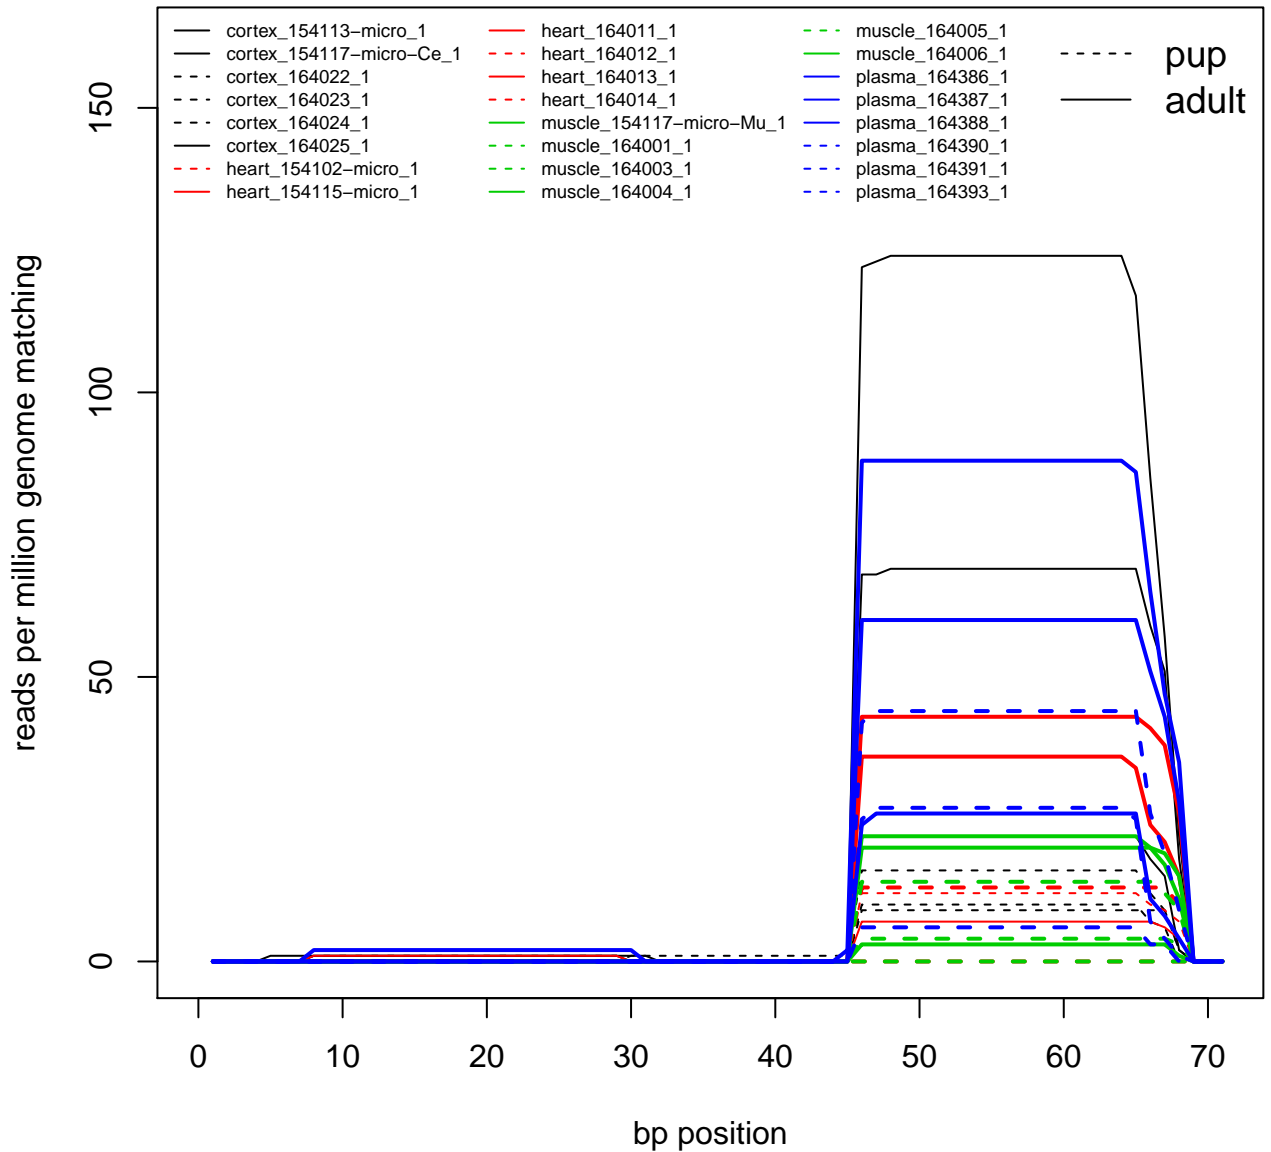



# novel\_90

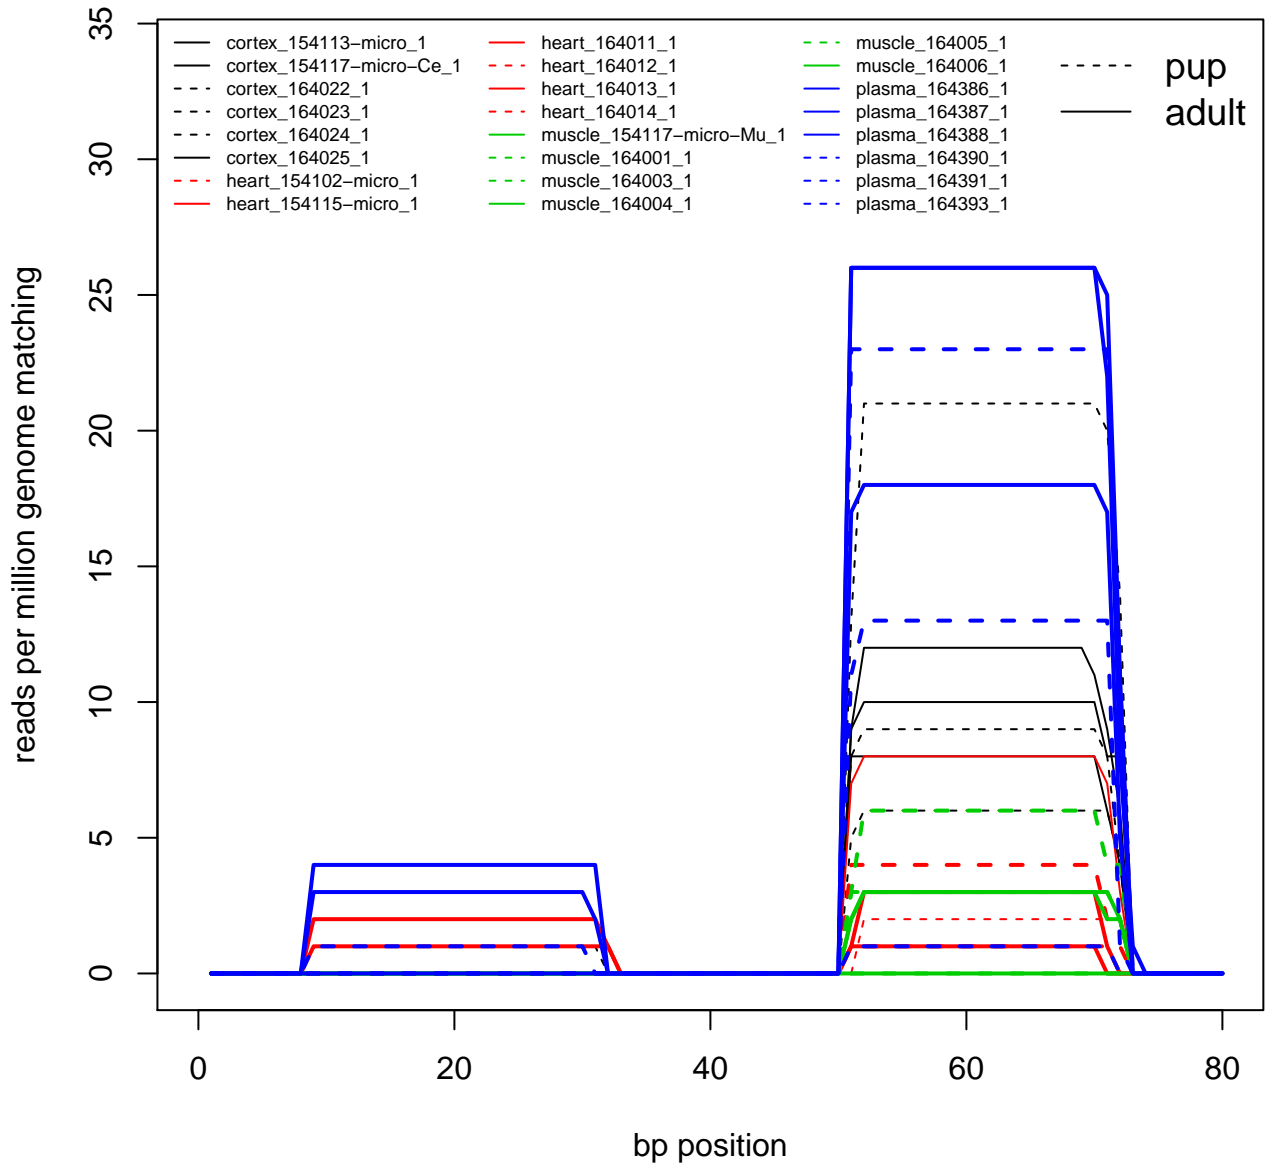



# novel\_91

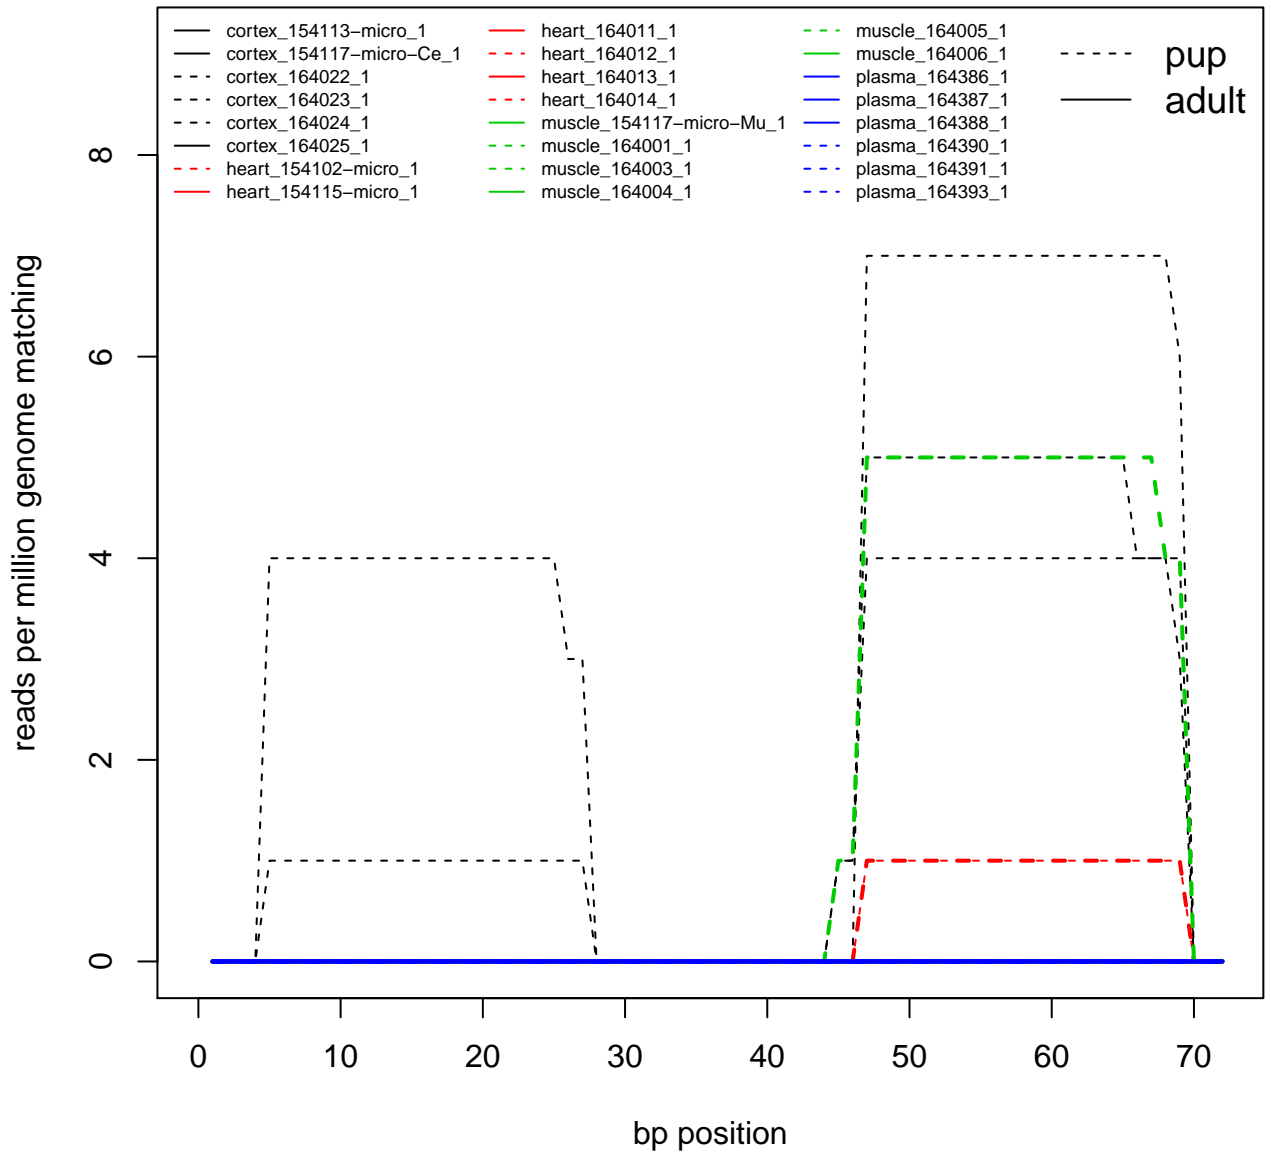



# lwe-miR-205a\_loc1

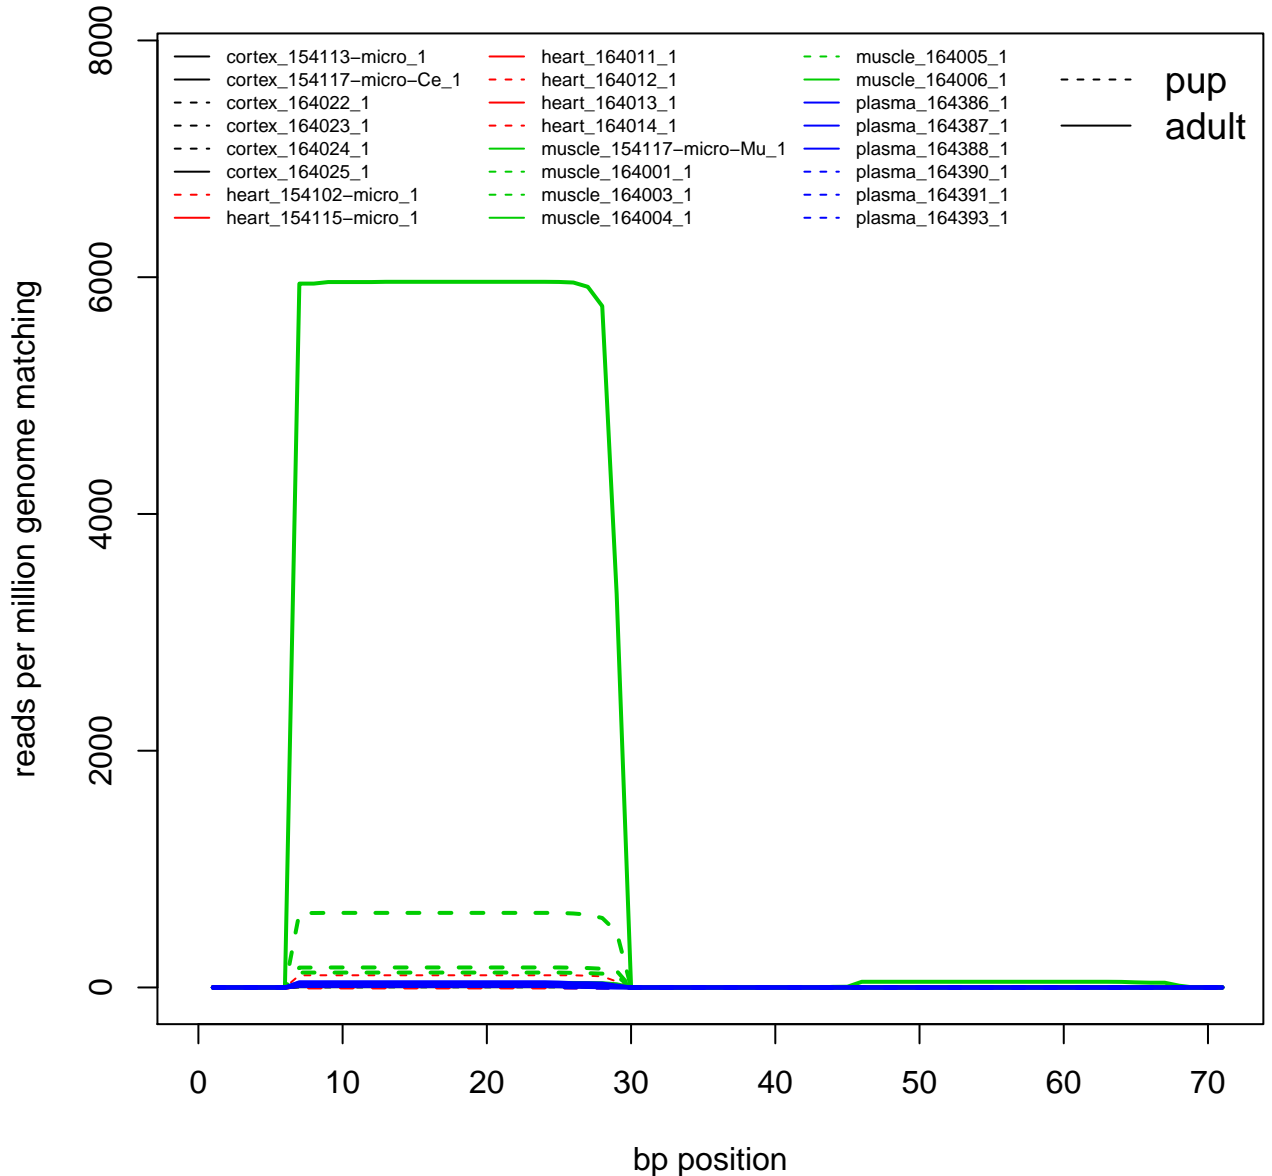



# novel\_94

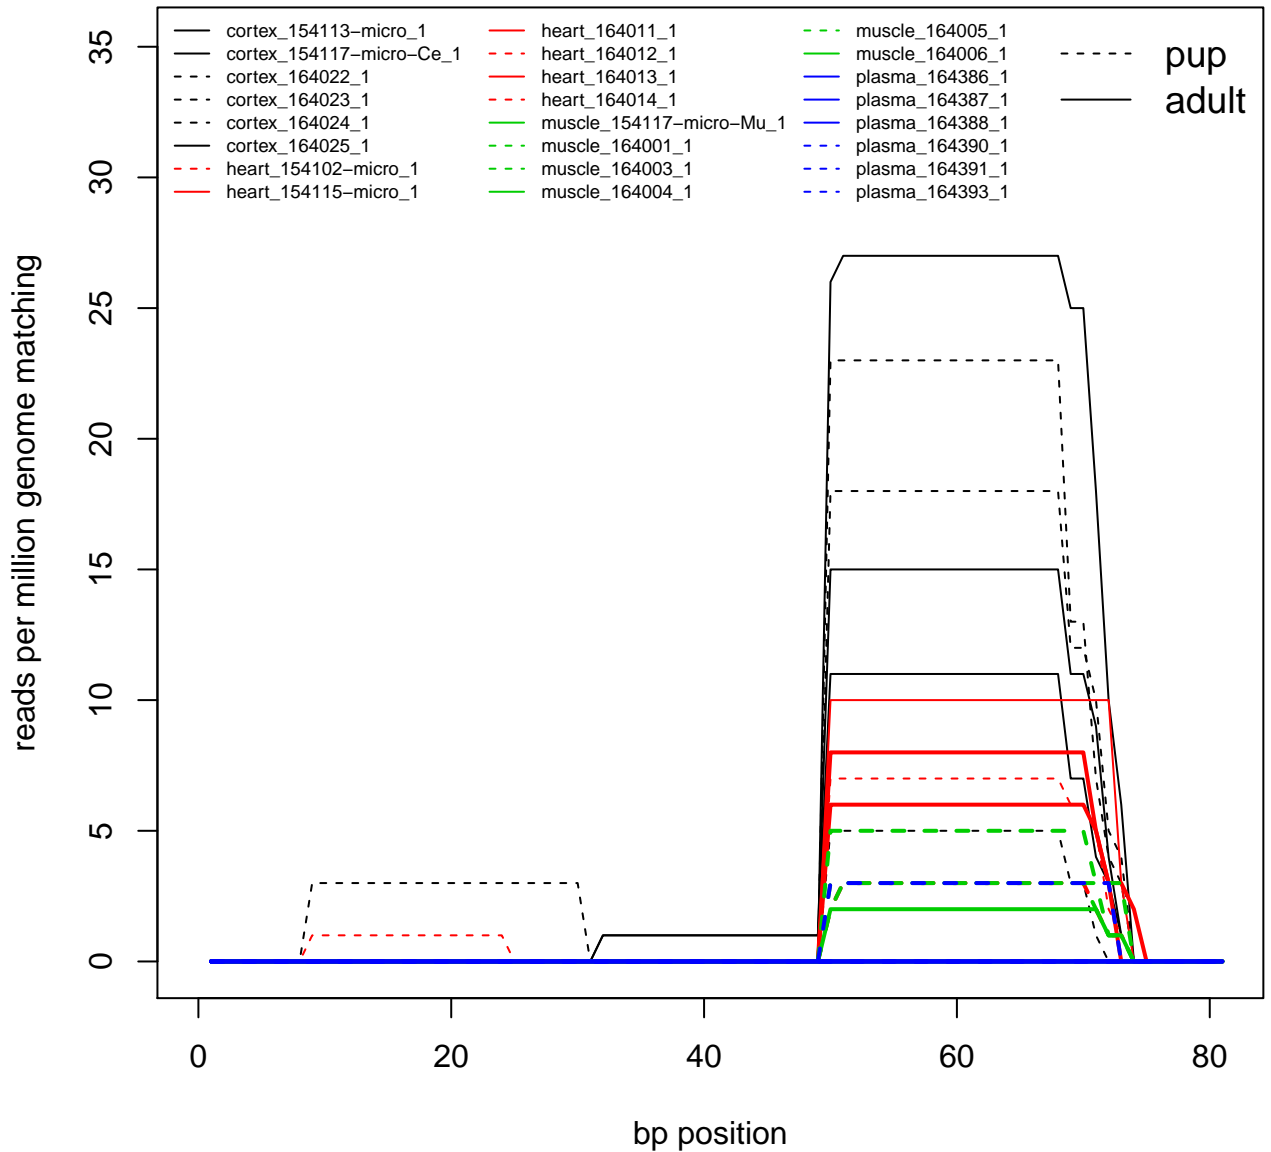

# lwe-miR-424\_loc1

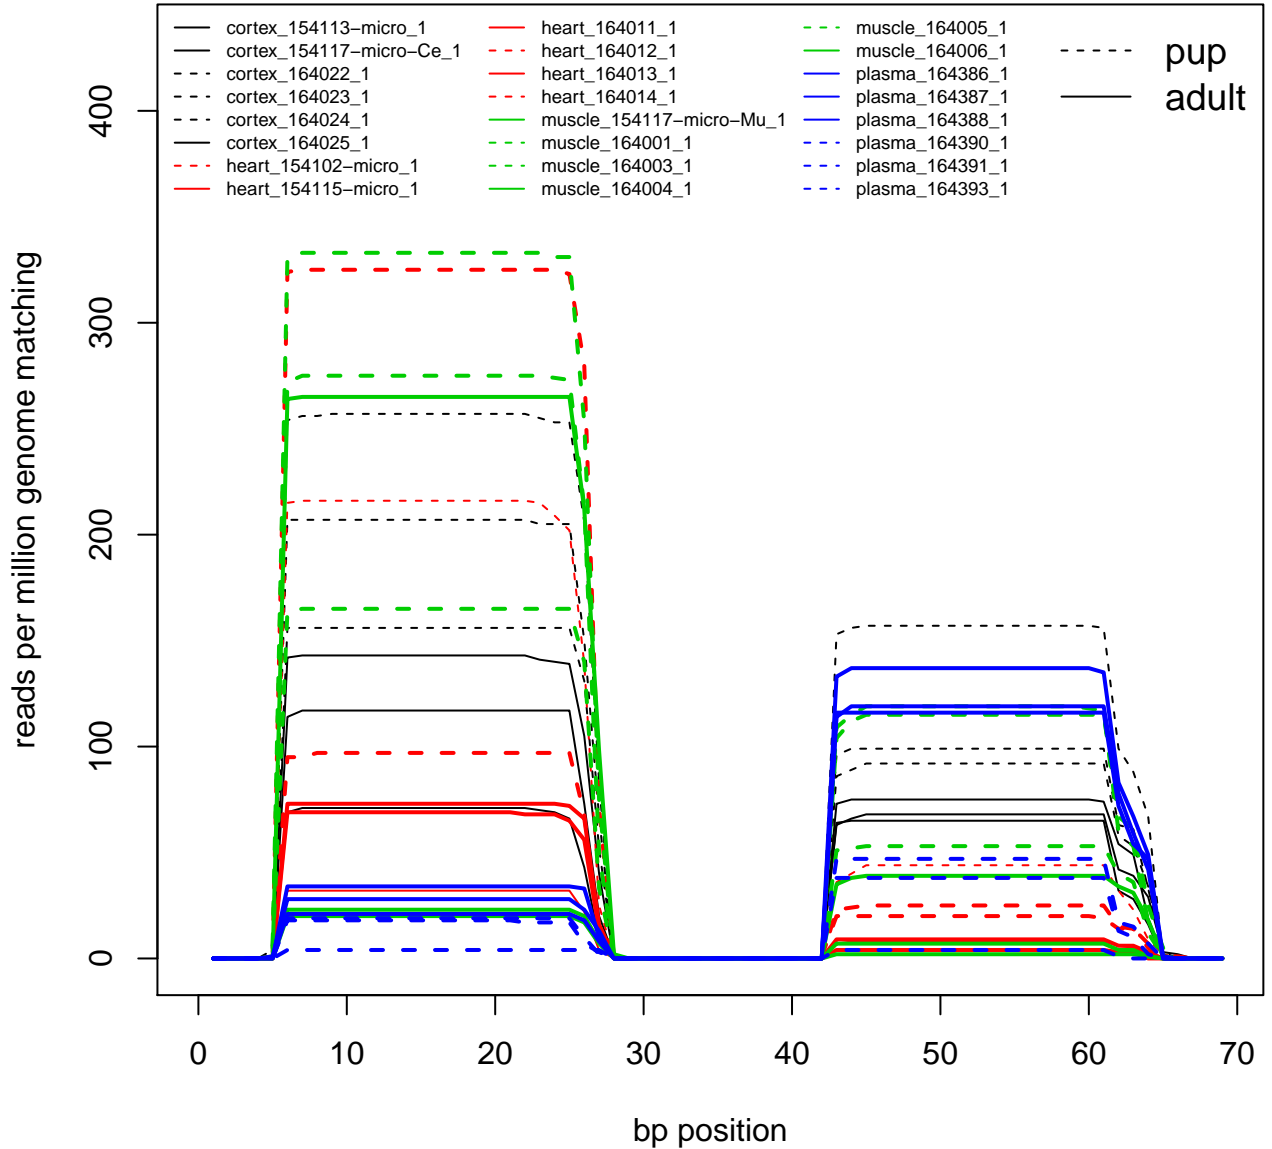

# lwe-miR-503\_loc1

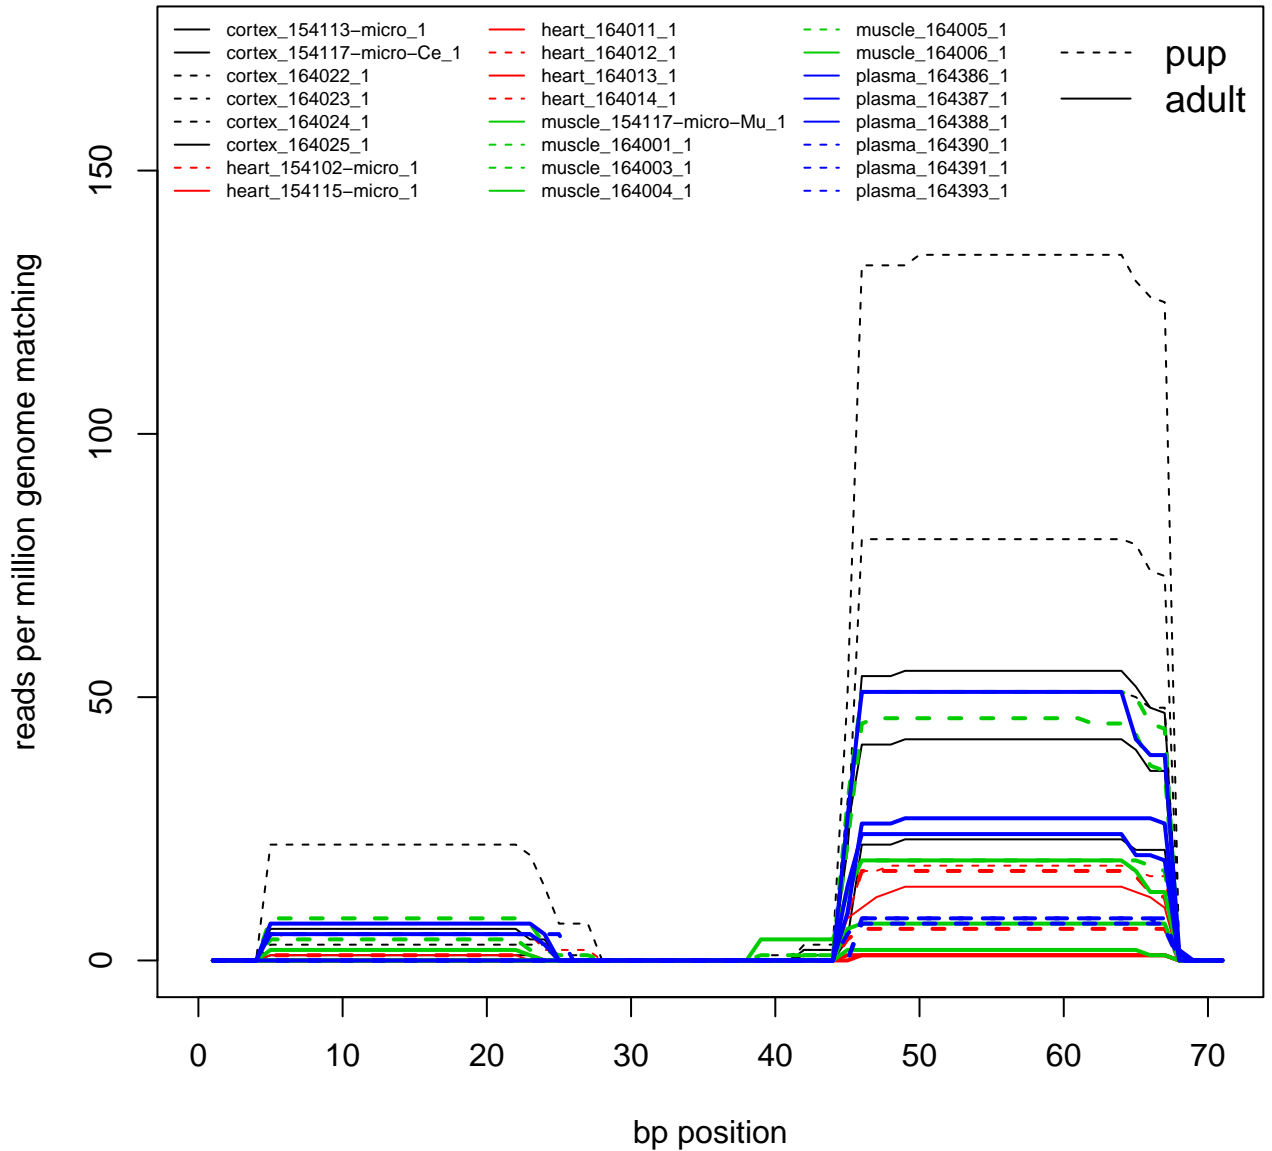

# lwe-miR-542\_loc1

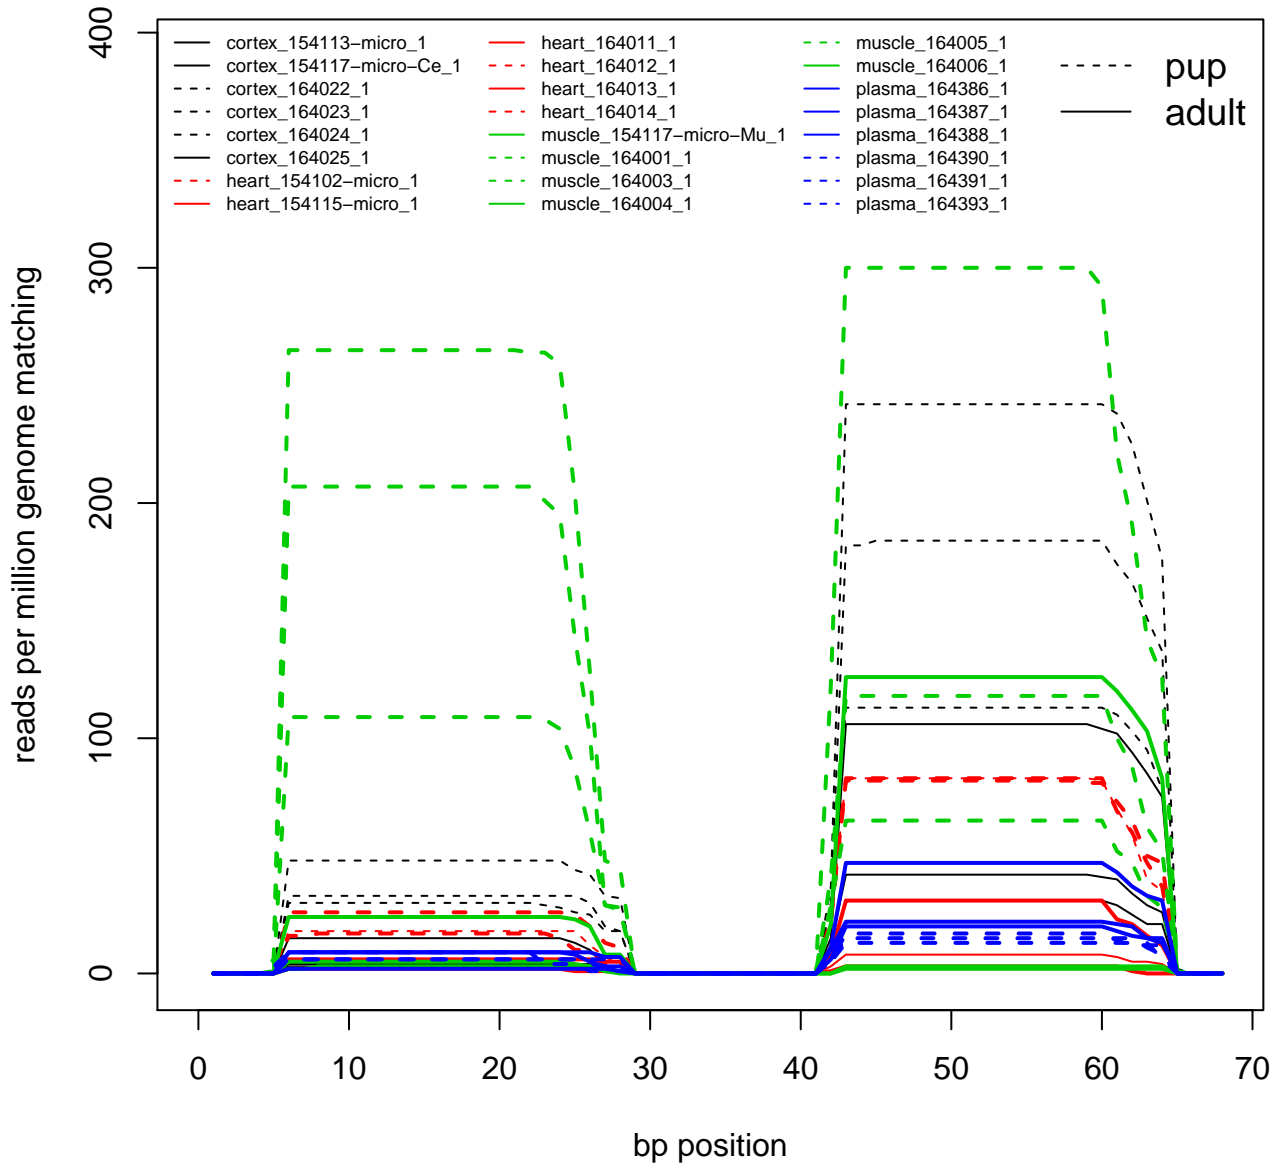



# lwe-miR-450\_loc1

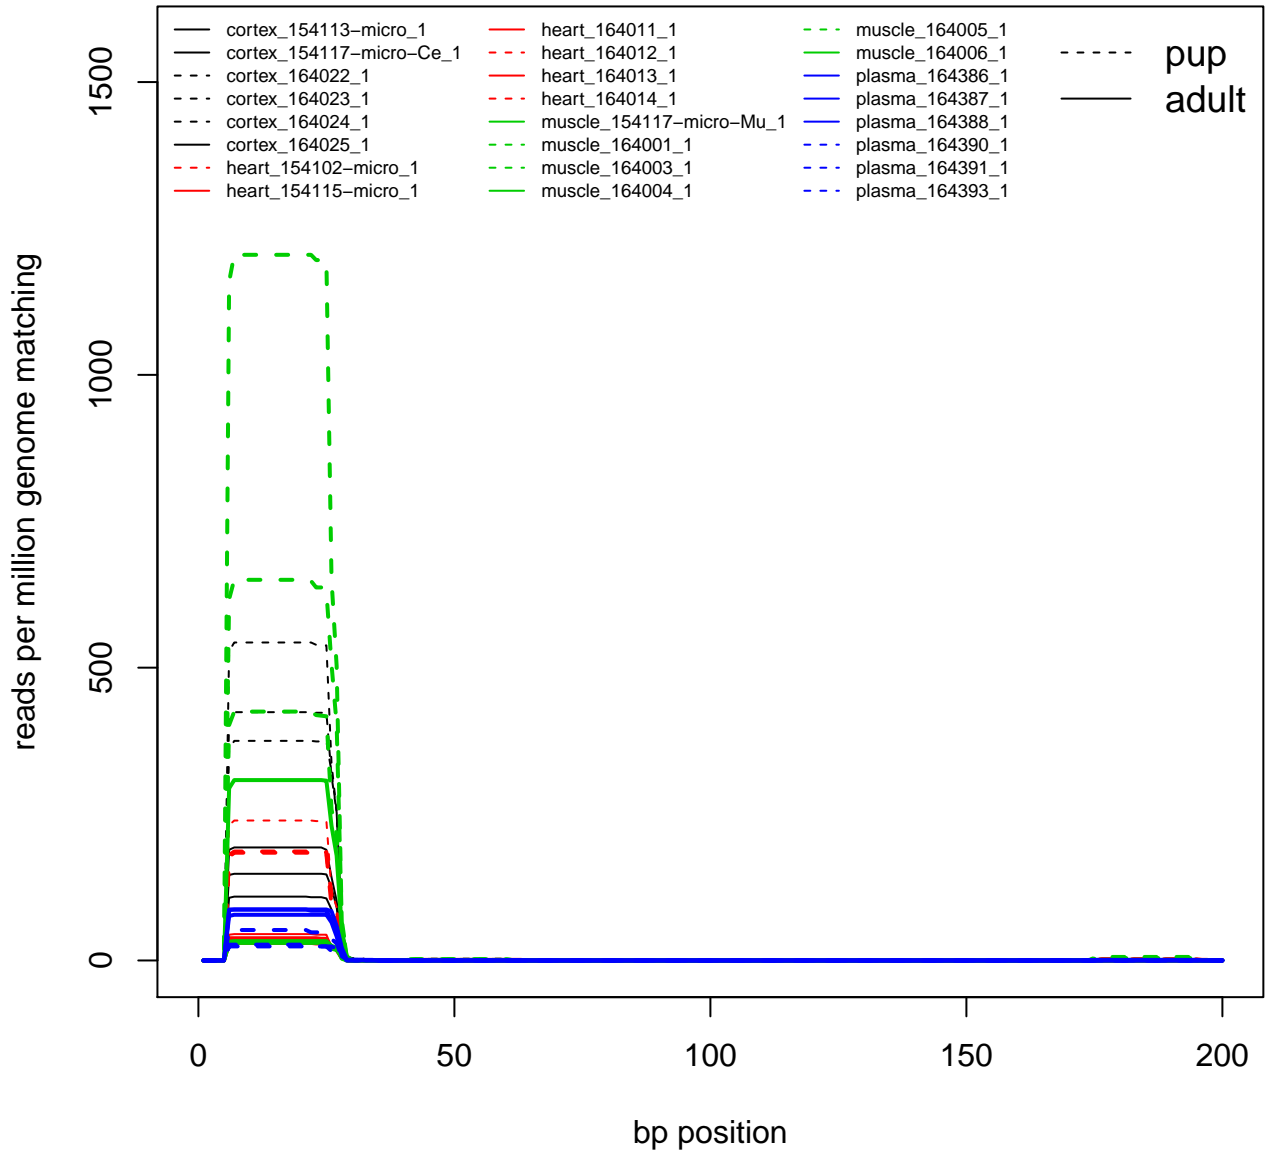

# lwe-miR-450\_loc2

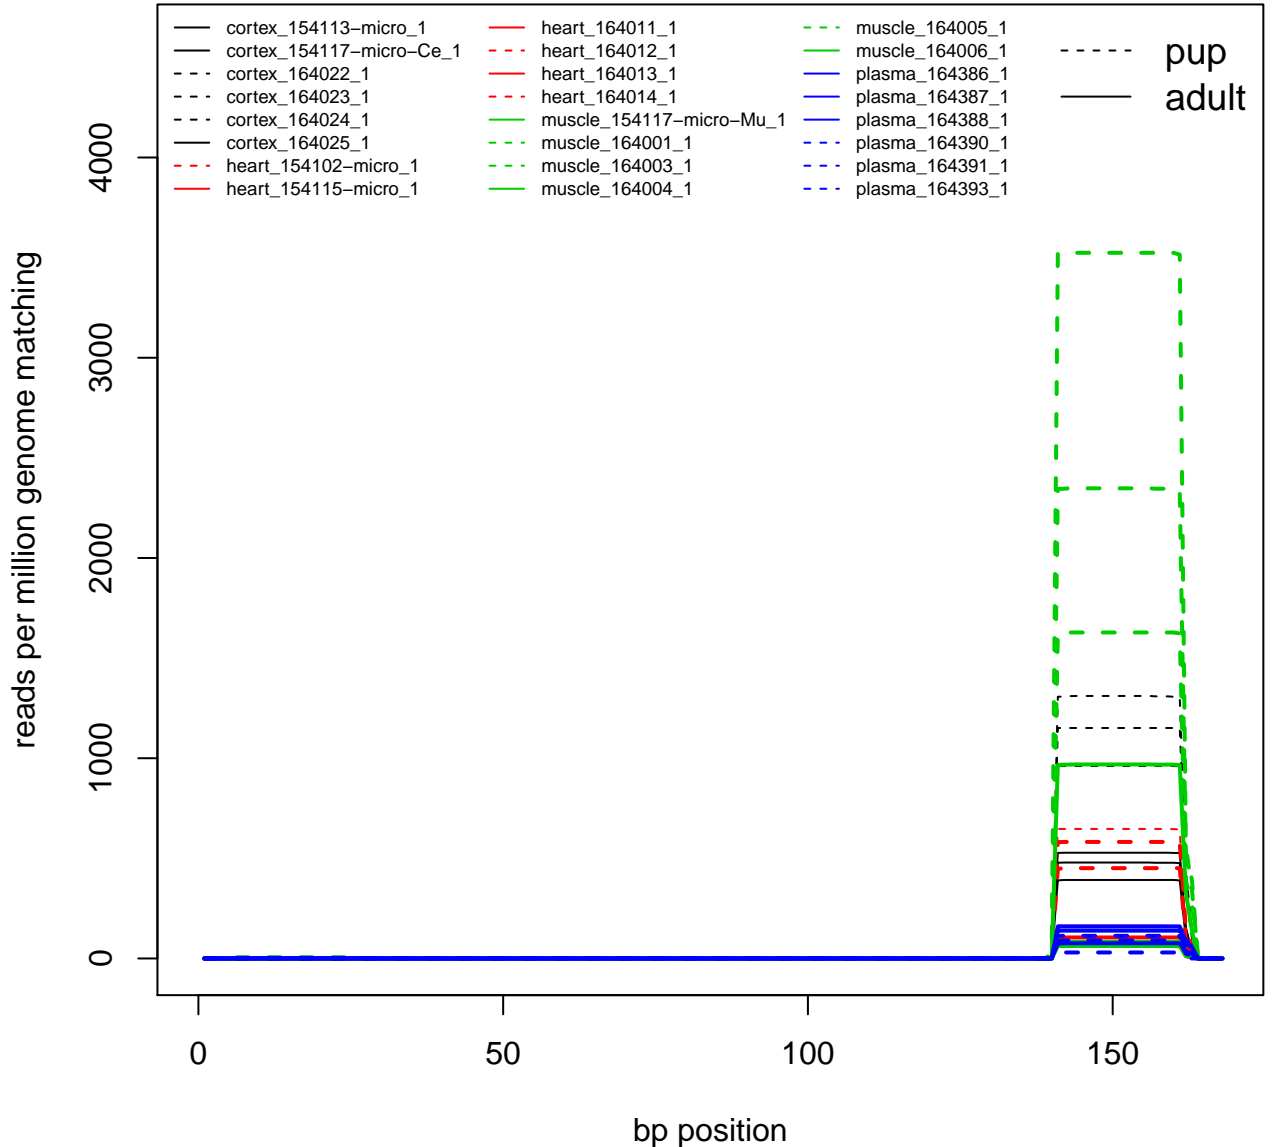

# lwe-miR-106\_loc1

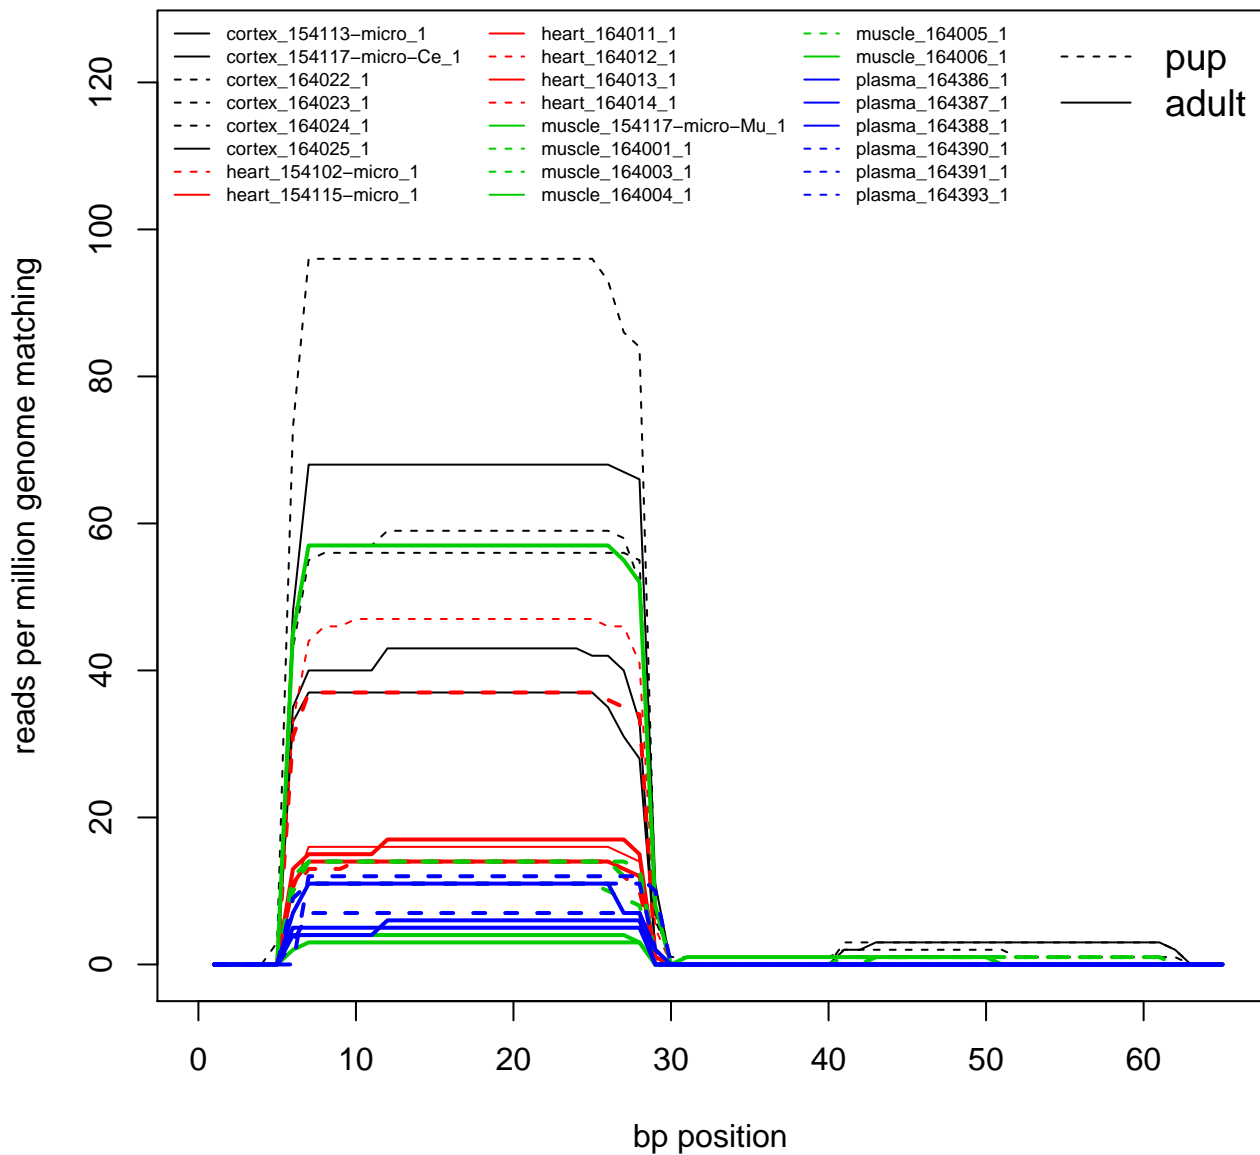

# Iwe-miR-18\_loc1

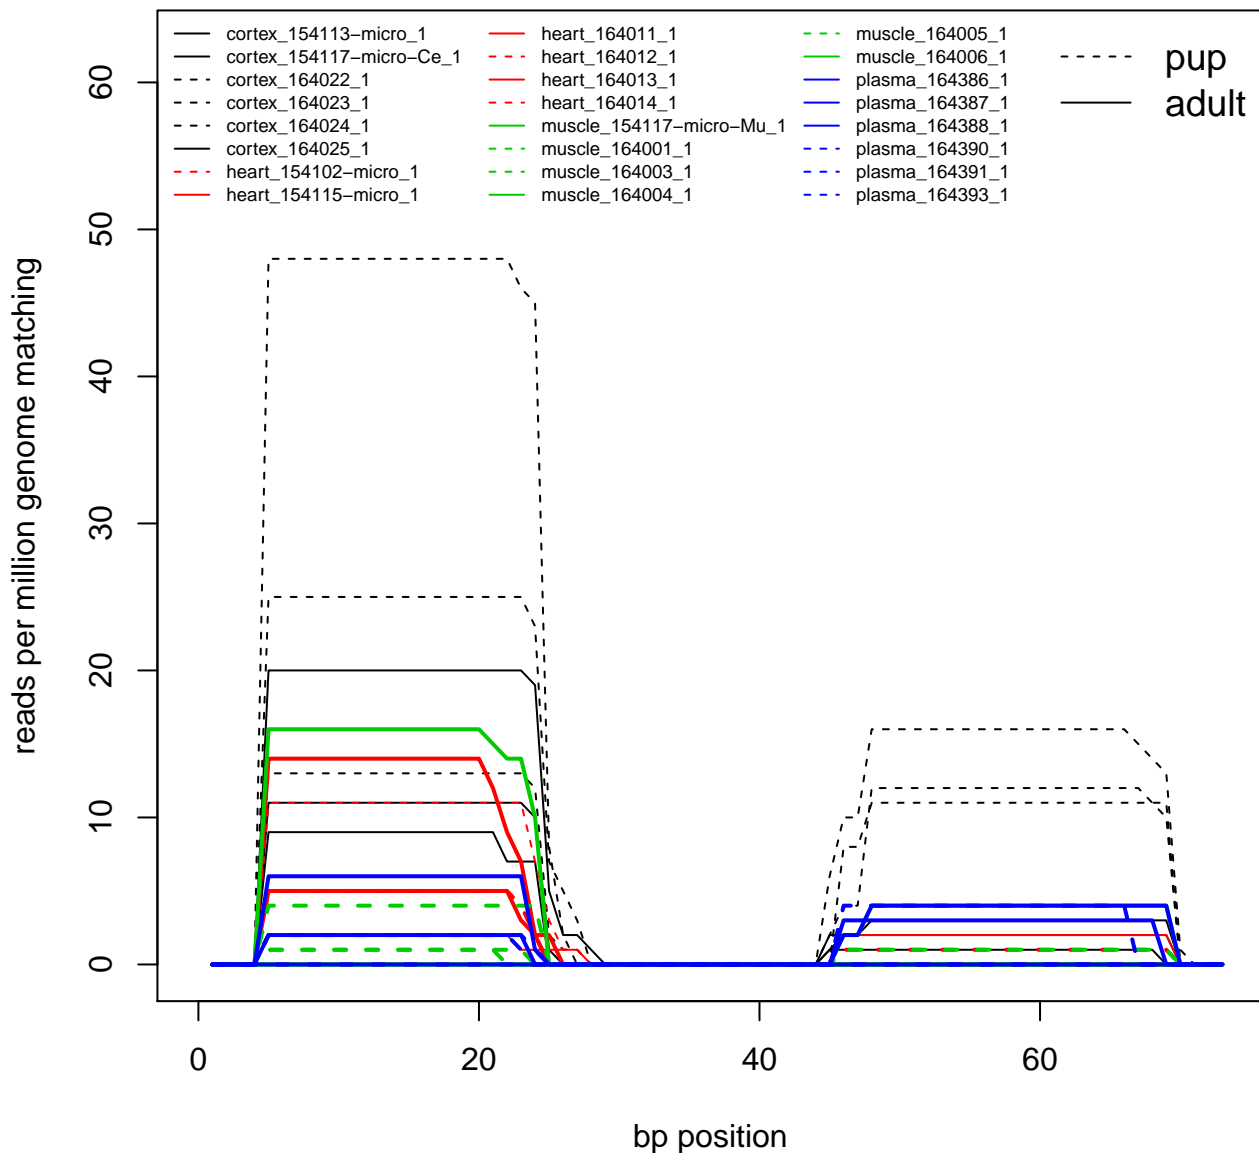

# lwe-miR-20b\_loc1

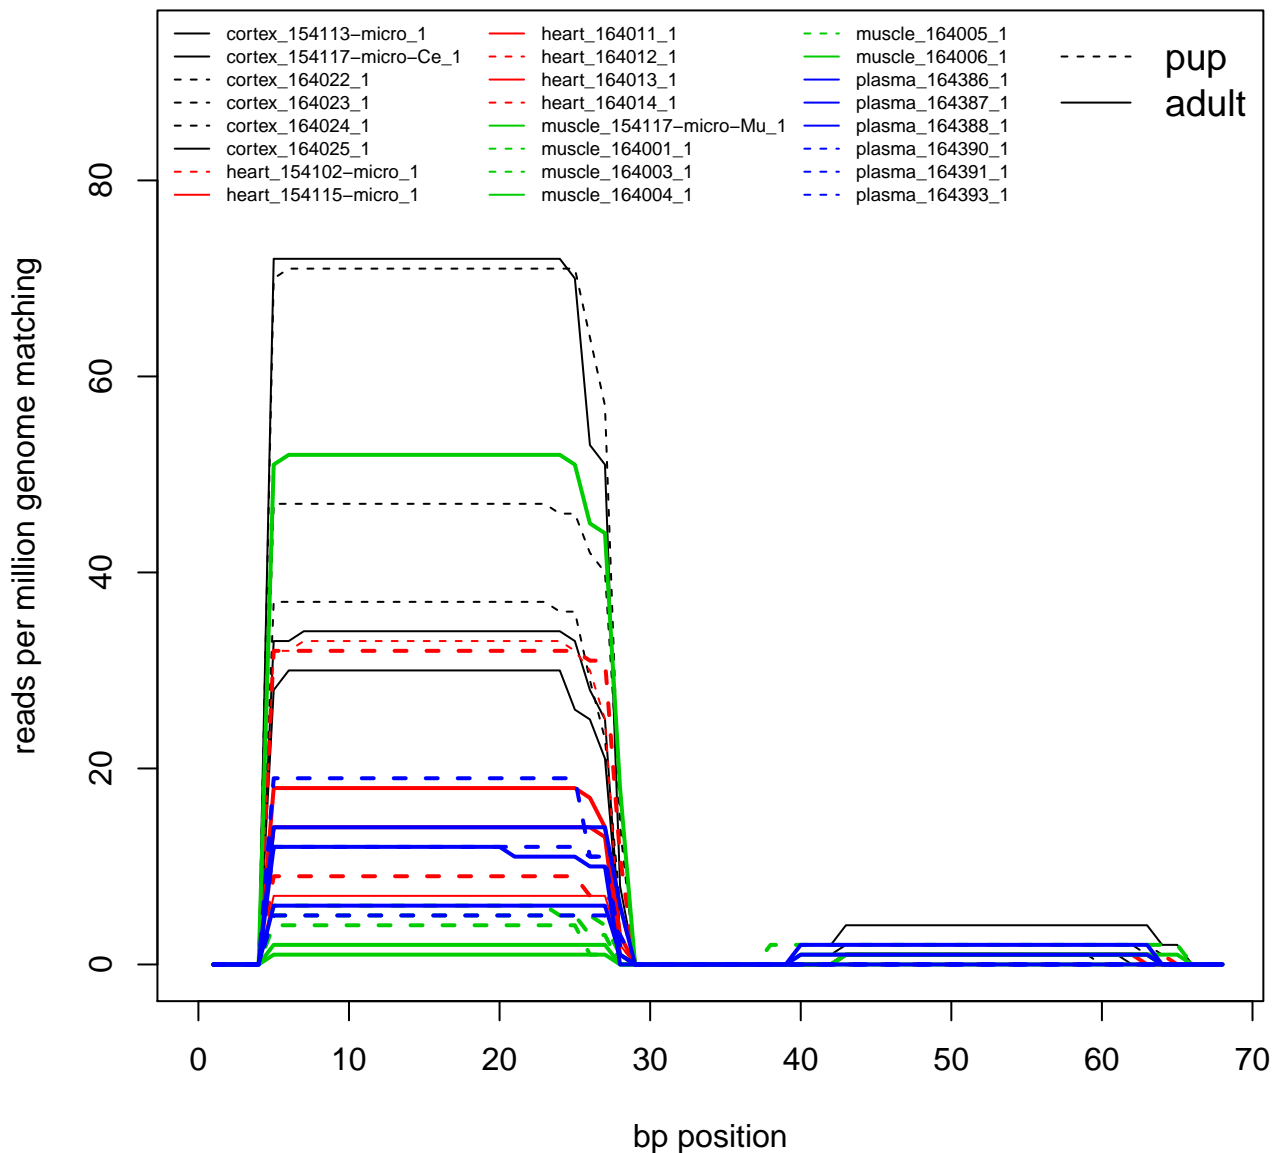

# lwe-miR-19\_loc2

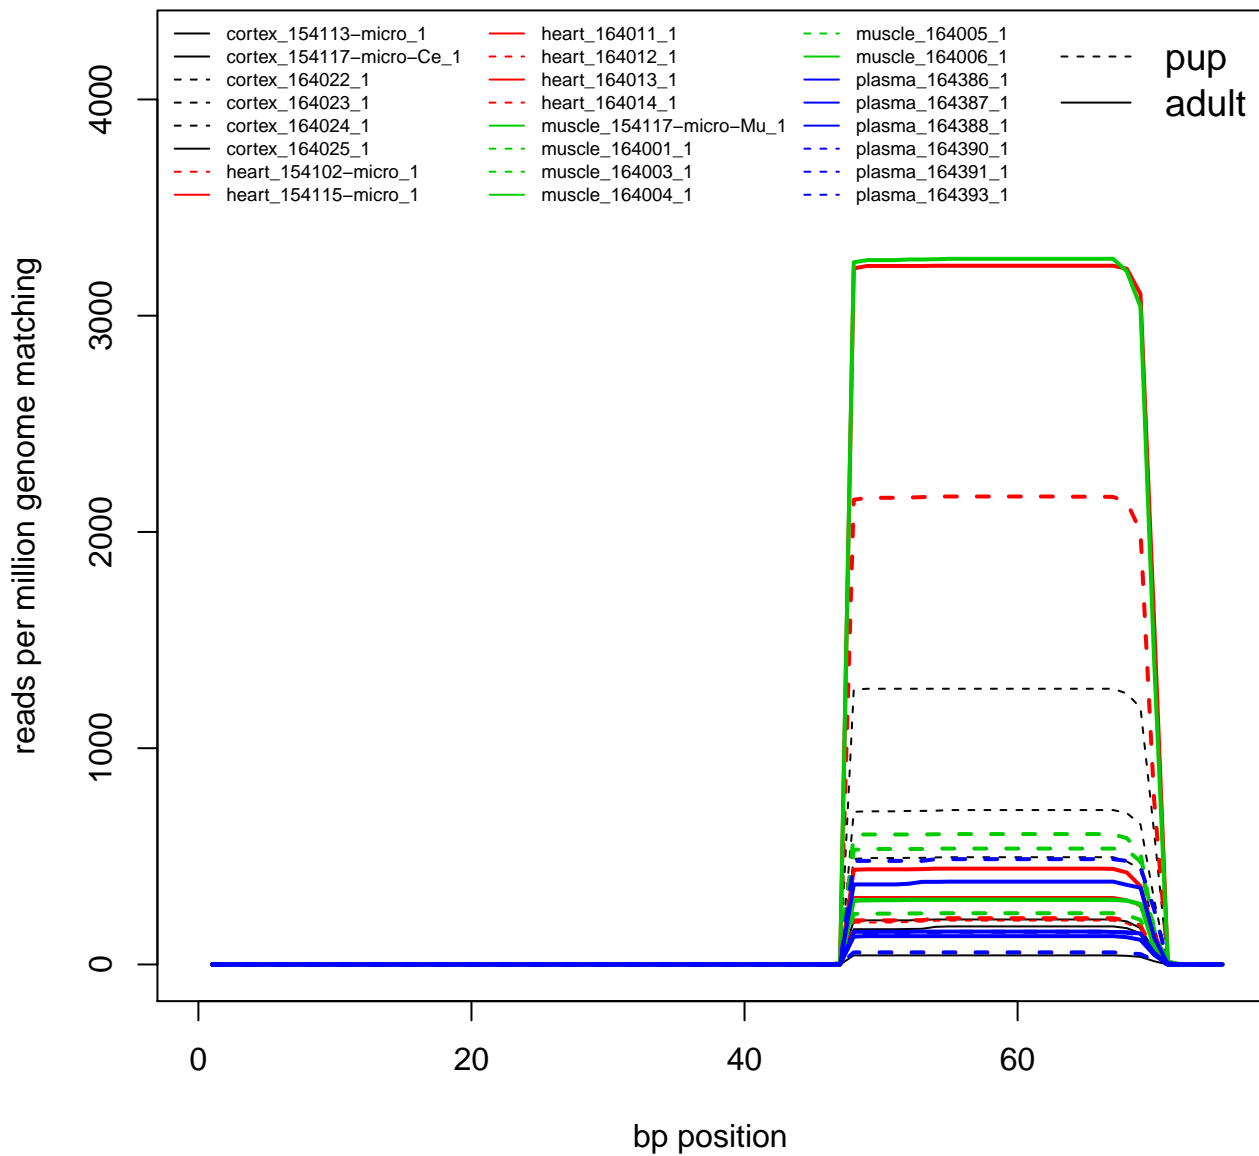

# lwe-miR-92\_loc1

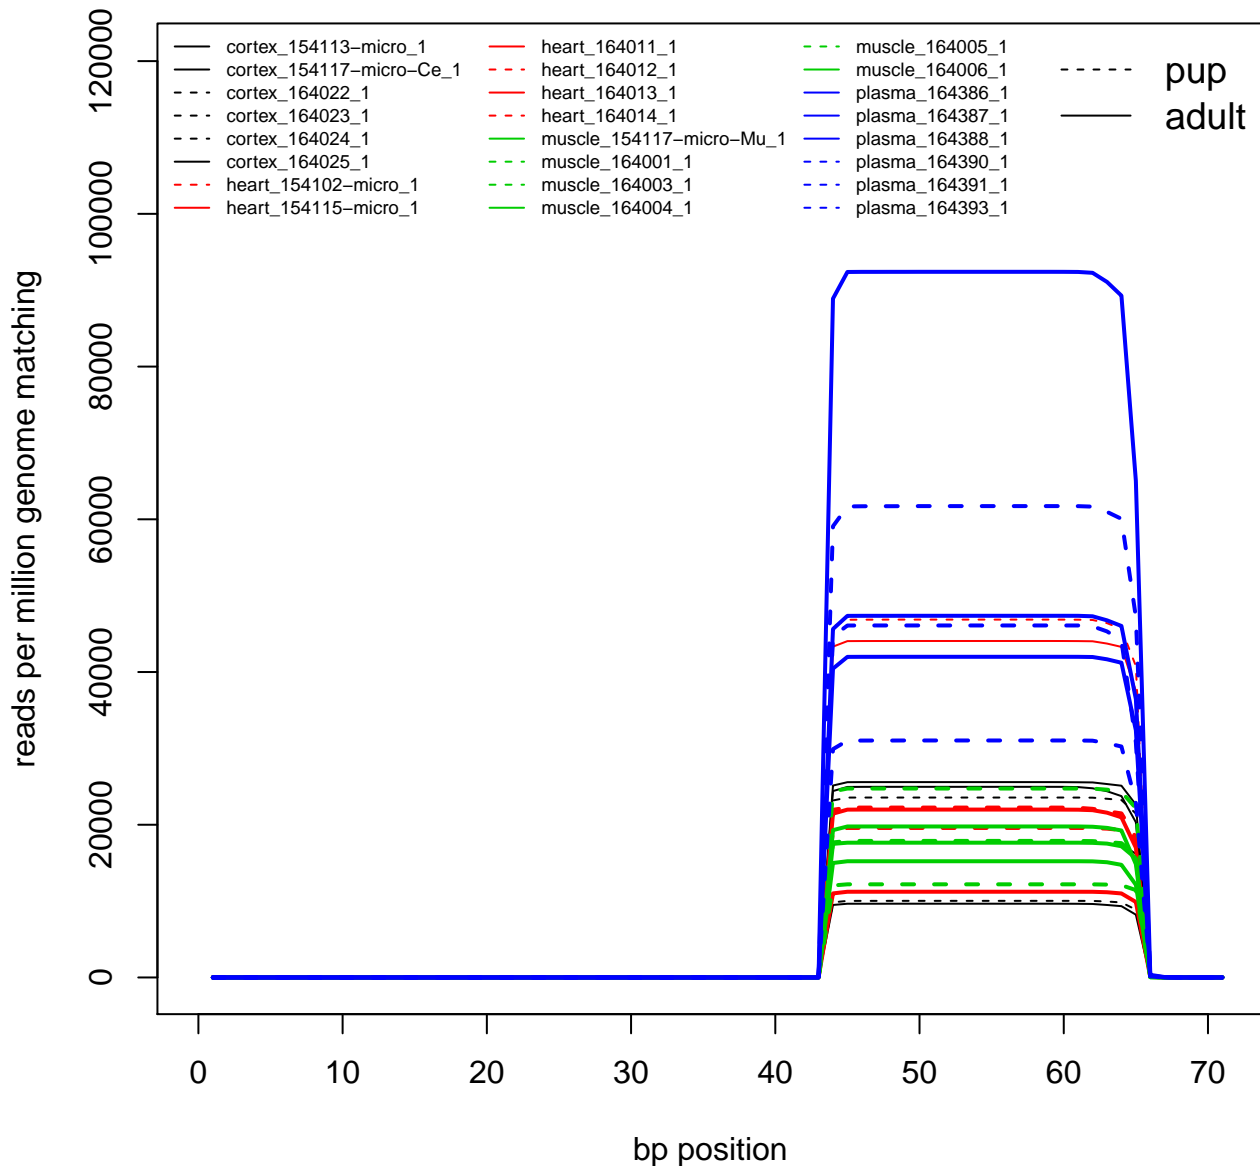

# lwe-miR-363\_loc1

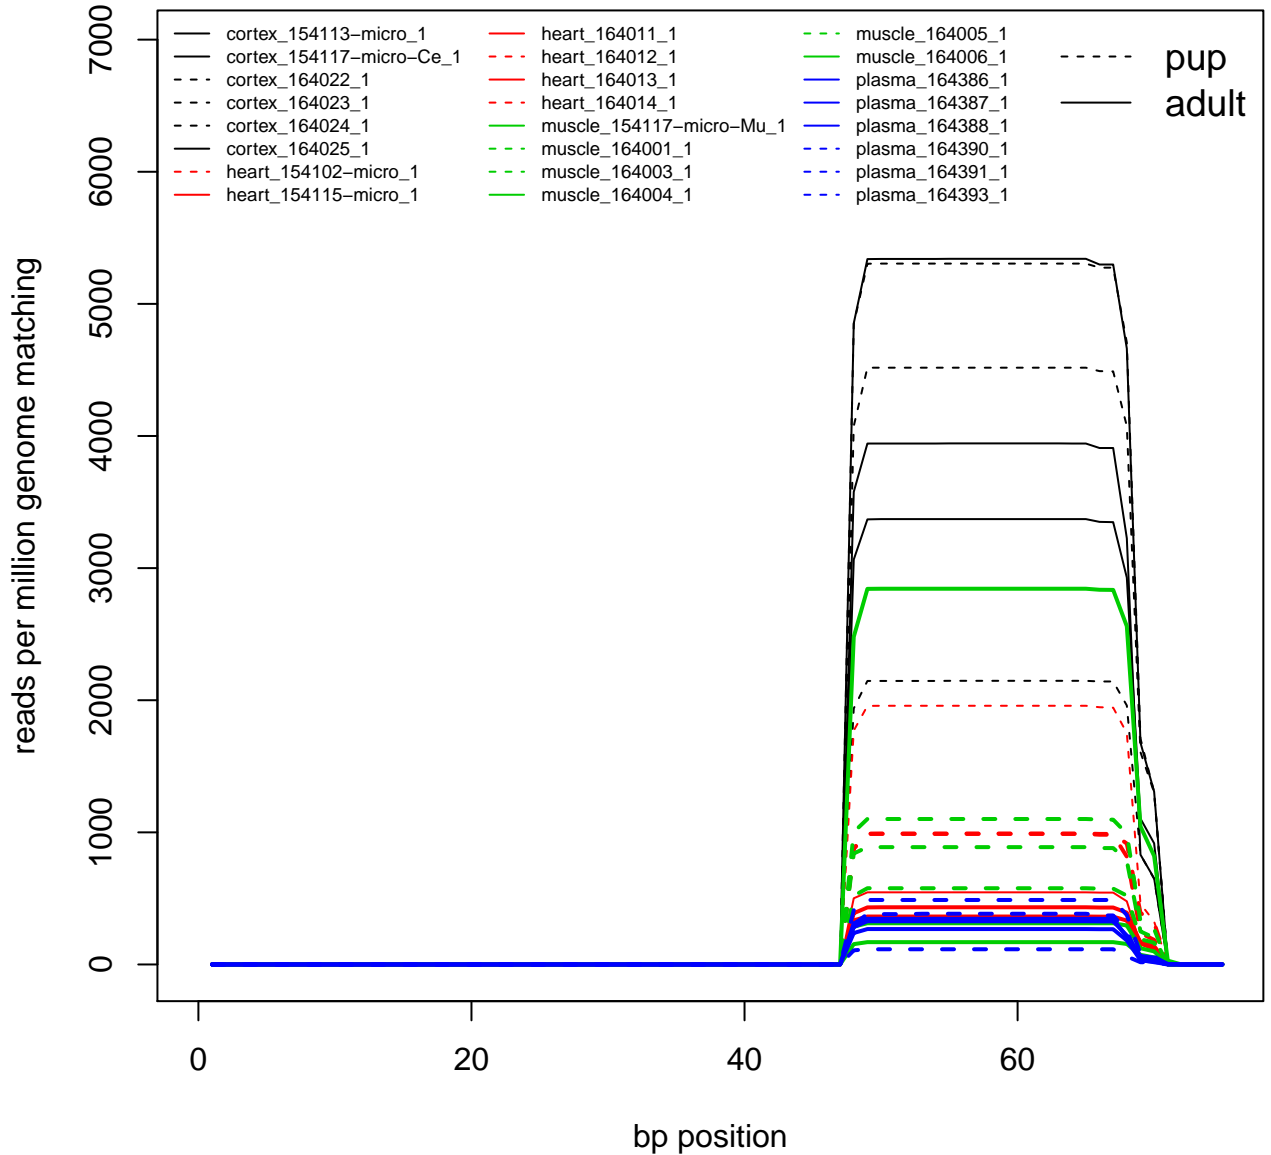



# lwe-miR-215\_loc1

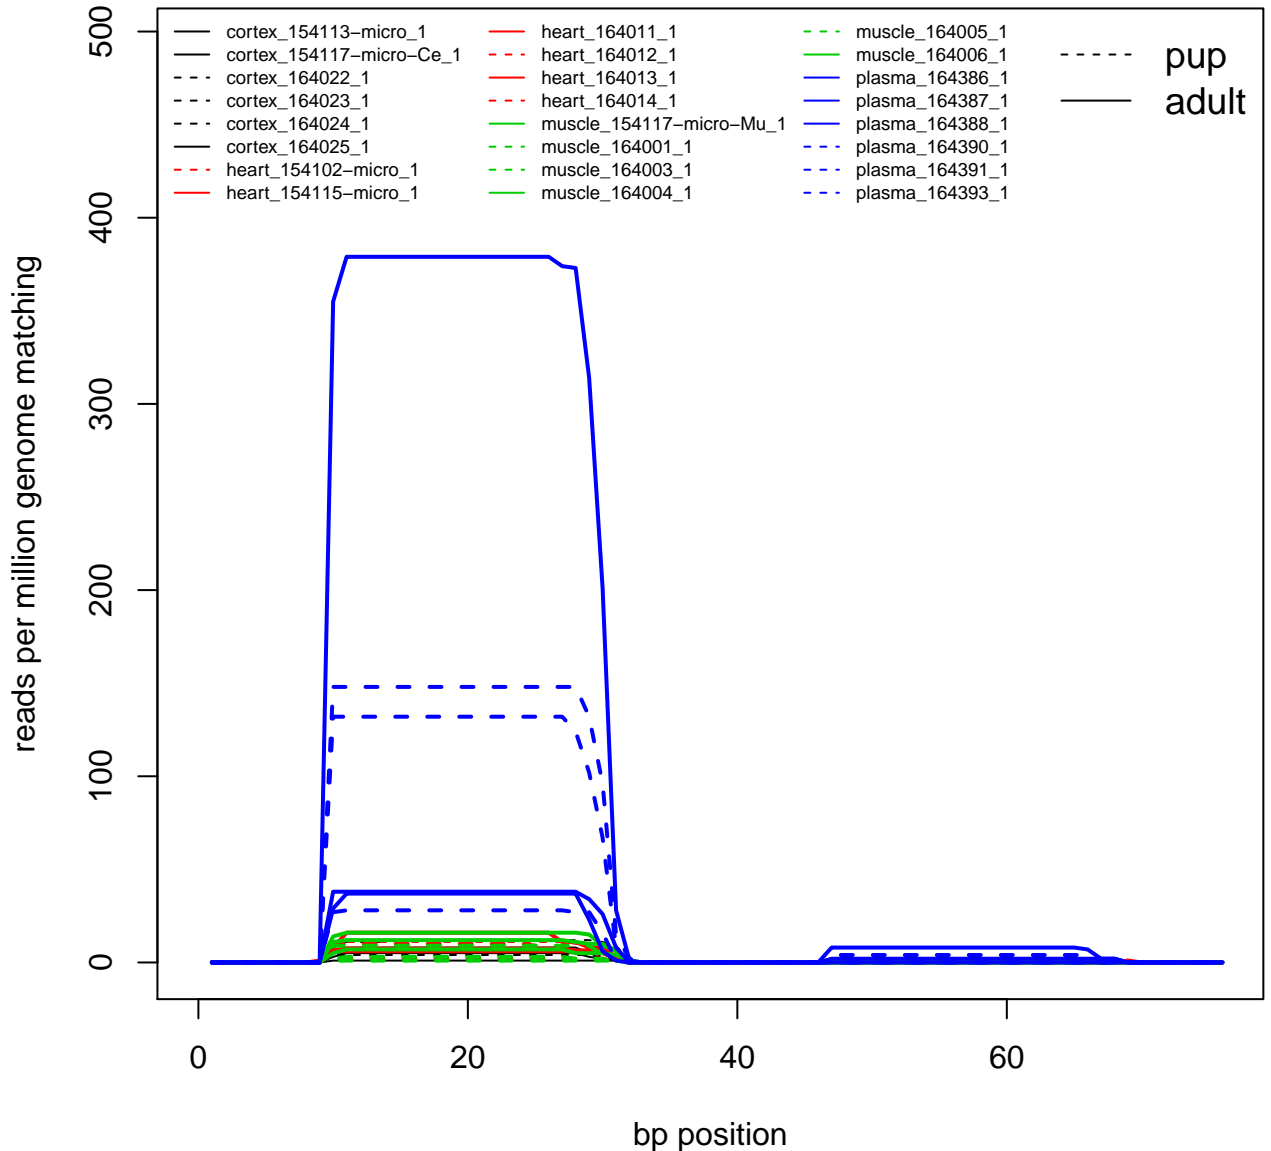

# novel\_97

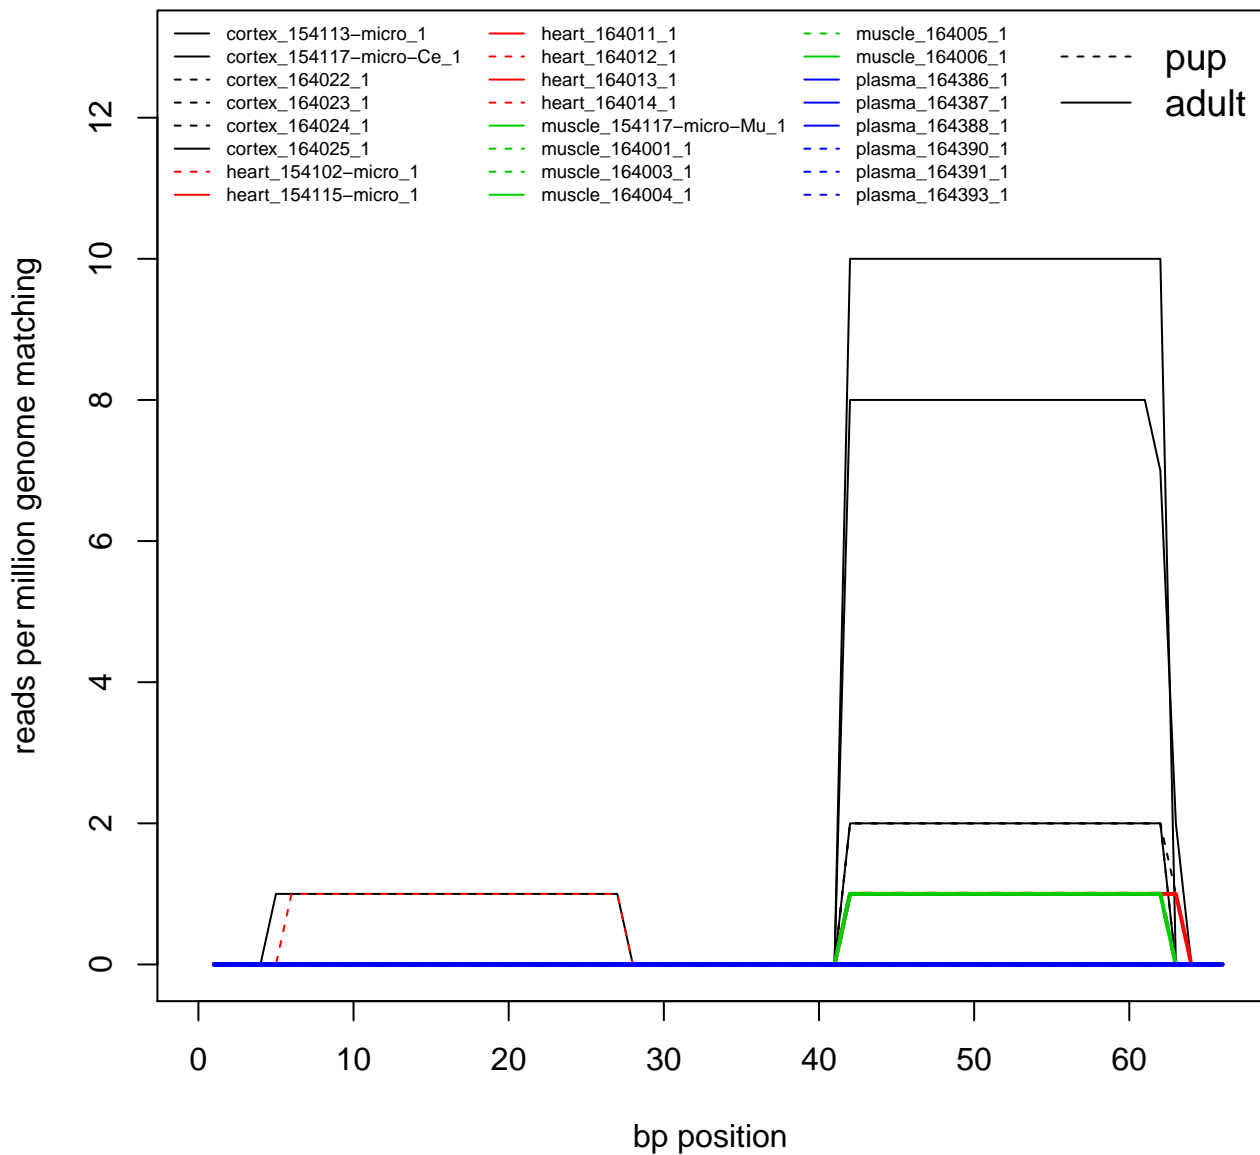

# lwe-miR-664\_loc1

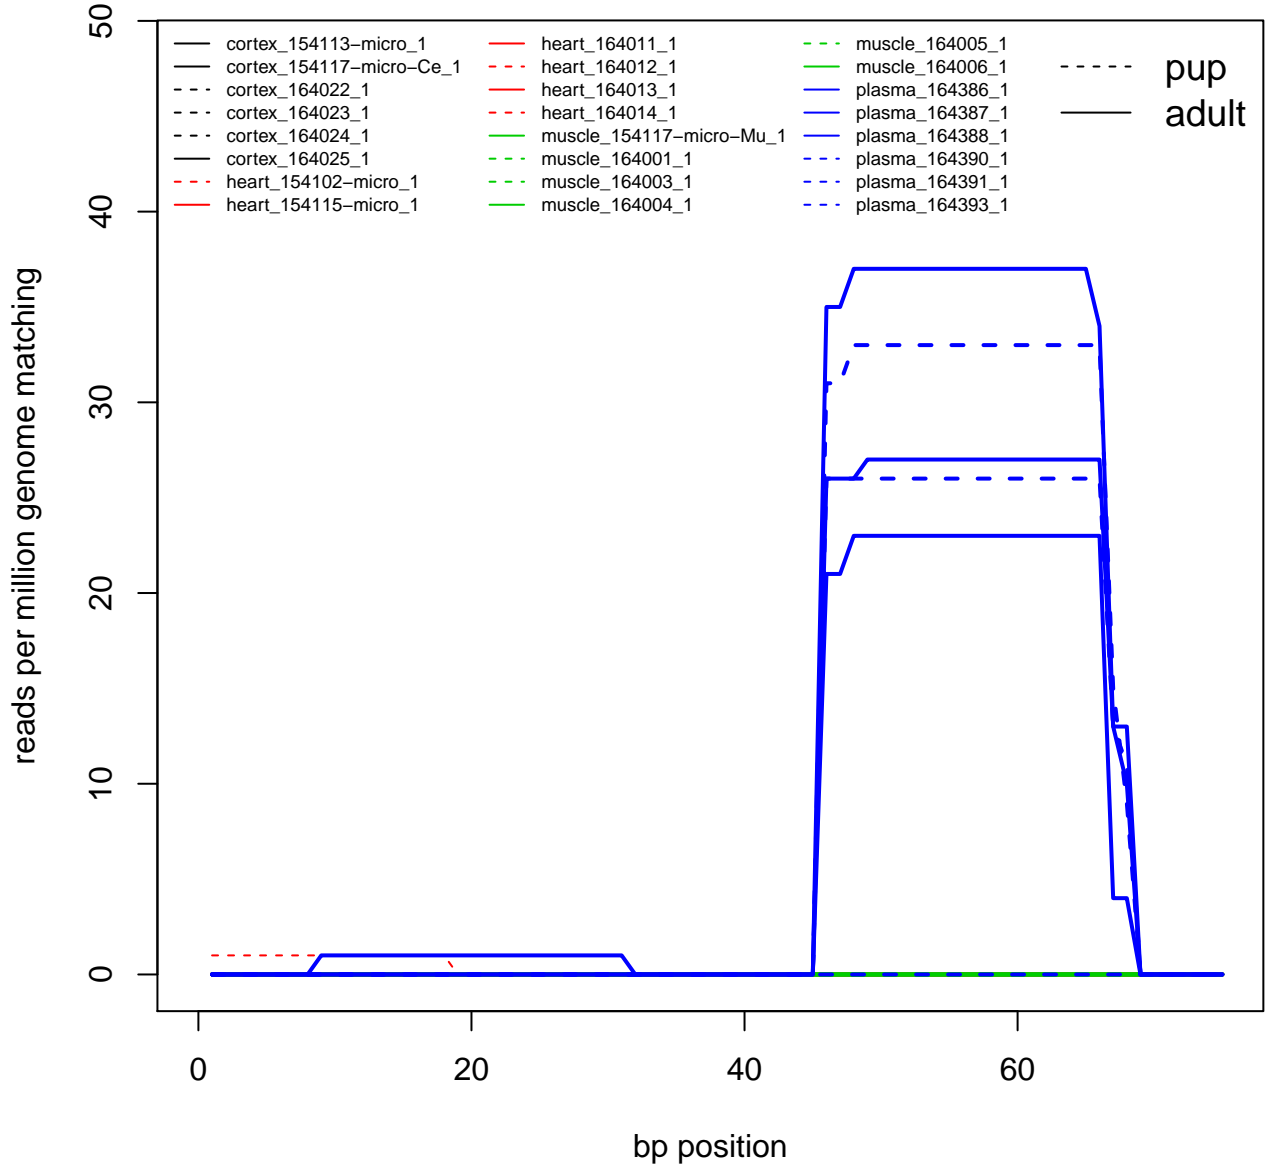

# lwe-miR-181a\_loc2

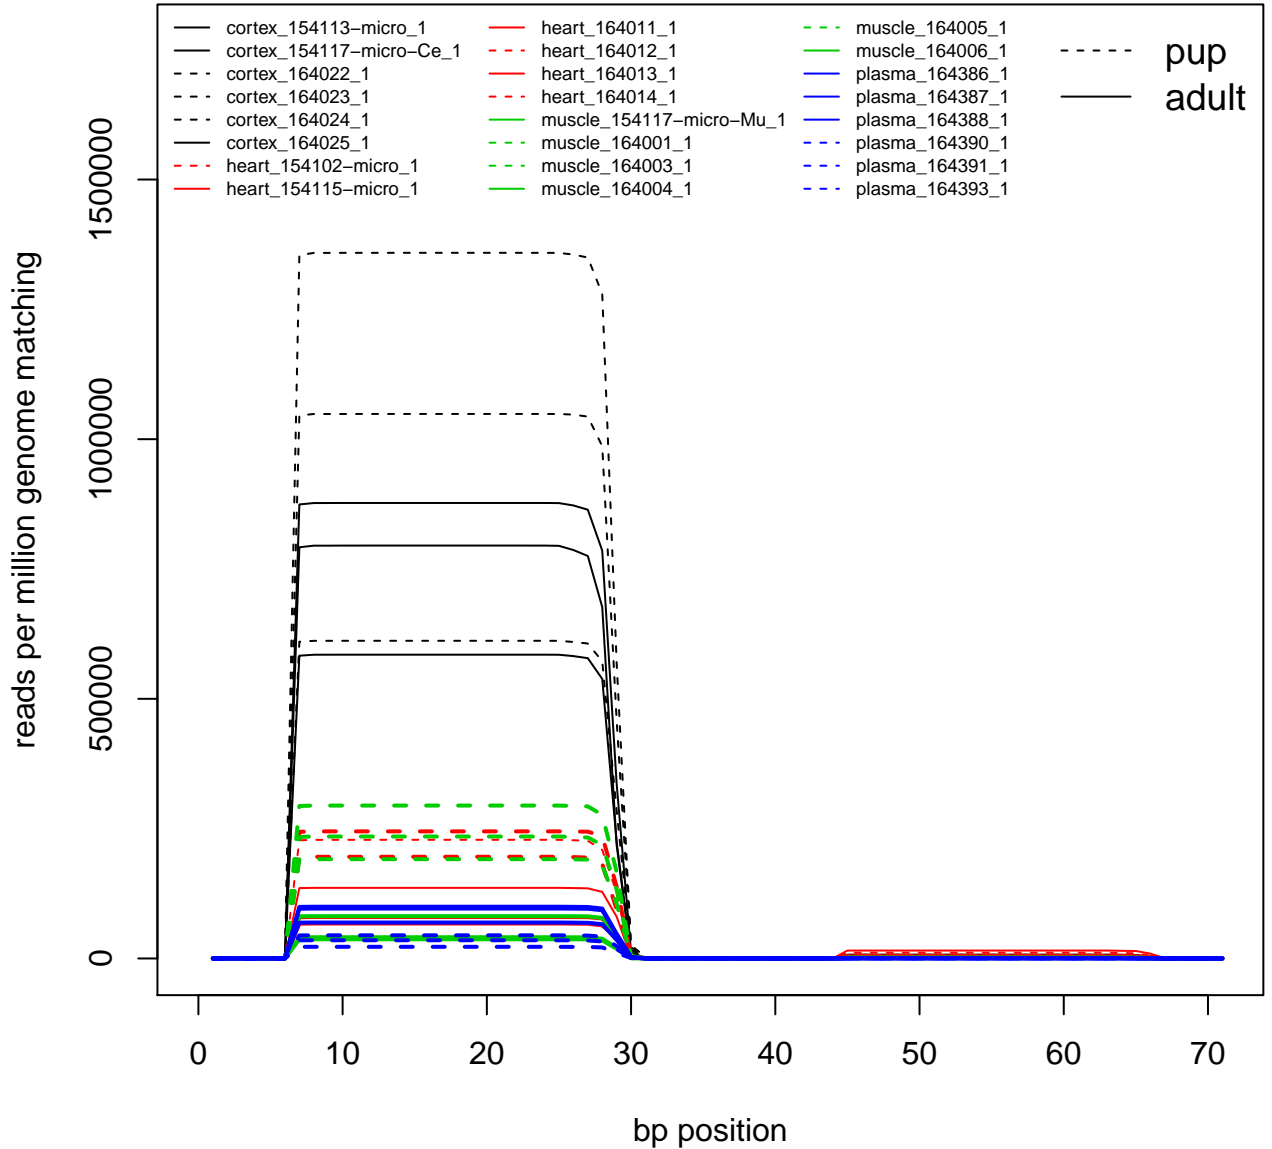

# lwe-miR-181b\_loc2

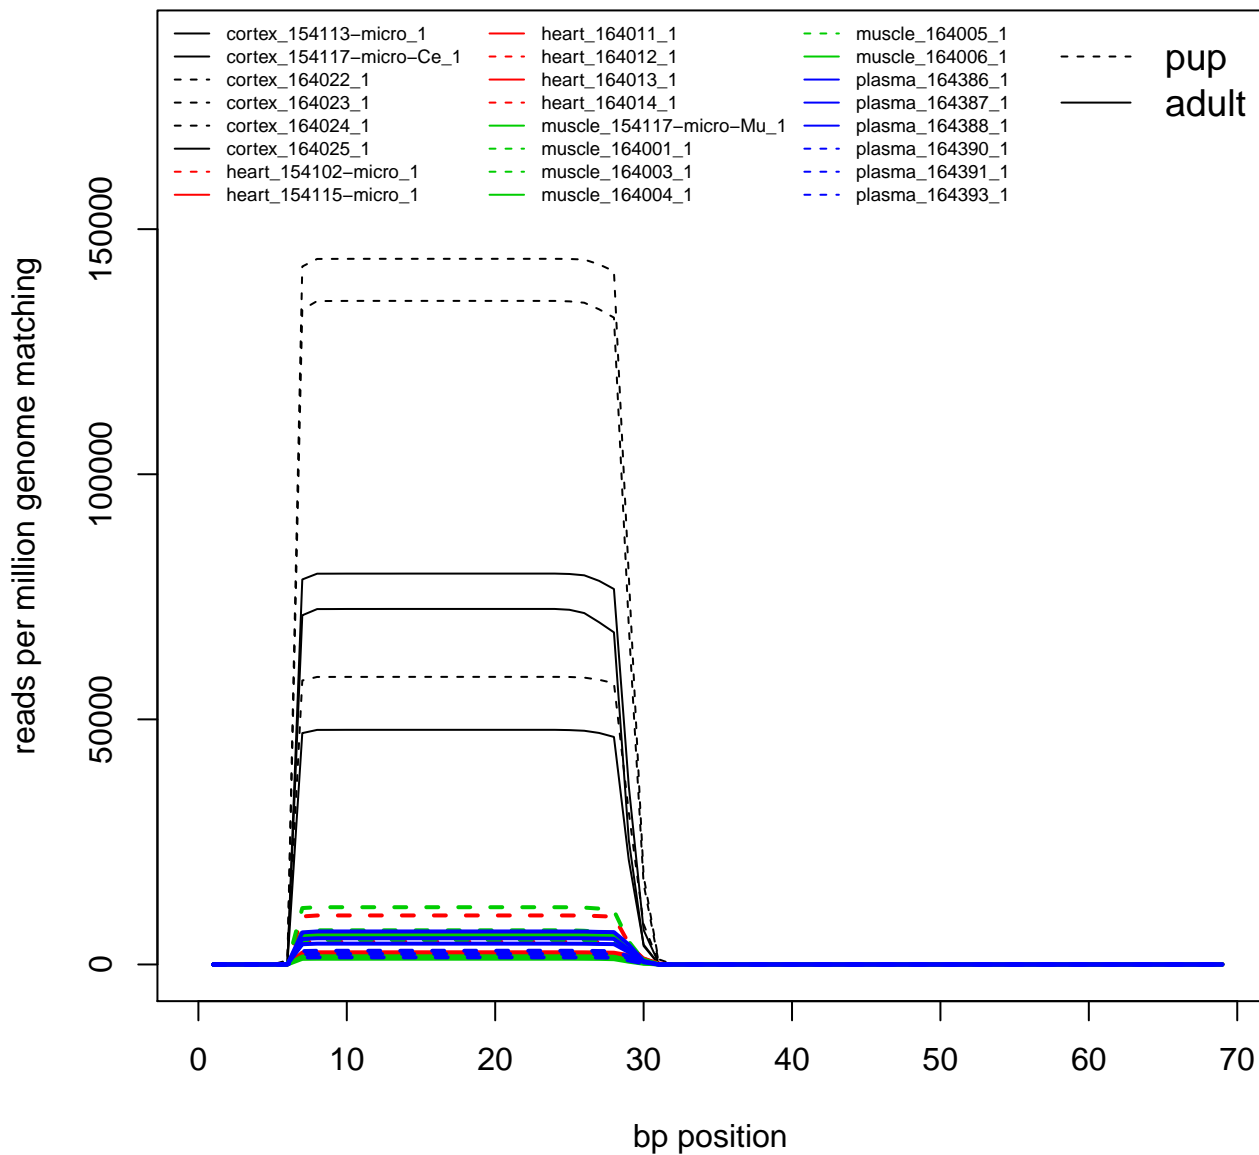

# lwe-miR-126a\_loc1

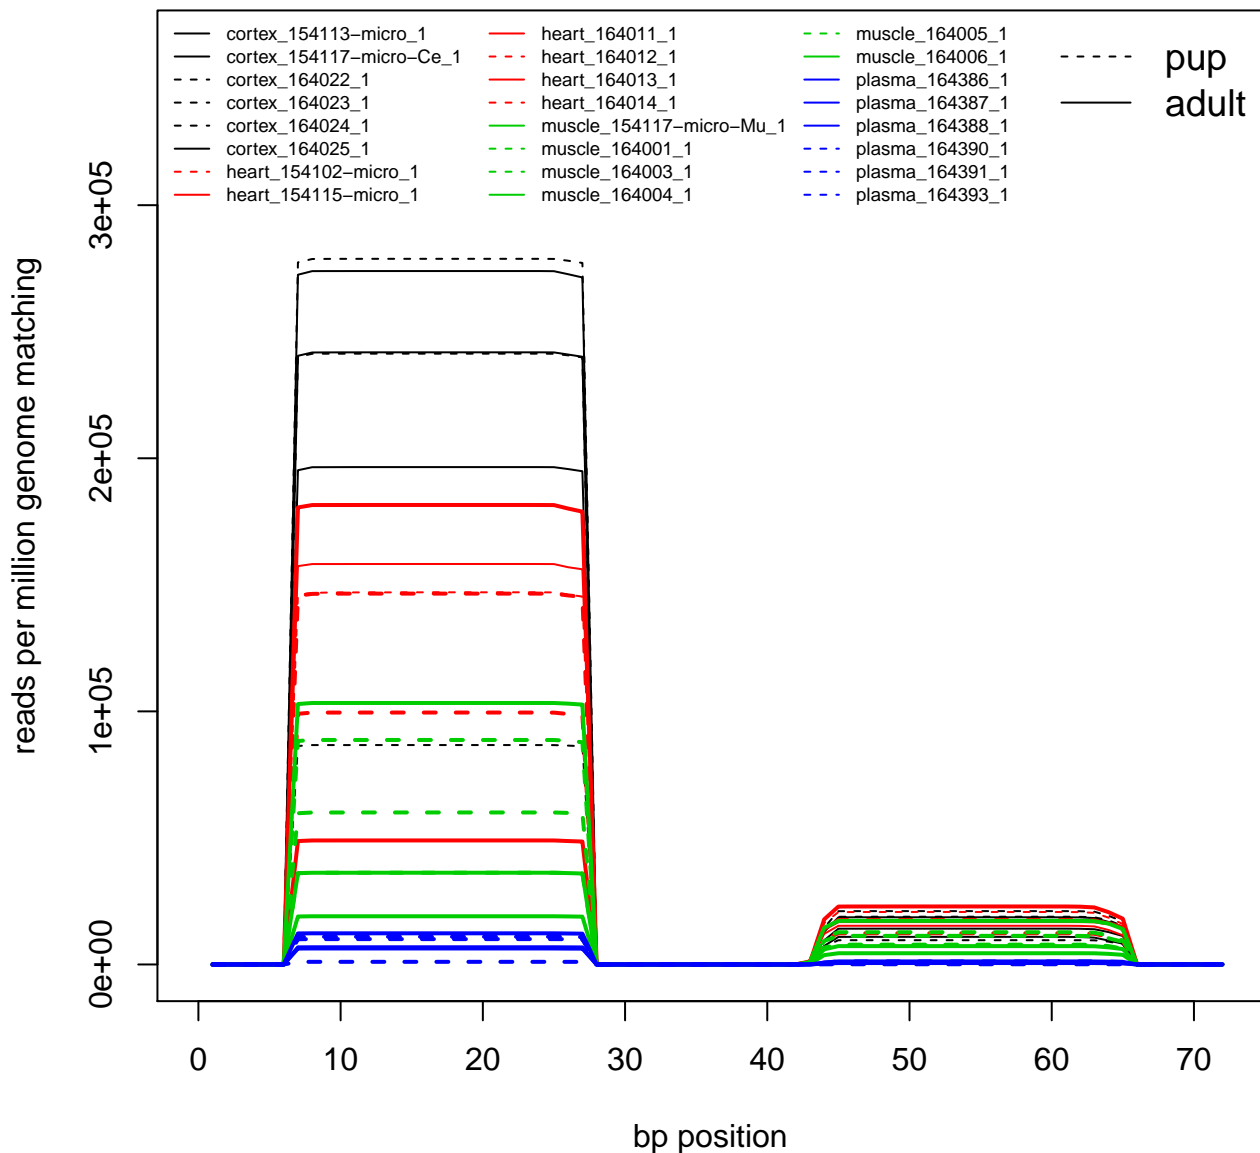

# lwe-miR-1247\_loc1

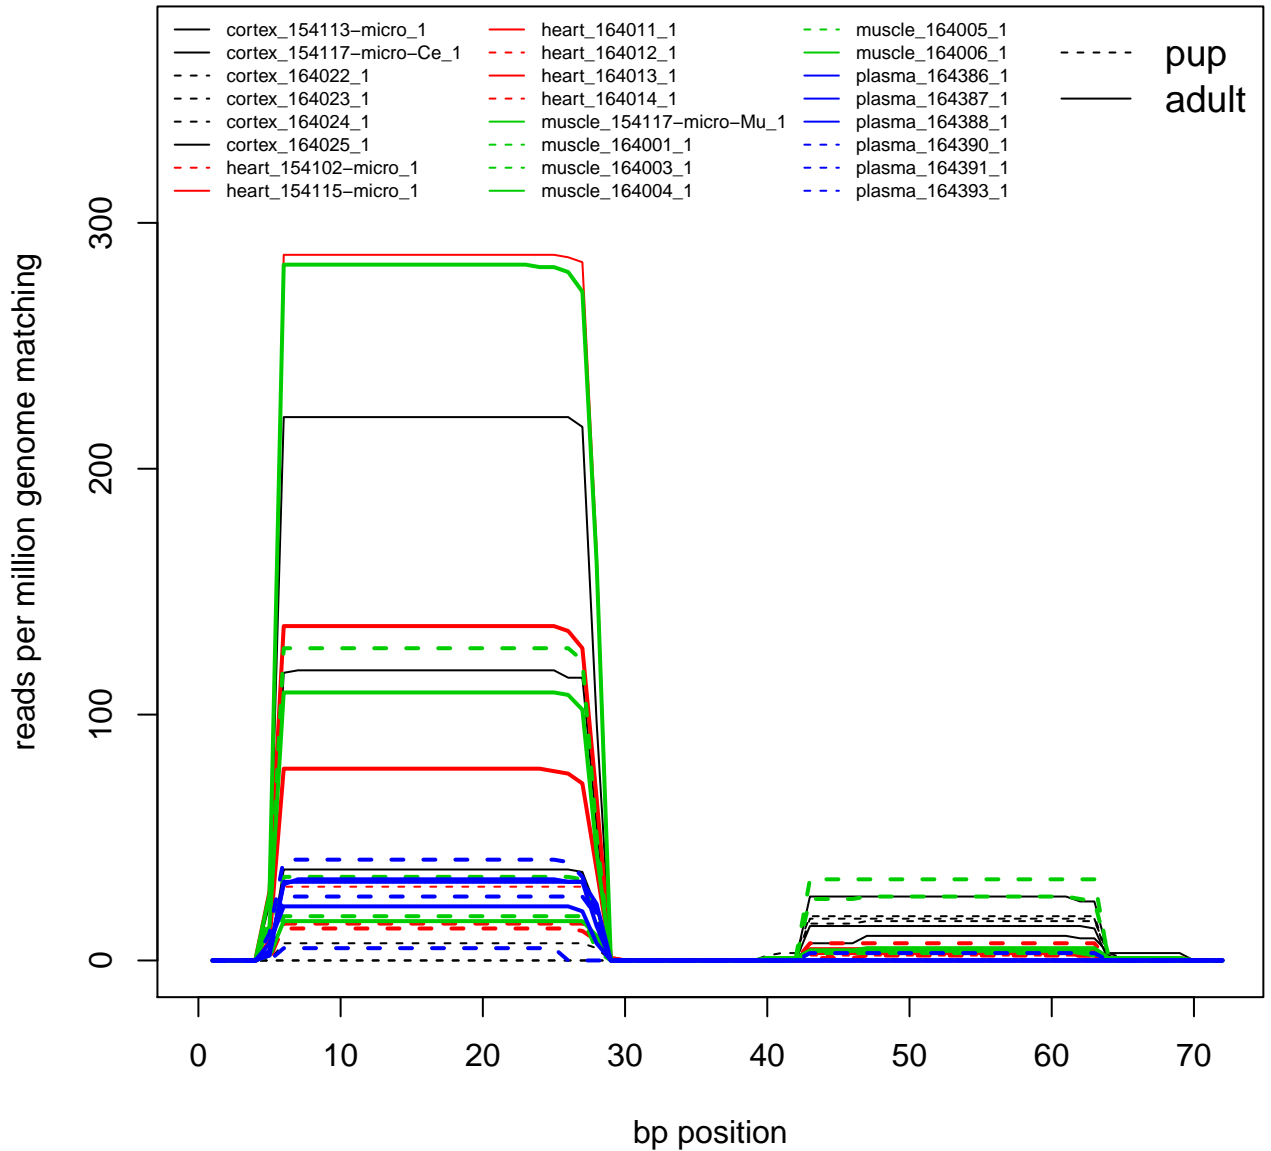





# novel\_98

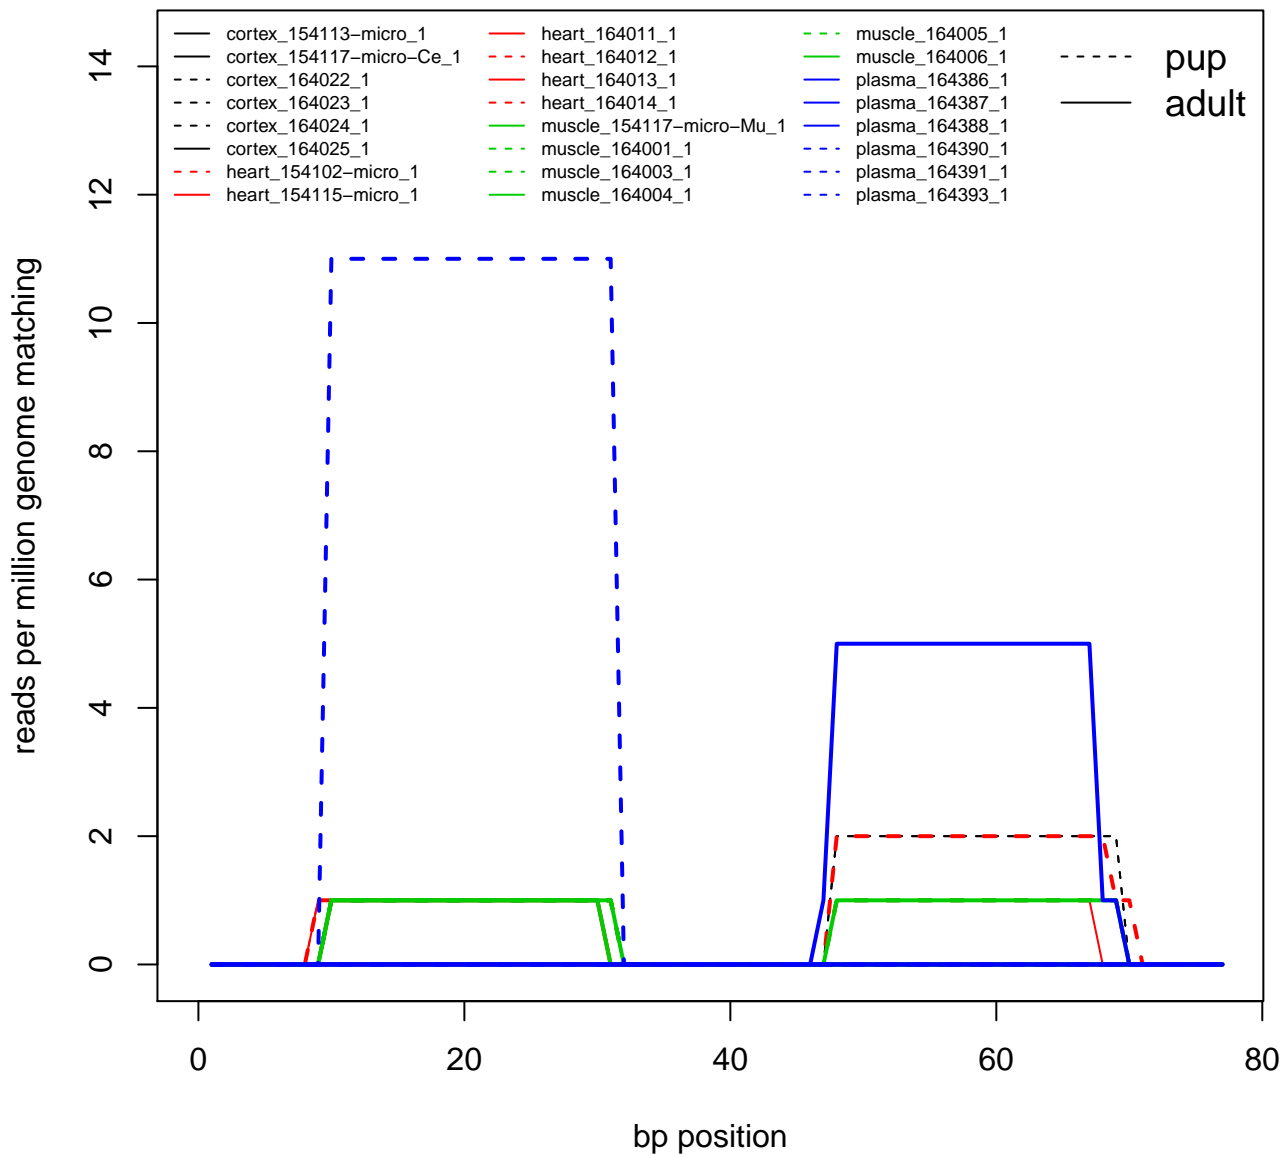



# lwe-miR-31a\_loc1

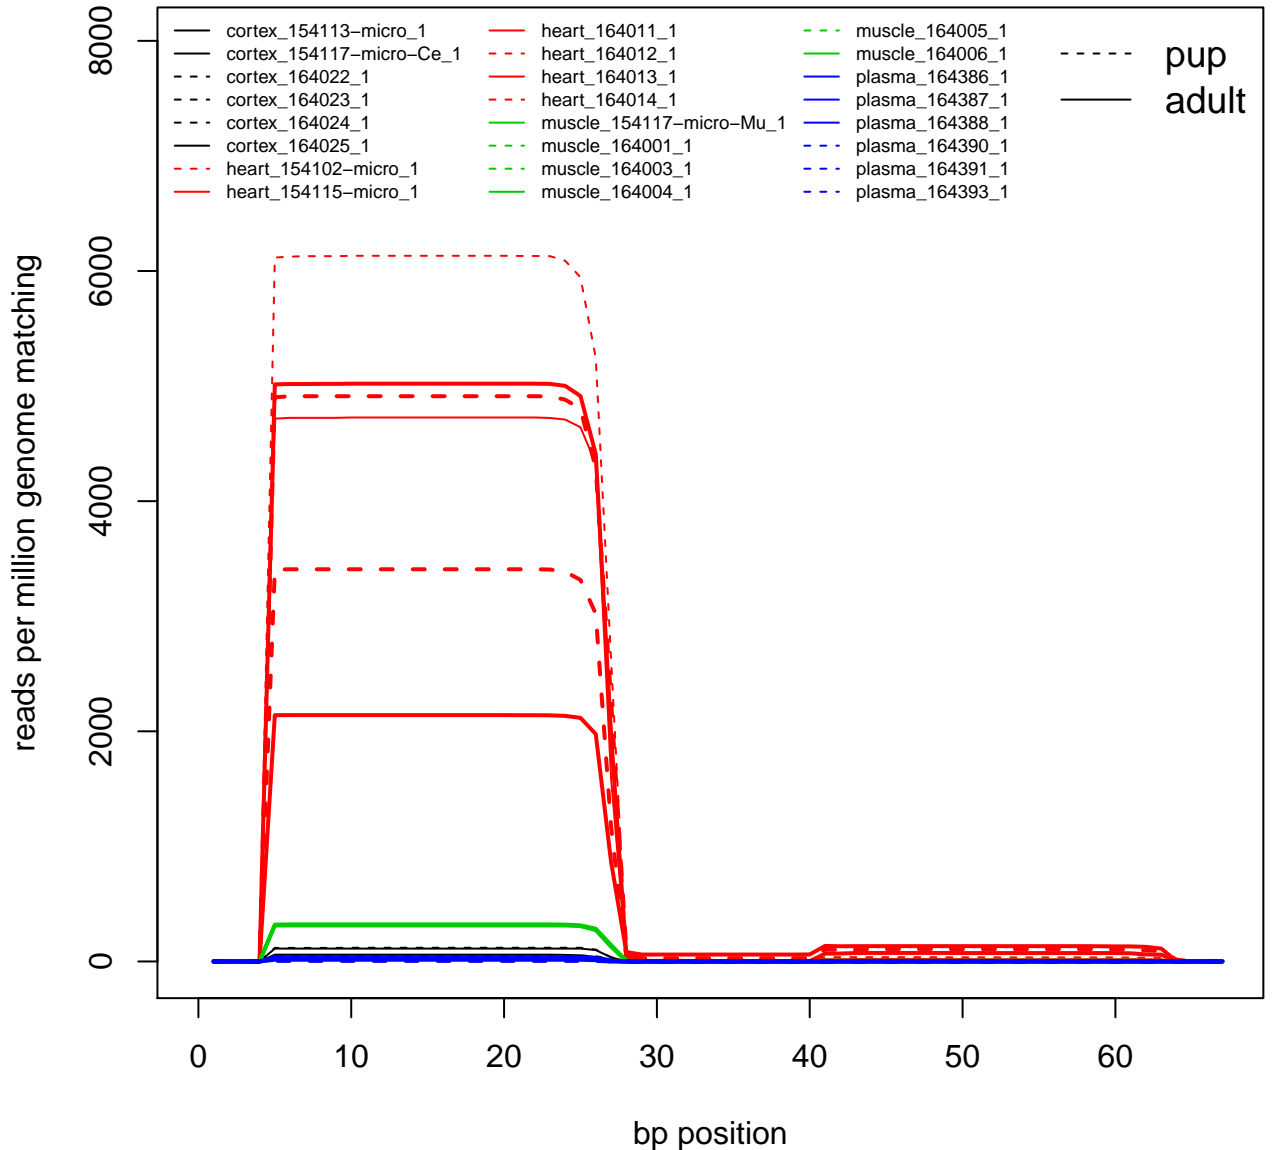

# lwe-miR-504\_loc1

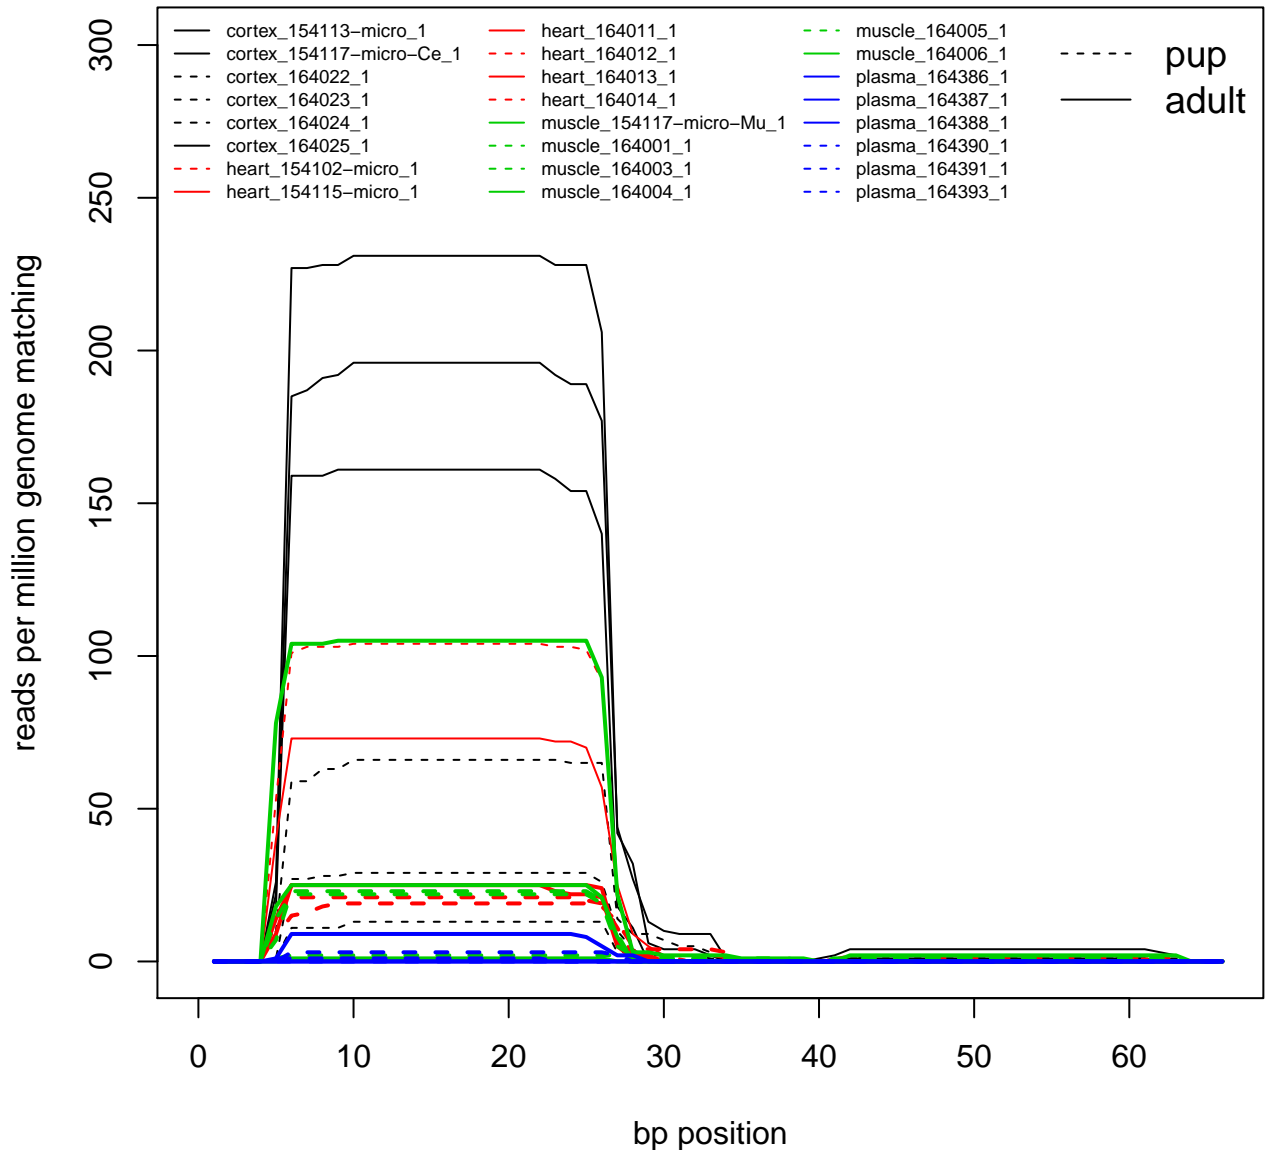

# lwe-miR-138\_loc2

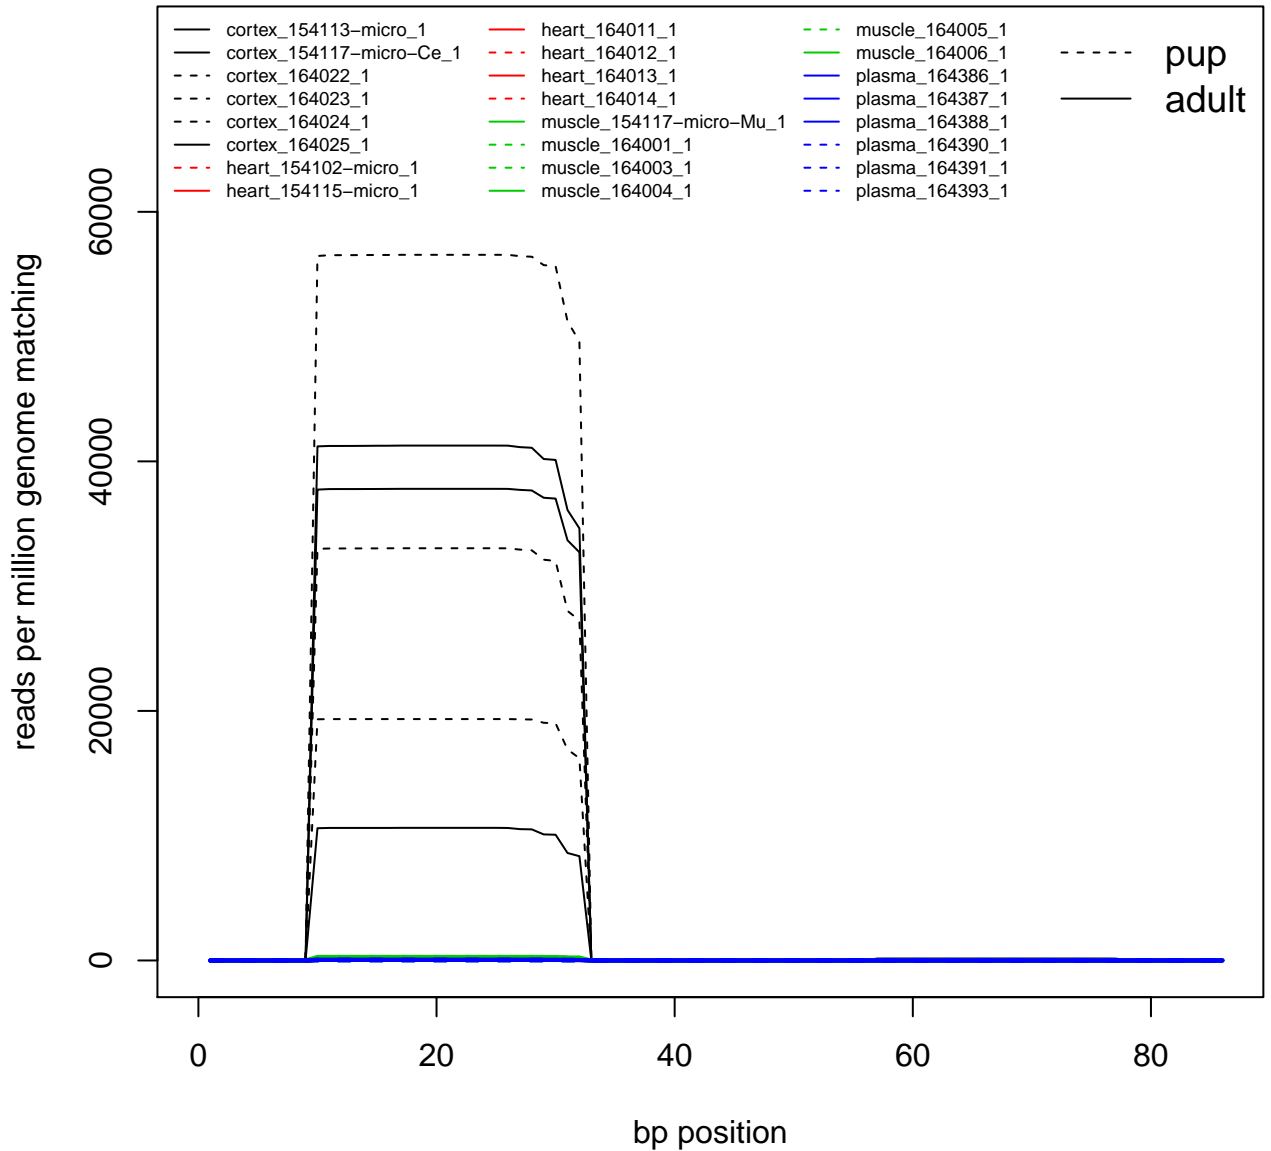

# novel\_99

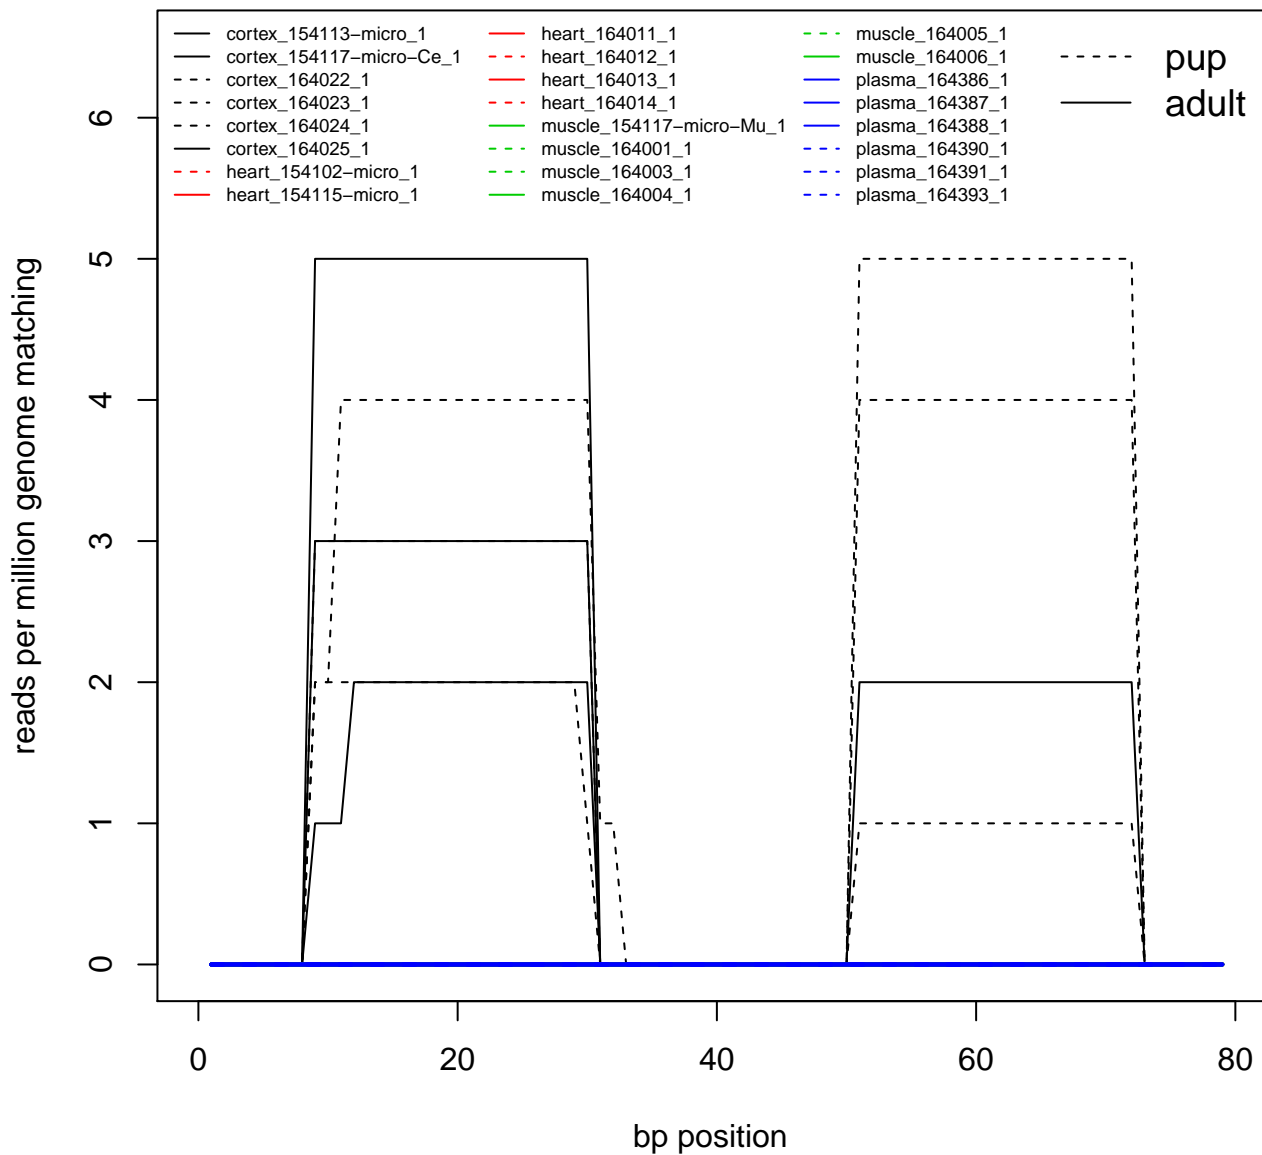



# novel\_100

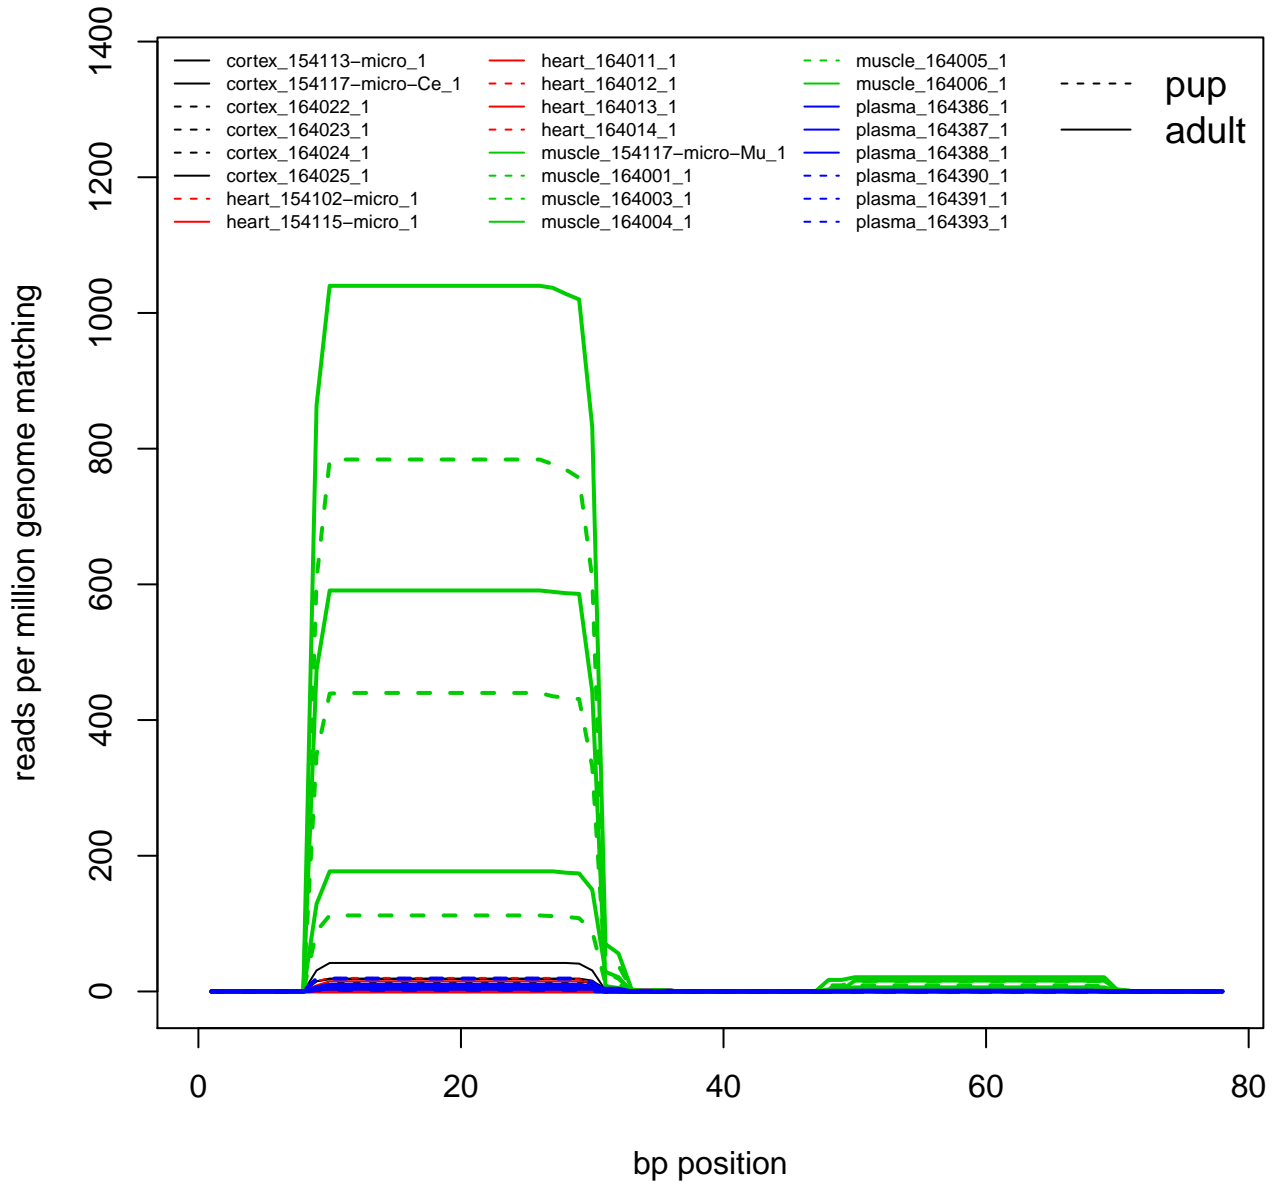





# lwe-miR-101a\_loc1

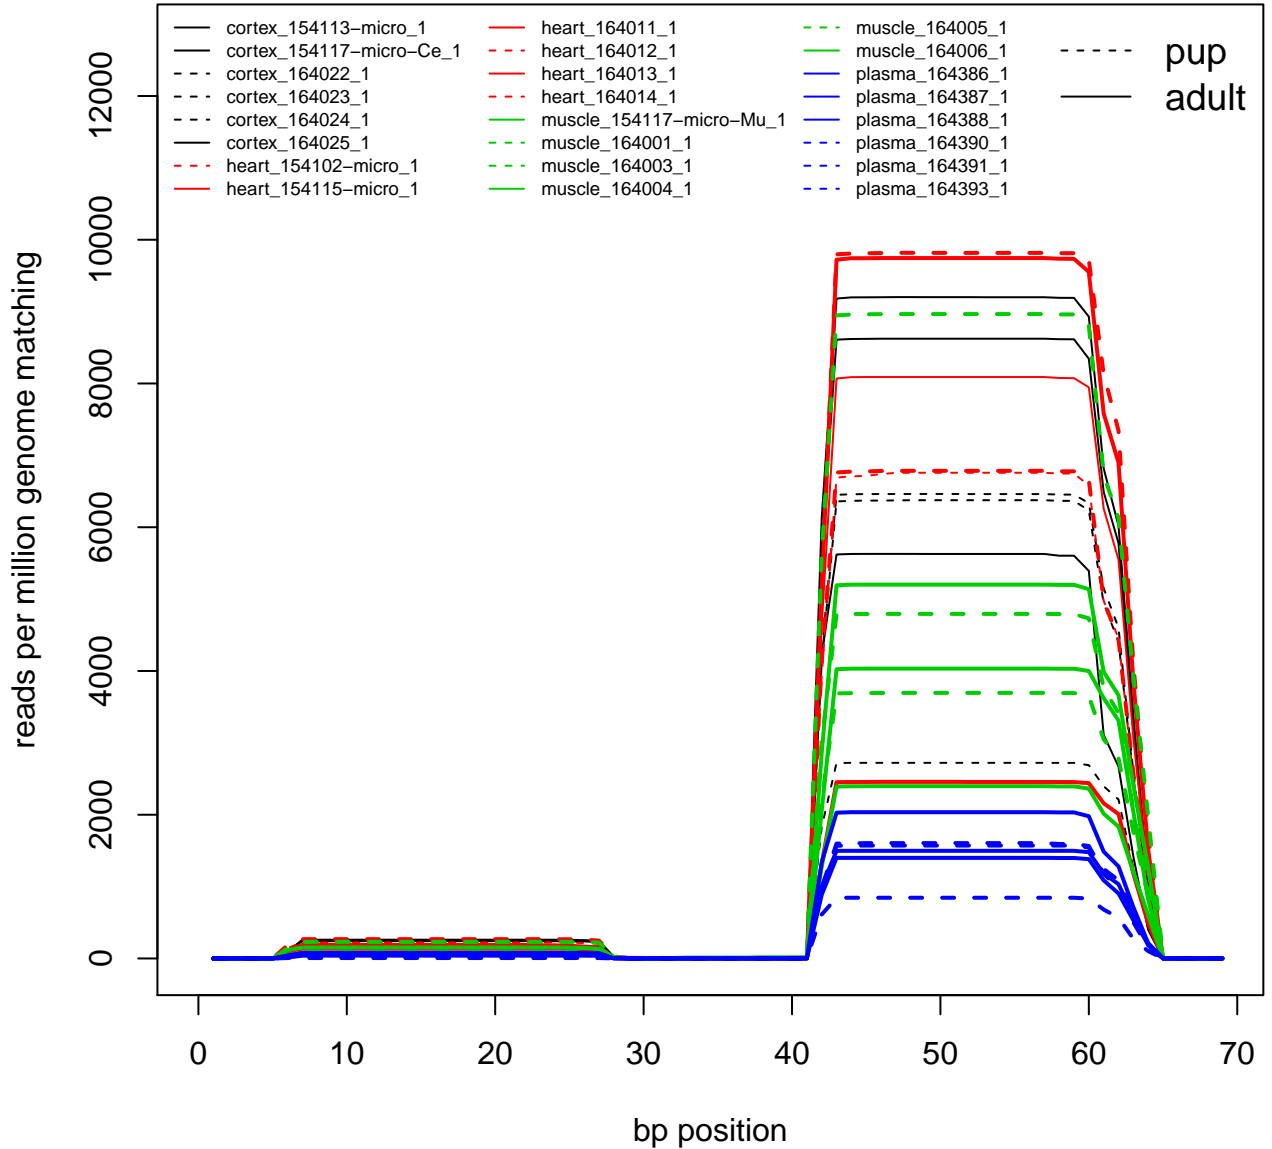

# novel\_101

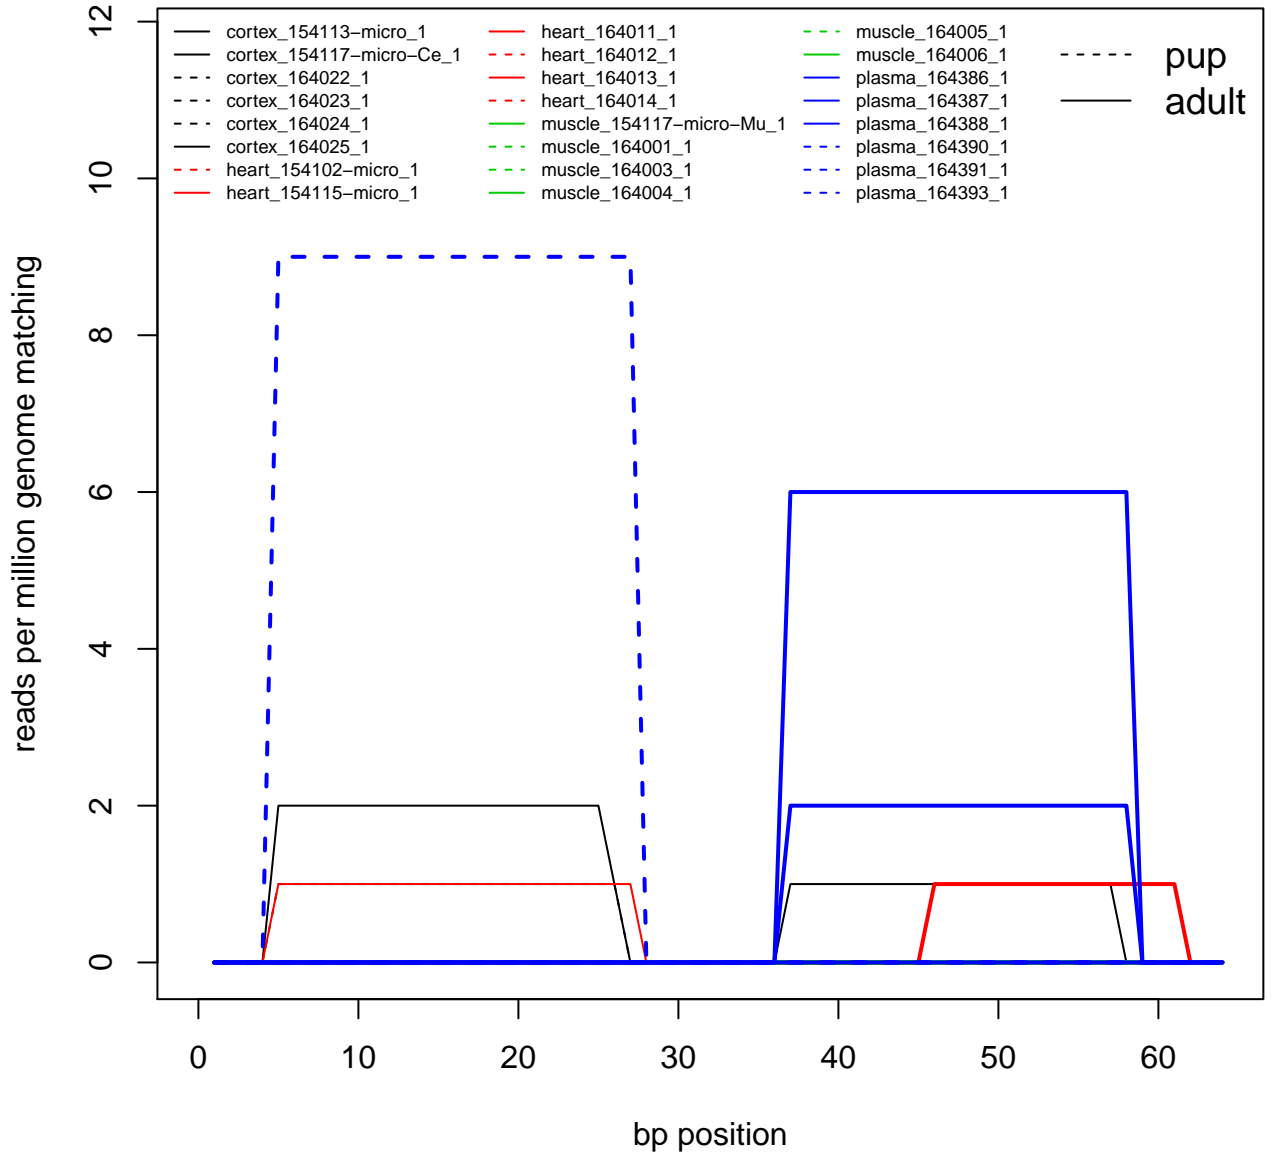

# novel\_102

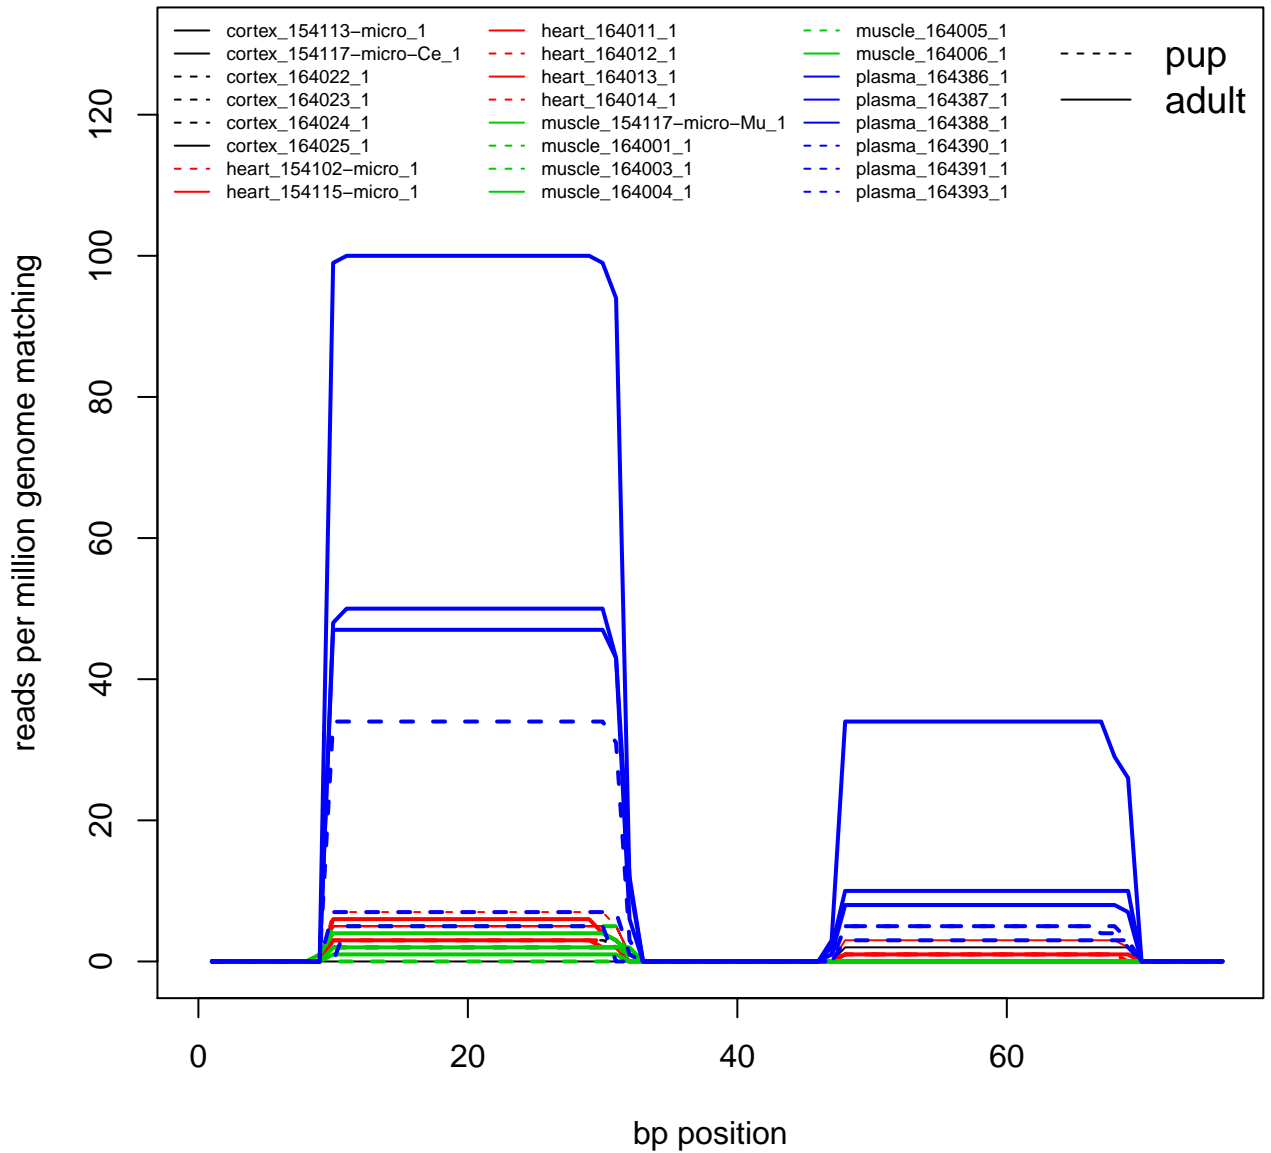

# lwe-miR-2387\_loc1

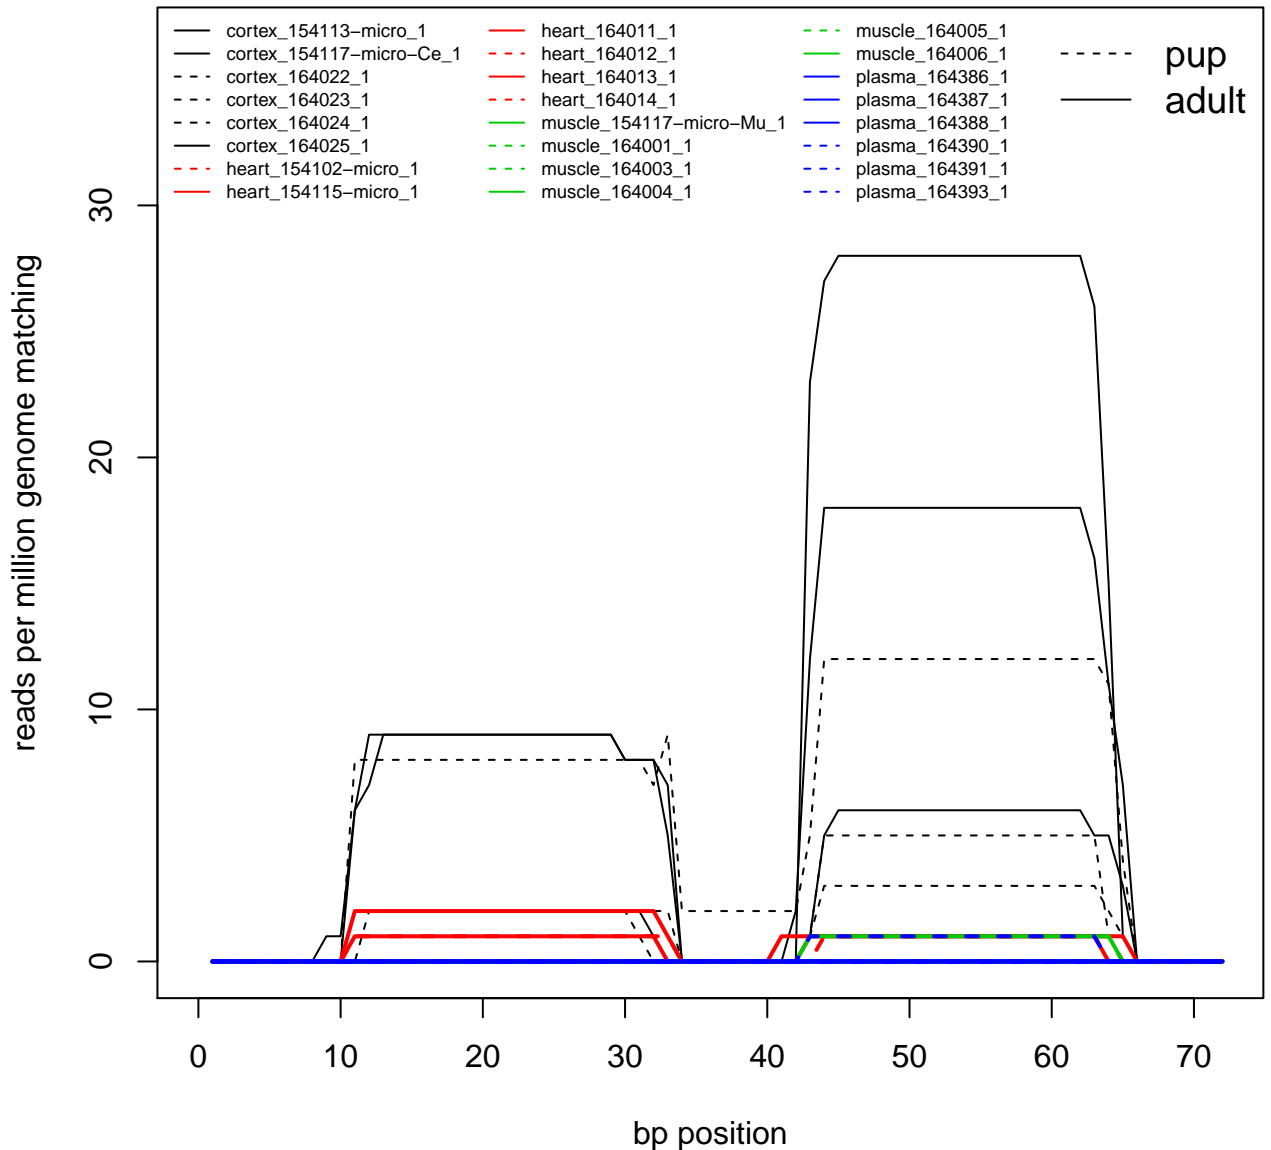

# lwe-miR-590\_loc1

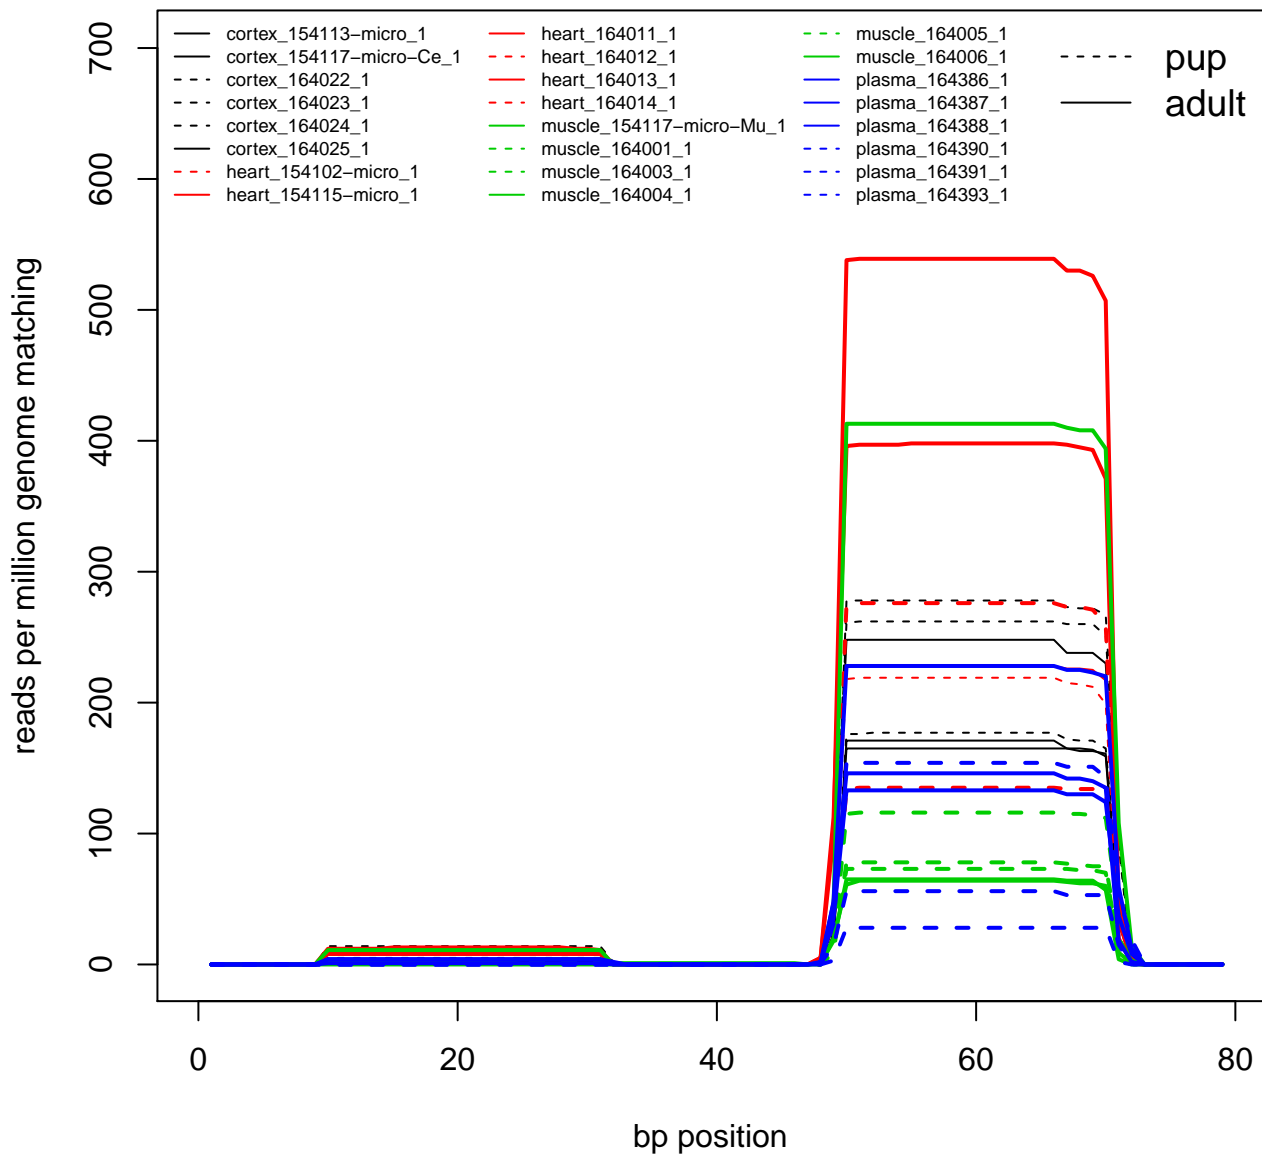



# novel\_104

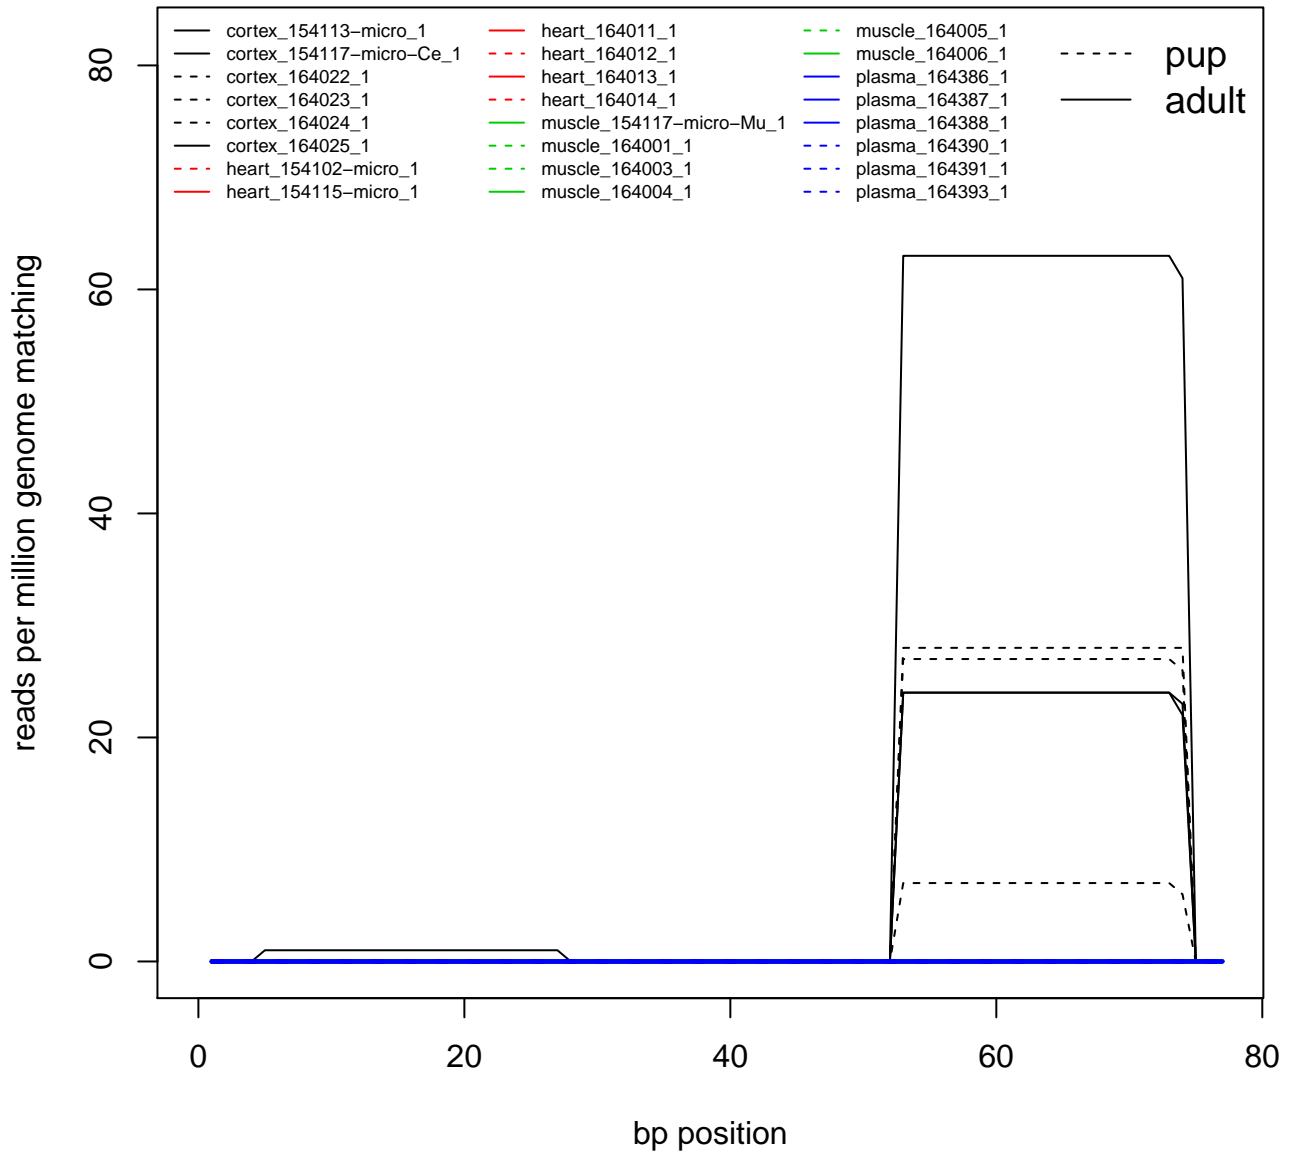



# novel\_105

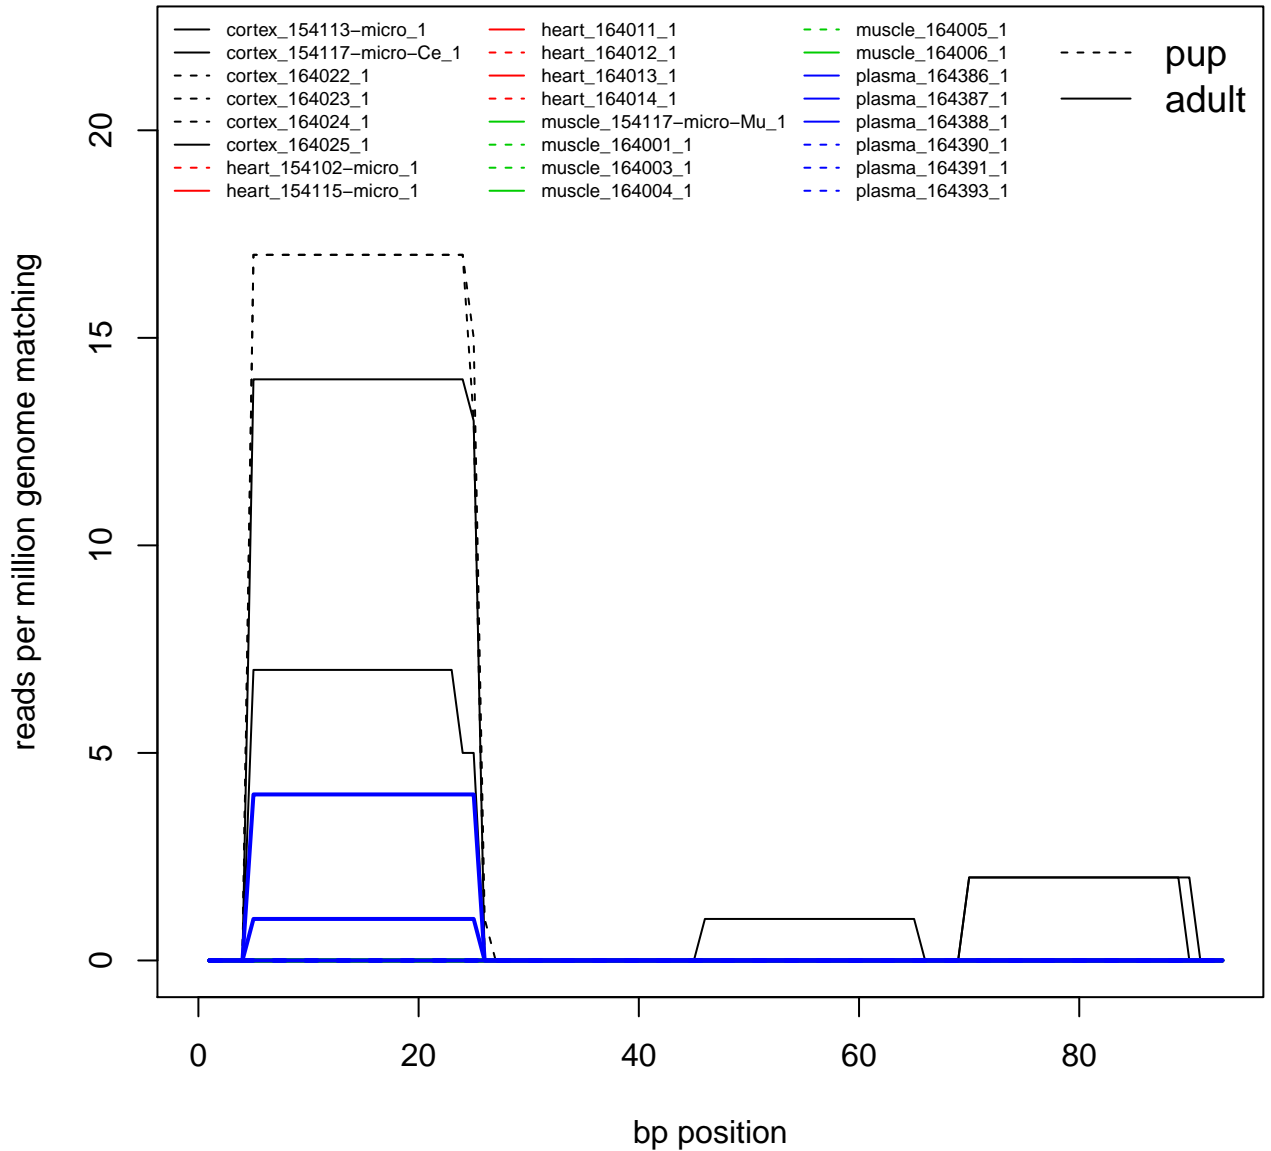

# novel\_106

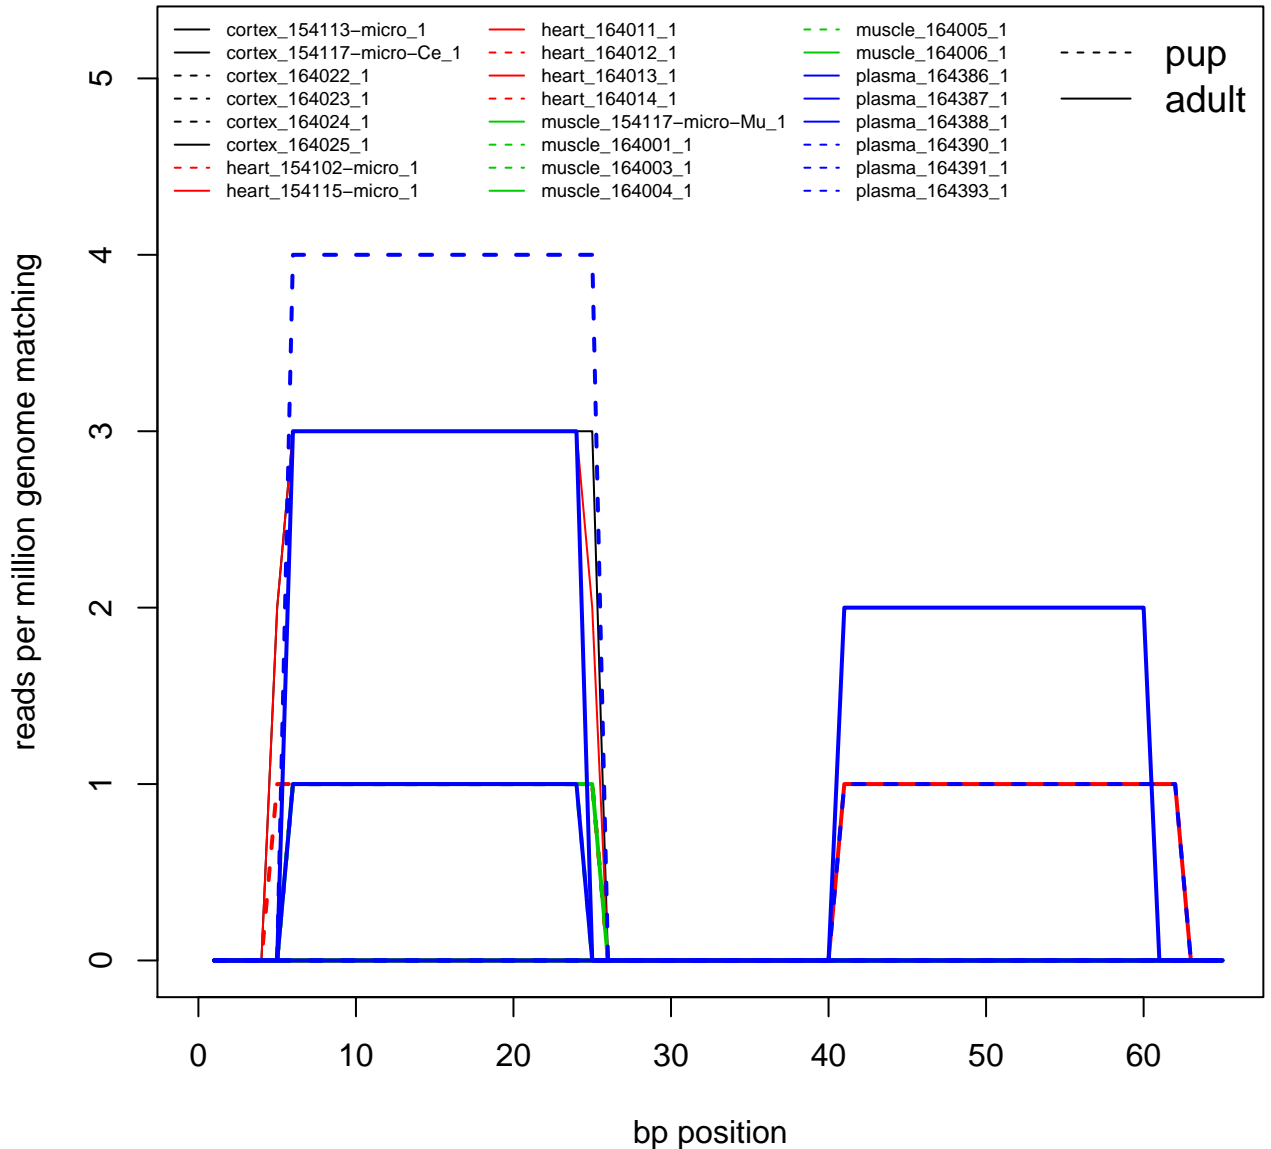



# lwe-miR-135\_loc3

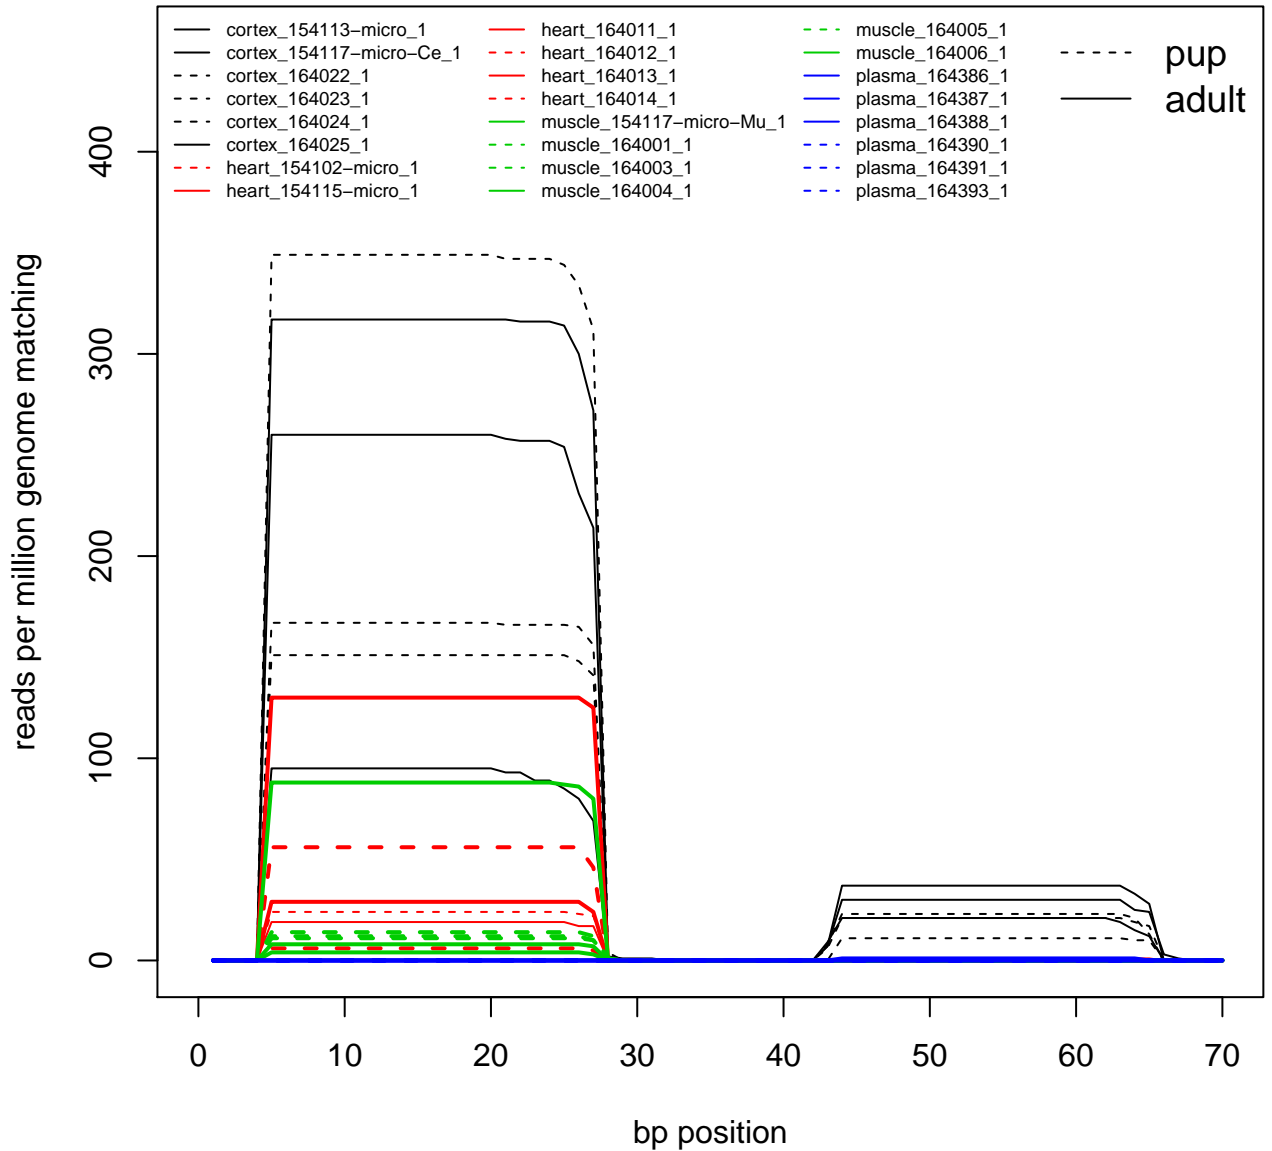

# novel\_108

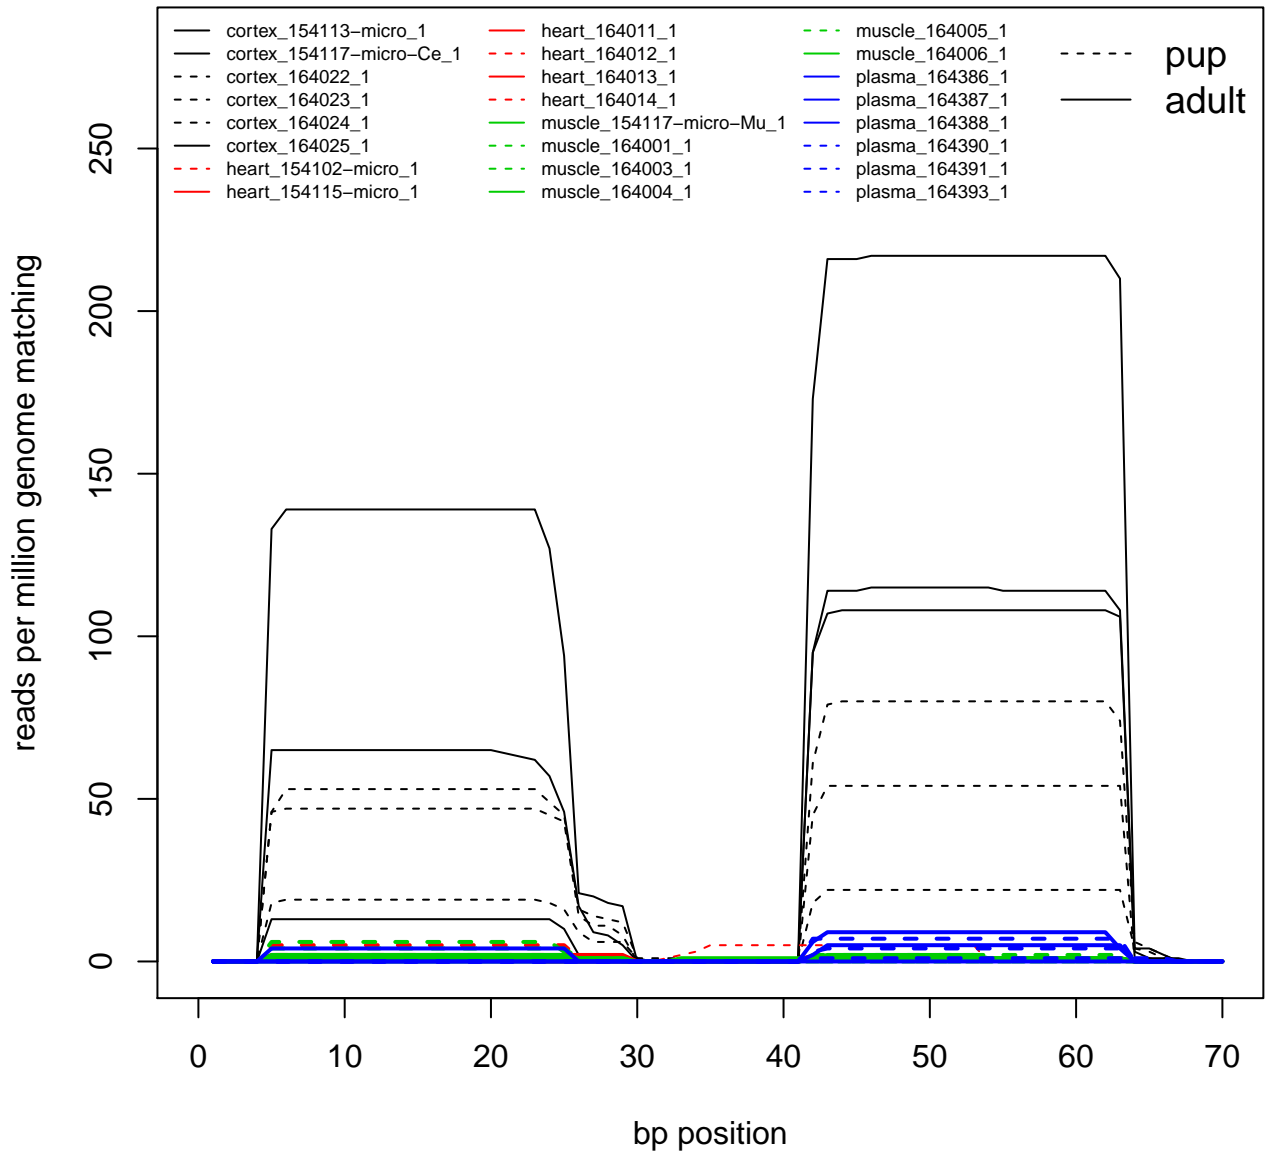





# lwe-miR-505\_loc1

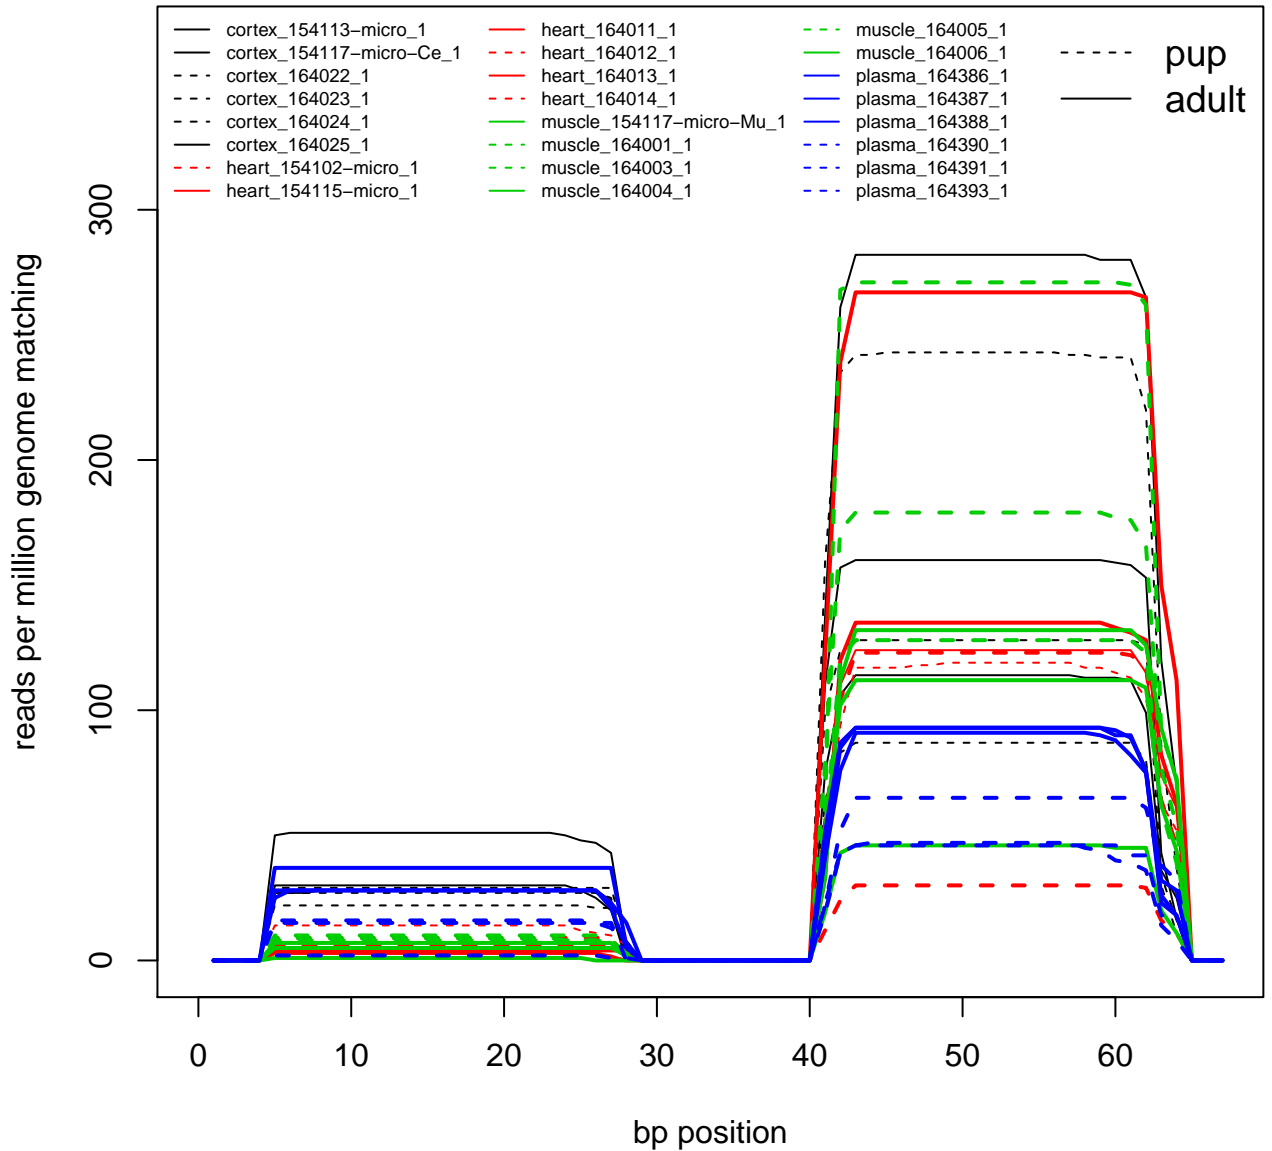



# novel\_111

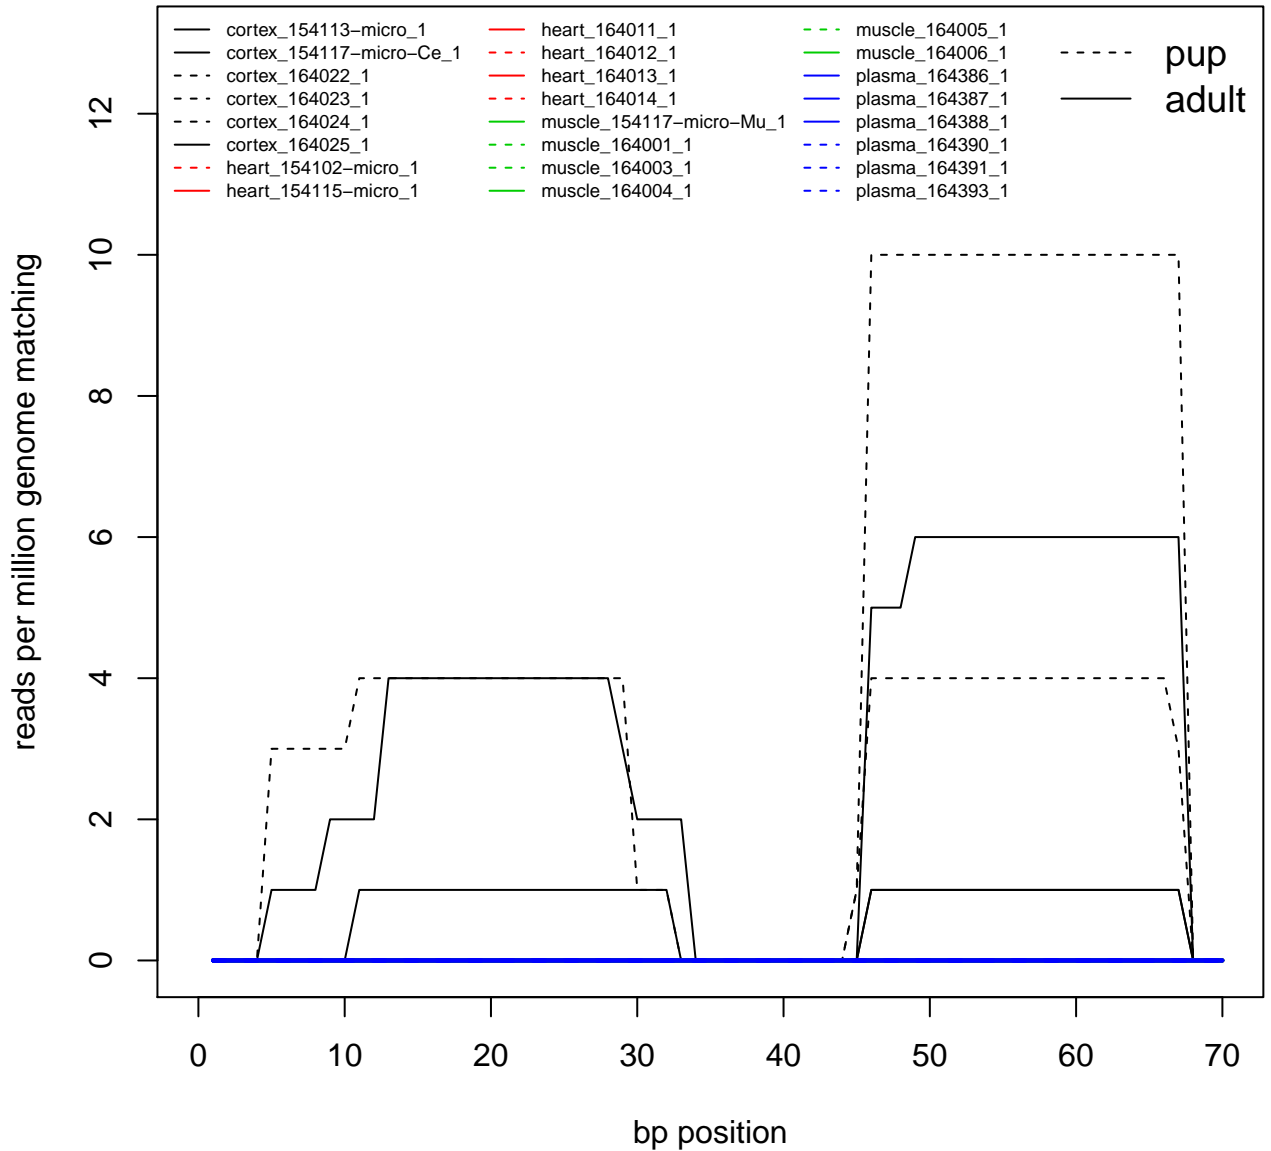





# lwe-miR-101a\_loc2

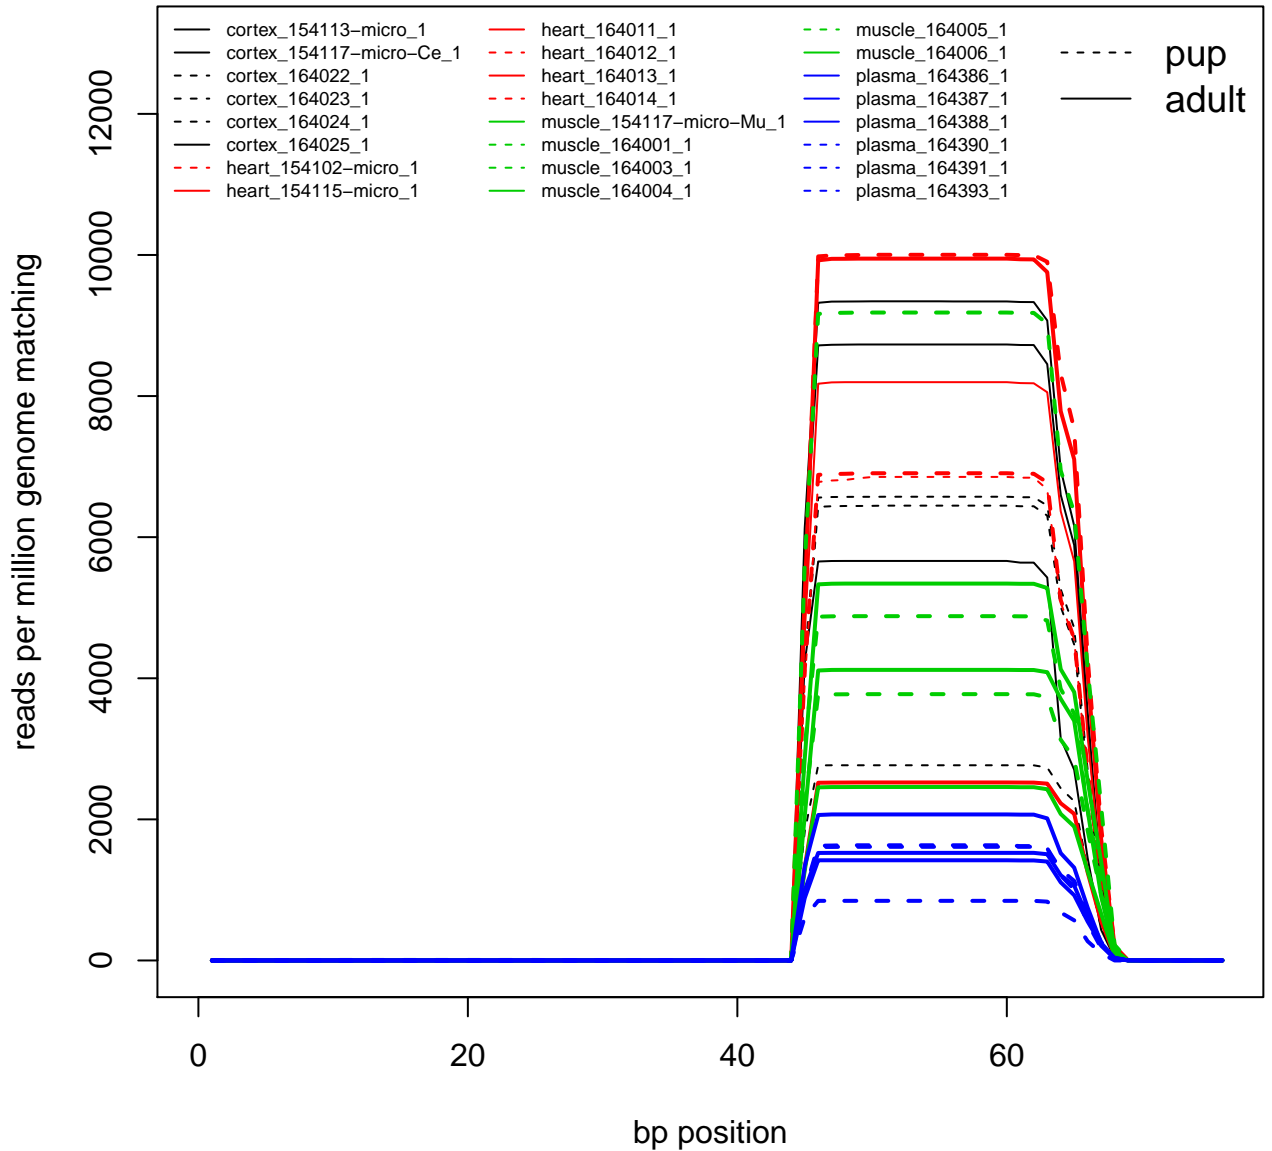

# novel\_114

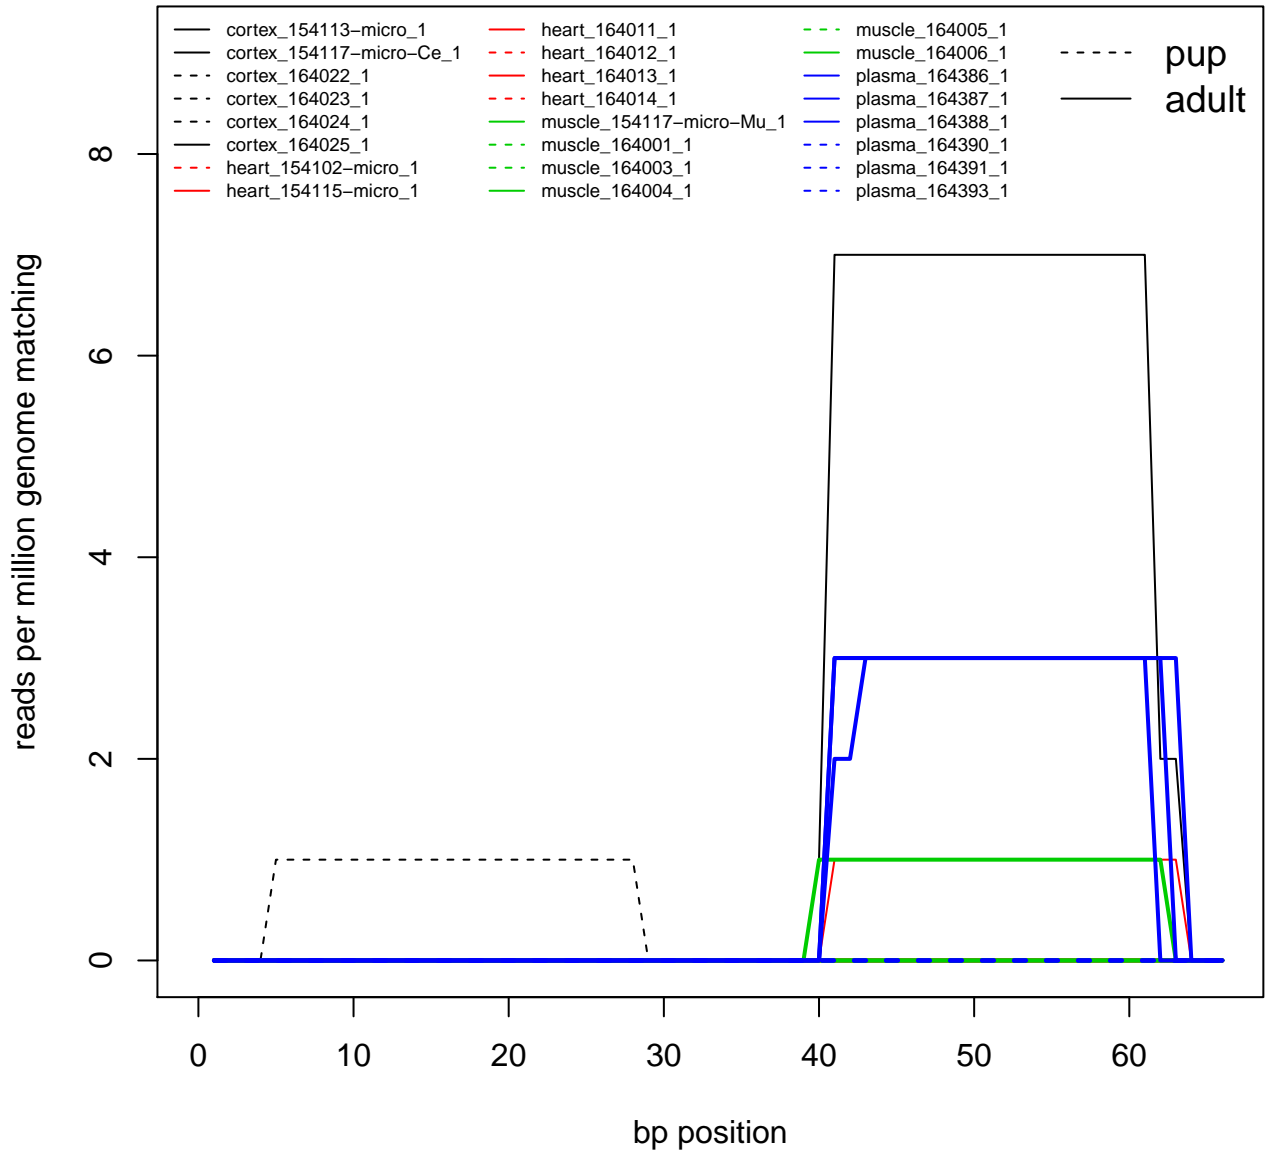



# lwe-miR-338a\_loc1

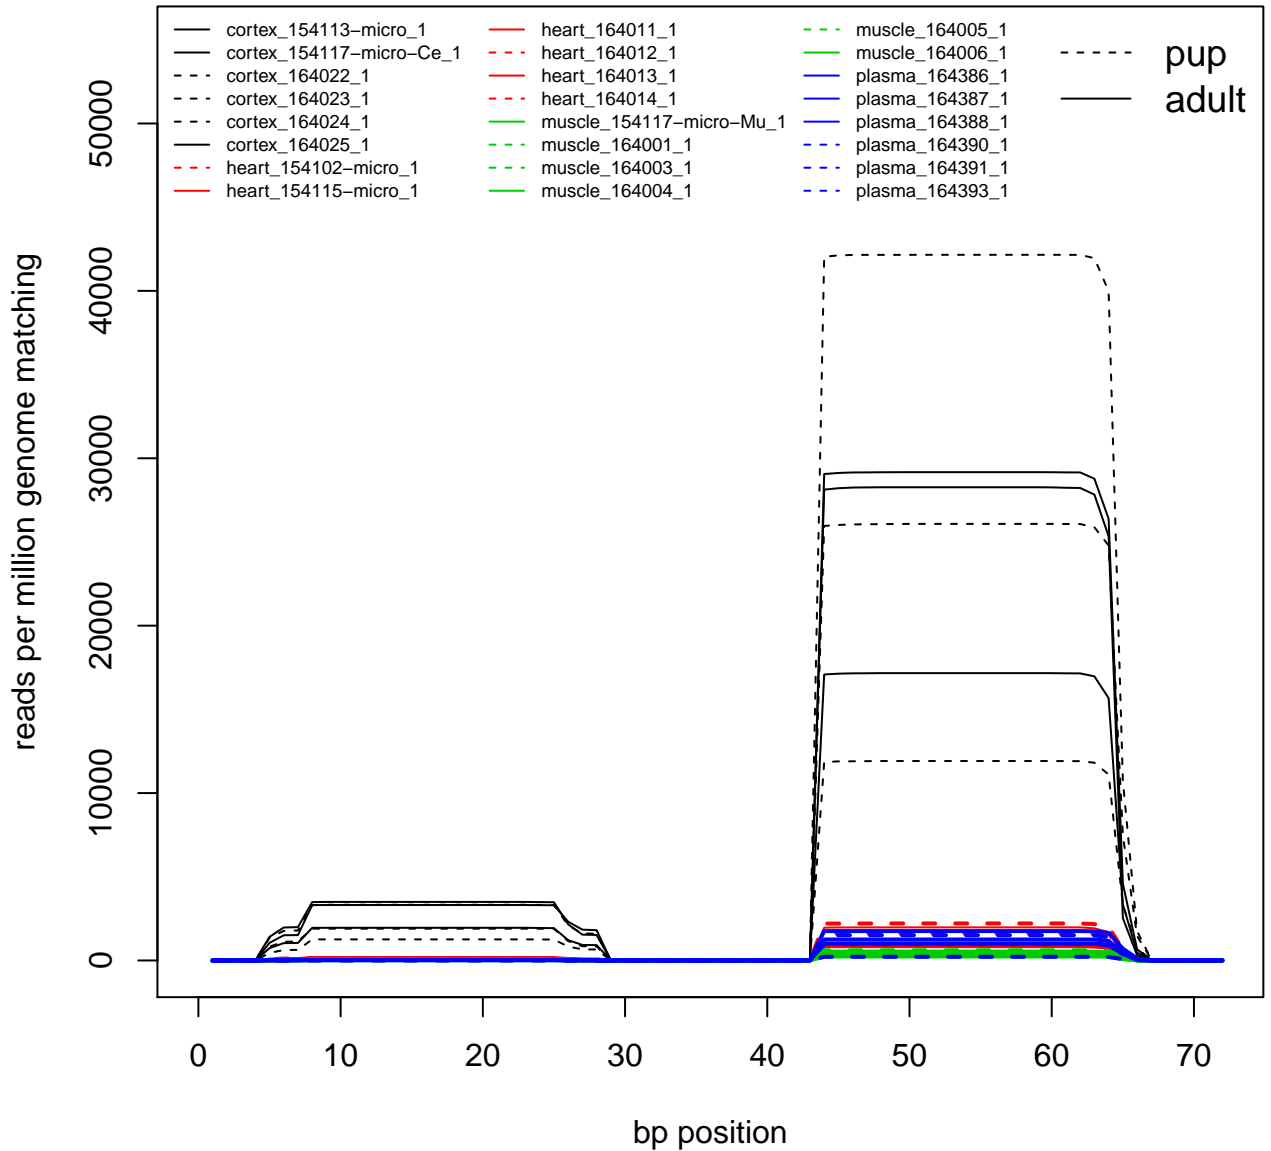

# lwe-miR-802\_loc1

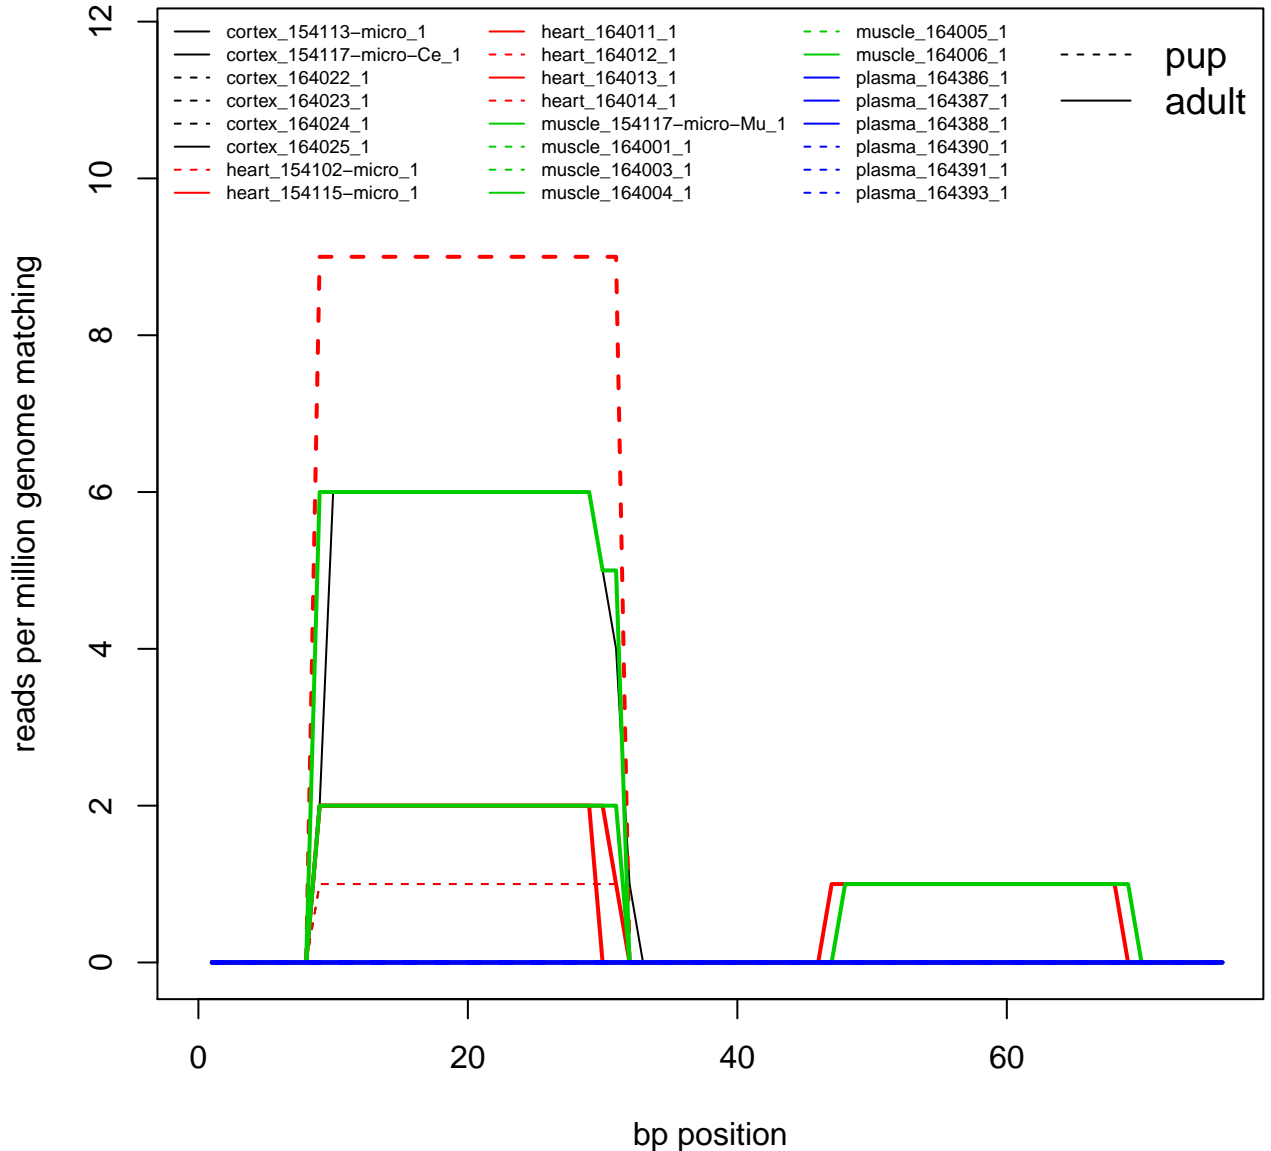



# lwe-miR-129a\_loc2

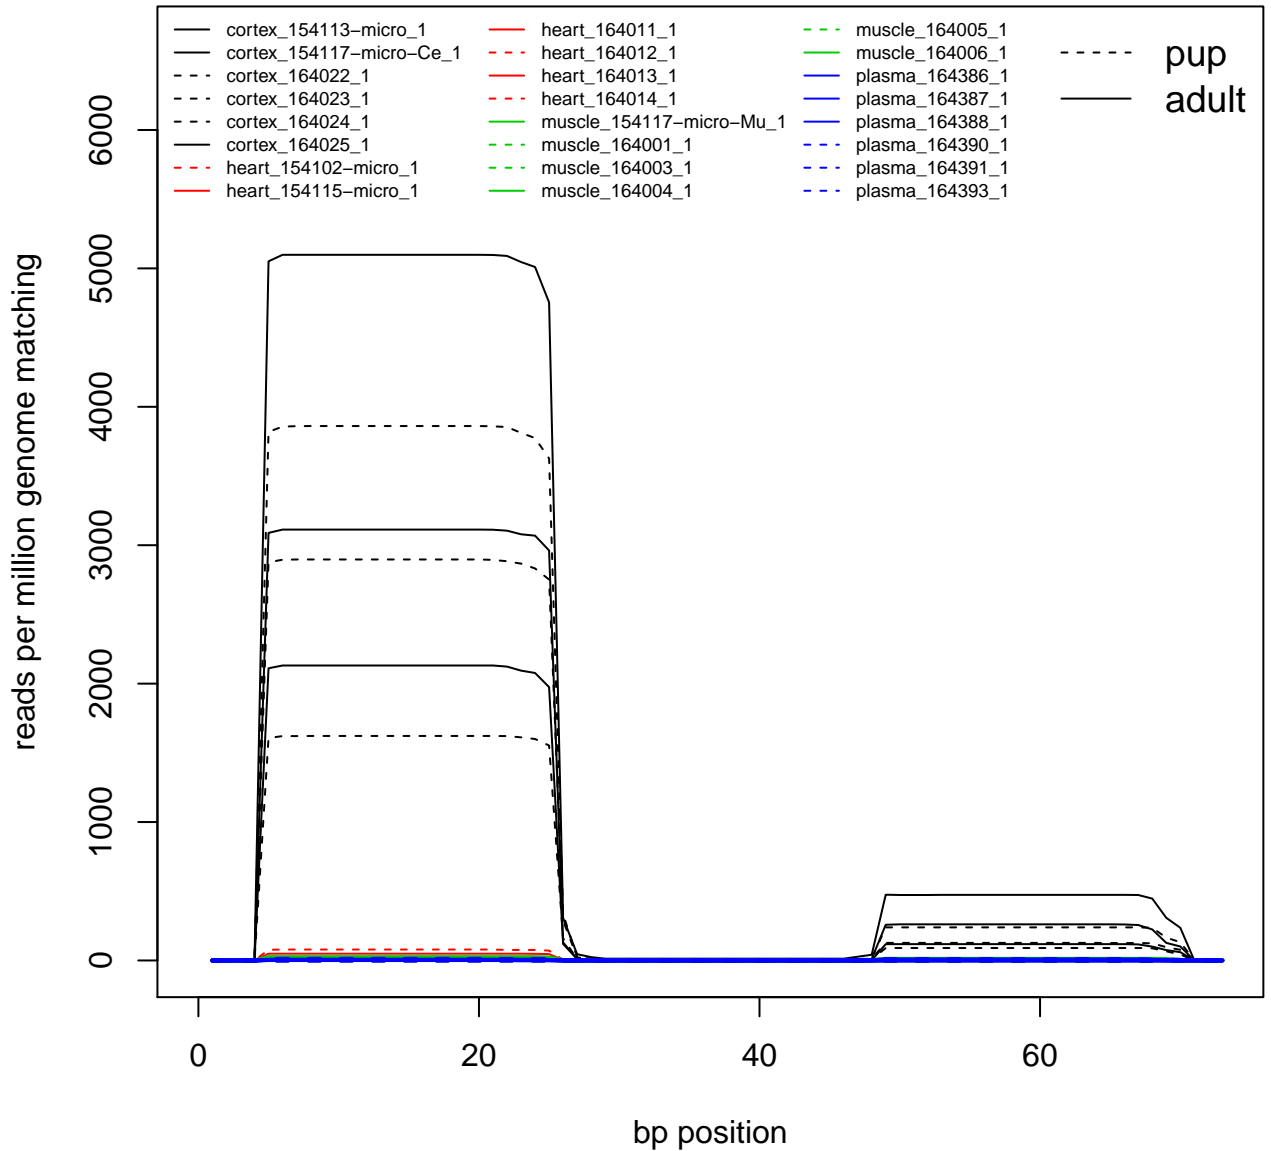

# lwe-miR-1271\_loc1

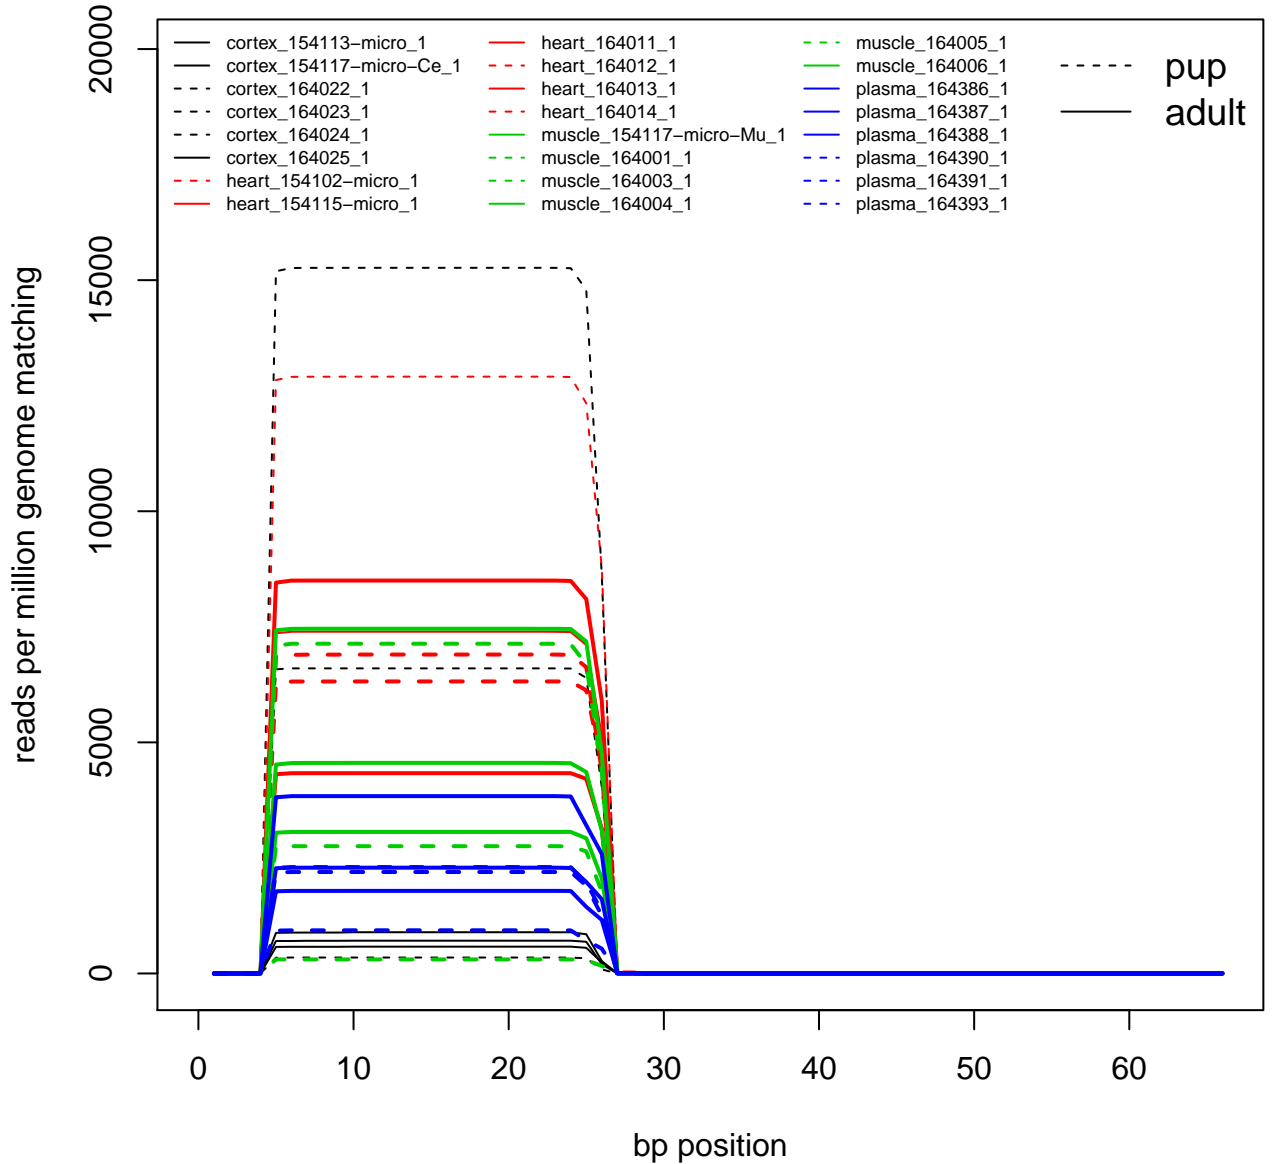

# novel\_116

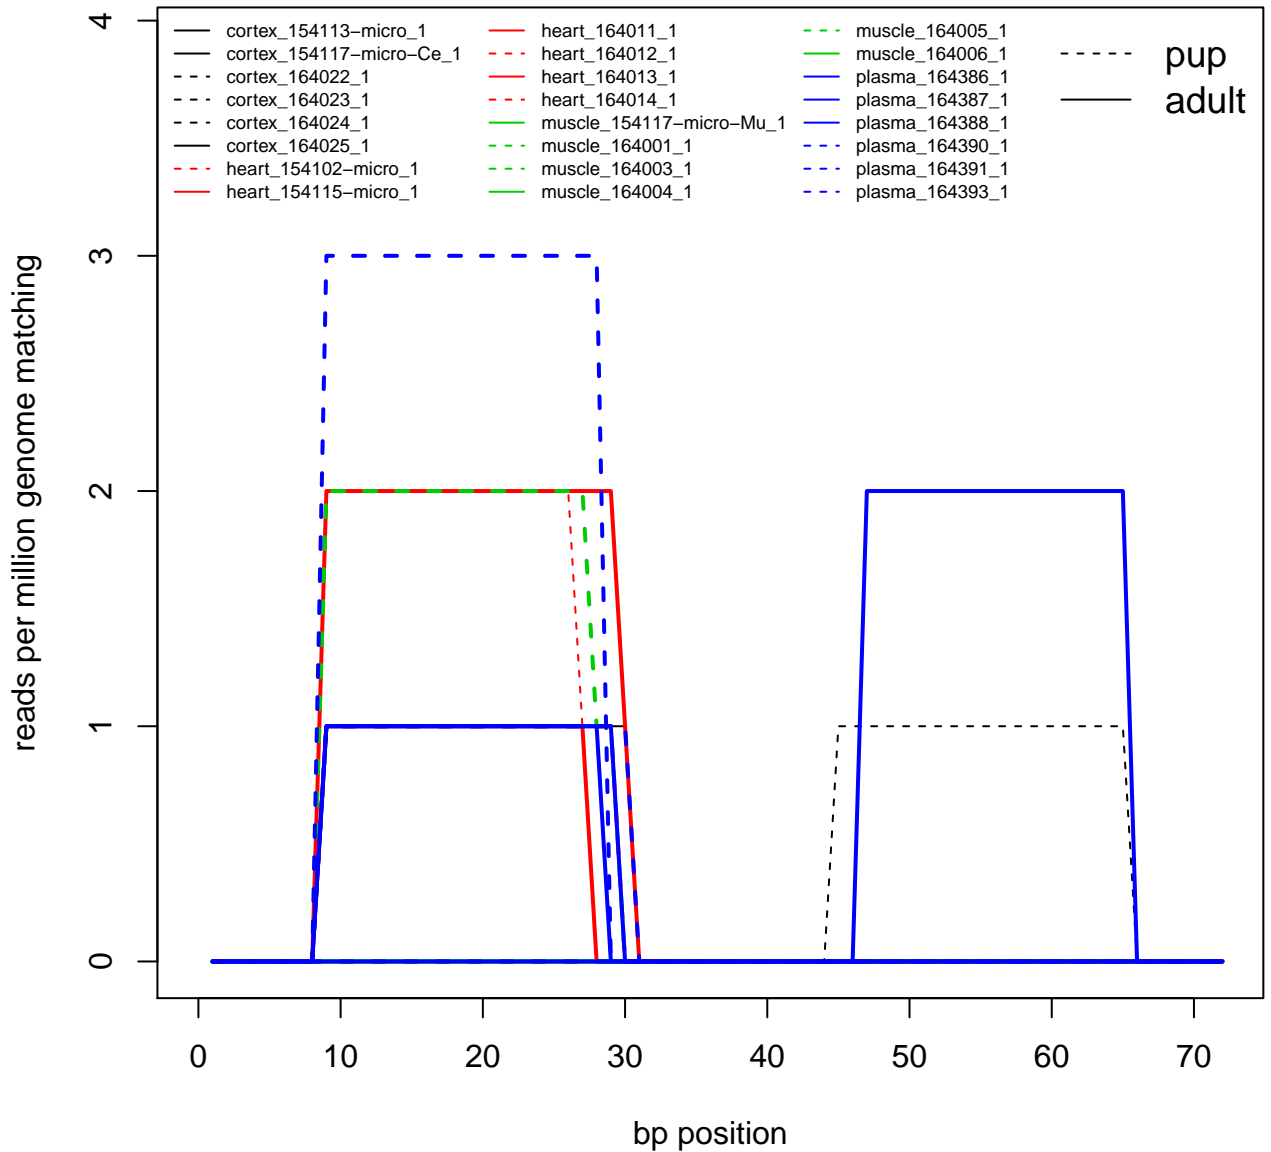

# novel\_117

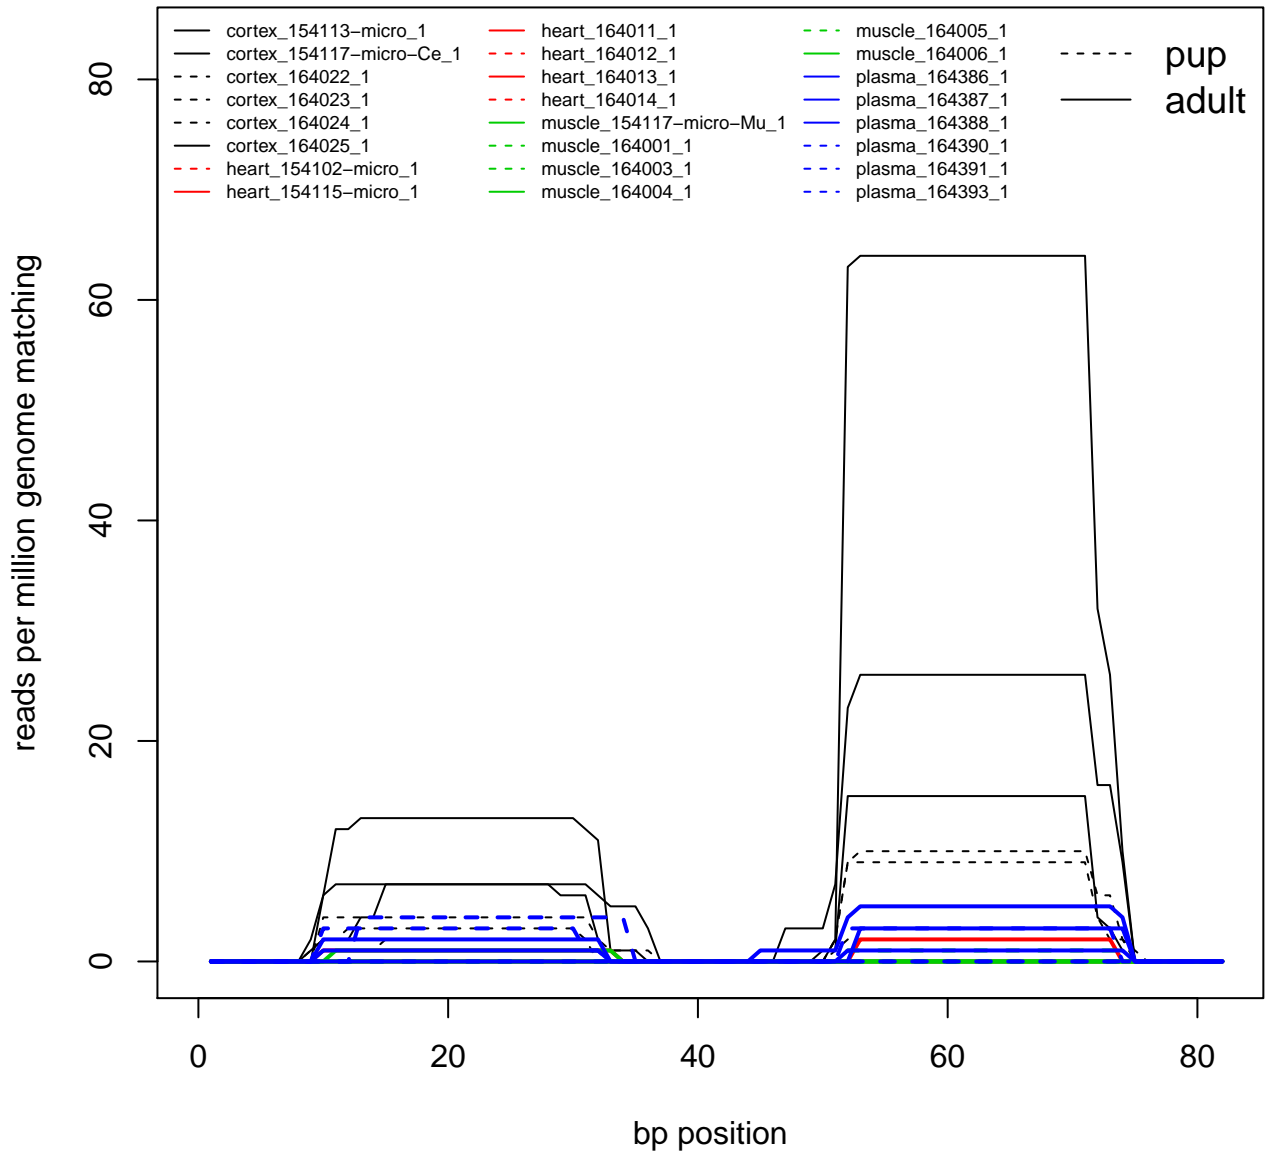

# lwe-miR-25\_loc1

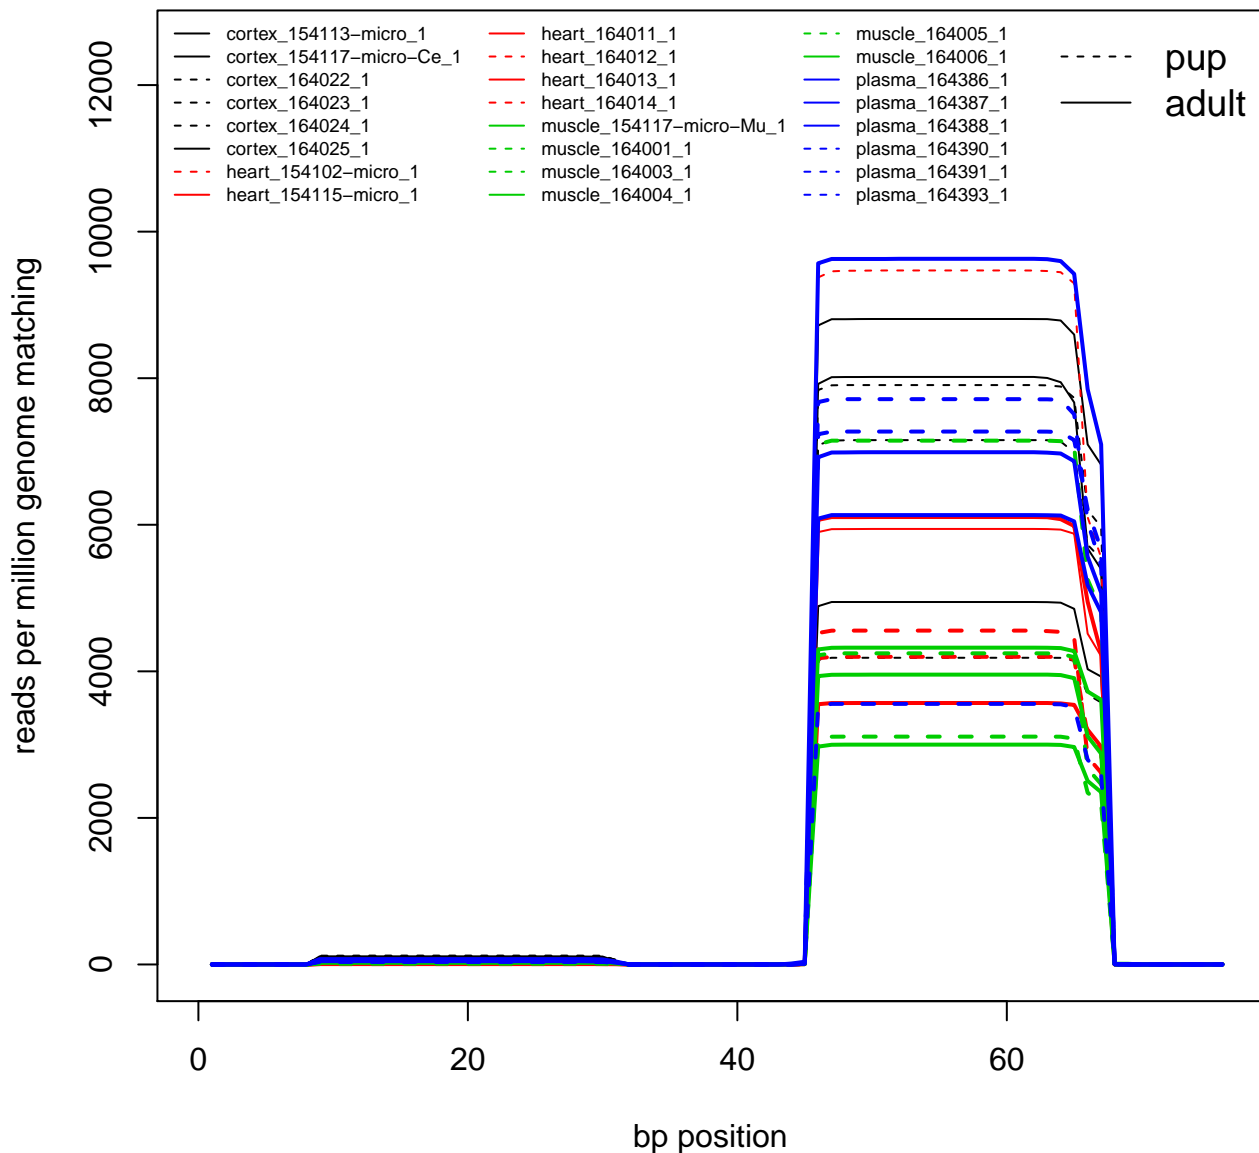

# lwe-miR-93\_loc1

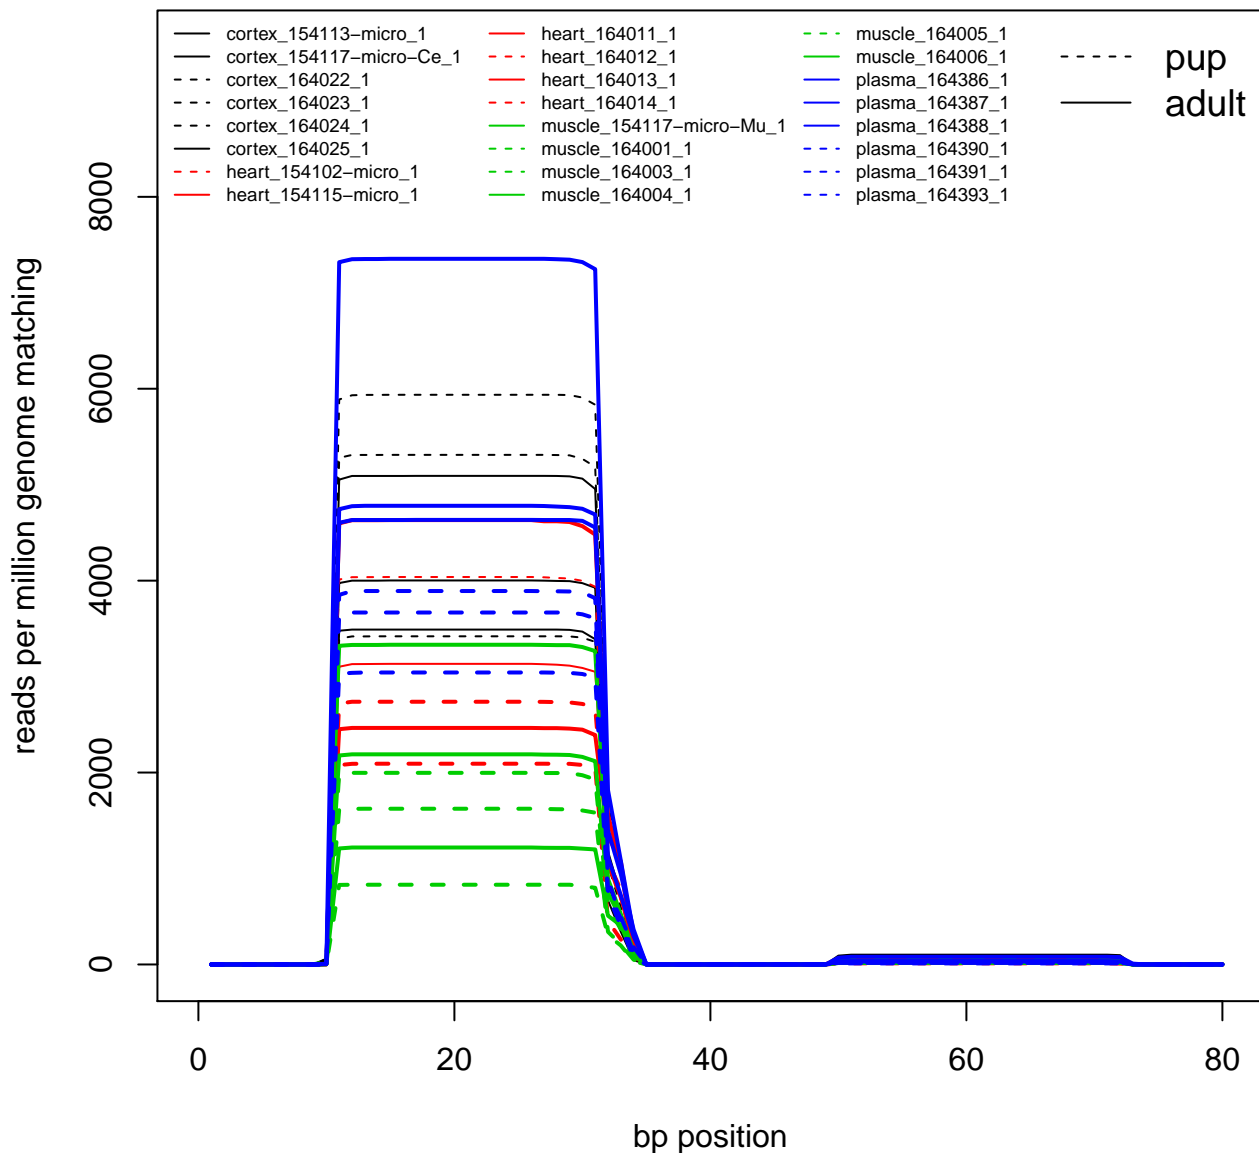

# lwe-miR-106\_loc2

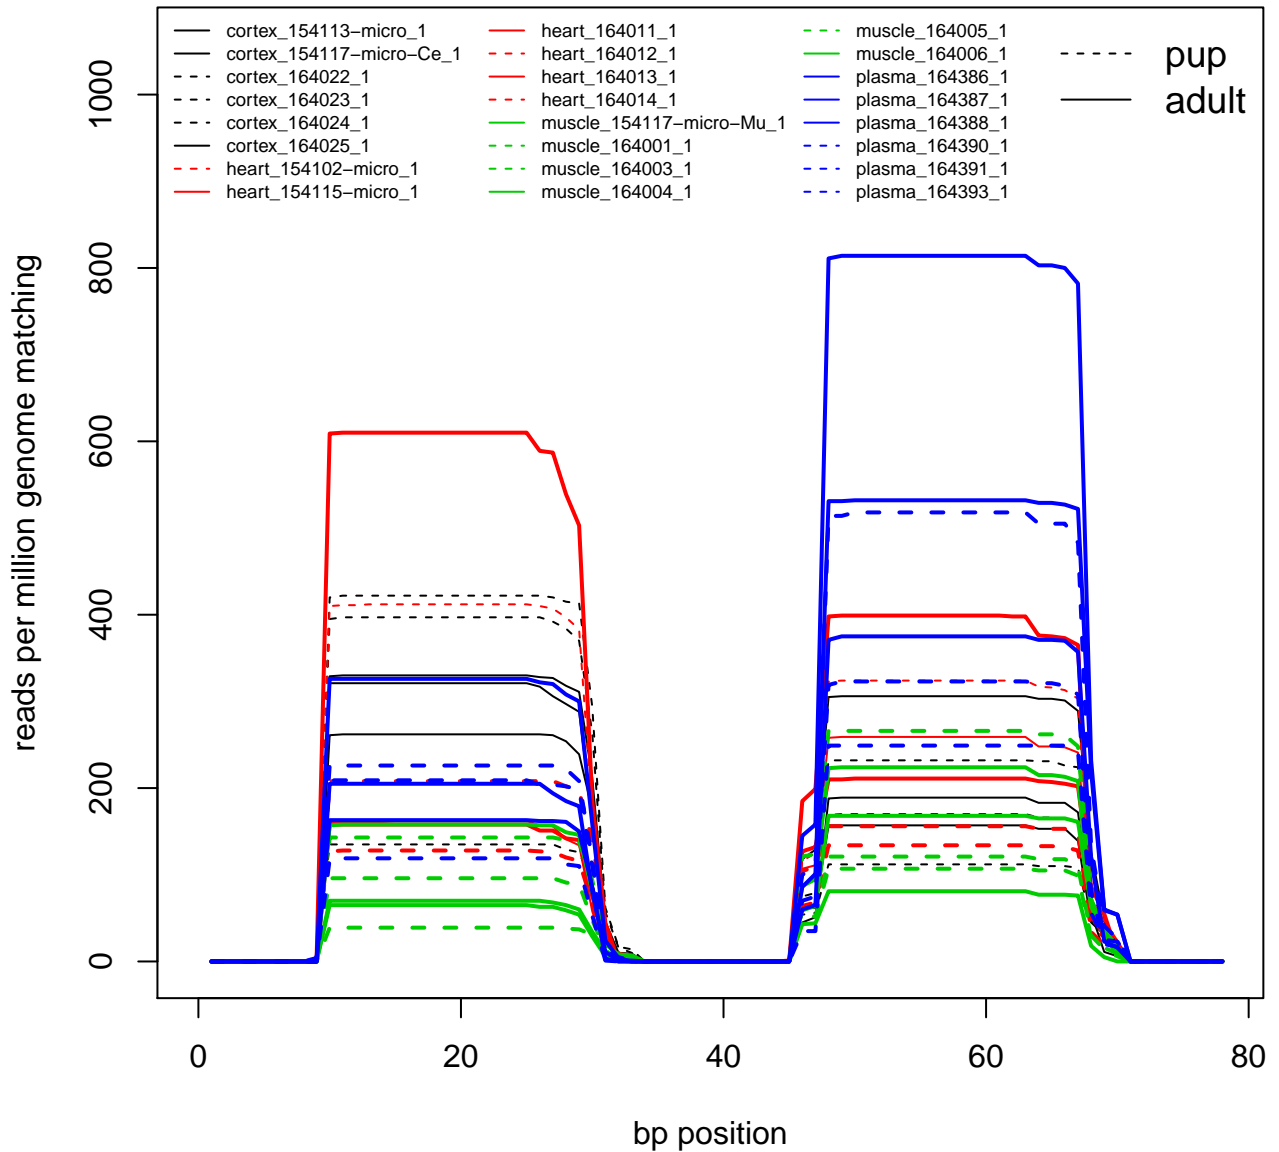

# novel\_118

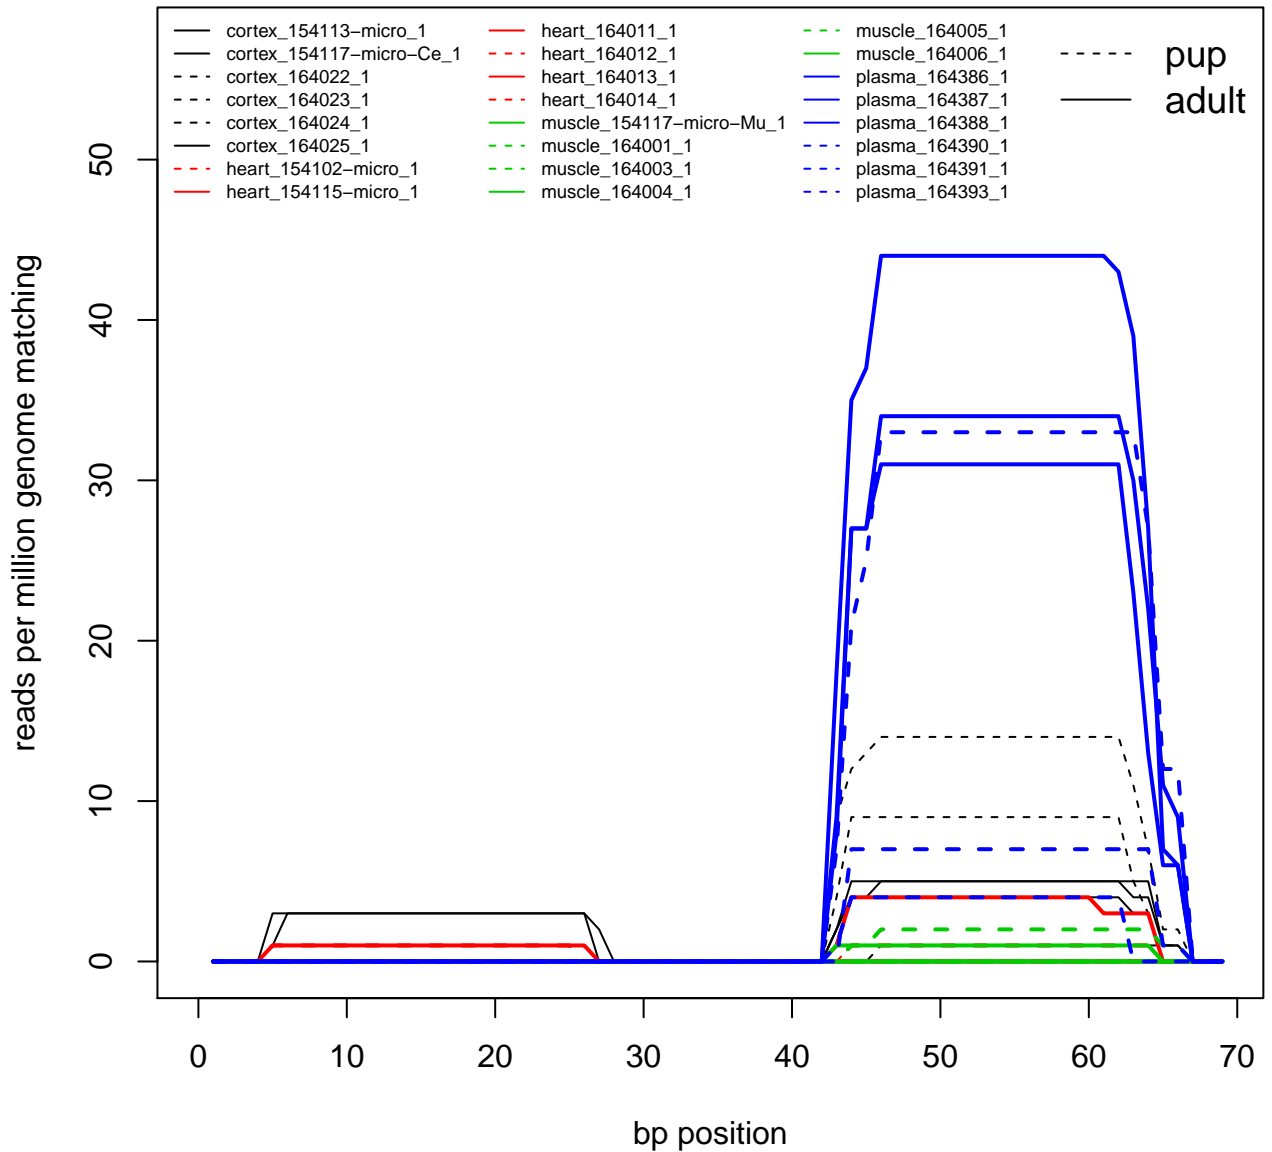







# novel\_119

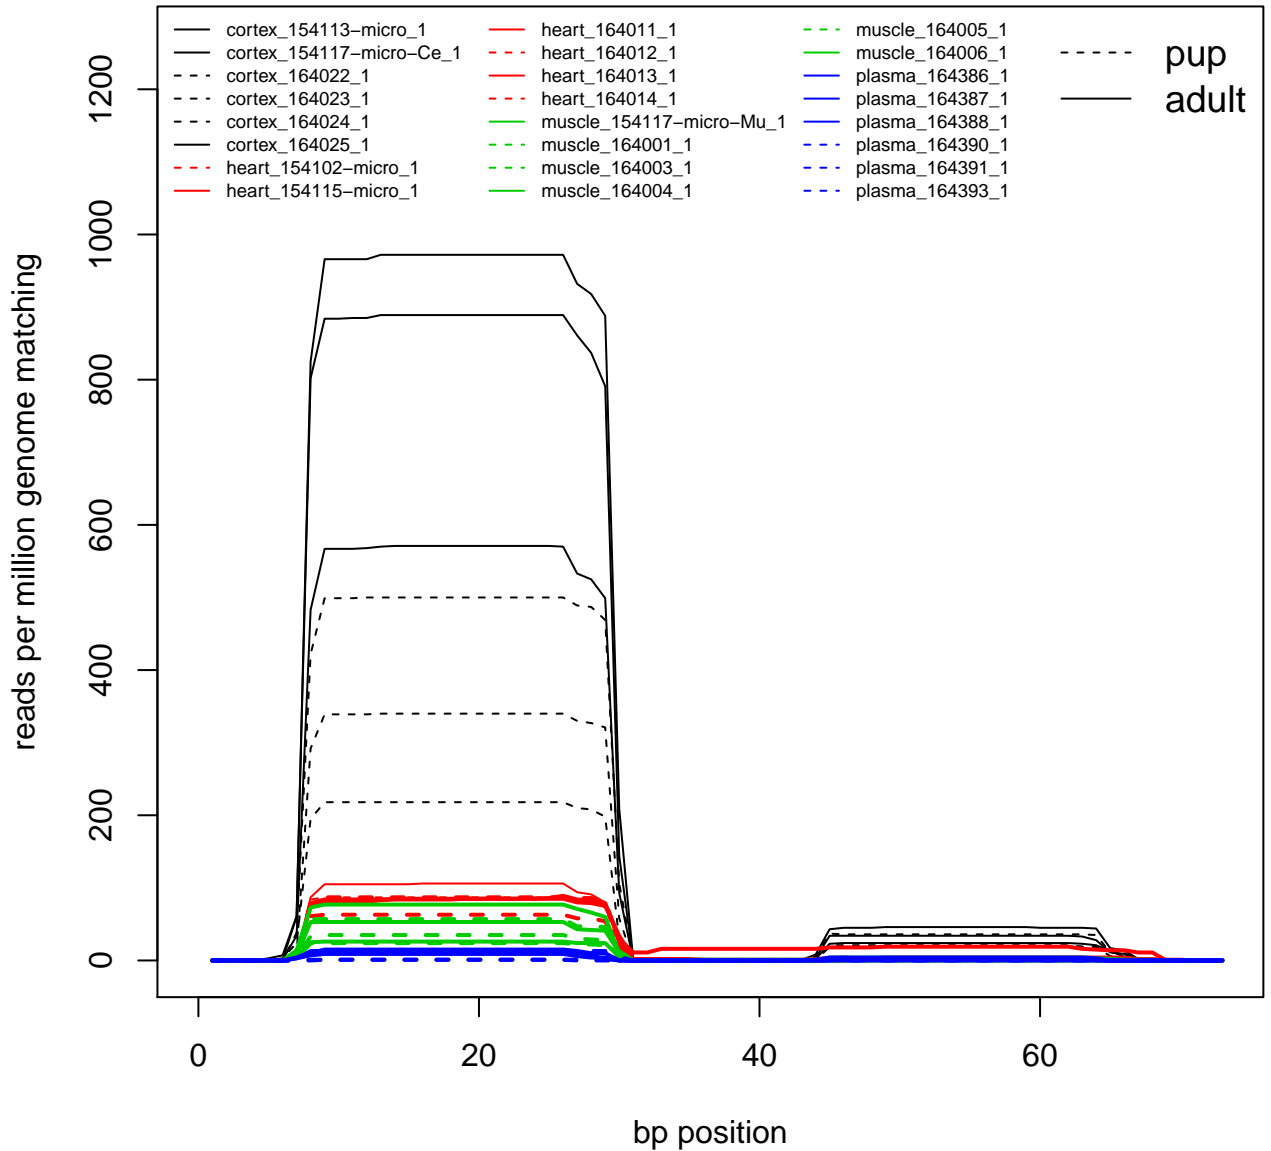

# novel\_120

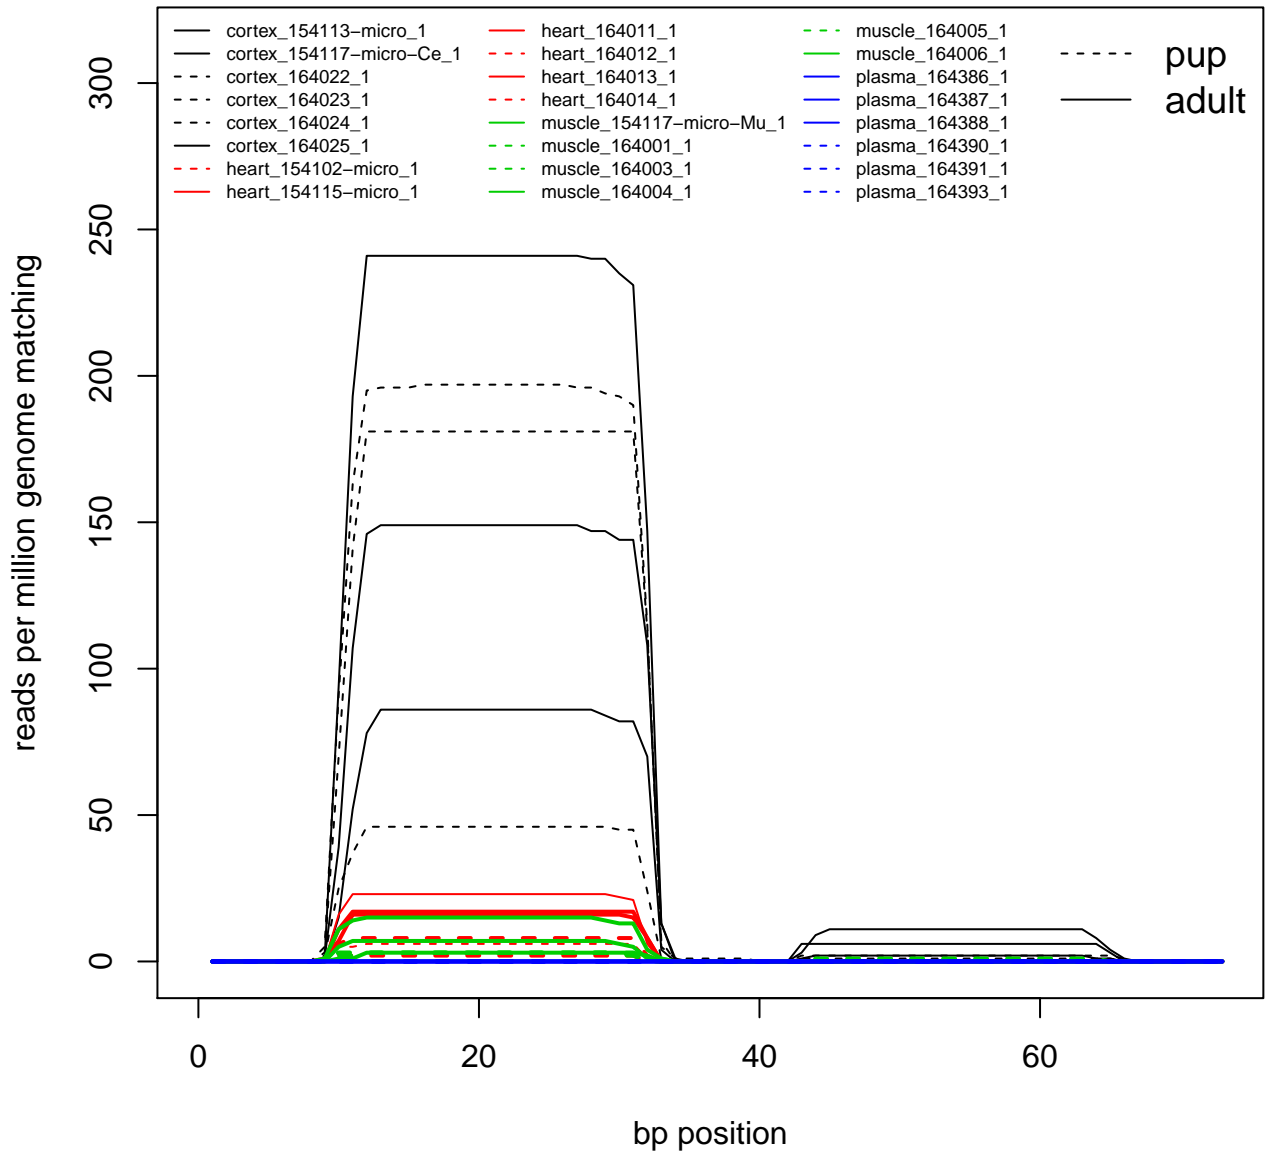

# lwe-miR-206\_loc1

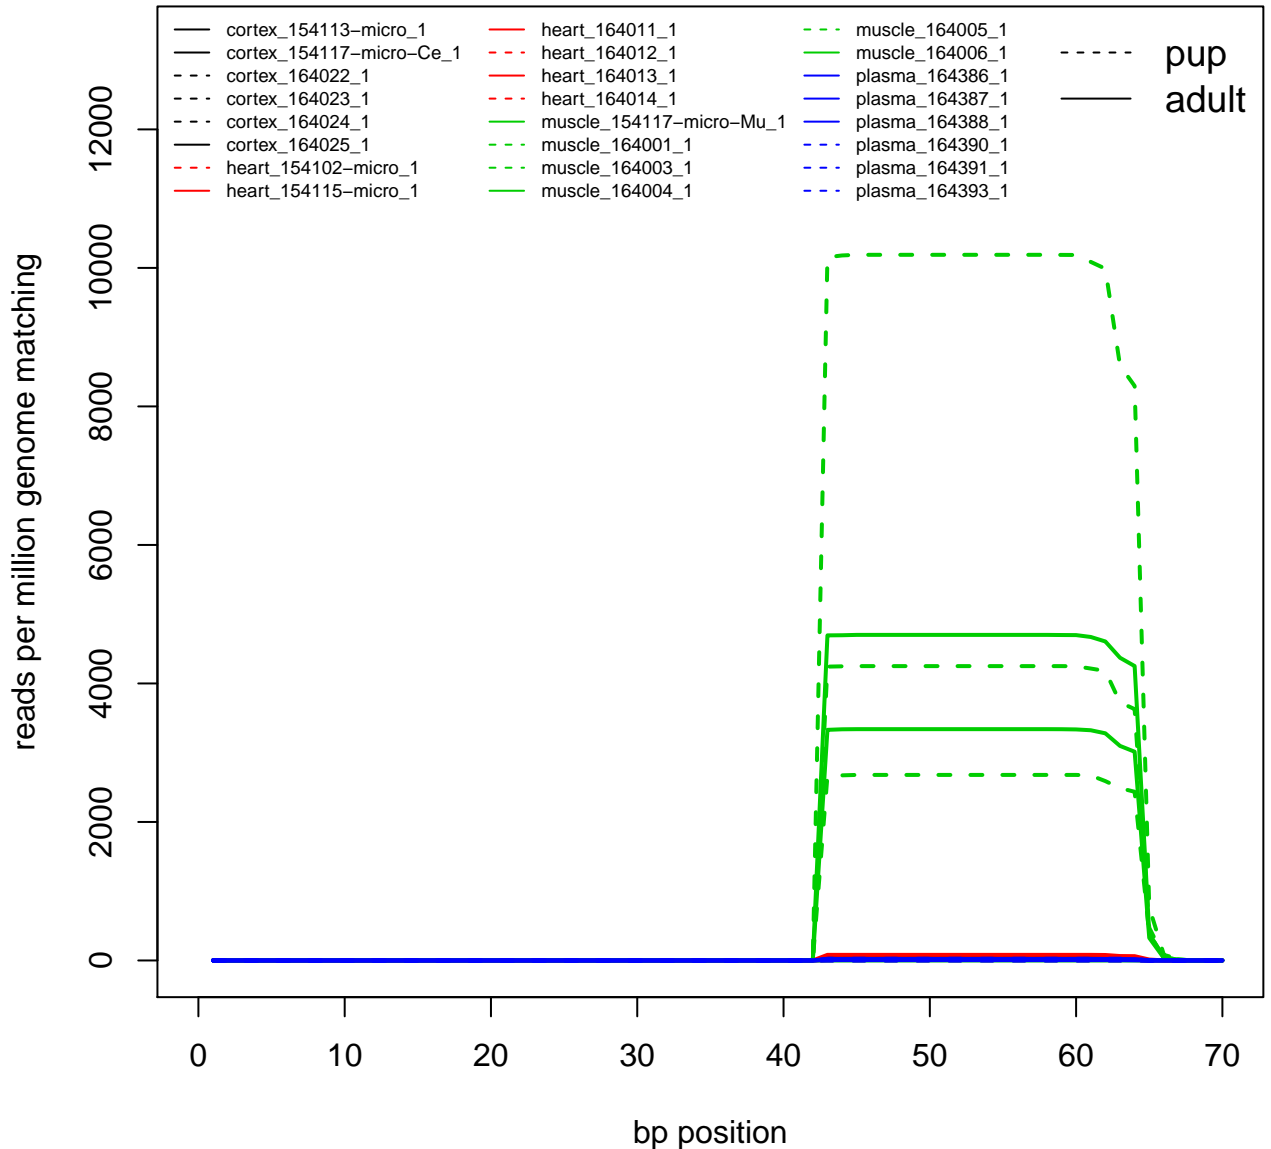



# lwe-miR-26b\_loc1

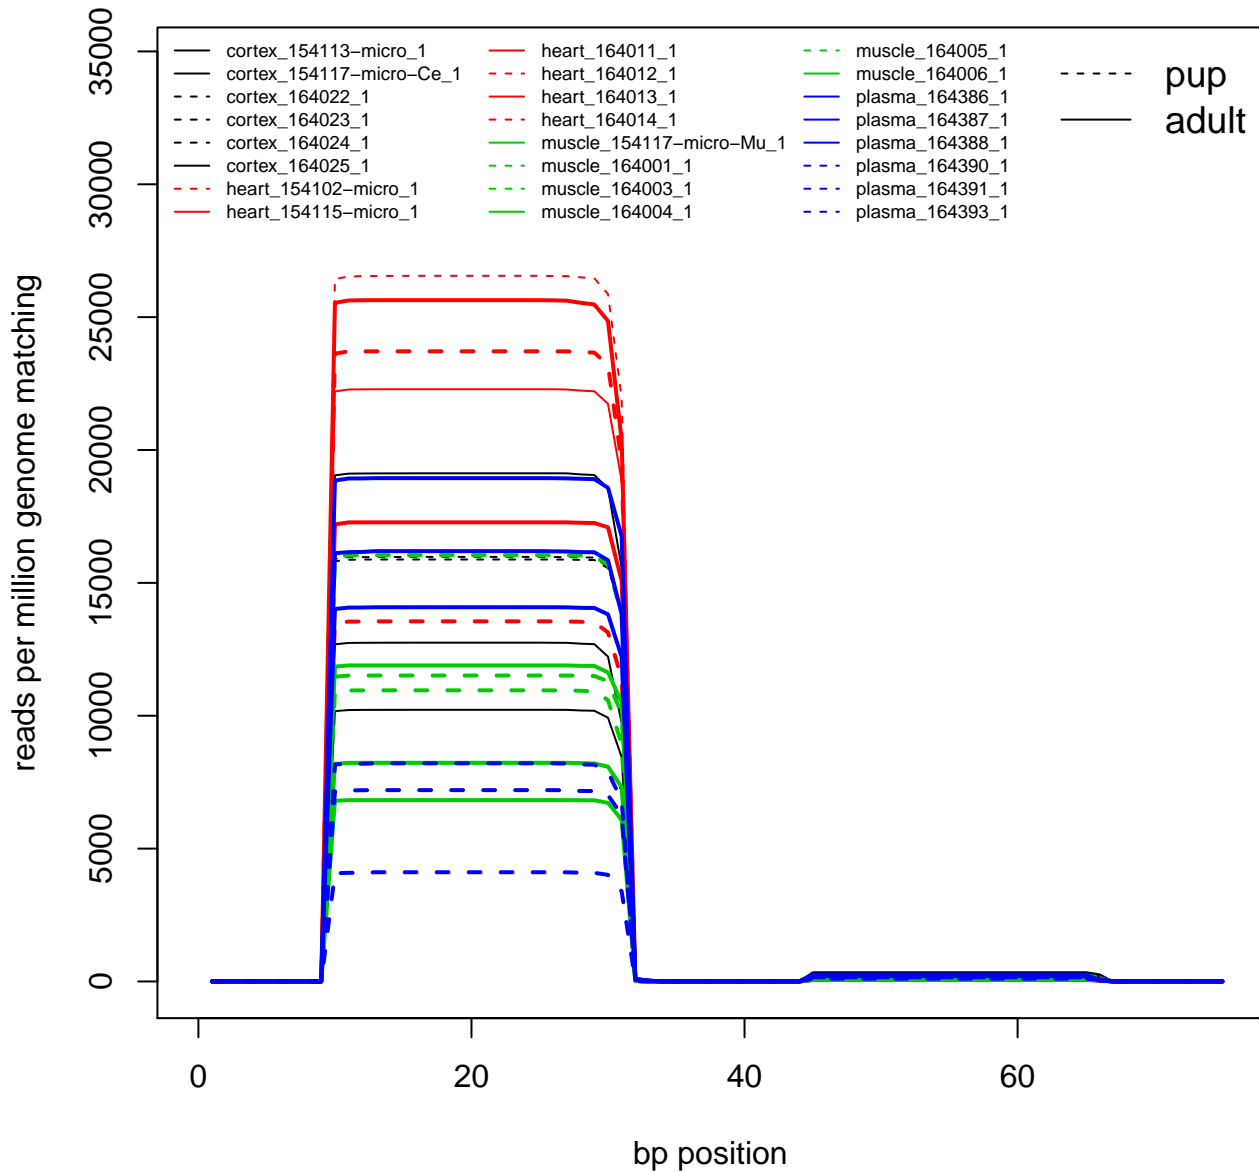

# lwe-miR-340\_loc1

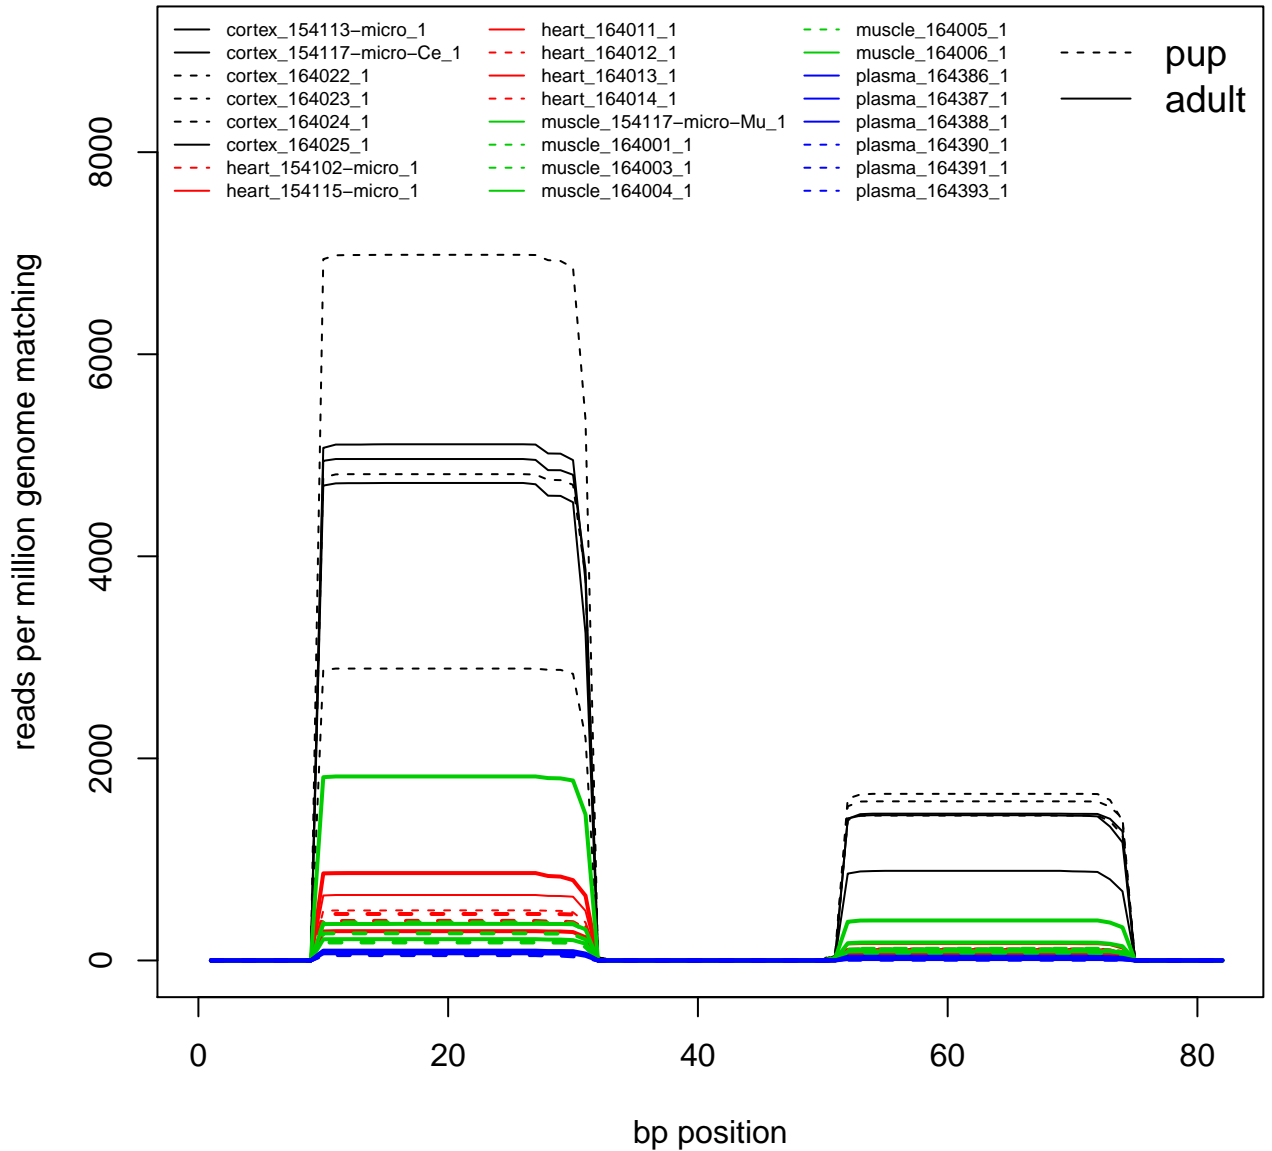



# lwe-miR-142\_loc1

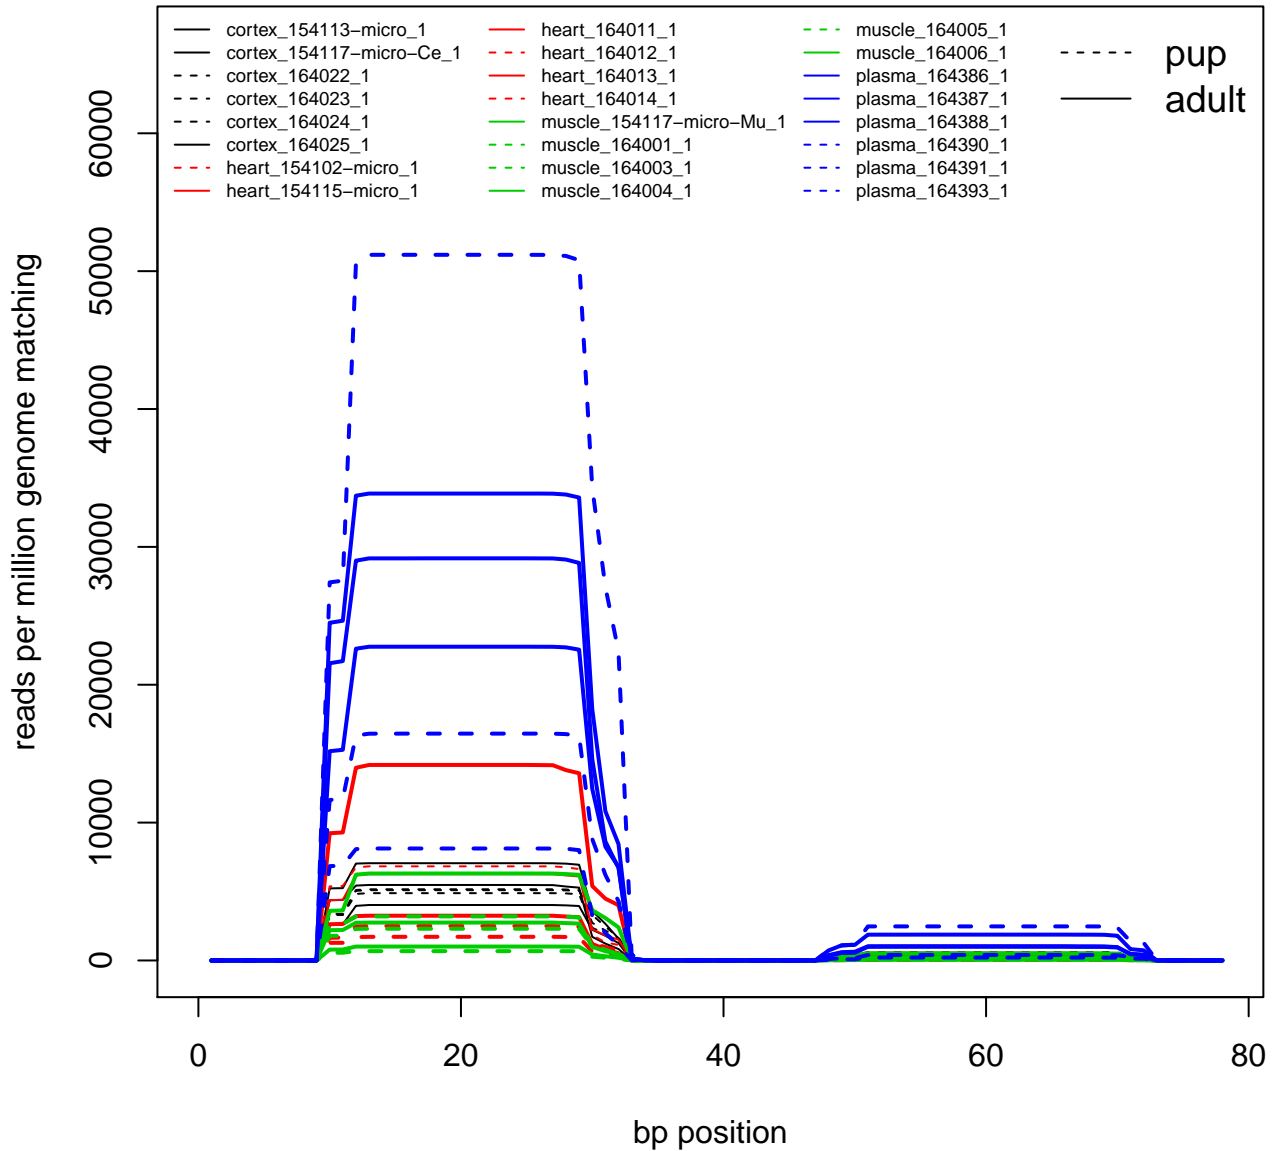

# novel\_121

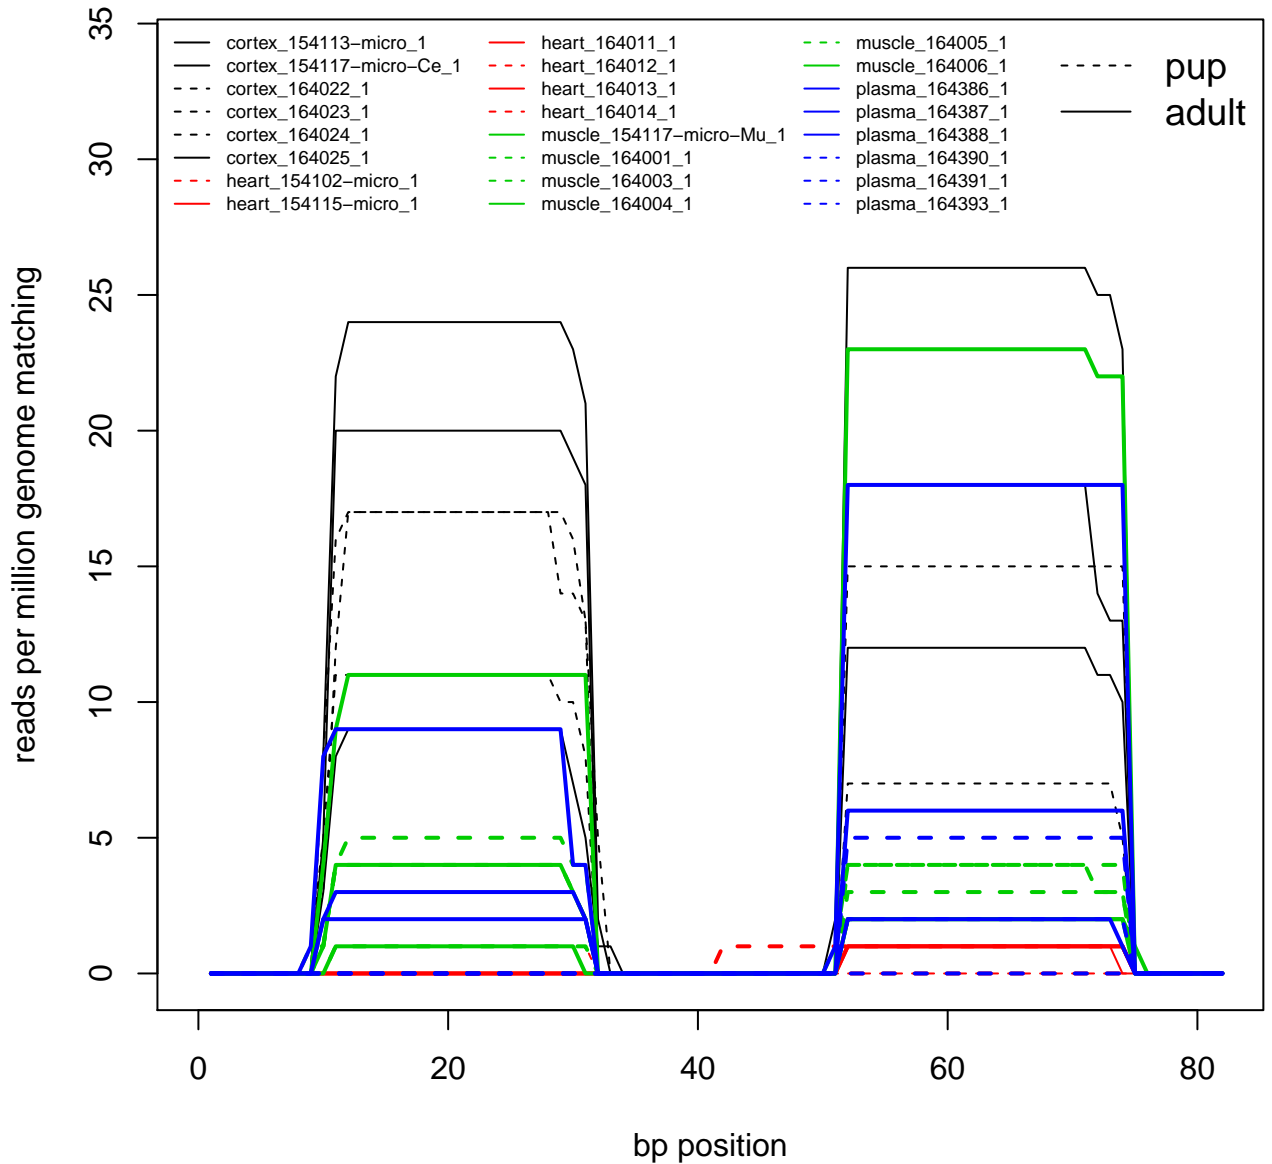

# lwe-miR-30b\_loc1

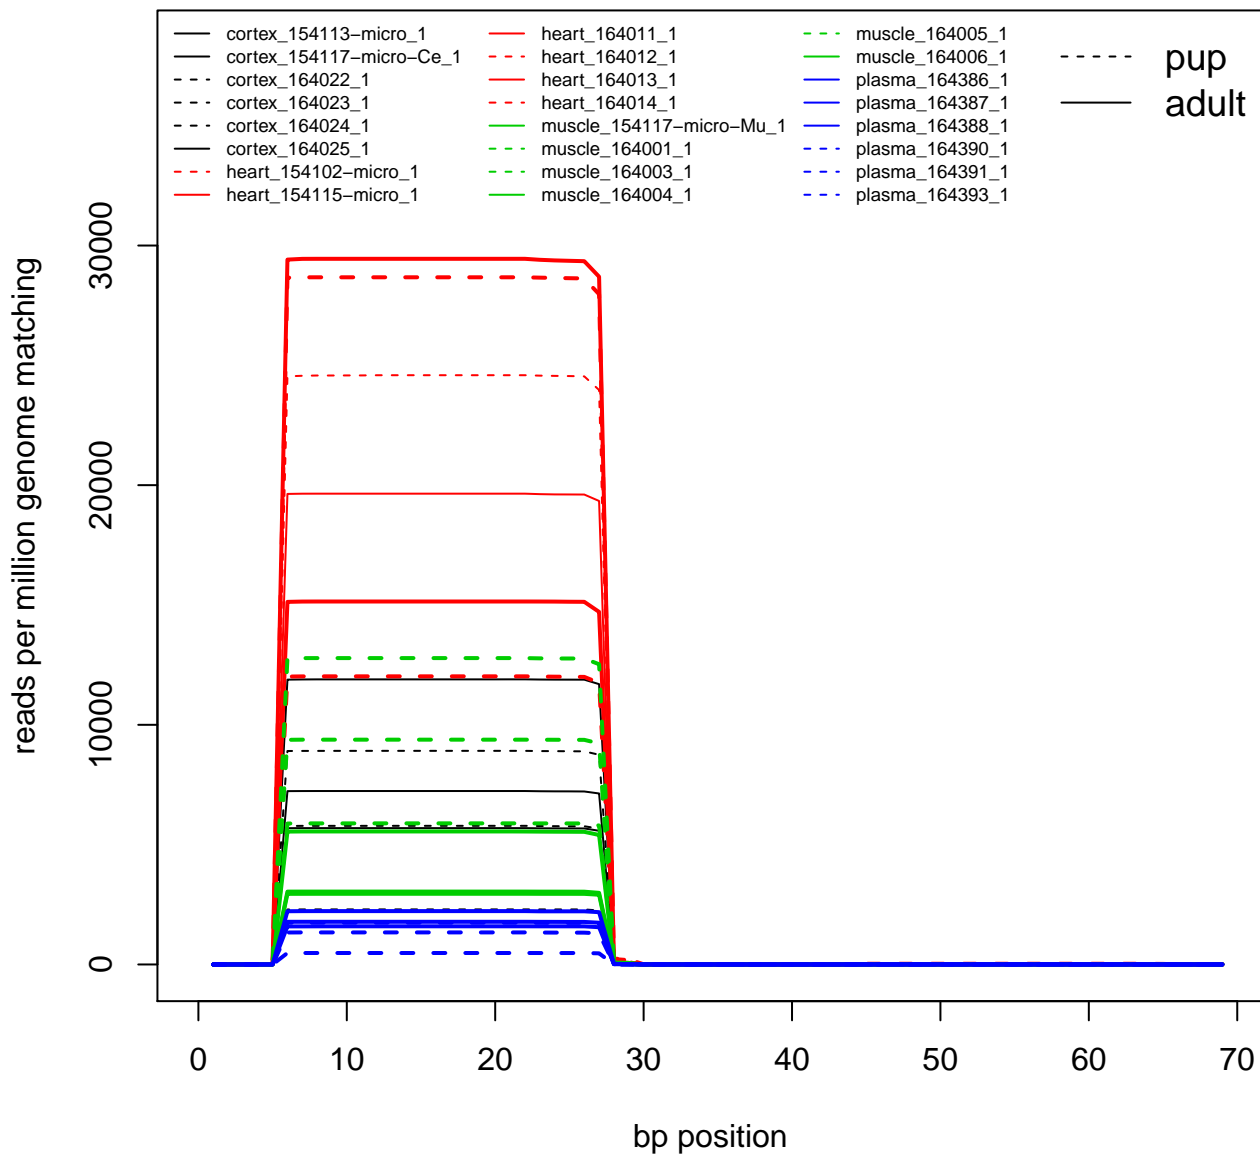

# lwe-miR-219\_loc3

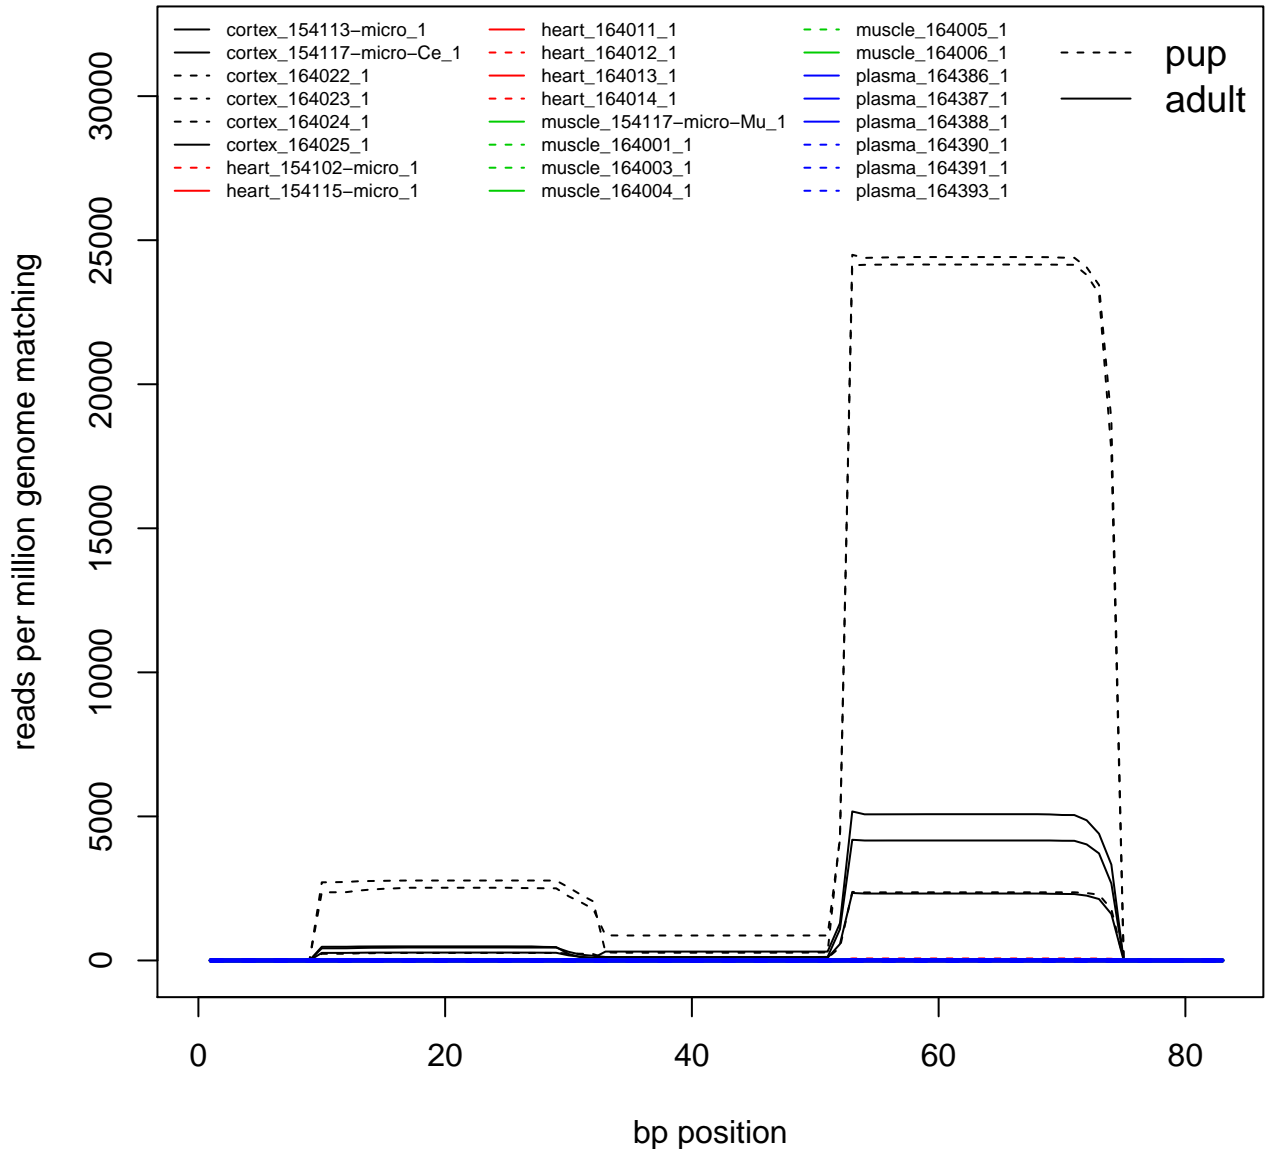

# lwe-miR-1388\_loc1

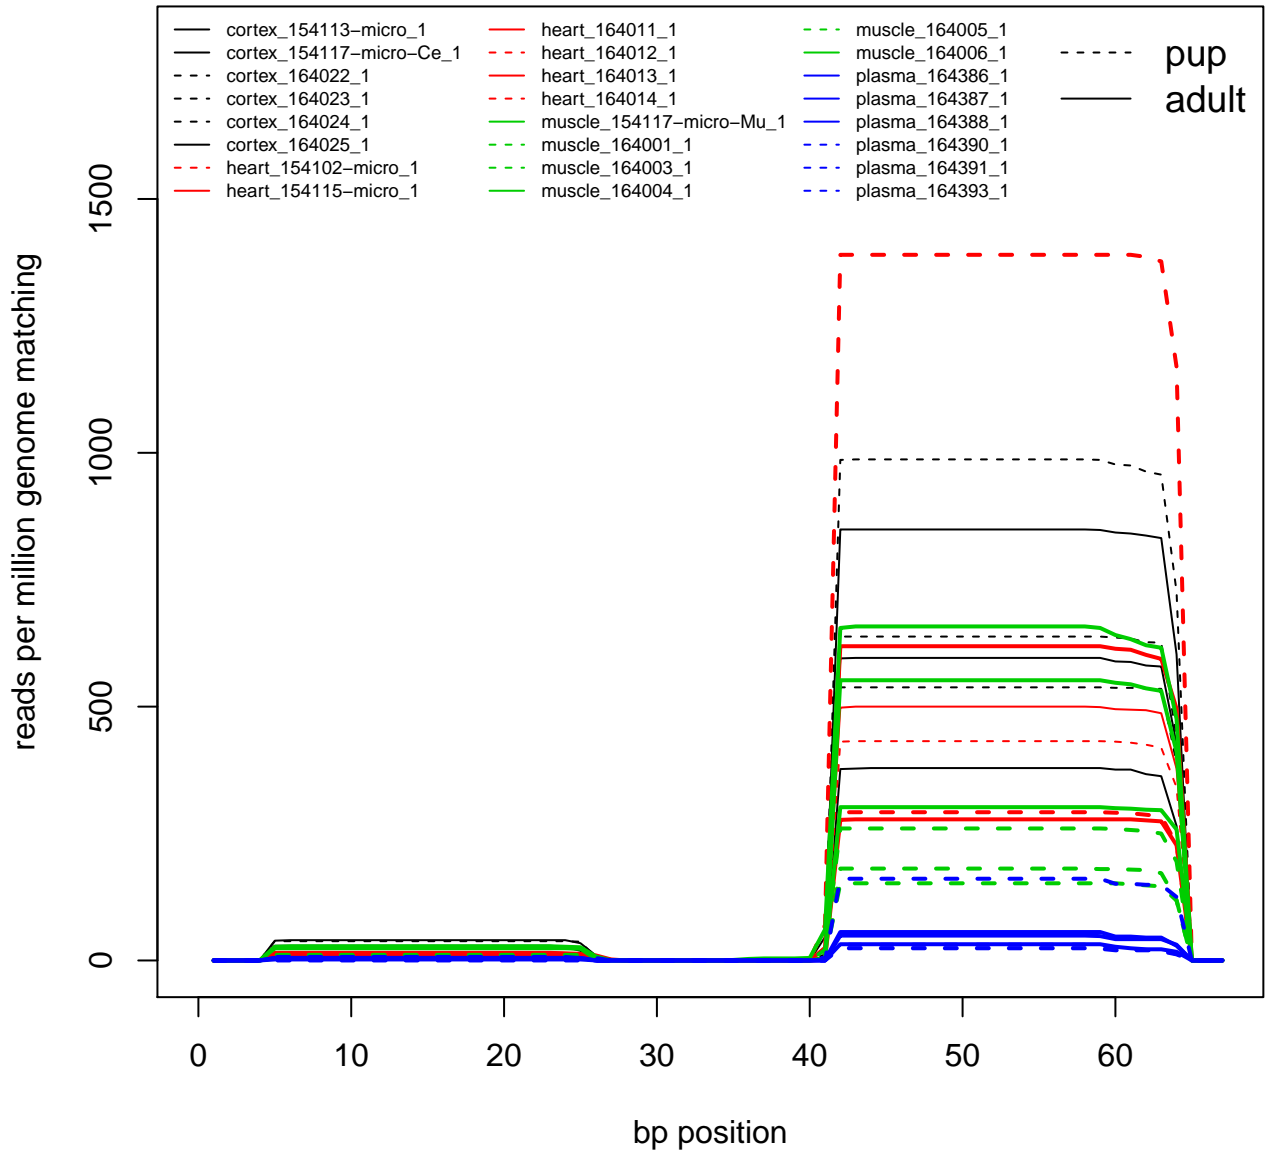

# lwe-miR-150\_loc1

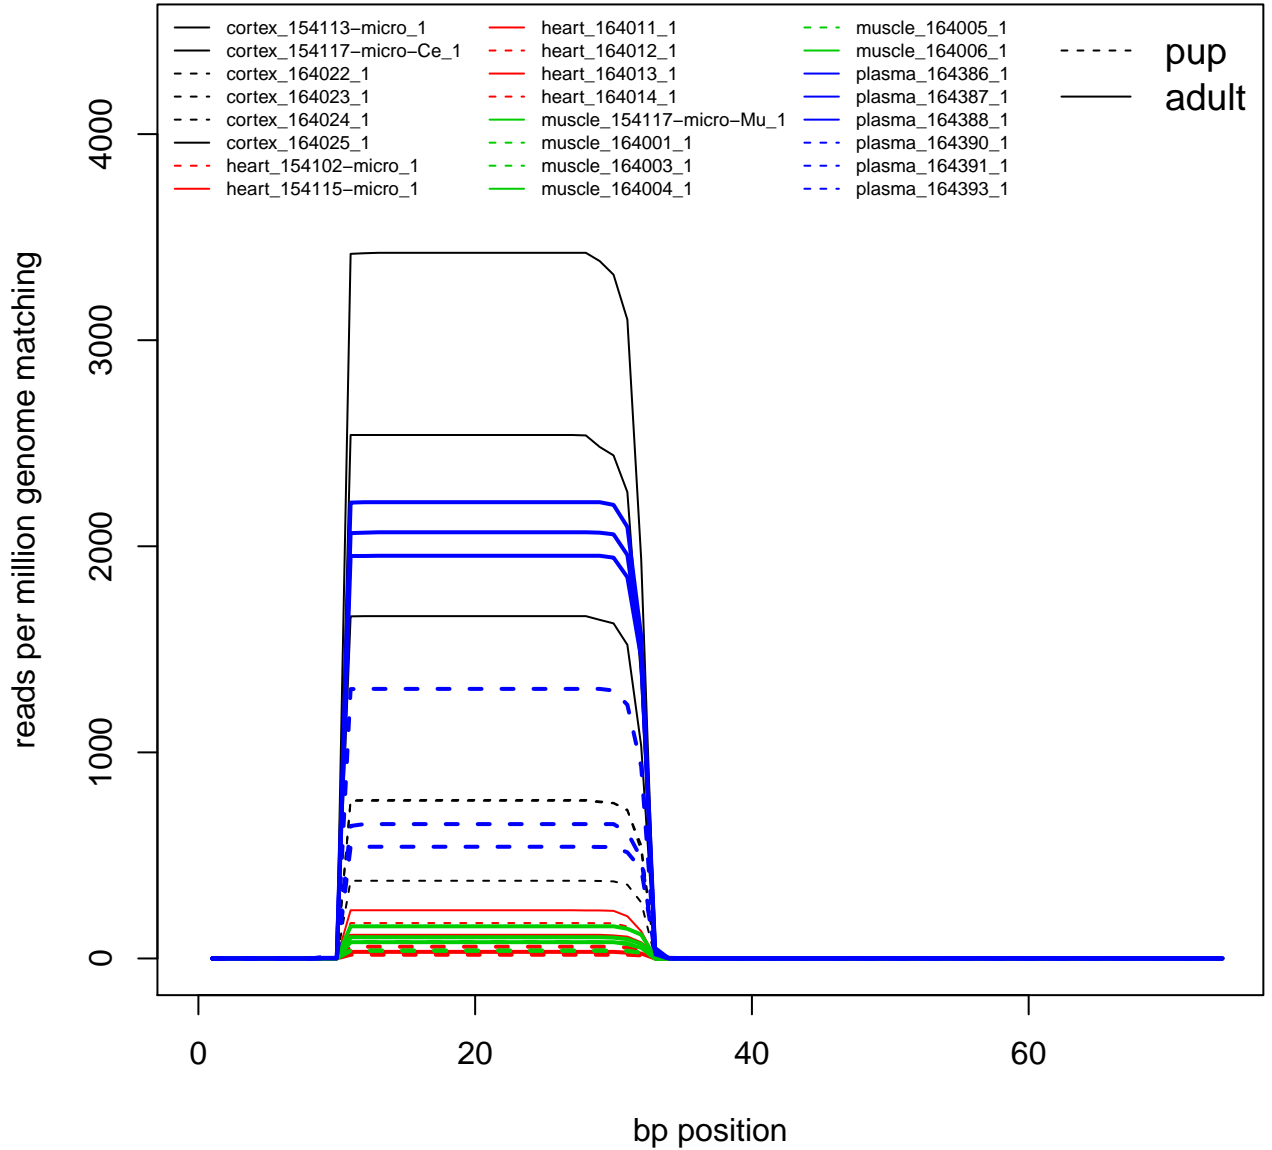

# lwe-miR-152\_loc1

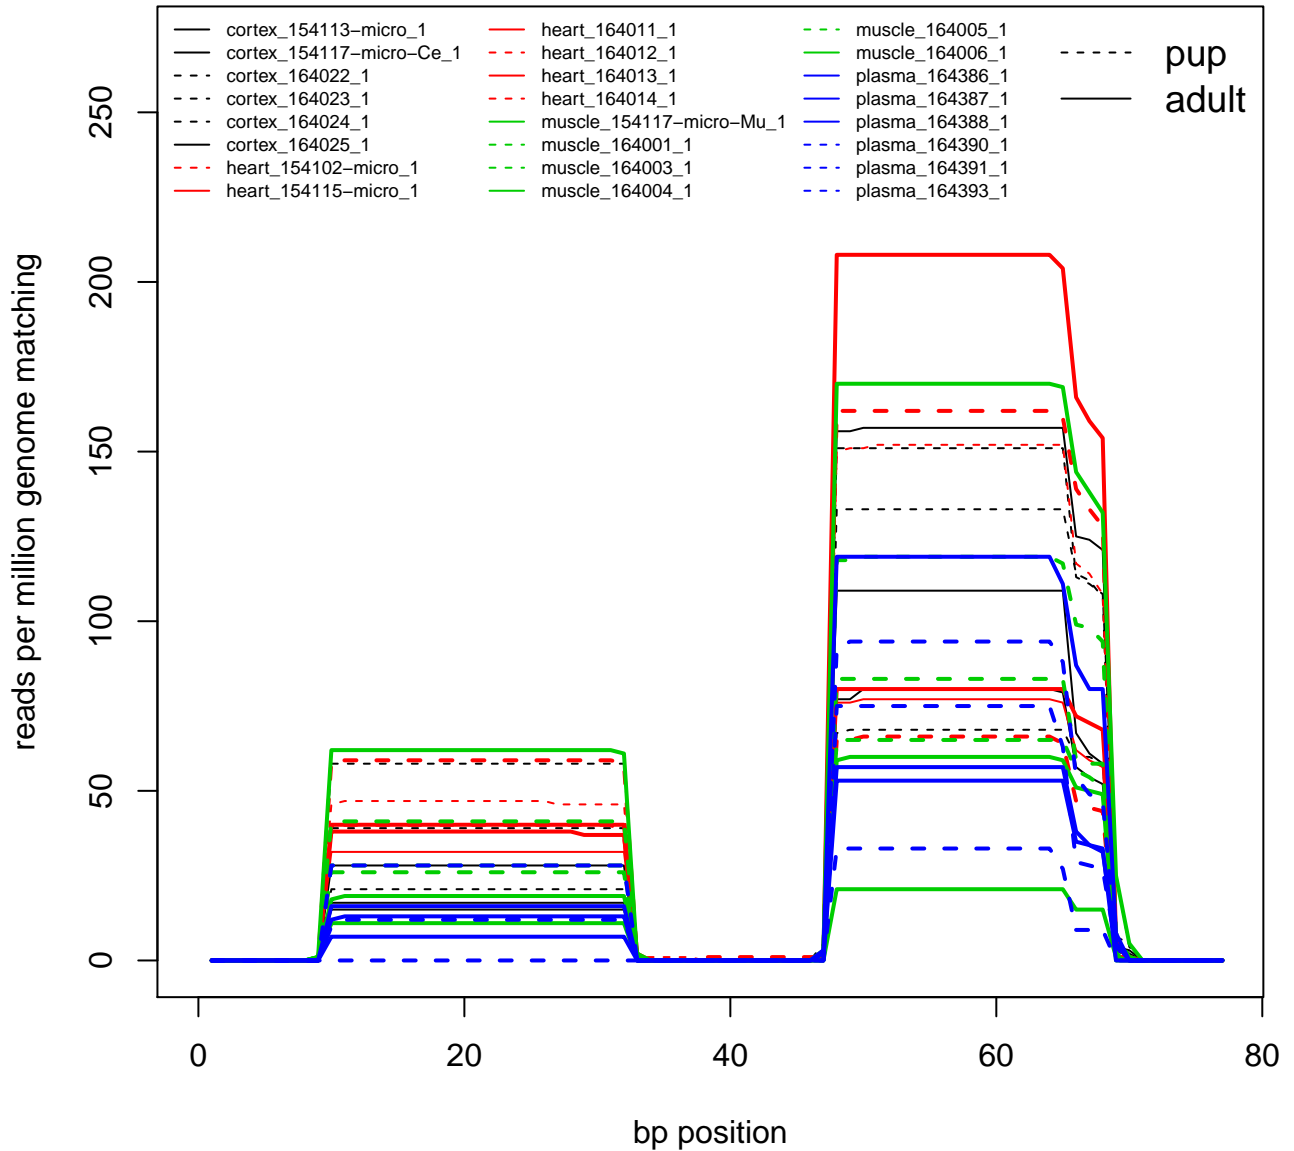

# lwe-miR-1842\_loc1

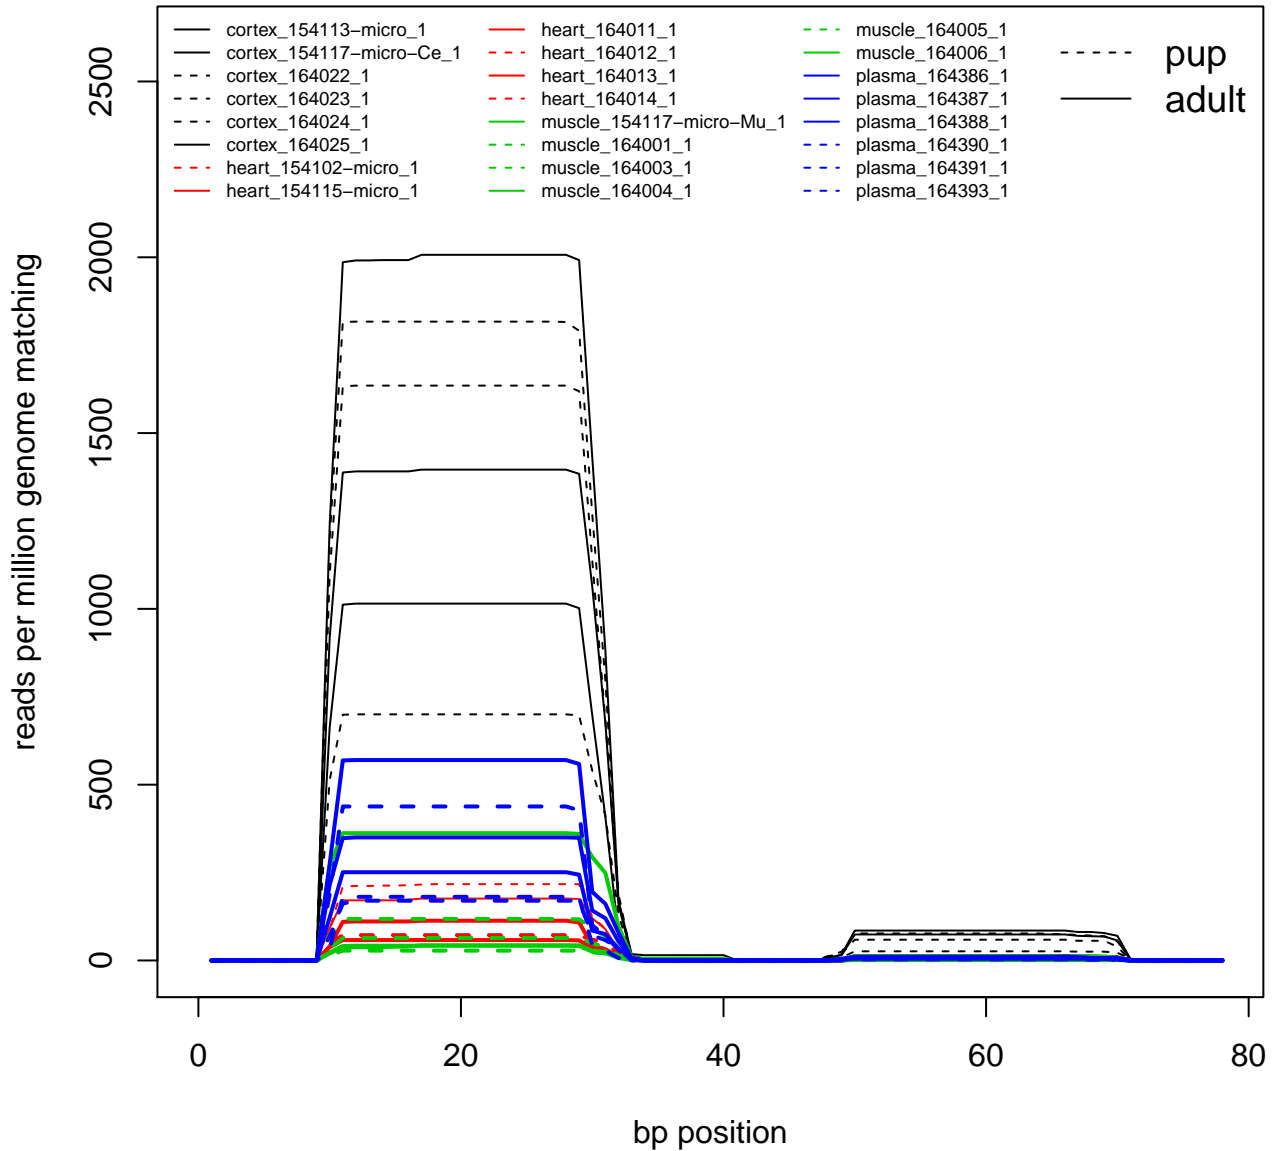



# lwe-miR-133\_loc3

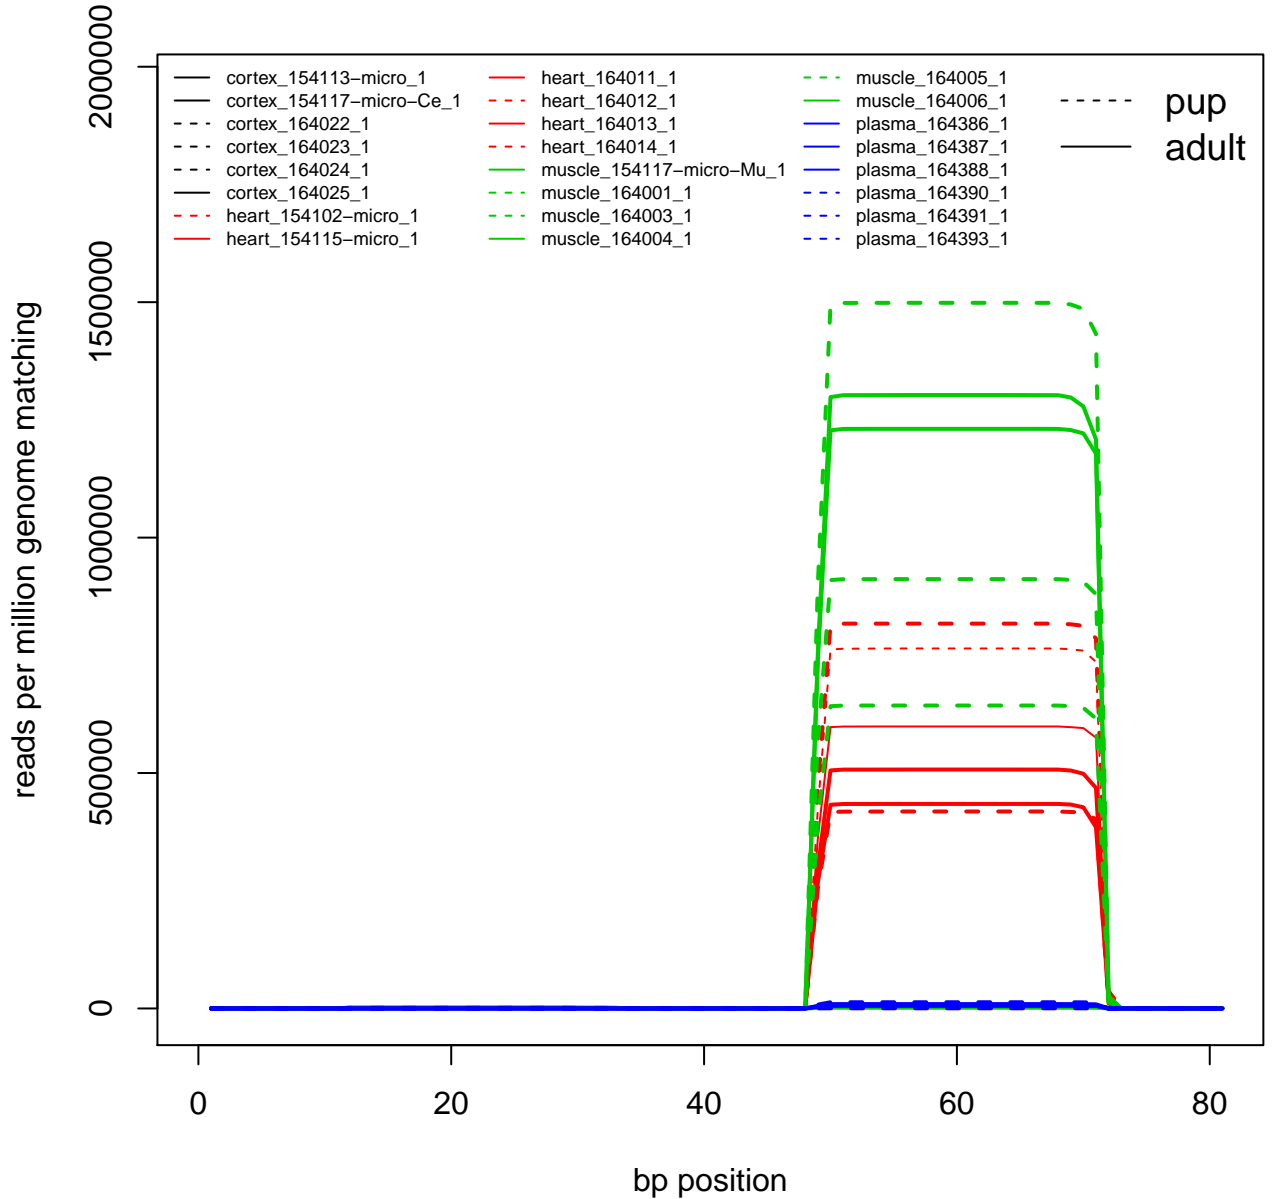



# lwe-miR-493b\_loc1

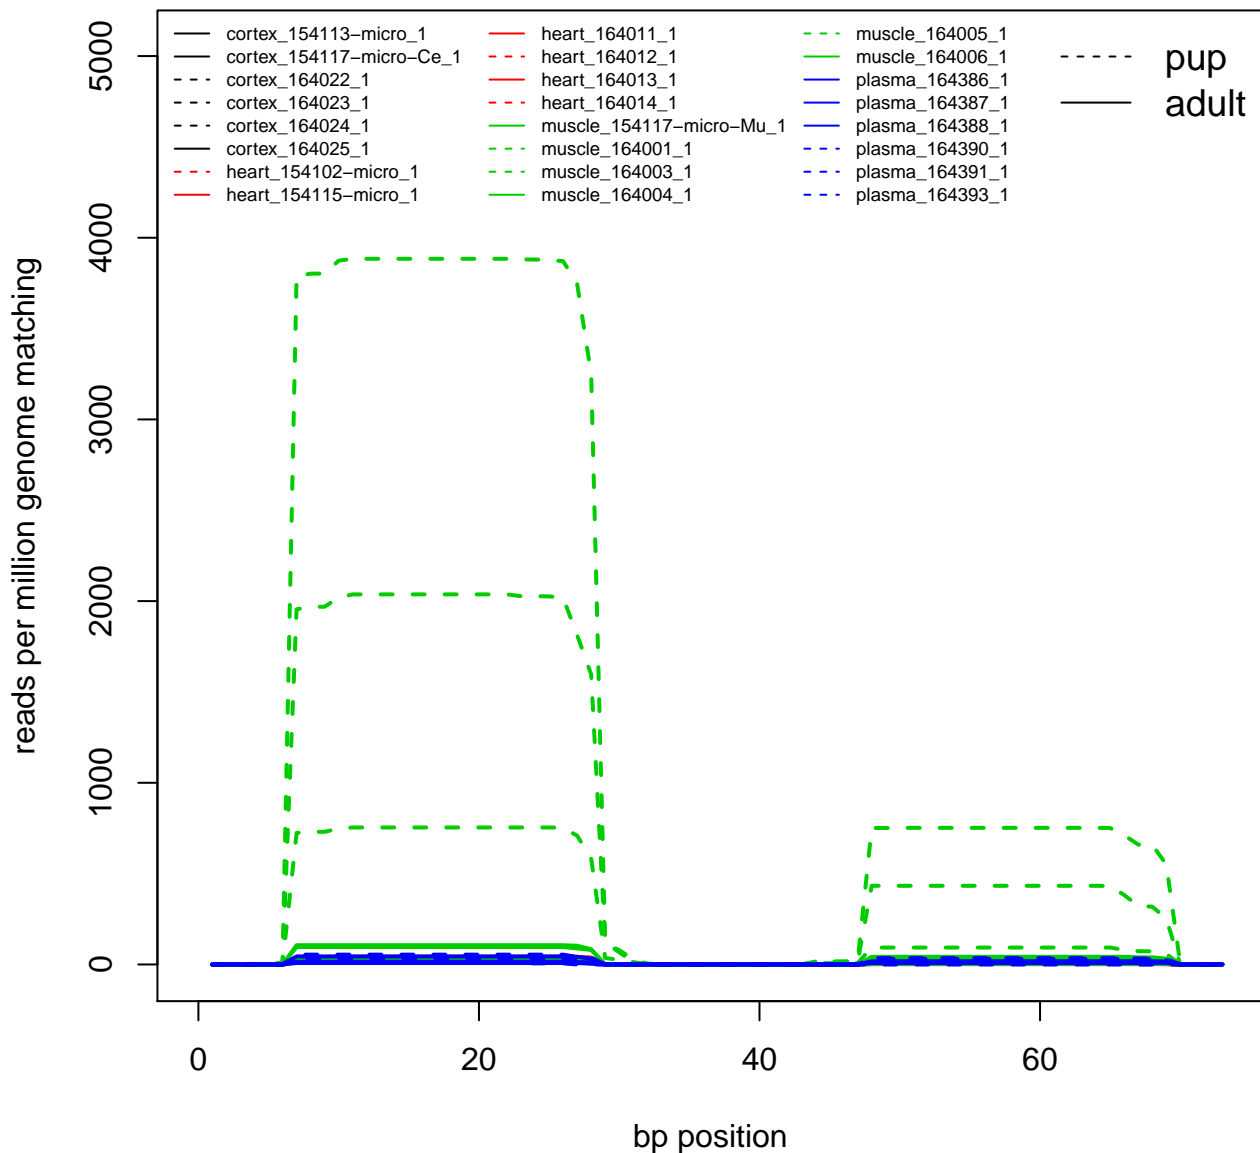

# lwe-miR-431\_loc1

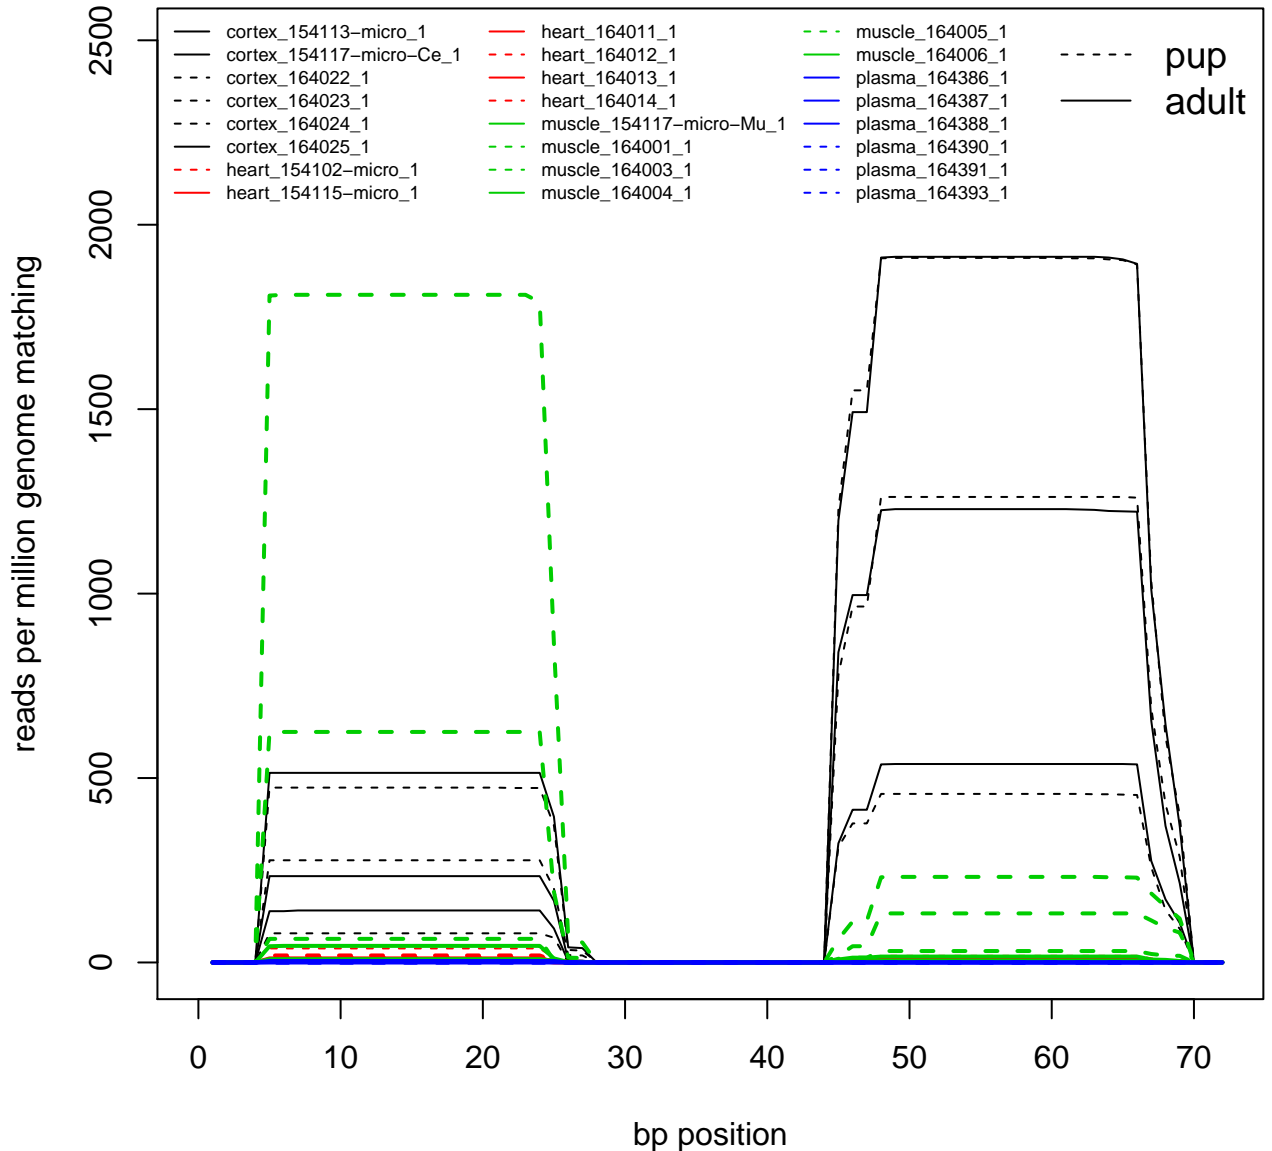

# lwe-miR-370\_loc1

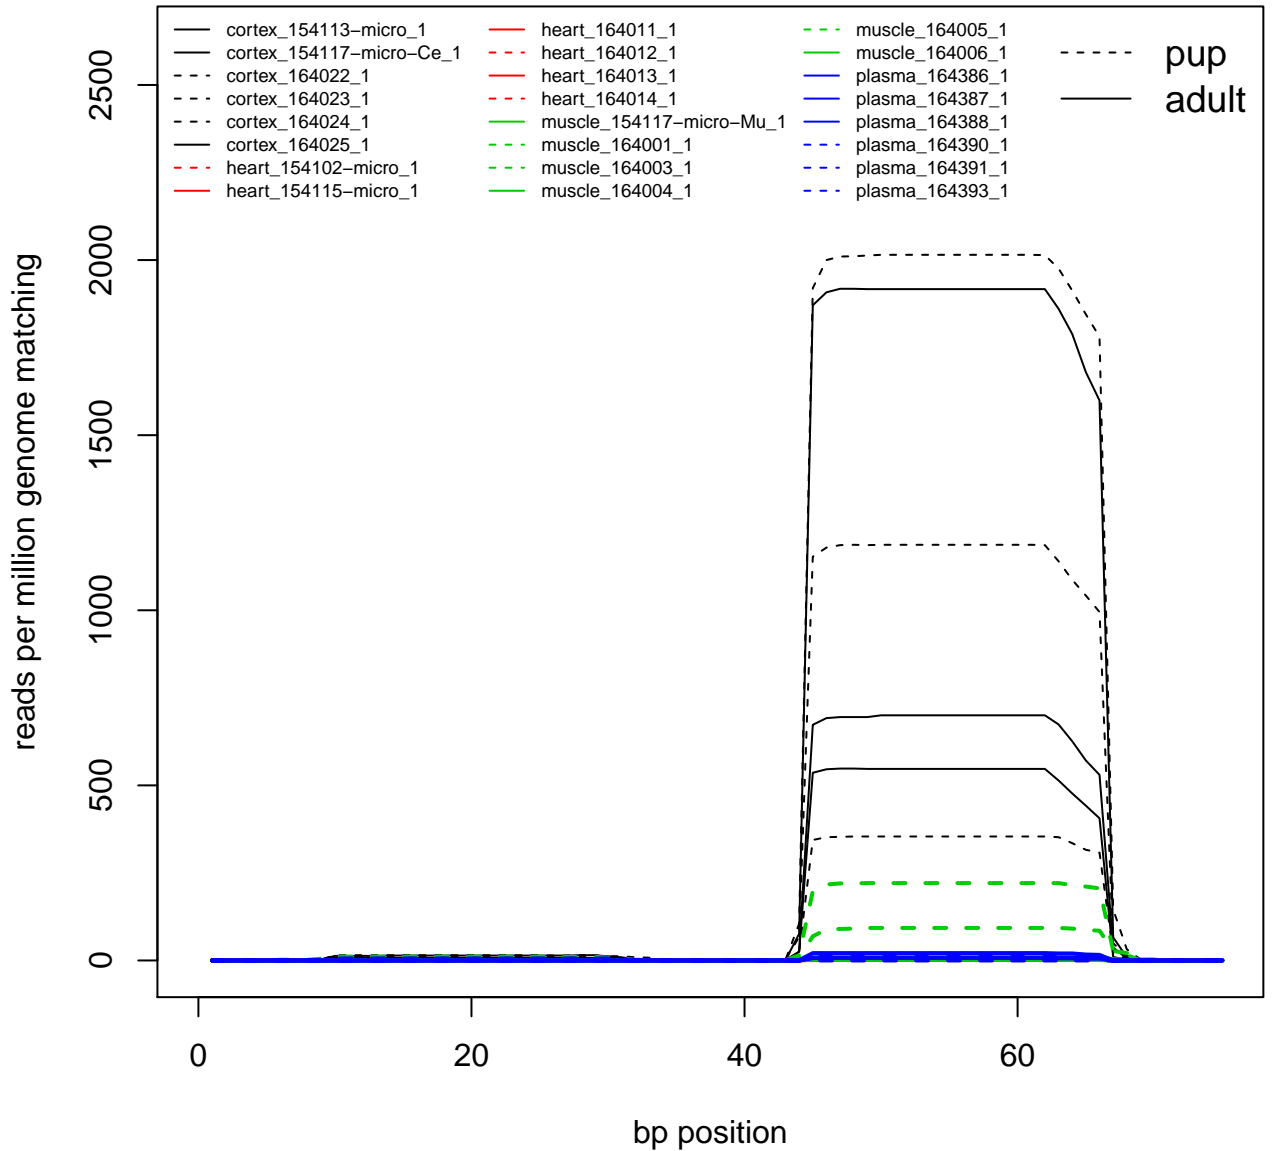

# lwe-miR-196\_loc2

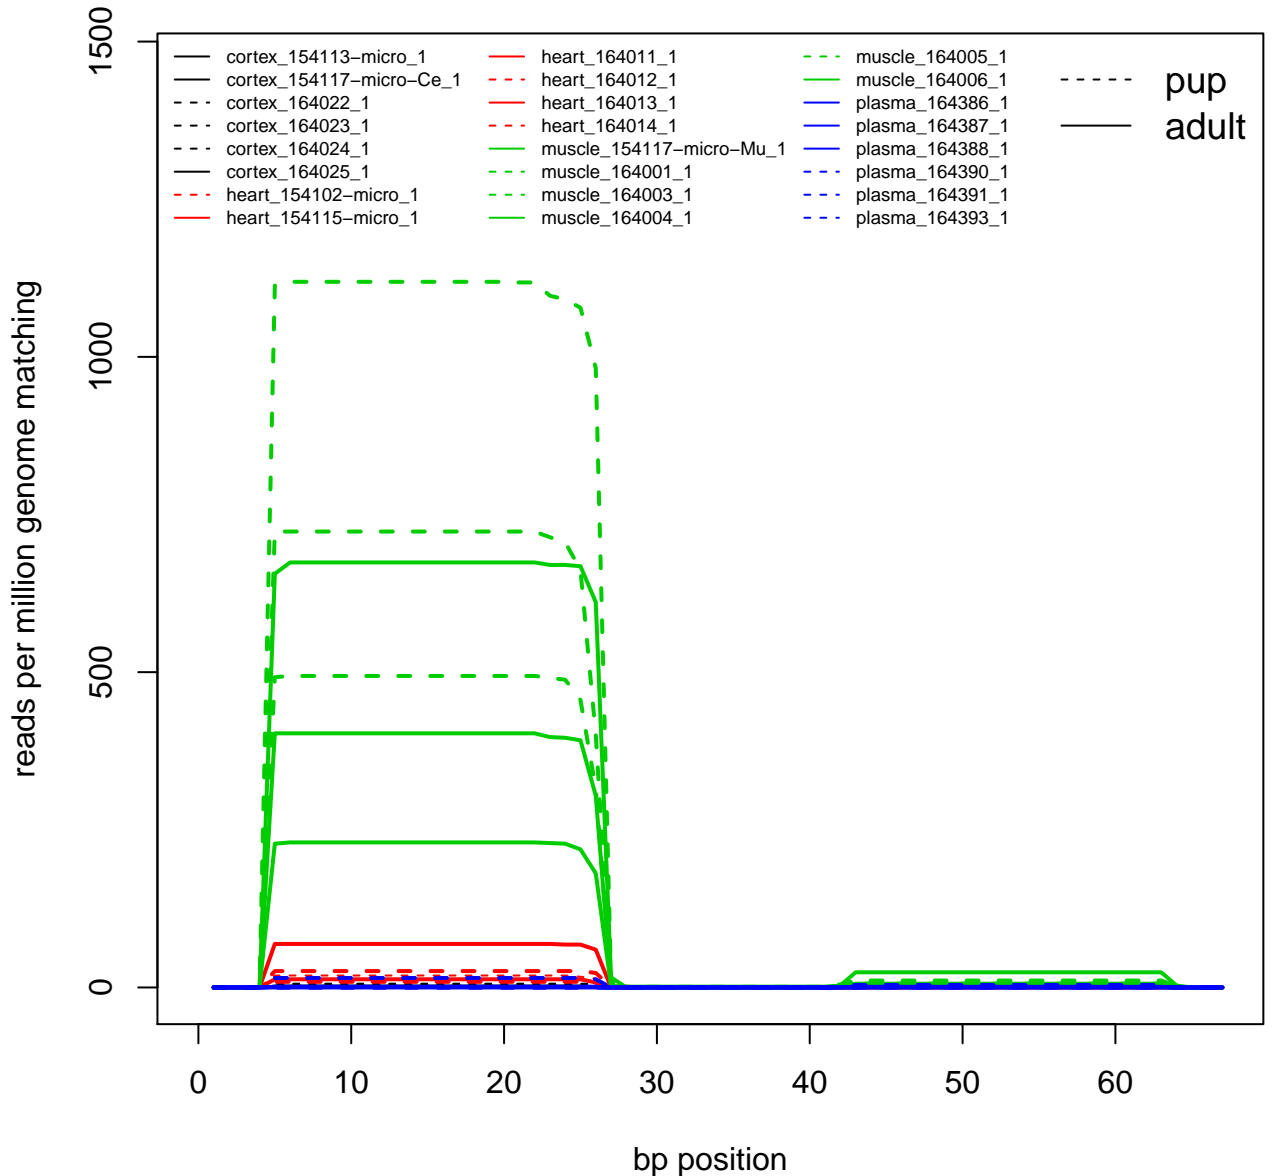

# lwe-miR-10a\_loc1

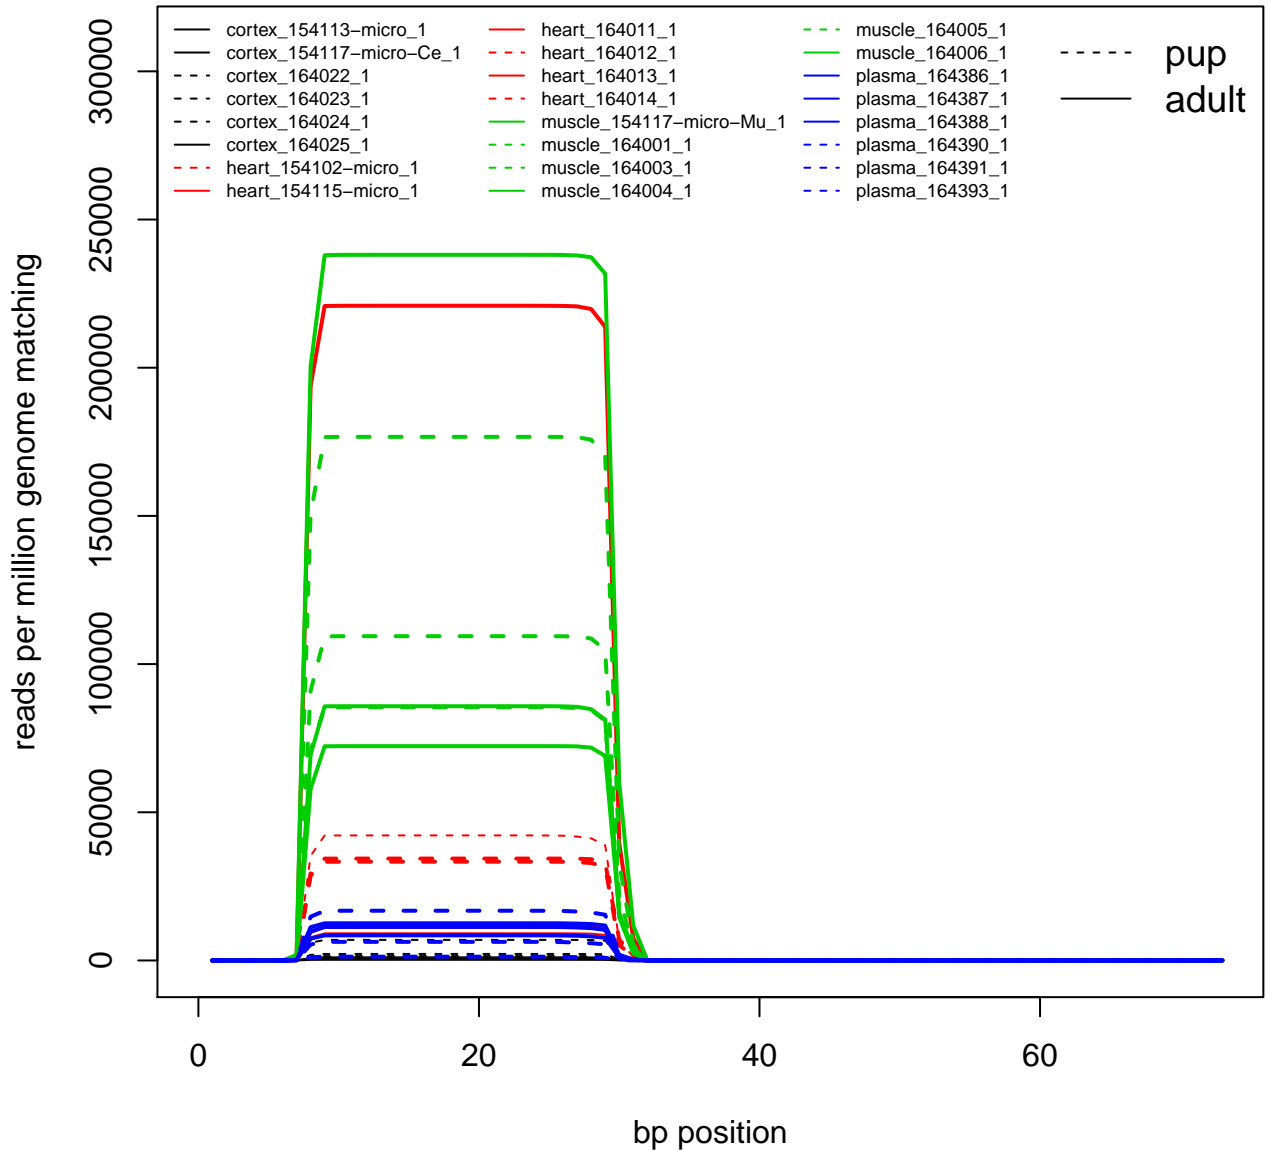







# lwe-miR-183\_loc1

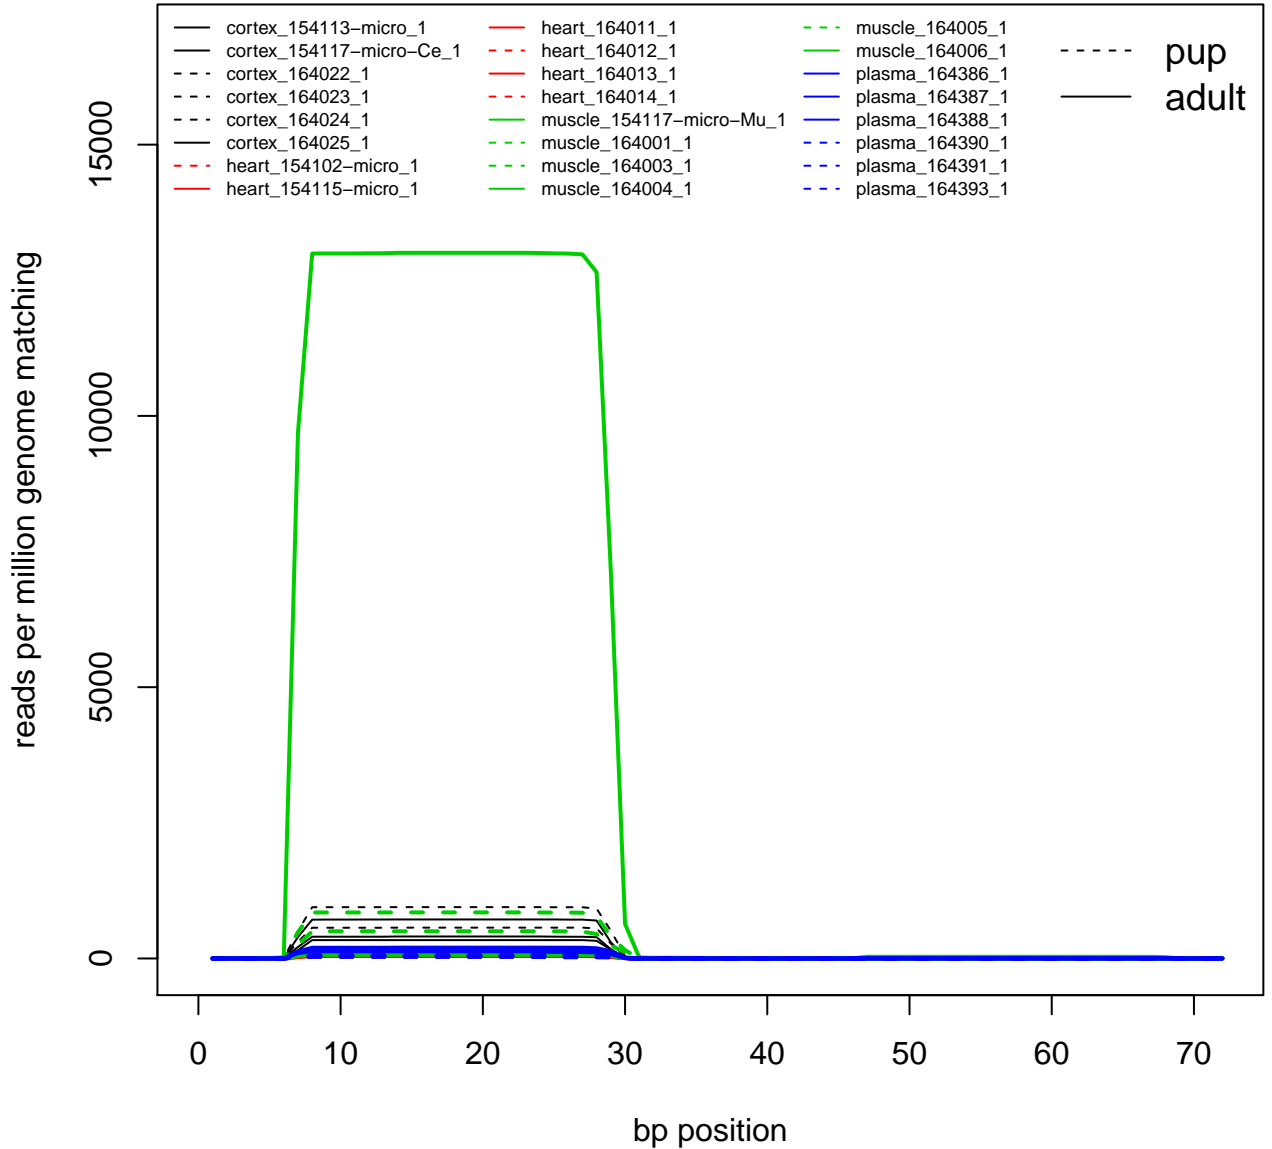

# novel\_123

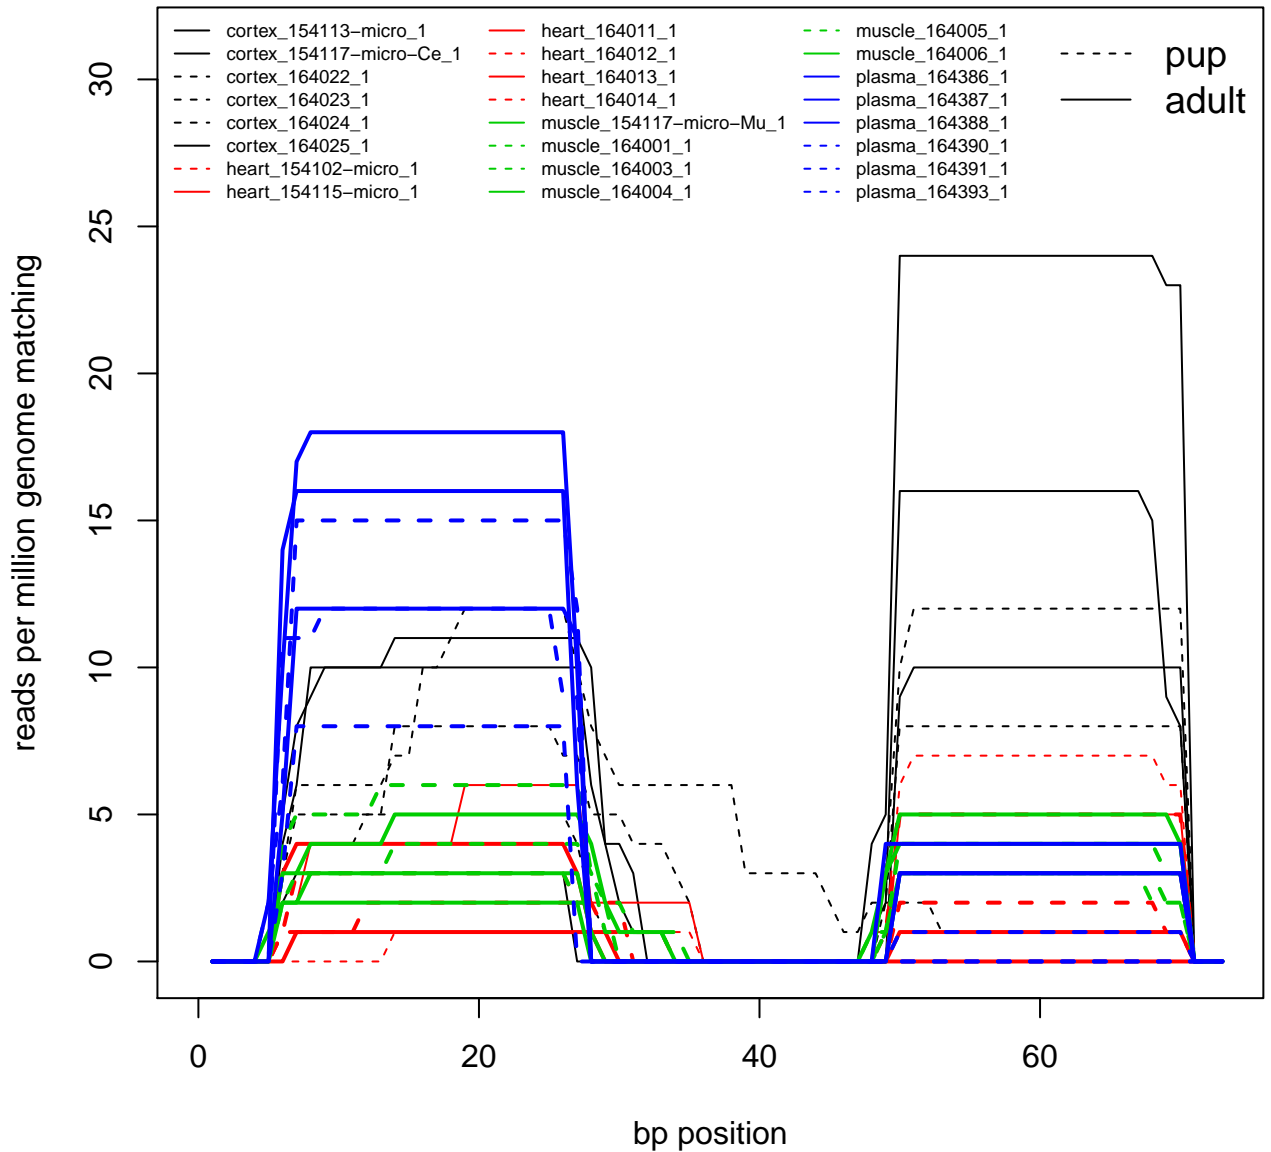



# lwe-miR-885\_loc1

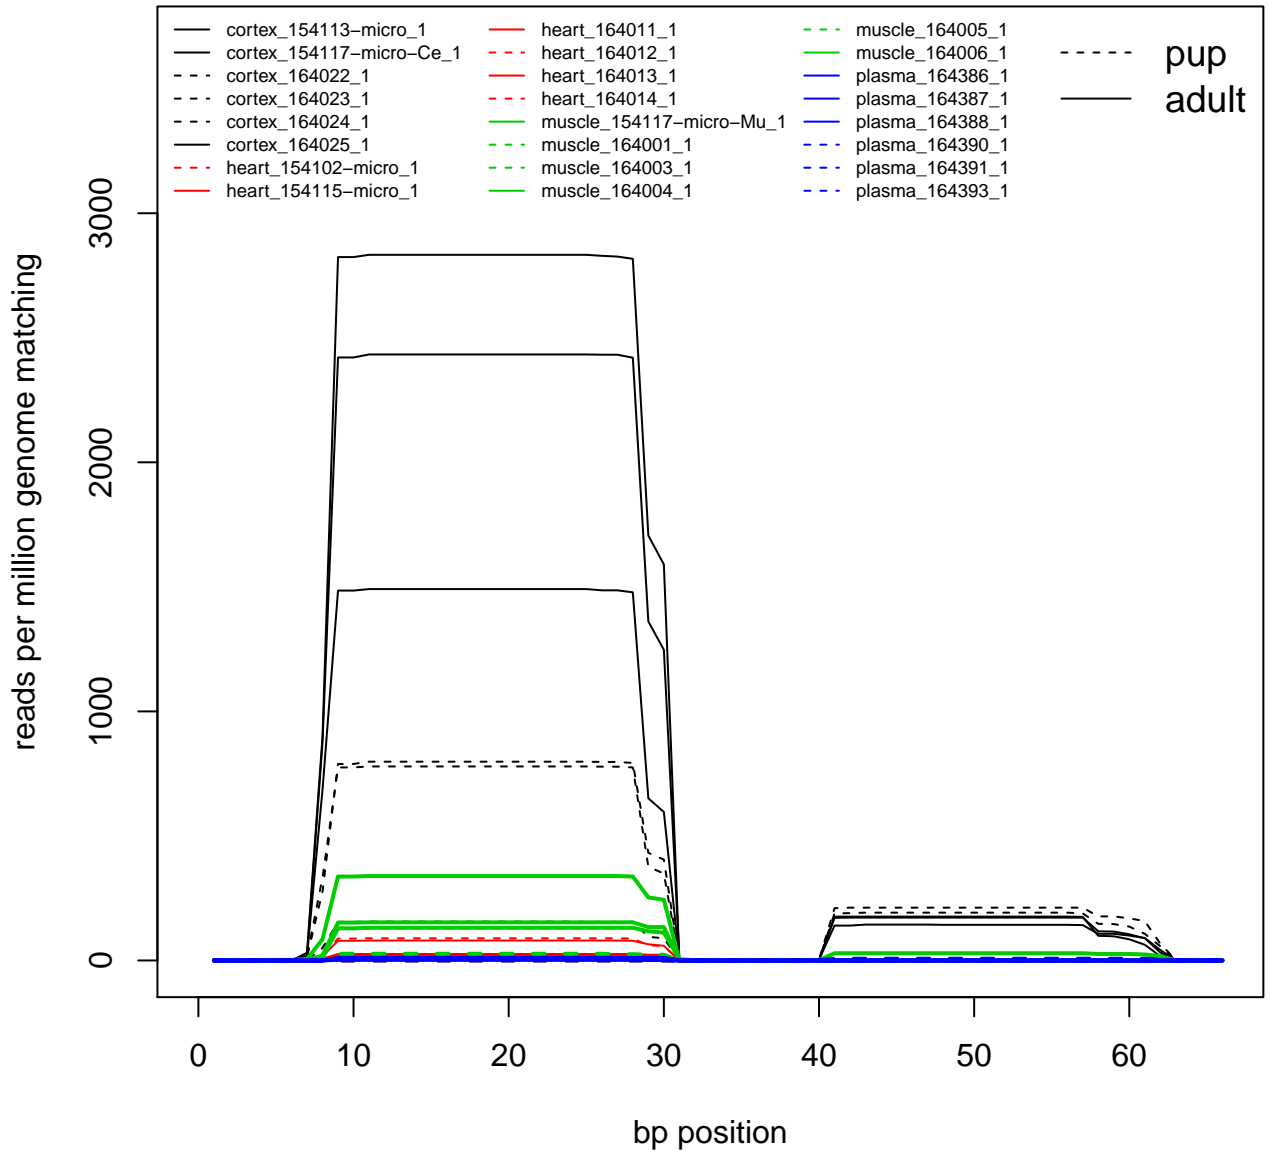

# lwe-miR-3958\_loc1

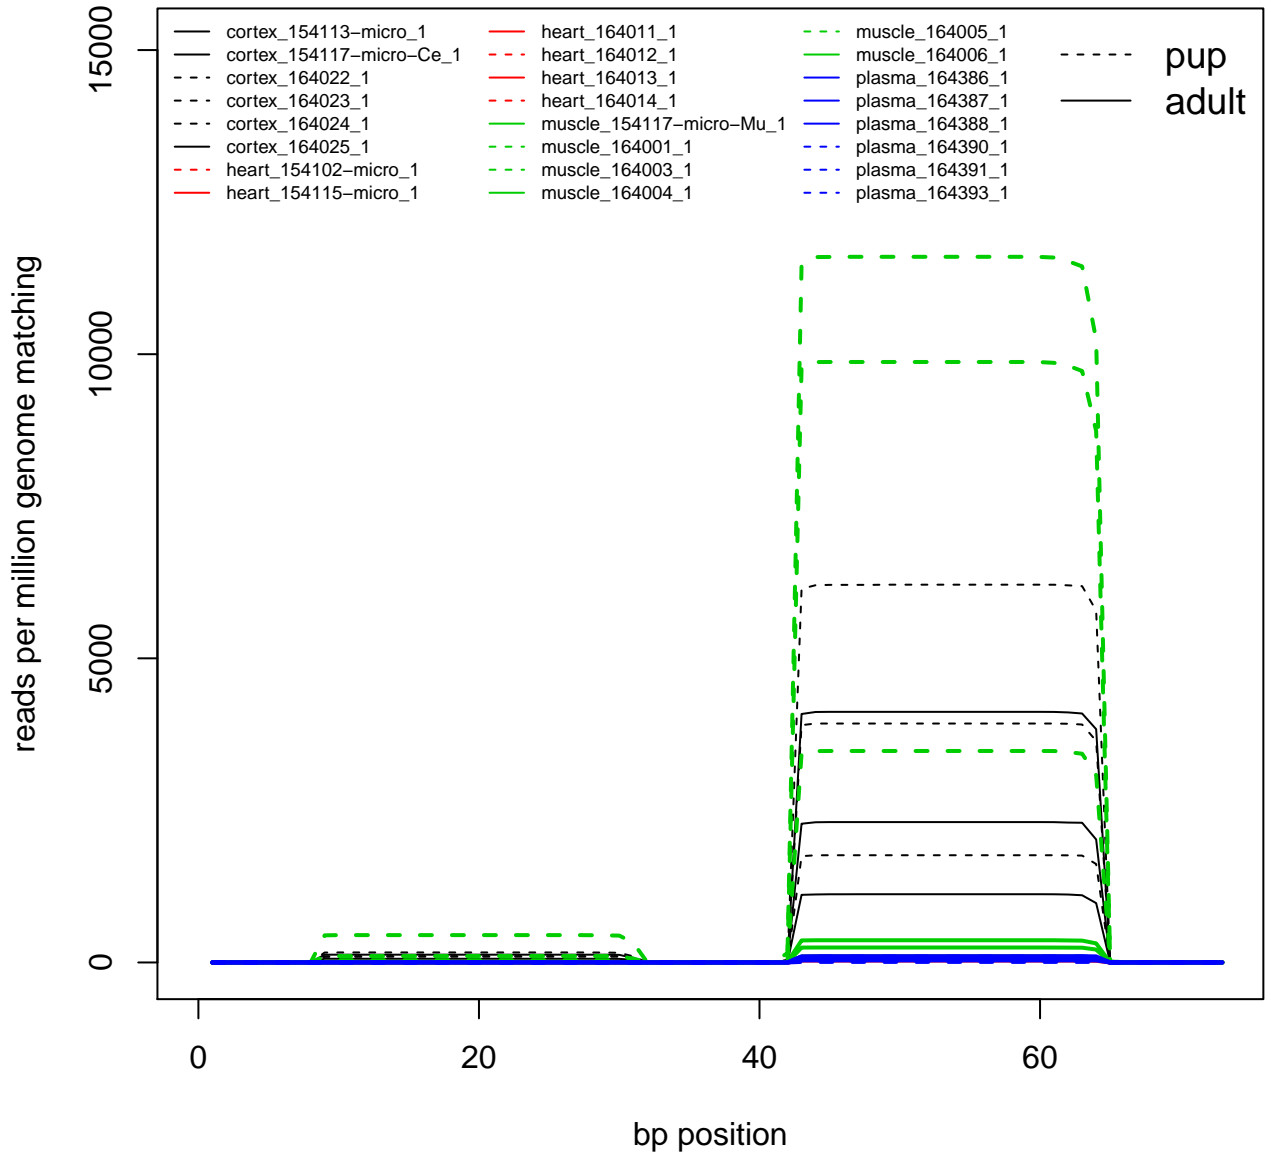

# novel\_125

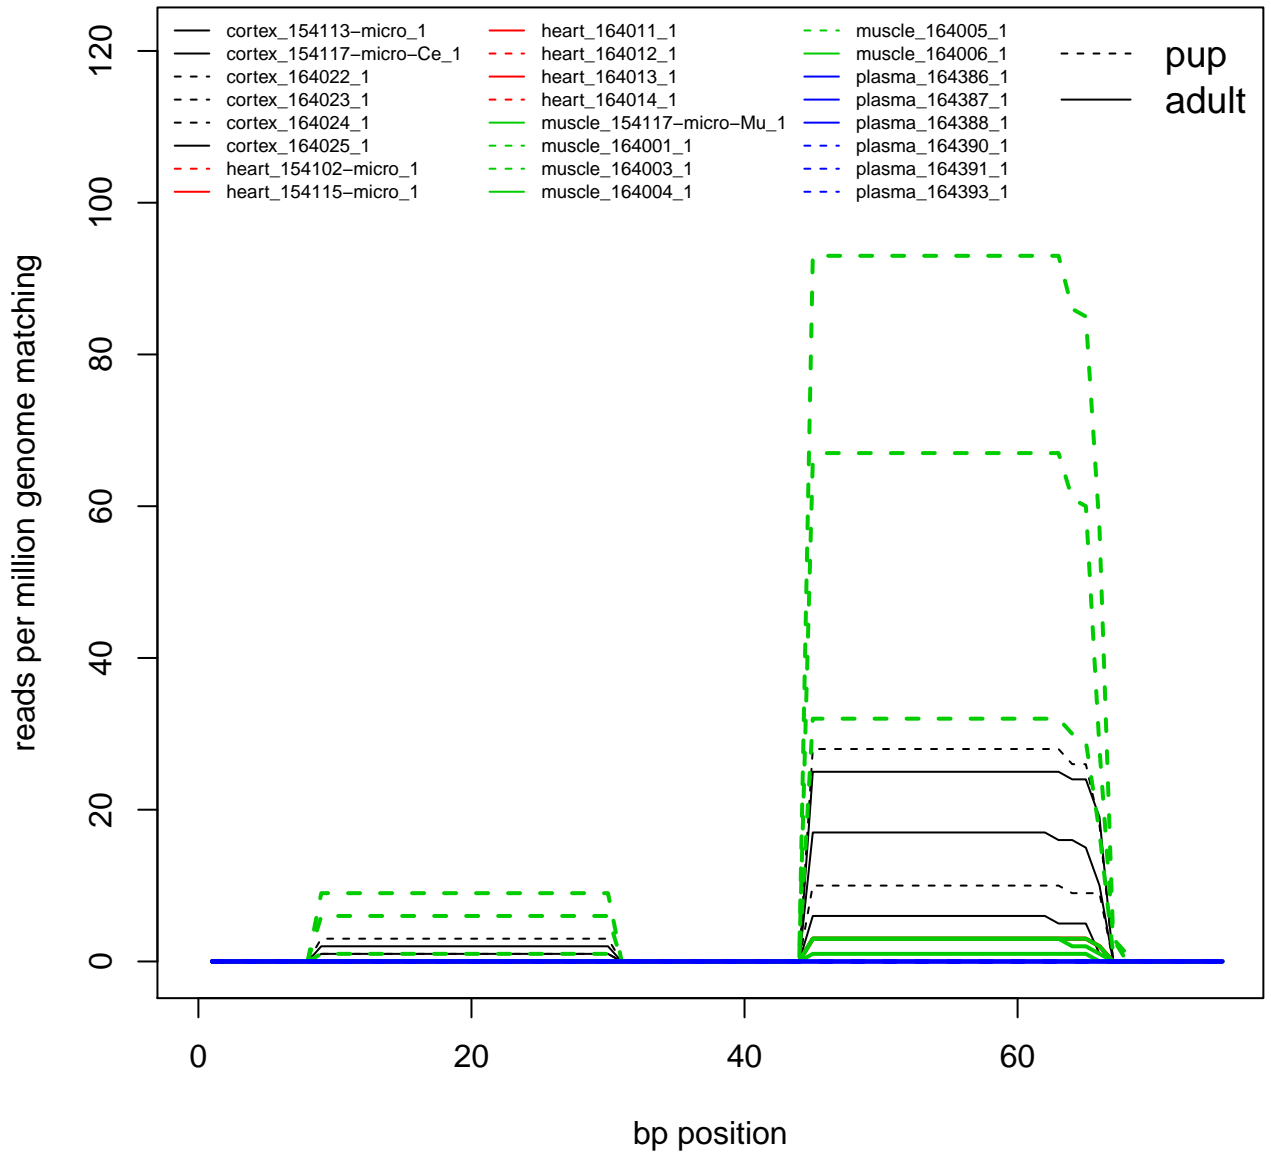

# lwe-miR-495\_loc1

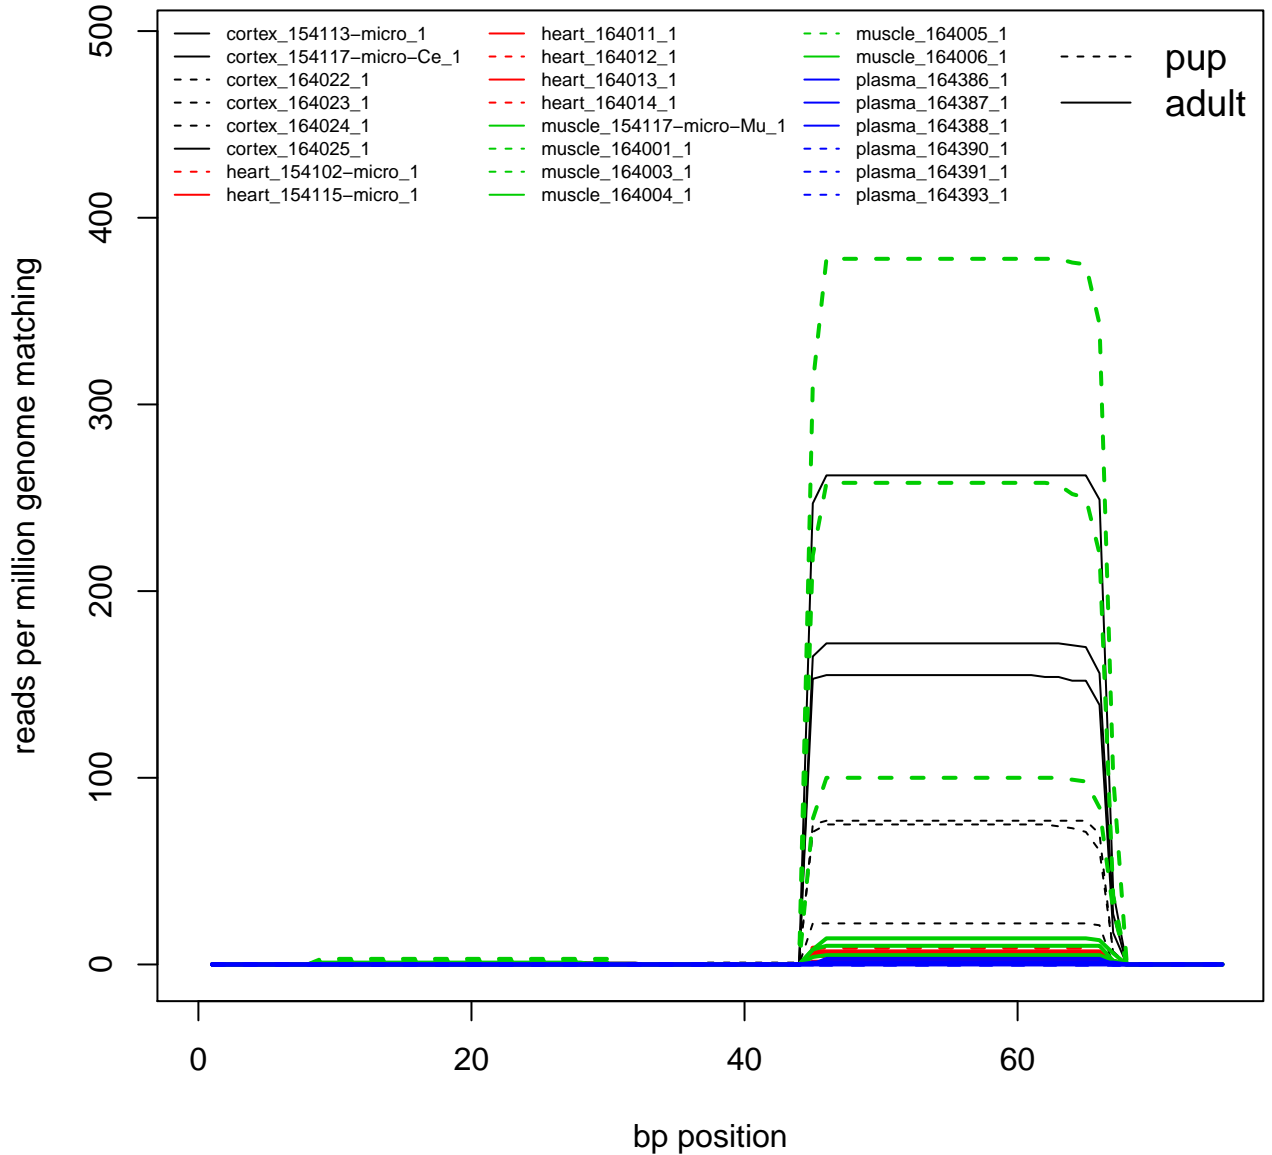



# lwe-miR-494\_loc1

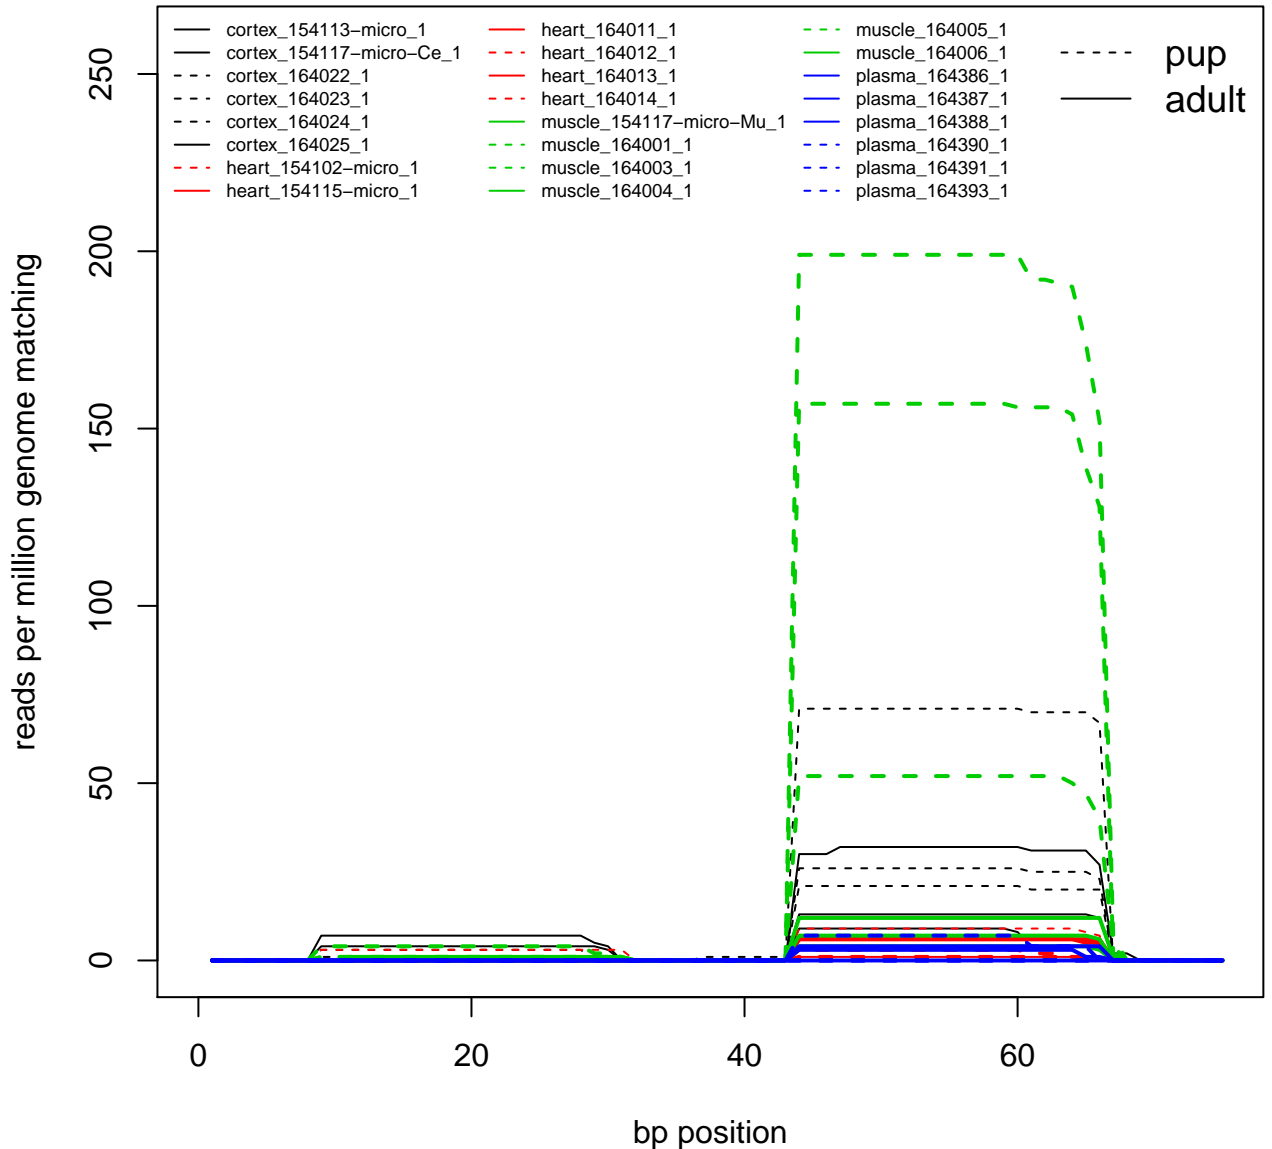

# lwe-miR-329\_loc1

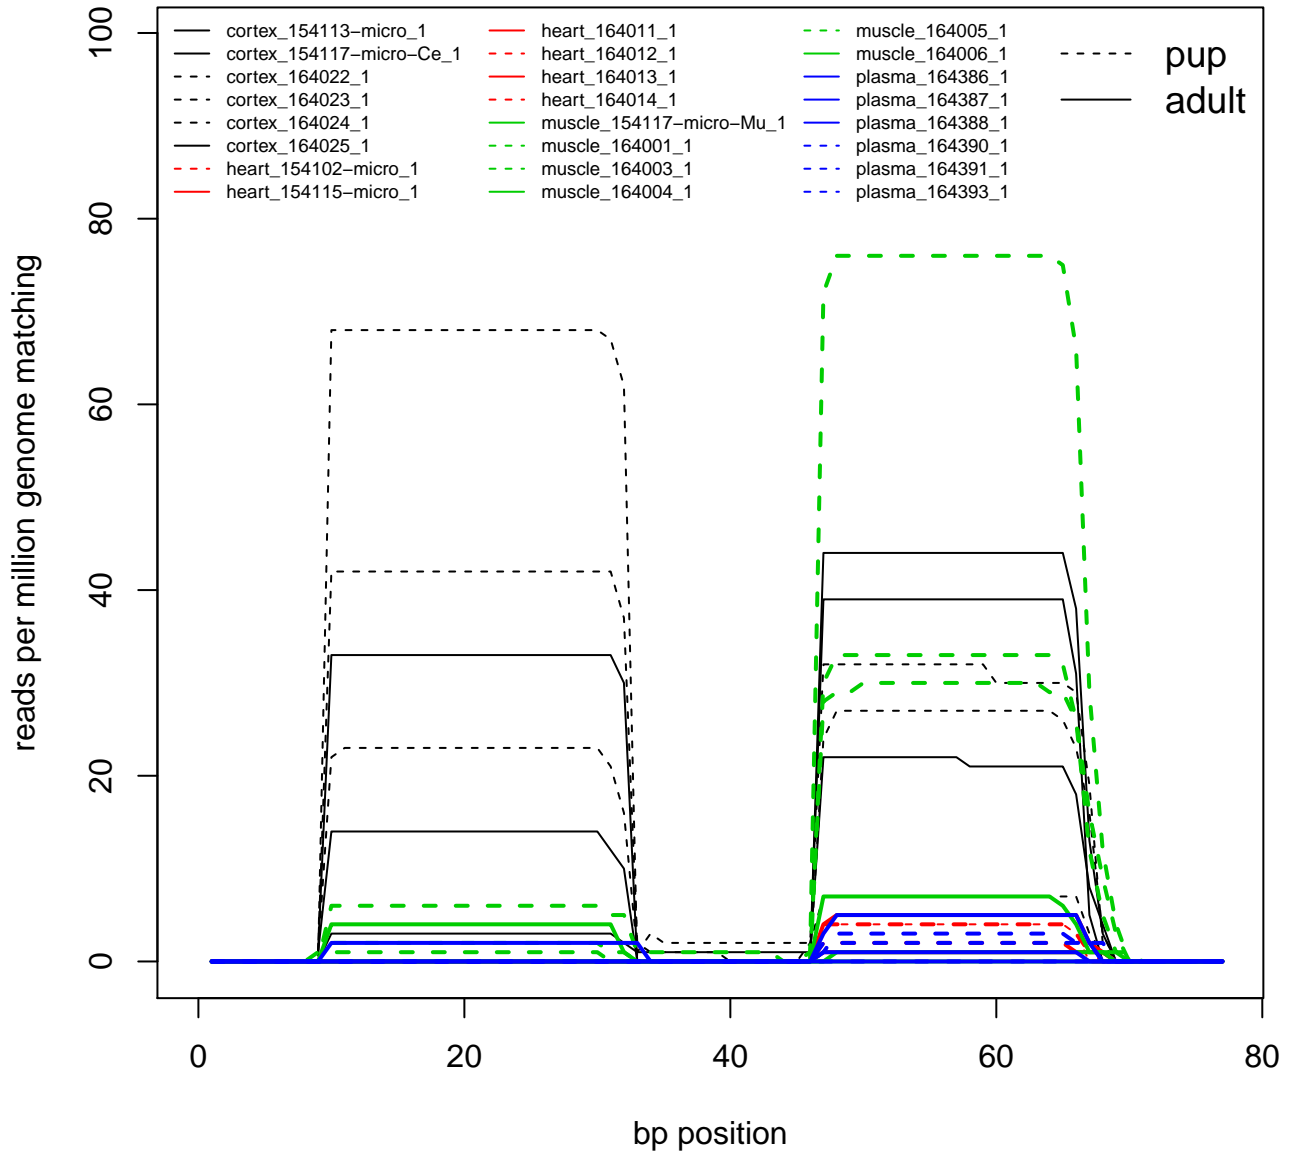

# lwe-miR-758\_loc1

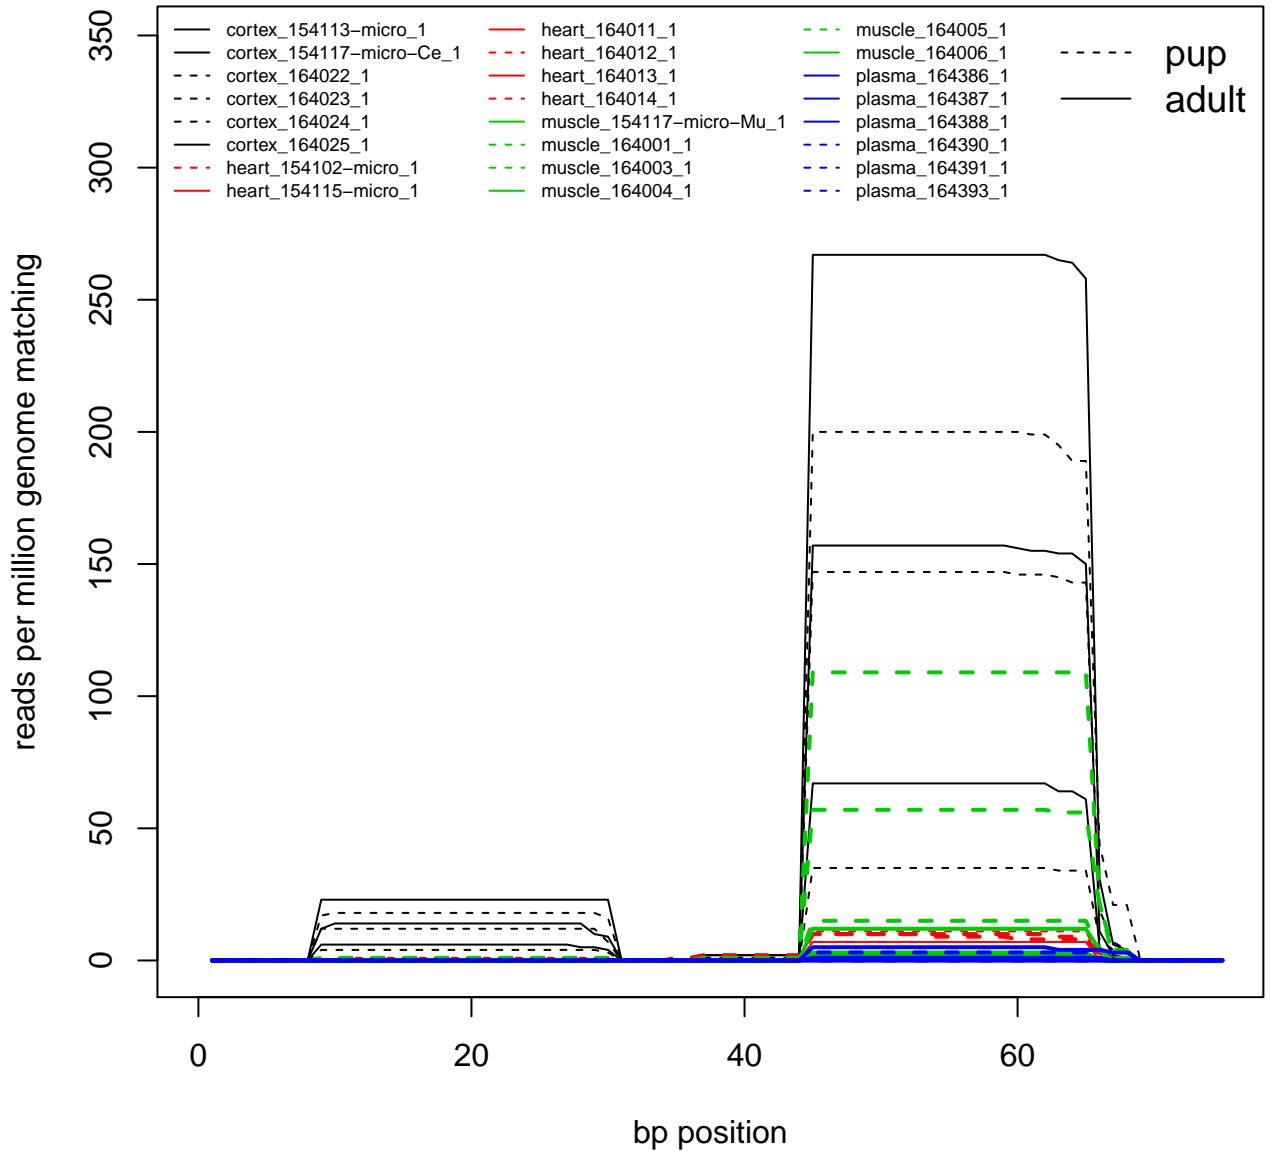

# lwe-miR-323\_loc1

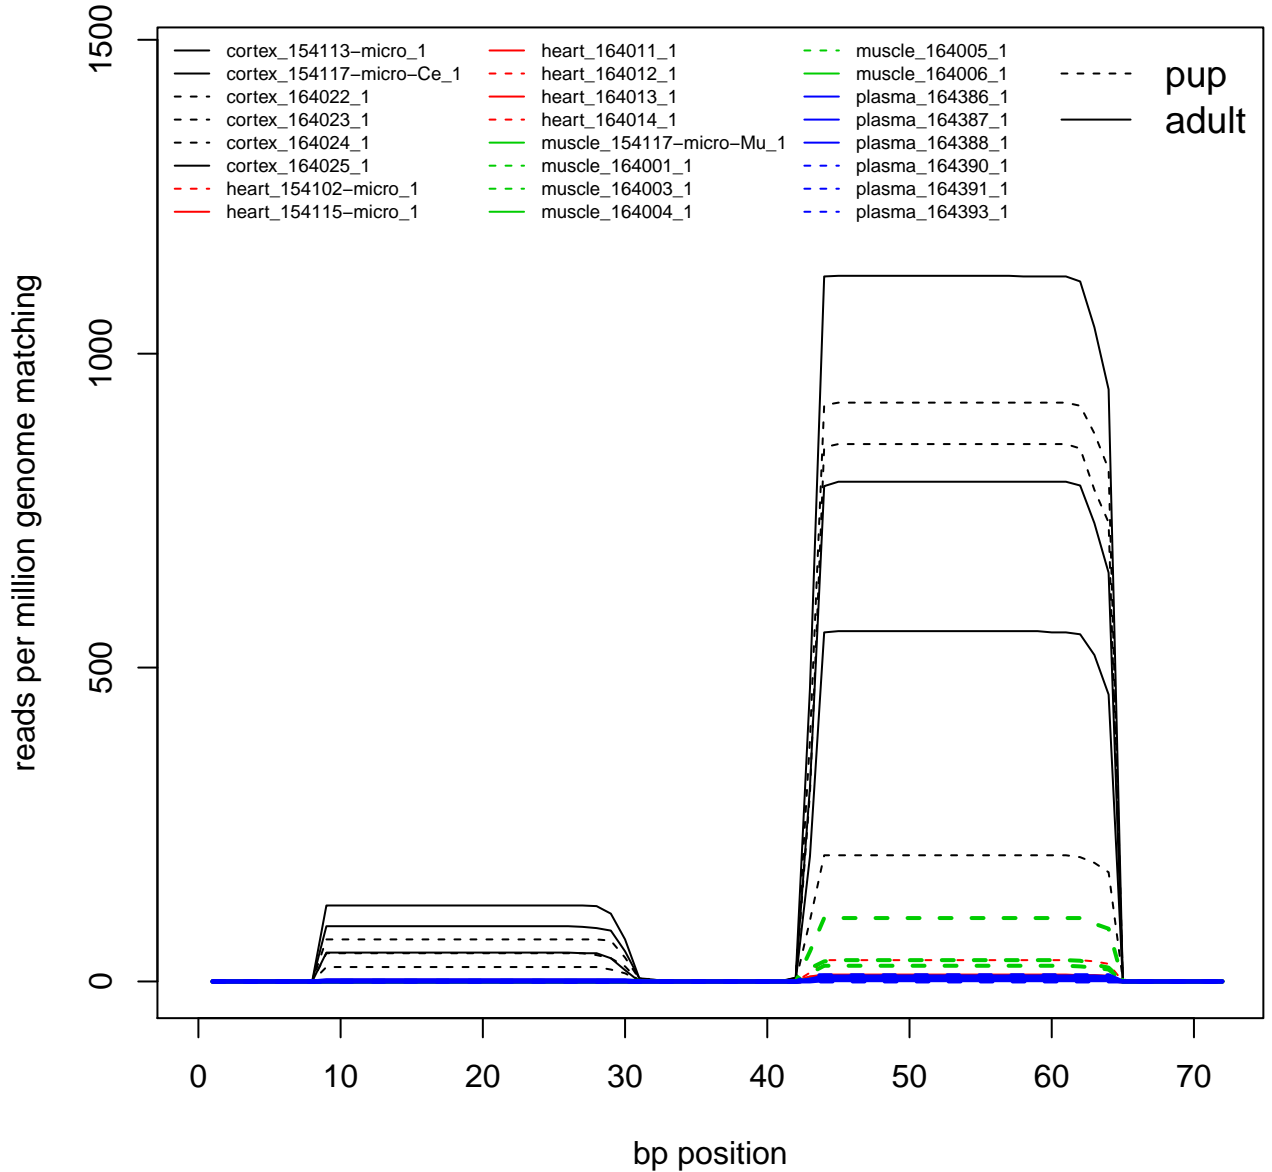



# lwe-miR-299a\_loc1

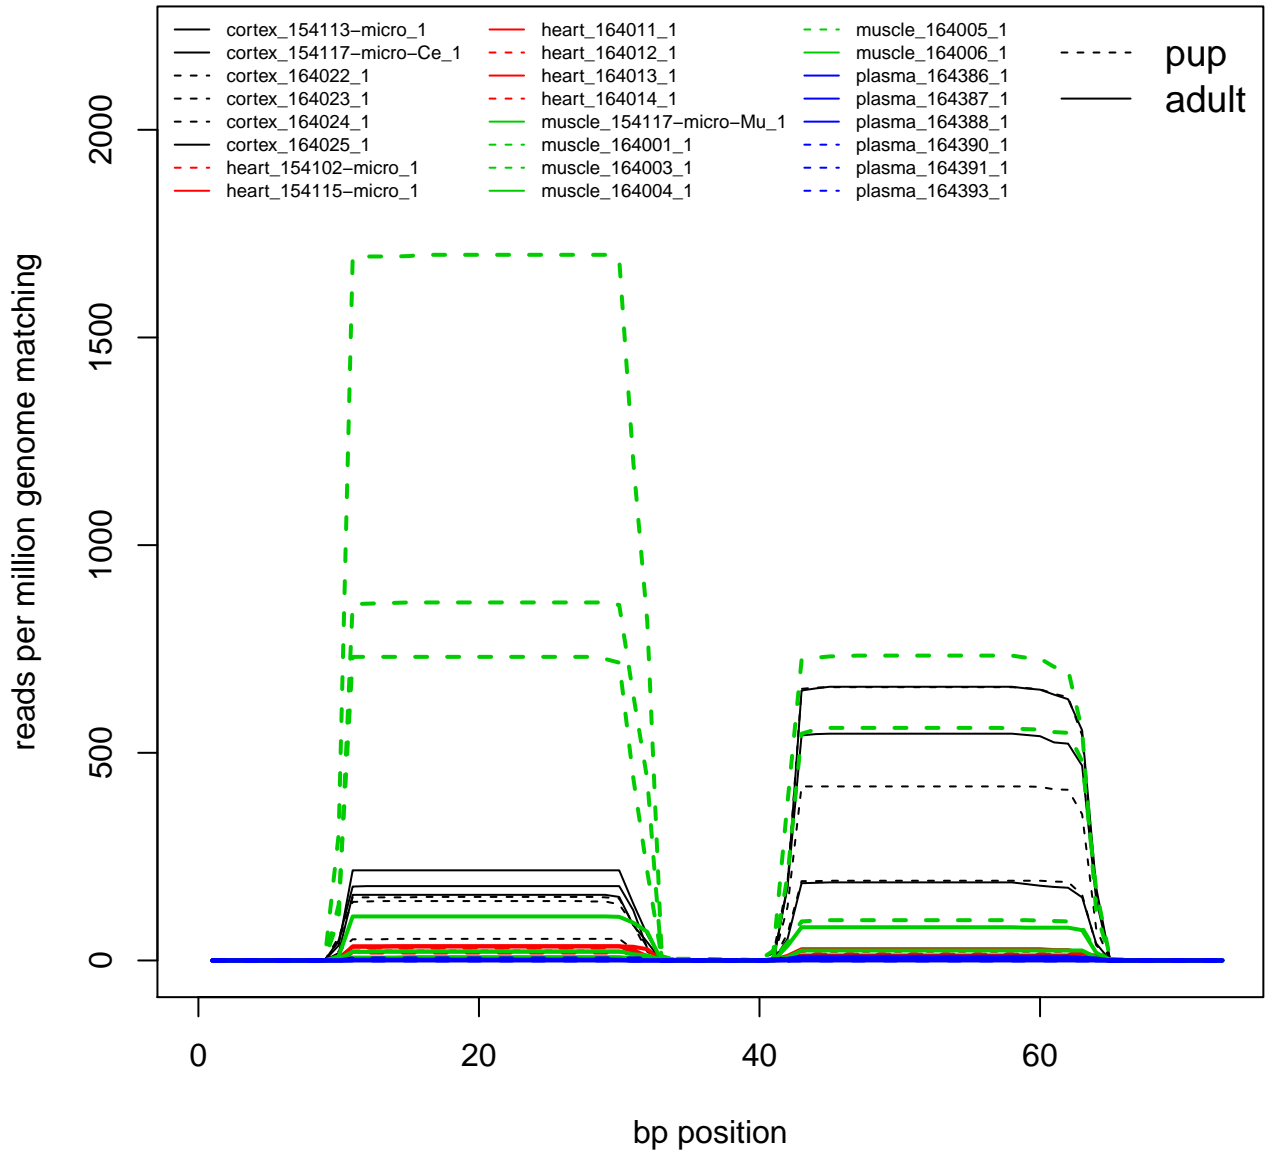

# lwe-miR-411\_loc1

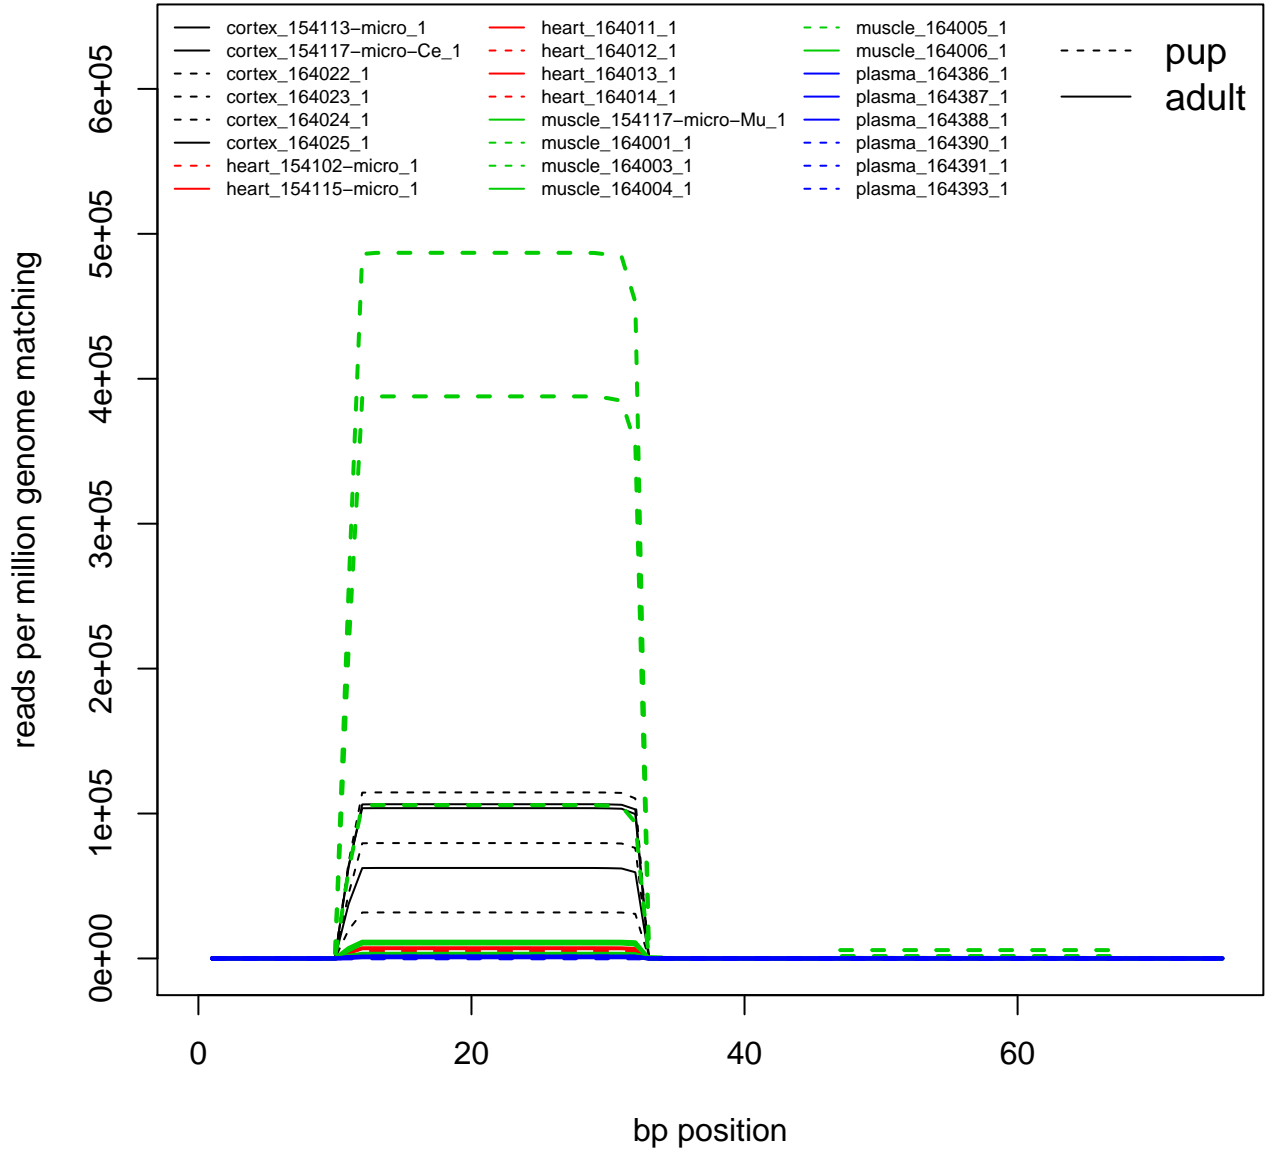

# lwe-miR-379\_loc1

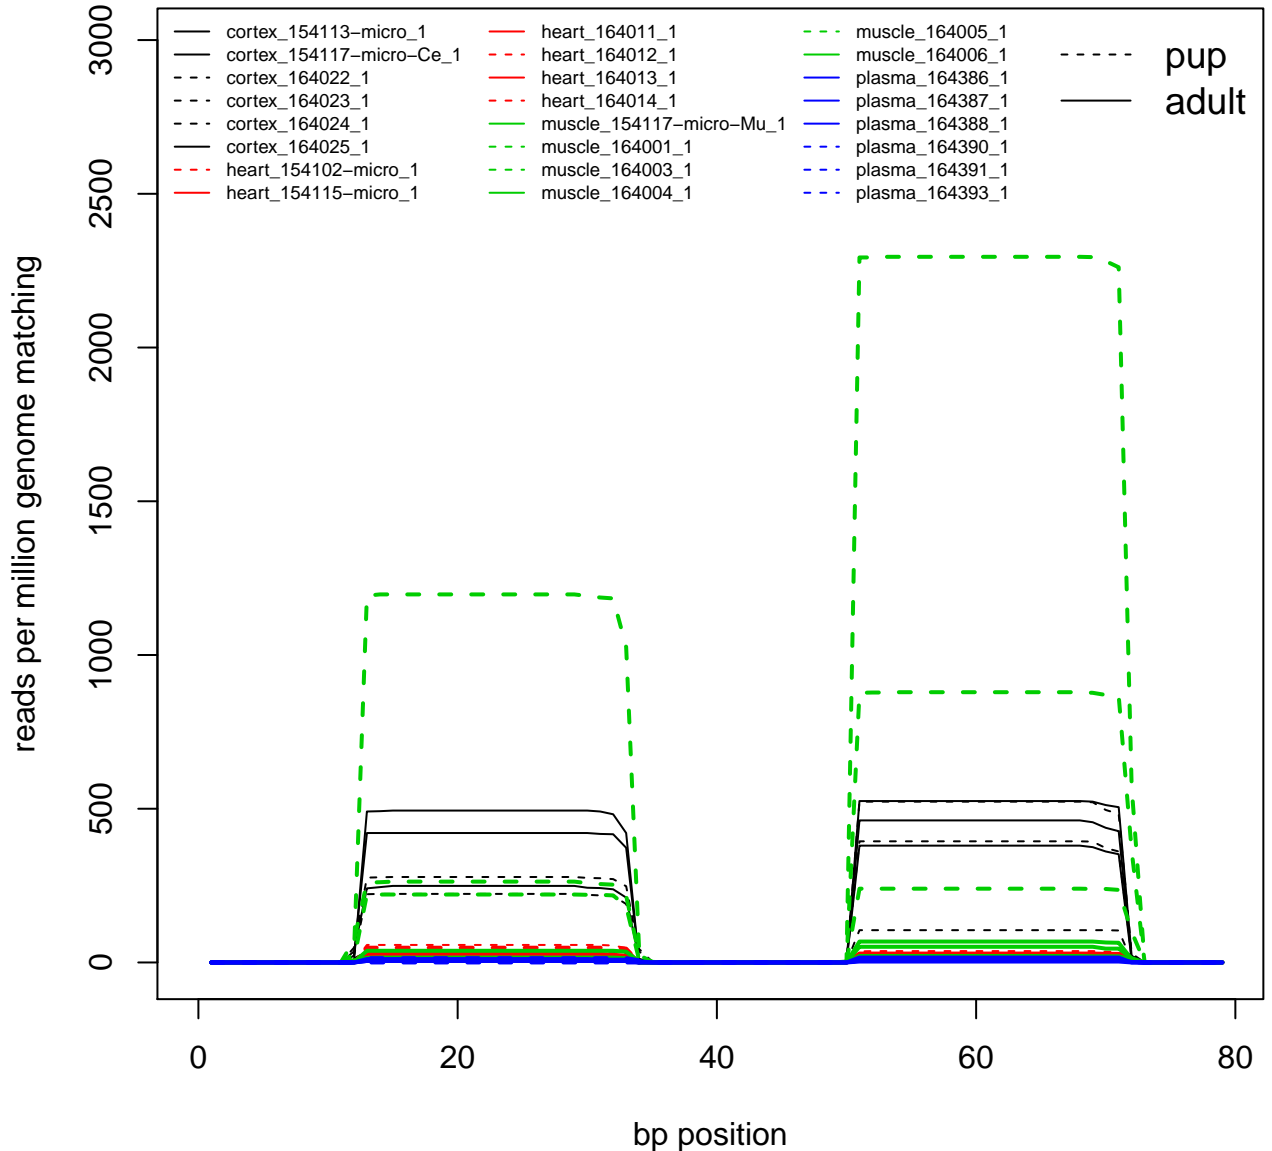





# lwe-miR-656\_loc1

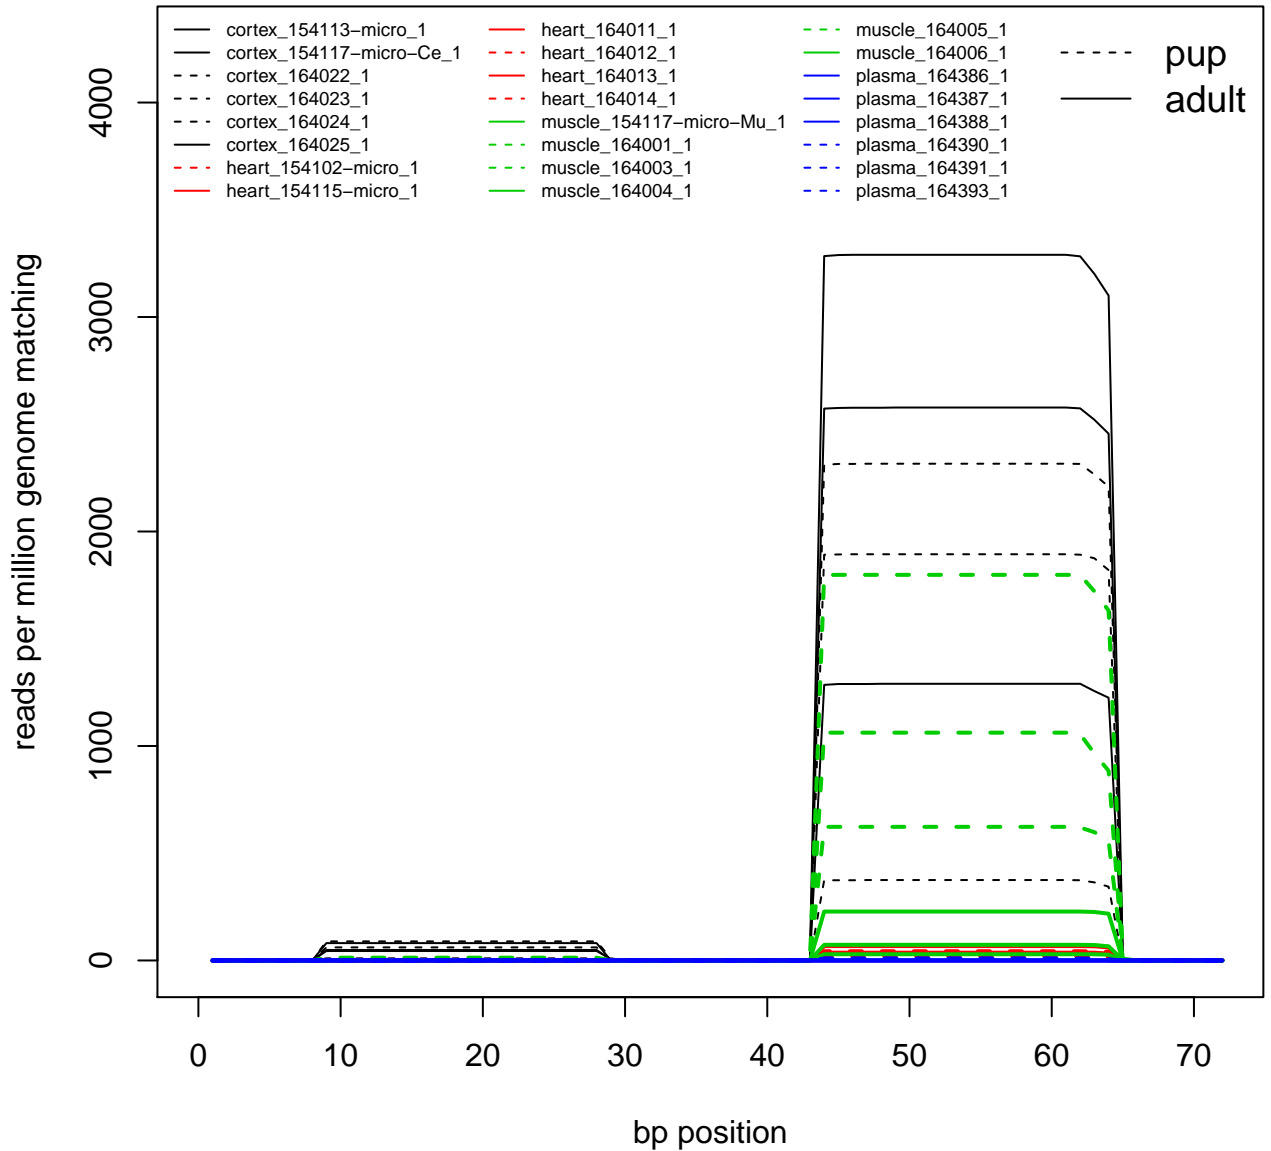

# lwe-miR-410\_loc1

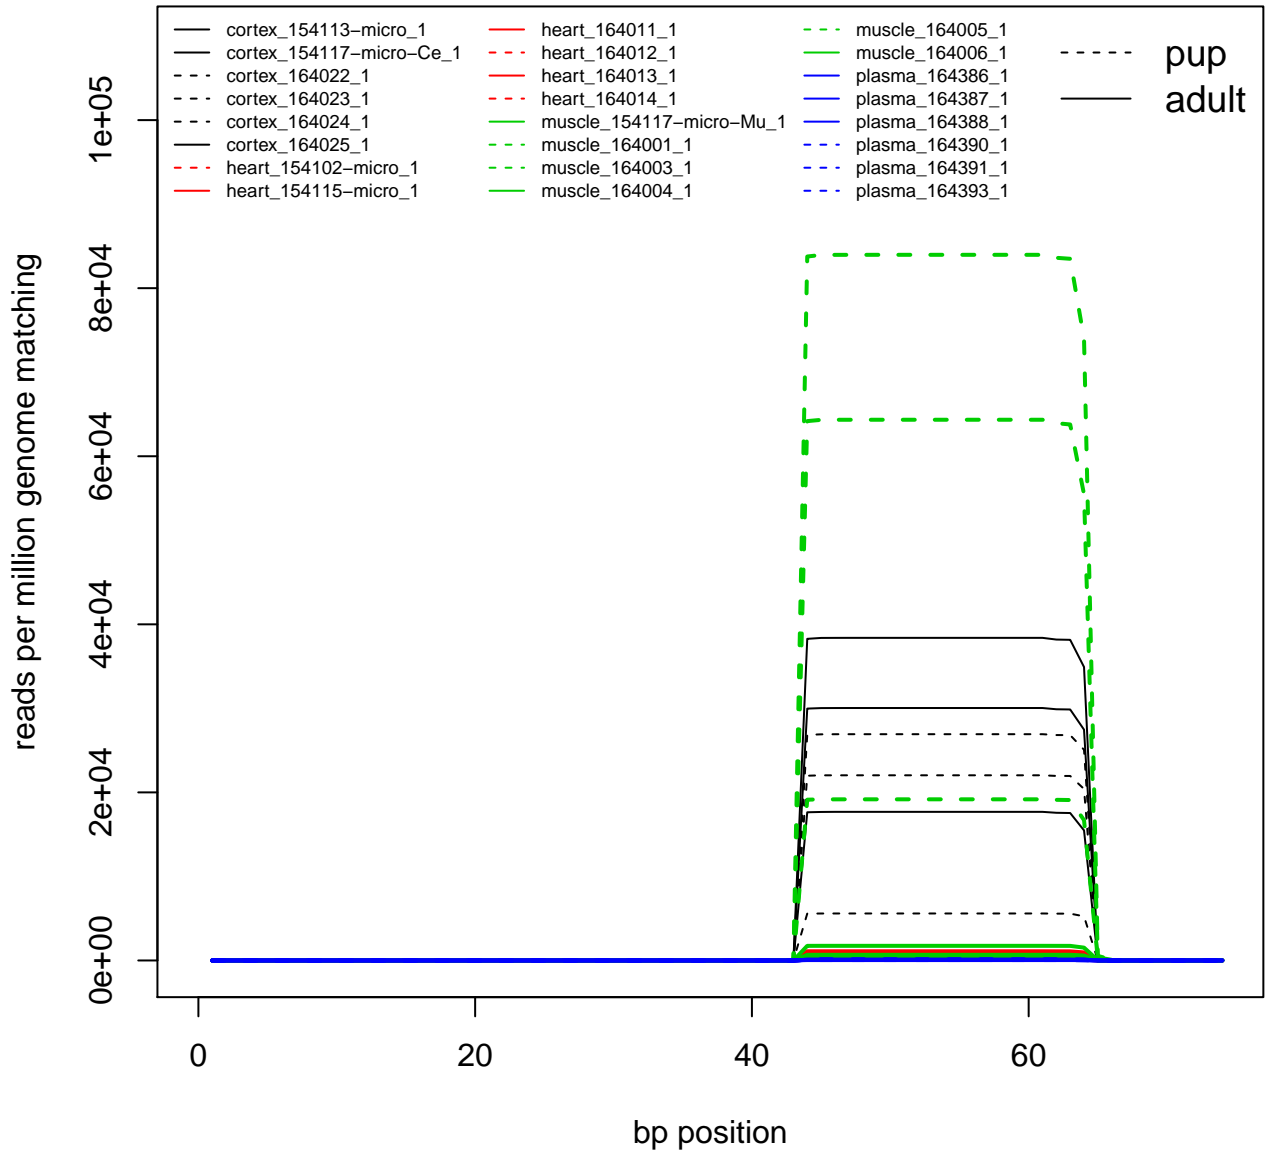

# lwe-miR-369\_loc1

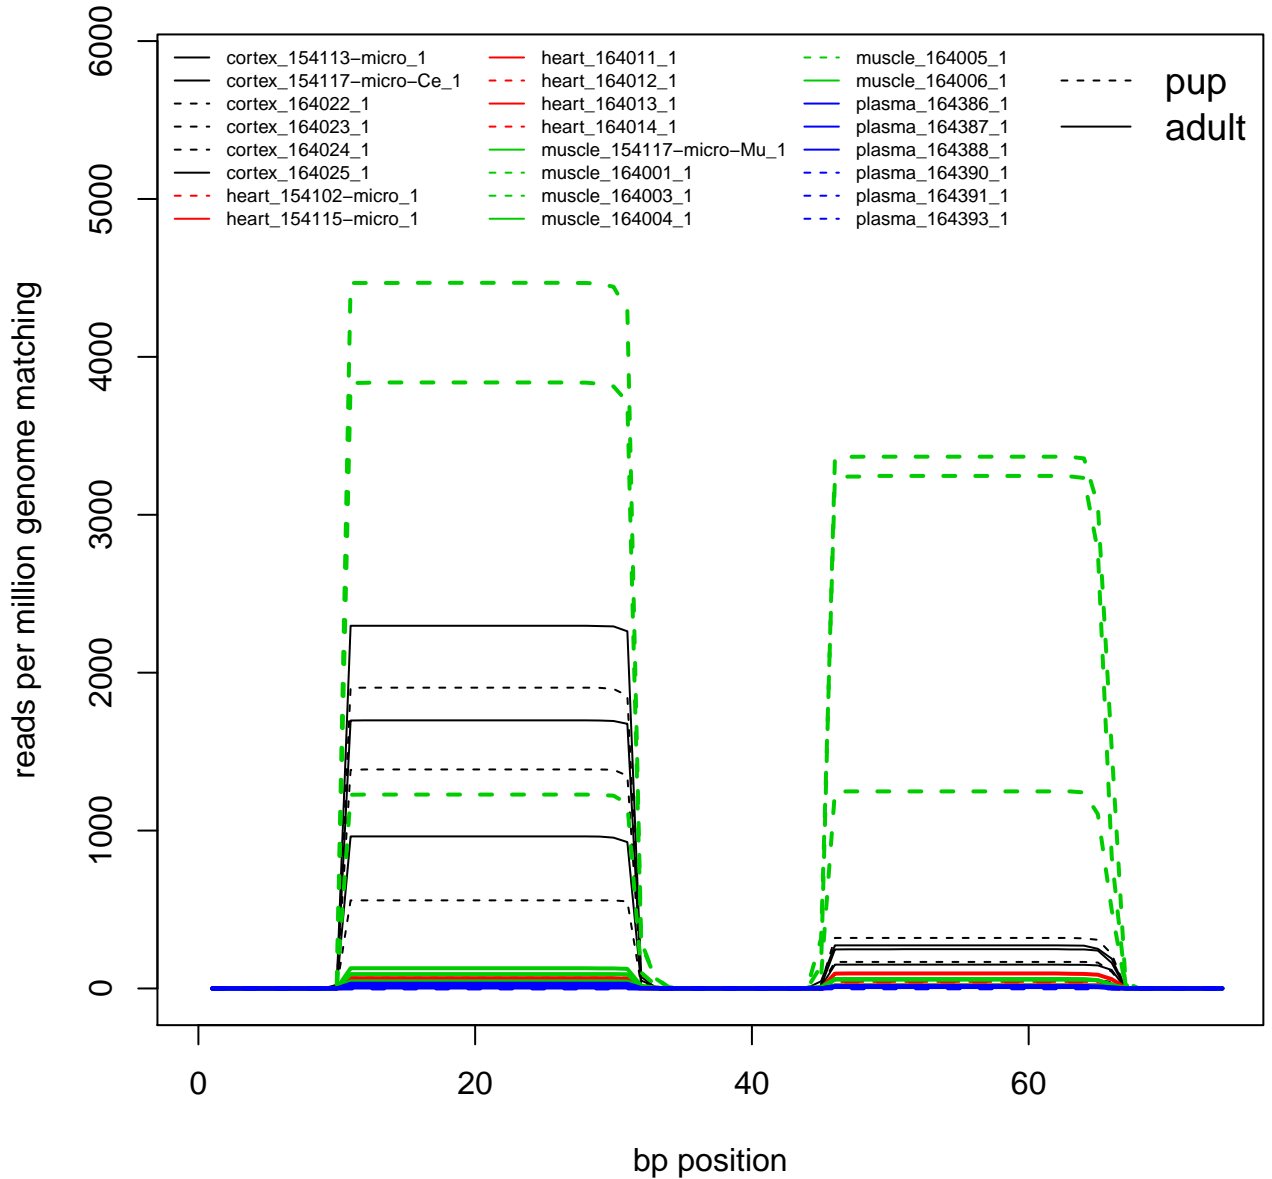

# lwe-miR-412\_loc1

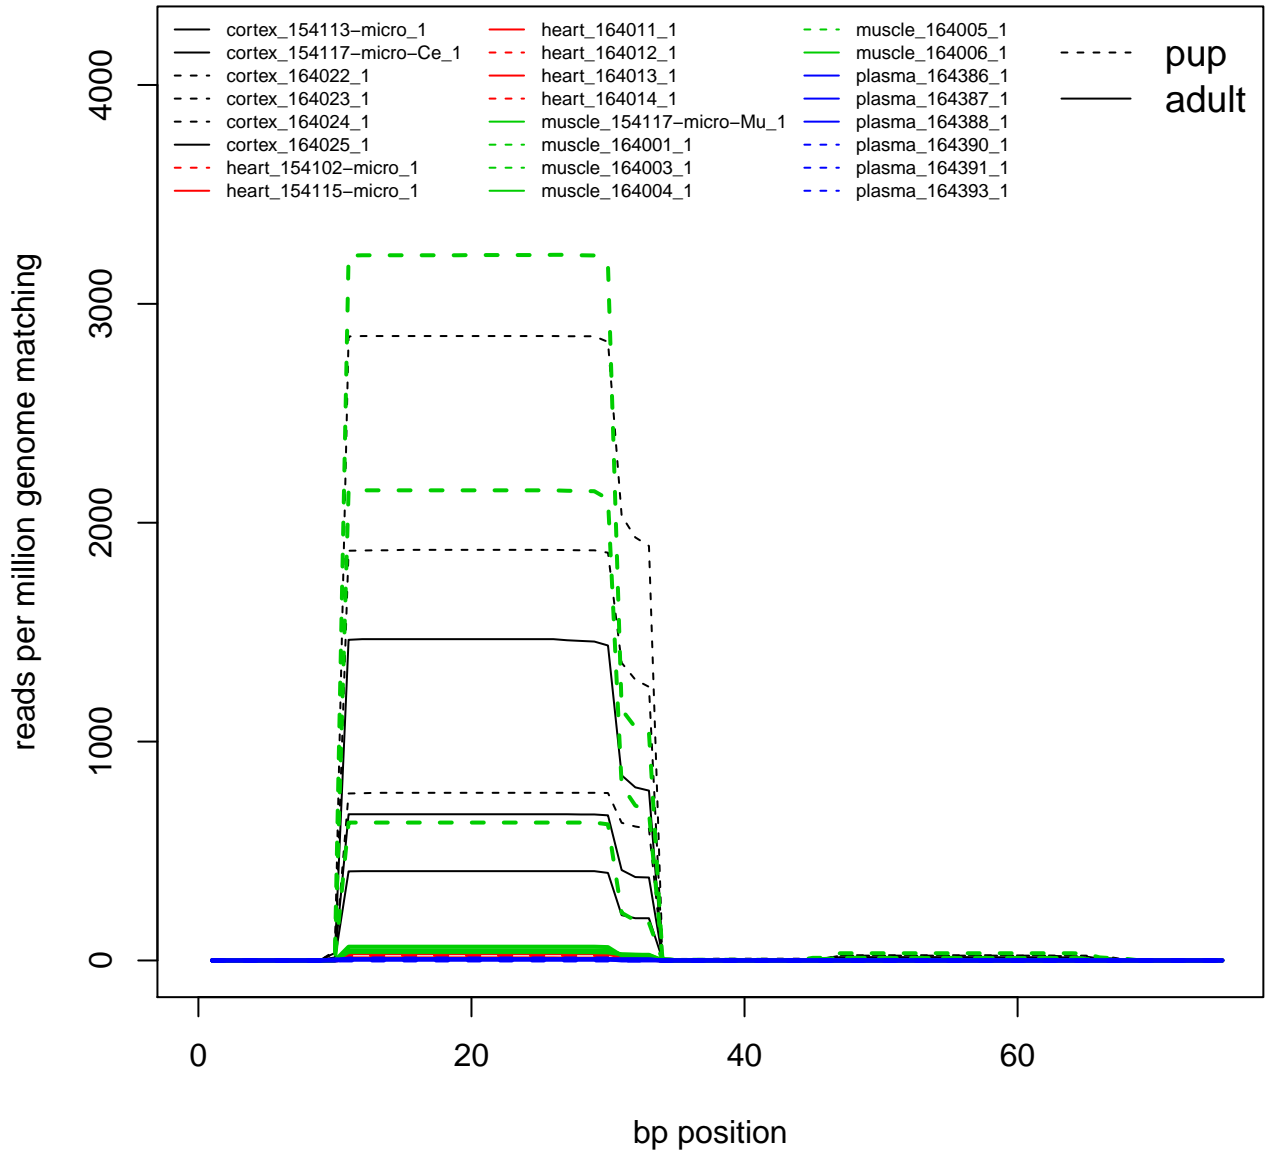

# lwe-miR-409a\_loc1

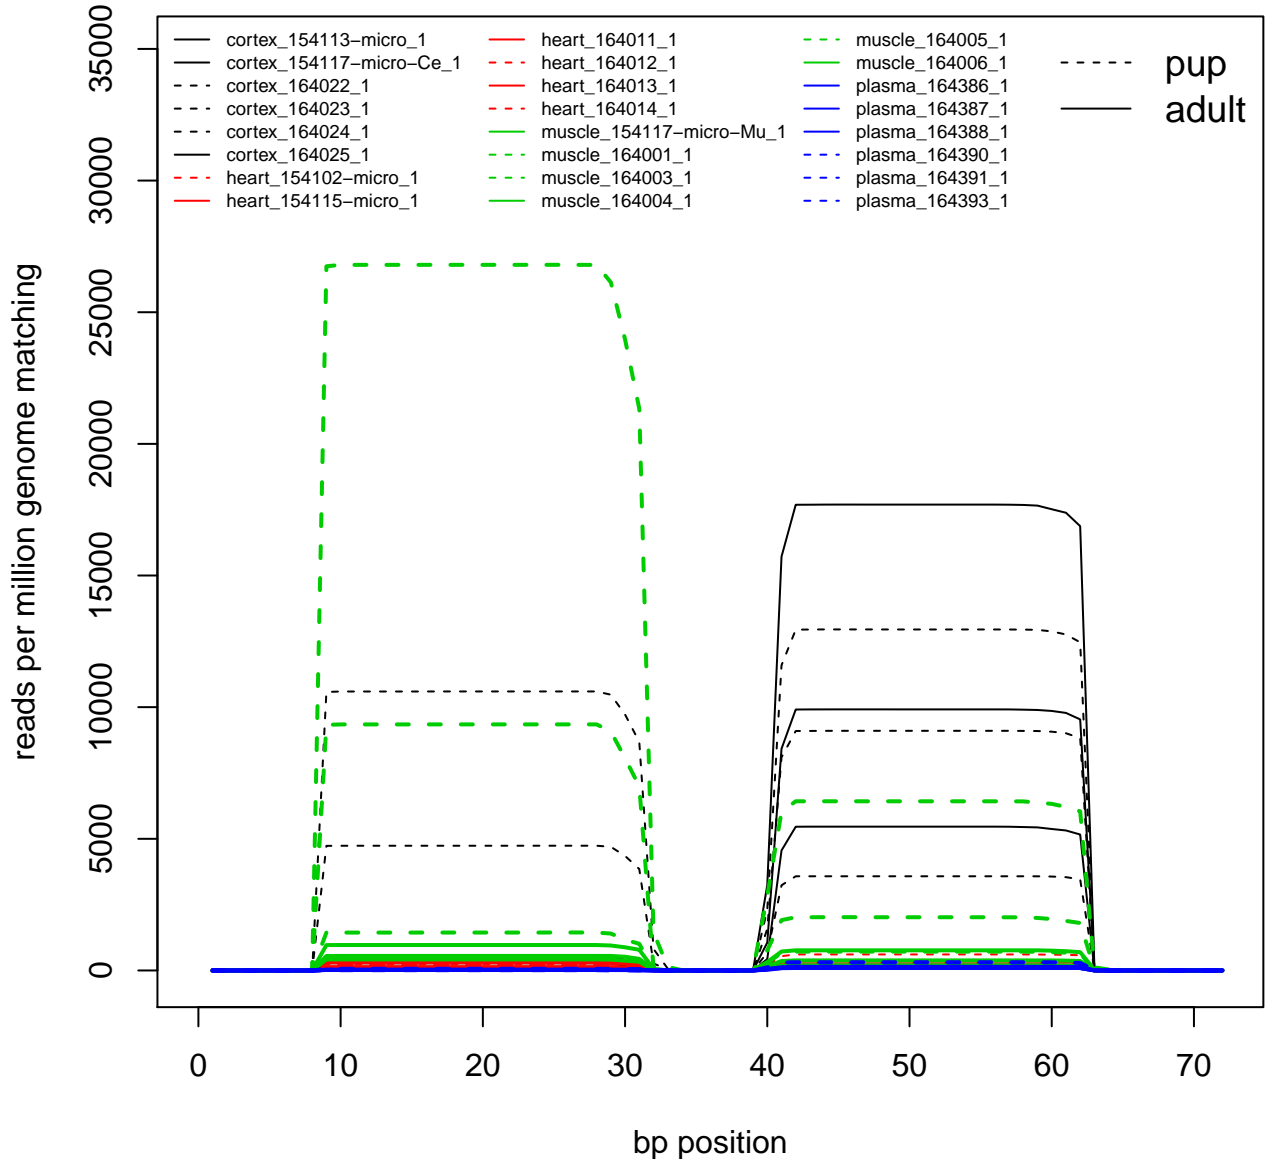

# lwe-miR-377\_loc1

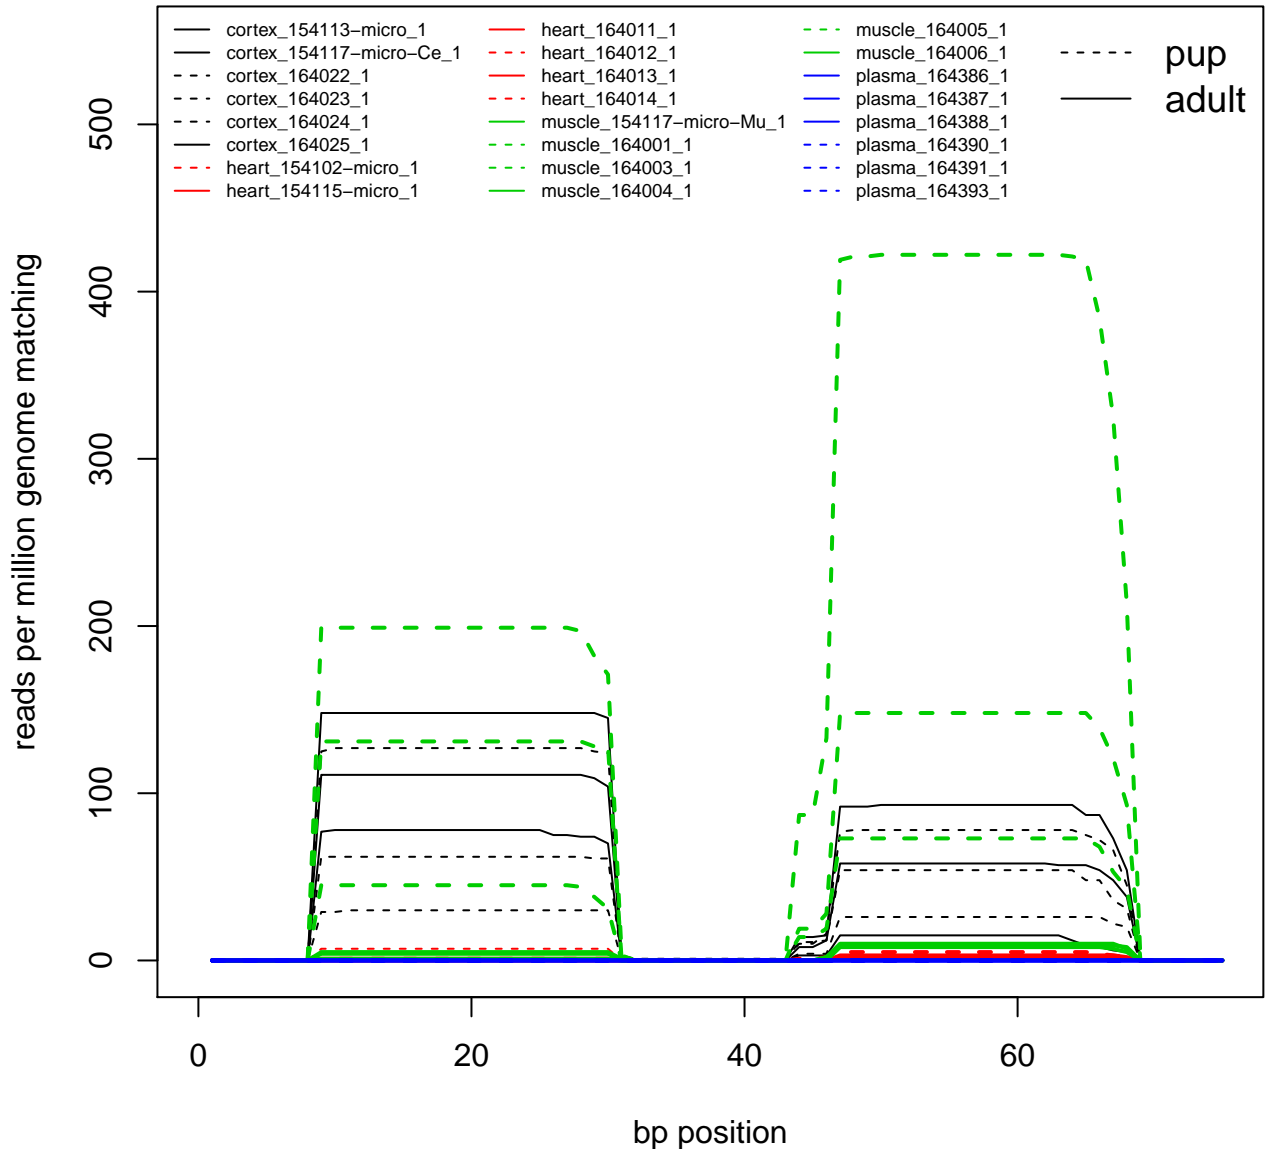

# lwe-miR-496\_loc1

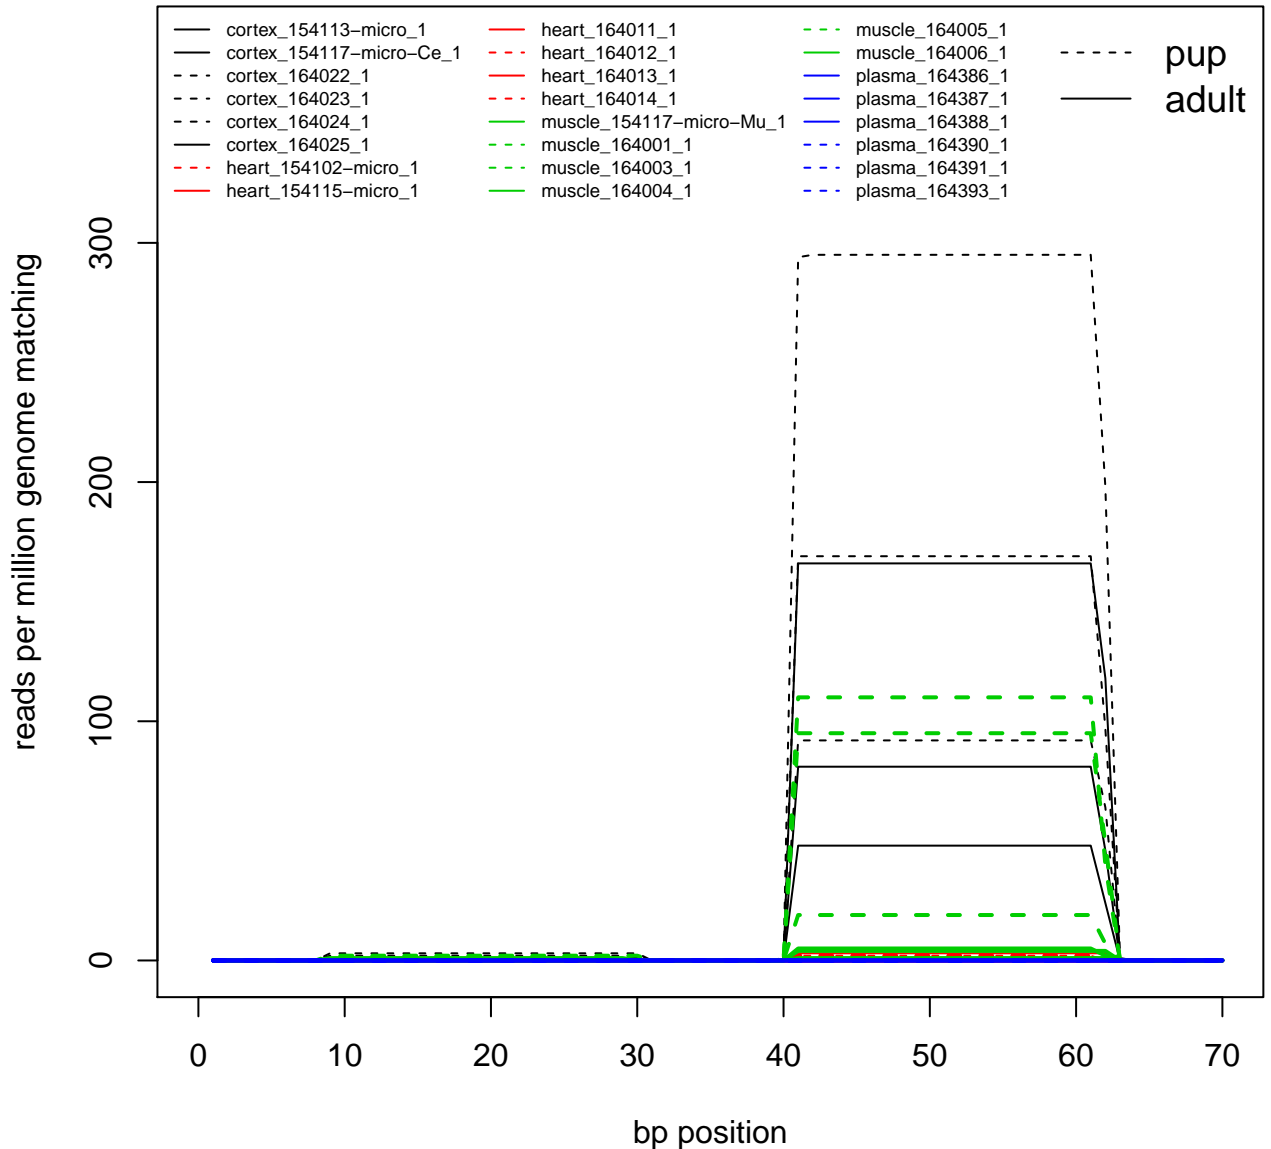



# lwe-miR-485\_loc1

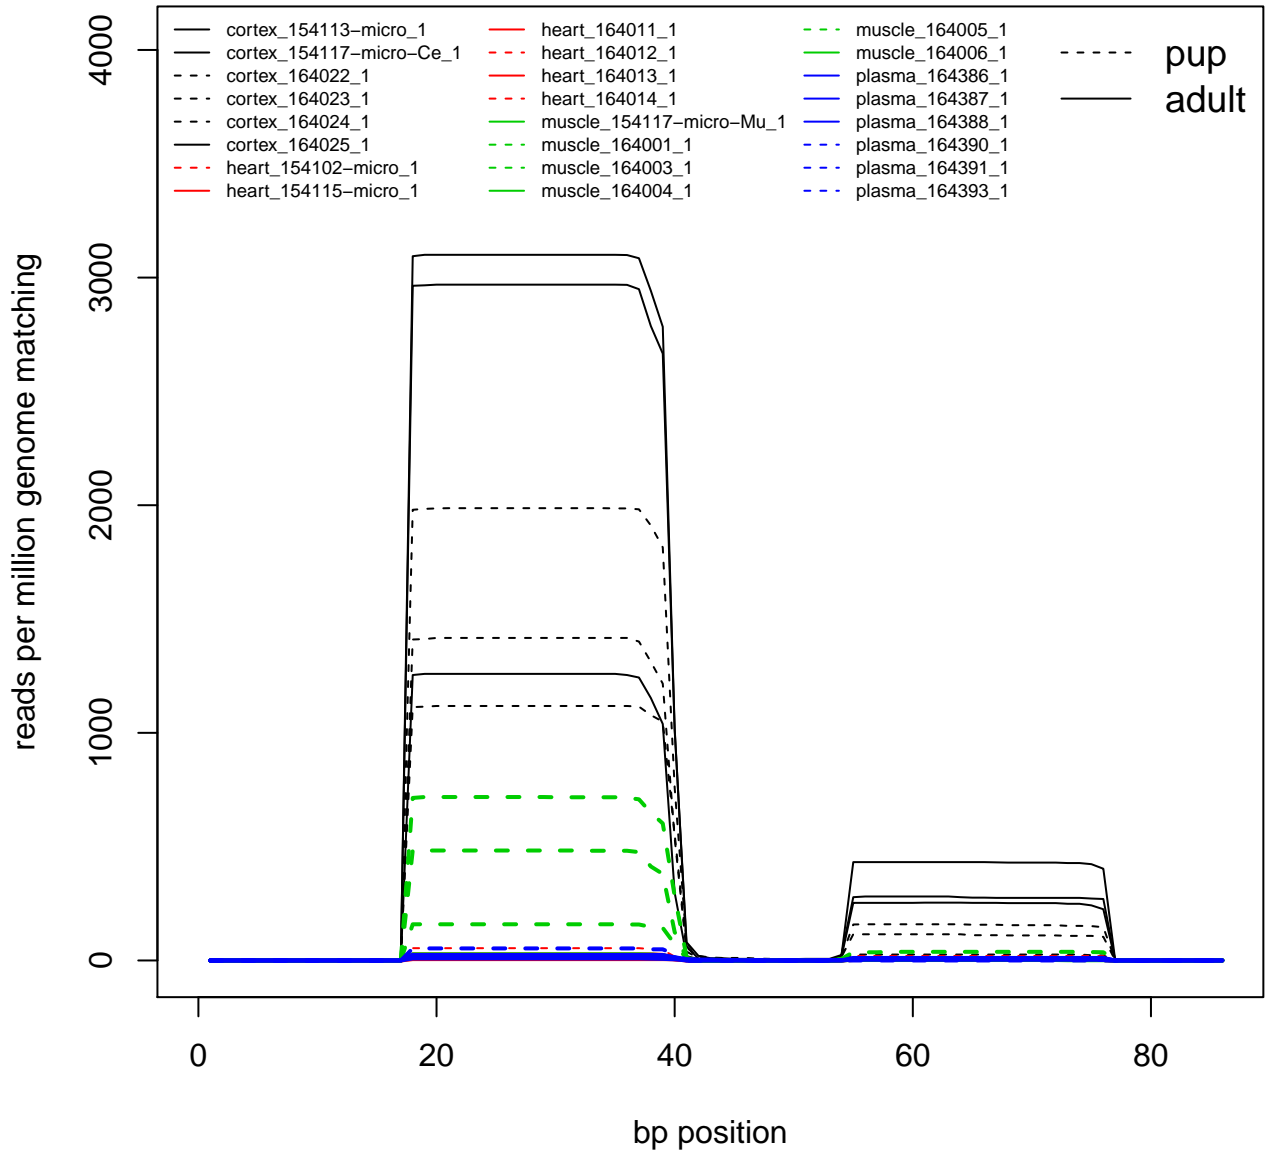

# lwe-miR-382\_loc1

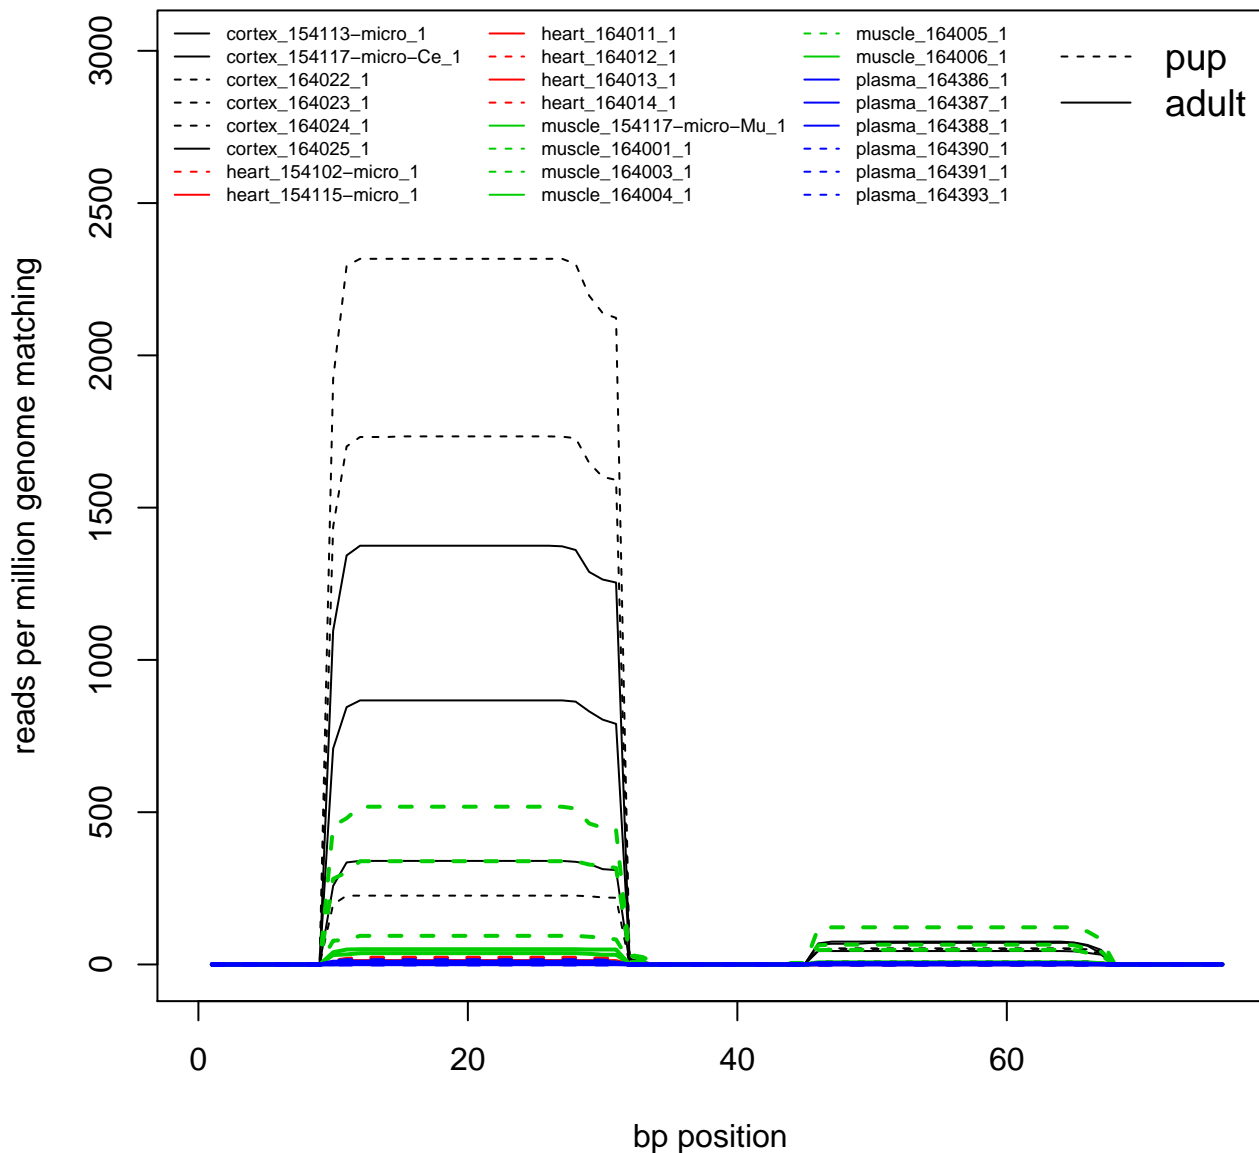

# lwe-miR-487a\_loc1

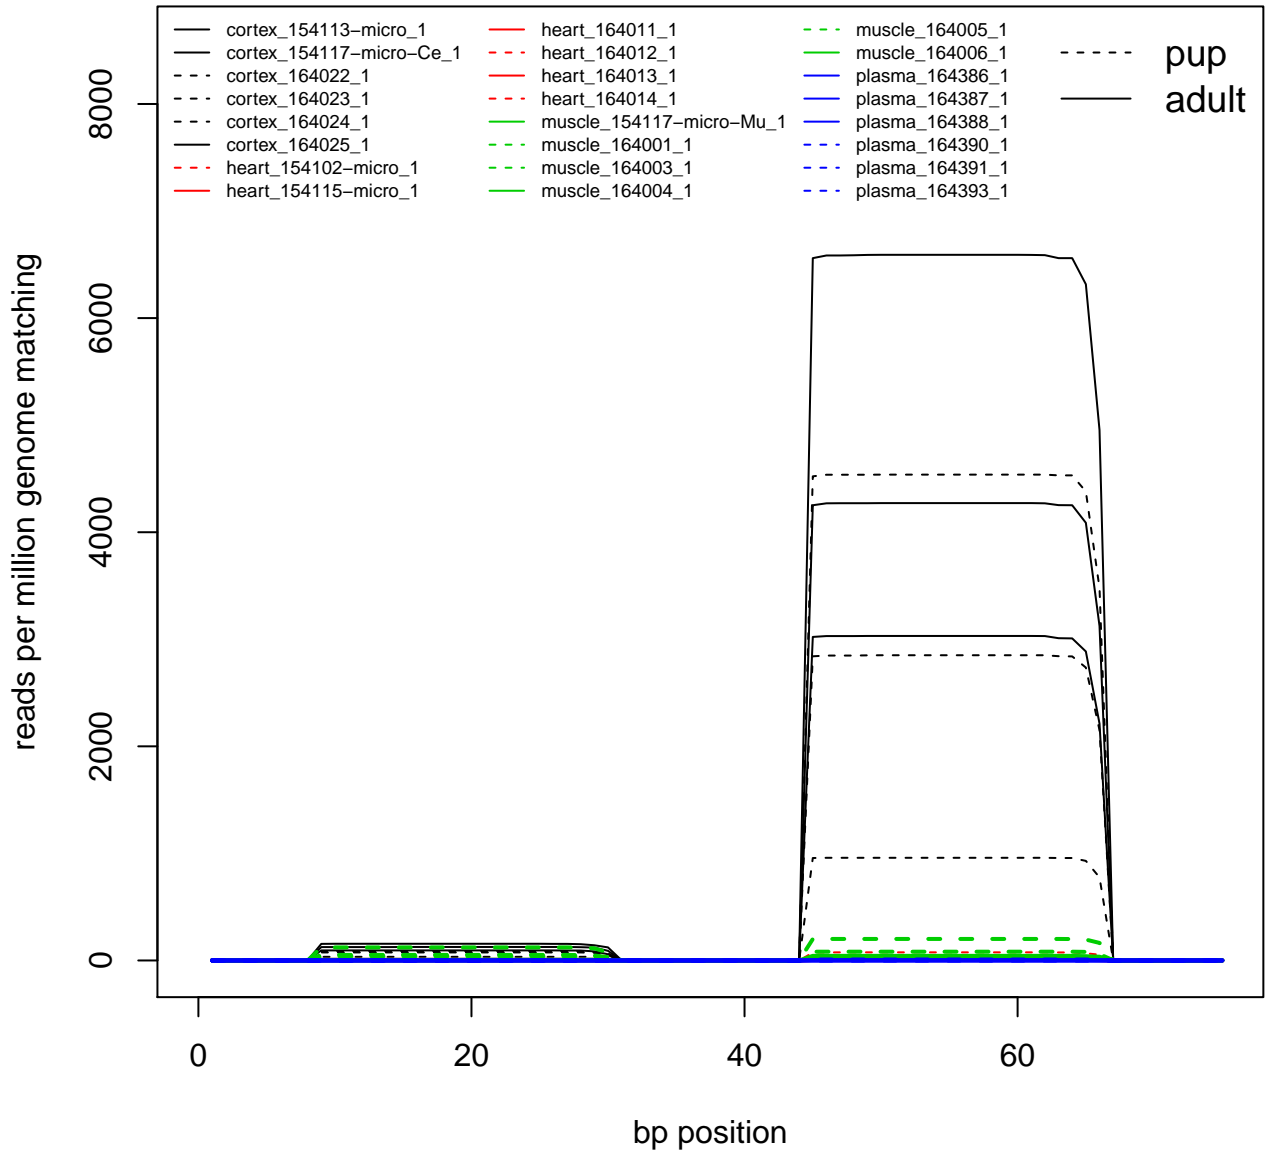

# lwe-miR-411c\_loc1

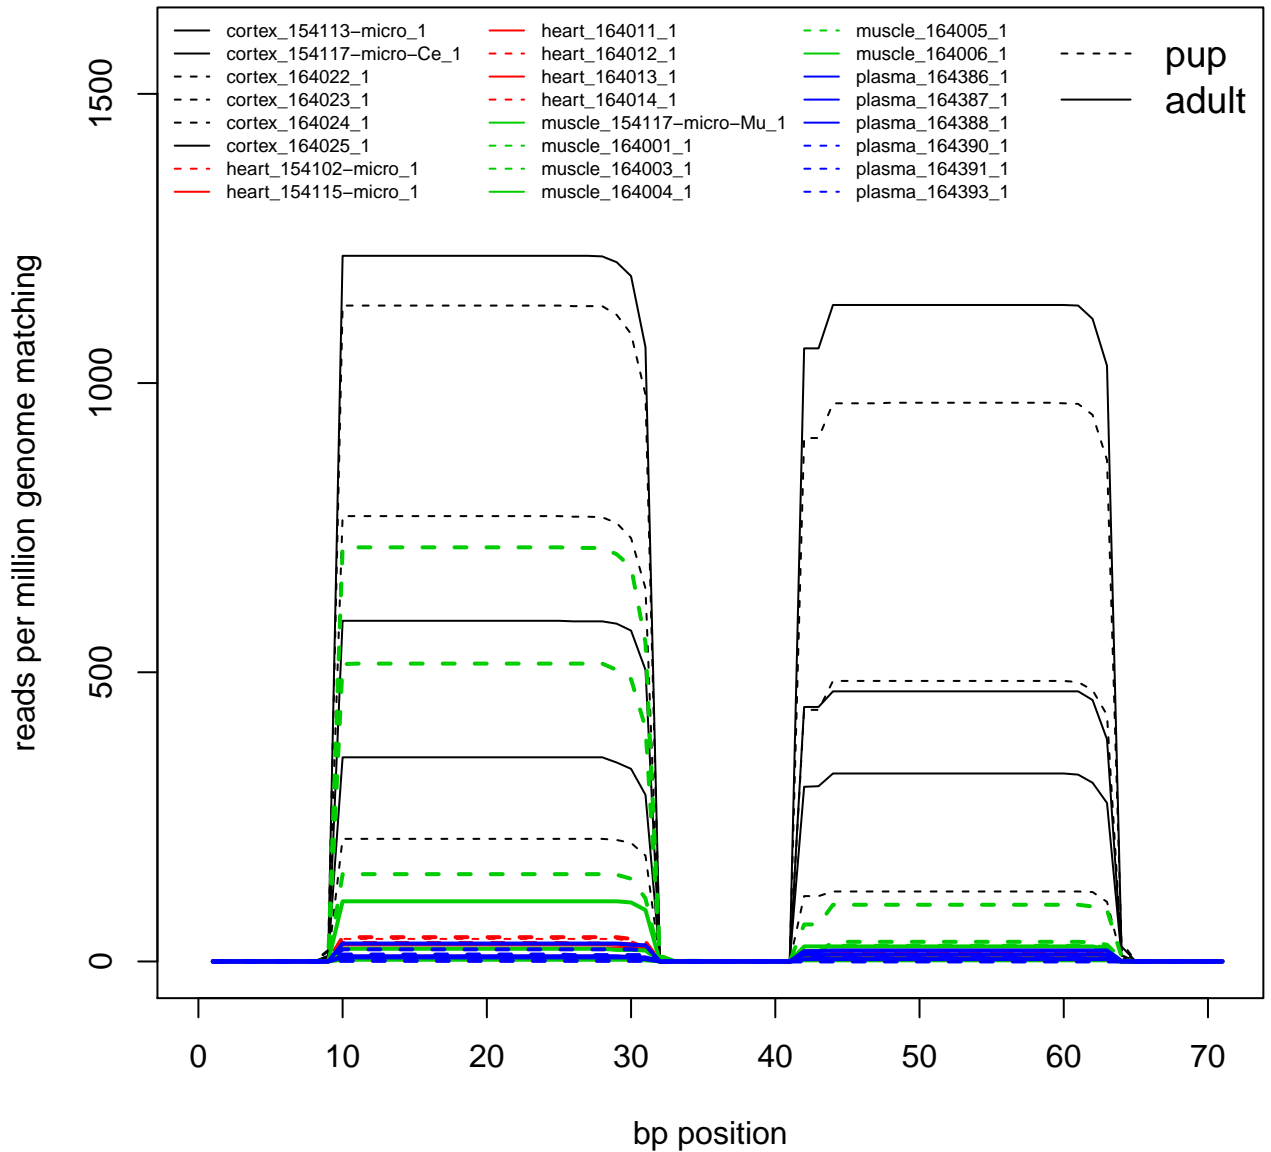





# lwe-miR-889\_loc1

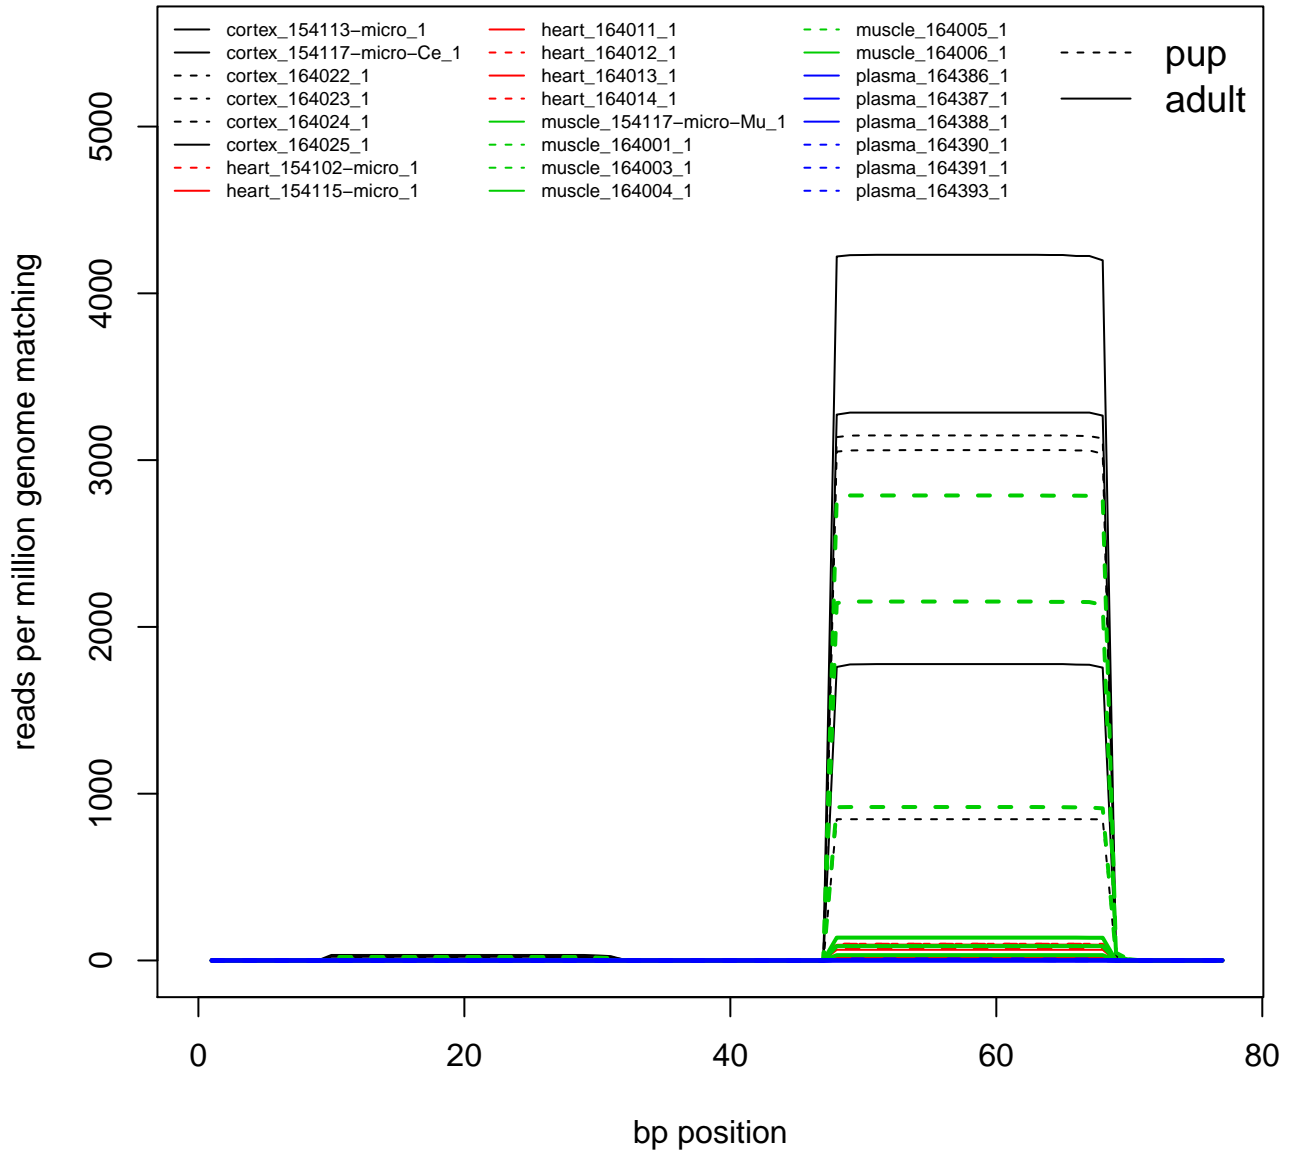

# lwe-miR-539\_loc1

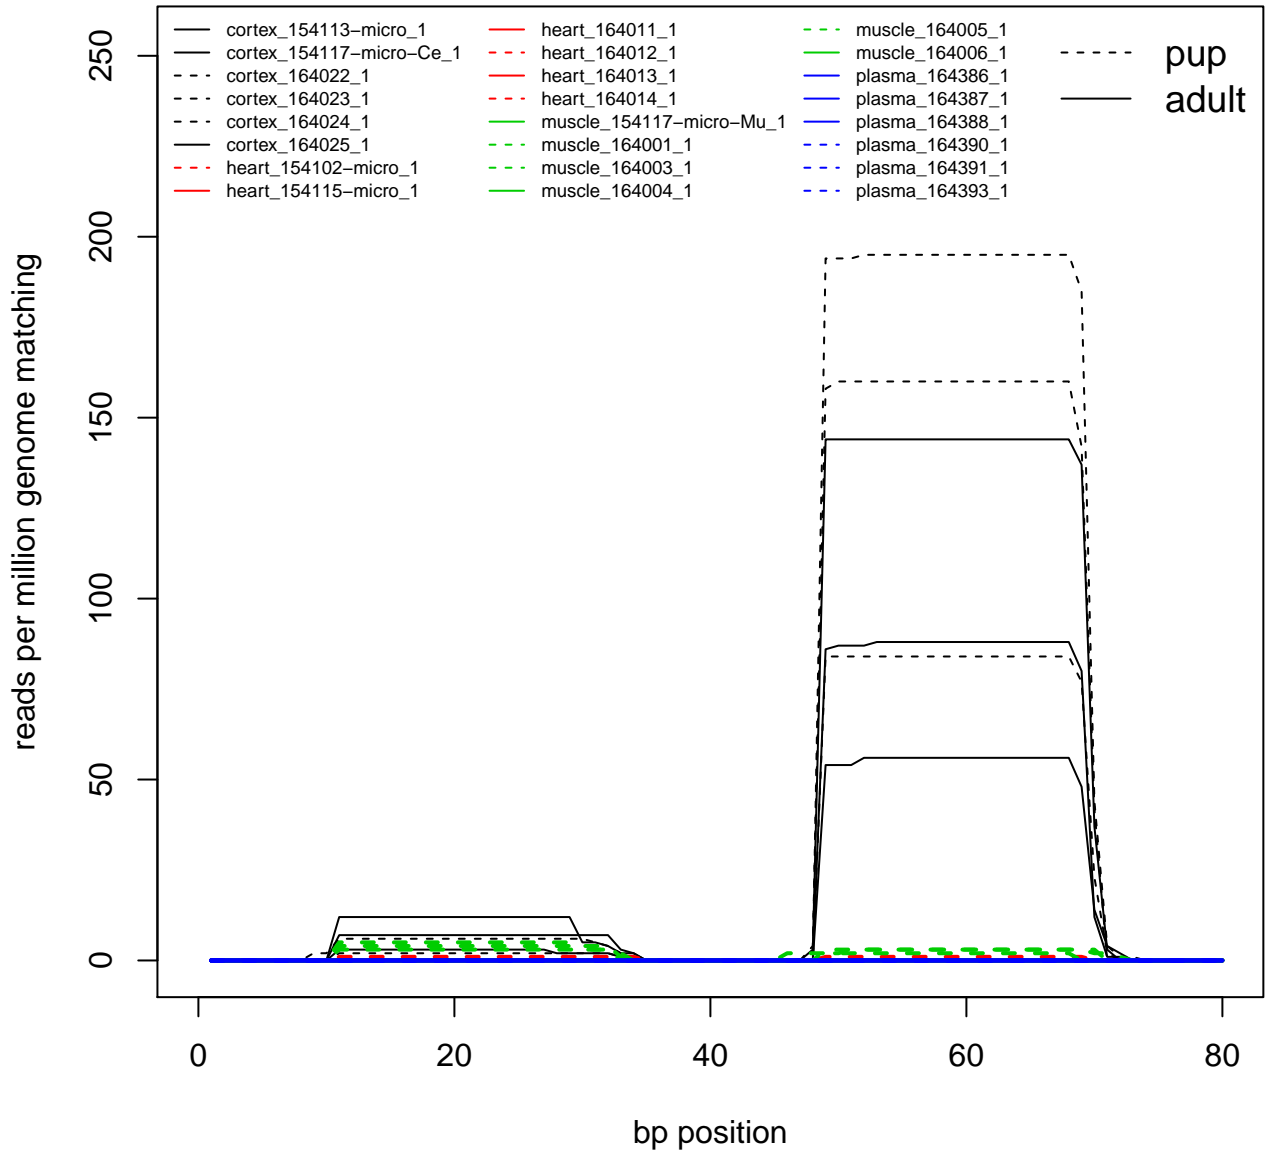



# lwe-miR-487b\_loc1

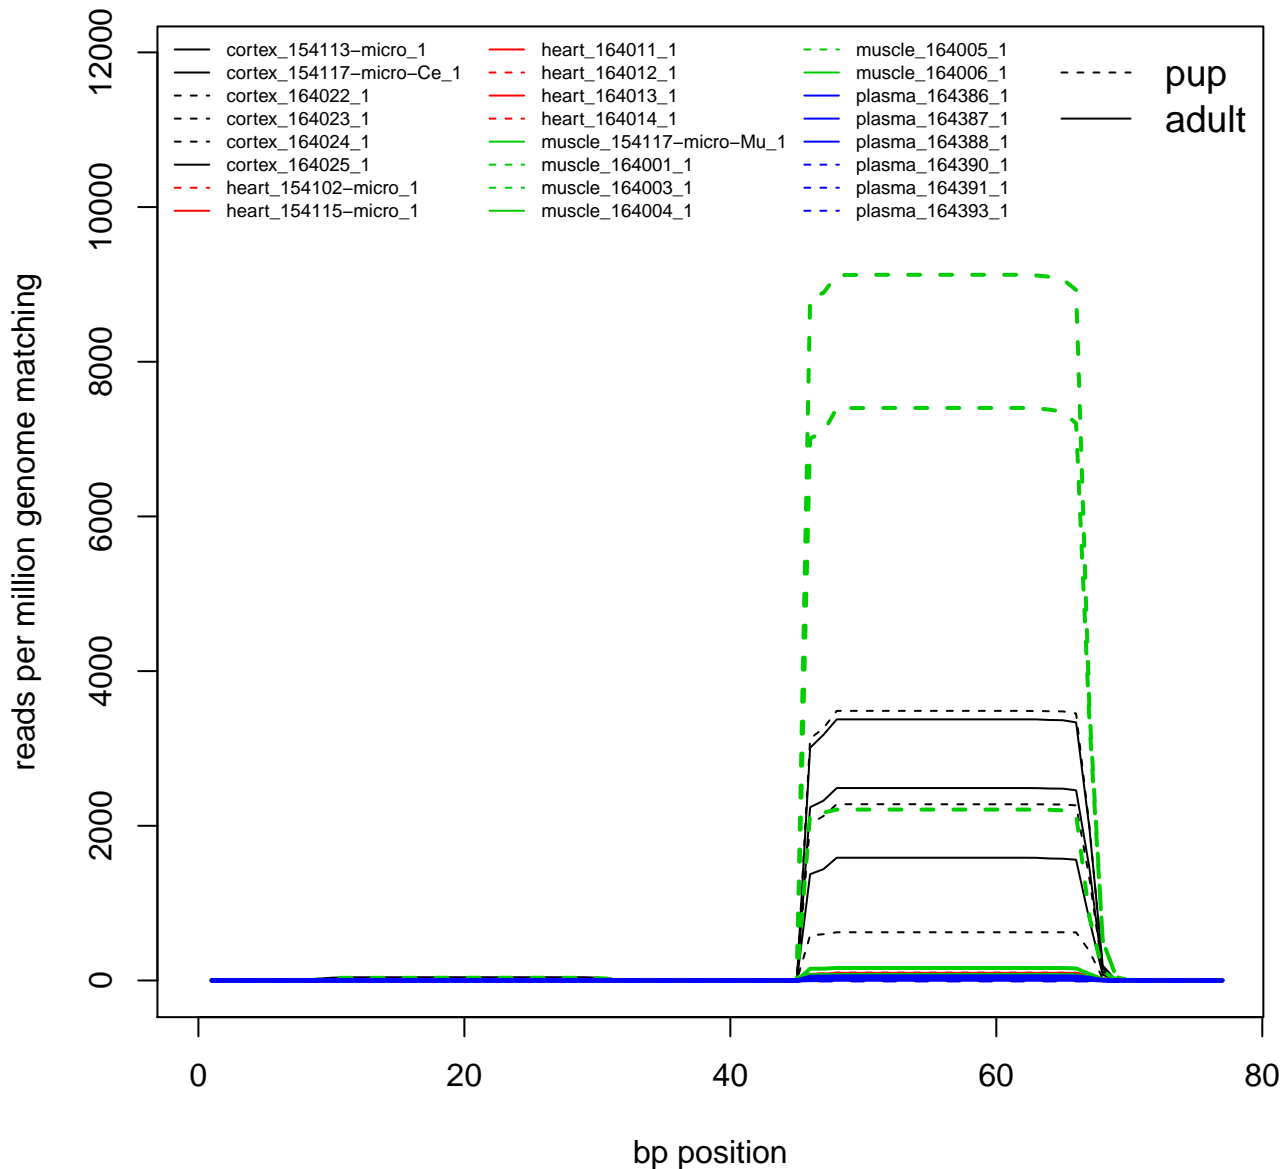

# lwe-miR-381\_loc1

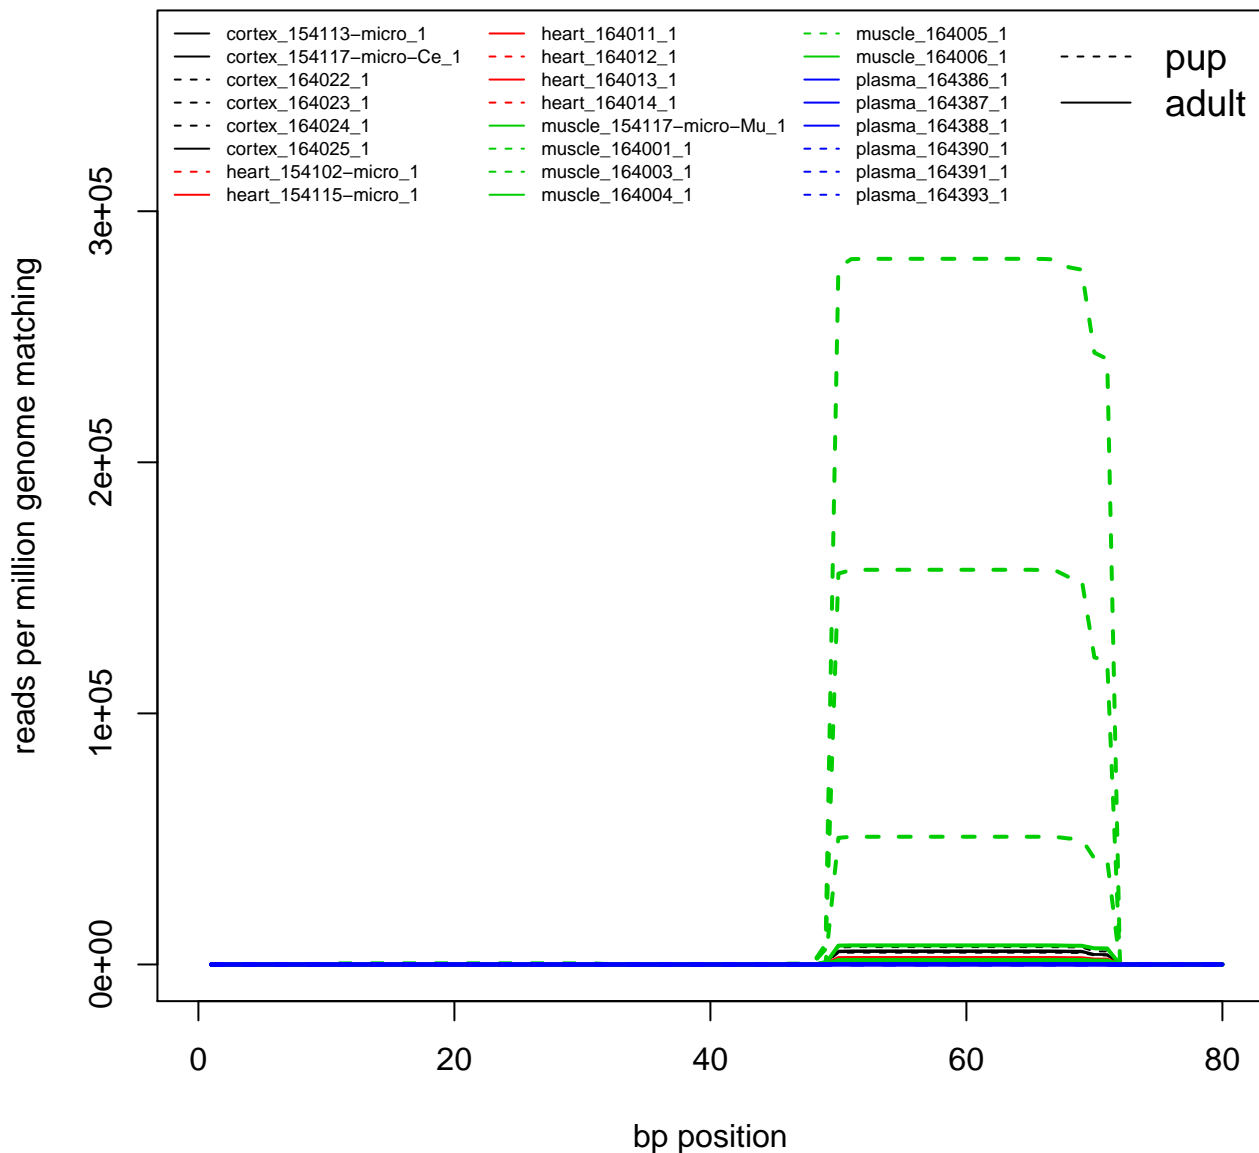

# lwe-miR-1185\_loc1

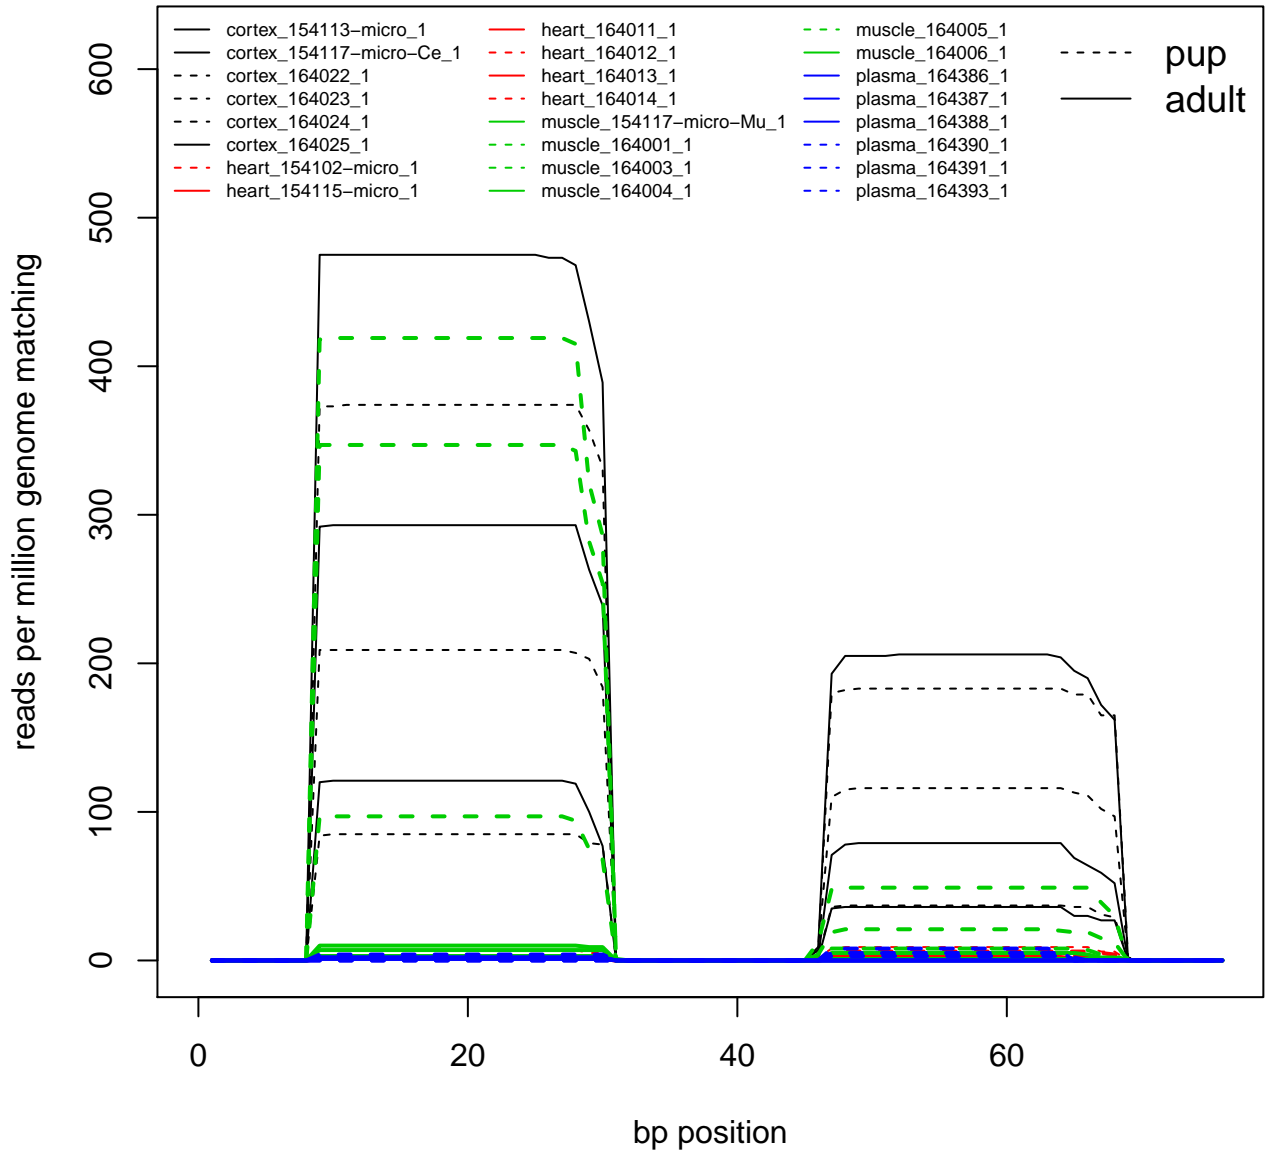

# lwe-miR-376a\_loc1

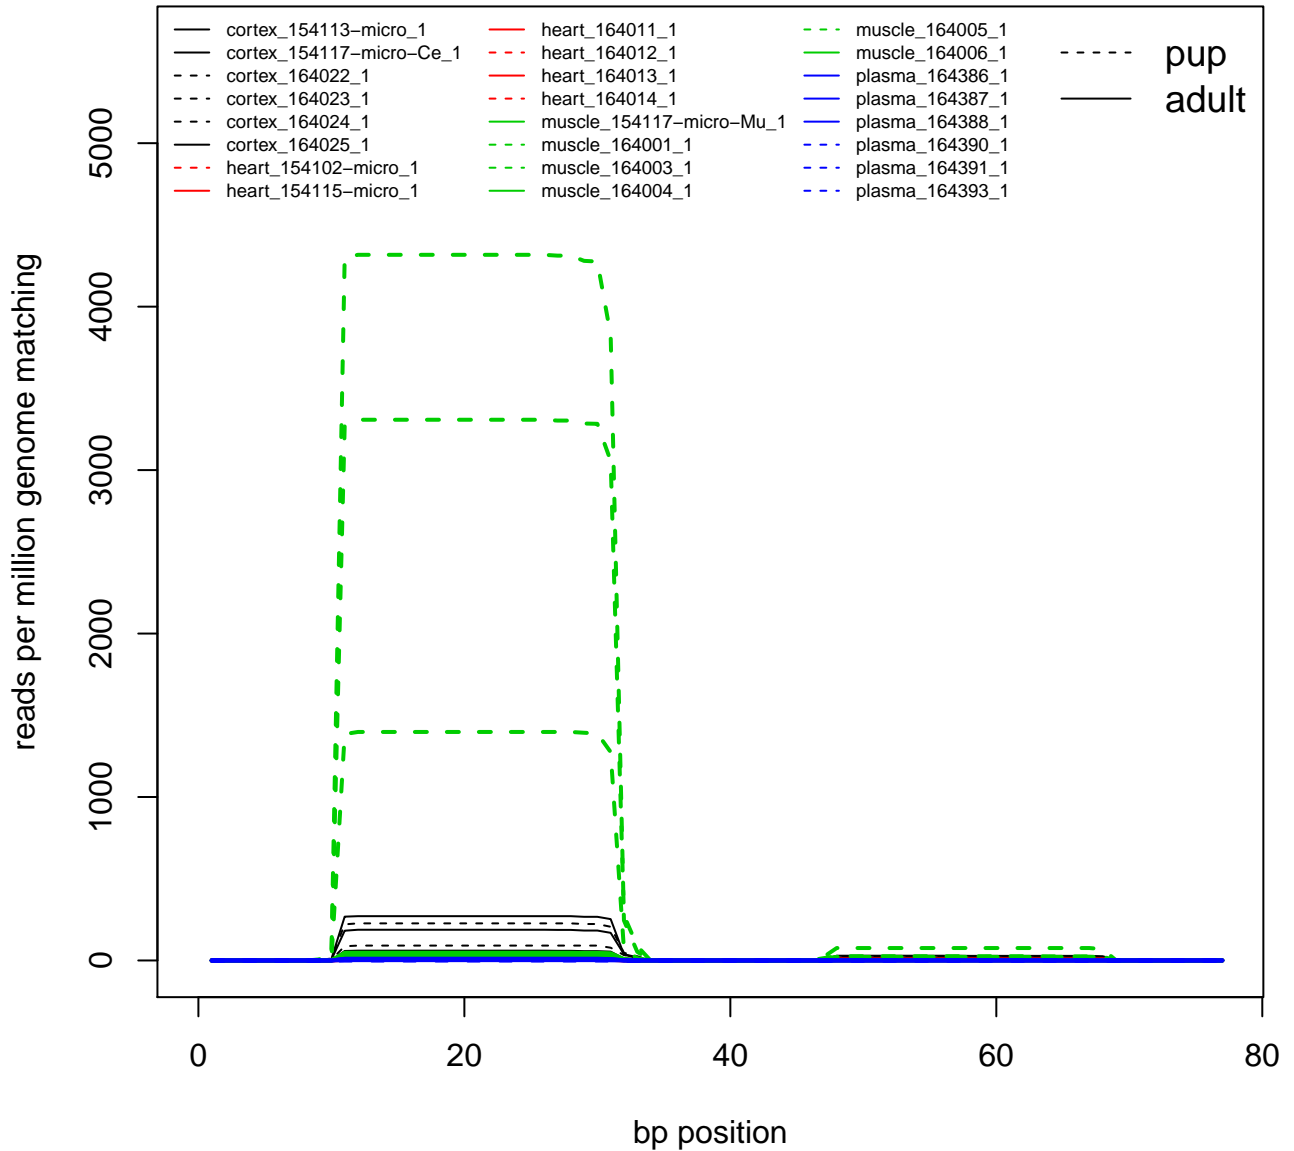

# lwe-miR-376b\_loc1

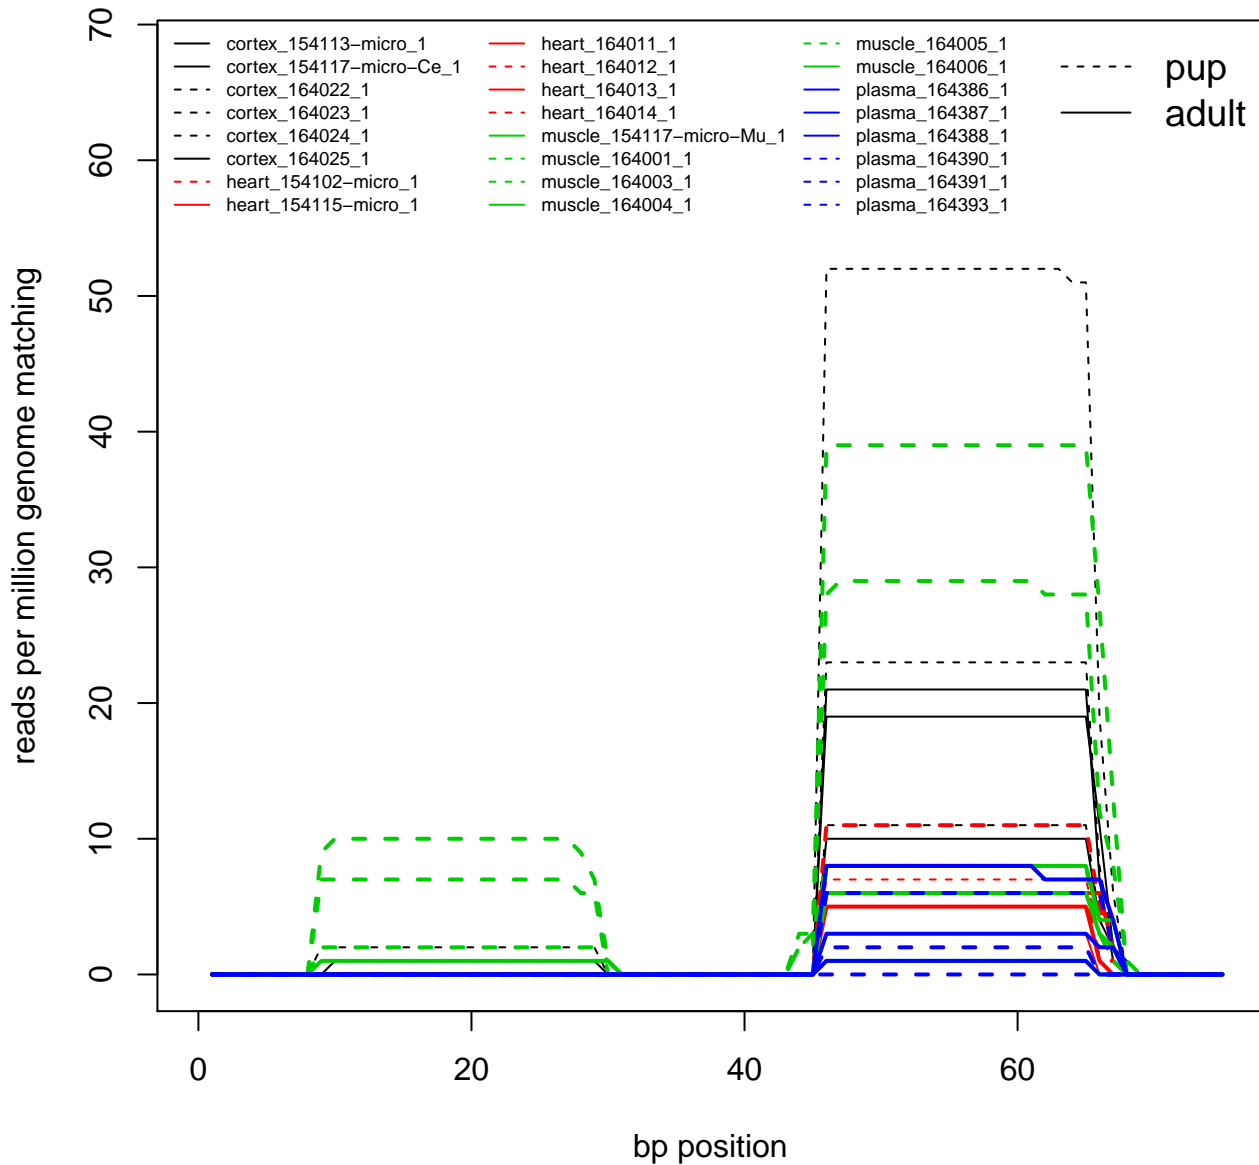

# lwe-miR-376a\_loc2

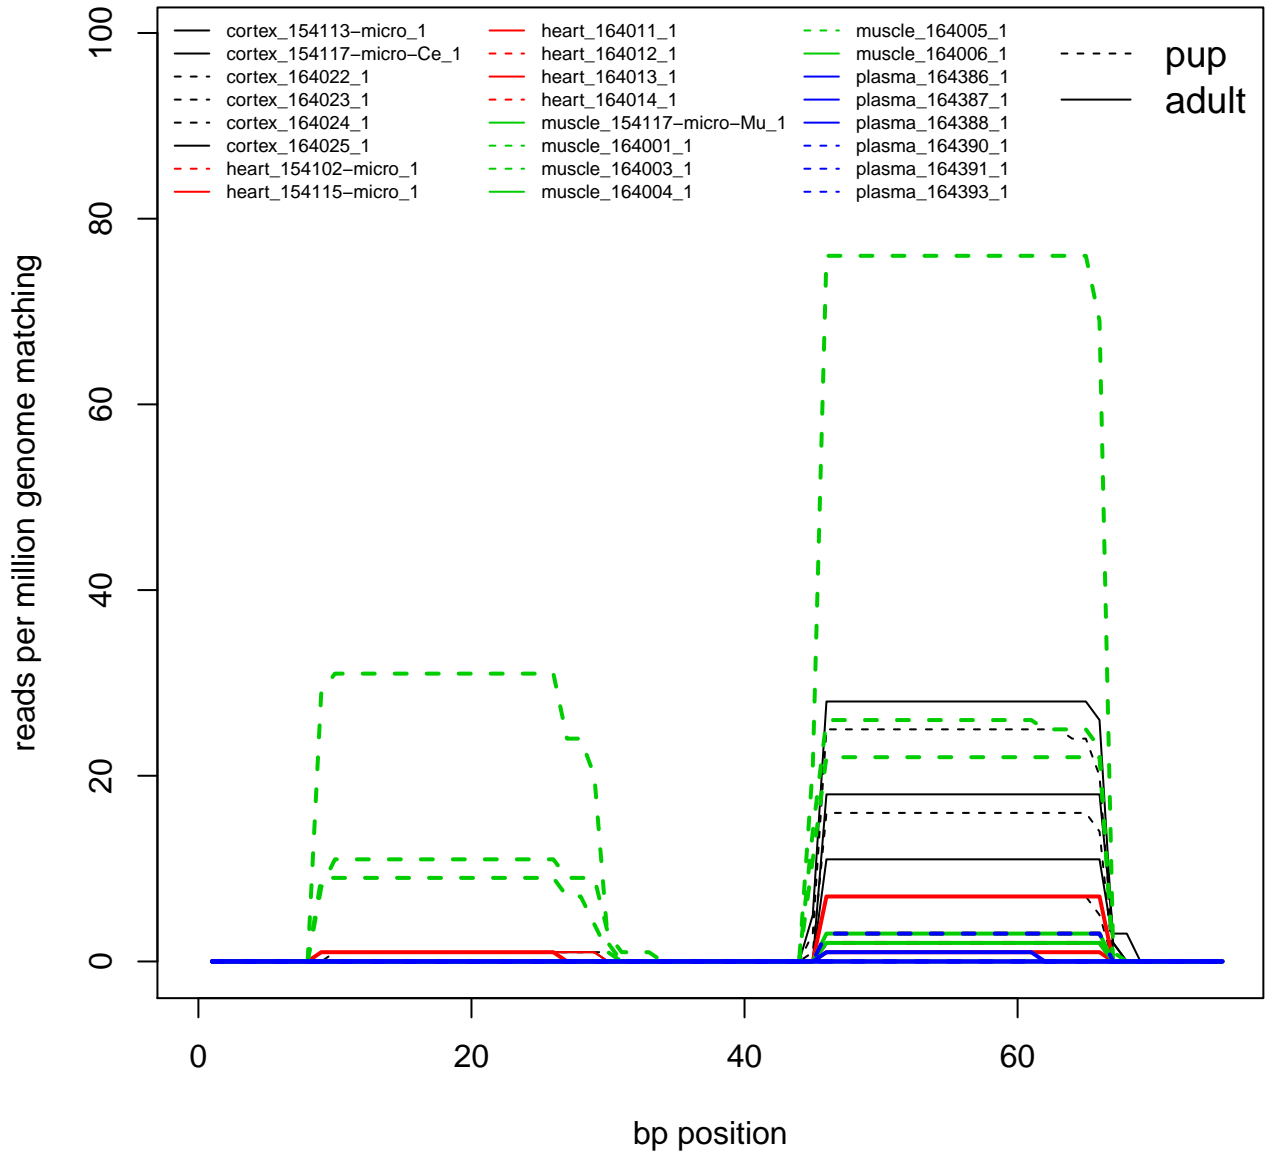

# lwe-miR-376b\_loc2

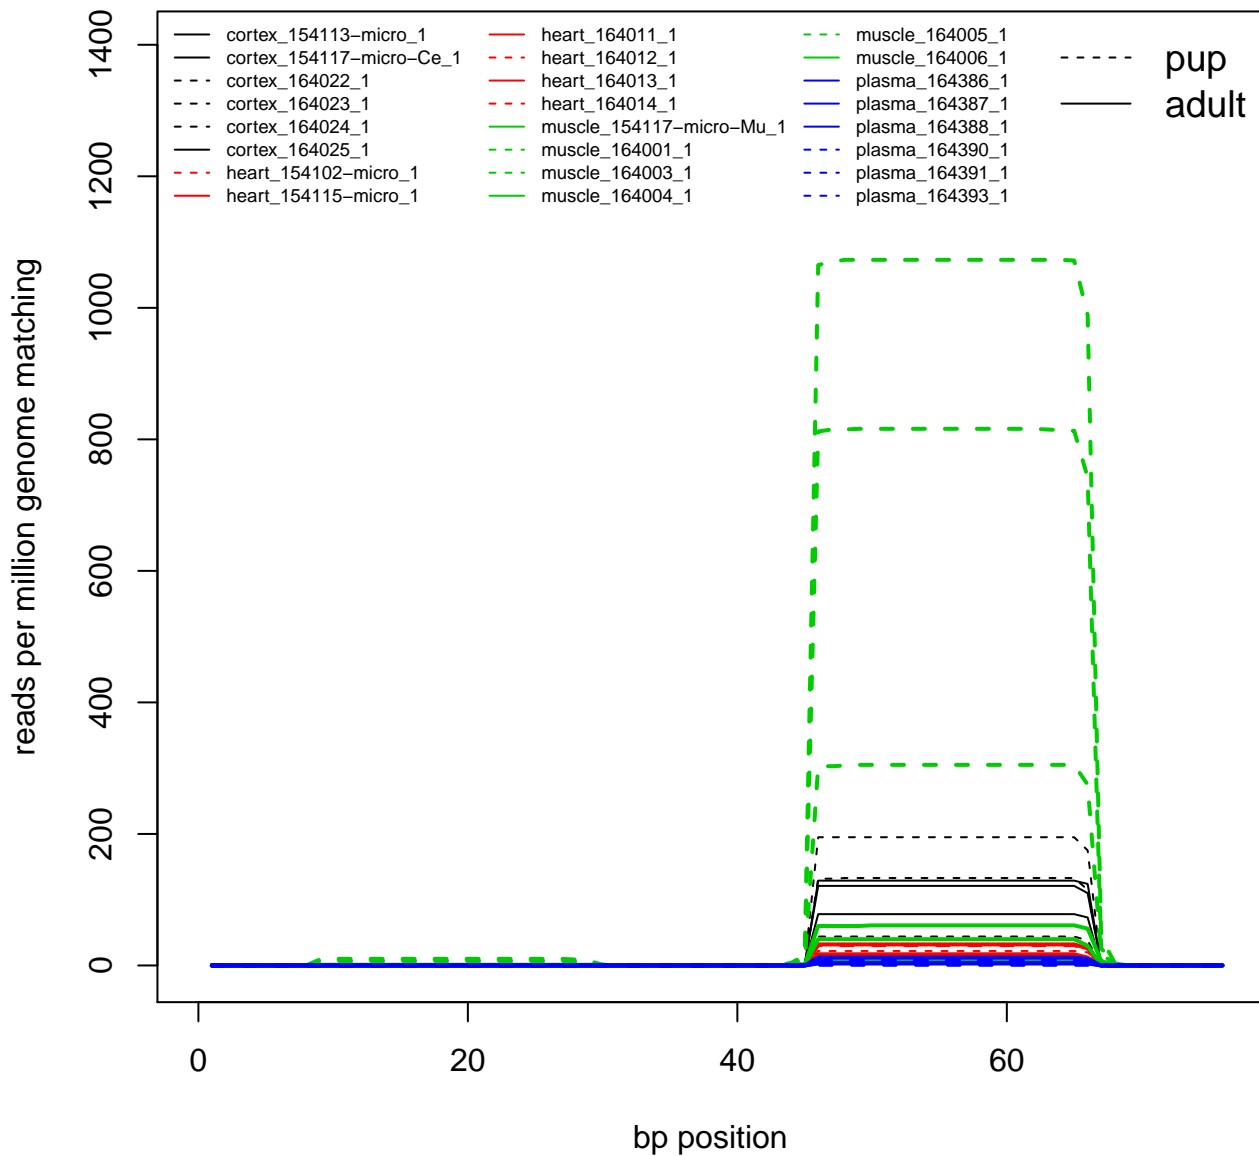

# let-7b\_loc1

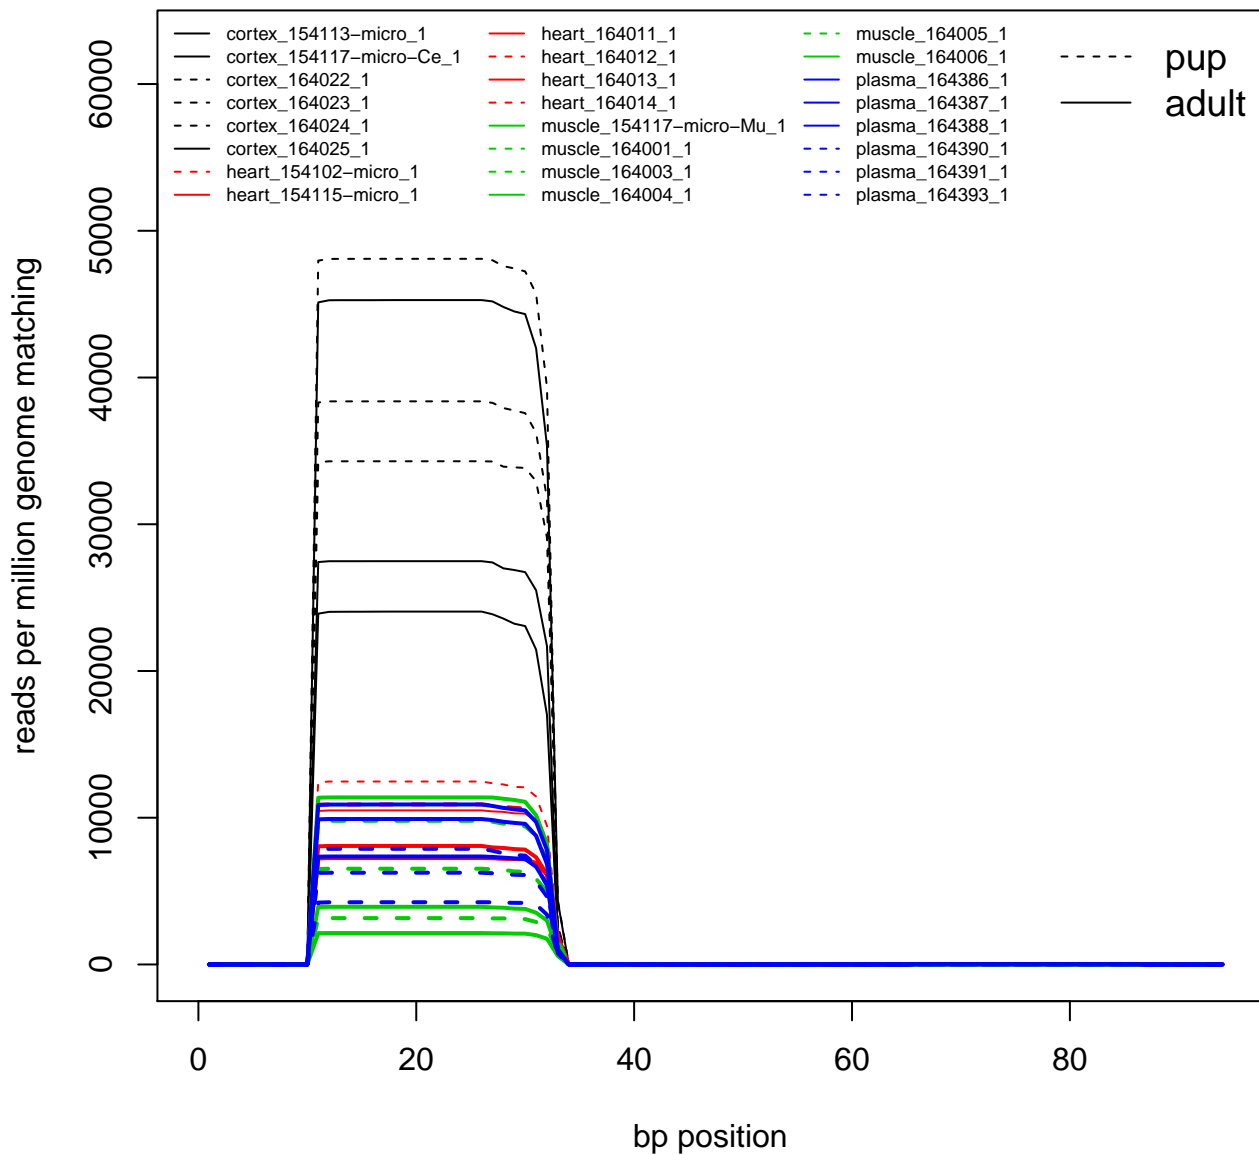



# let-7a\_loc4

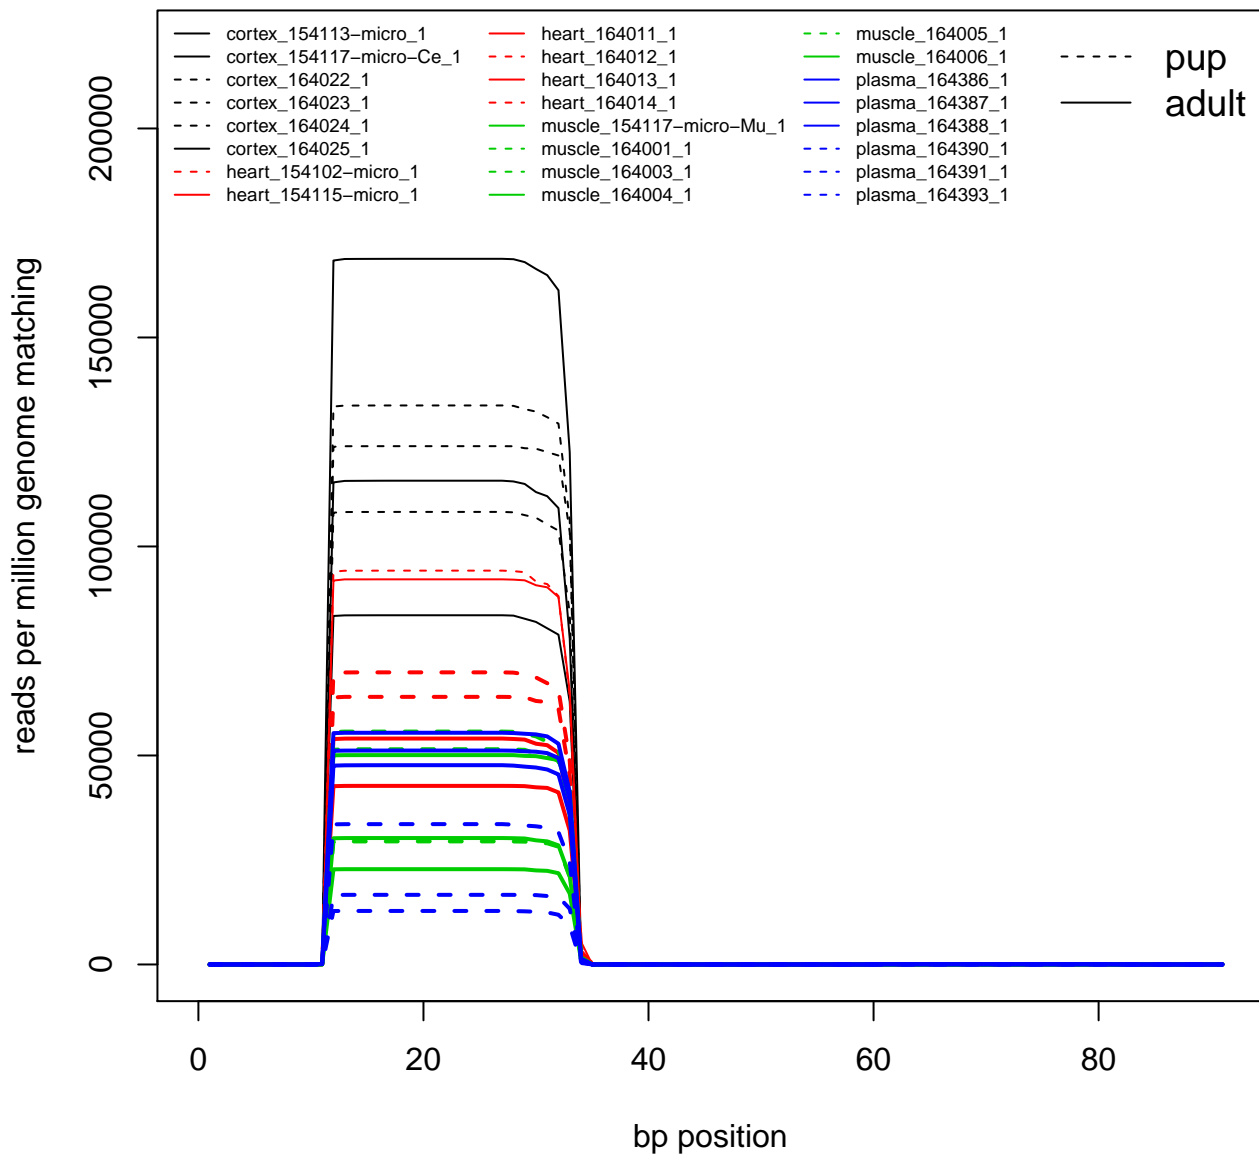

# lwe-miR-218a\_loc2

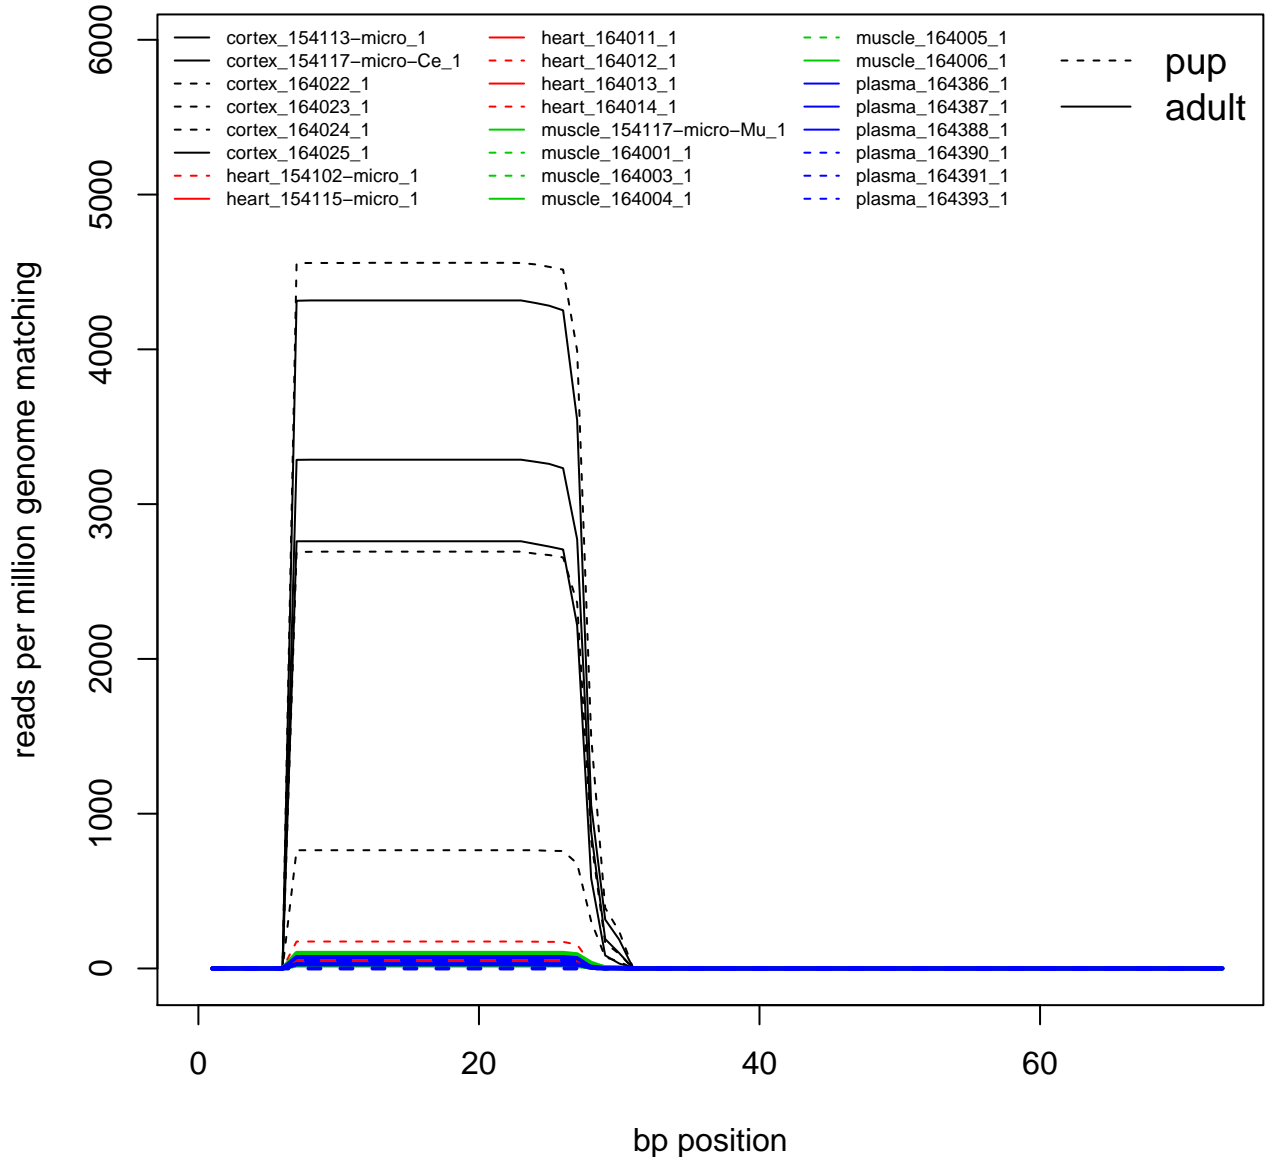

# lwe-miR-455a\_loc1

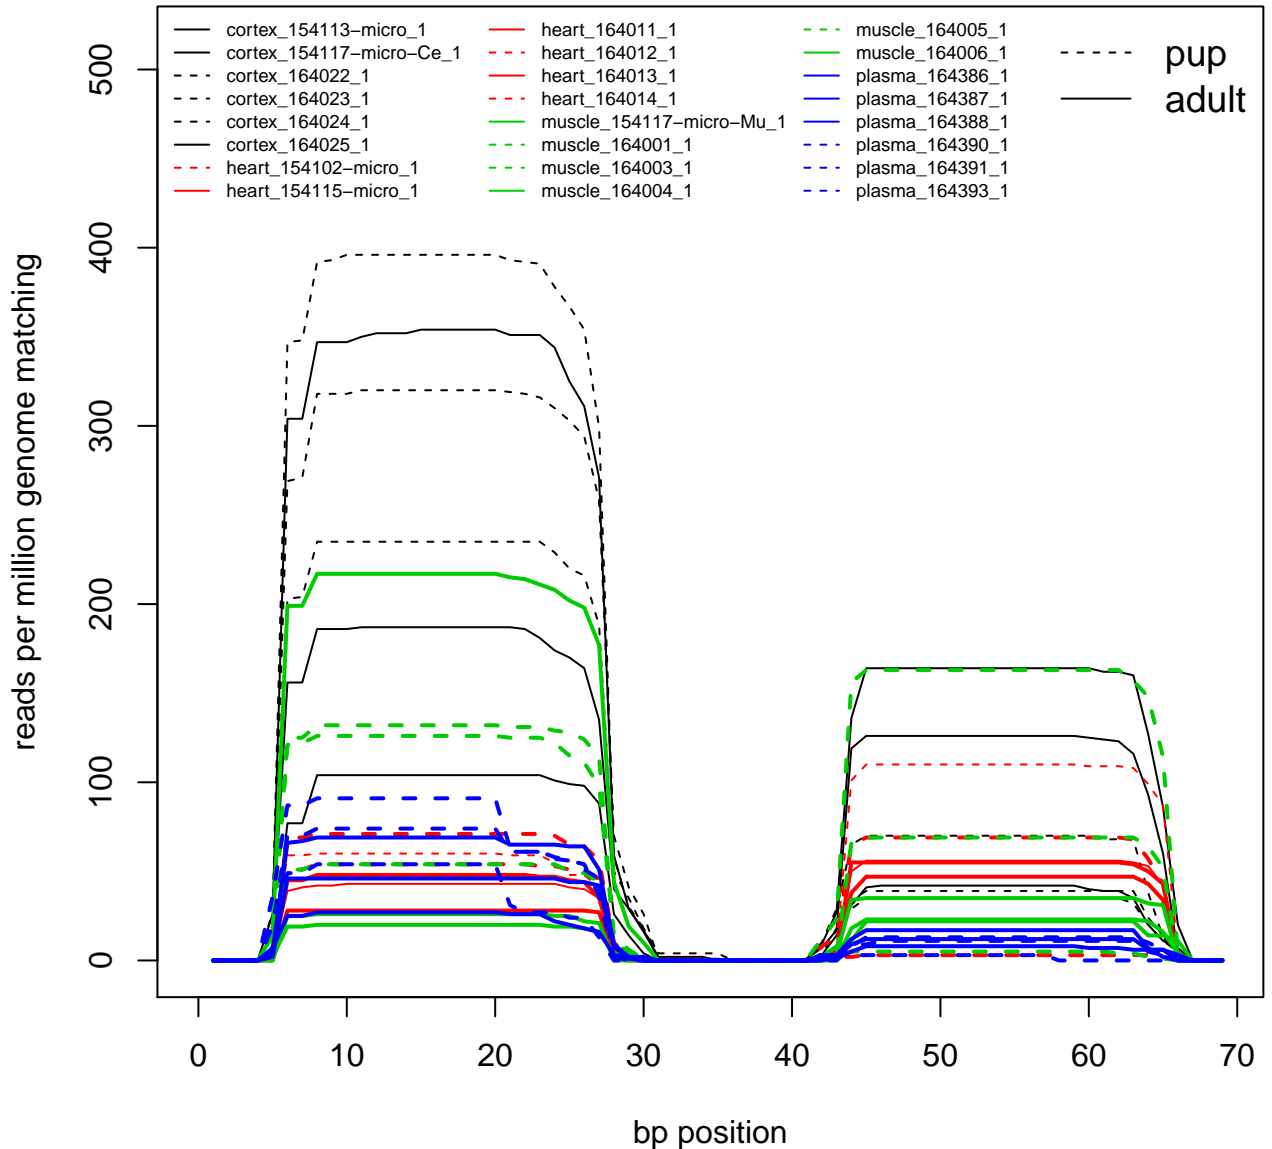

# lwe-miR-124a\_loc3

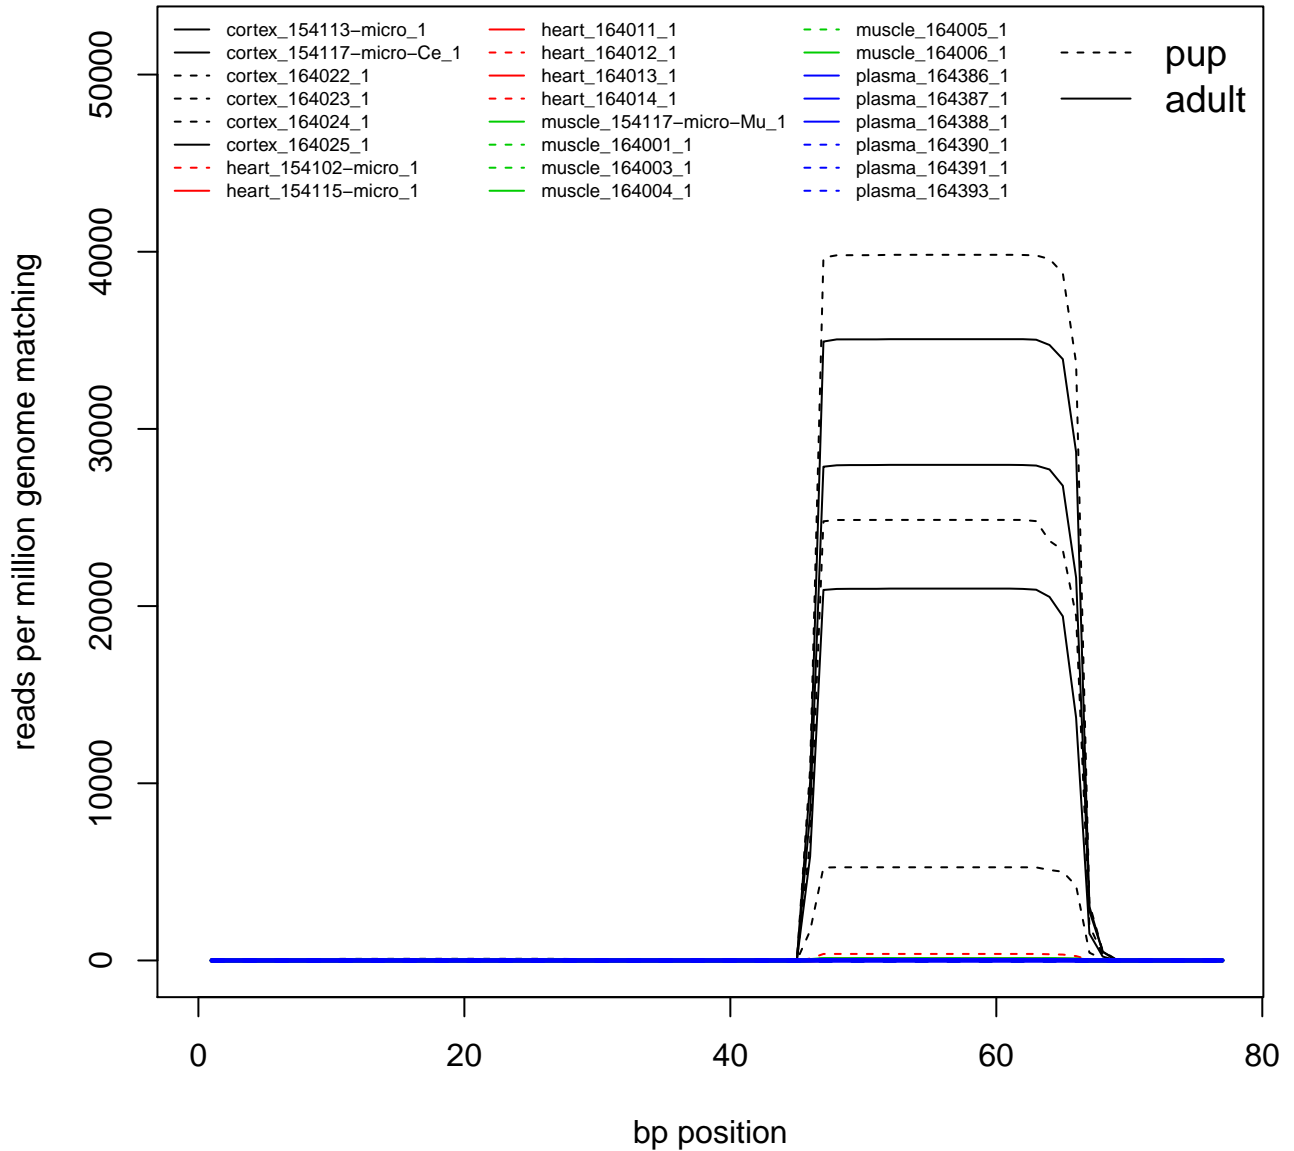

# novel\_127

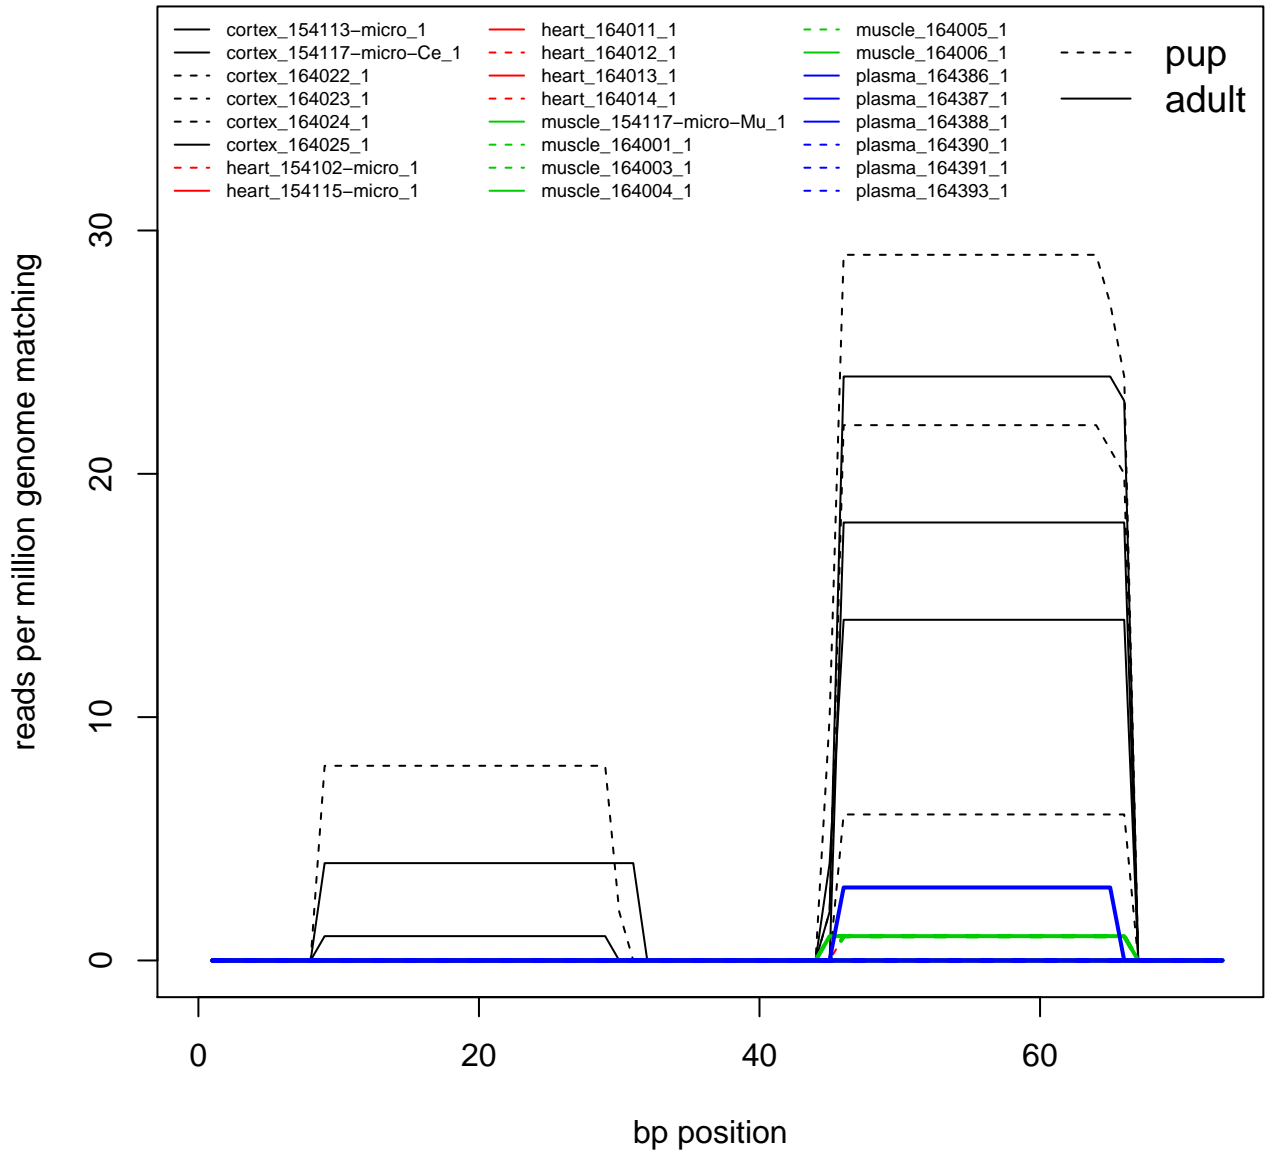

# lwe-miR-181d\_loc1

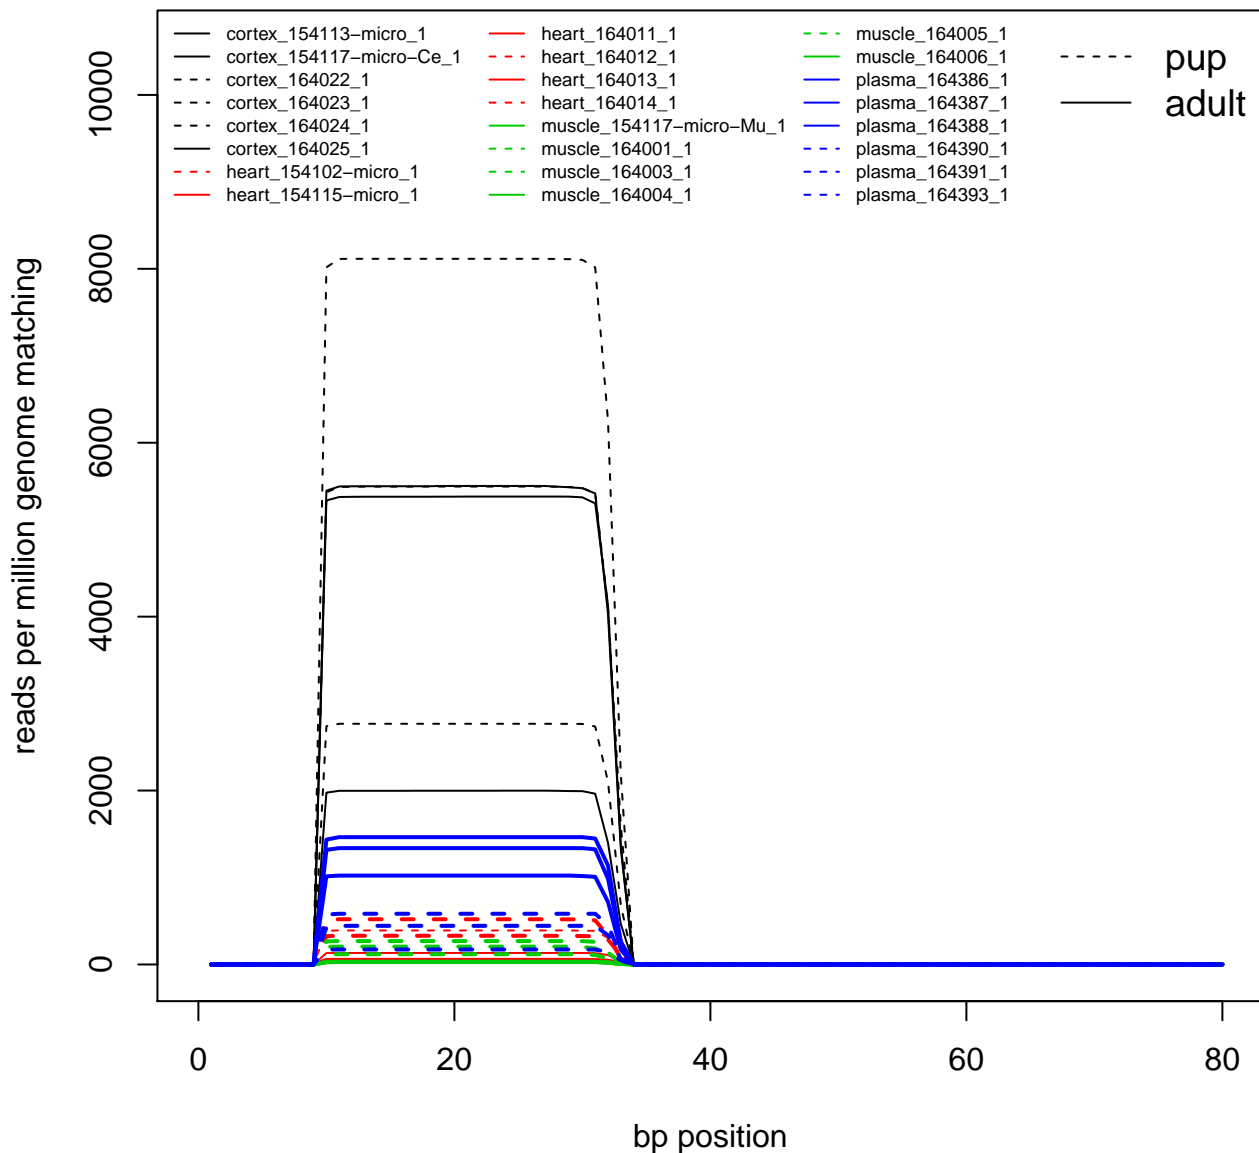

# lwe-miR-181a\_loc3

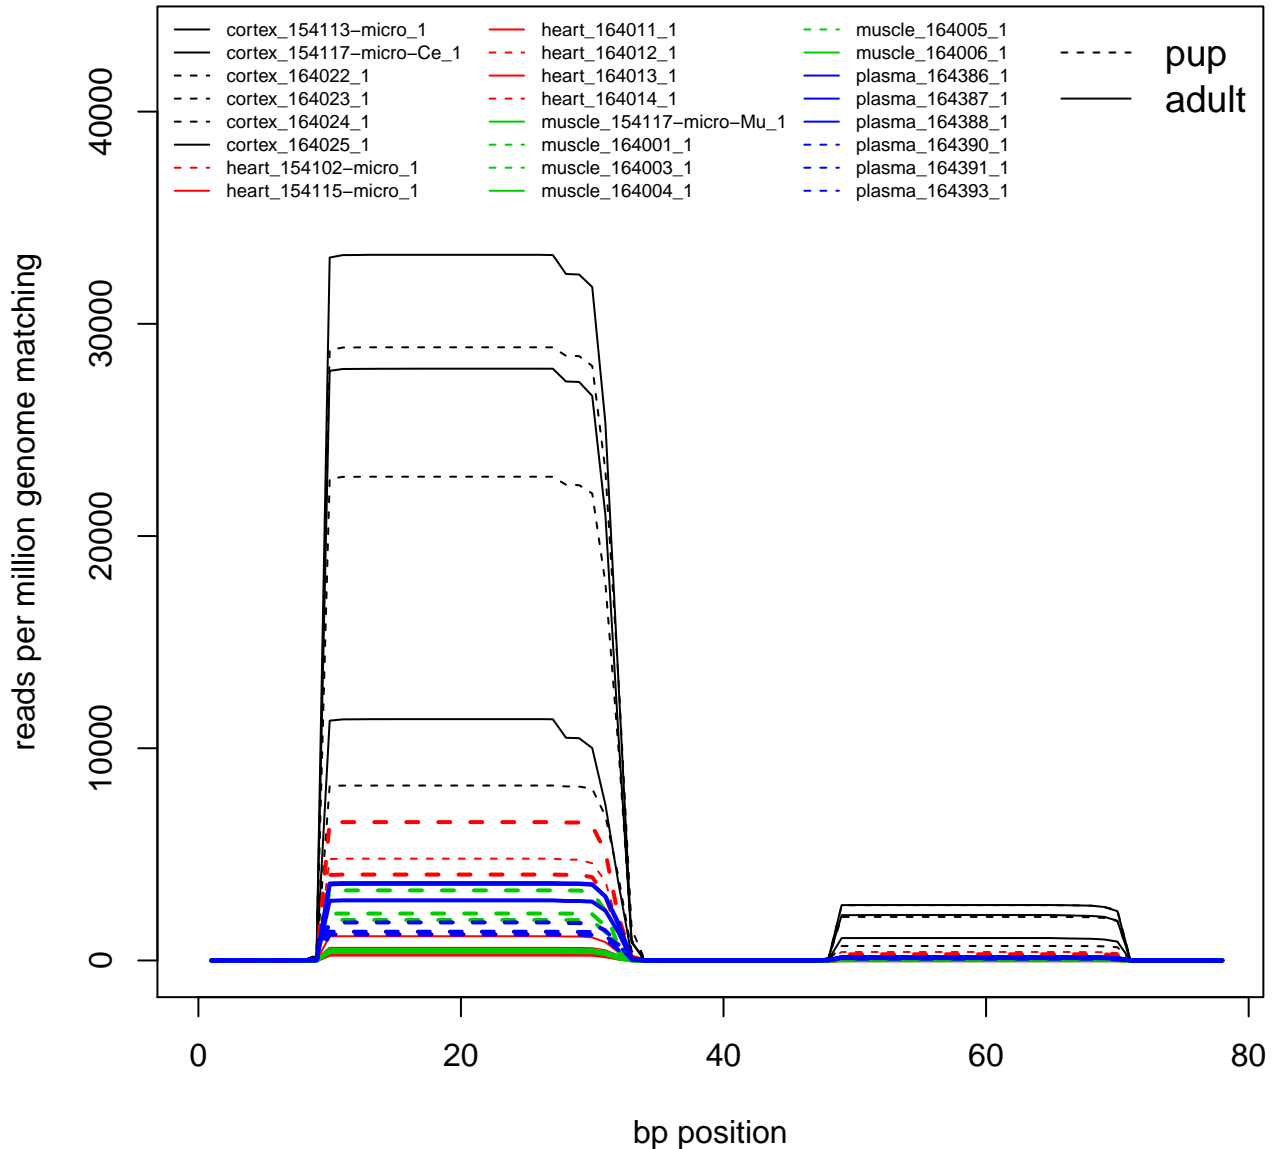

# novel\_128

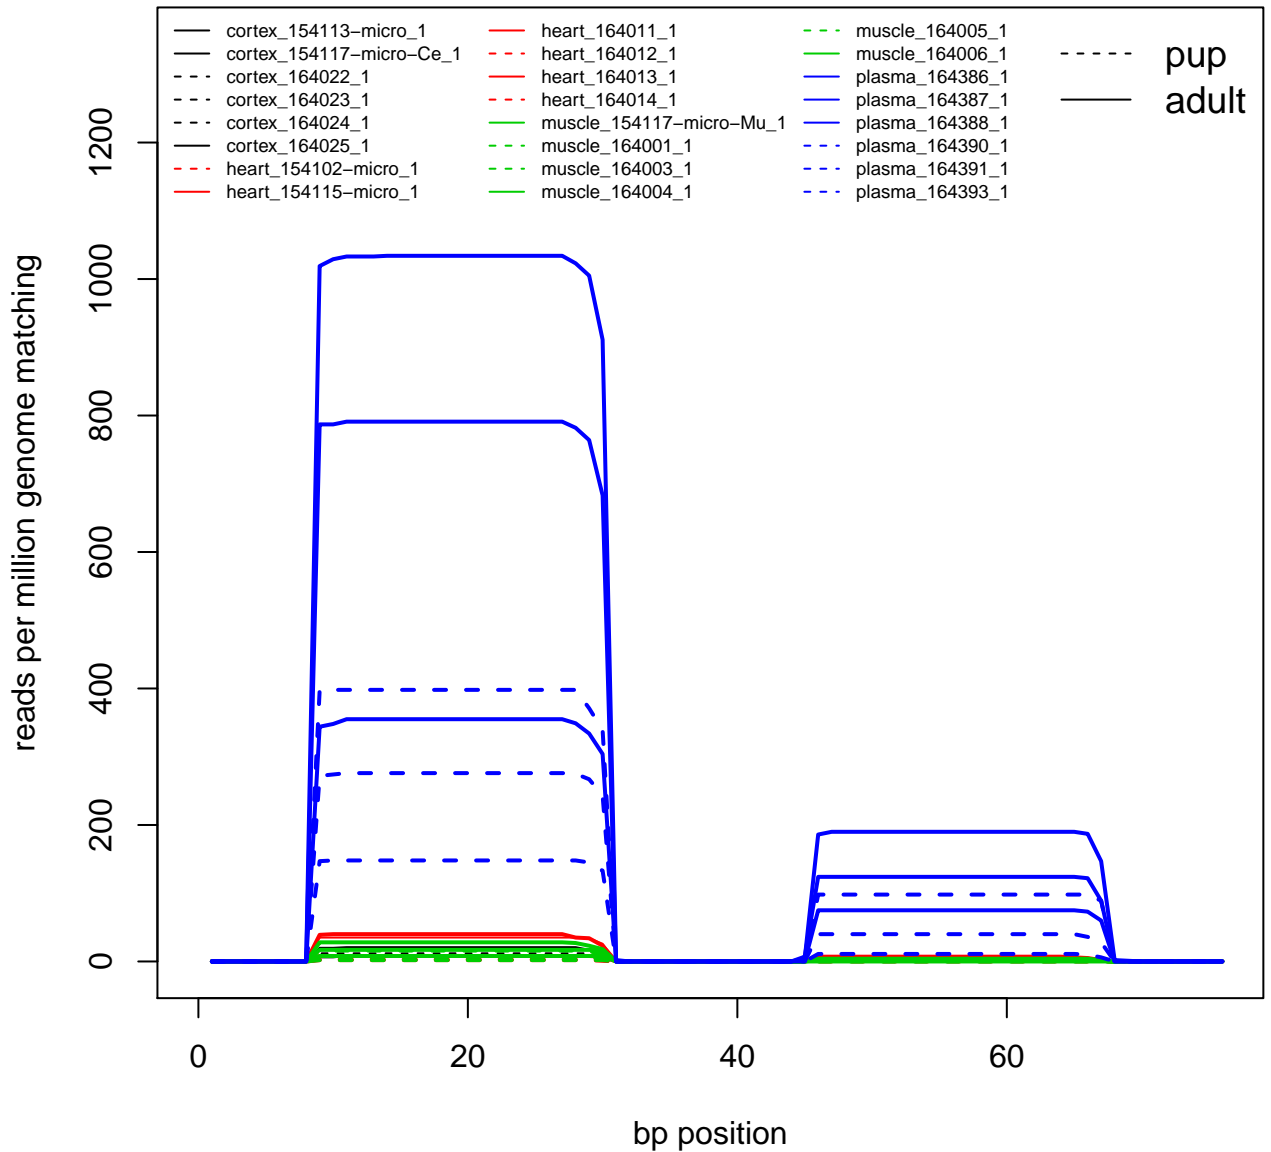



# lwe-miR-149\_loc1

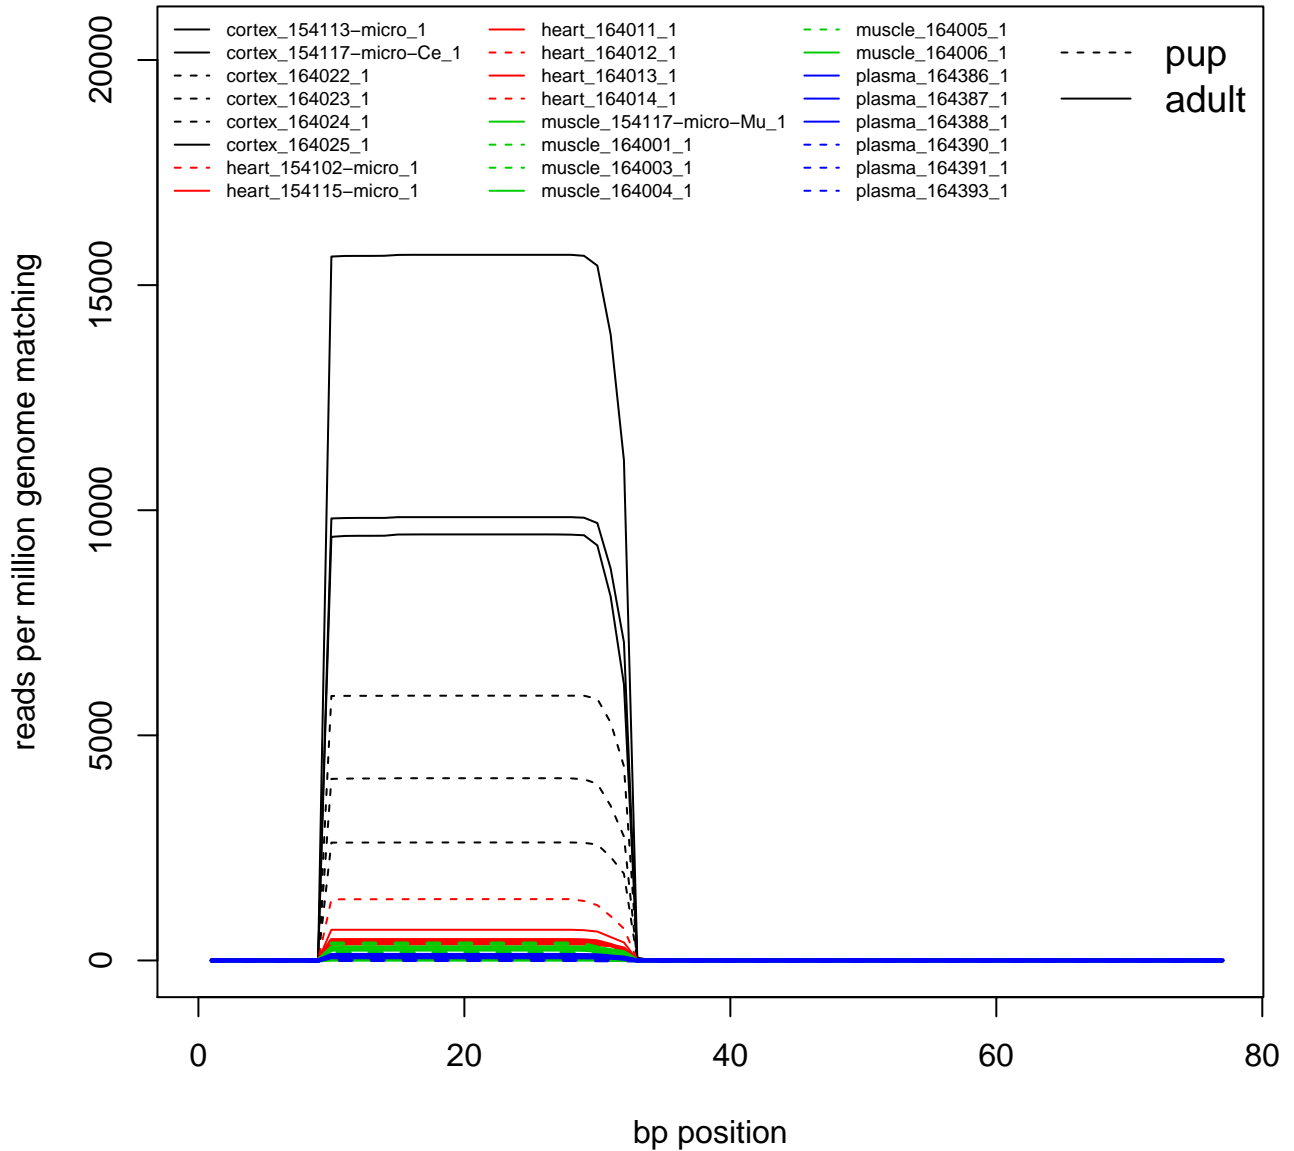

# novel\_129

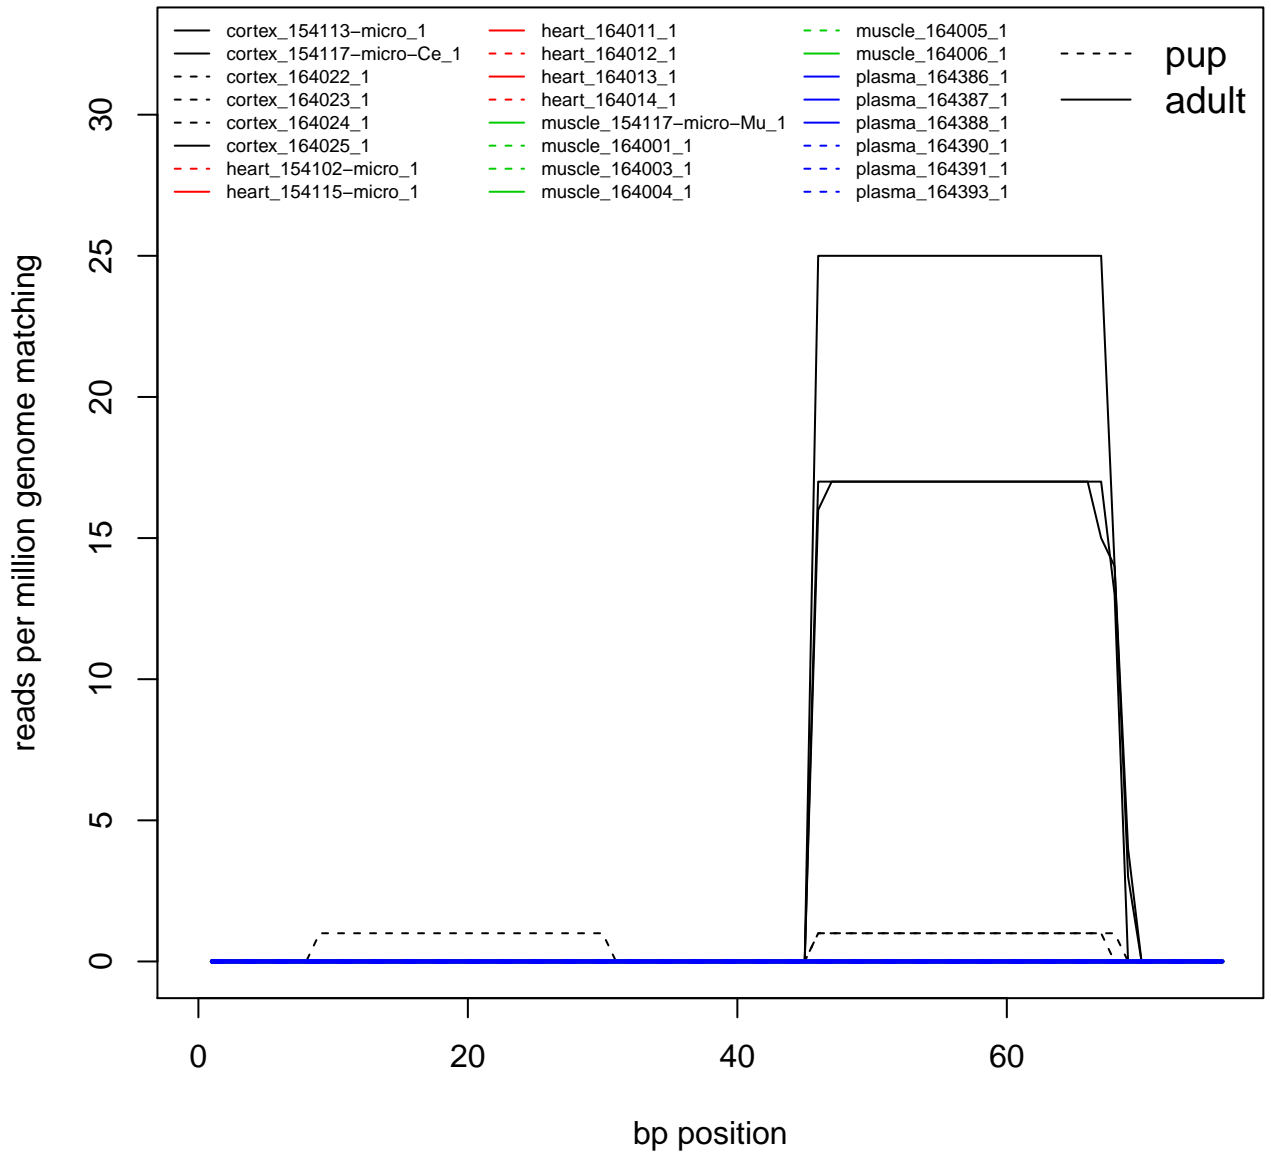



# novel\_132

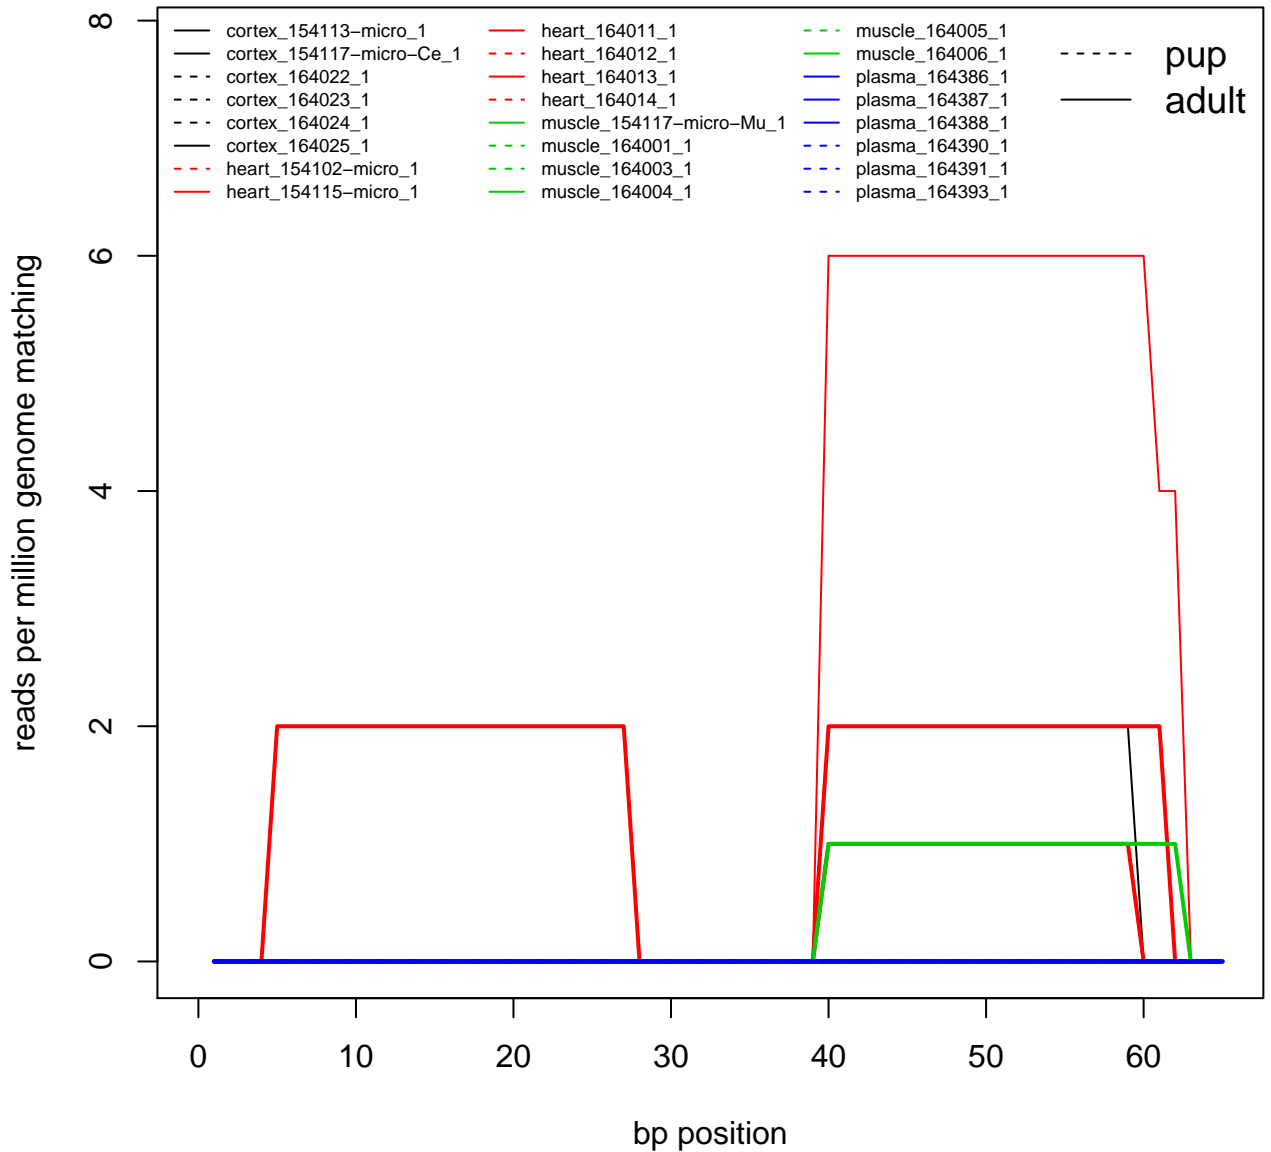



# novel\_130

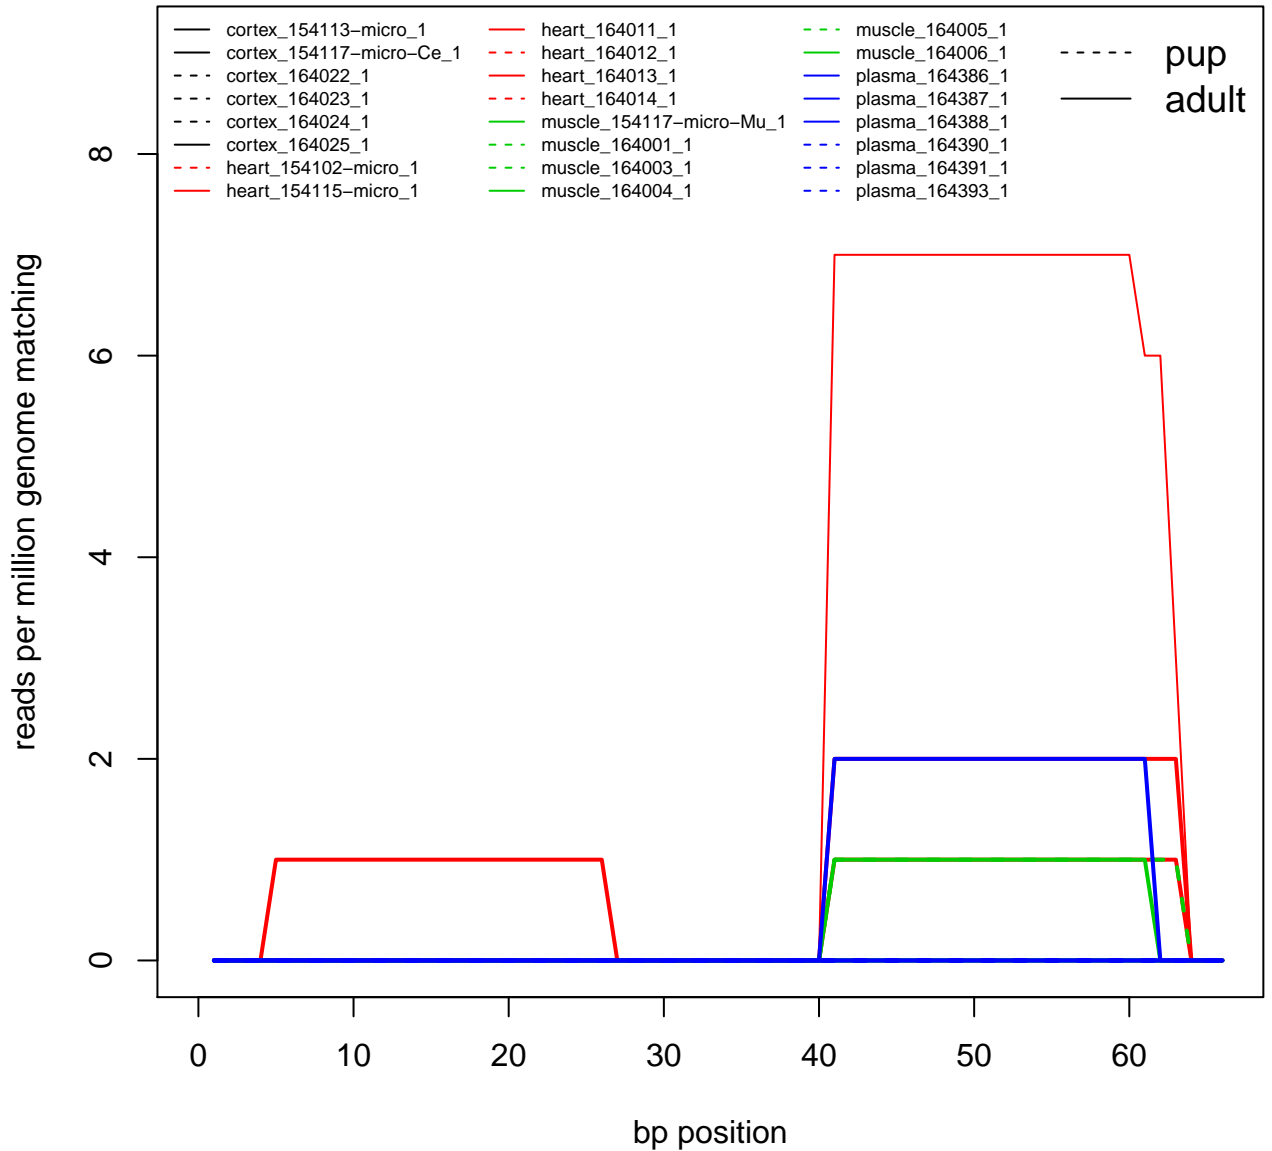

# novel\_134

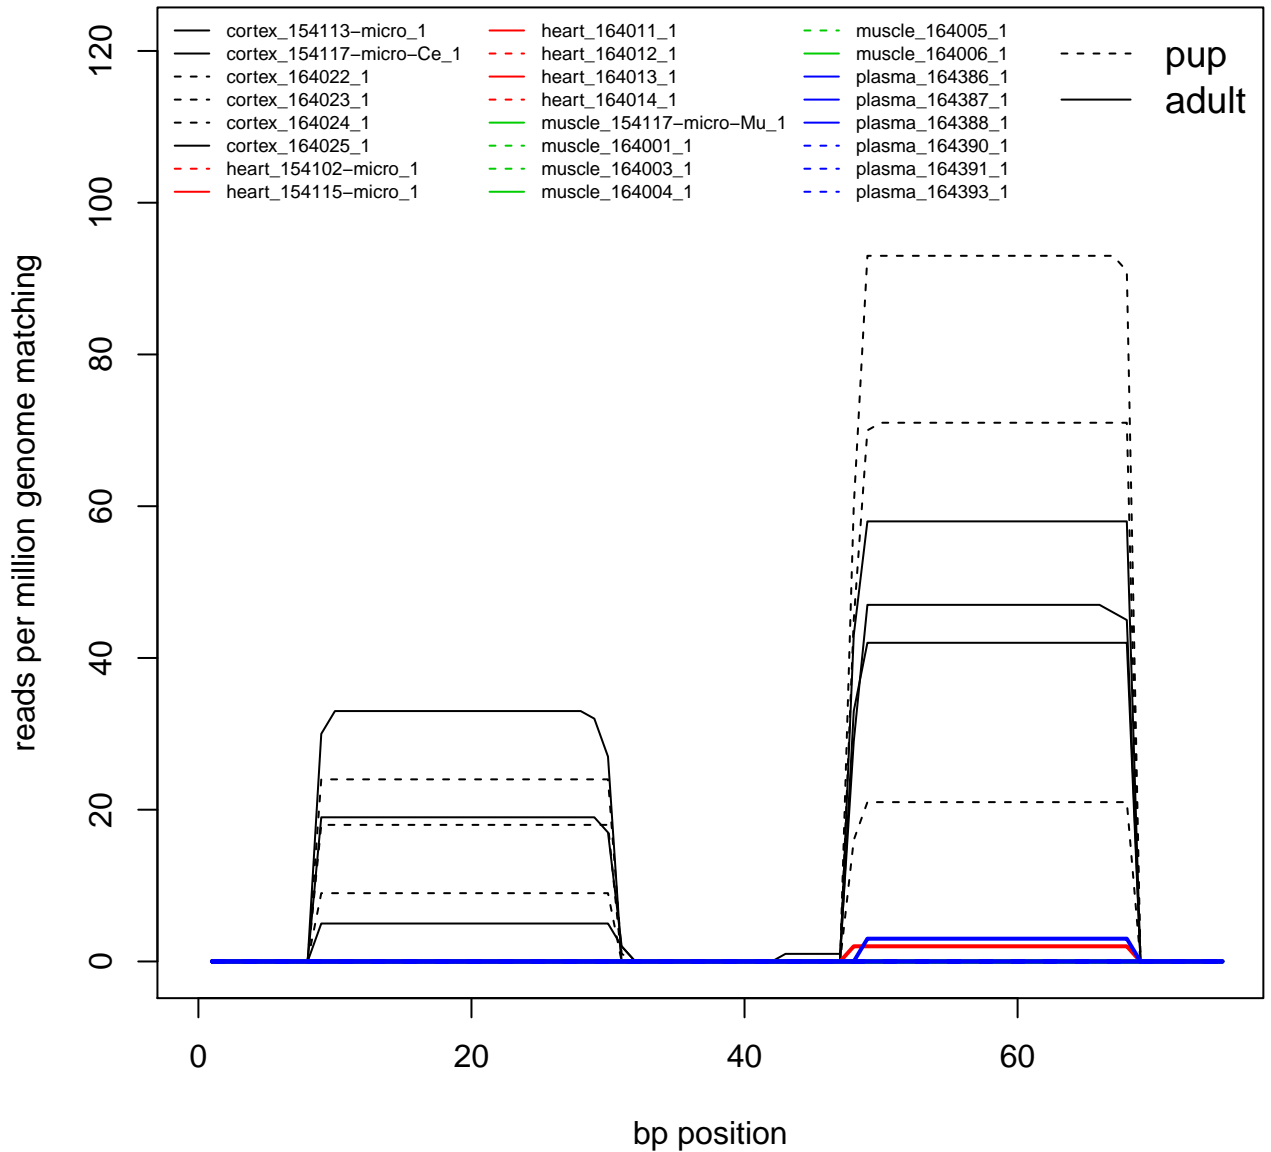

# lwe-miR-3069\_loc1

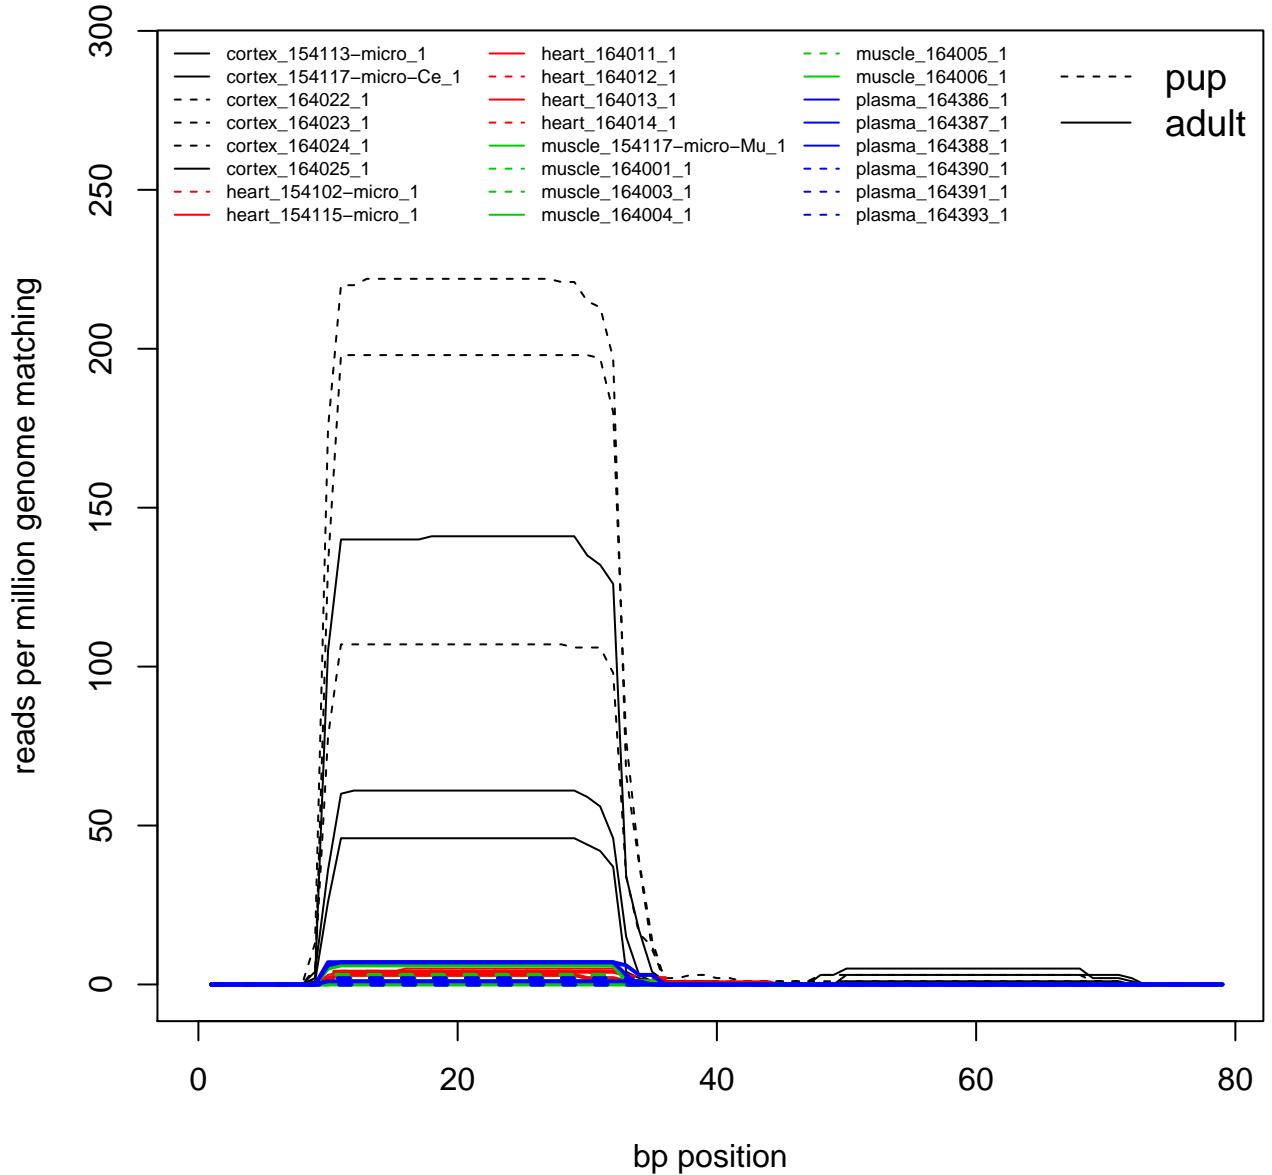







# novel\_138

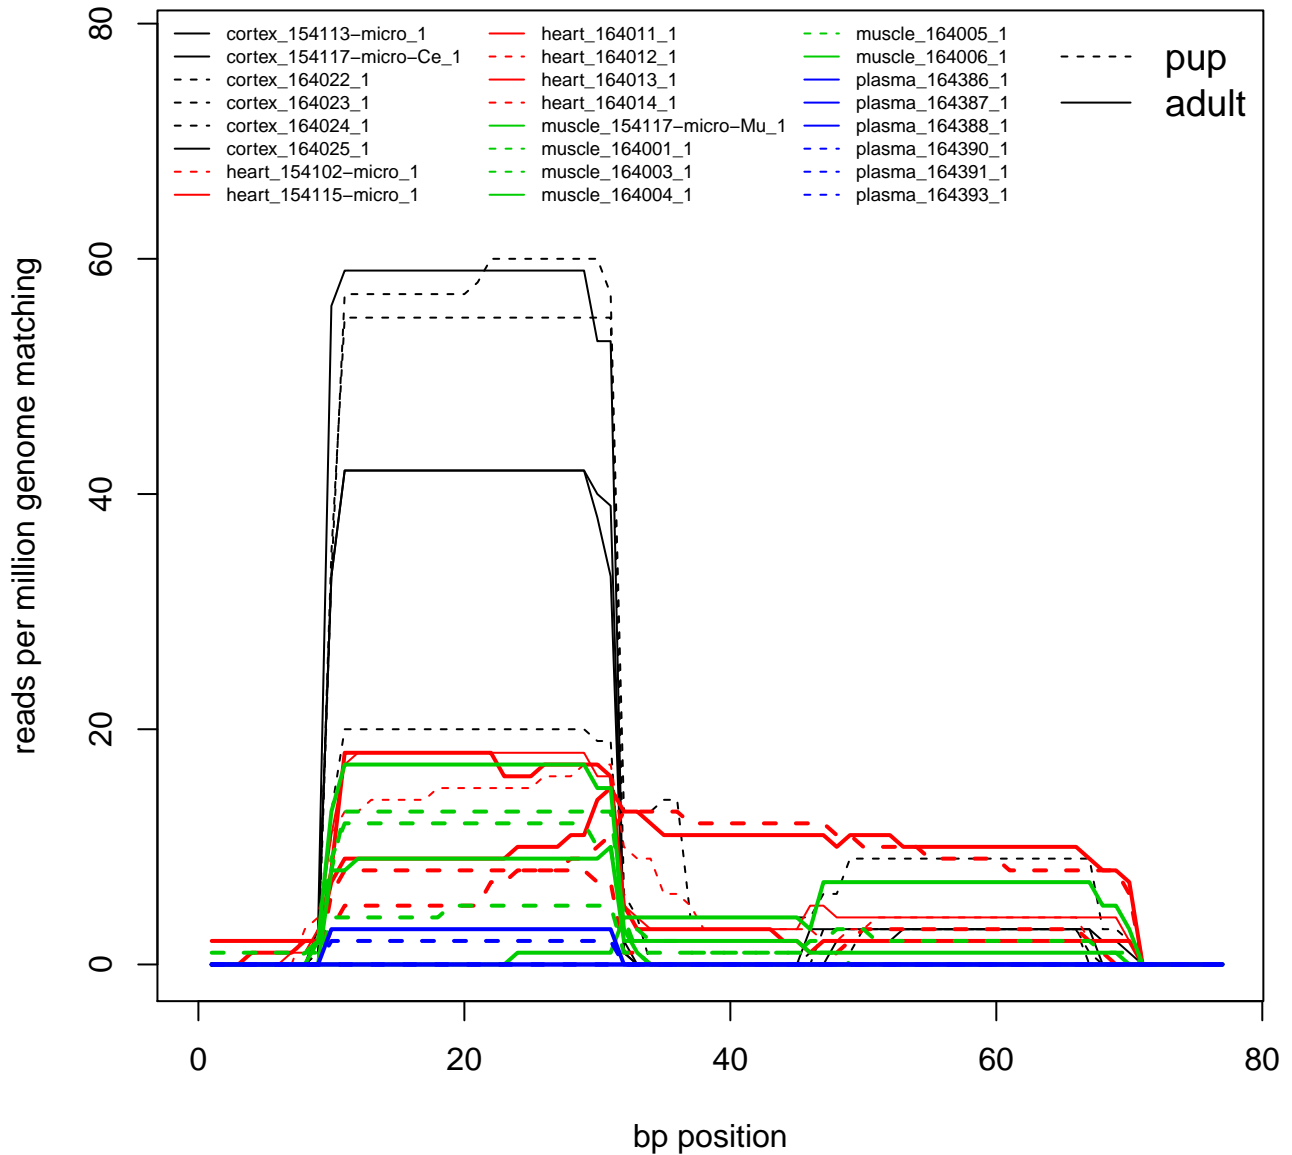

# lwe-miR-200b\_loc1

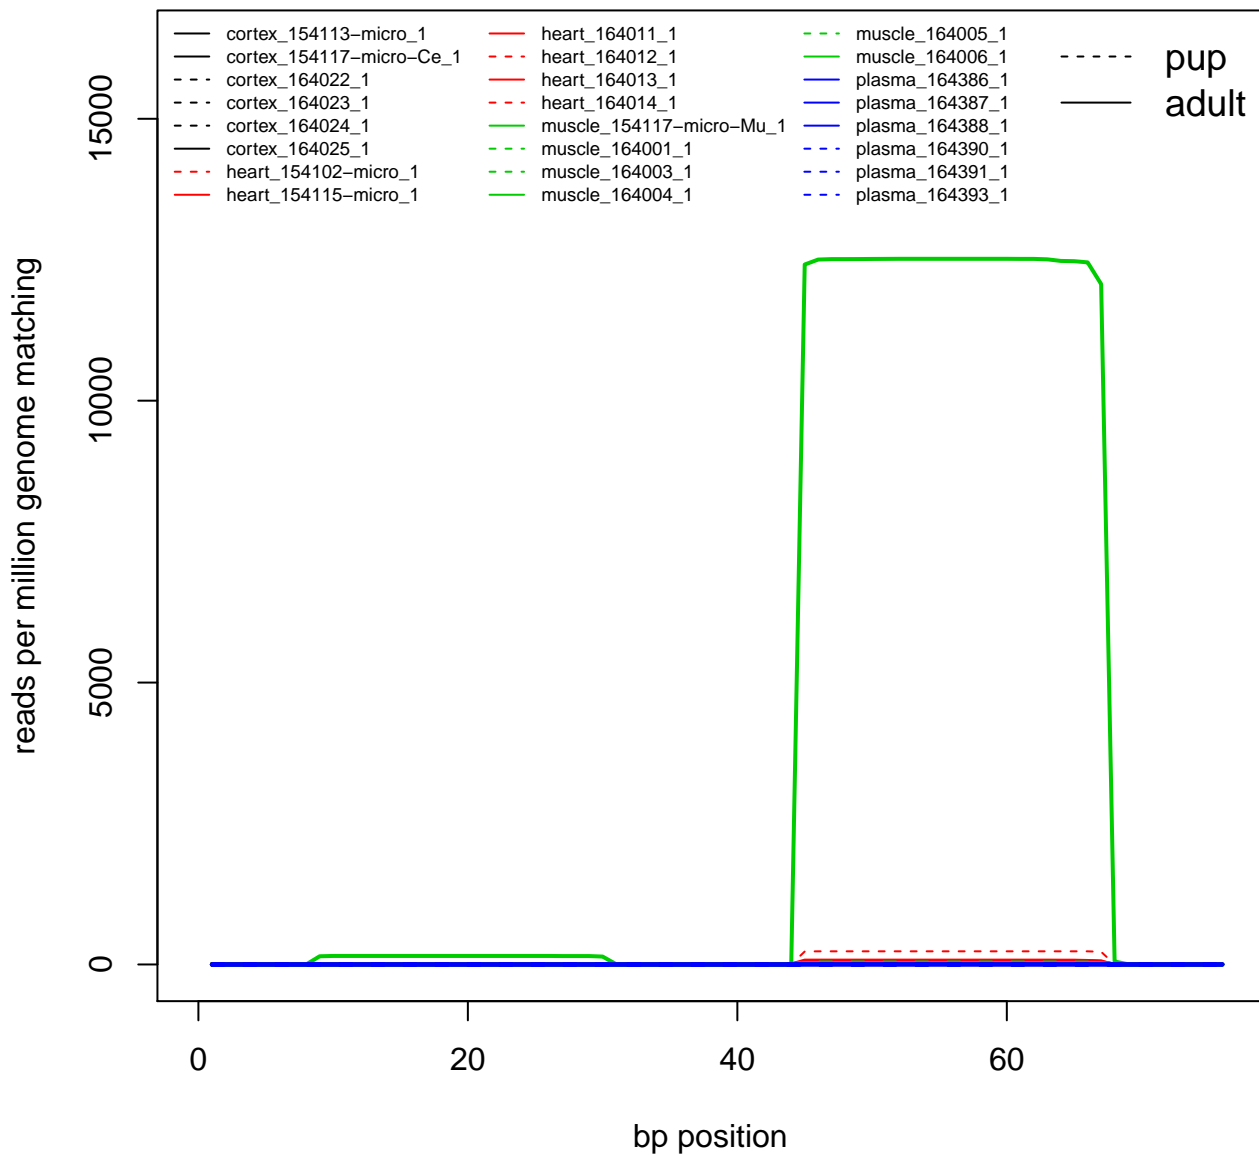

# Iwe-miR-98\_loc1

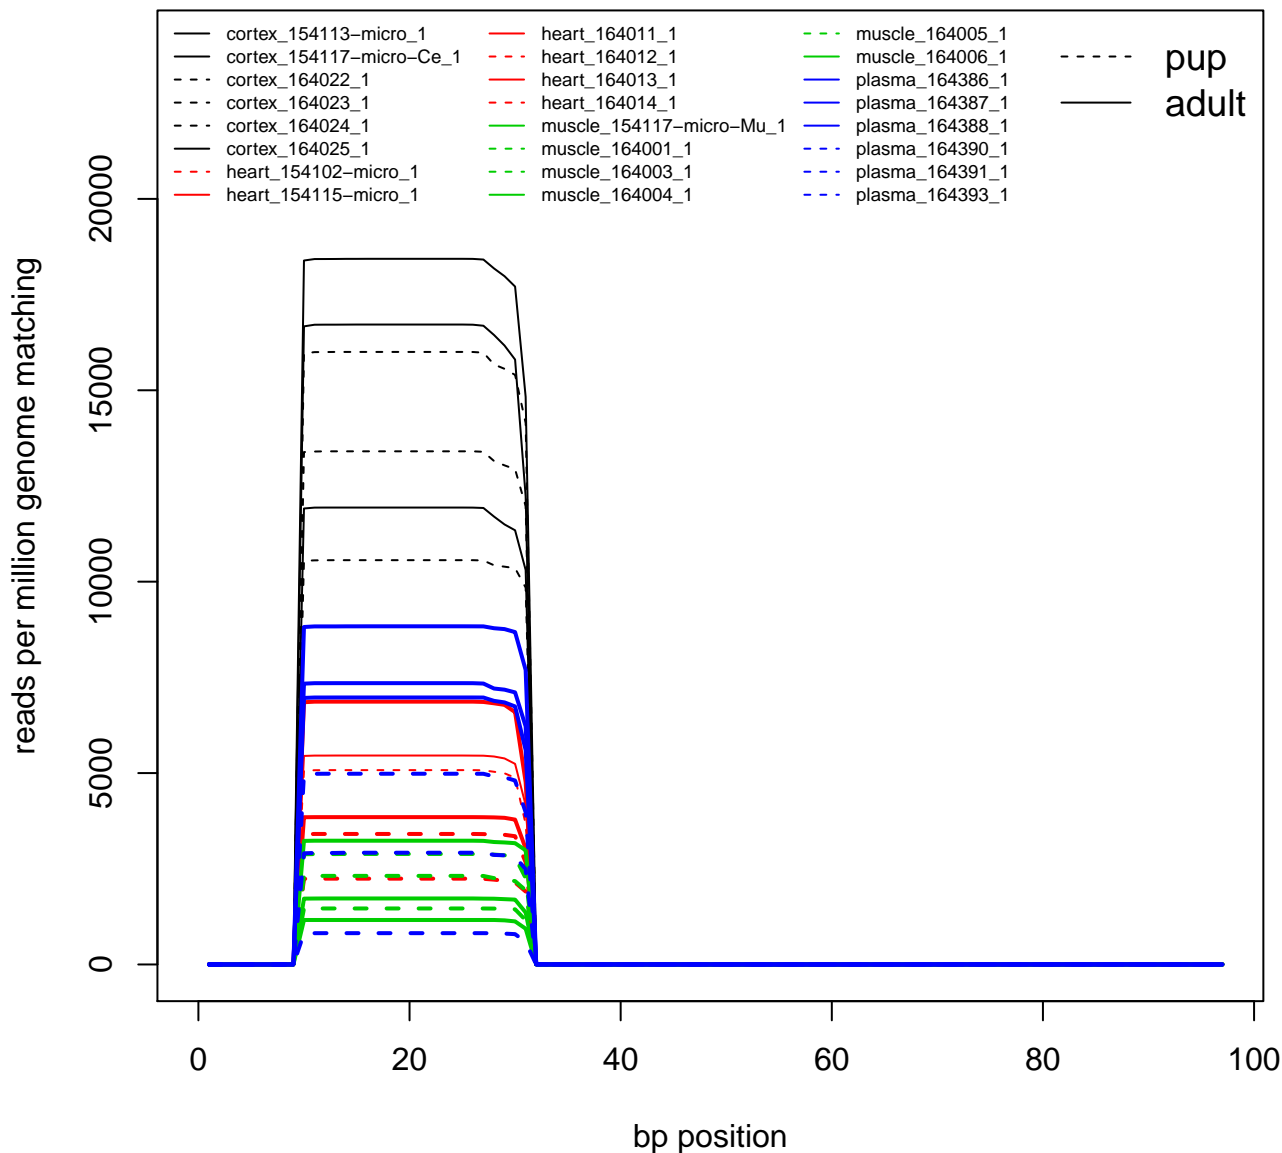



# lwe-miR-191a\_loc1

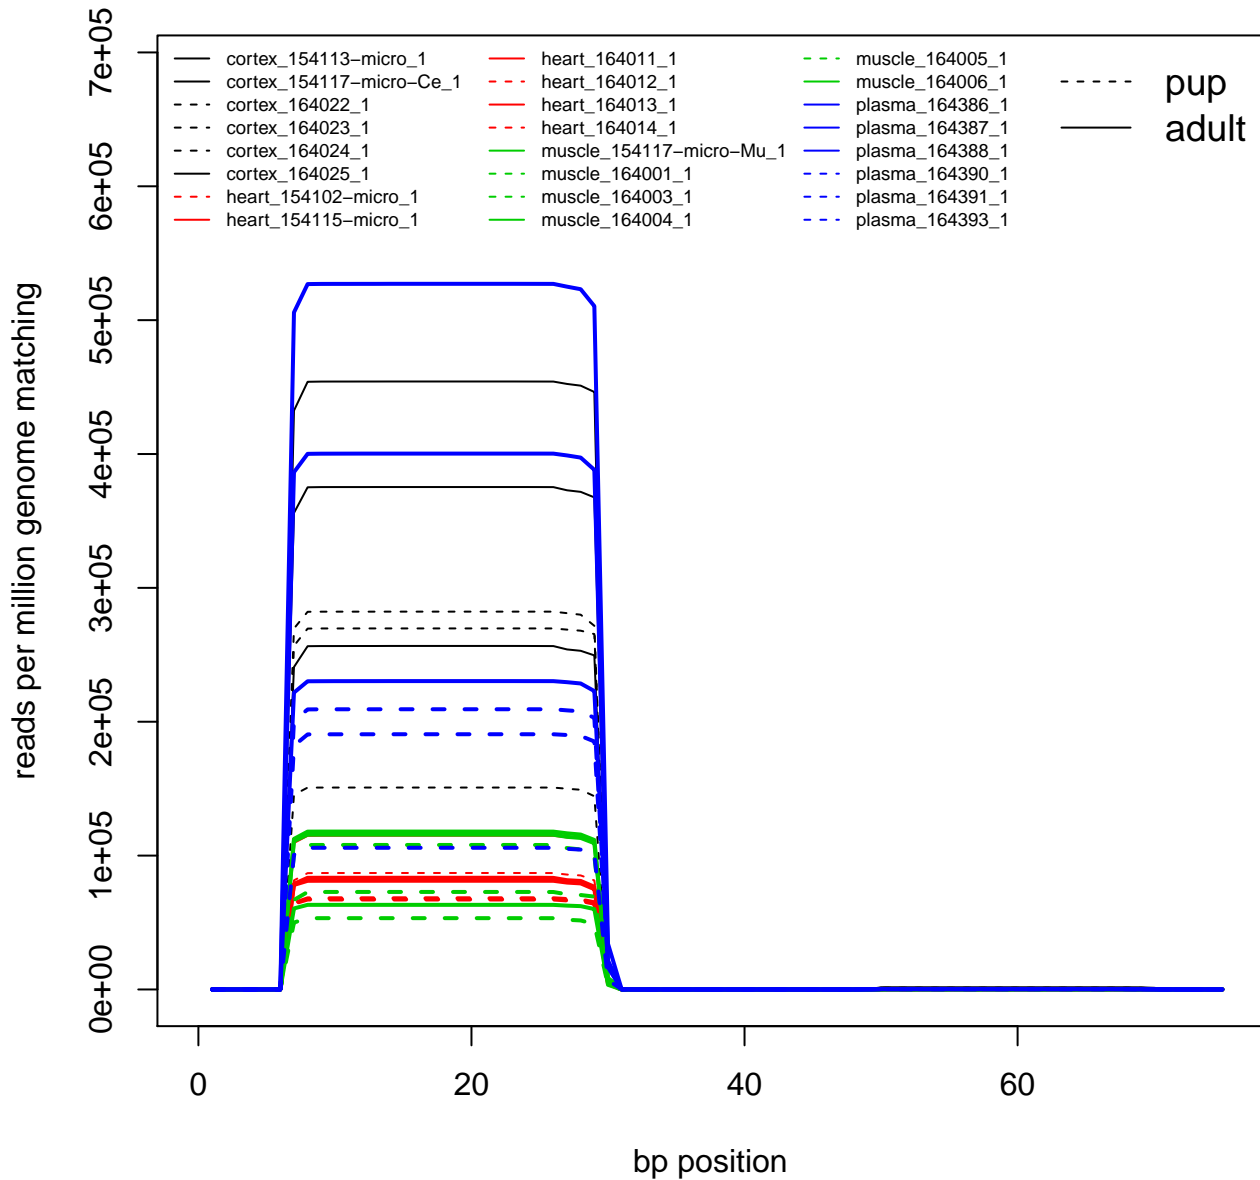

# lwe-miR-425\_loc1

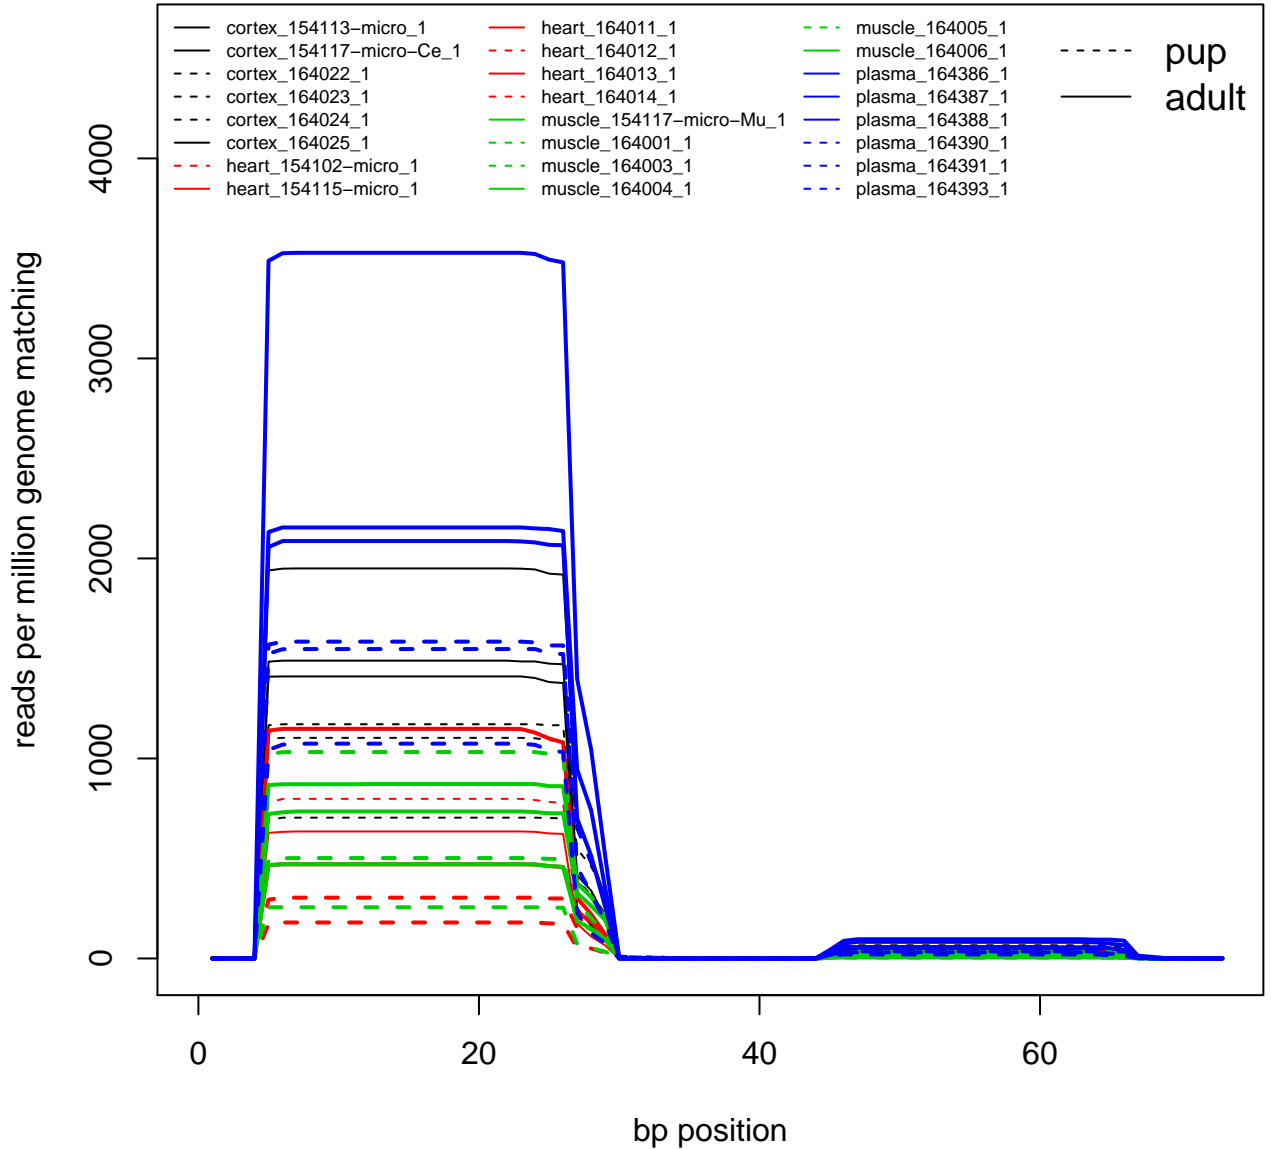



# lwe-miR-146a\_loc1

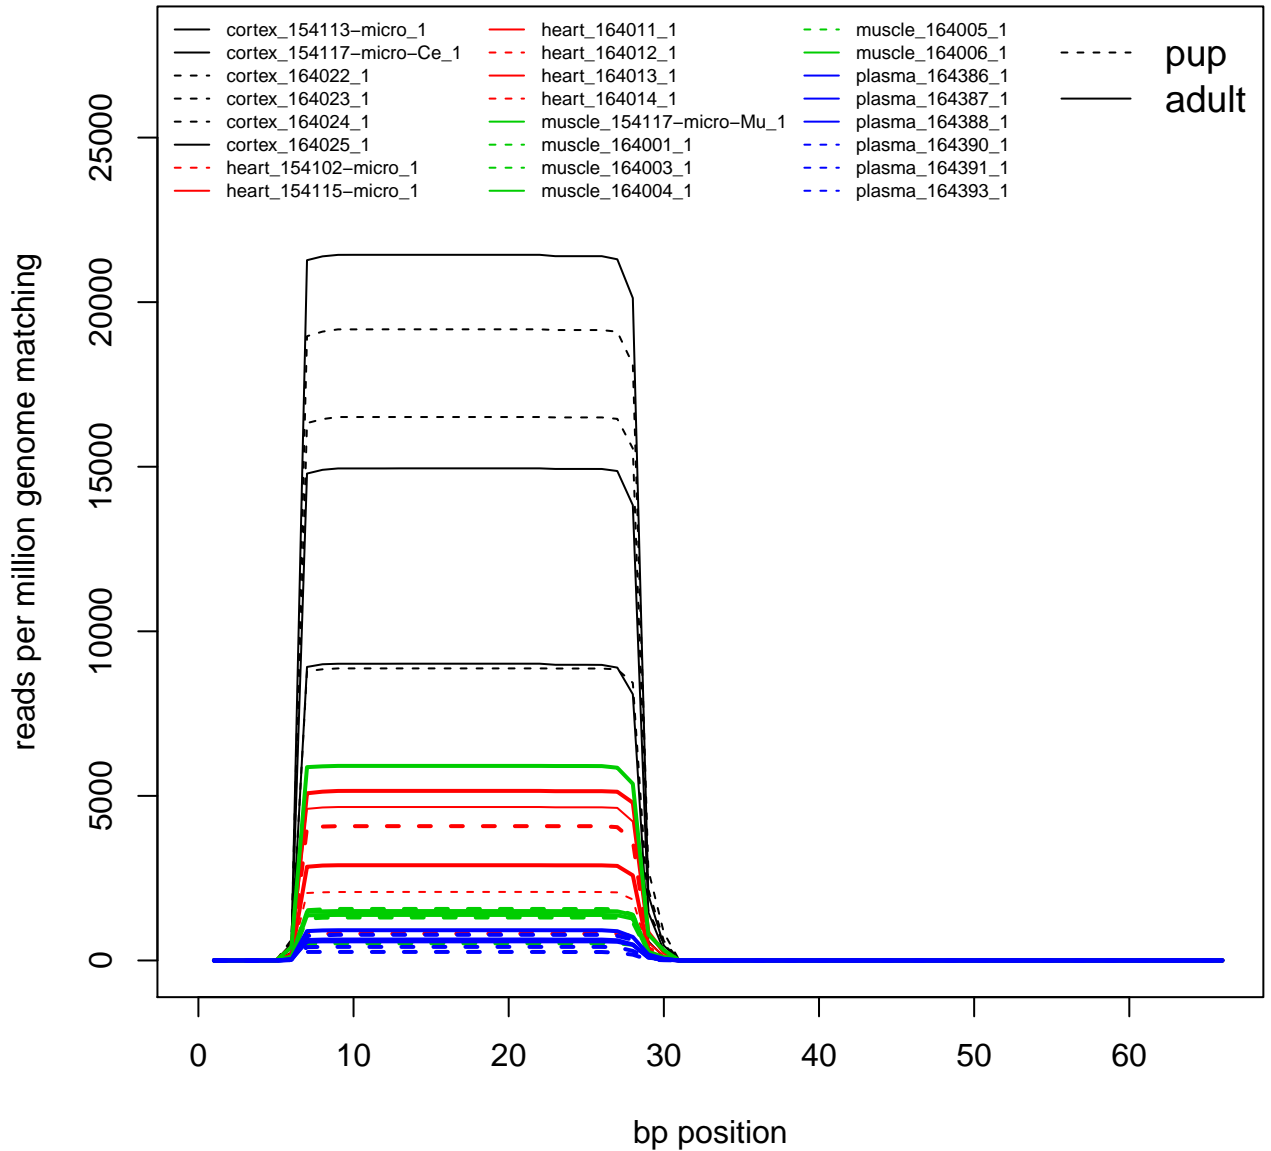

# lwe-miR-130b\_loc1

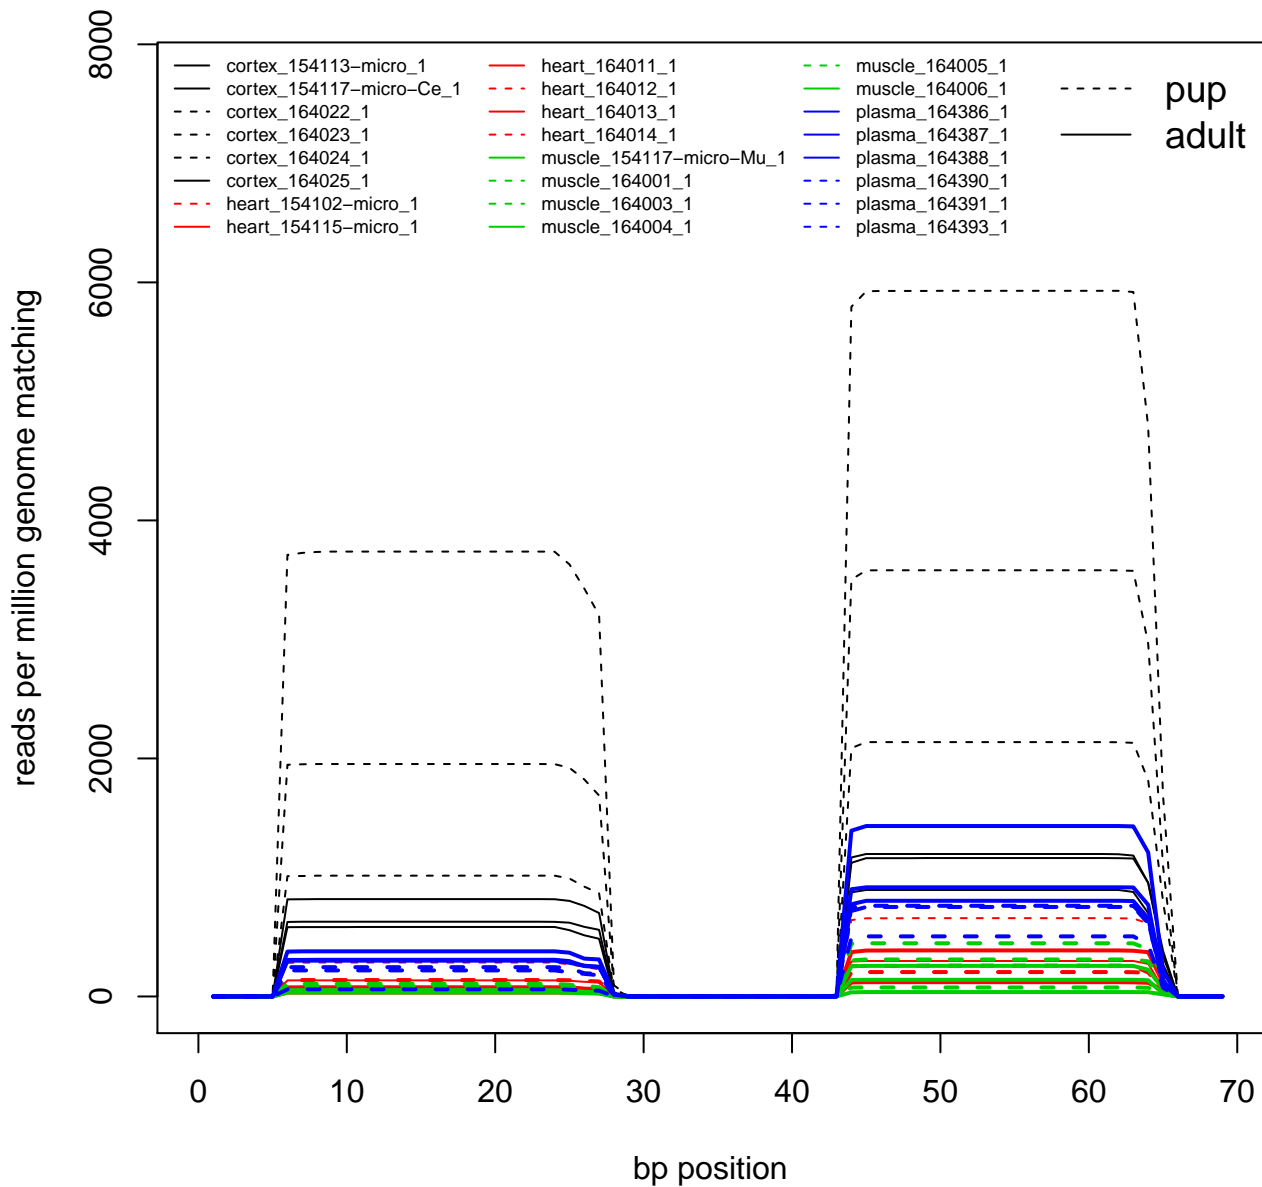

# novel\_139

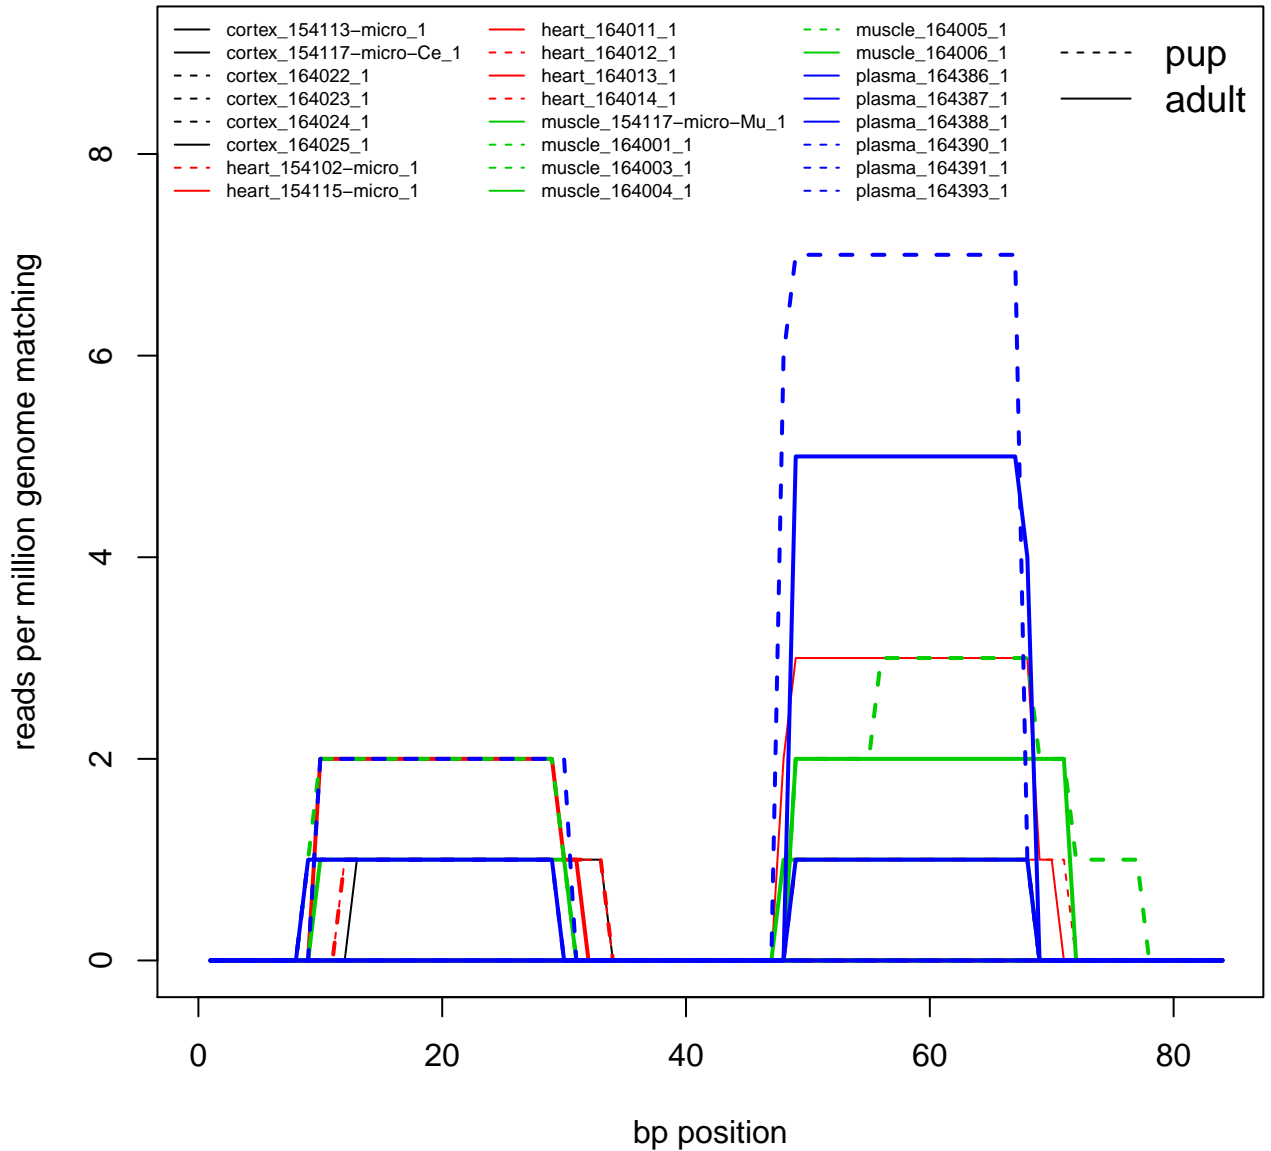

# novel\_140

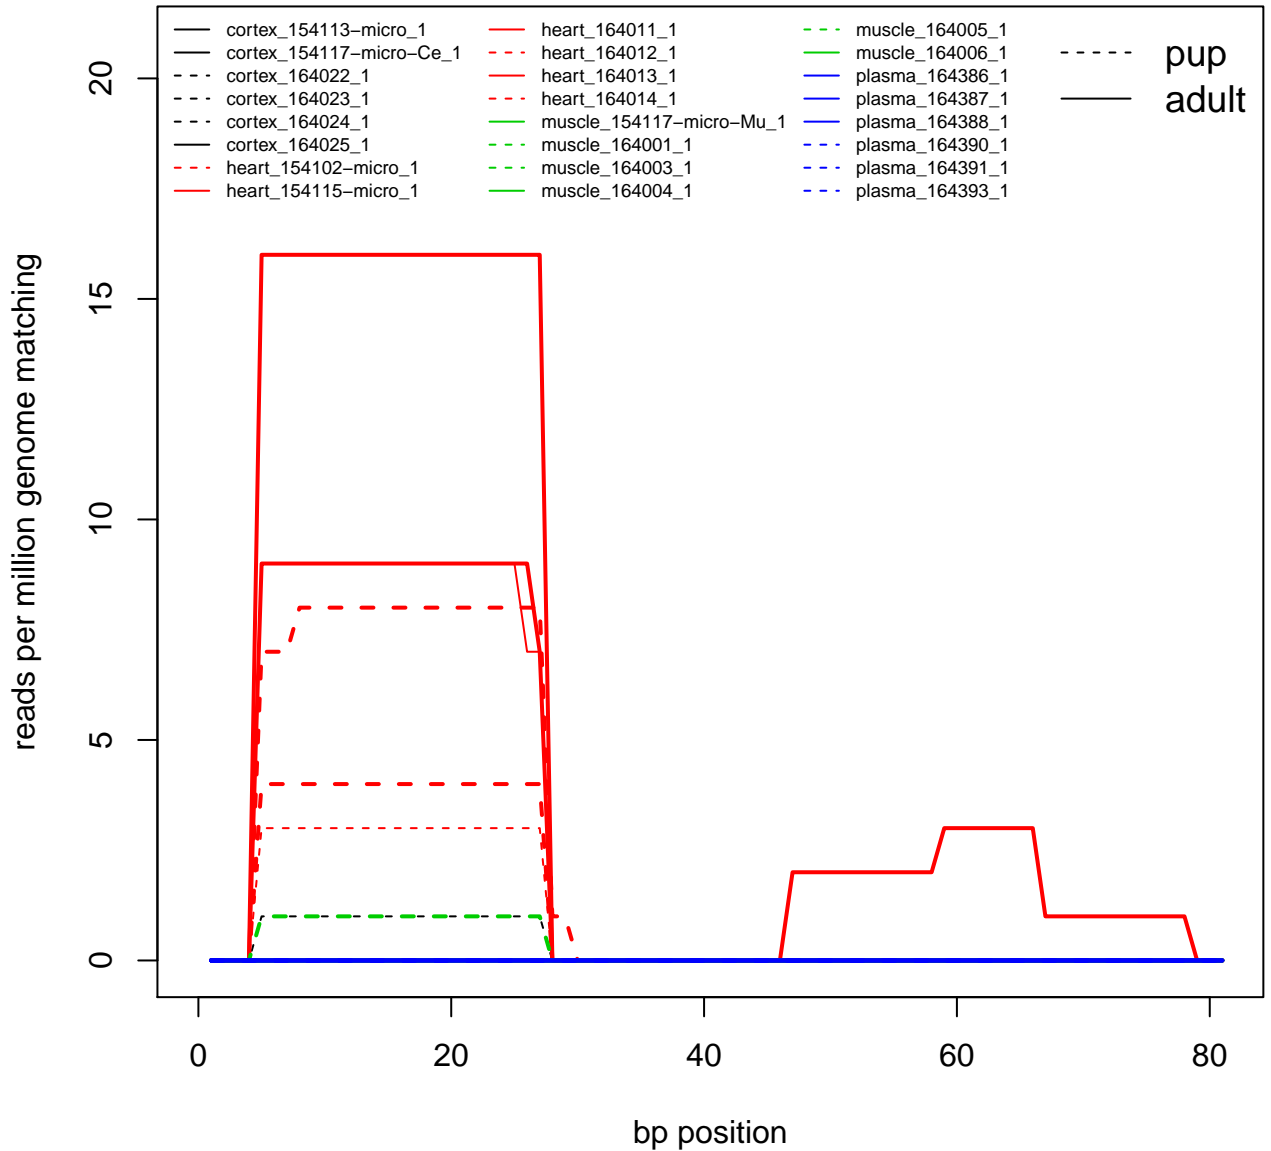

# novel\_141

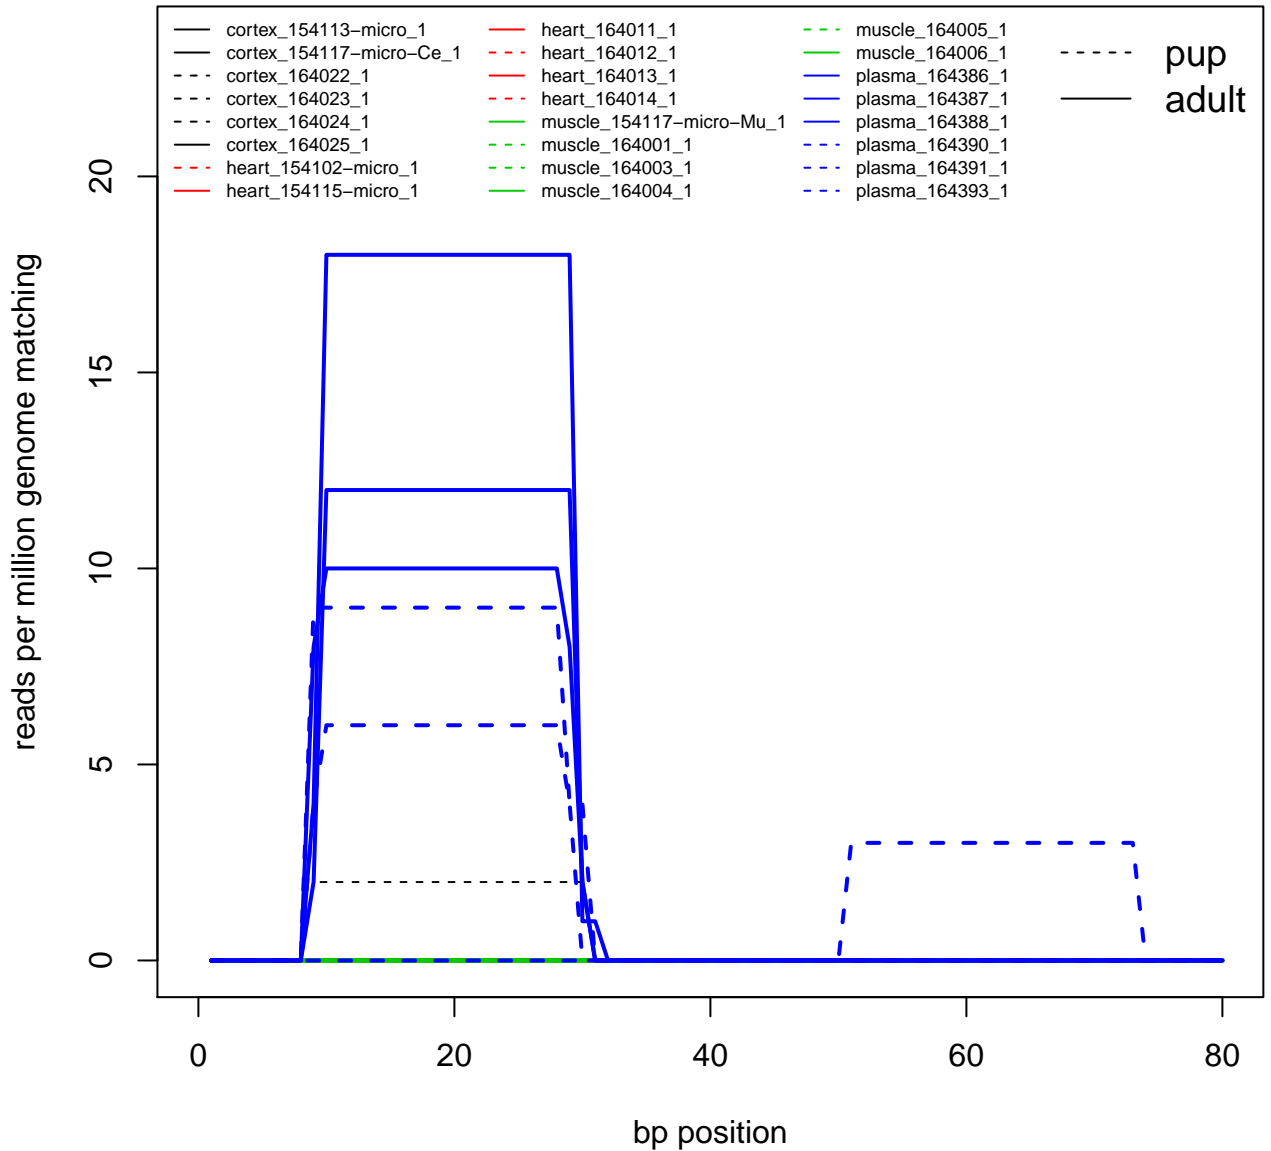

# novel\_142

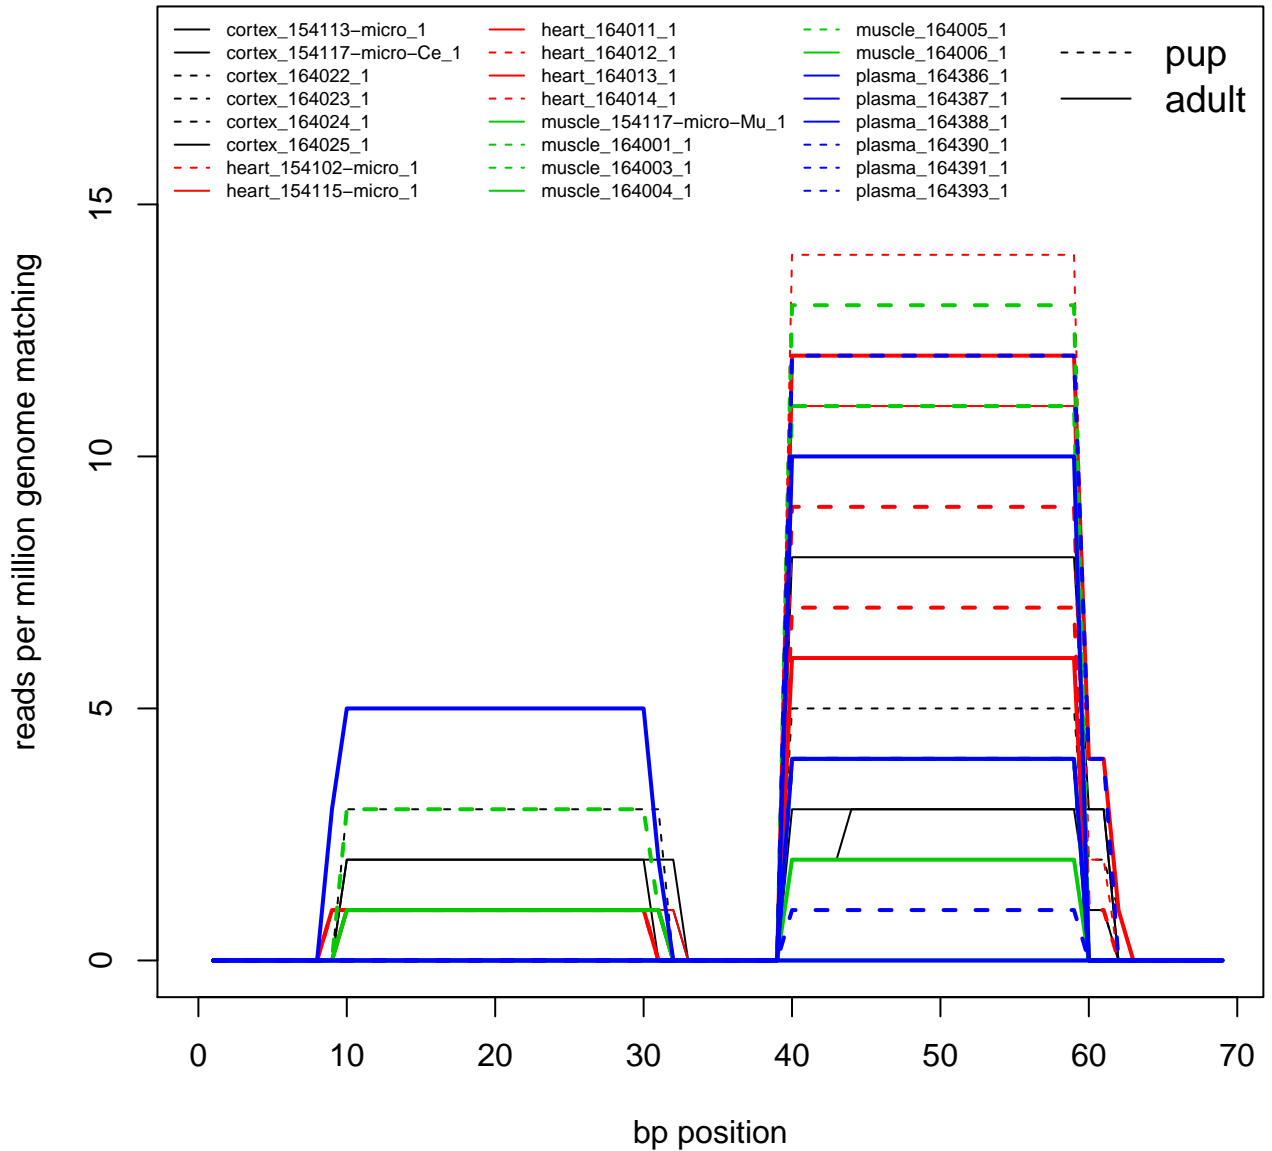







# lwe-miR-335\_loc1

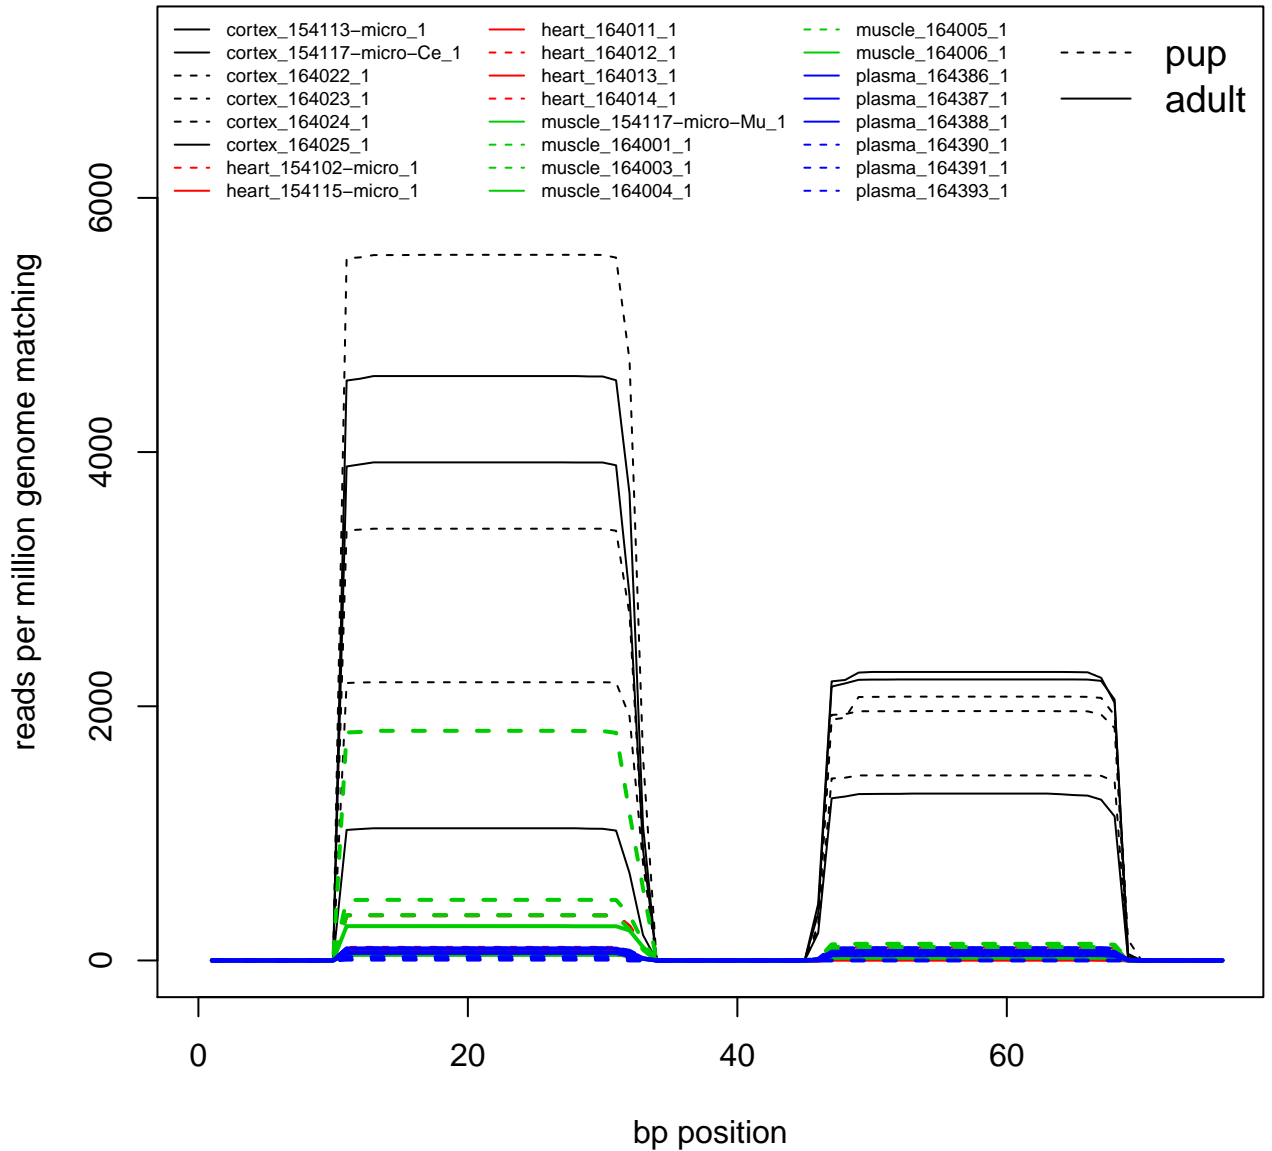

# lwe-miR-29c-1\_loc2



# novel\_145

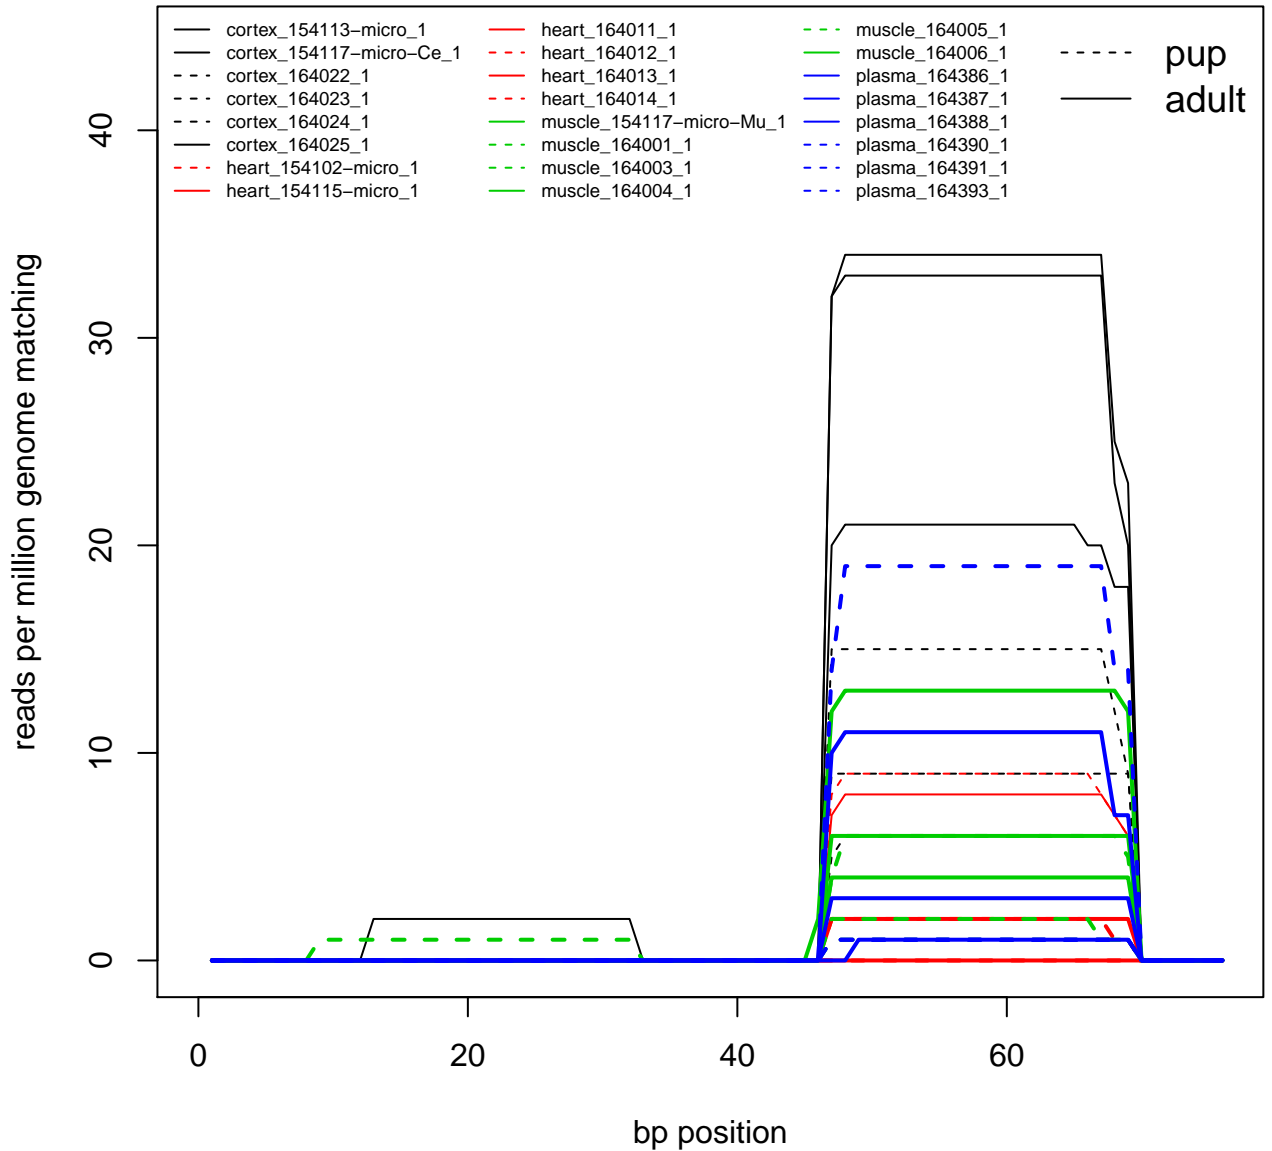

# lwe-miR-208b\_loc1

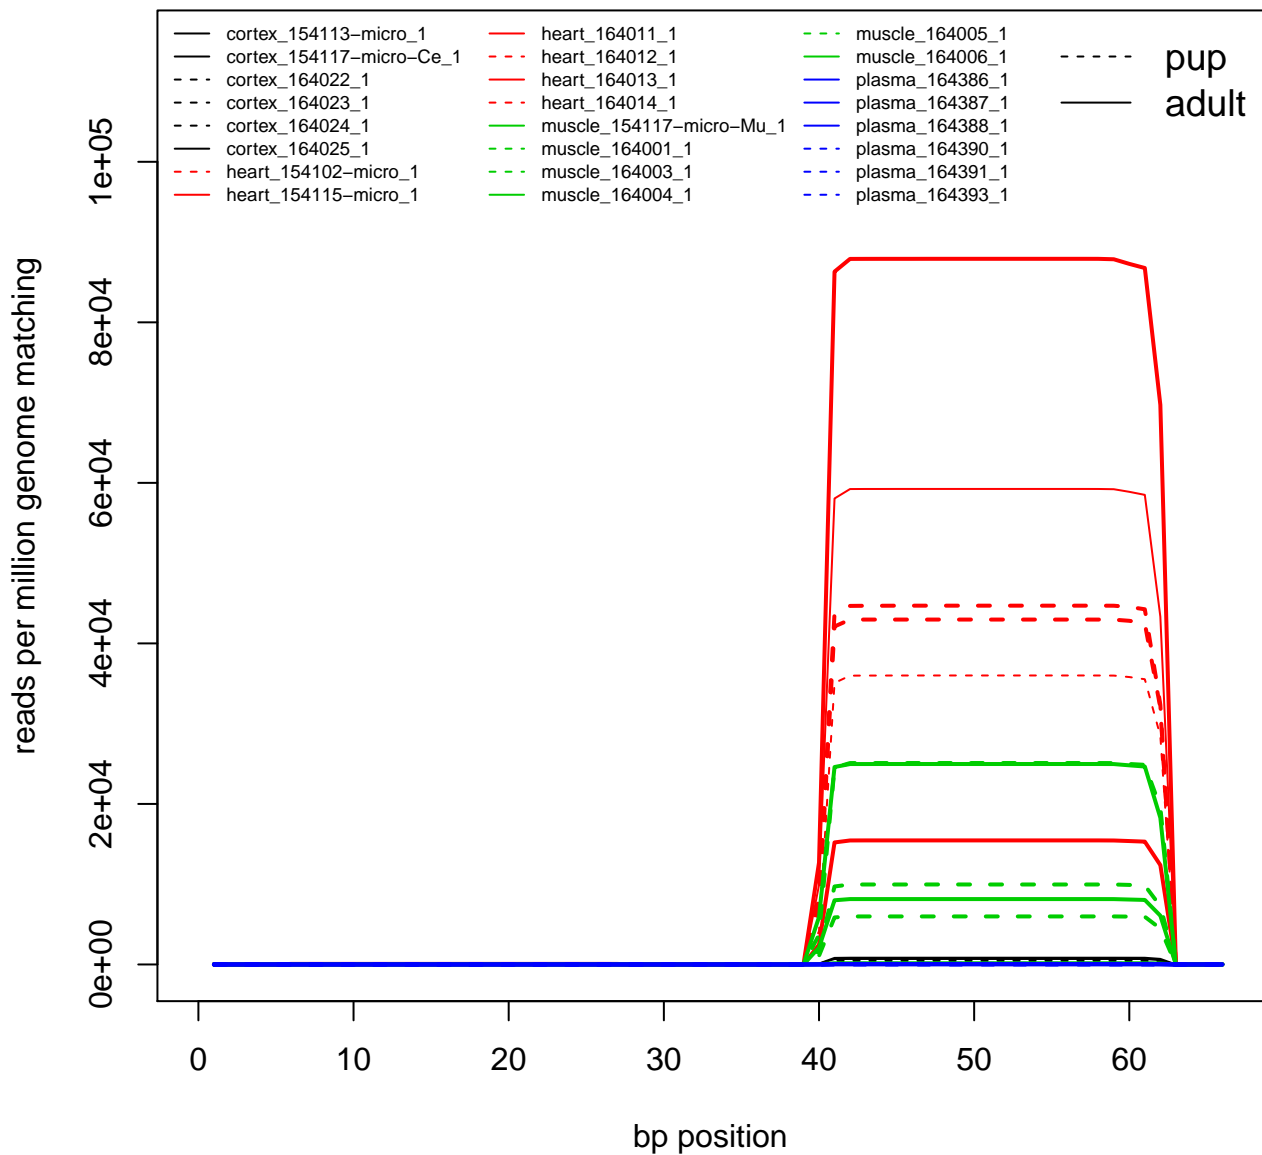

# lwe-miR-18a\_miRDeep2\_loc1

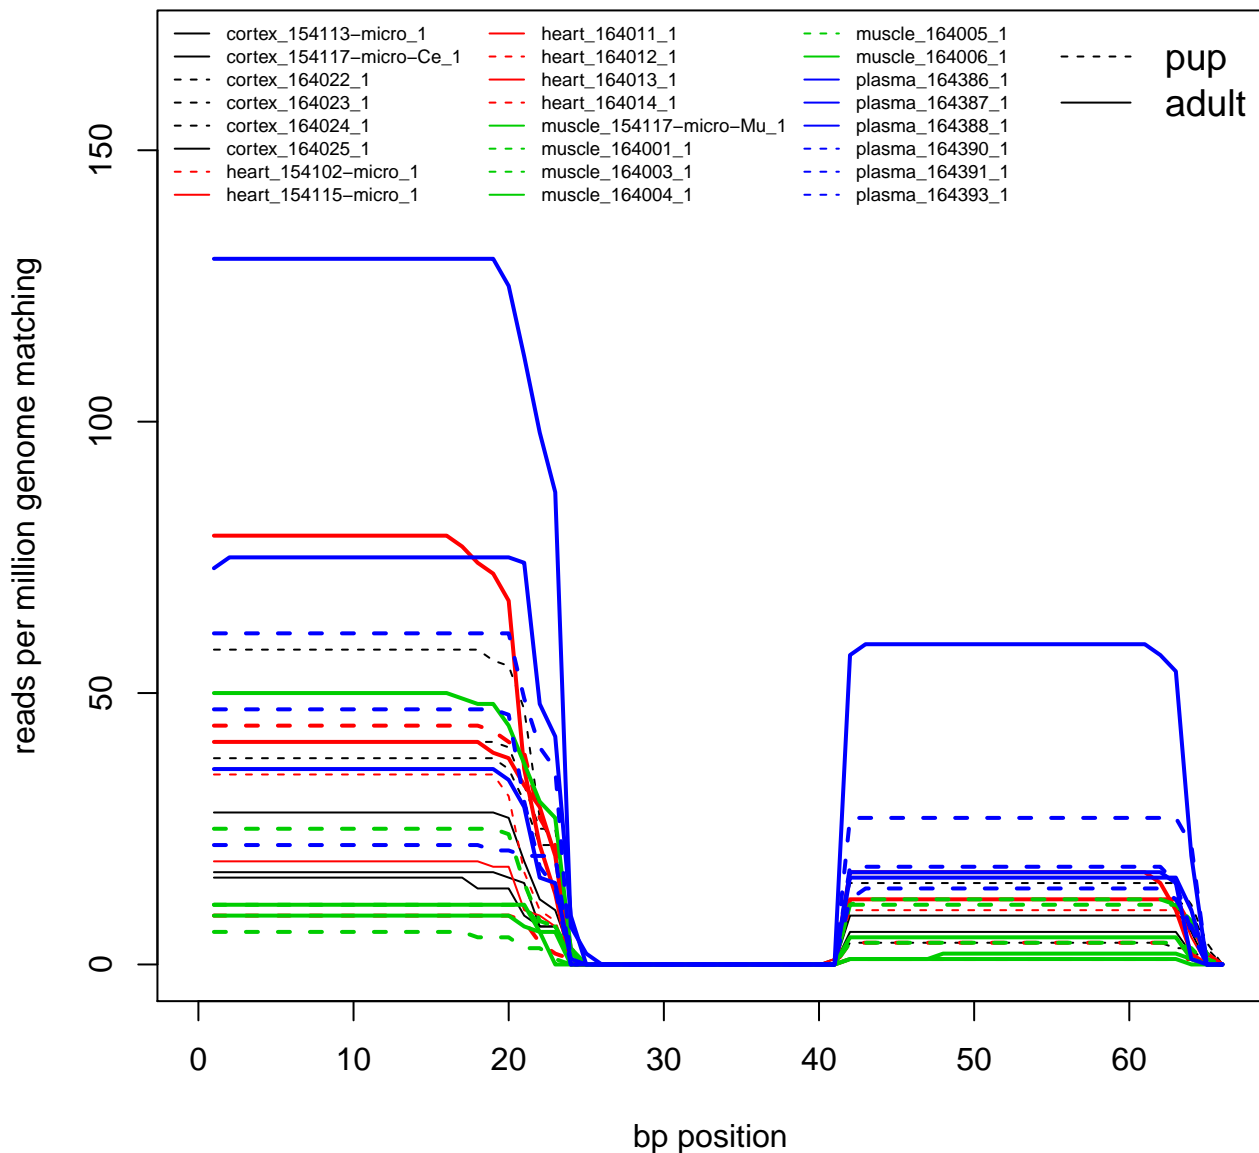

# WS\_miRDeep2\_novel\_1

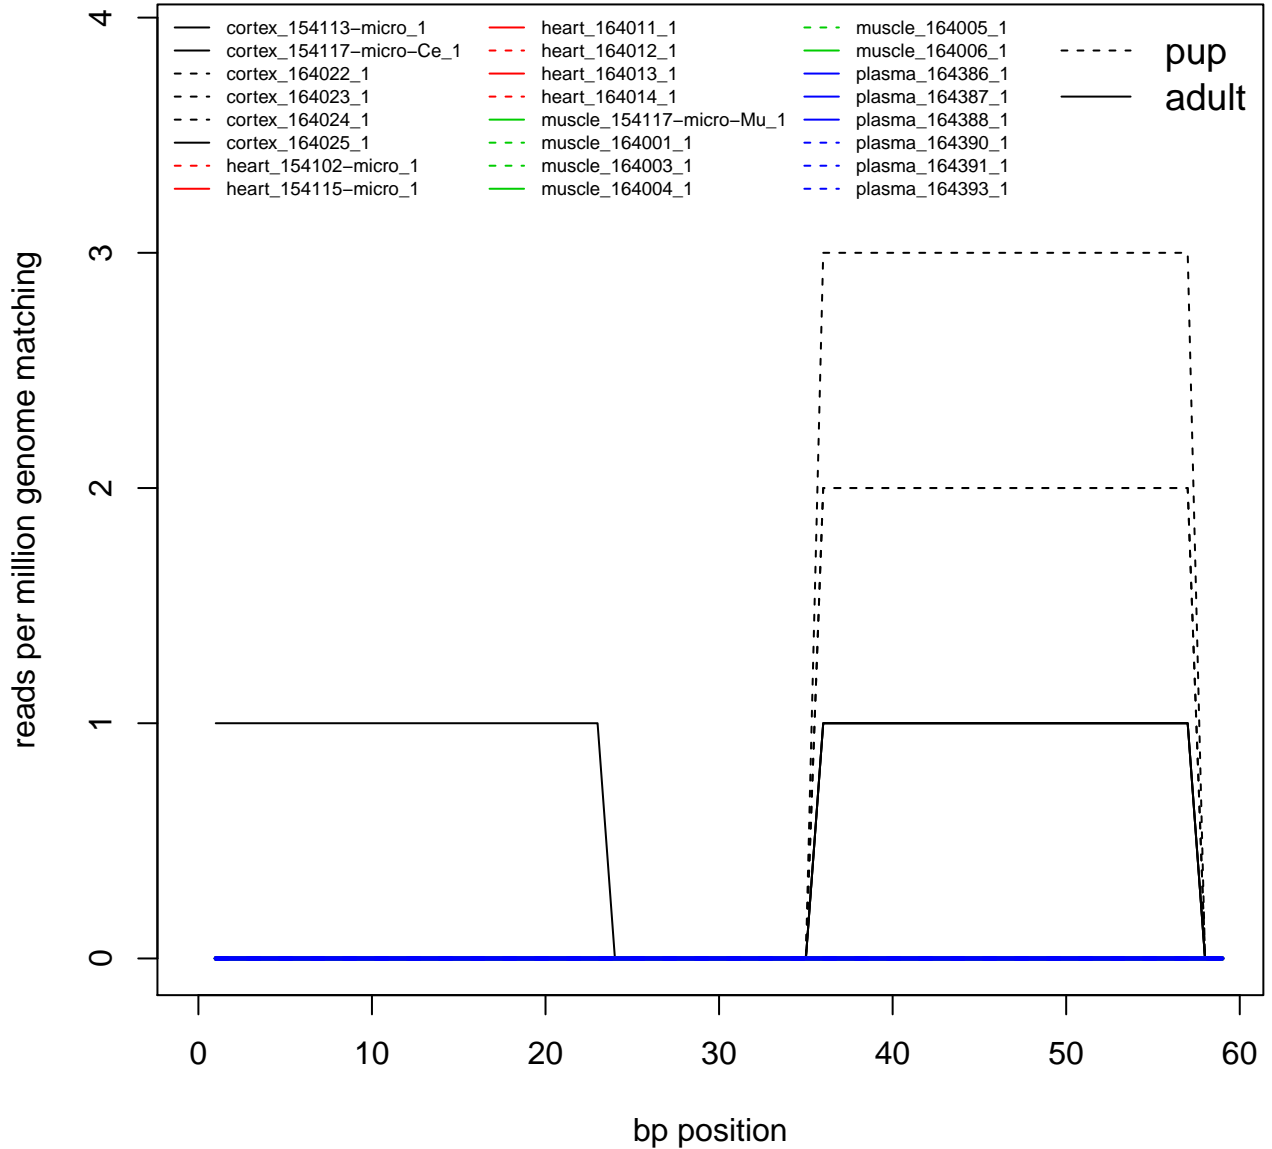

# WS\_miRDeep2\_novel\_2

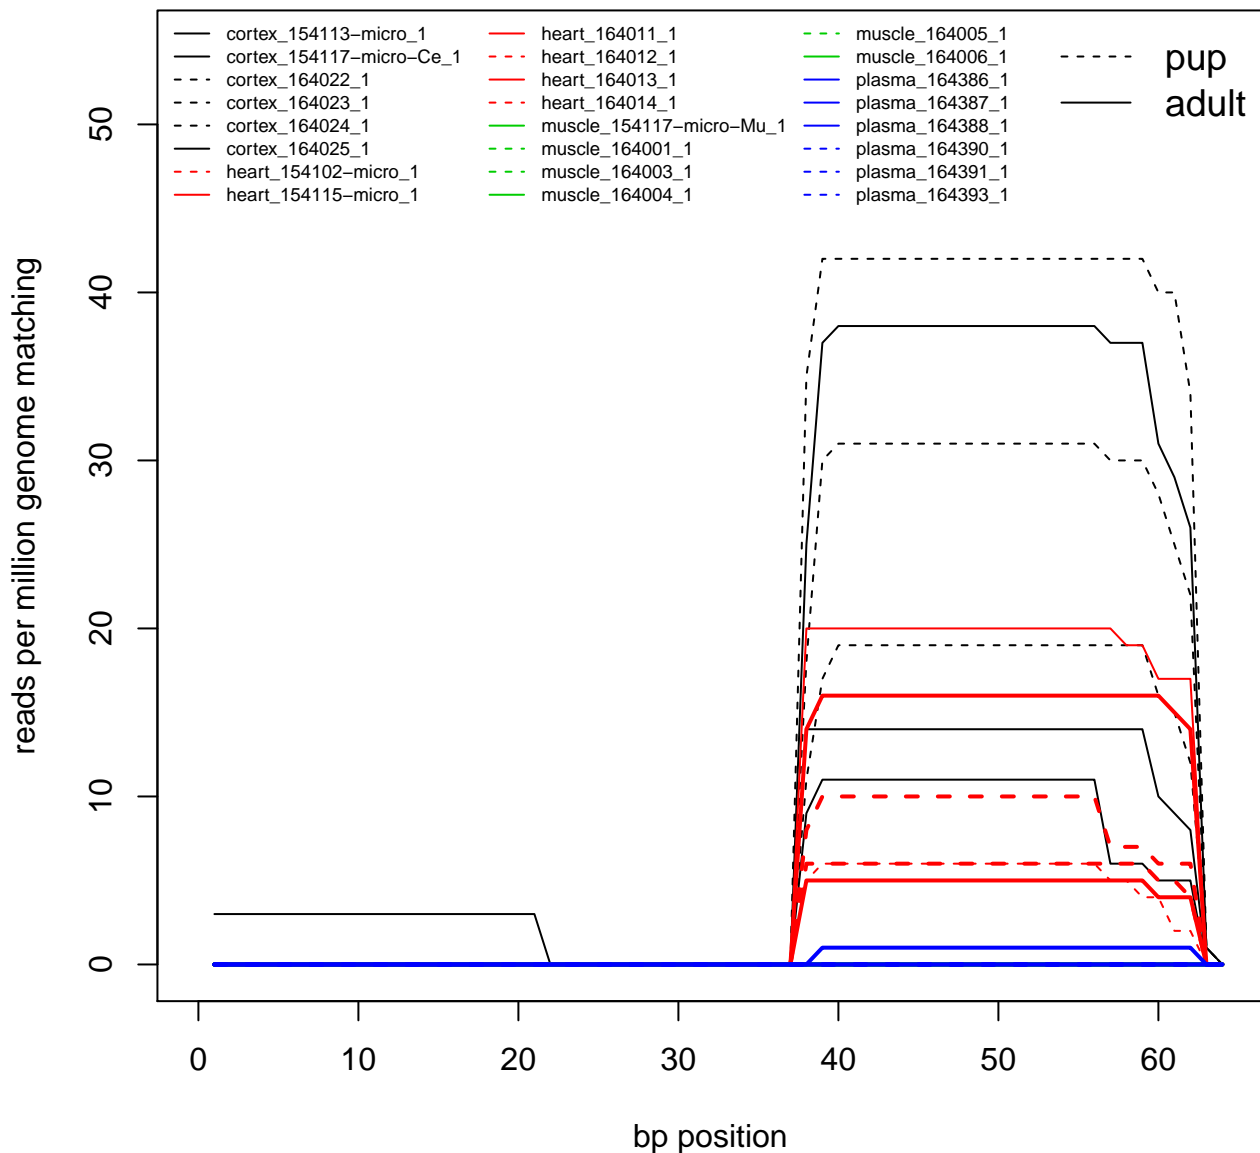

# WS\_miRDeep2\_novel\_3

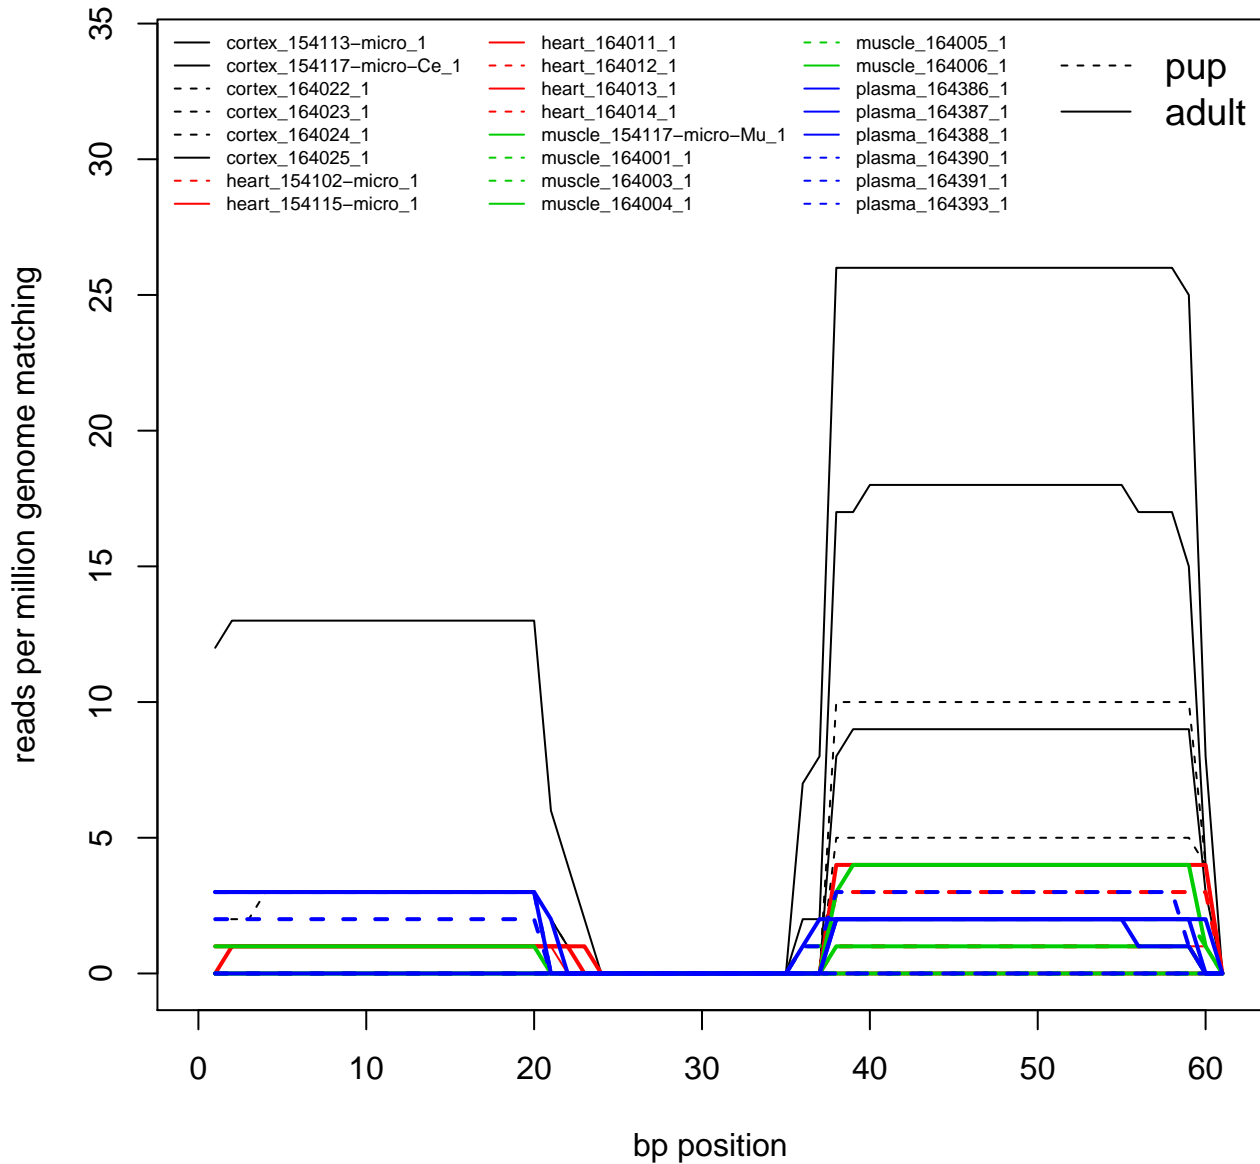



# WS\_miRDeep2\_novel\_4

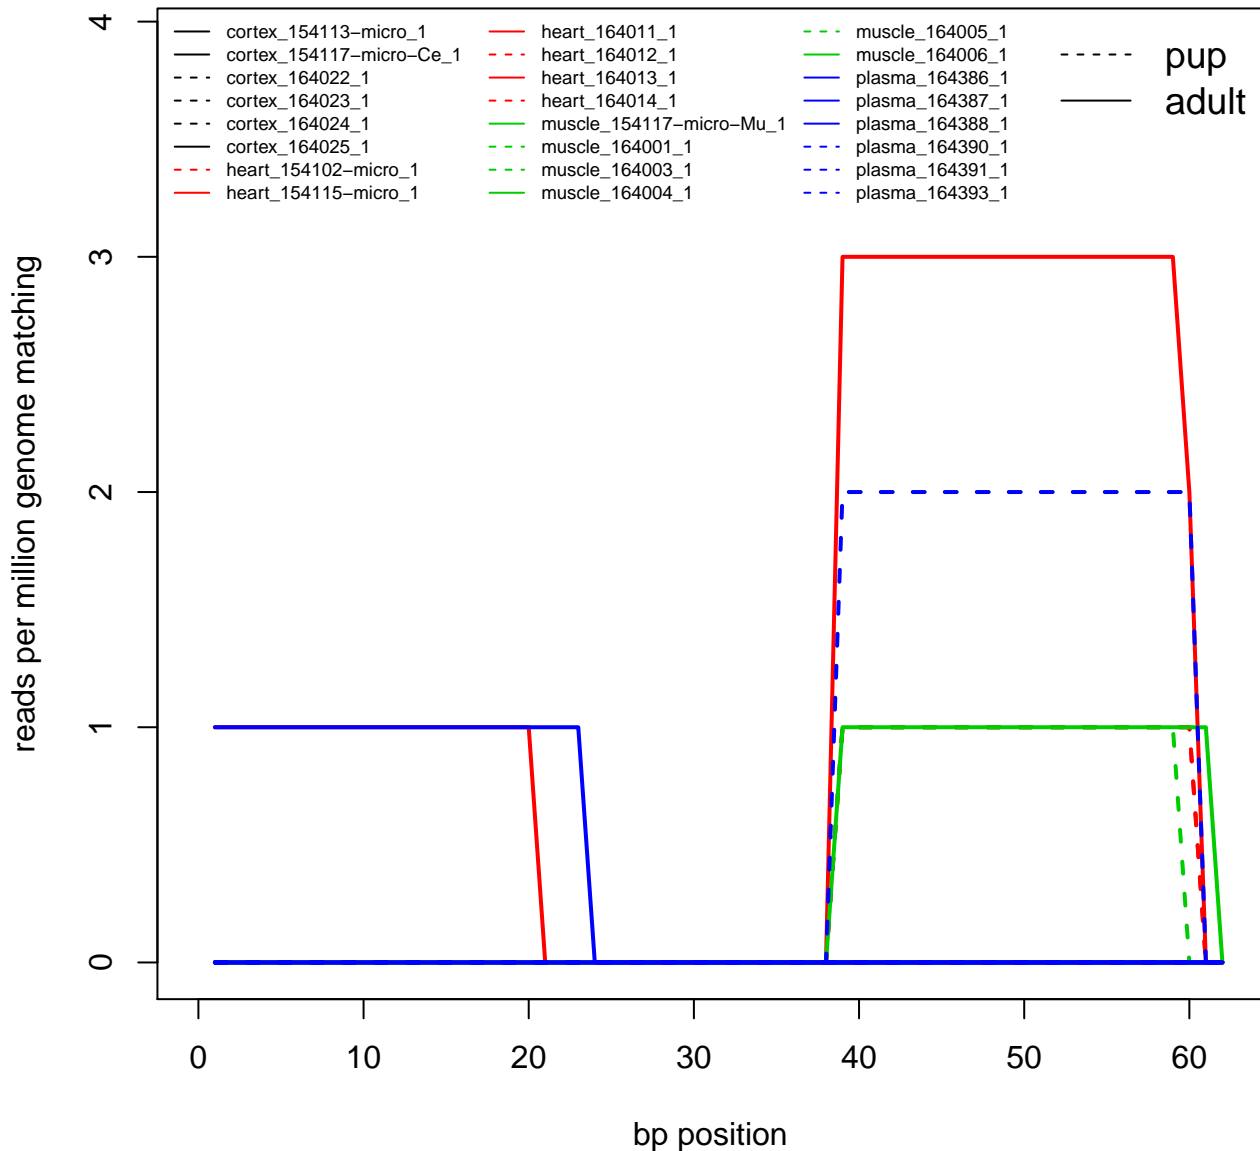



# WS\_miRDeep2\_novel\_6

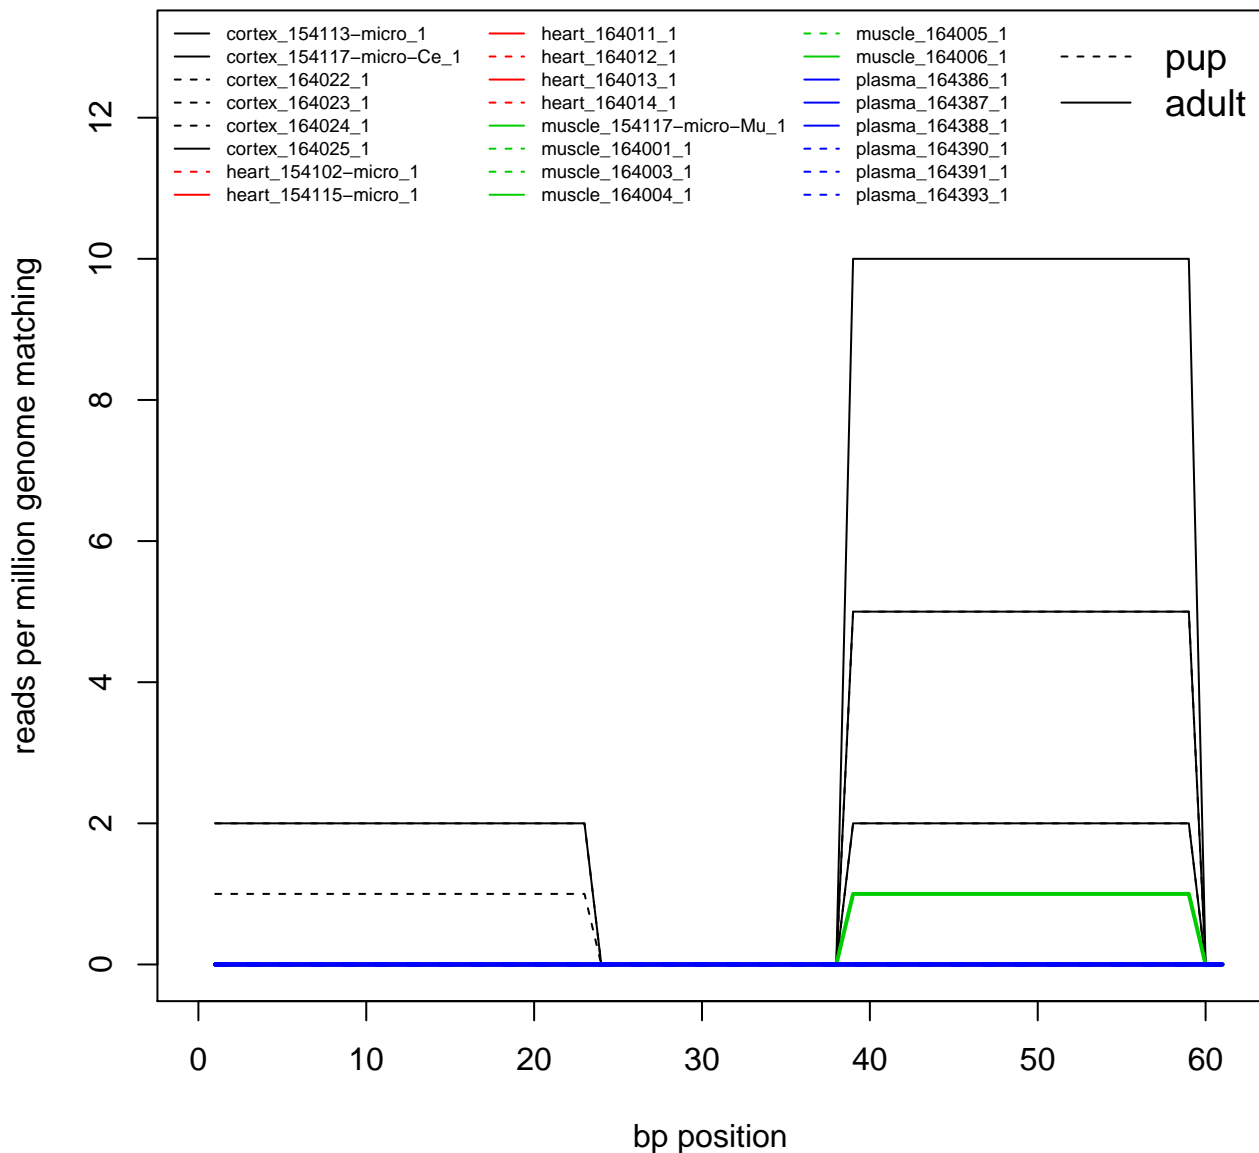



# lwe-miR-615\_loc1

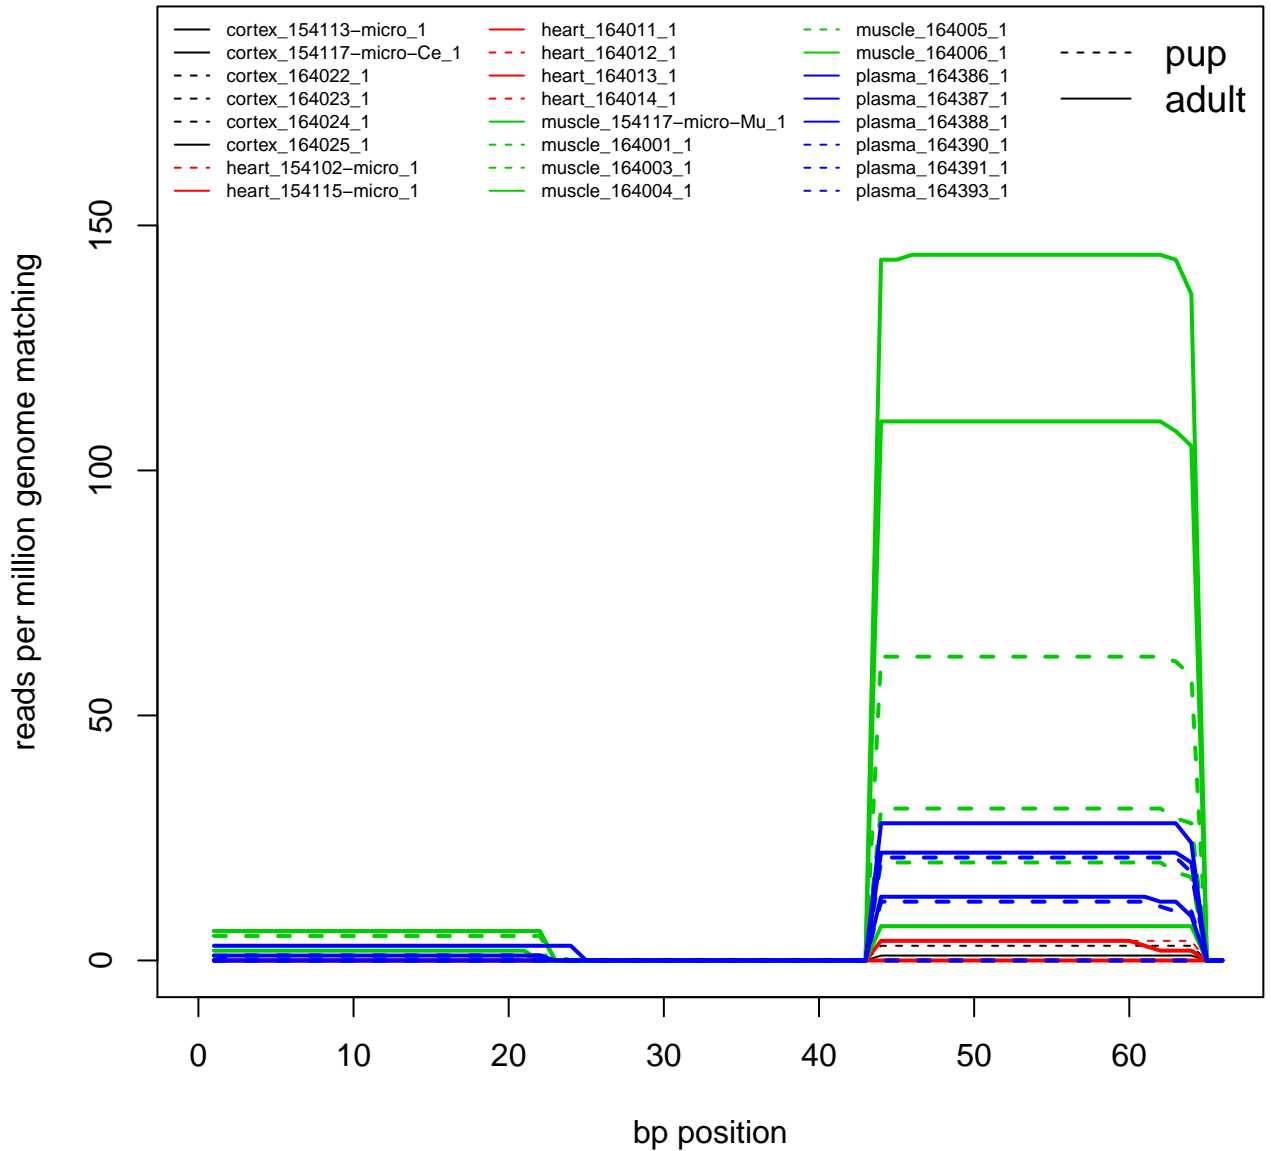



# lwe-miR-129\_loc1

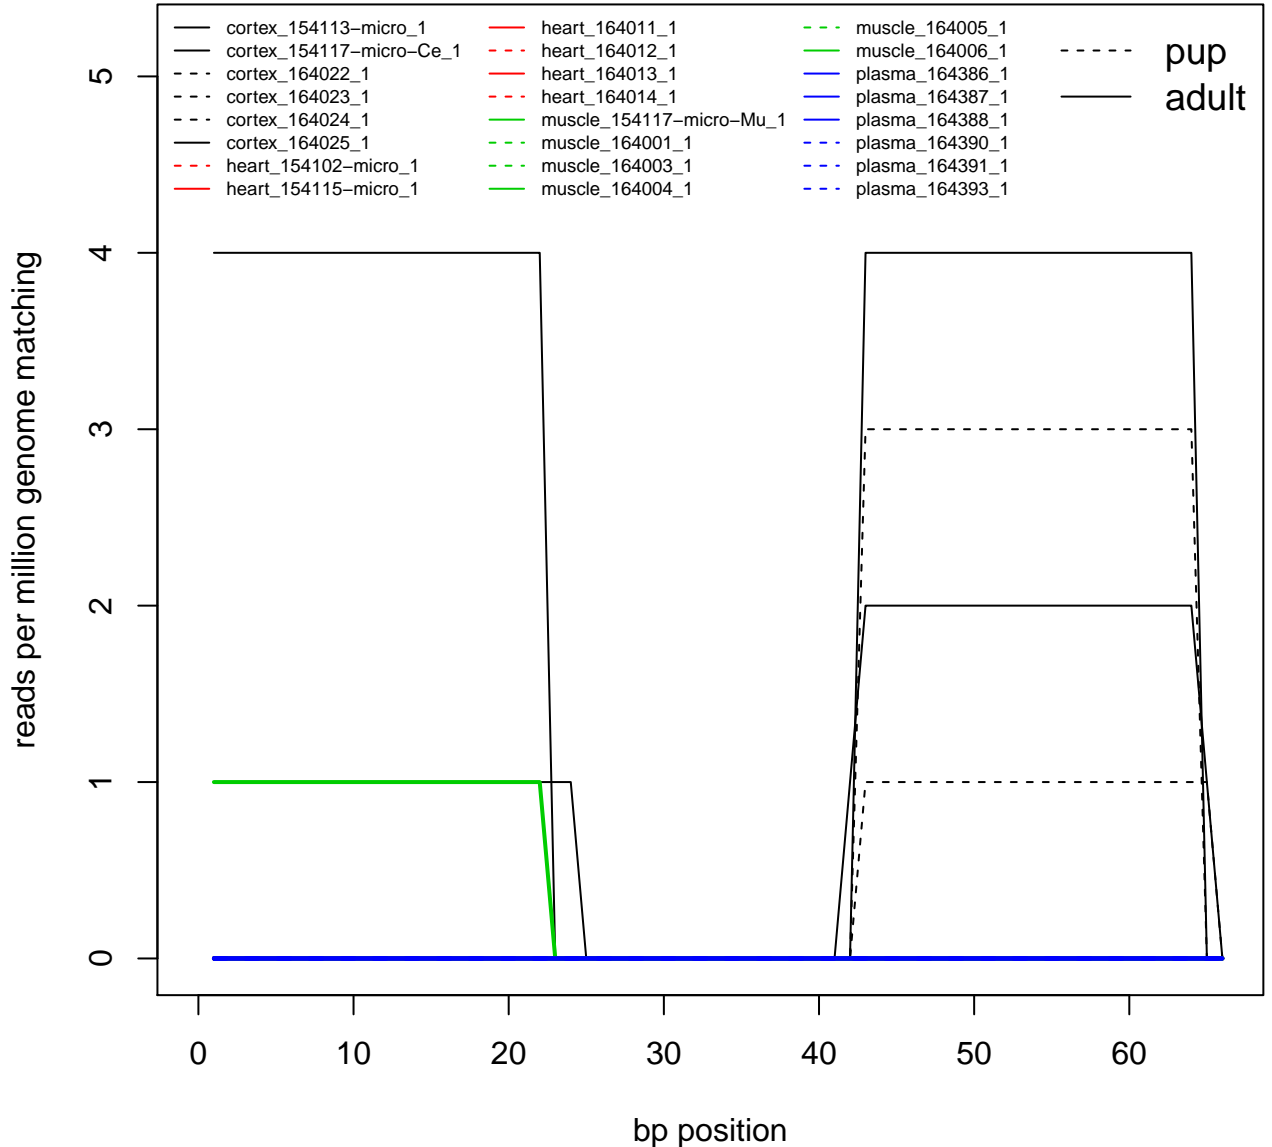

# WS\_miRDeep2\_novel\_10

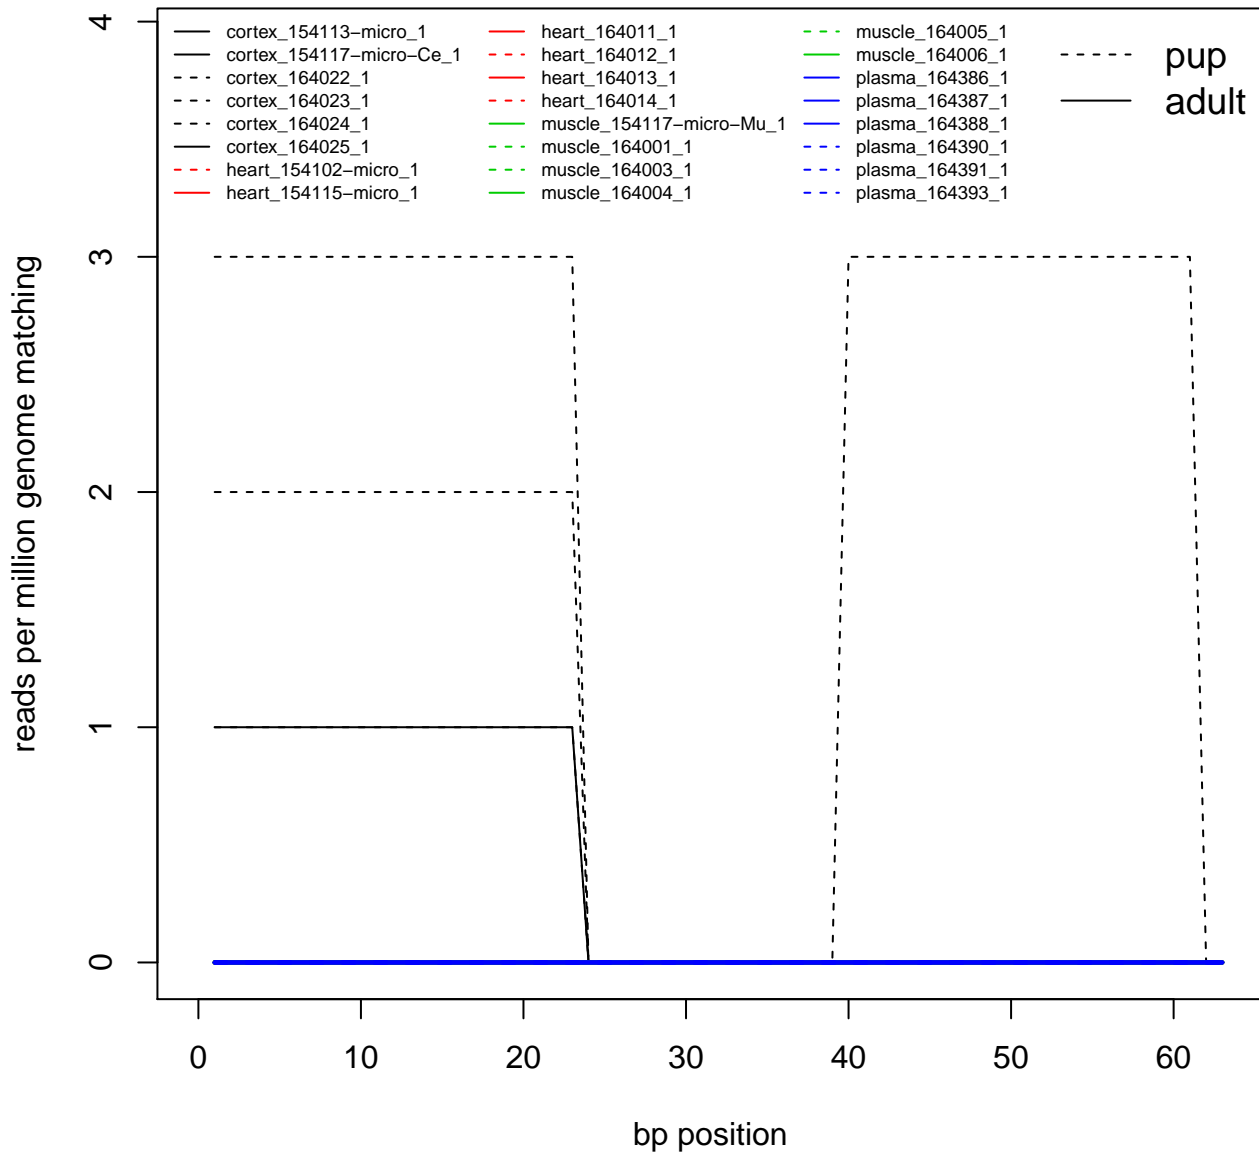



# WS\_miRDeep2\_novel\_11

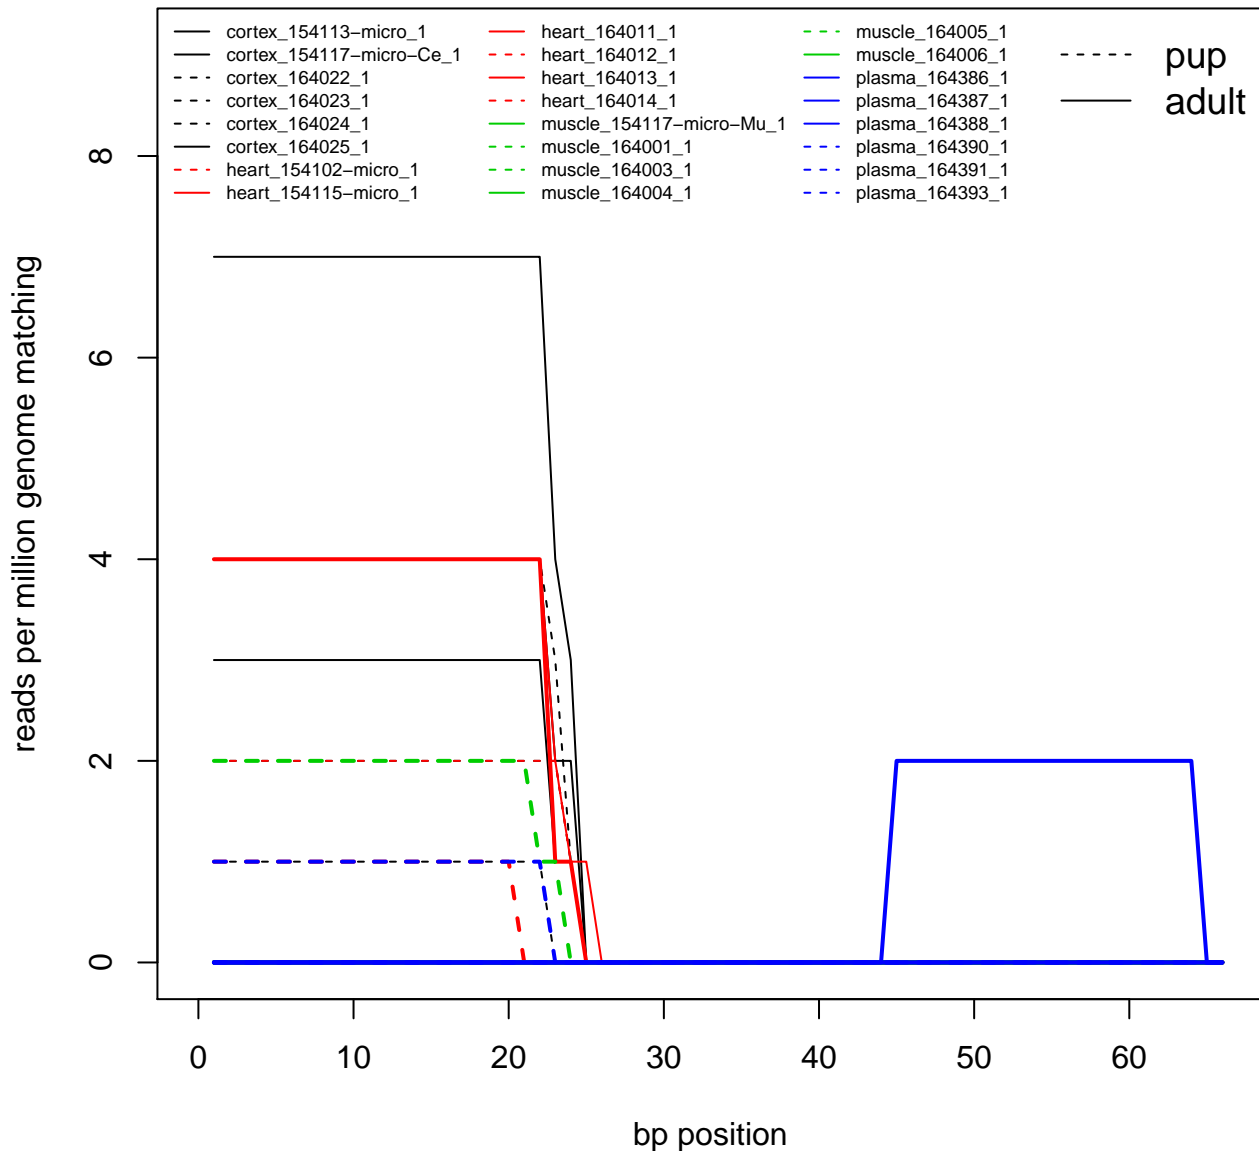

# WS\_miRDeep2\_novel\_12

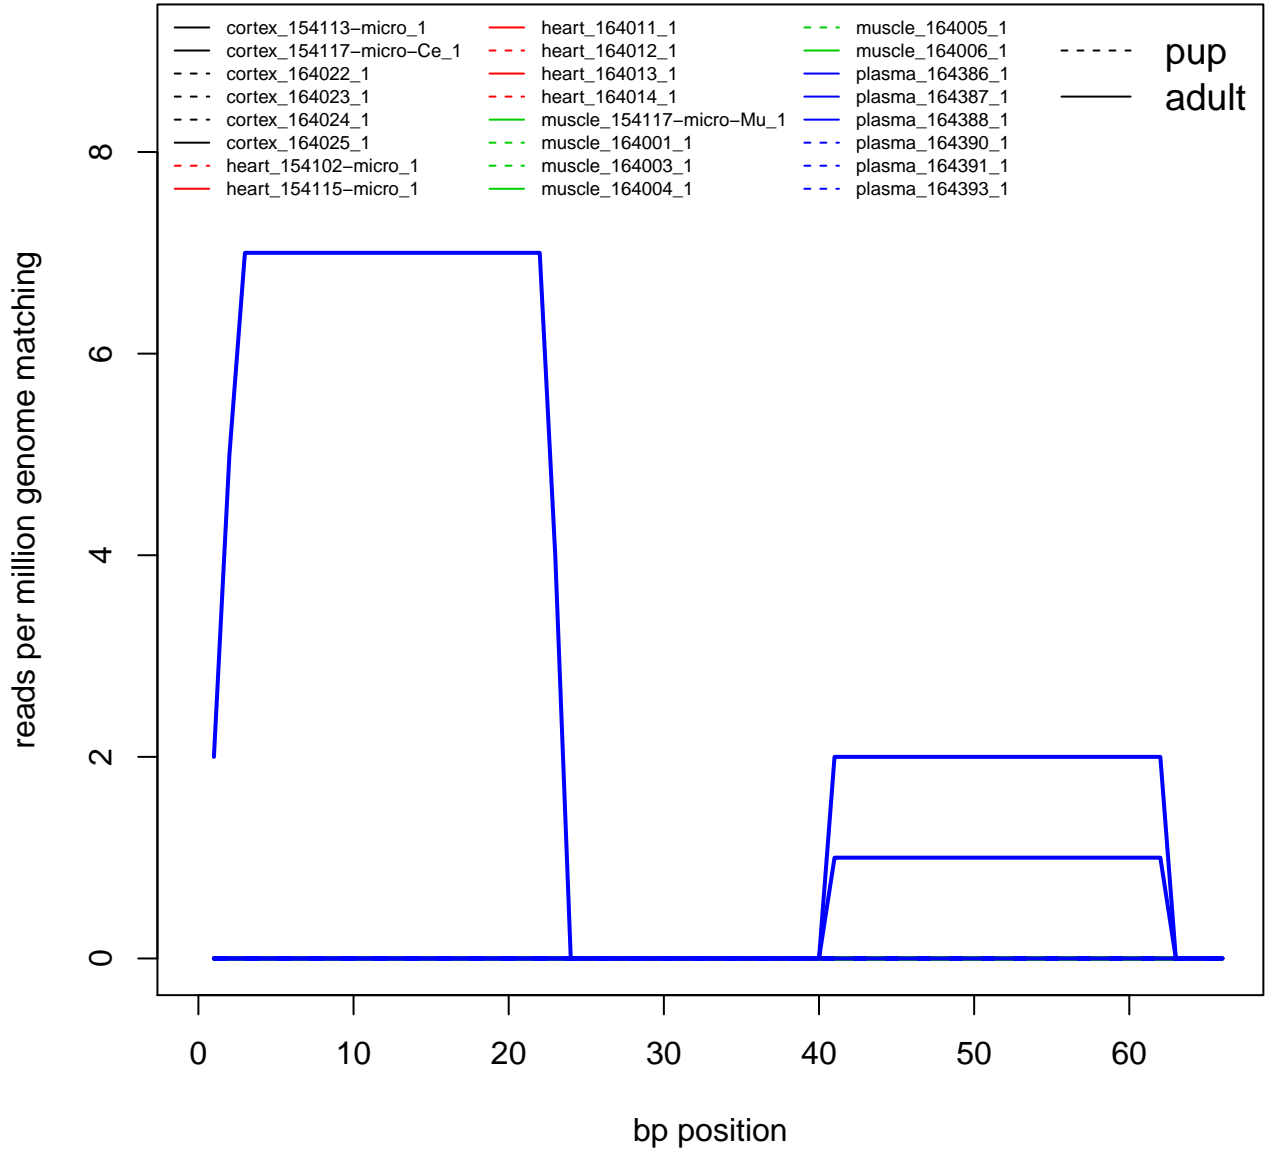

# lwe-miR-182\_miRDeep2\_loc1

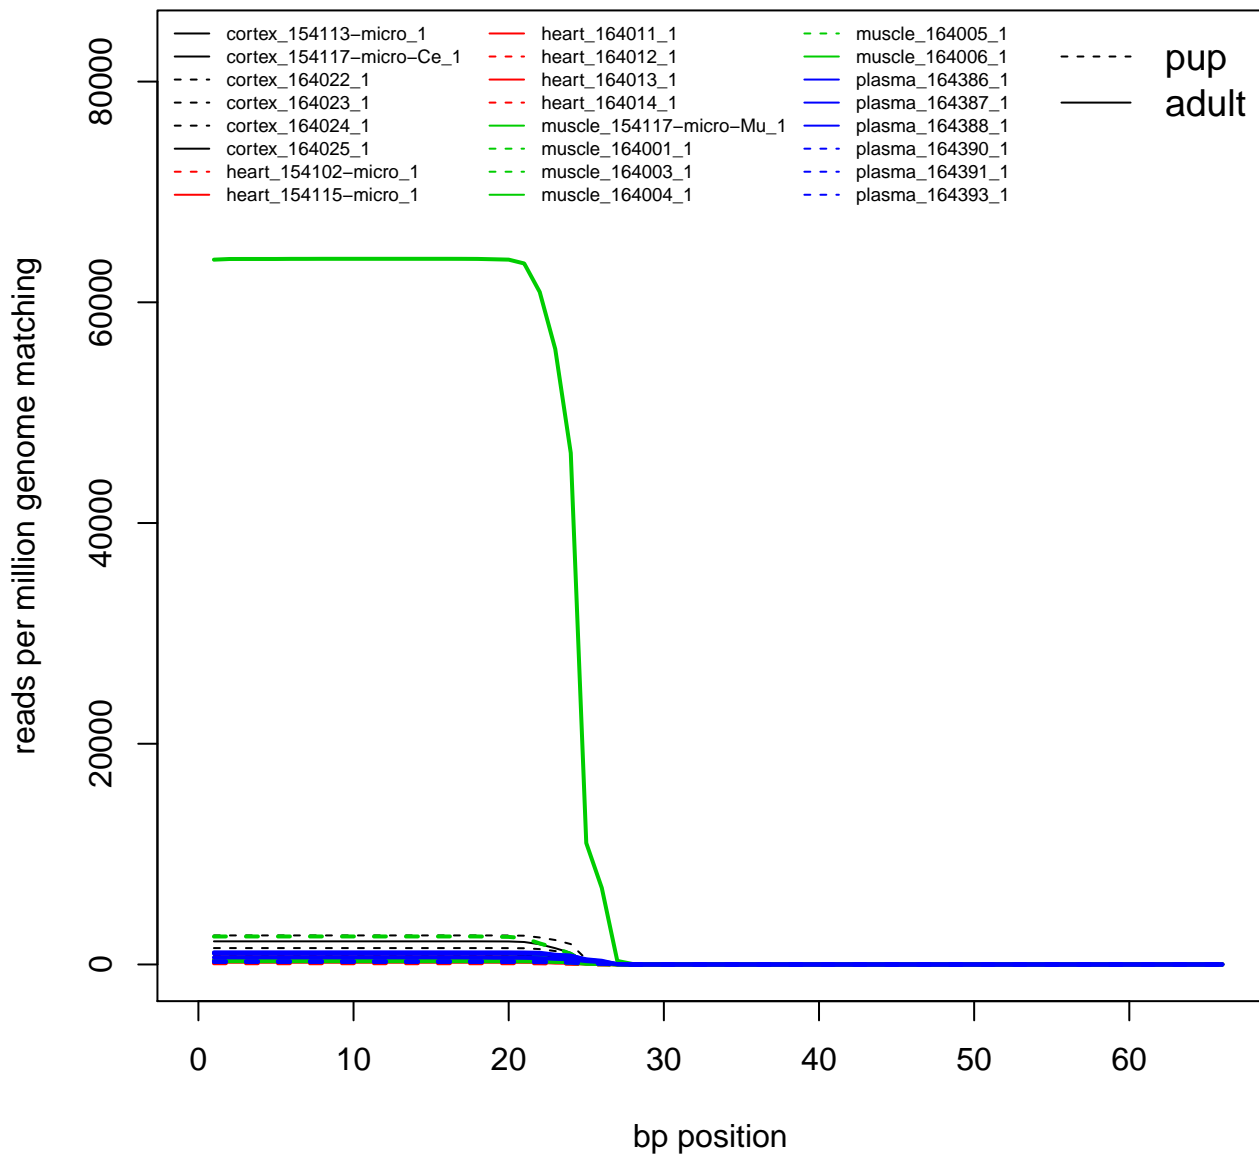

# WS\_miRDeep2\_novel\_13

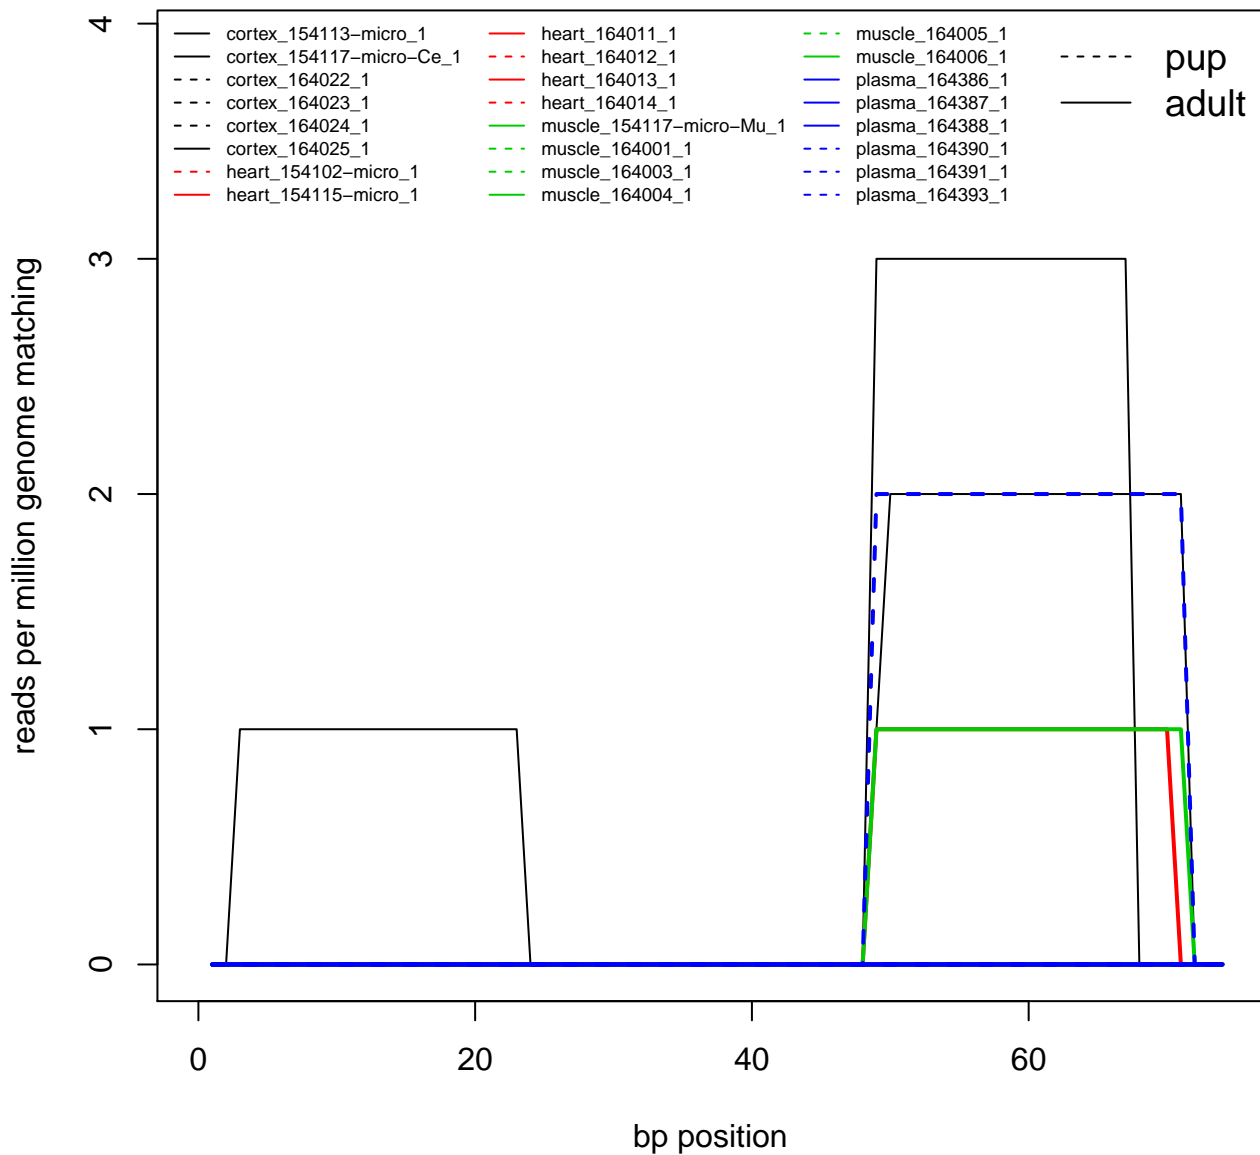

# WS\_miRDeep2\_novel\_14

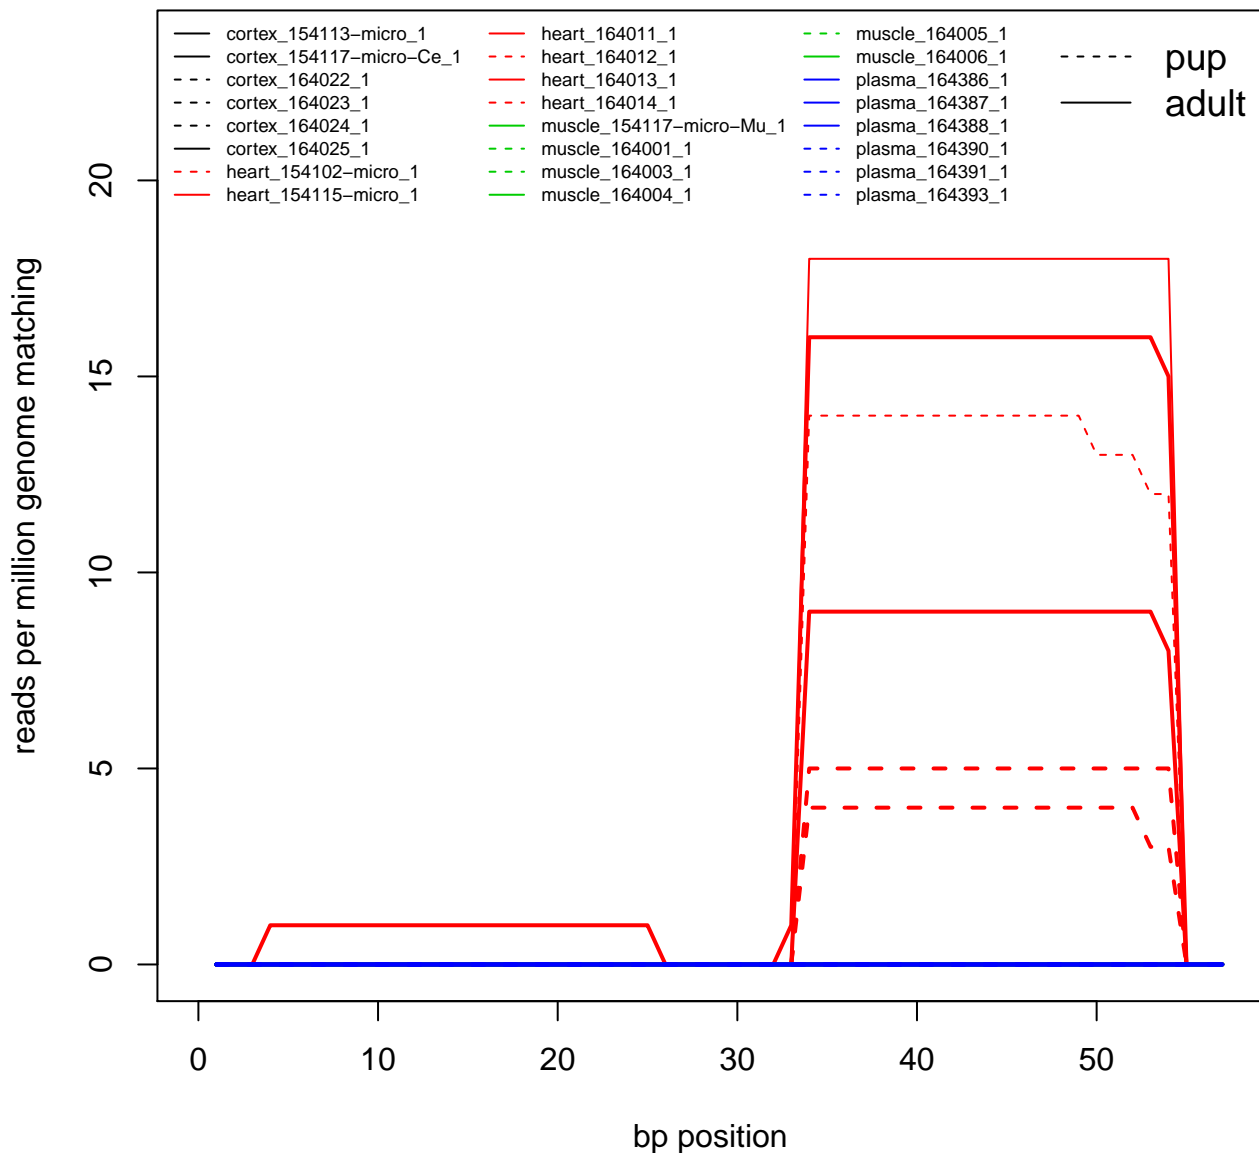

# WS\_miRDeep2\_novel\_15

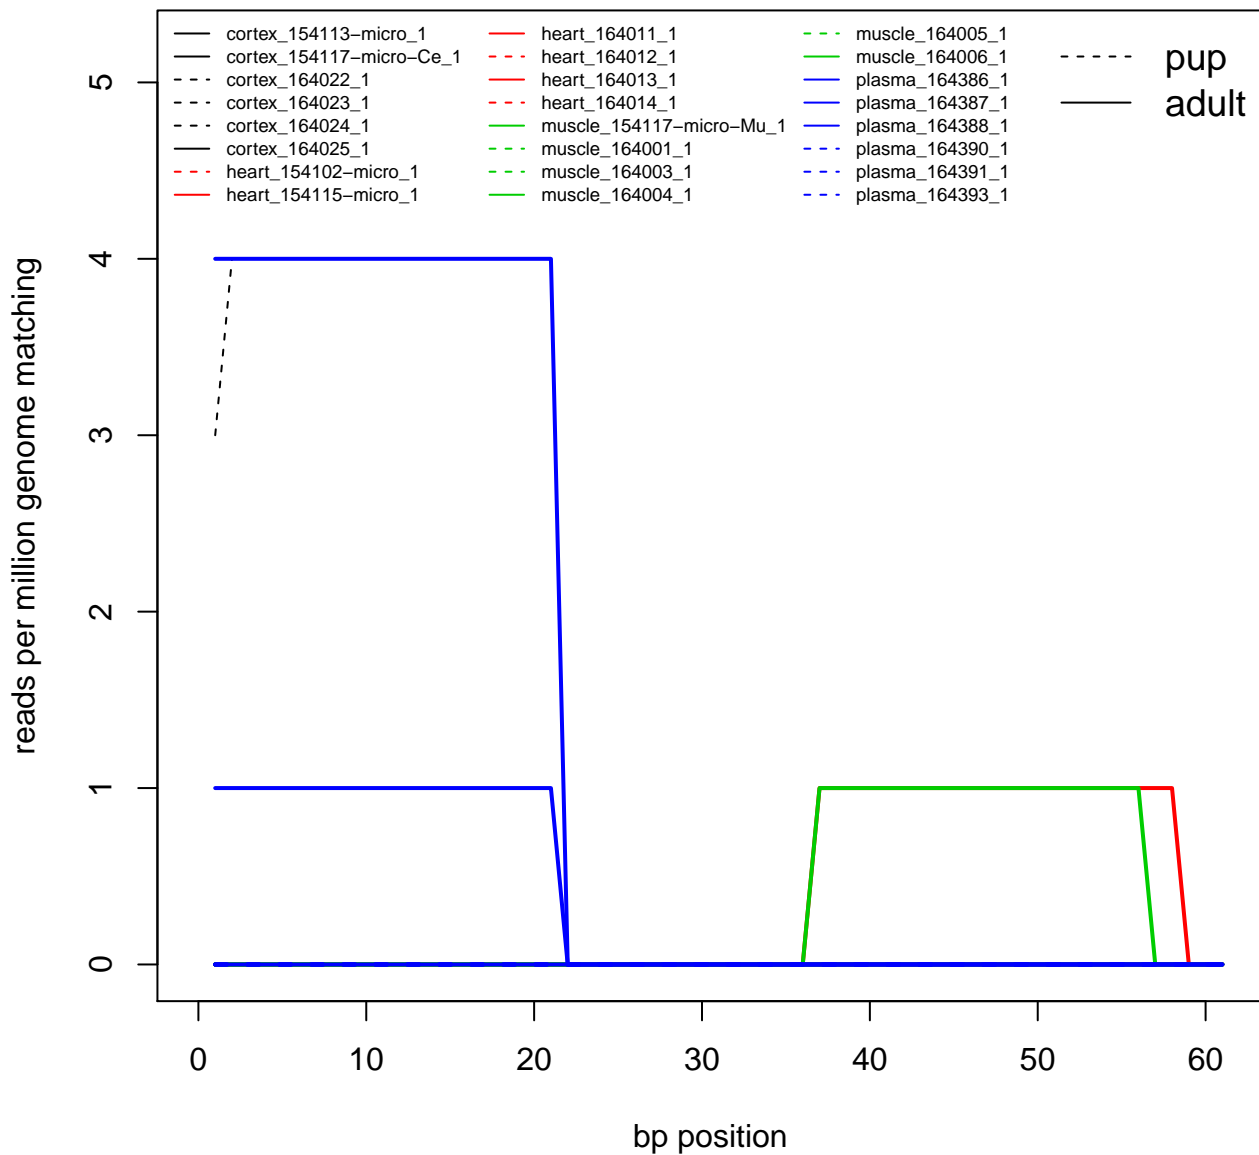

# WS\_miRDeep2\_novel\_16

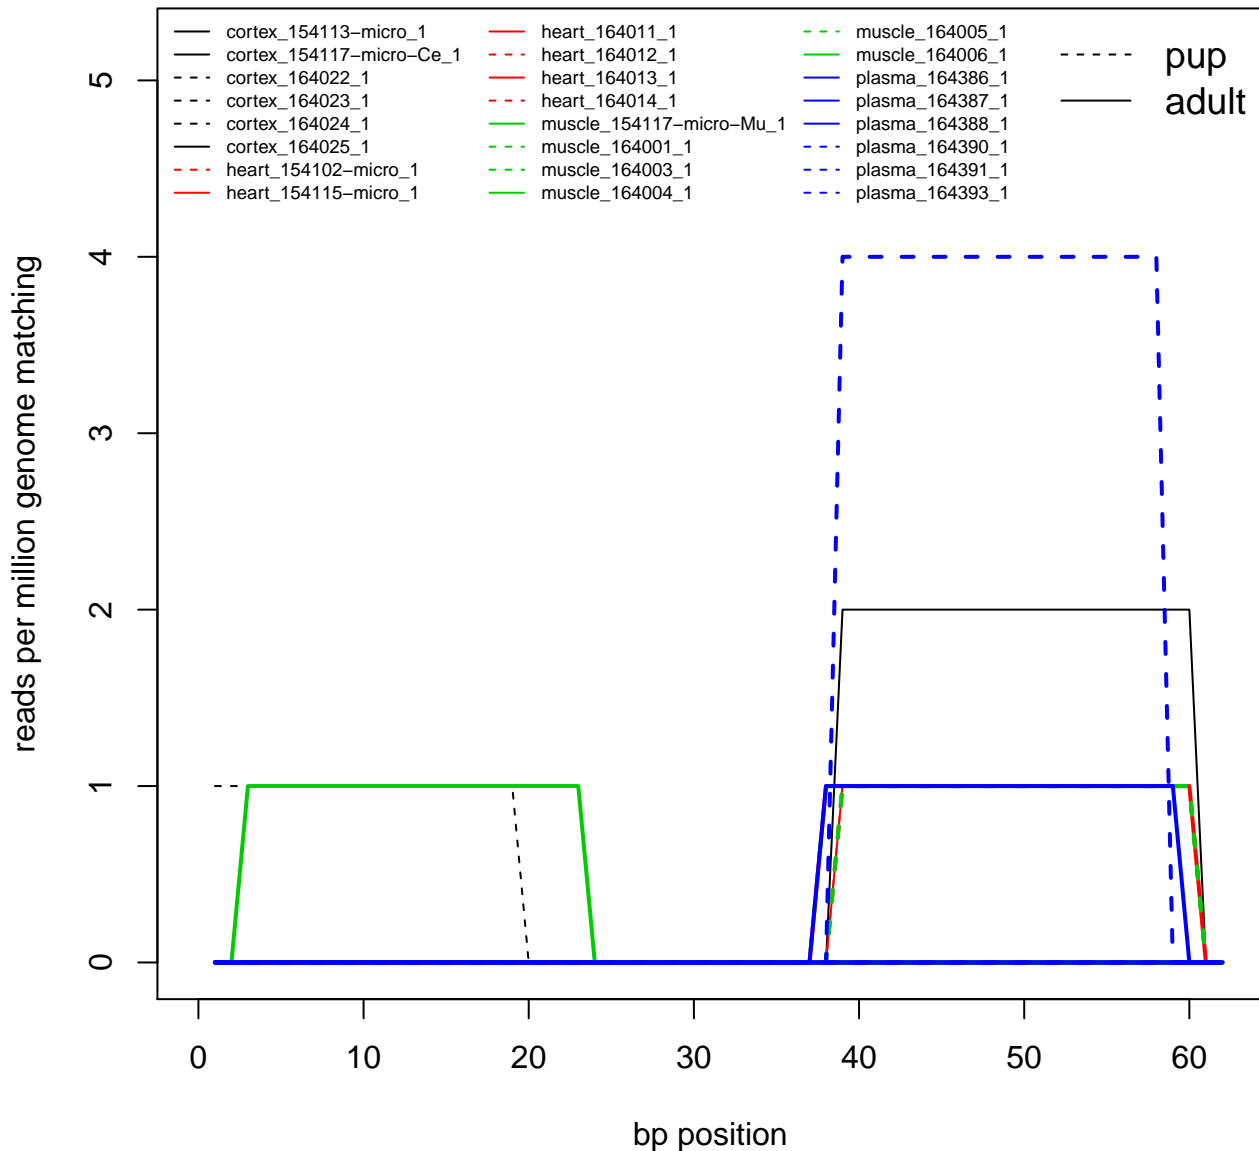

# WS\_miRDeep2\_novel\_17

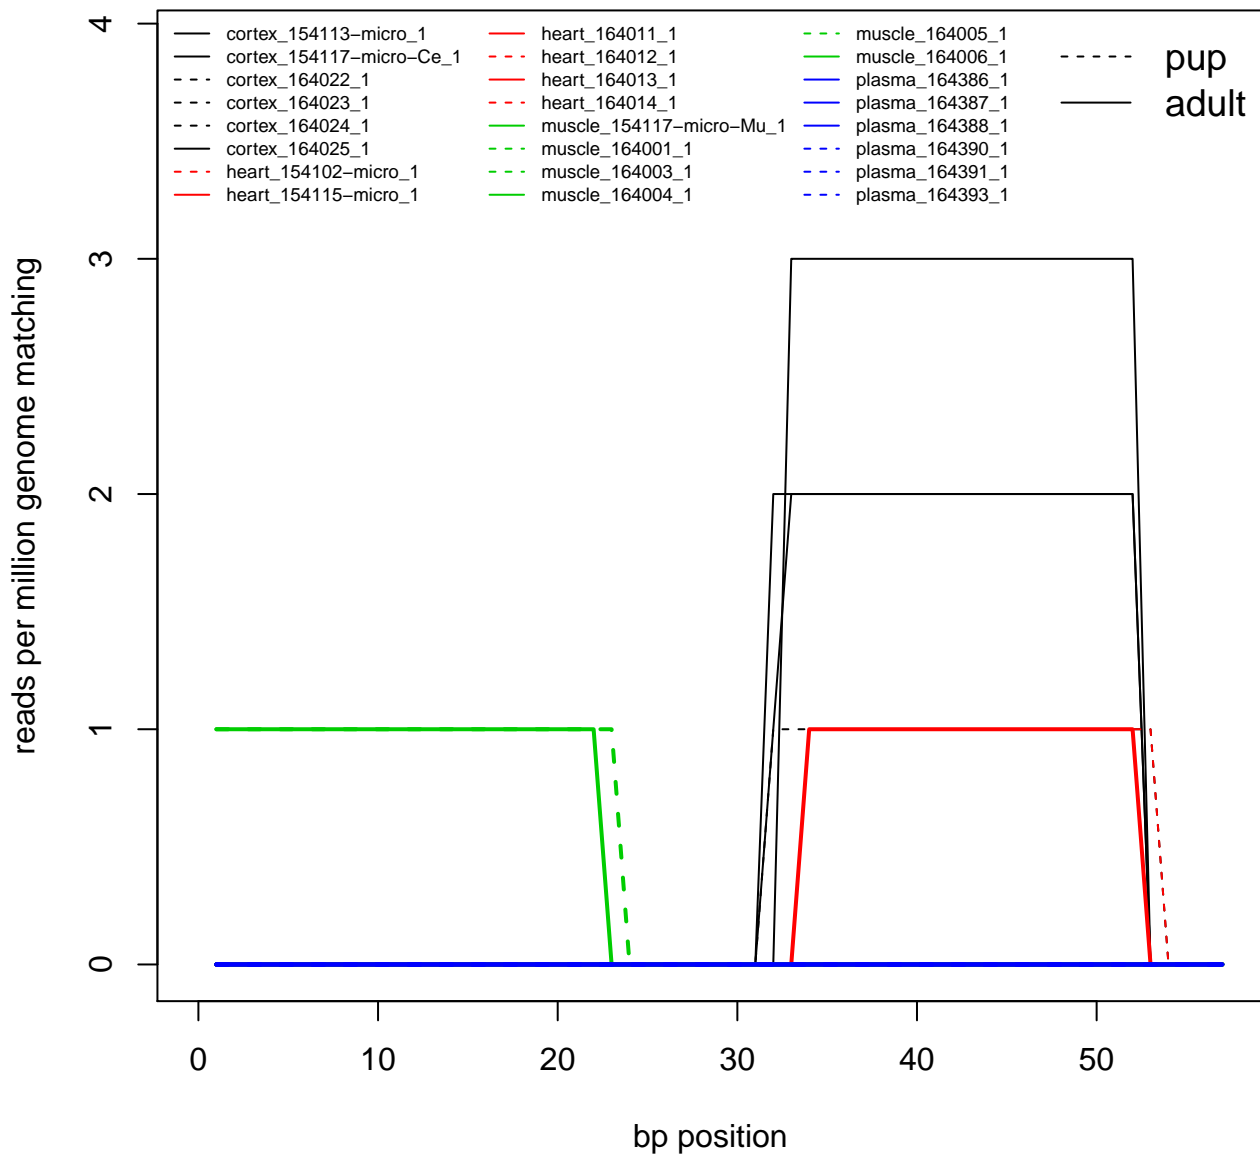



# WS\_miRDeep2\_novel\_18

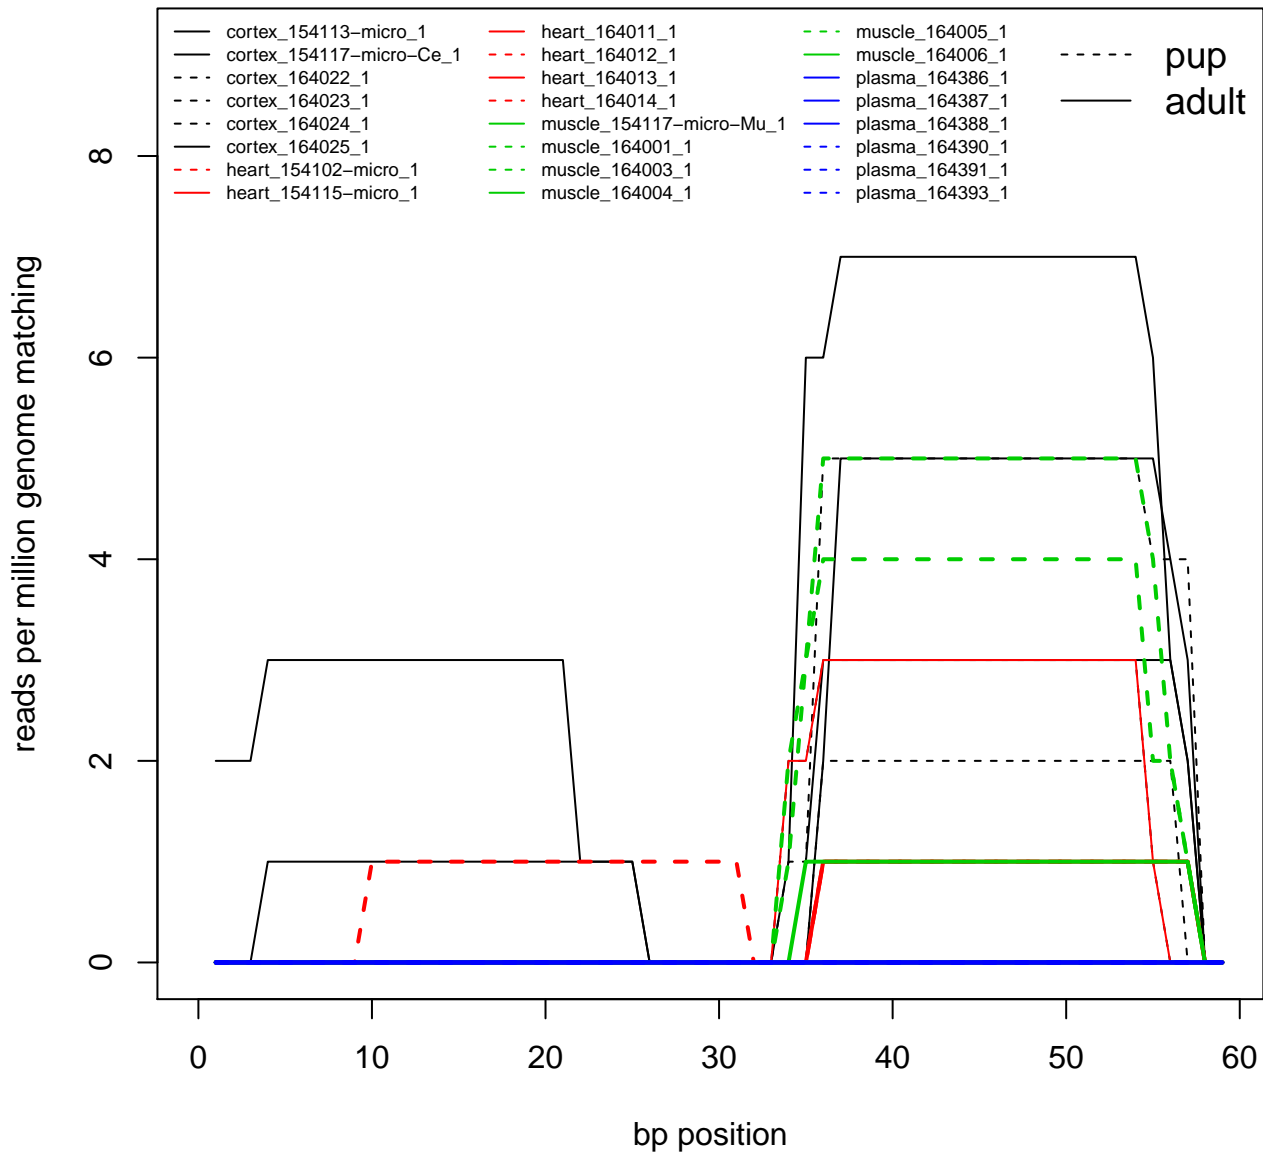

# lwe-miR-146b\_miRDeep2\_loc1

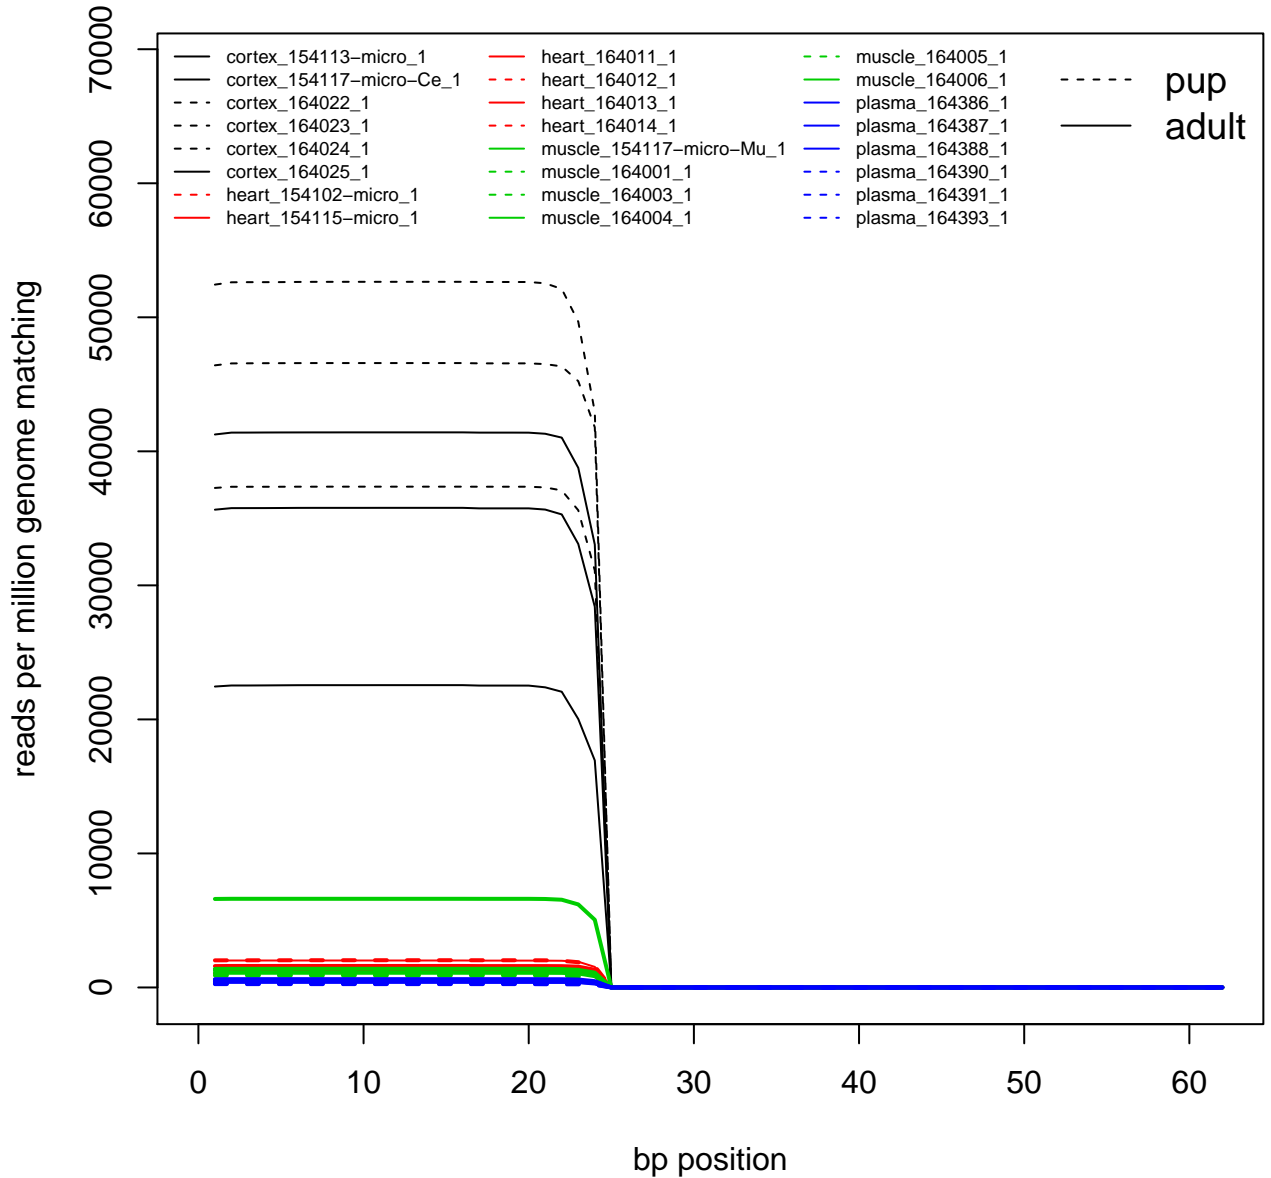

# lwe-miR-141;lwe-miR-200a;lwe-miR-3548\_loc1

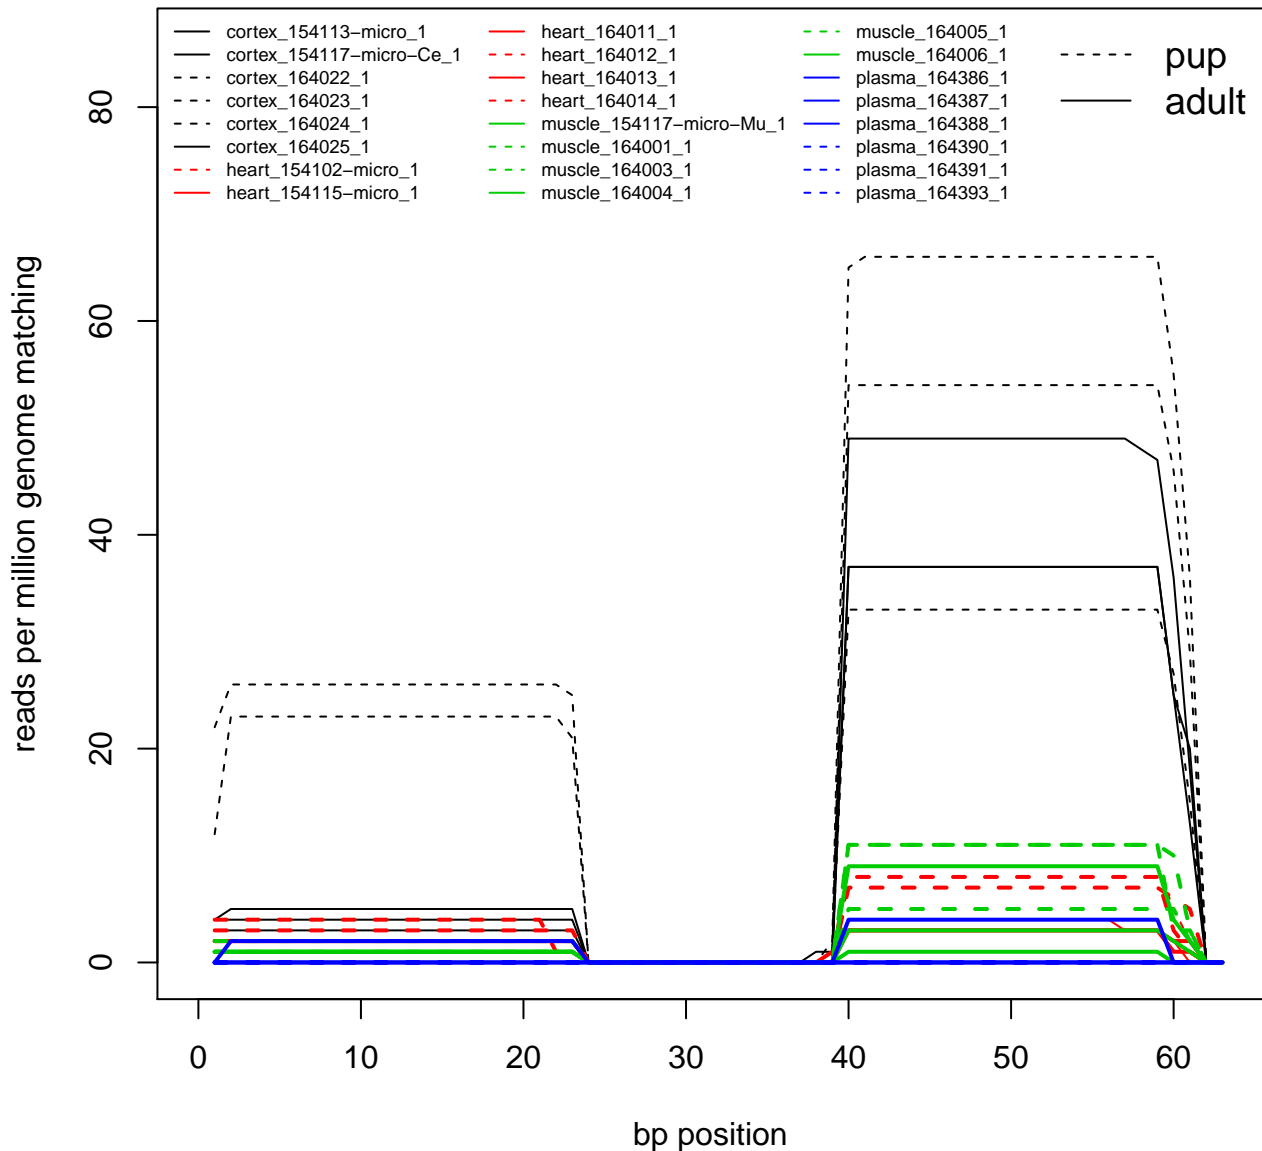

# lwe-miR-302a\_miRDeep2\_loc1

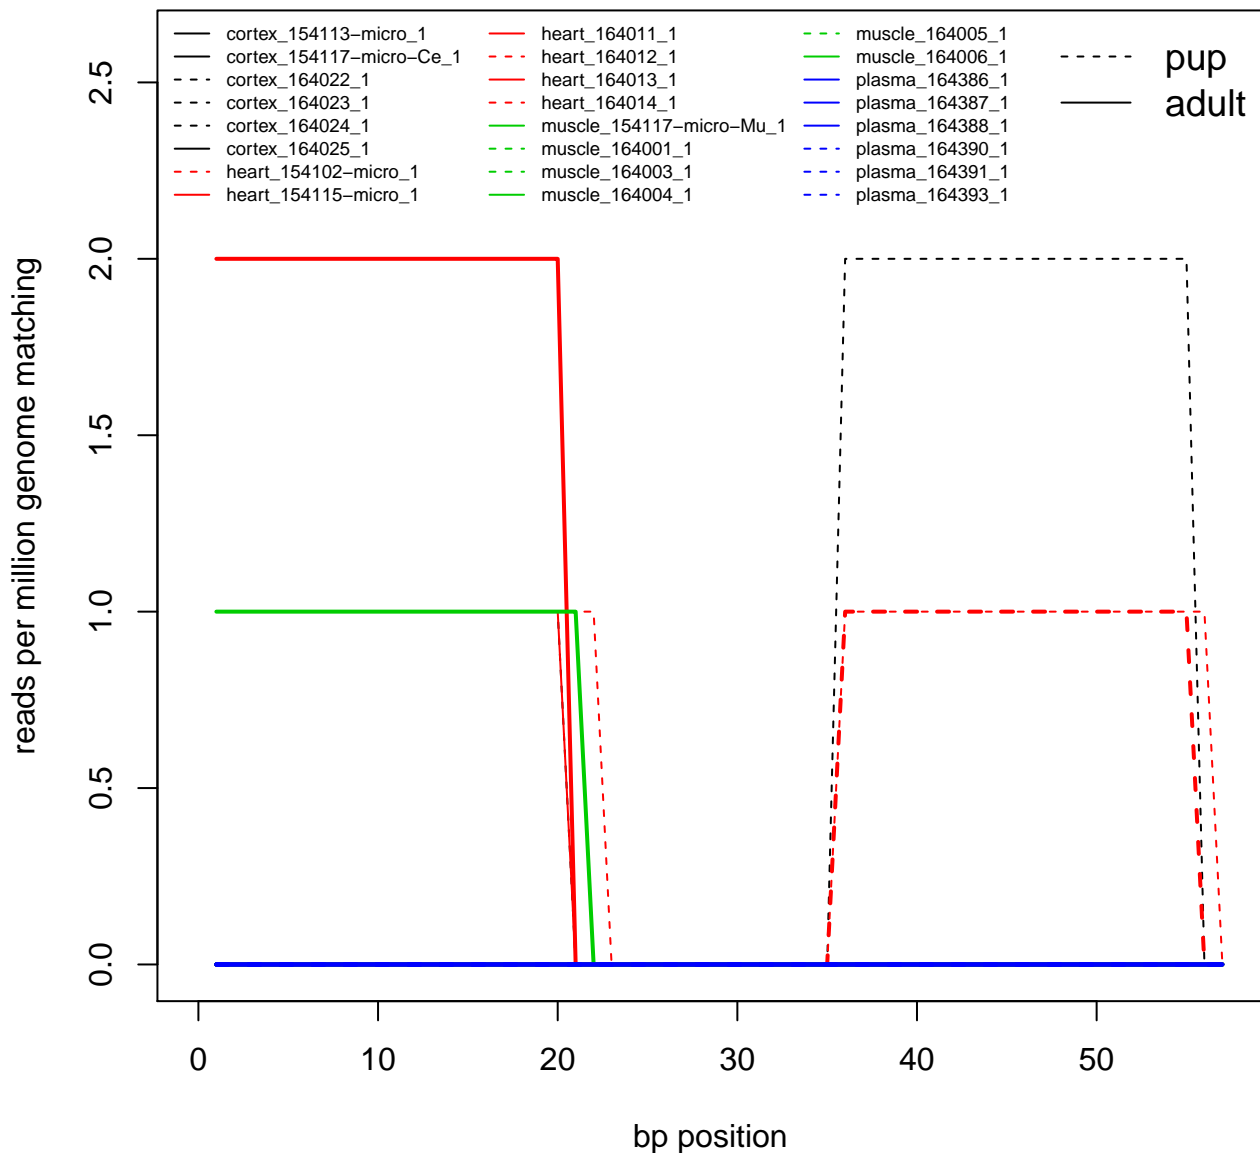



# lwe-miR-79;lwe-miR-9\_loc1

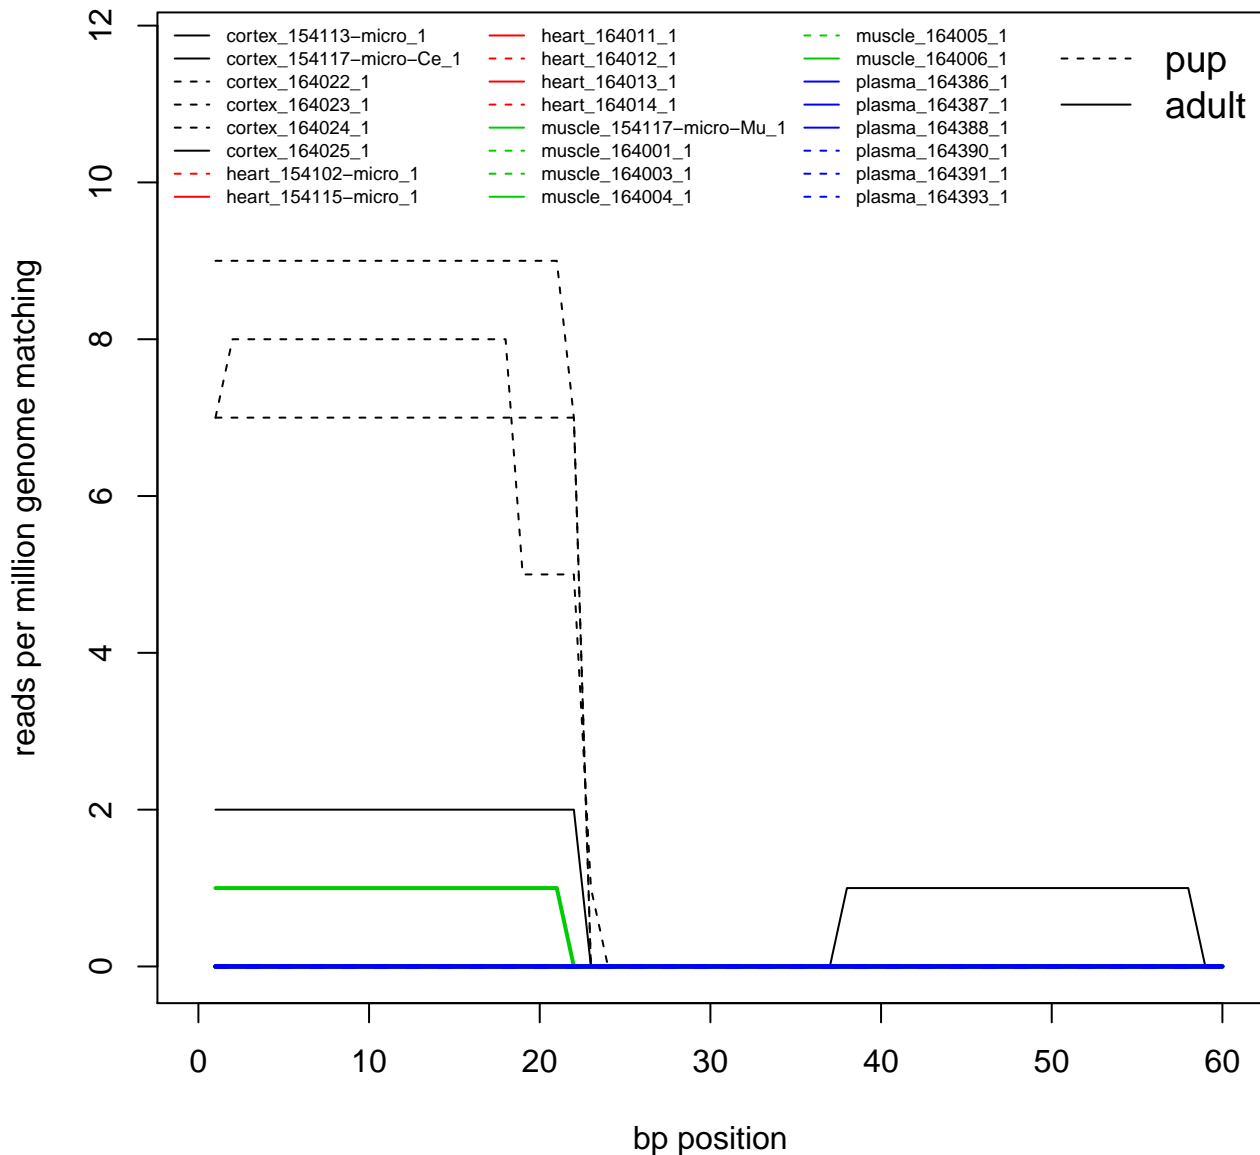

# WS\_miRDeep2\_novel\_22

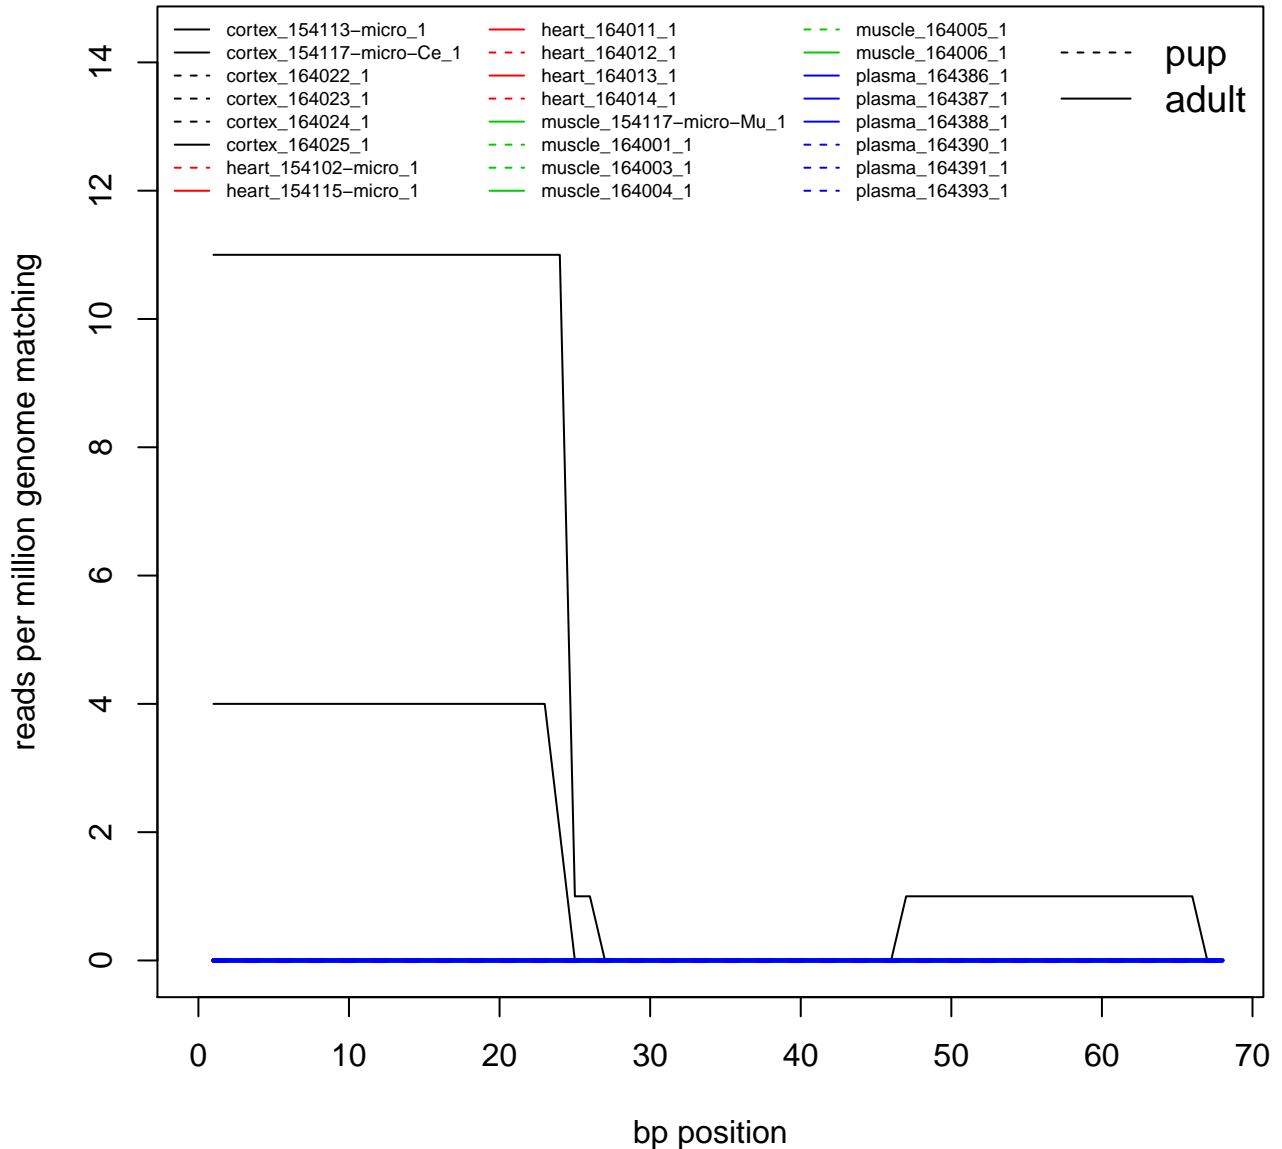

# WS\_miRDeep2\_novel\_23

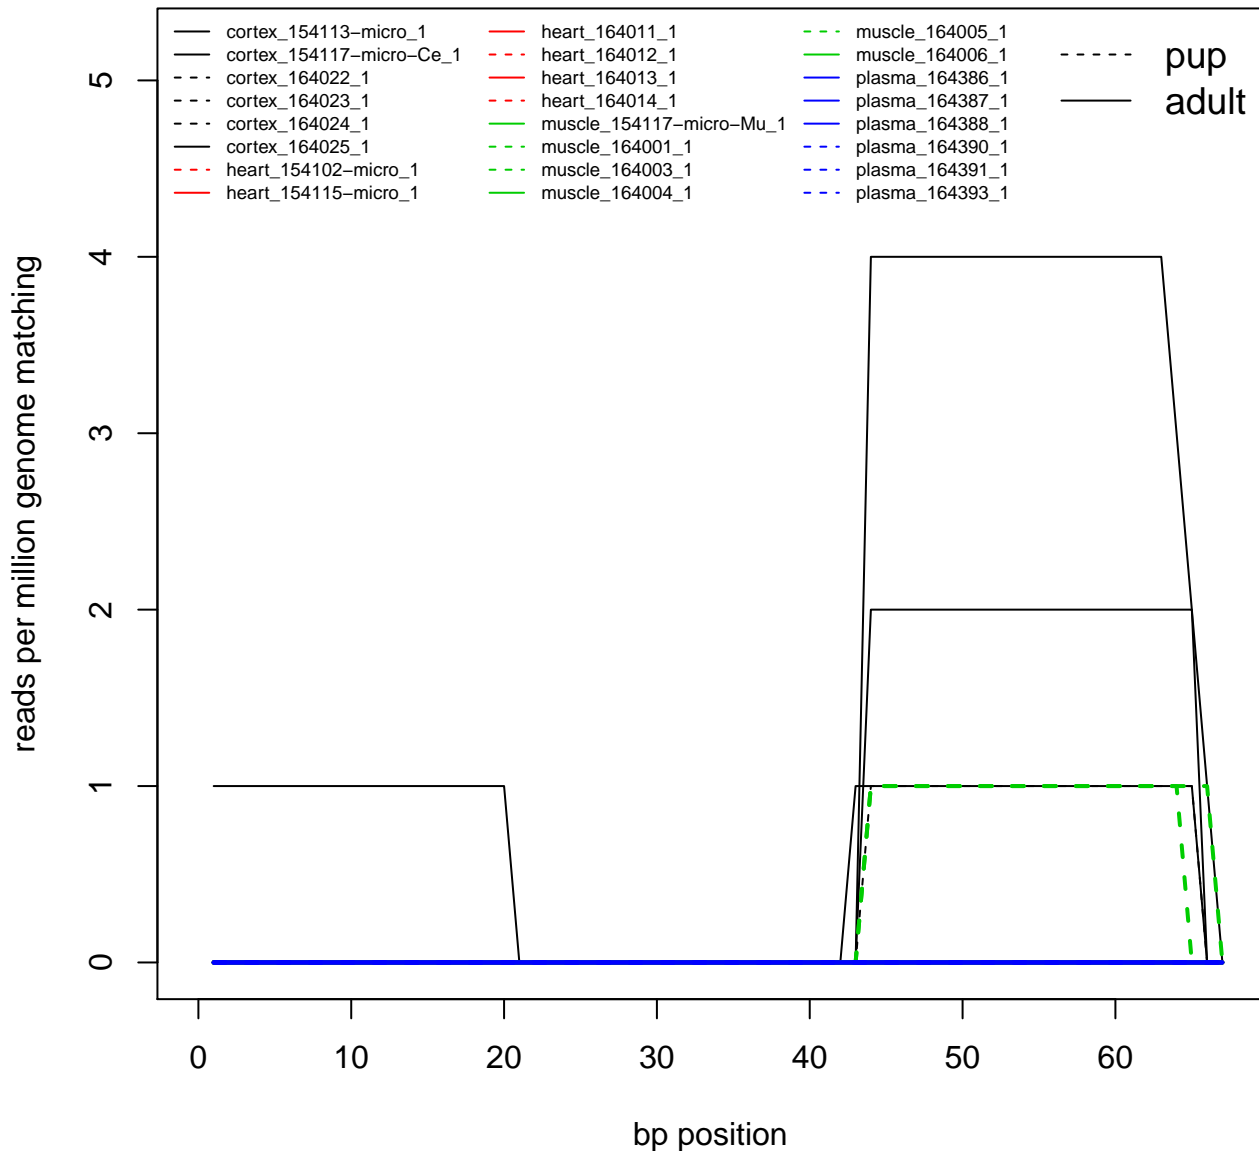



# WS\_miRDeep2\_novel\_24

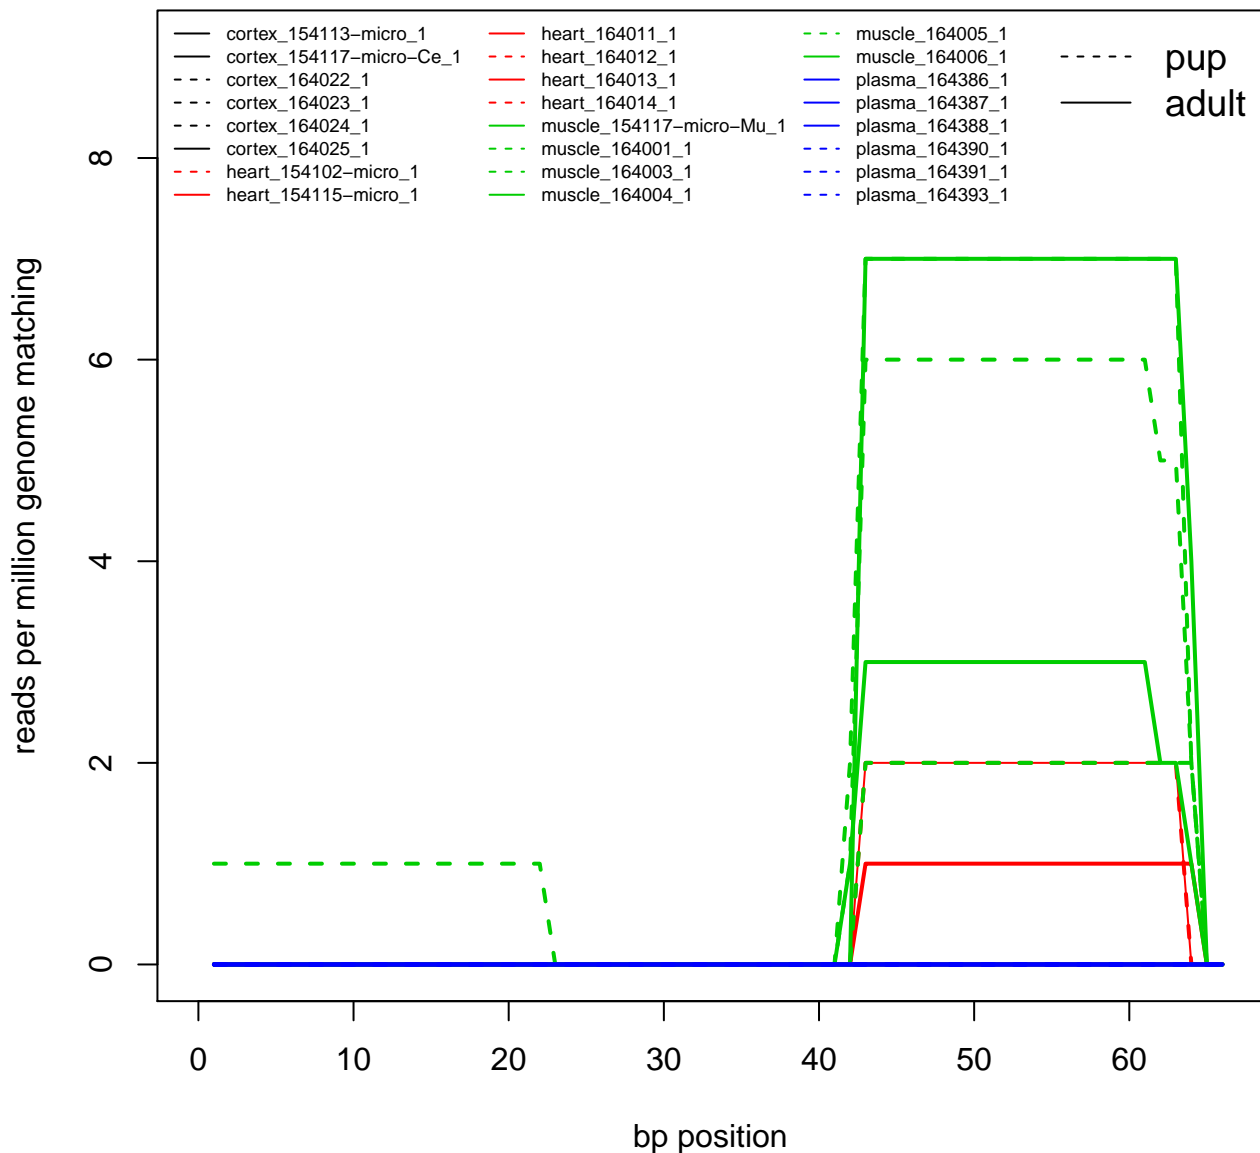

# WS\_miRDeep2\_novel\_25

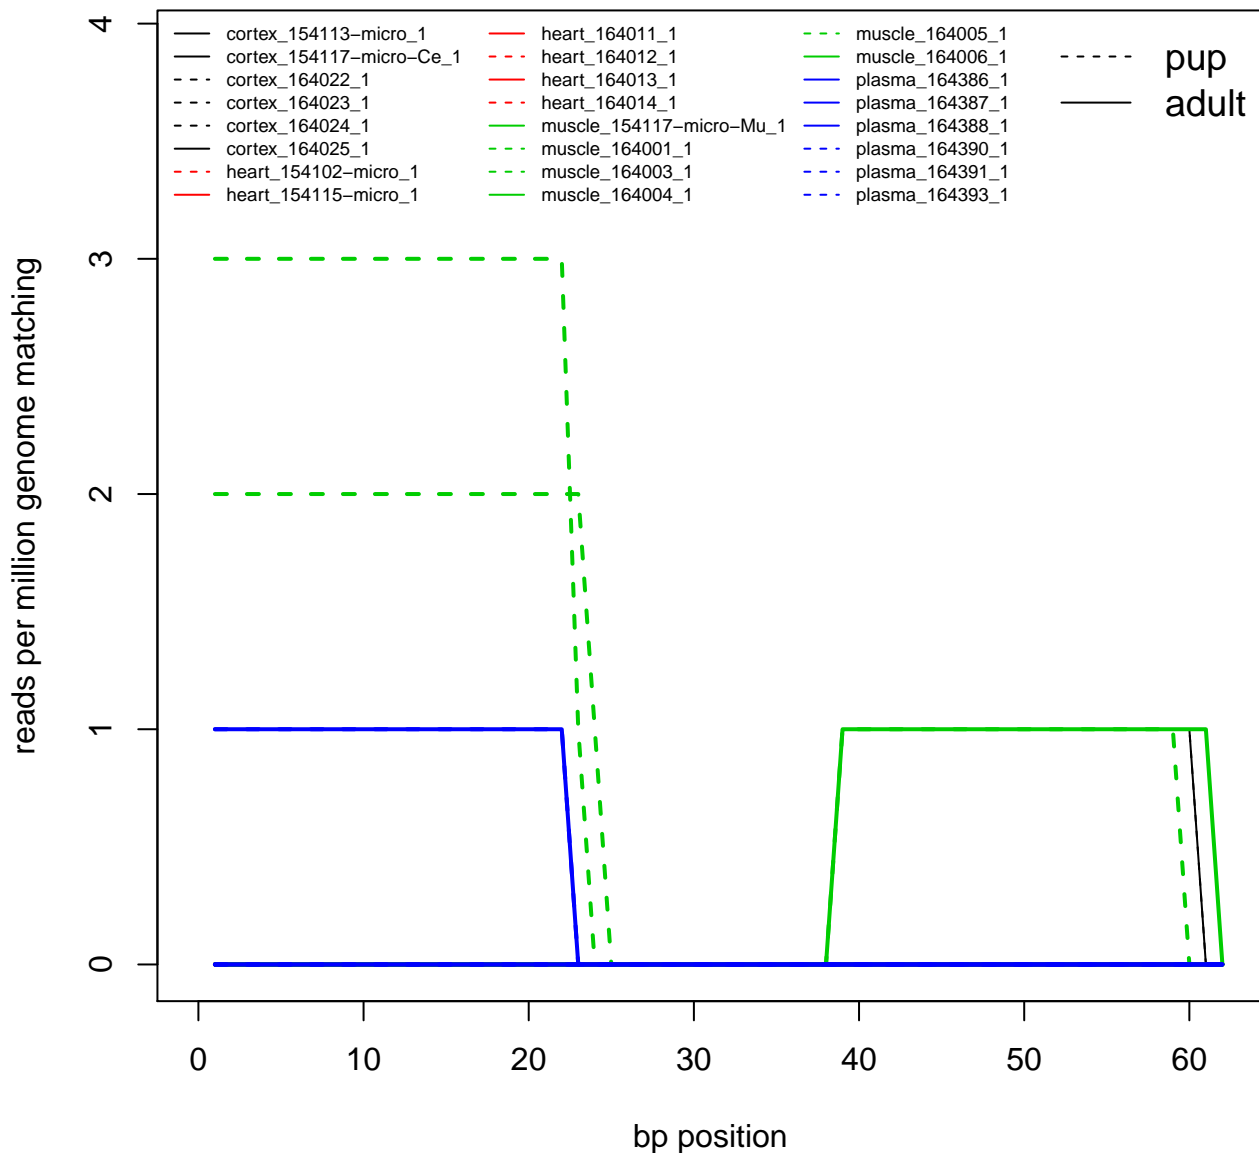

# WS\_miRDeep2\_novel\_26

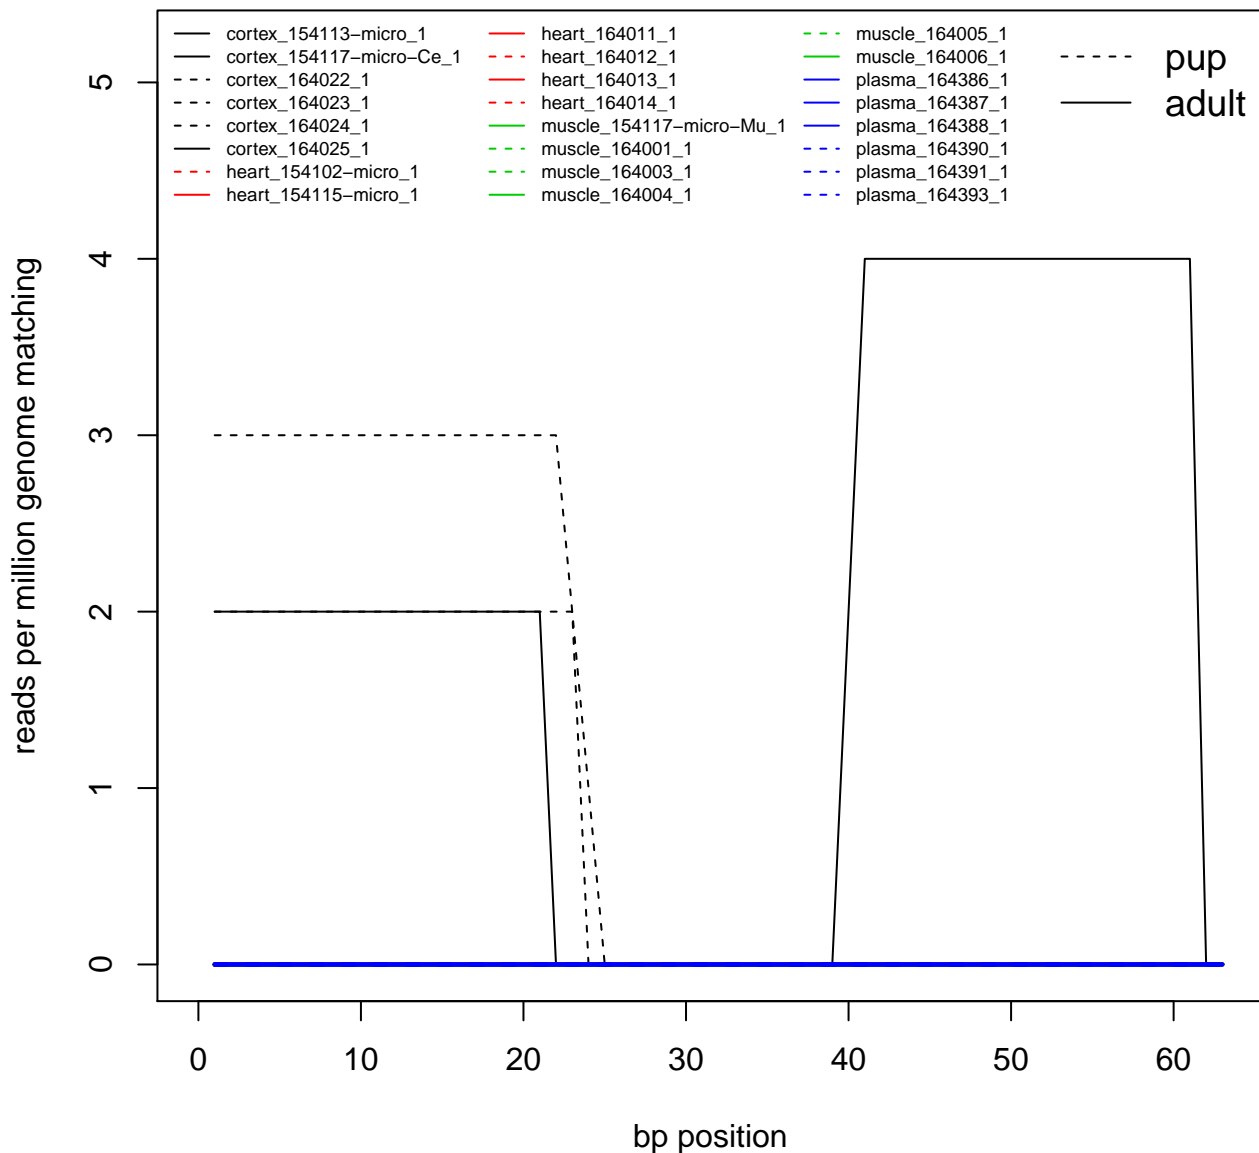

# WS\_miRDeep2\_novel\_27

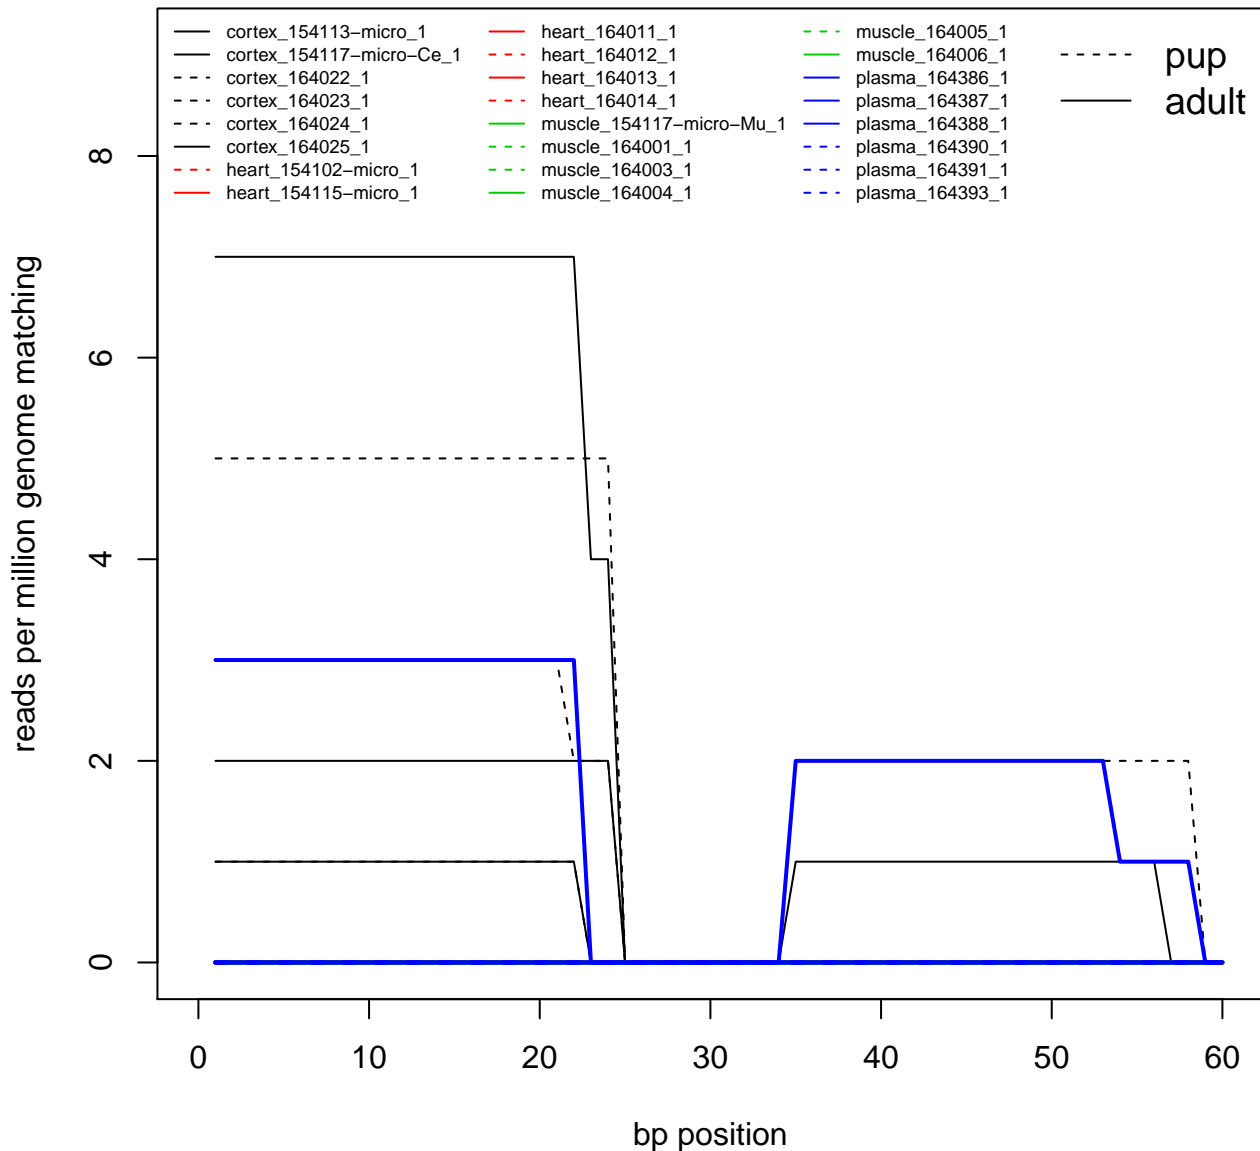

# lwe-miR-374b\_miRDeep2\_loc1

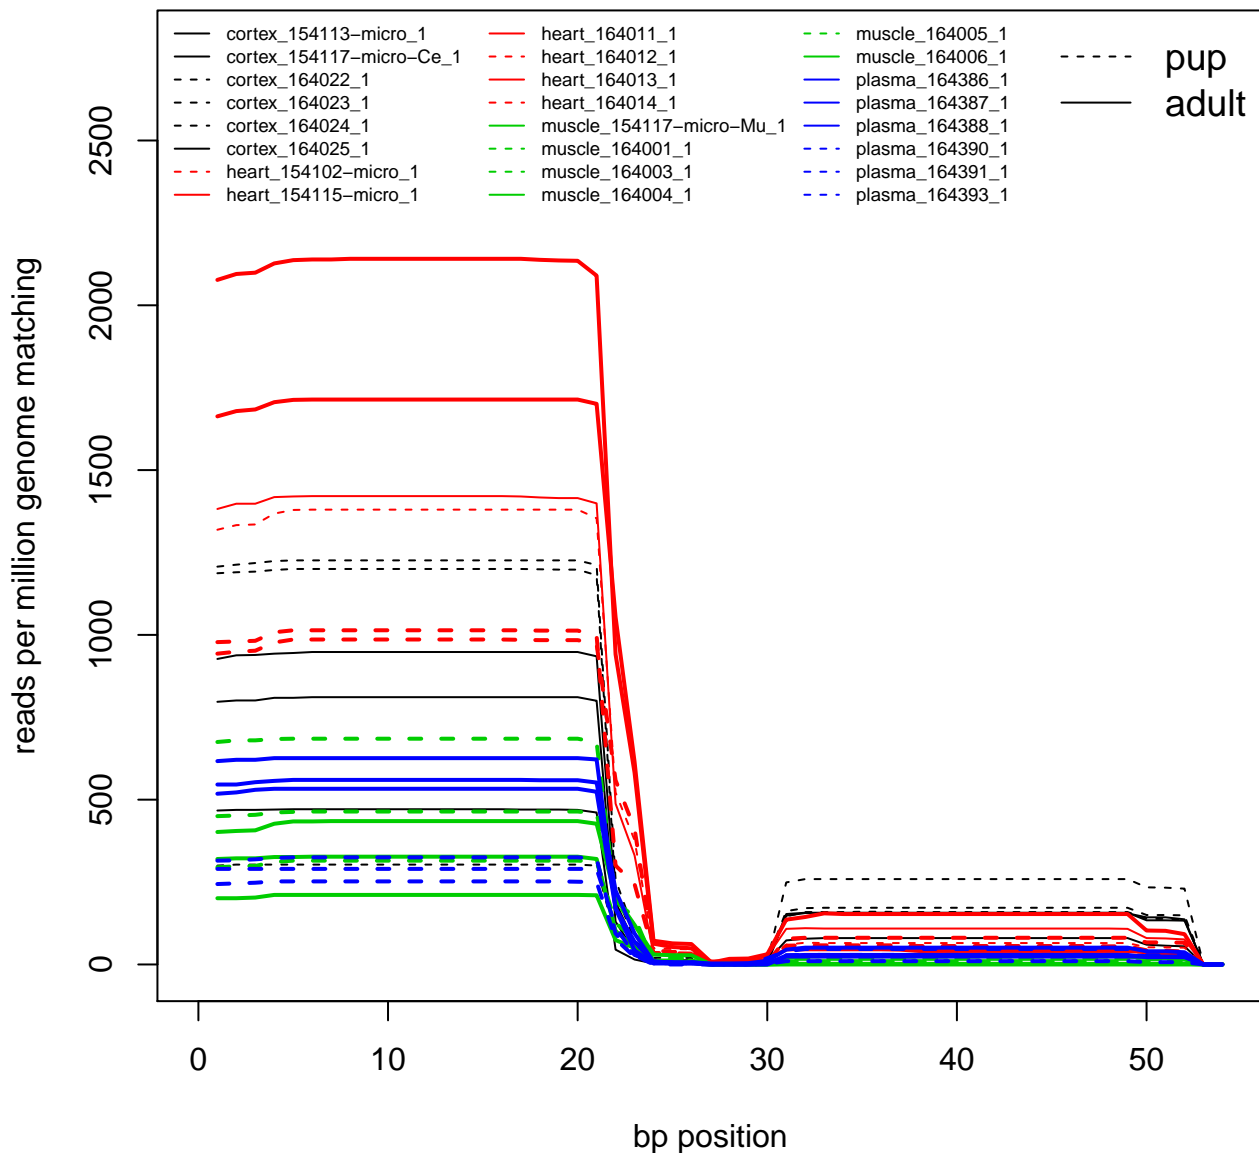

# WS\_miRDeep2\_novel\_28

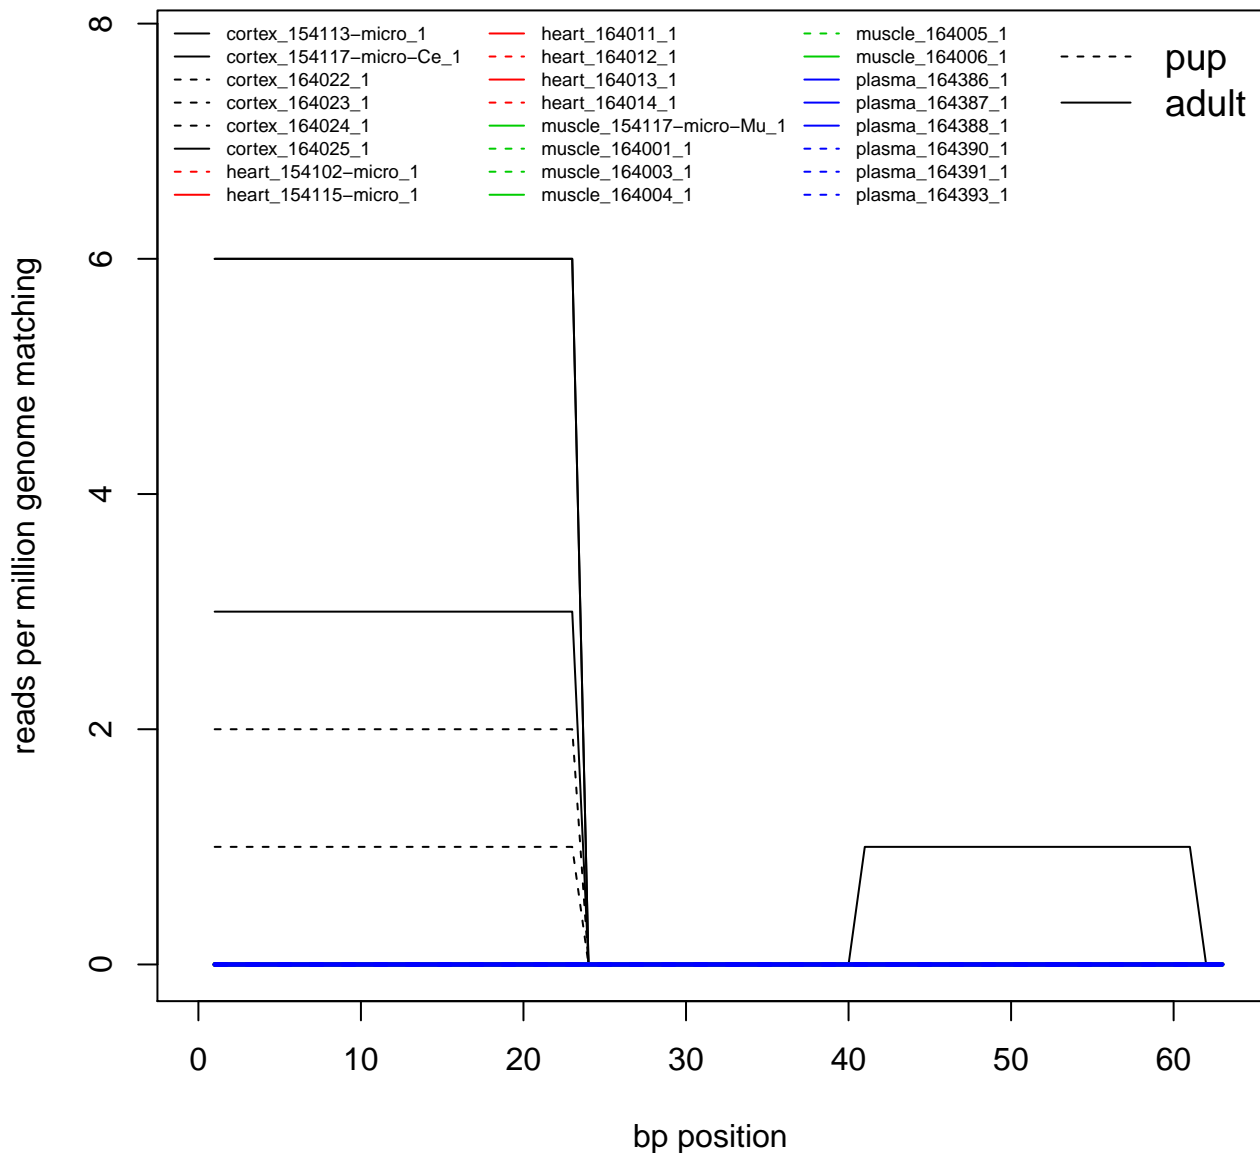



# WS\_miRDeep2\_novel\_30

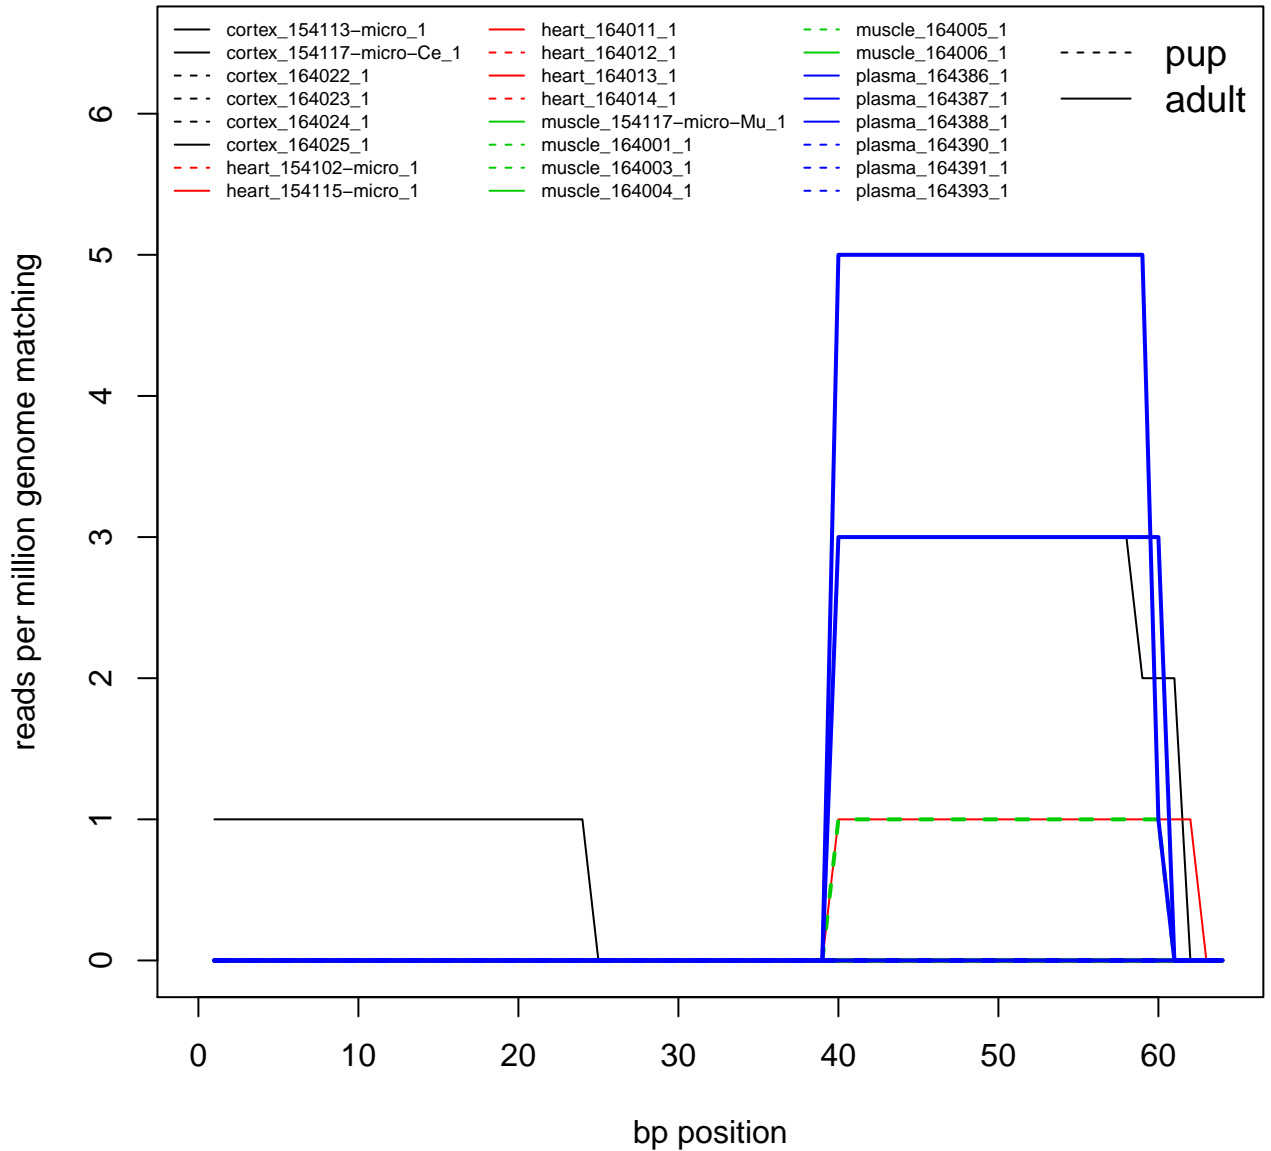



# WS\_miRDeep2\_novel\_31

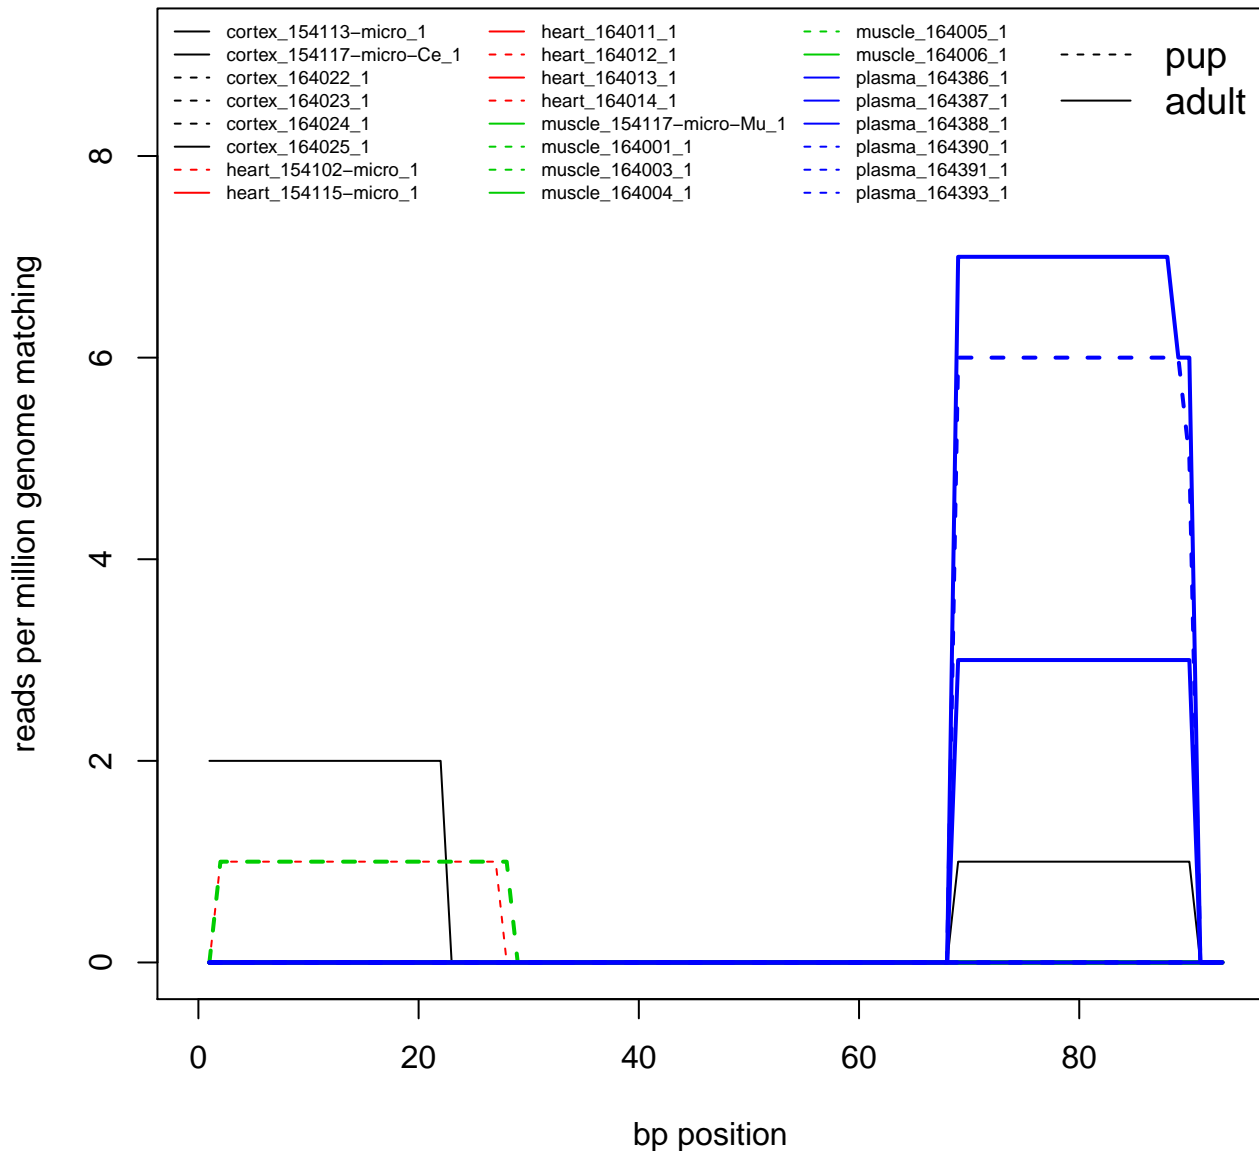

# WS\_miRDeep2\_novel\_32

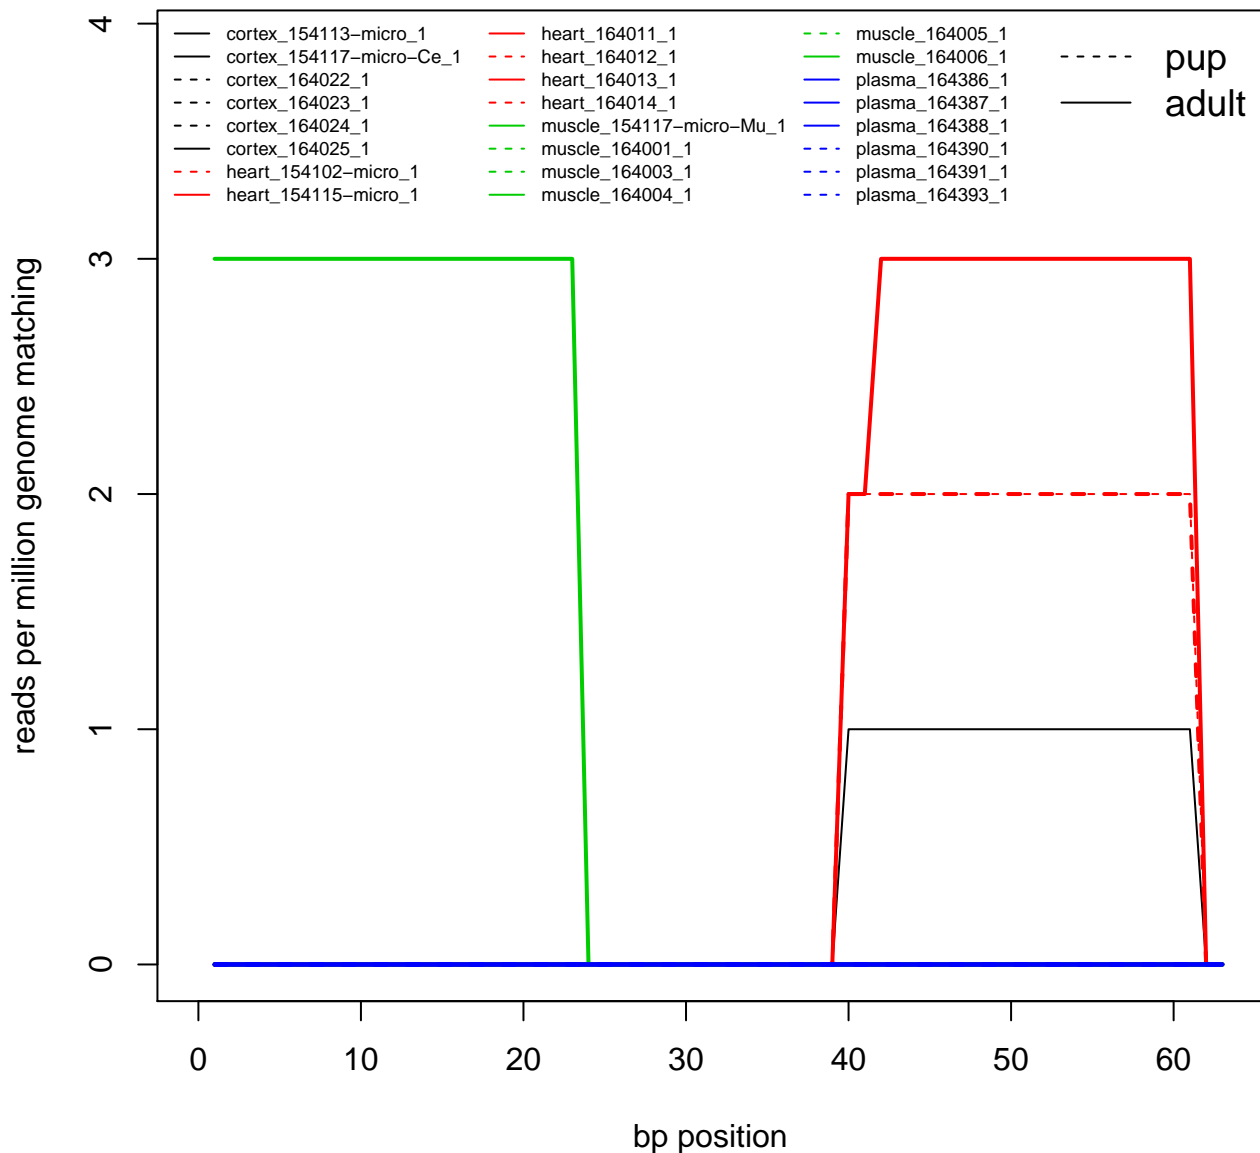

# WS\_miRDeep2\_novel\_33

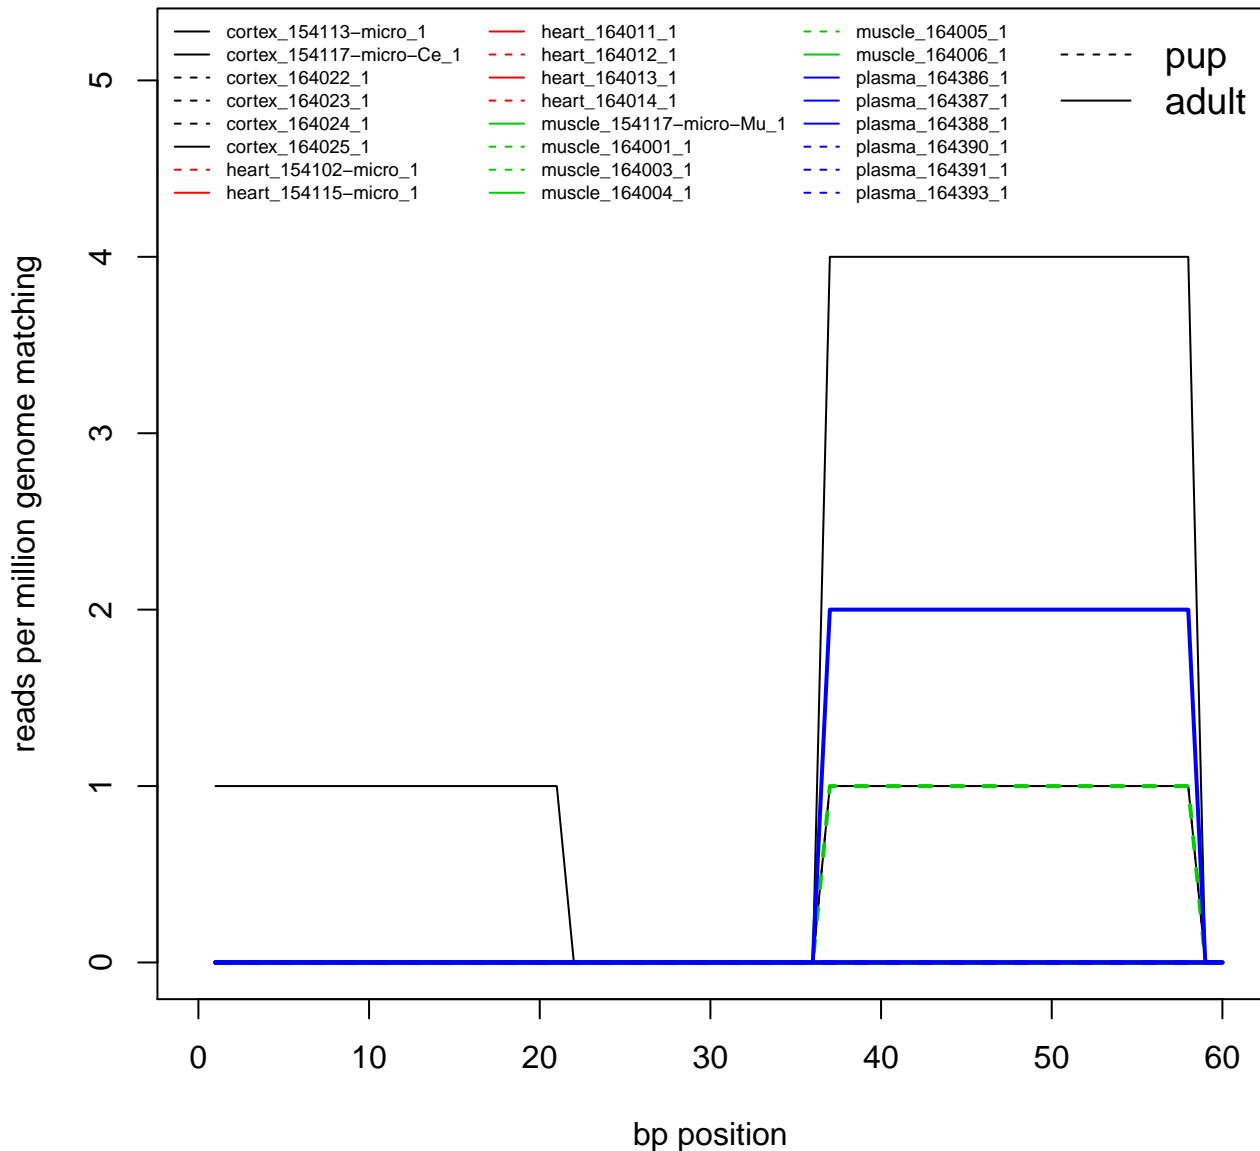

# WS\_miRDeep2\_novel\_34

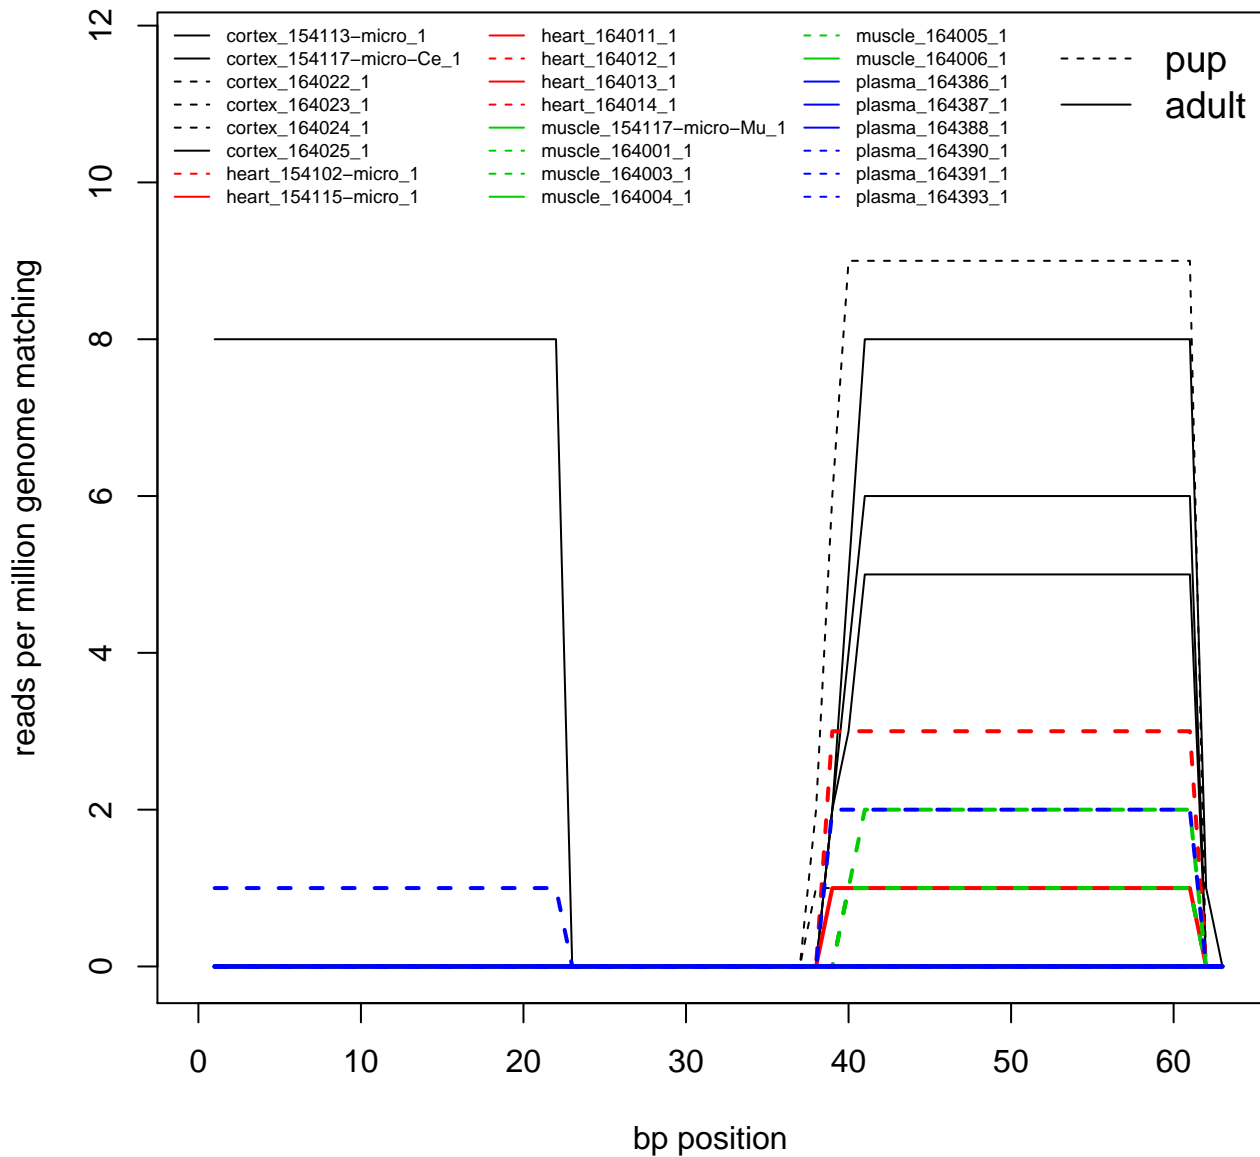

# WS\_miRDeep2\_novel\_35

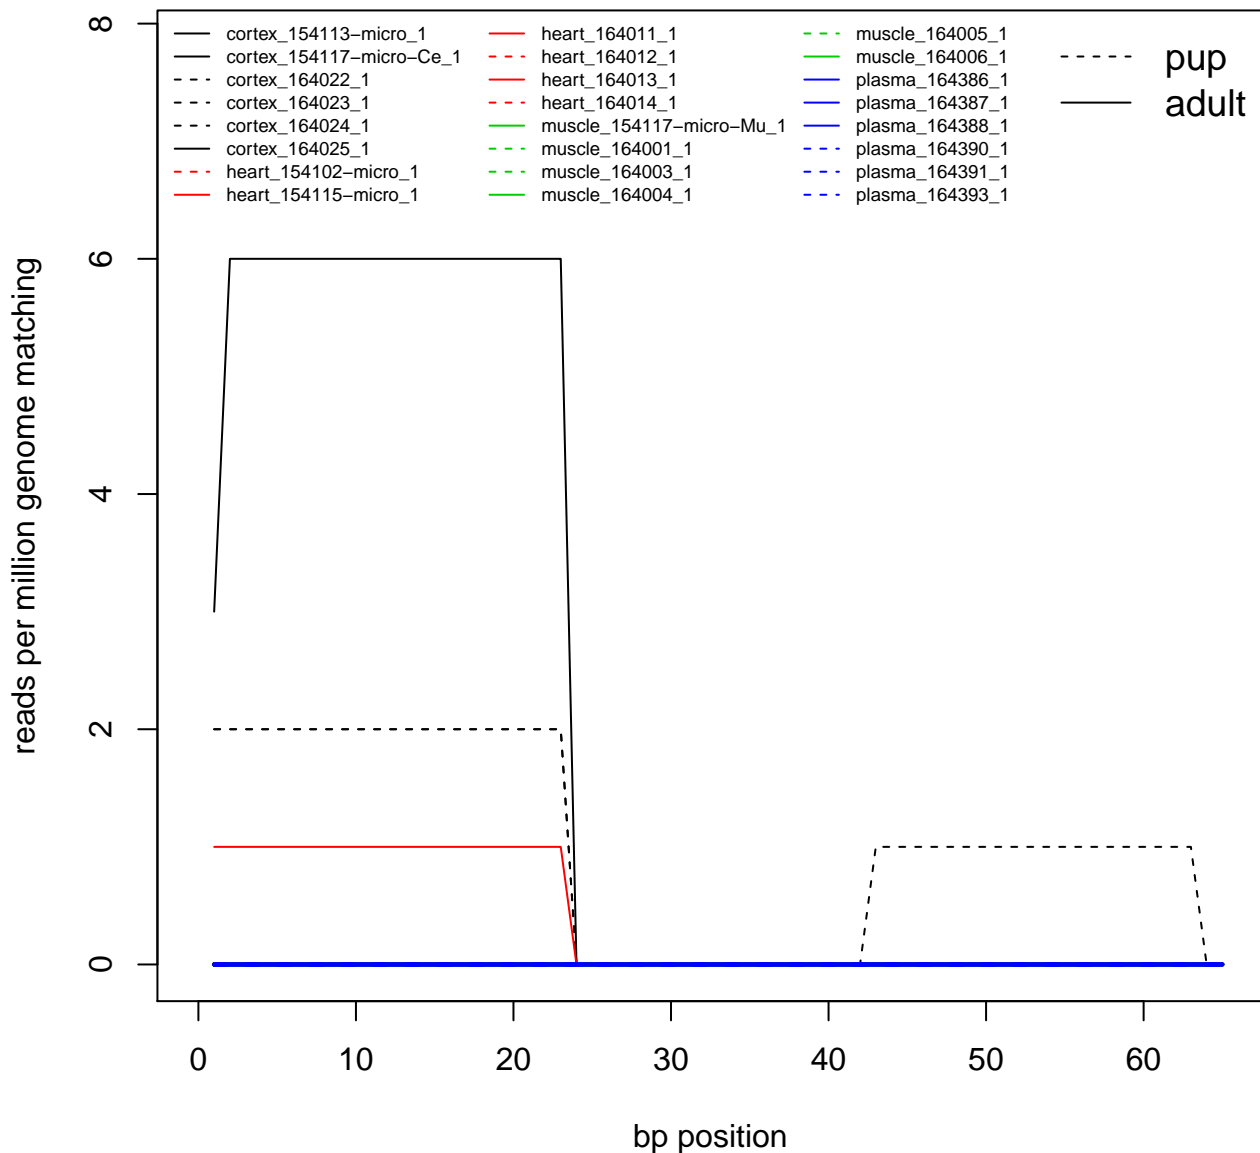



# WS\_miRDeep2\_novel\_37

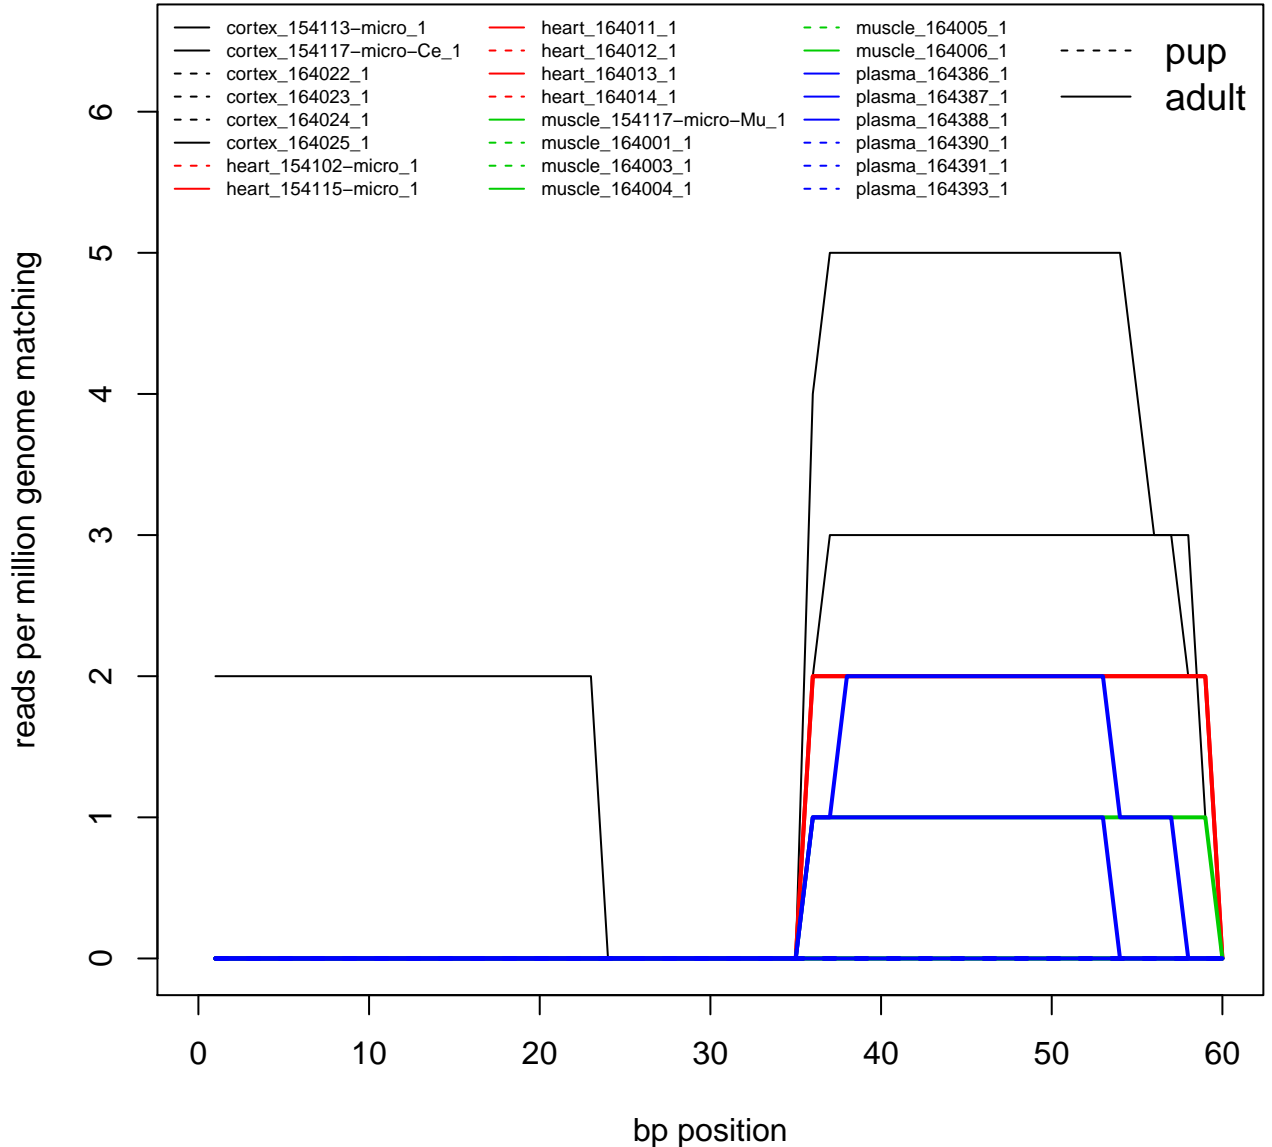

# WS\_miRDeep2\_novel\_38

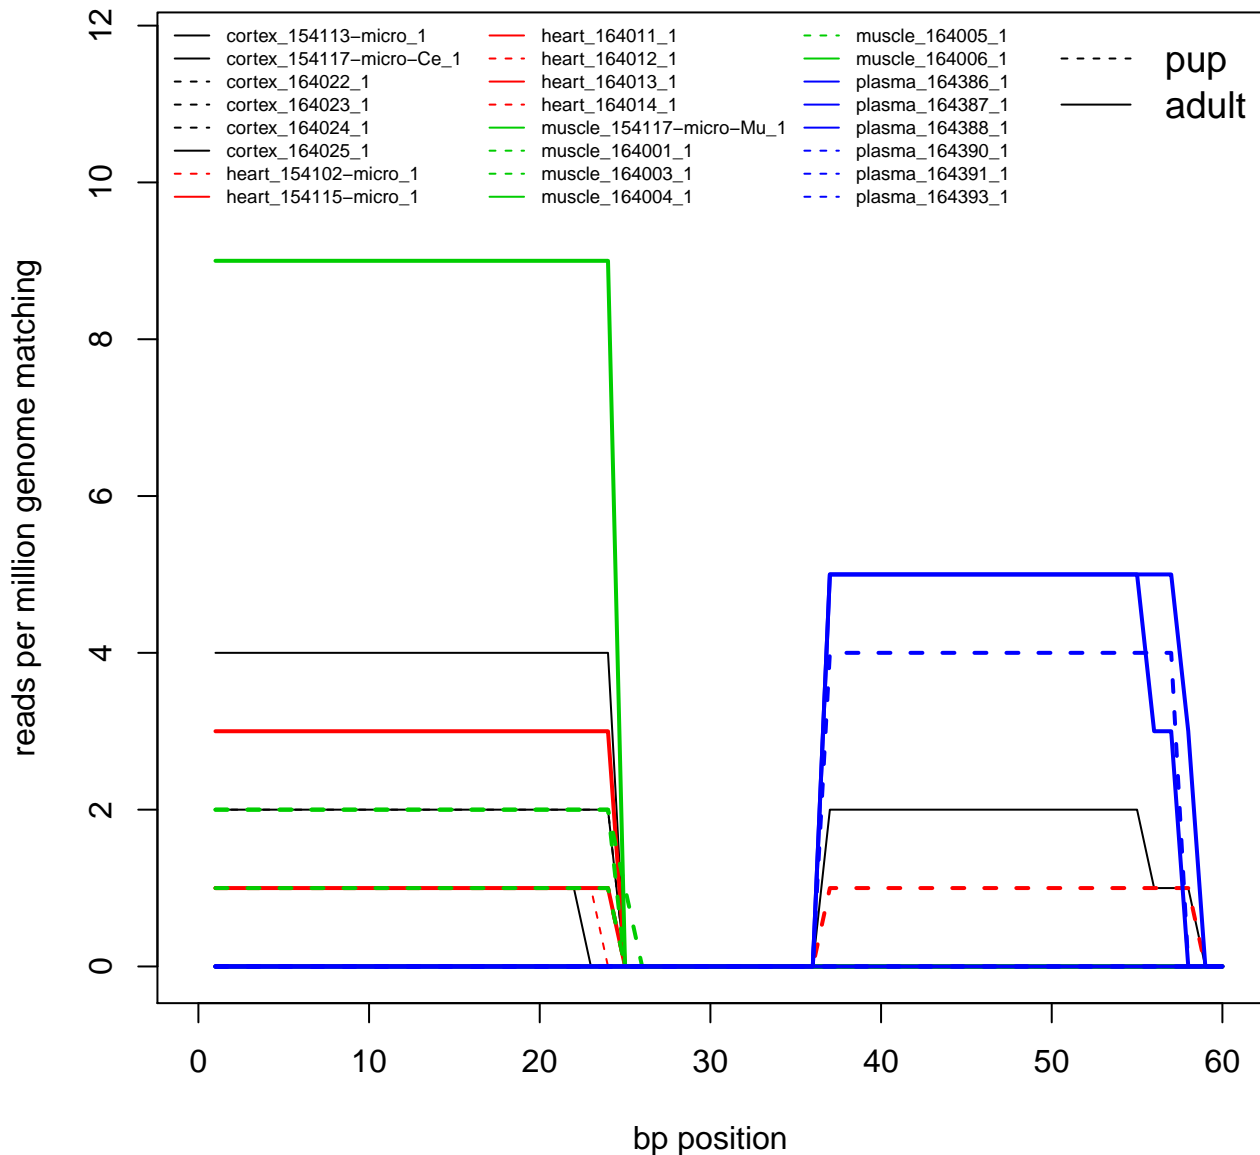



# WS\_miRDeep2\_novel\_39

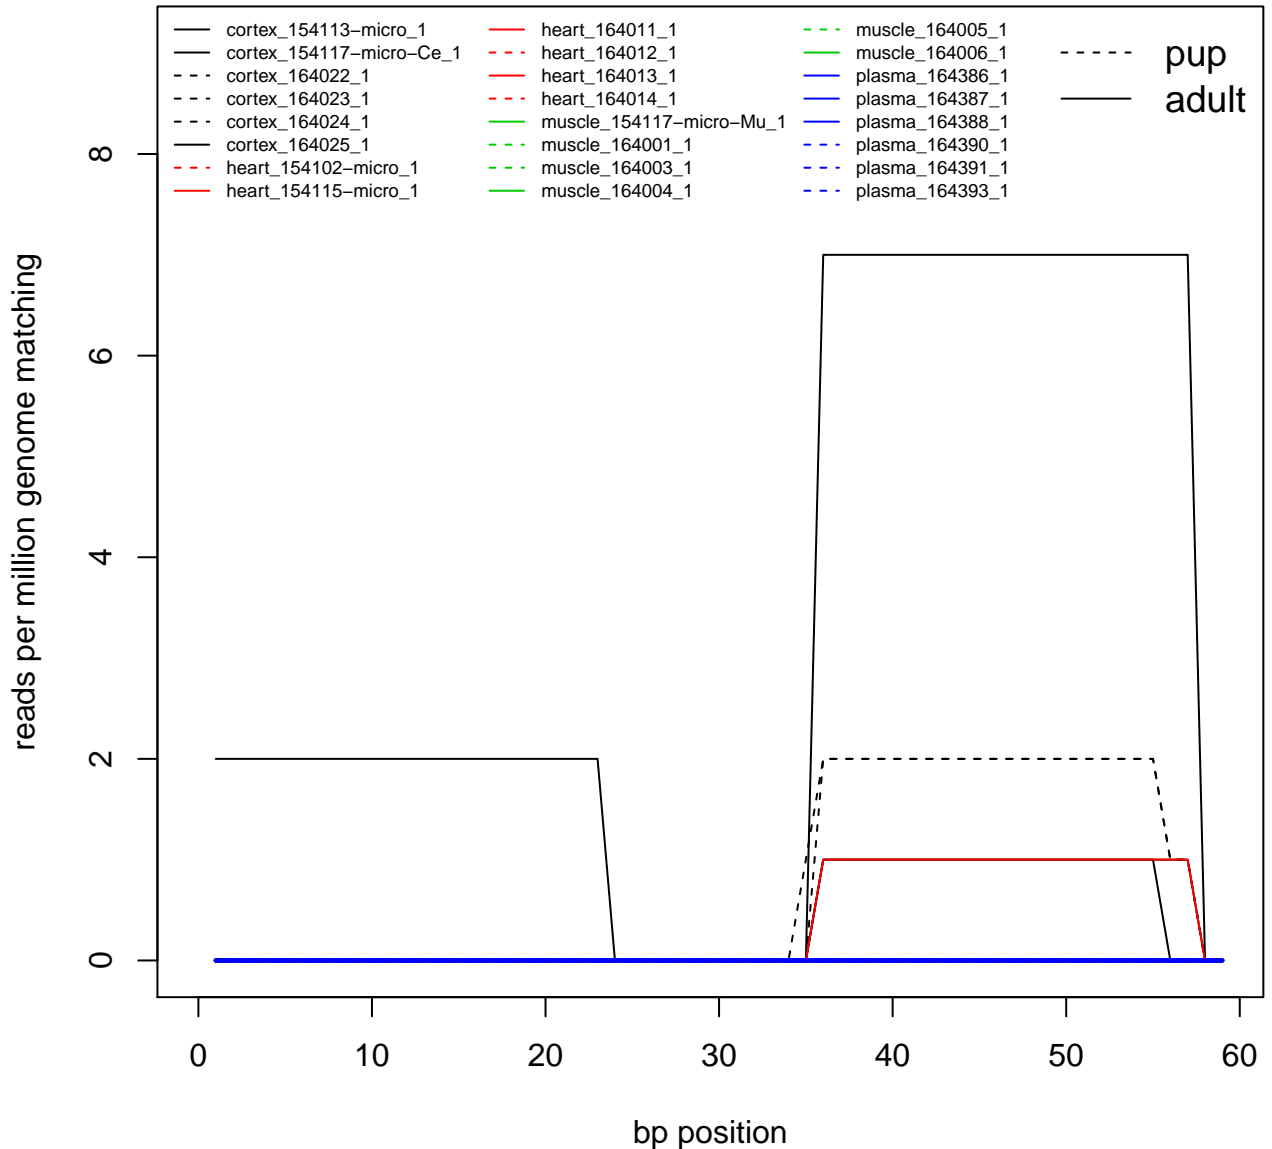

# lwe-miR-7143\_loc1

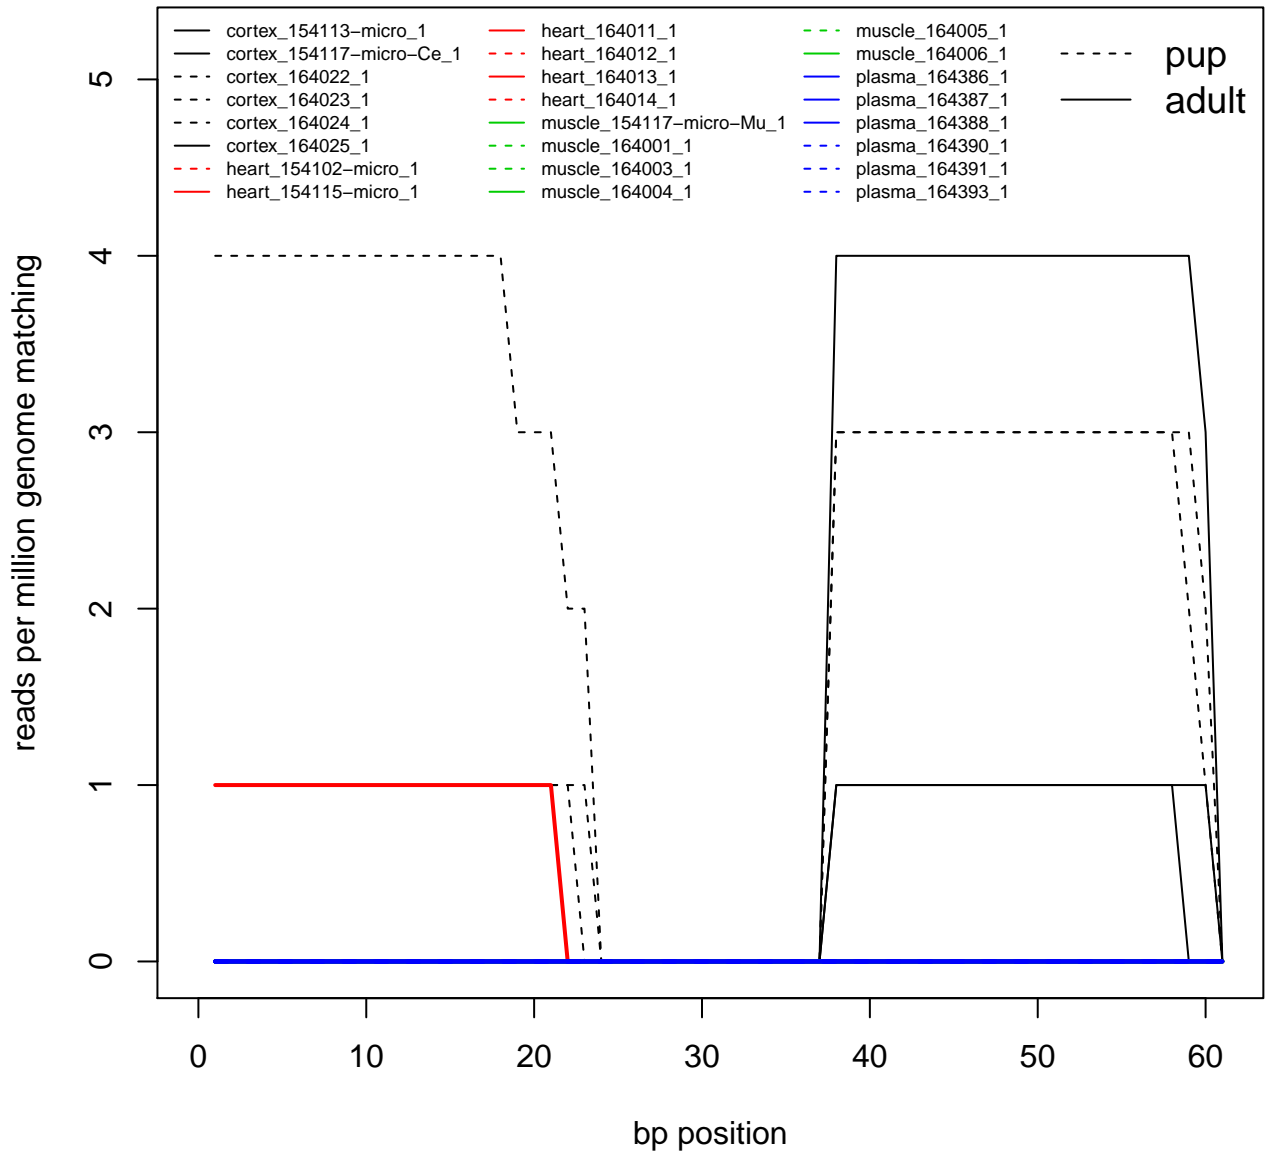

# WS\_miRDeep2\_novel\_41

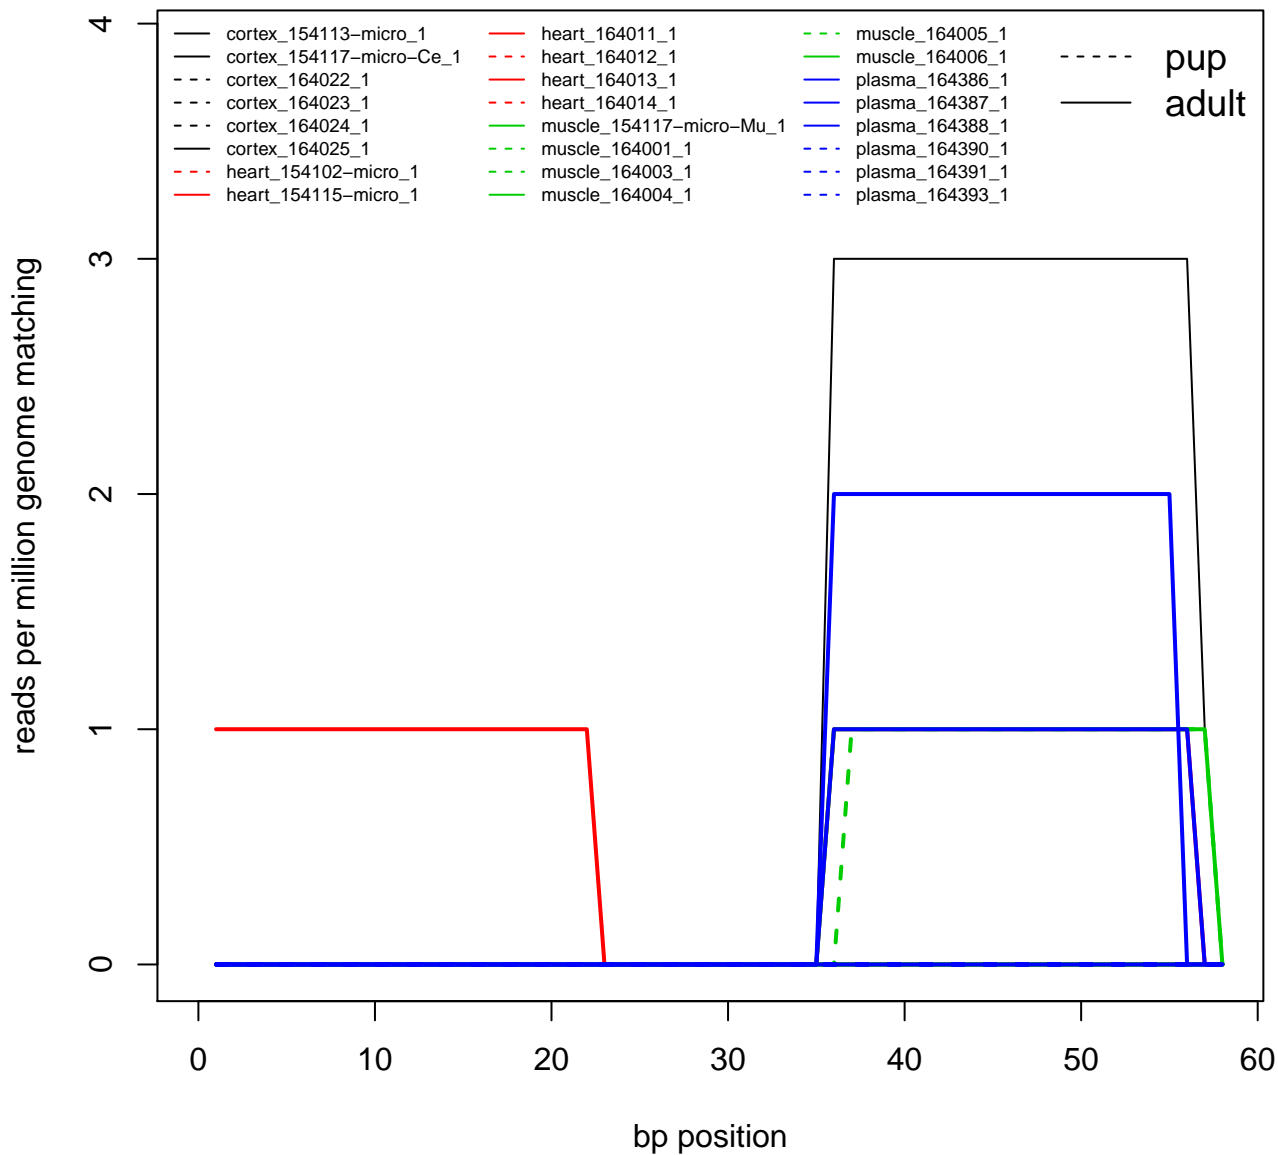

# WS\_miRDeep2\_novel\_42

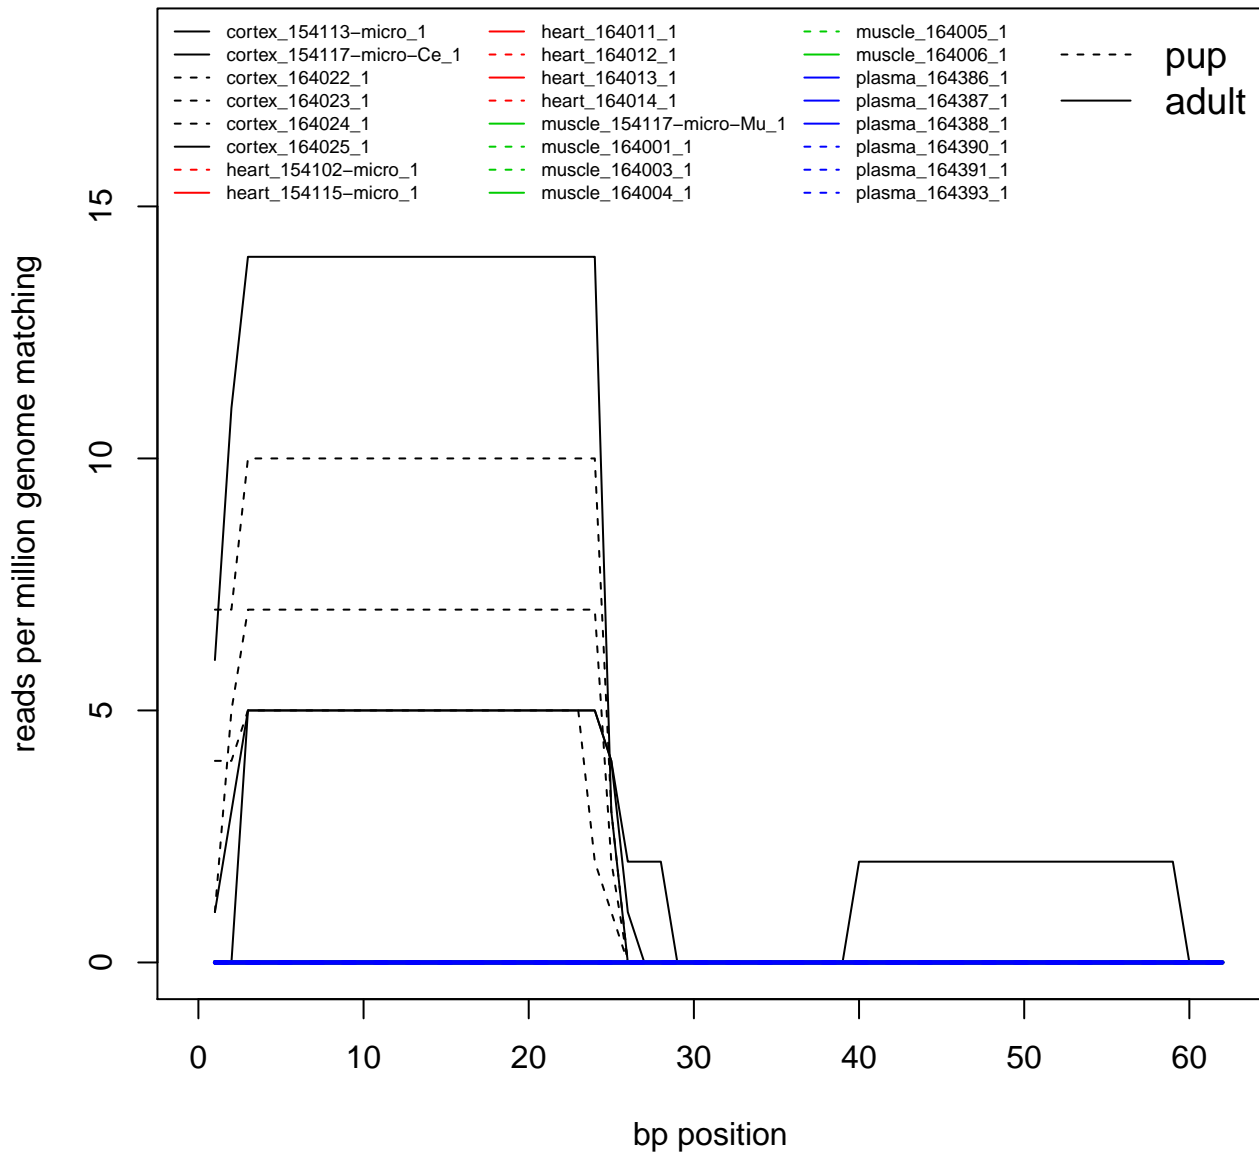

# WS\_miRDeep2\_novel\_43

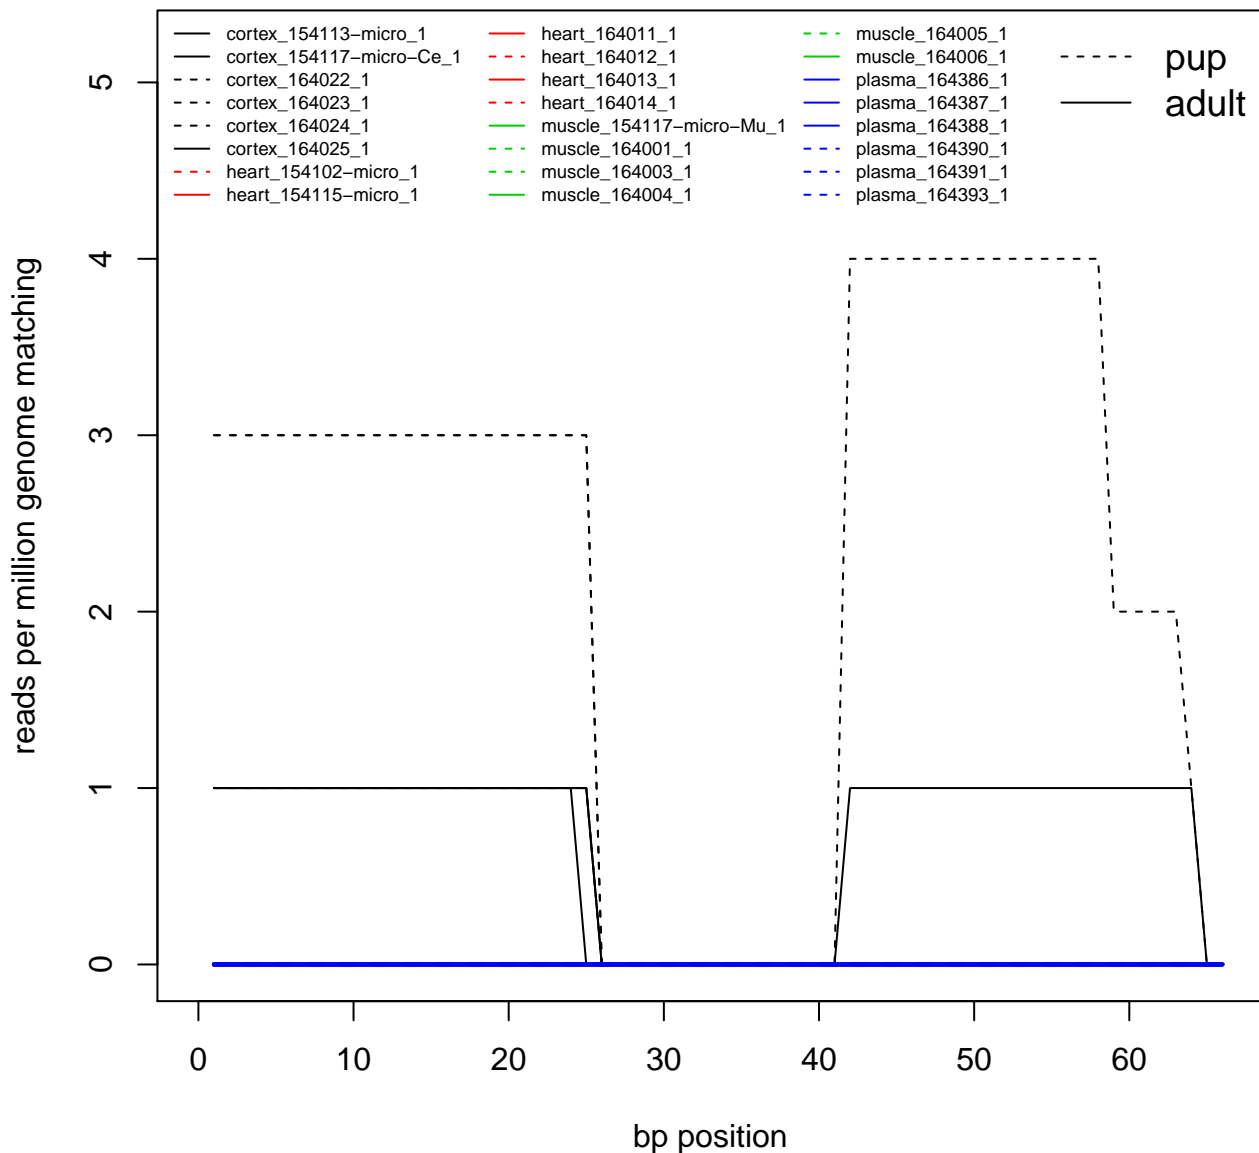

# WS\_miRDeep2\_novel\_44

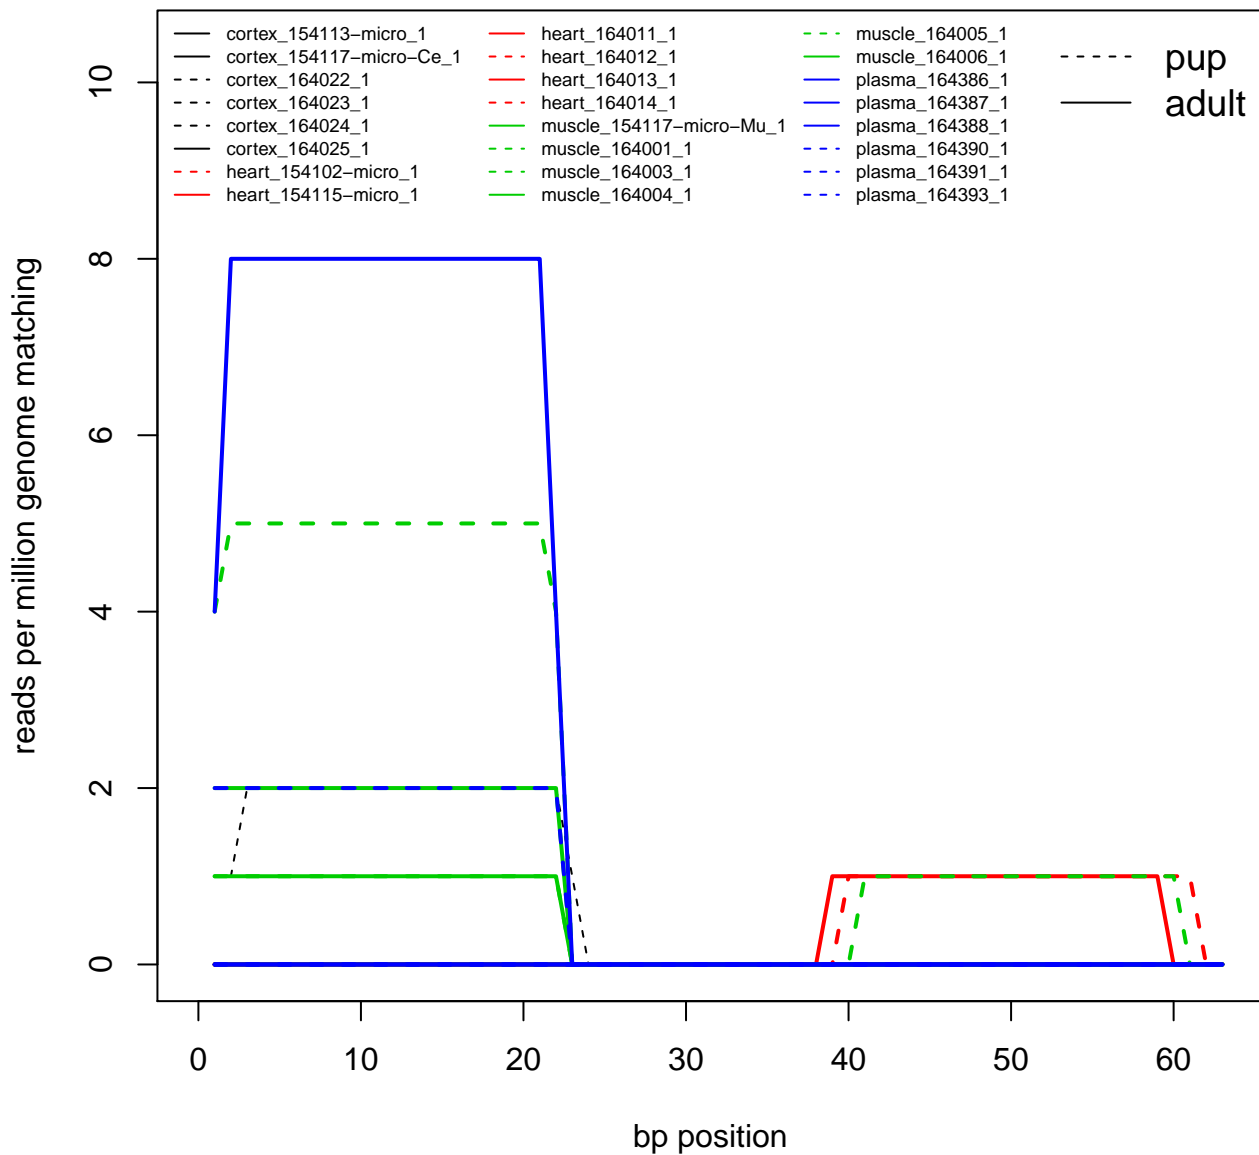



# Iwe-miR-192\_miRDeep2\_loc1

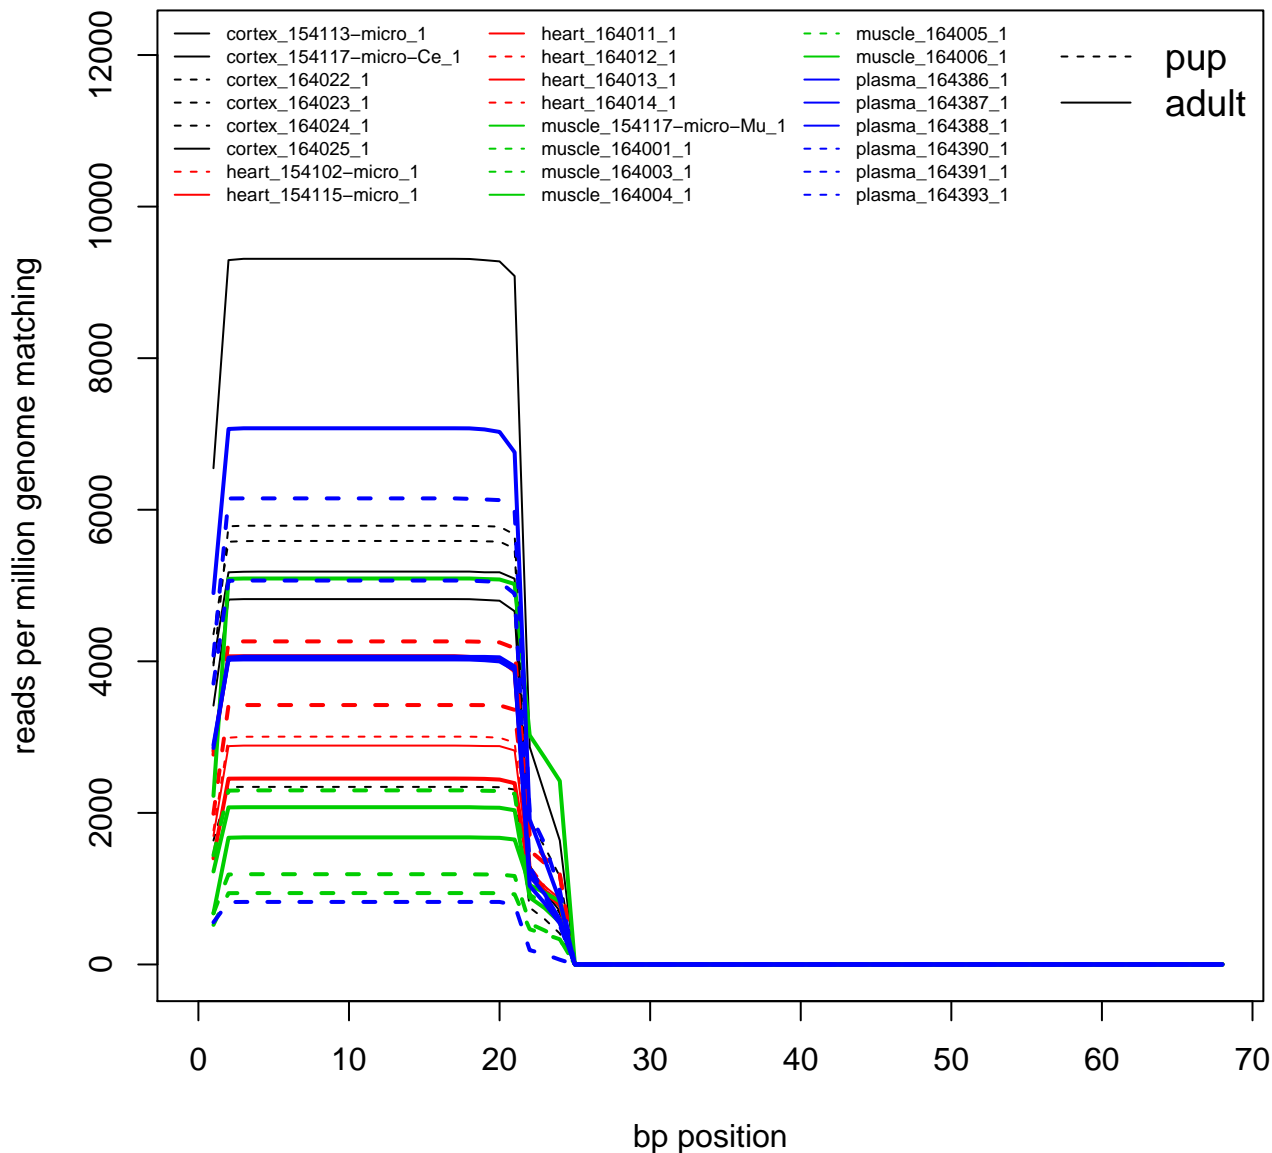



# lwe-miR-194\_miRDeep2\_loc1

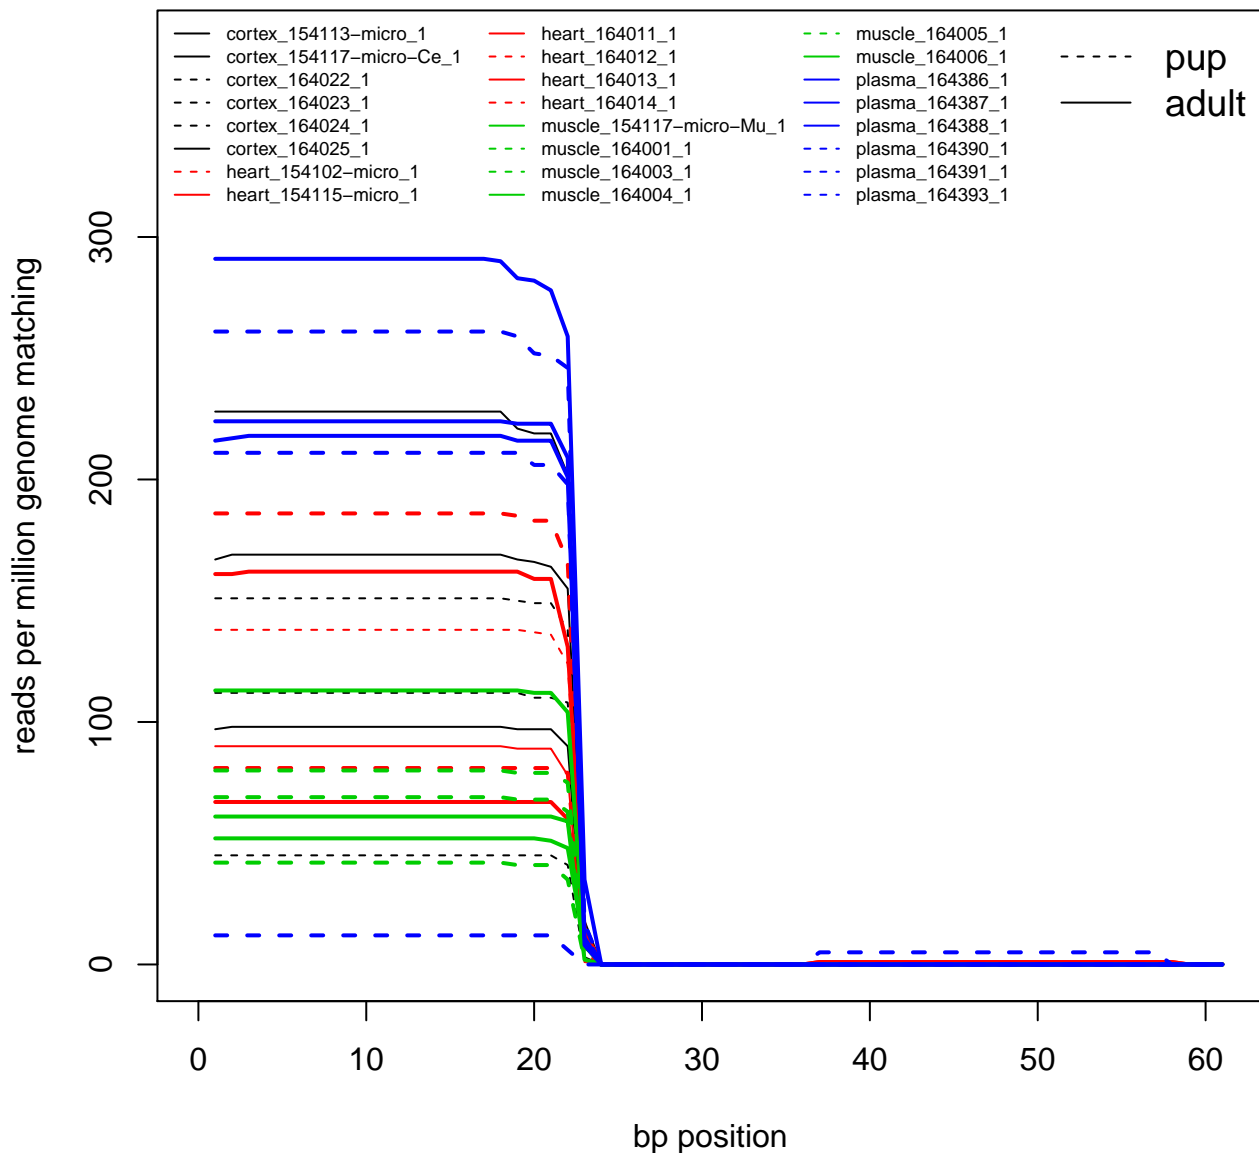

# WS\_miRDeep2\_novel\_45

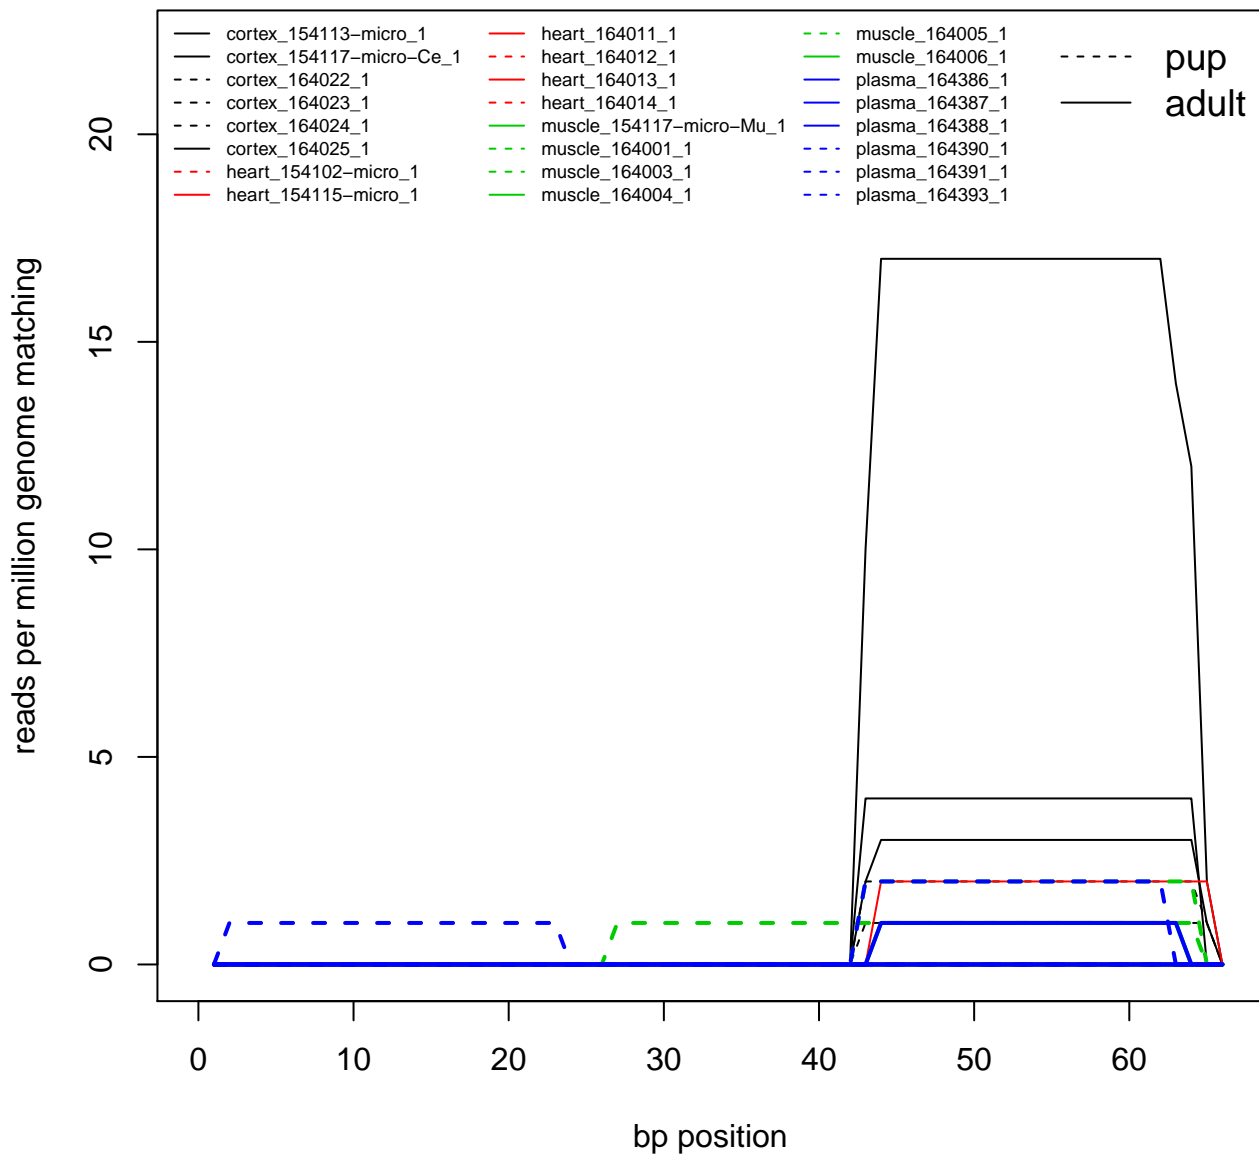

# lwe-miR-874\_miRDeep2\_loc1

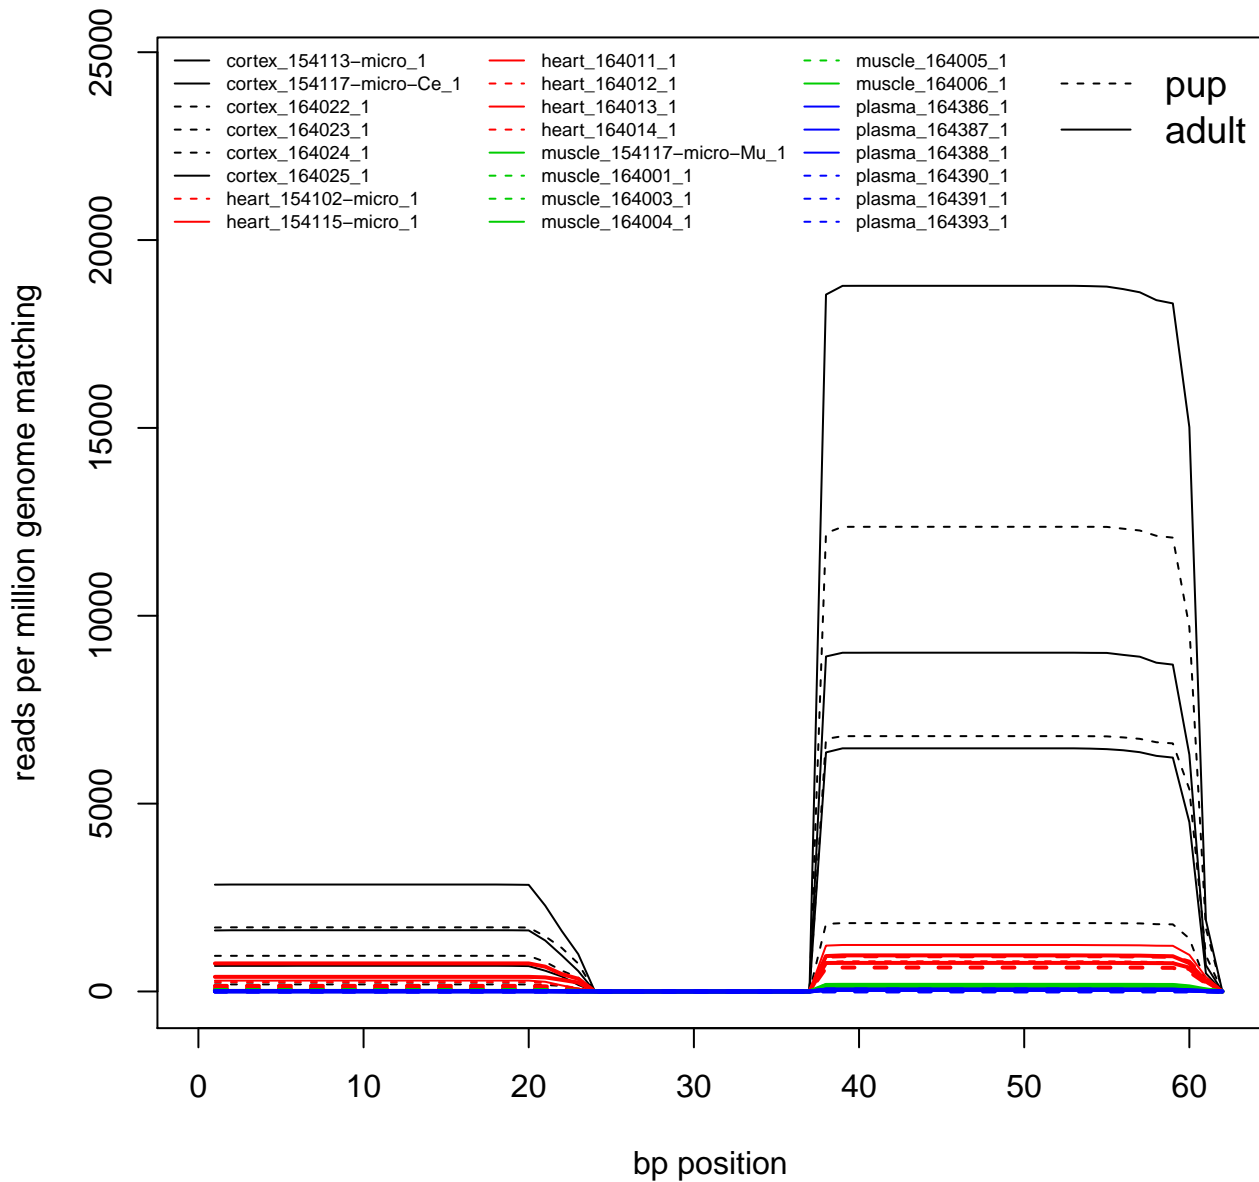



# lwe-miR-214;lwe-miR-3120\_loc1

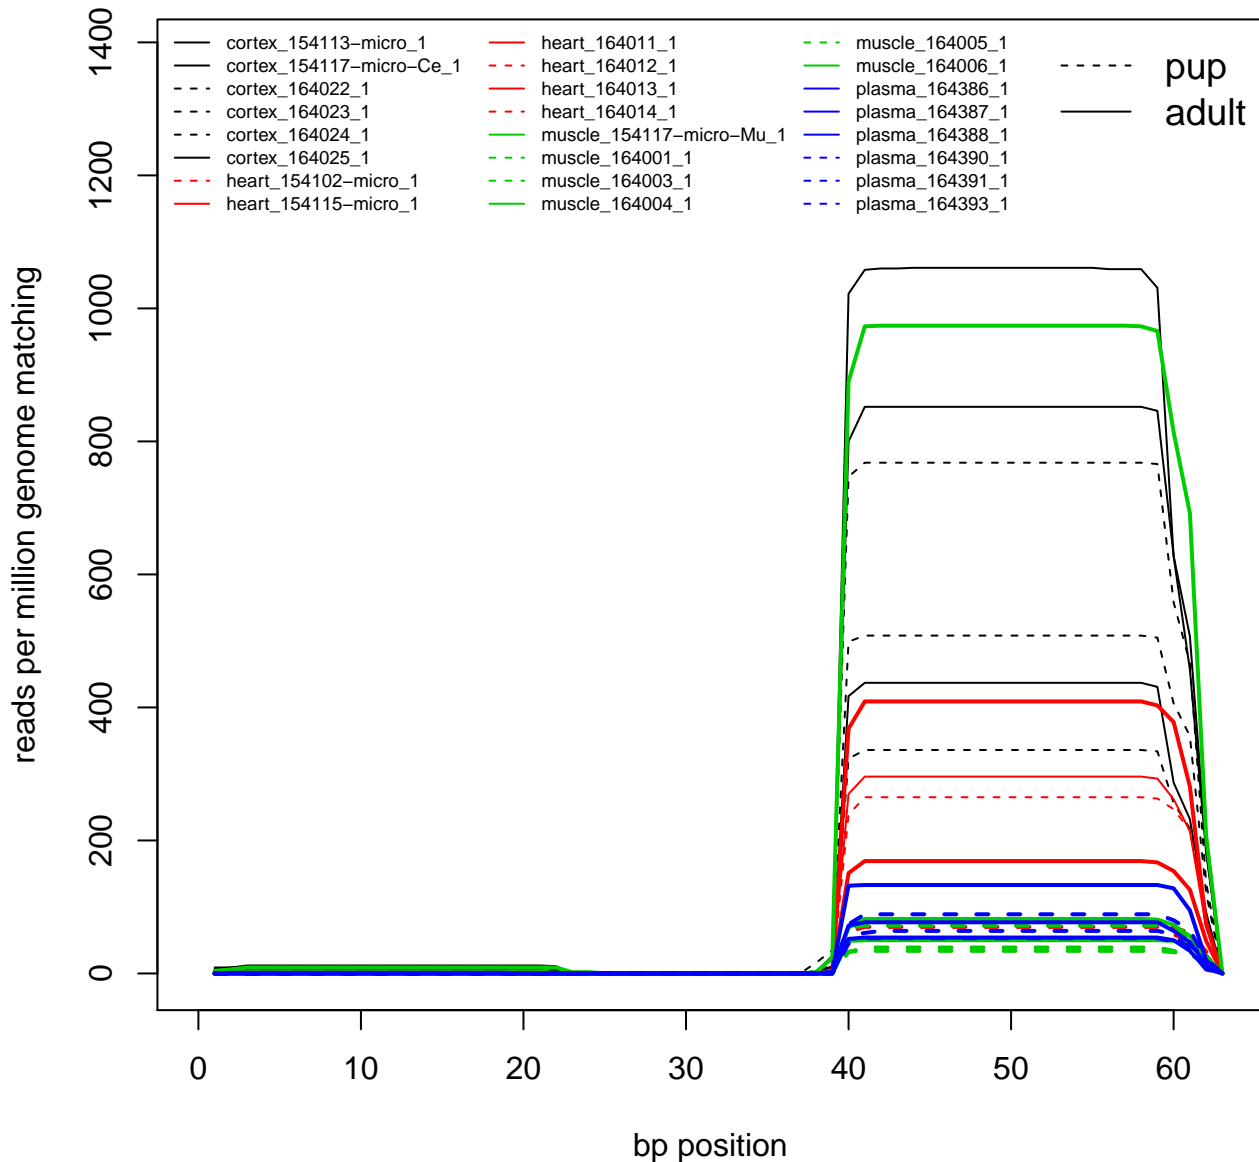

# lwe-miR-214\_miRDeep2\_loc1

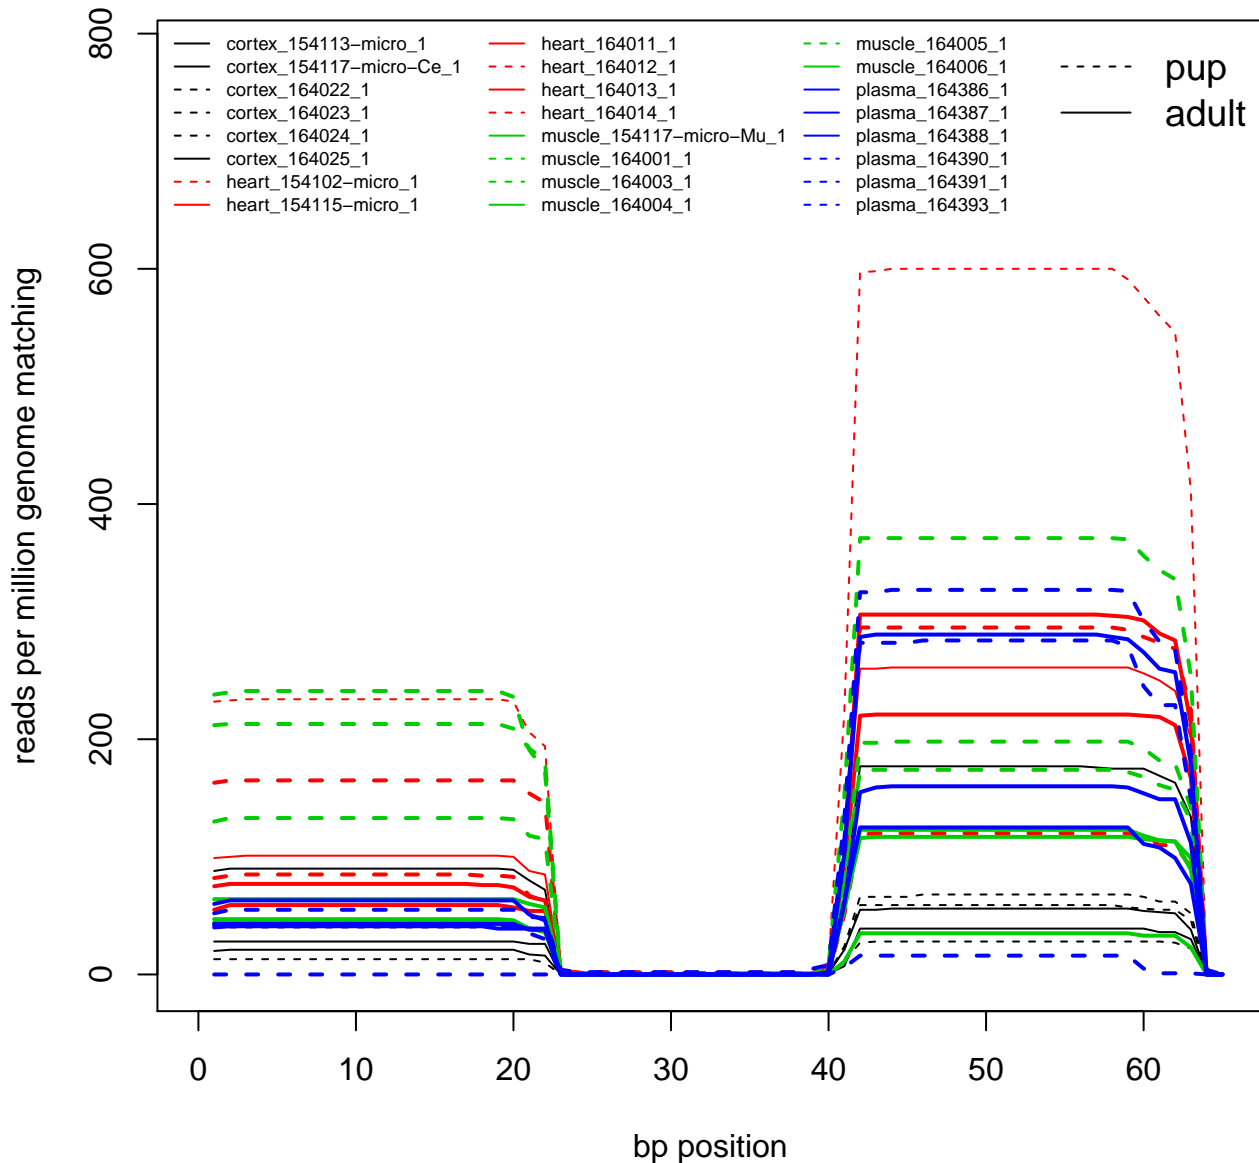

# WS\_miRDeep2\_novel\_48

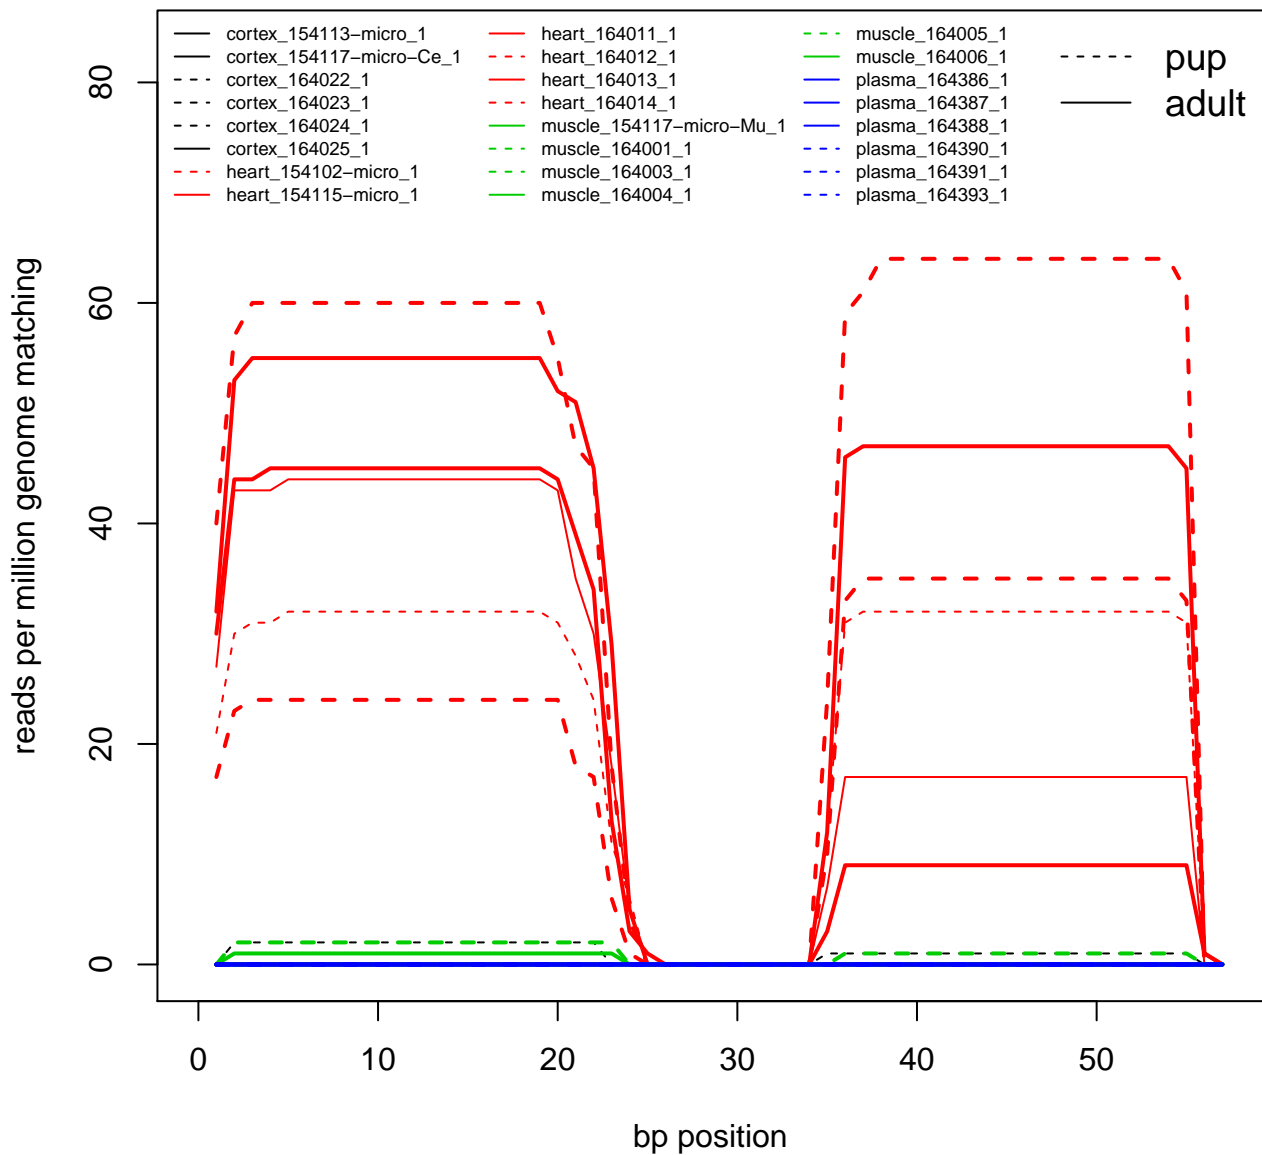

# WS\_miRDeep2\_novel\_49

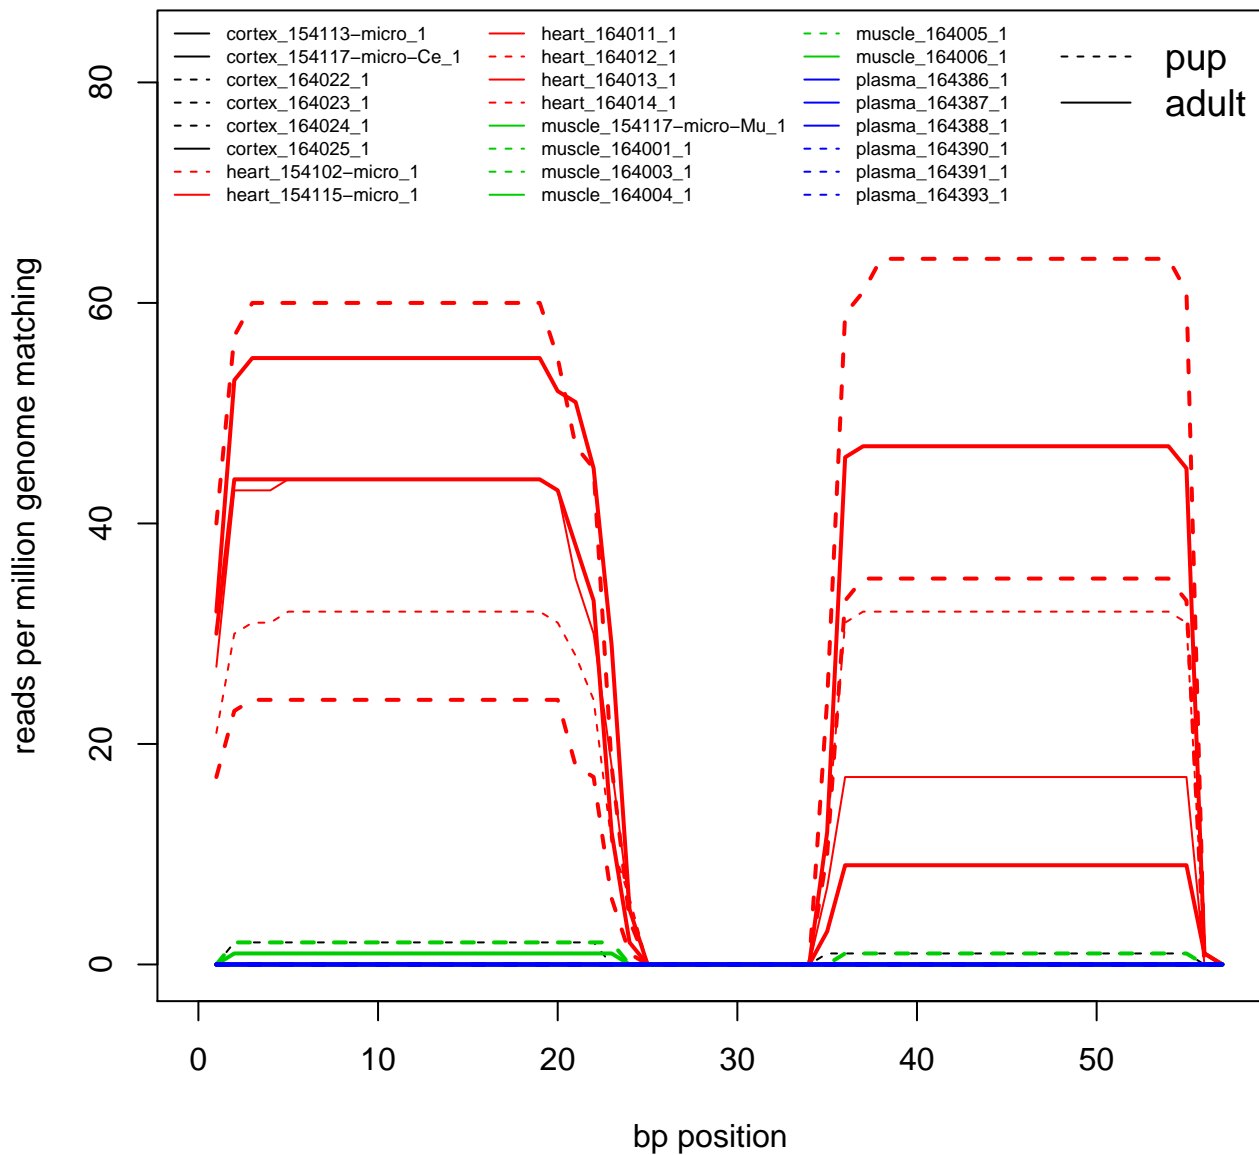



# WS\_miRDeep2\_novel\_50

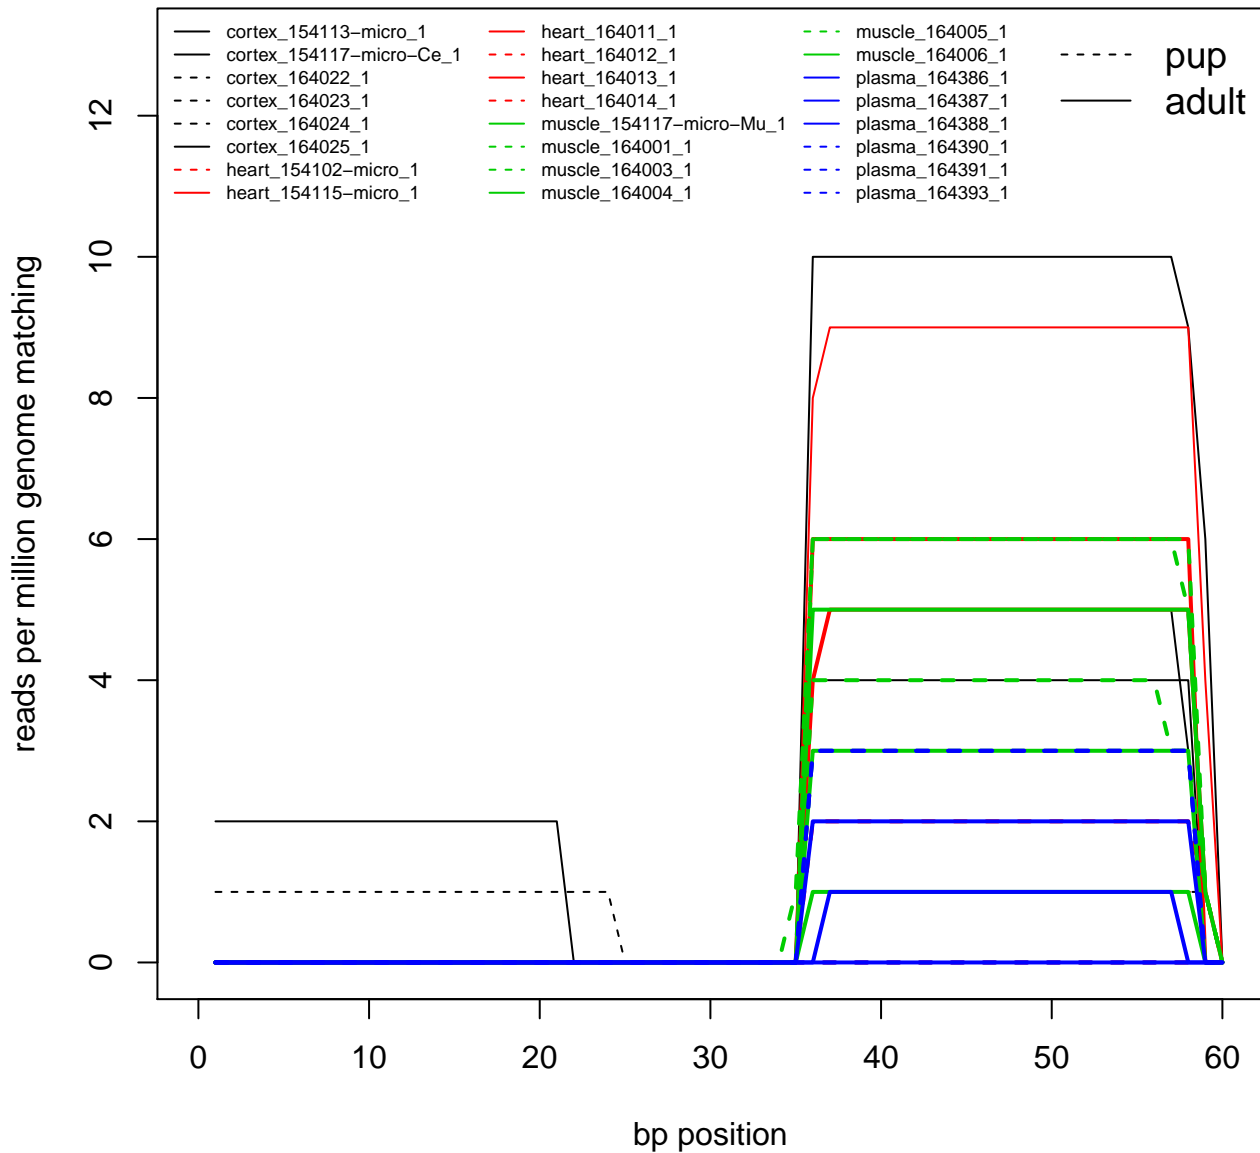

# lwe-miR-219c\_loc1

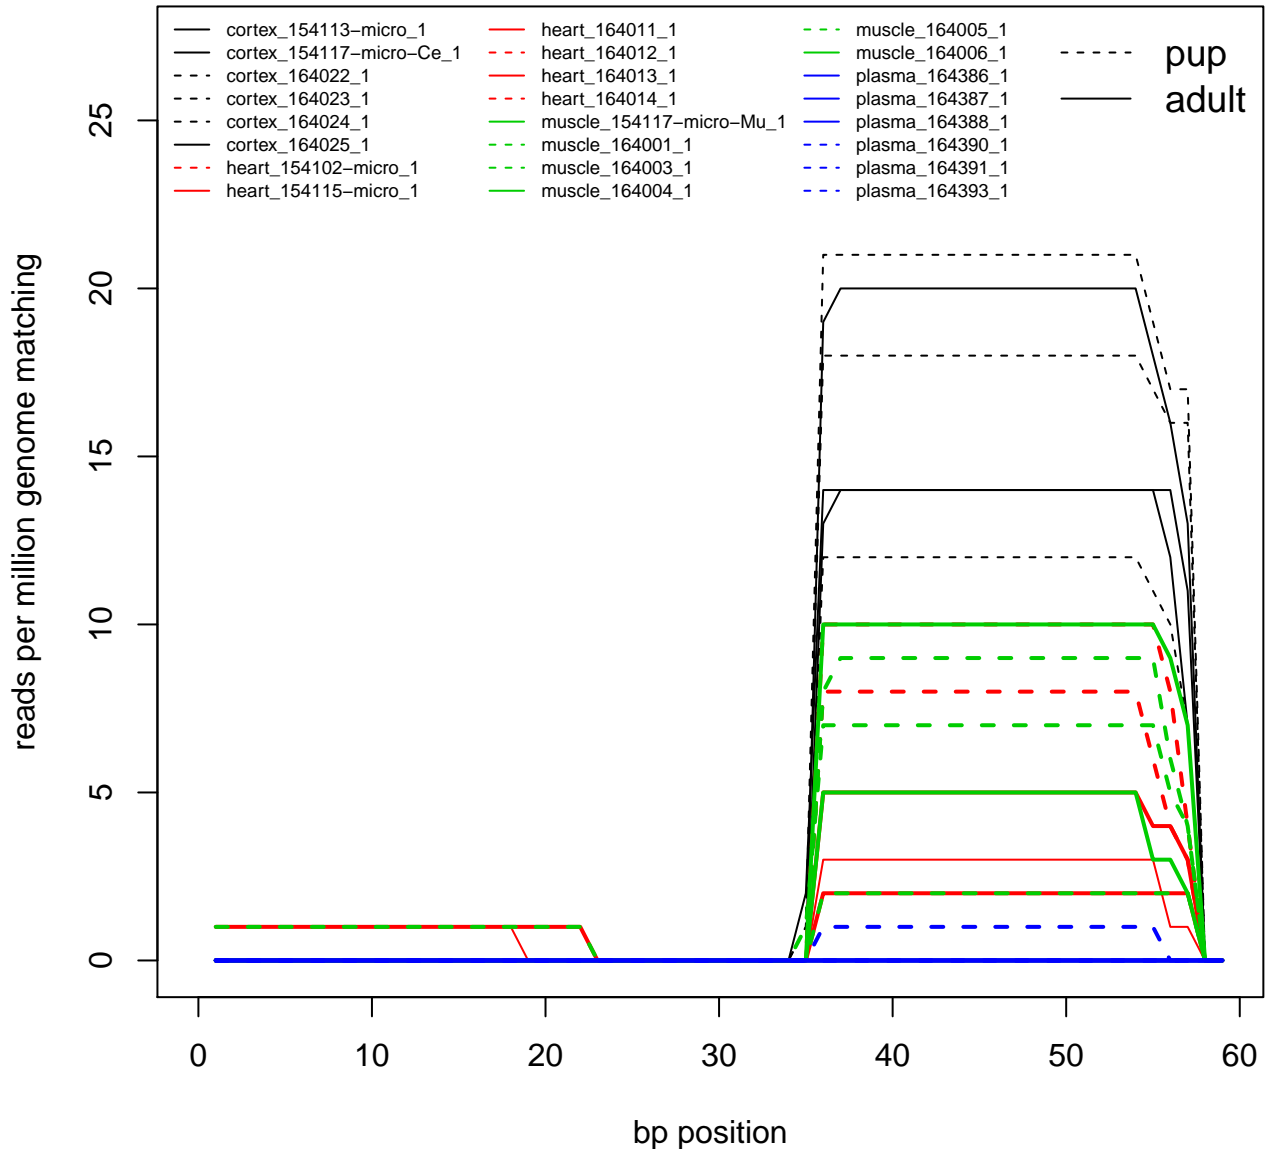

# WS\_miRDeep2\_novel\_52

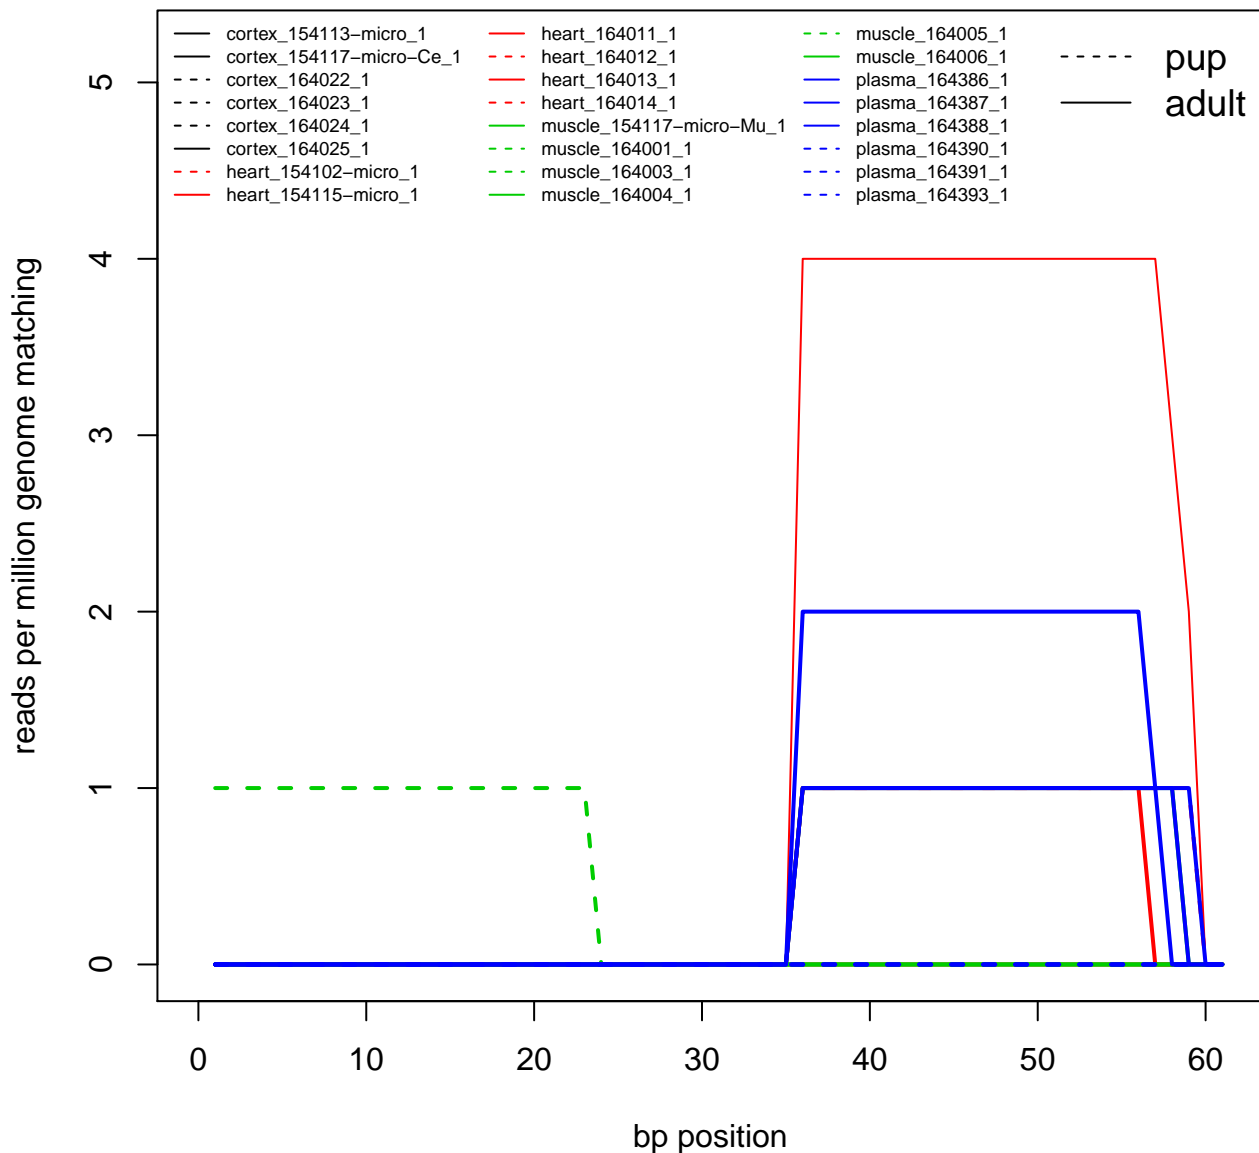

# WS\_miRDeep2\_novel\_53

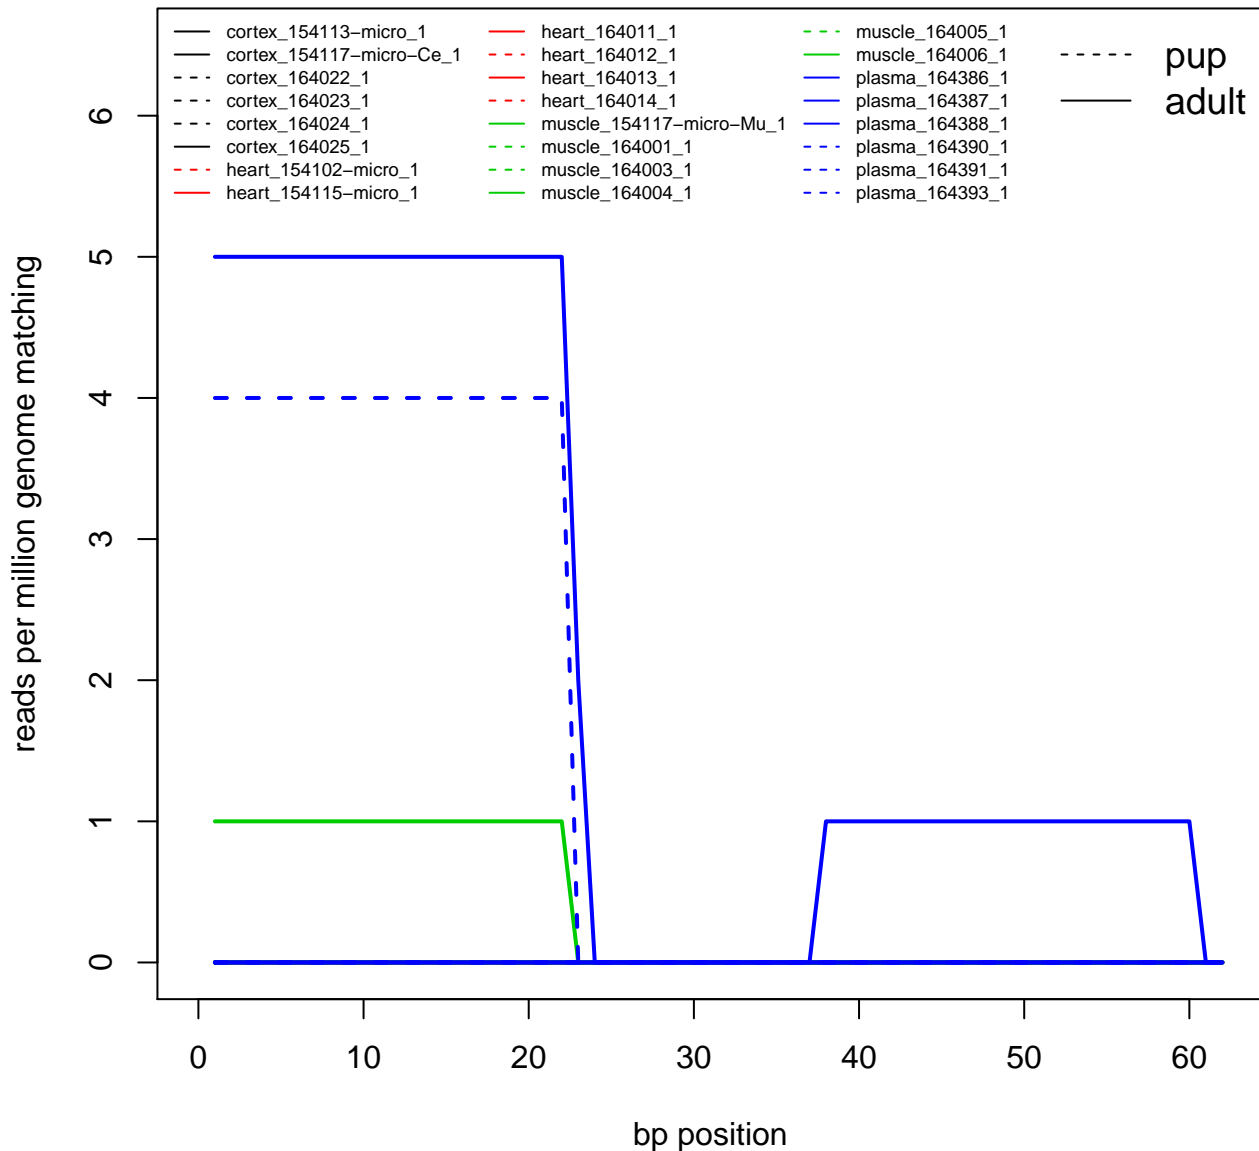

# WS\_miRDeep2\_novel\_54

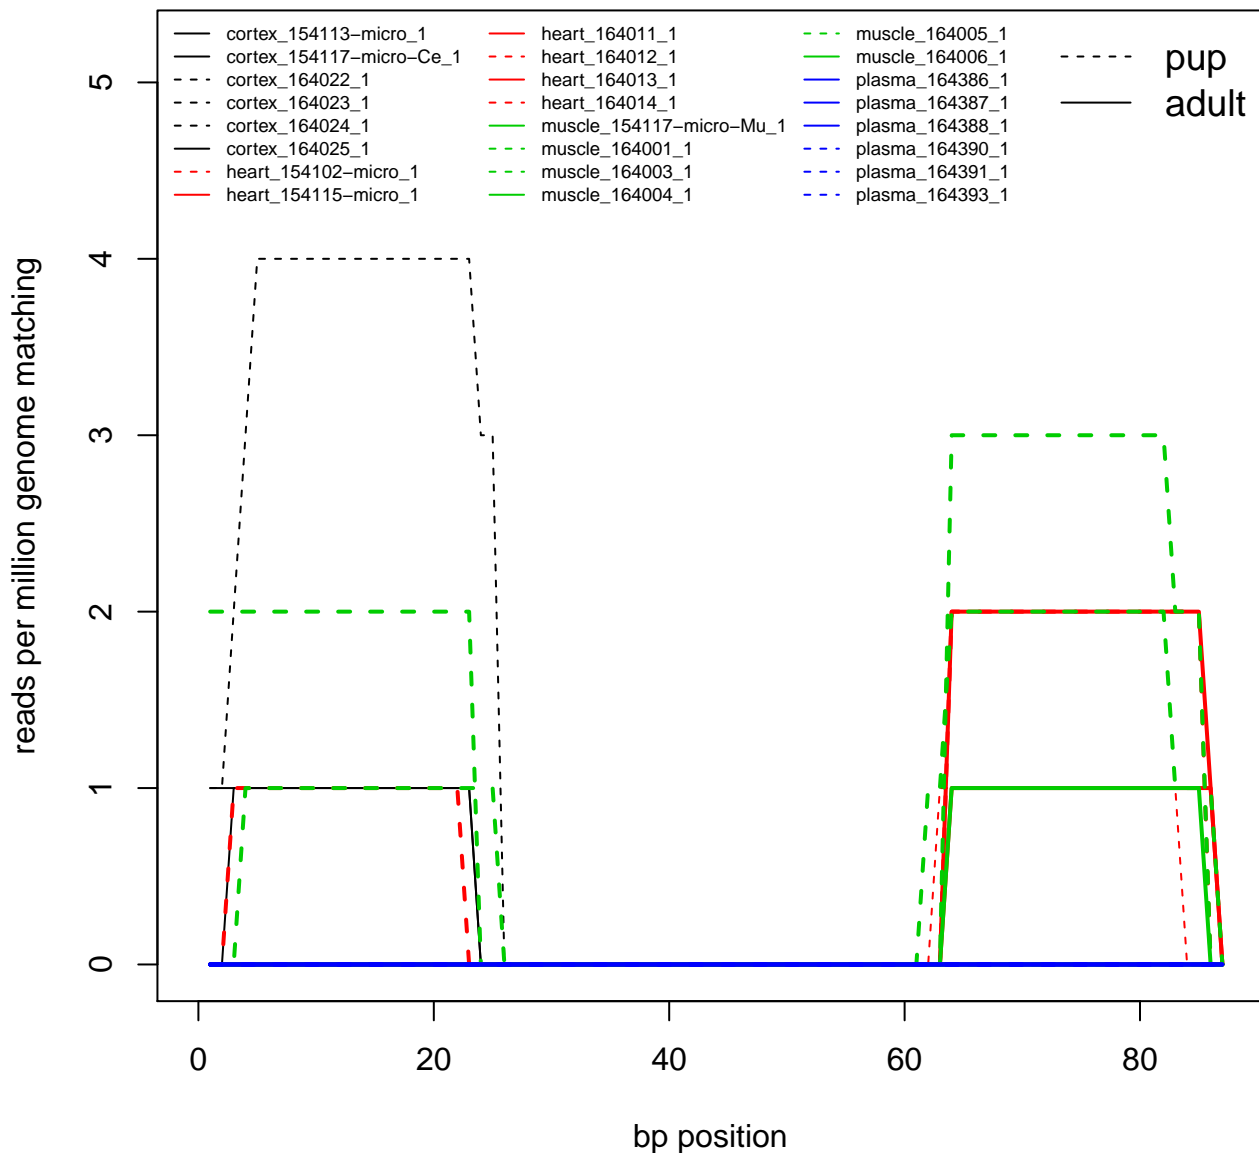

# WS\_miRDeep2\_novel\_55

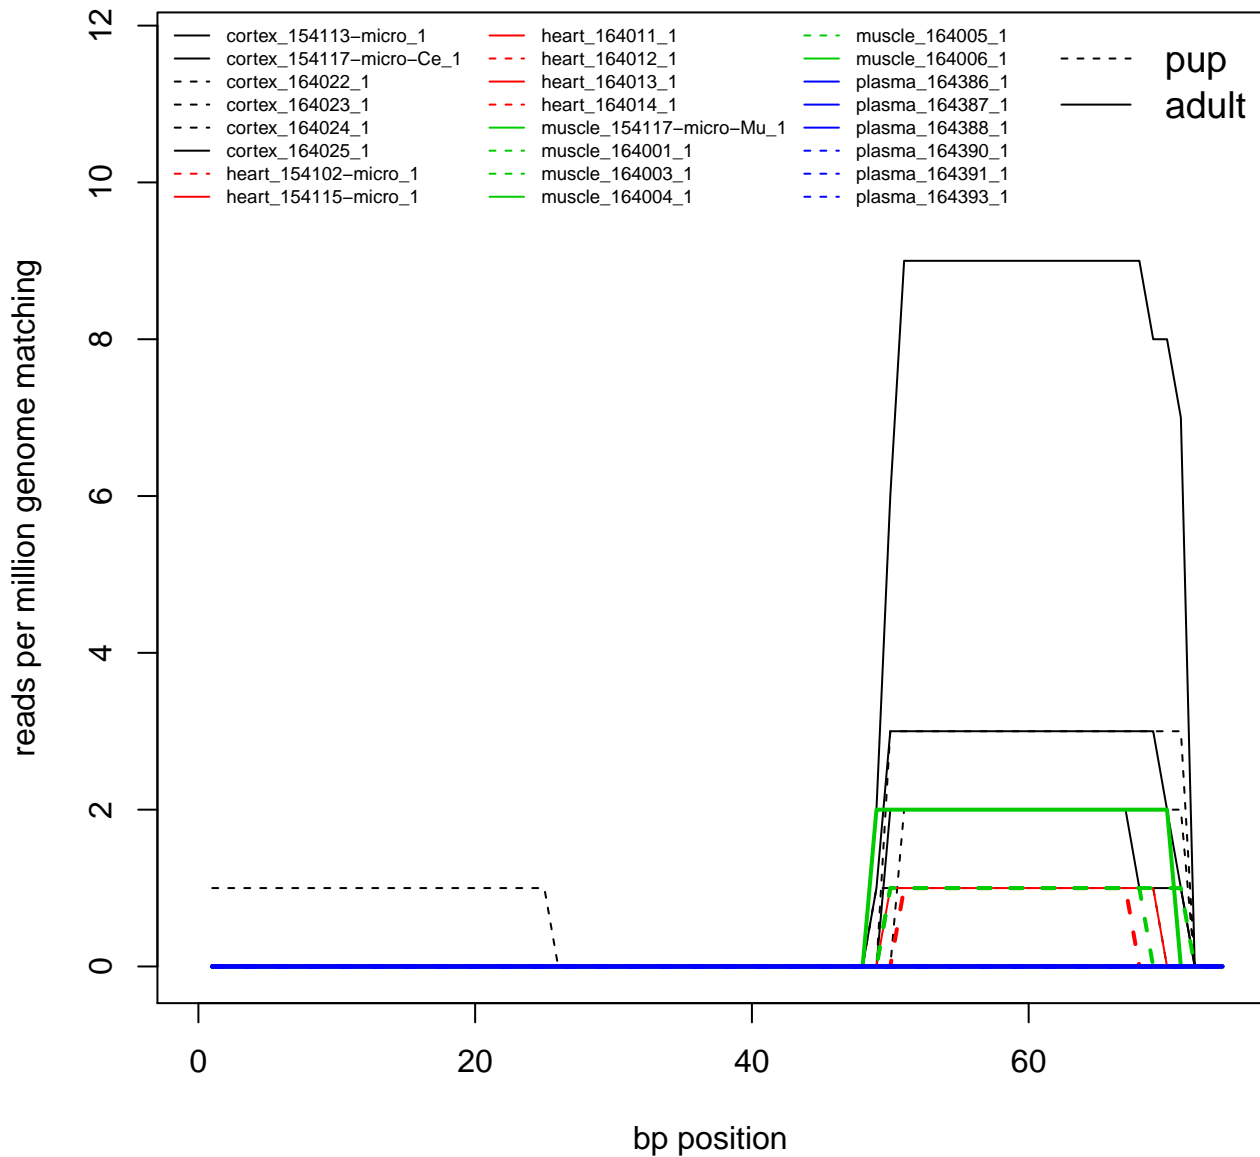

# lwe-miR-1839\_miRDeep2\_loc1

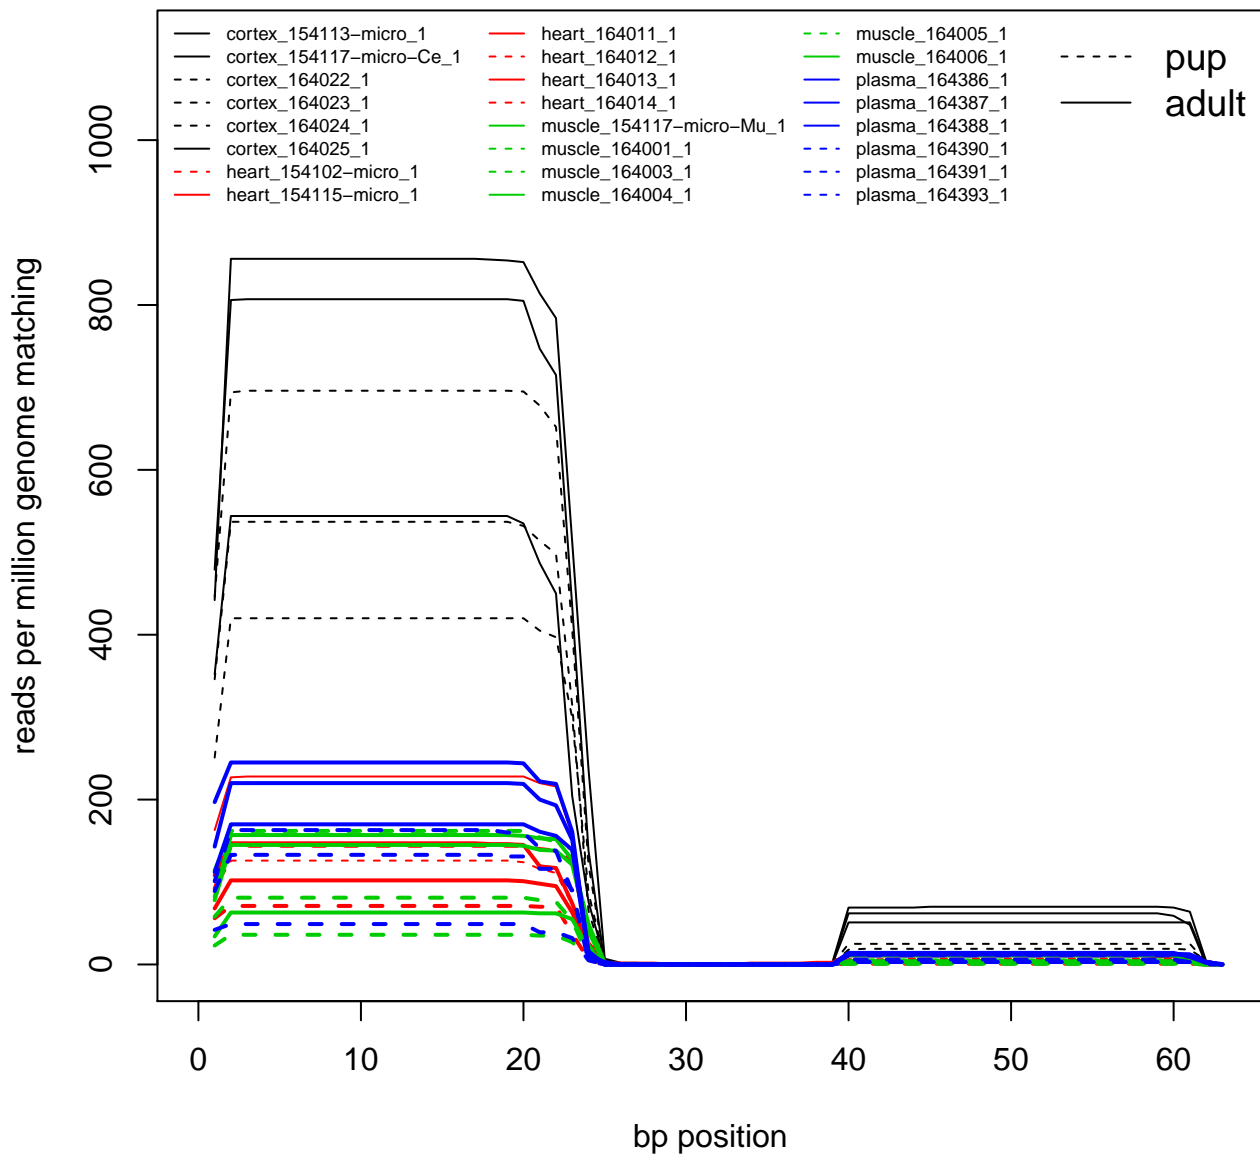

# WS\_miRDeep2\_novel\_56

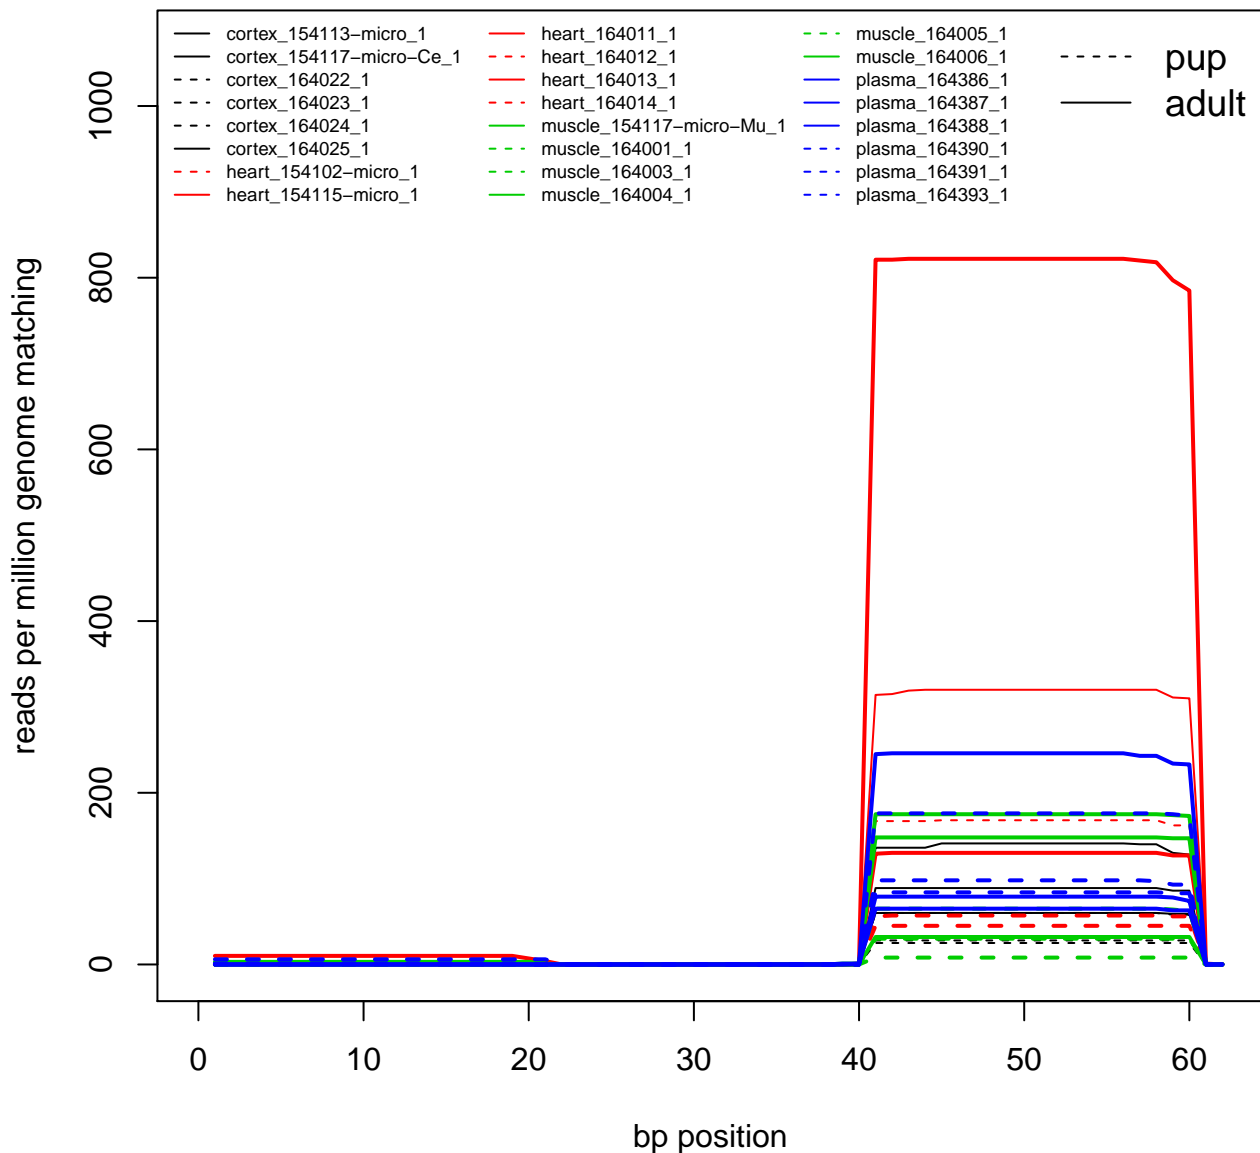



# WS\_miRDeep2\_novel\_57

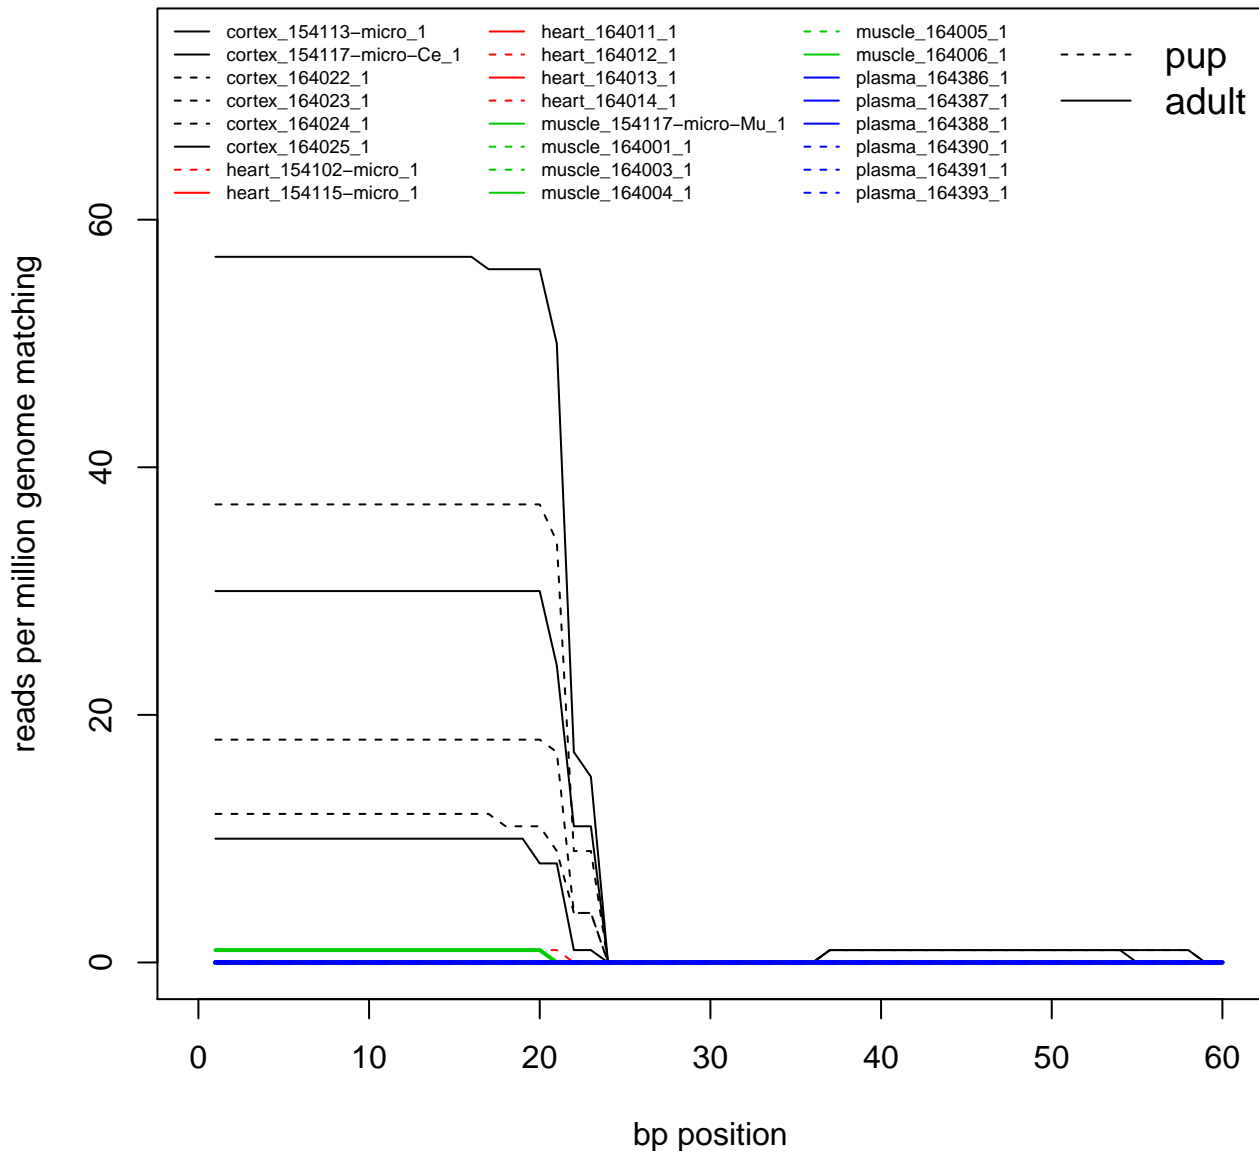

# WS\_miRDeep2\_novel\_58

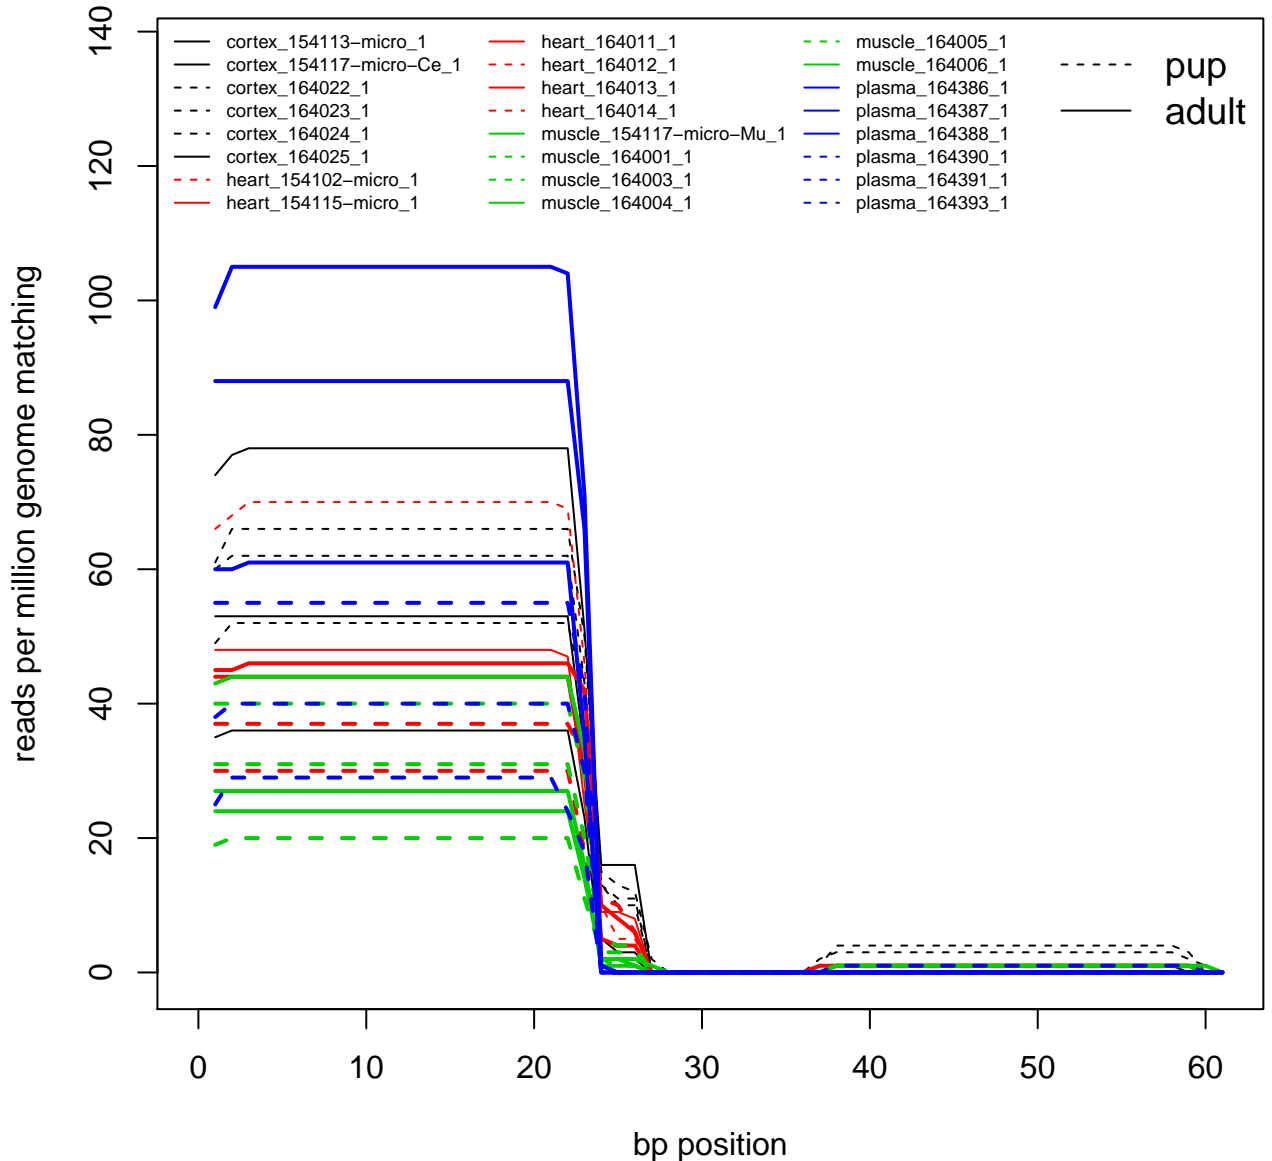

# lwe-miR-30a\_miRDeep2\_loc1

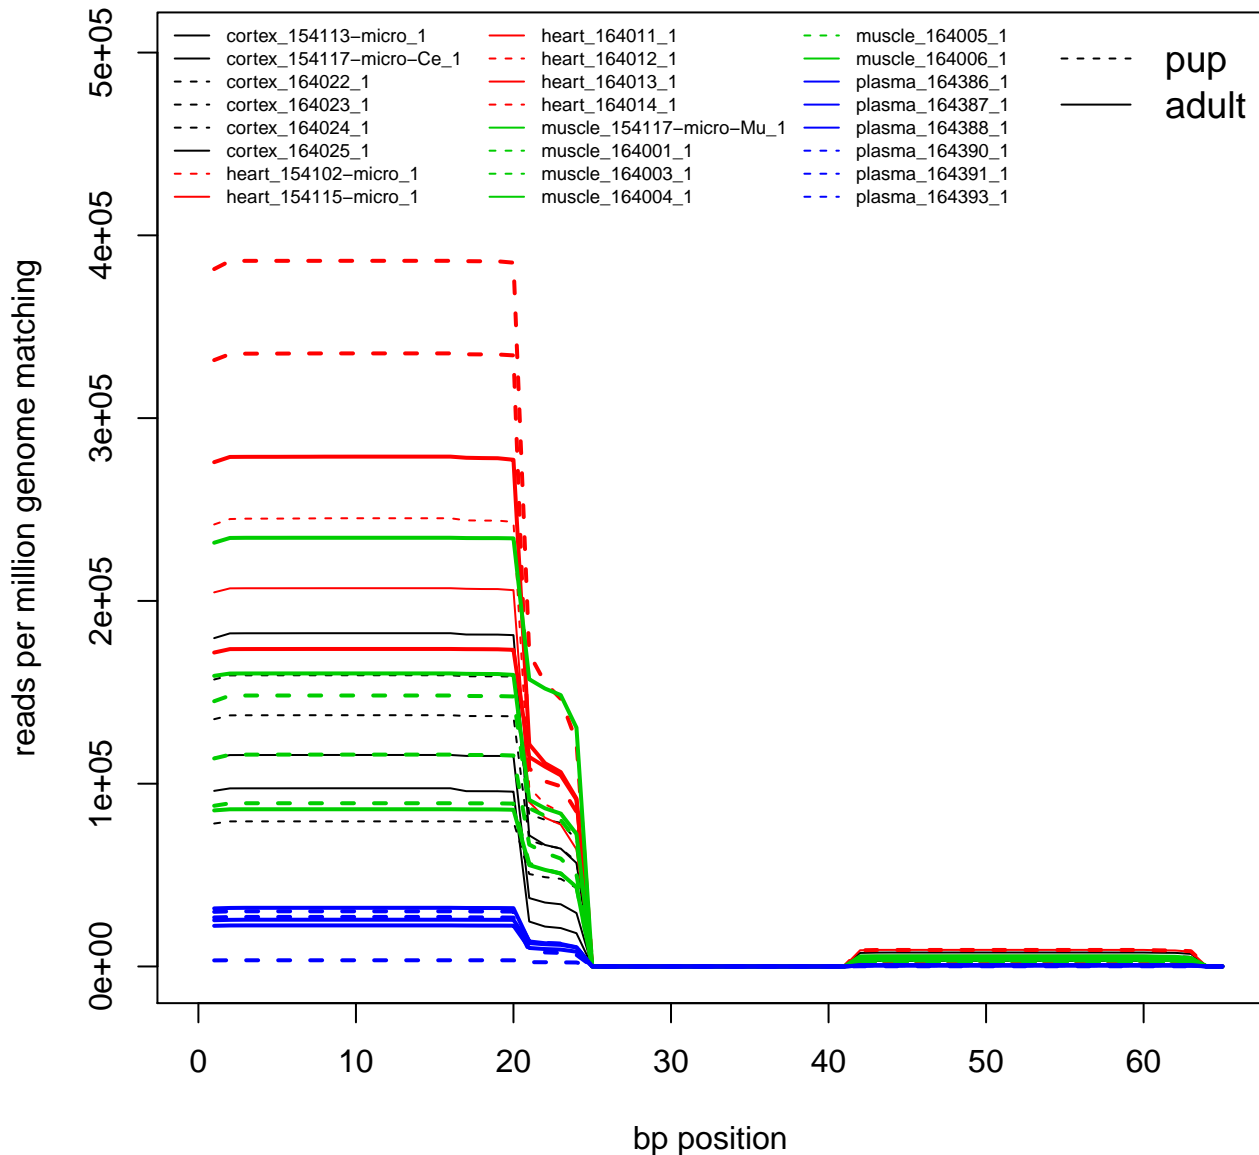

# lwe-miR-30c\_miRDeep2\_loc1

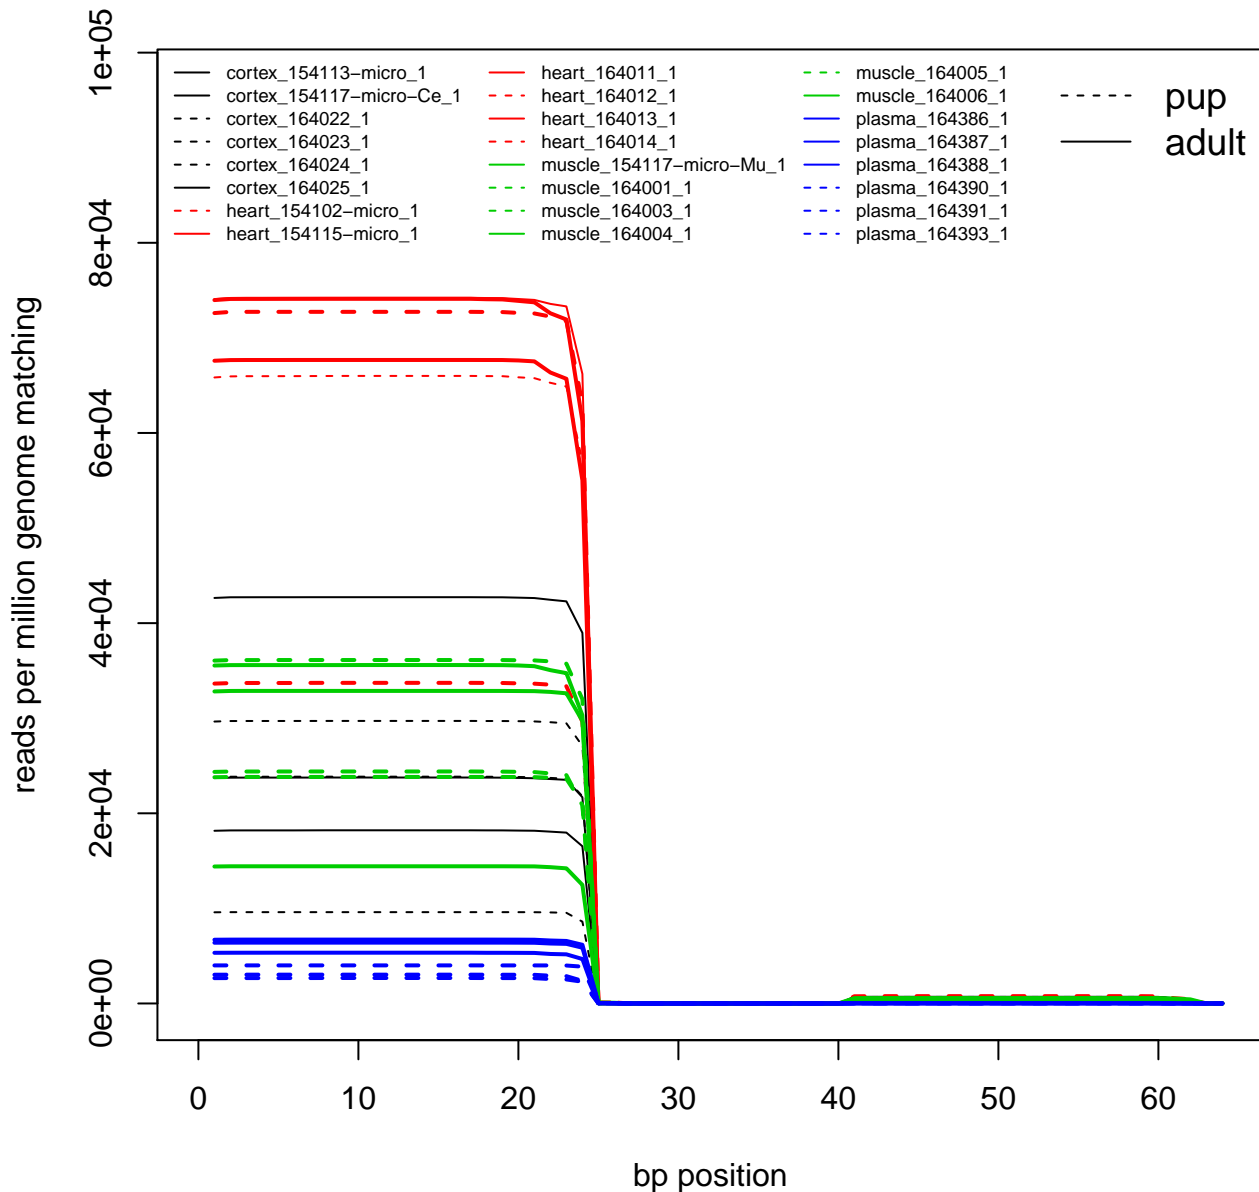

# WS\_miRDeep2\_novel\_59

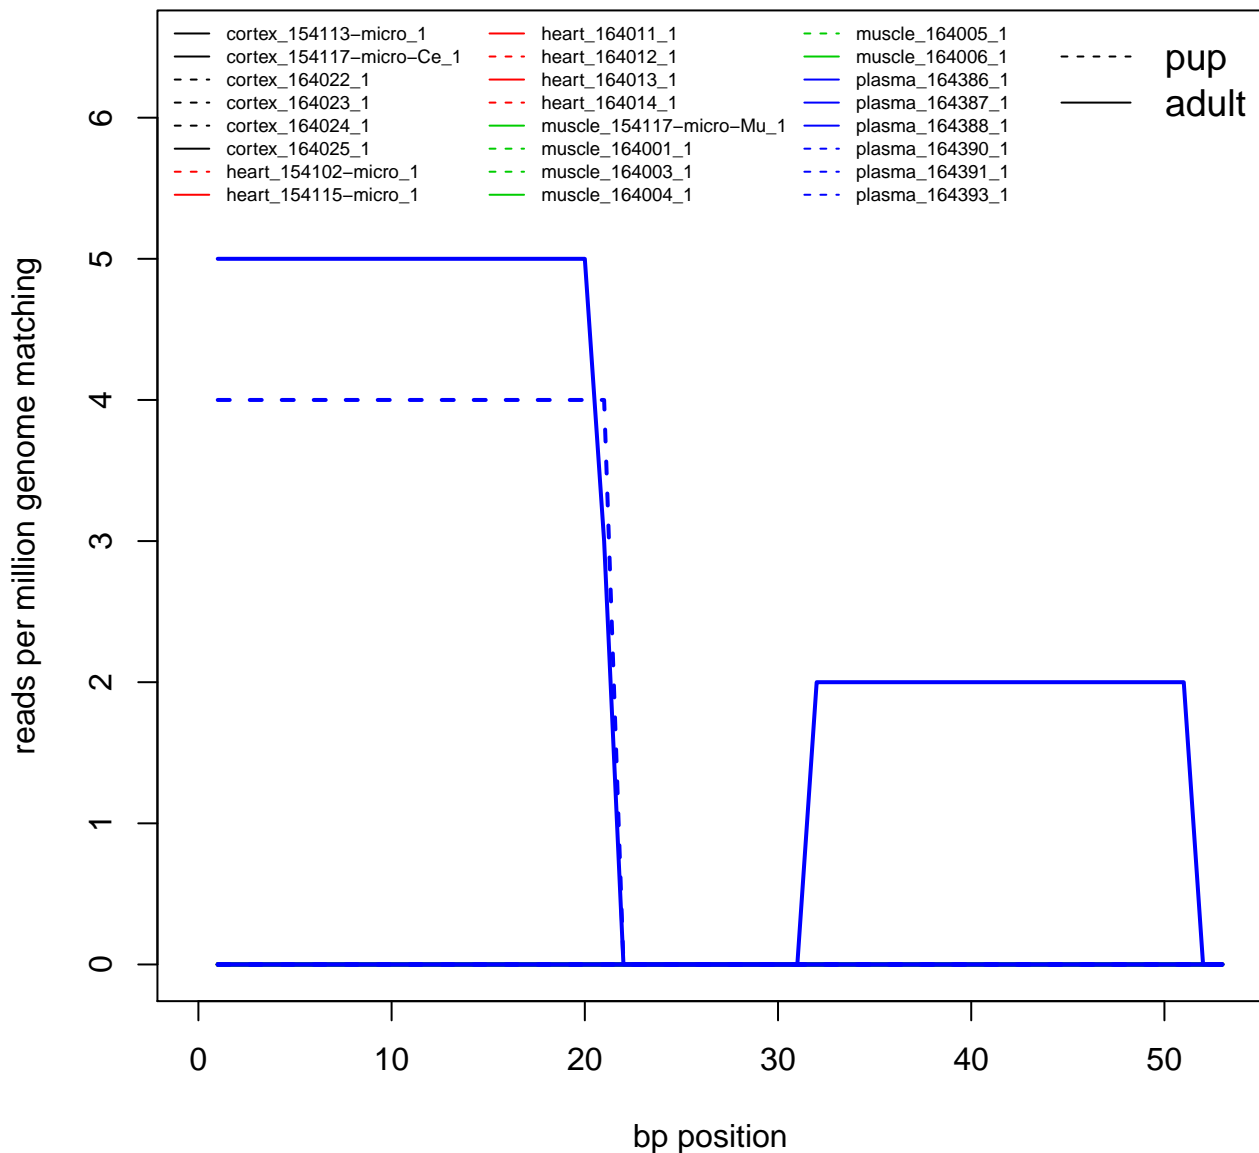

# WS\_miRDeep2\_novel\_60

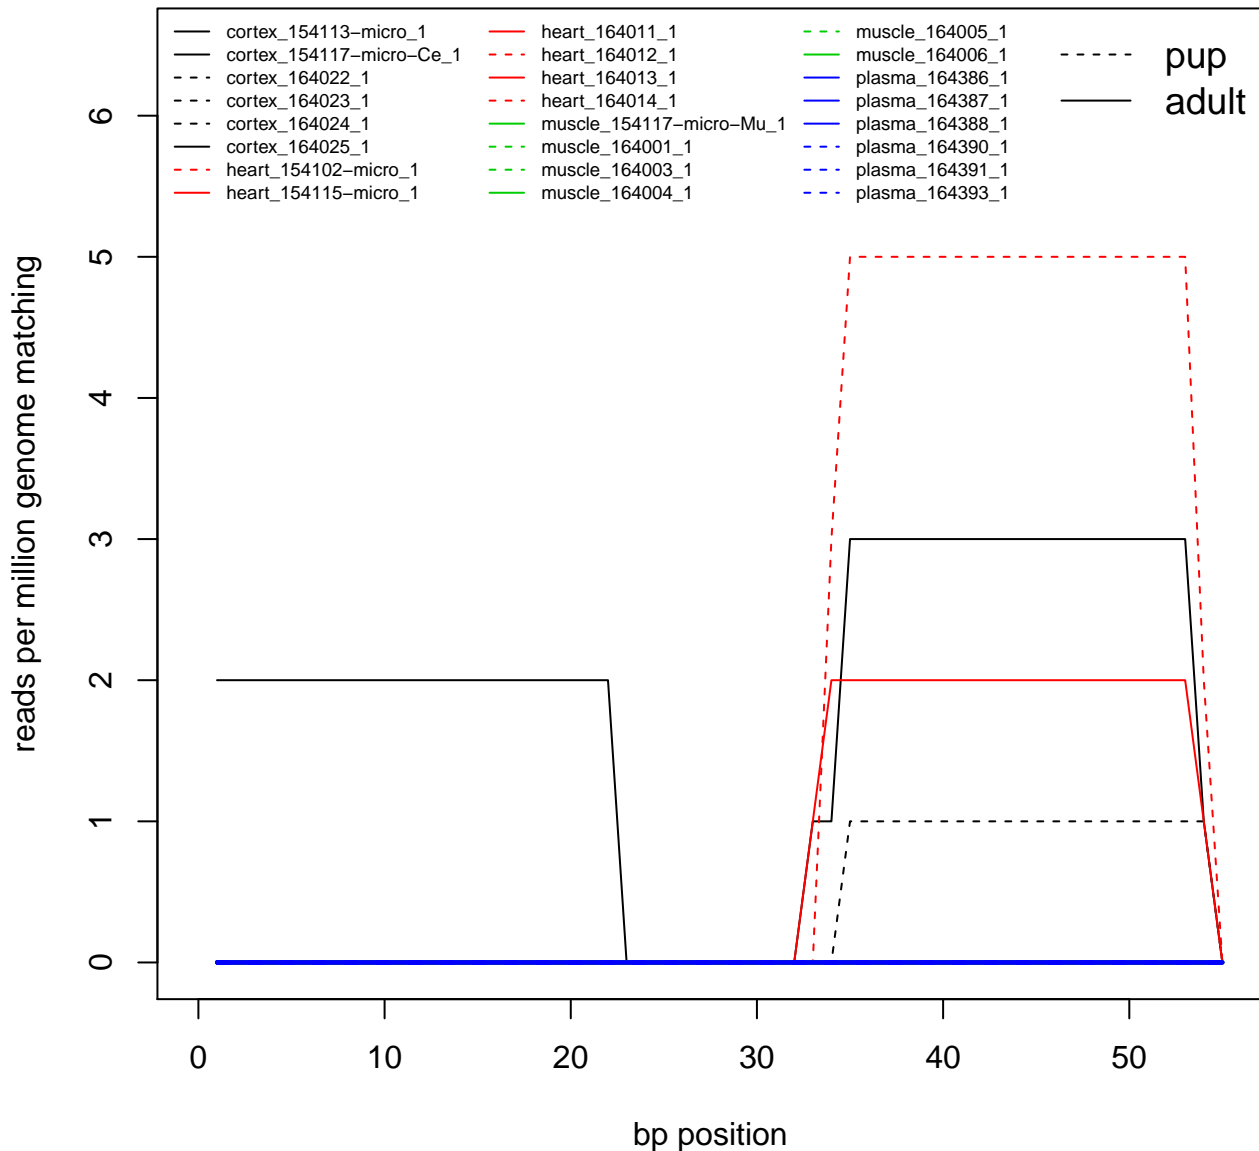

# WS\_miRDeep2\_novel\_61

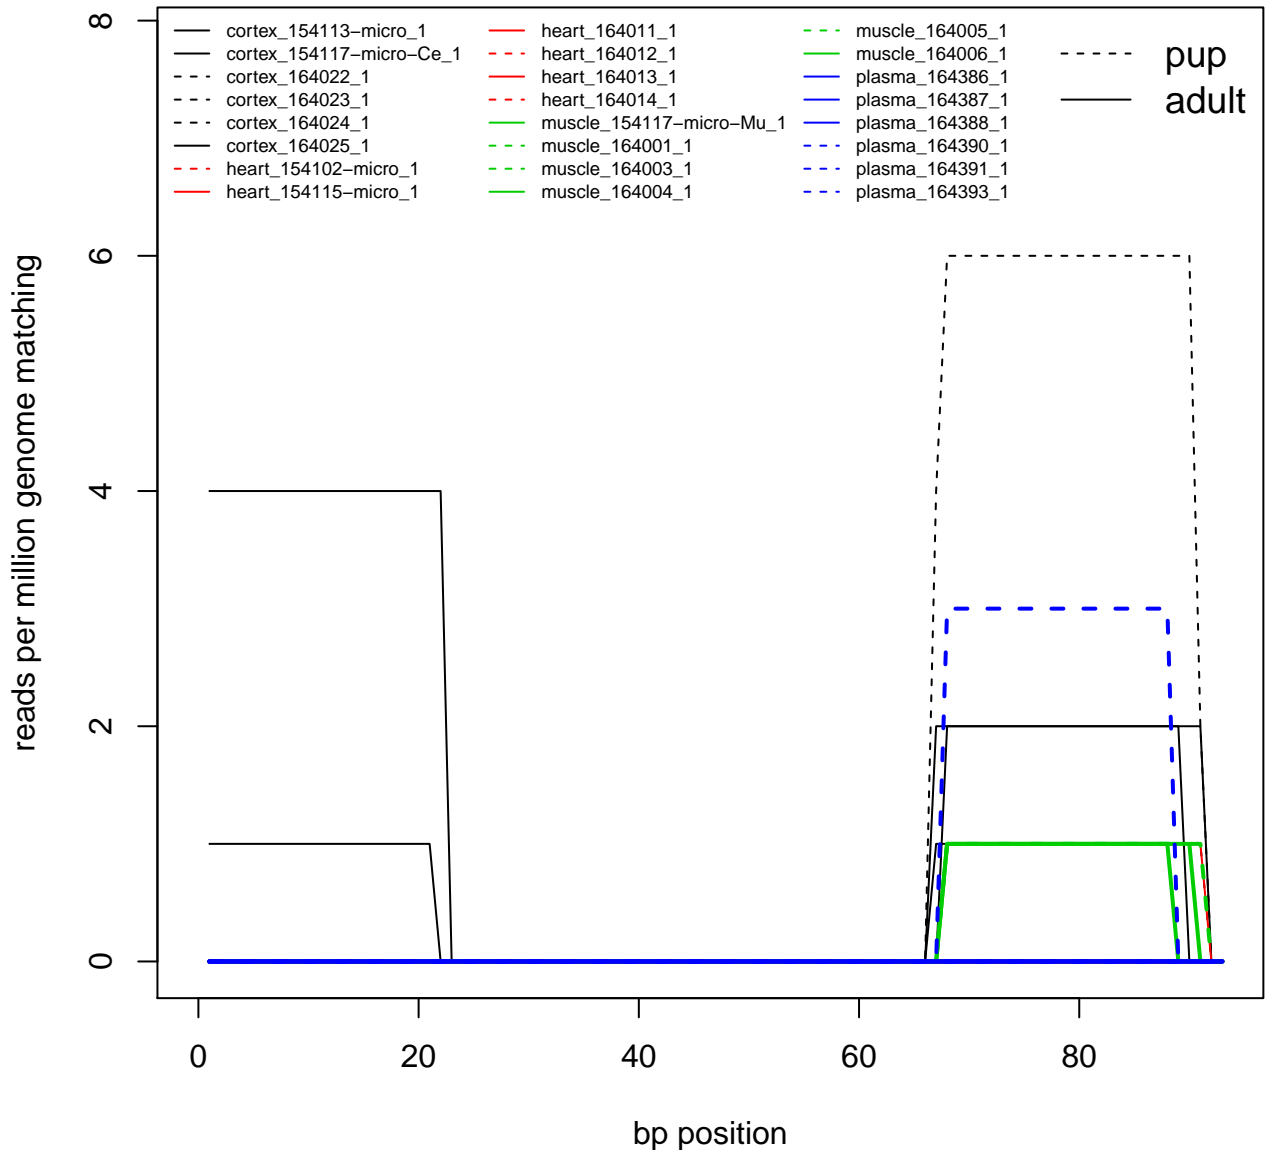

# lwe-miR-7\_miRDeep2\_loc1

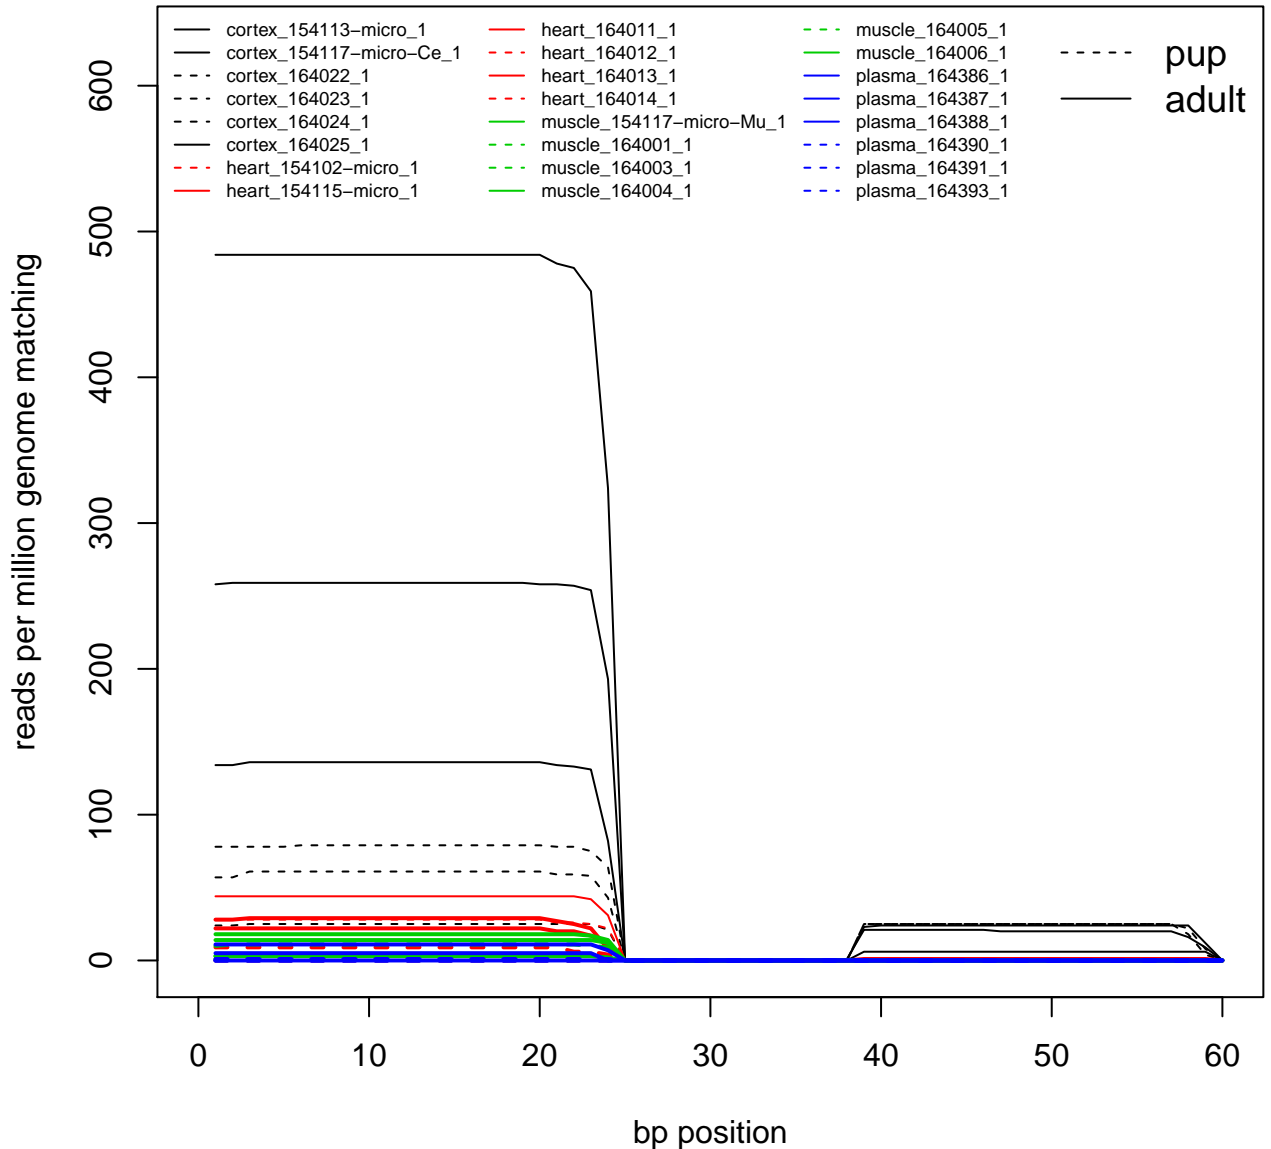



# WS\_miRDeep2\_novel\_62

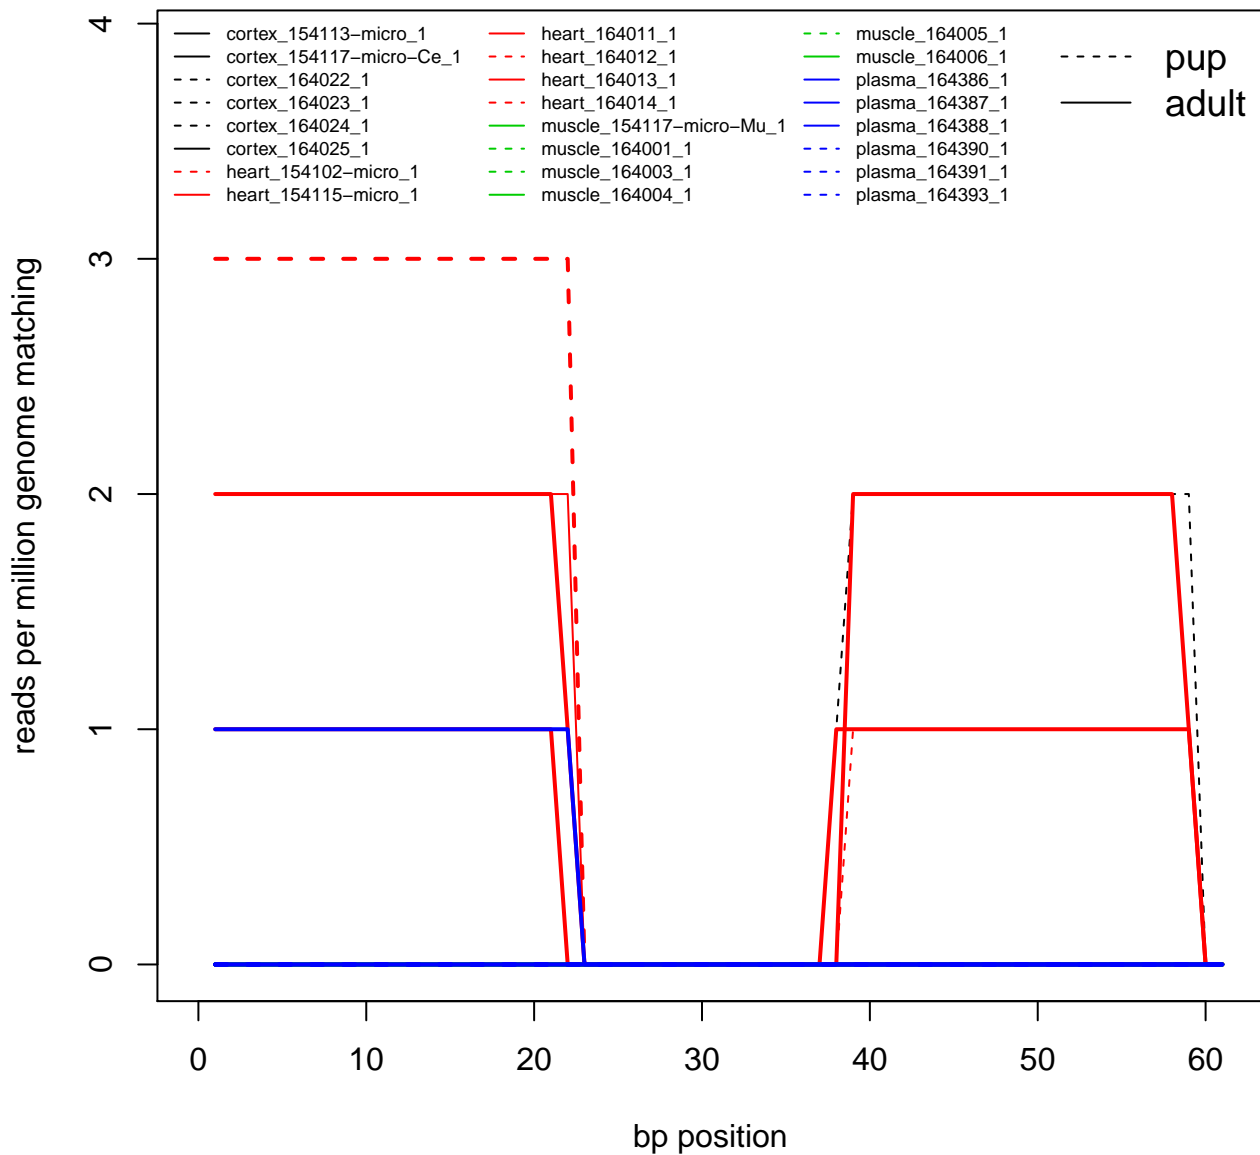

# WS\_miRDeep2\_novel\_63

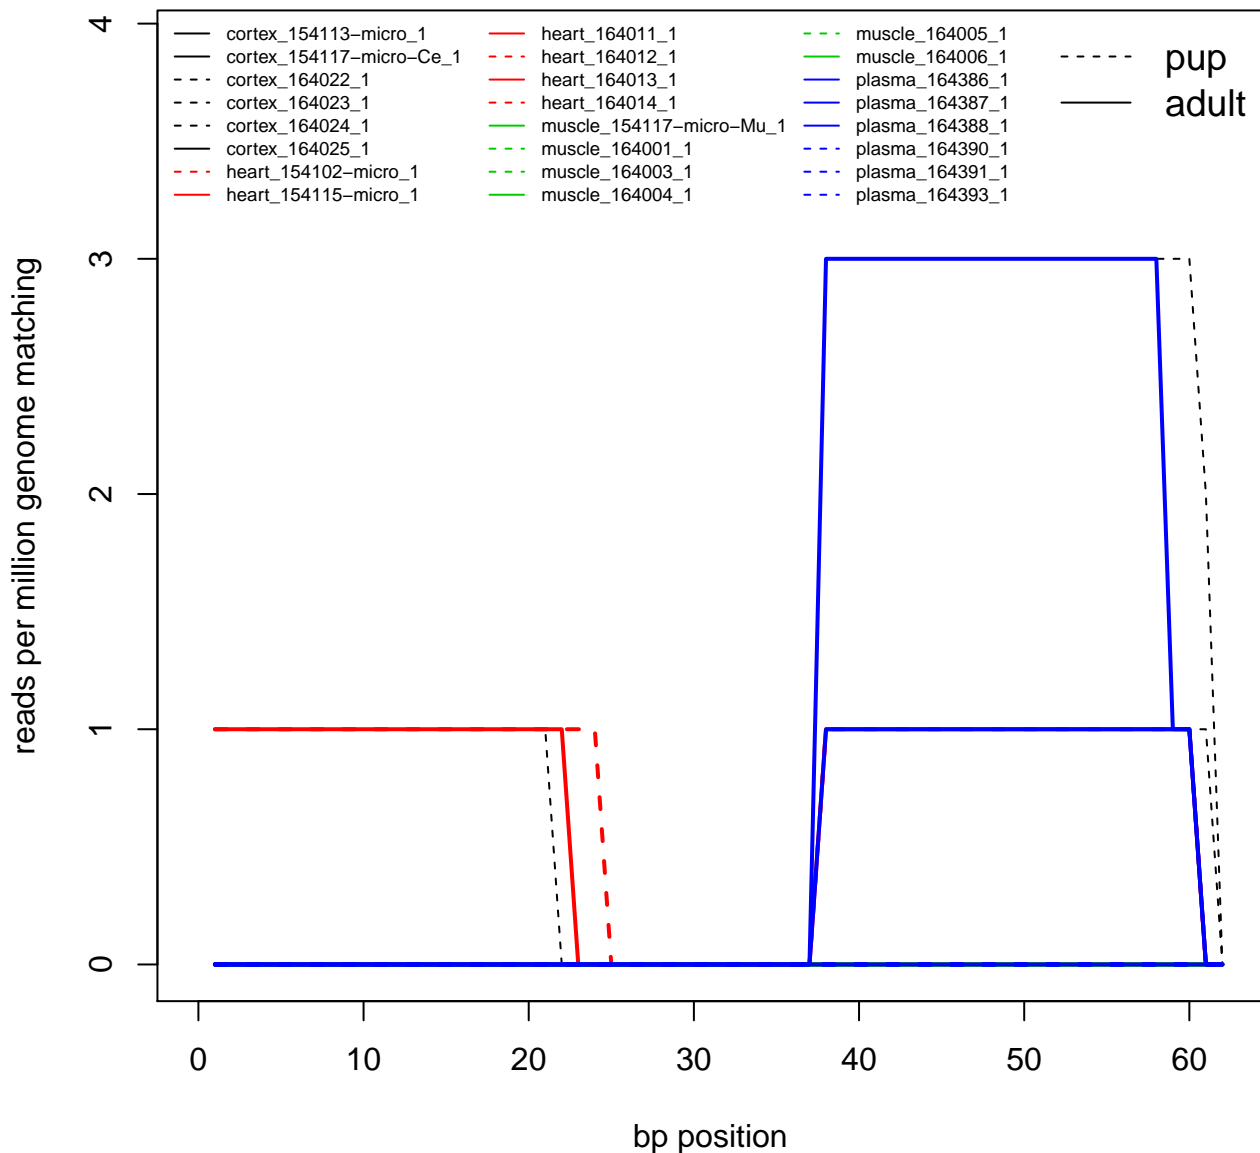

# WS\_miRDeep2\_novel\_64

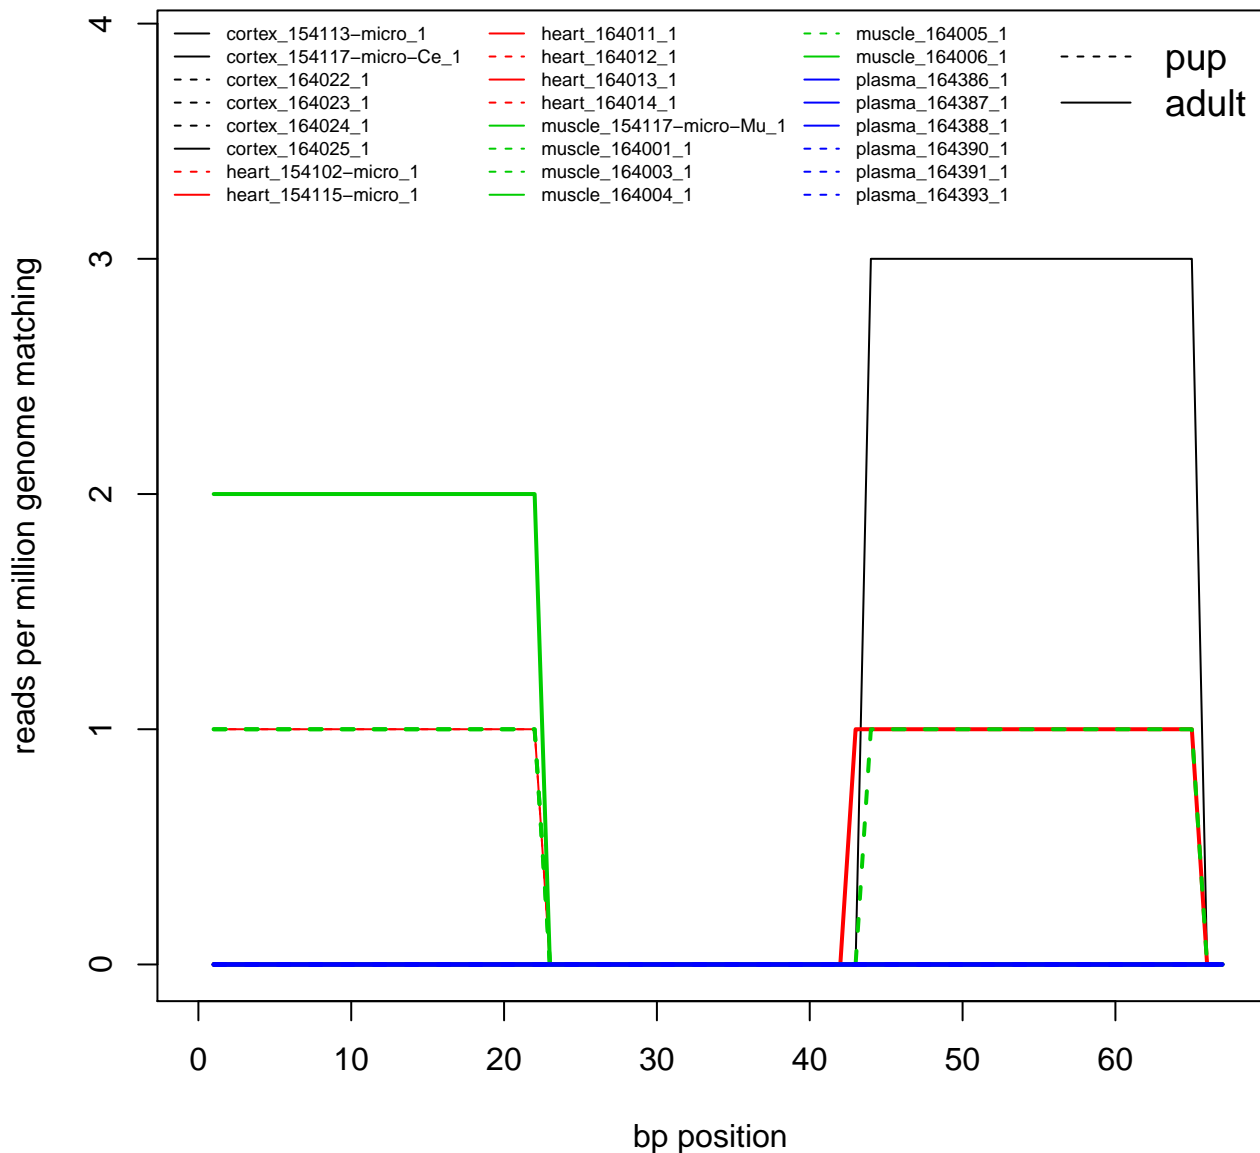

# WS\_miRDeep2\_novel\_65

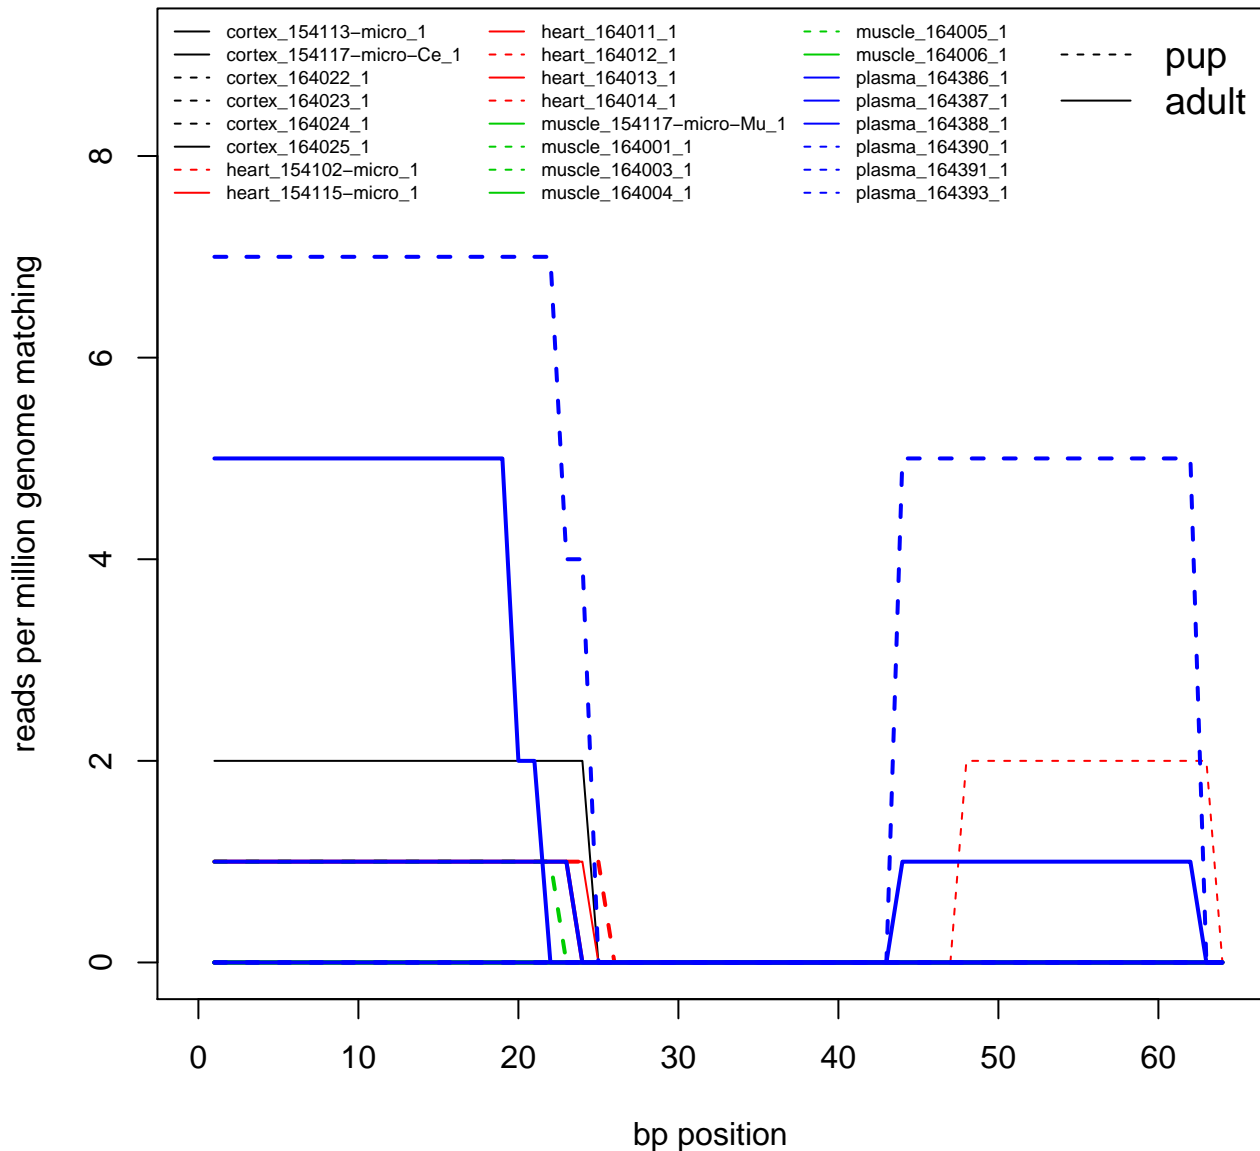

# WS\_miRDeep2\_novel\_66

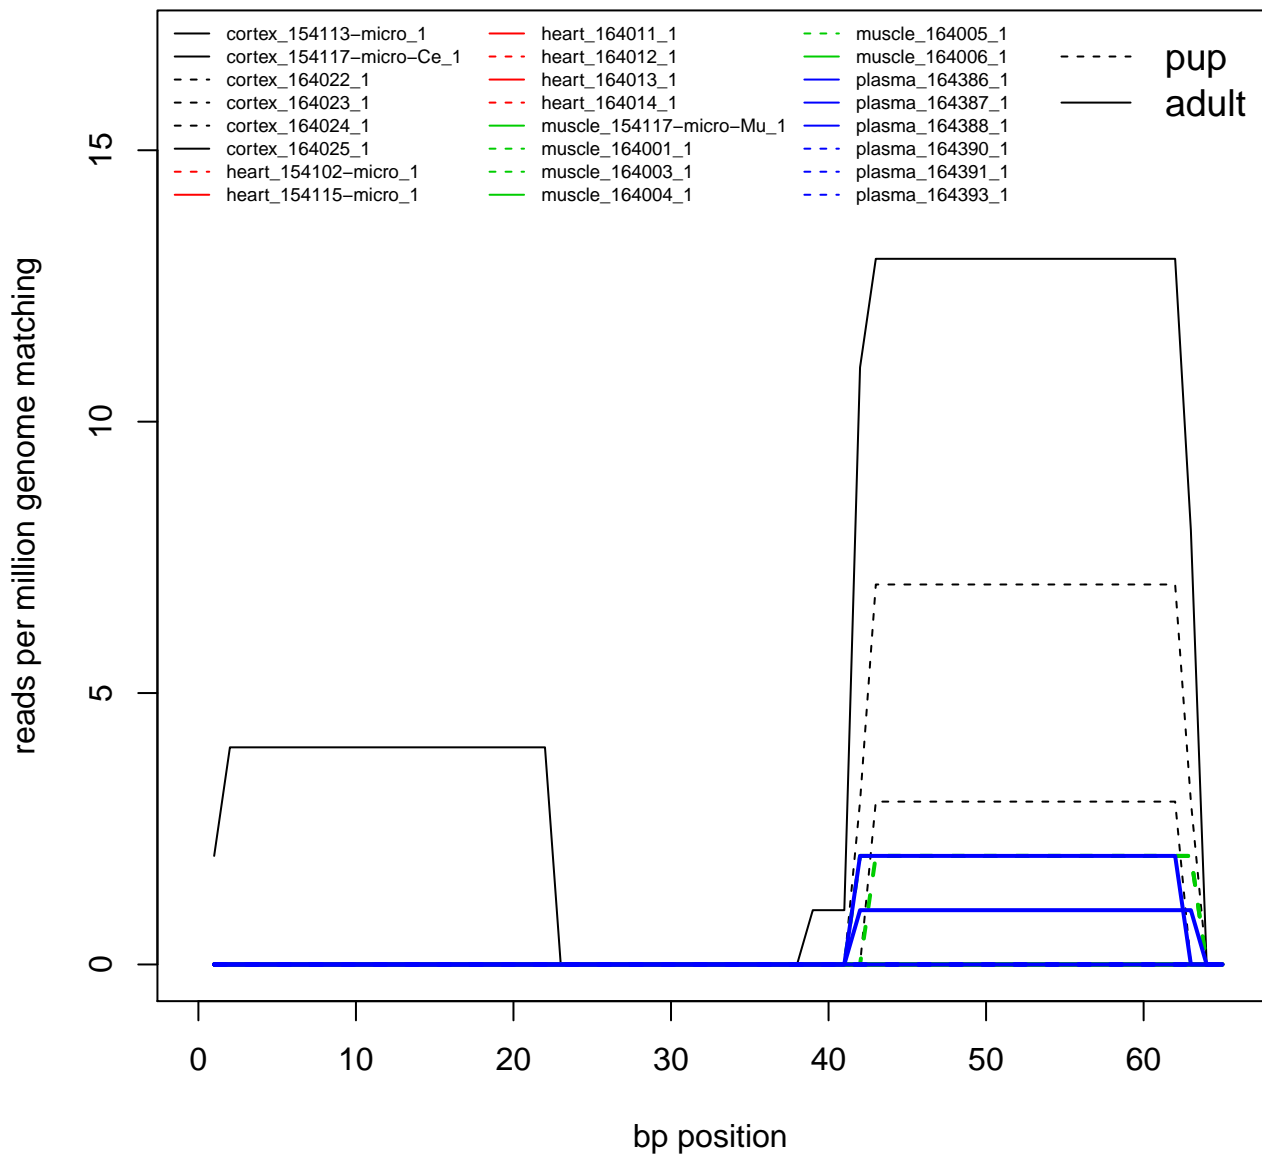

# lwe-miR-6516\_miRDeep2\_loc1

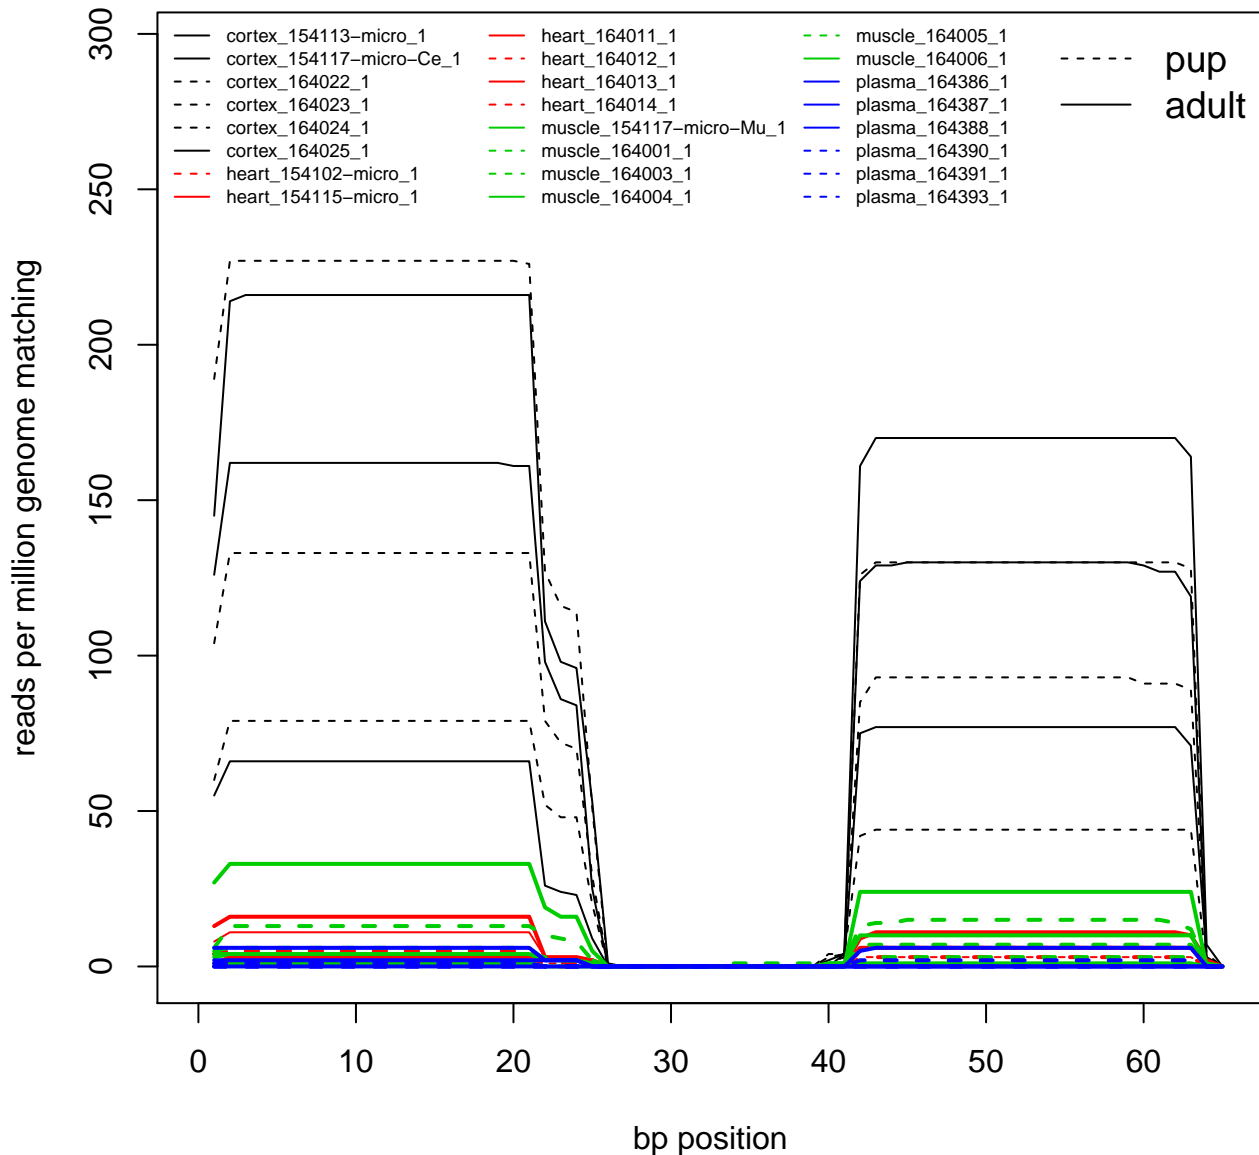

# WS\_miRDeep2\_novel\_67

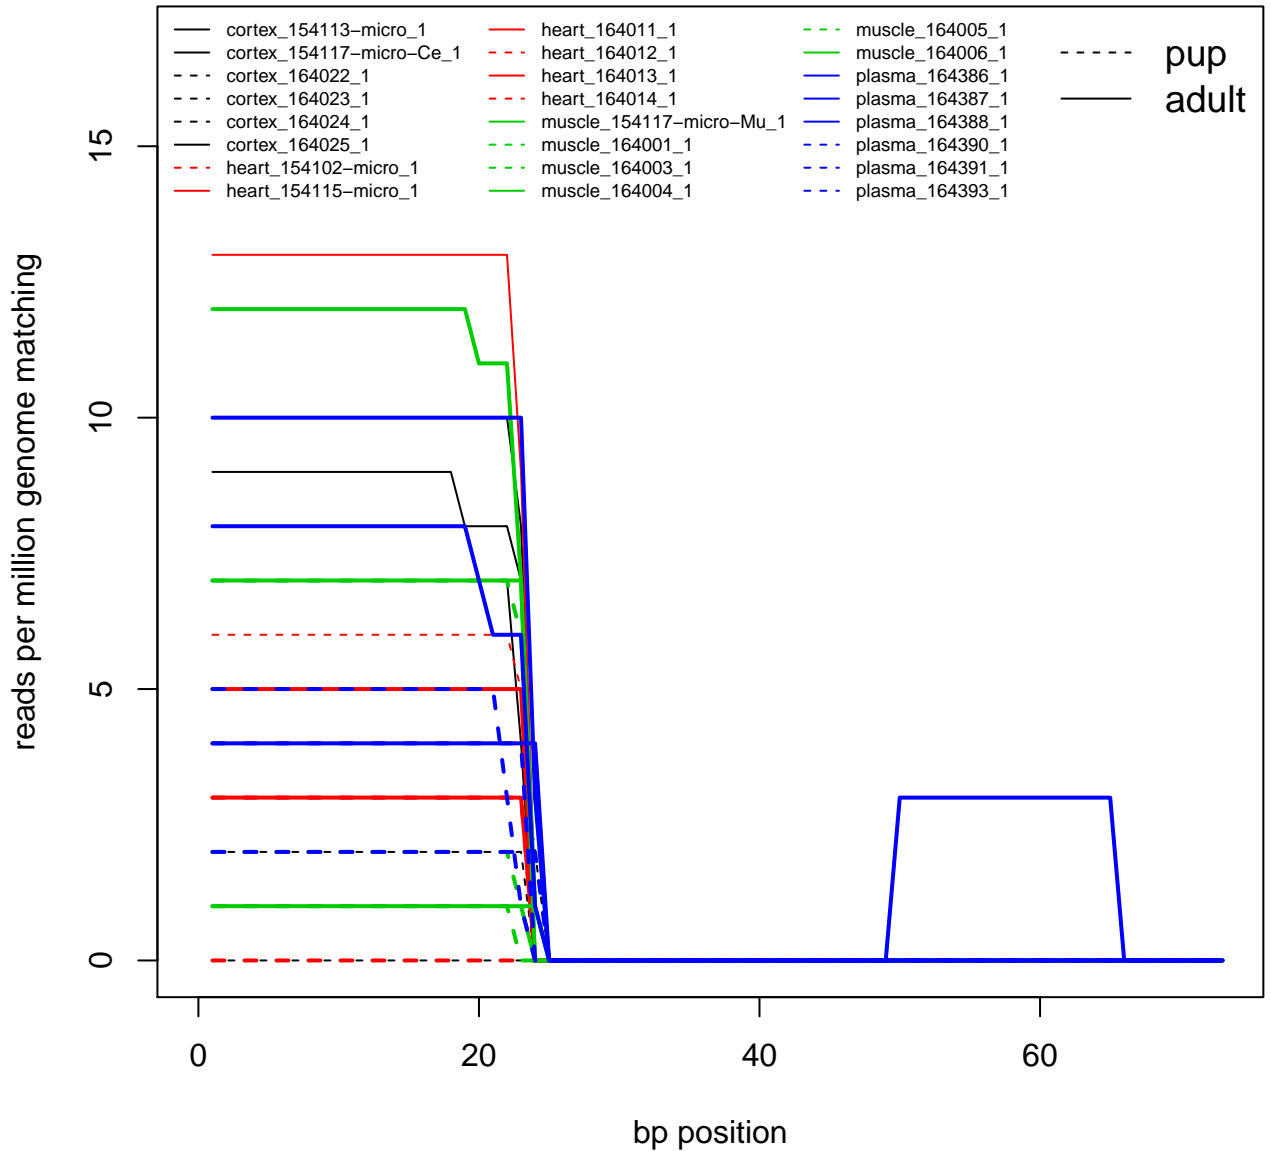

# WS\_miRDeep2\_novel\_68

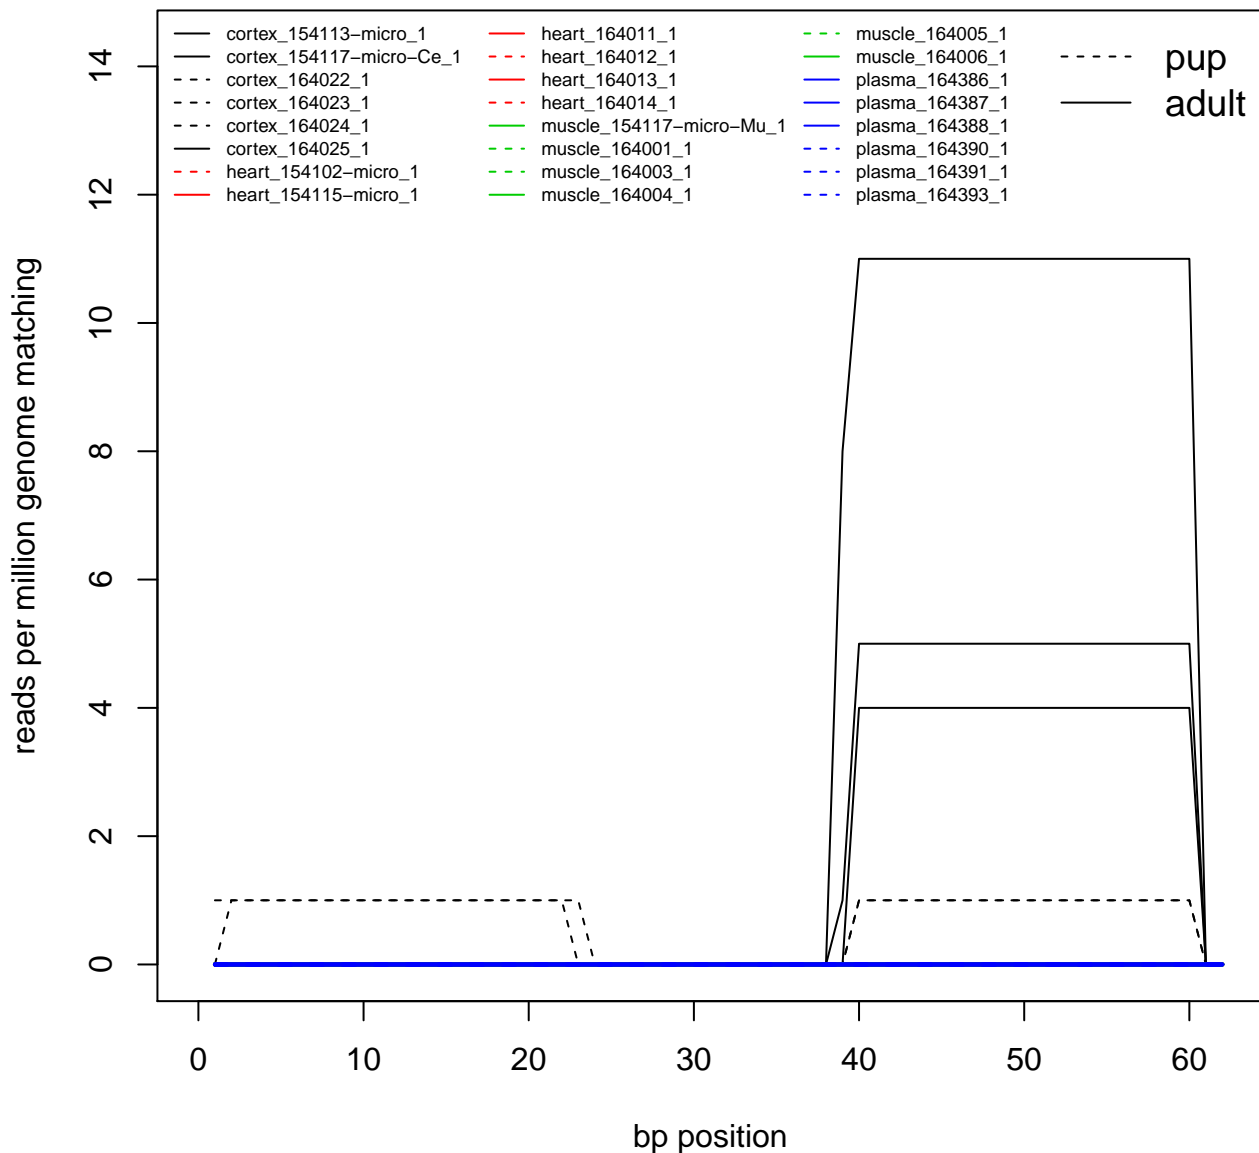



# lwe-miR-6529\_miRDeep2\_loc1

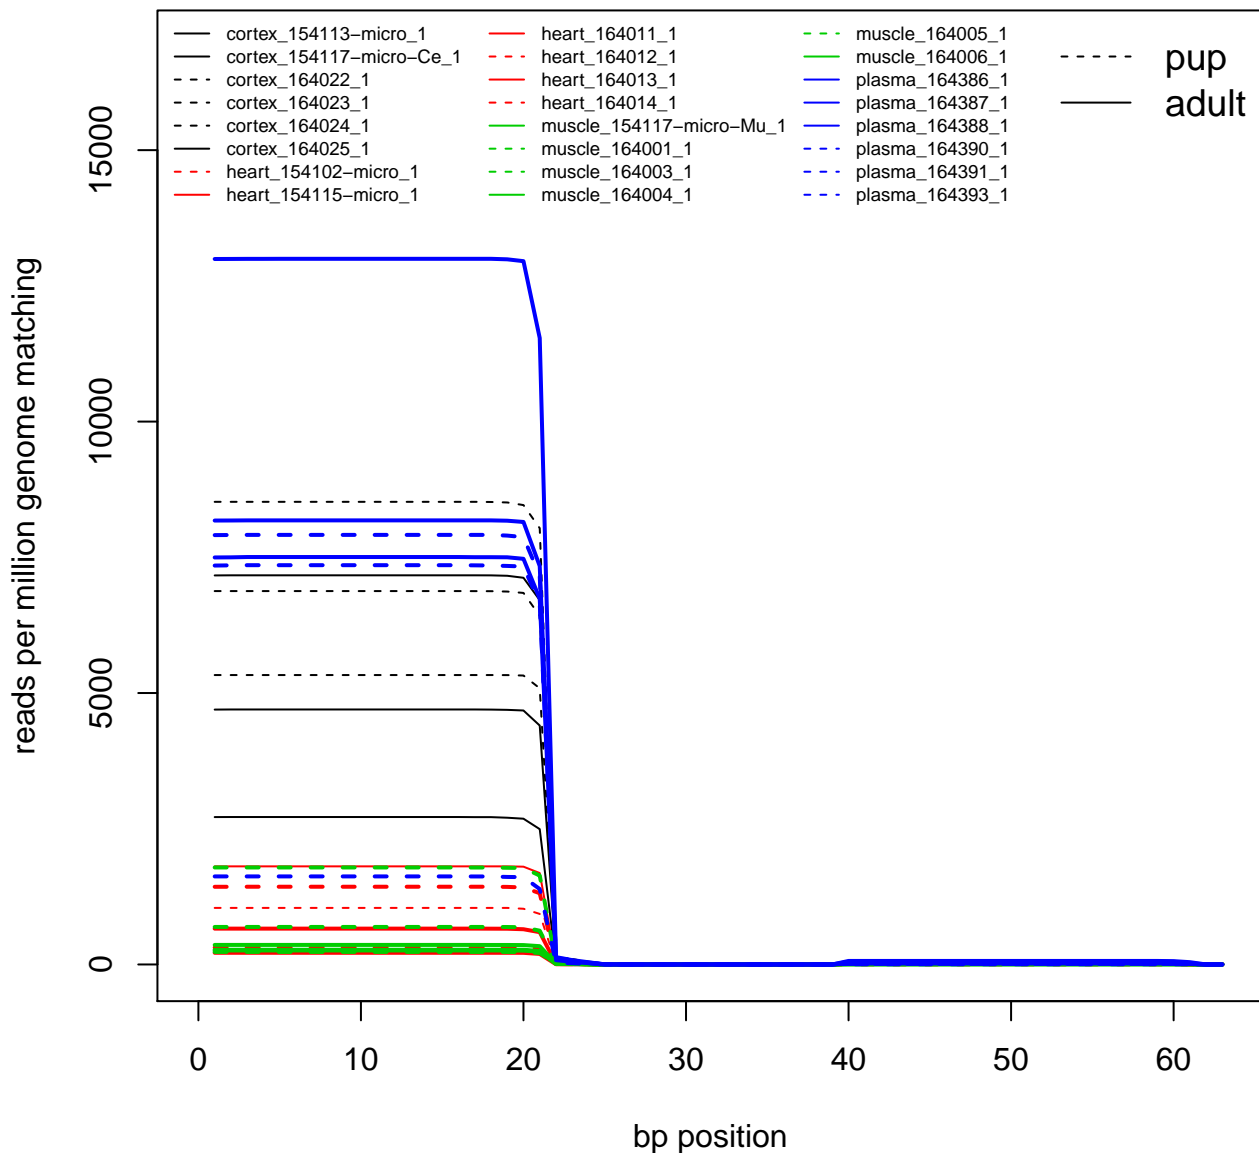



# lwe-miR-217\_miRDeep2\_loc1

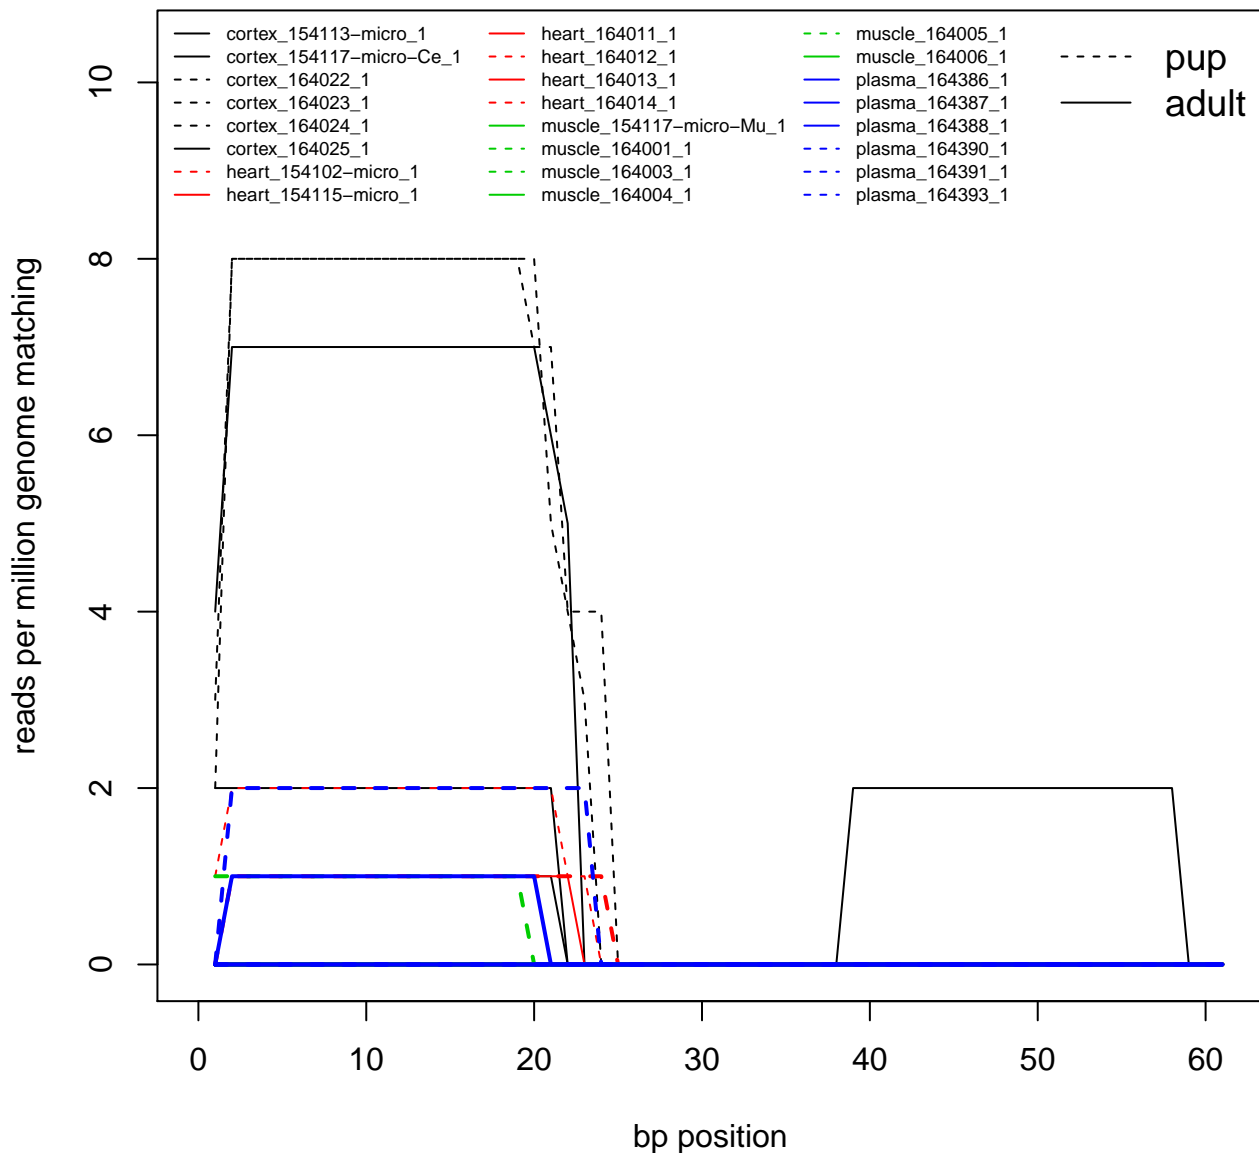

# lwe-miR-222\_miRDeep2\_loc1

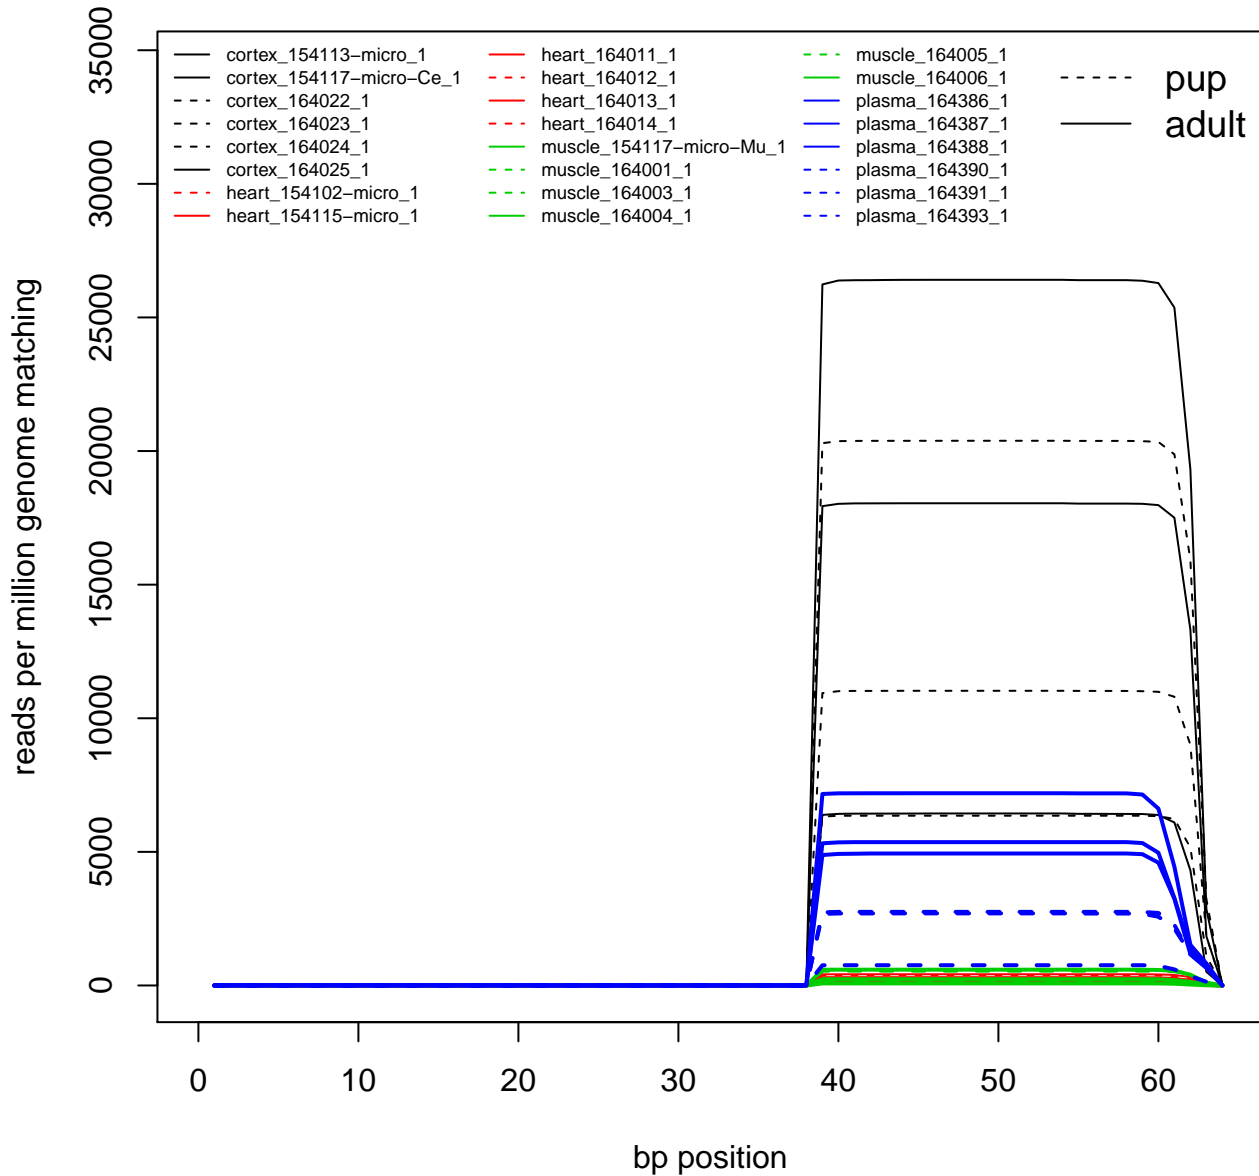

# WS\_miRDeep2\_novel\_70

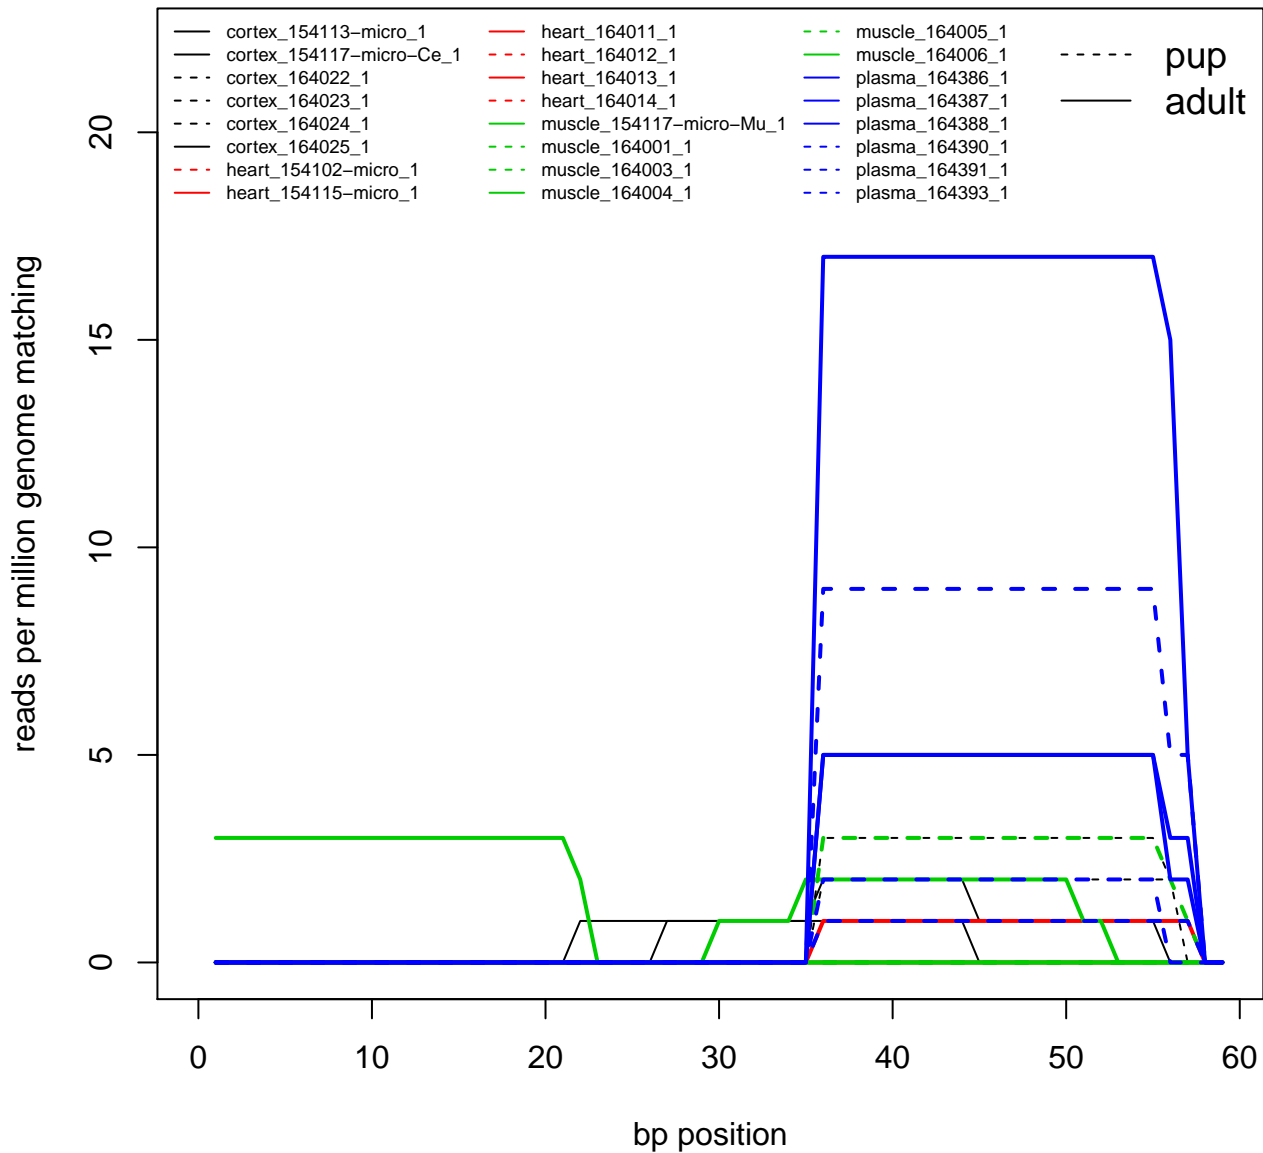

# WS\_miRDeep2\_novel\_71

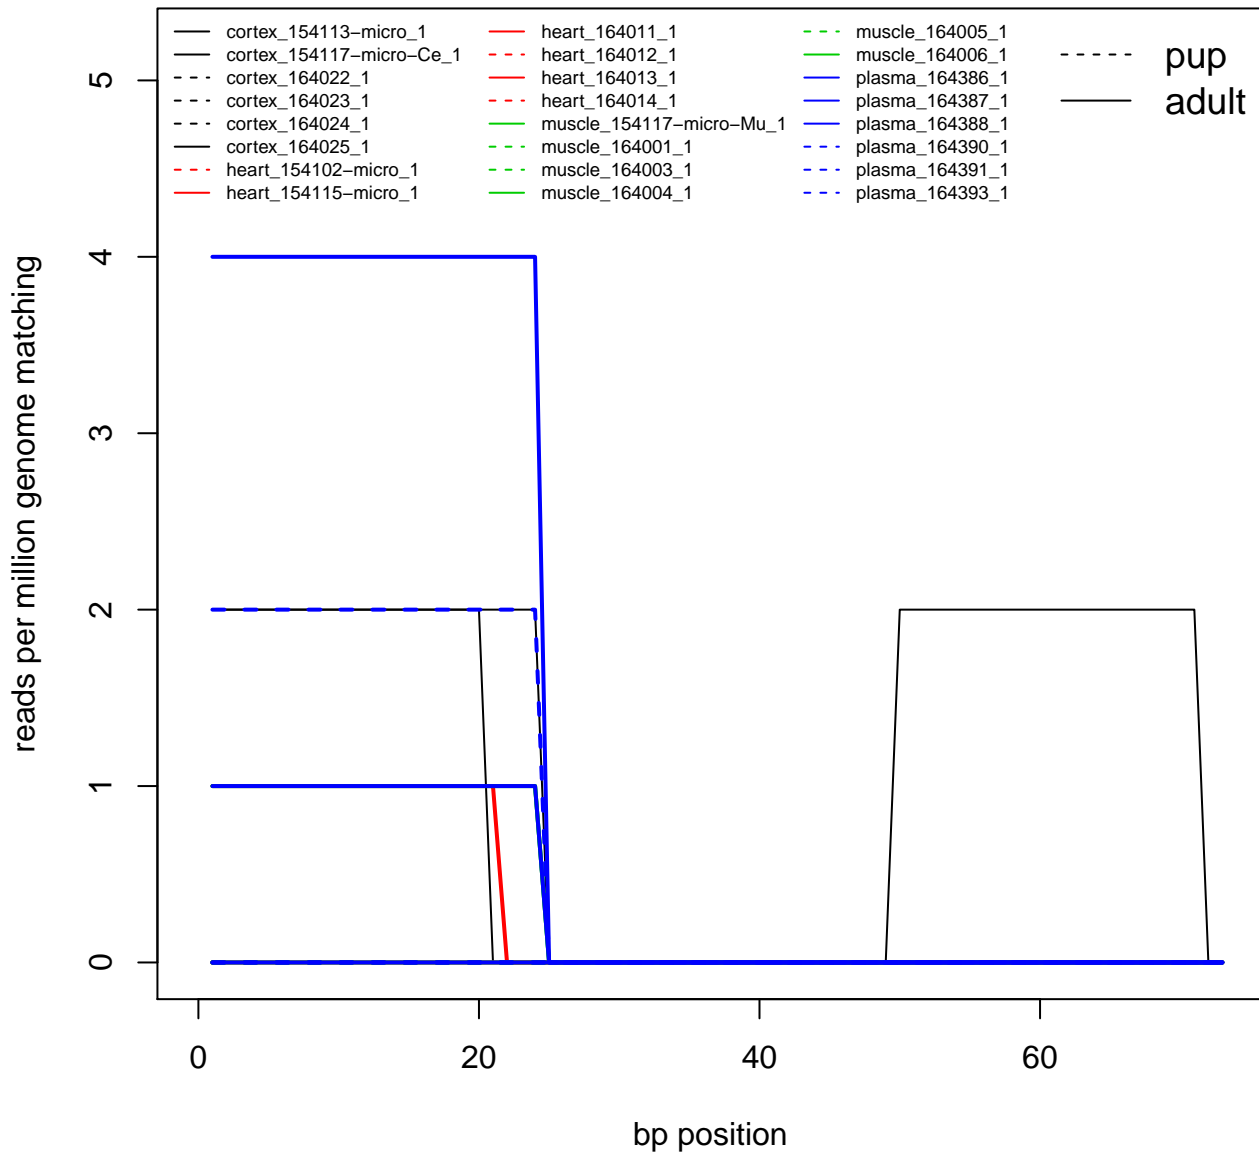

# WS\_miRDeep2\_novel\_72

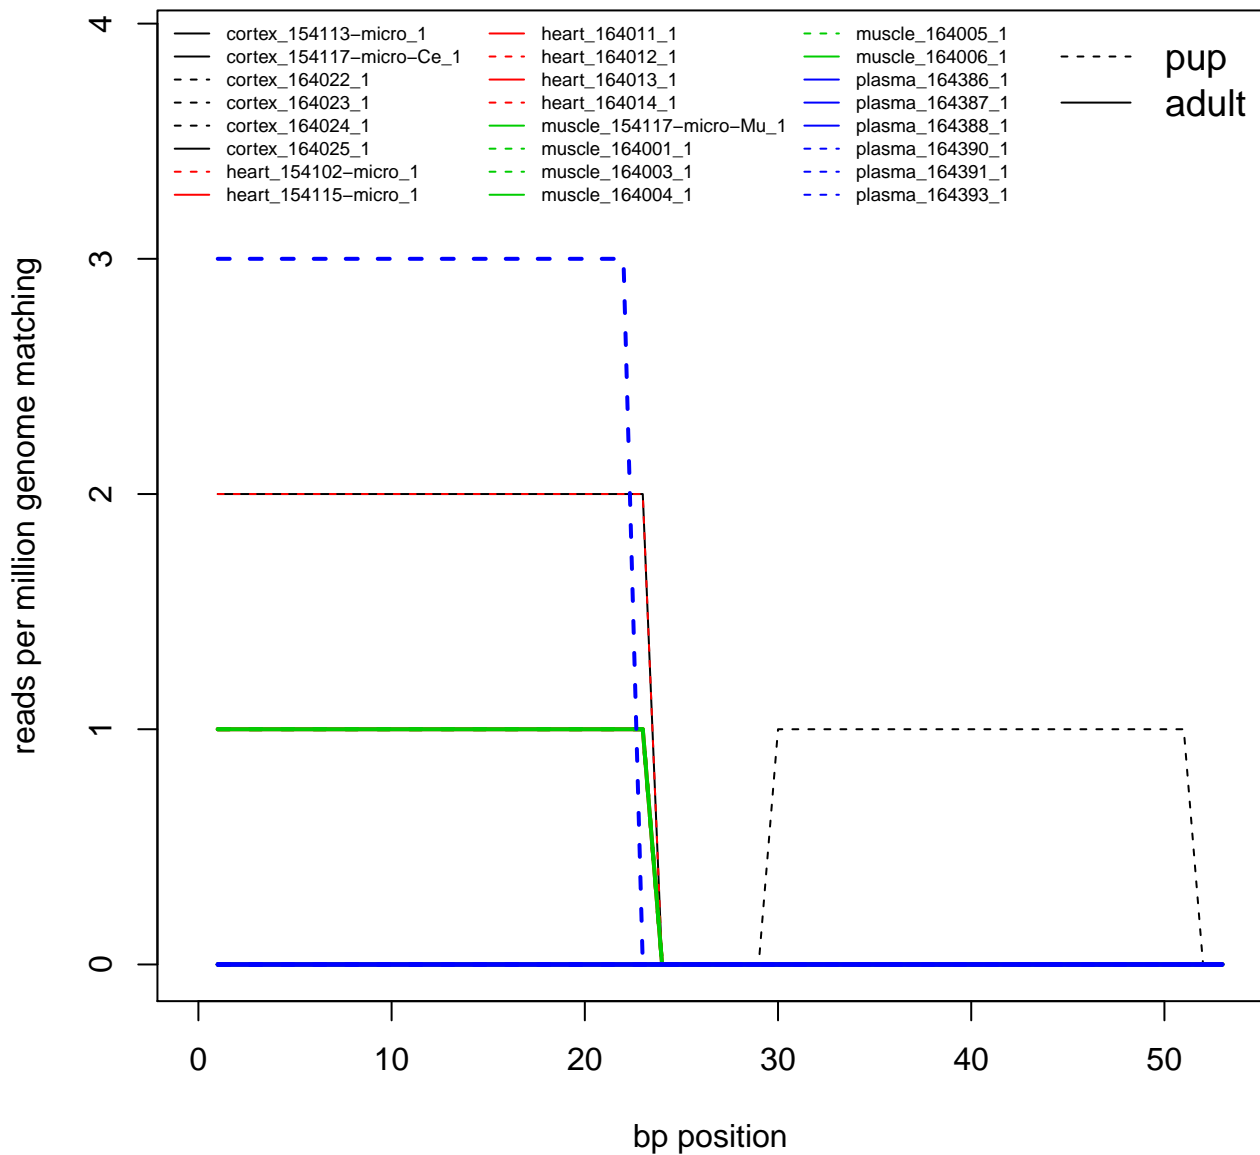





# WS\_miRDeep2\_novel\_73

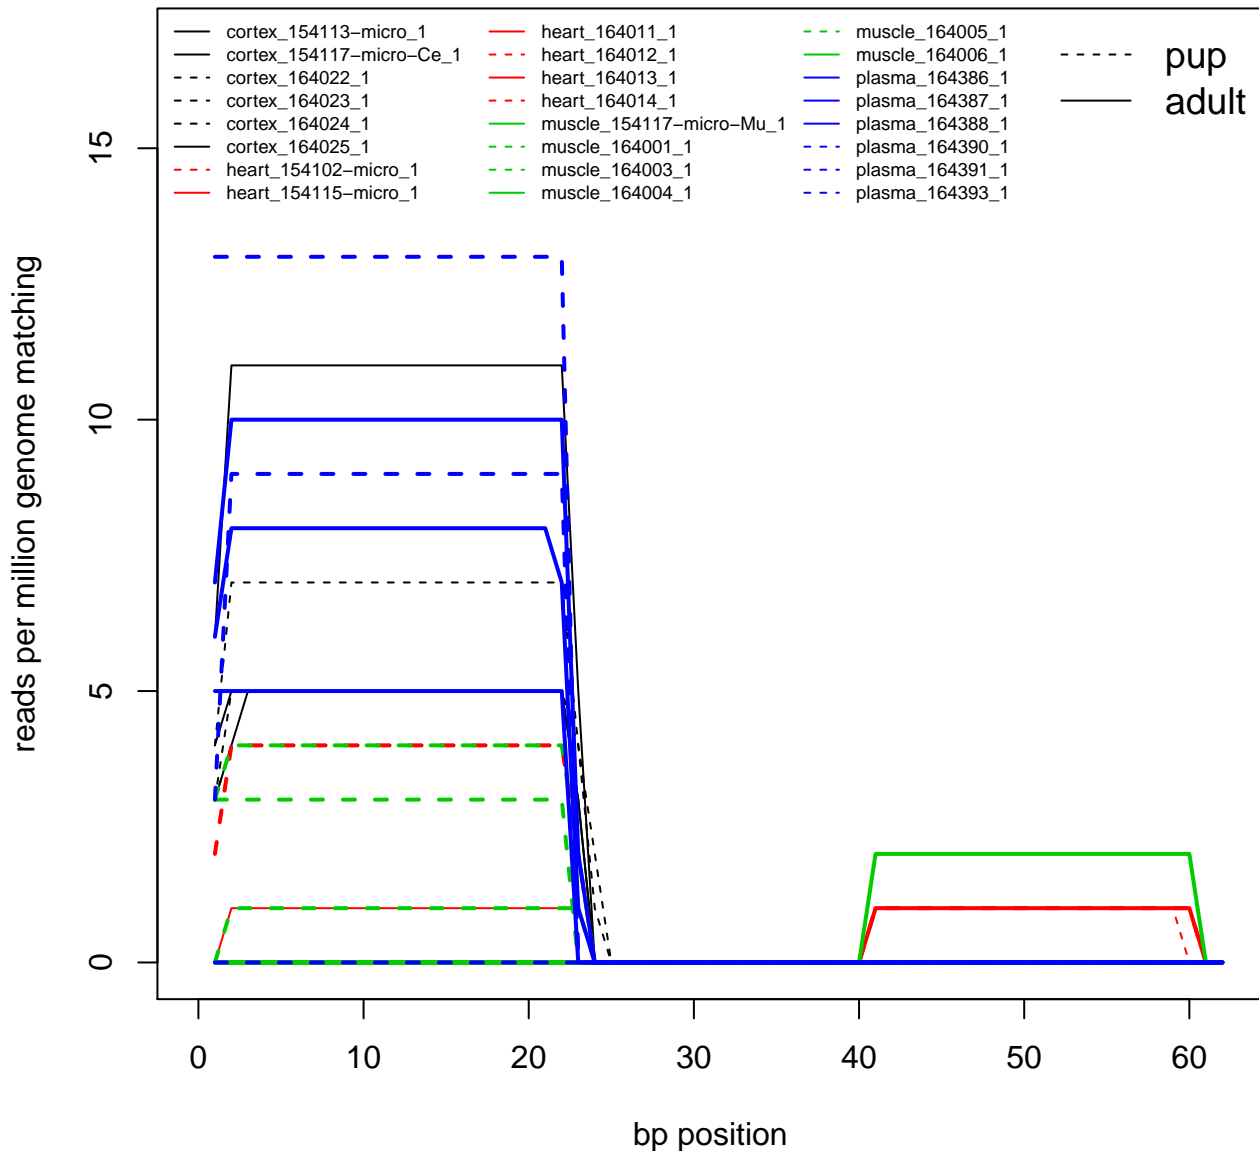

# WS\_miRDeep2\_novel\_74

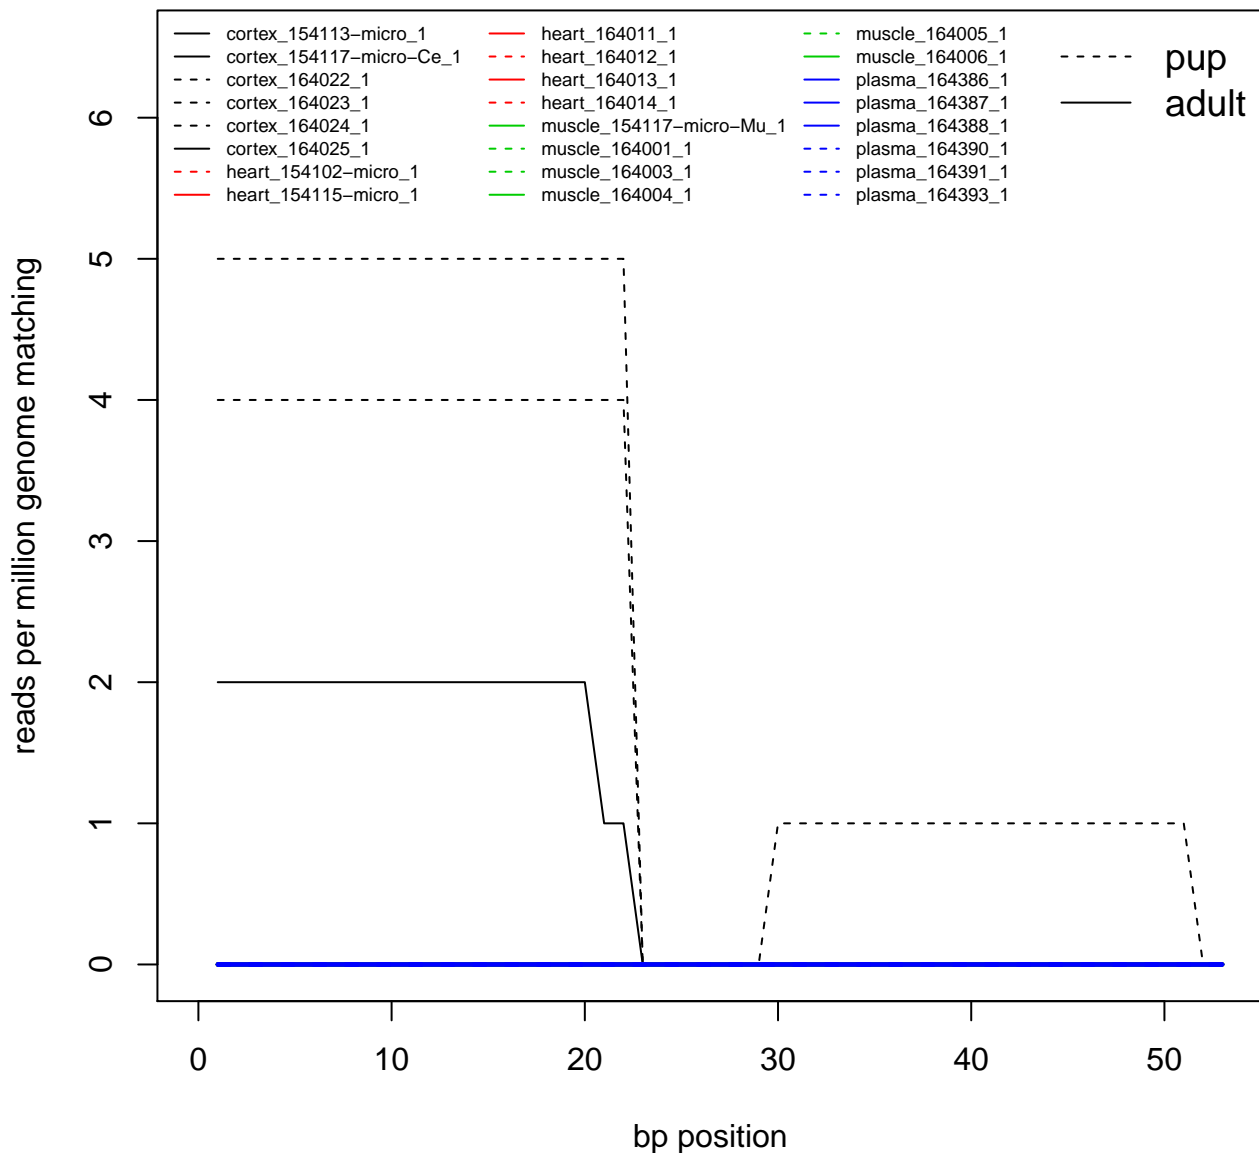

# WS\_miRDeep2\_novel\_75

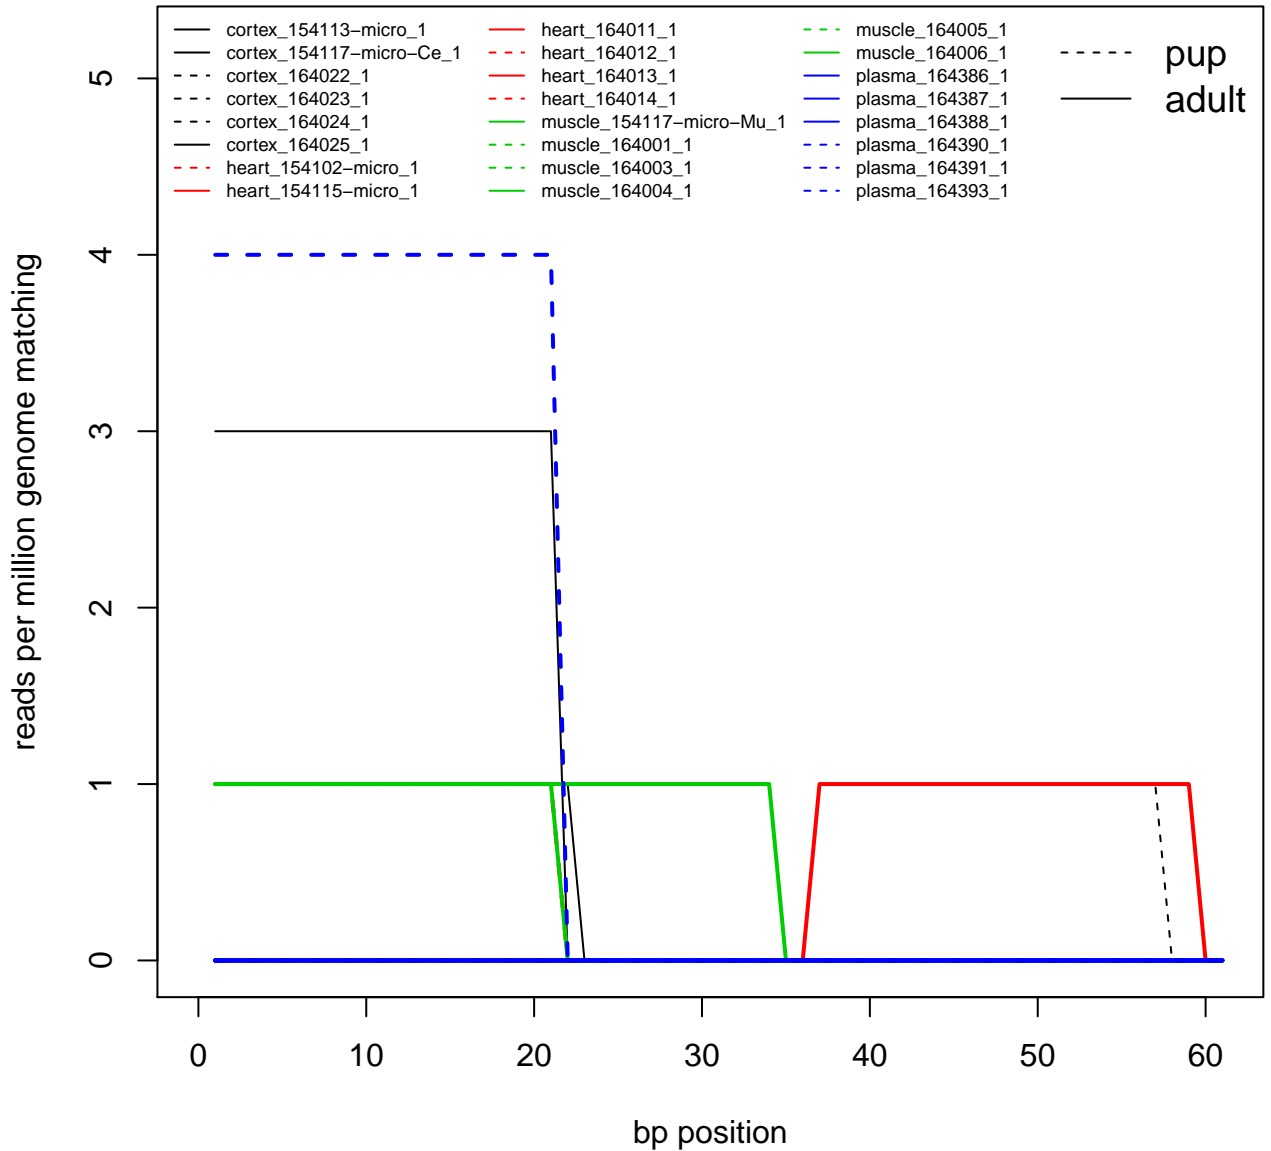

# lwe-miR-7\_miRDeep2\_loc2

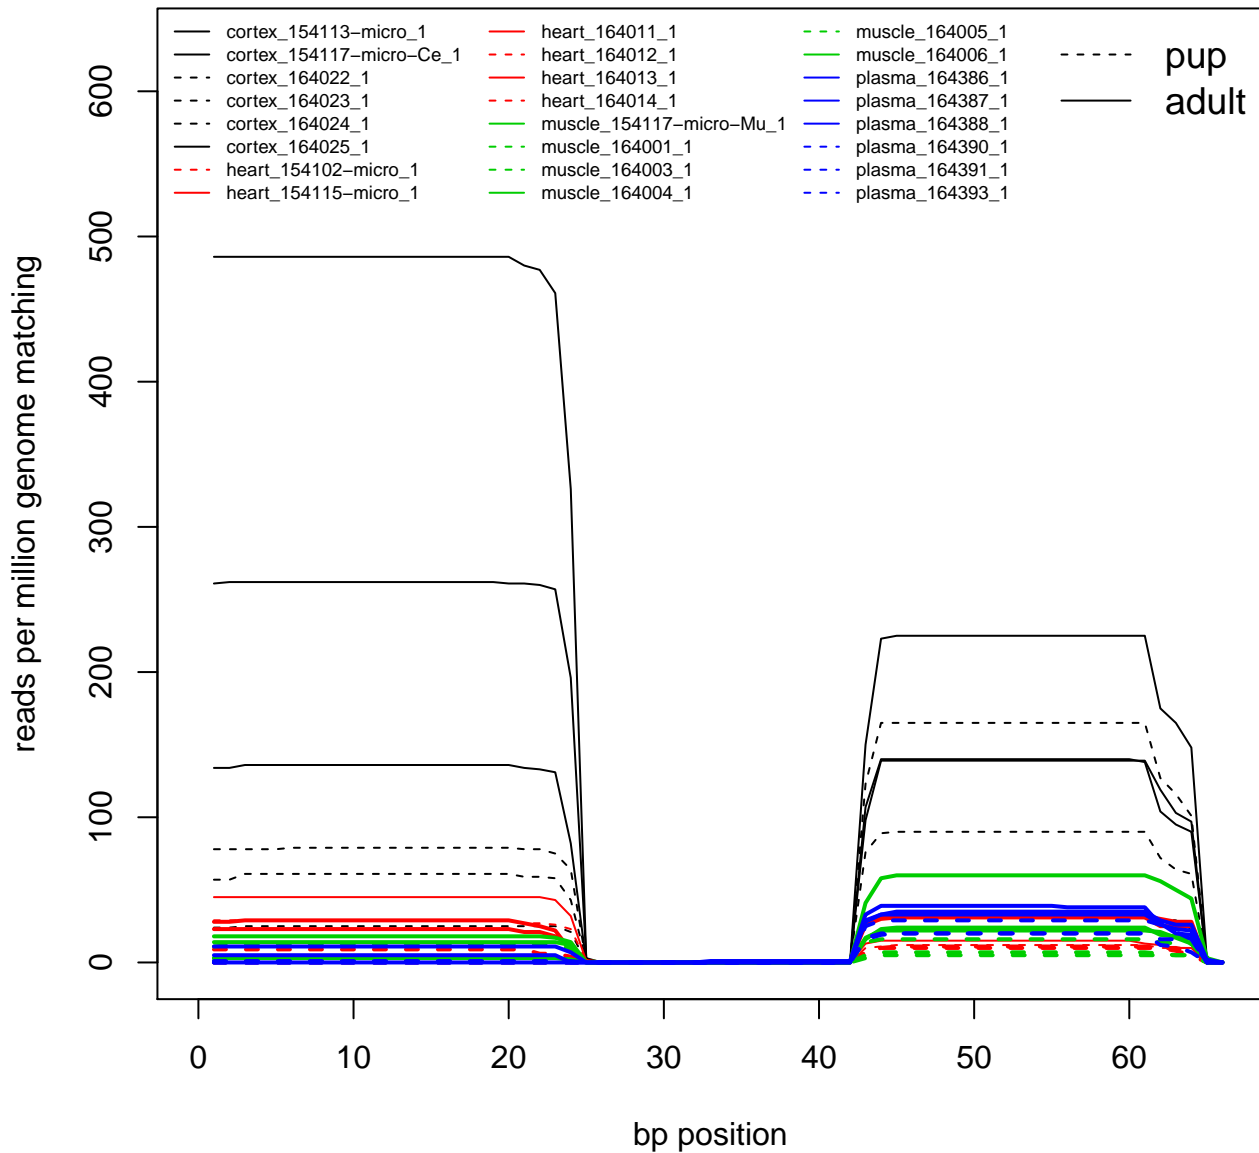



# WS\_miRDeep2\_novel\_77

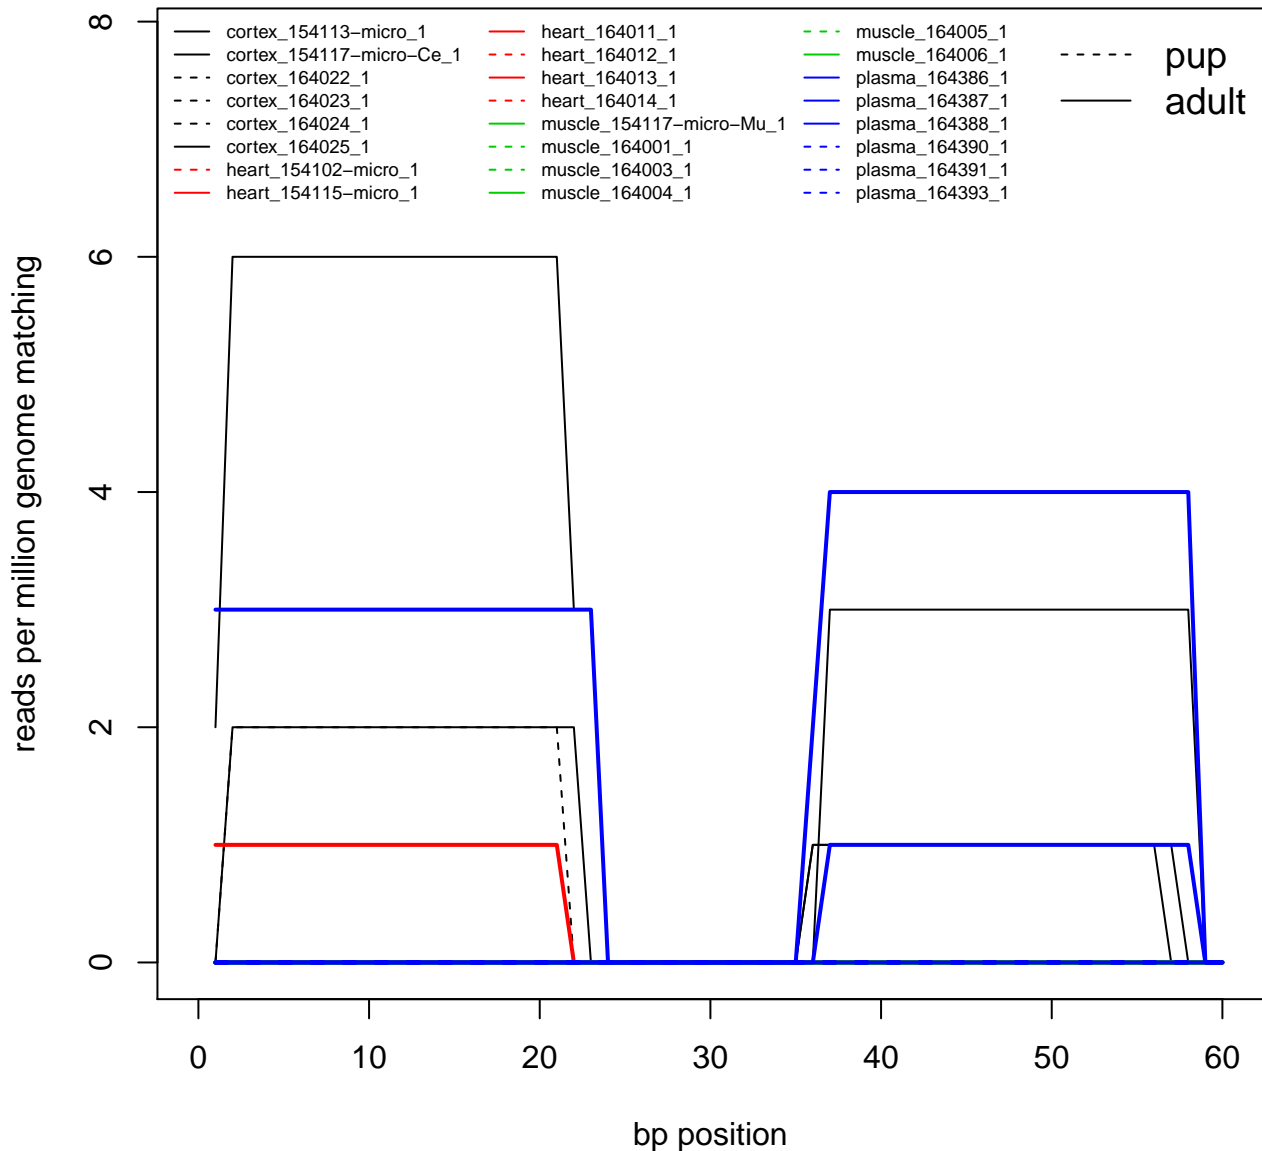

# WS\_miRDeep2\_novel\_78

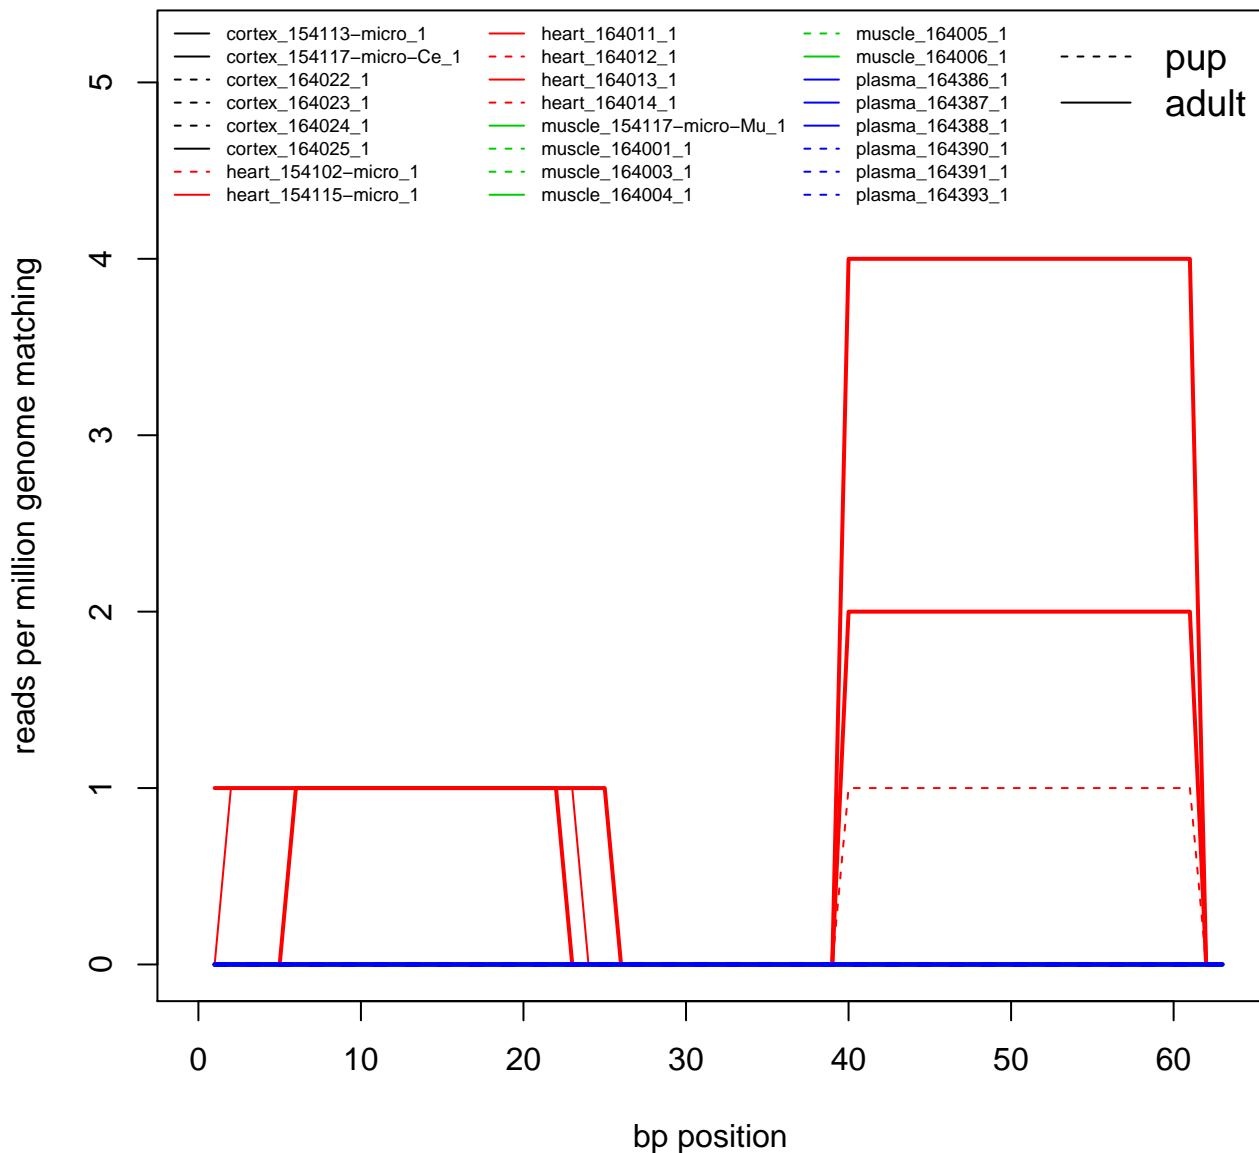

# WS\_miRDeep2\_novel\_79

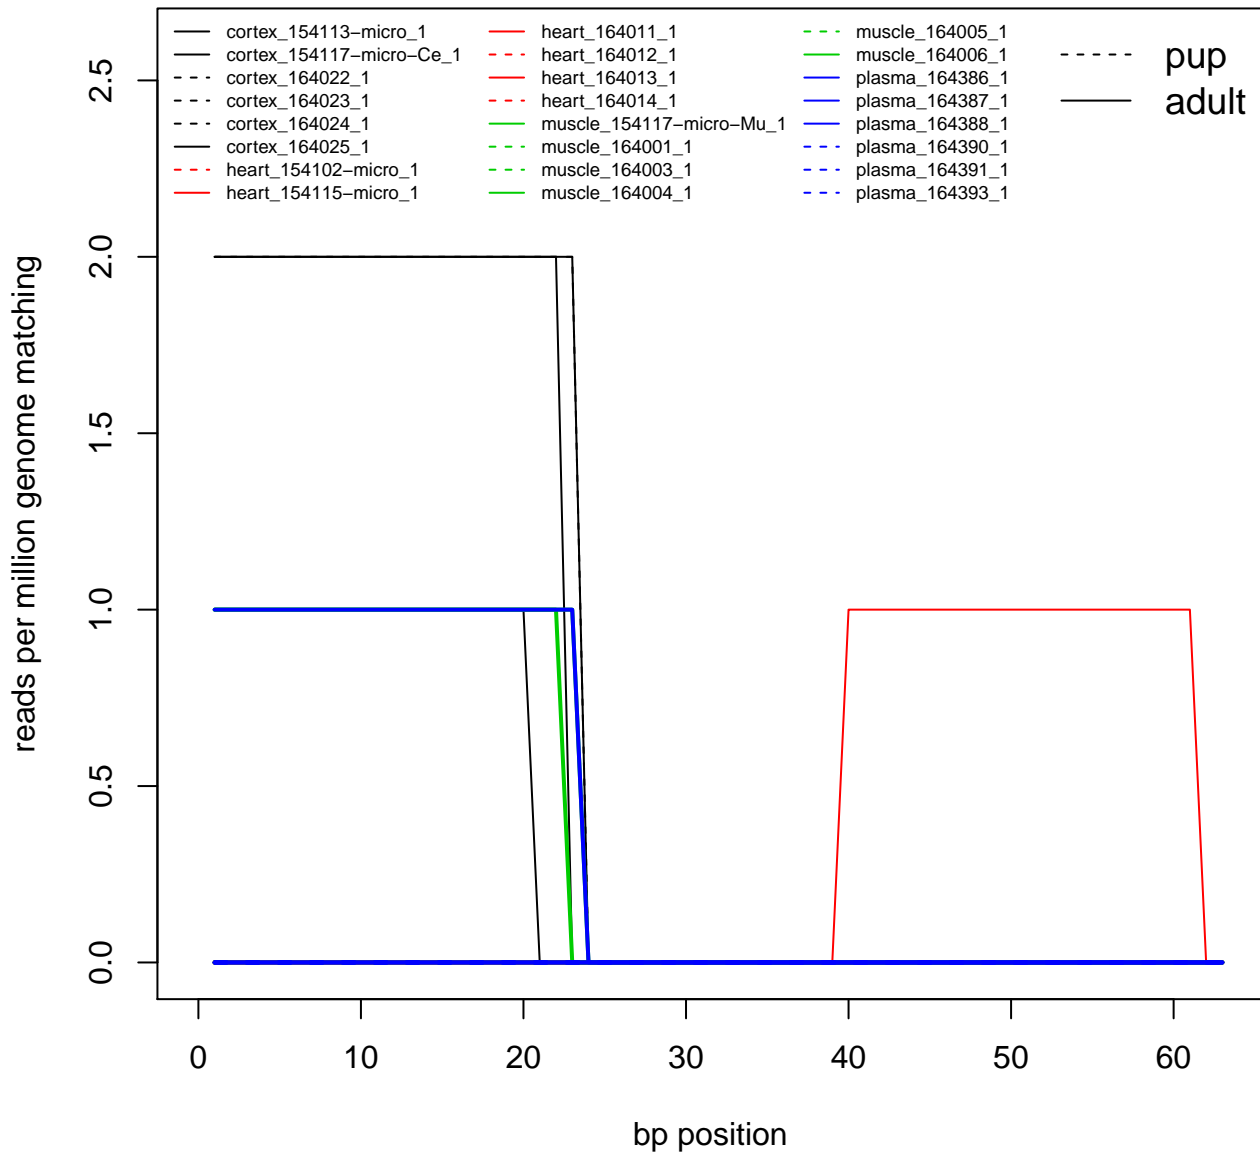



# WS\_miRDeep2\_novel\_80

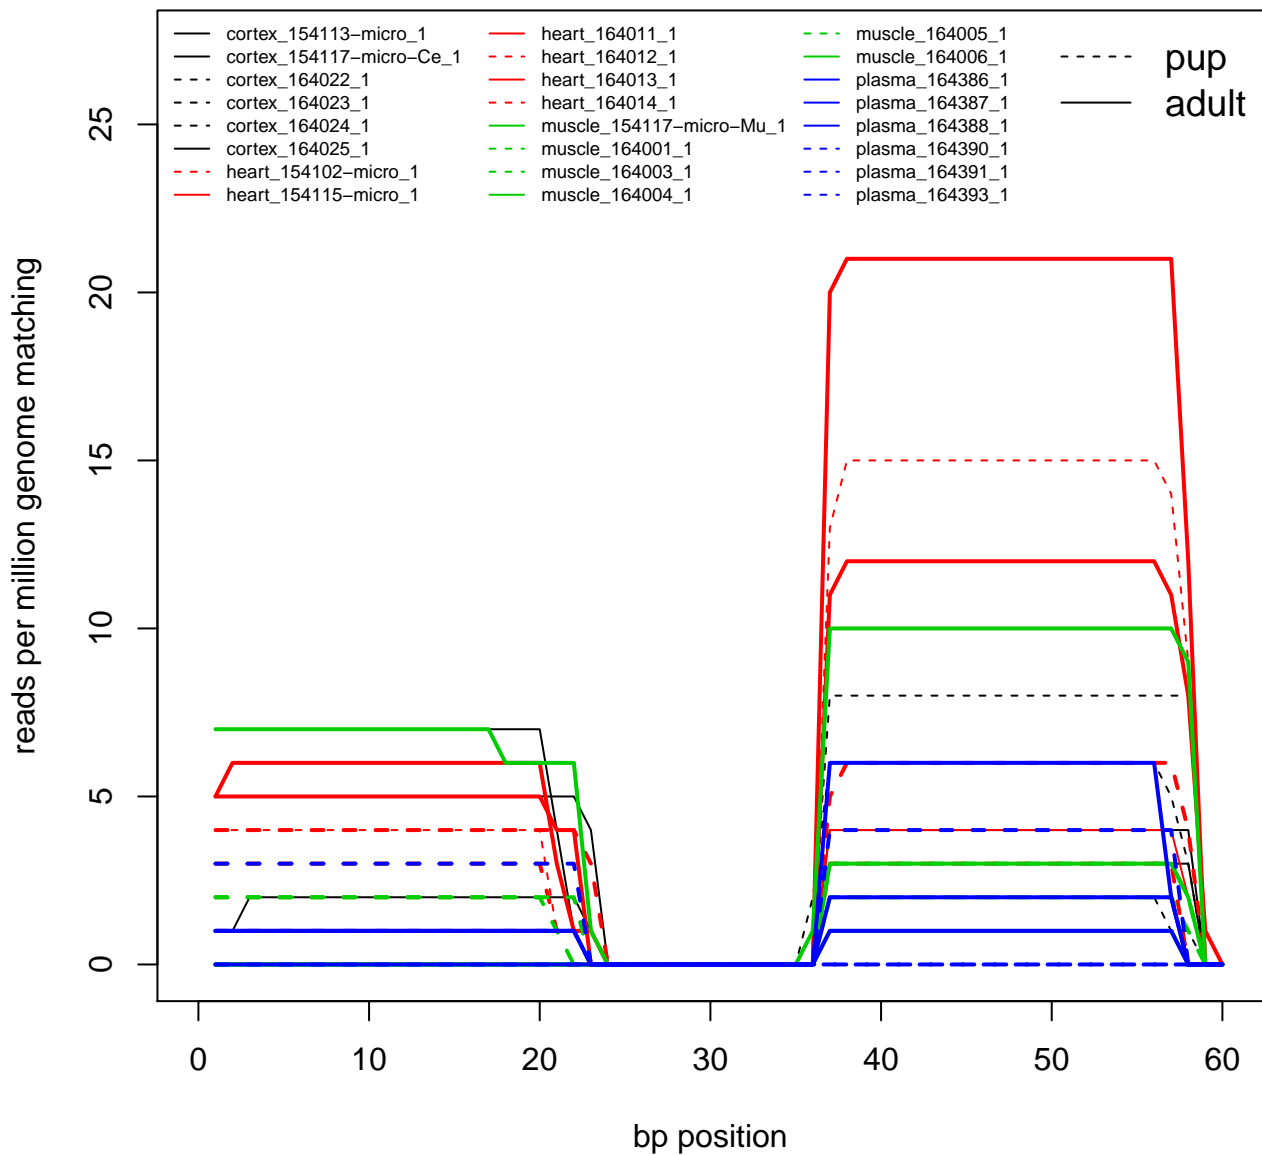

# WS\_miRDeep2\_novel\_81

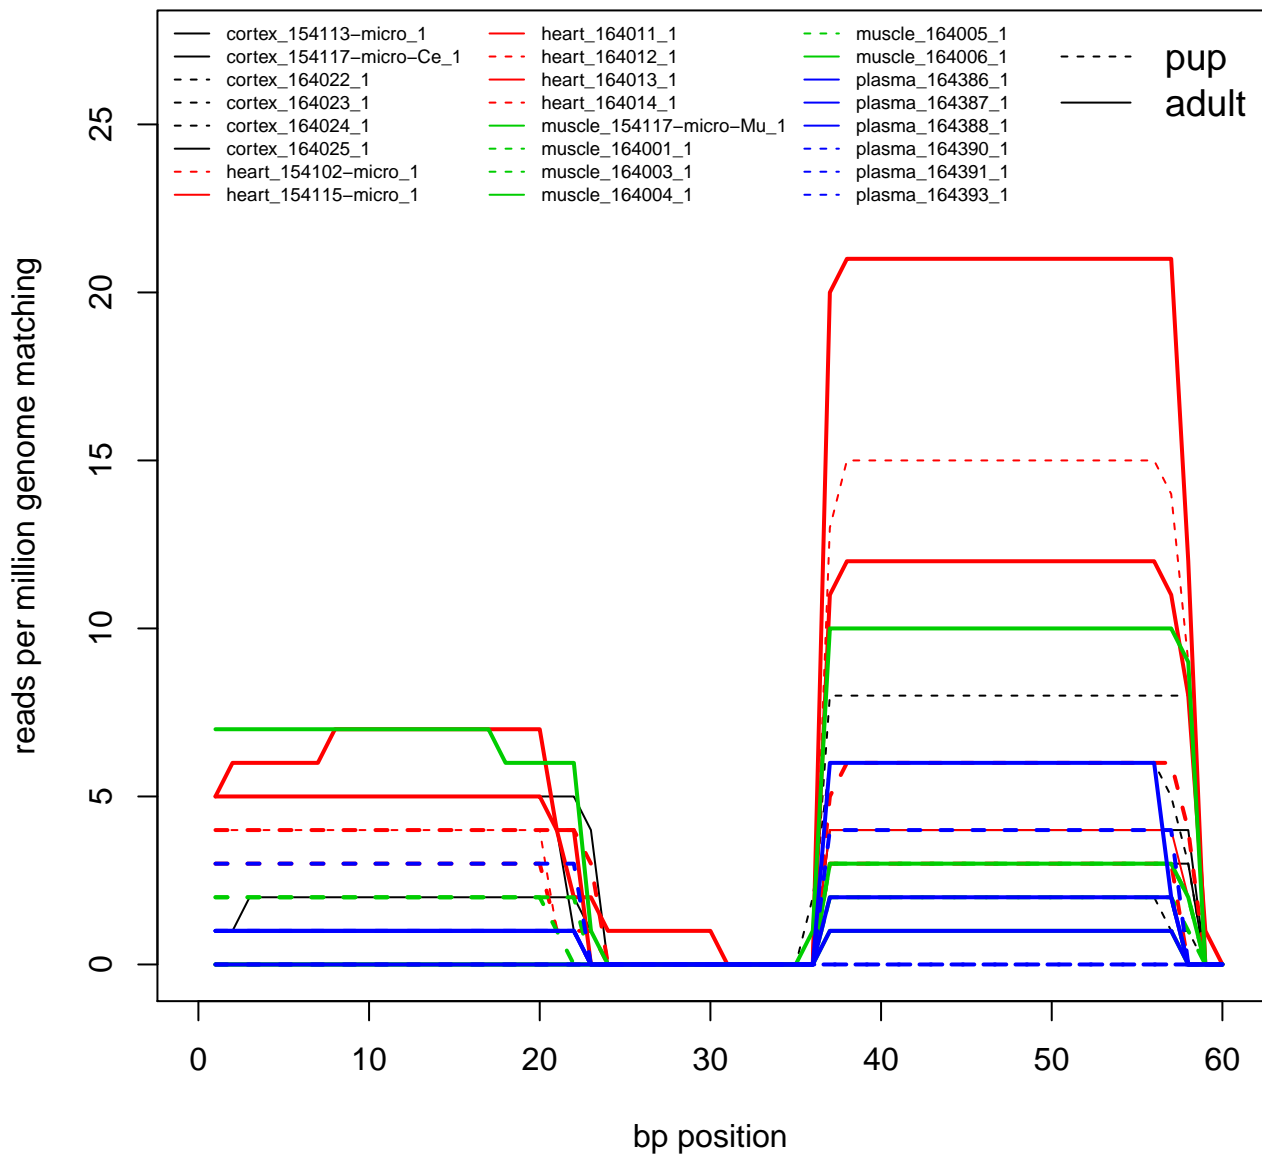

# WS\_miRDeep2\_novel\_82

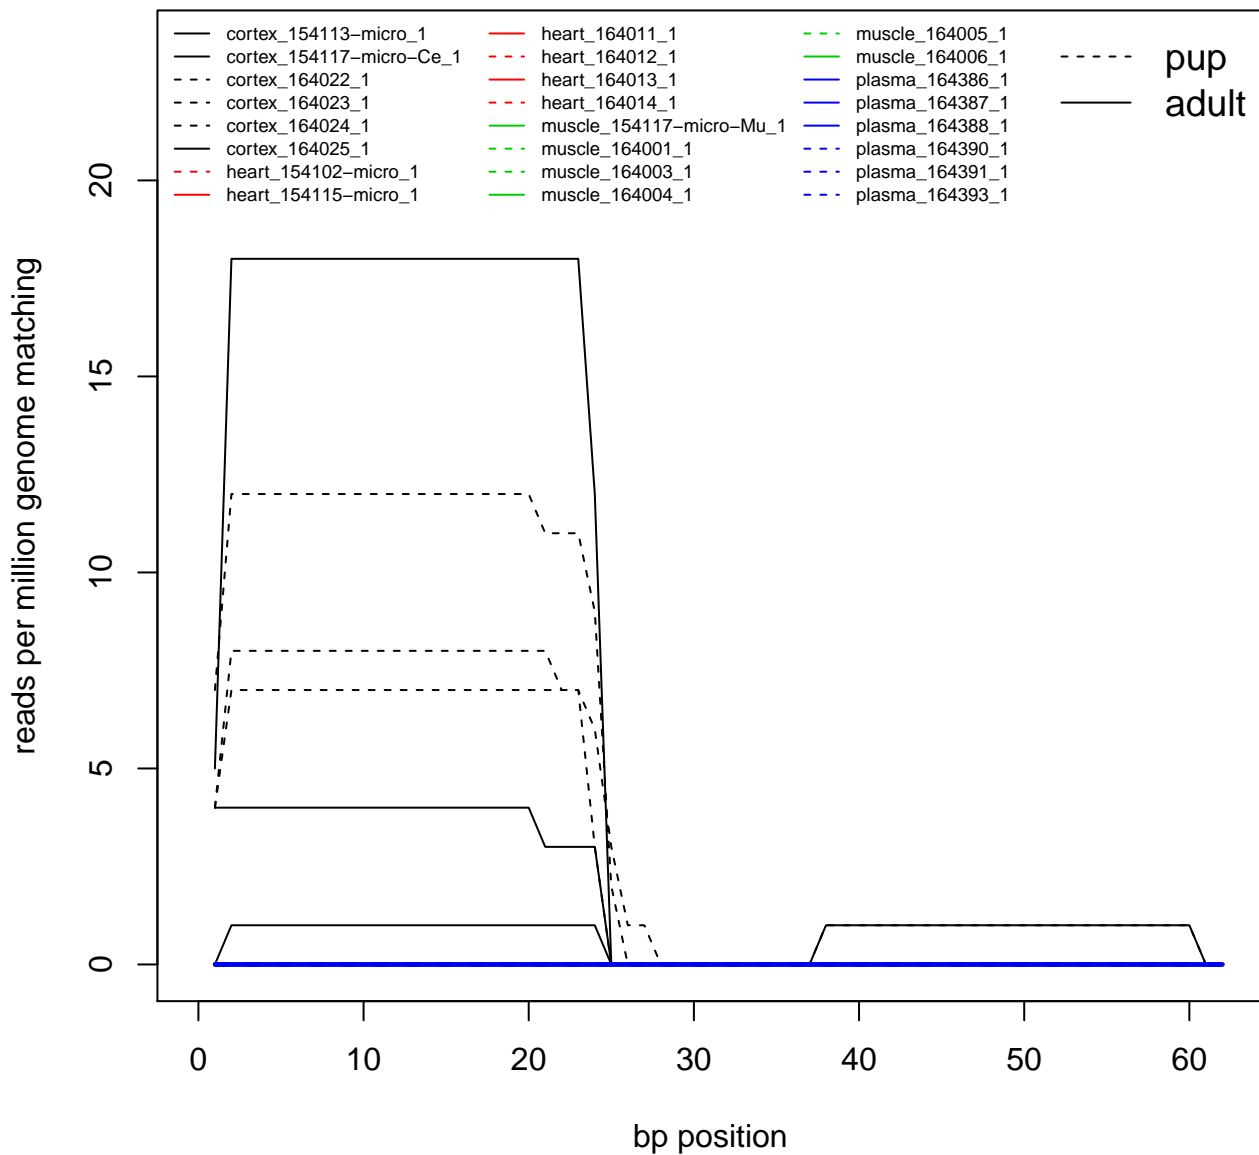

# WS\_miRDeep2\_novel\_83

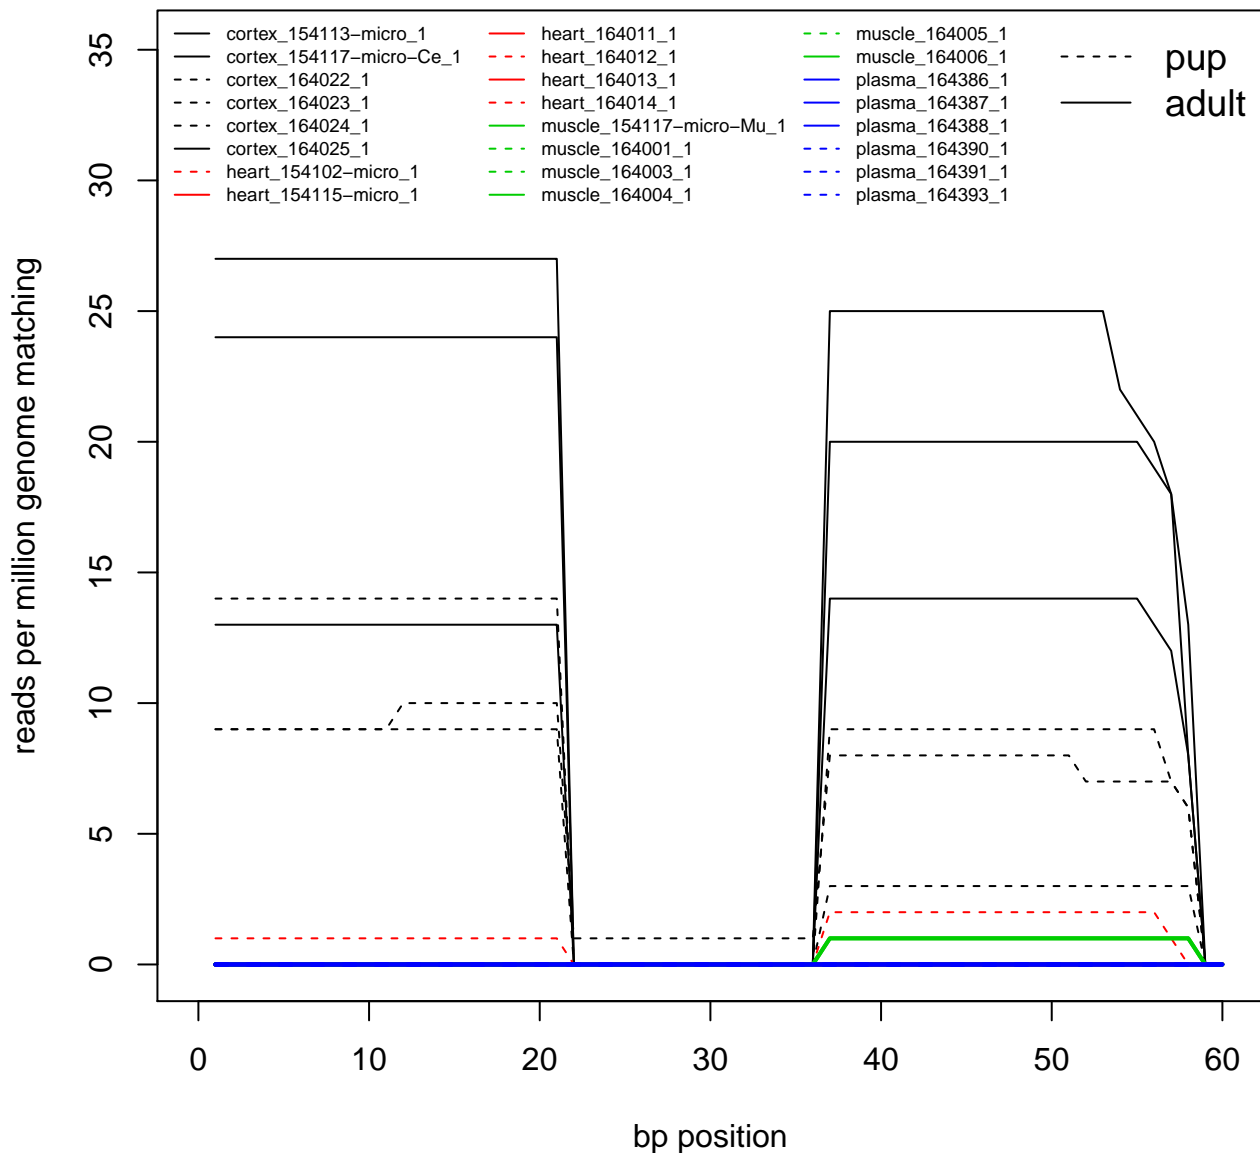

# WS\_miRDeep2\_novel\_84

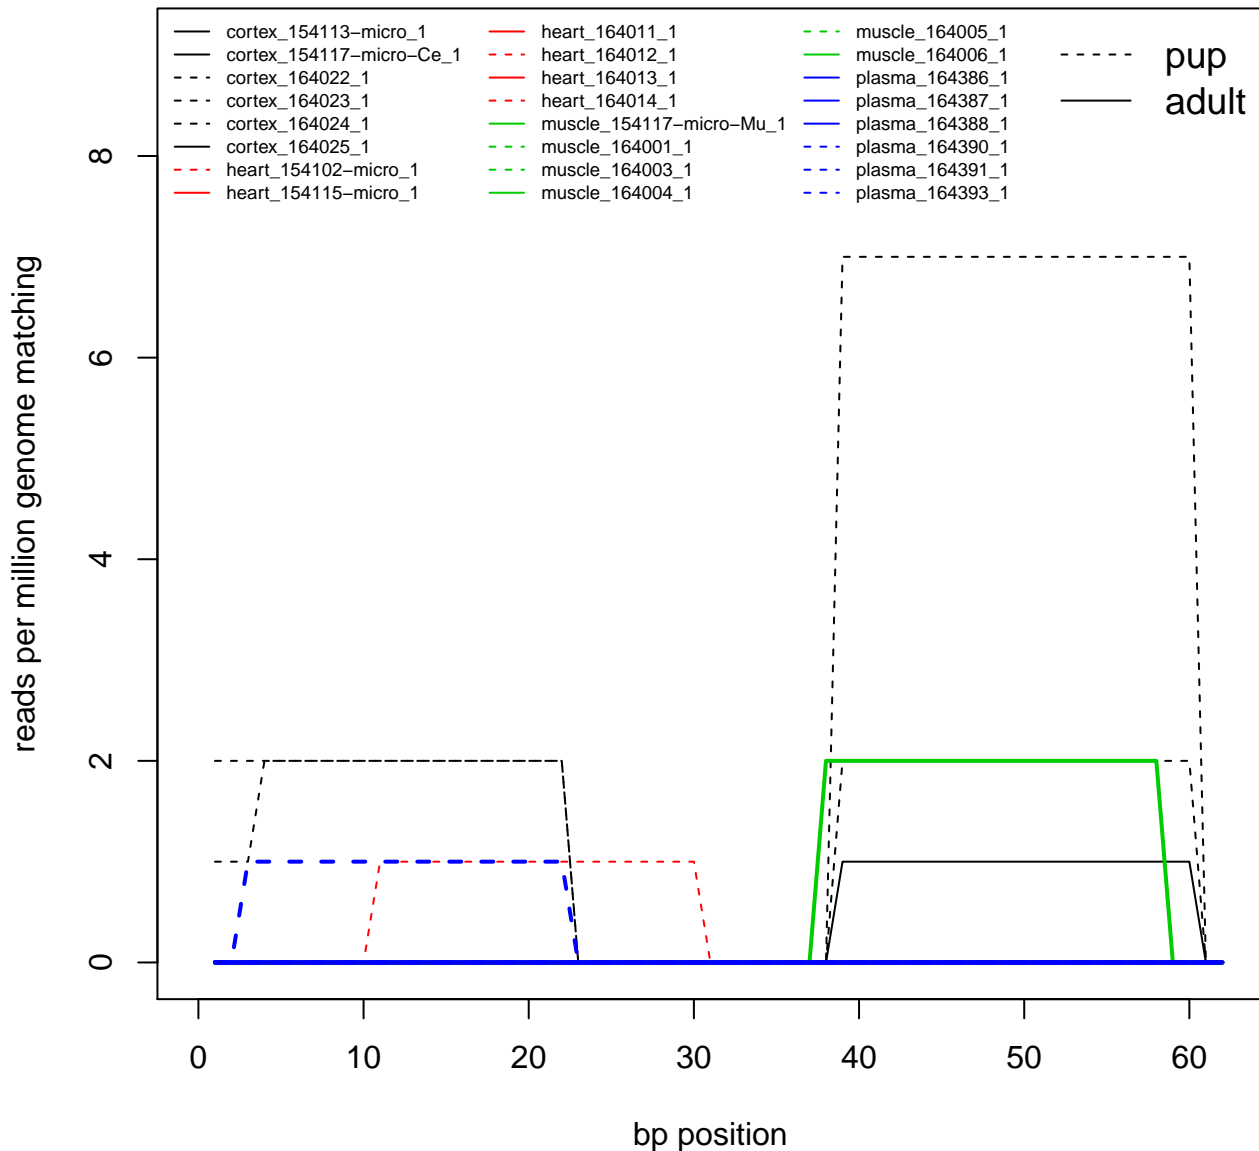

# WS\_miRDeep2\_novel\_85

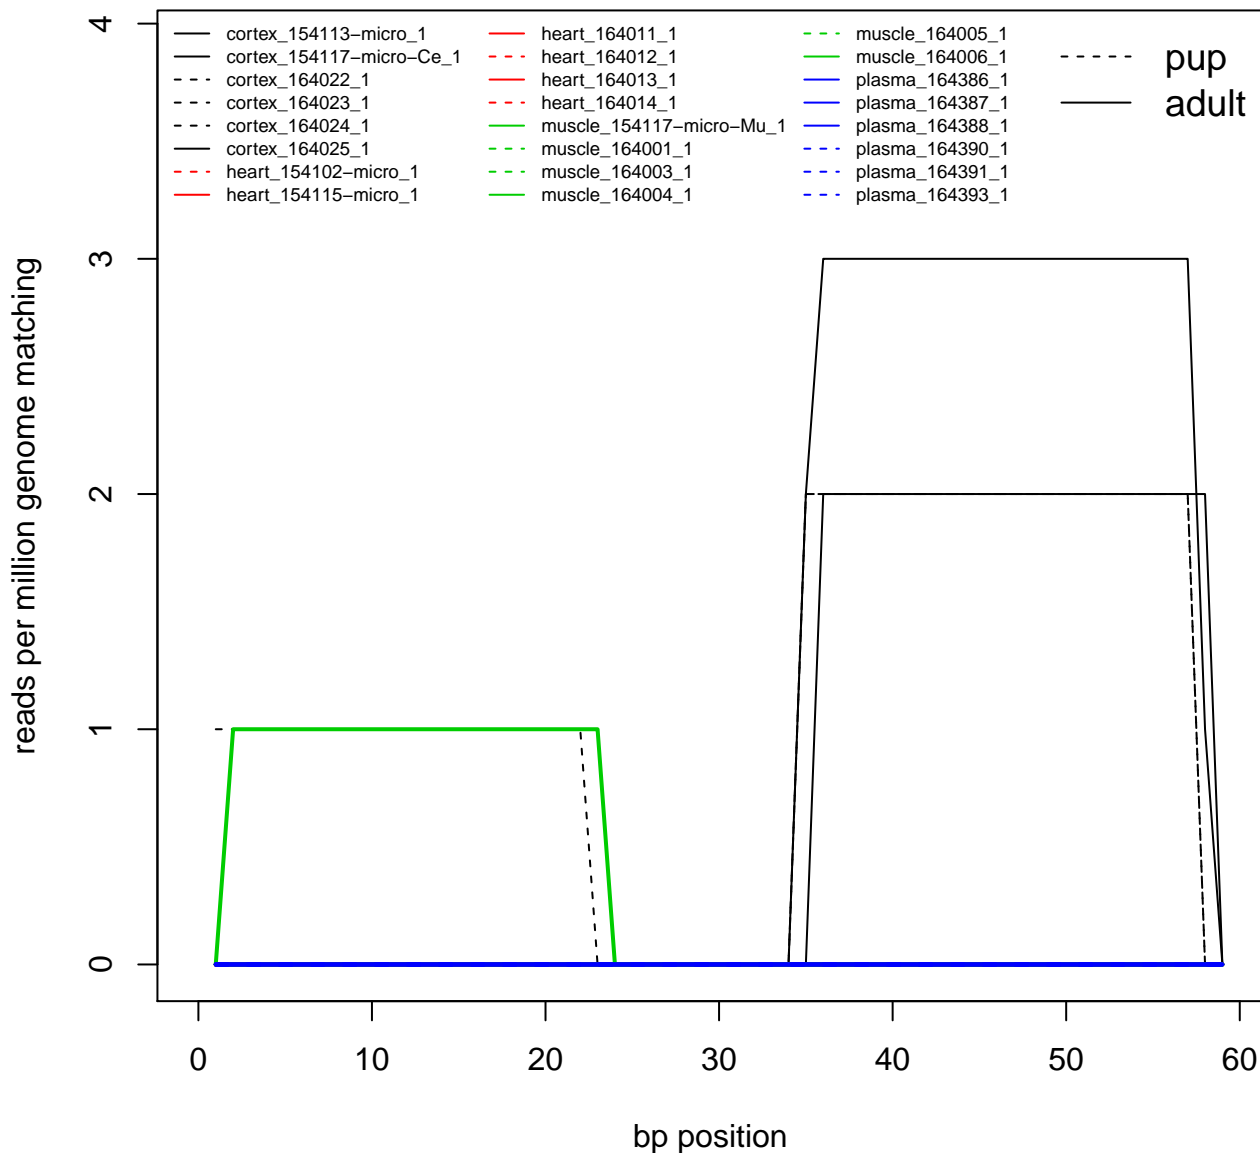

# WS\_miRDeep2\_novel\_86

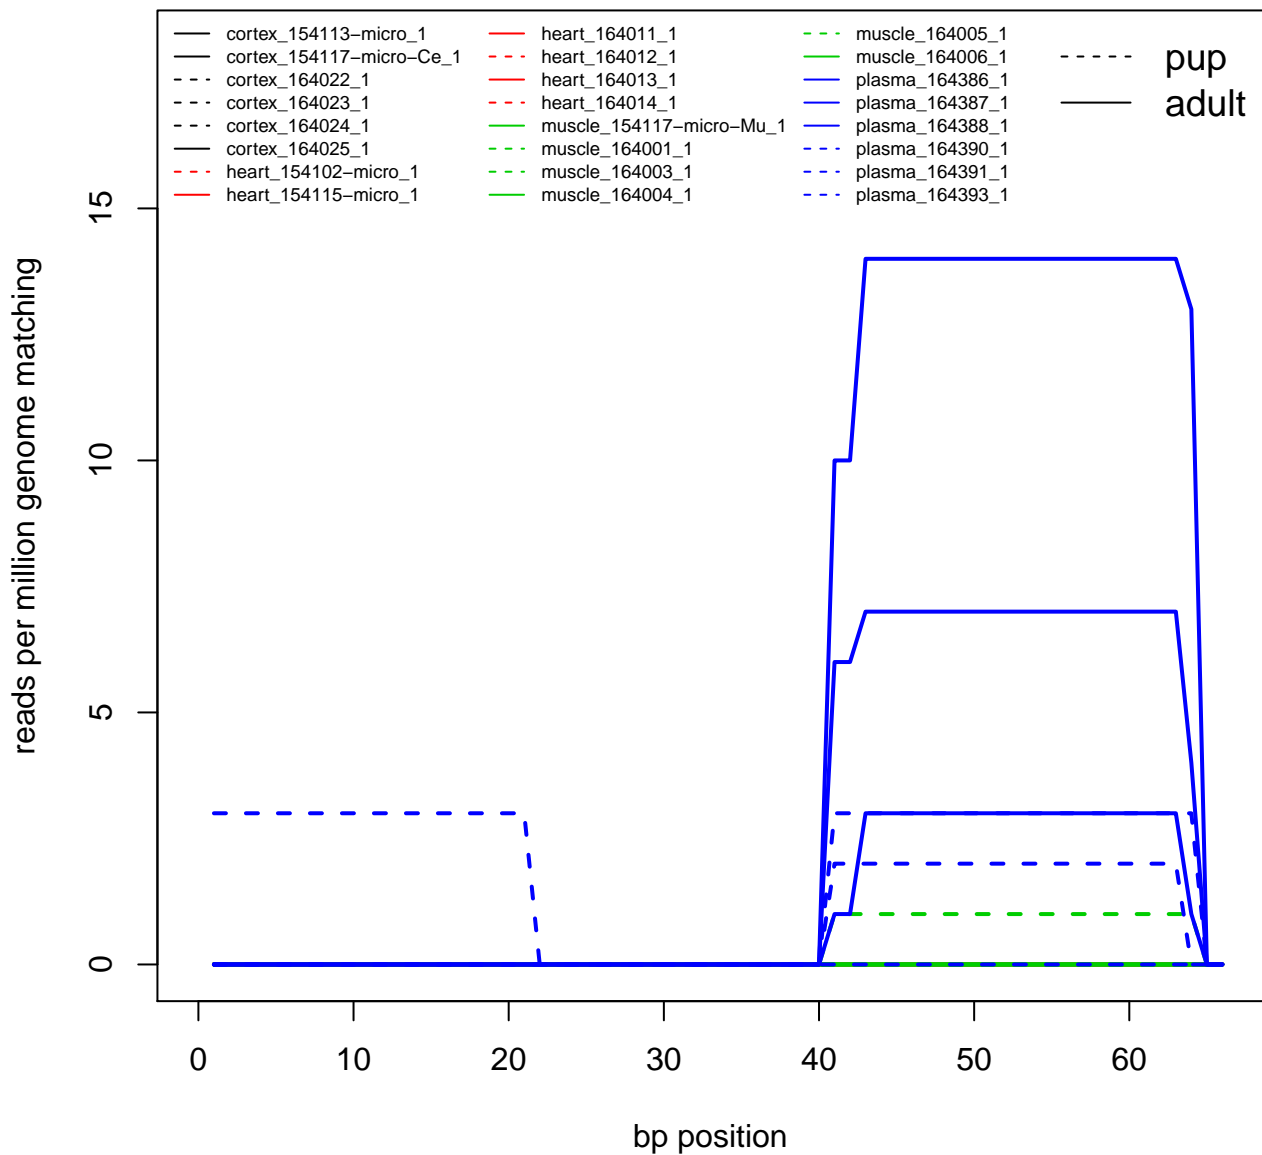

# lwe-miR-486\_miRDeep2\_loc1

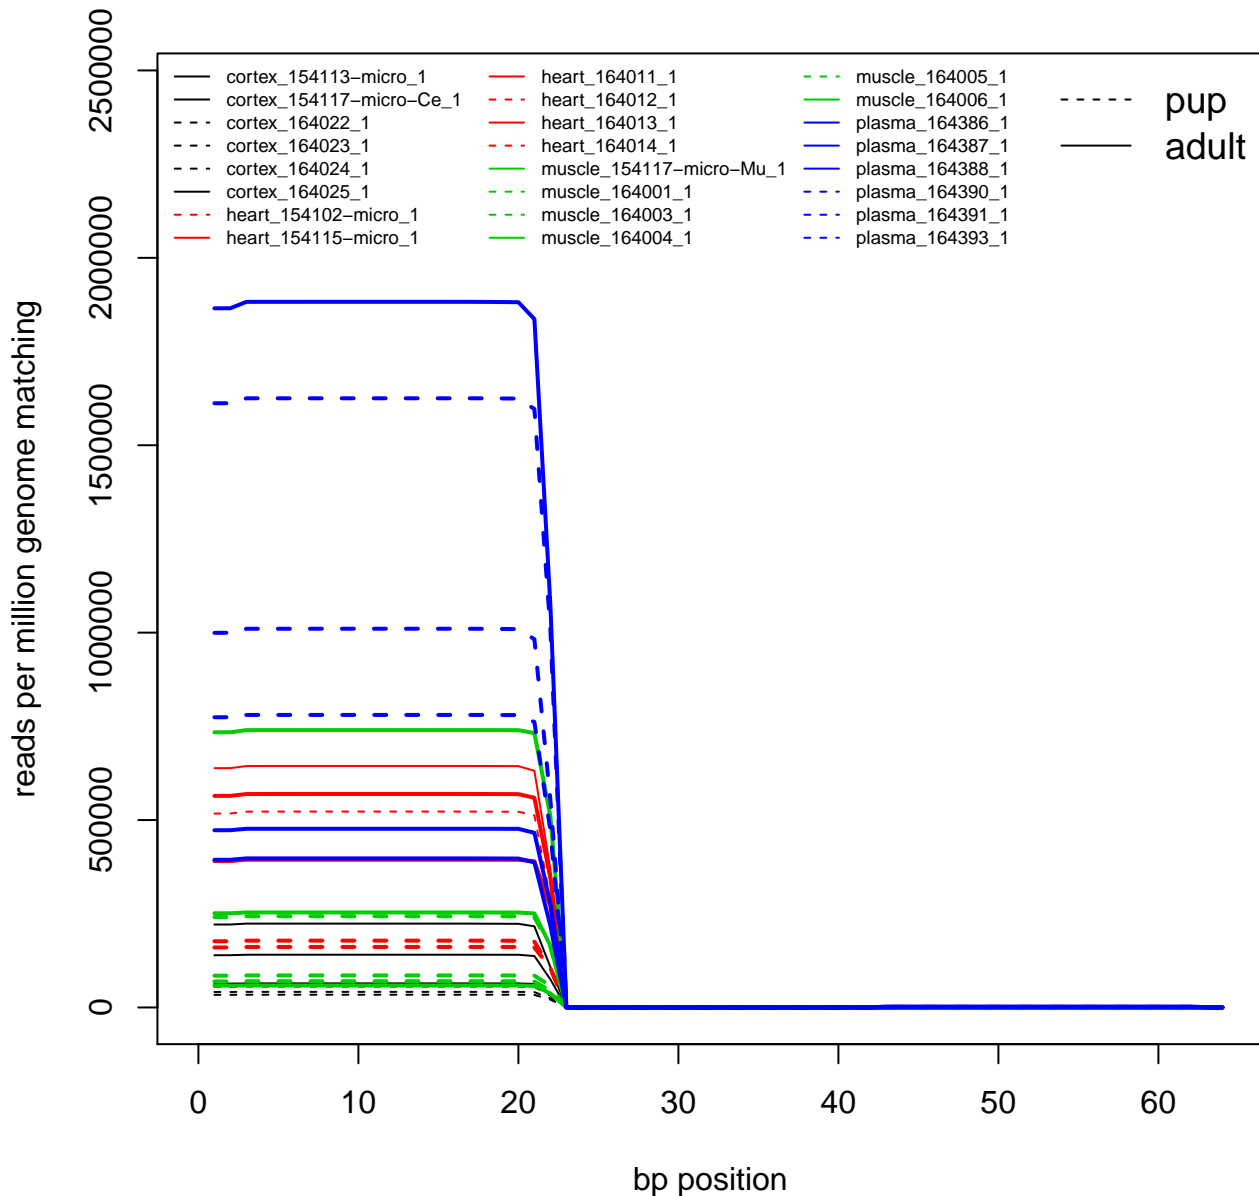



# lwe-miR-486\_miRDeep2\_loc2

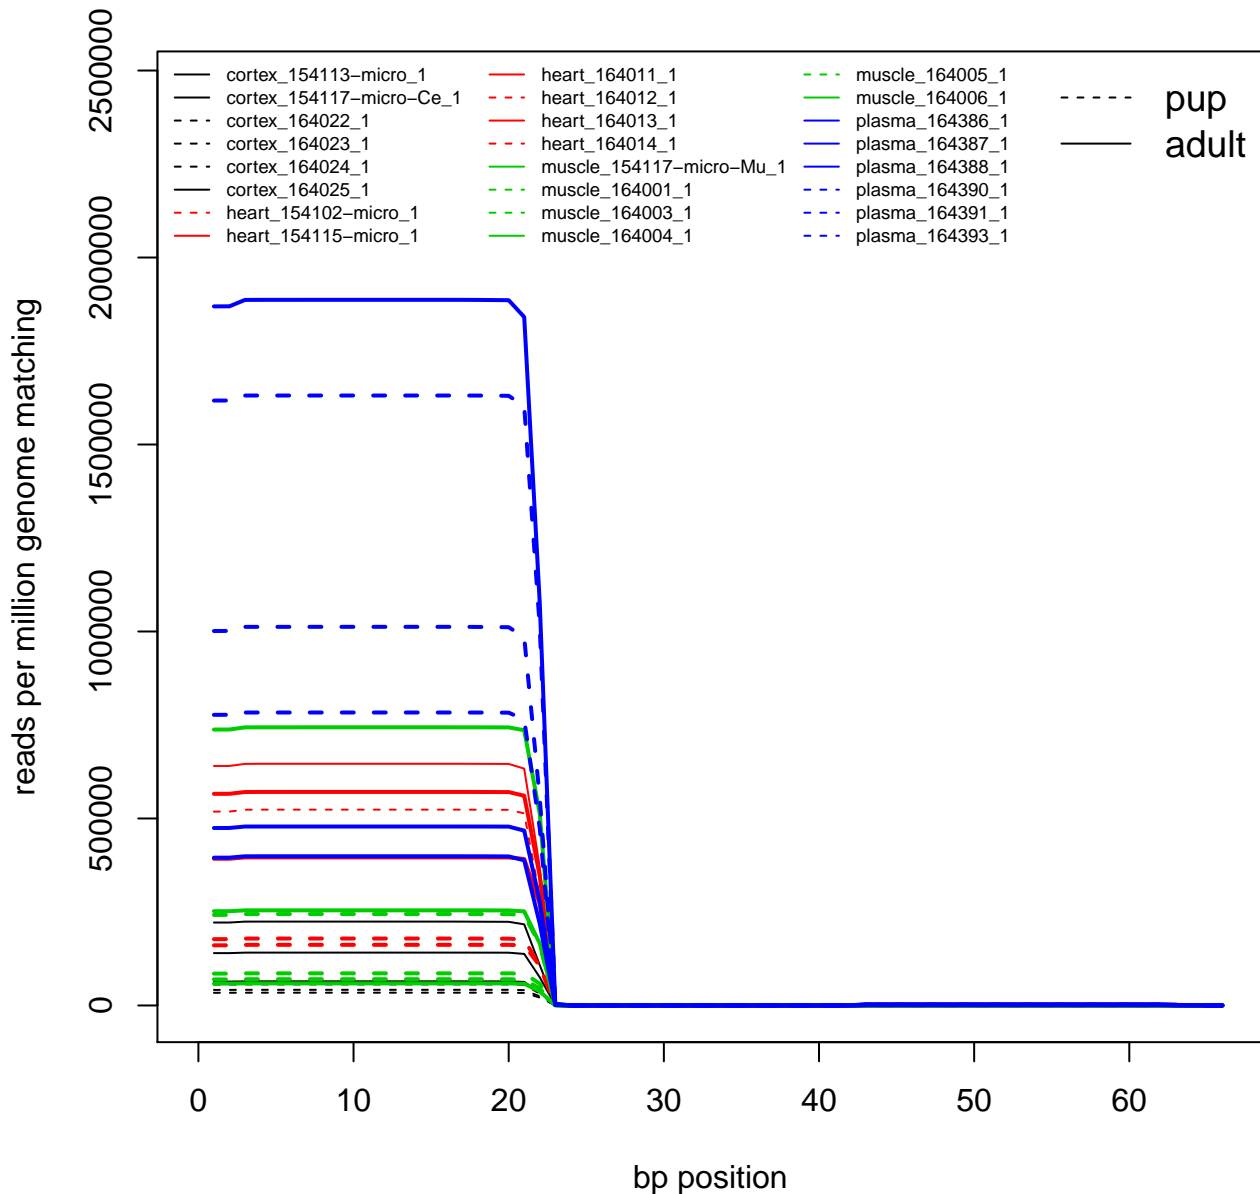

# WS\_miRDeep2\_novel\_87

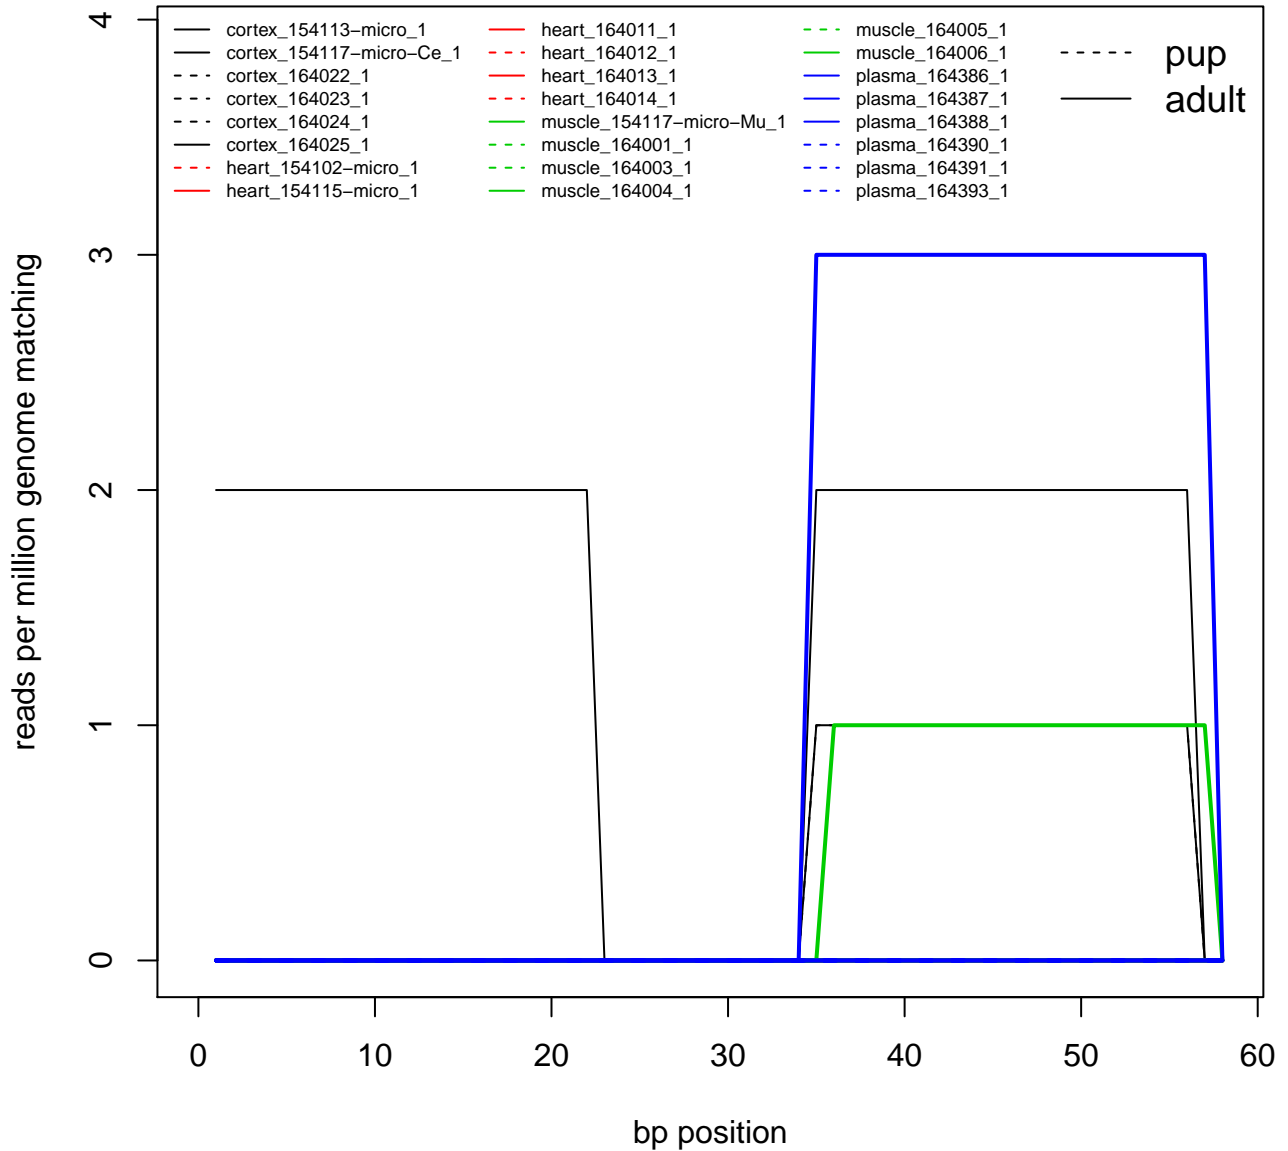

# lwe-miR-30e\_miRDeep2\_loc1

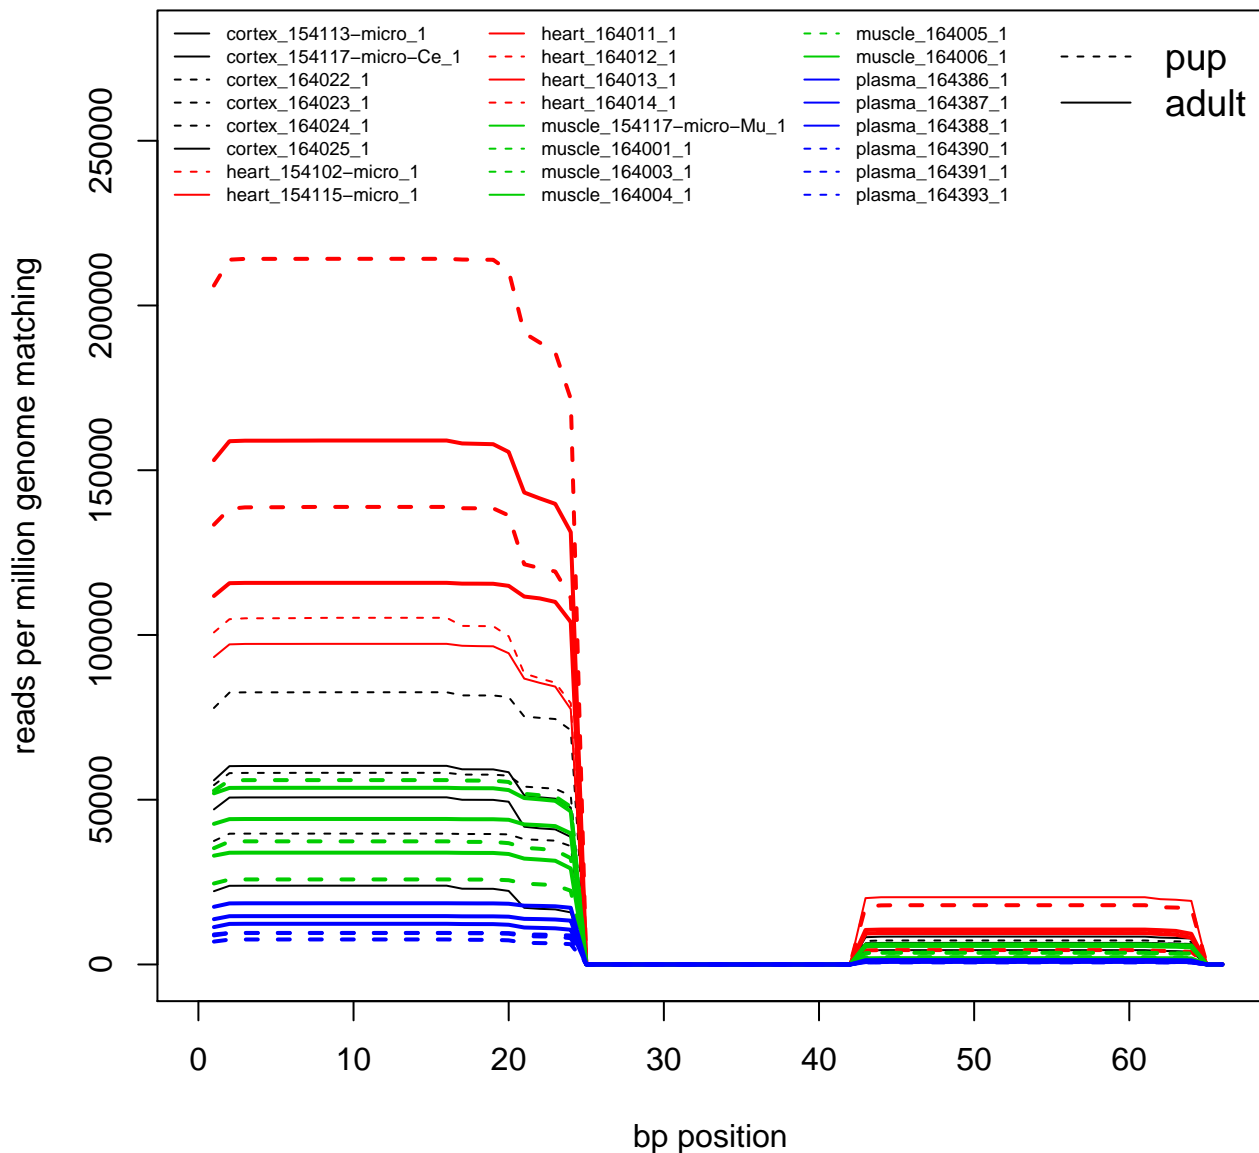

# lwe-miR-708\_miRDeep2\_loc1

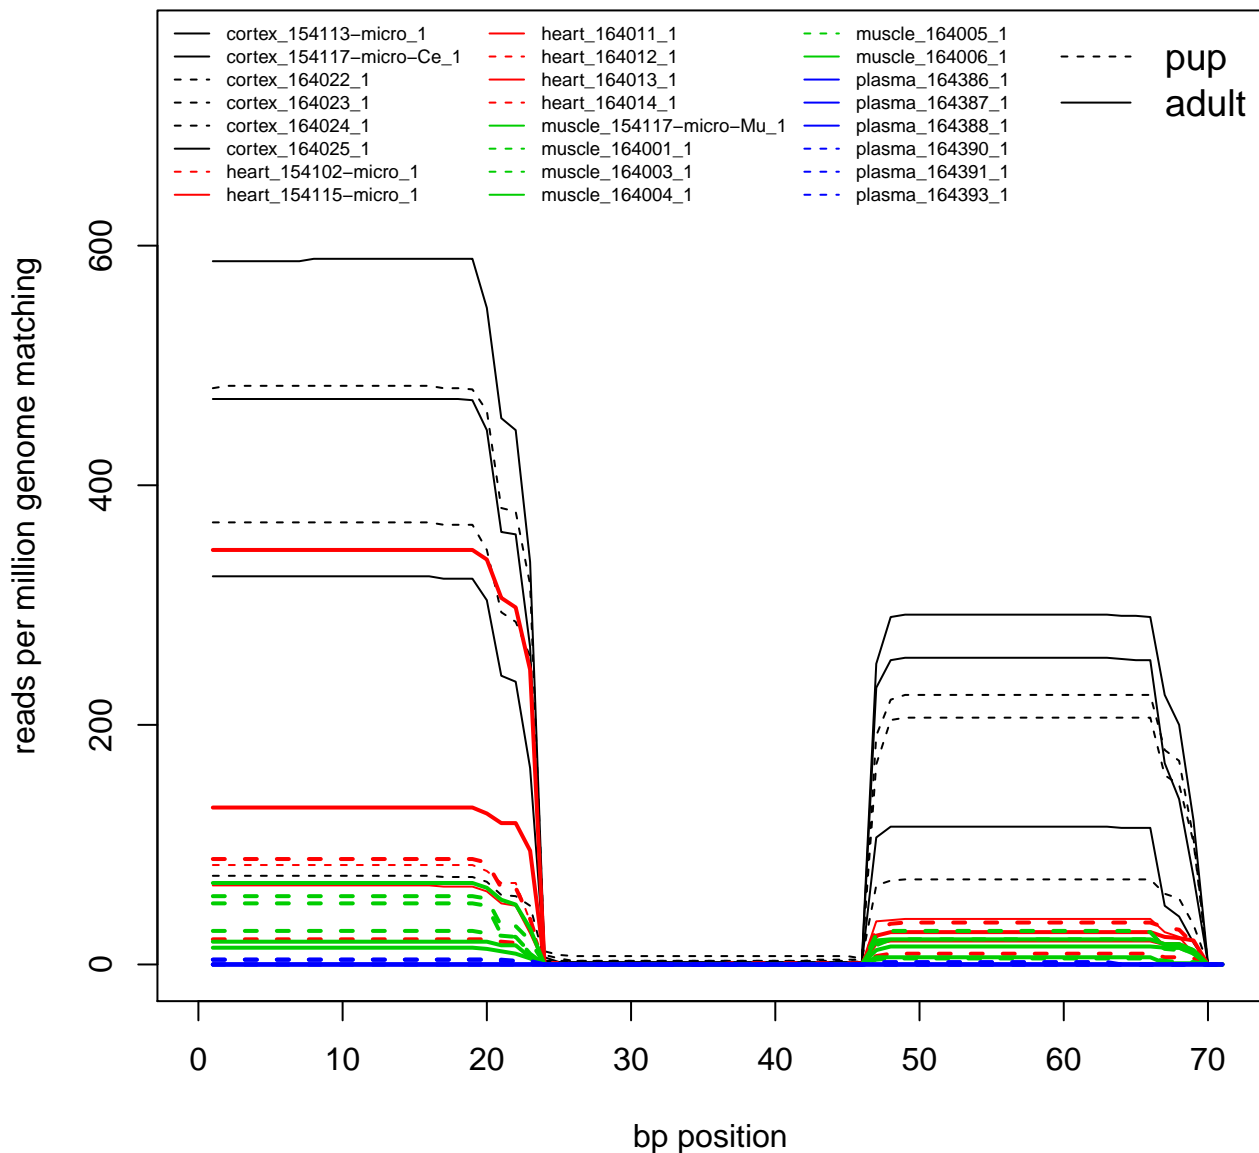

# lwe-miR-320\_miRDeep2\_loc1

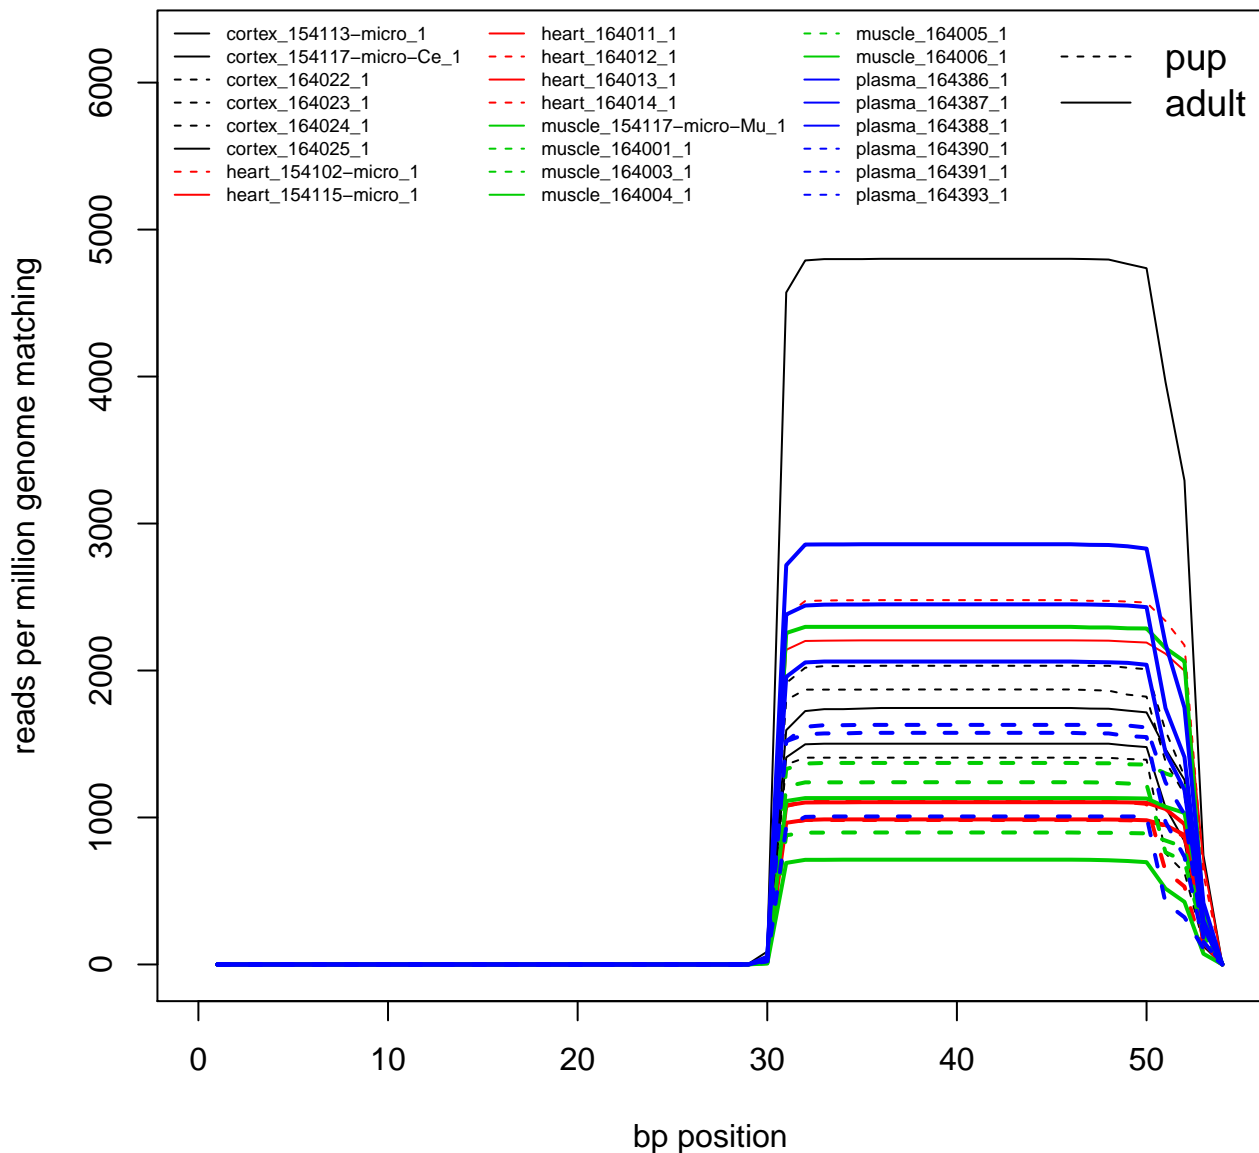

# WS\_miRDeep2\_novel\_88

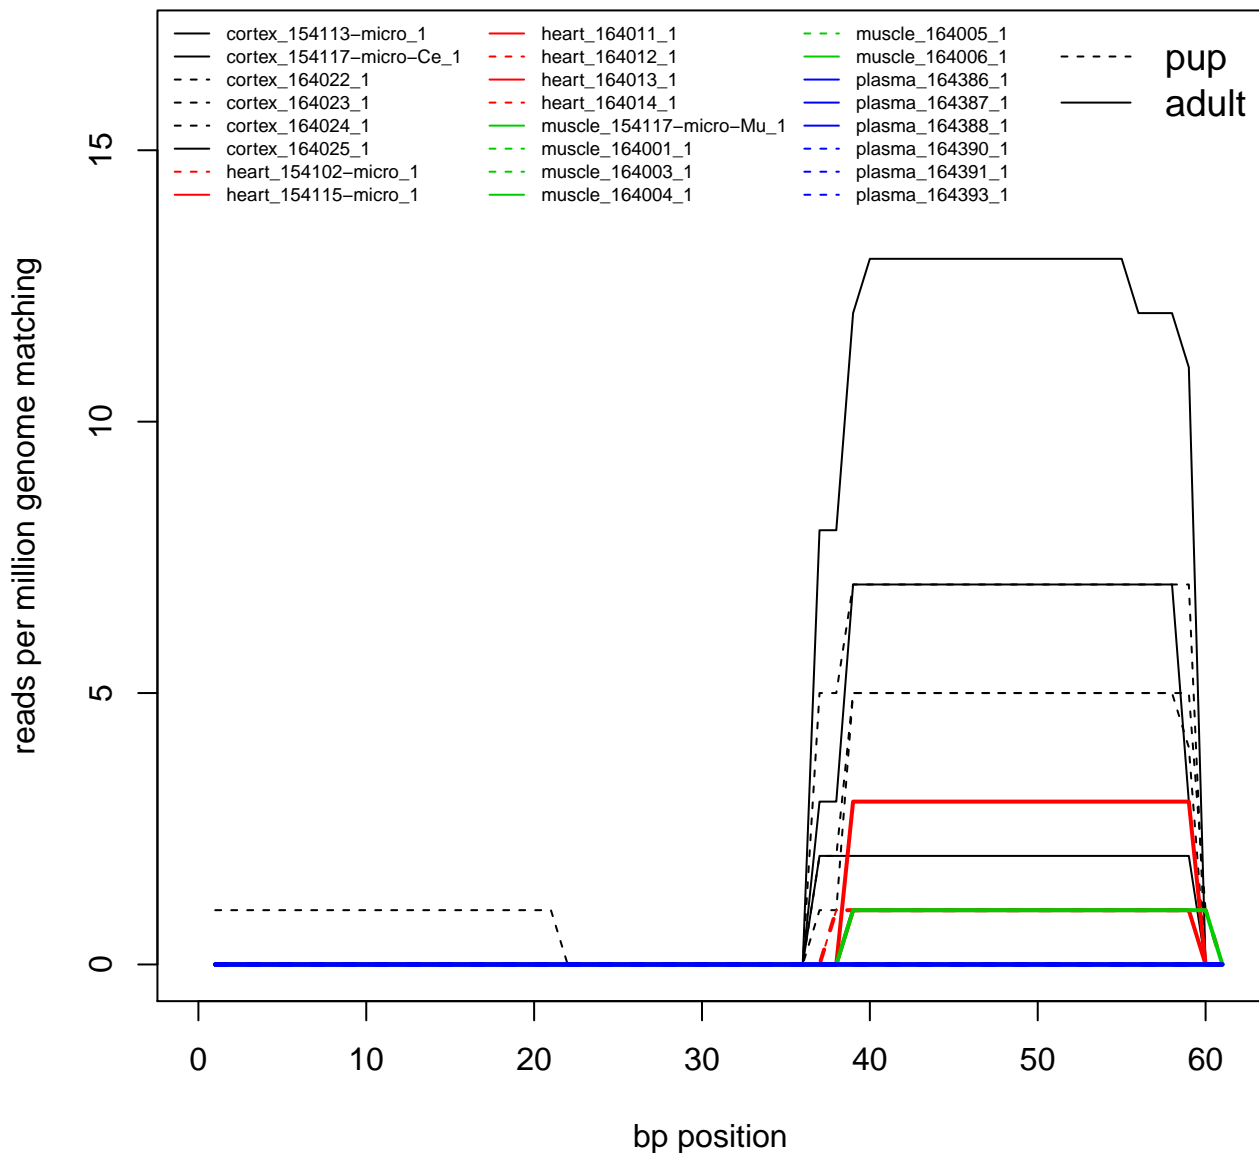

# WS\_miRDeep2\_novel\_89

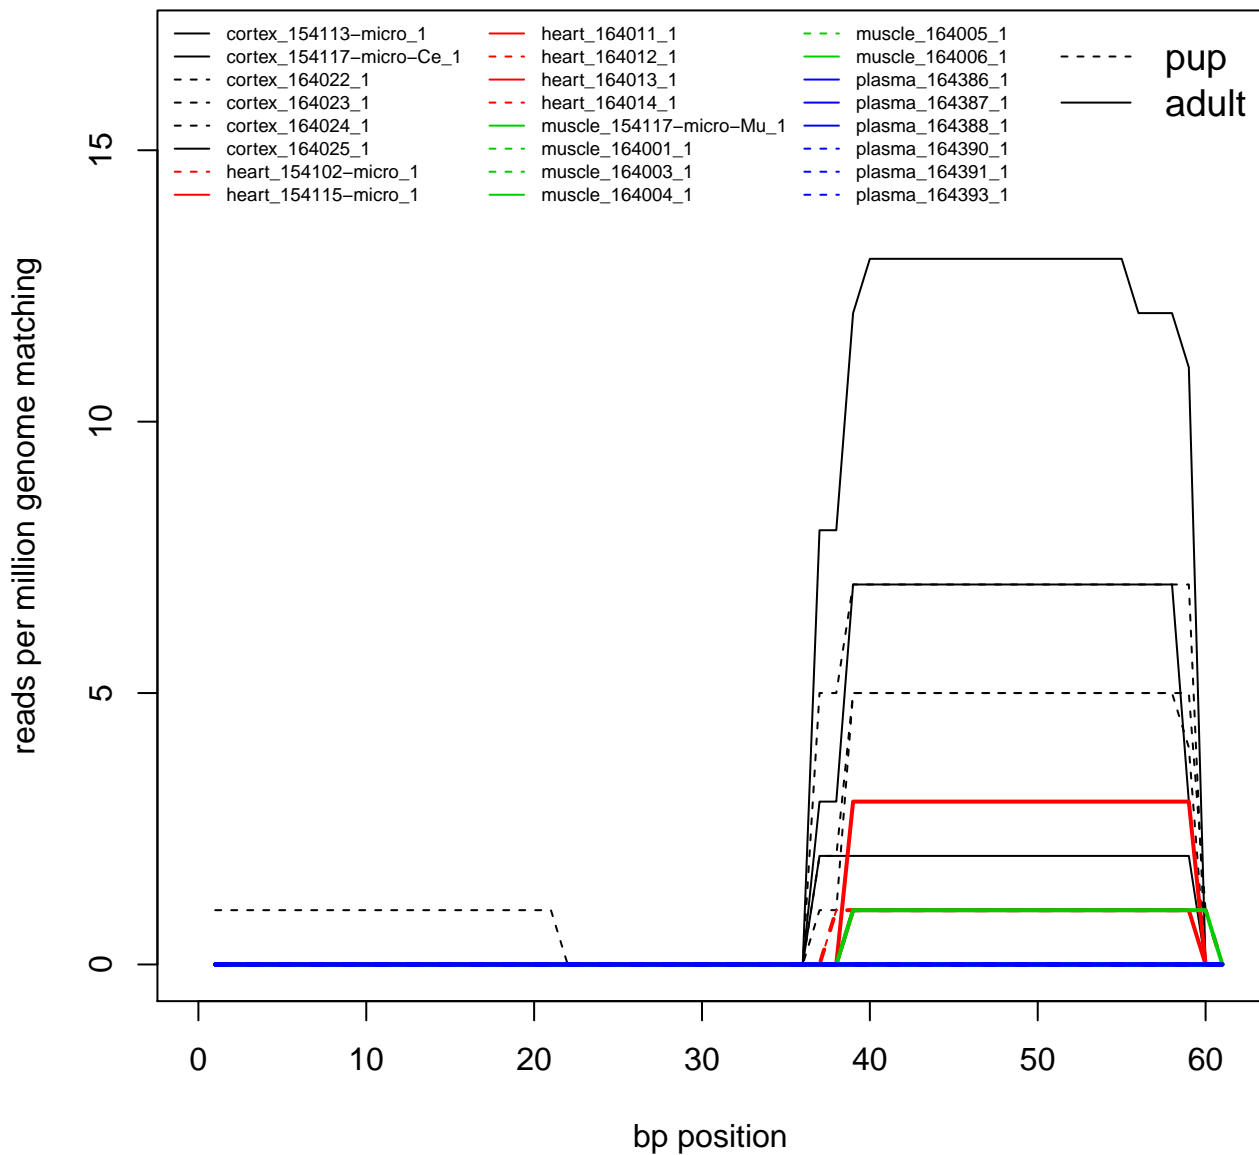

# lwe-miR-3065;lwe-miR-338\_loc1

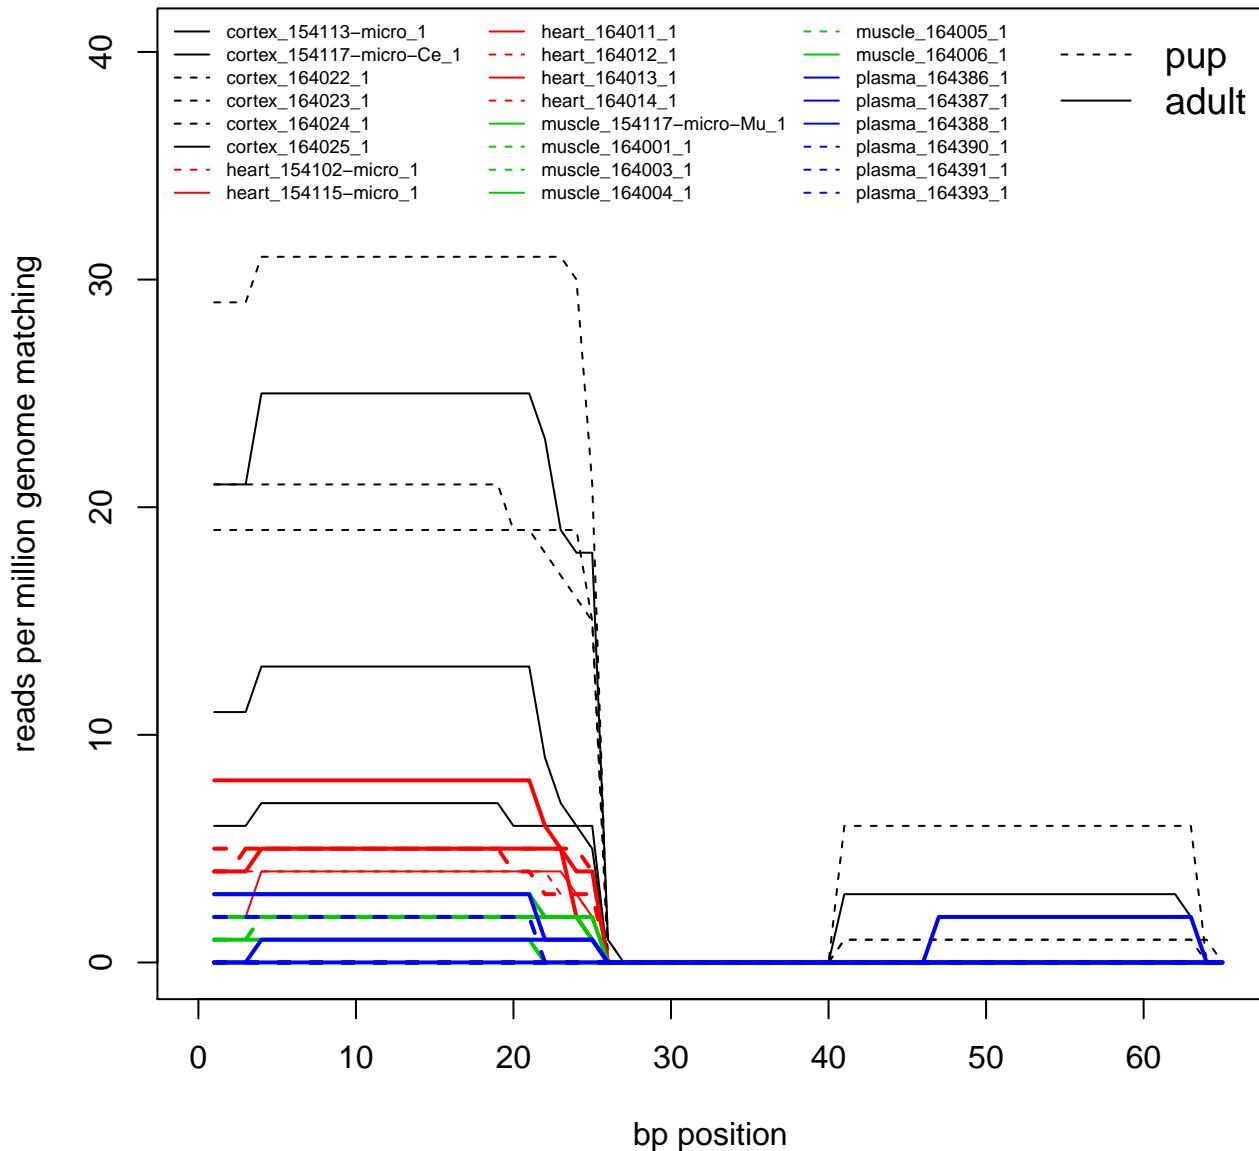



# lwe-miR-652\_miRDeep2\_loc1

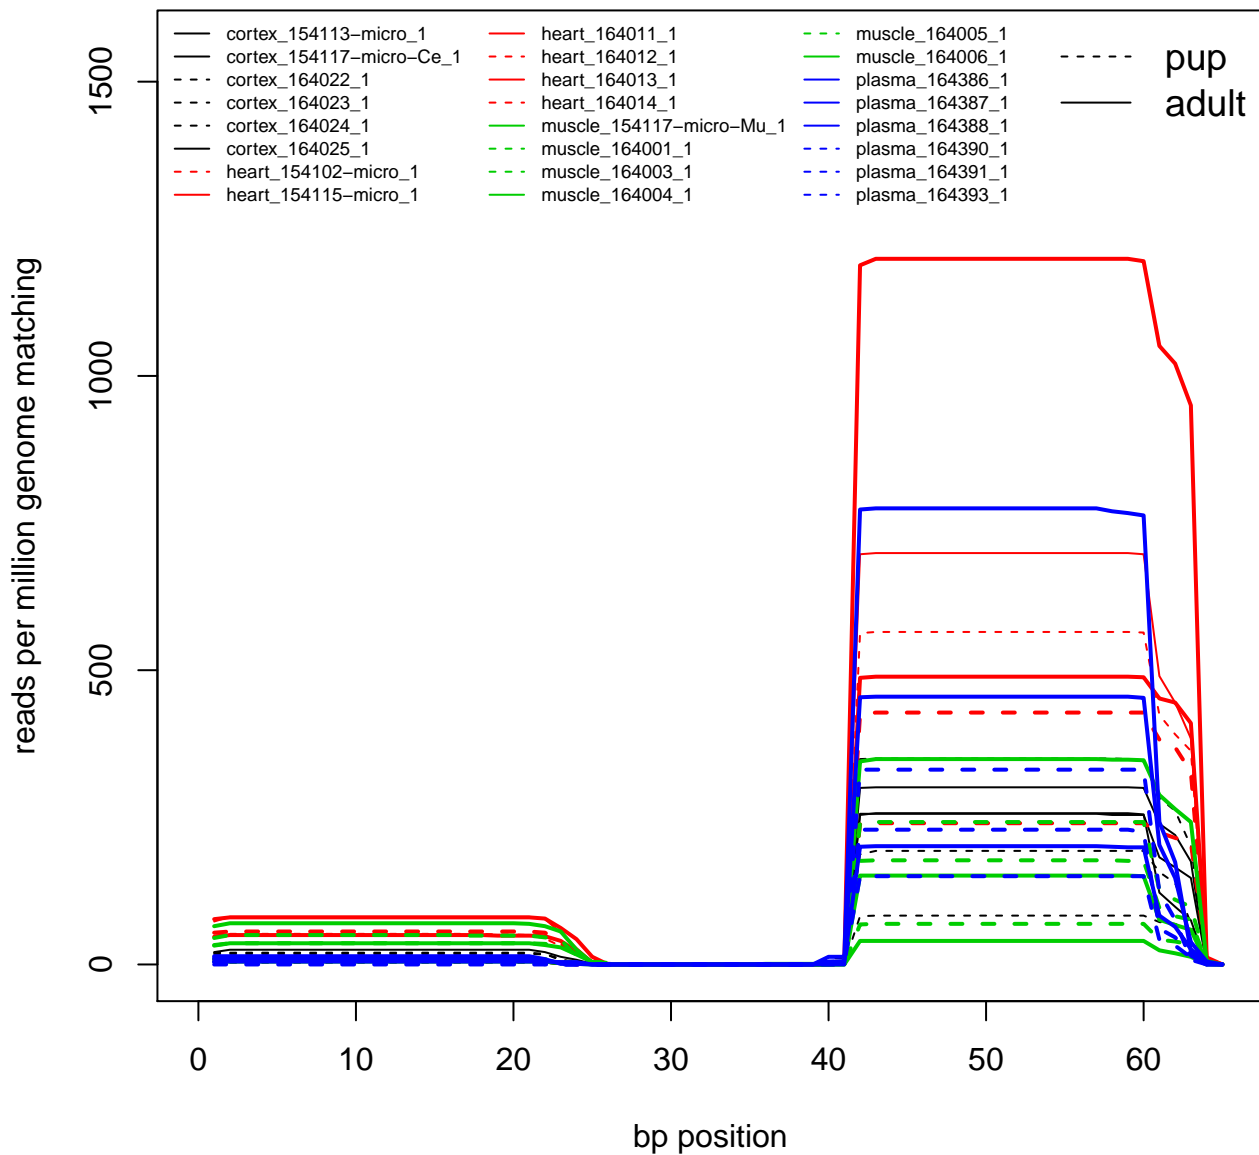

# lwe-miR-129\_loc2

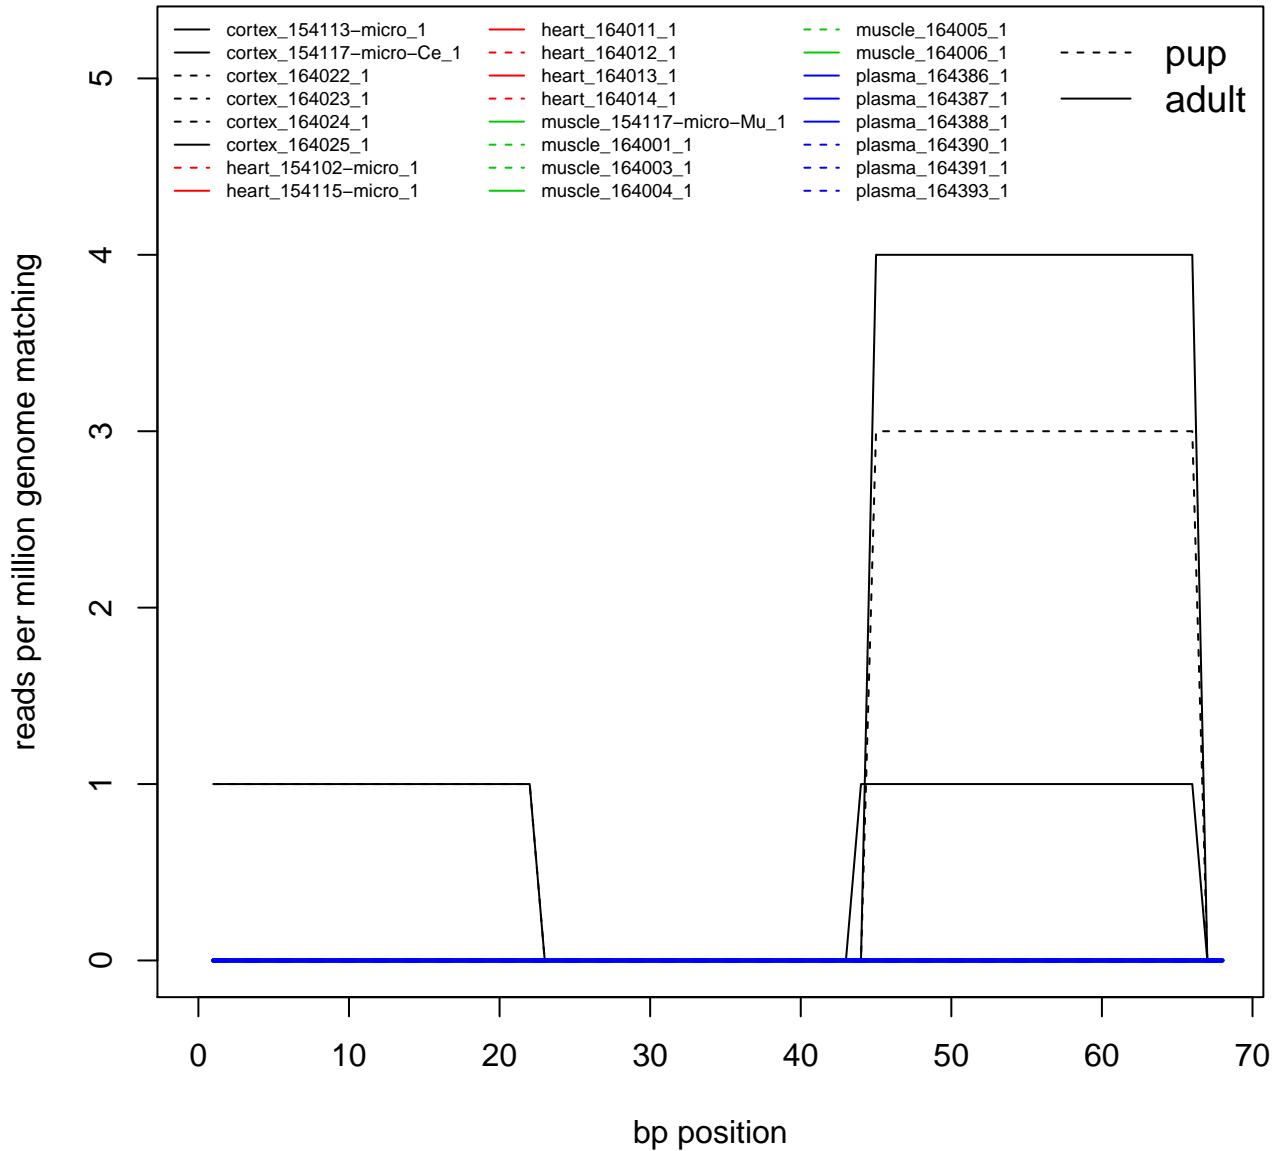

# lwe-miR-342\_miRDeep2\_loc1

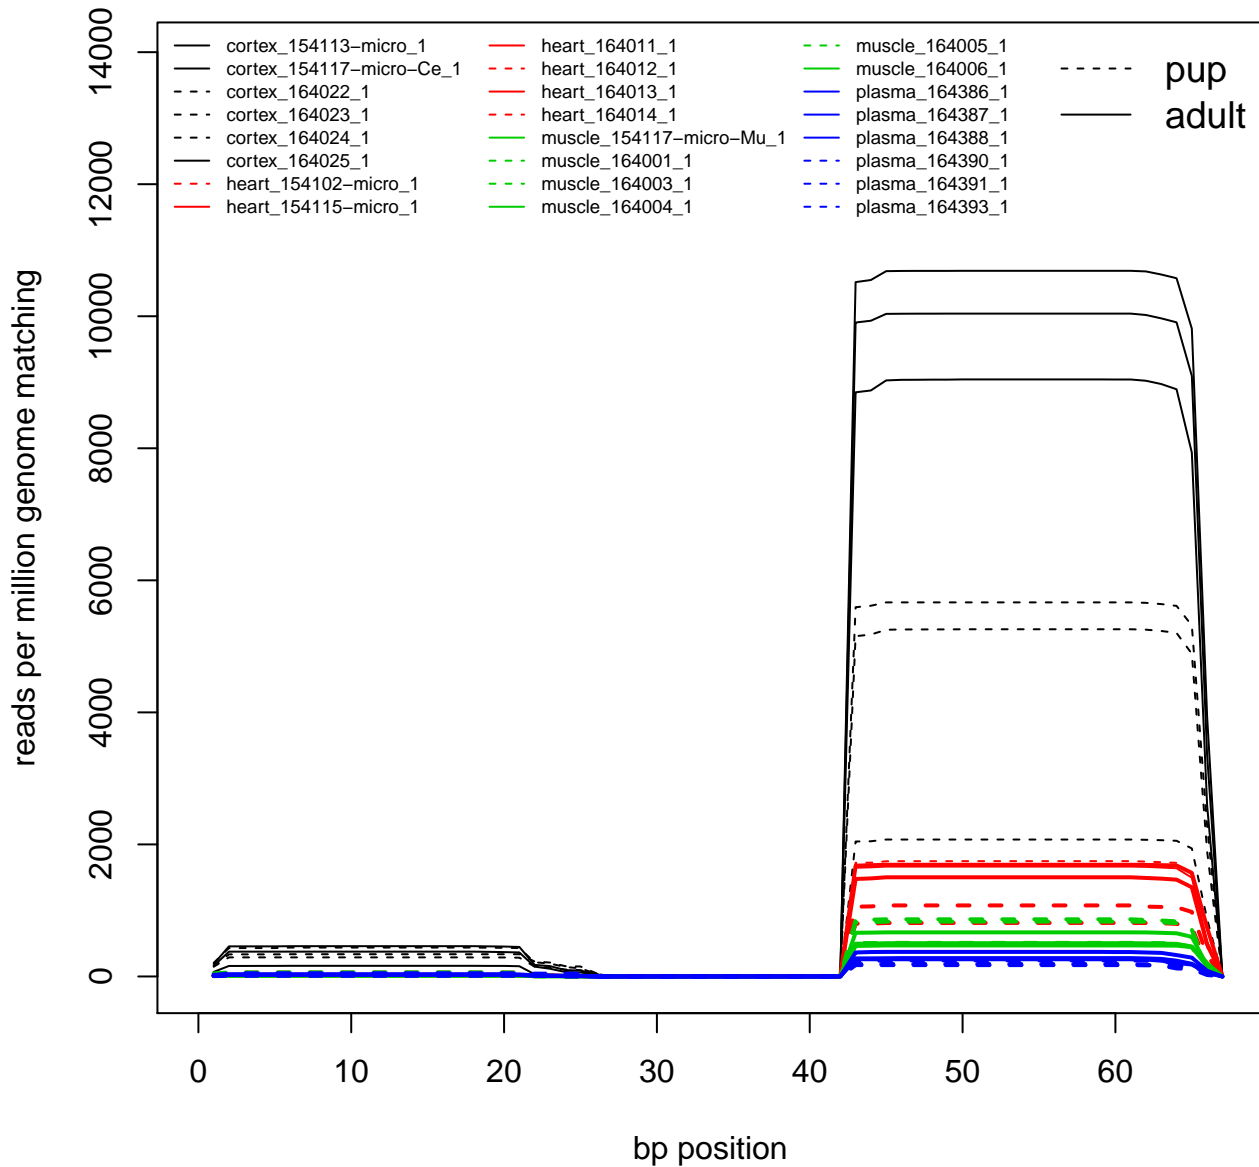

# WS\_miRDeep2\_novel\_92

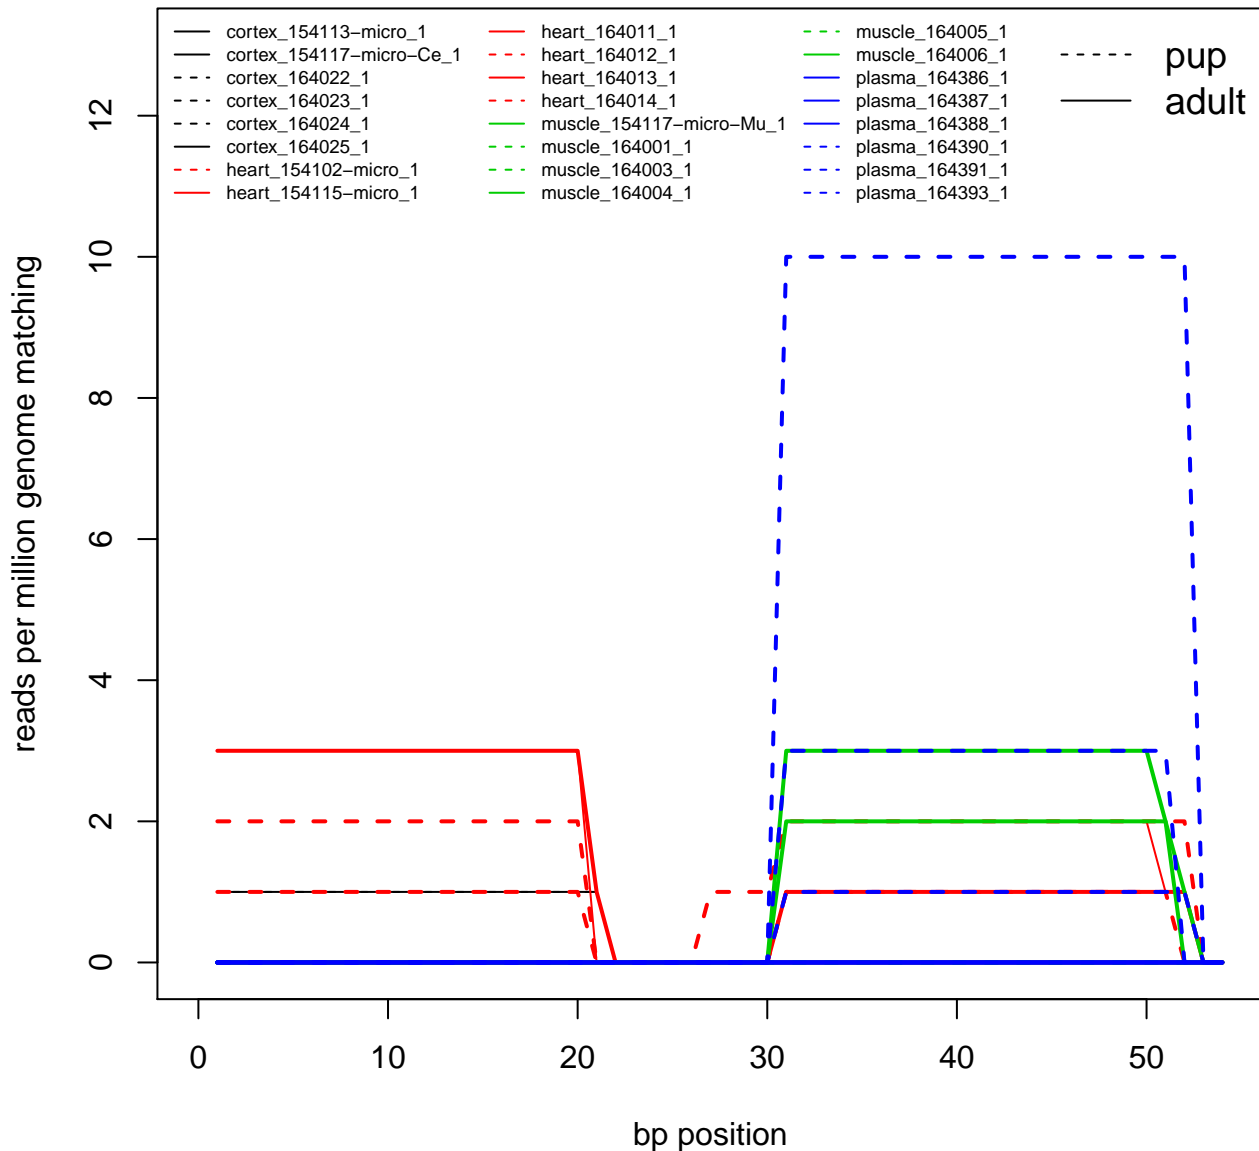

# WS\_miRDeep2\_novel\_93

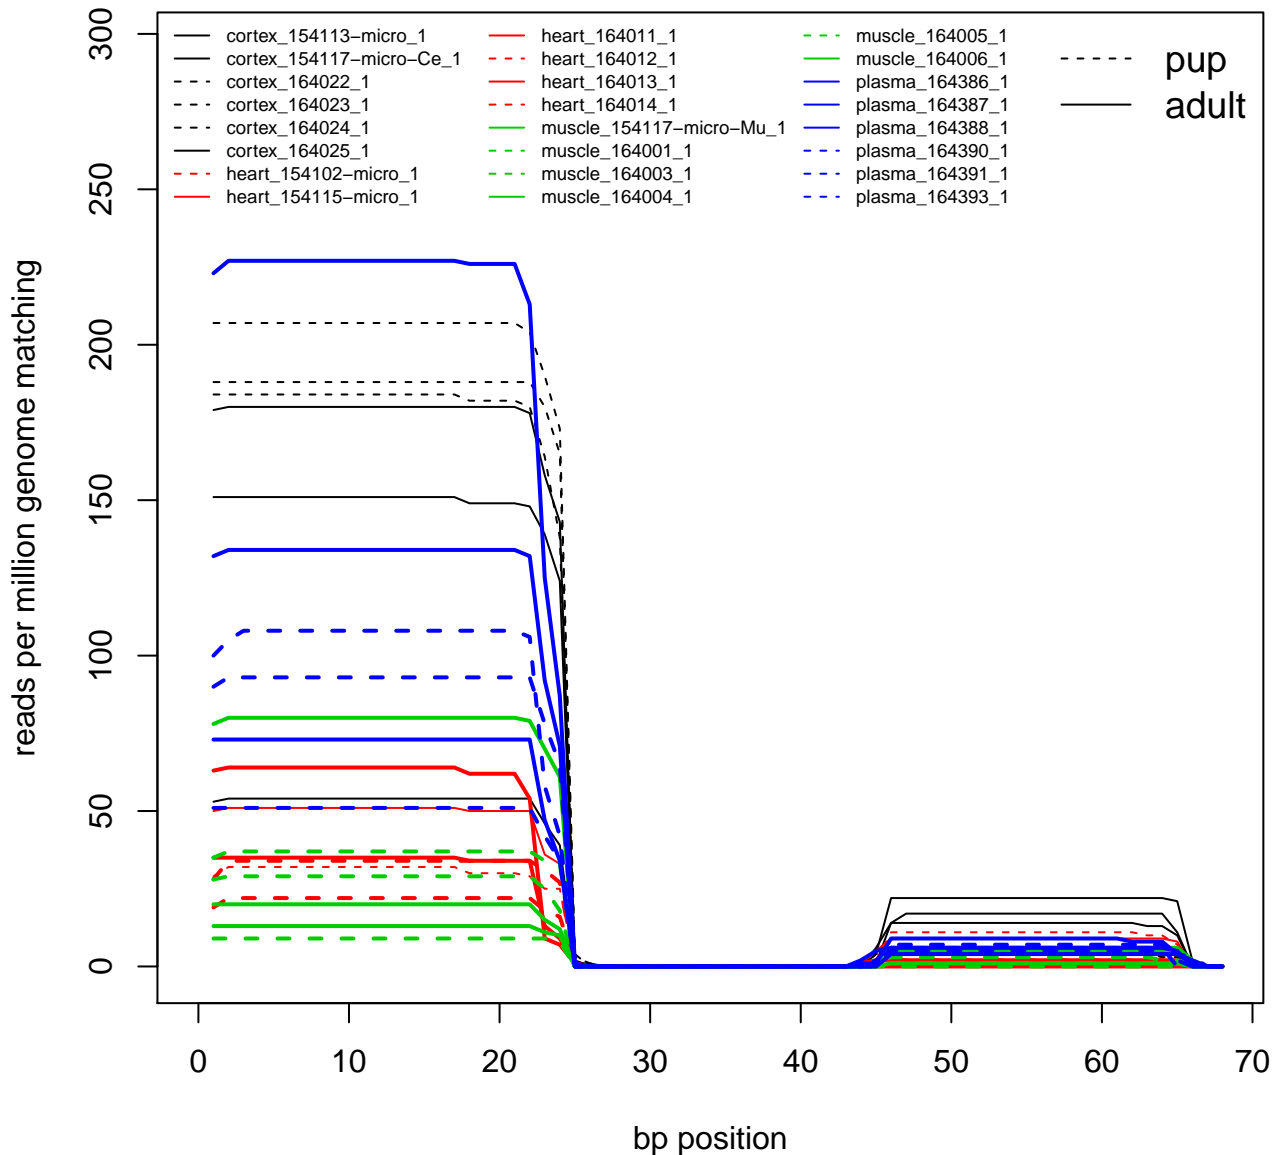

# WS\_miRDeep2\_novel\_94

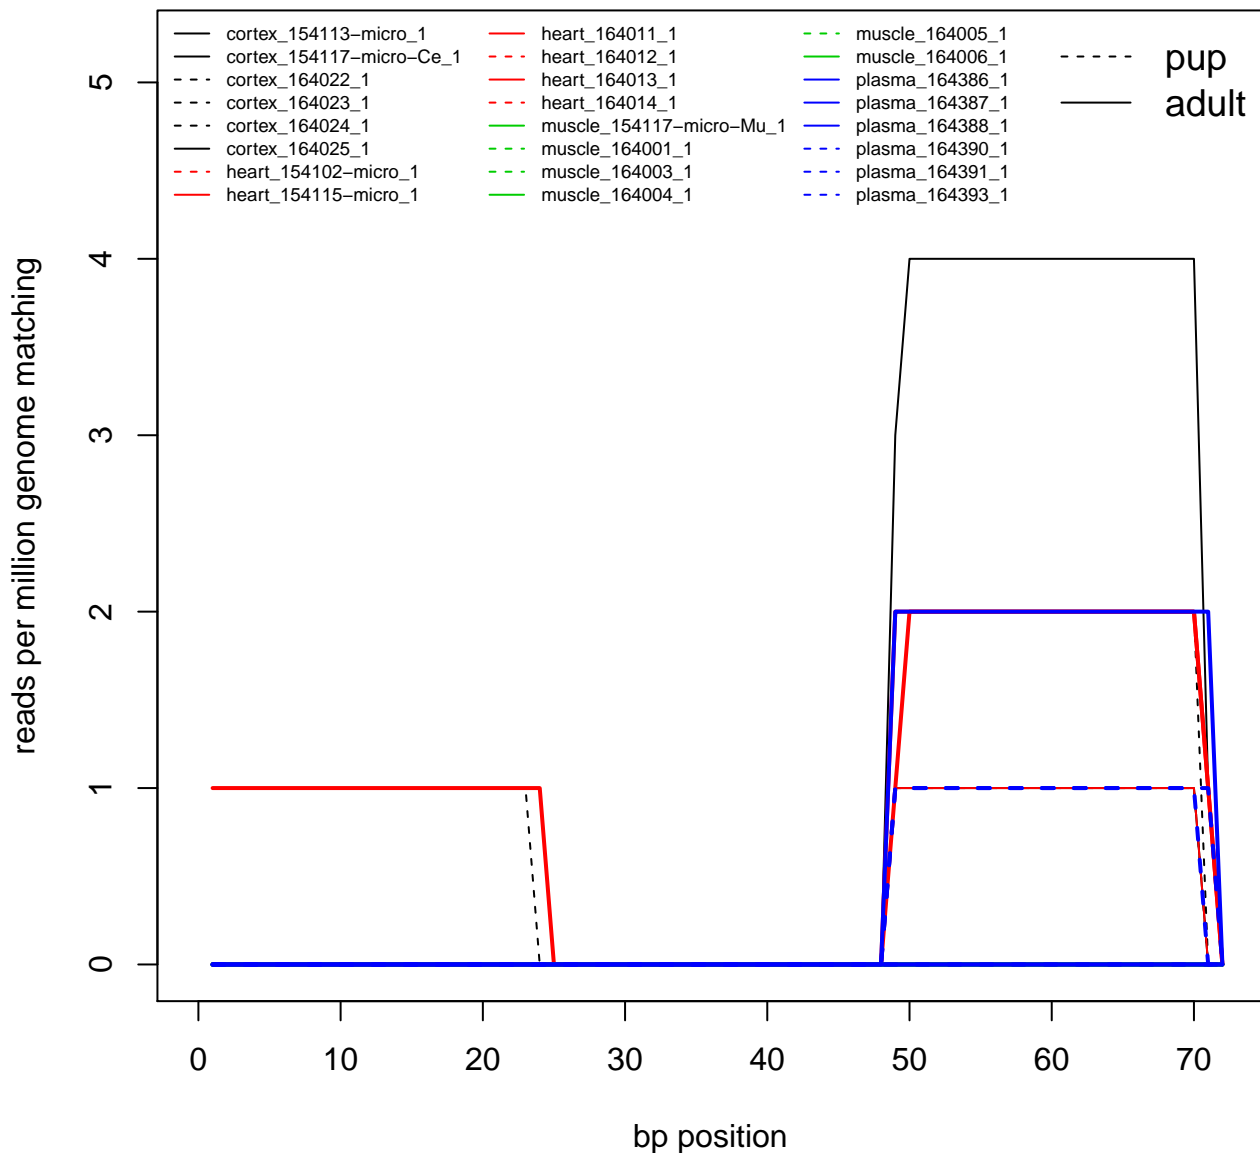

# lwe-miR-30d\_miRDeep2\_loc1

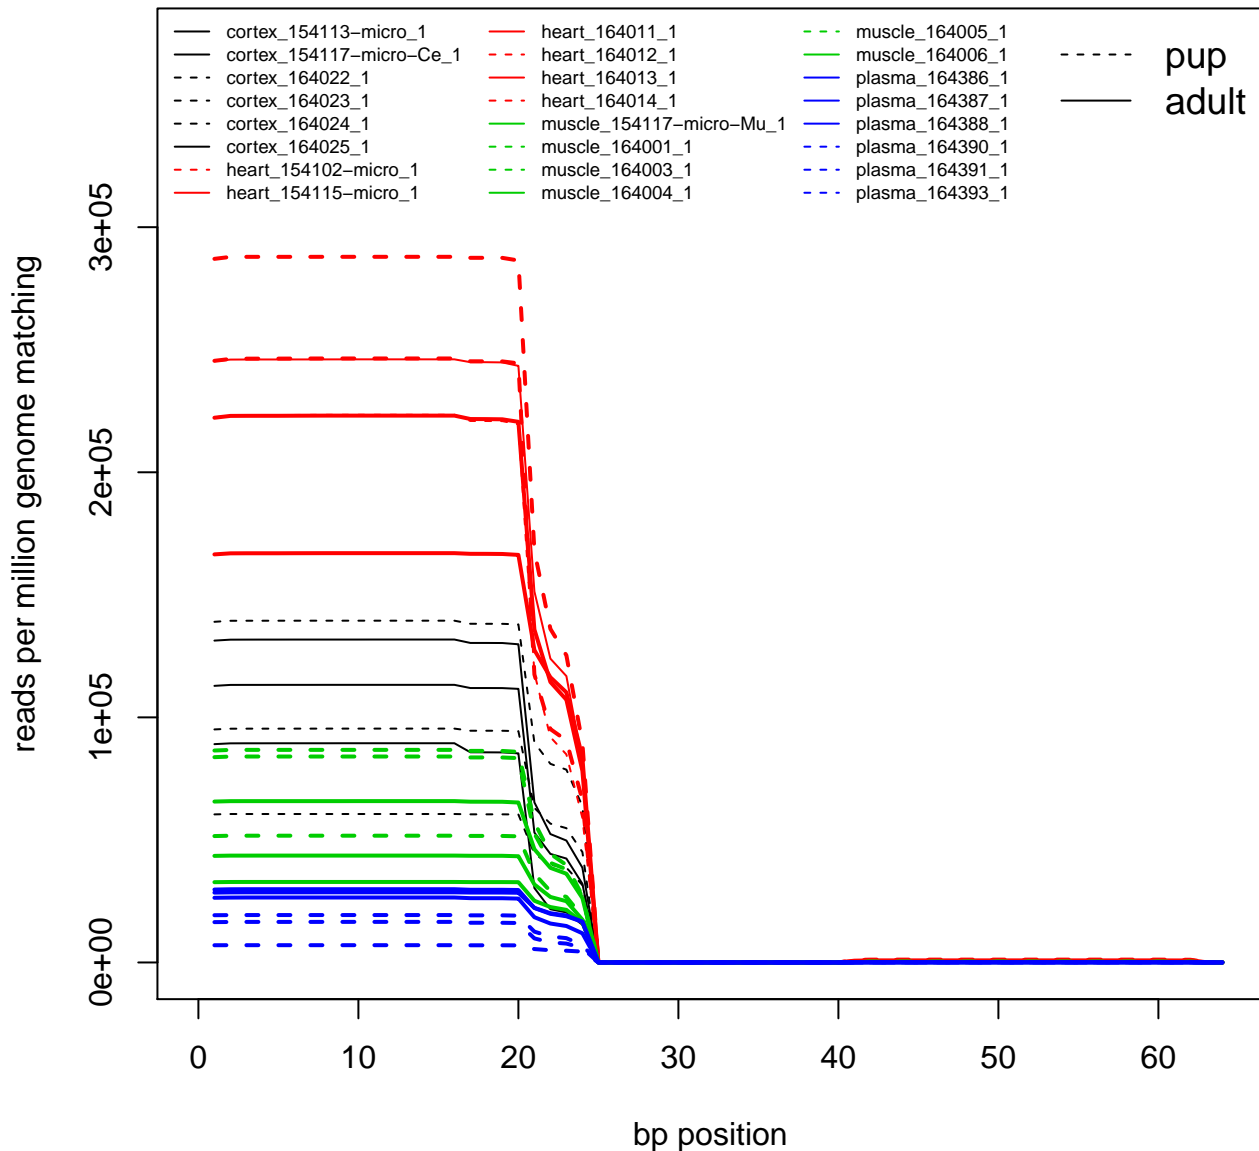





# lwe-miR-219\_loc1

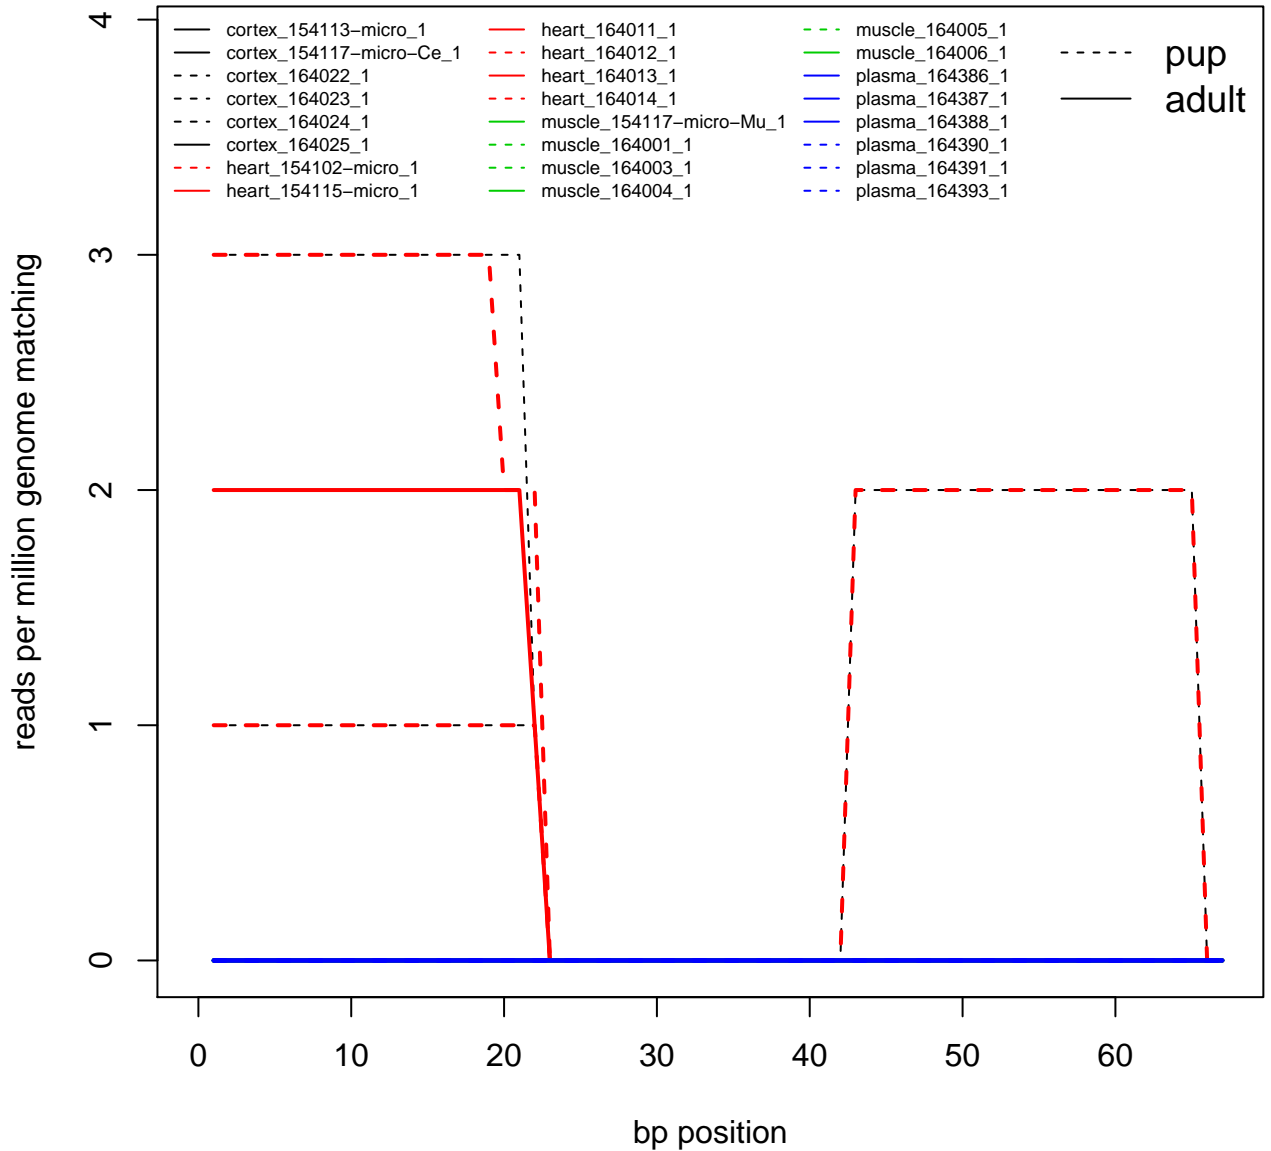

# WS\_miRDeep2\_novel\_97

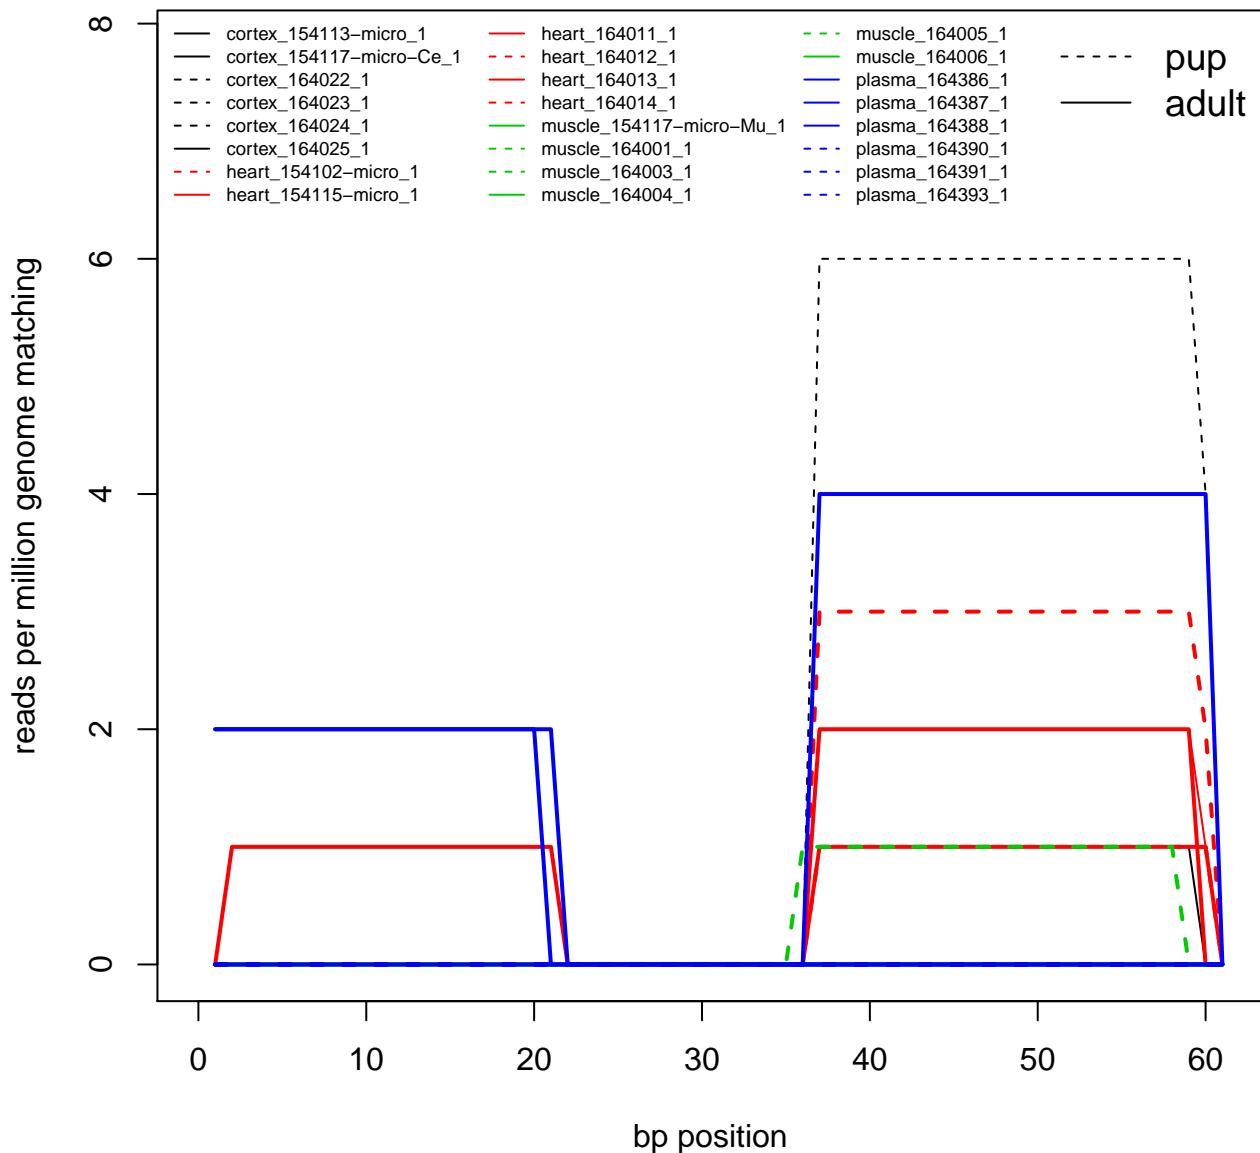

# WS\_miRDeep2\_novel\_98

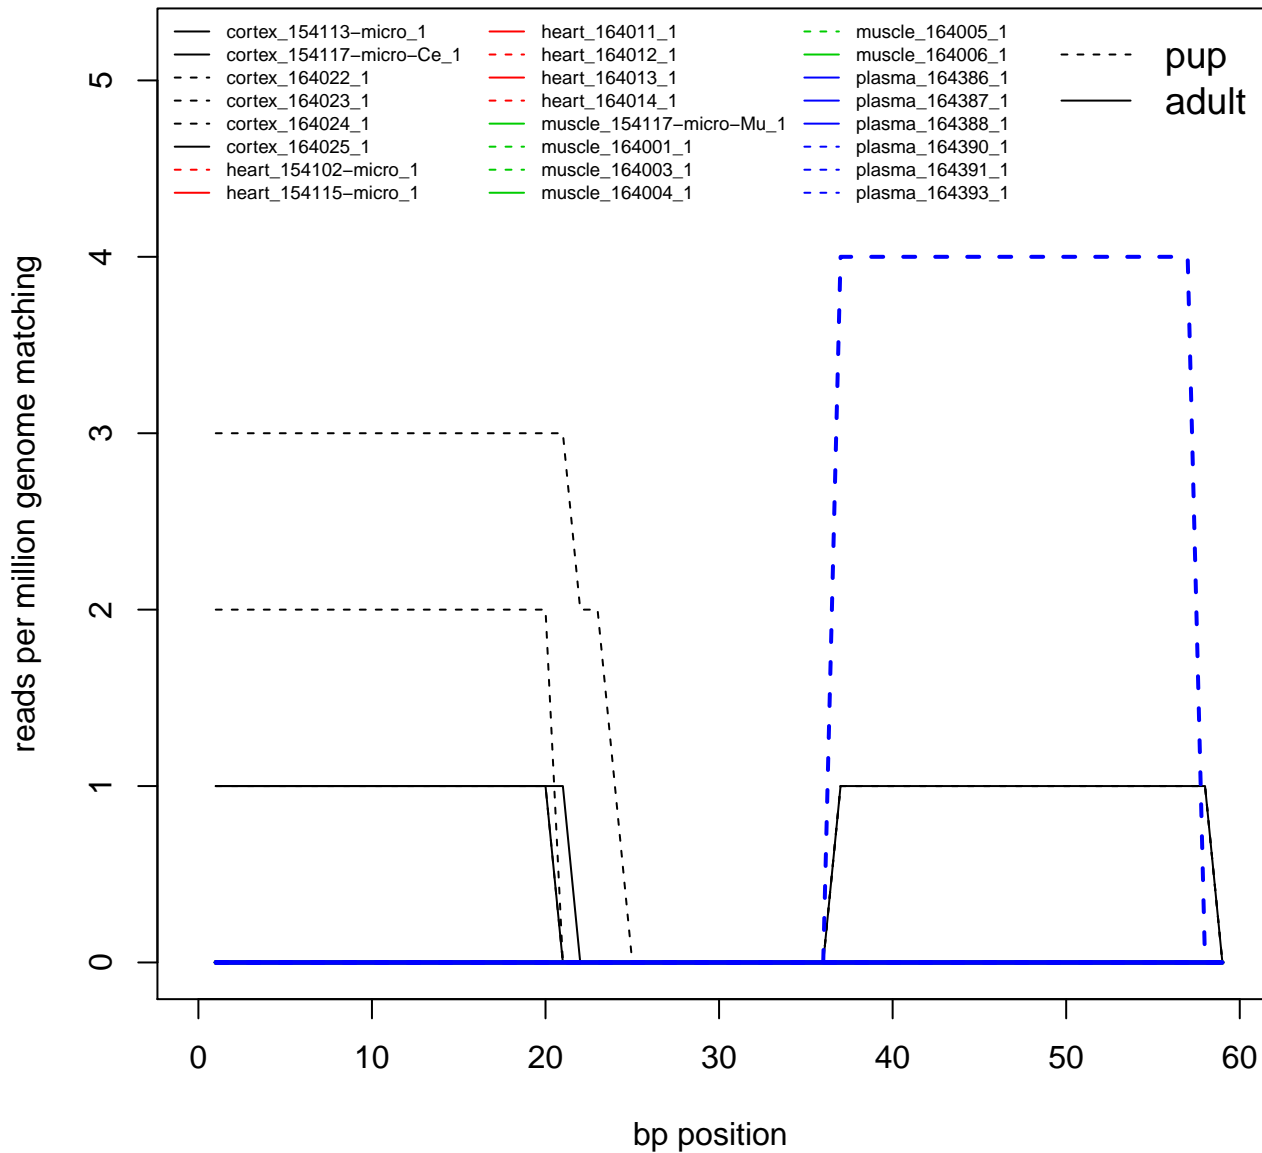

# WS\_miRDeep2\_novel\_99

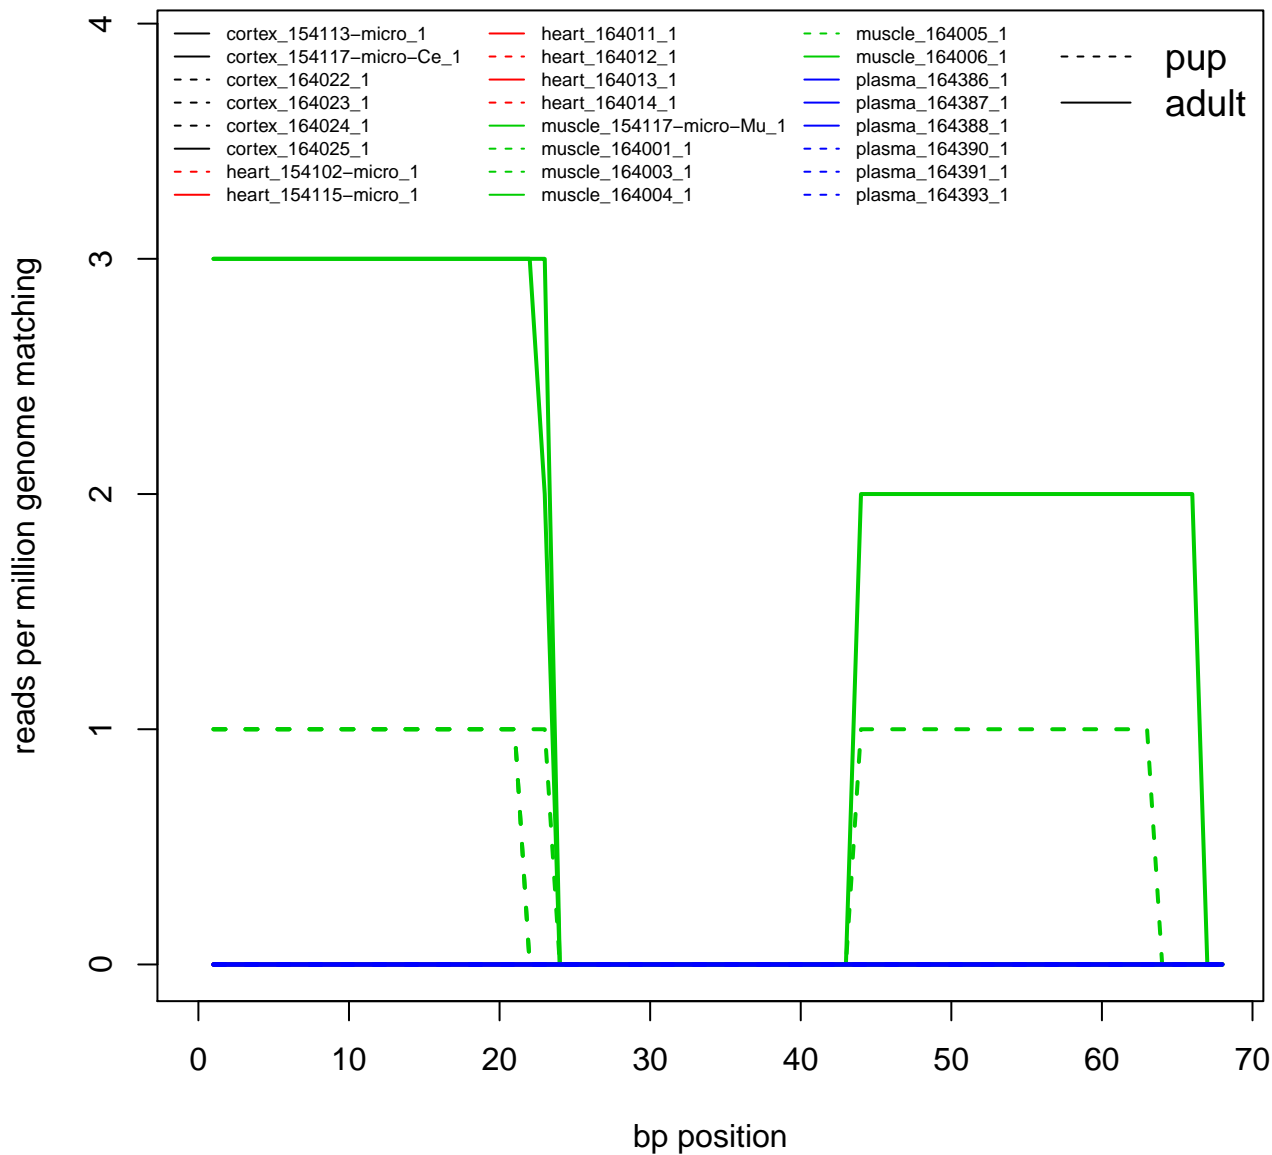

# WS\_miRDeep2\_novel\_100

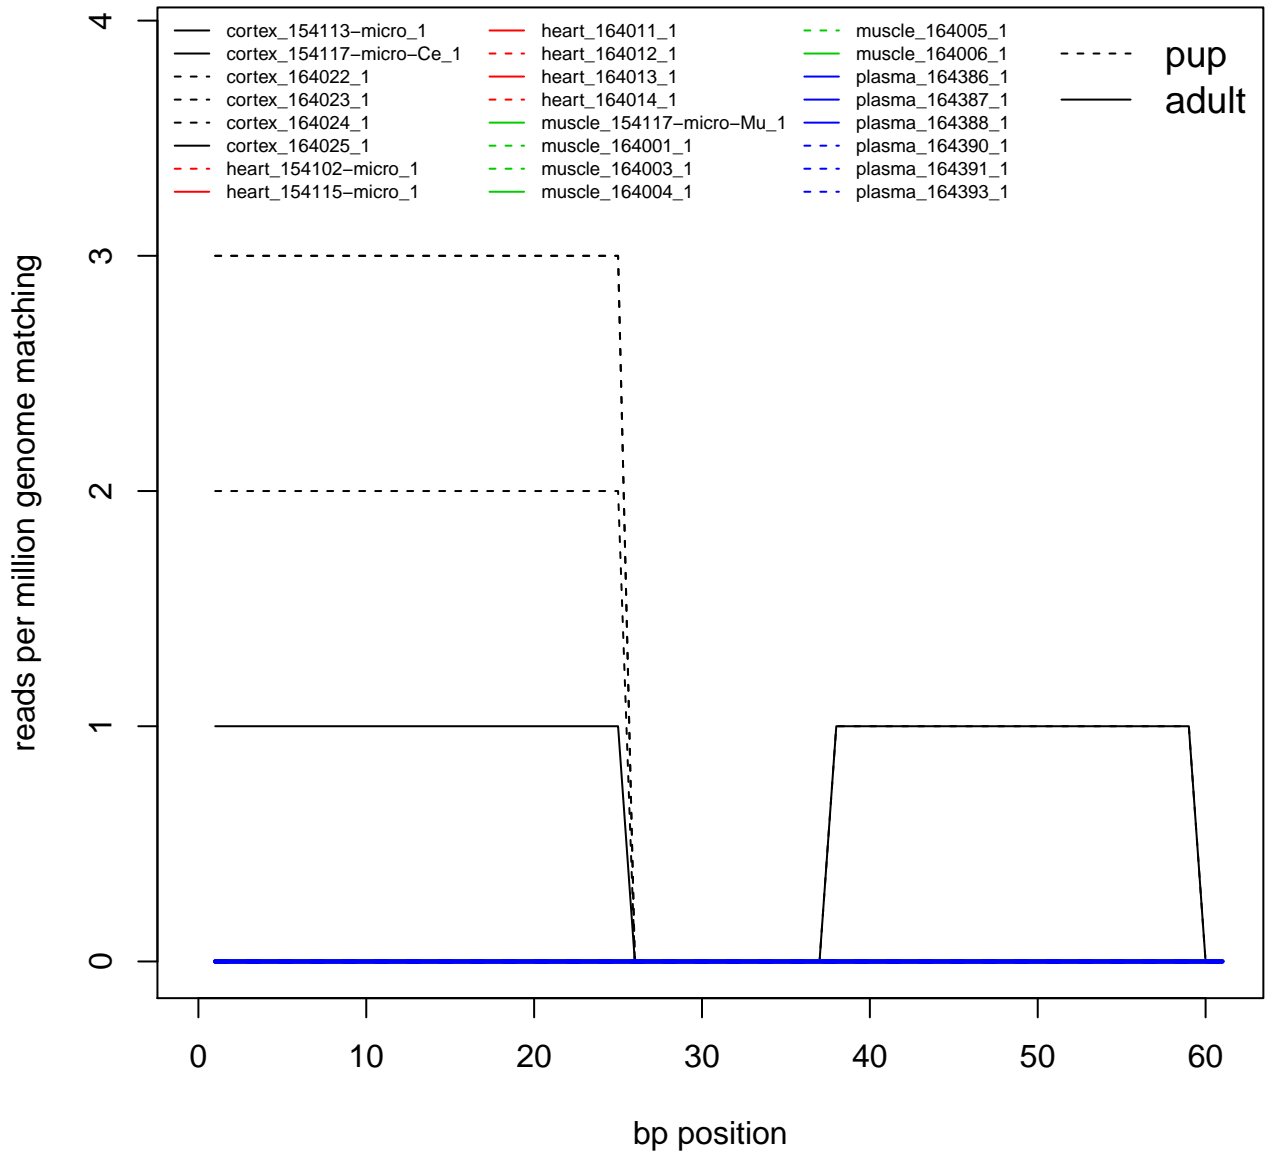



# WS\_miRDeep2\_novel\_102

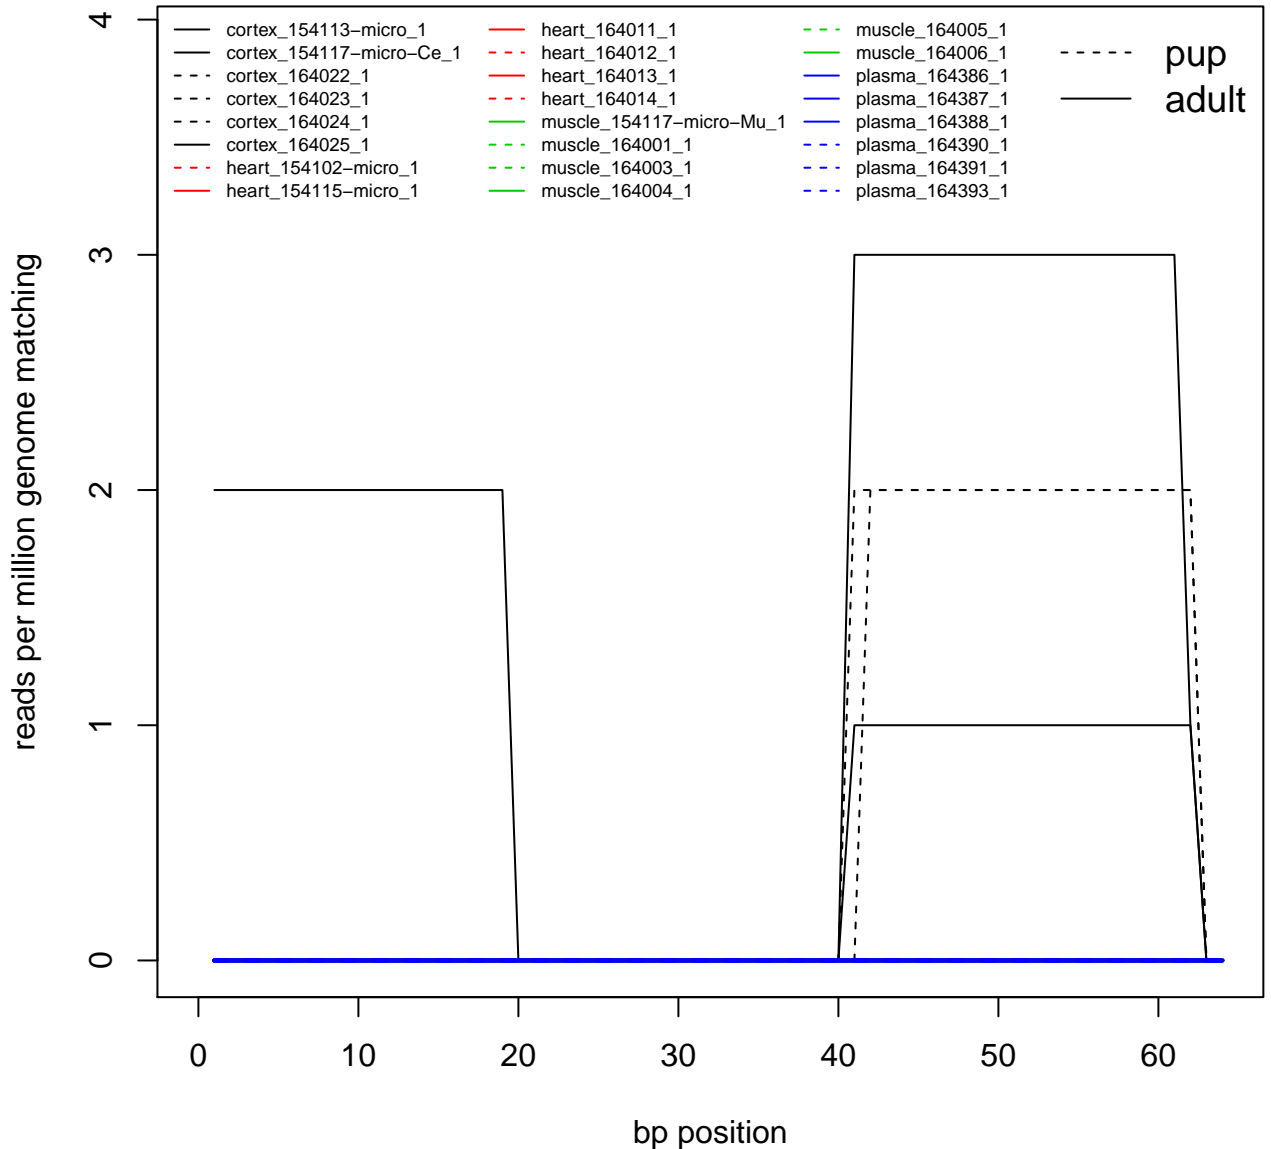

# lwe-miR-299\_loc1

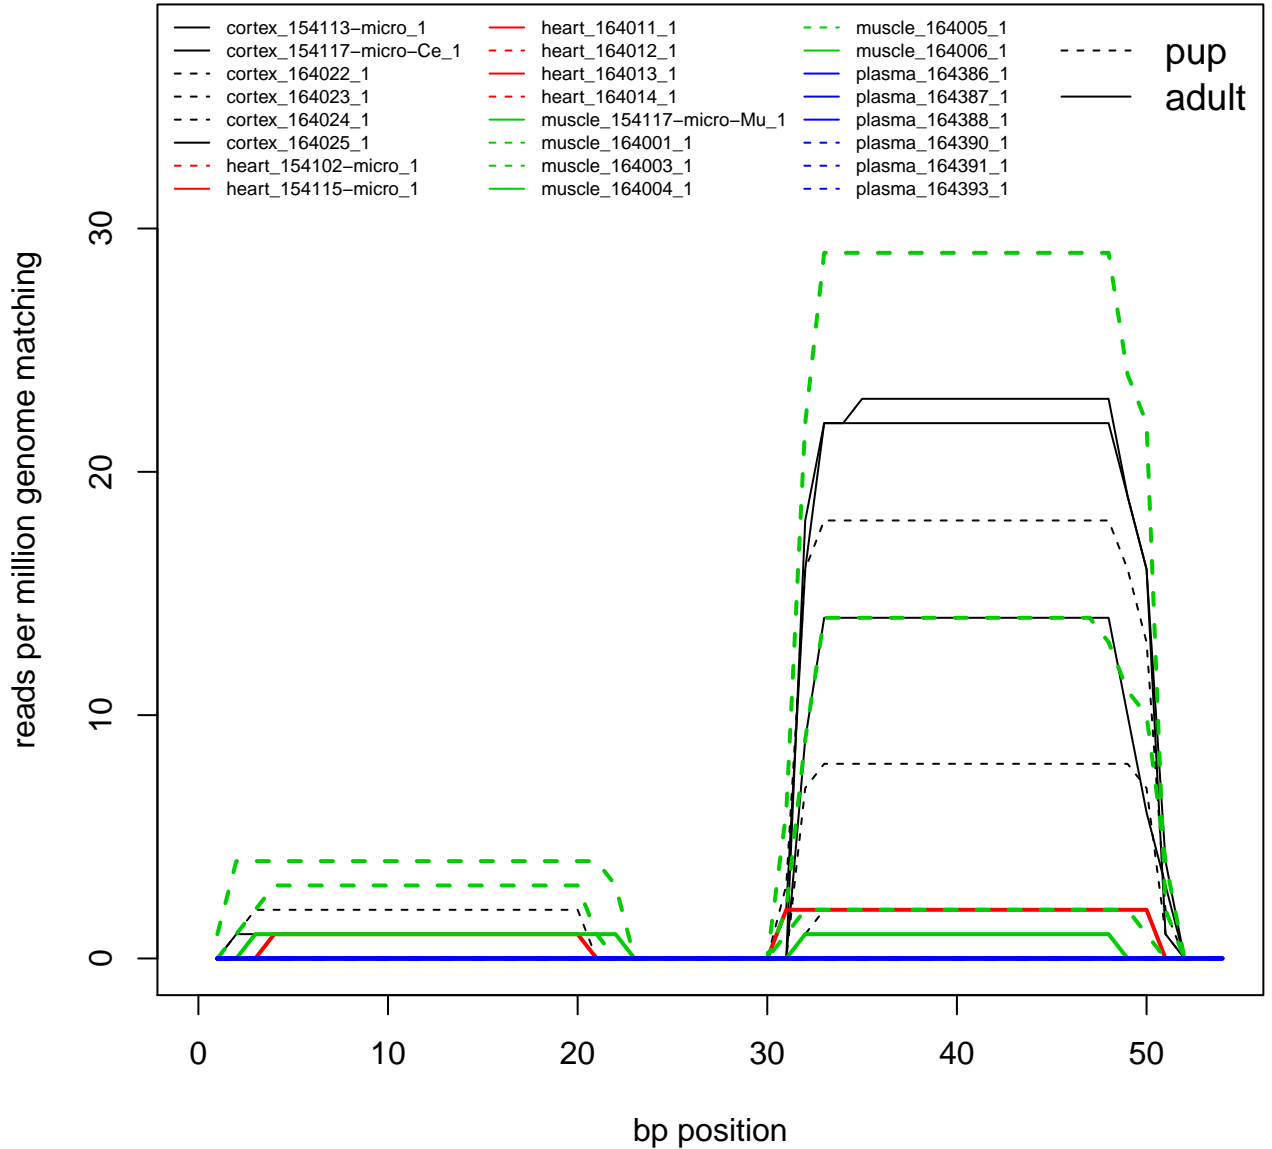



# lwe-miR-668\_loc1

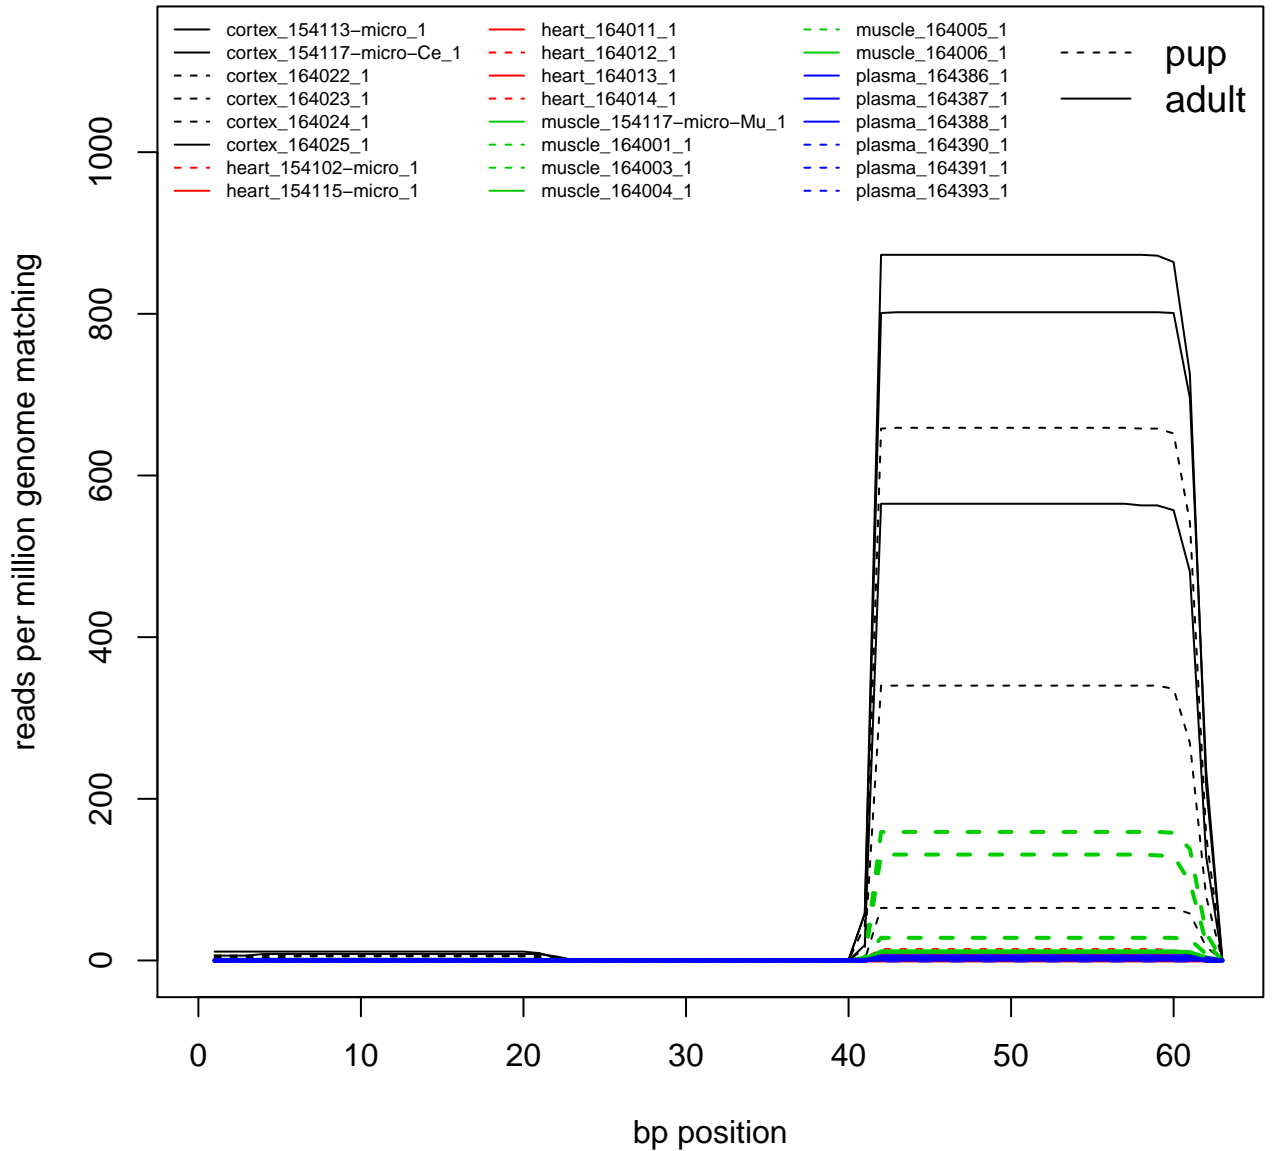

# lwe-miR-654\_loc1

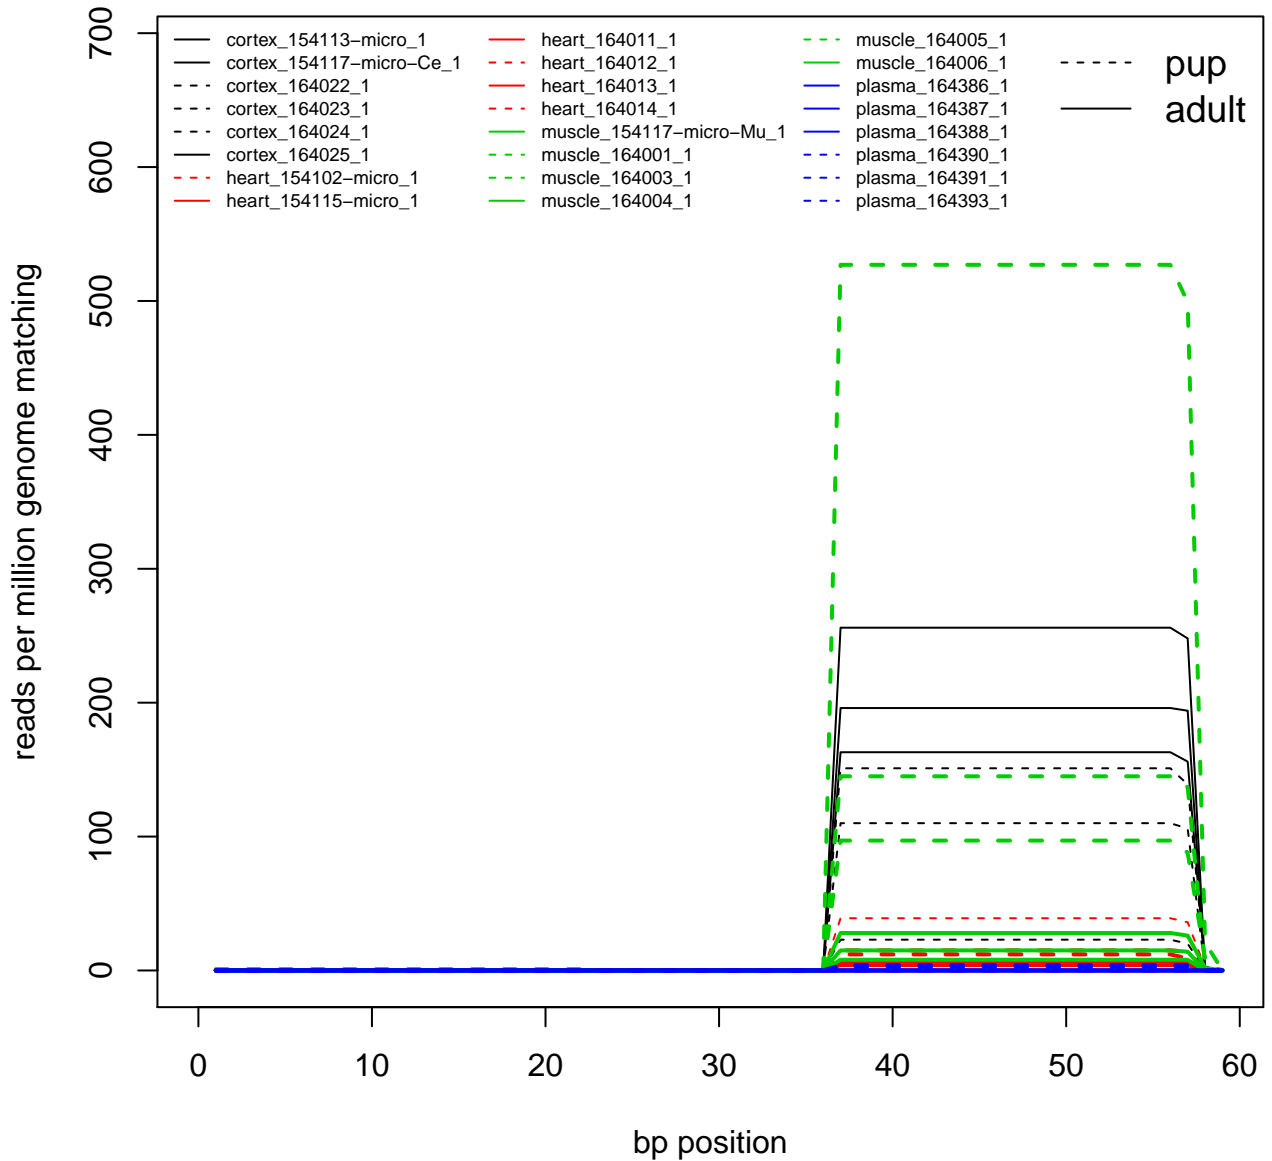

# lwe-miR-543\_miRDeep2\_loc1

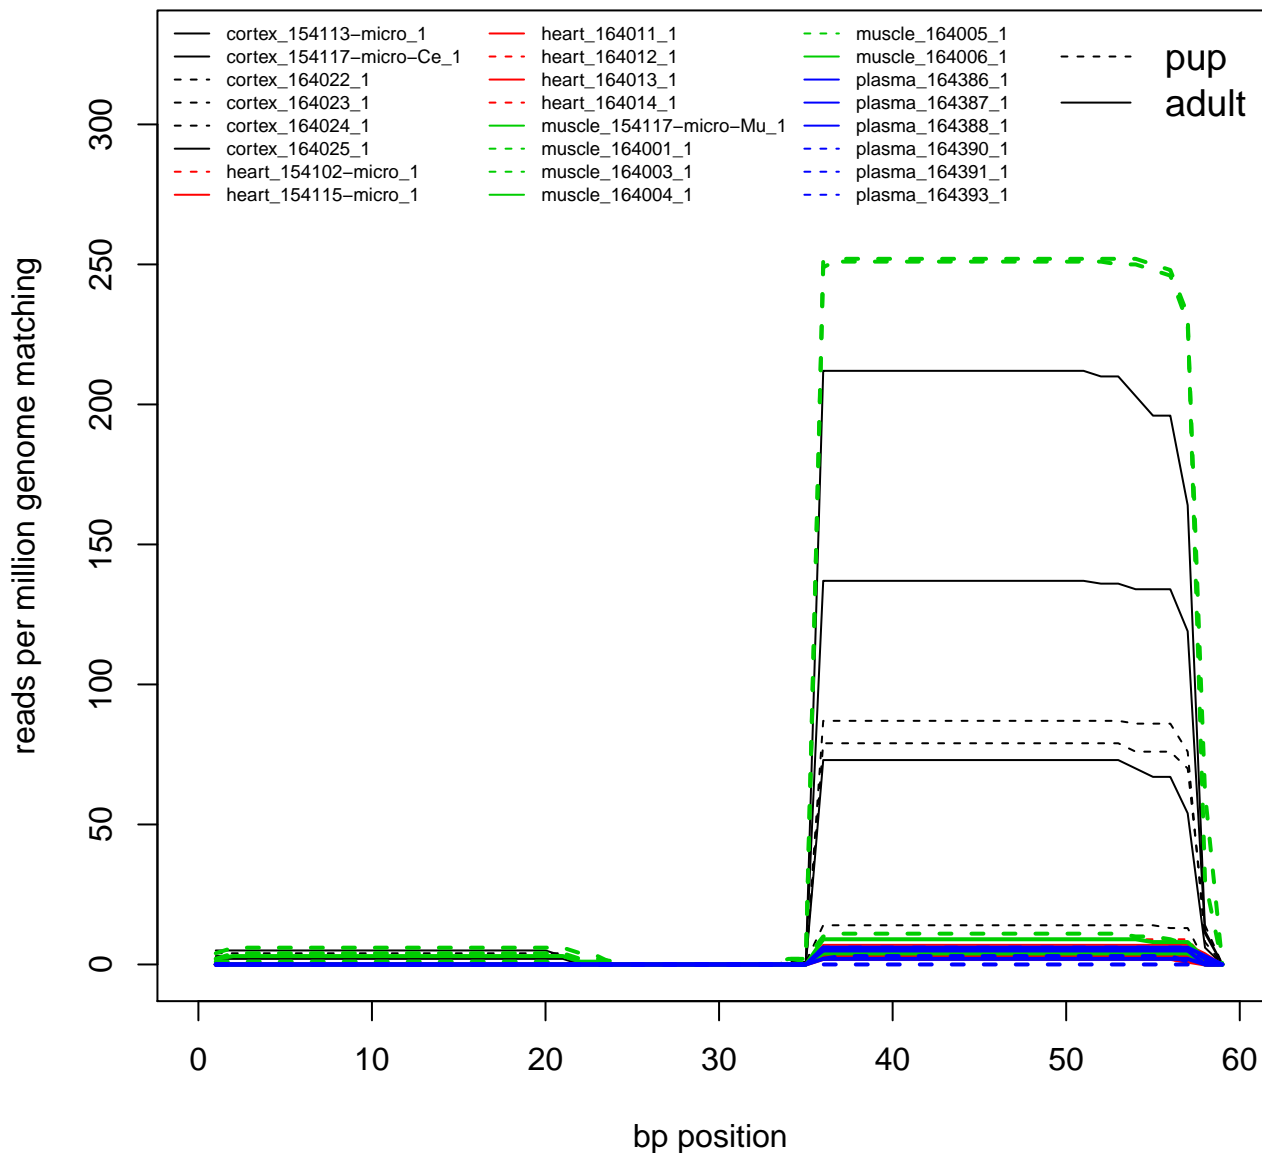



# WS\_miRDeep2\_novel\_106

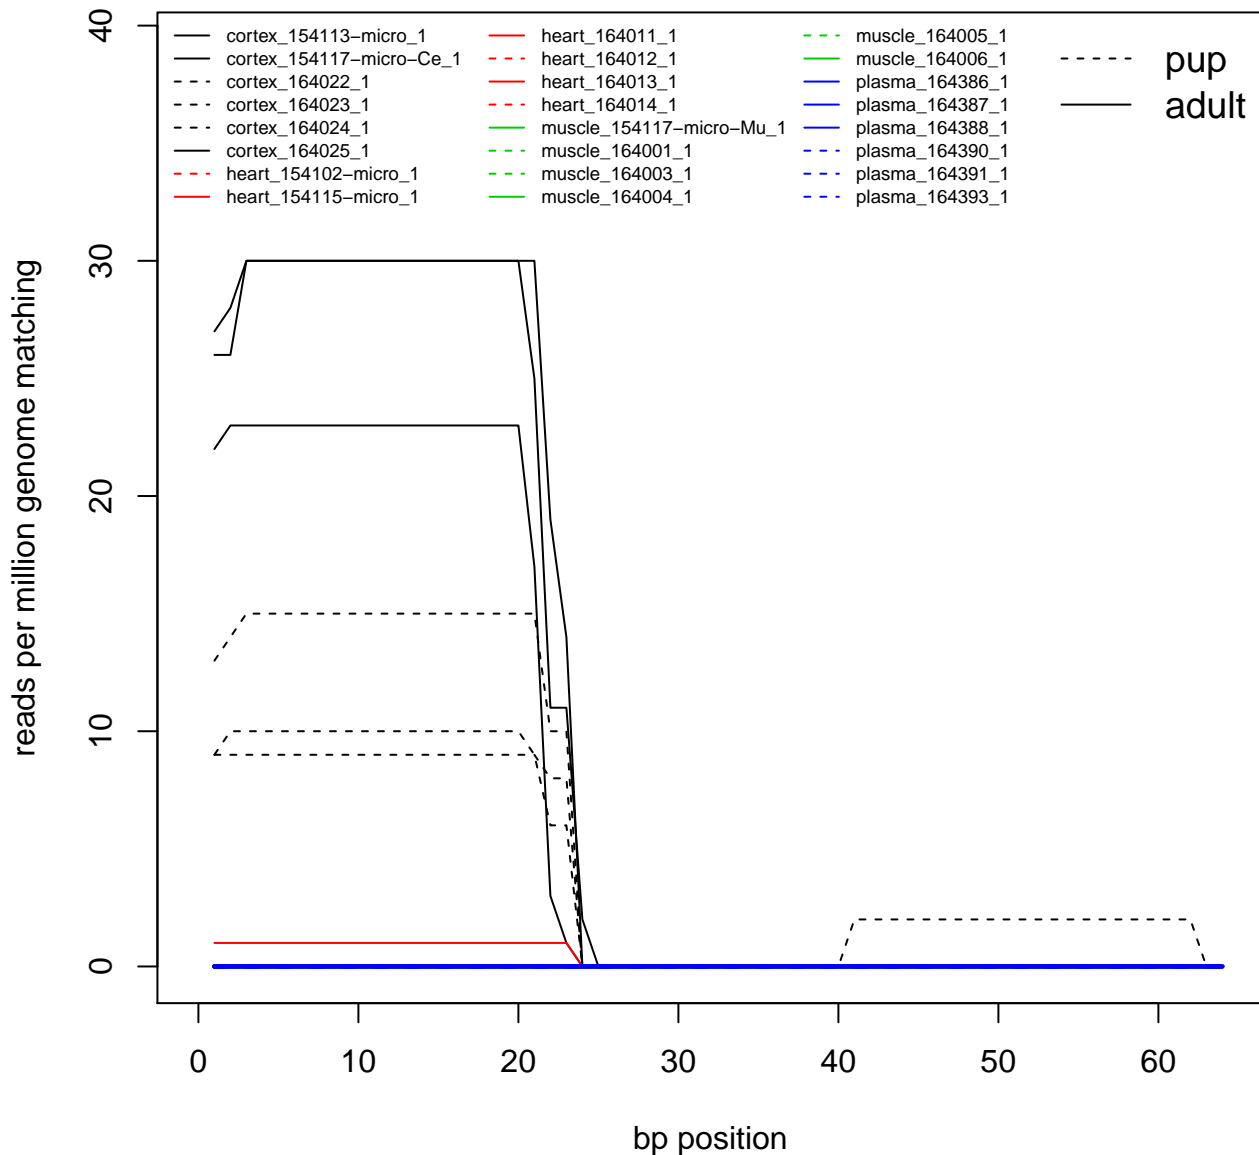

# WS\_miRDeep2\_novel\_107

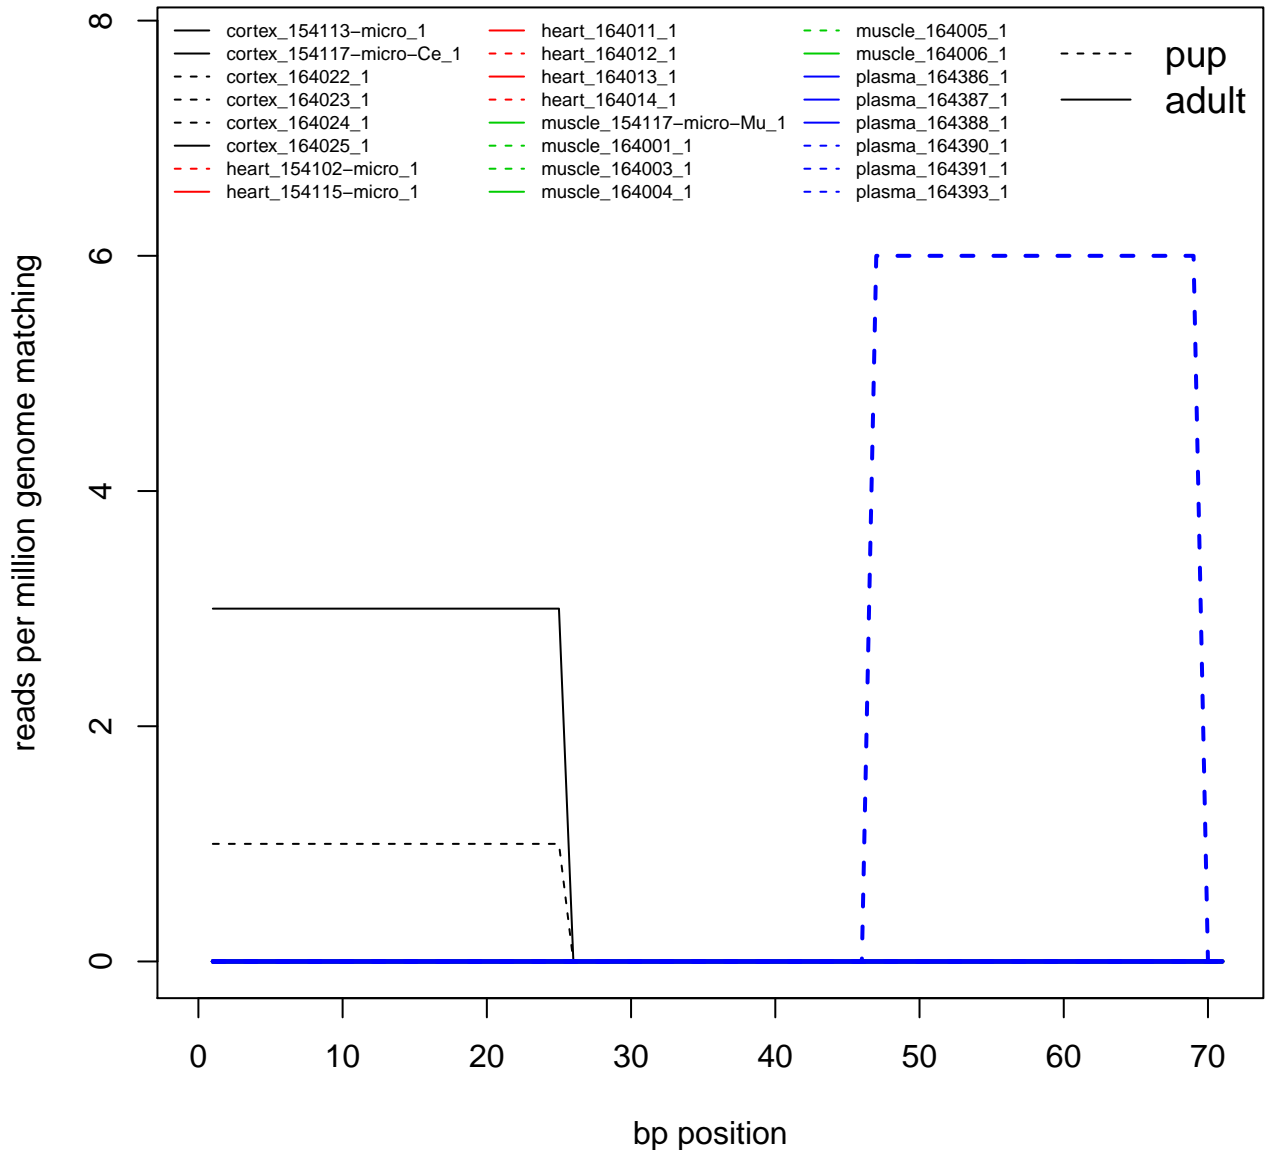

# WS\_miRDeep2\_novel\_108

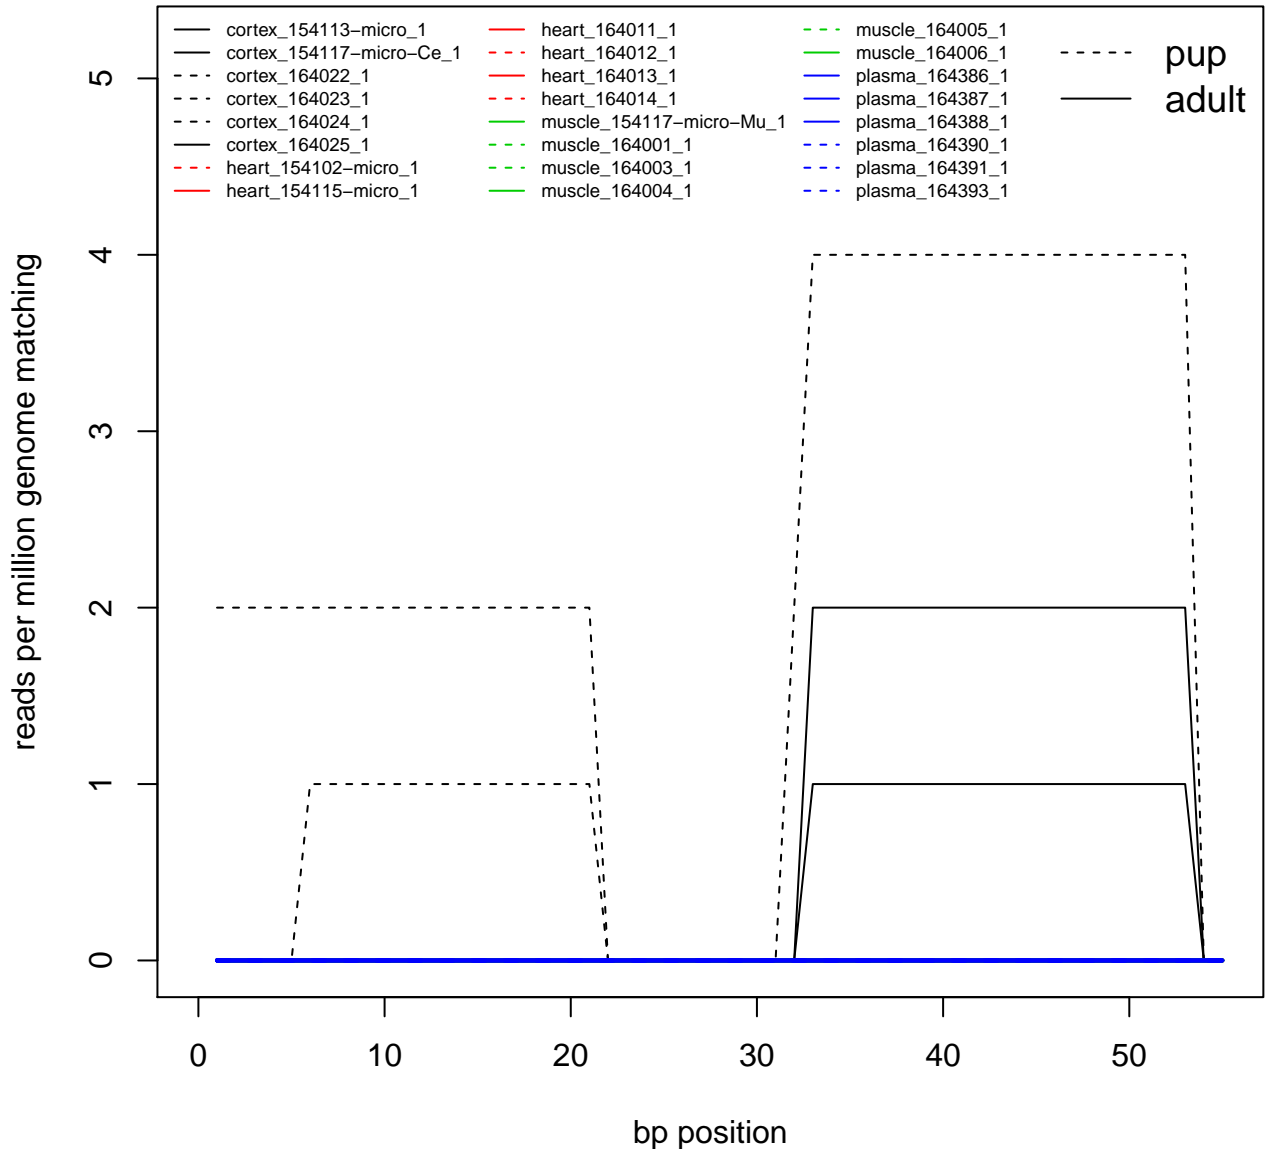

# WS\_miRDeep2\_novel\_109

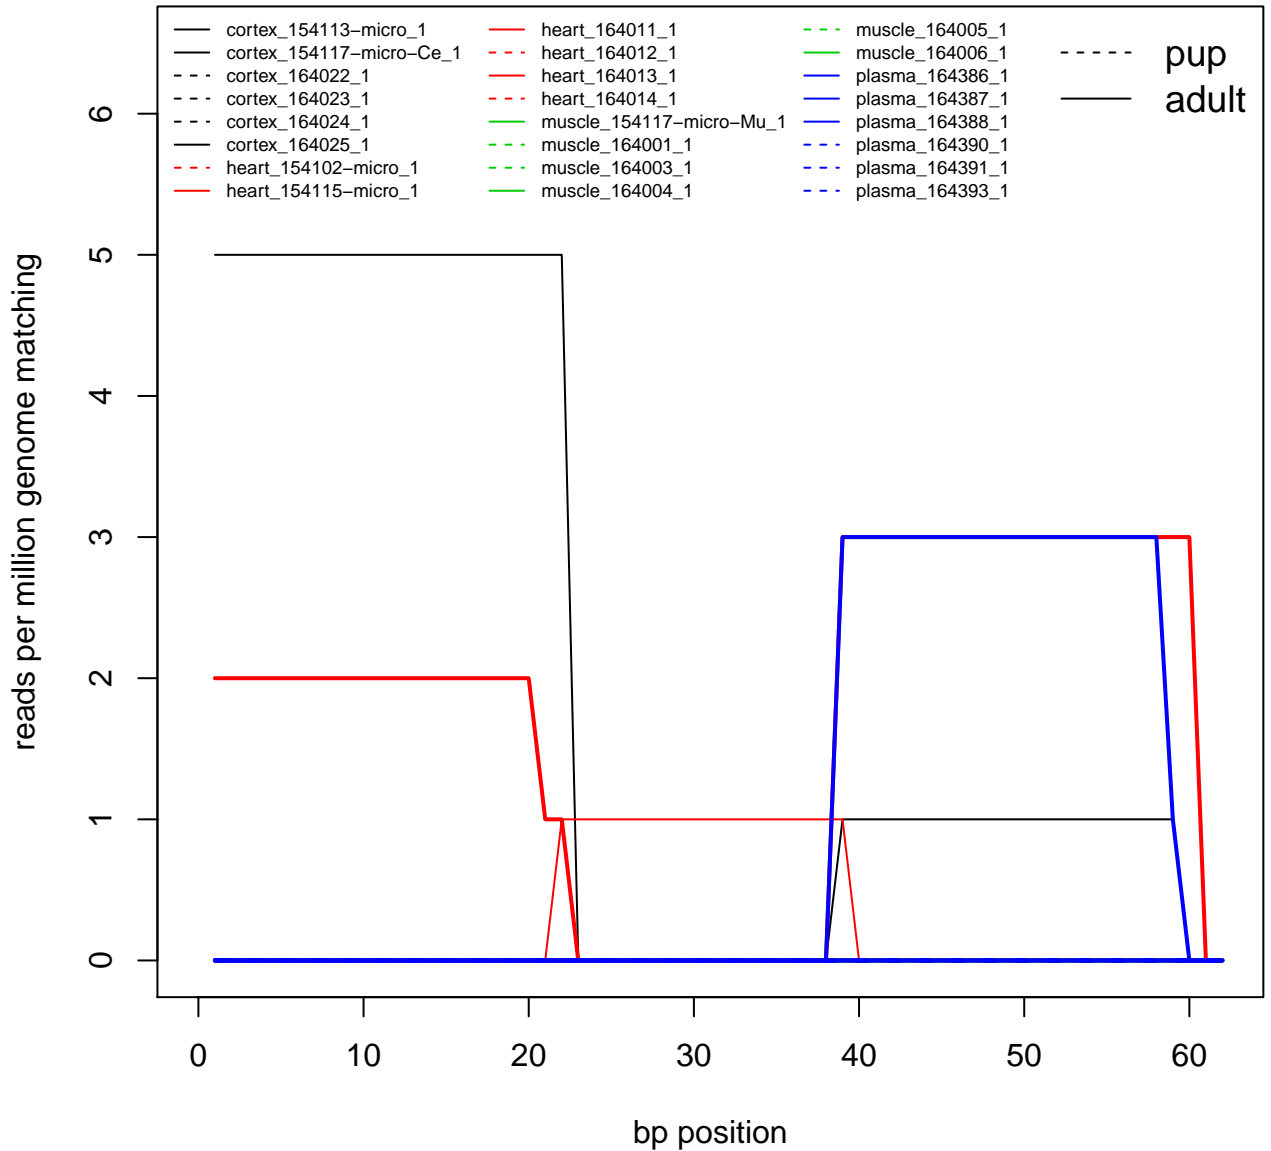



# lwe-miR-3085\_loc1

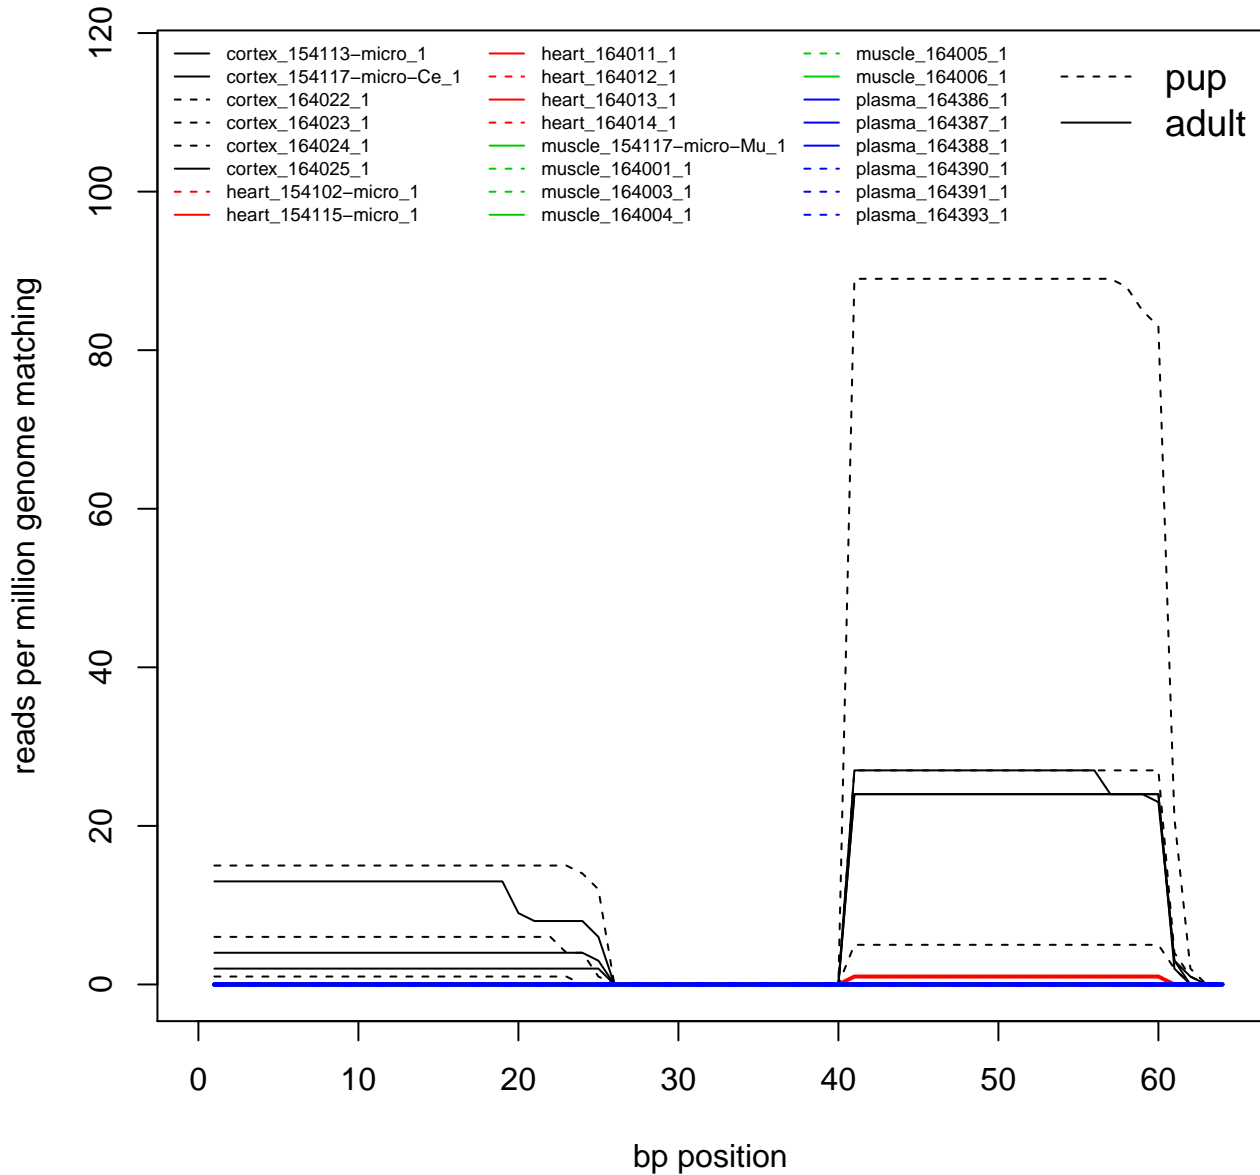

# WS\_miRDeep2\_novel\_111

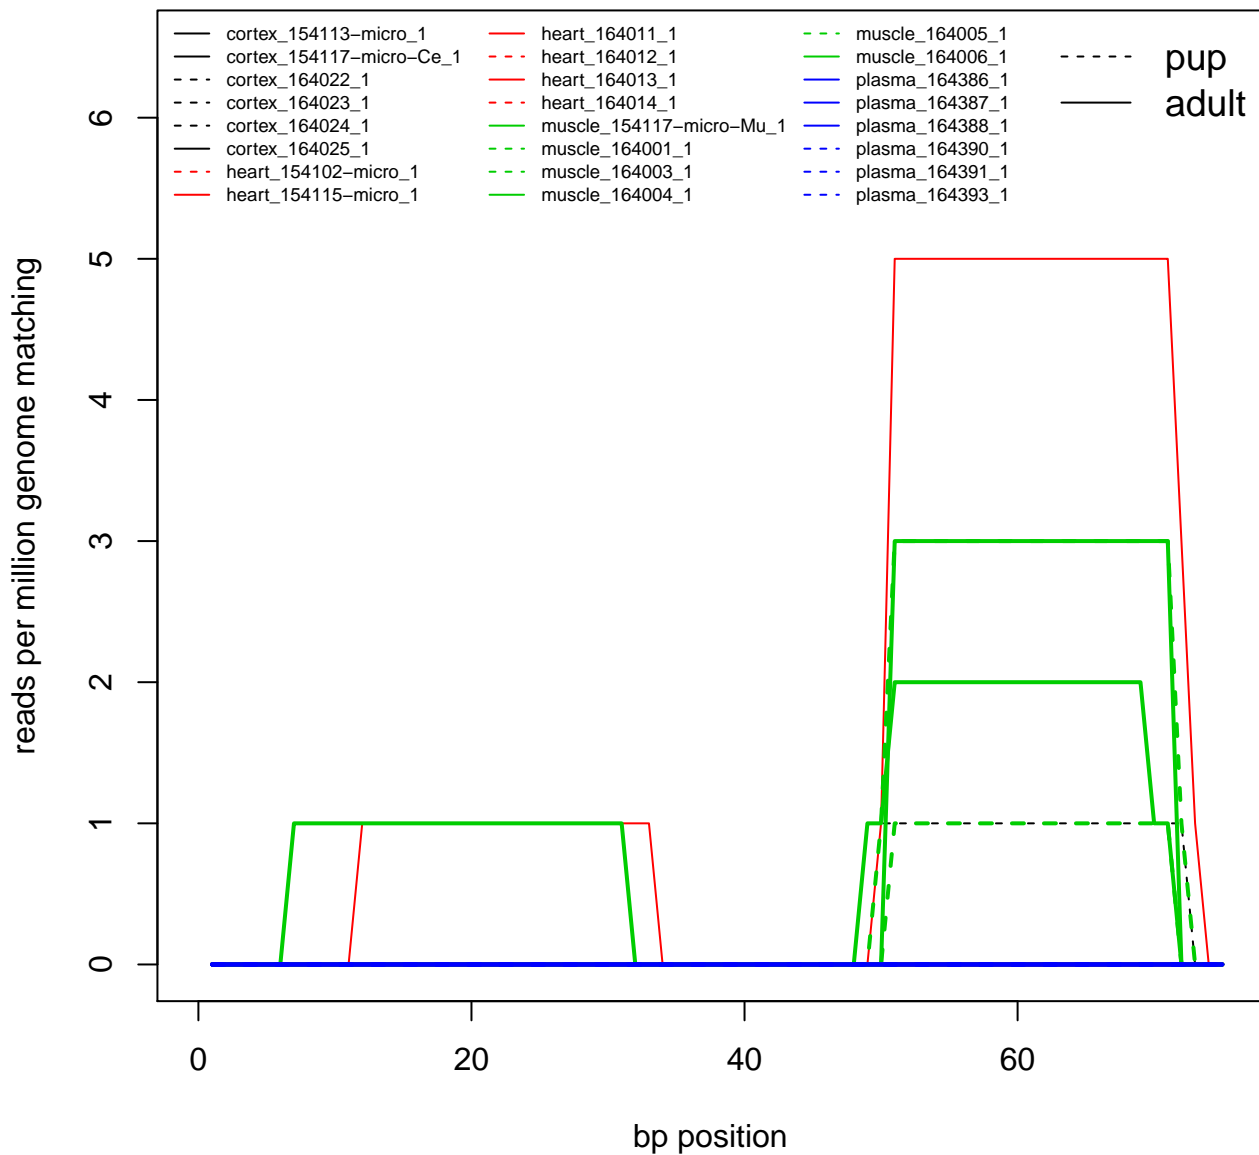

# lwe-miR-301b\_miRDeep2\_loc1

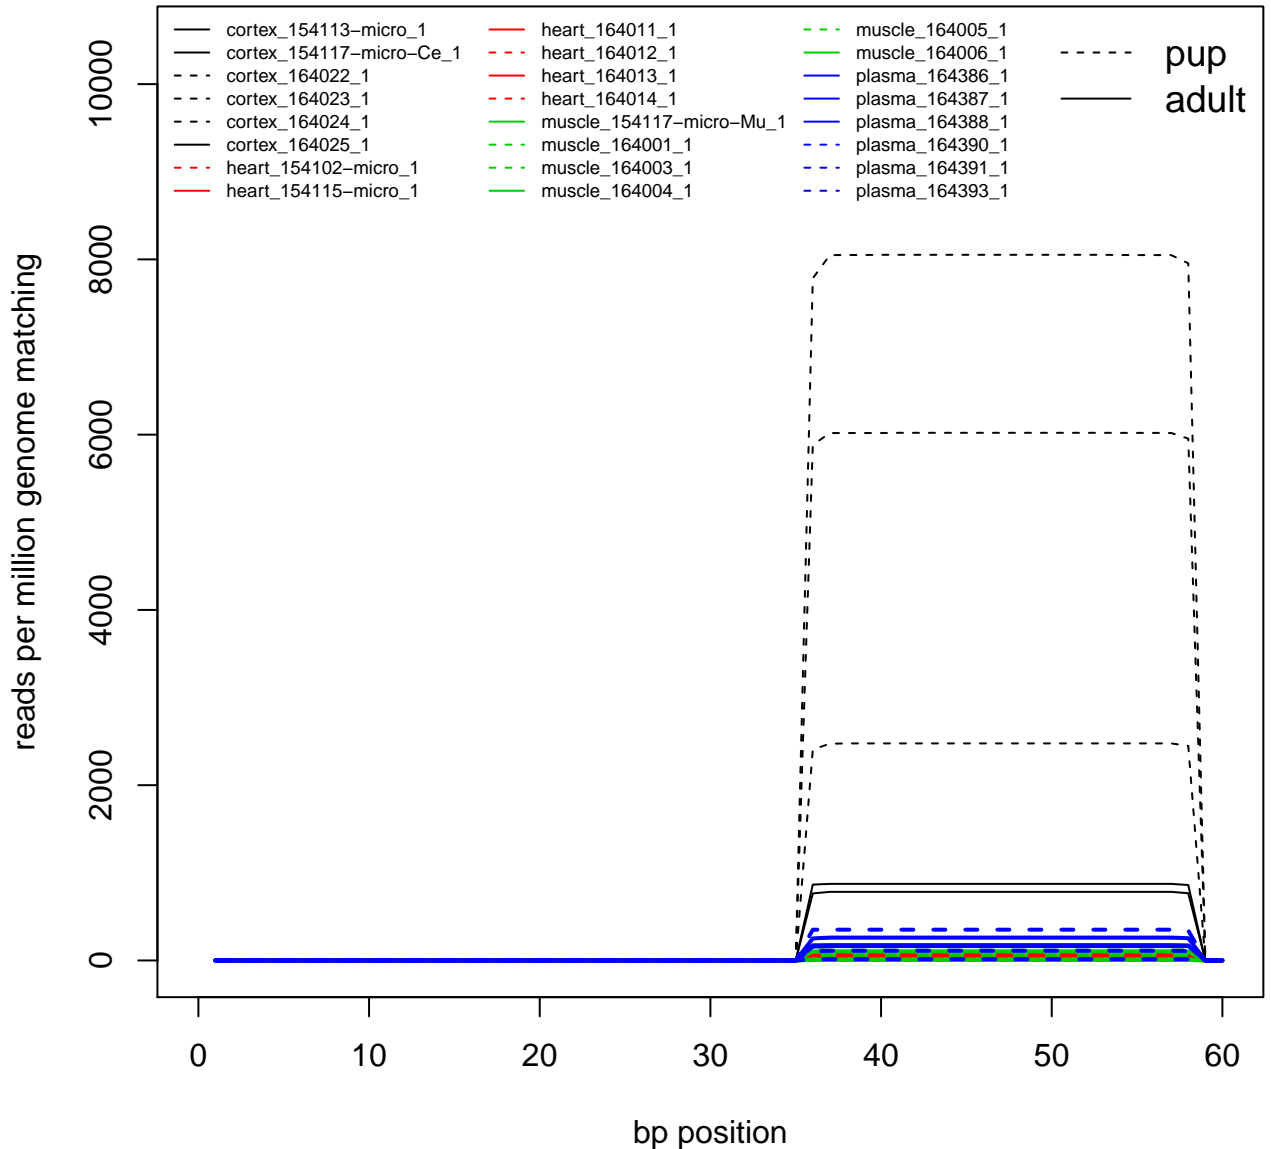

# WS\_miRDeep2\_novel\_112

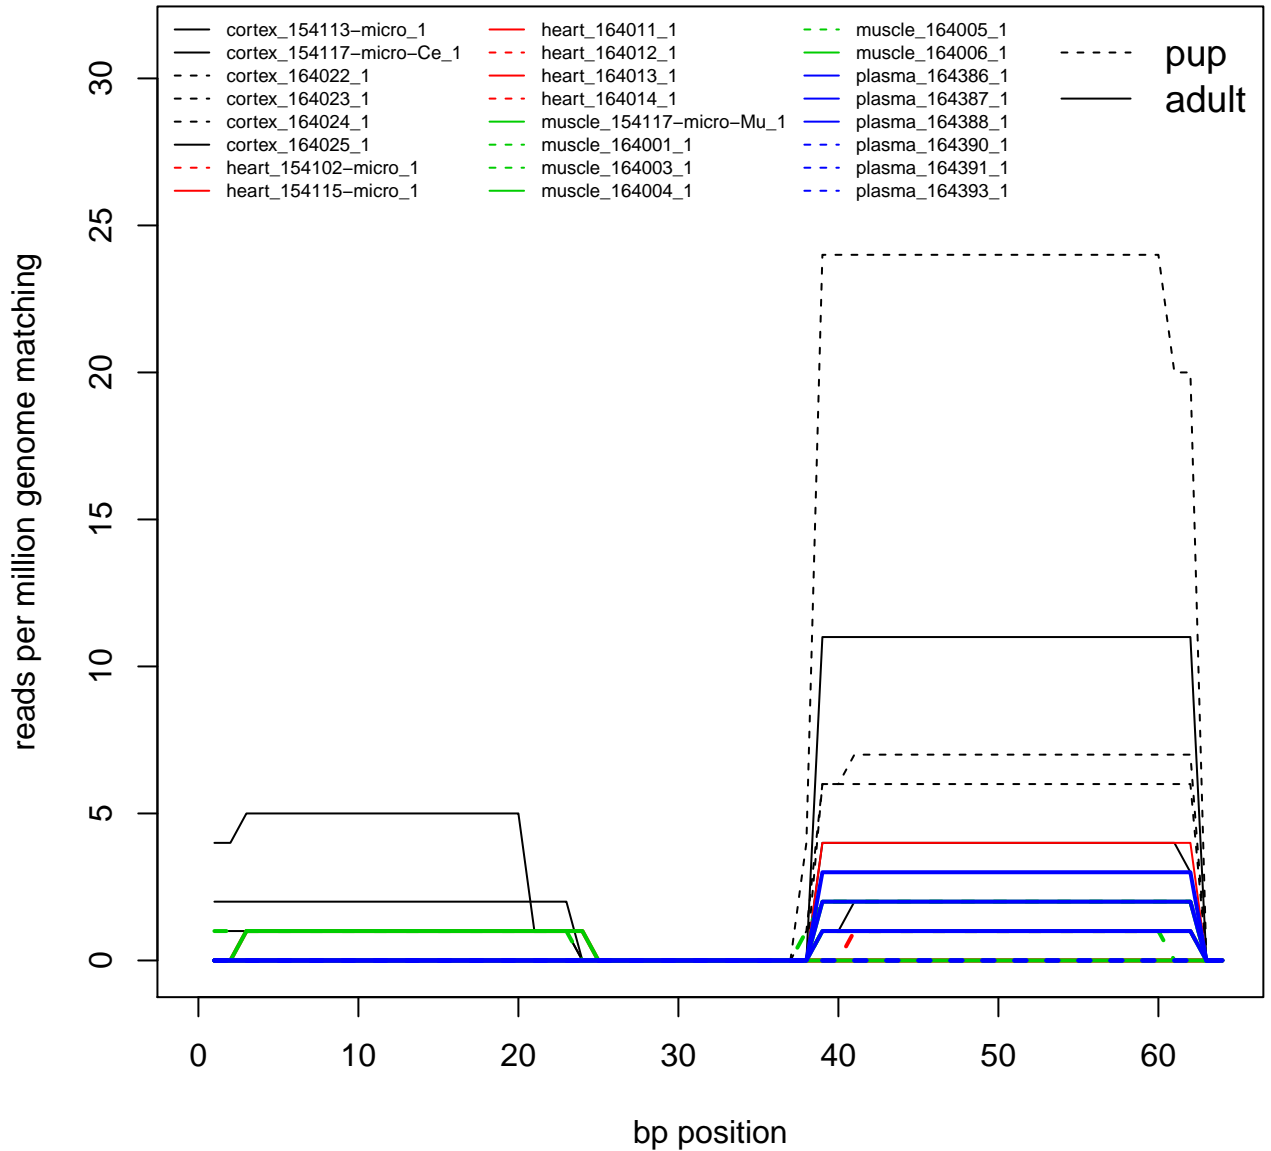

# WS\_miRDeep2\_novel\_113

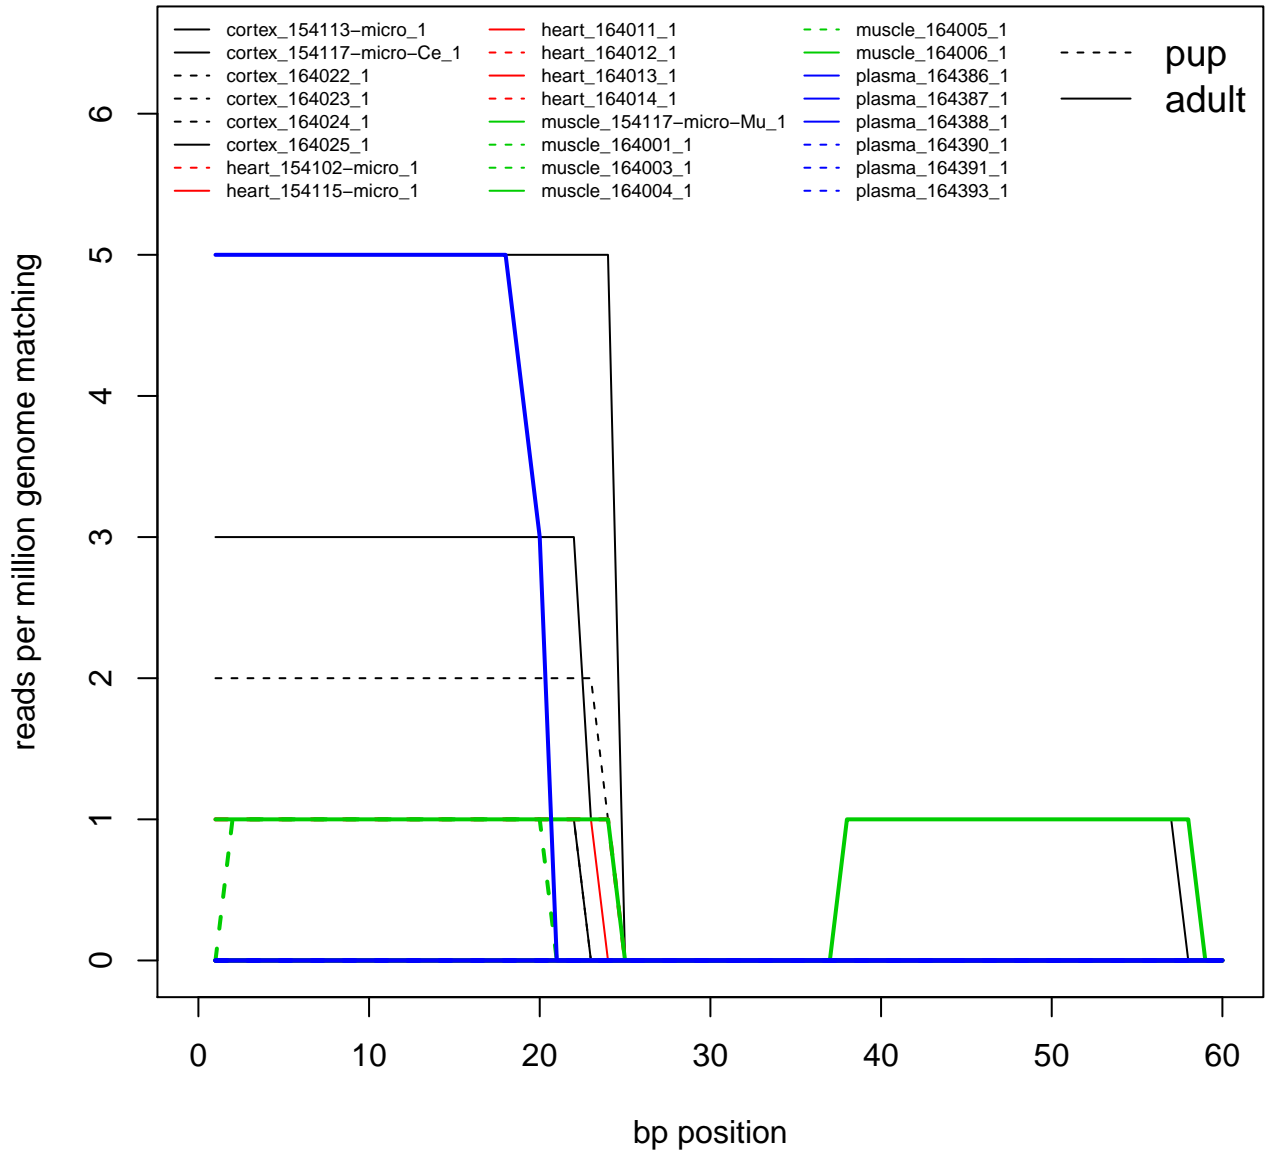

# WS\_miRDeep2\_novel\_114

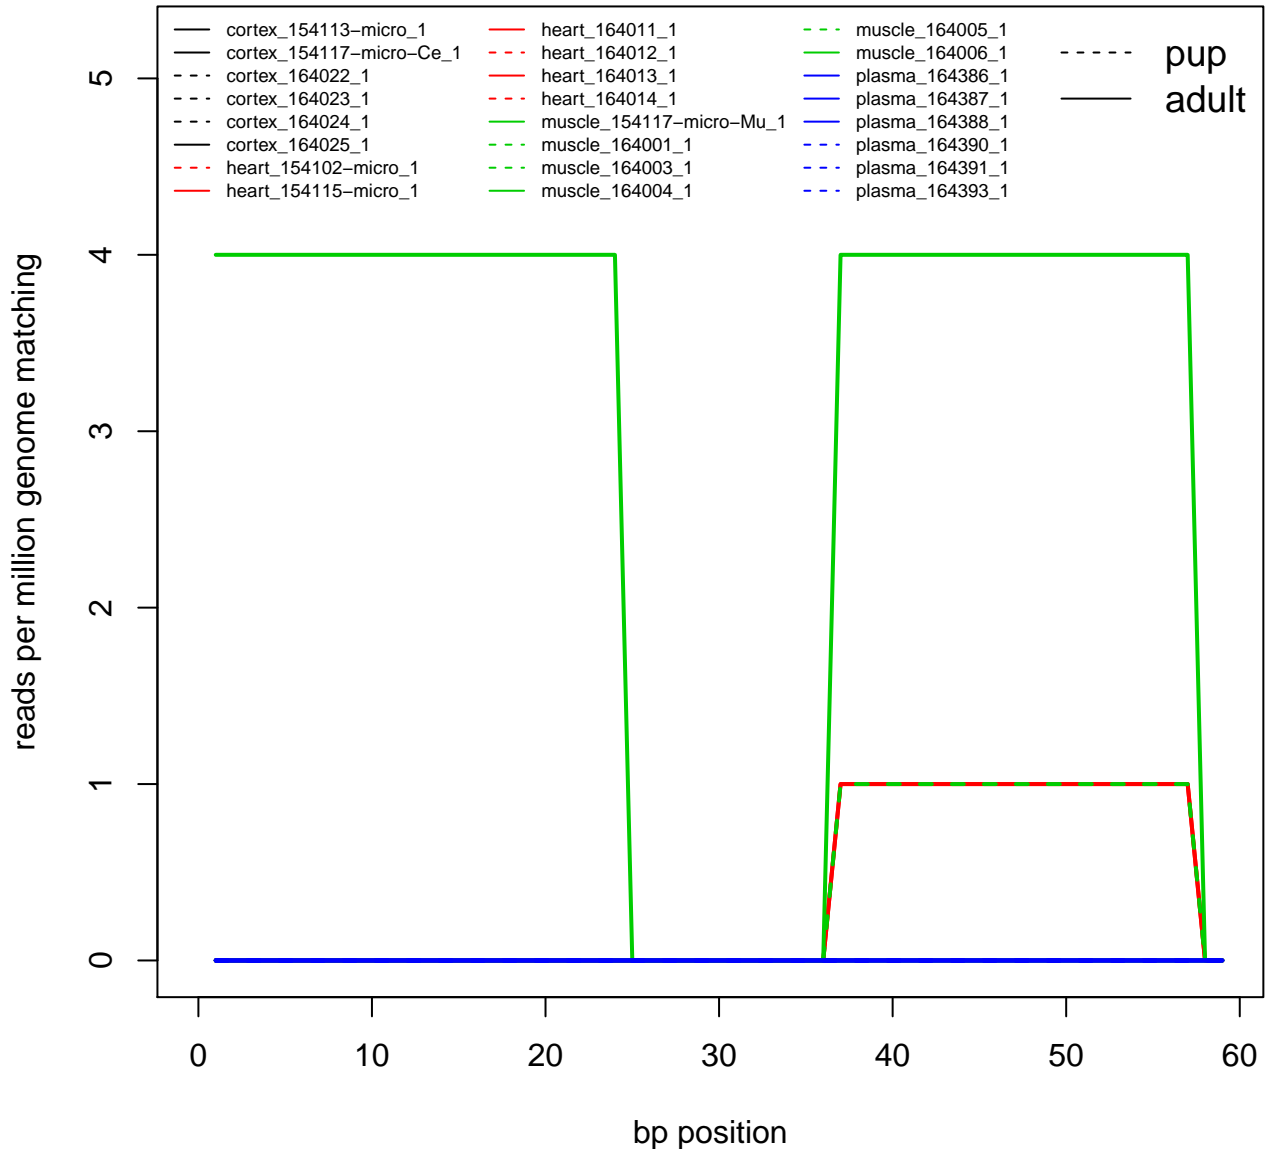

# WS\_miRDeep2\_novel\_115

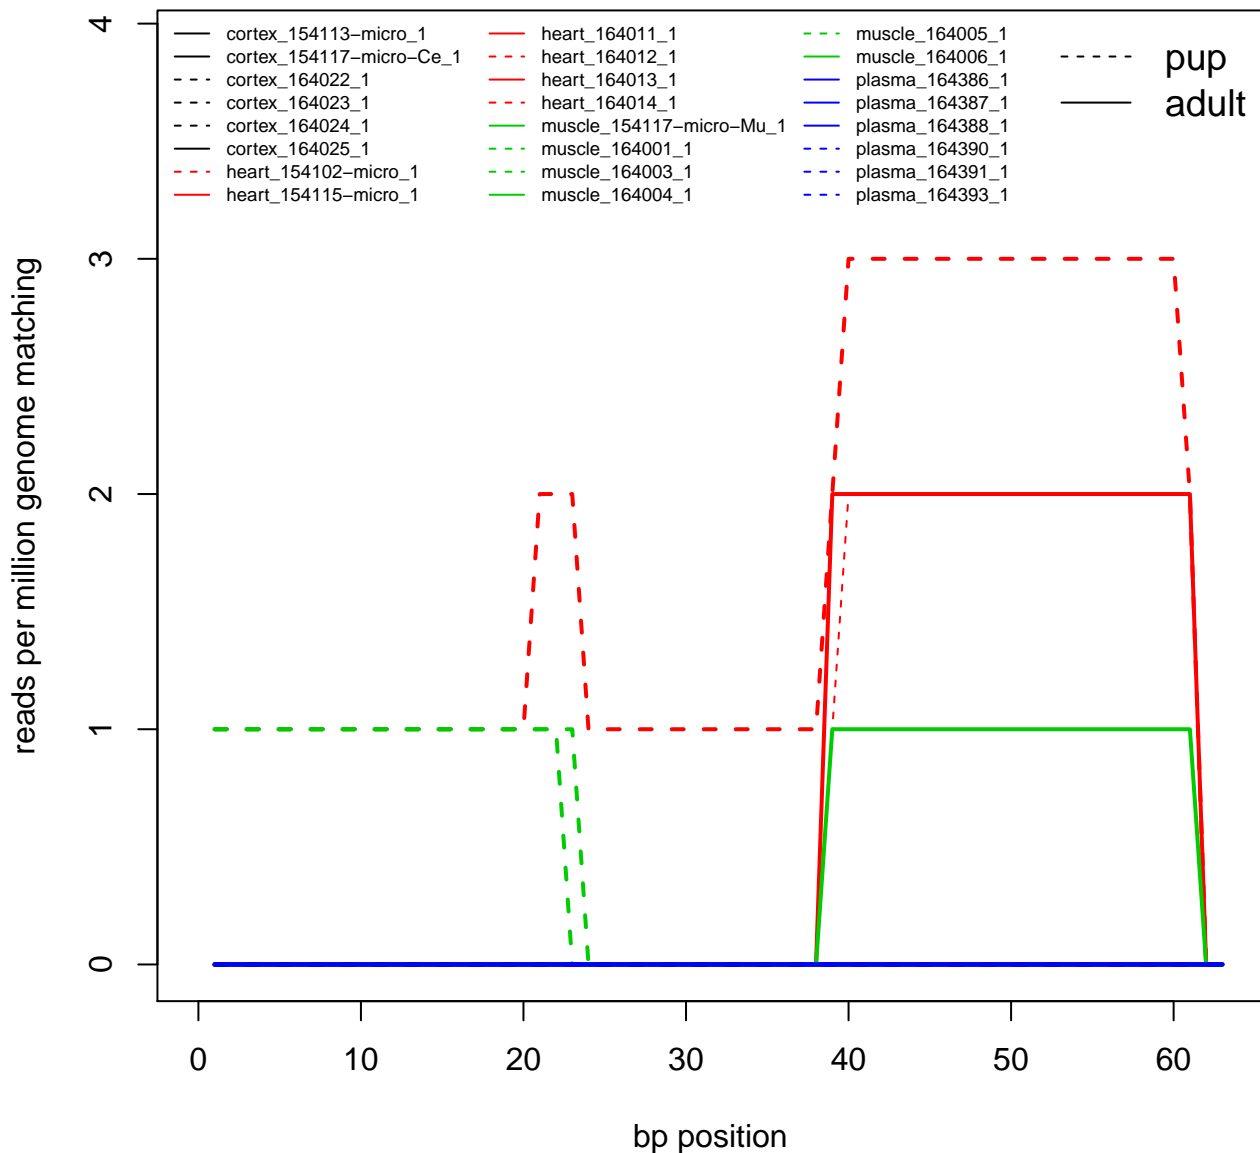

Supplementary Figure S6. Comparison of miRNA-5p and miRNA-3p abundance (reads per million genome matching) for all 559 annotated miRNA loci. Colors separate tissues, while different shapes separate pup and adult individuals.



## lwe-miR-92c\_loc1

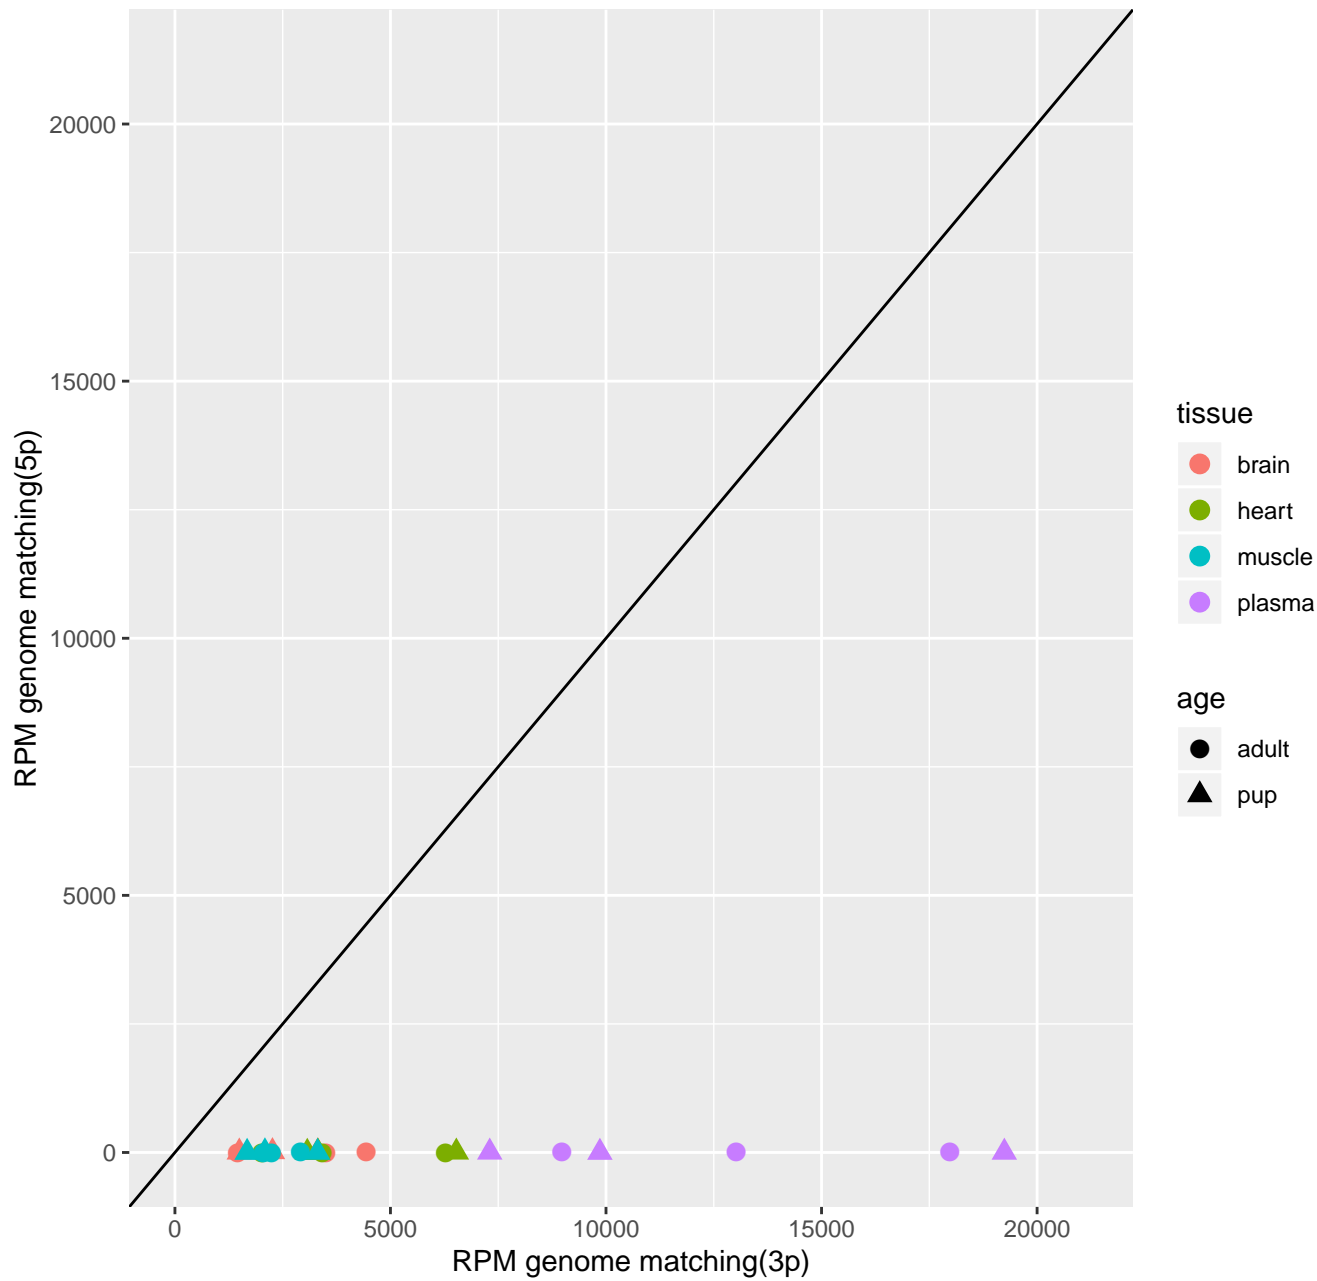

# lwe-miR-19\_loc1

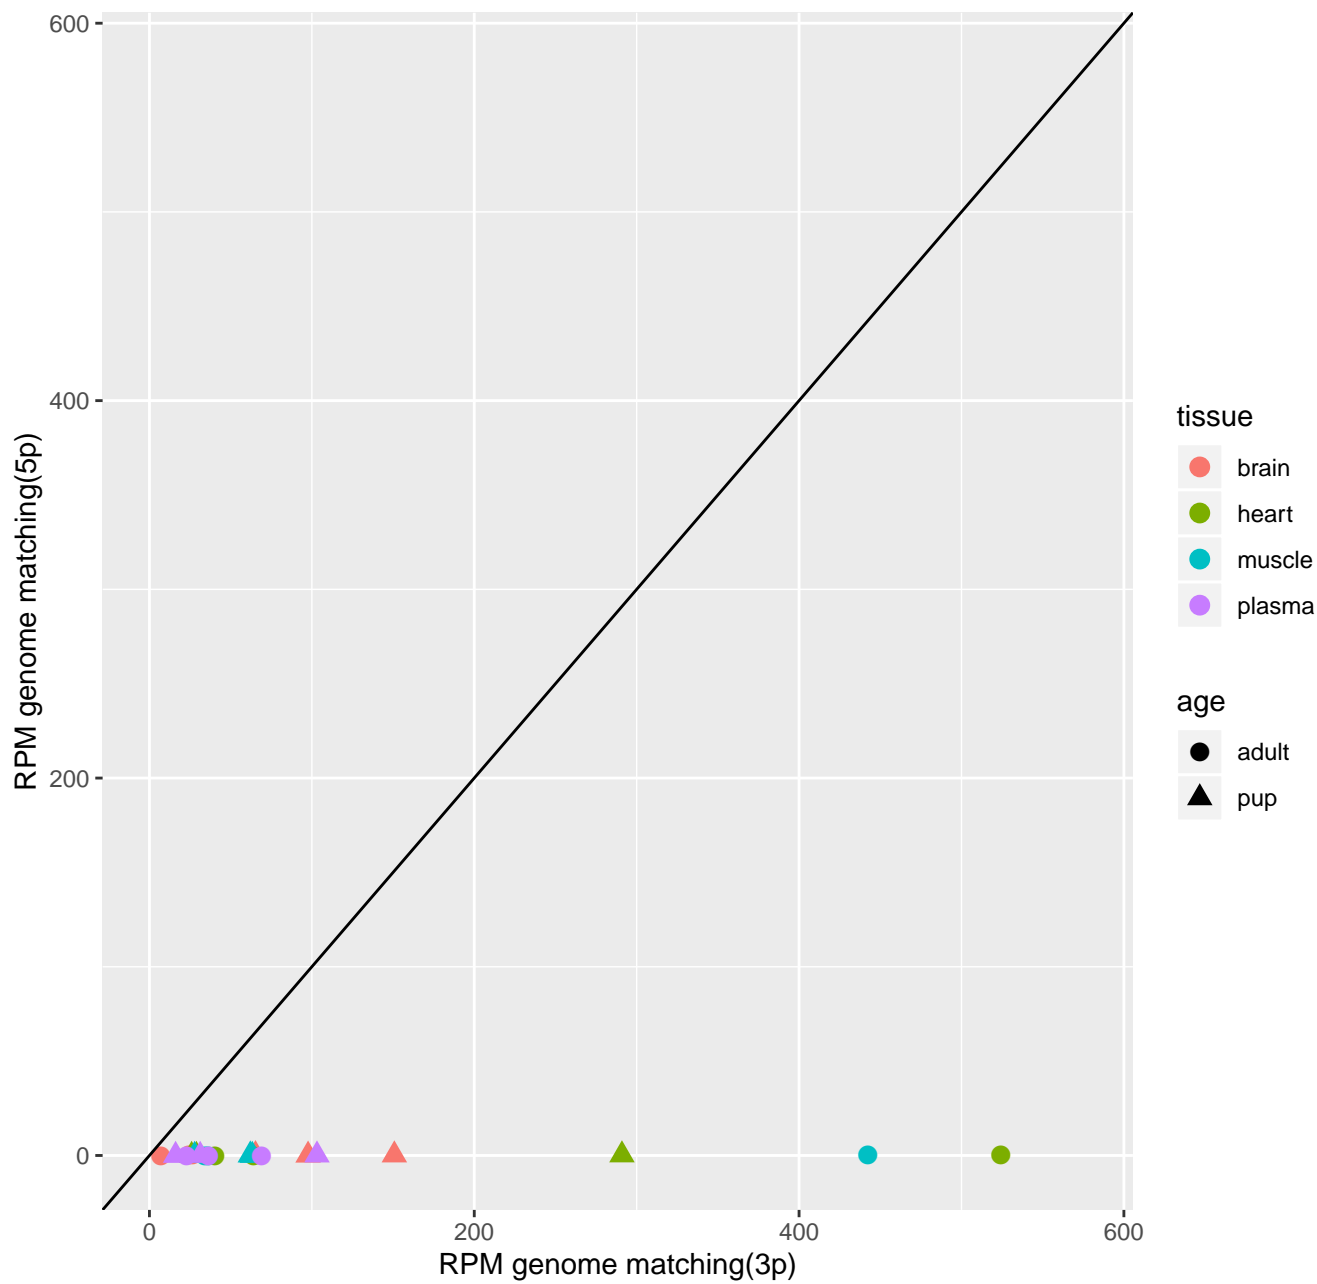

## lwe-miR-20a\_loc1

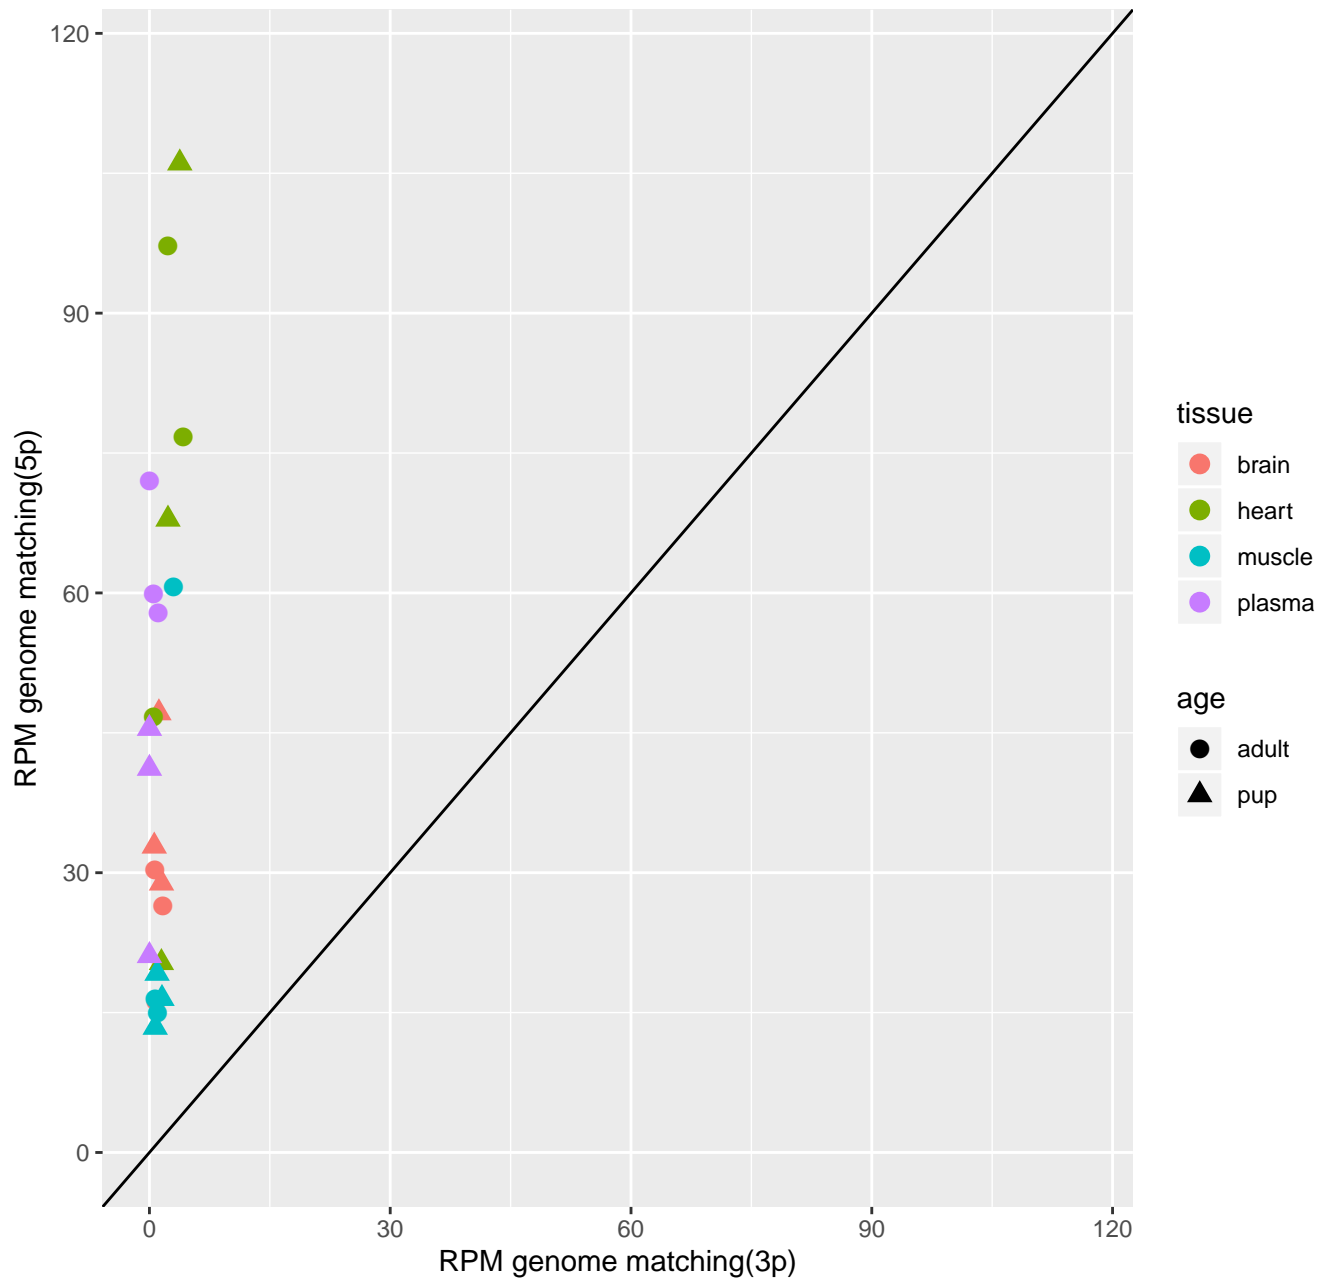

## lwe-miR-19a\_loc1

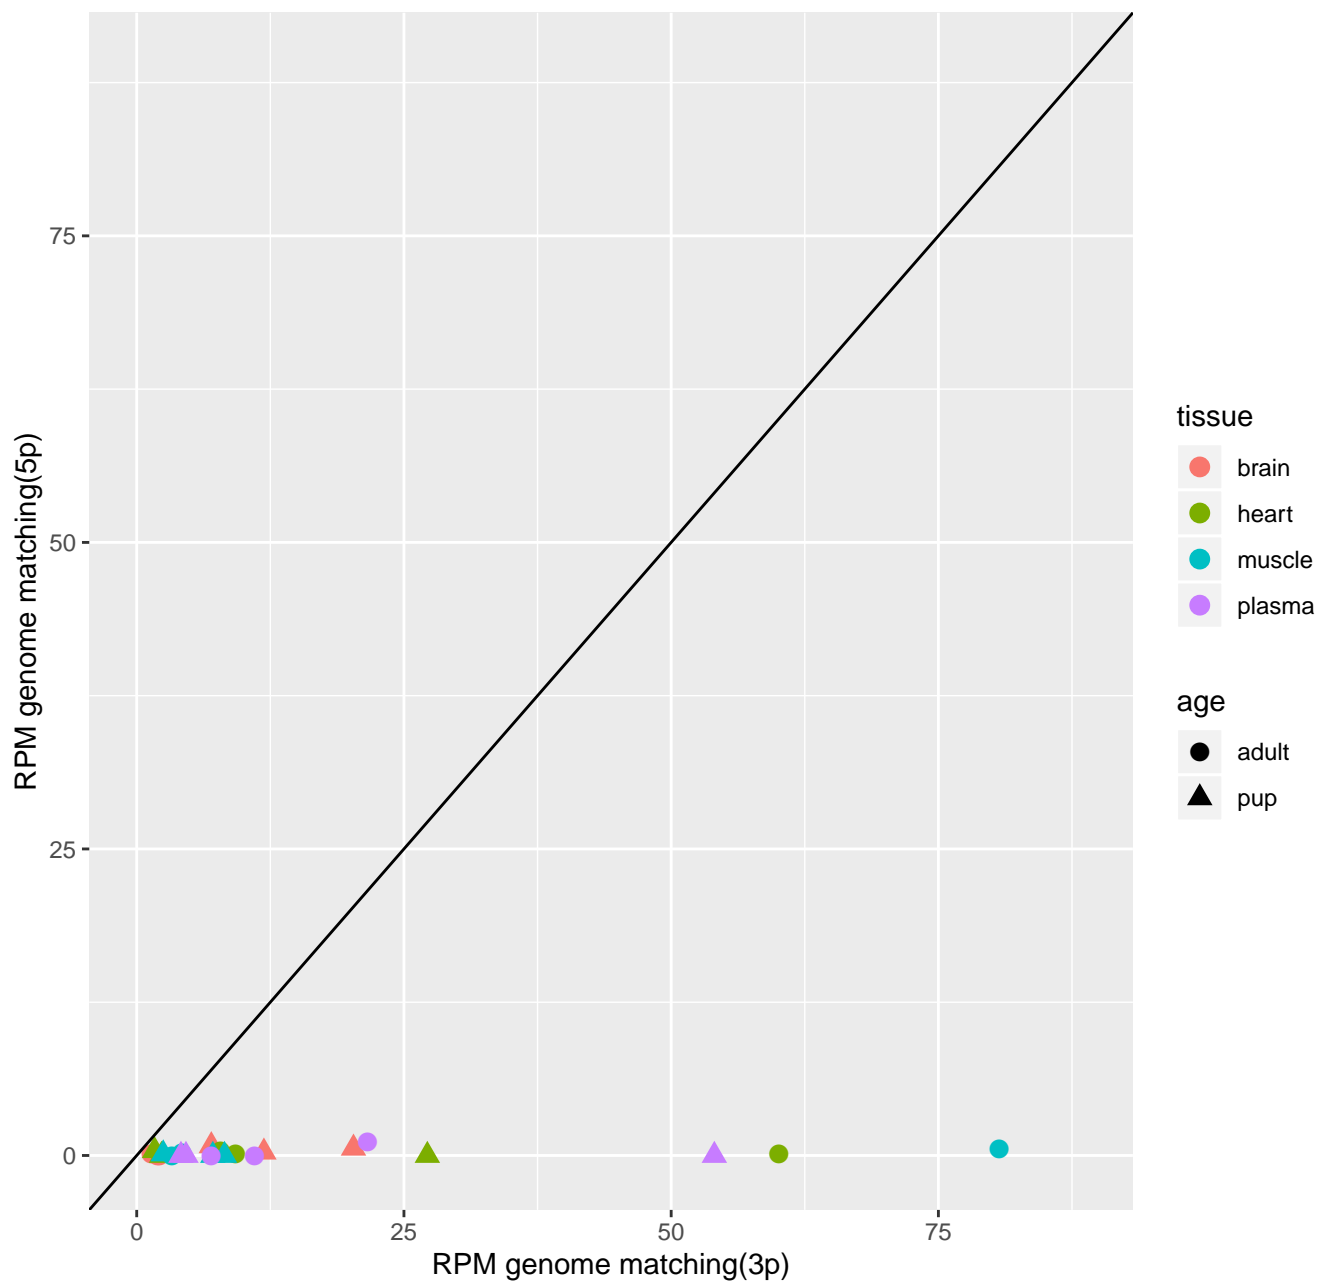

## lwe-miR-17\_loc1

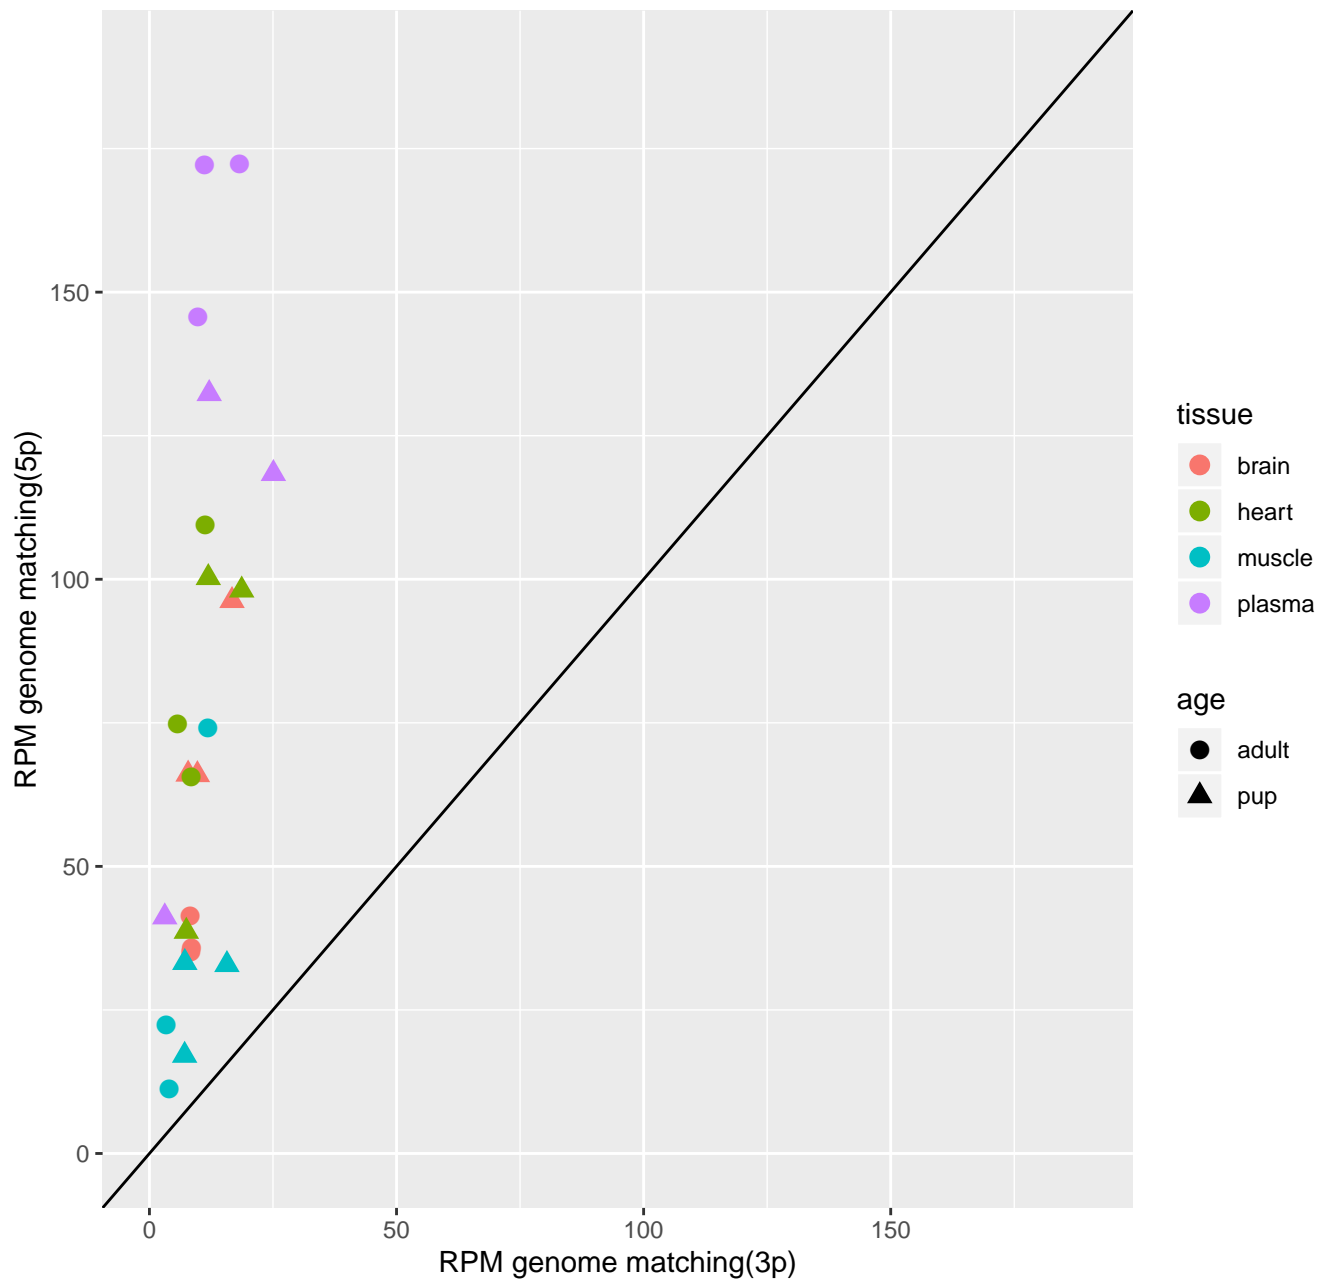

# lwe-miR-384\_loc1

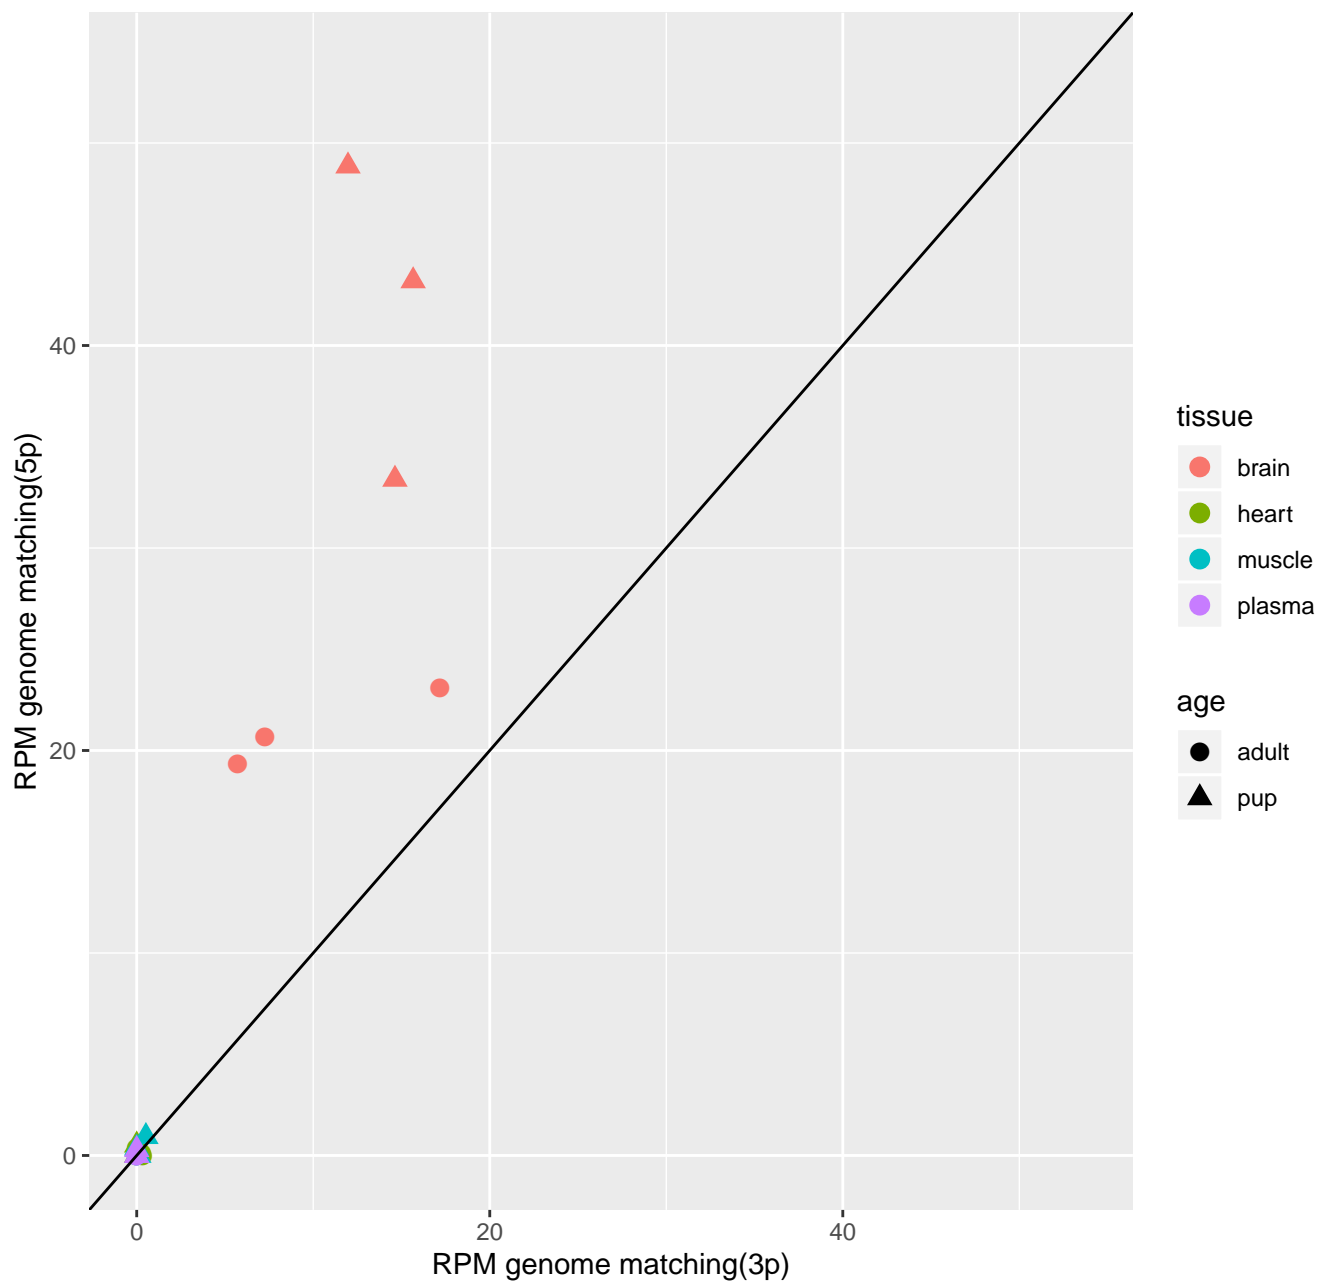

# lwe-miR-325\_loc1

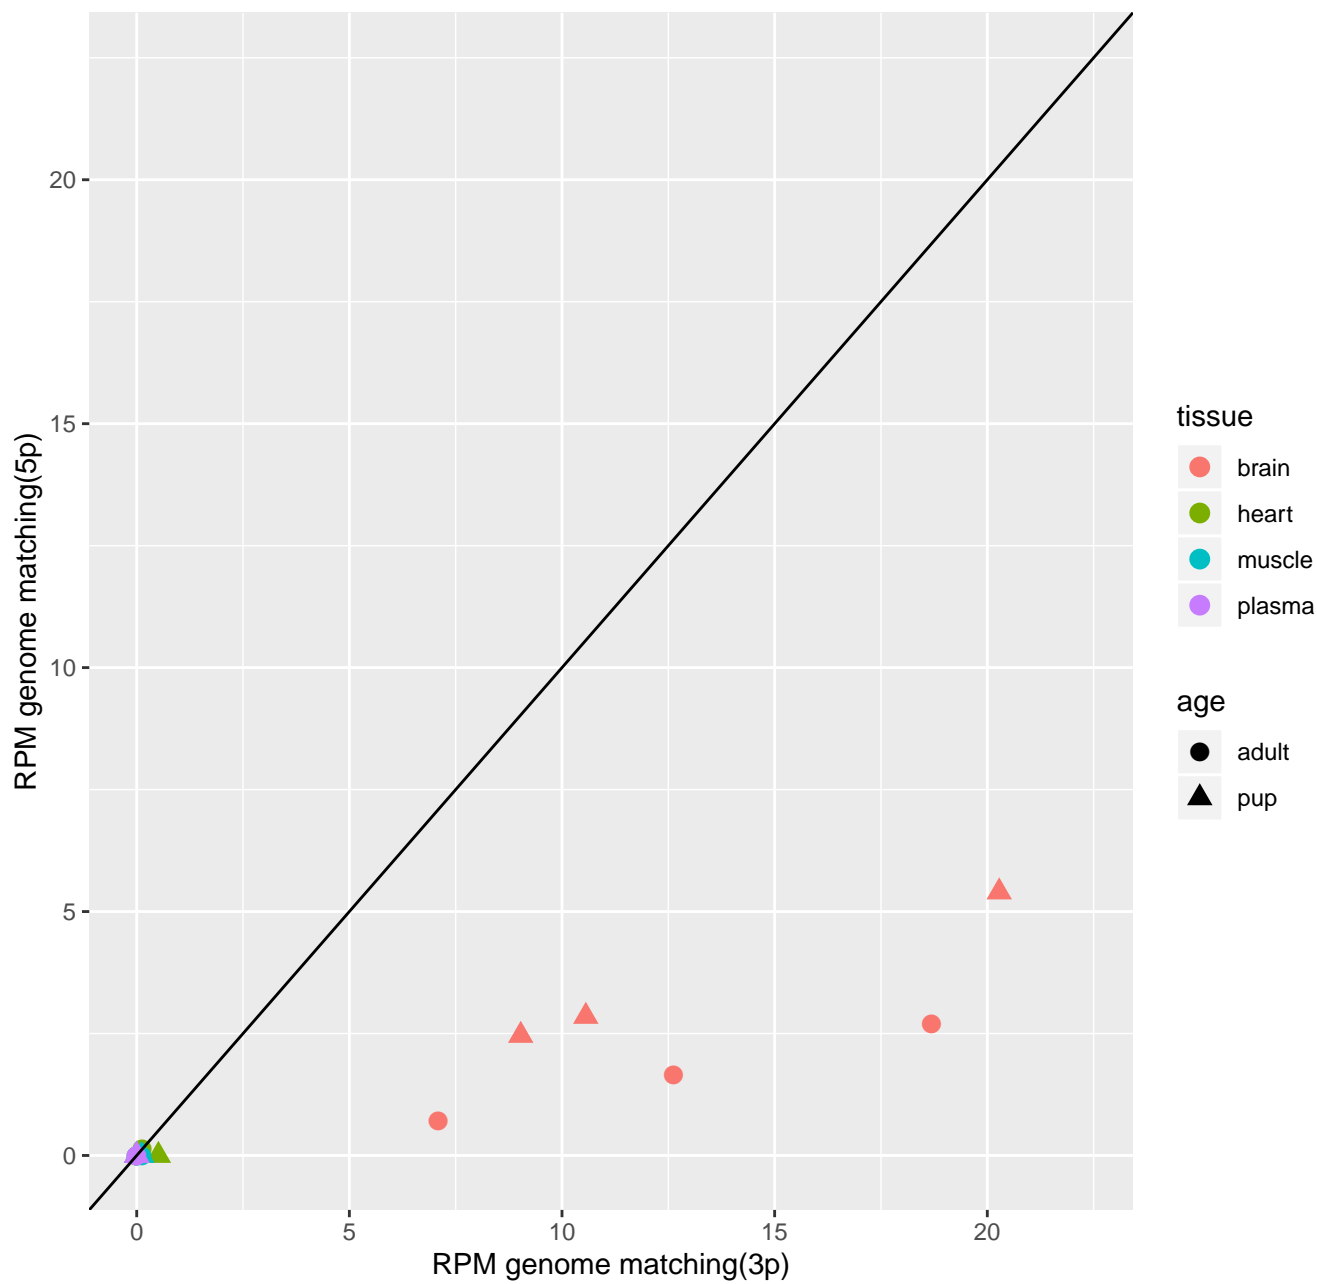

## lwe-miR-3059\_loc1

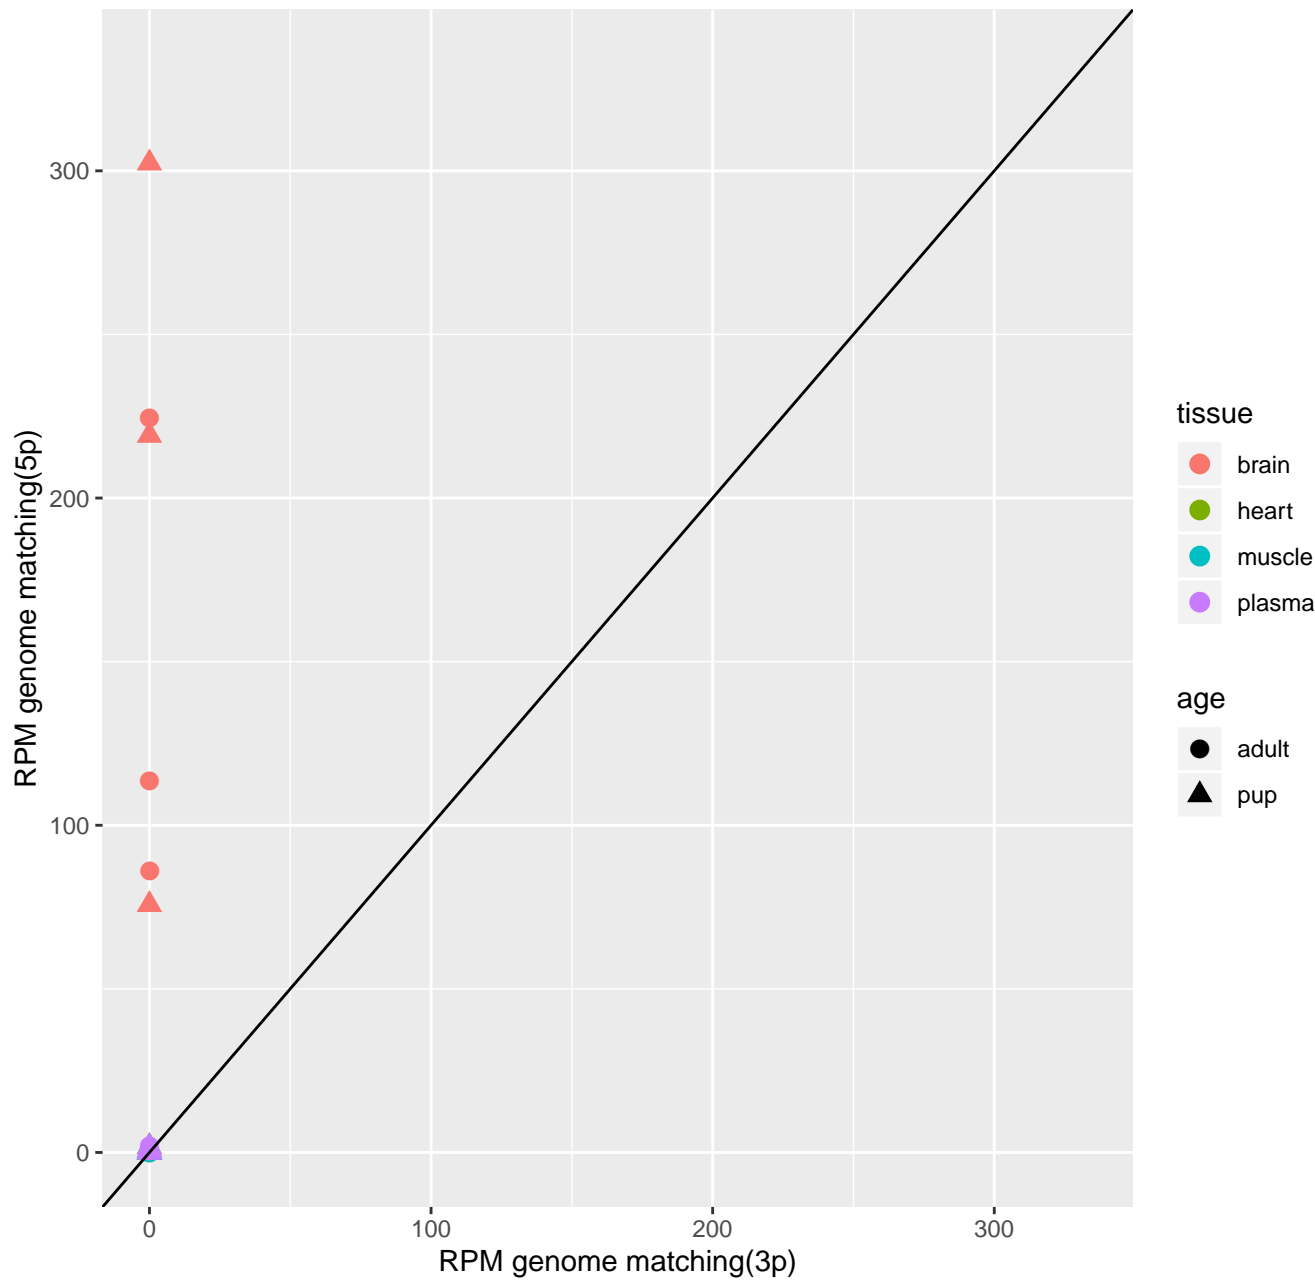



## lwe-miR-873a\_loc1

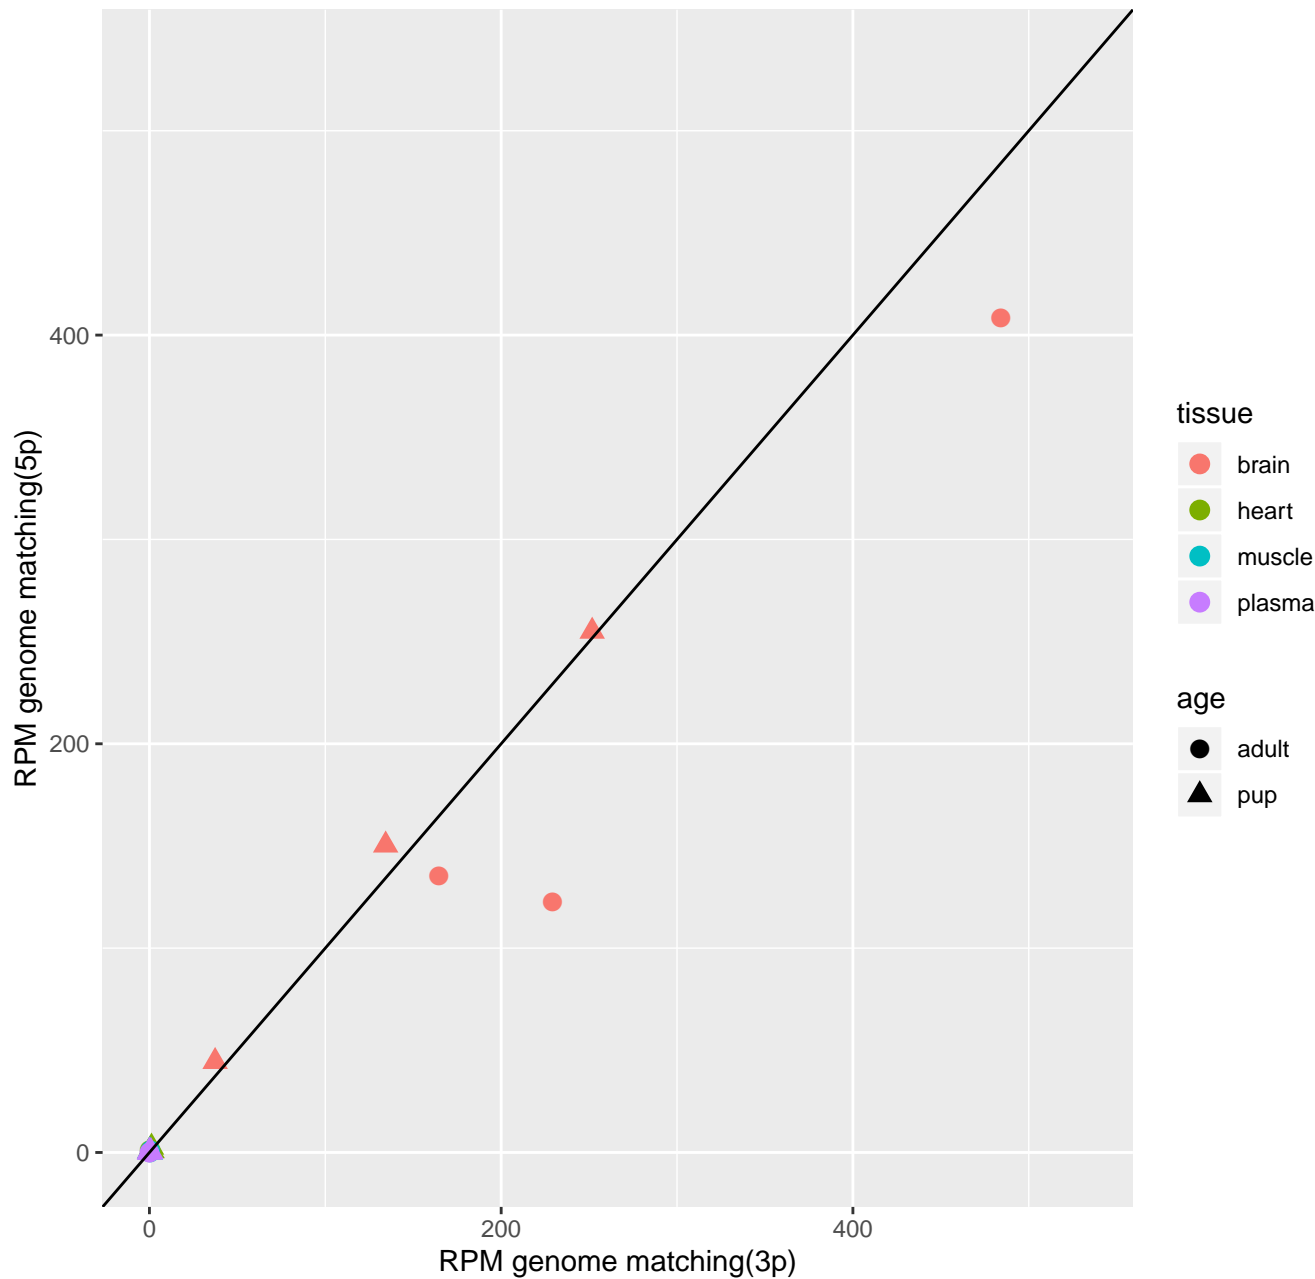

# lwe-miR-876\_loc1

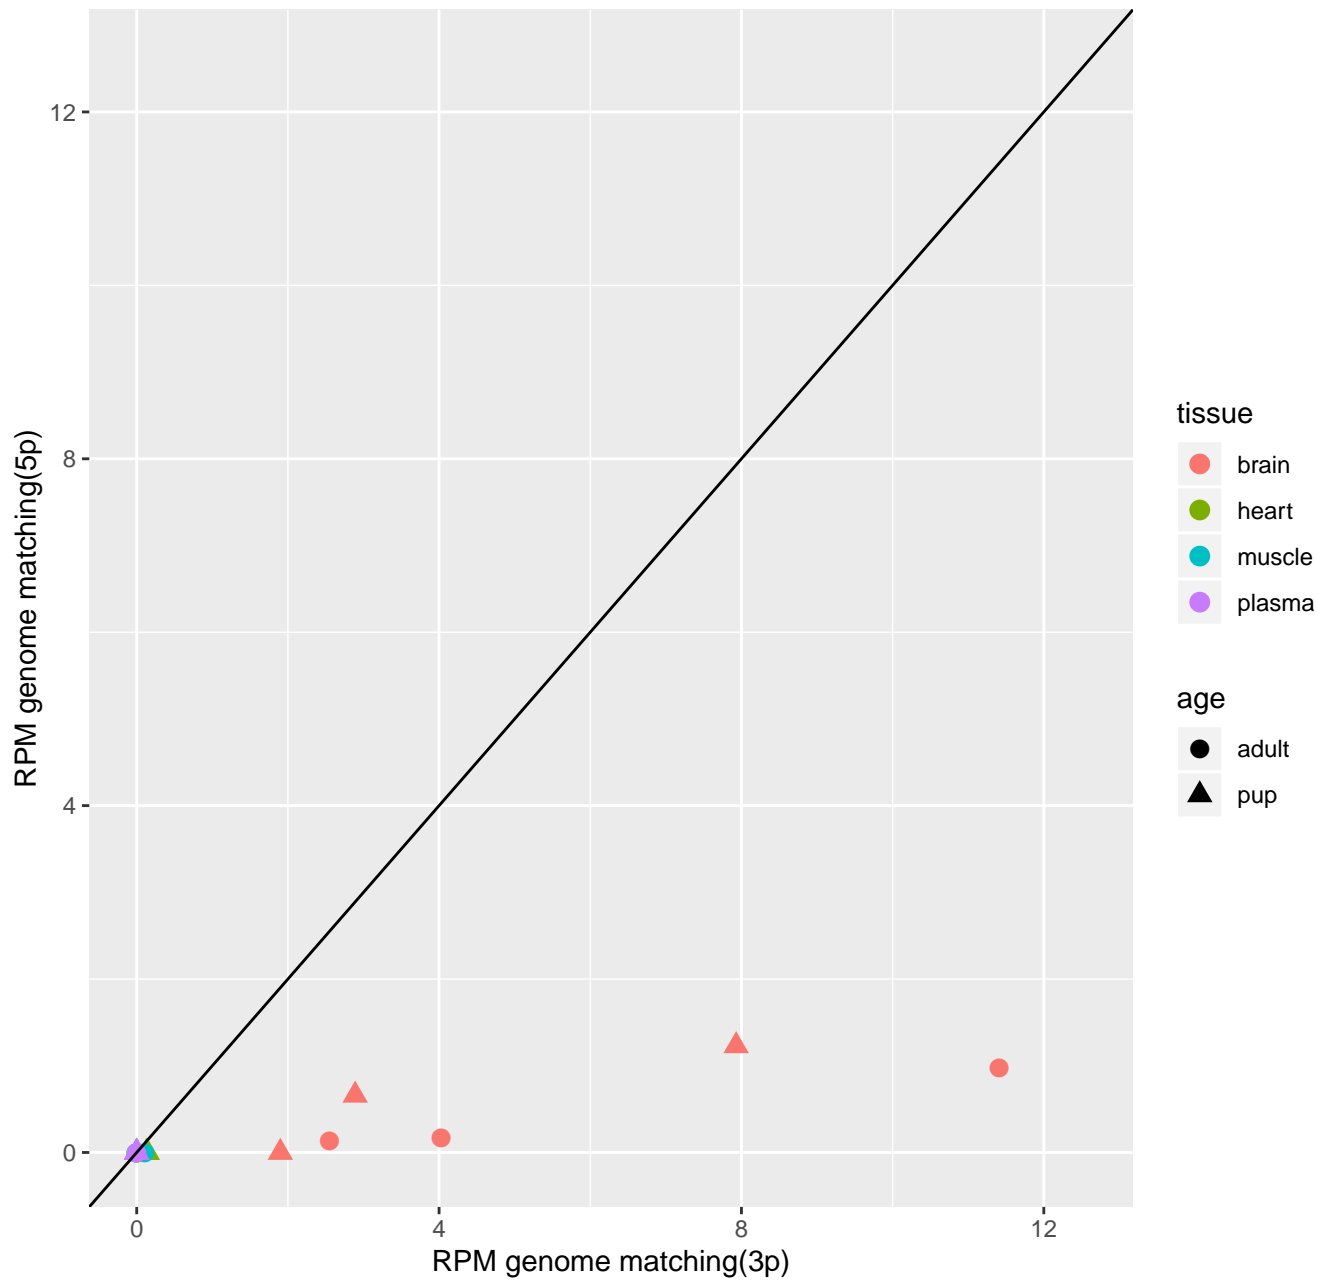

## lve-miR-2483\_loc1

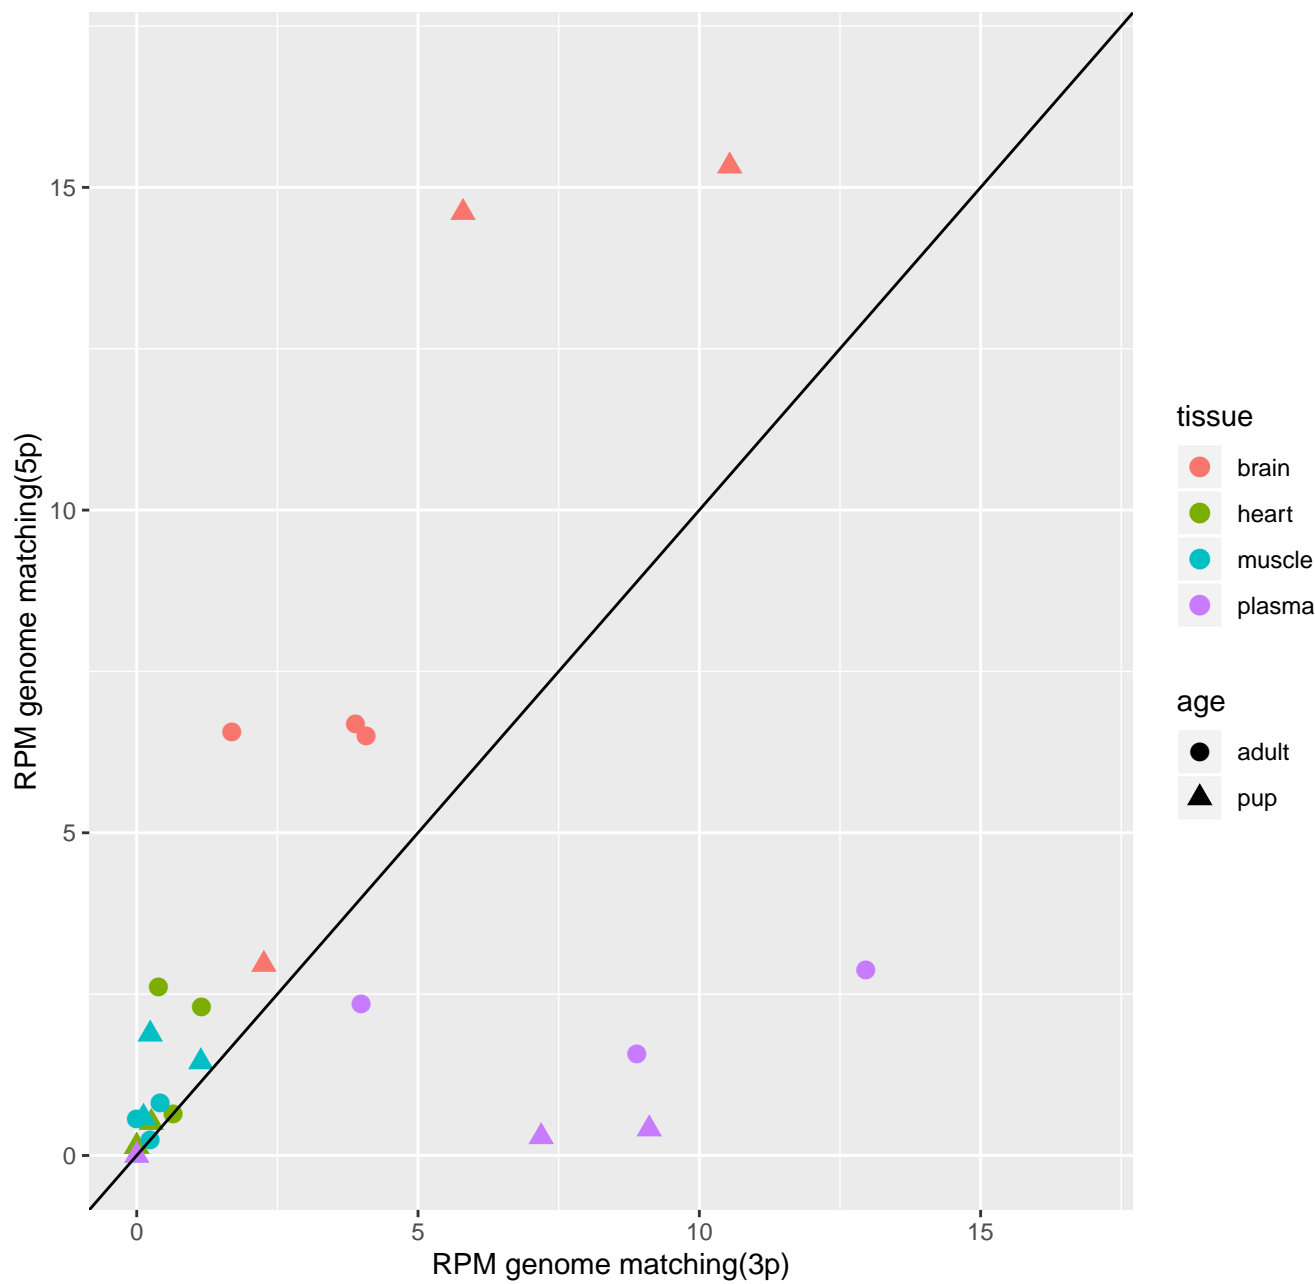

## lwe-miR-383\_loc1

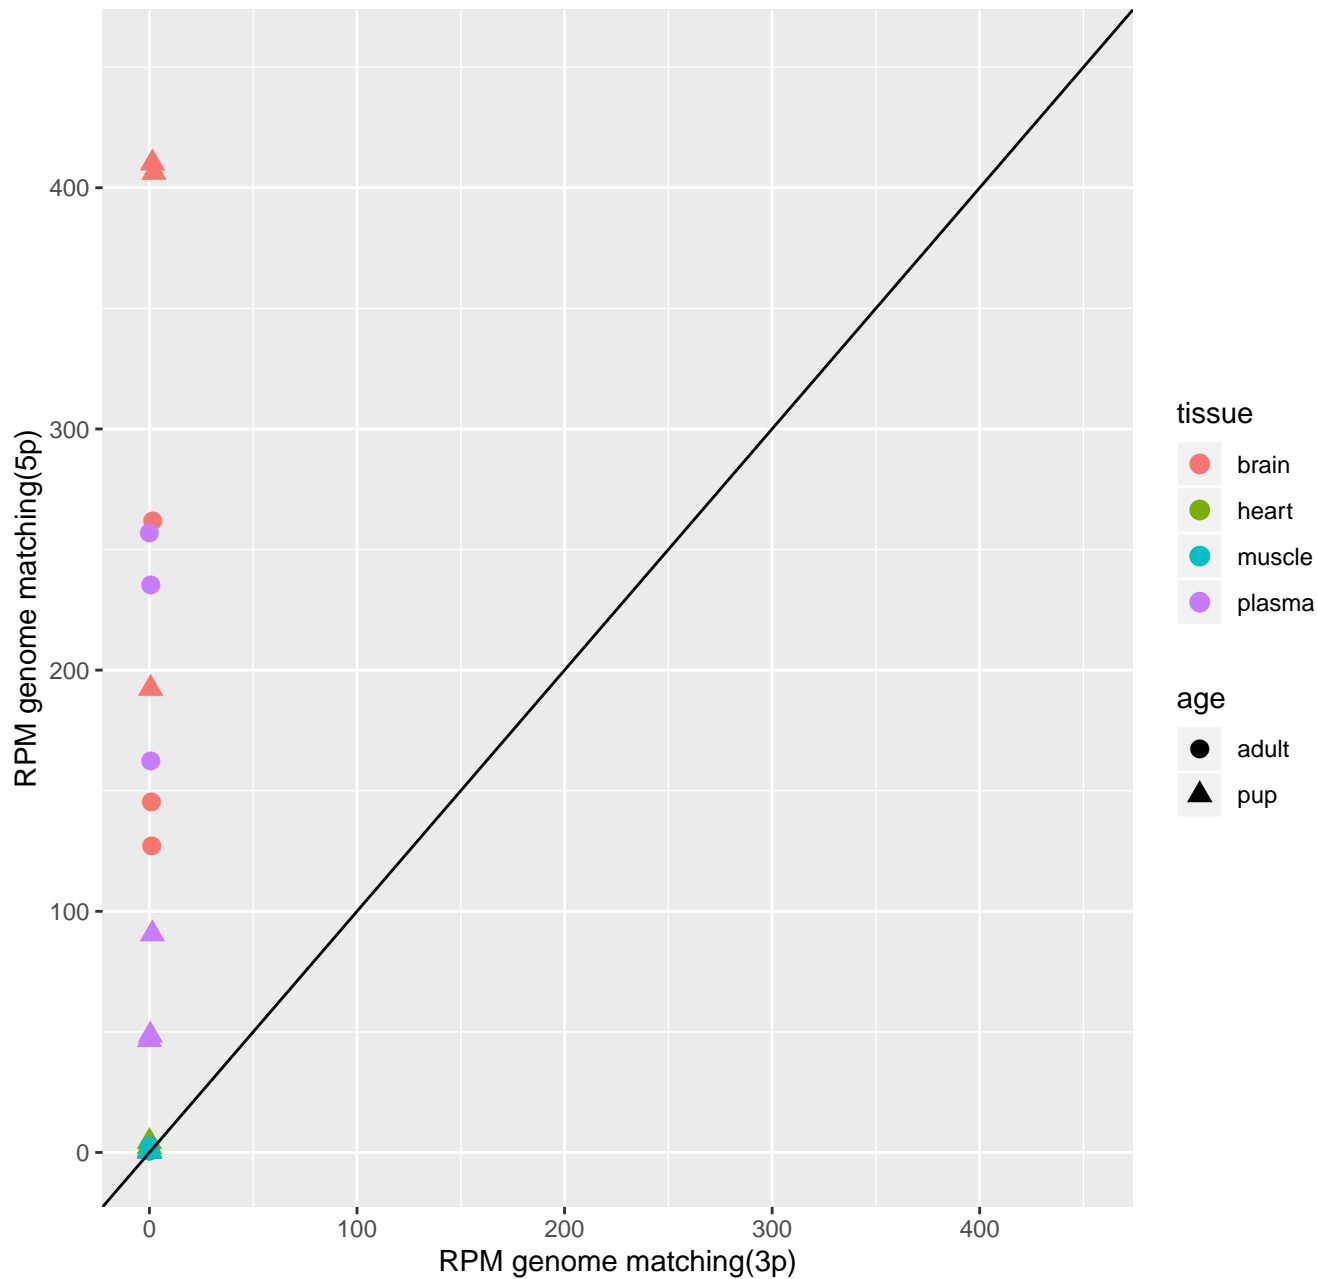

# lwe-miR-499\_loc1

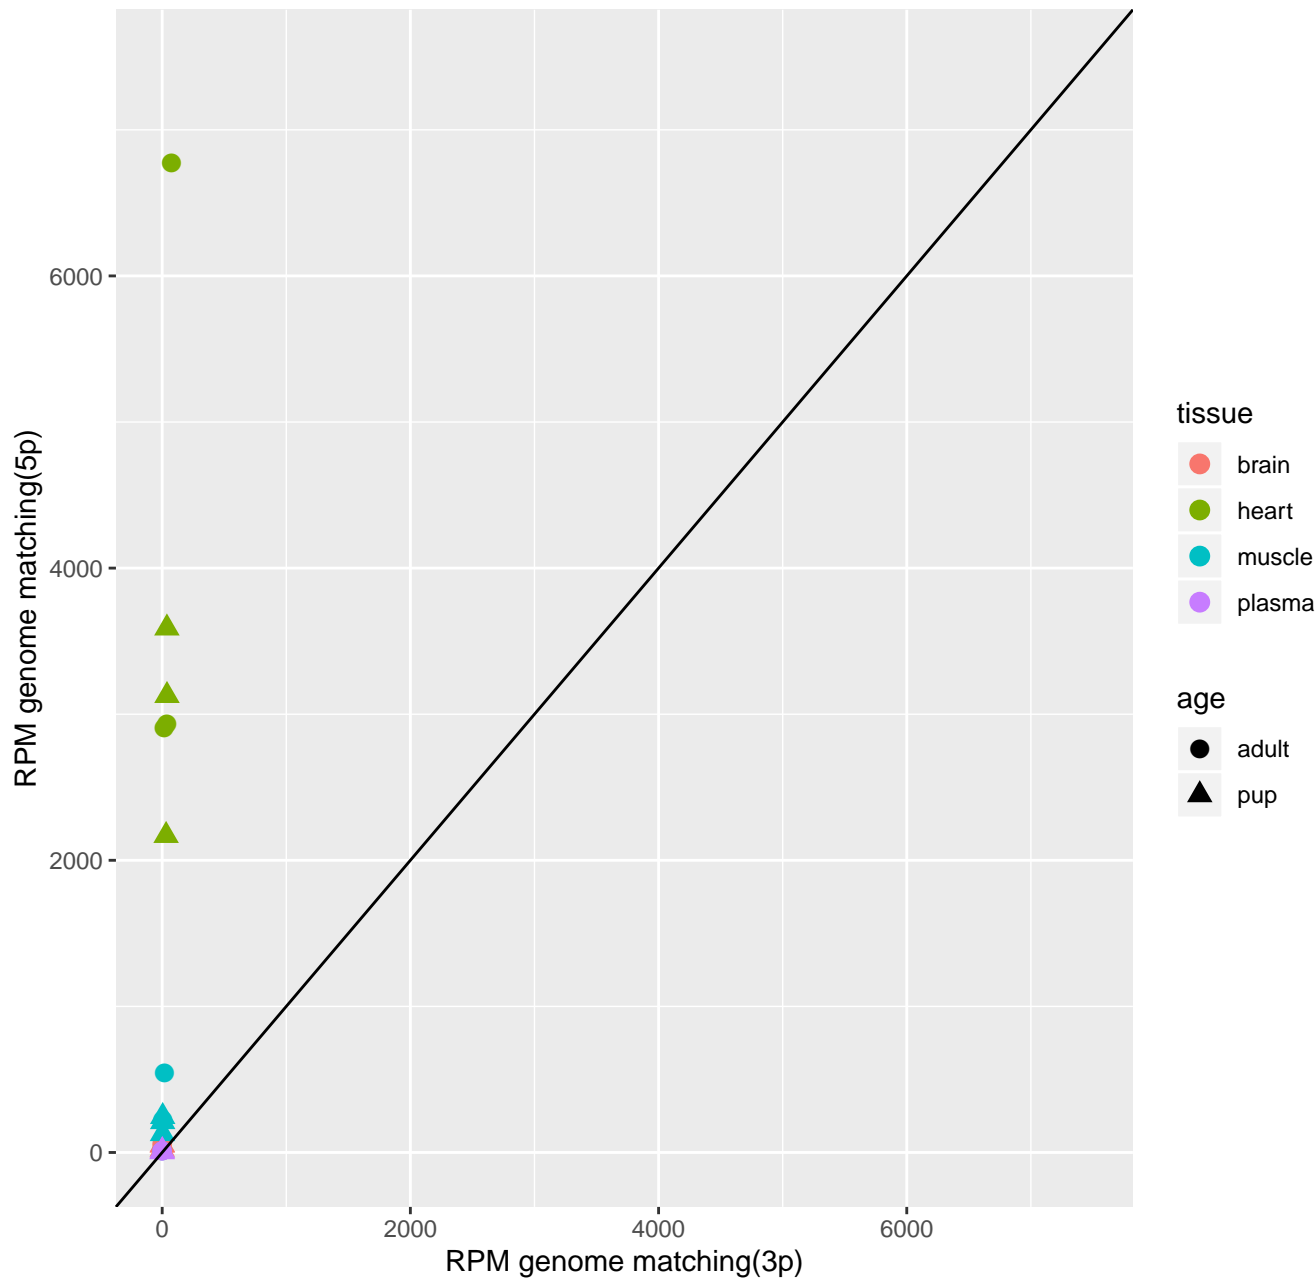

## lwe-miR-9b\_loc1

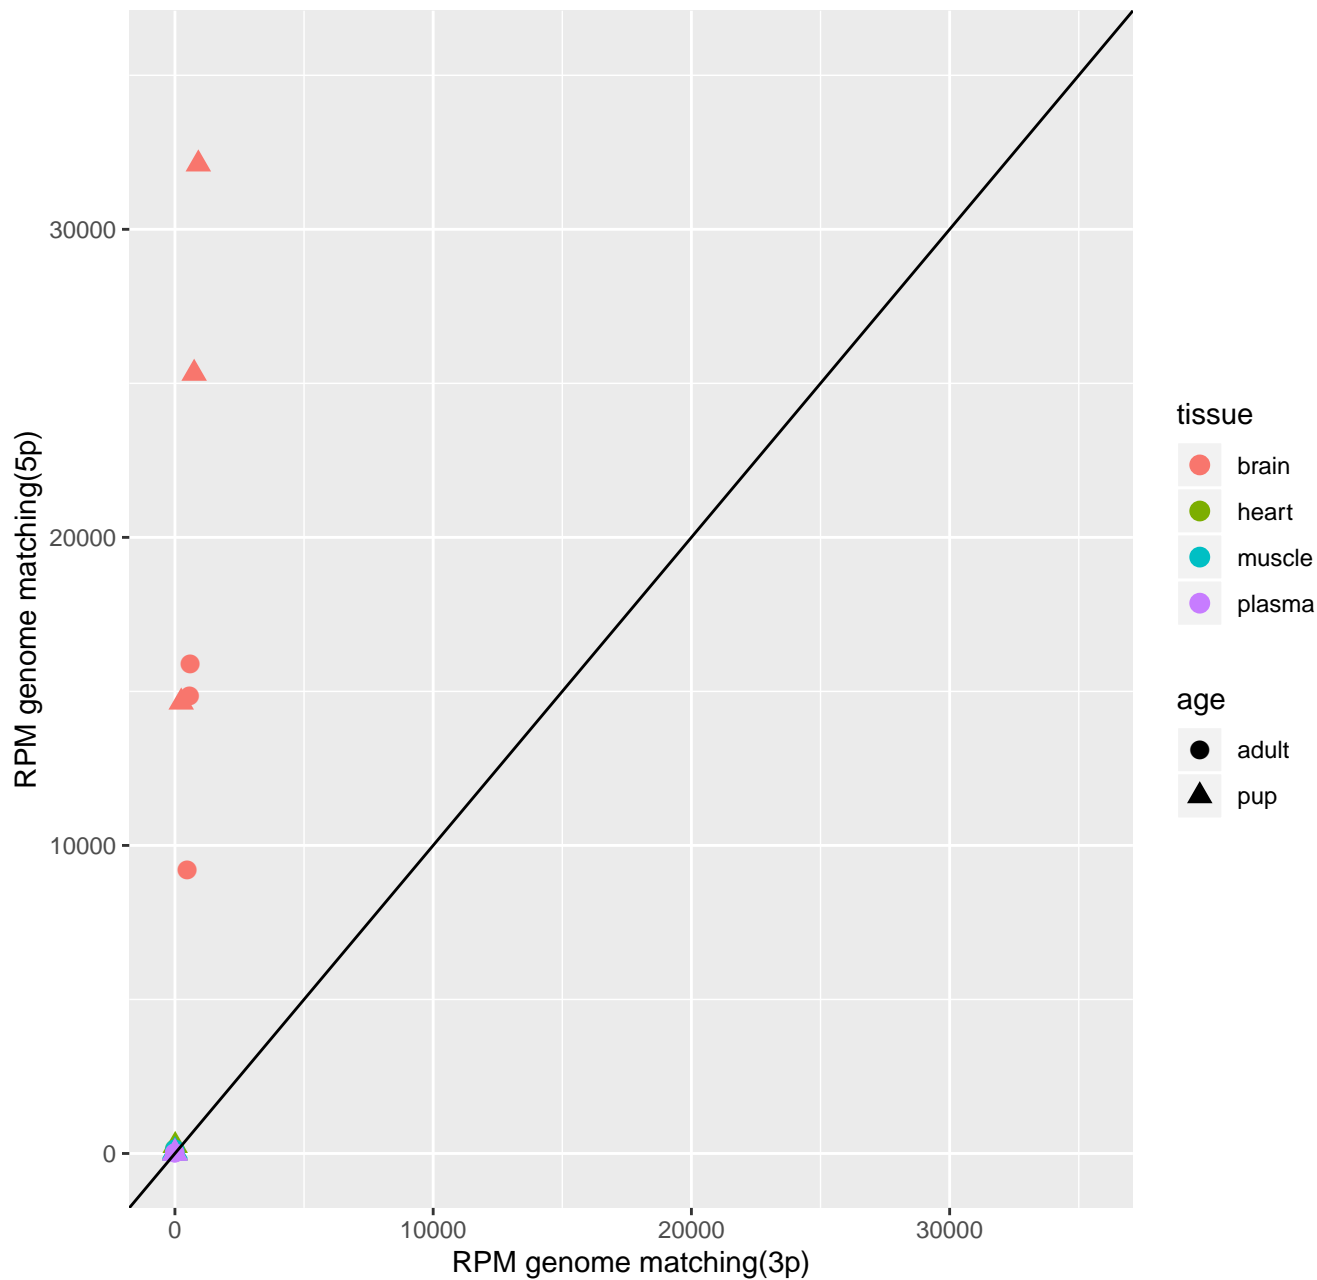

# lwe-miR-137\_loc1

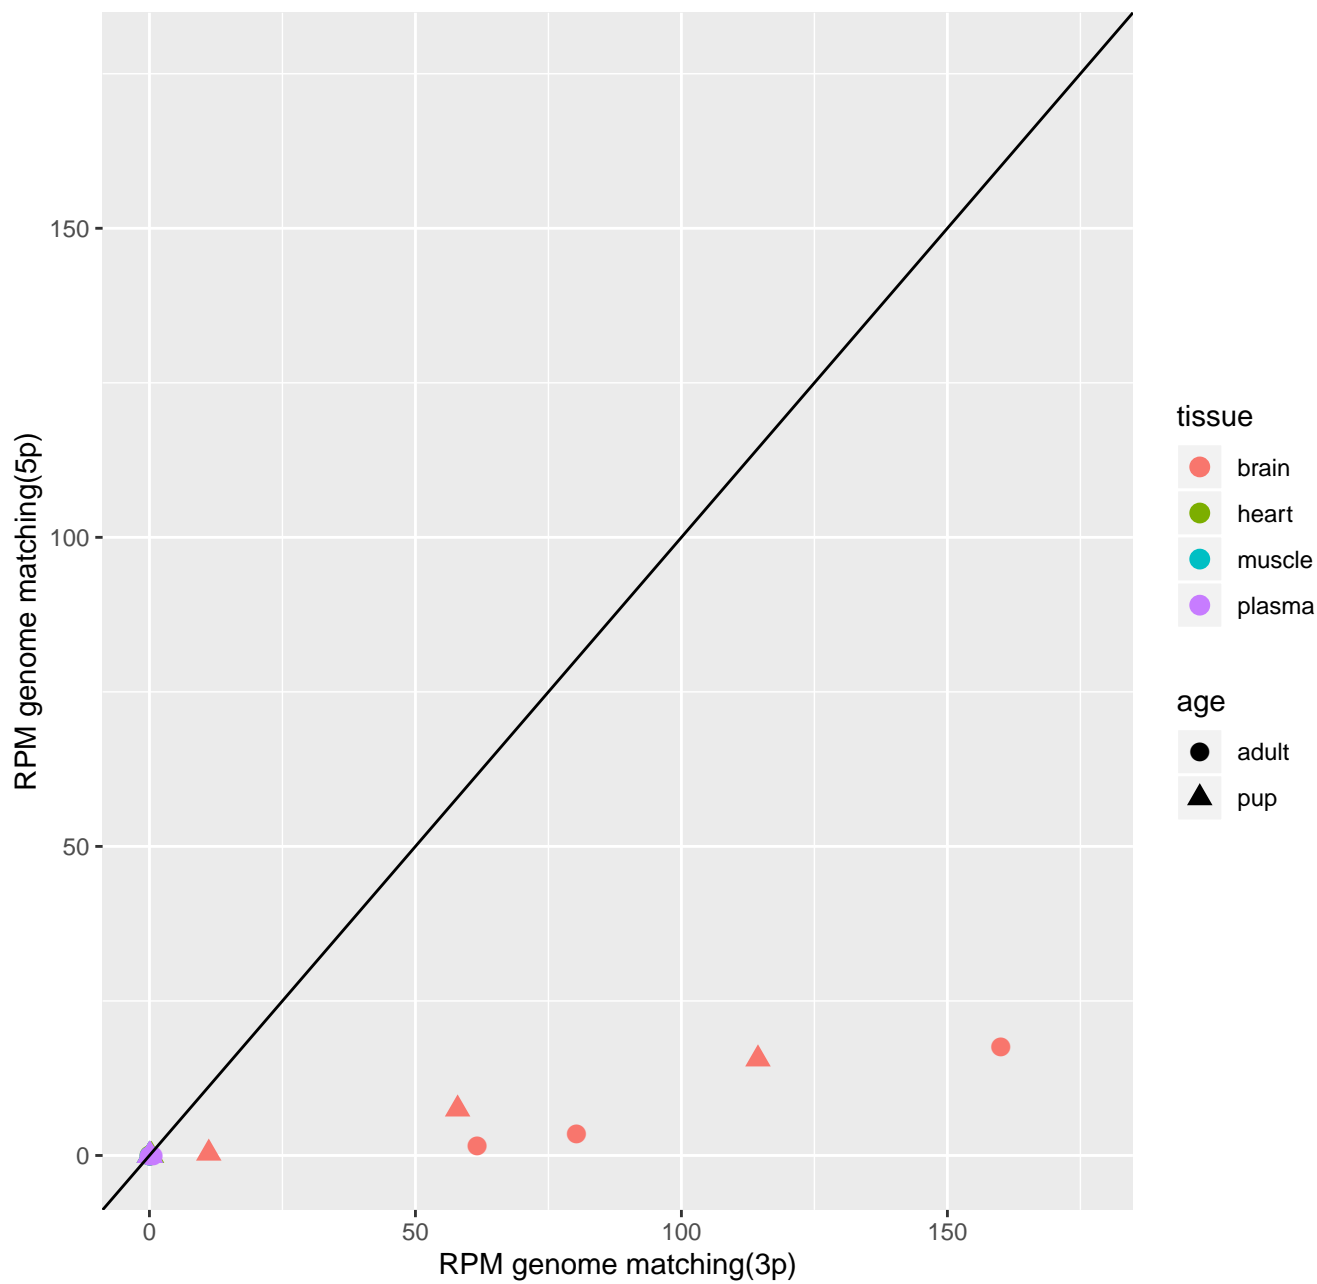

# lwe-miR-186\_loc1

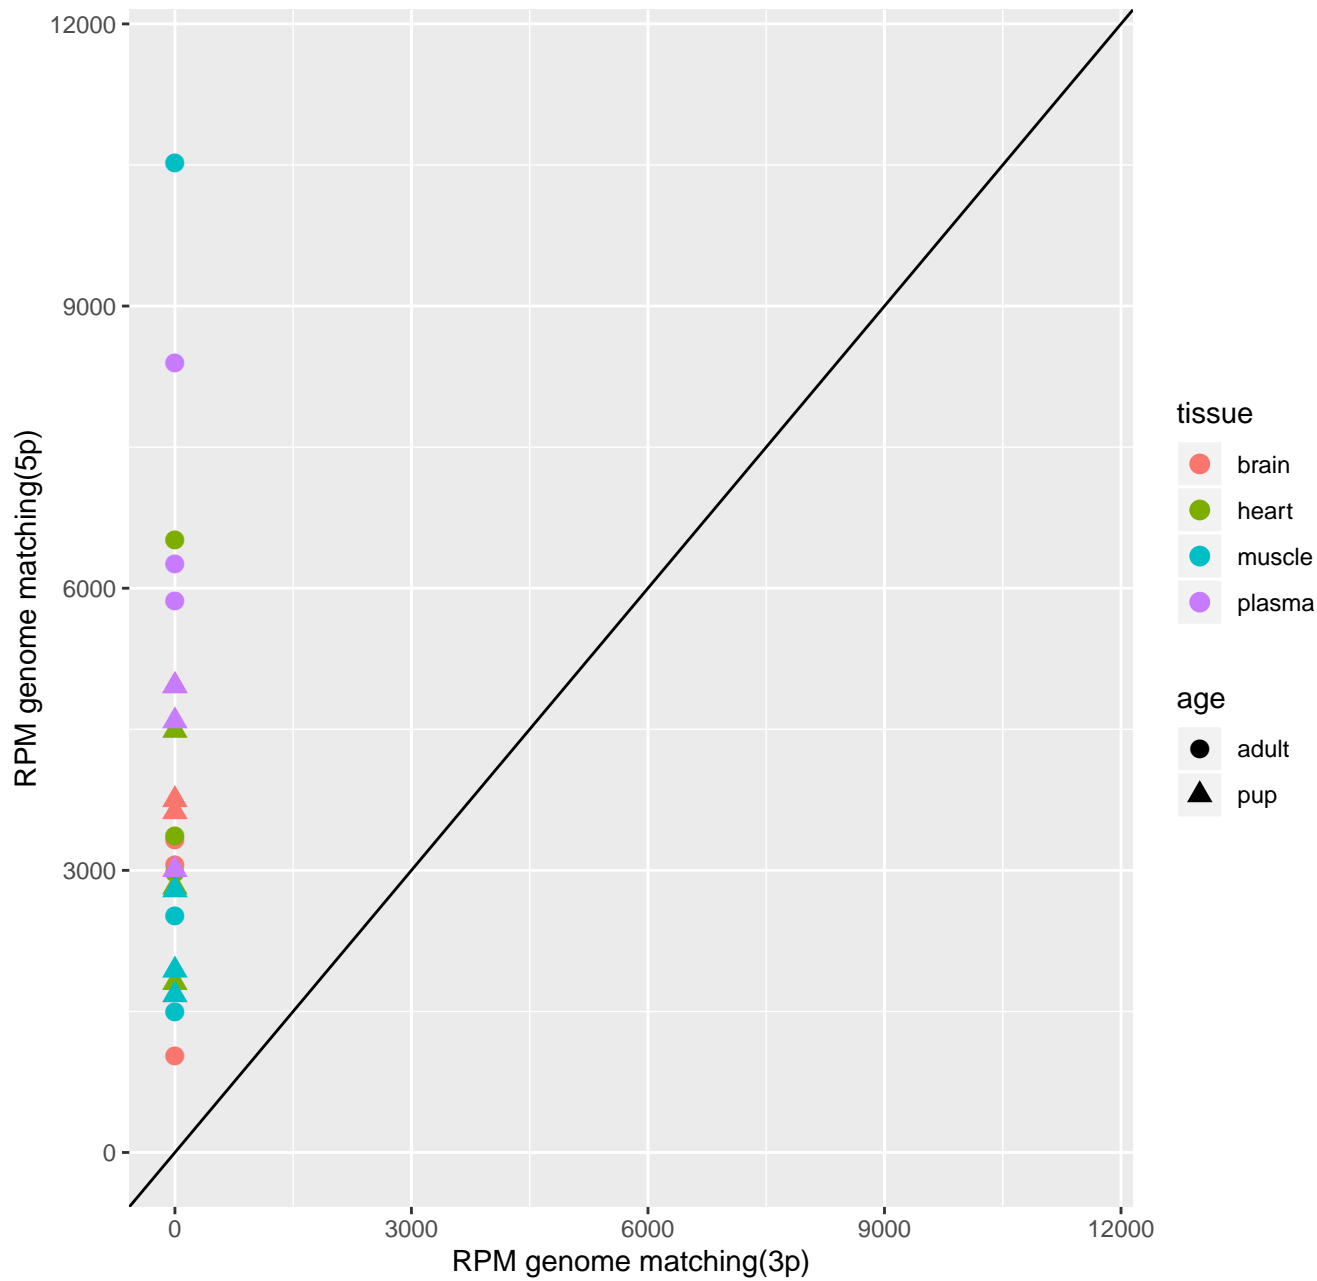



## lwe-miR-361\_loc1

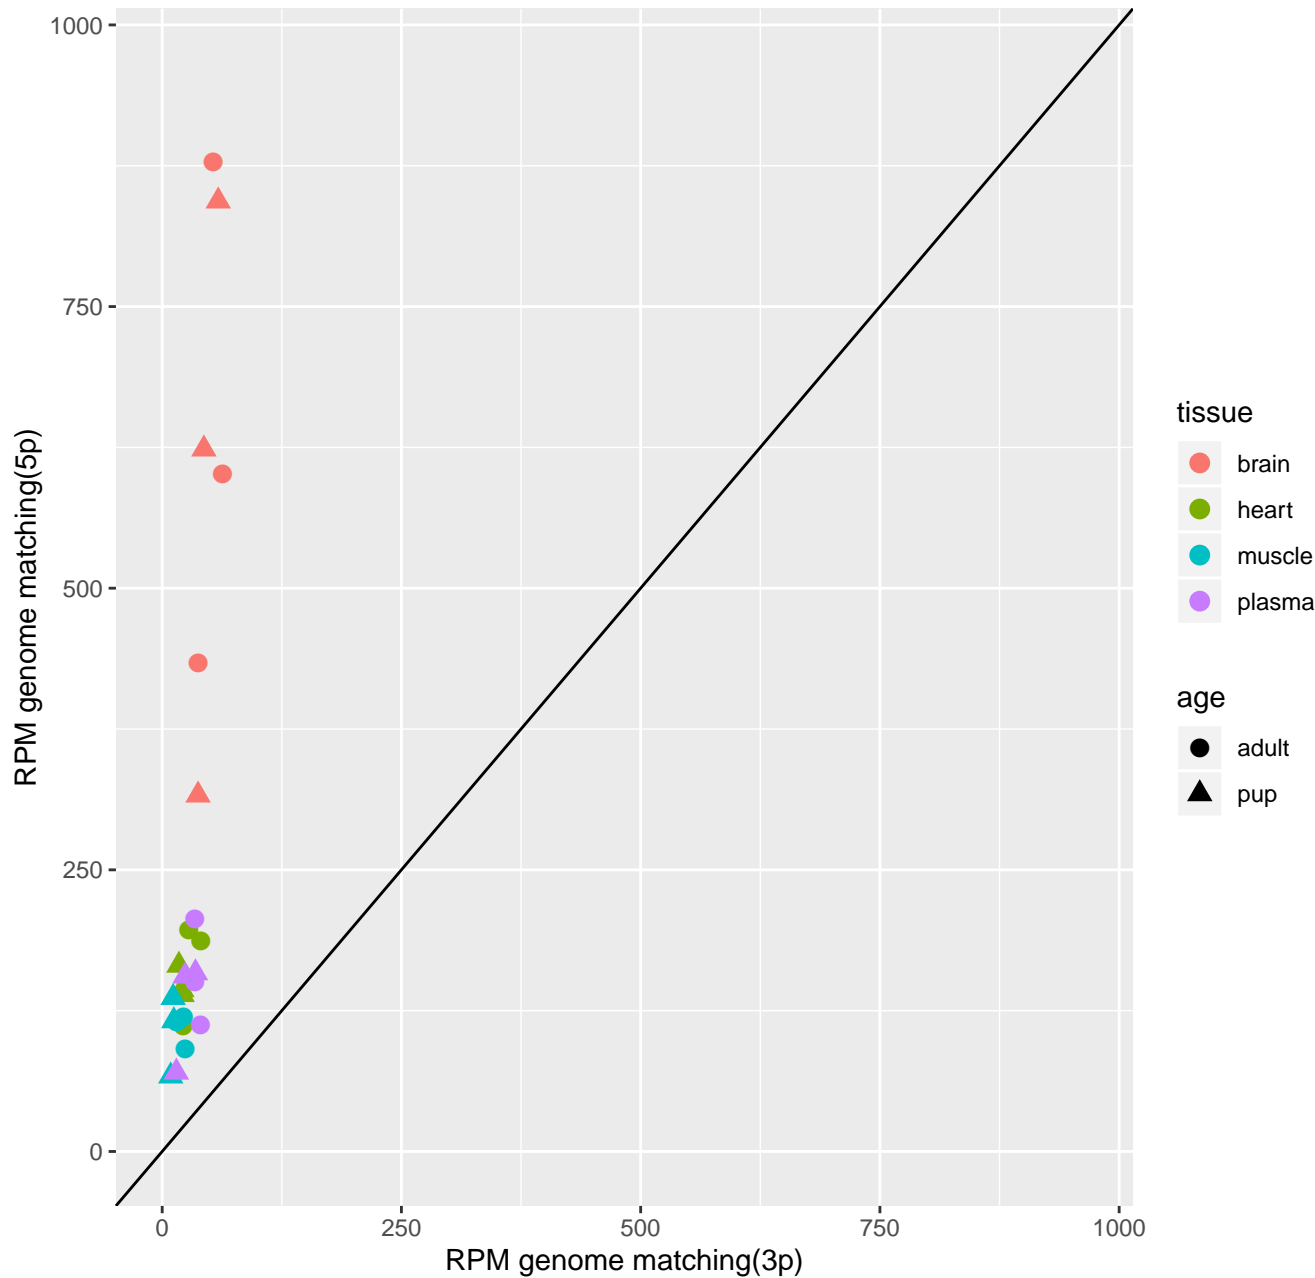



novel\_1

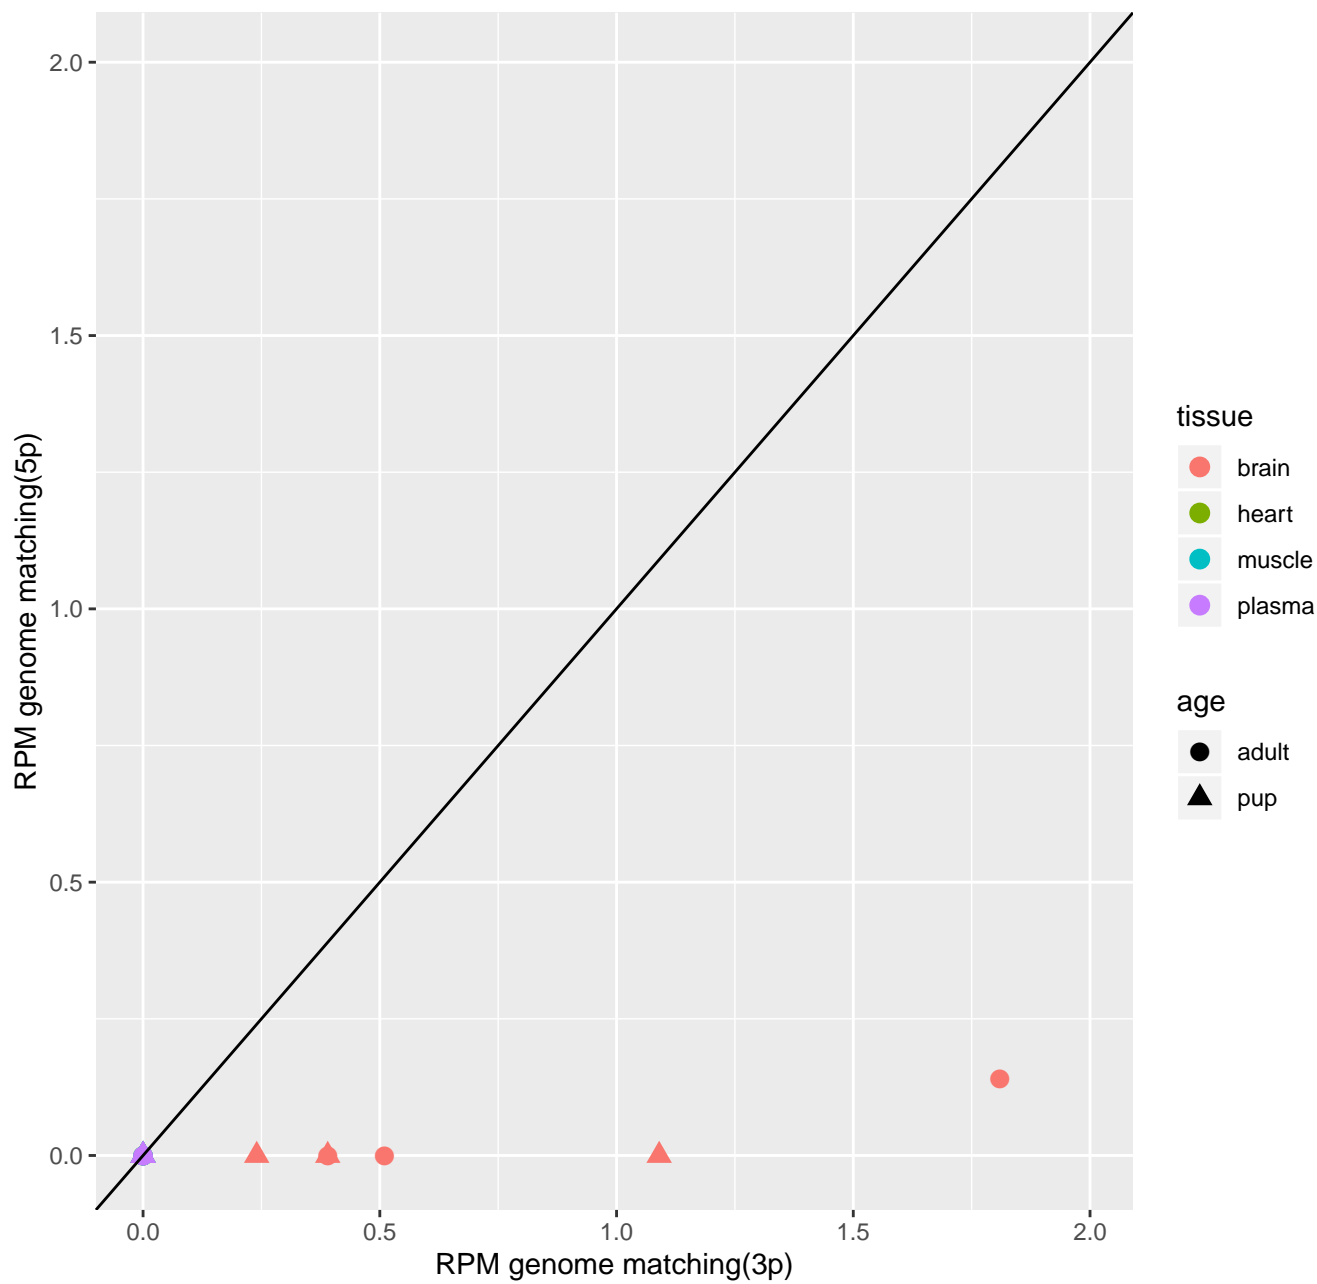

# lwe-miR-448\_loc1

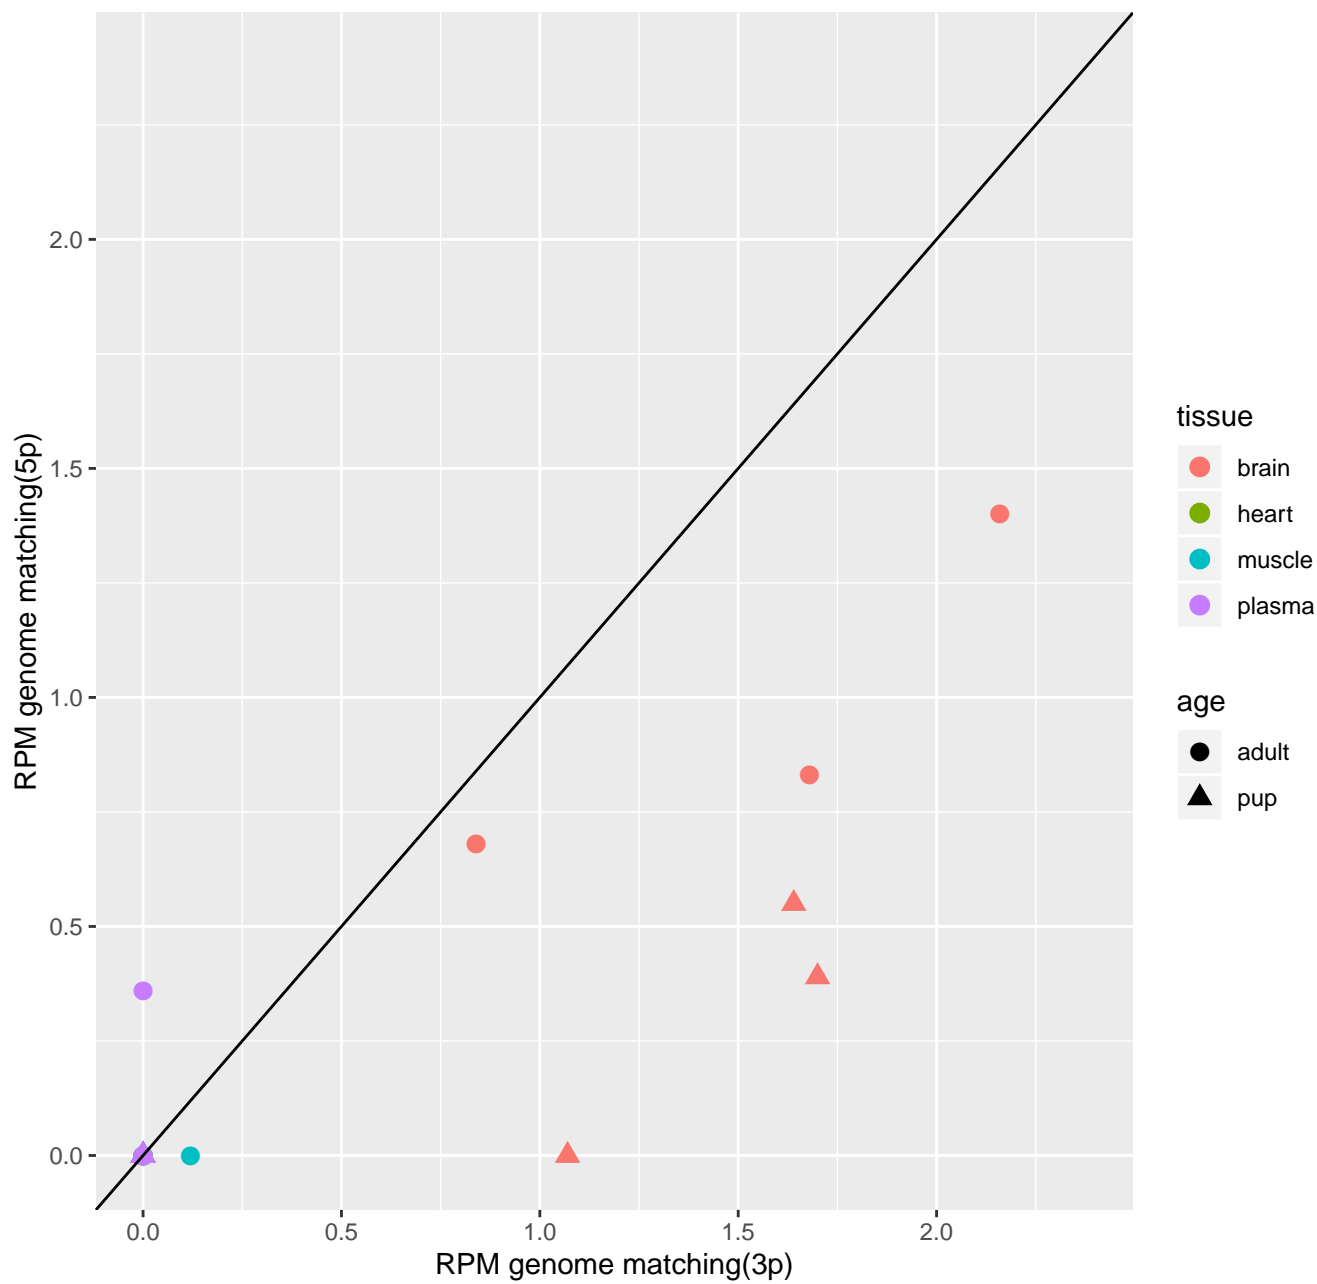

# lwe-miR-1911\_loc1

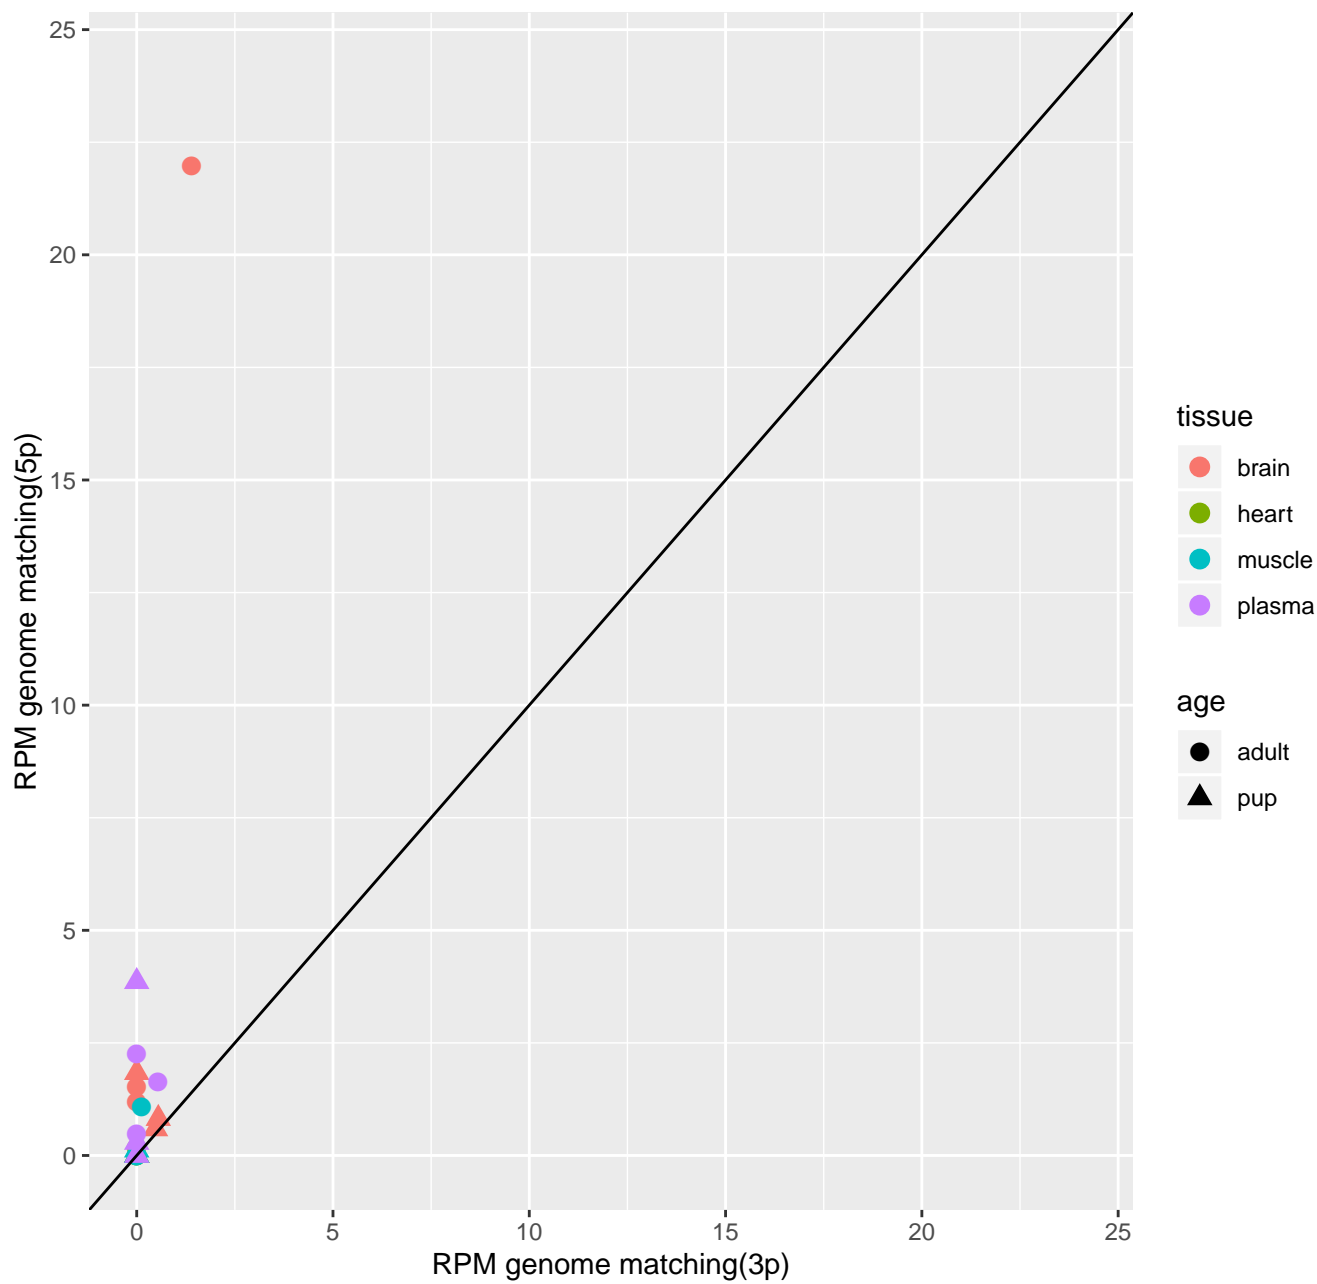

## lwe-miR-1298\_loc1

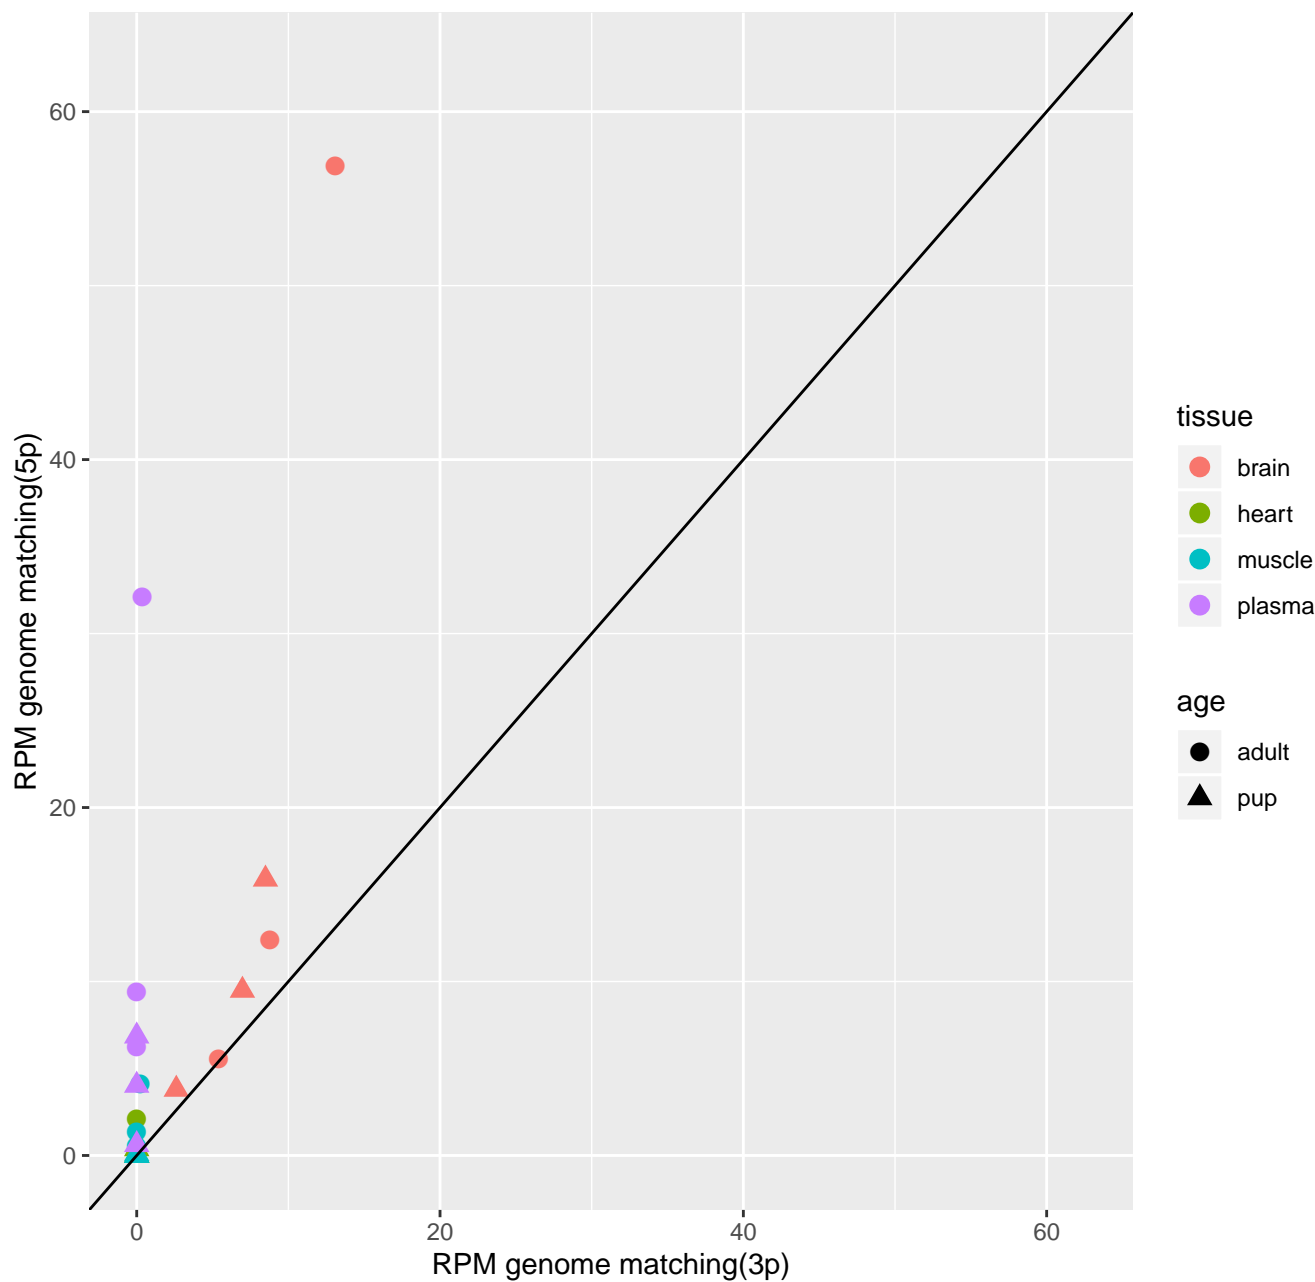

# lve-miR-1264\_loc1

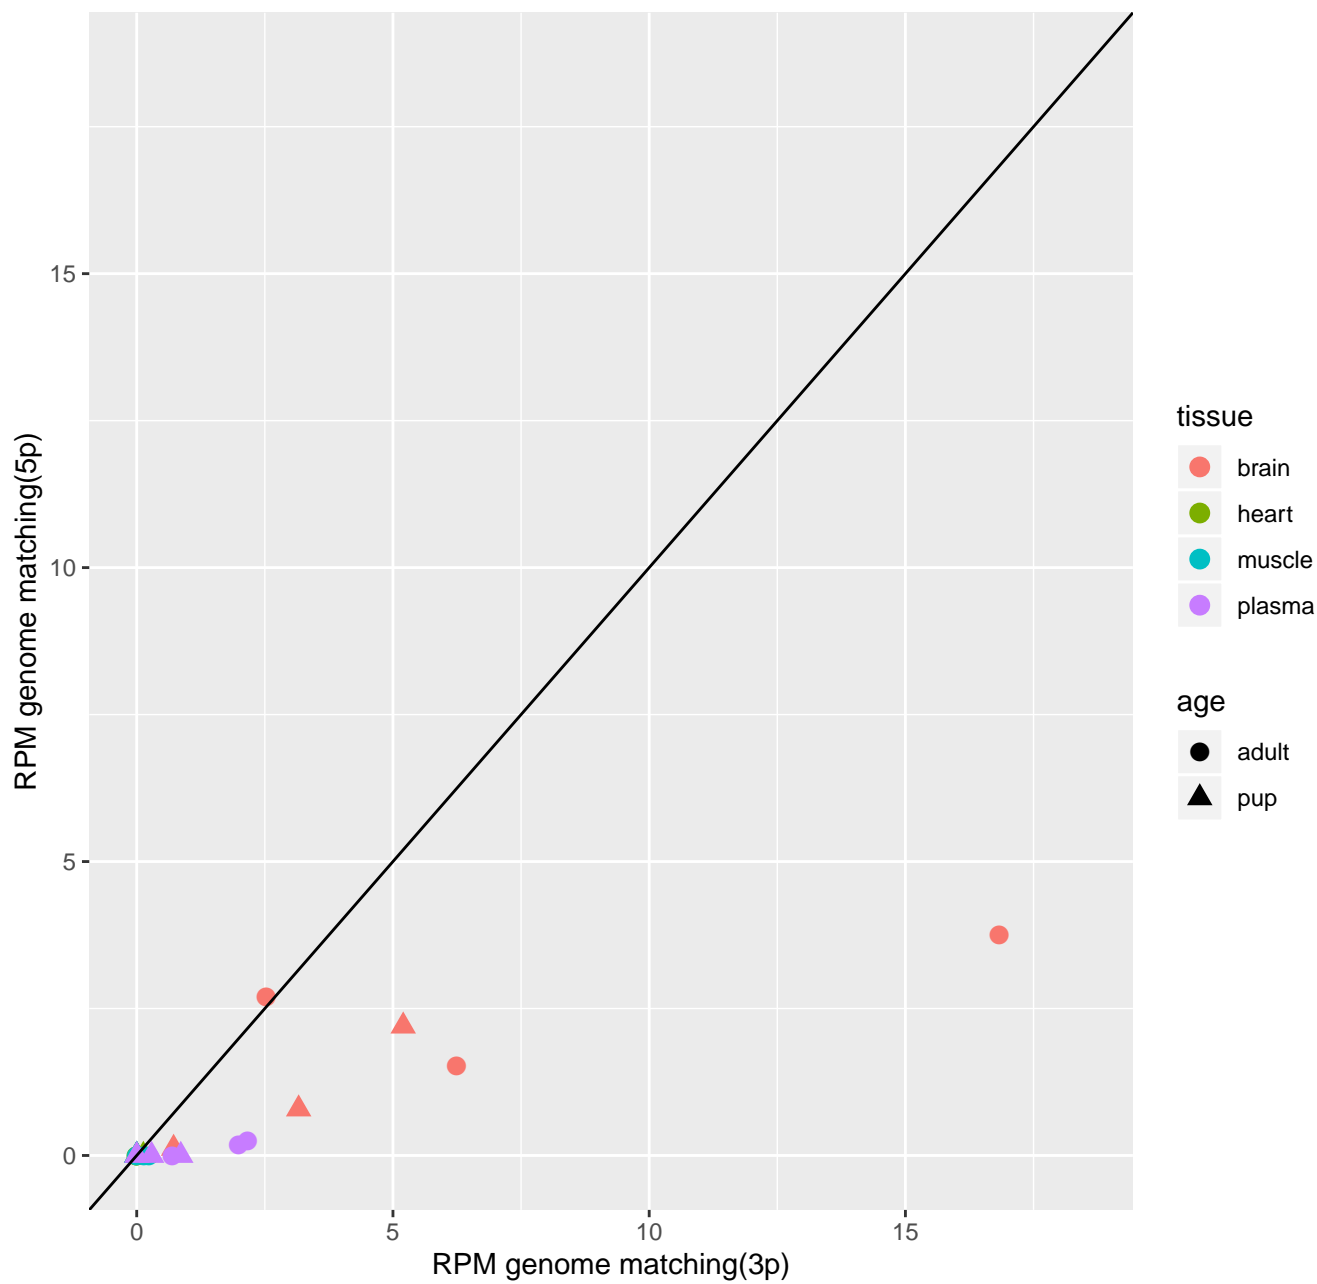

## lwe-miR-1912\_loc1

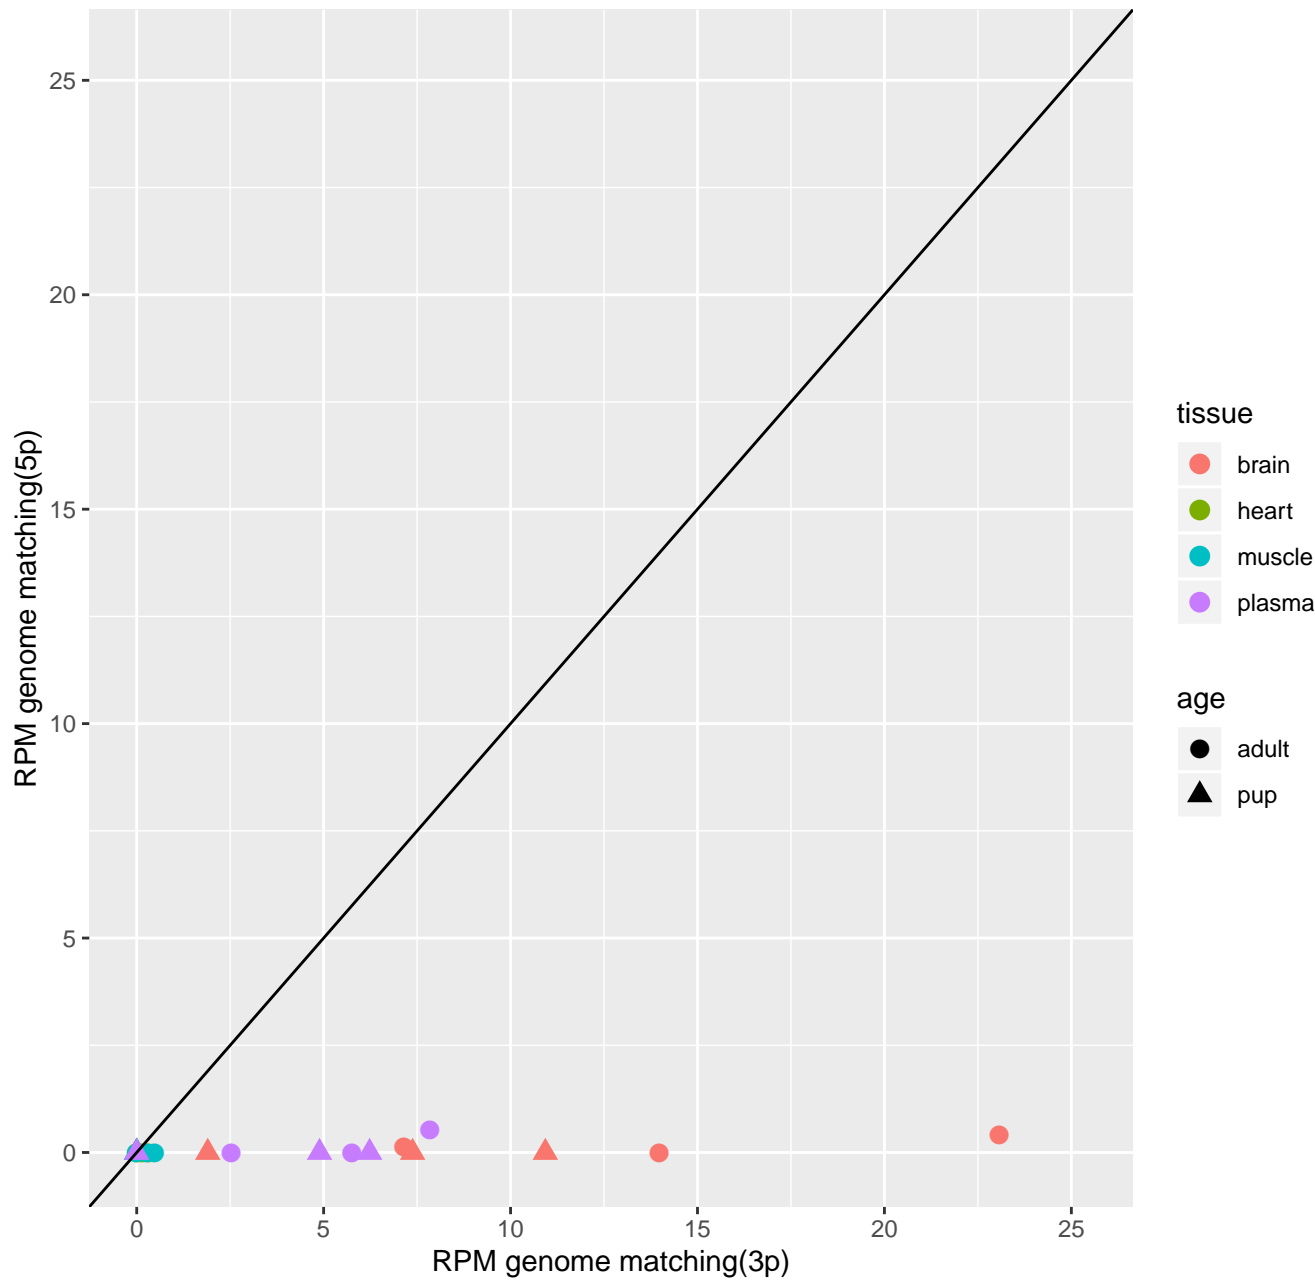



# lwe-miR-764\_loc1

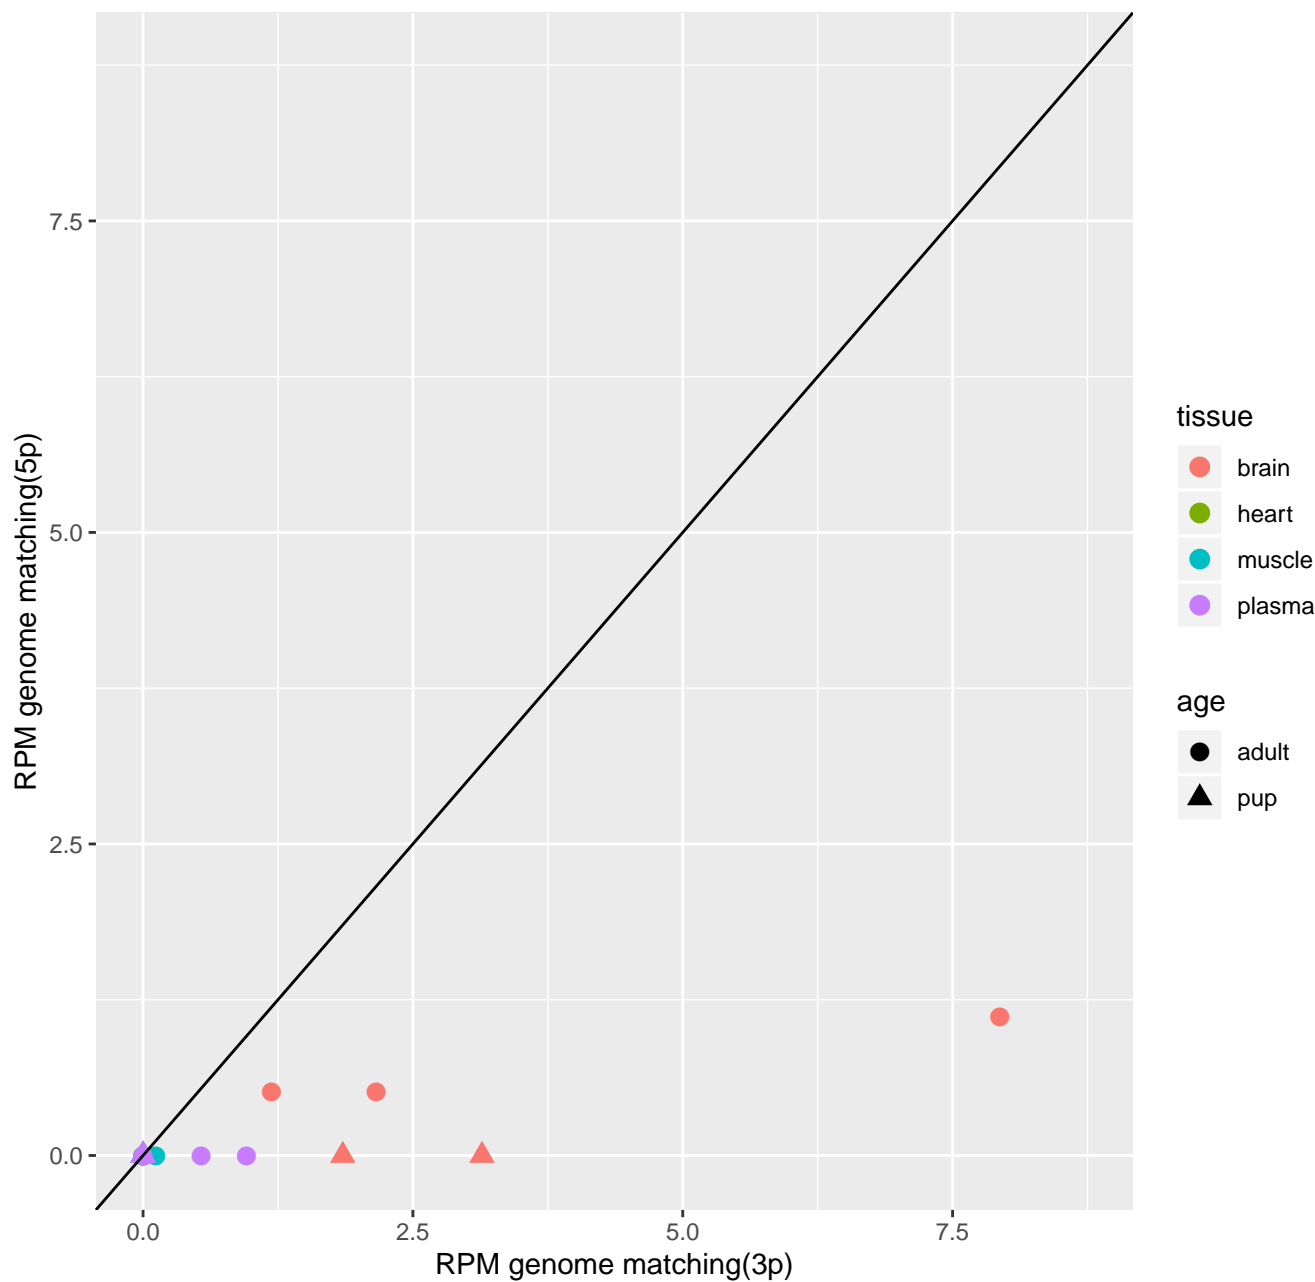

novel\_2

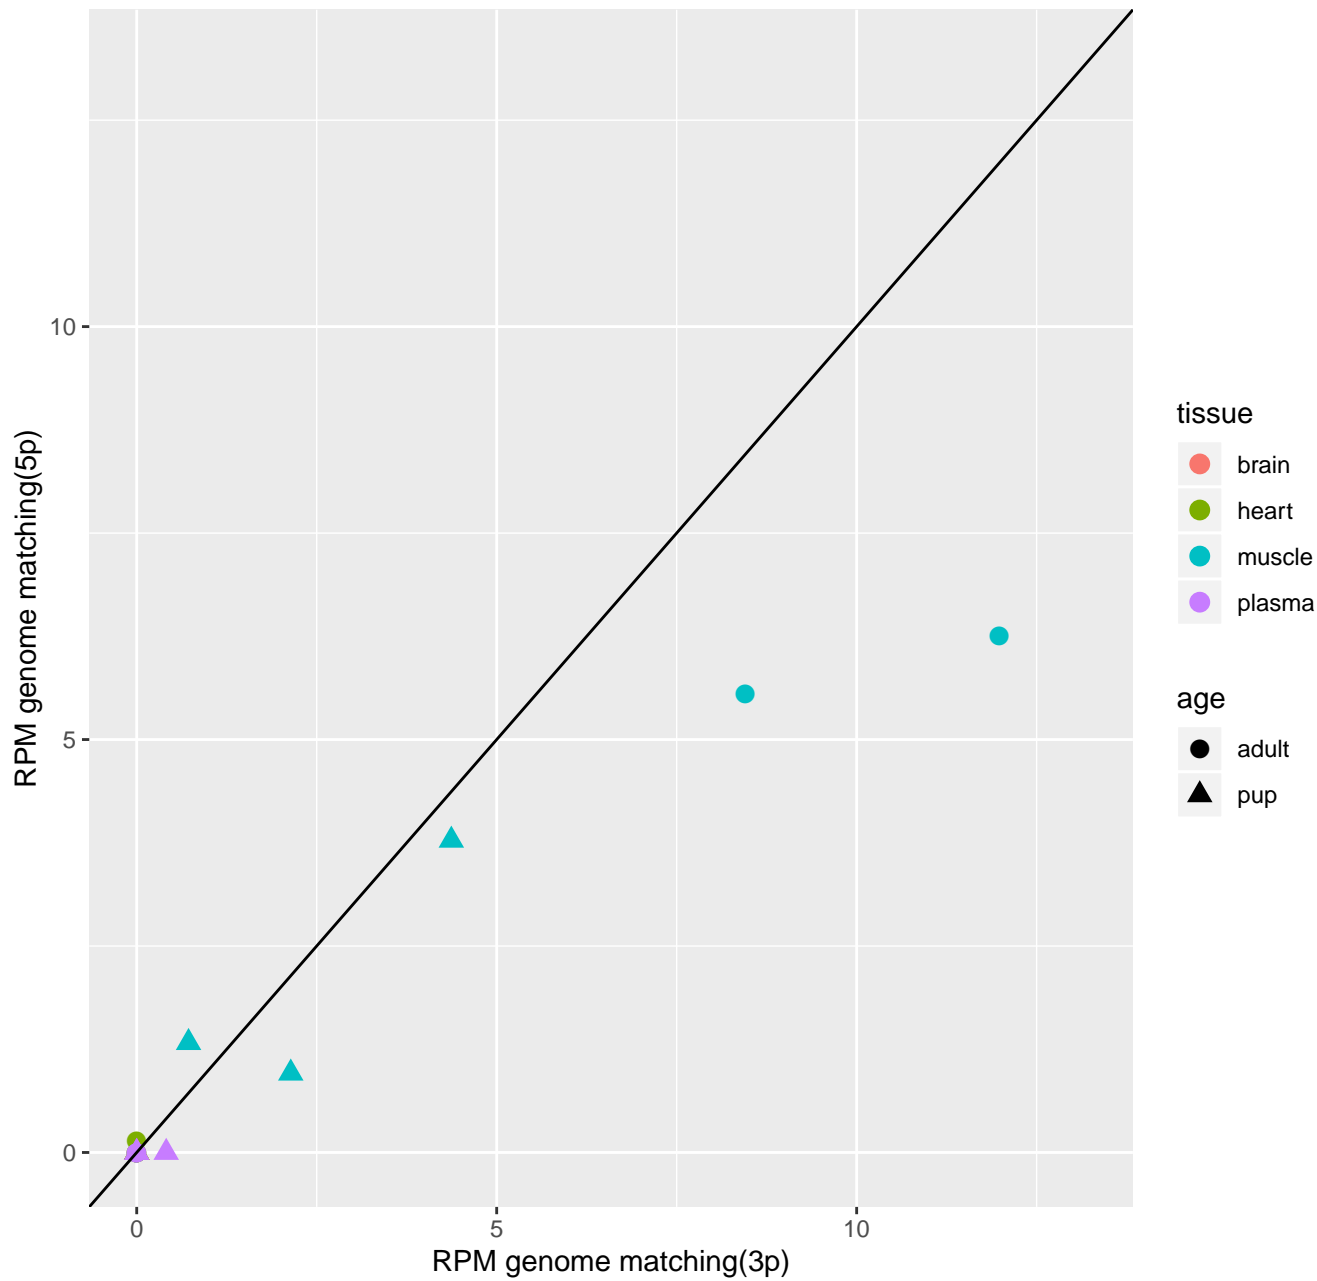

## lwe-miR-8986a\_loc1

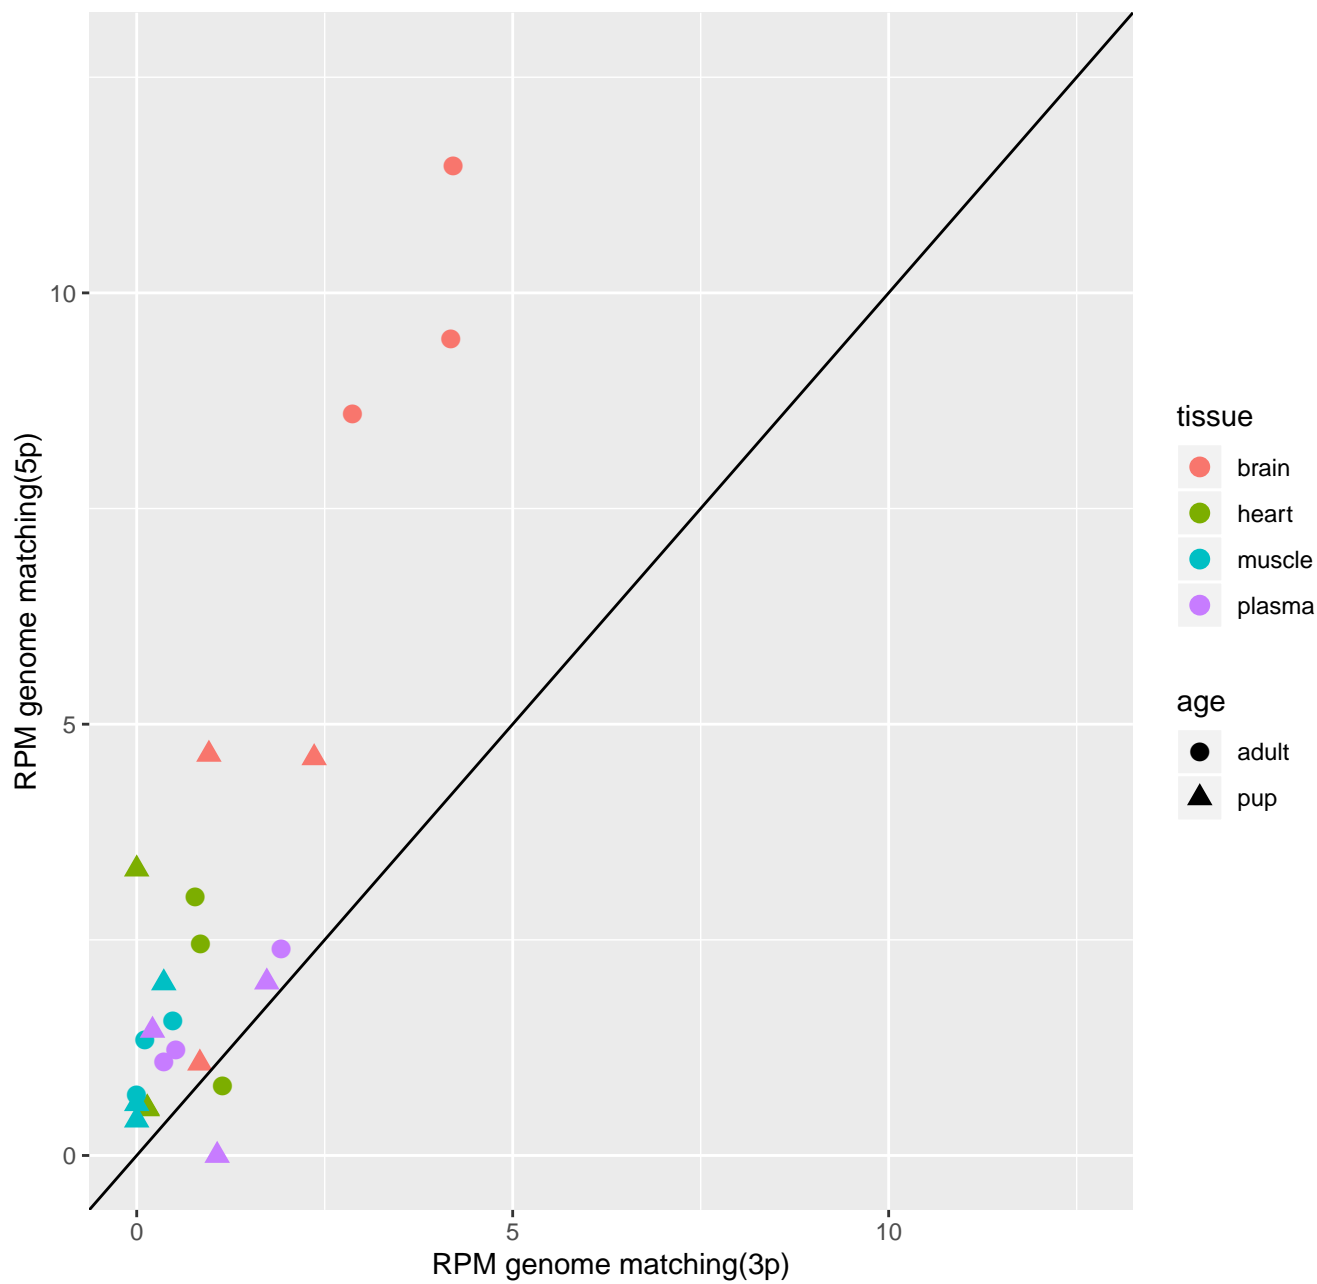

## lwe-miR-130\_loc1

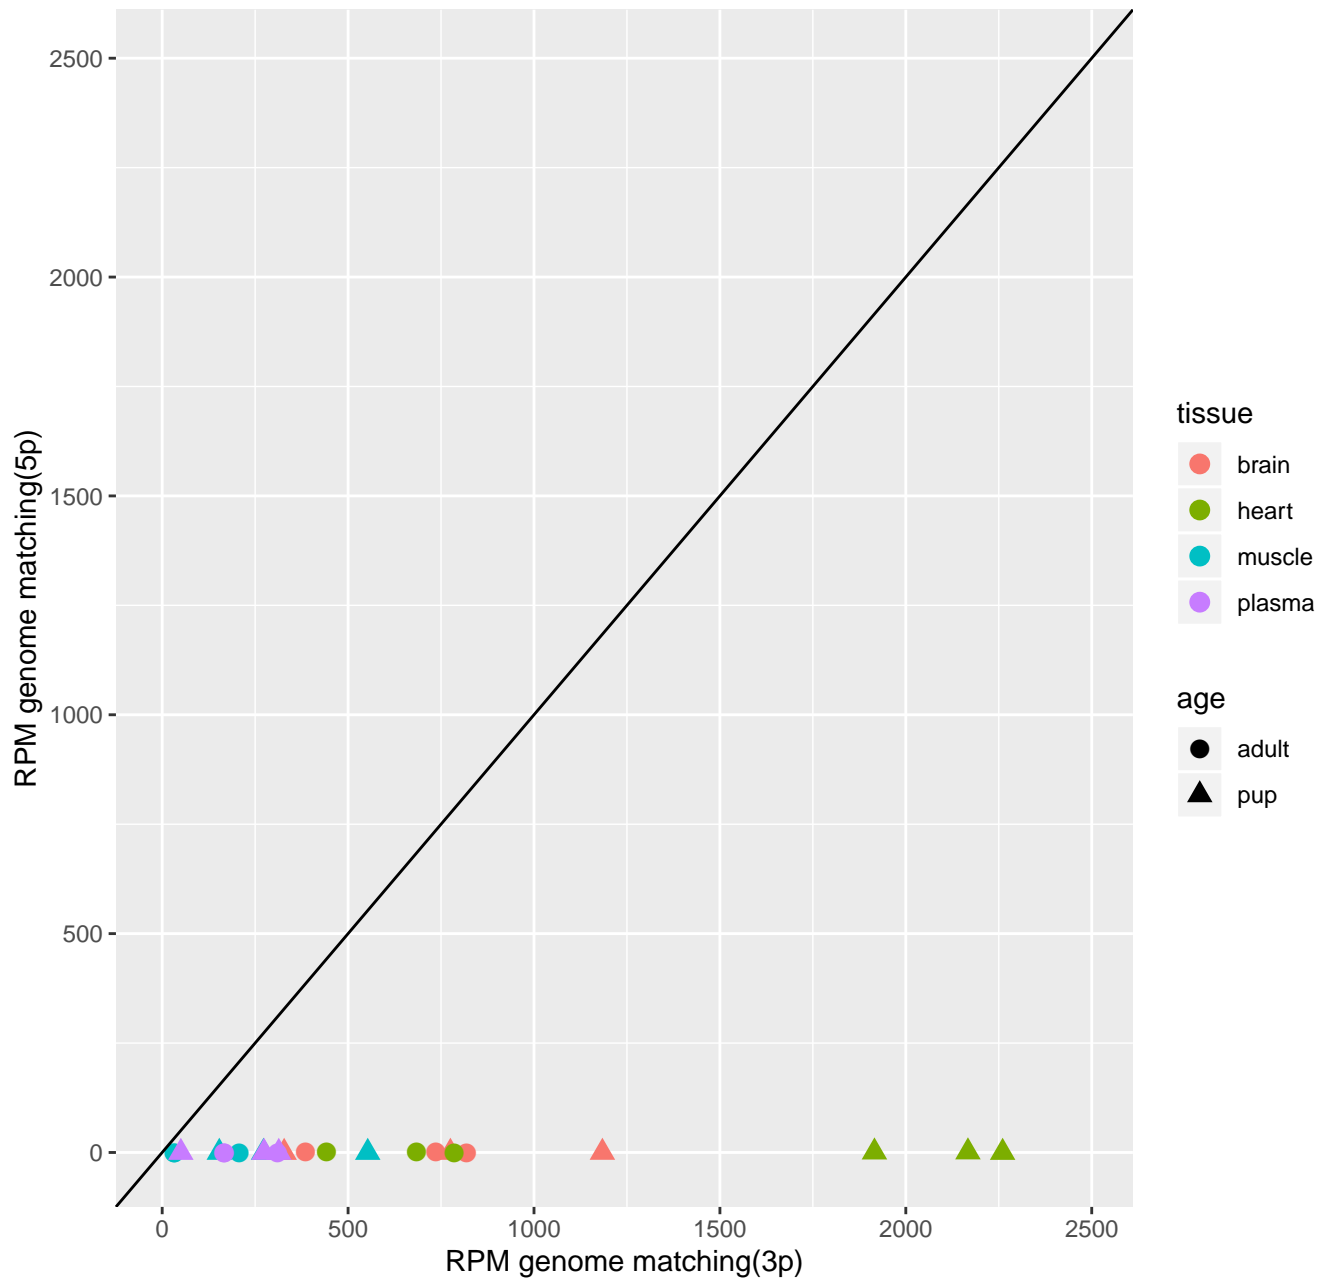

## novel\_3

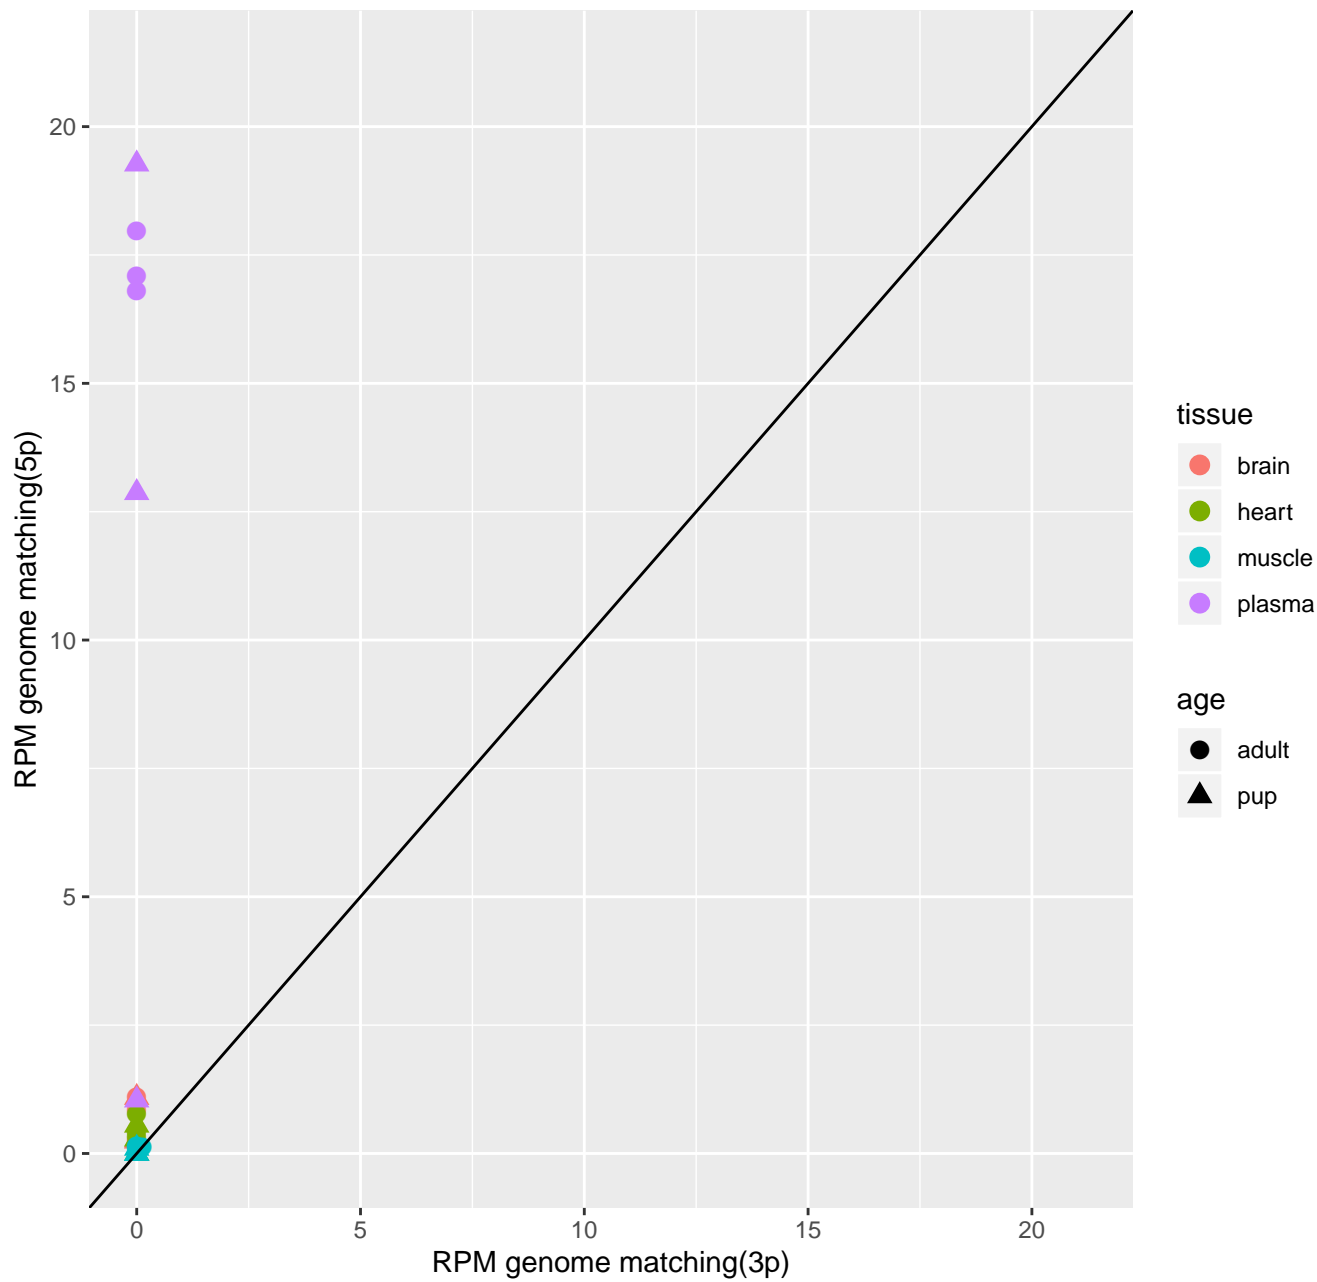

## lwe-miR-365a\_loc1

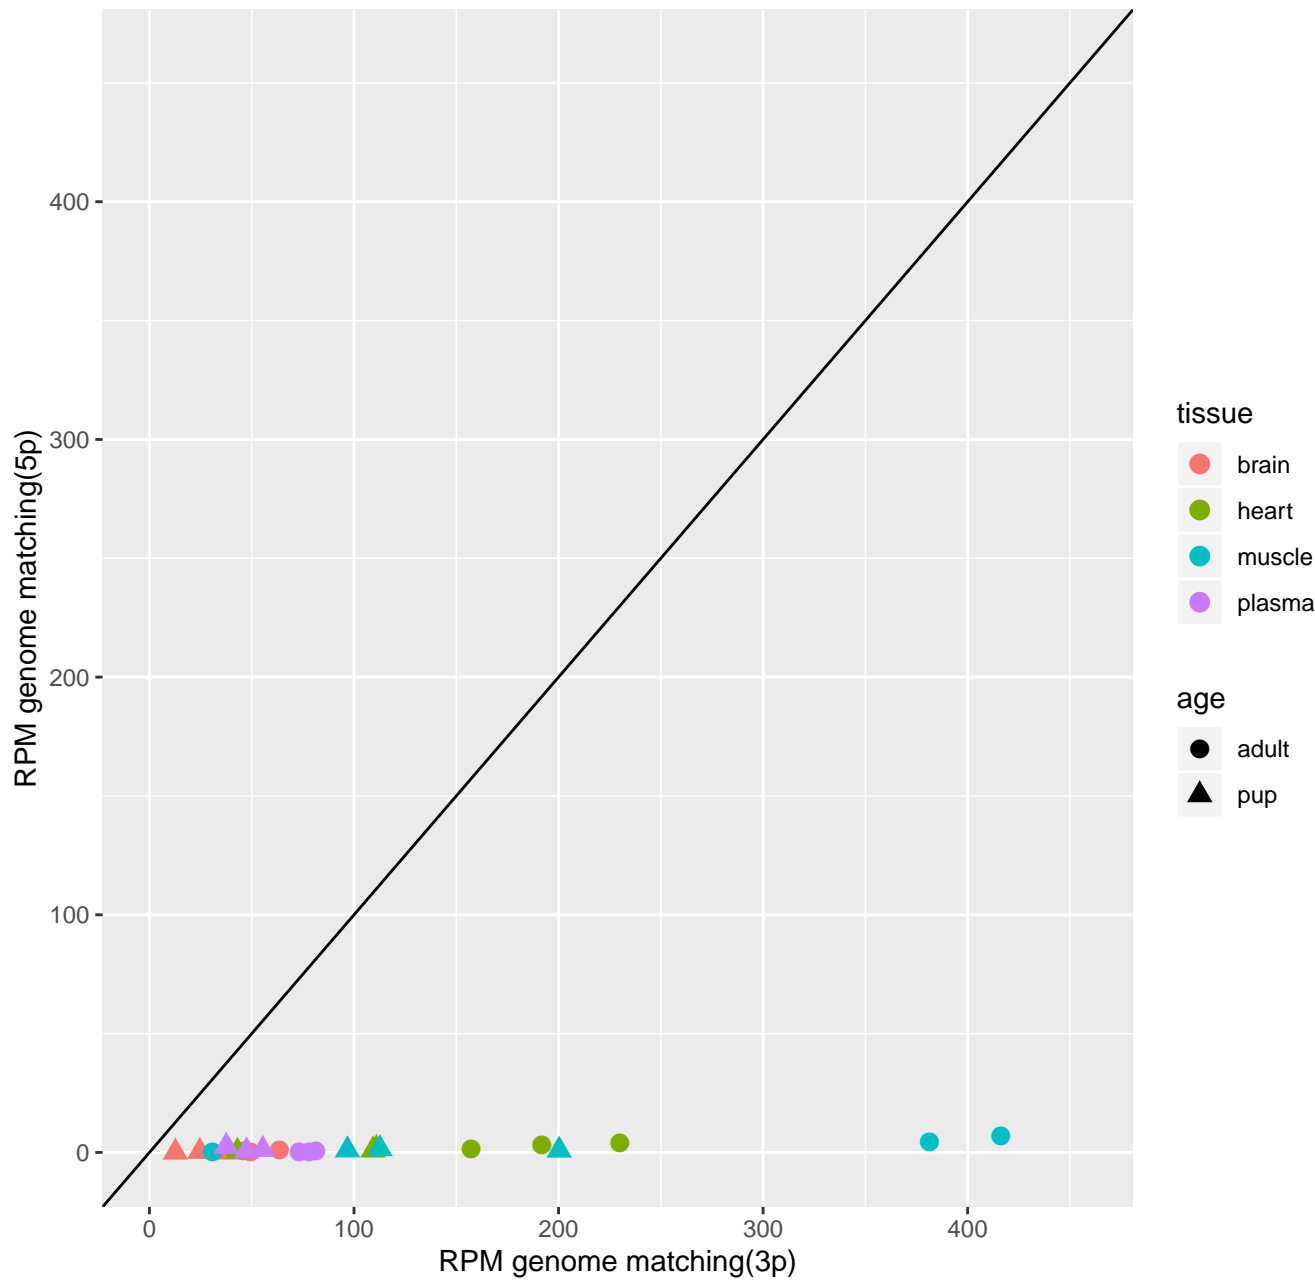

## lwe-miR-196\_loc1

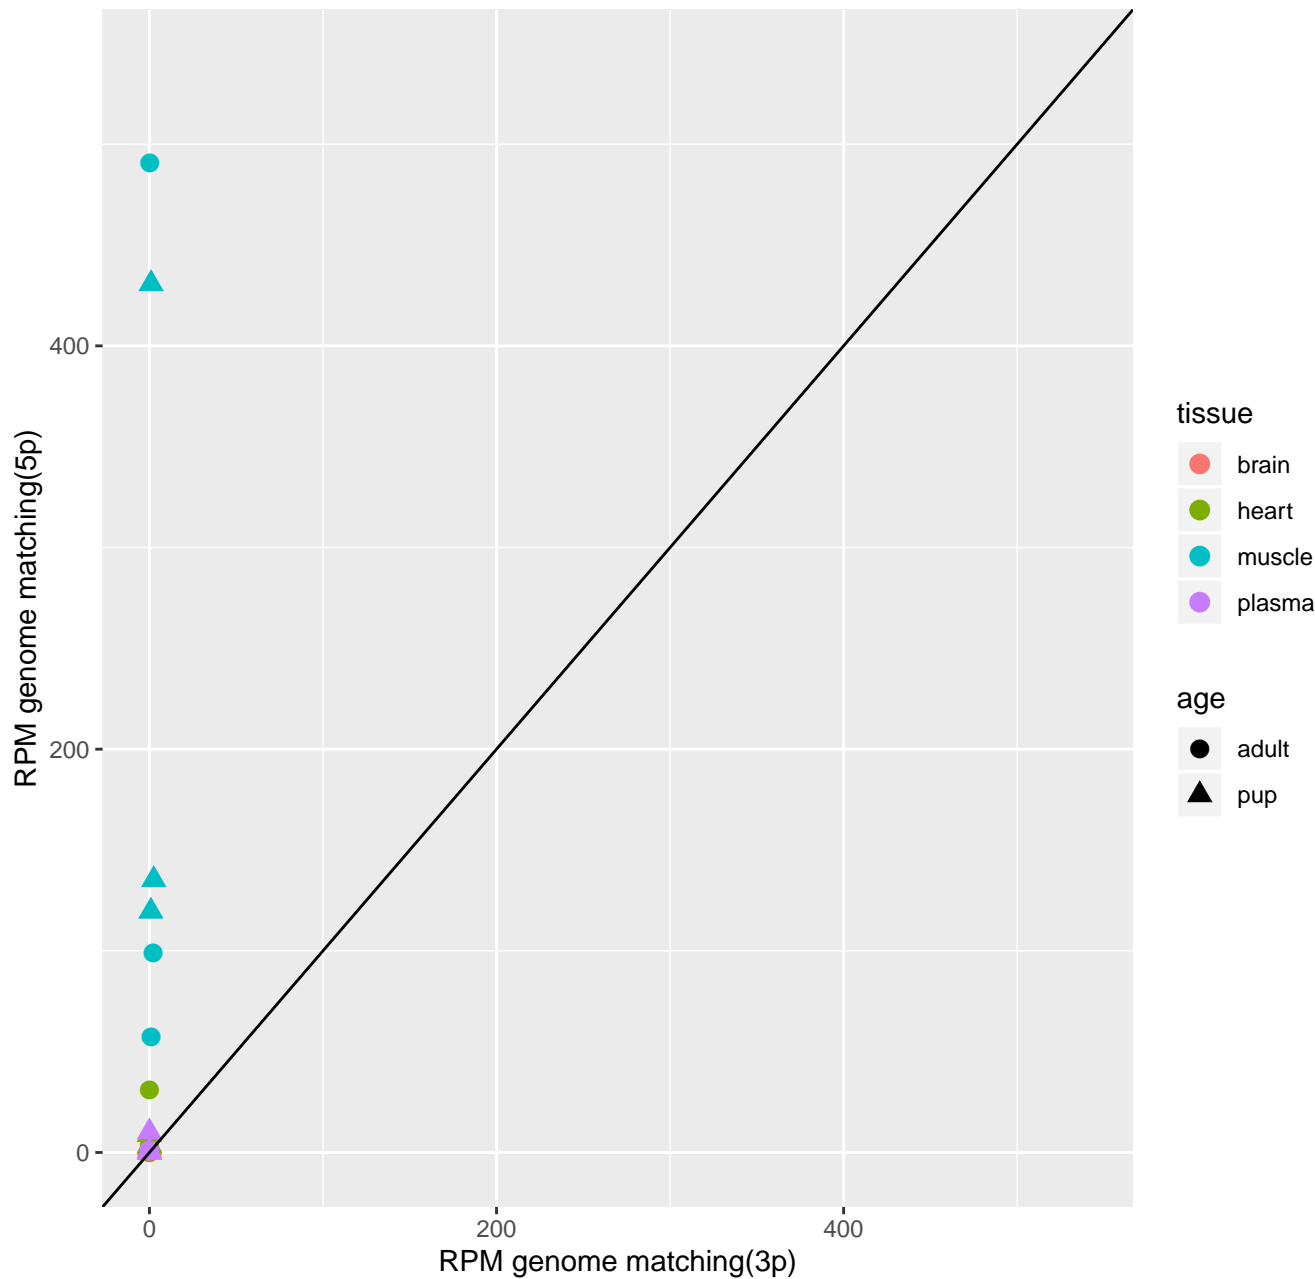

## lwe-miR-148b\_loc1

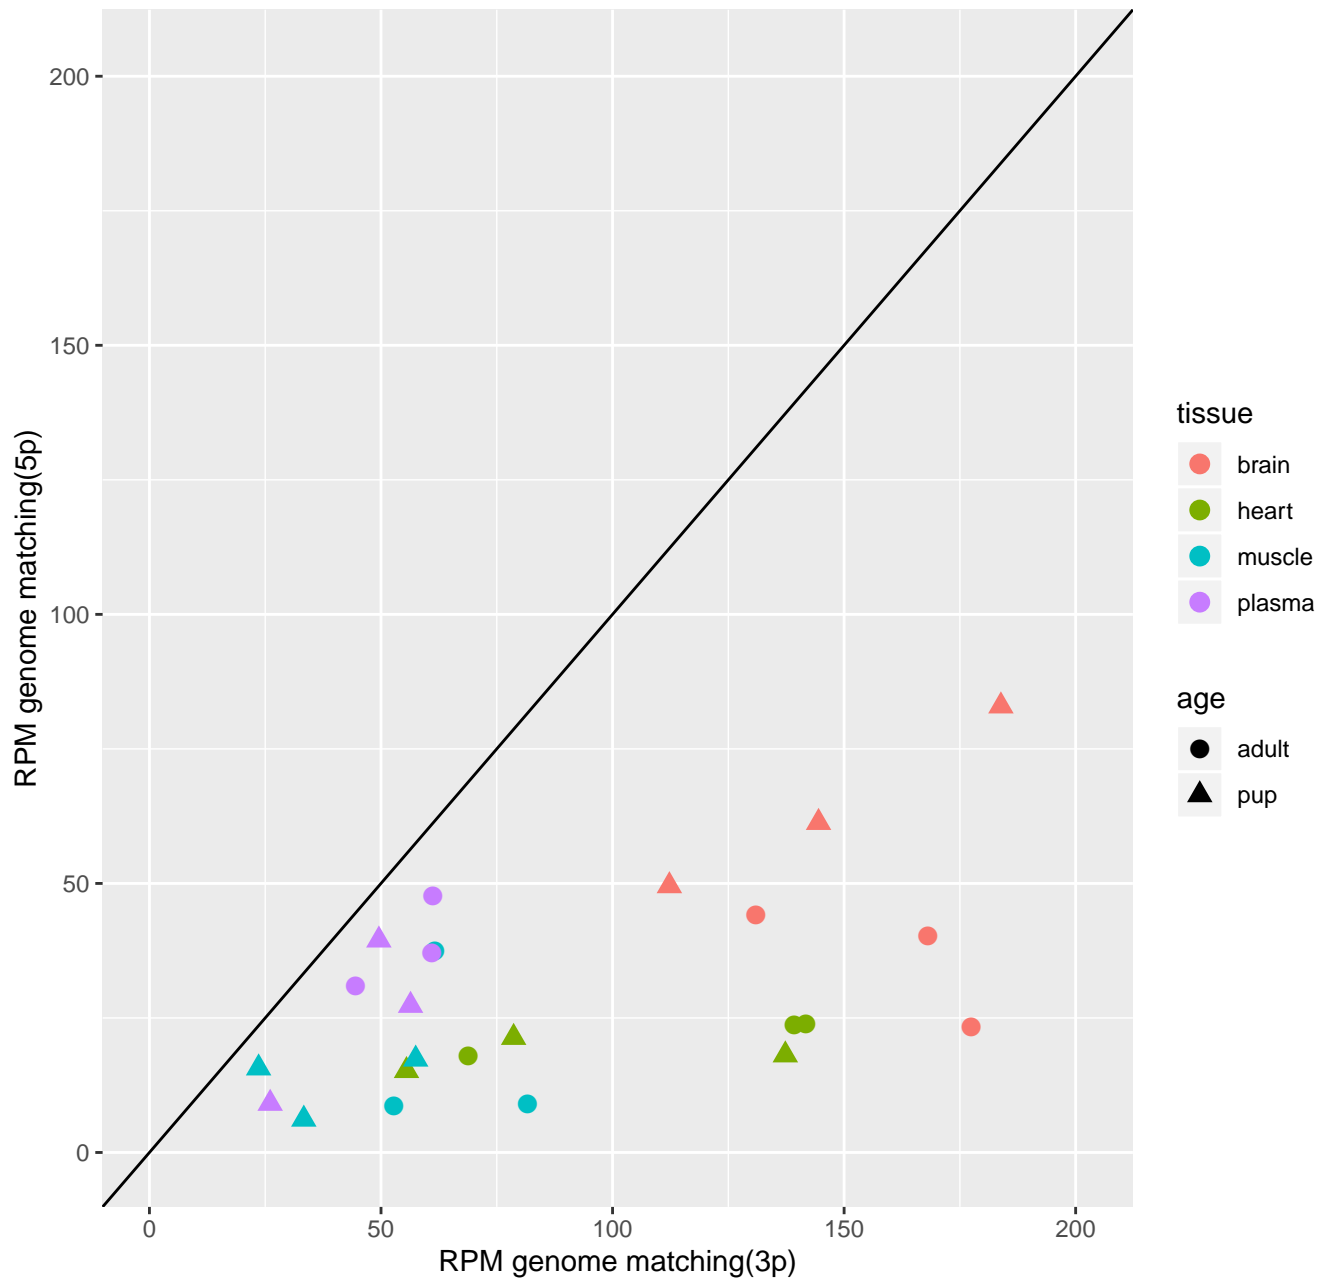



## lwe-miR-129a\_loc1

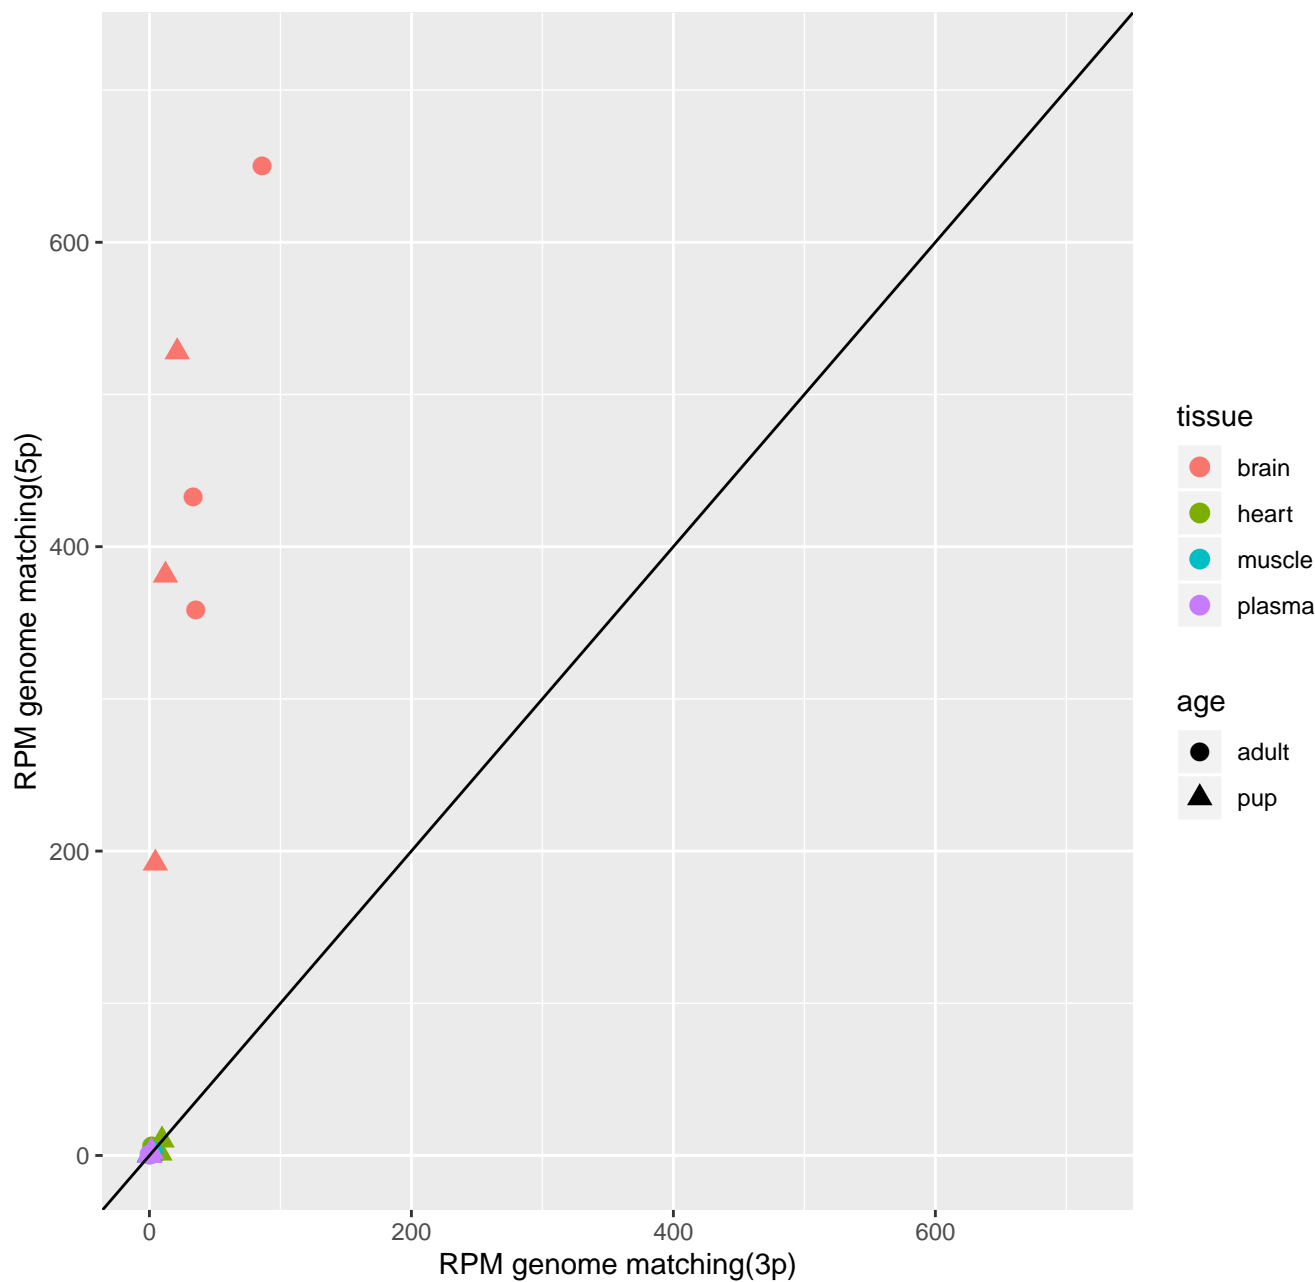

novel\_4

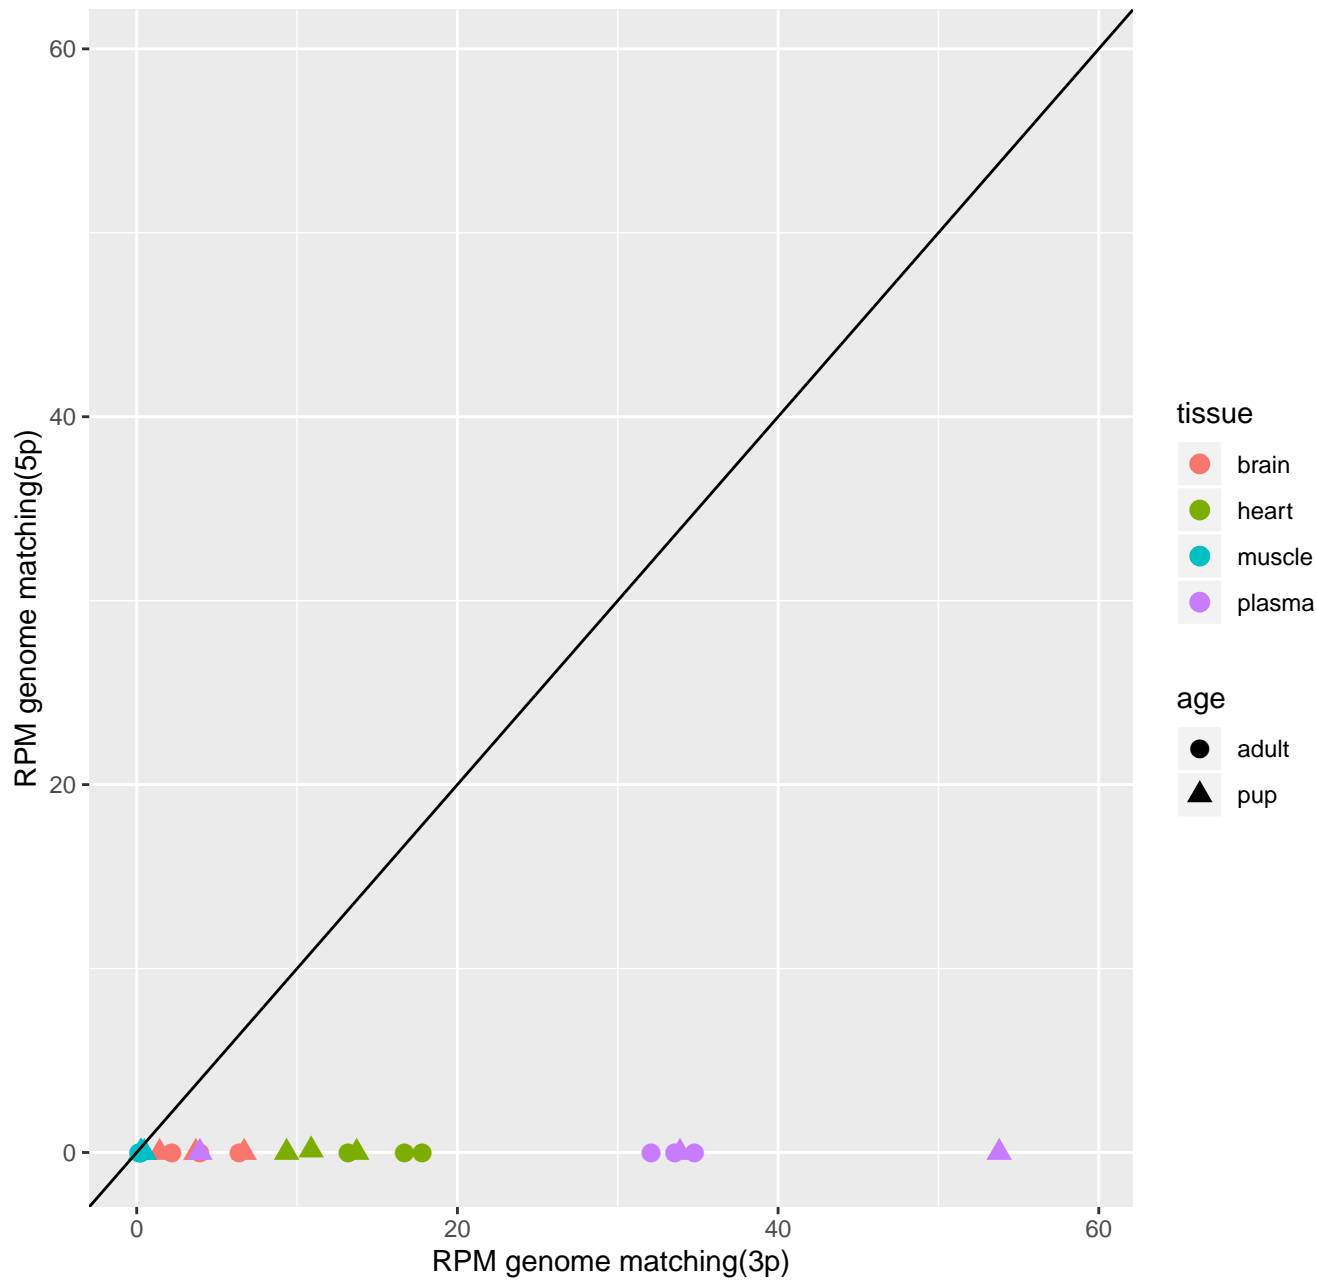

## lwe-miR-29a\_loc1

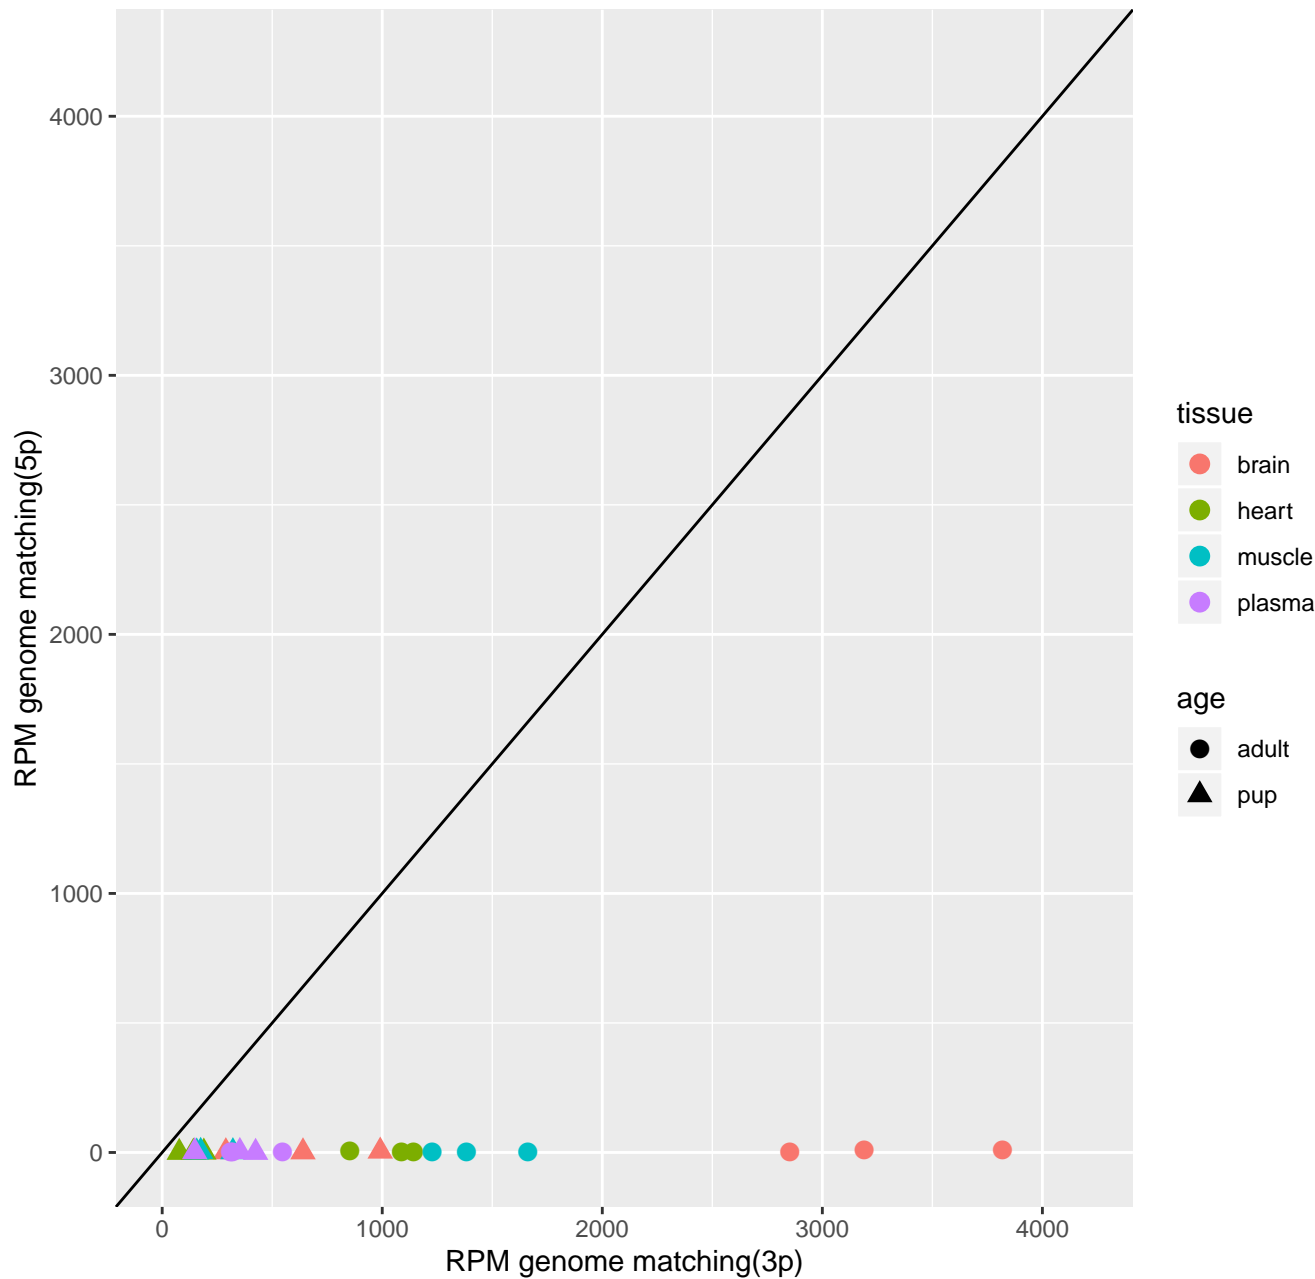

# lwe-miR-29b\_loc1

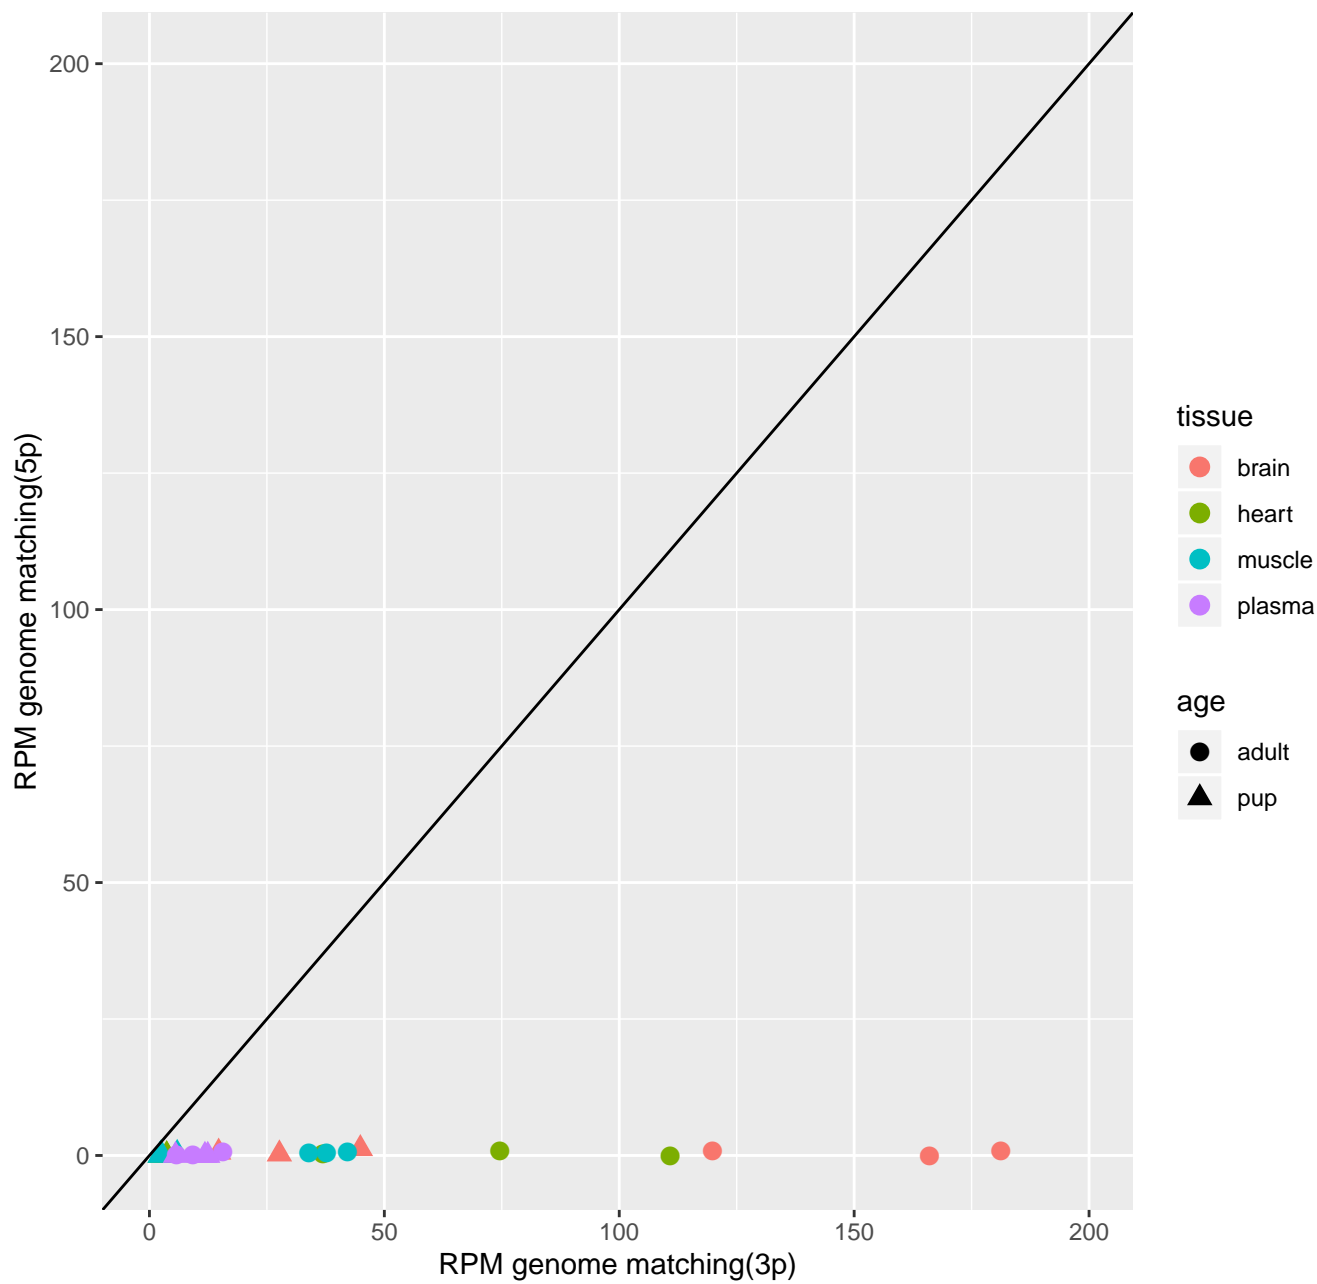

novel\_5

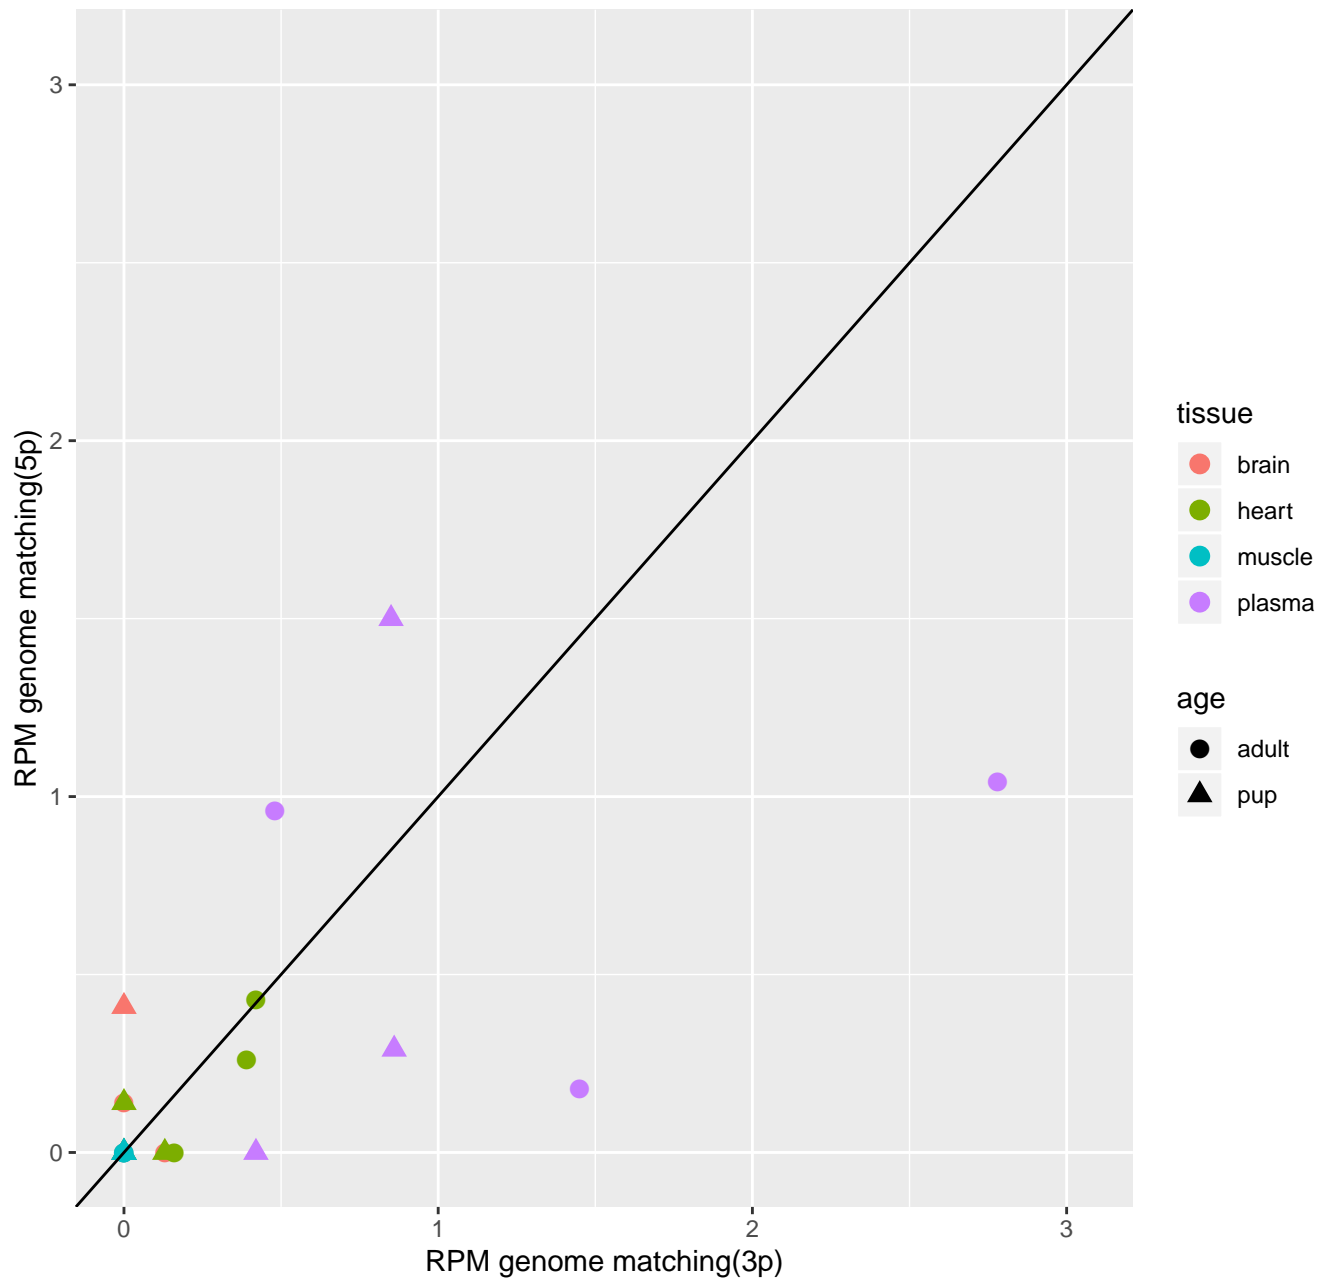

novel\_6

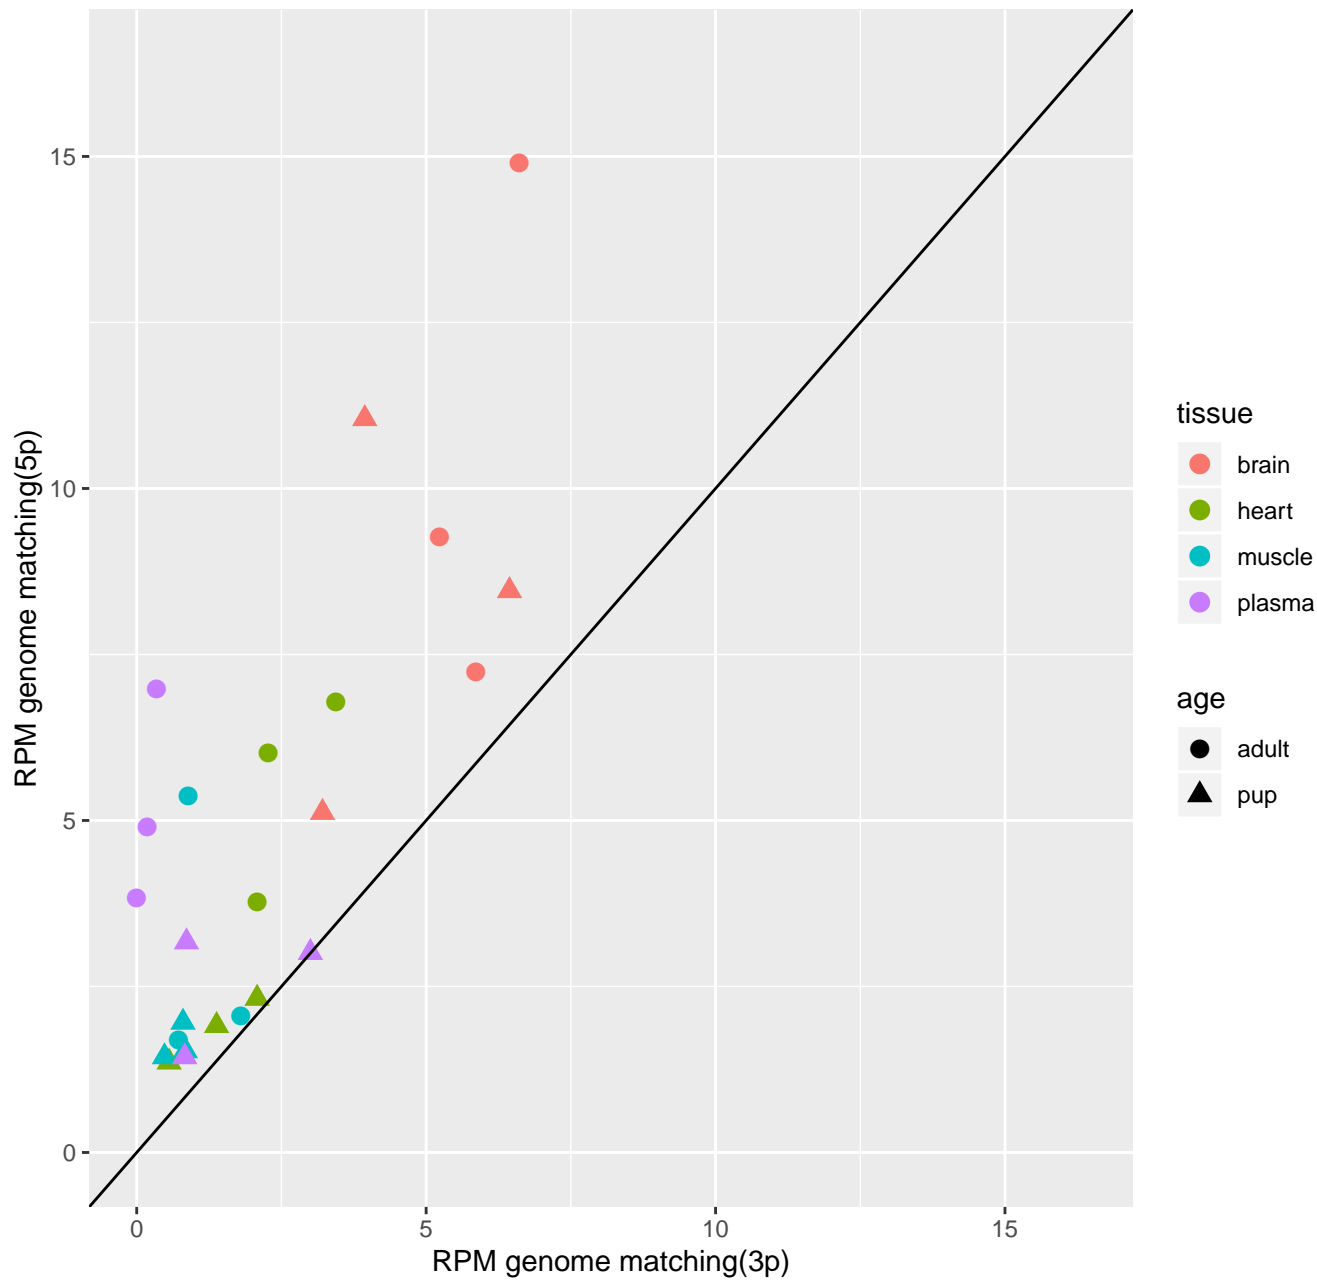



## lwe-miR-181a\_loc1

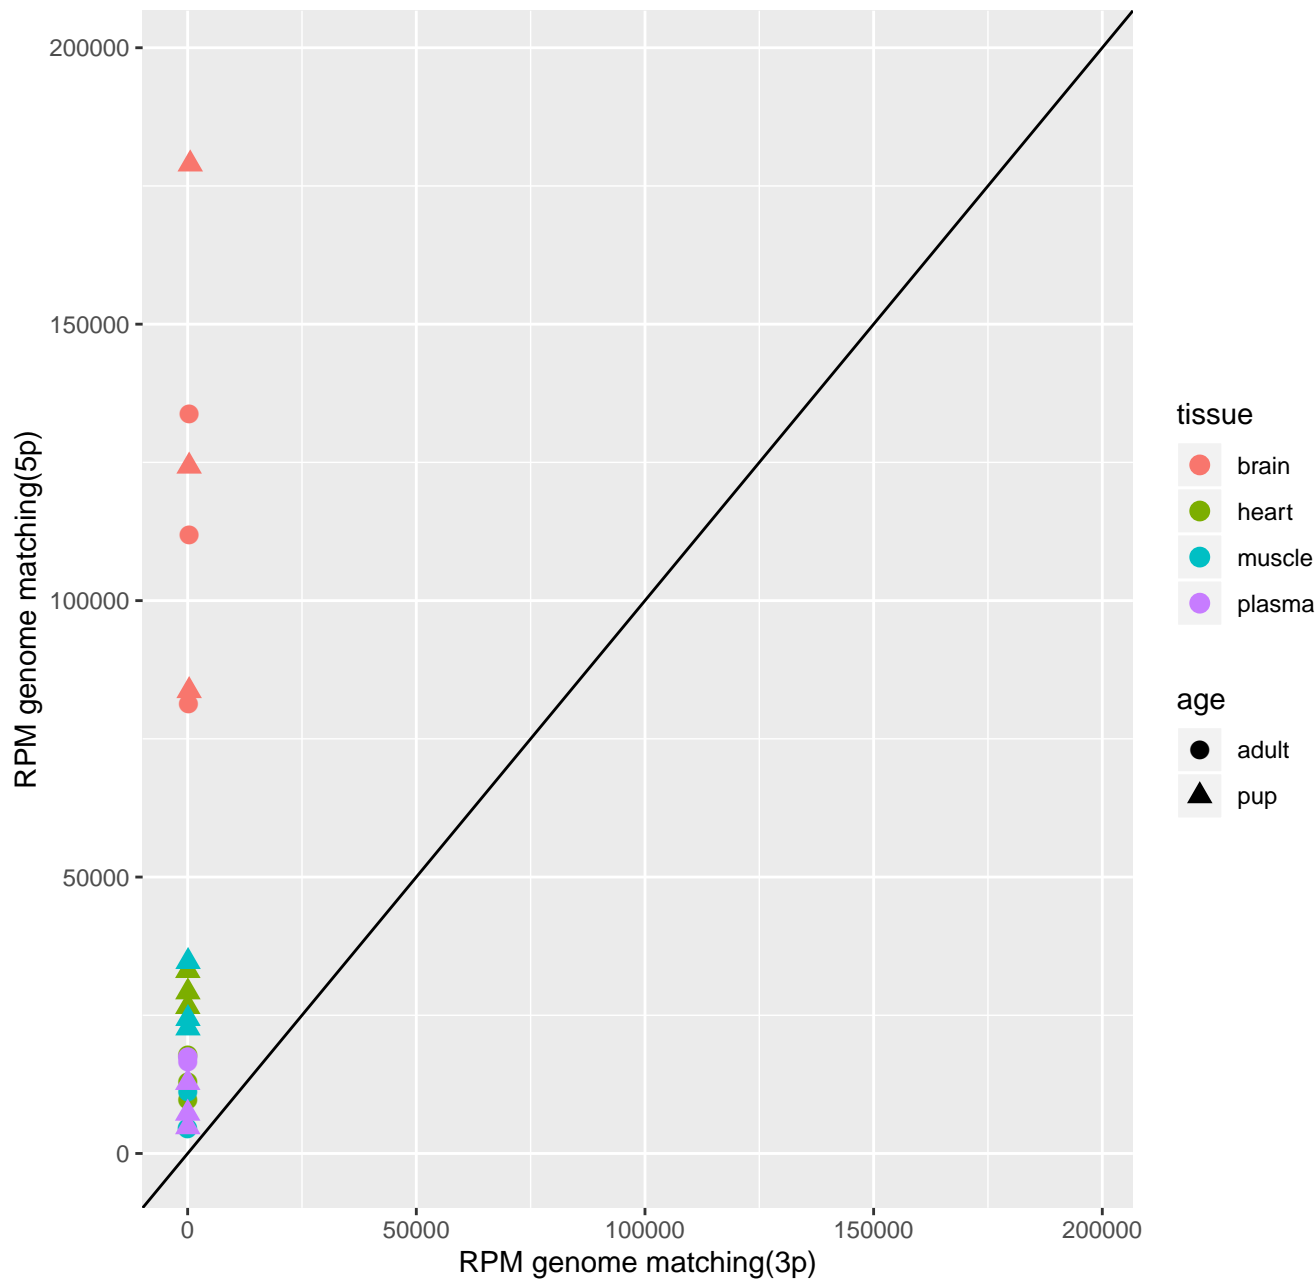





novel\_7

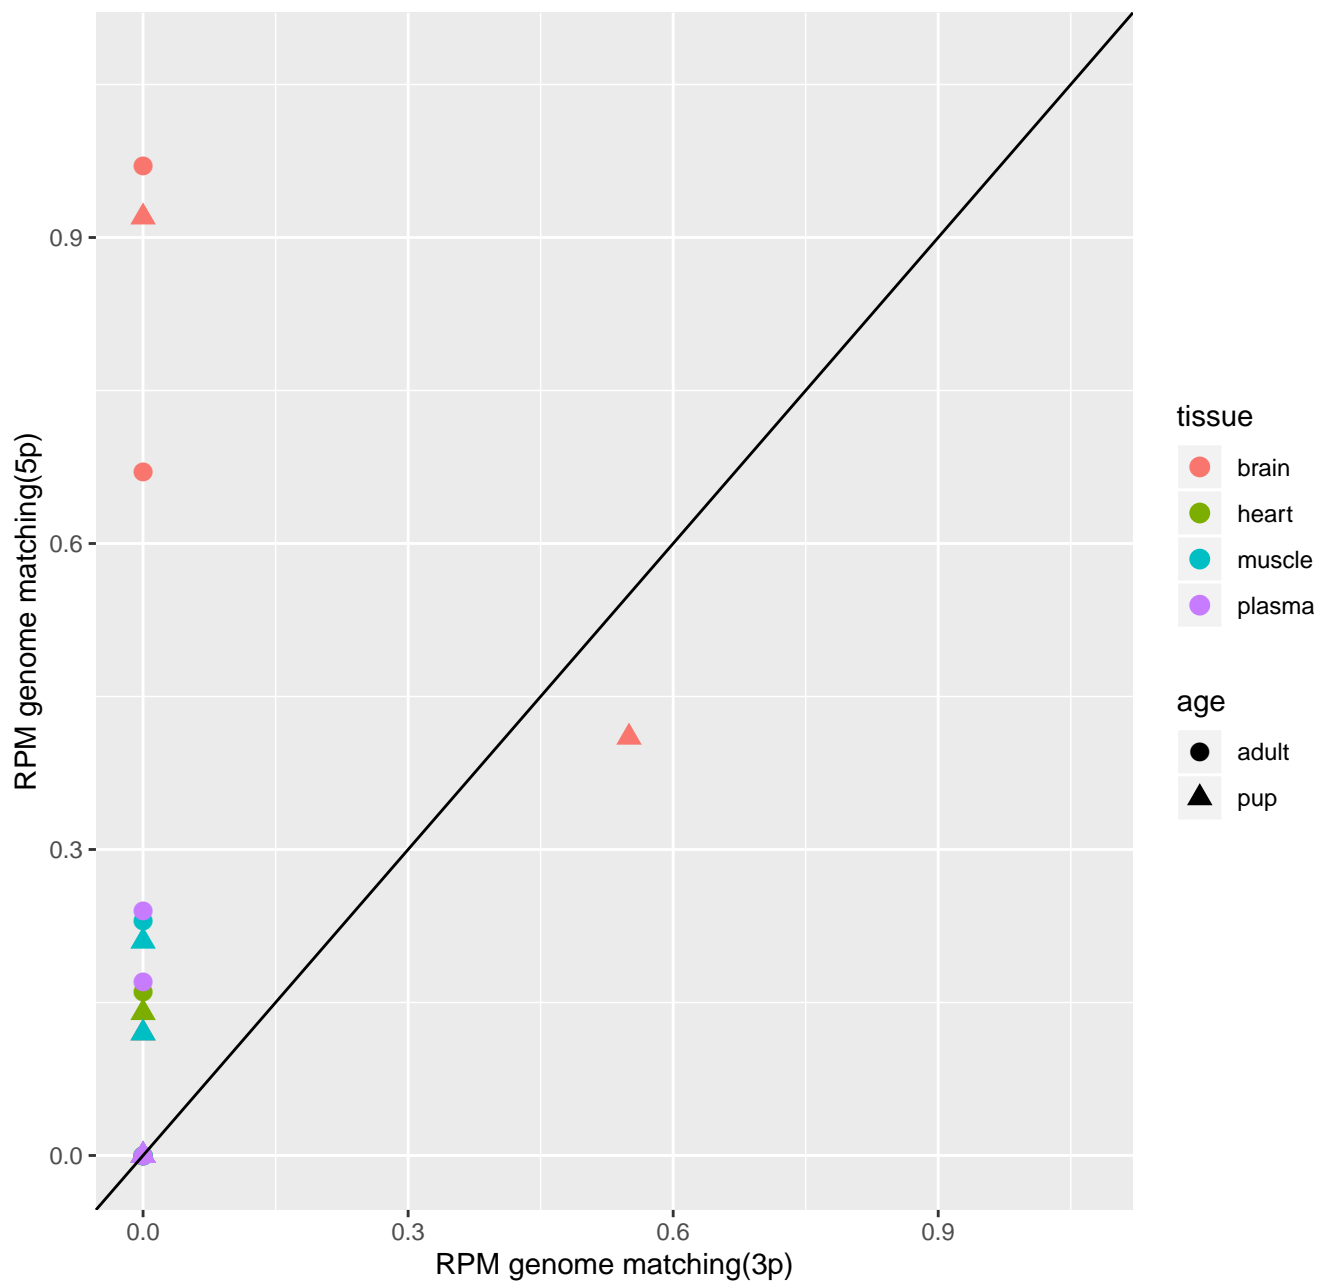

# lwe-miR-128a\_loc1

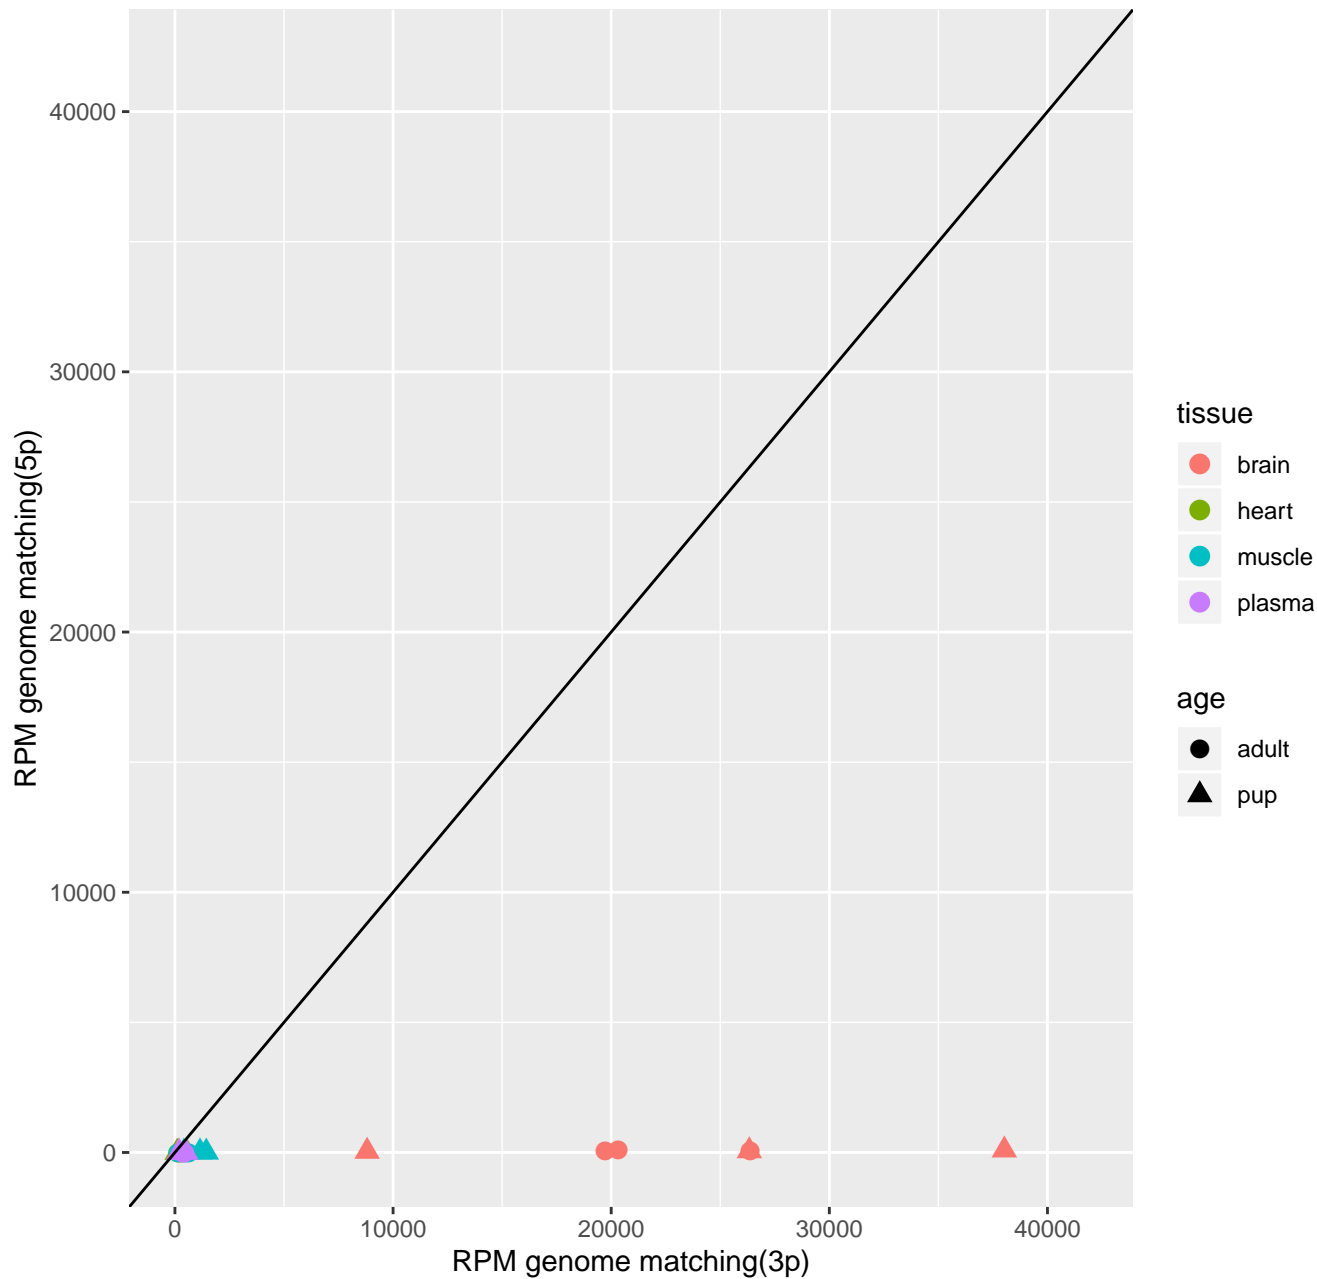

novel\_8

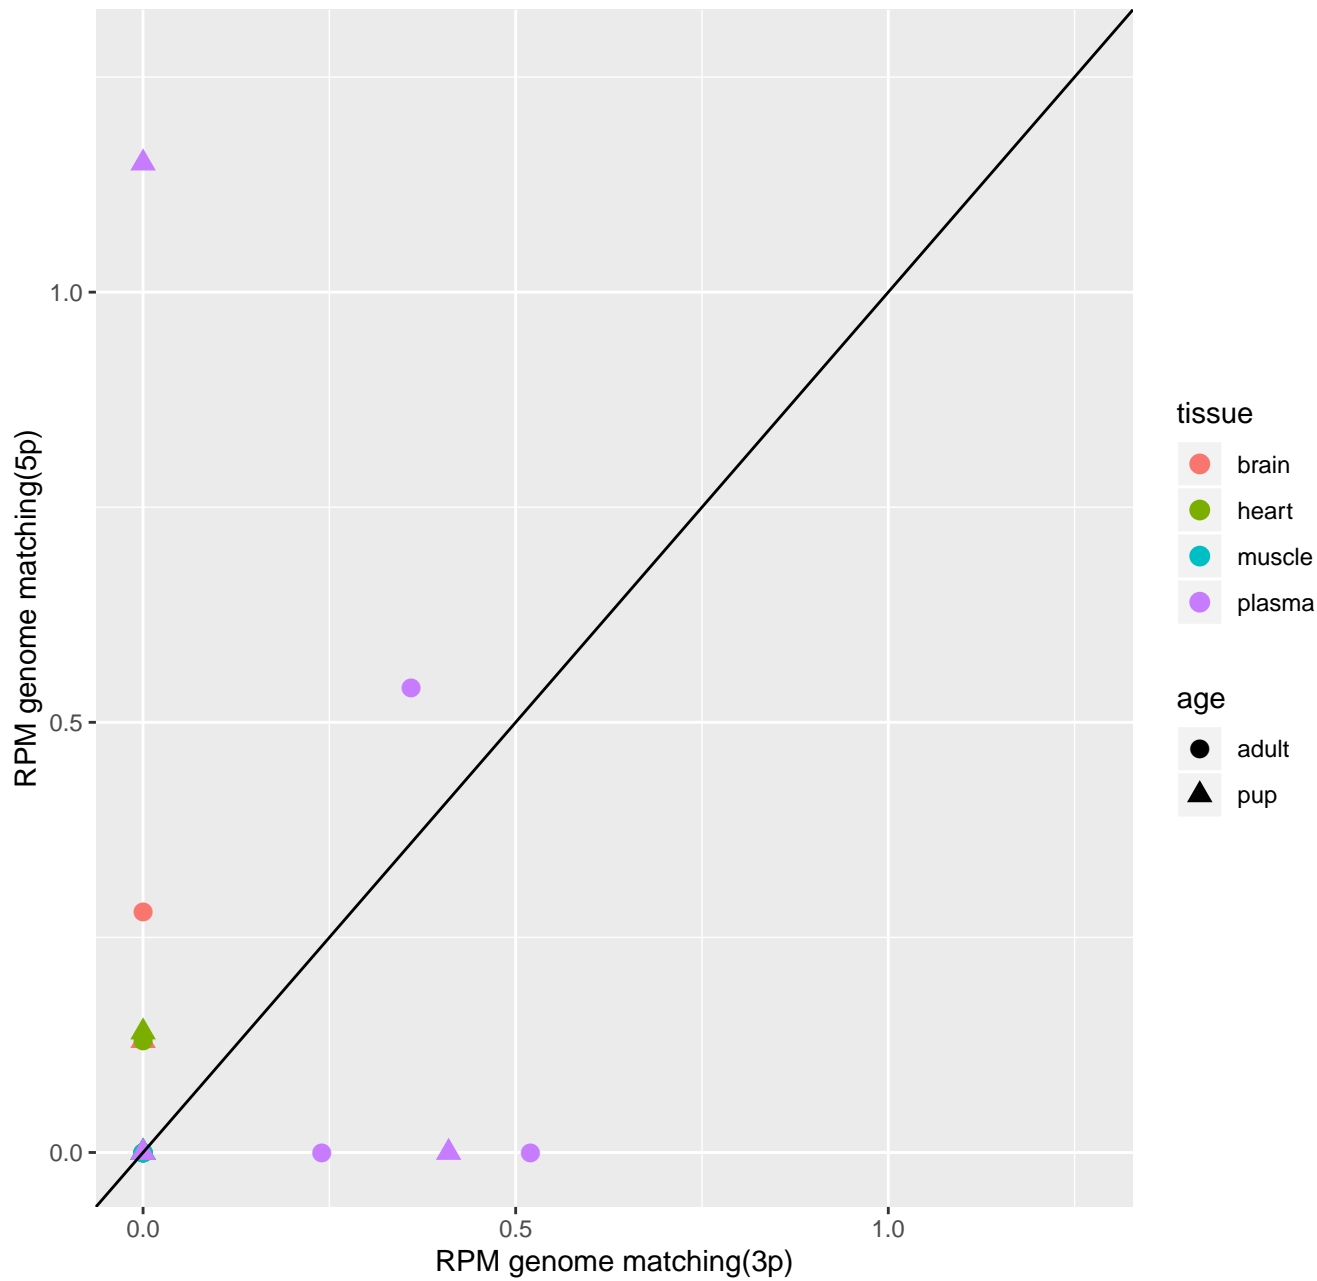

novel\_9

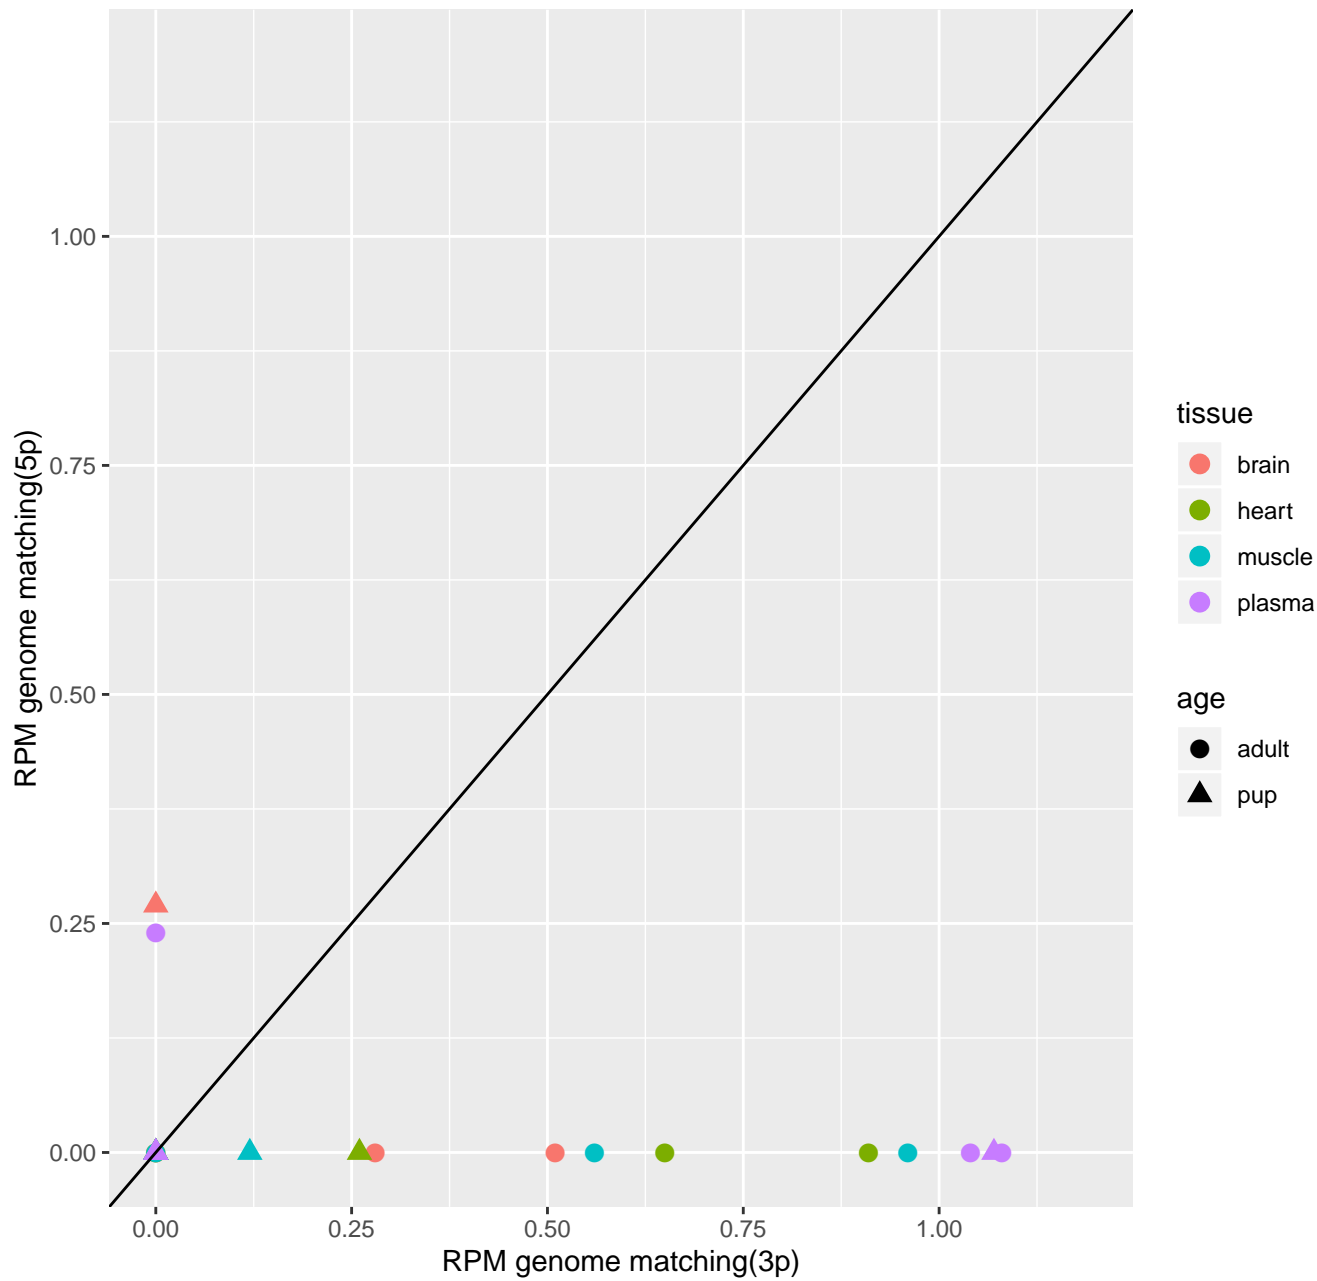

novel\_10

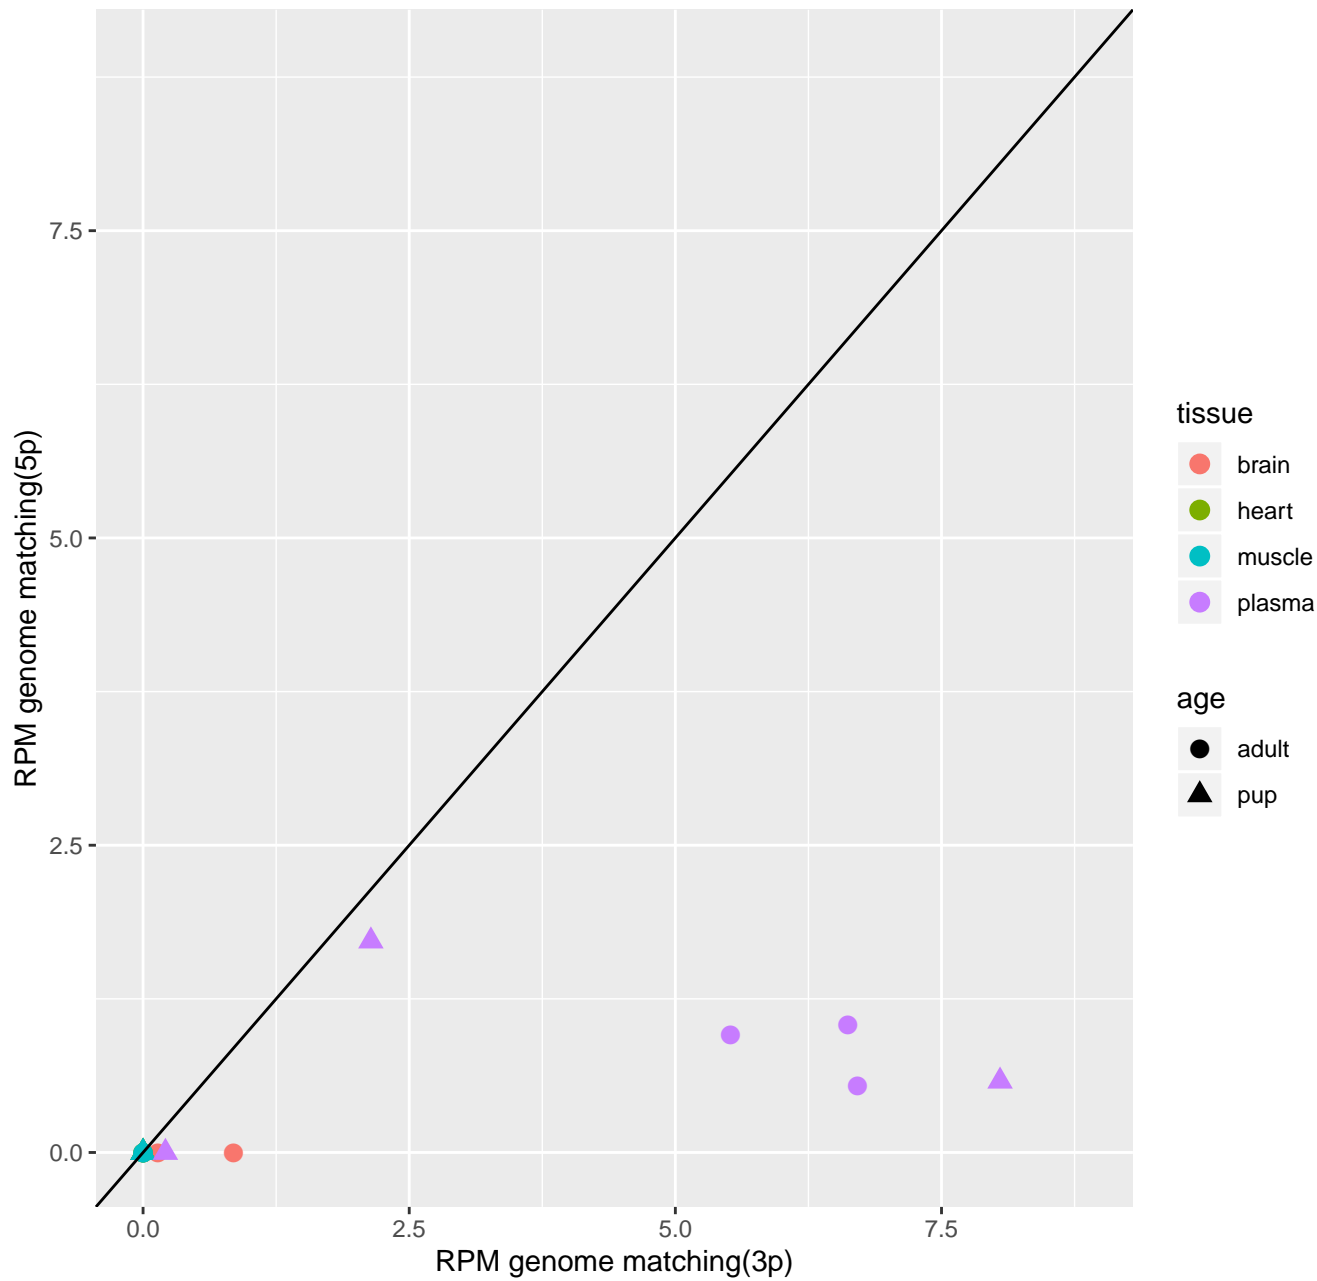

## novel\_11

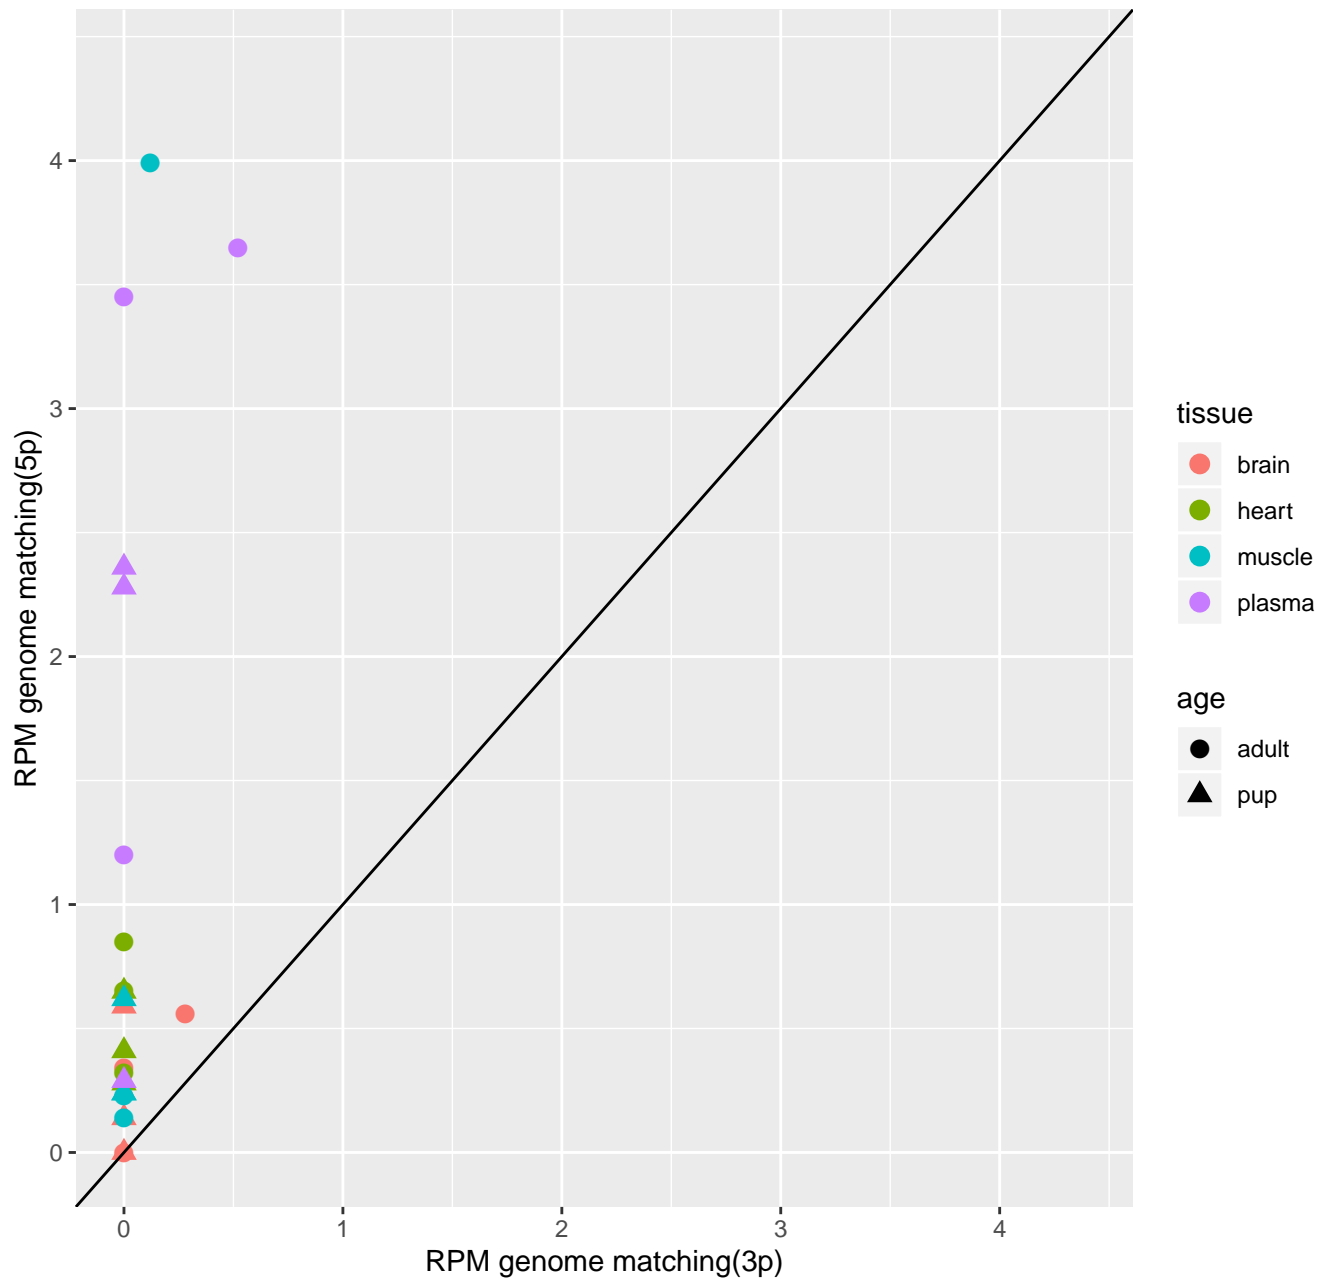

## novel\_12

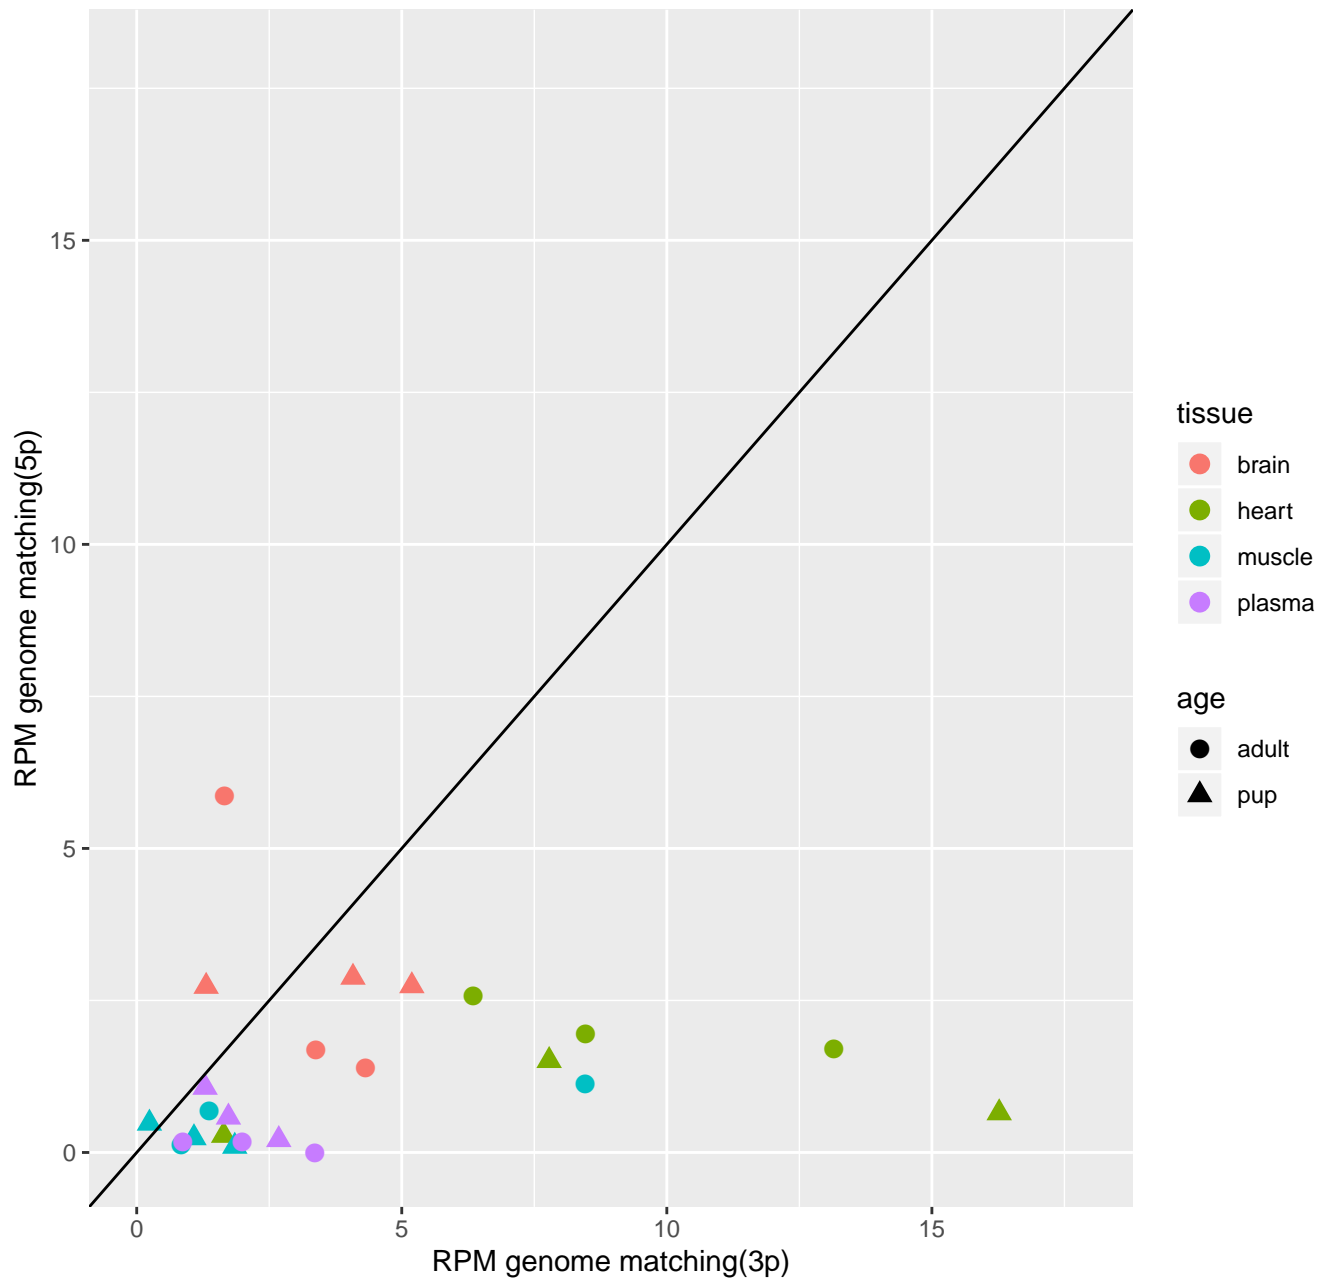



## lwe-miR-599\_loc1

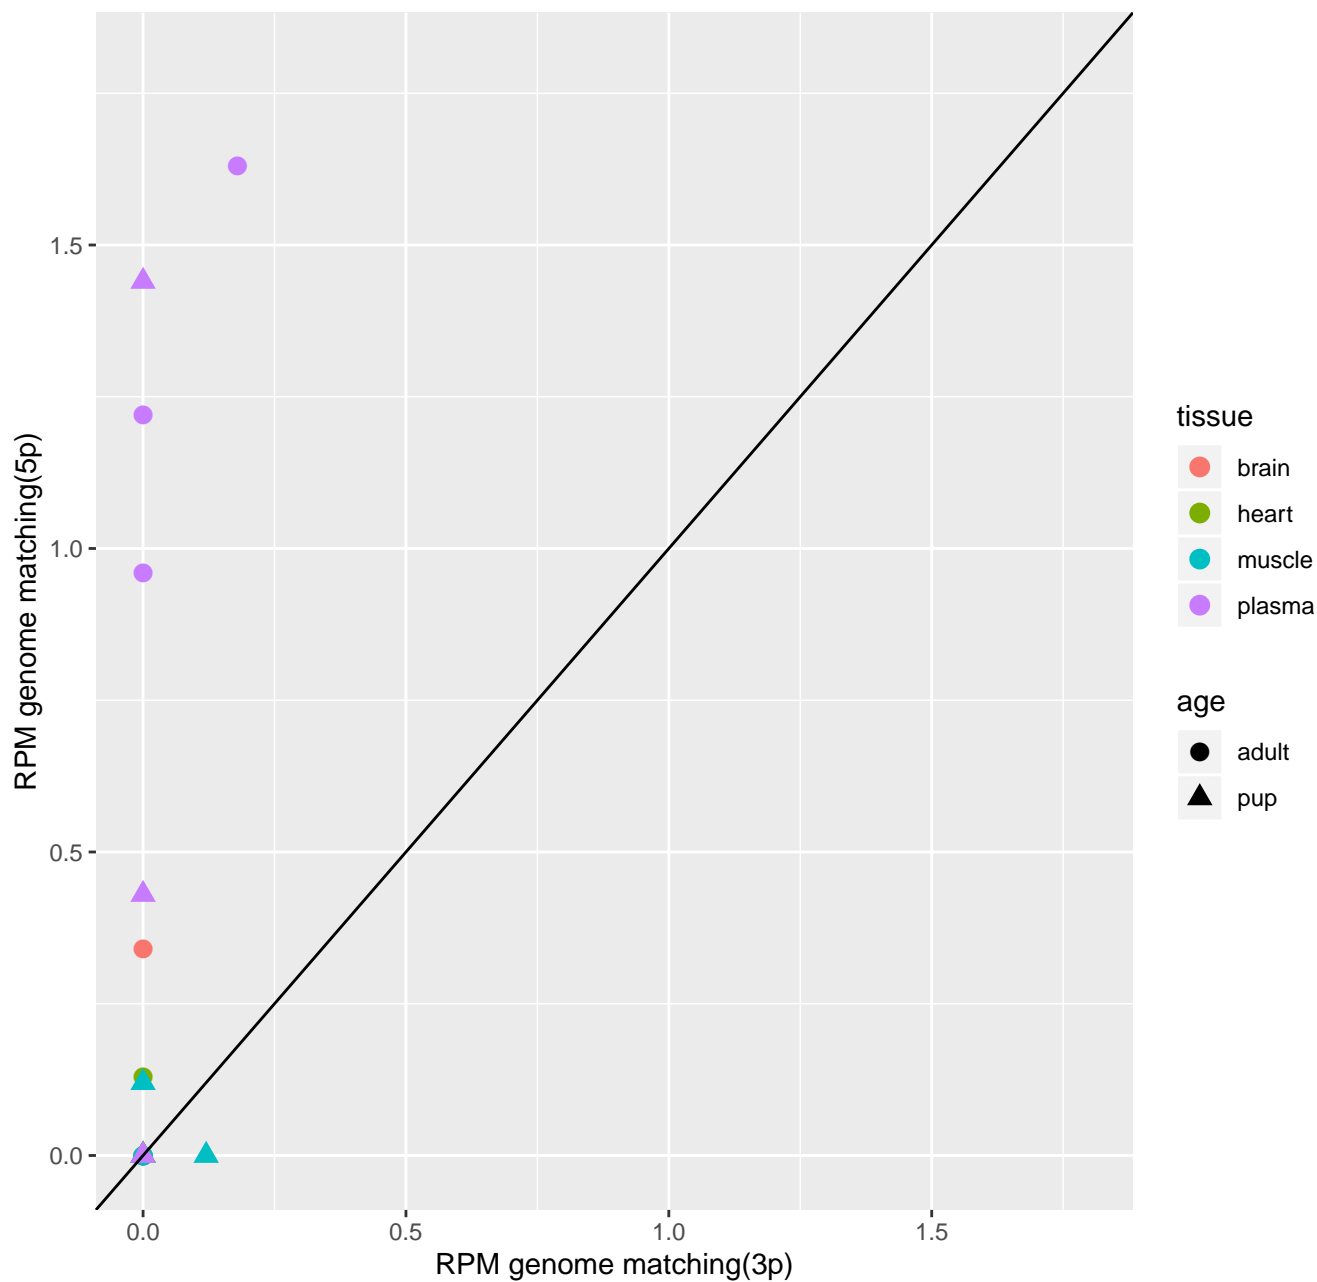

# lwe-miR-29e\_loc1

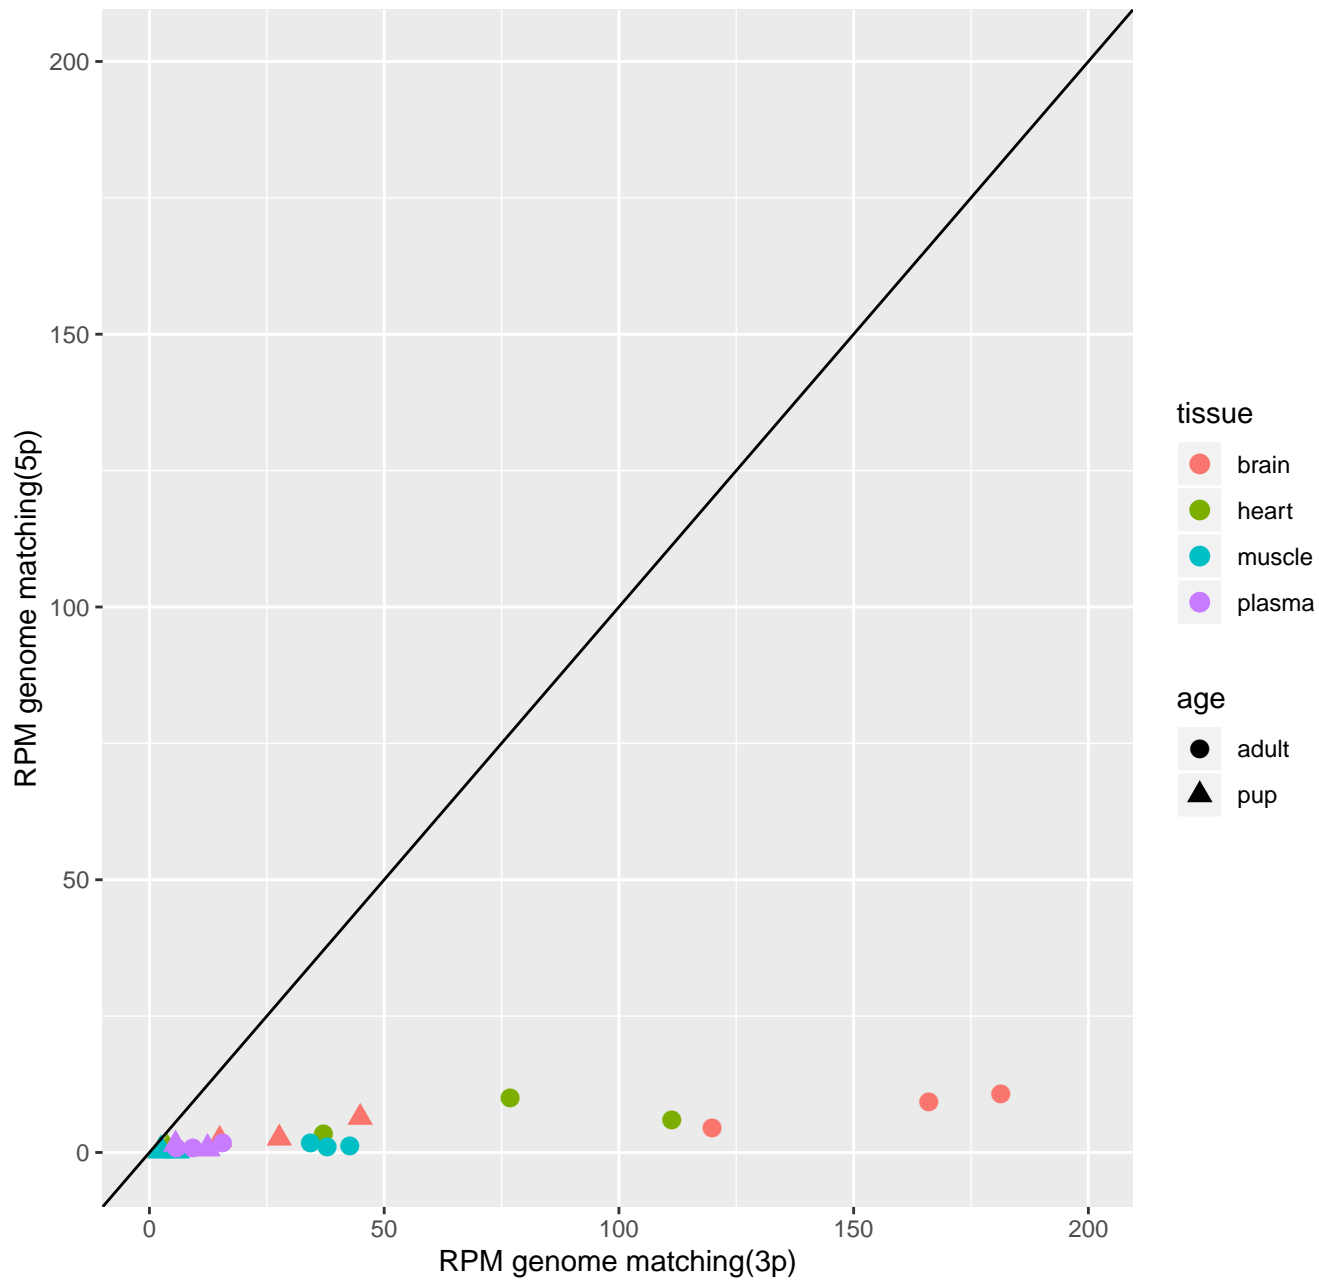

## lwe-miR-29c-1\_loc1

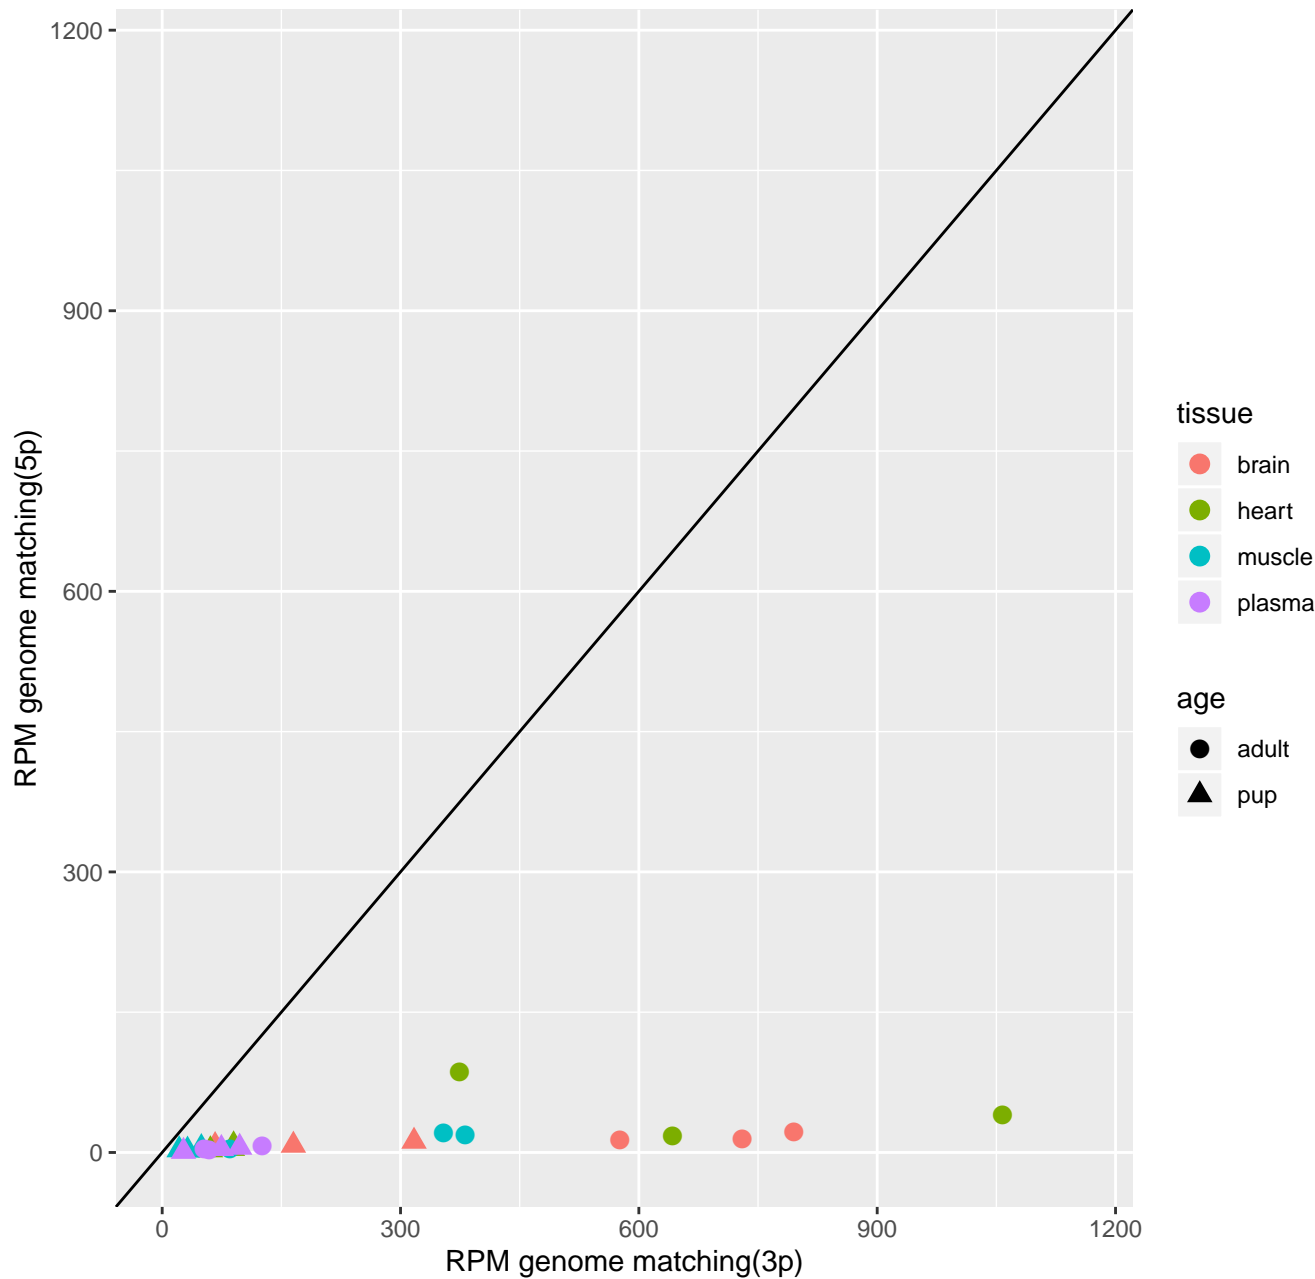

## novel\_13

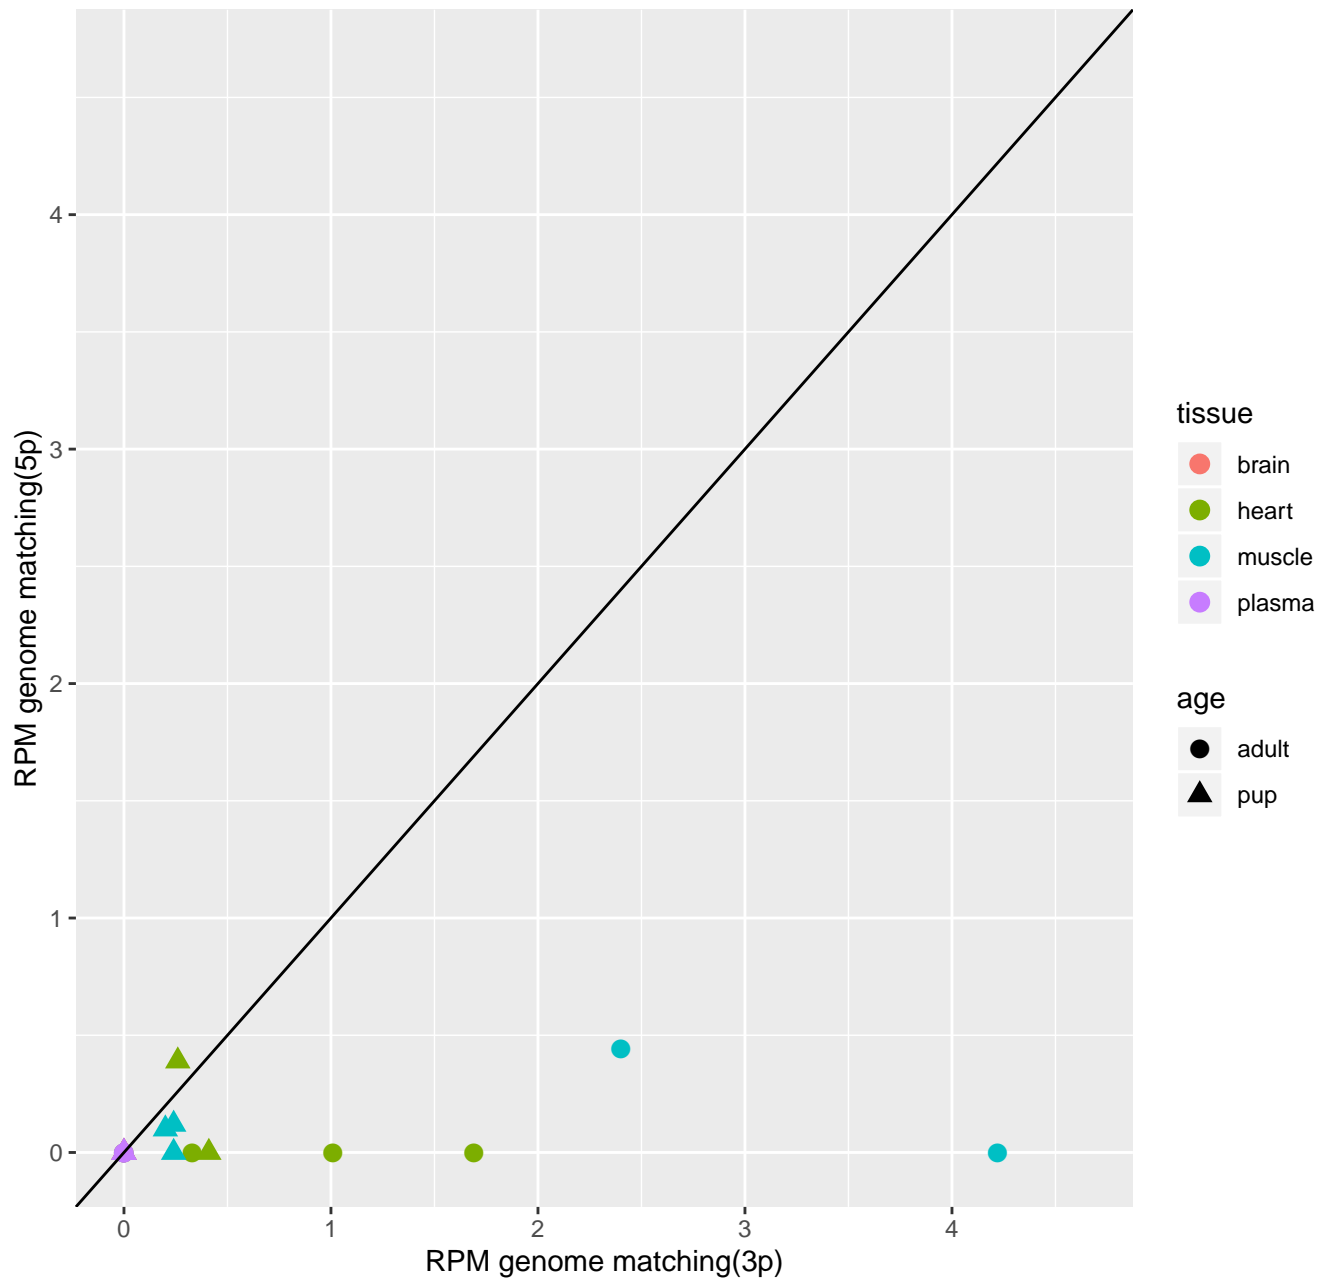

## lwe-miR-139\_loc1

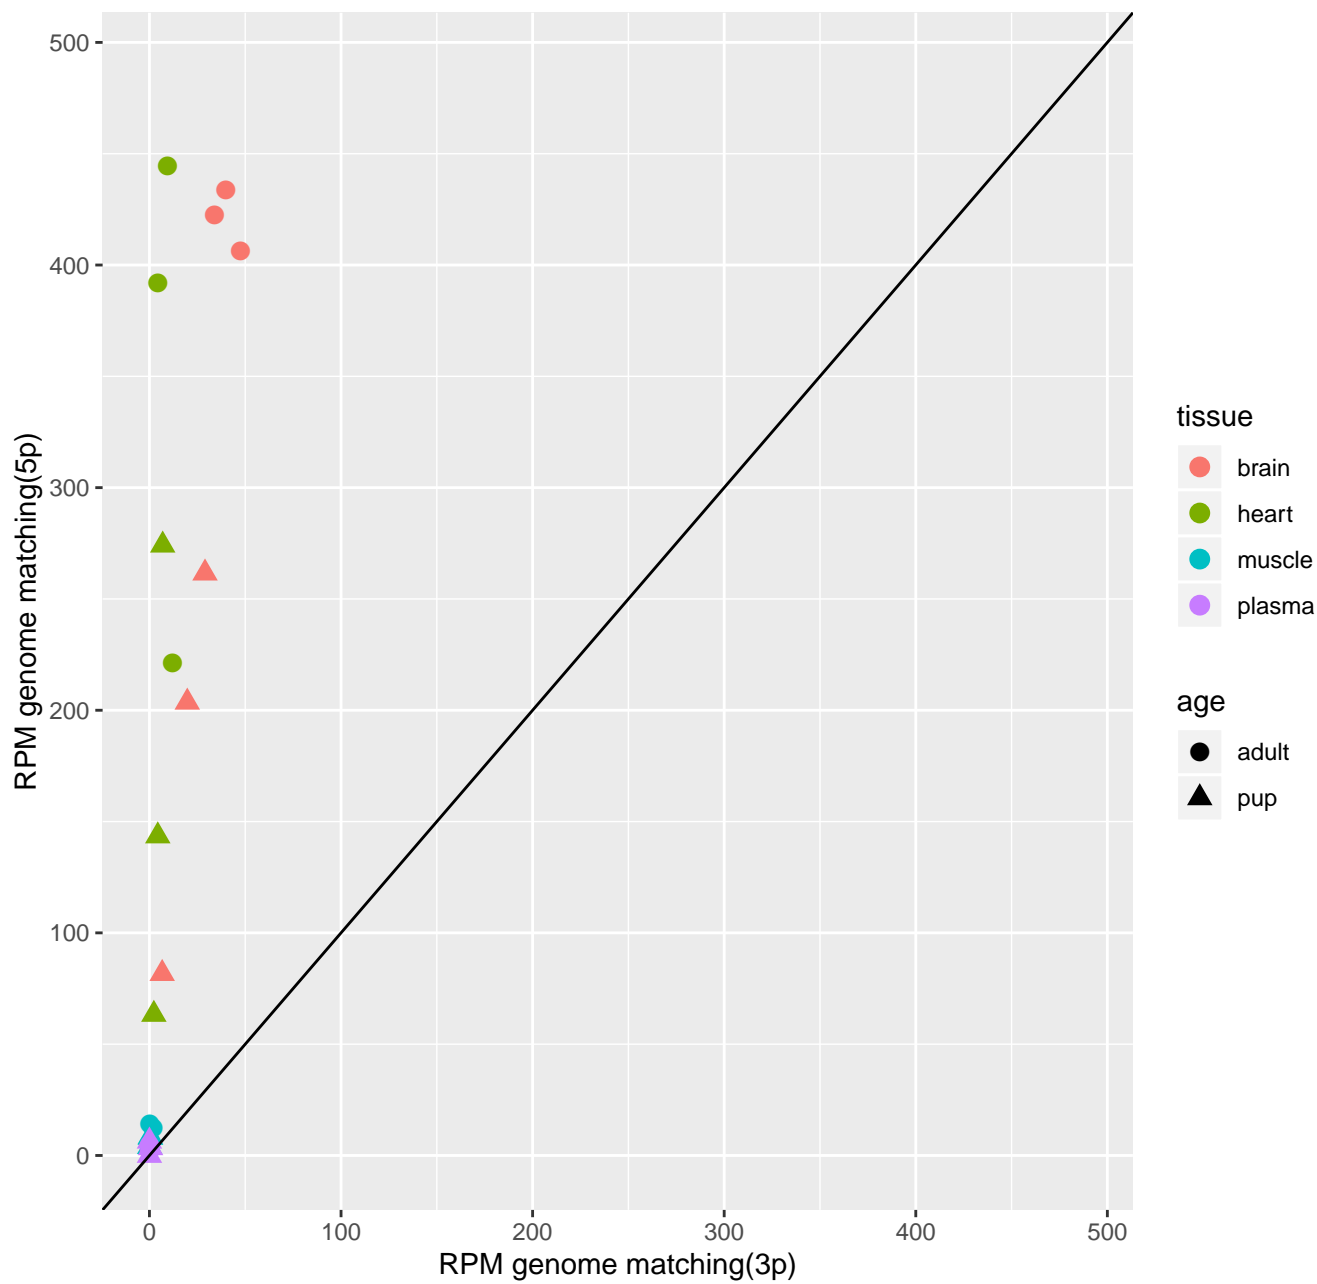



## lwe-miR-24a\_loc1

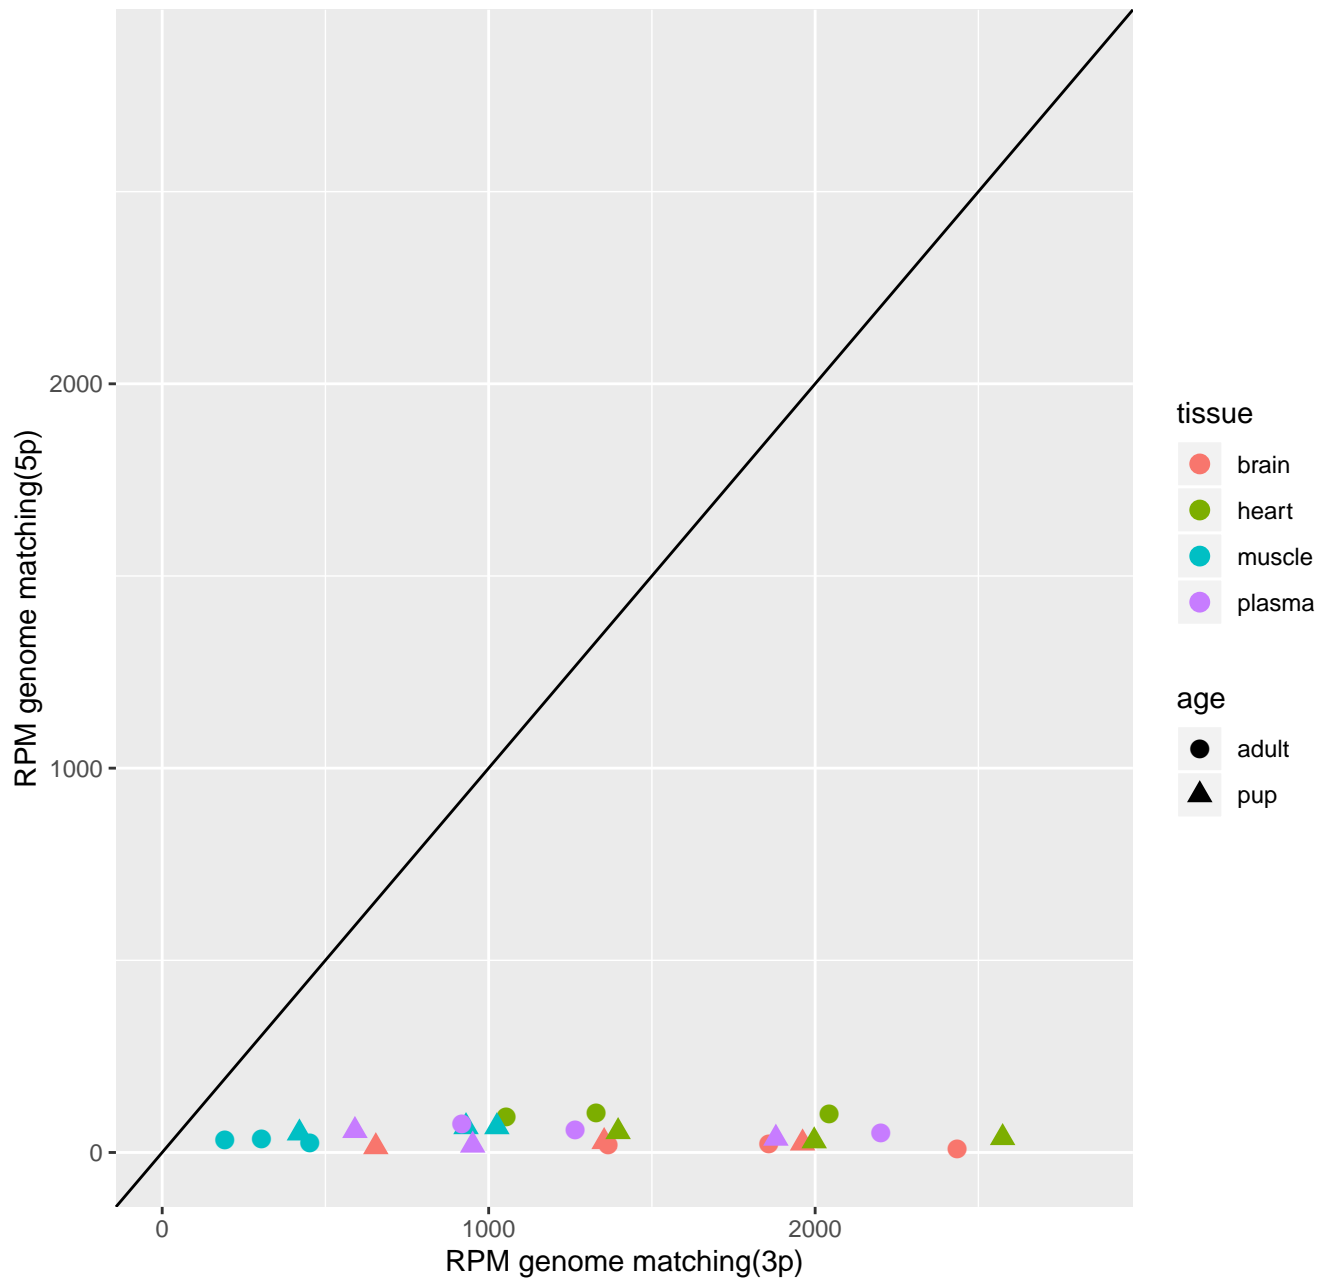

# lwe-miR-27a\_loc1

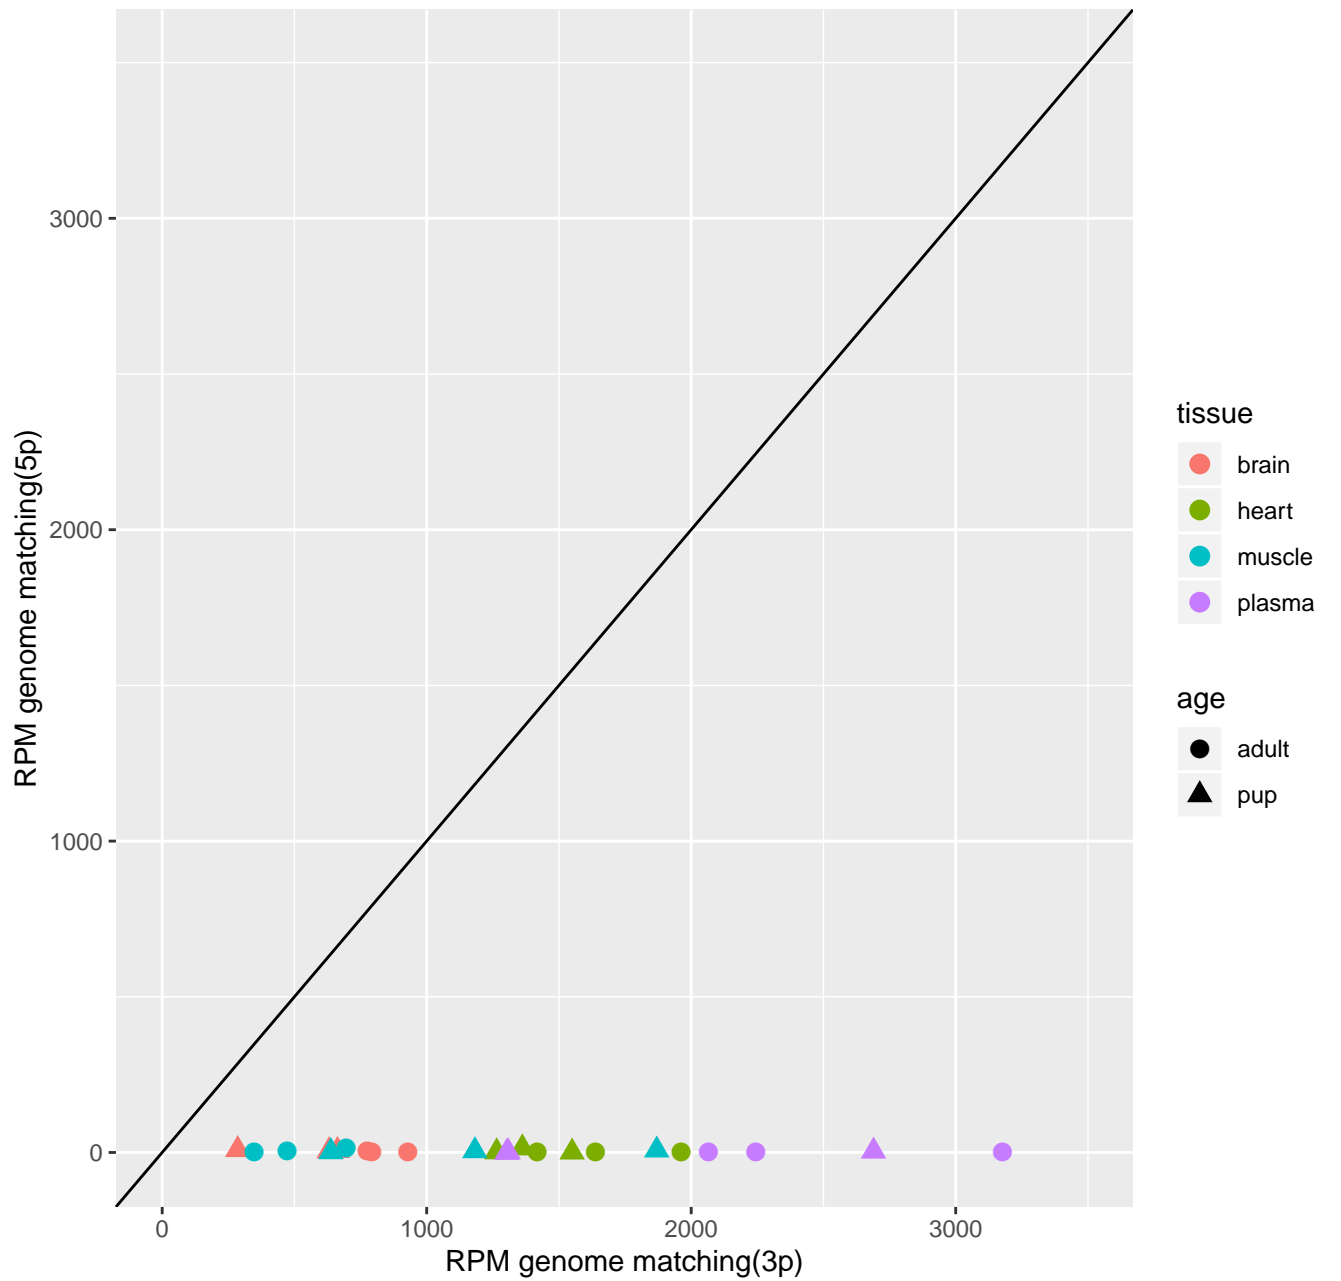



## lwe-miR-23a\_loc1

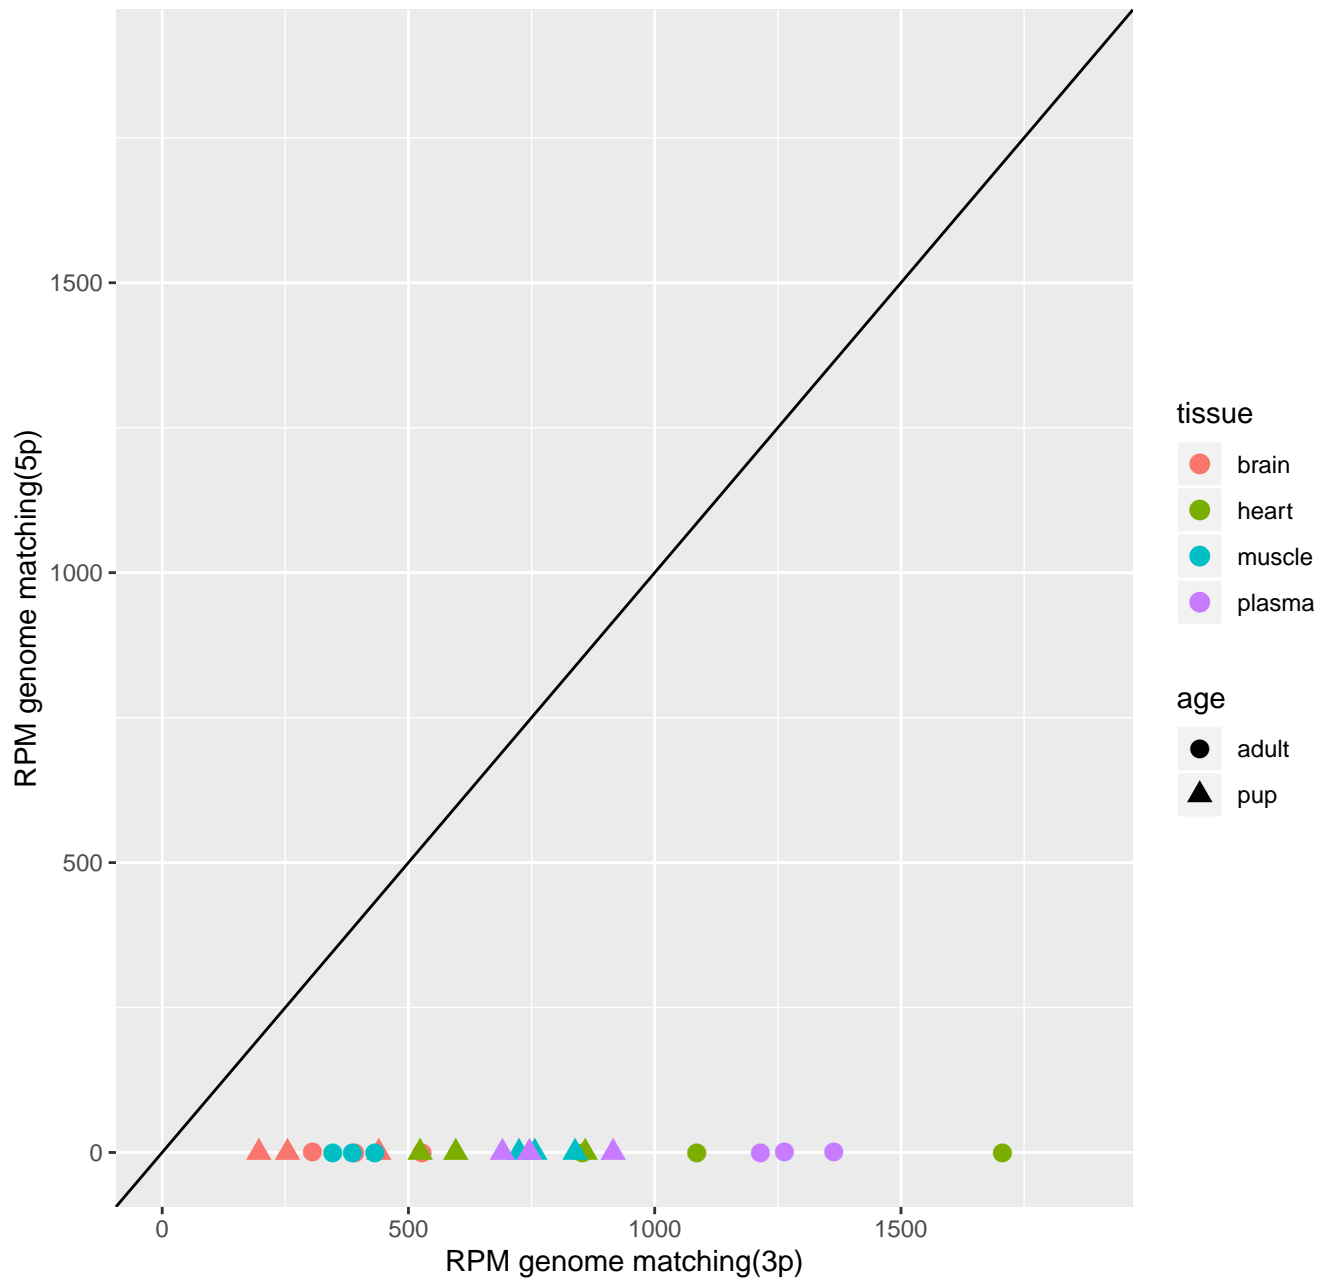

# lwe-miR-153a\_loc1

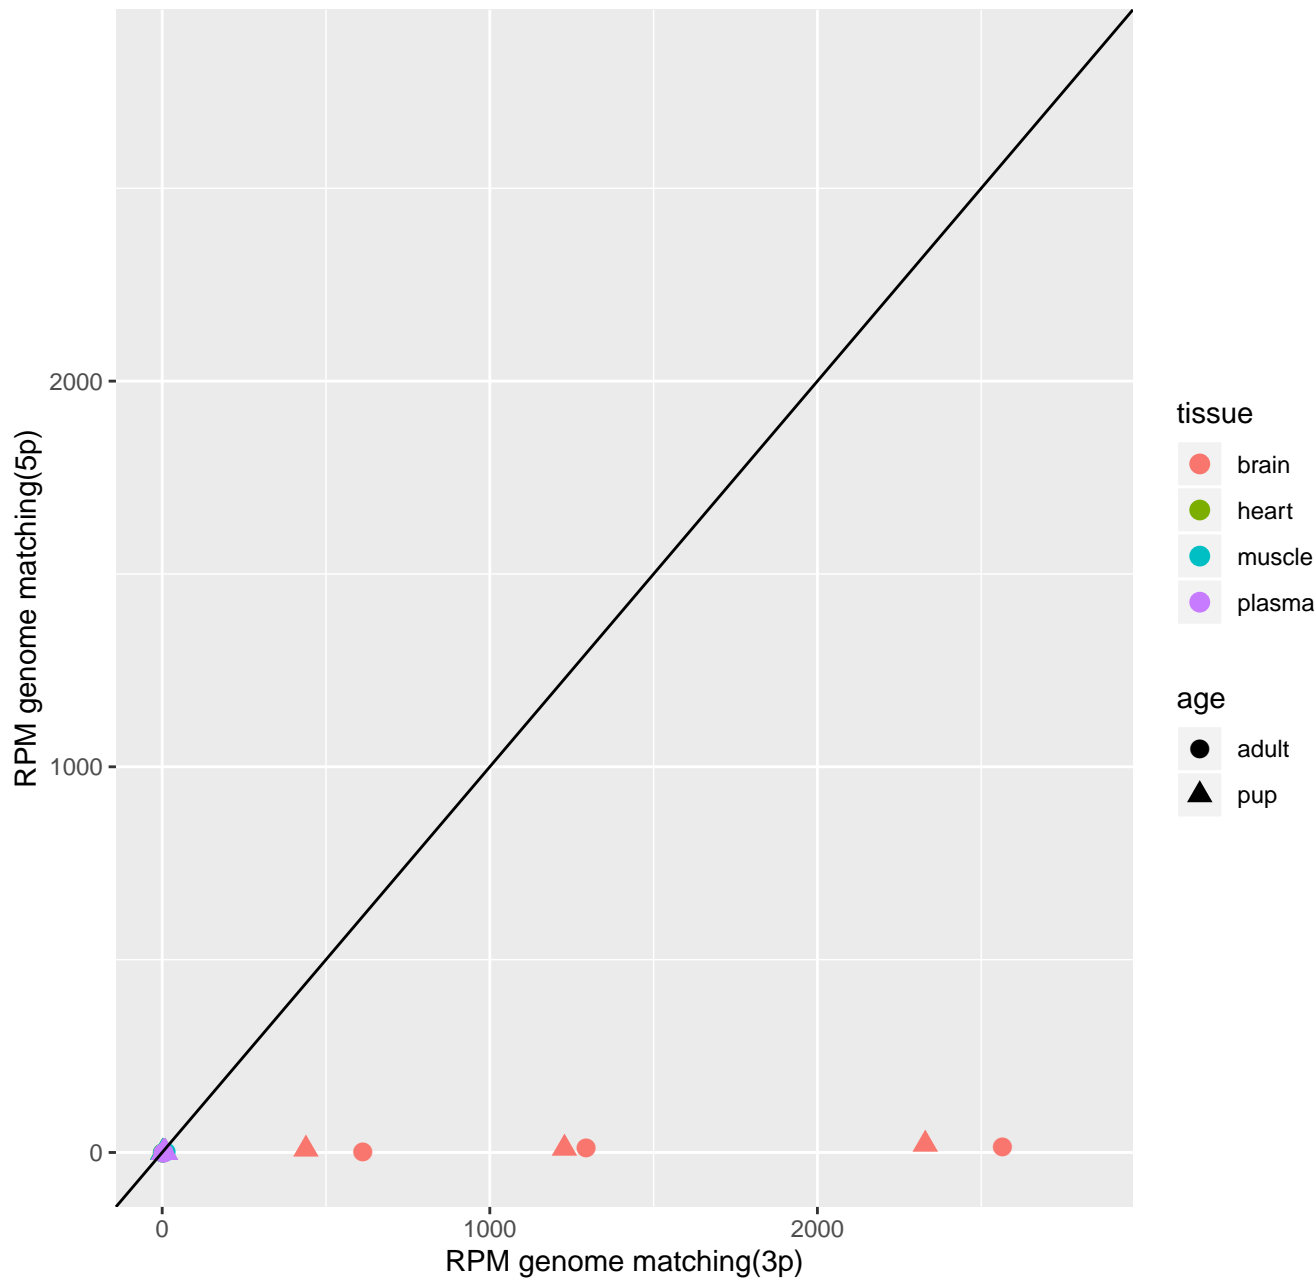



## novel\_14

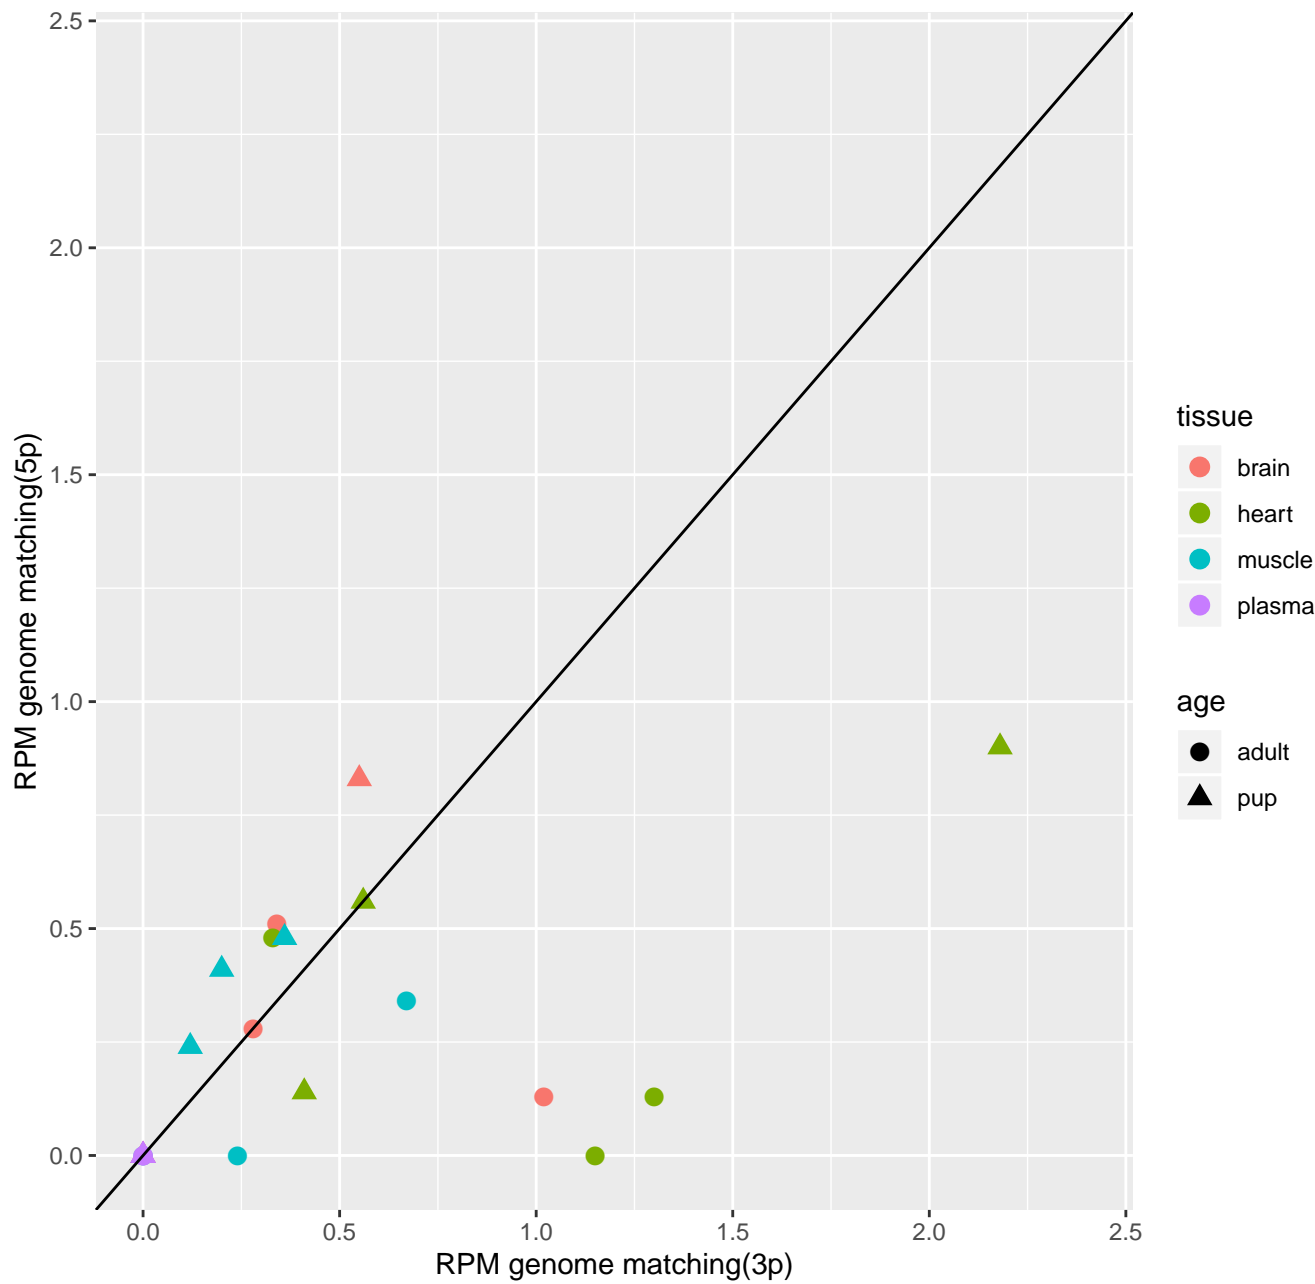

novel\_16

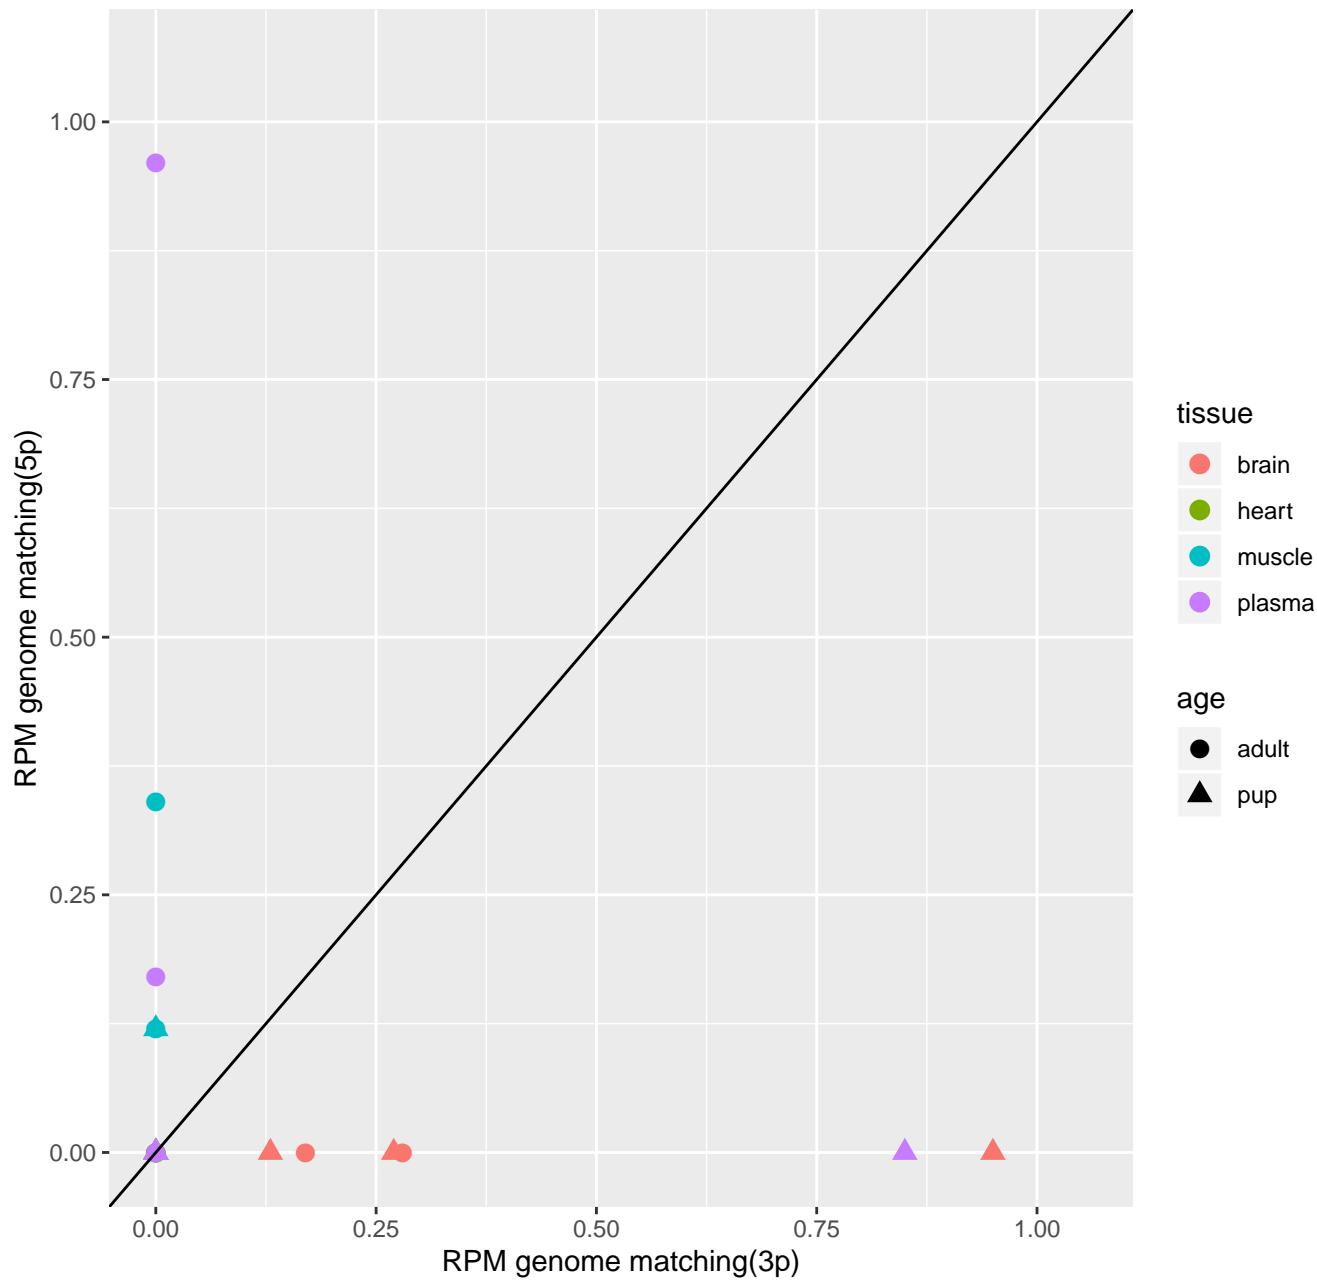

## novel\_17

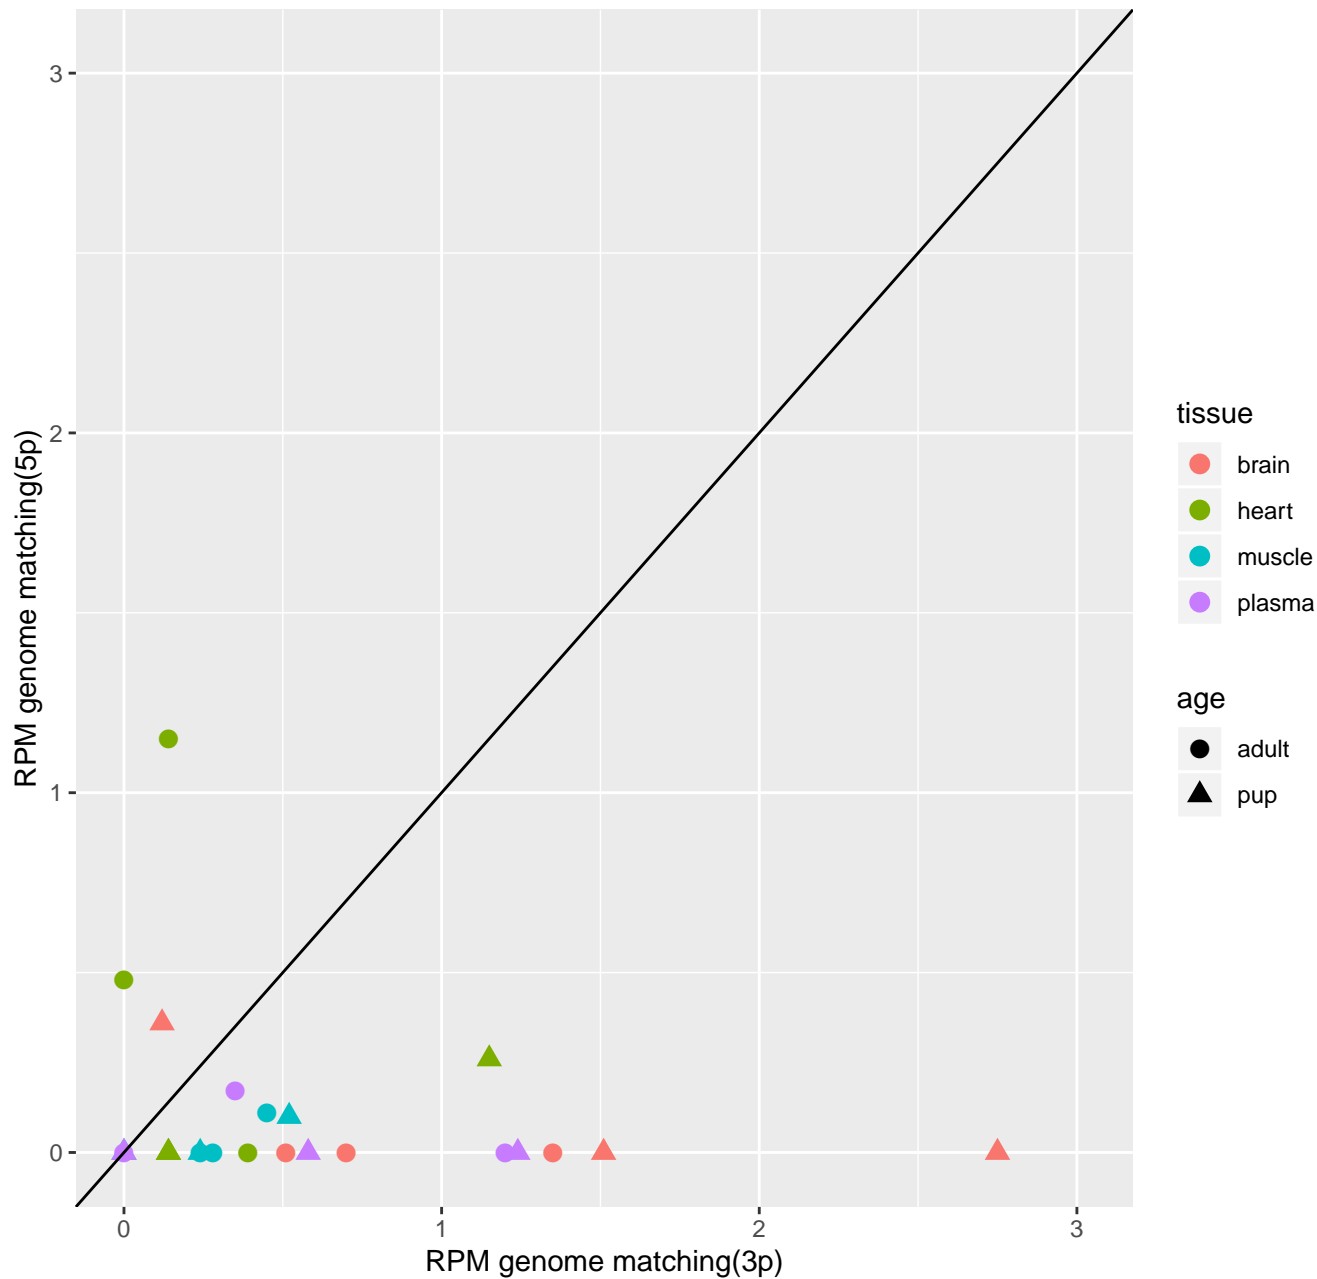

## lwe-miR-196b\_loc1

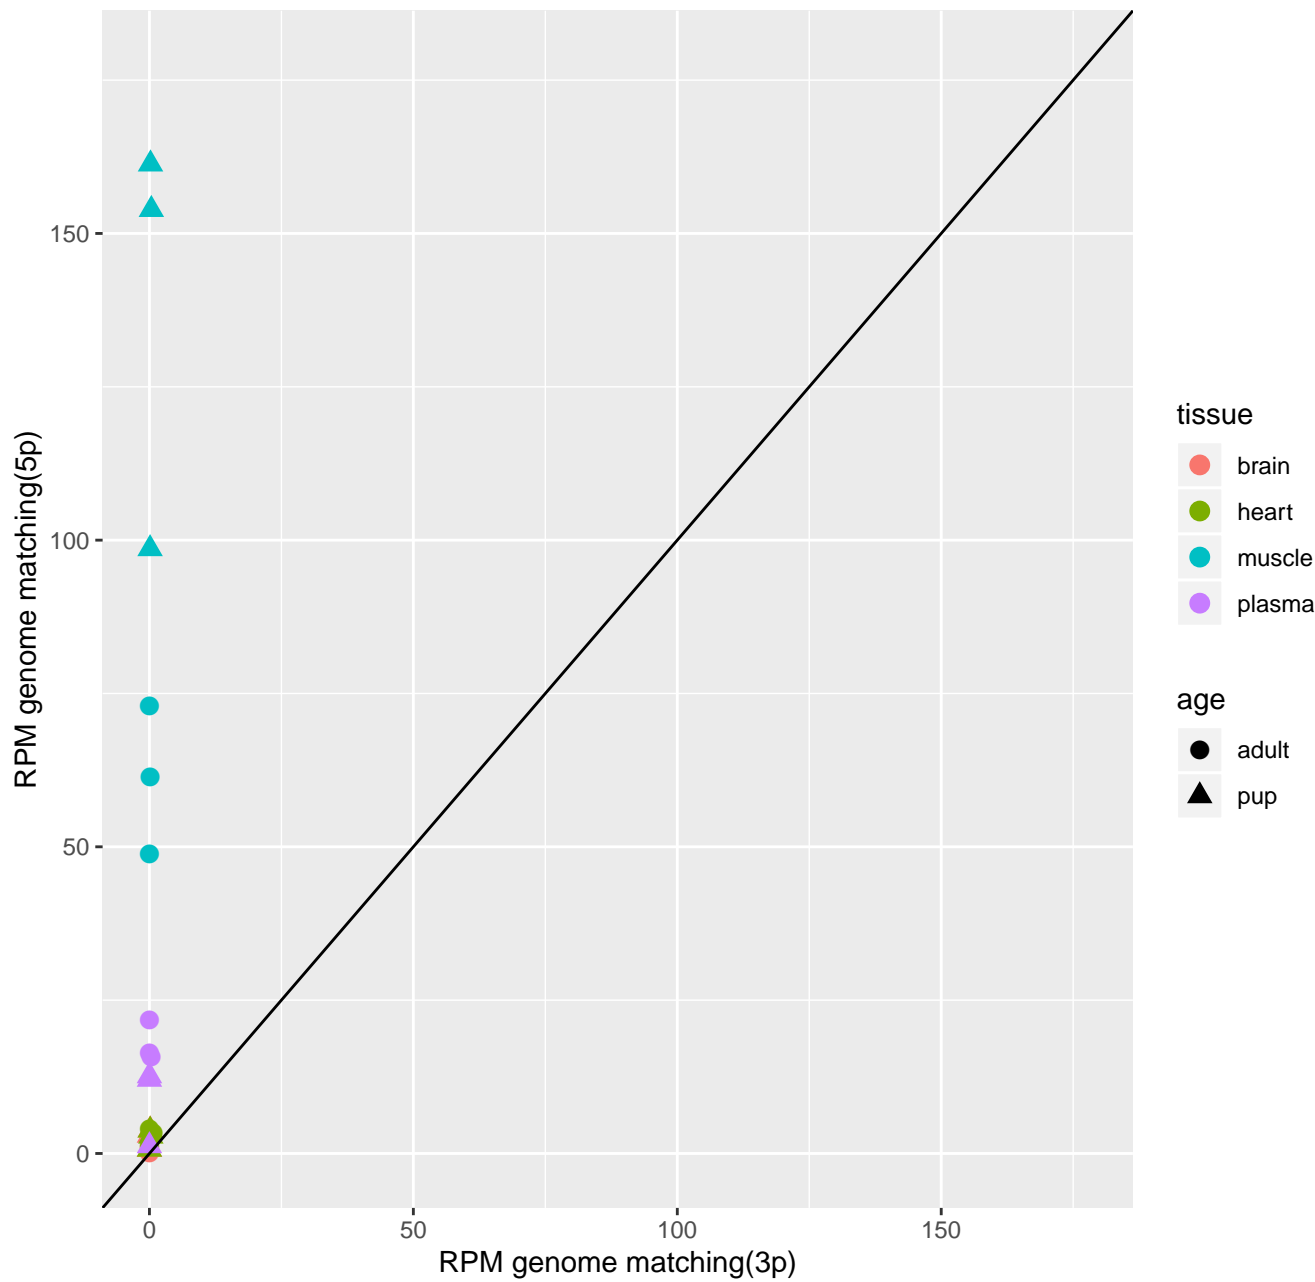

# novel\_18

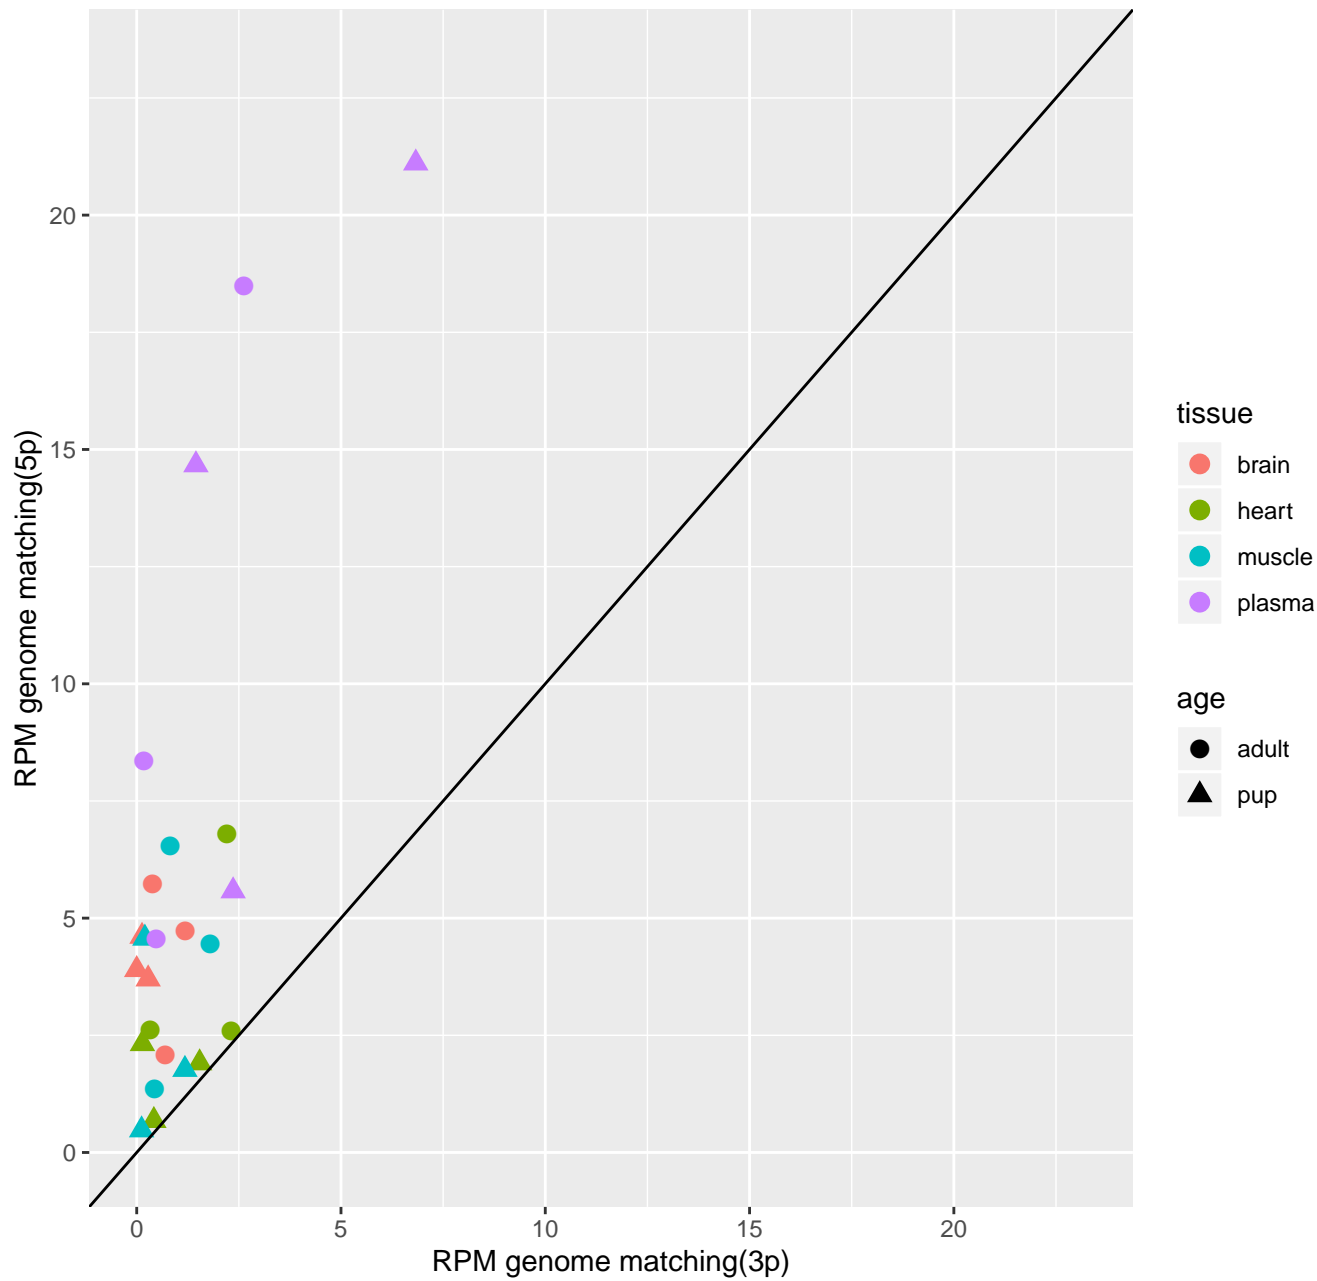



## novel\_19

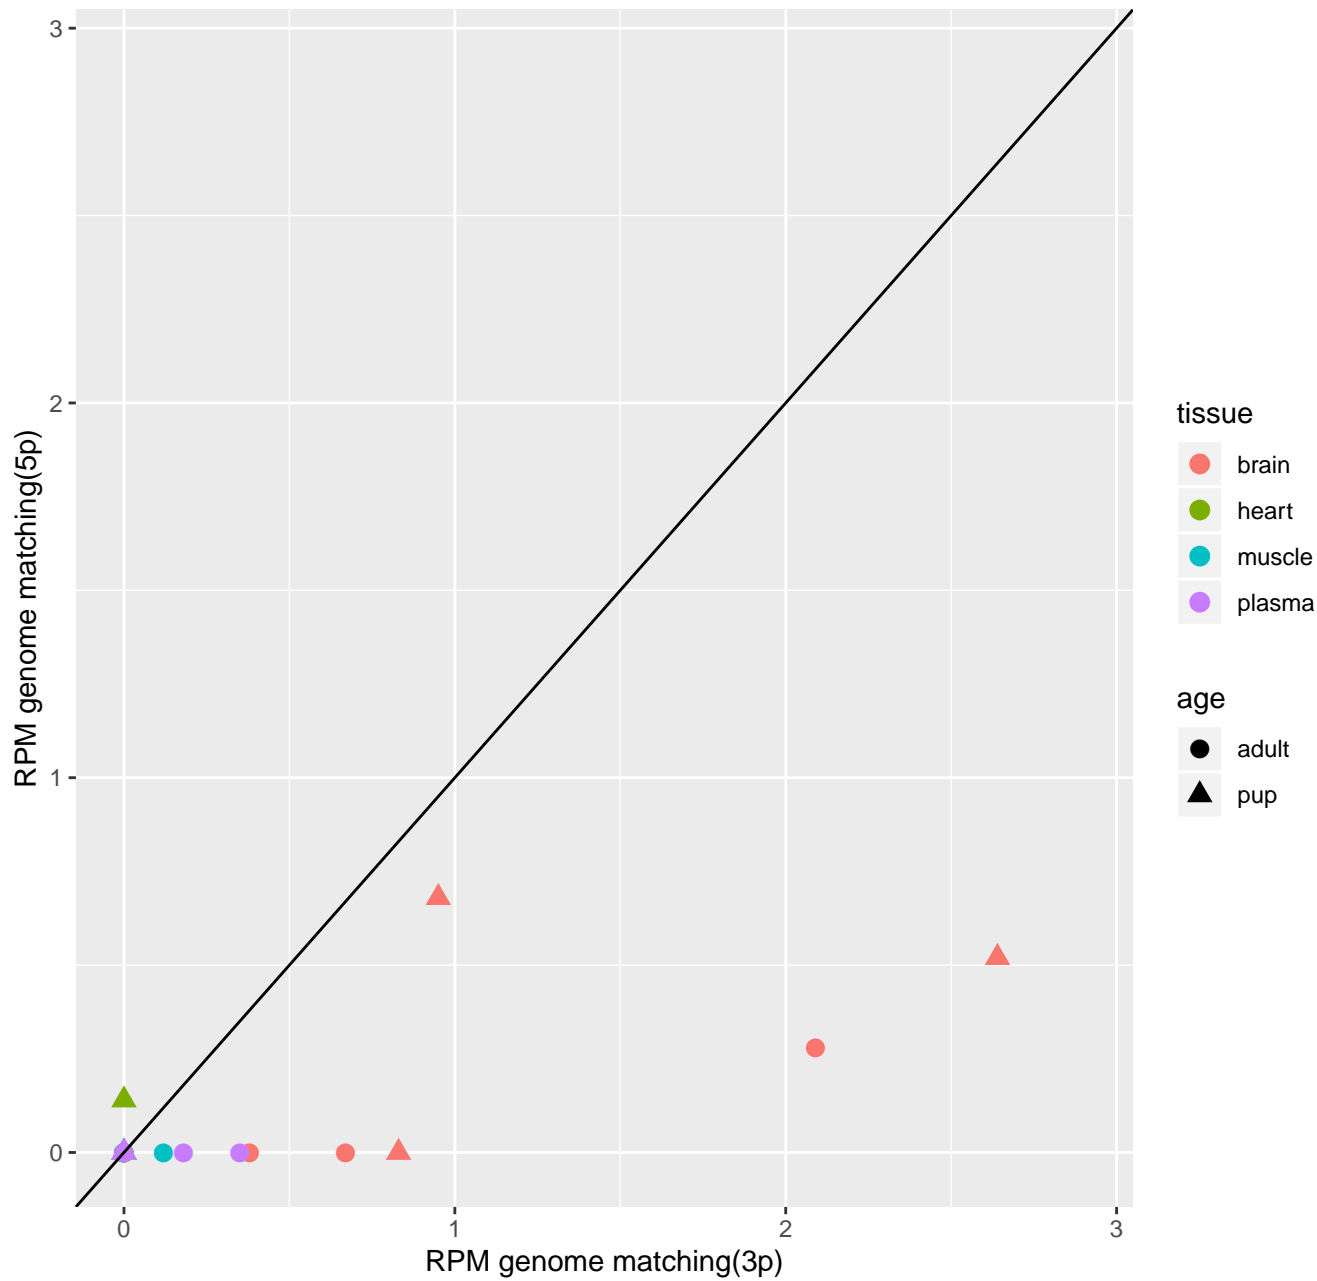

novel\_20

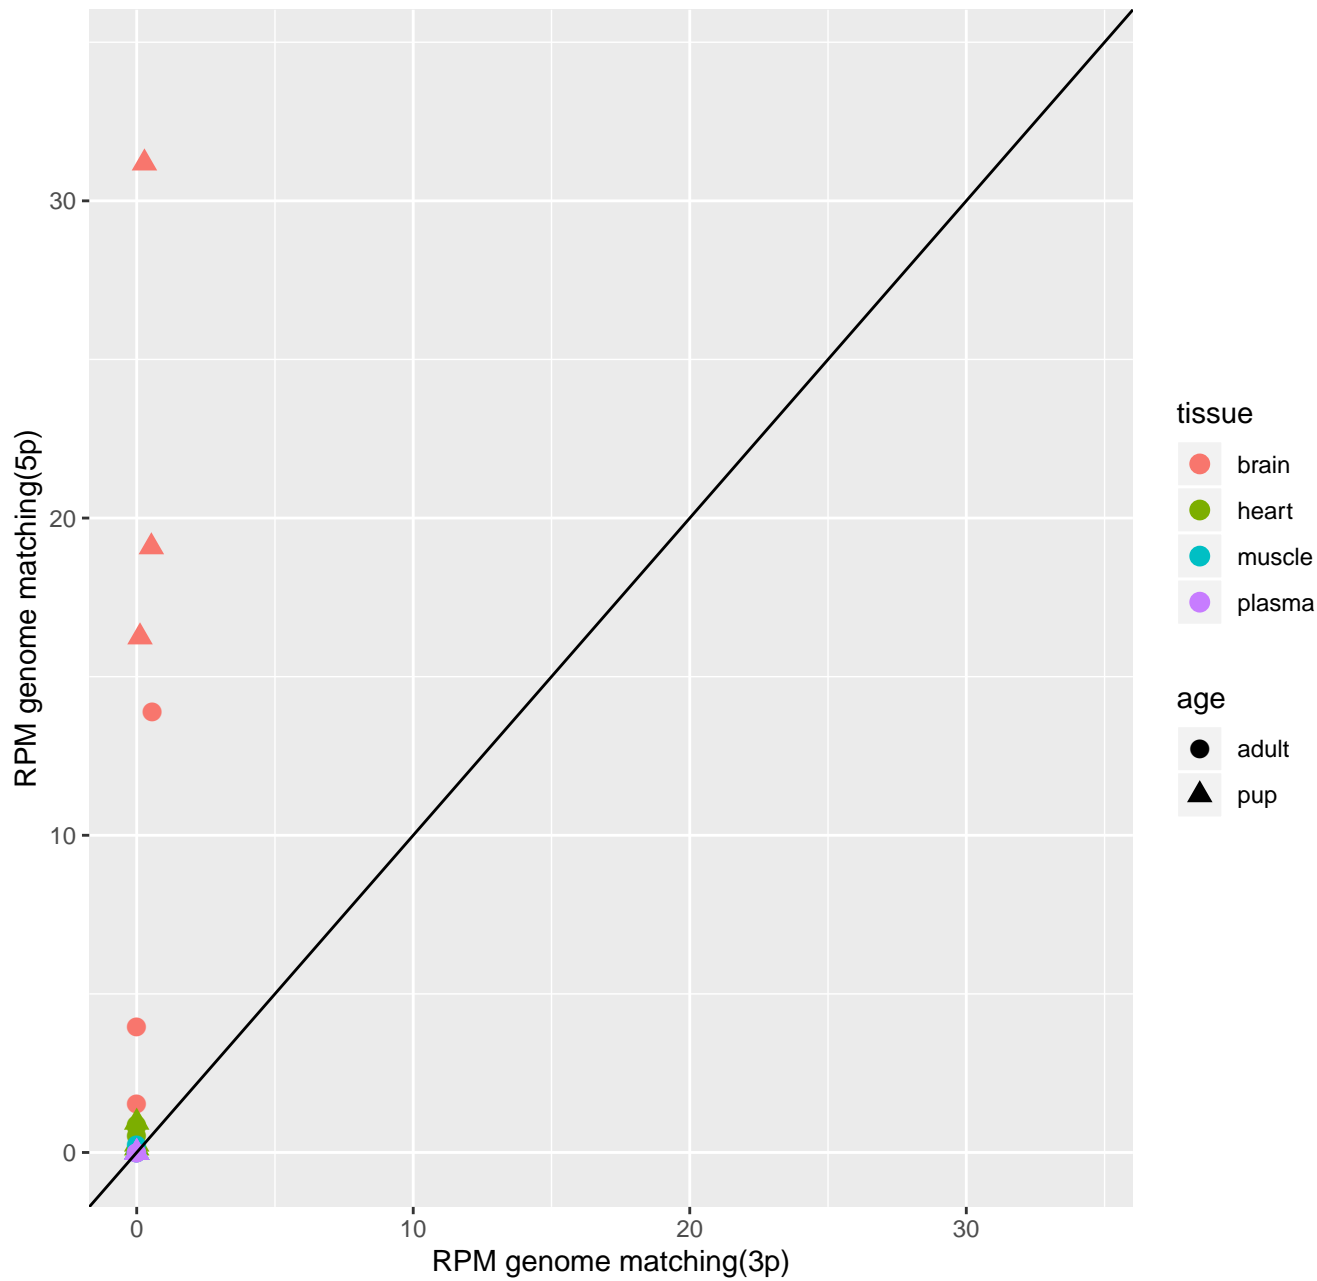

## lwe-miR-135\_loc1

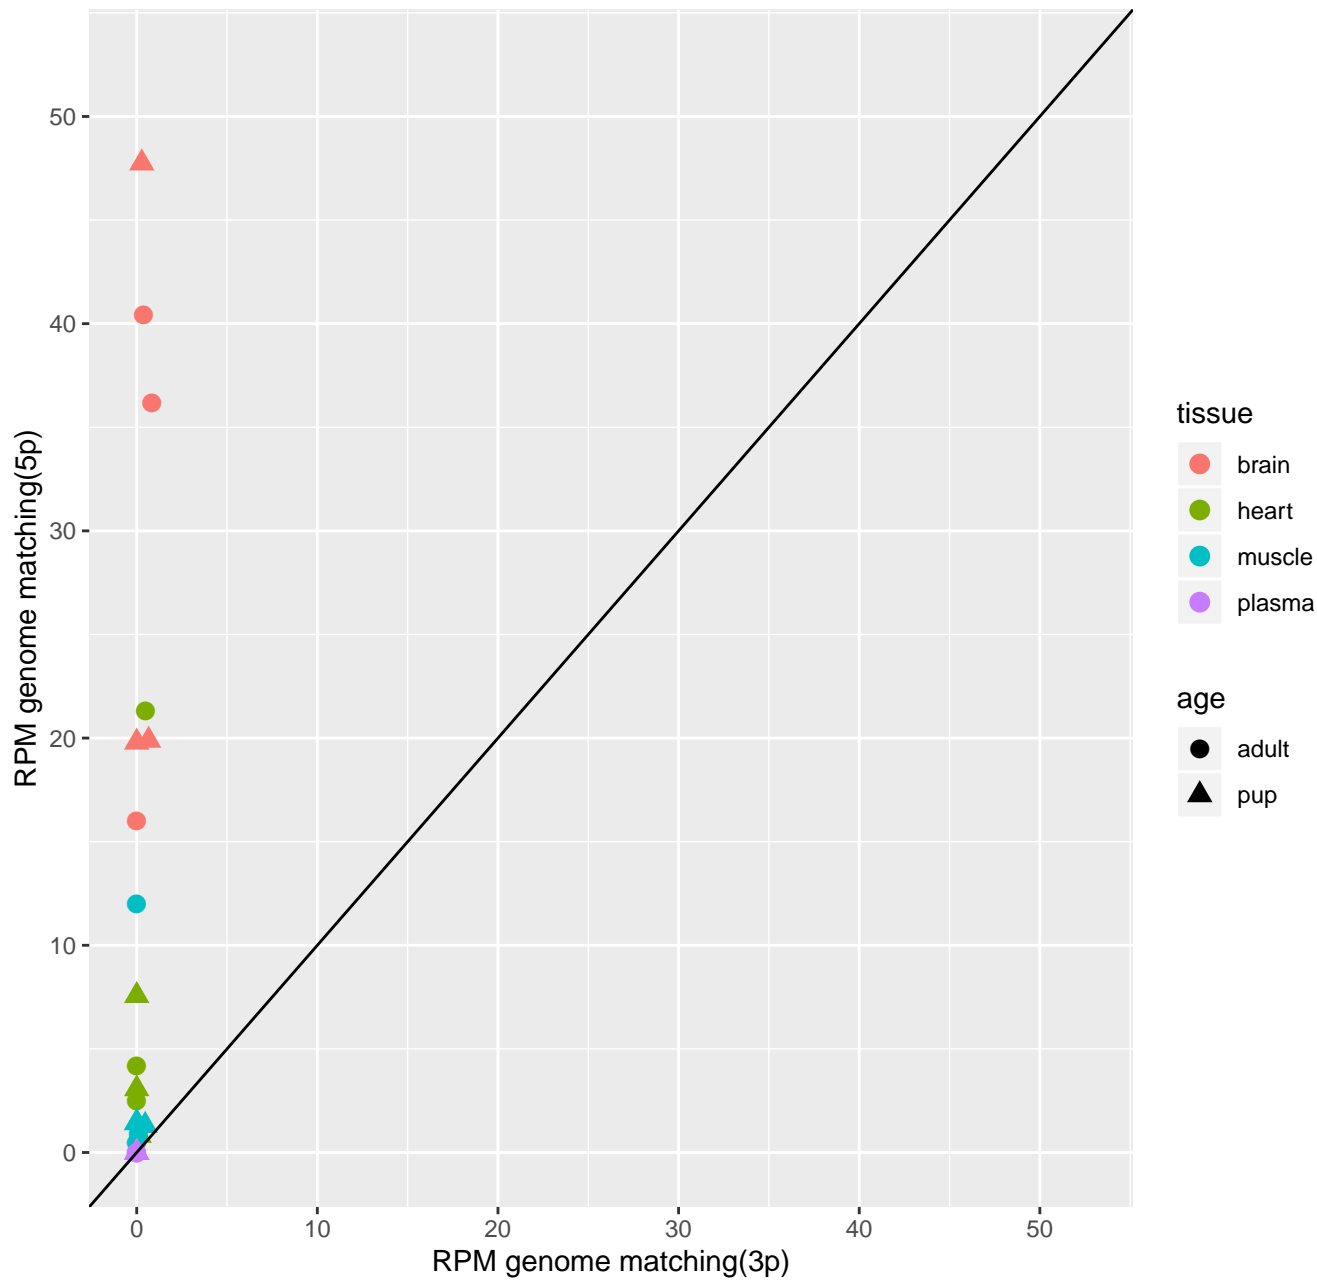

## let-7g\_loc1

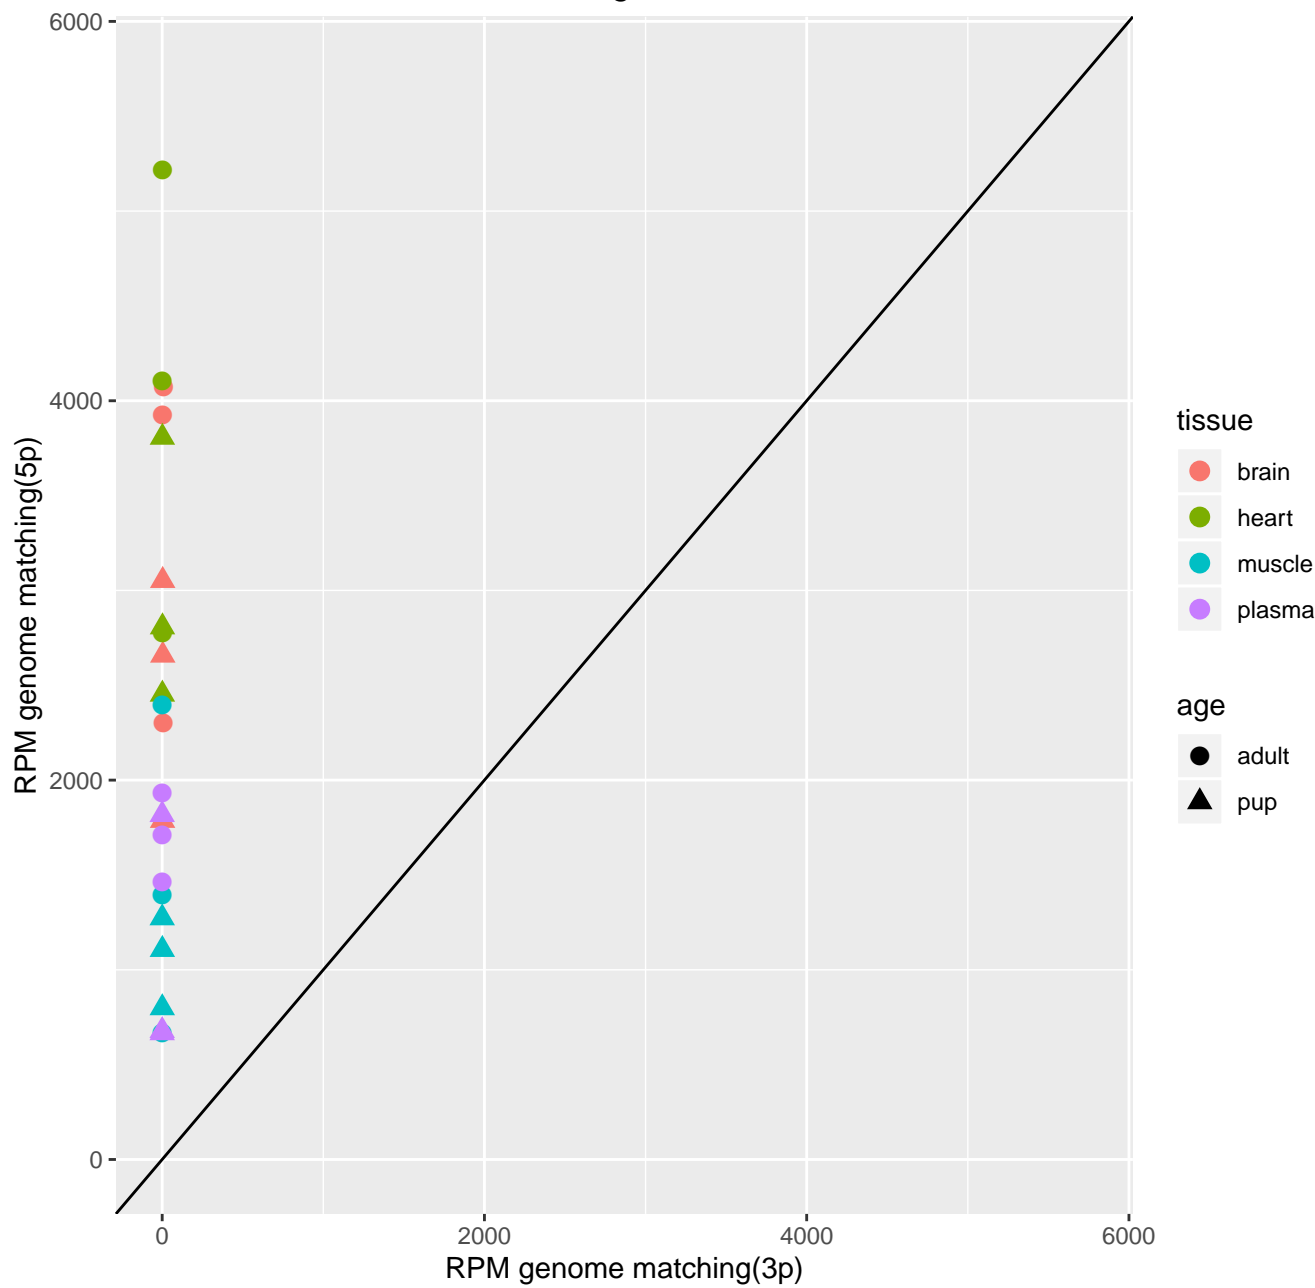

## novel\_21

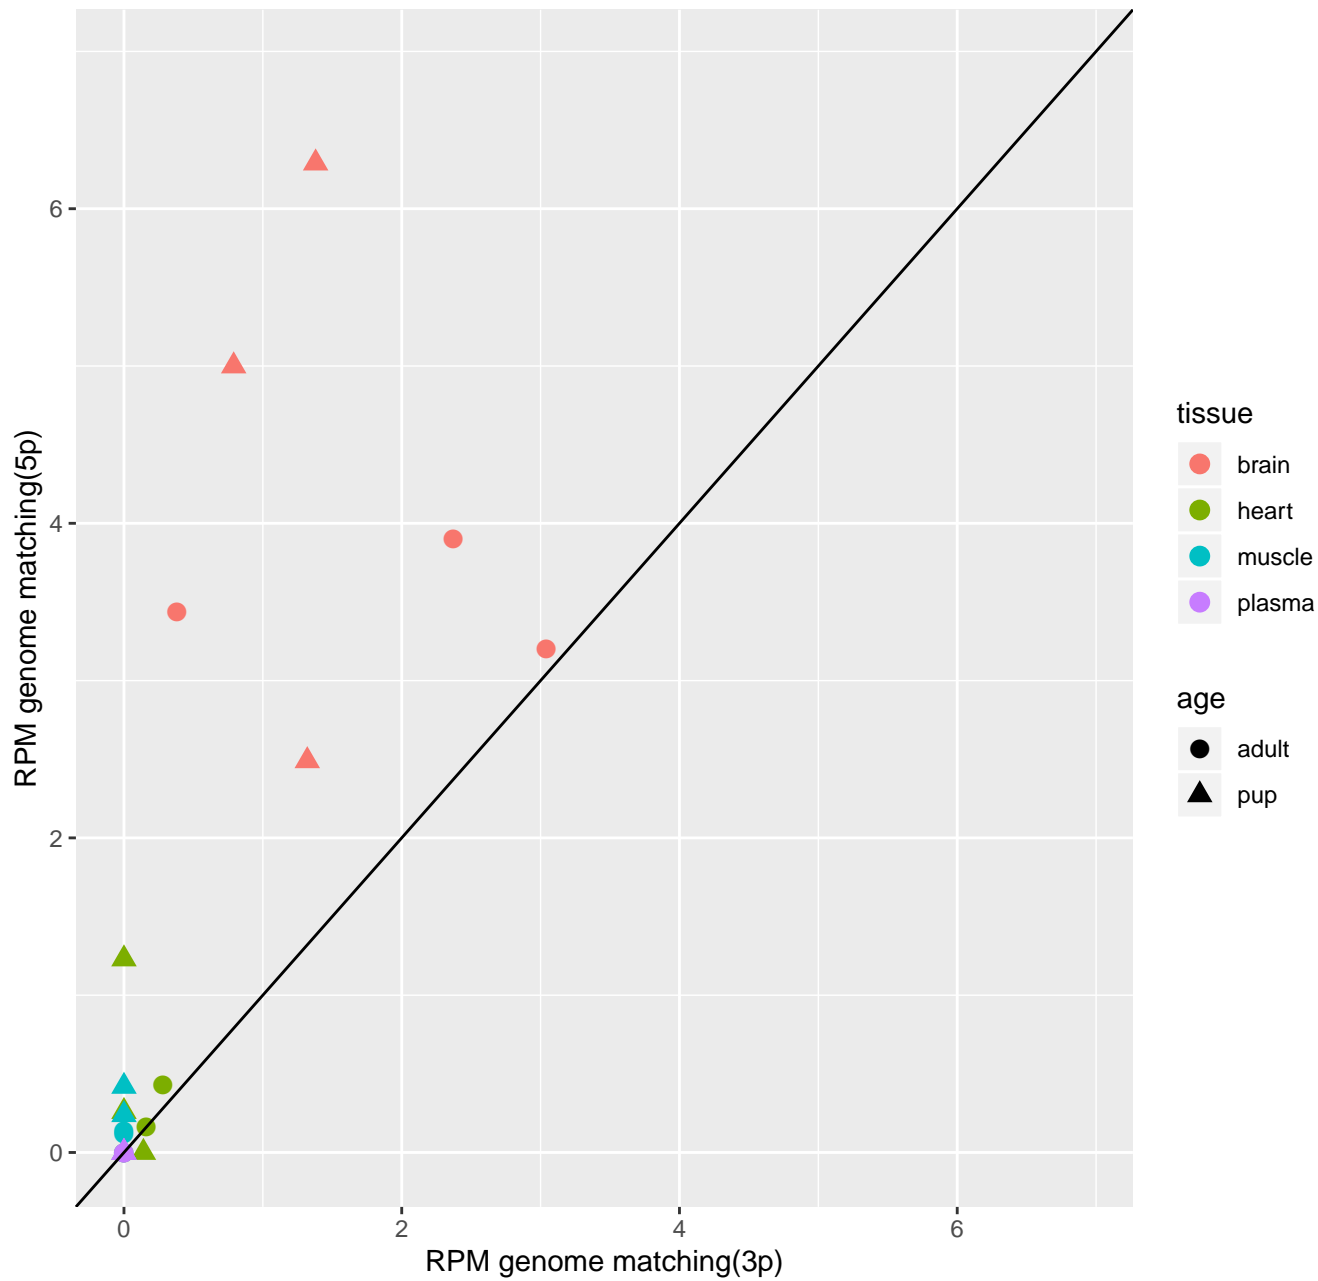

novel\_22

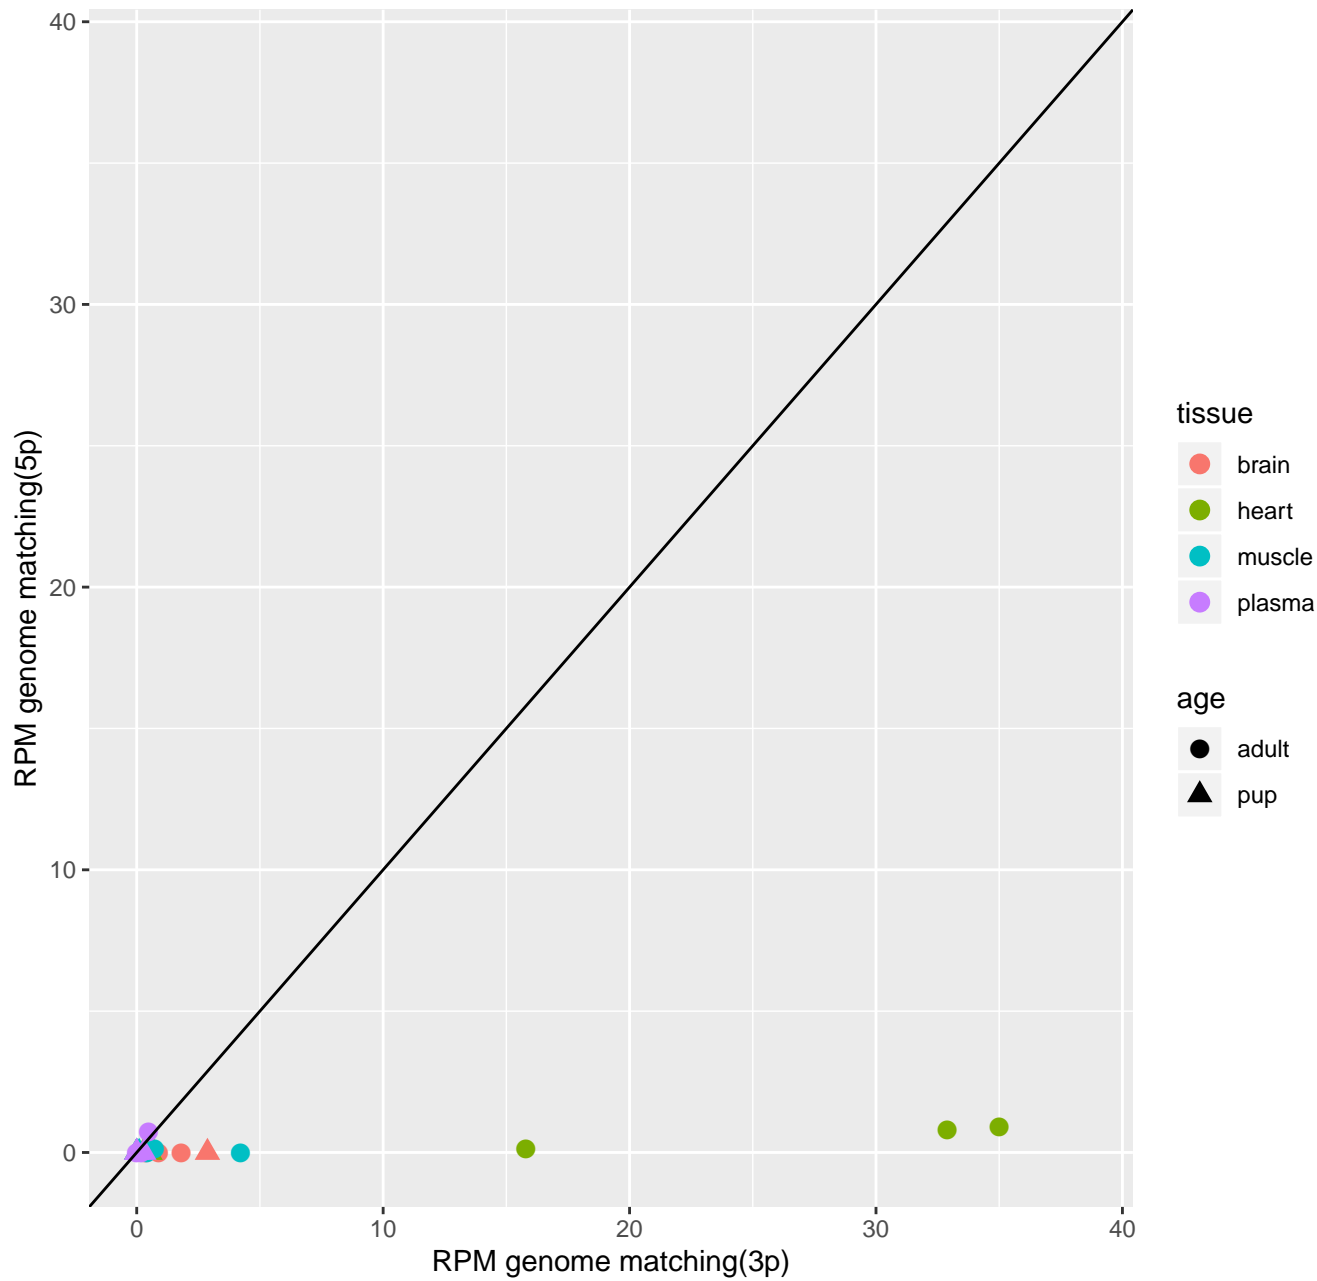

novel\_23

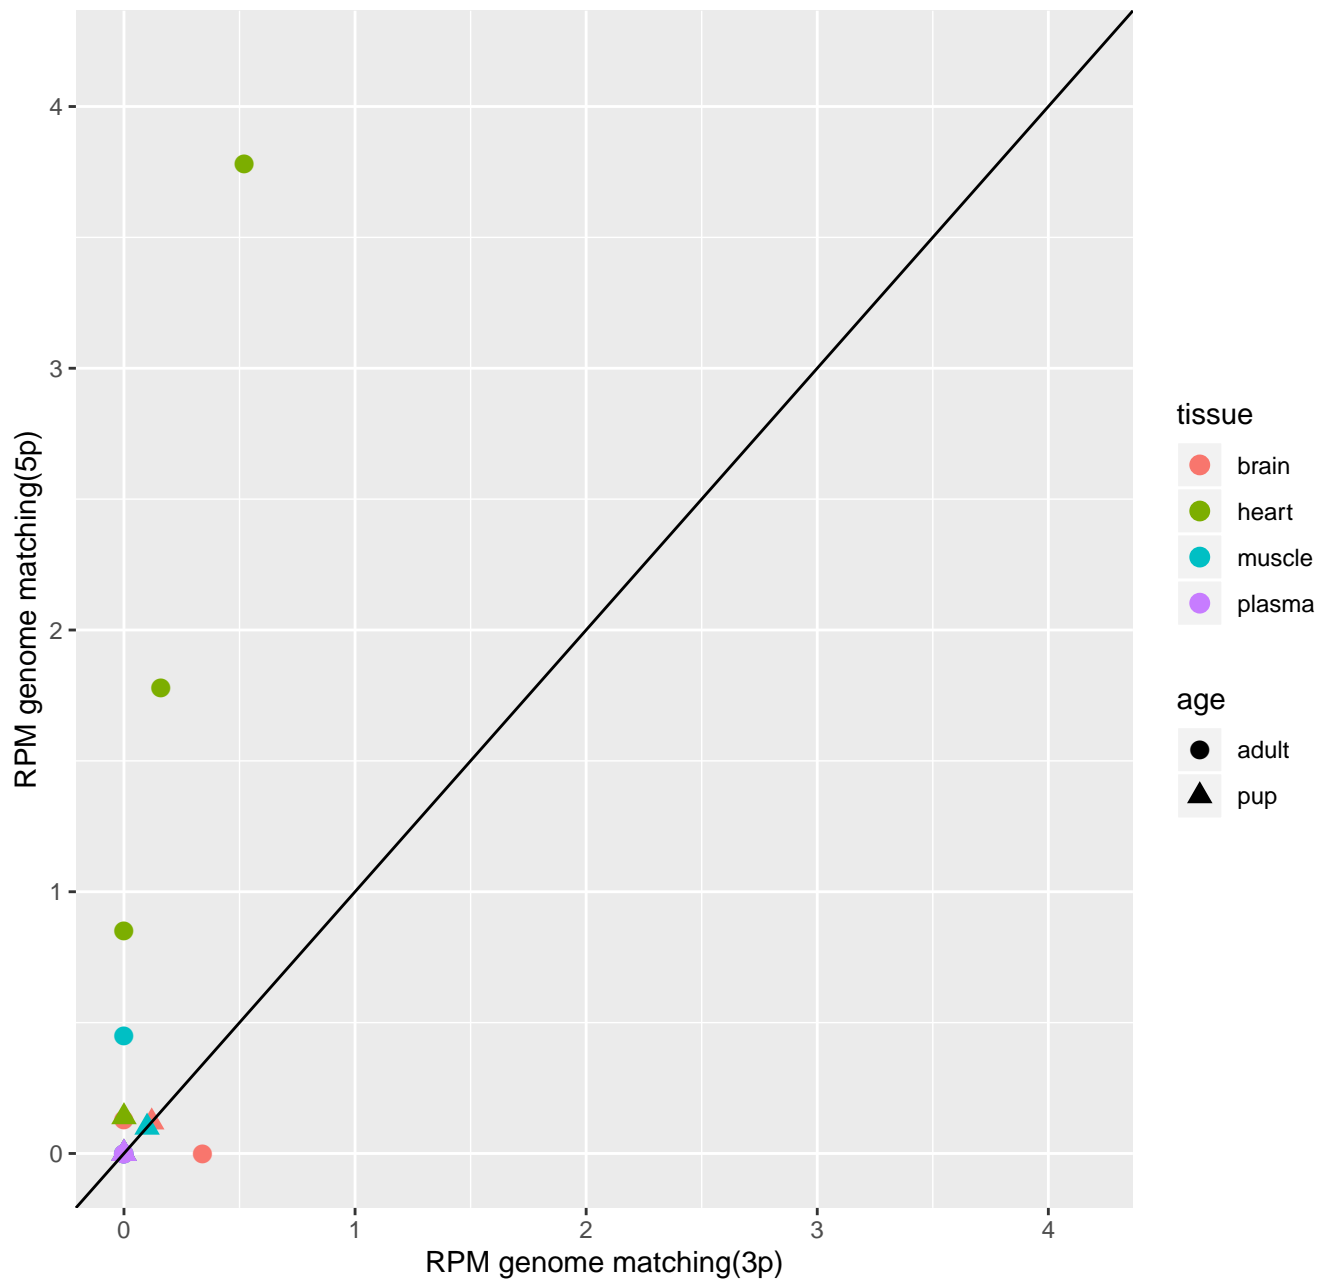

novel\_24

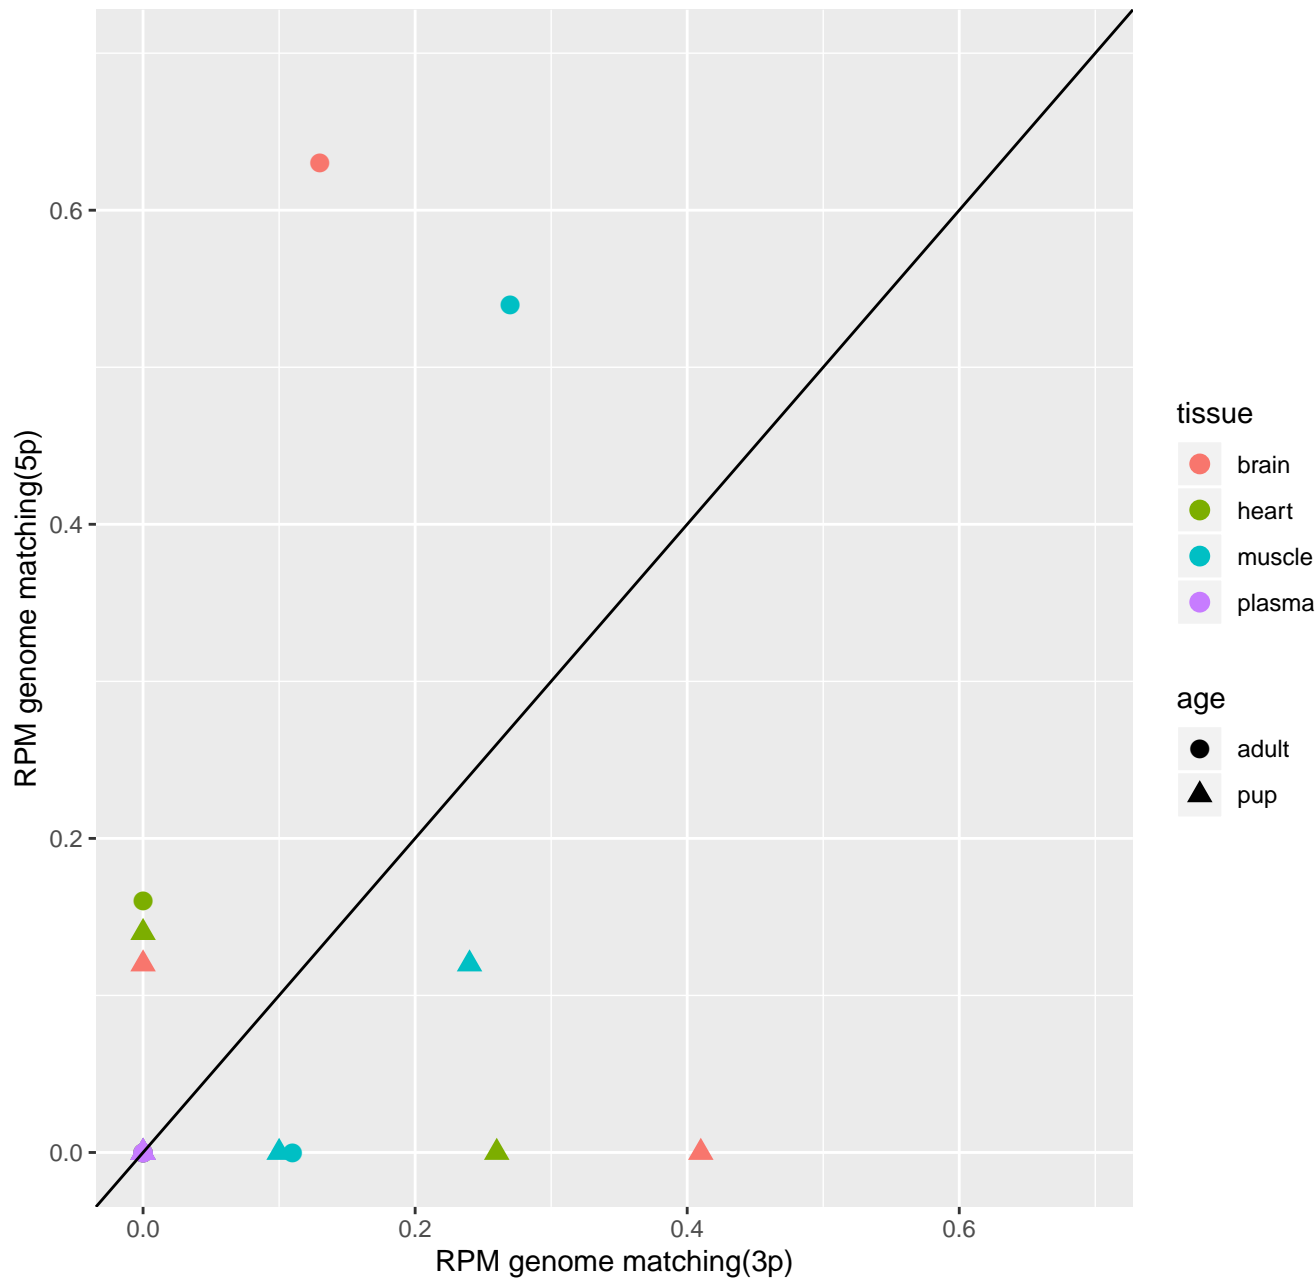



## lwe-miR-628a\_loc1

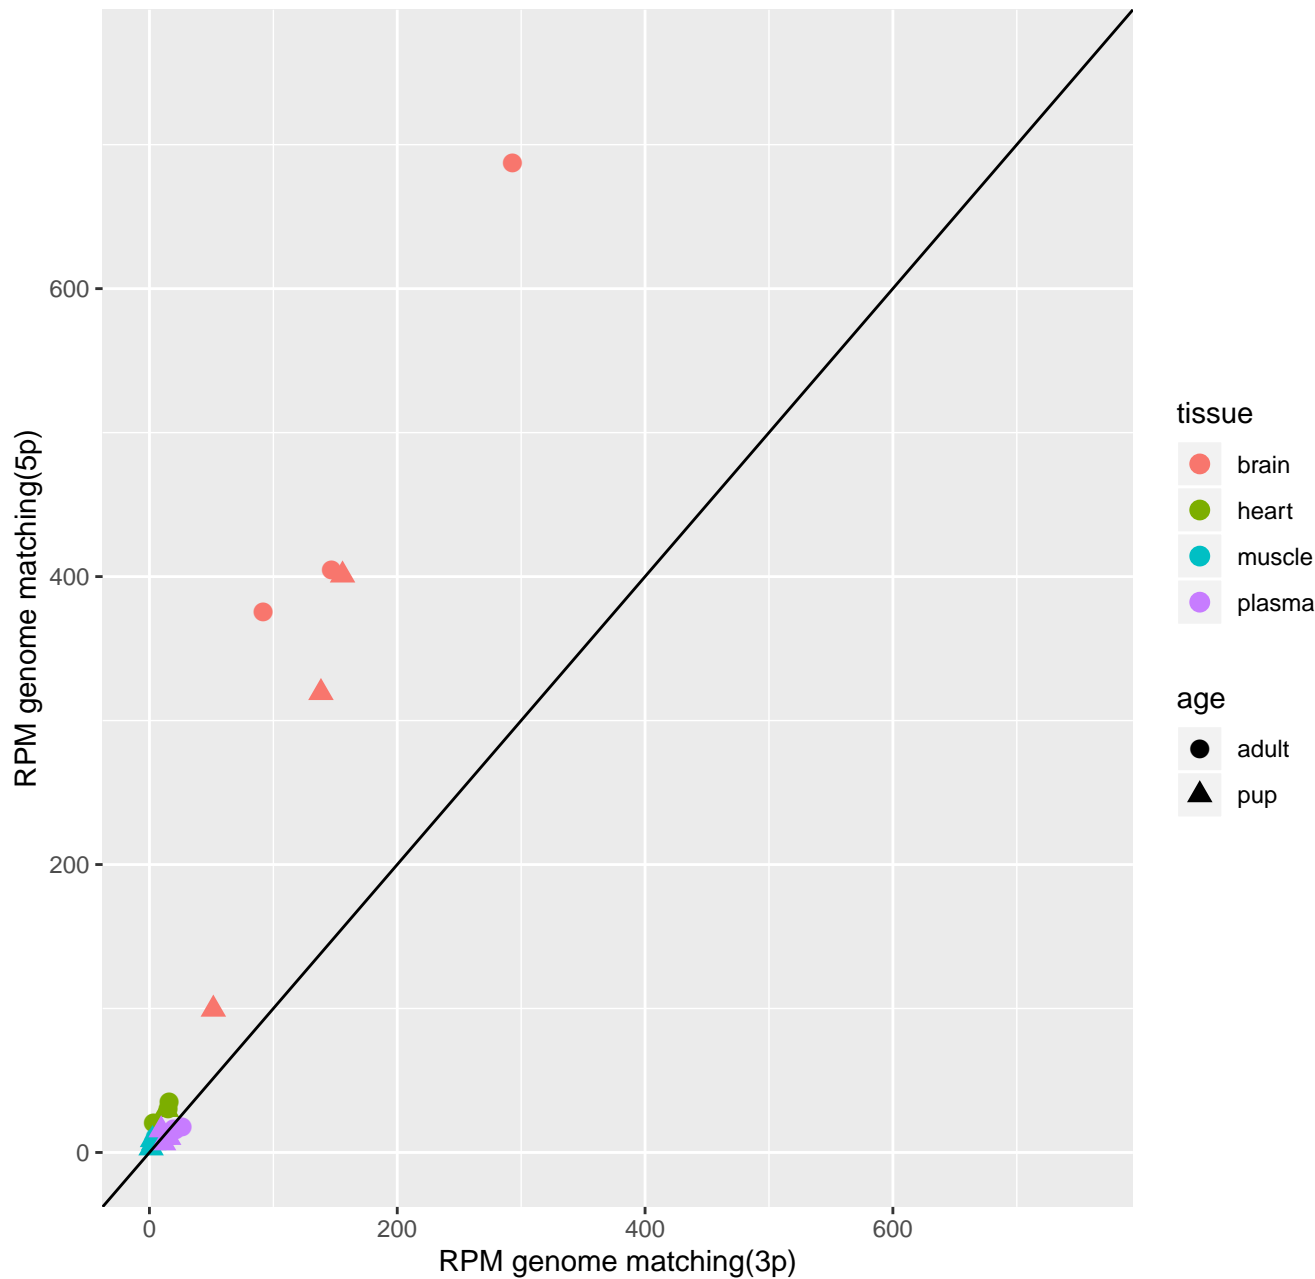

novel\_25

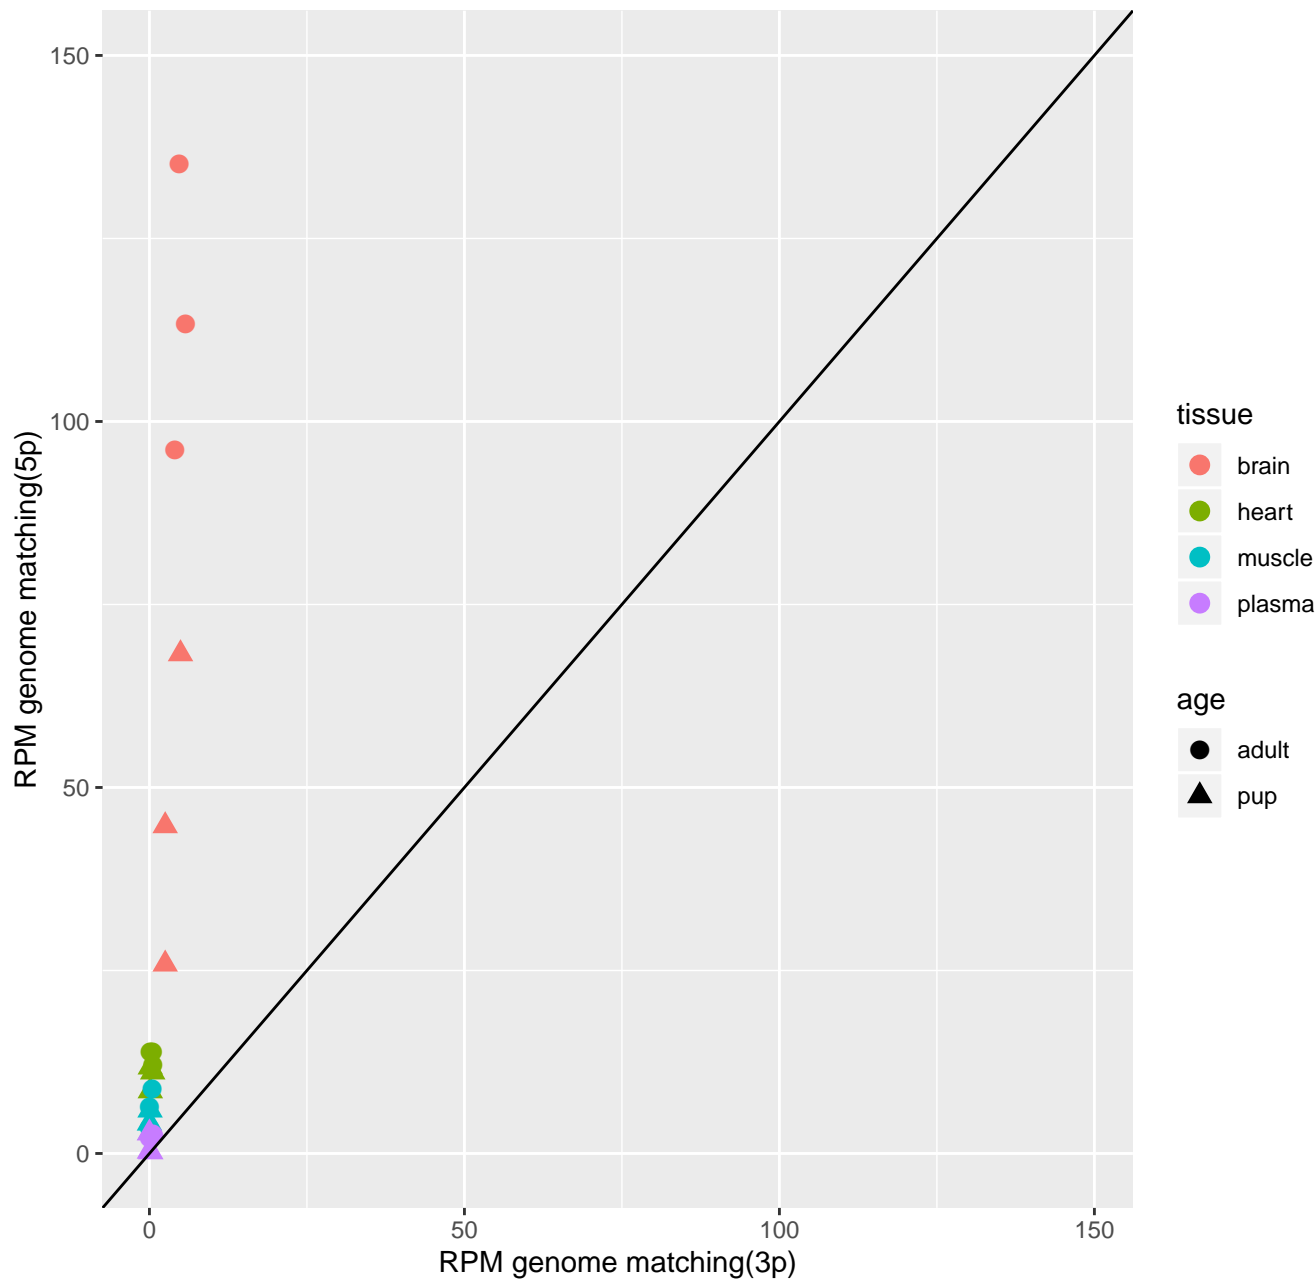

novel\_26

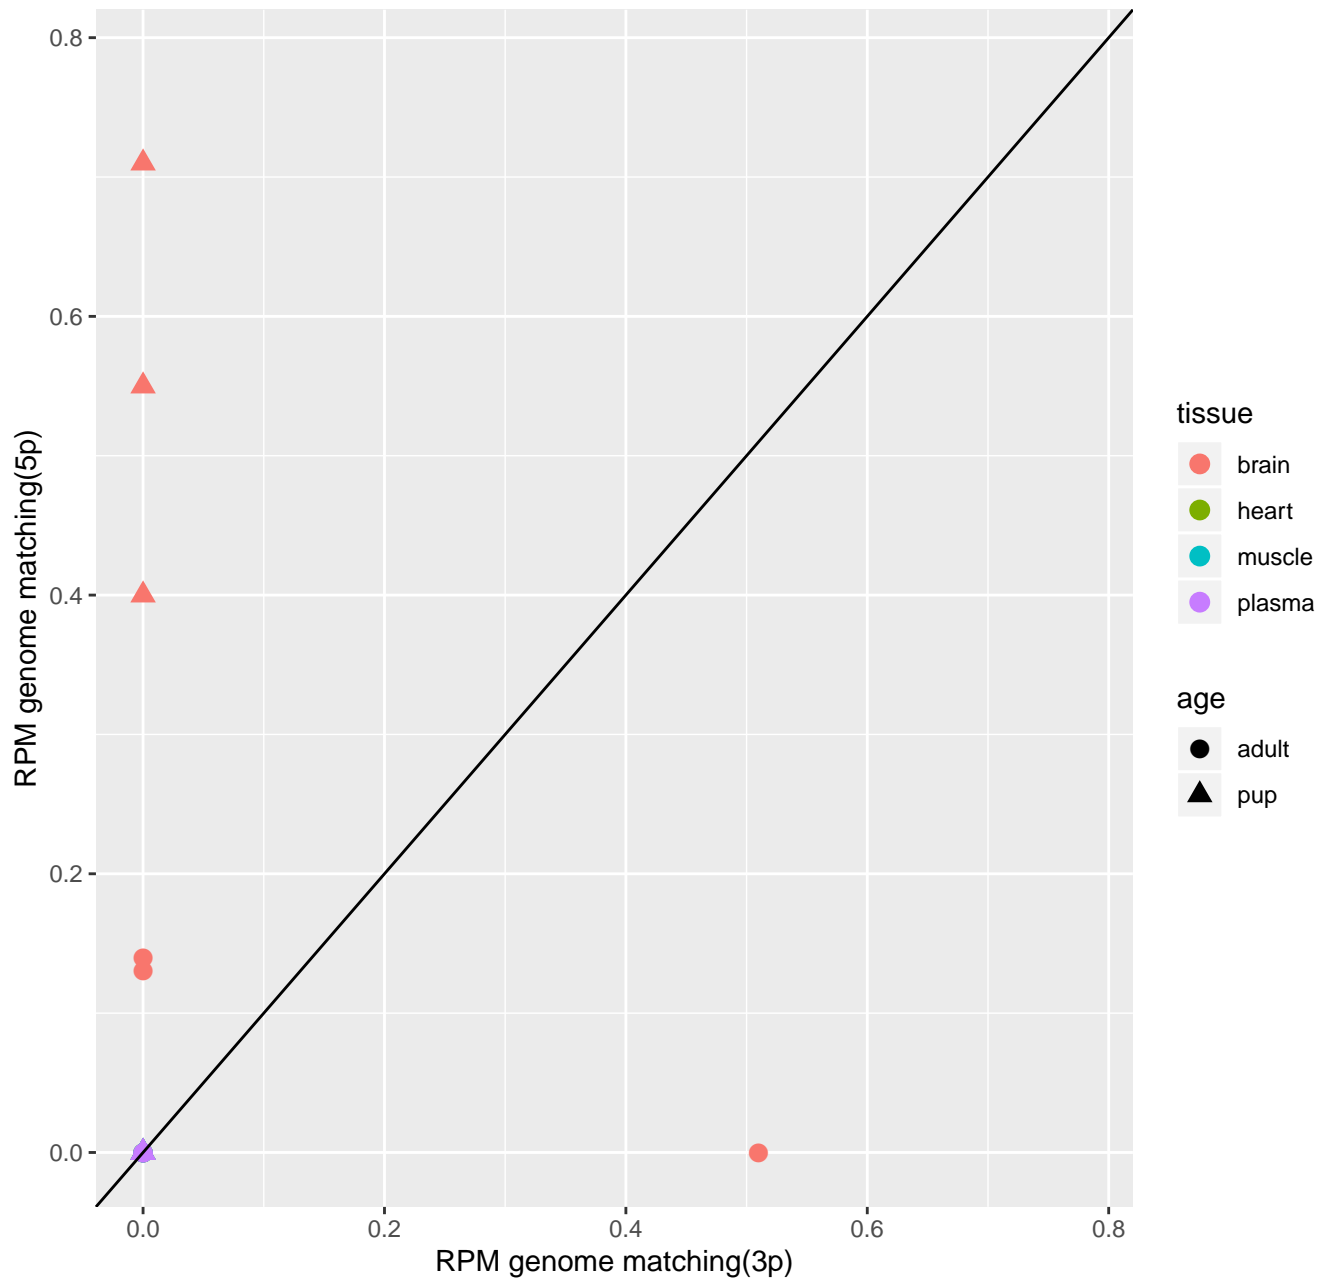

novel\_27

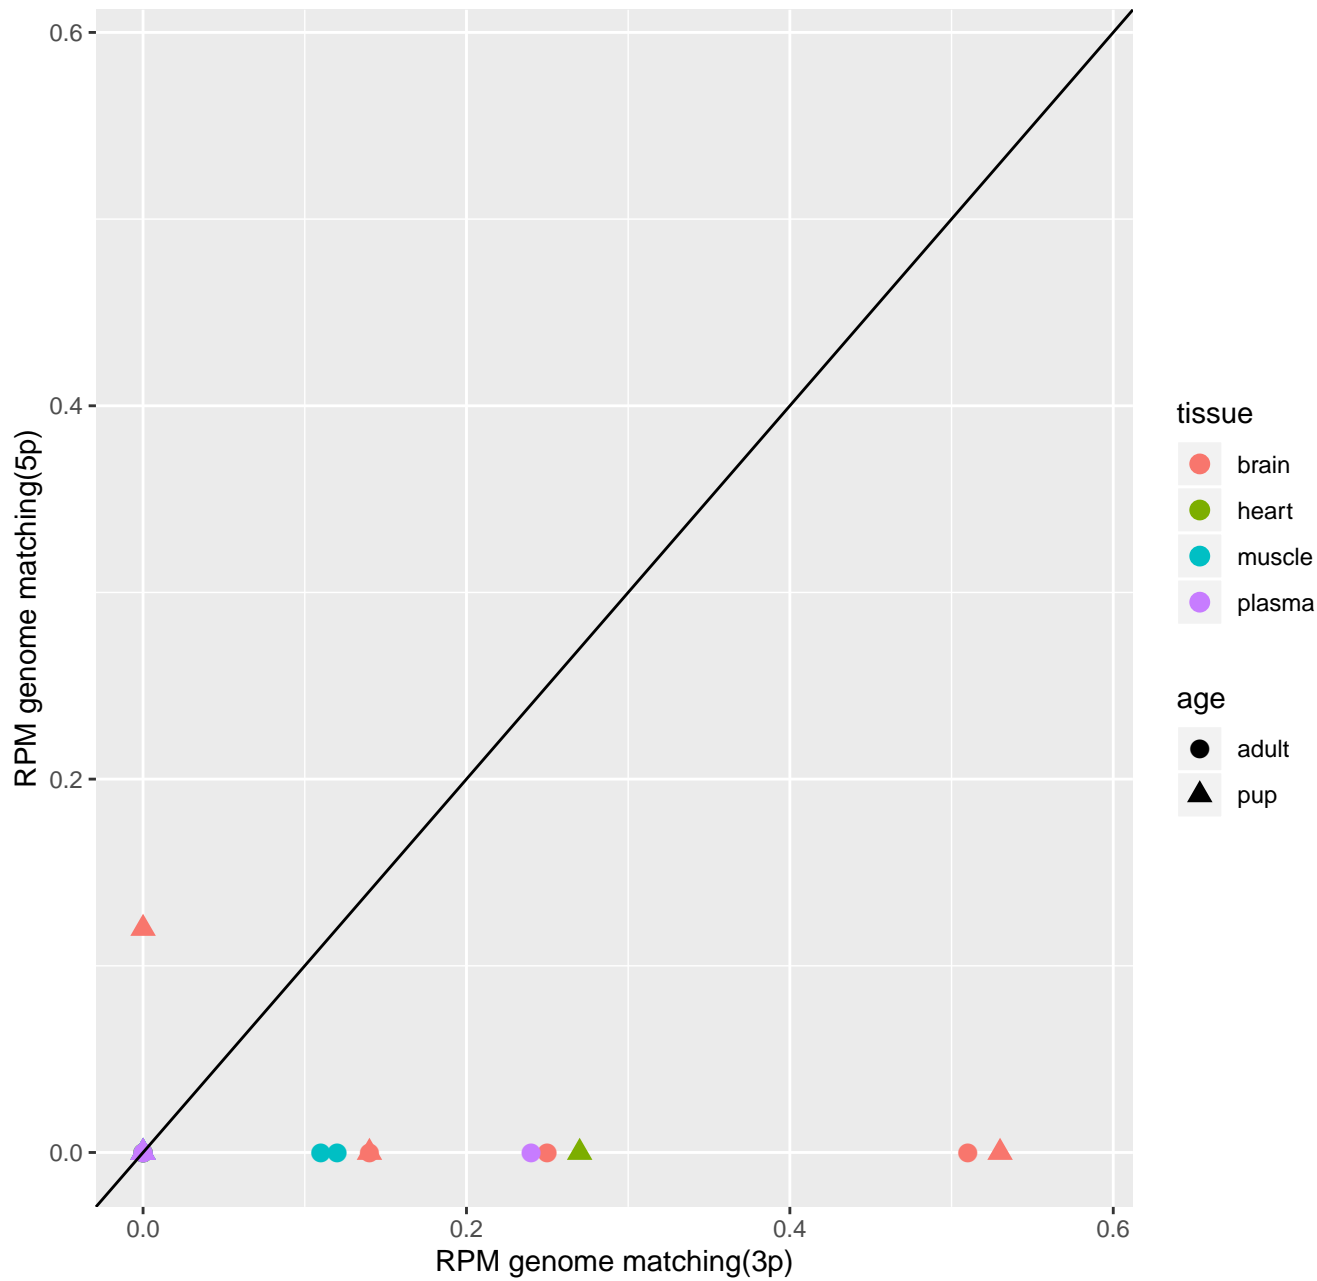

## lwe-miR-200a\_loc1

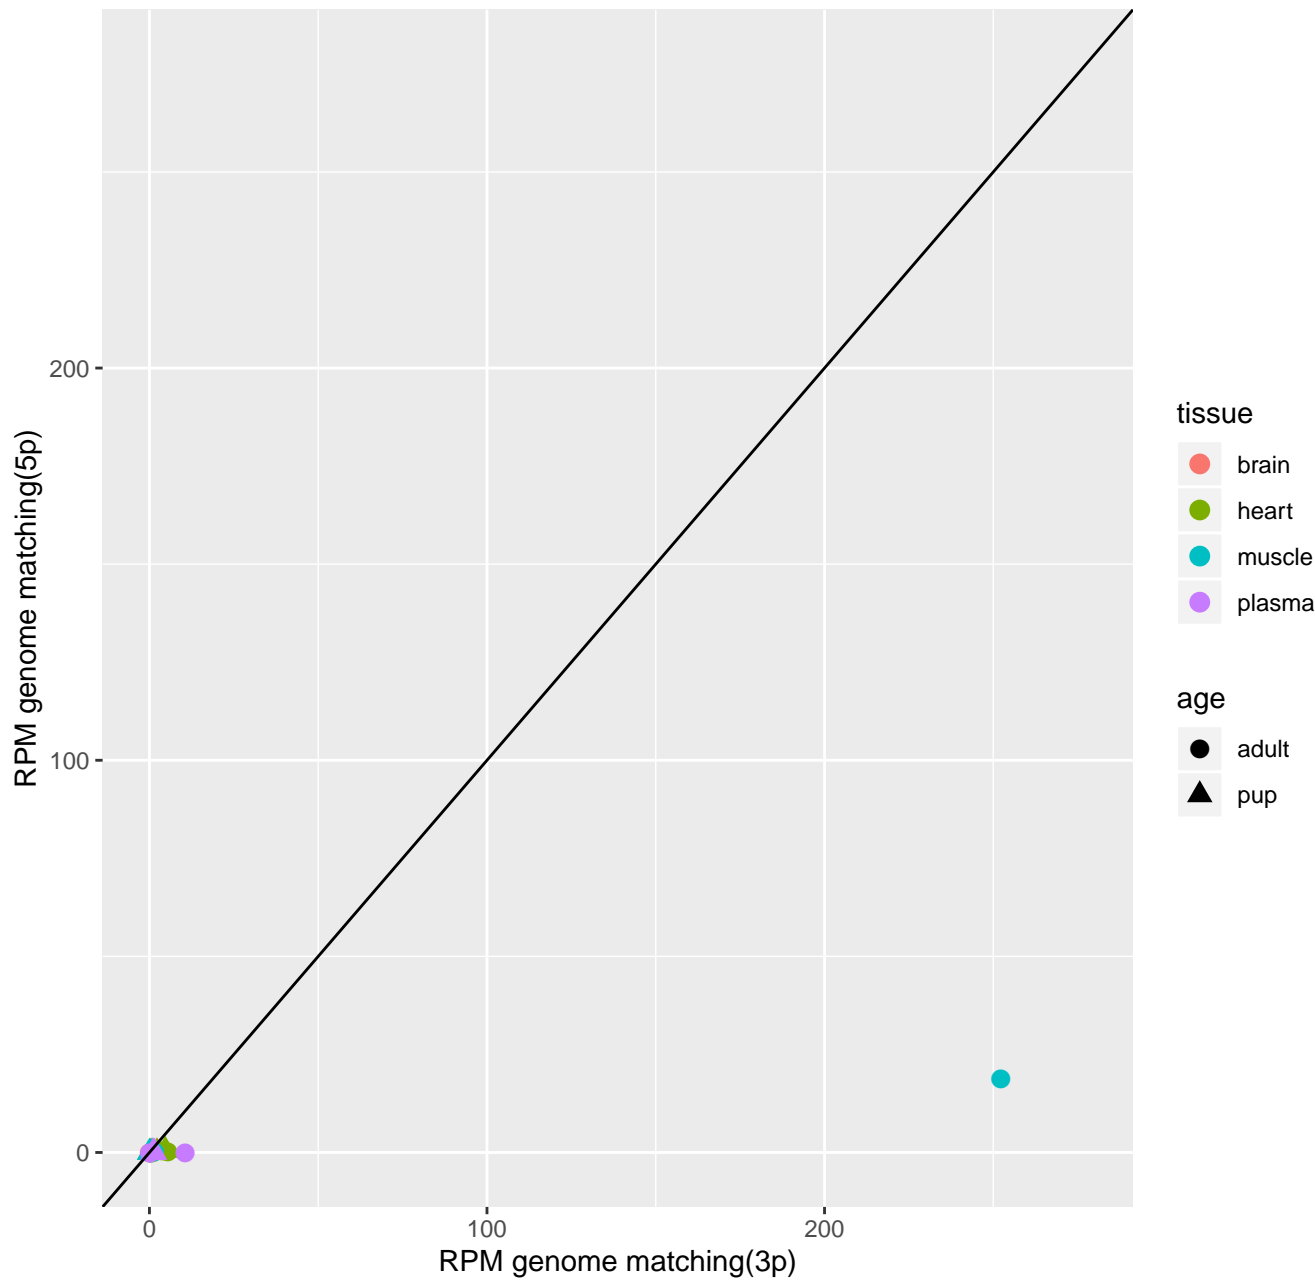

novel\_28

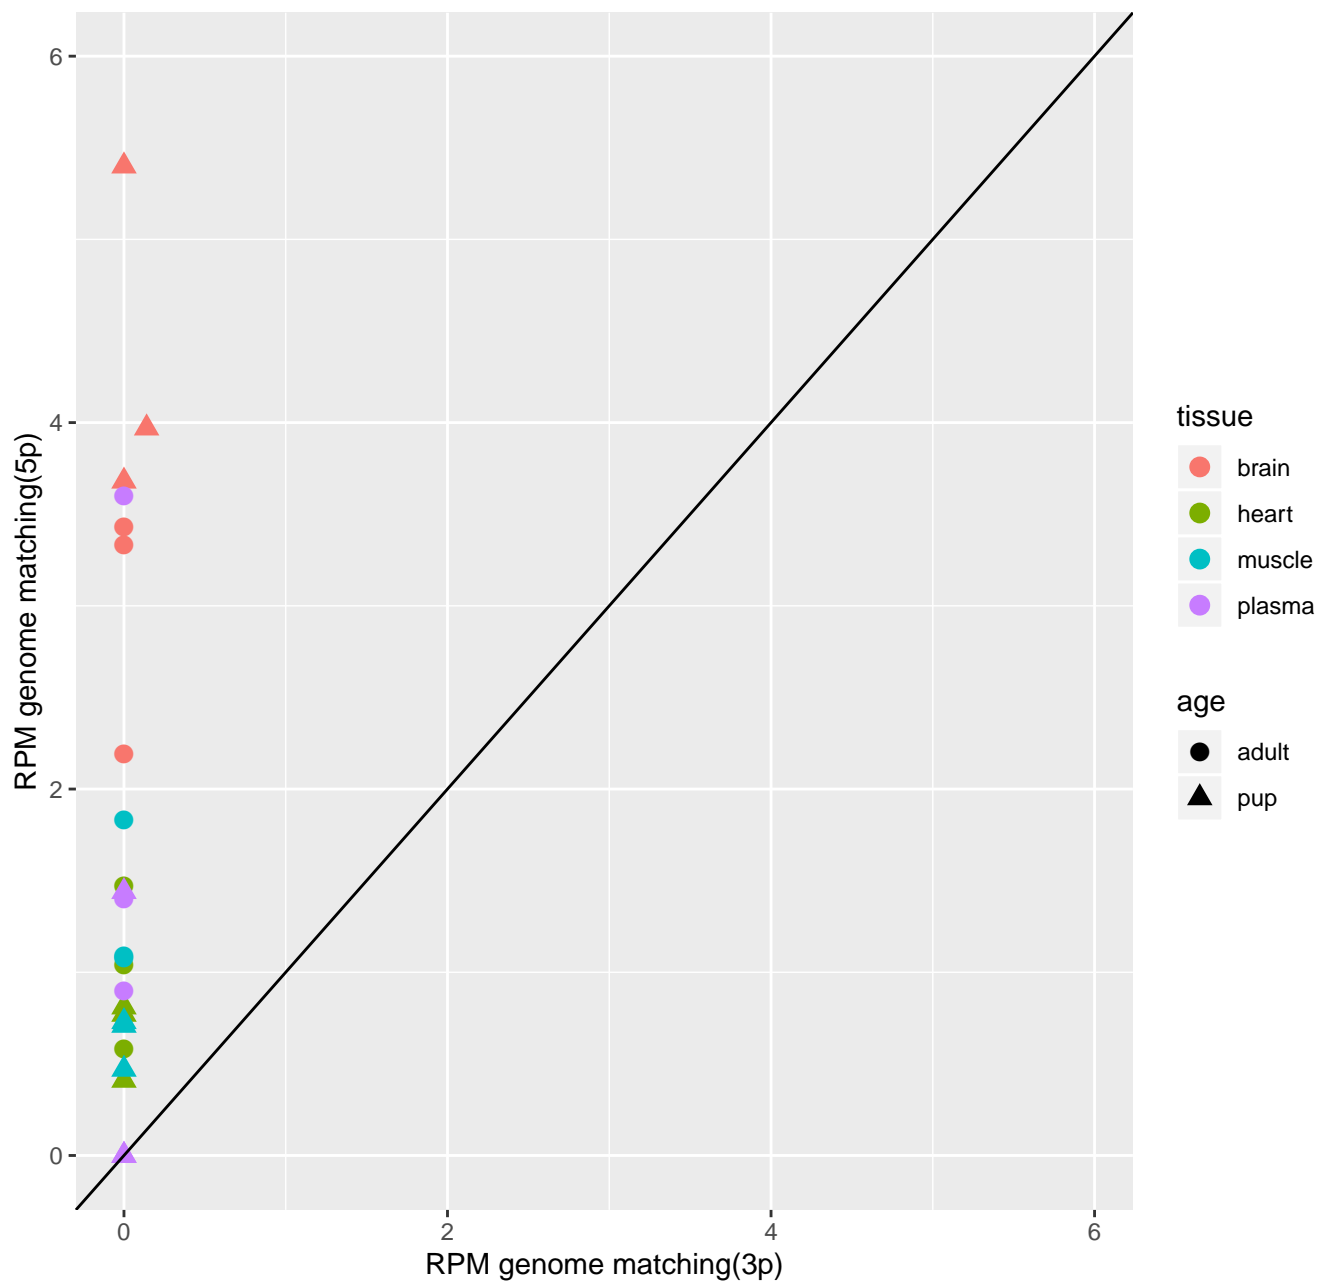



novel\_30

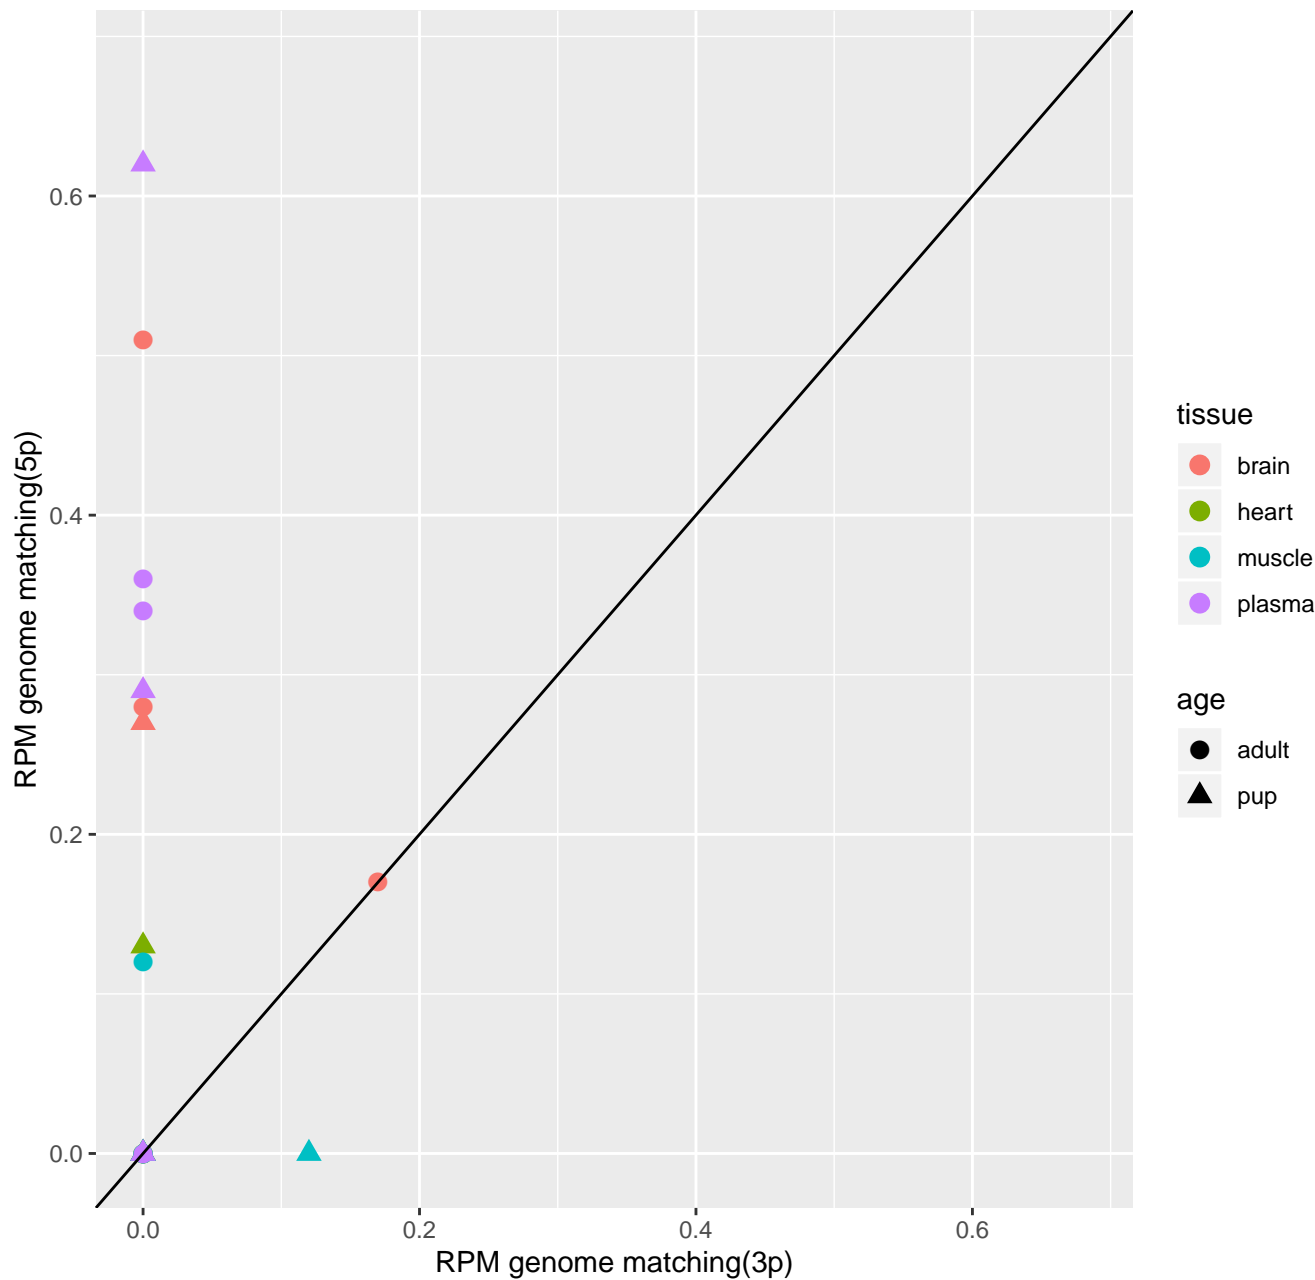



## lwe-miR-7705\_loc1

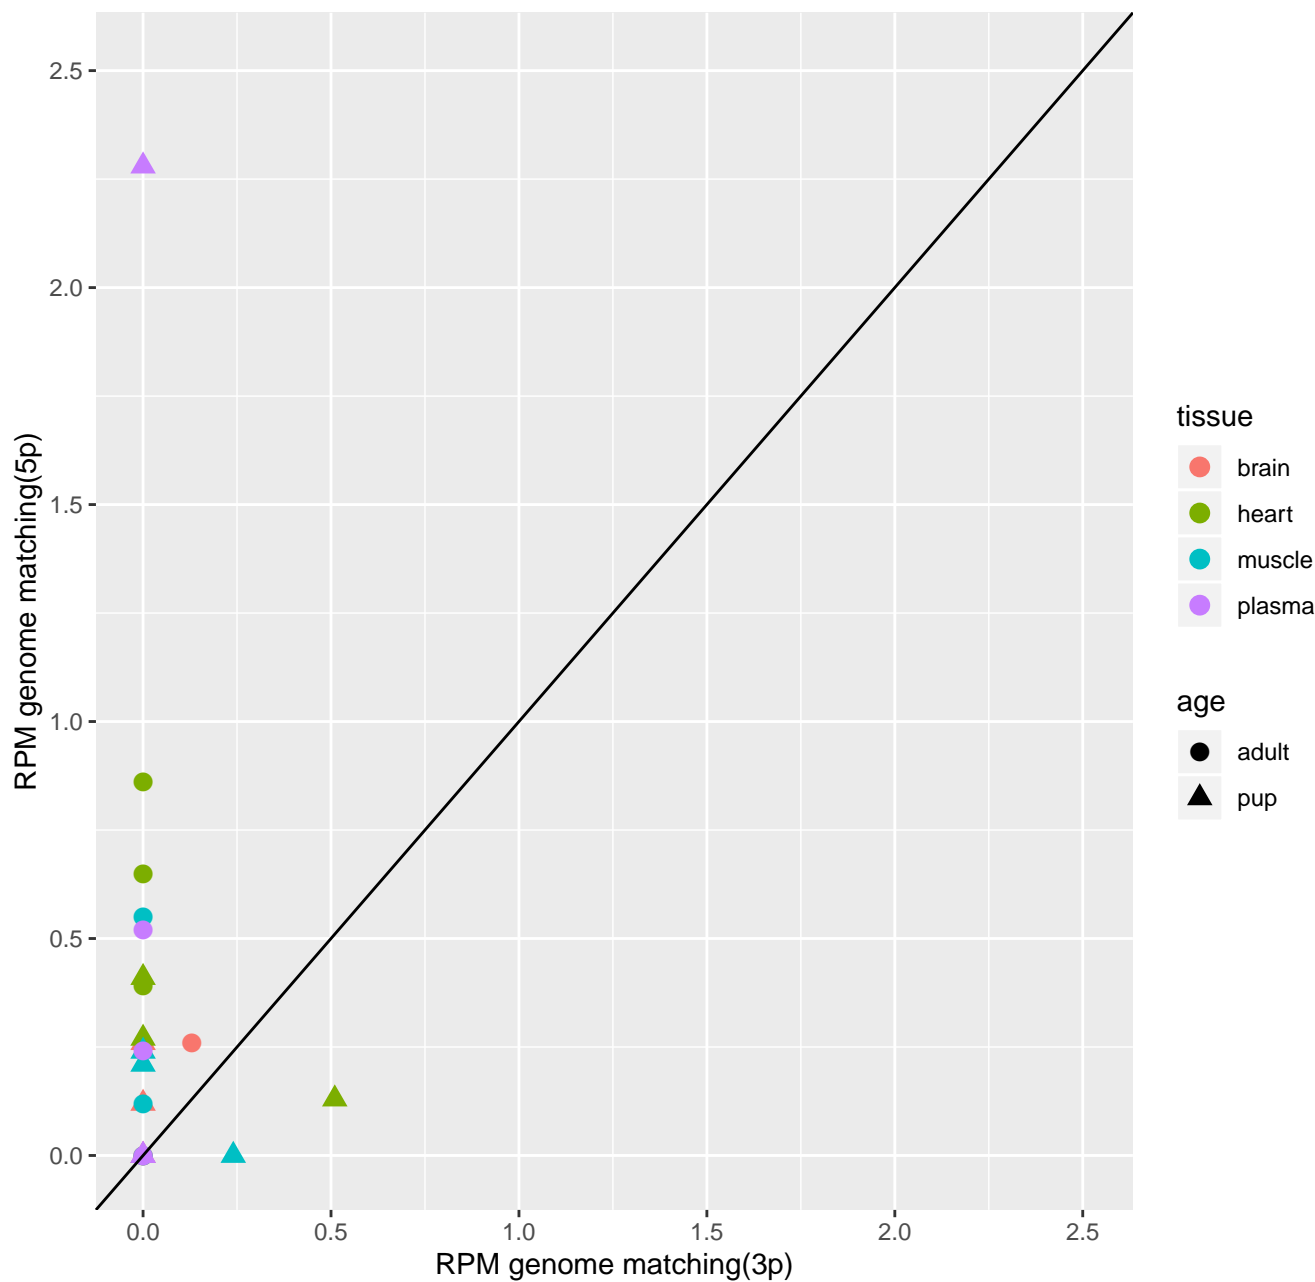

## lwe-miR-653\_loc1

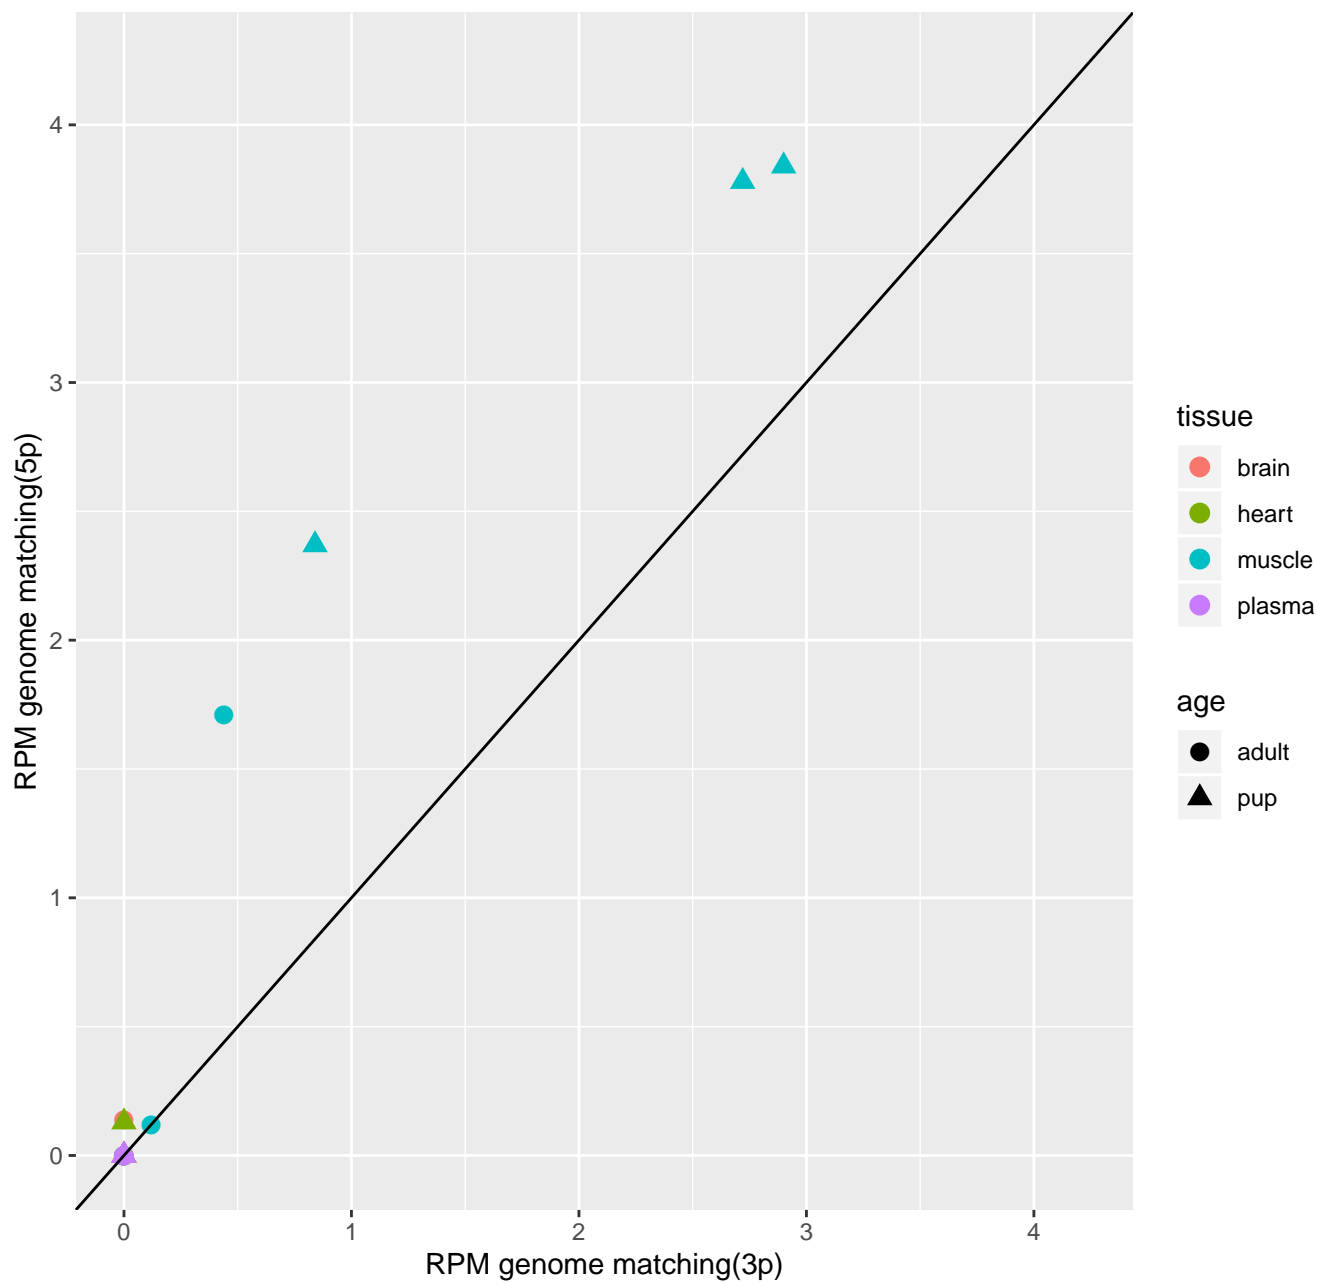

novel\_32

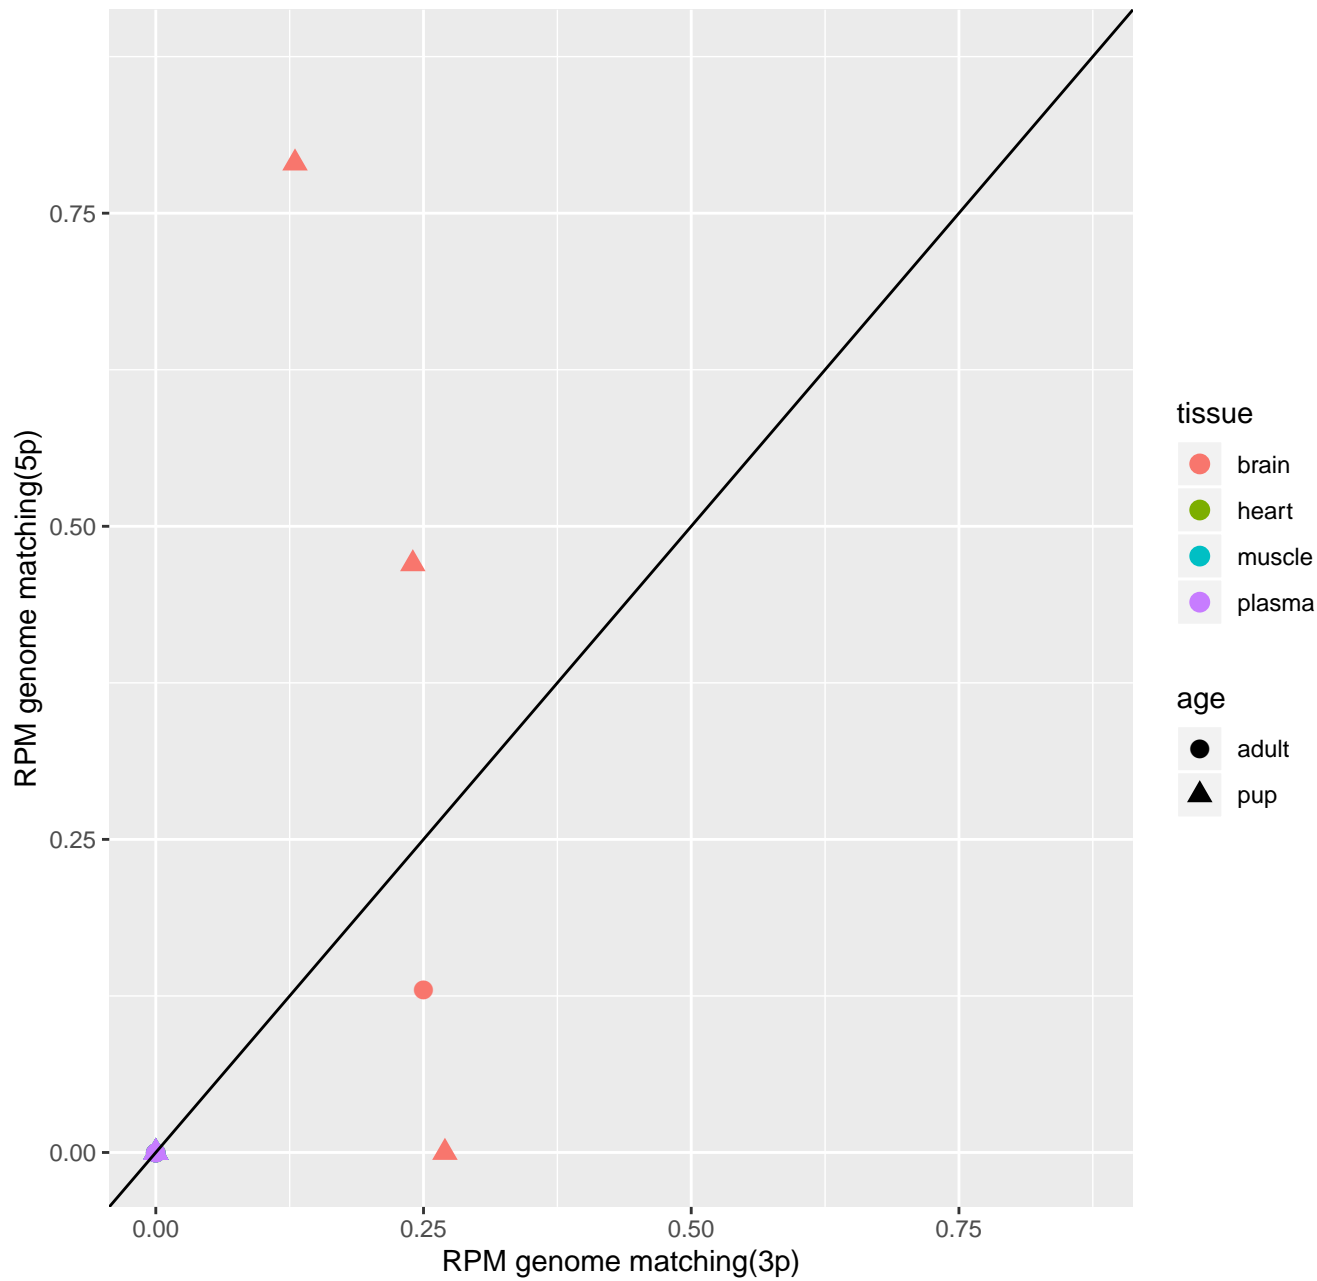

## novel\_33

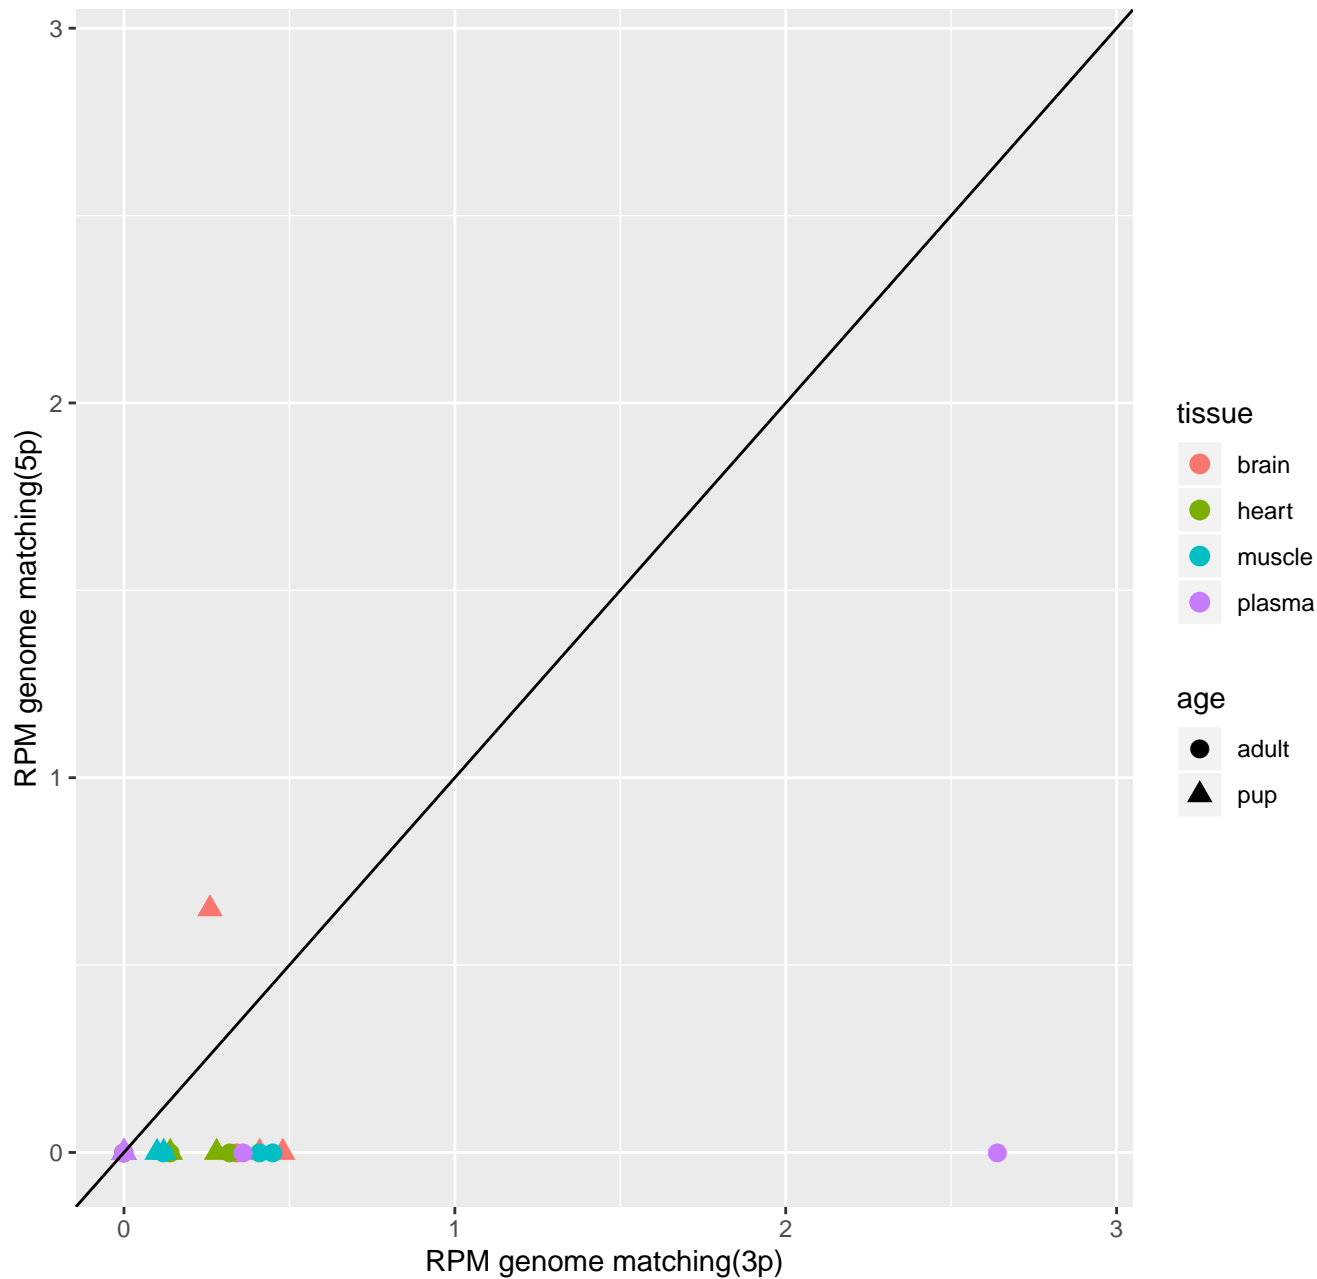

## novel\_34

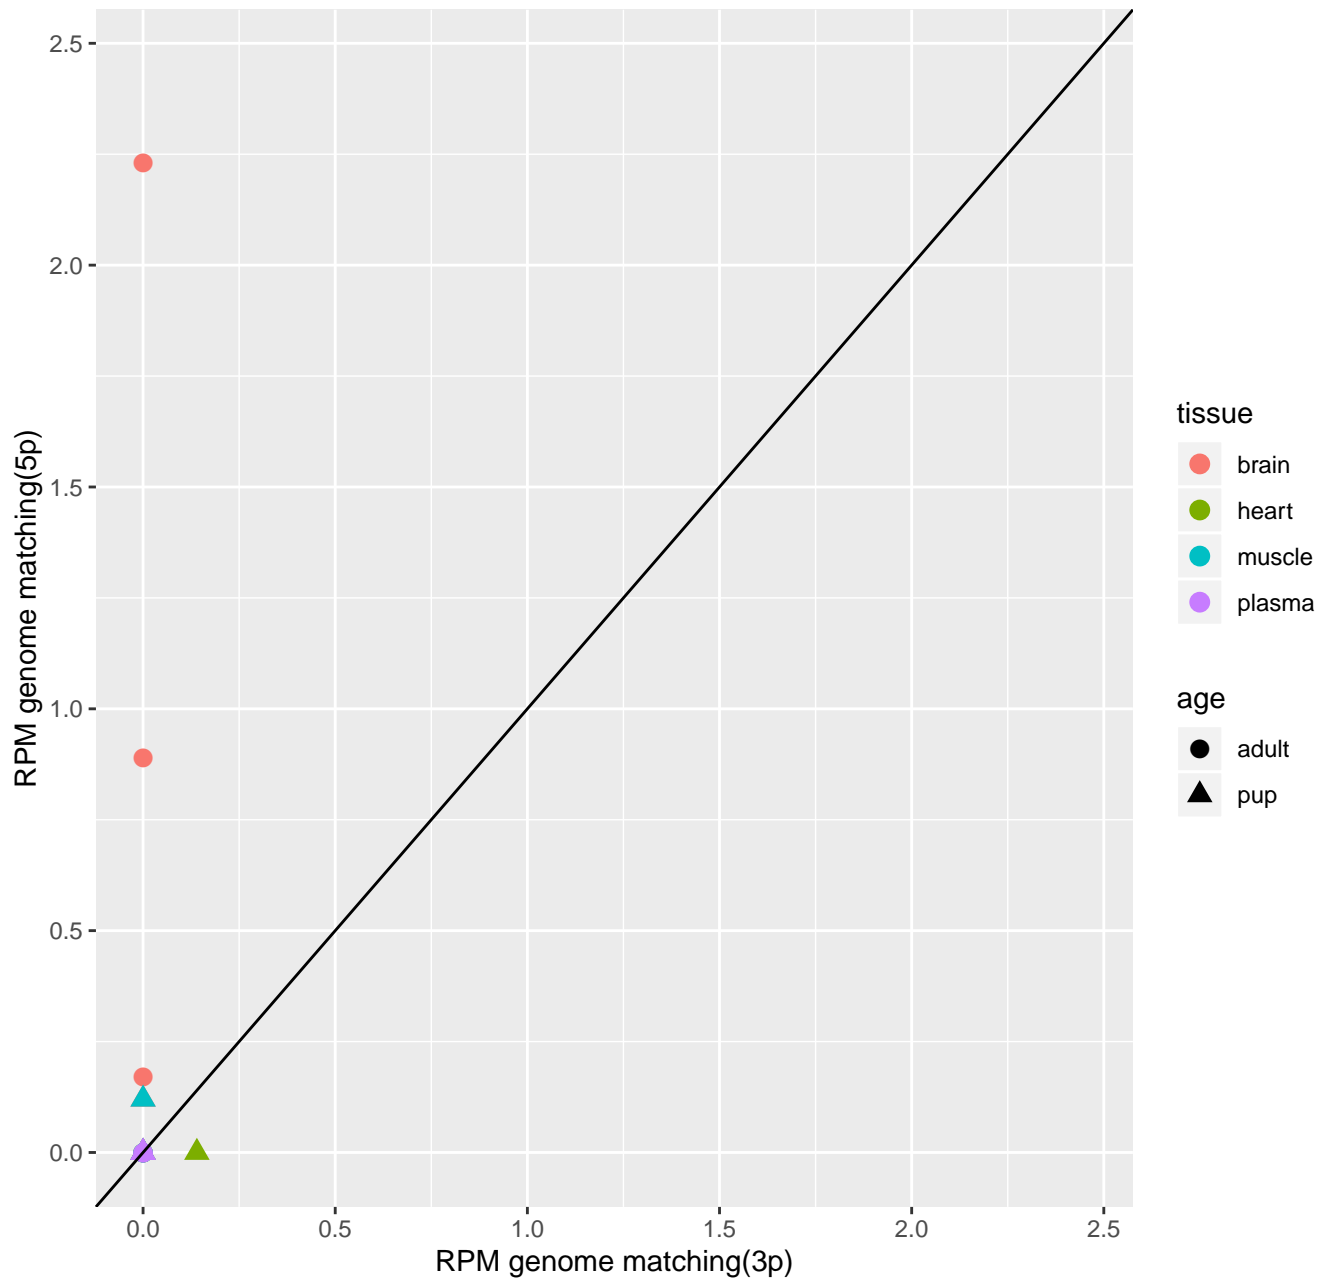

## lwe-miR-133\_loc1

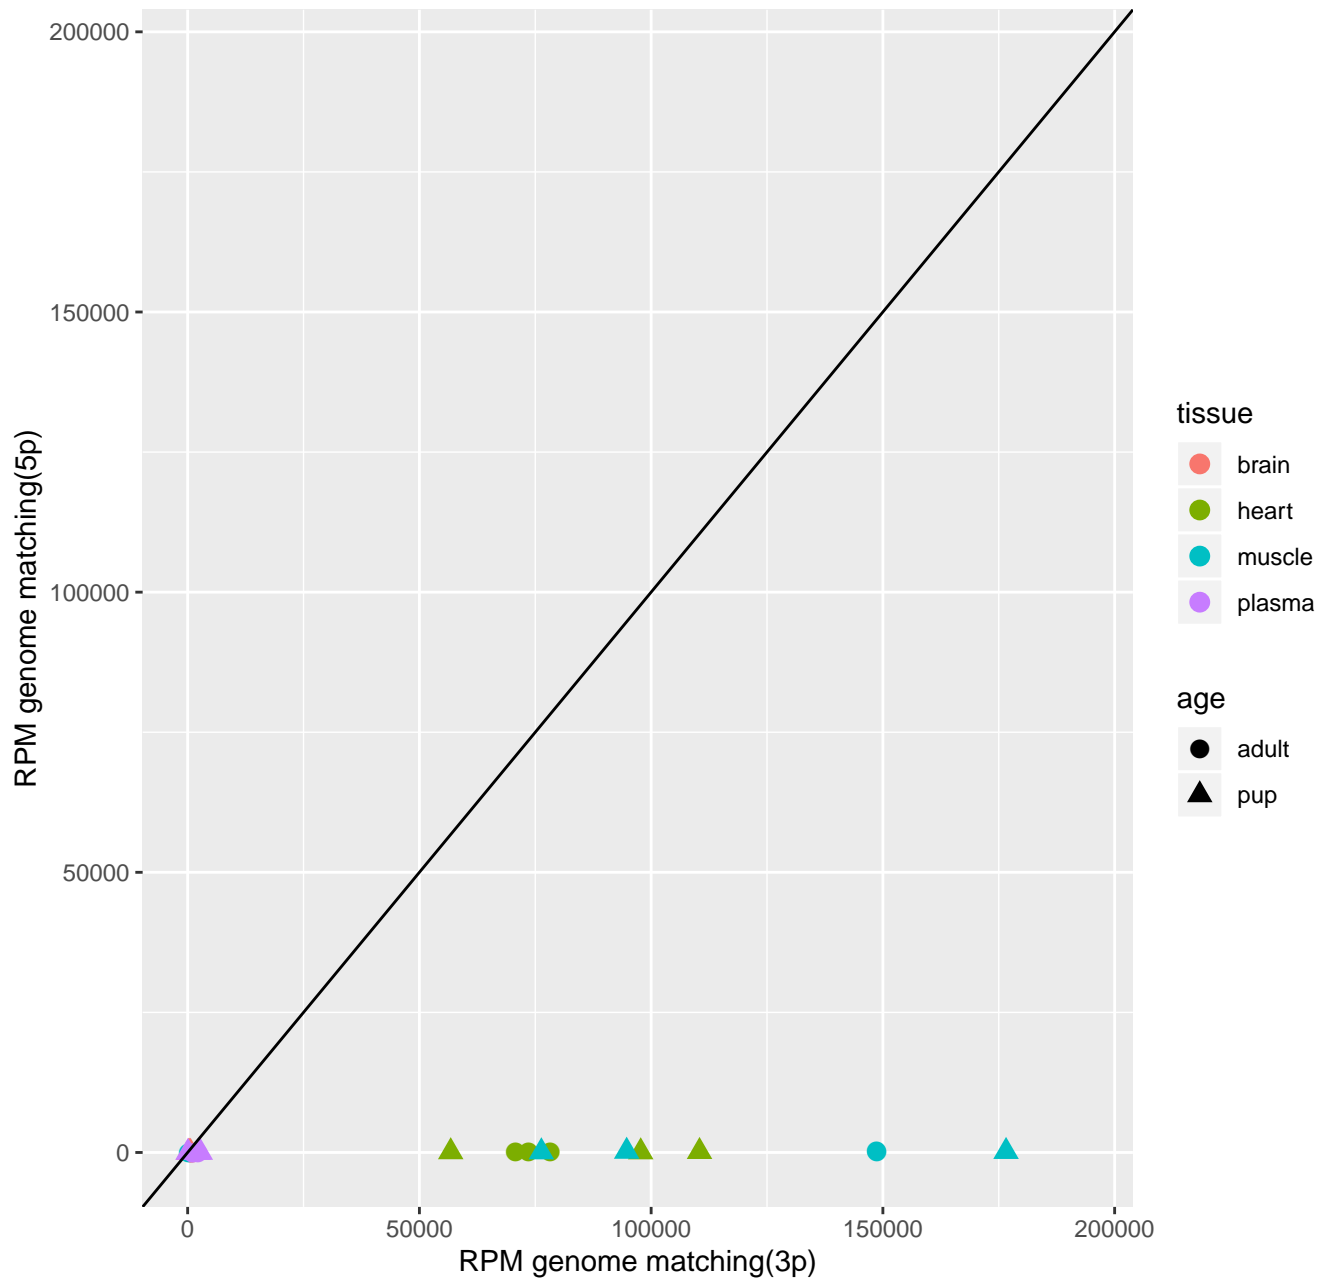

## lwe-miR-1\_loc1

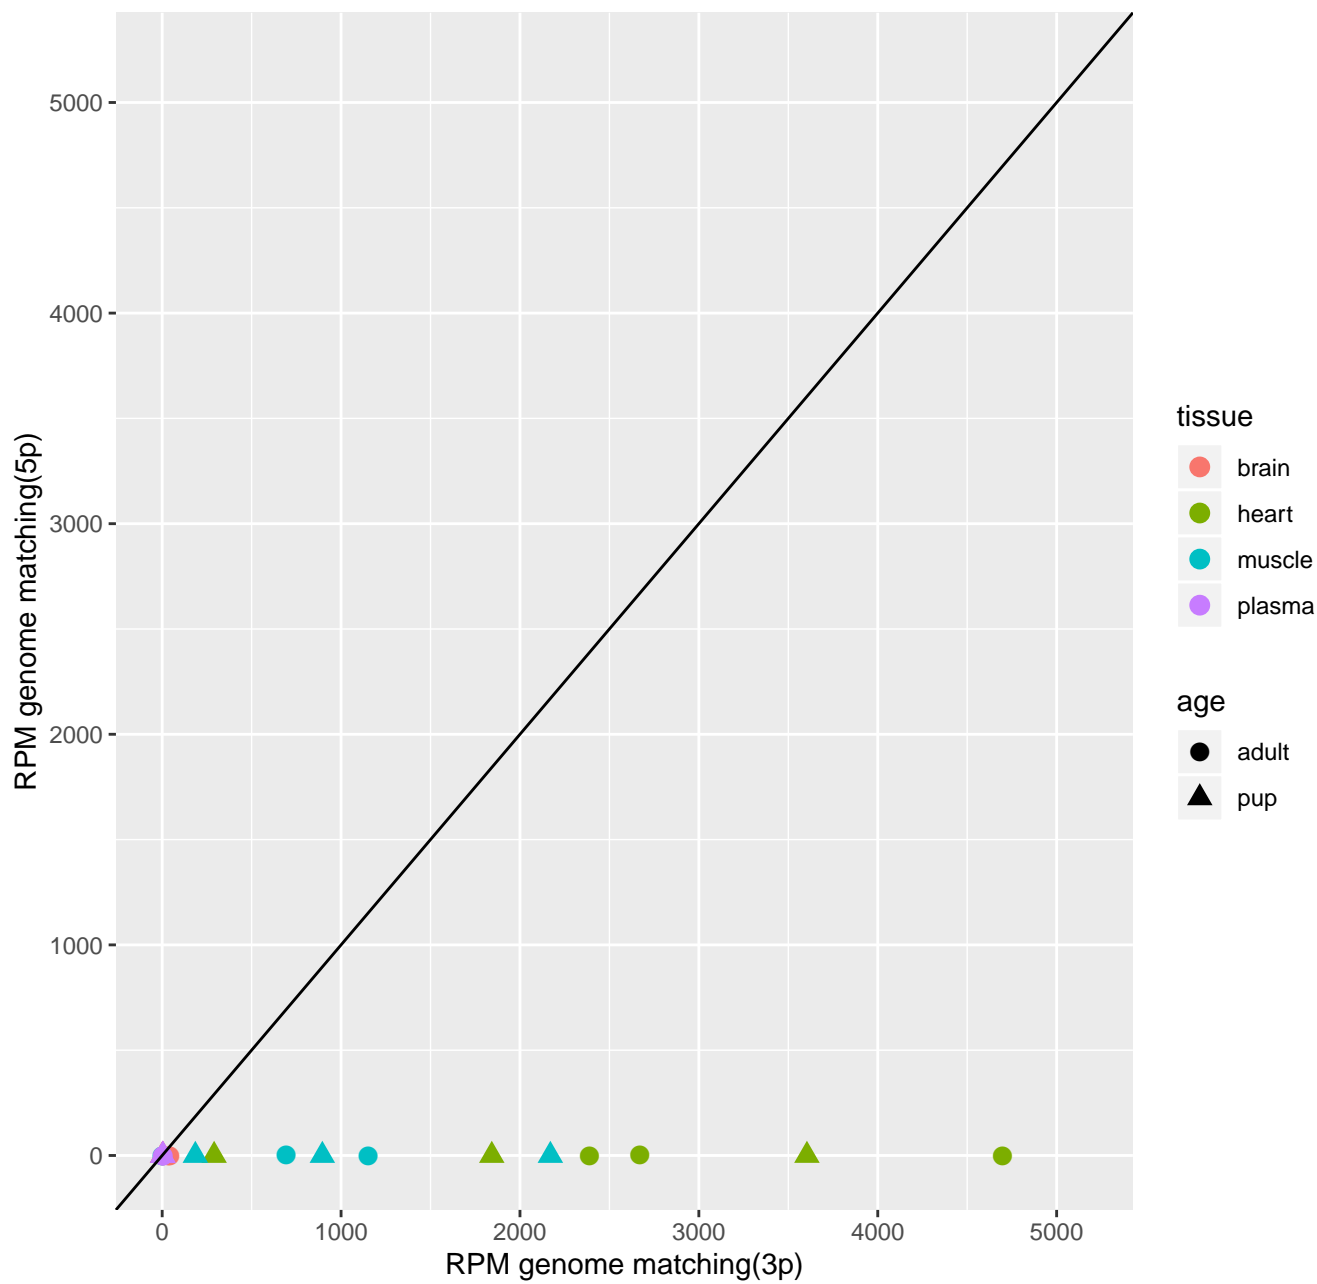





## lwe-miR-744\_loc1

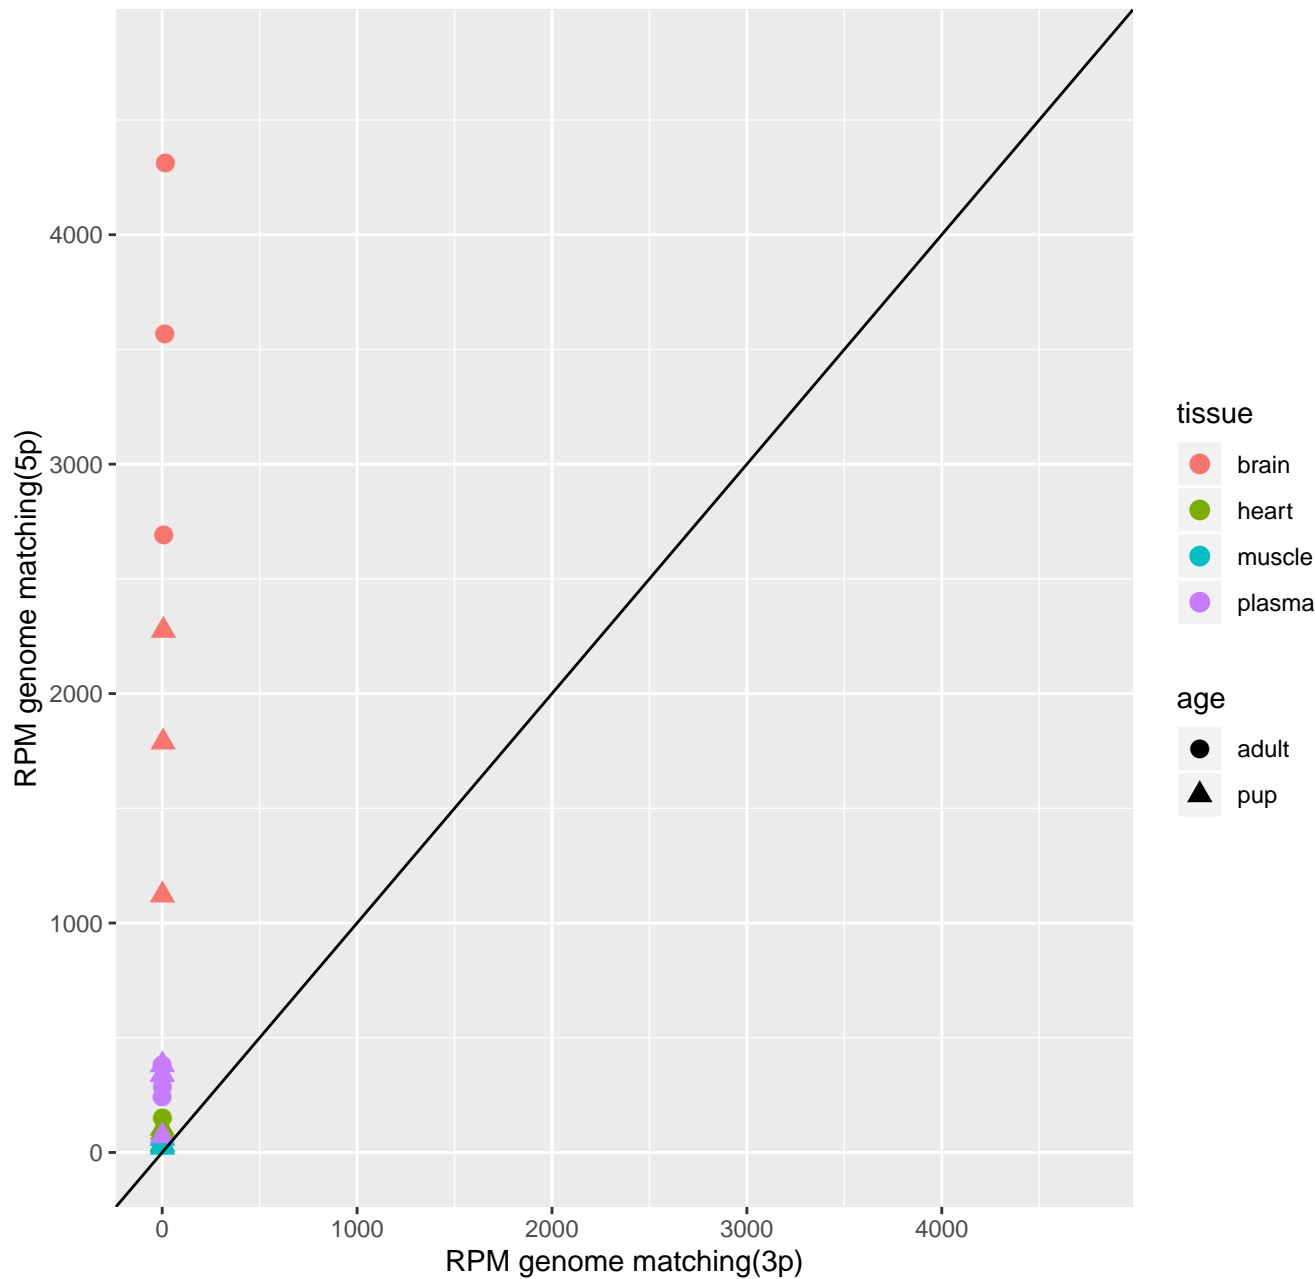

## lwe-miR-9\_loc1

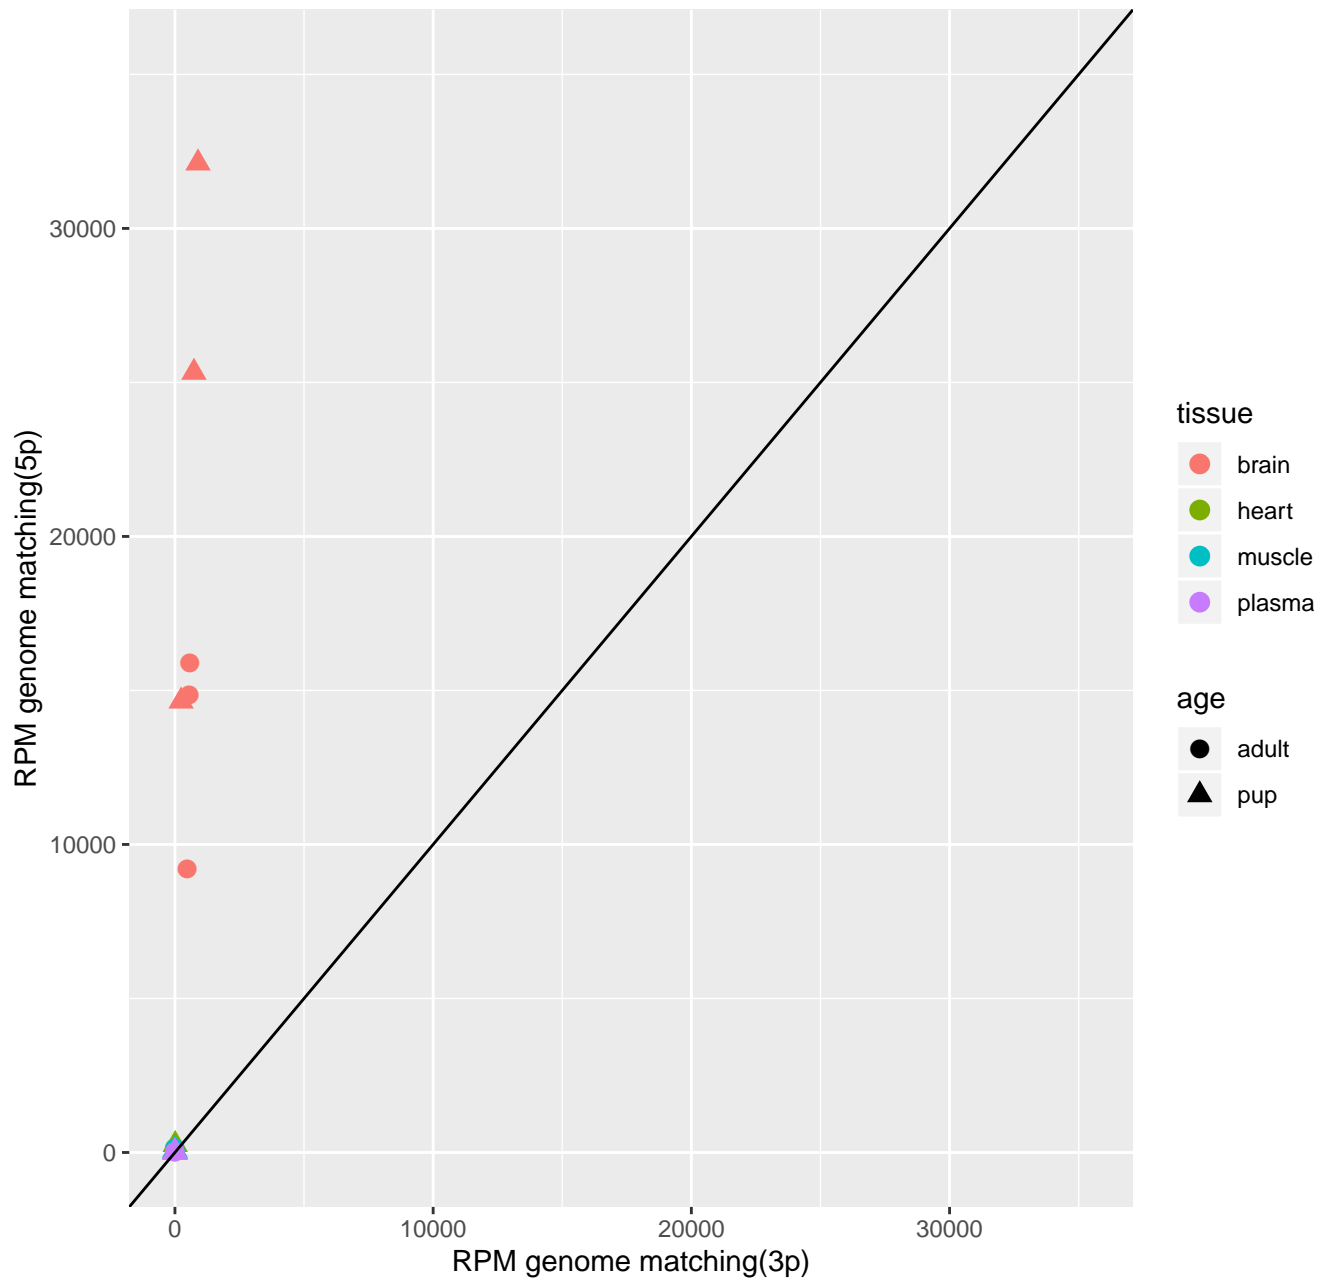

## let-7a\_loc2

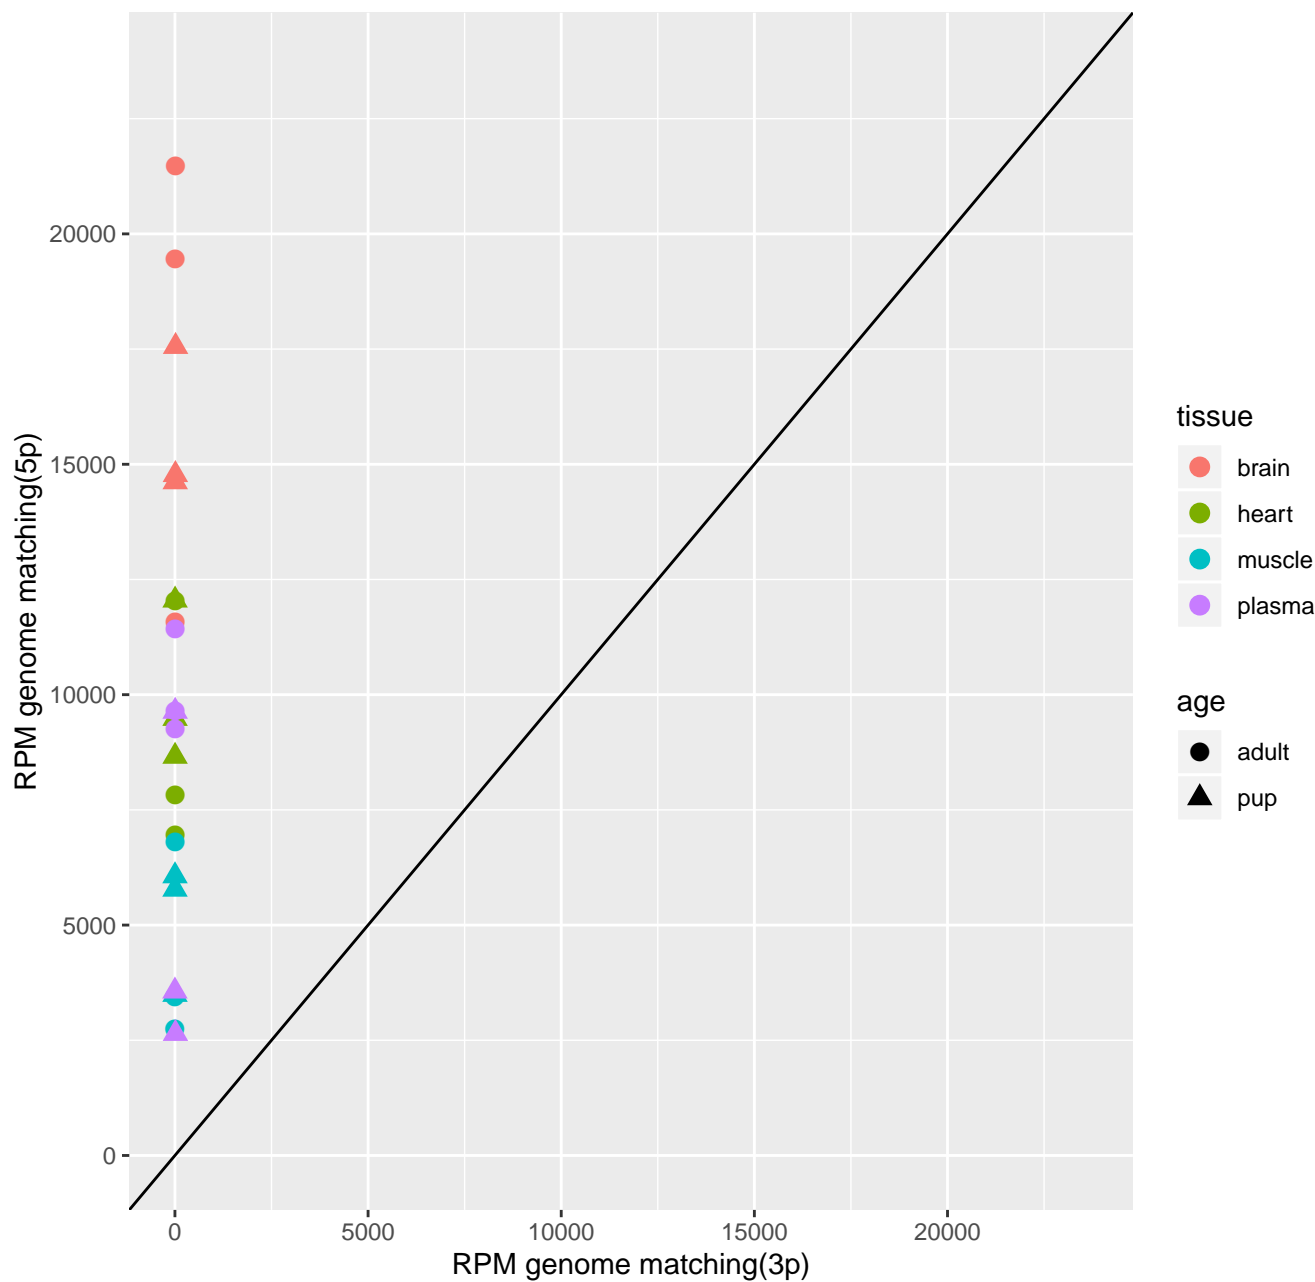

## let-7f\_loc1

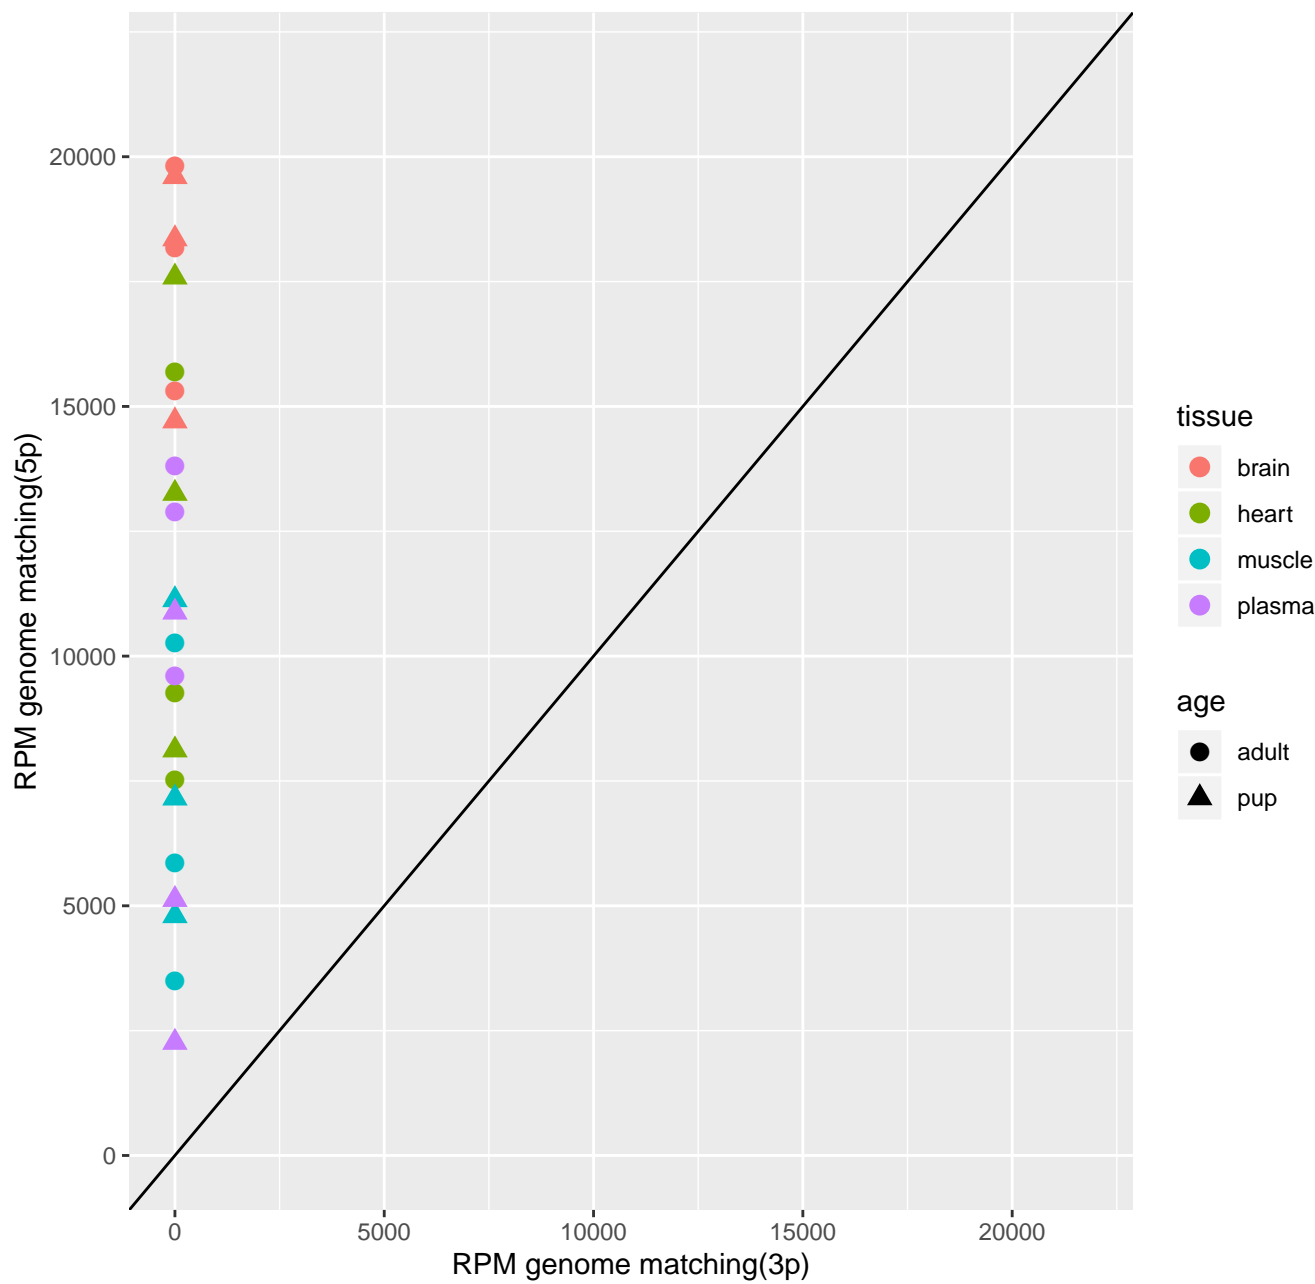

## let-7d\_loc1

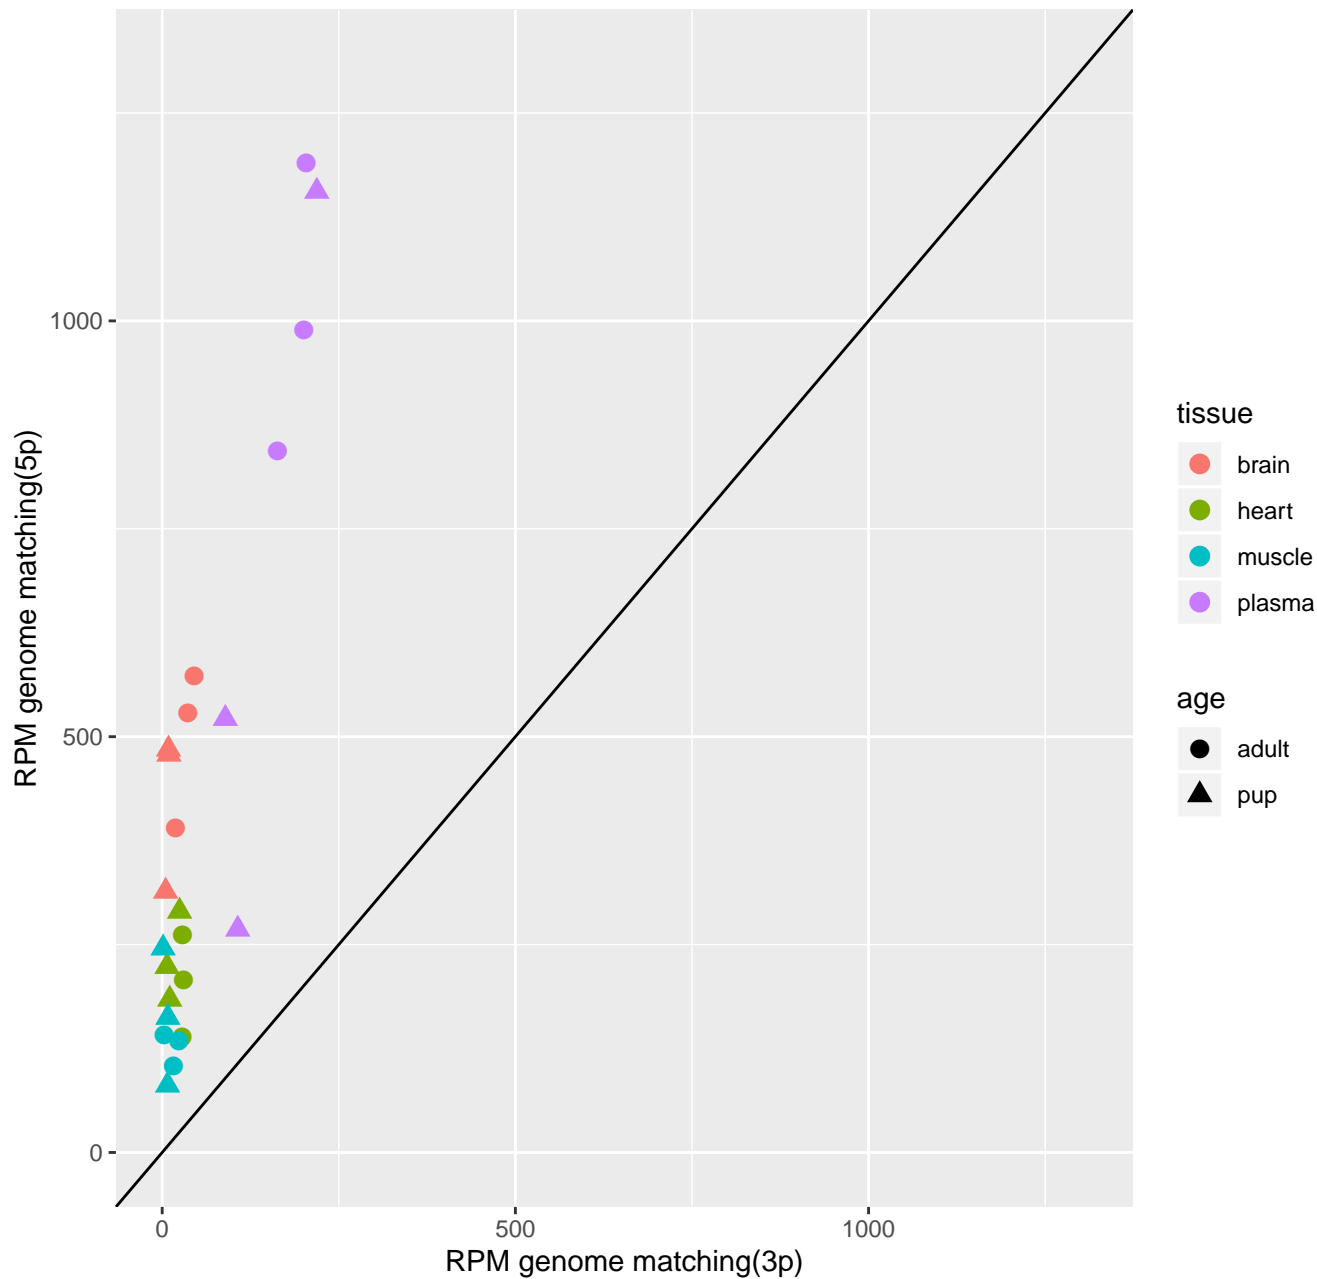

## novel\_35

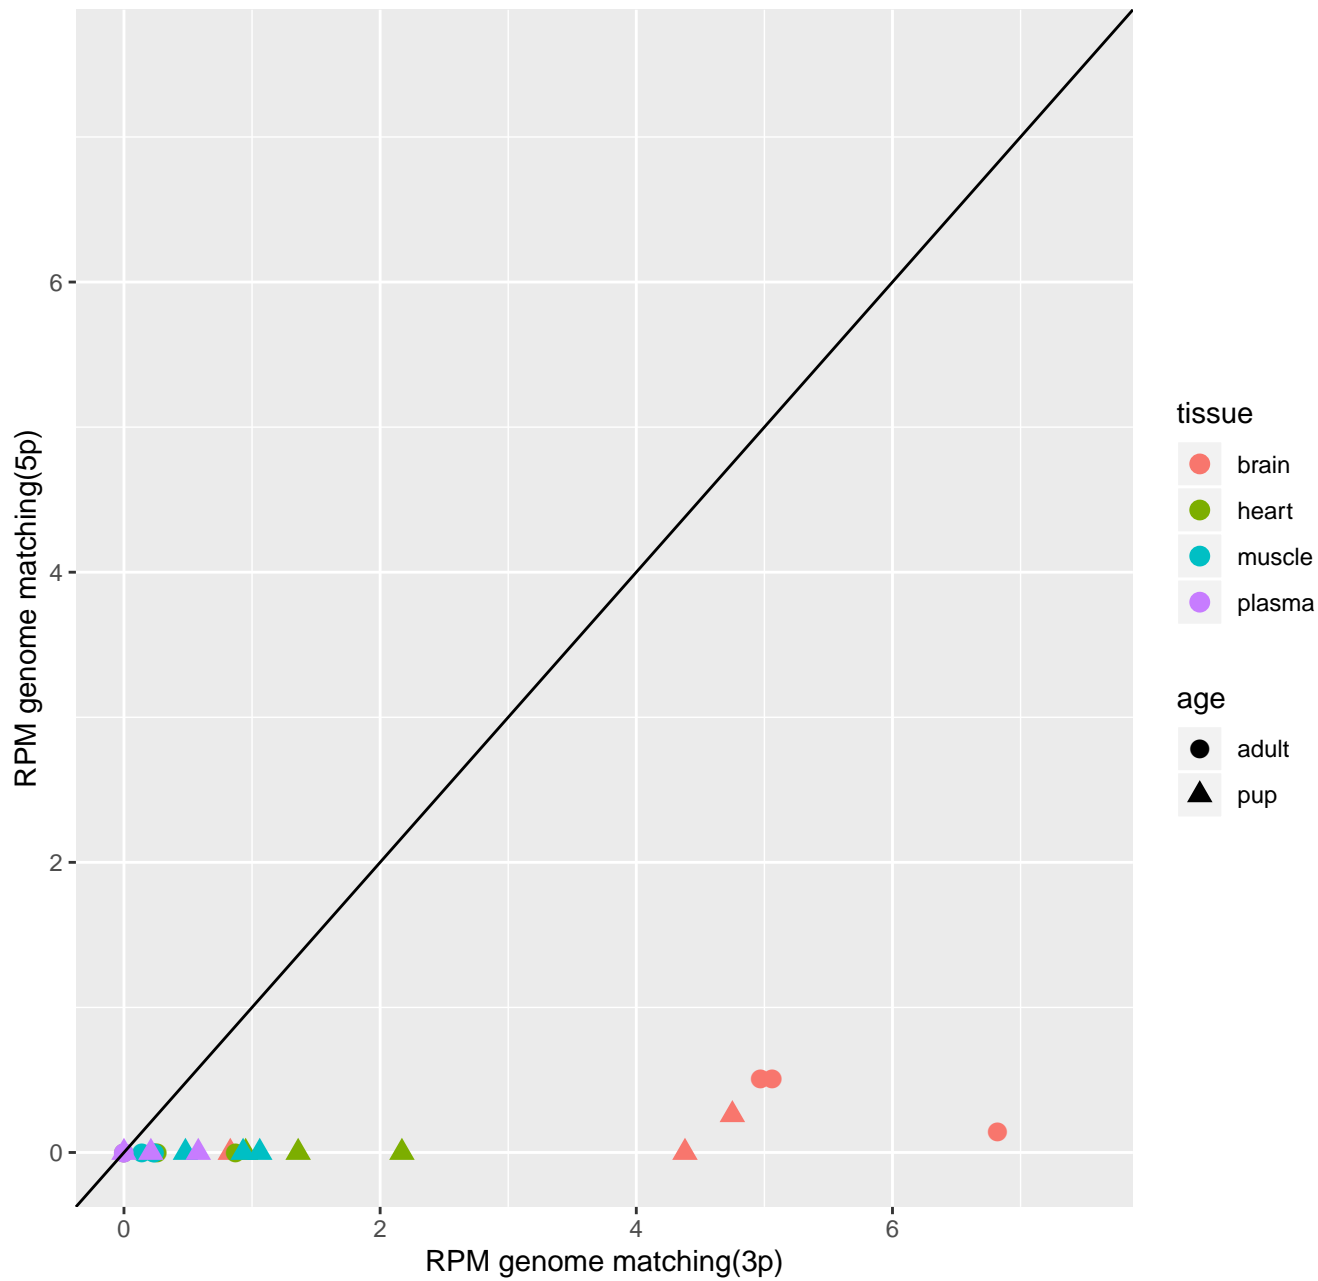

## novel\_36

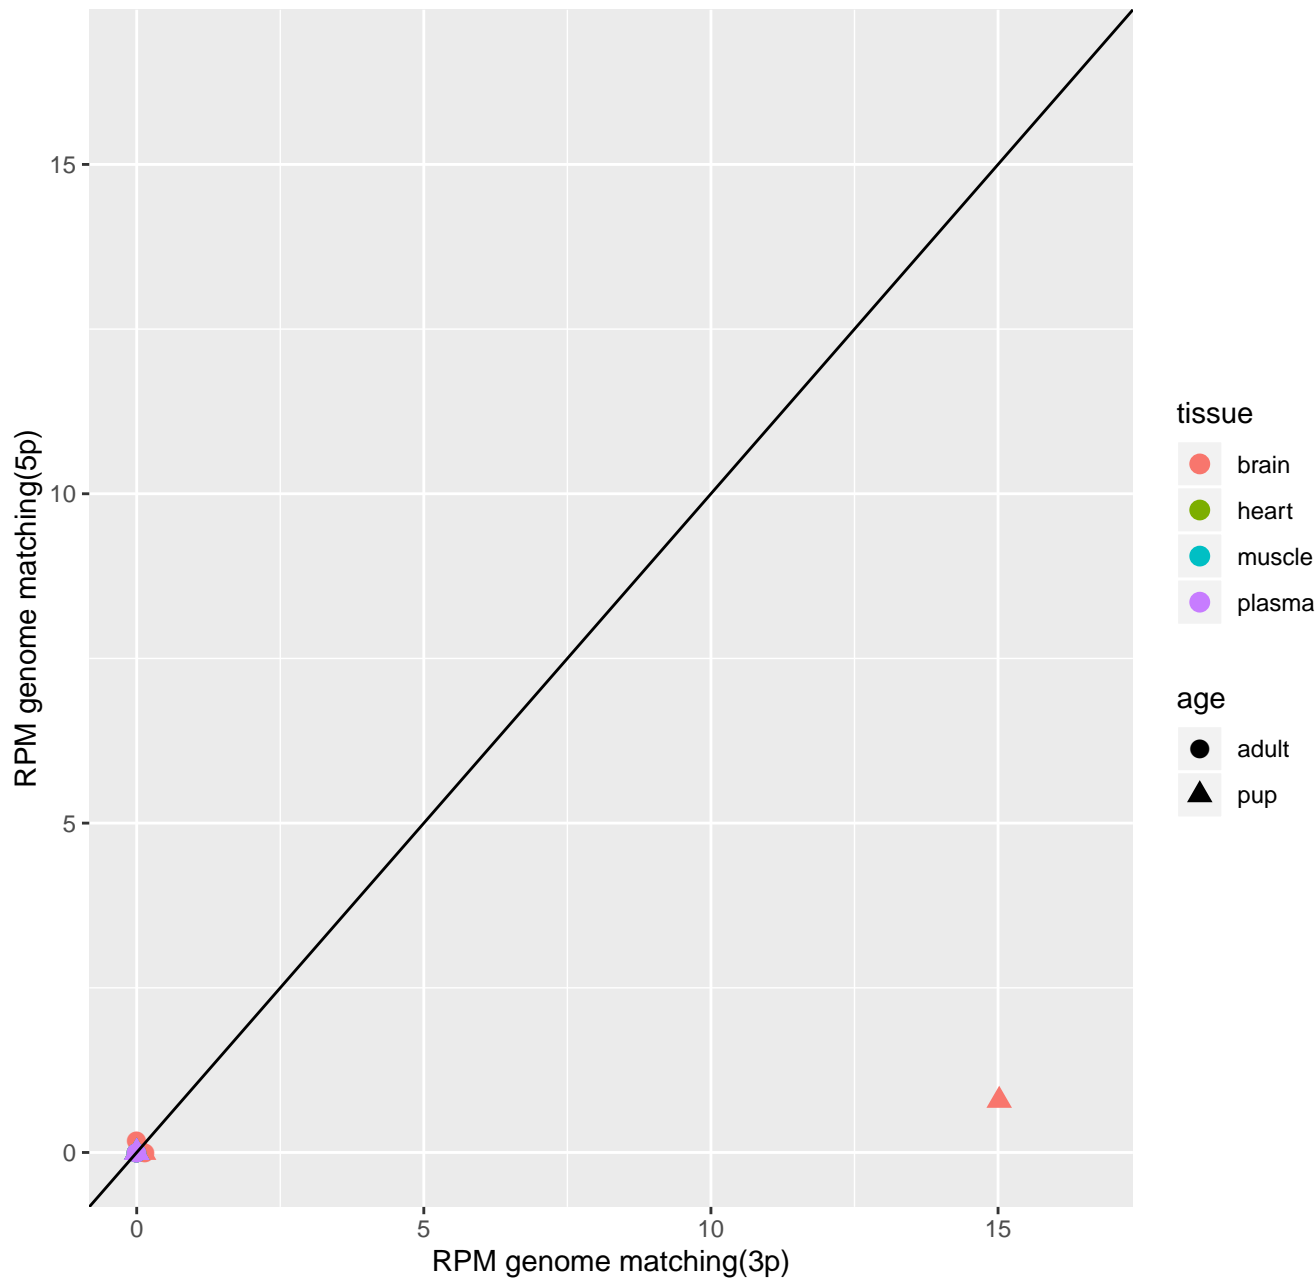

## lwe-miR-374a\_loc1

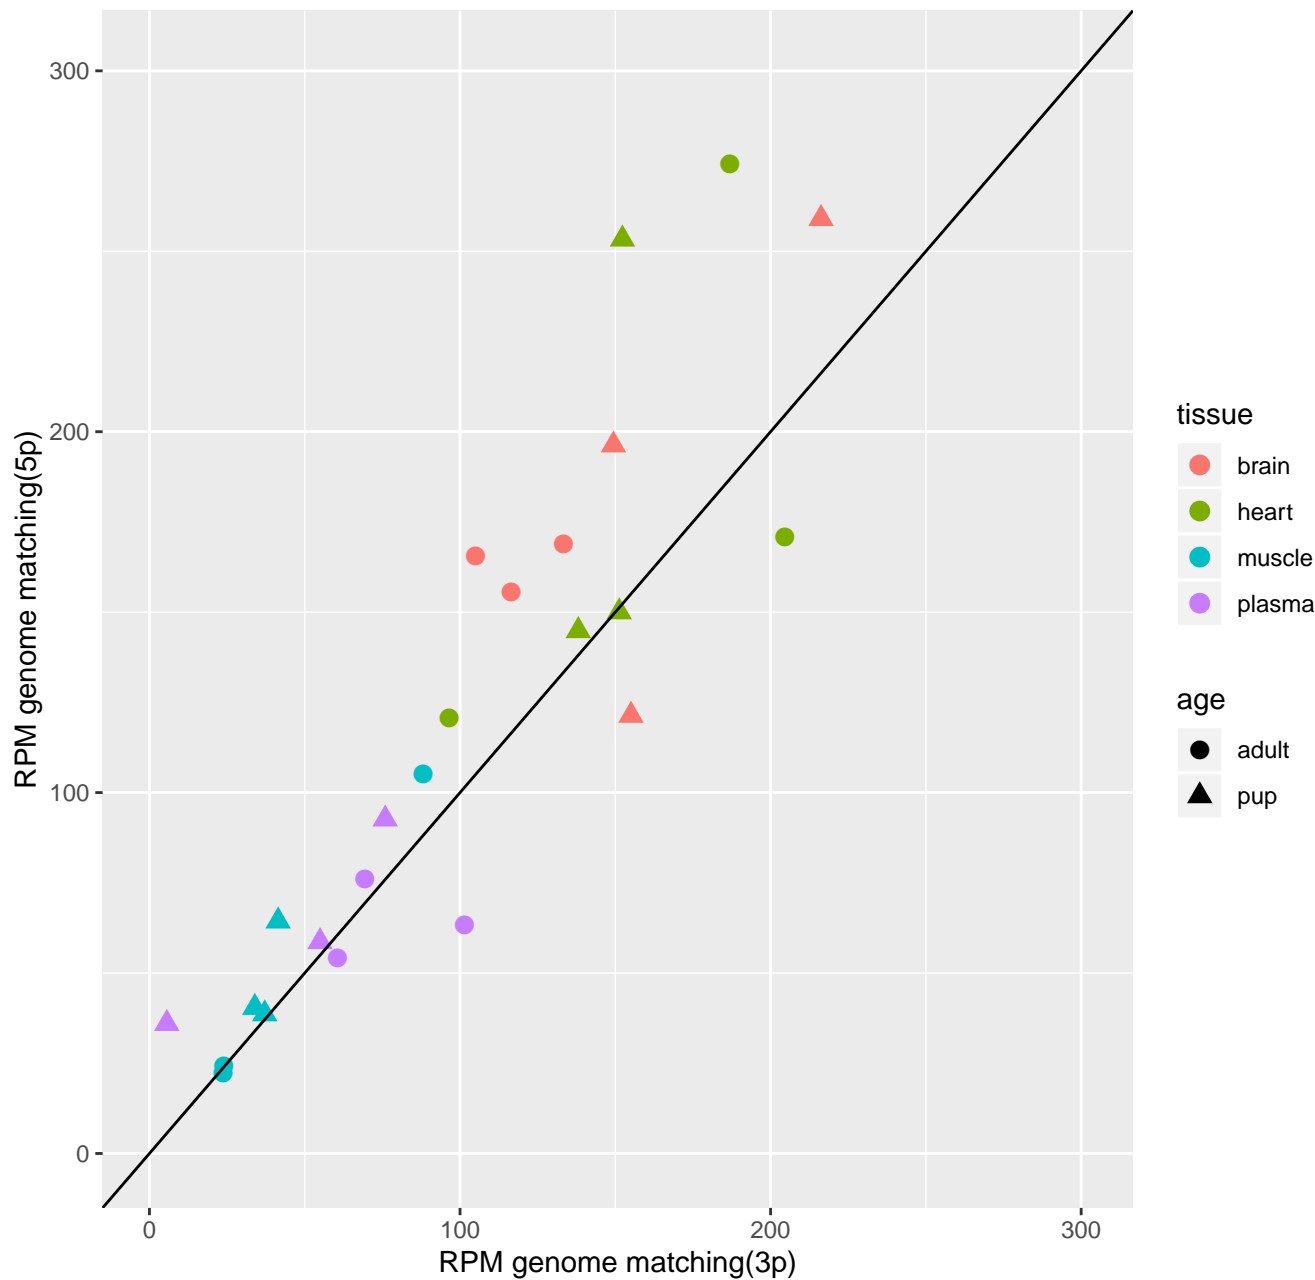







novel\_37

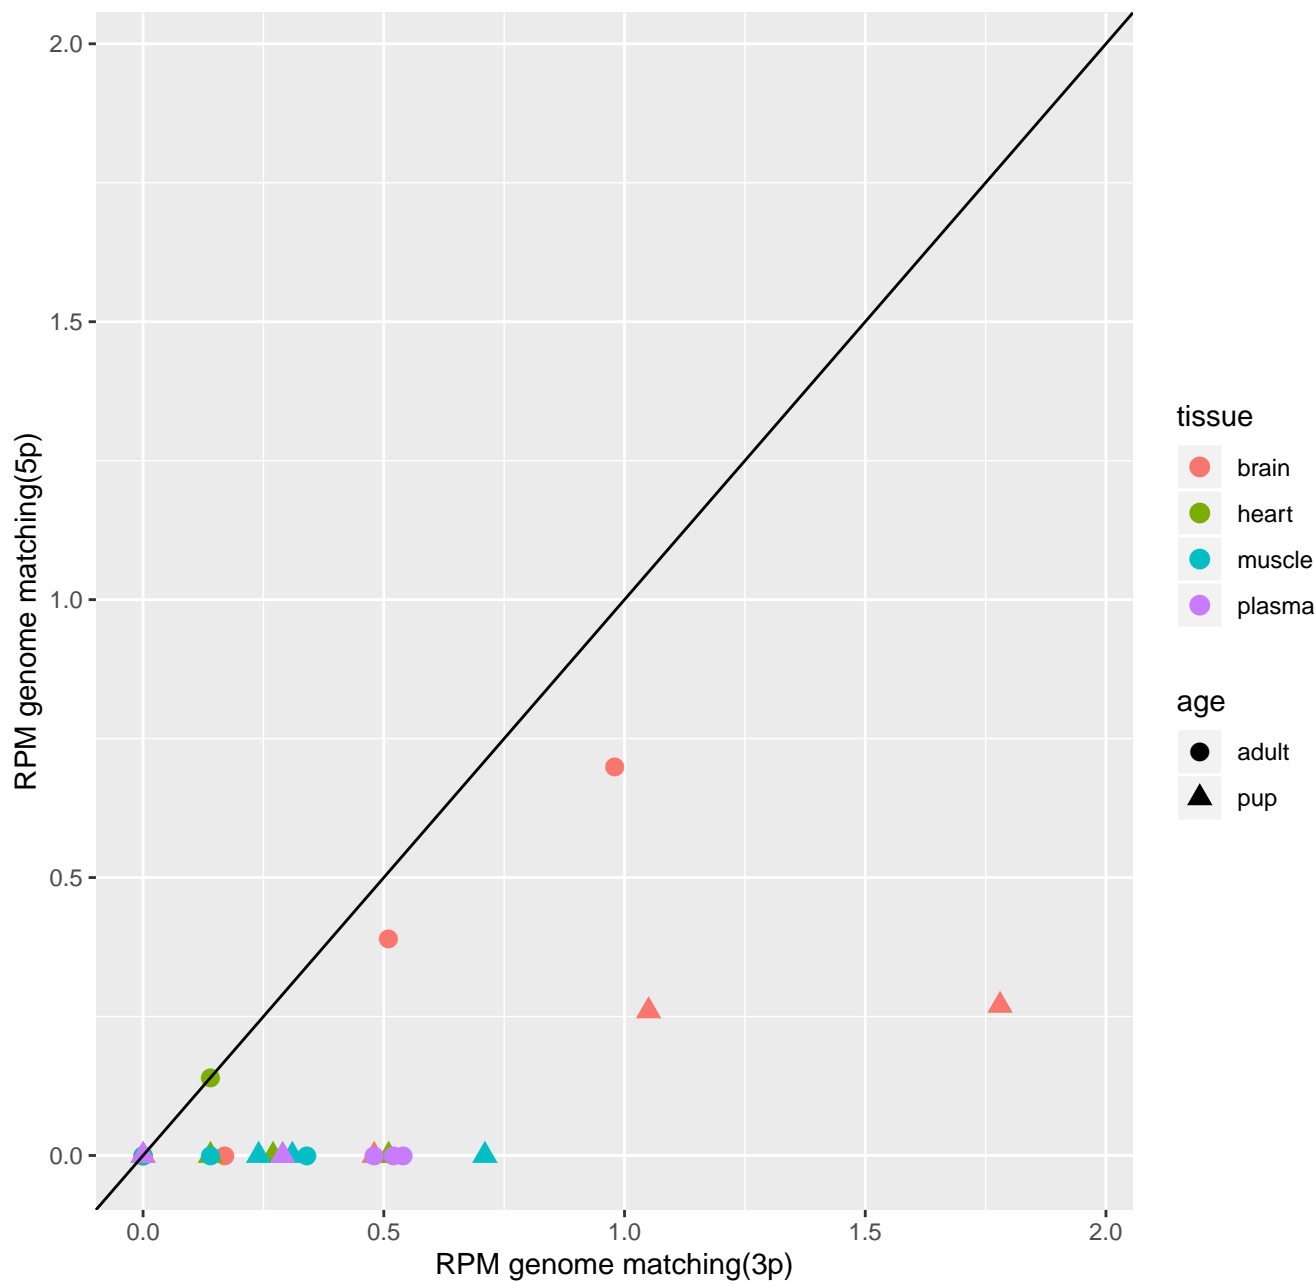

novel\_38

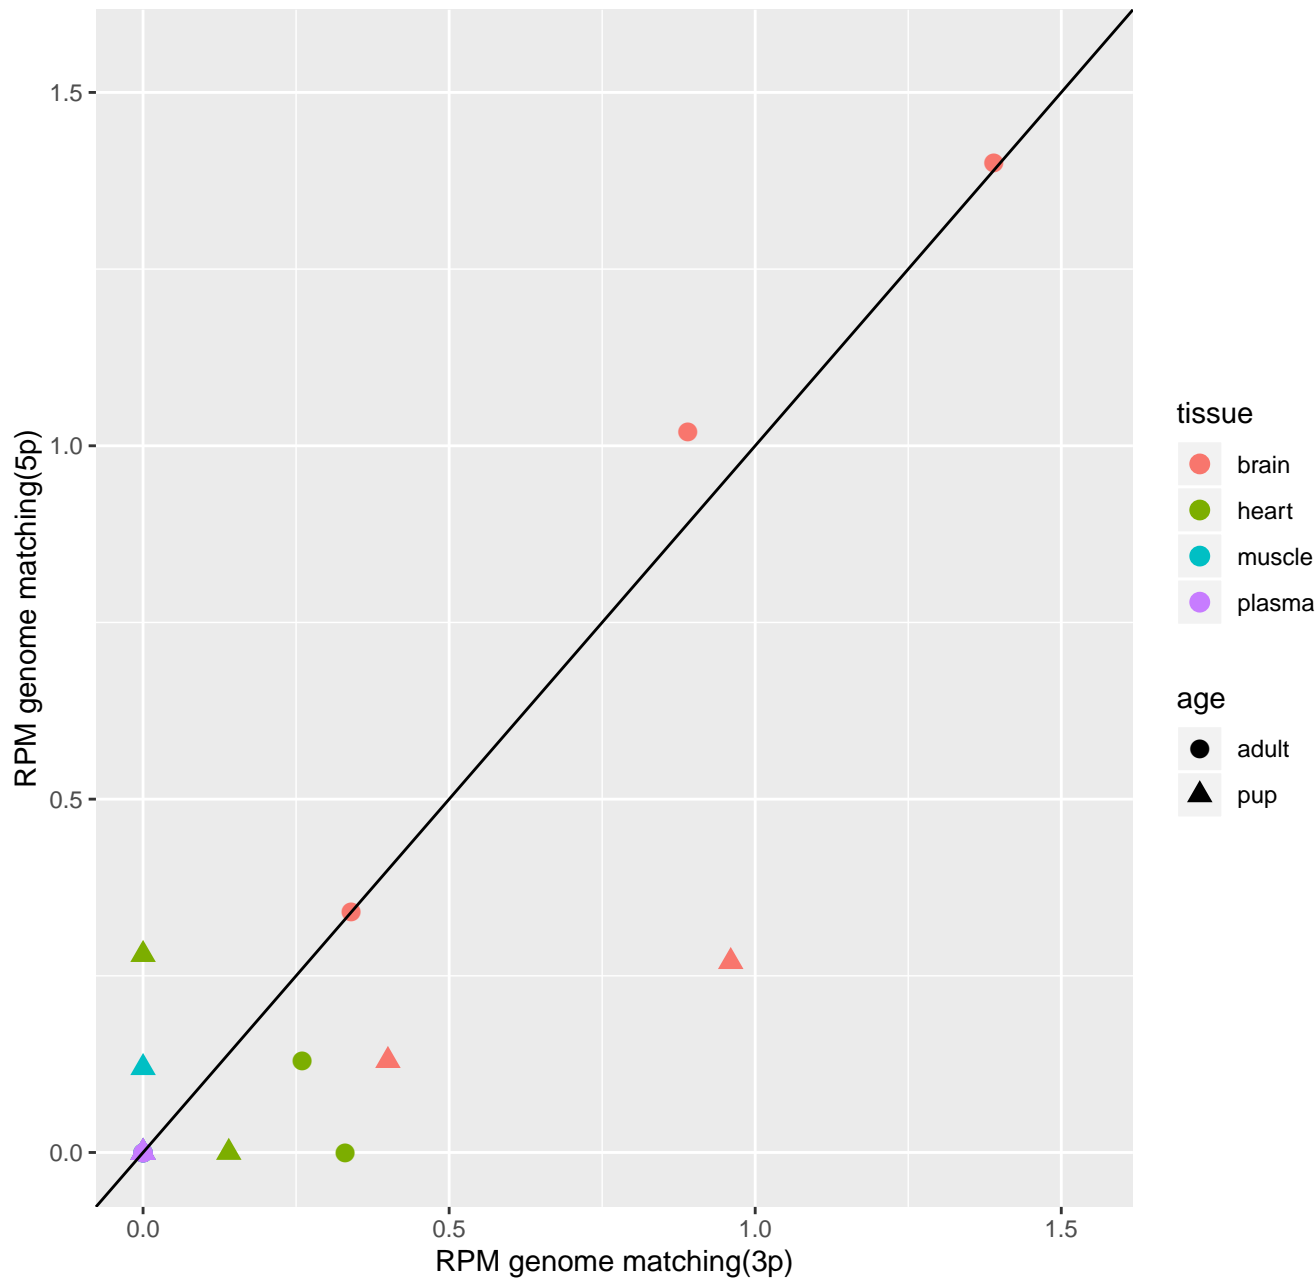

## lwe-miR-155a\_loc1

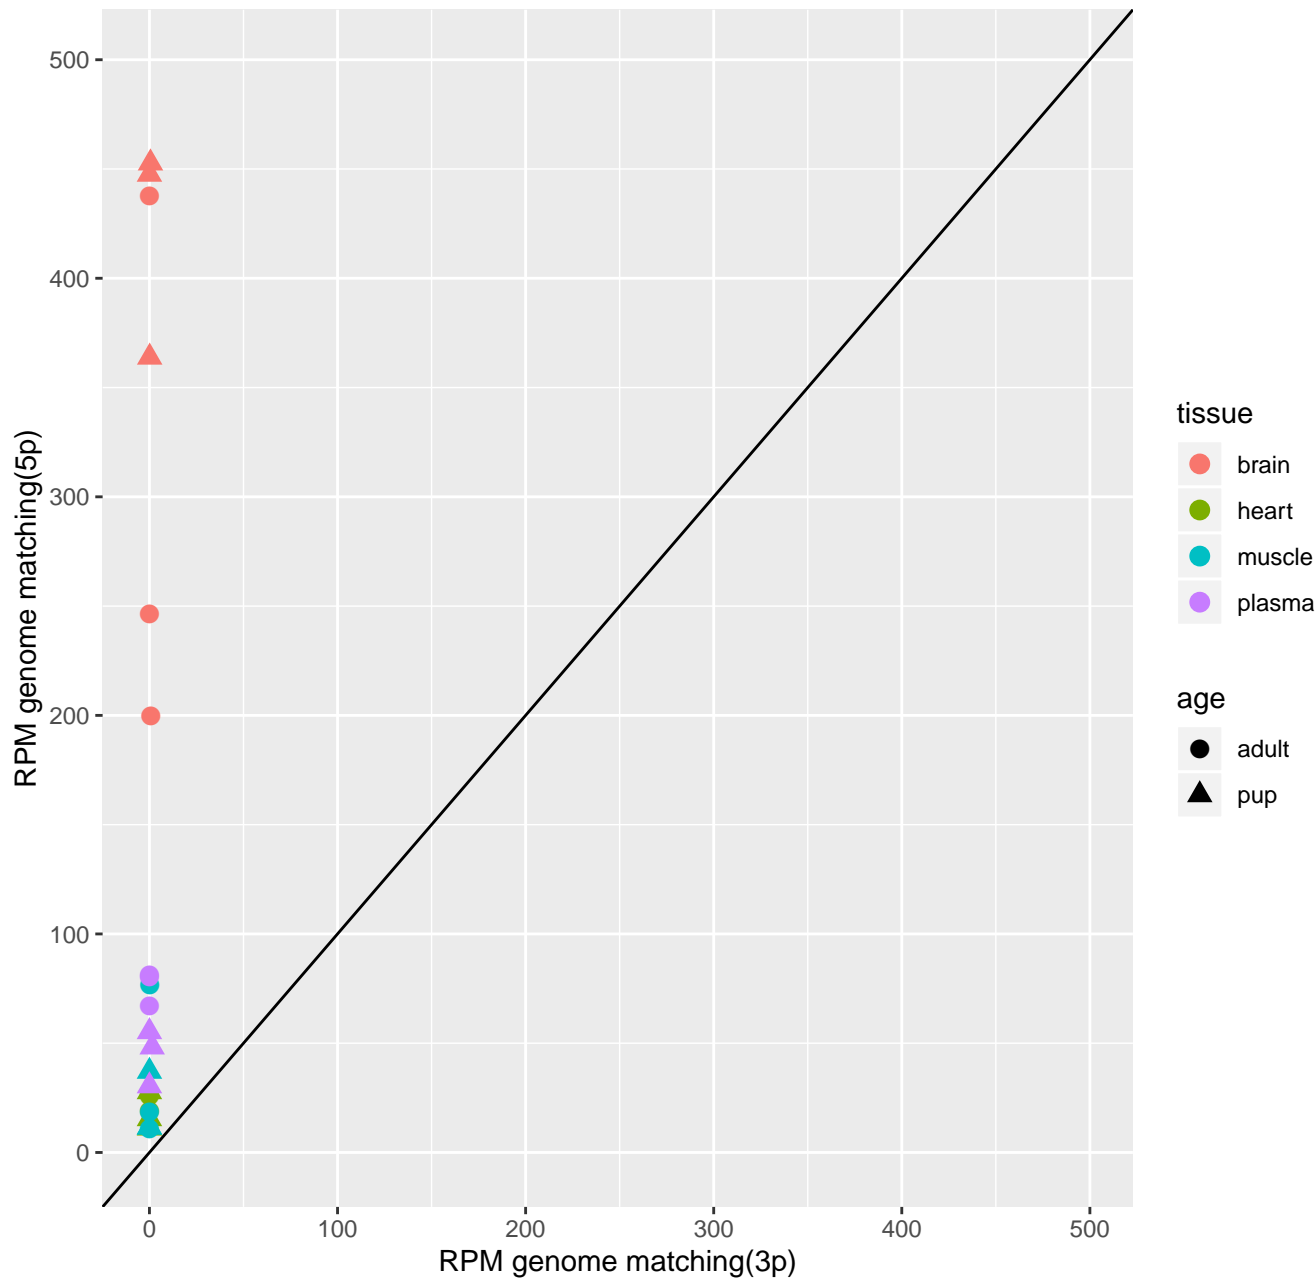

novel\_39

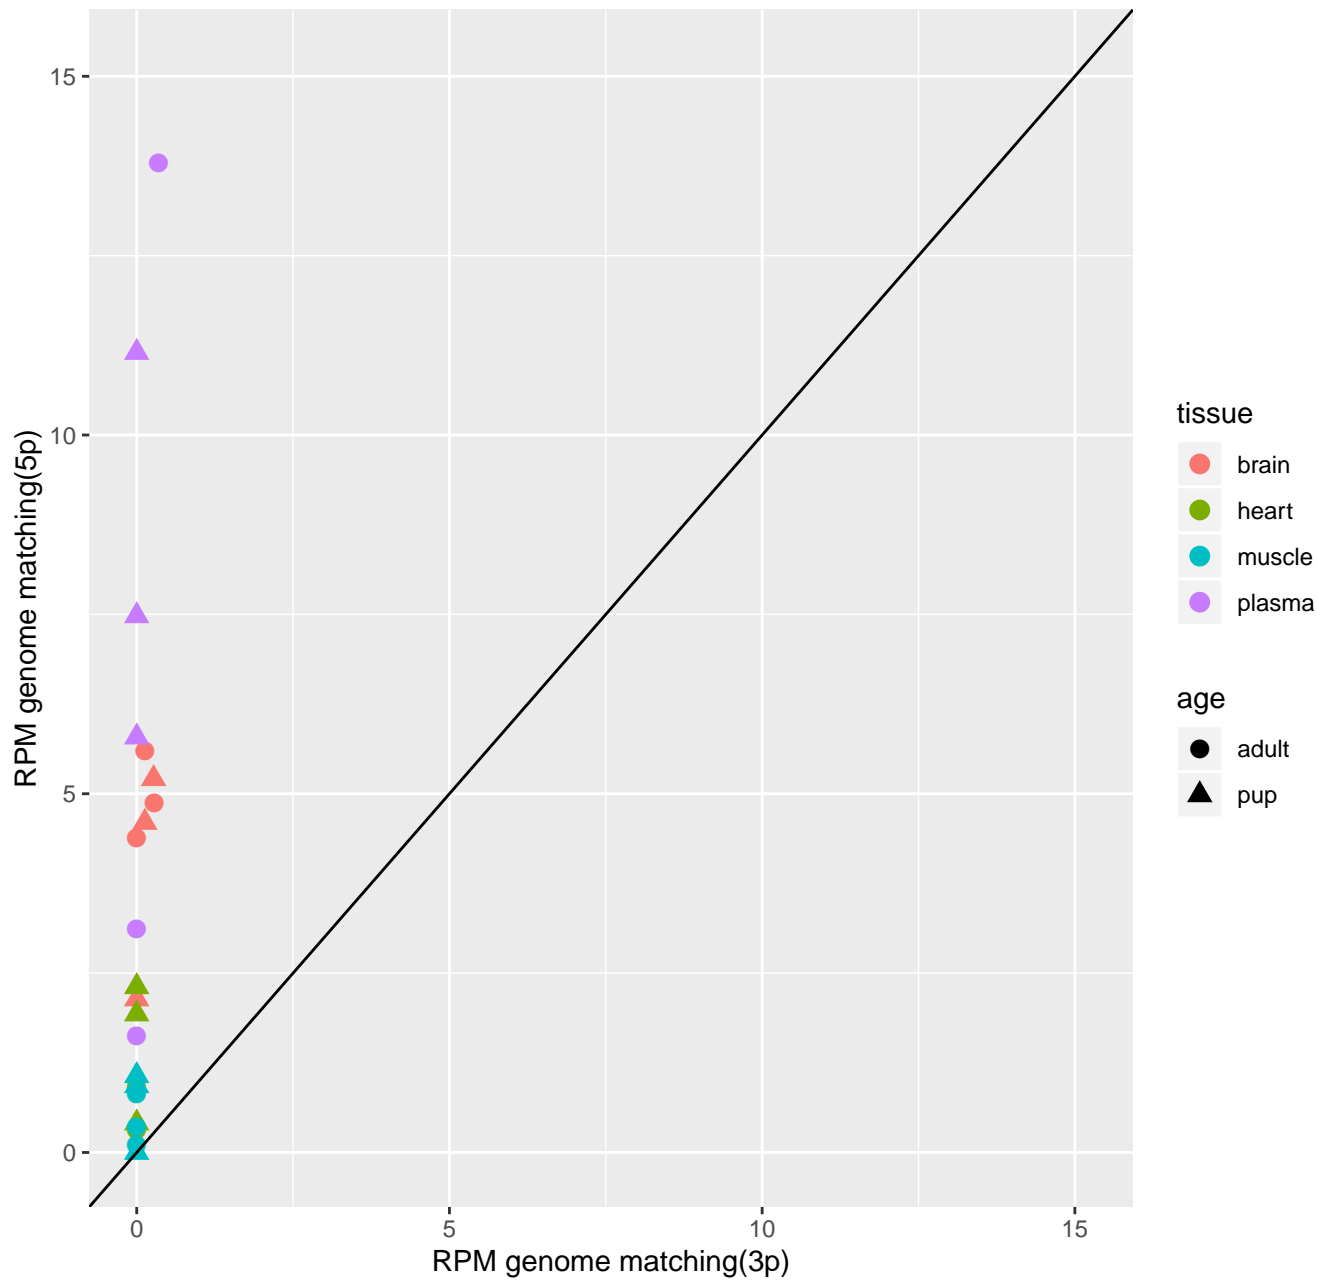

# lwe-miR-490\_loc1

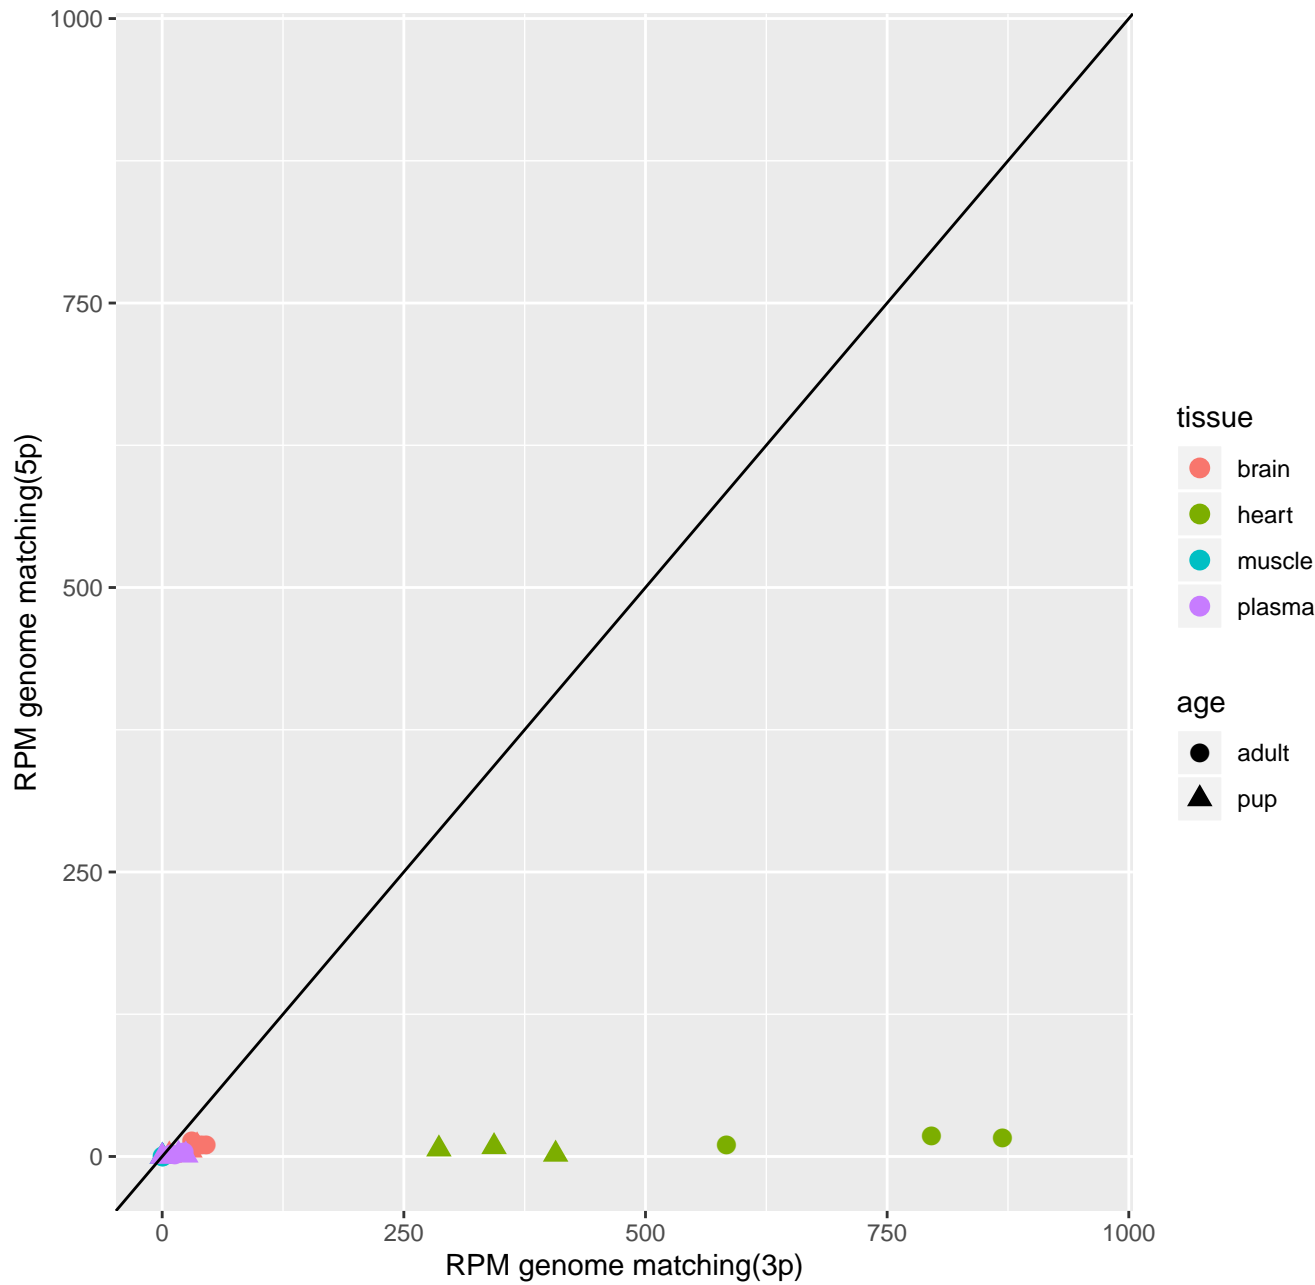

novel\_40

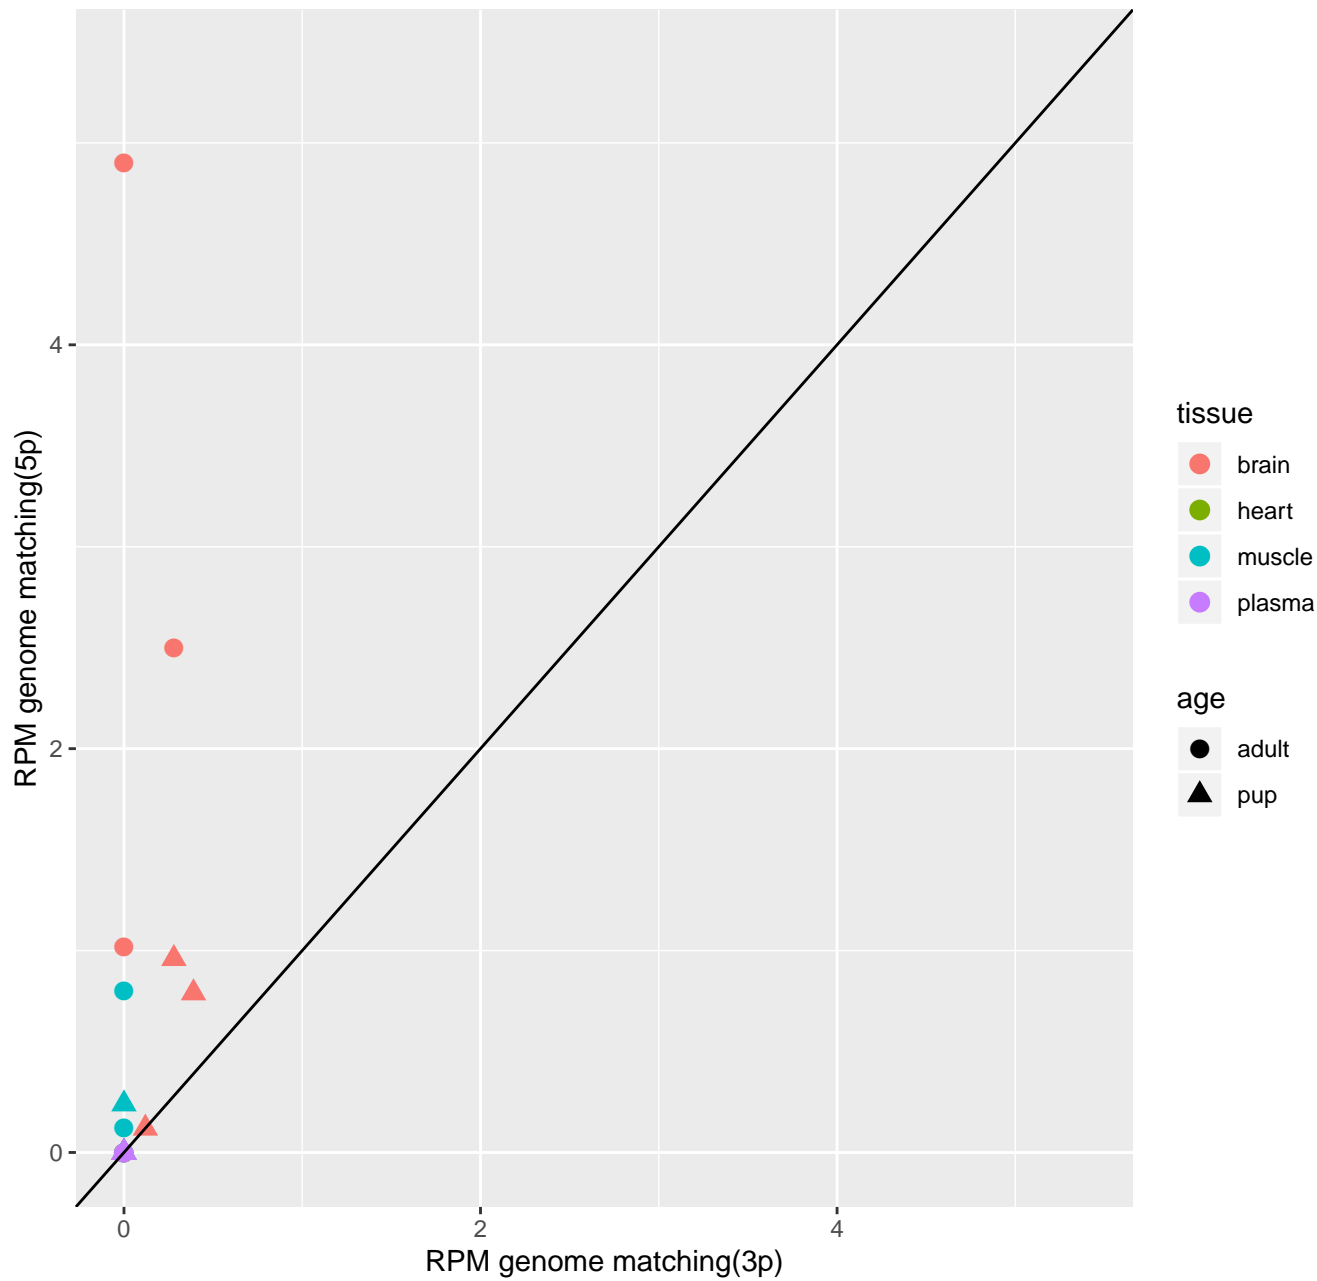



## lwe-miR-423\_loc1

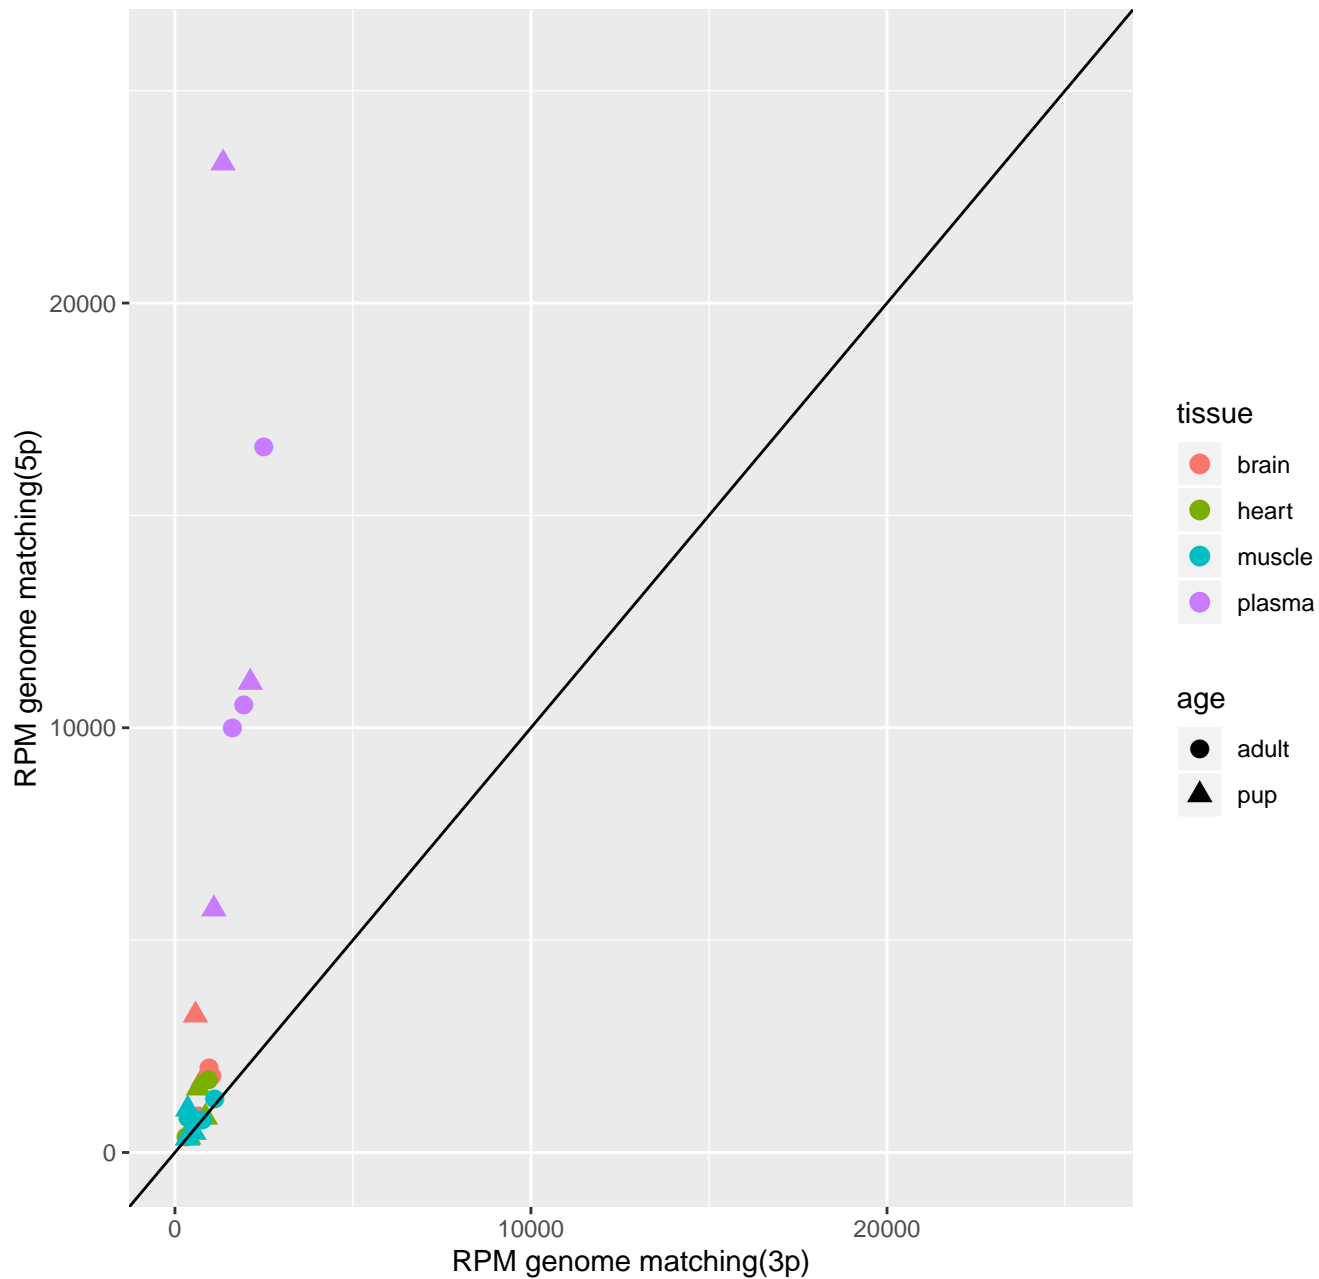

## novel\_41

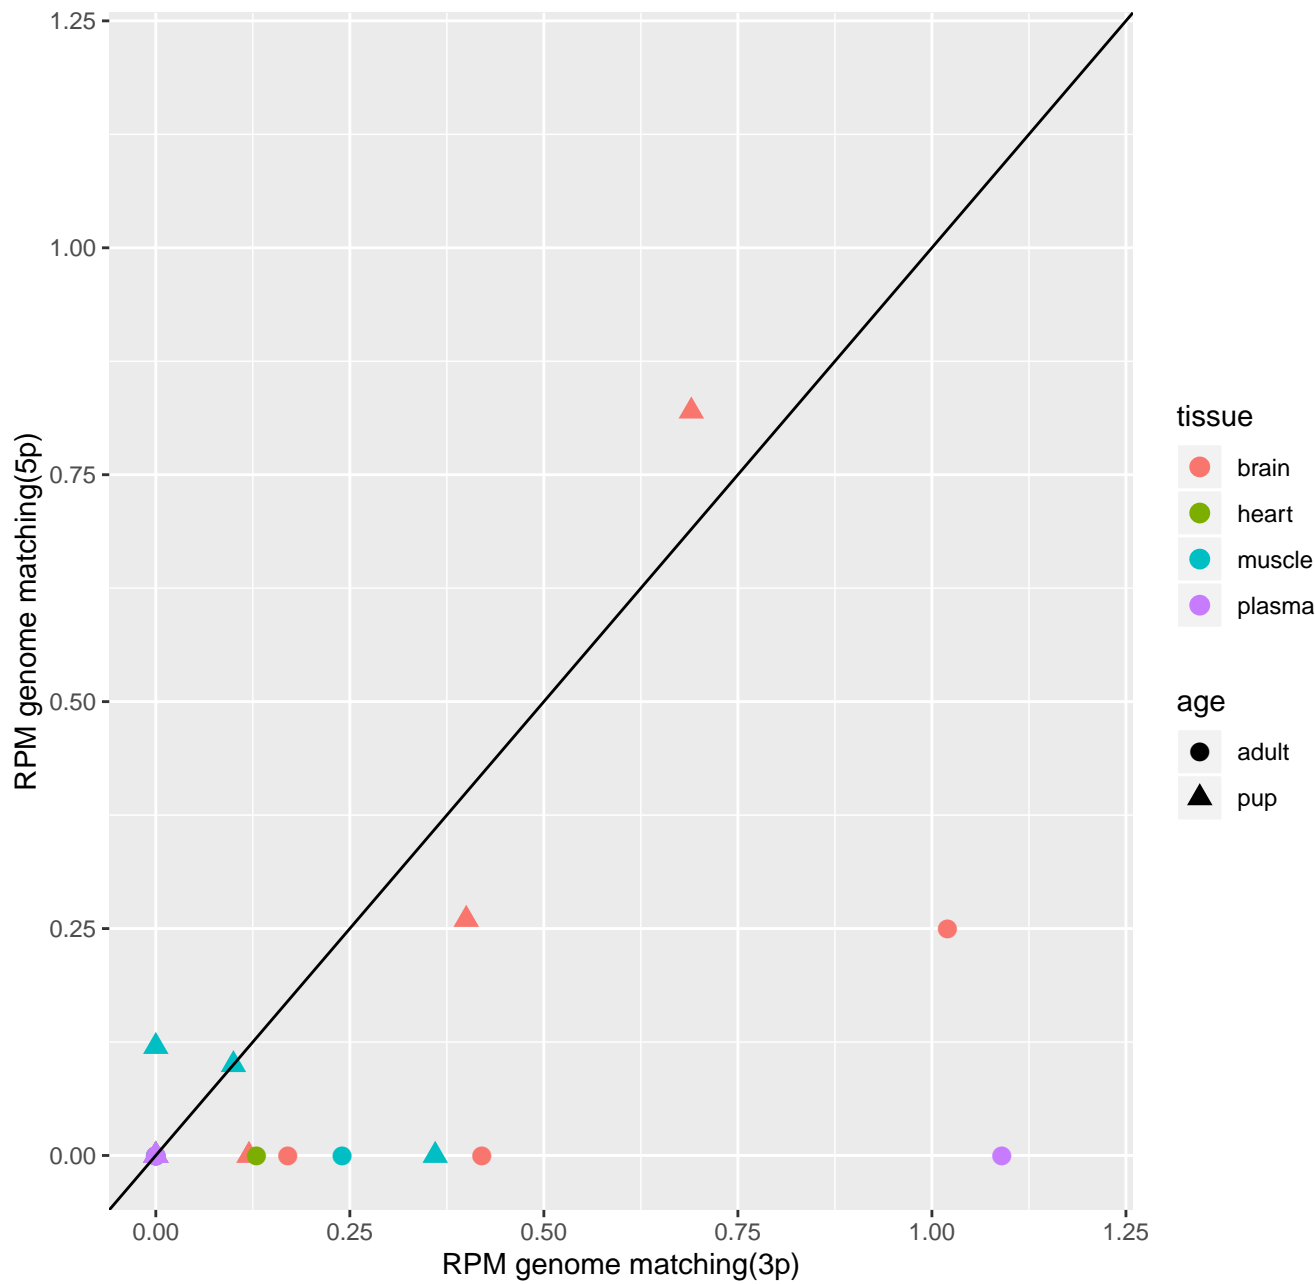

## lwe-miR-34\_loc1

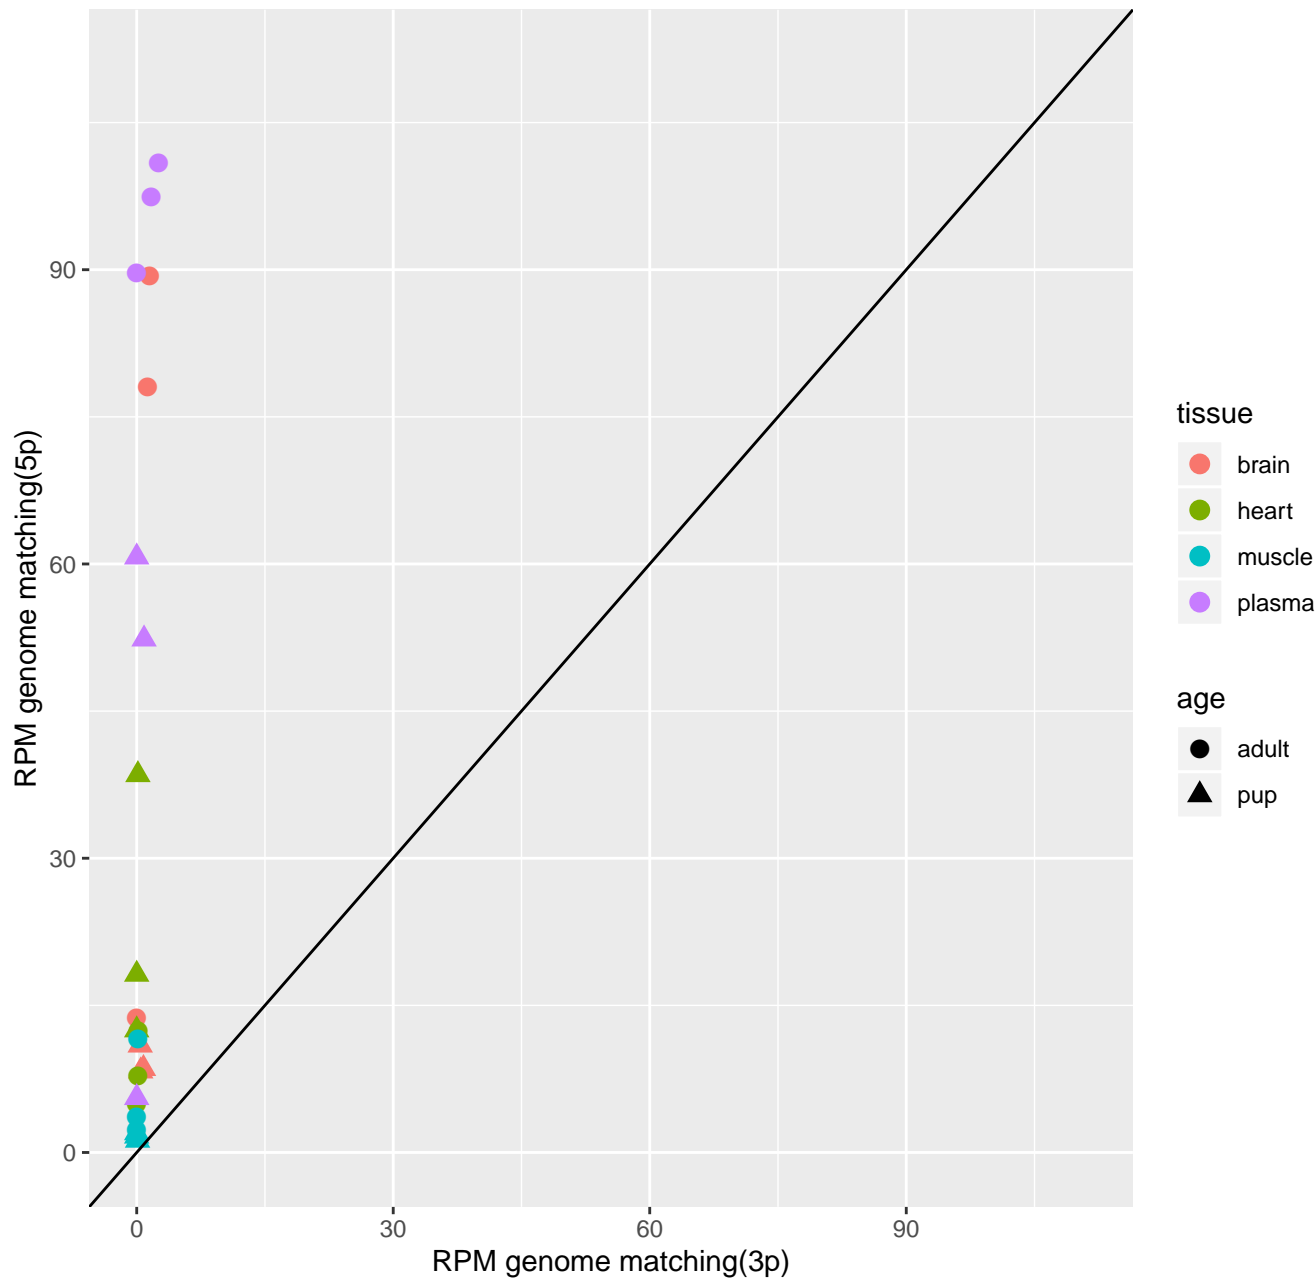

# lwe-miR-92b\_loc1

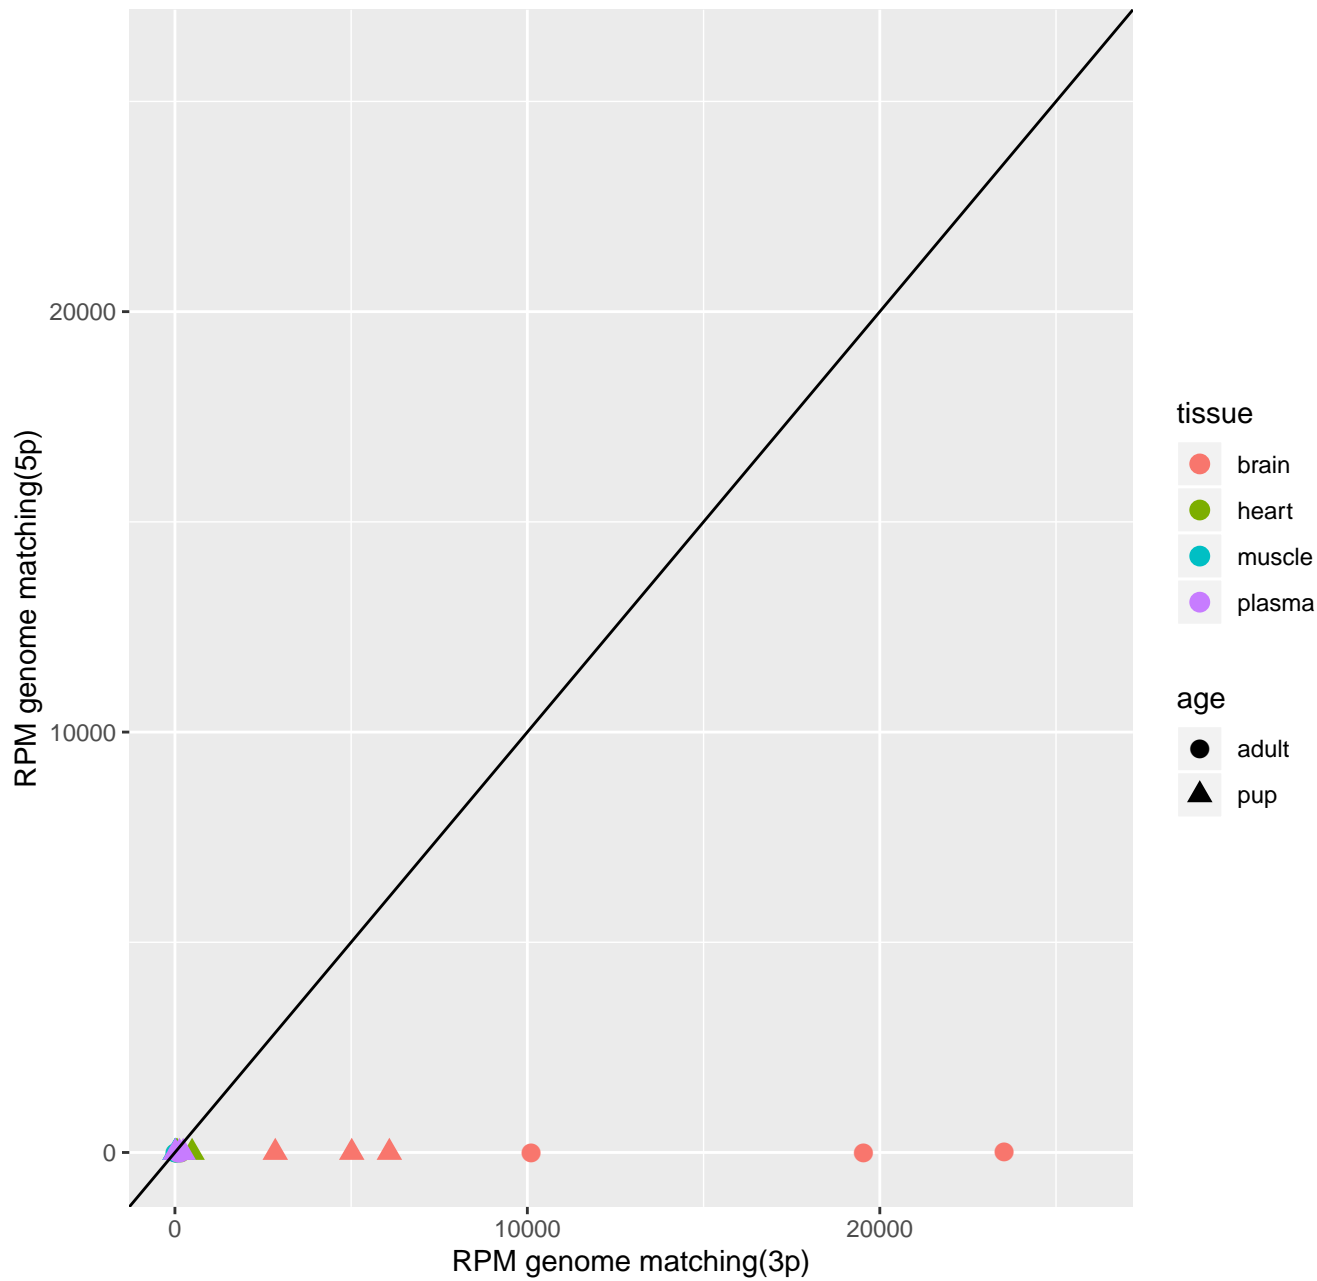

## lwe-miR-122\_loc1

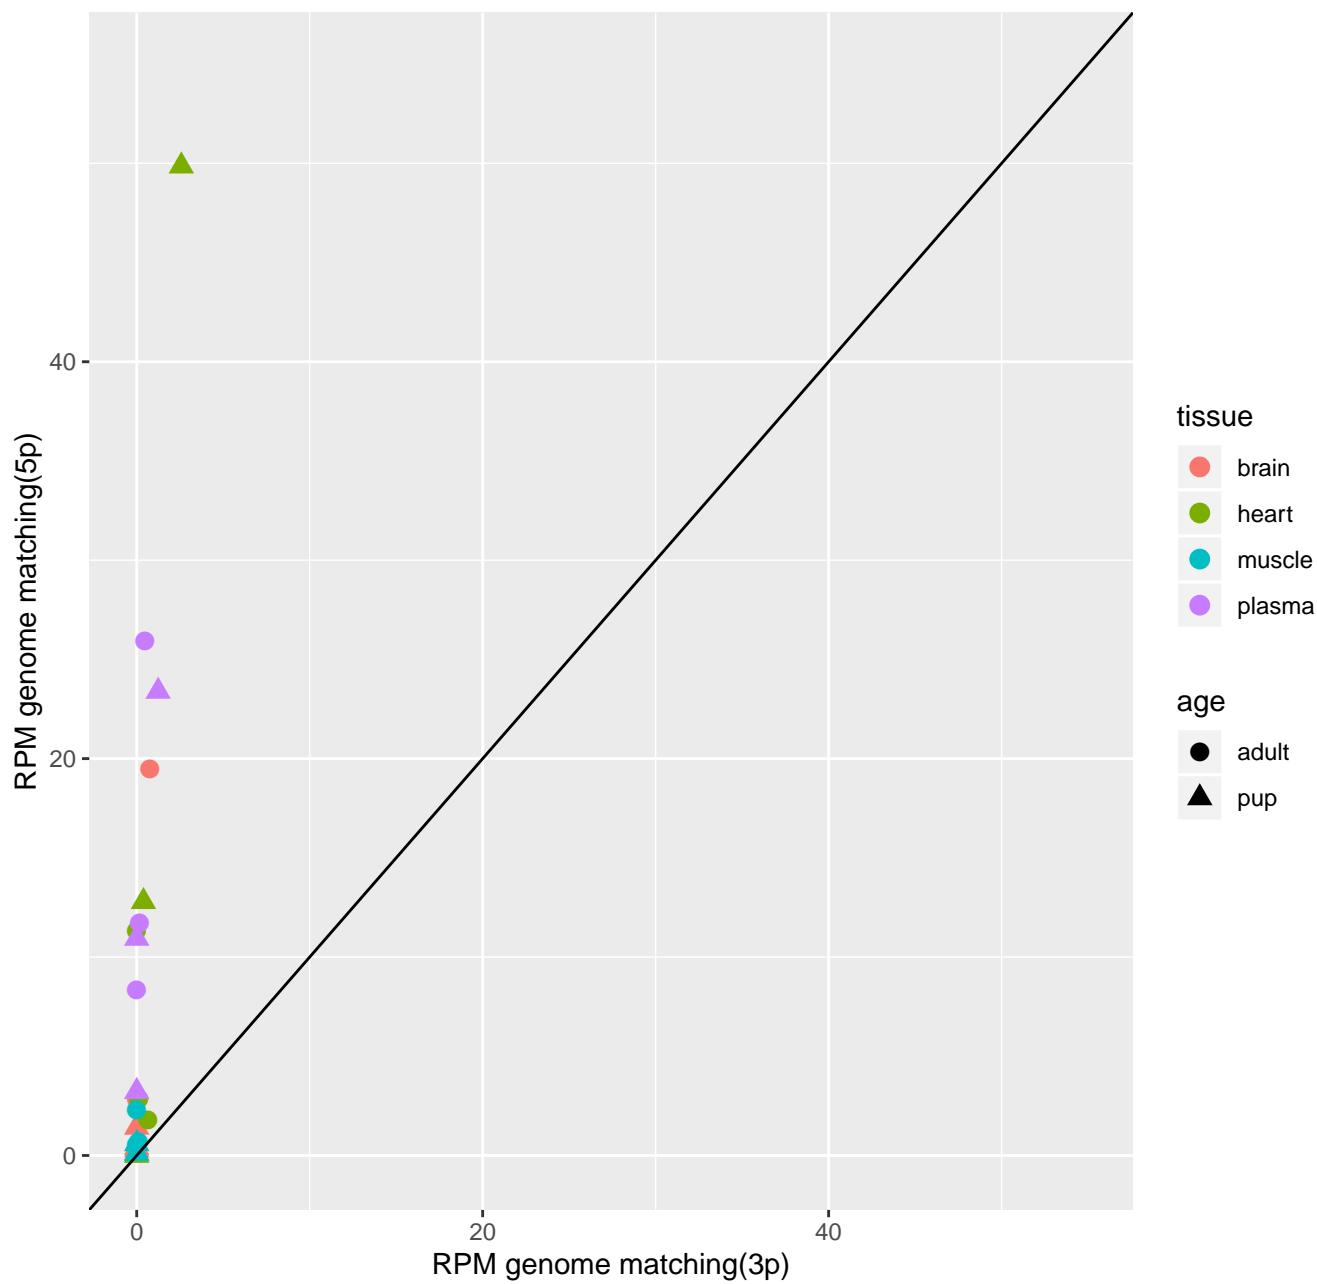

# lwe-miR-1296\_loc1

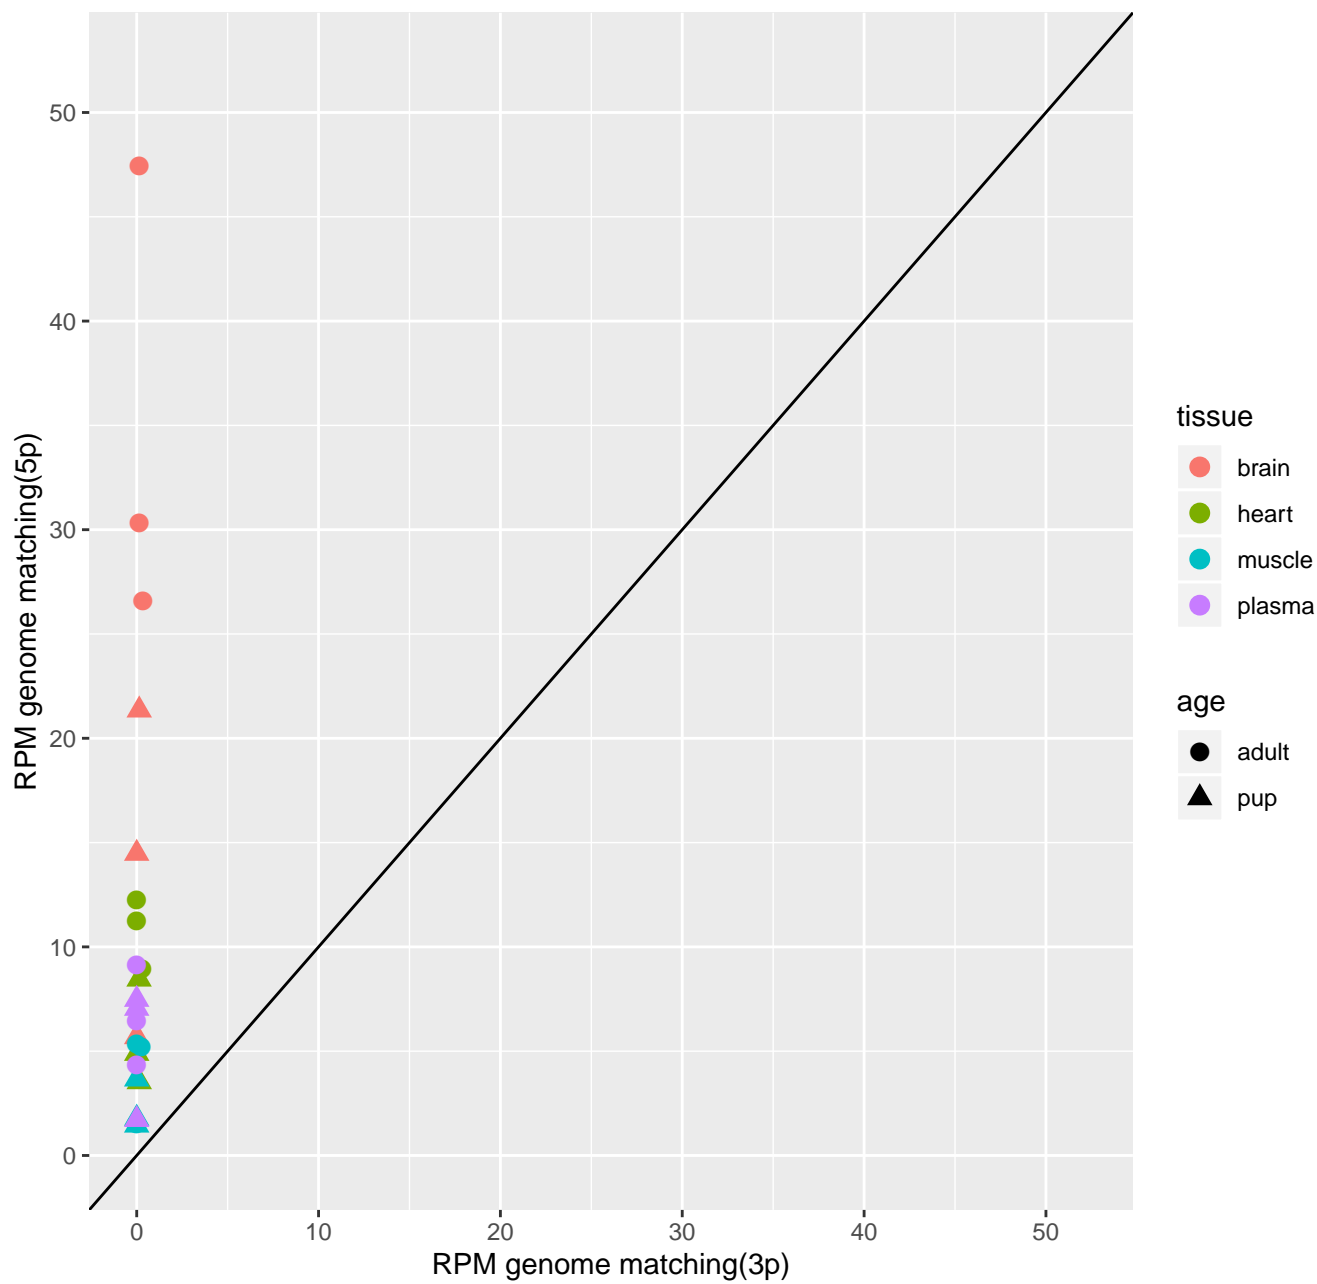

## lwe-miR-454\_loc1

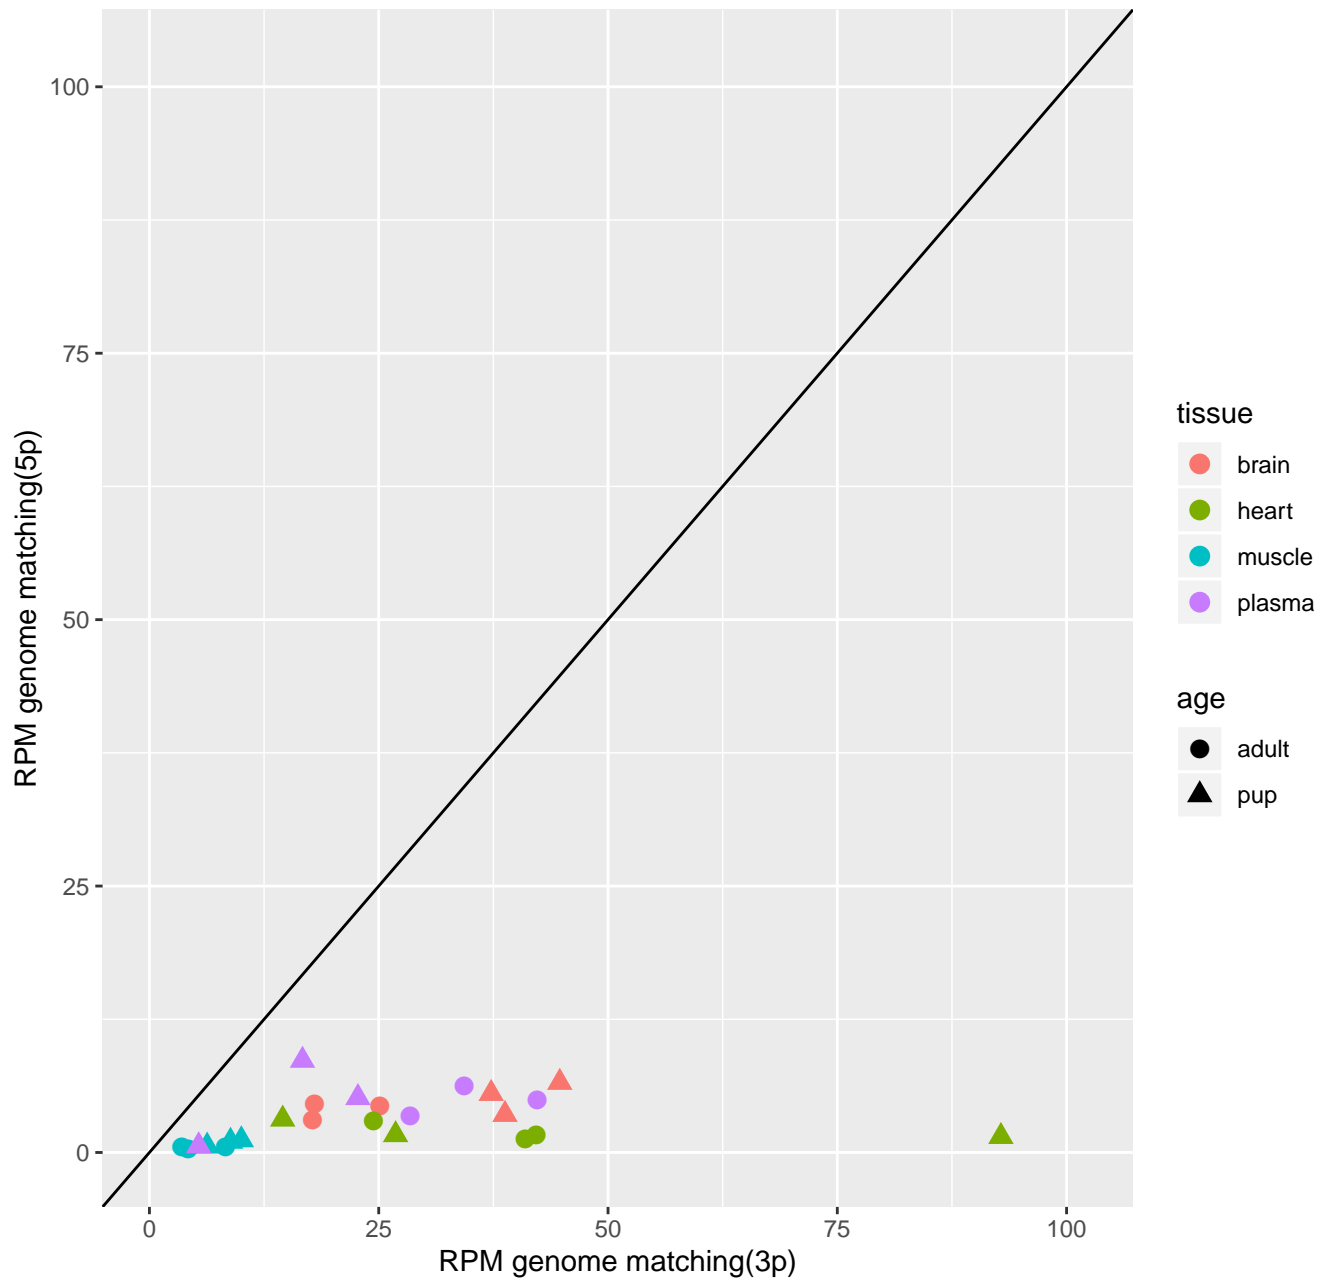





## novel\_42

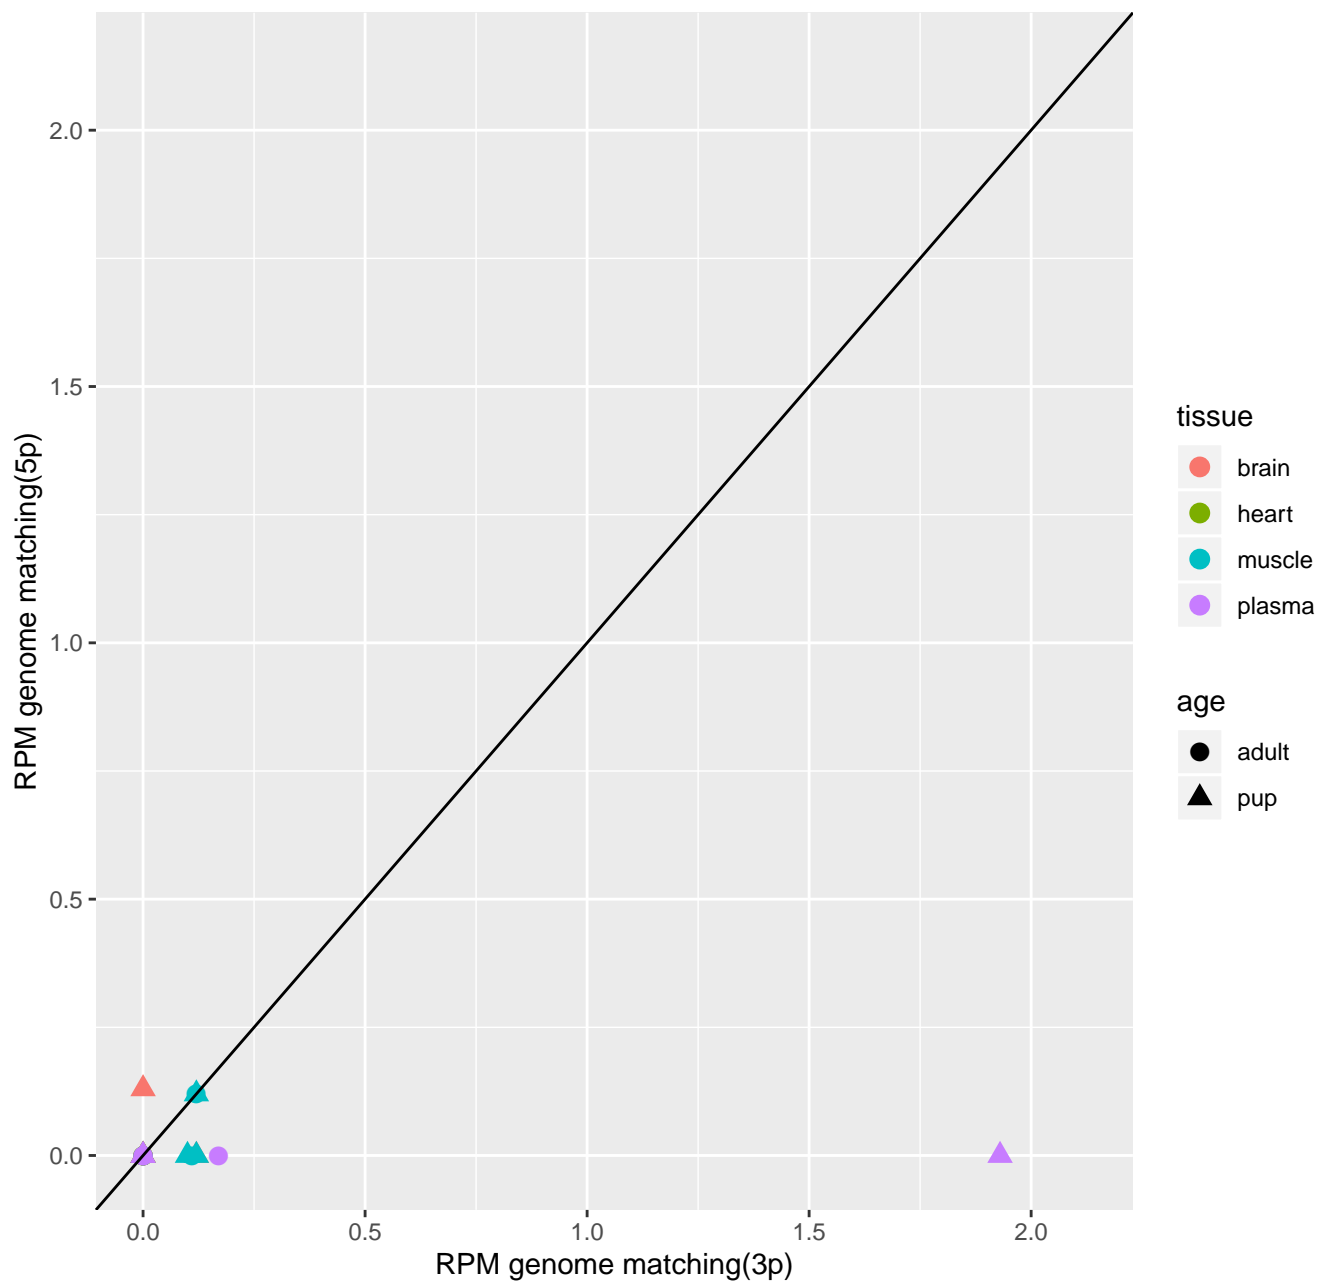

## lwe-miR-676\_loc1

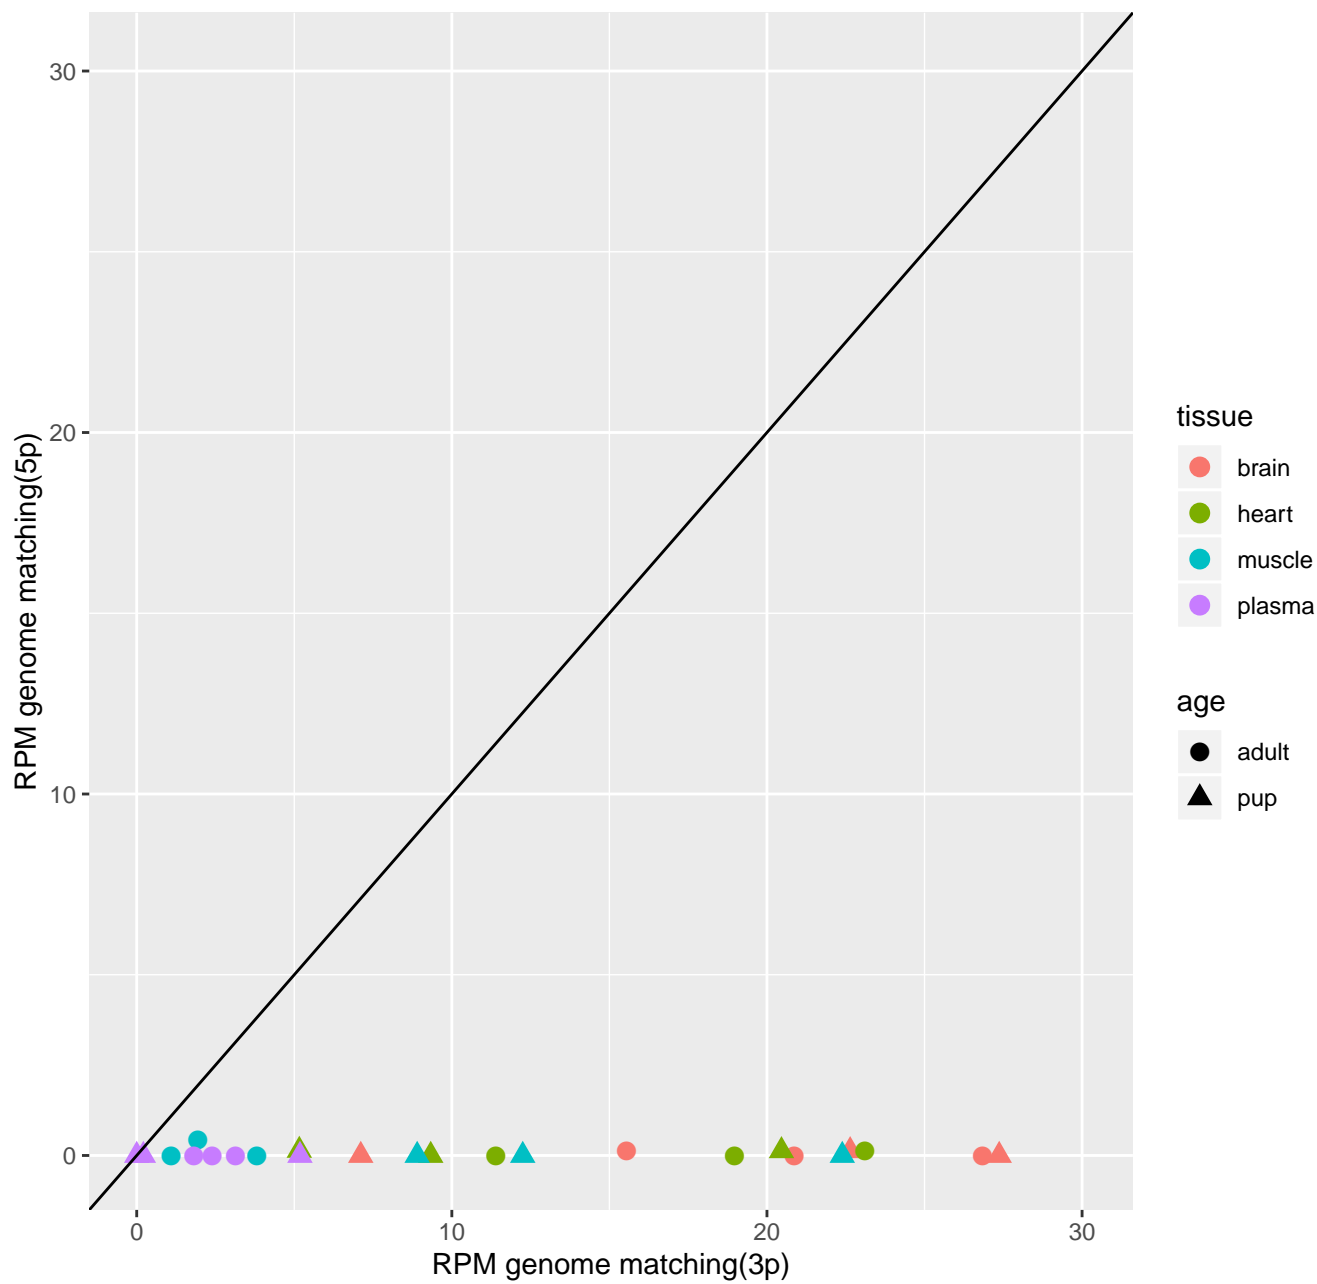

## novel\_43

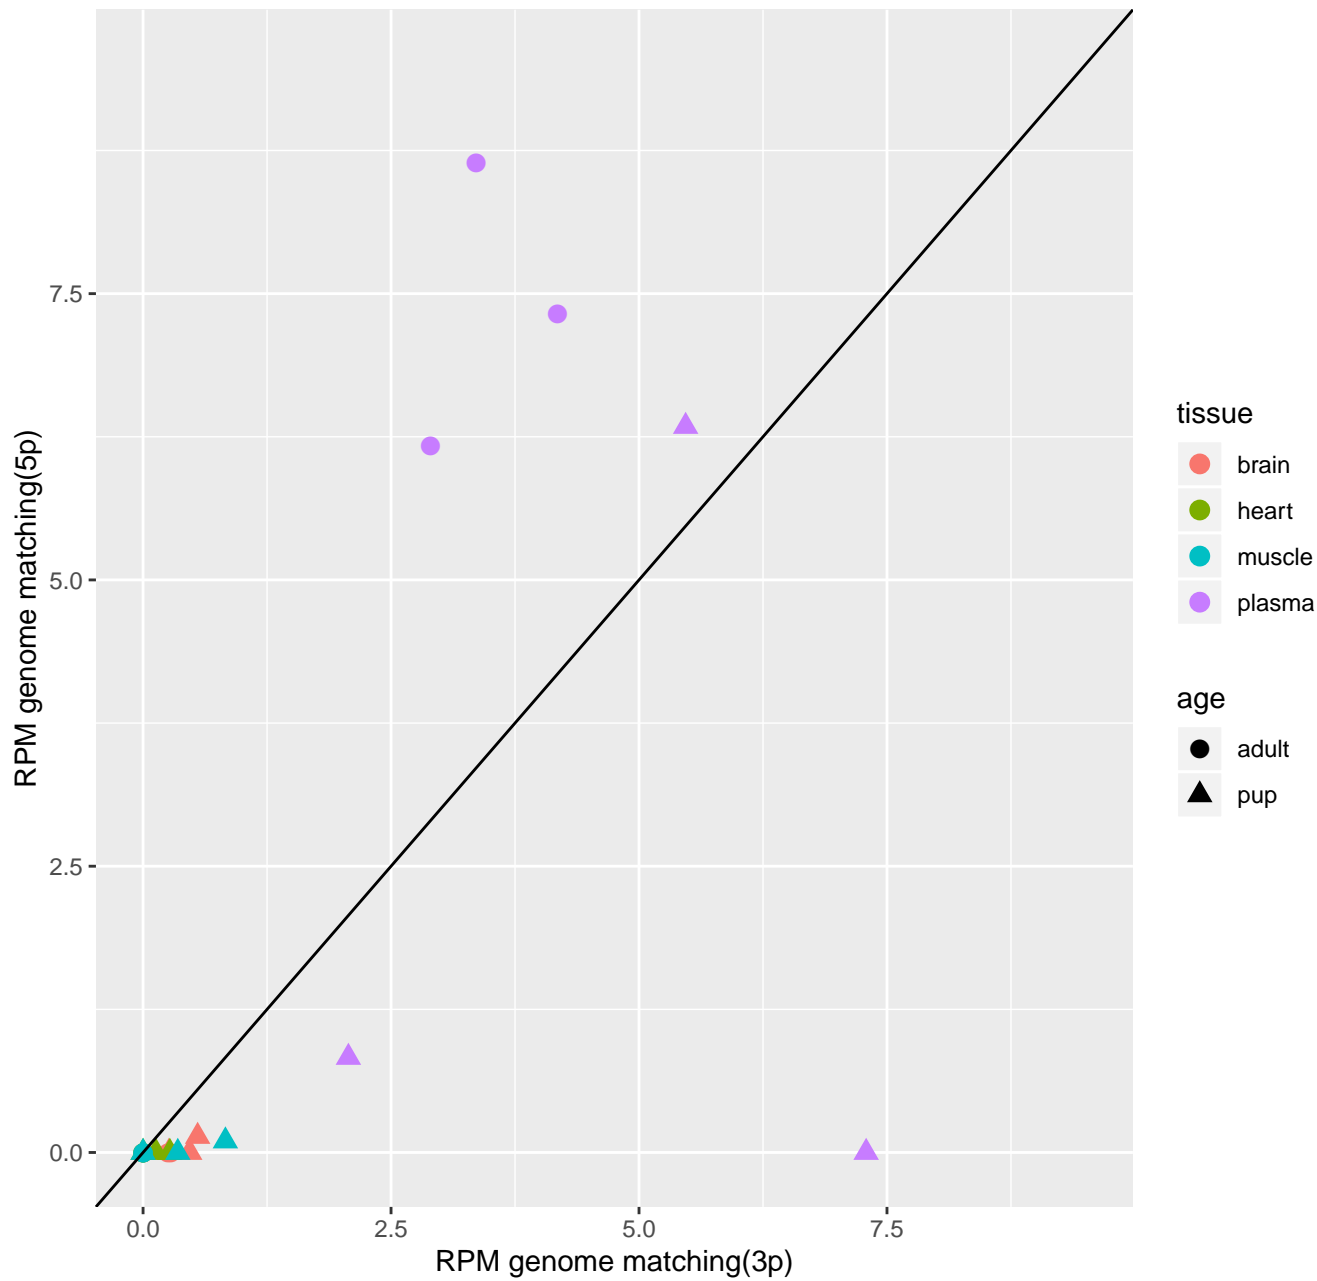

## novel\_44

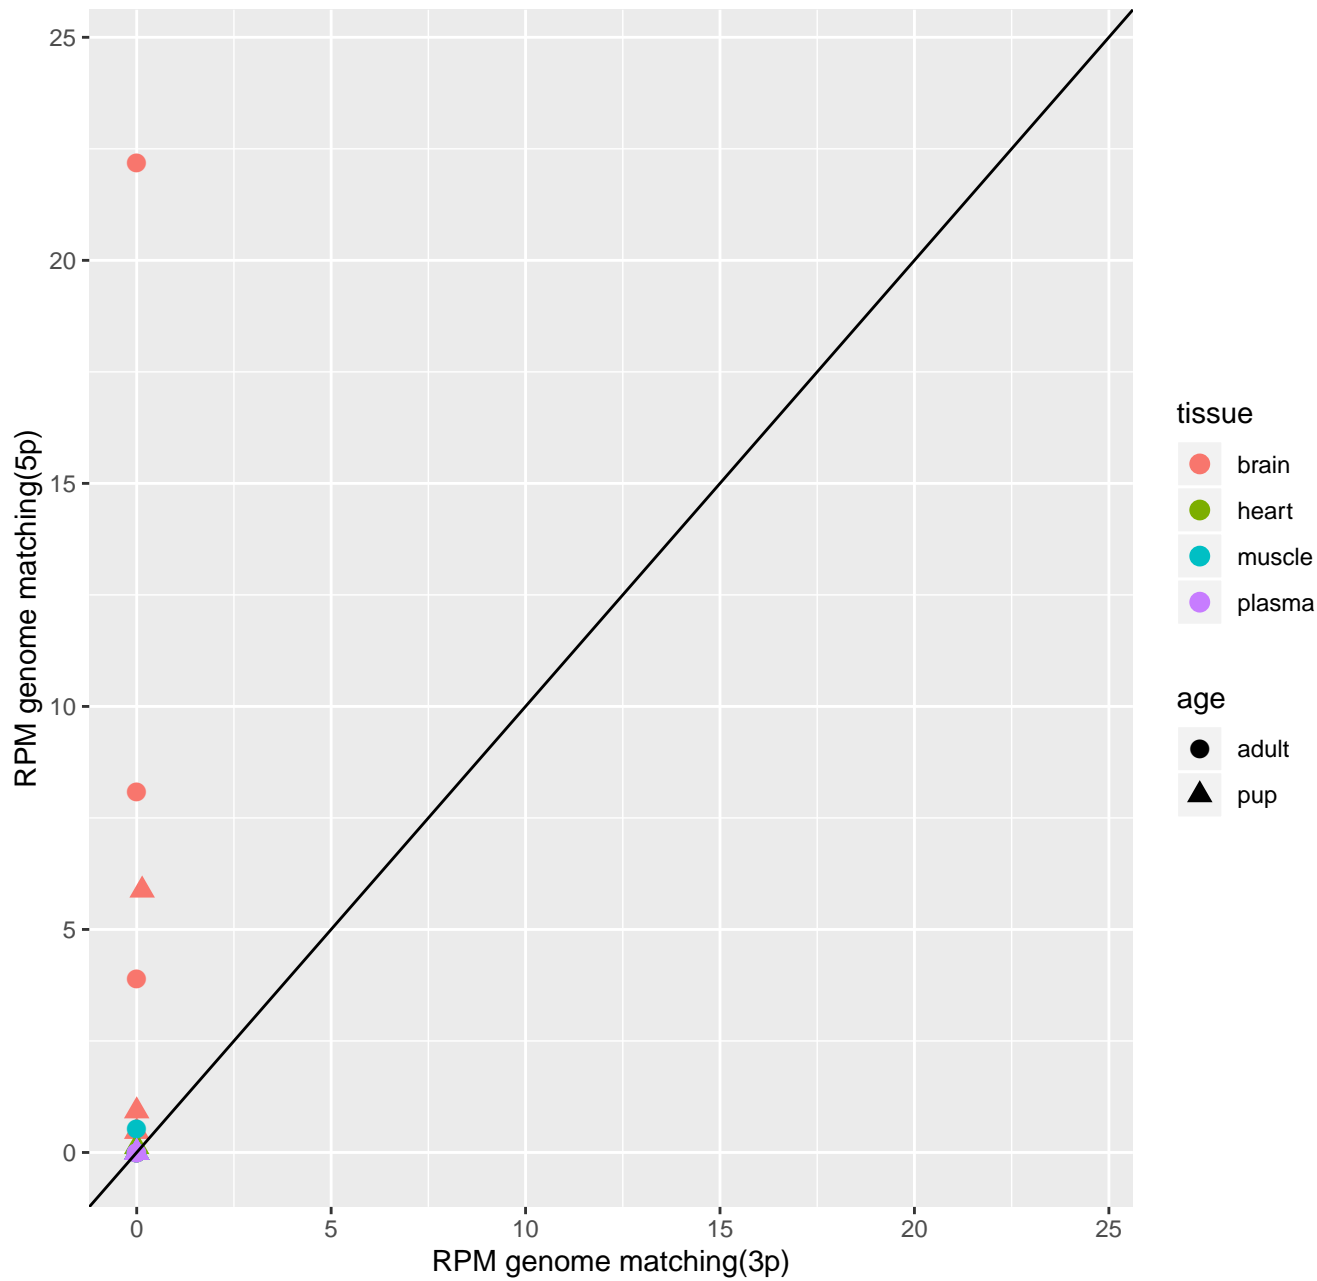

## lwe-miR-32\_loc1

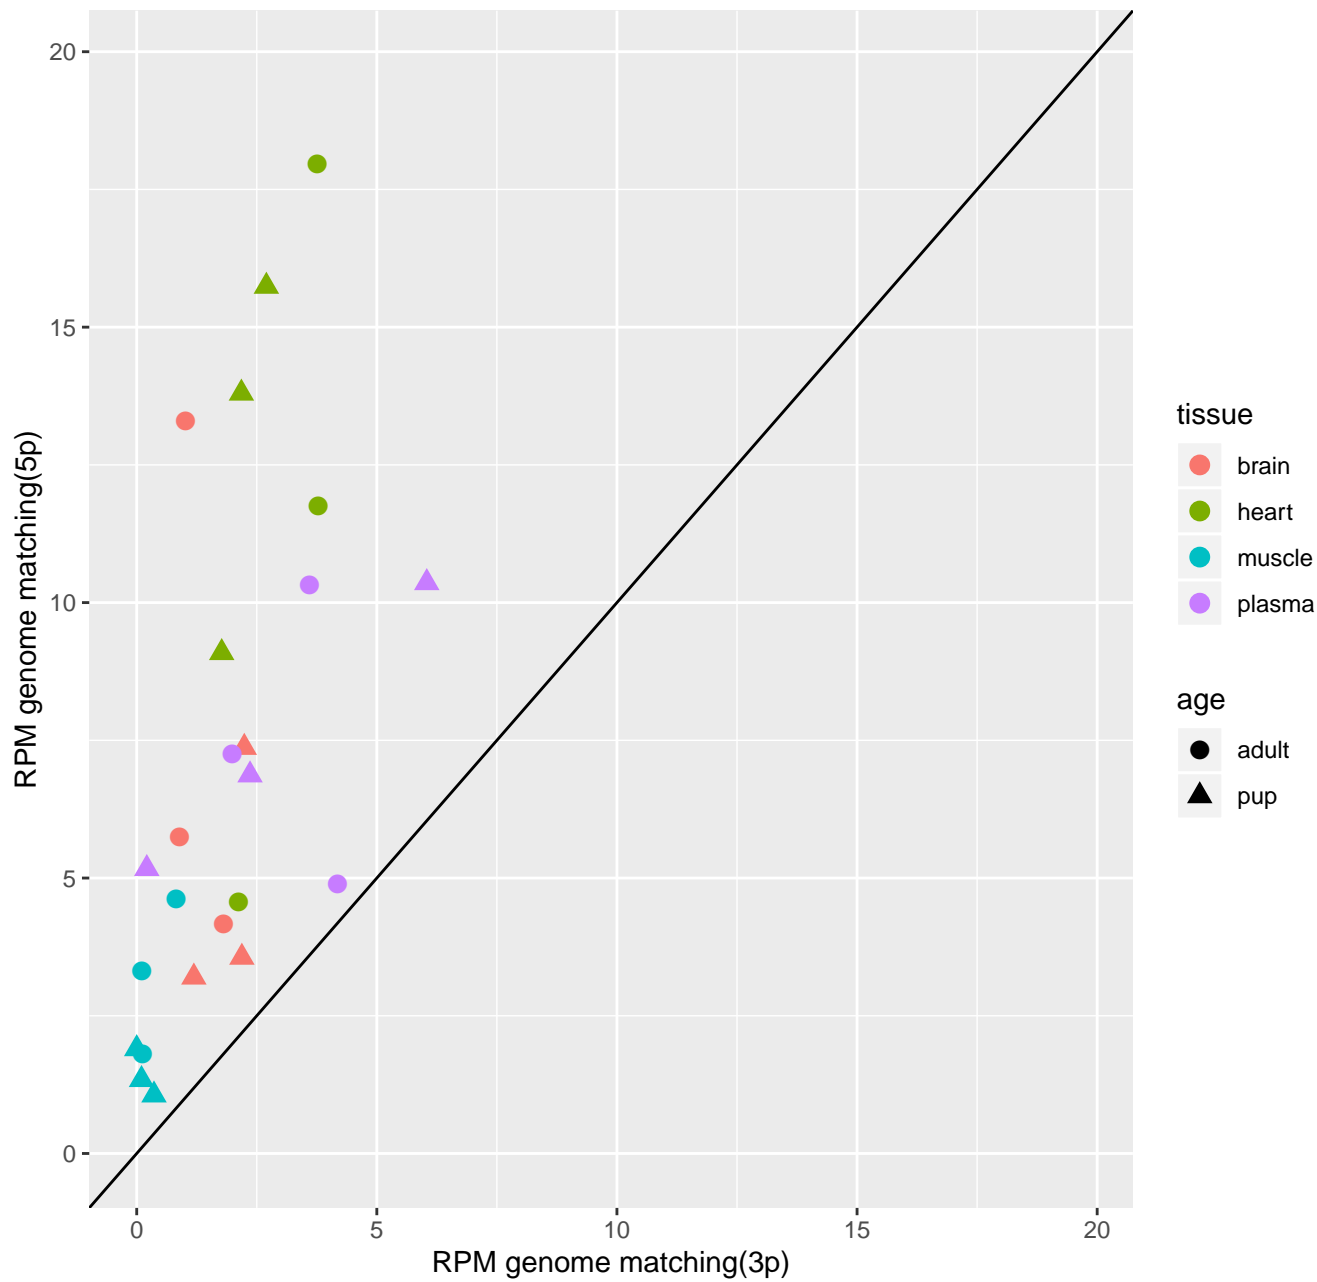

## novel\_45

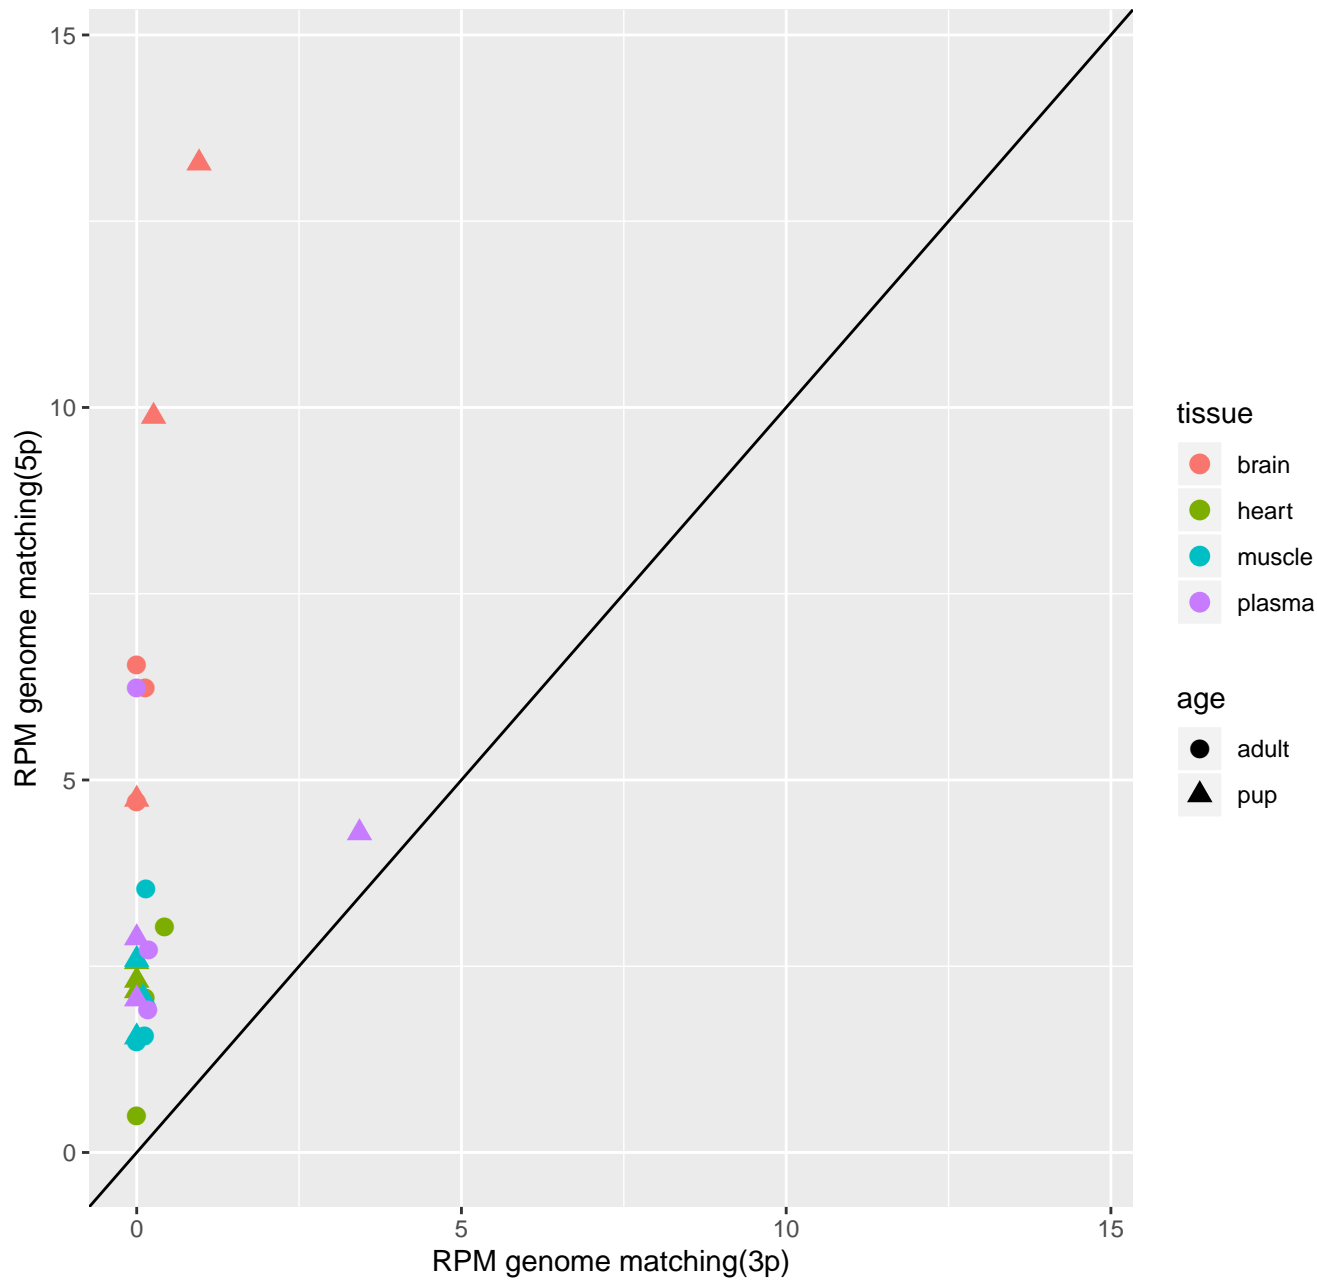

# lwe-miR-95\_loc1

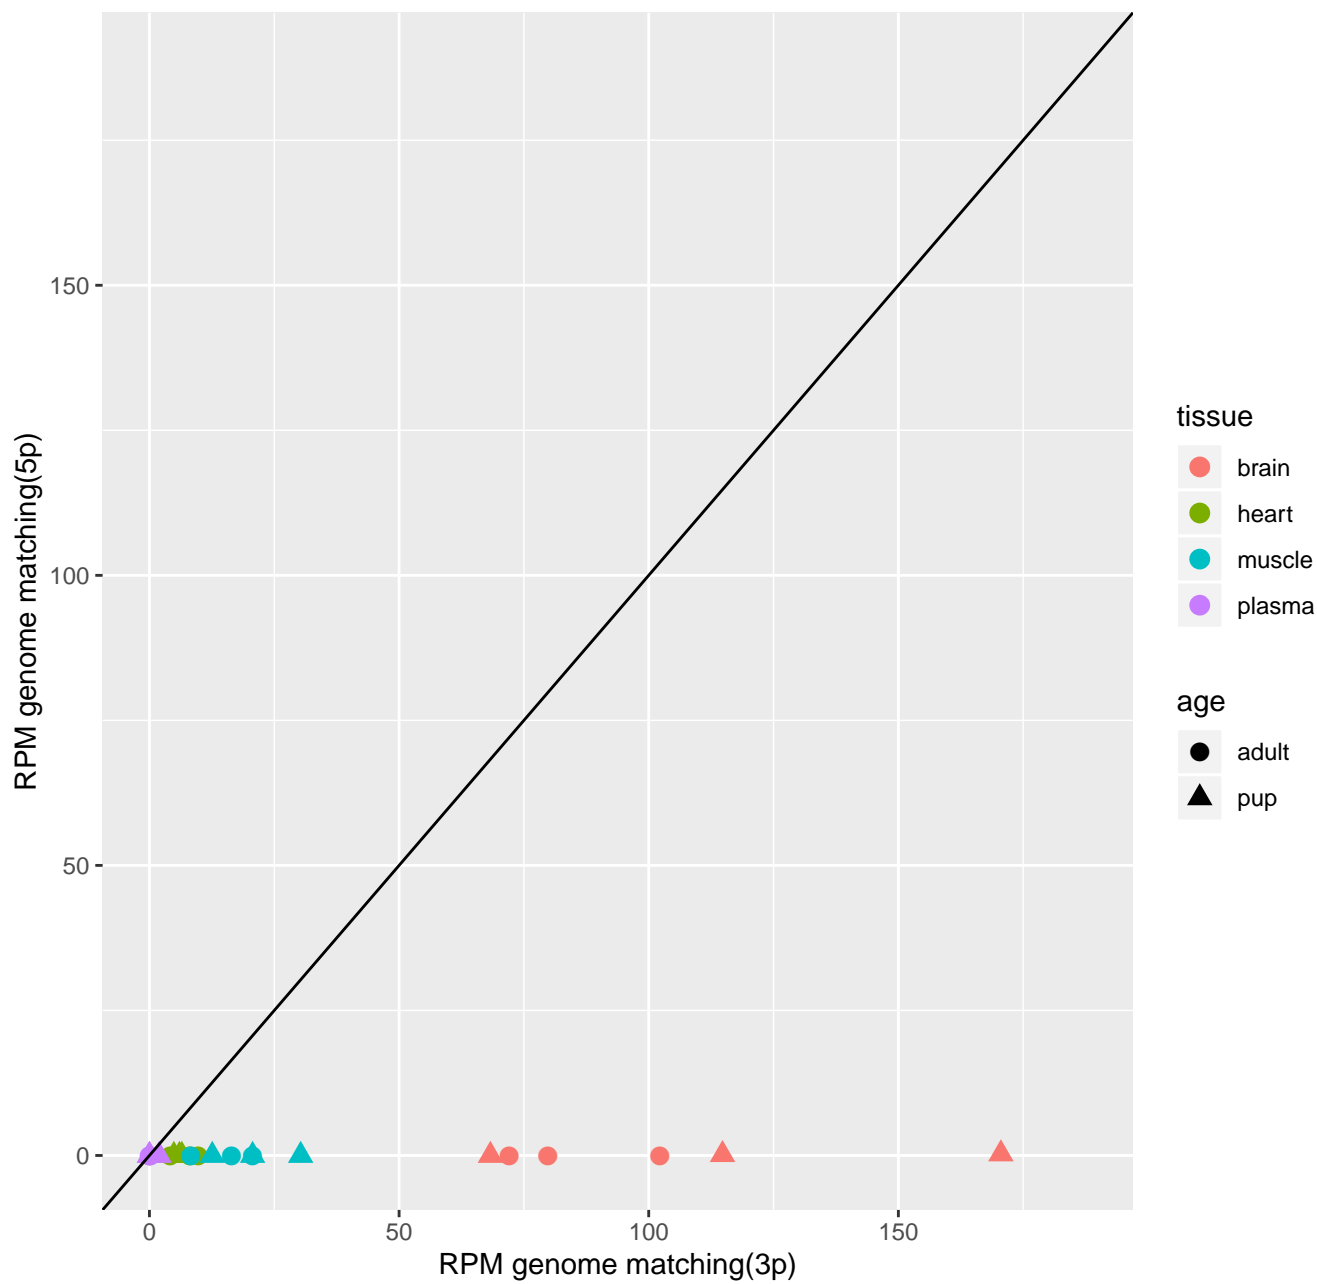

## lwe-miR-8859a\_loc1

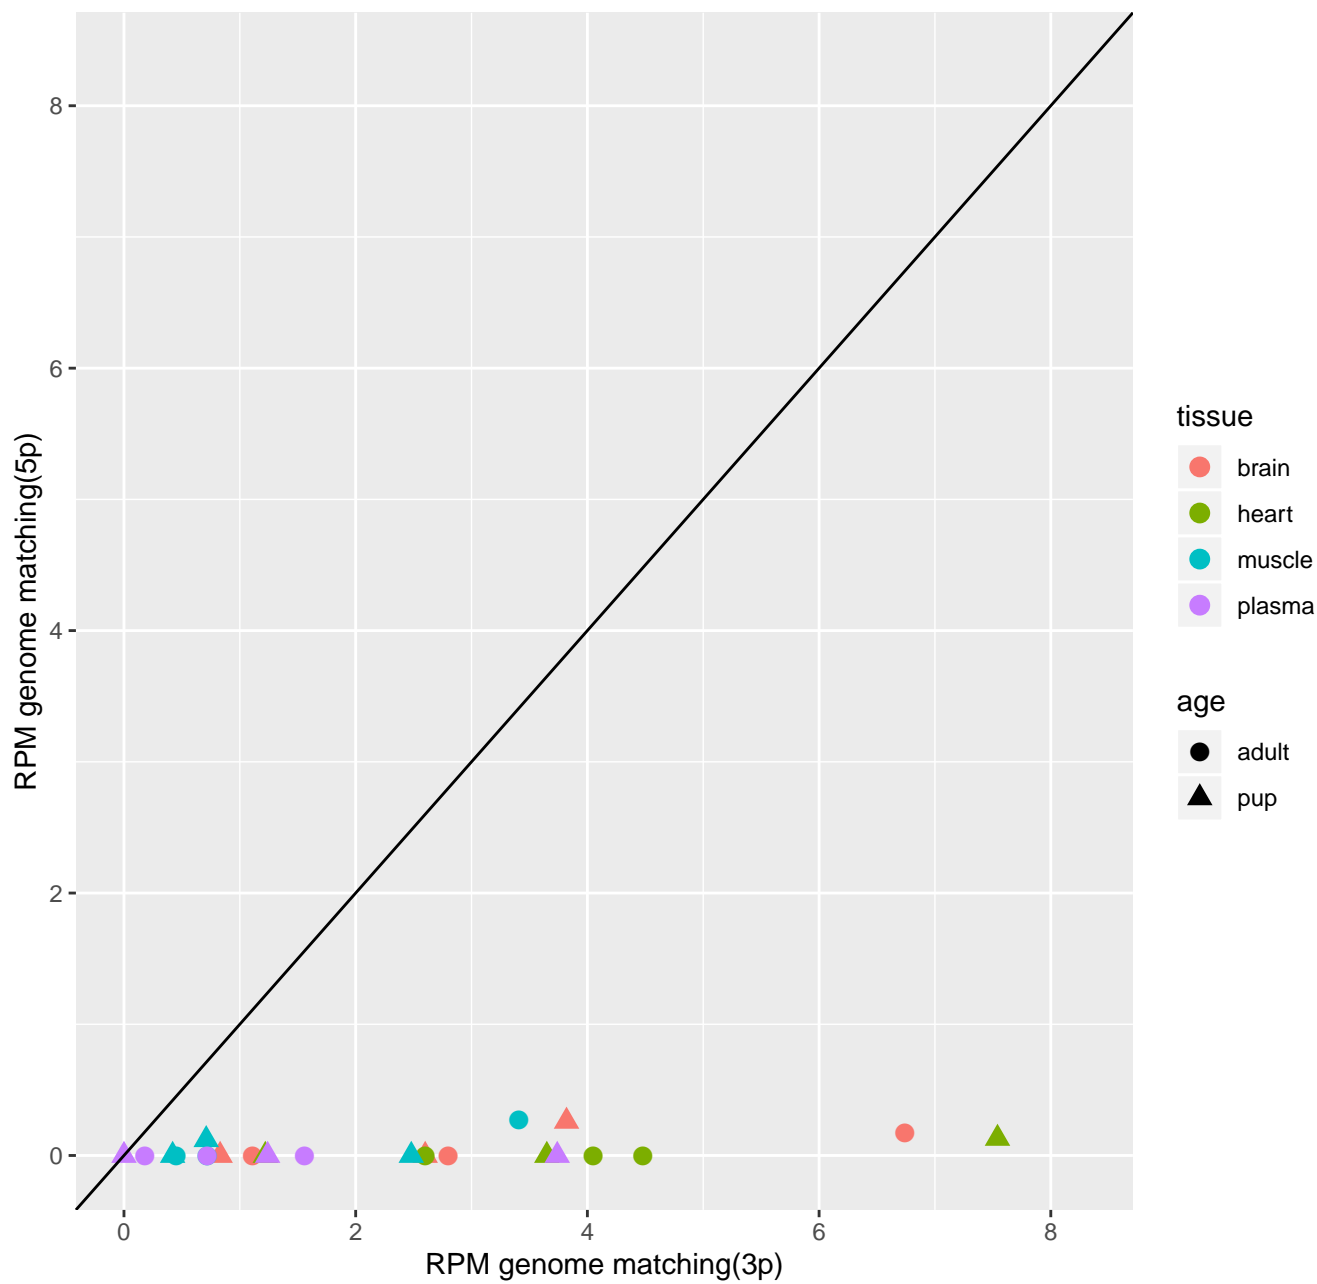



## lwe-miR-8859b\_loc1

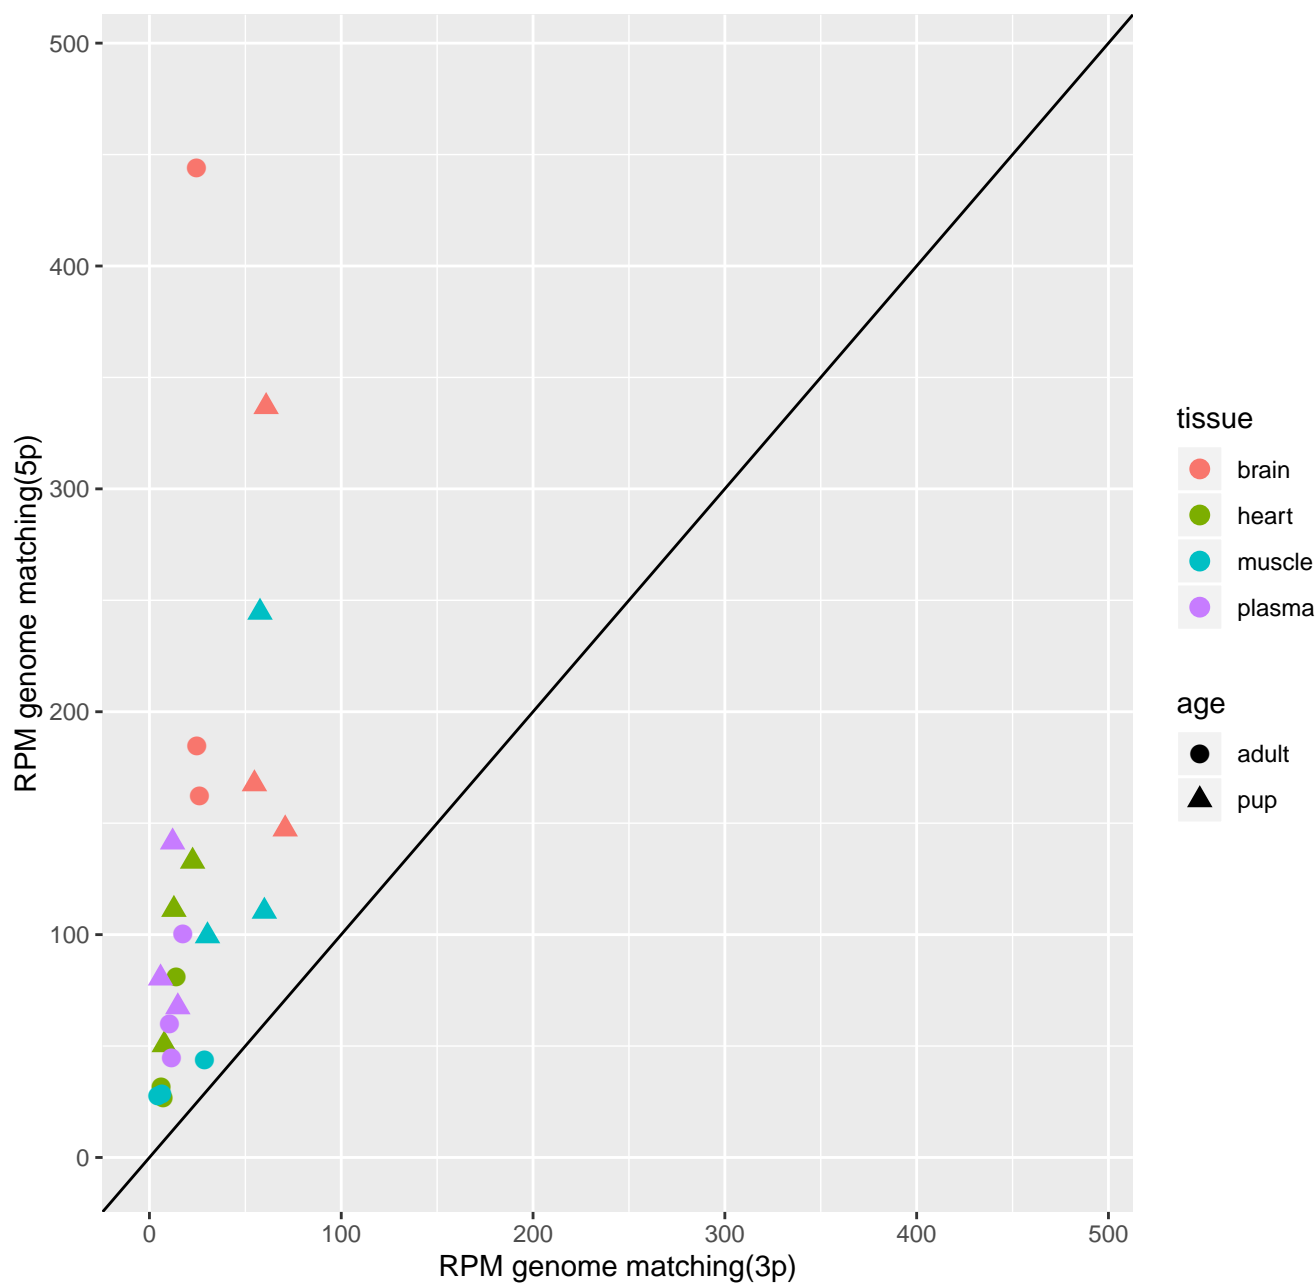

## novel\_46

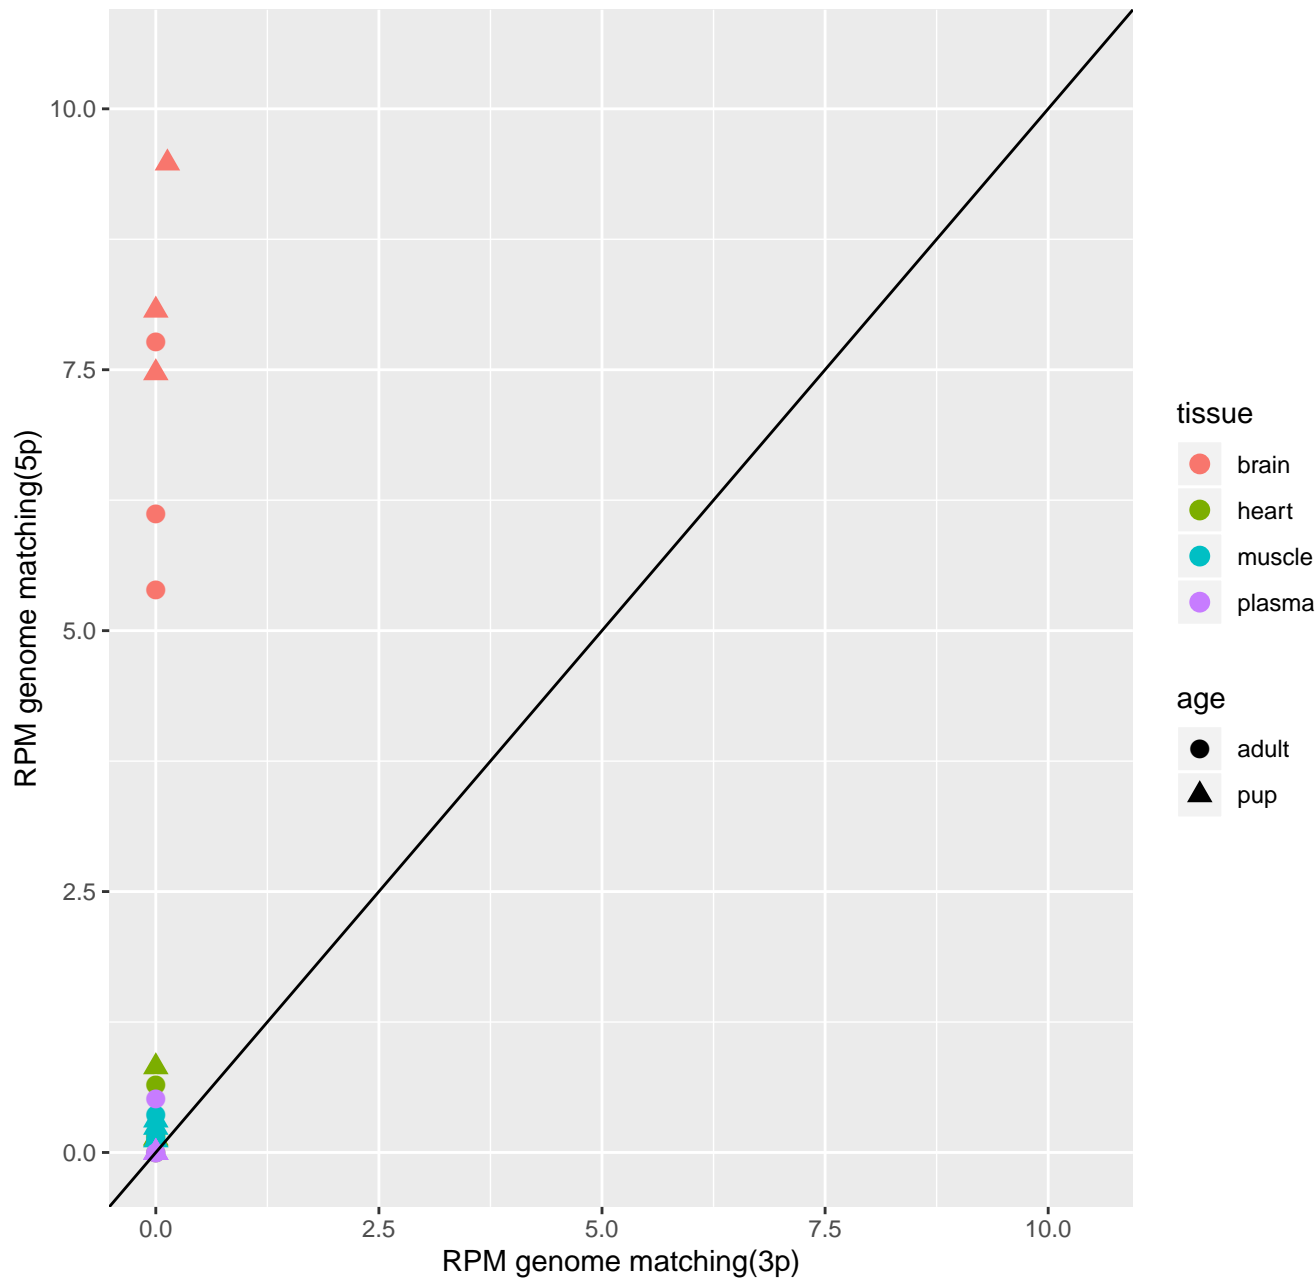

# lwe-miR-105\_loc1

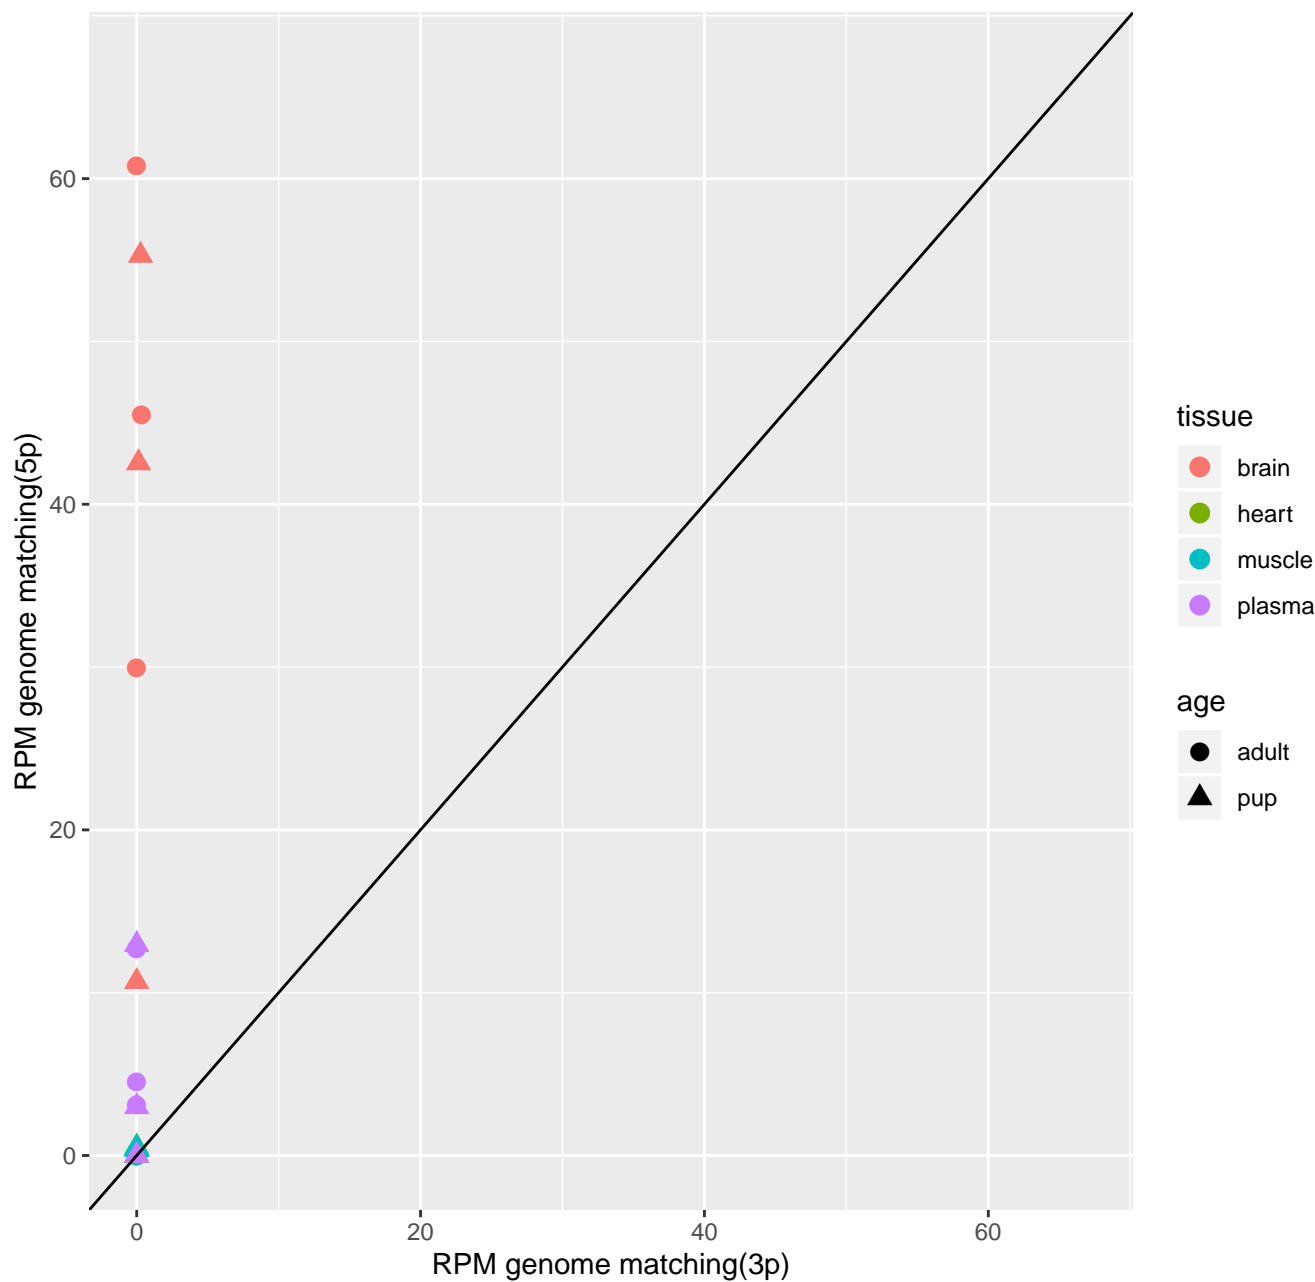

## lwe-miR-105\_loc2

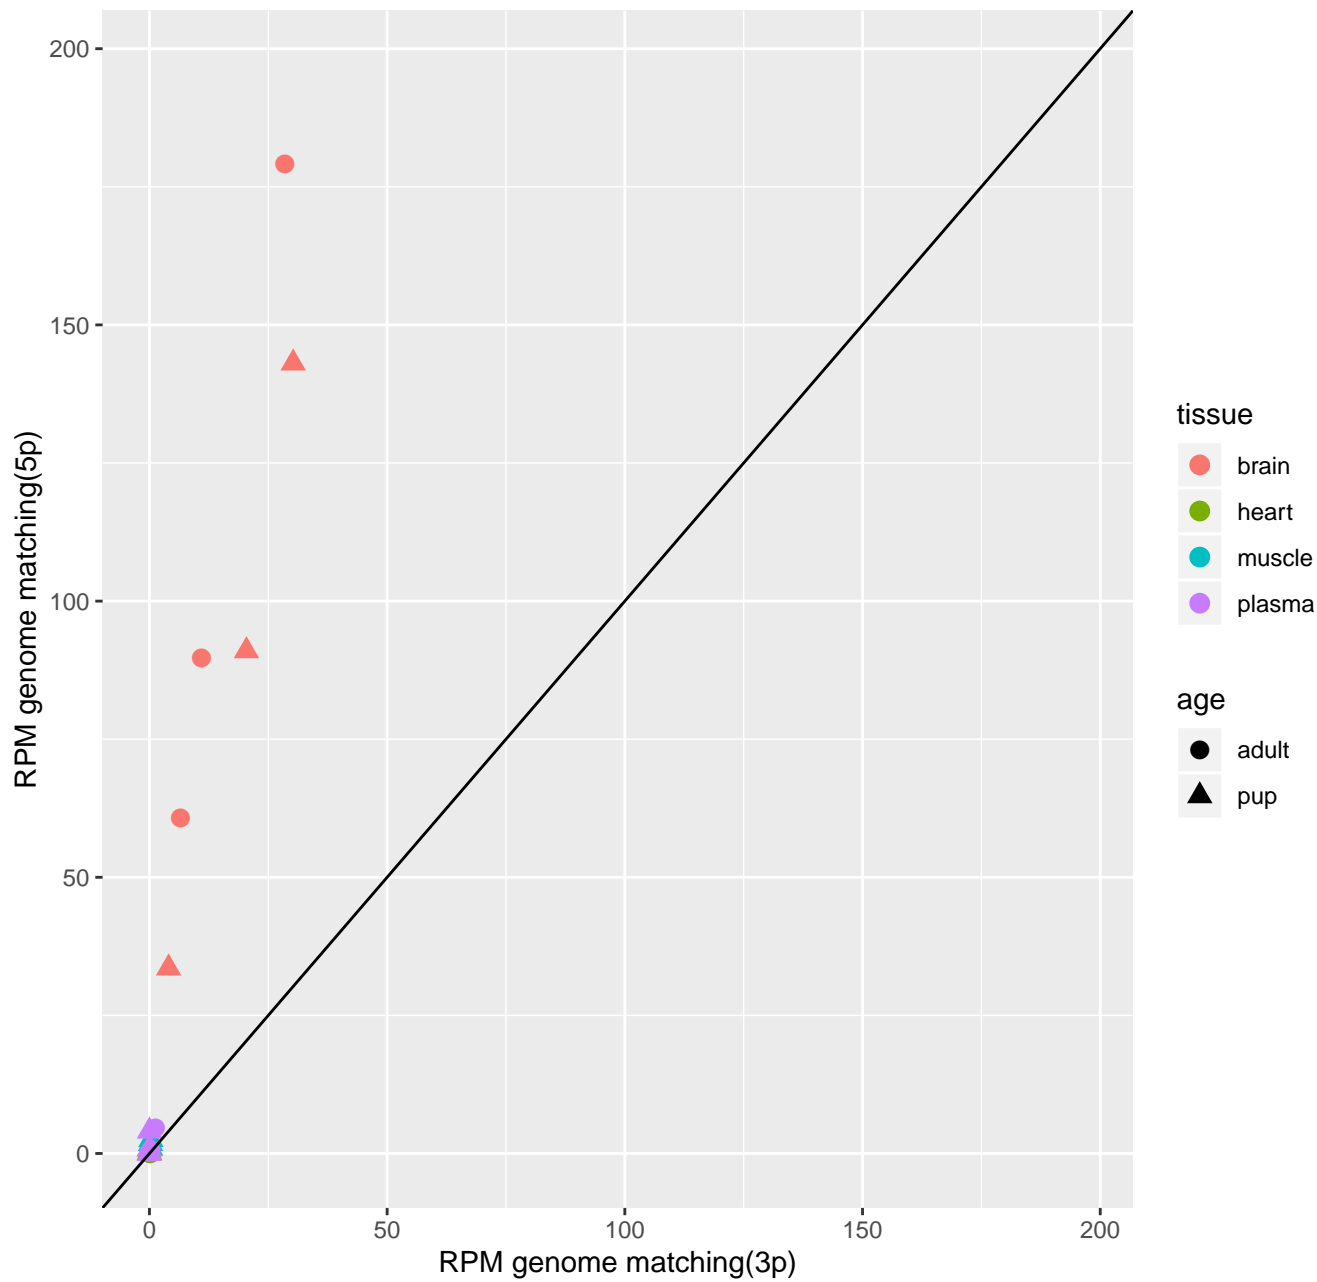

## lwe-miR-224\_loc1

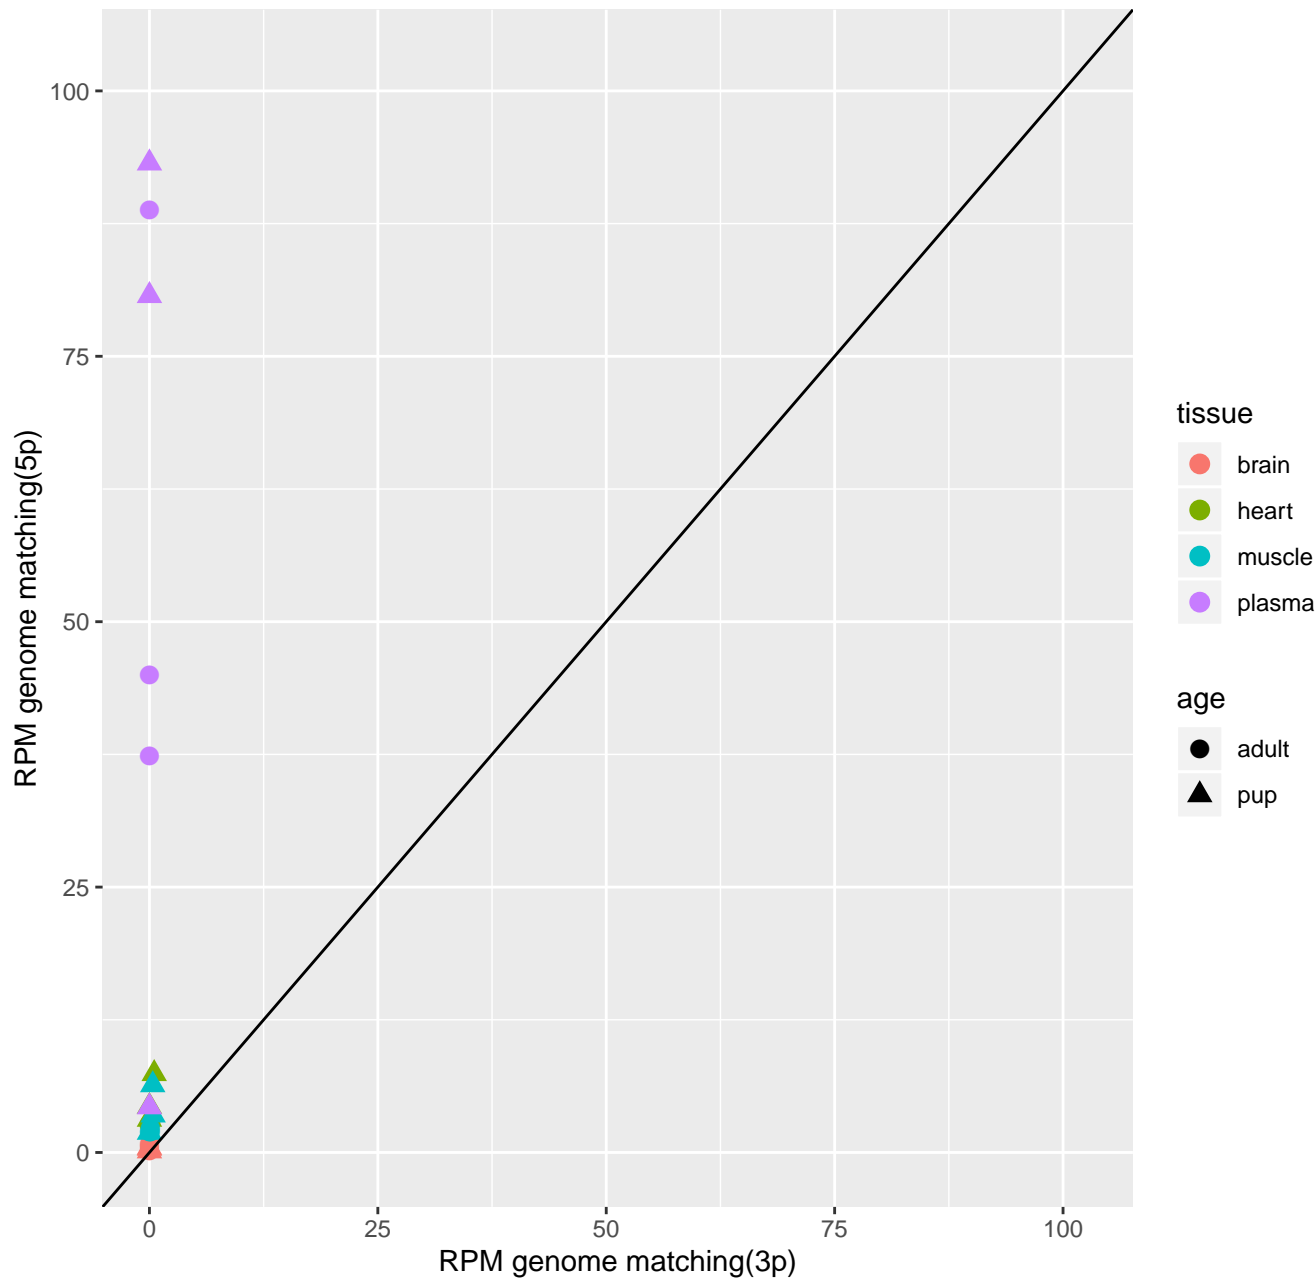

## lwe-miR-452\_loc1

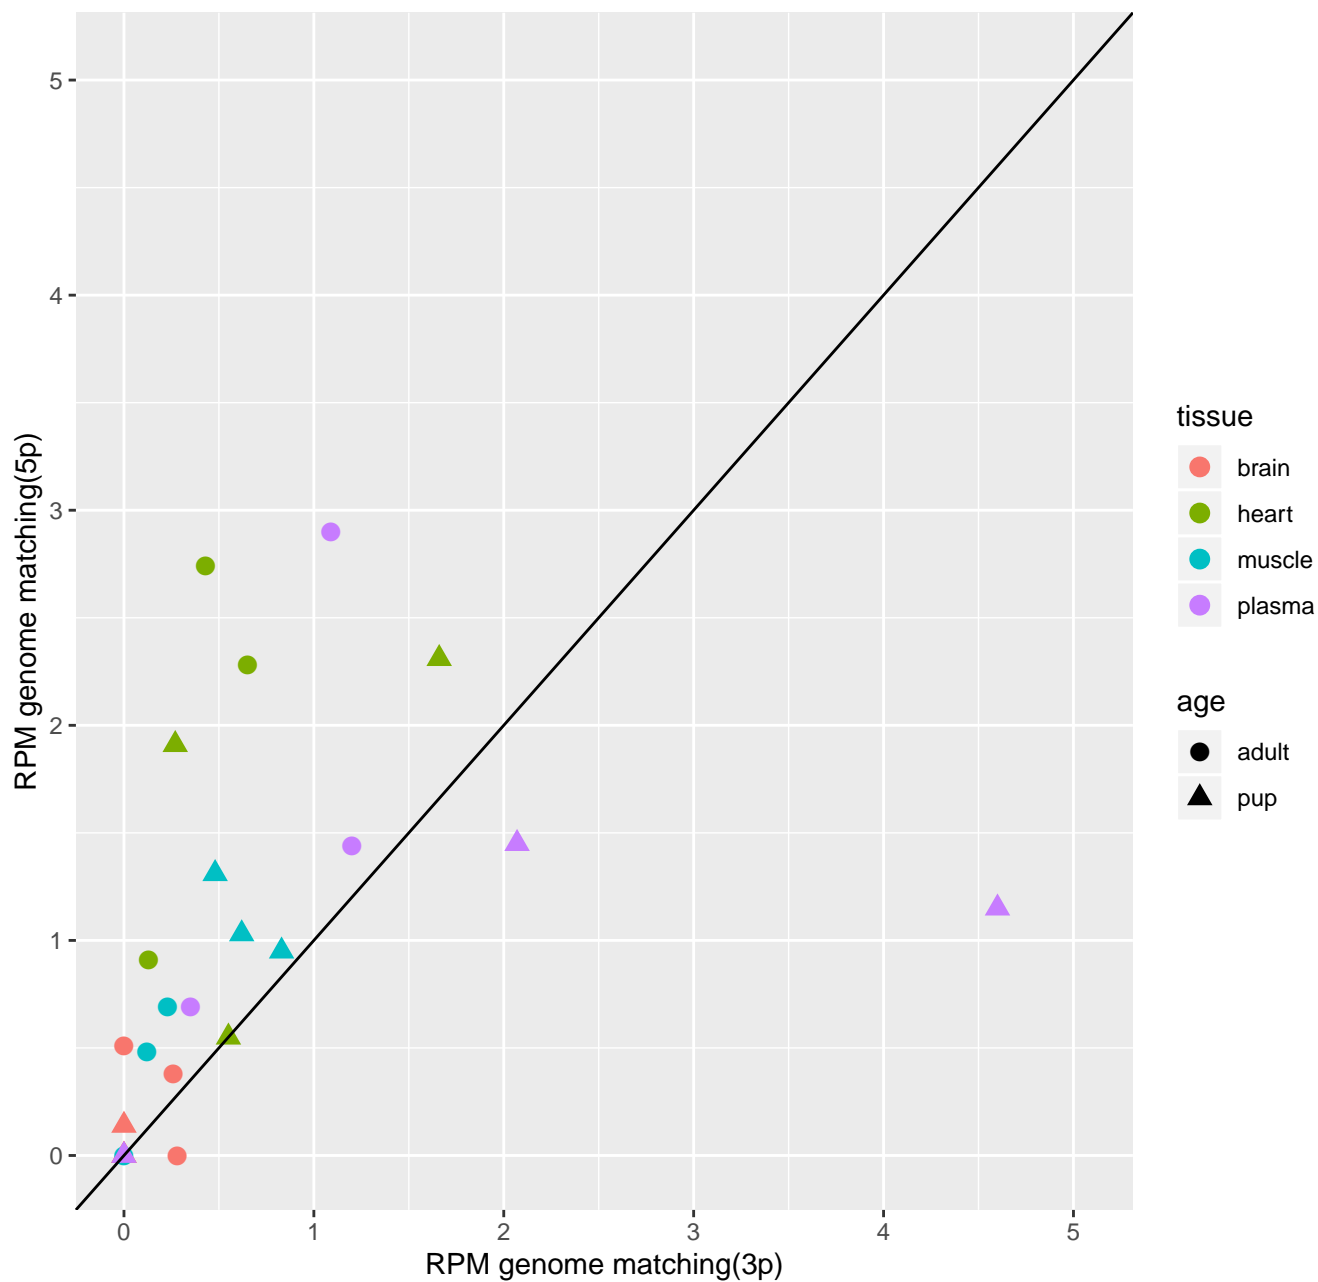

novel\_47

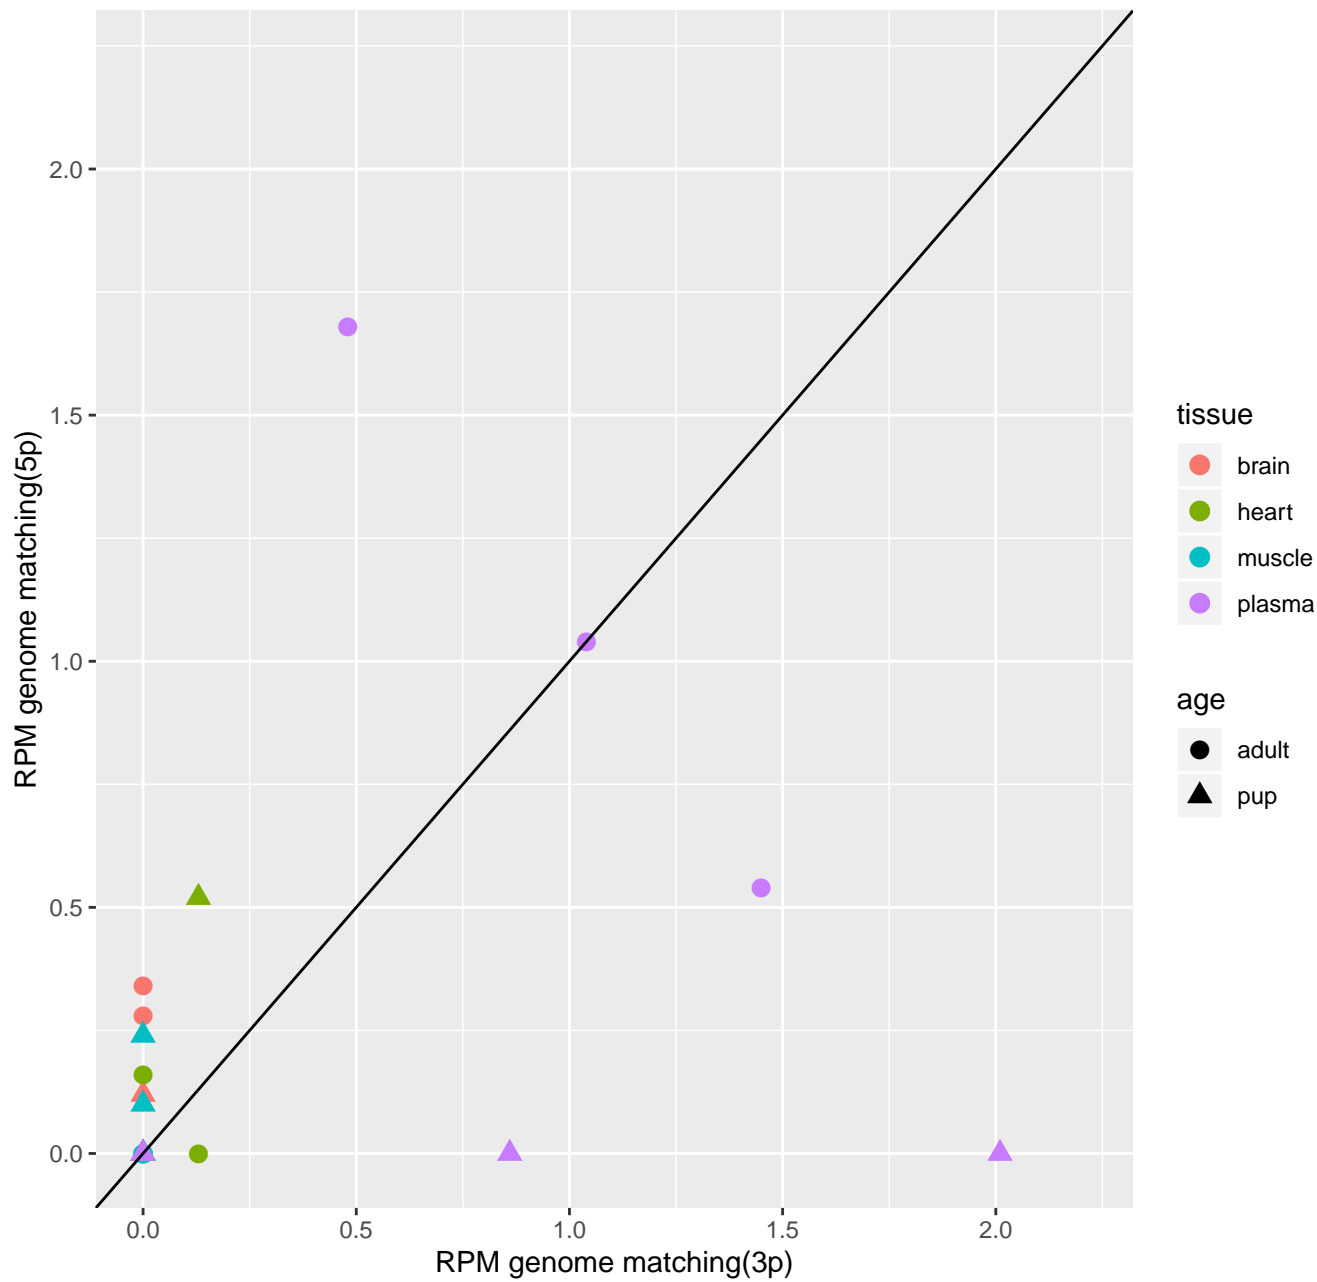

## lwe-miR-9b\_loc2

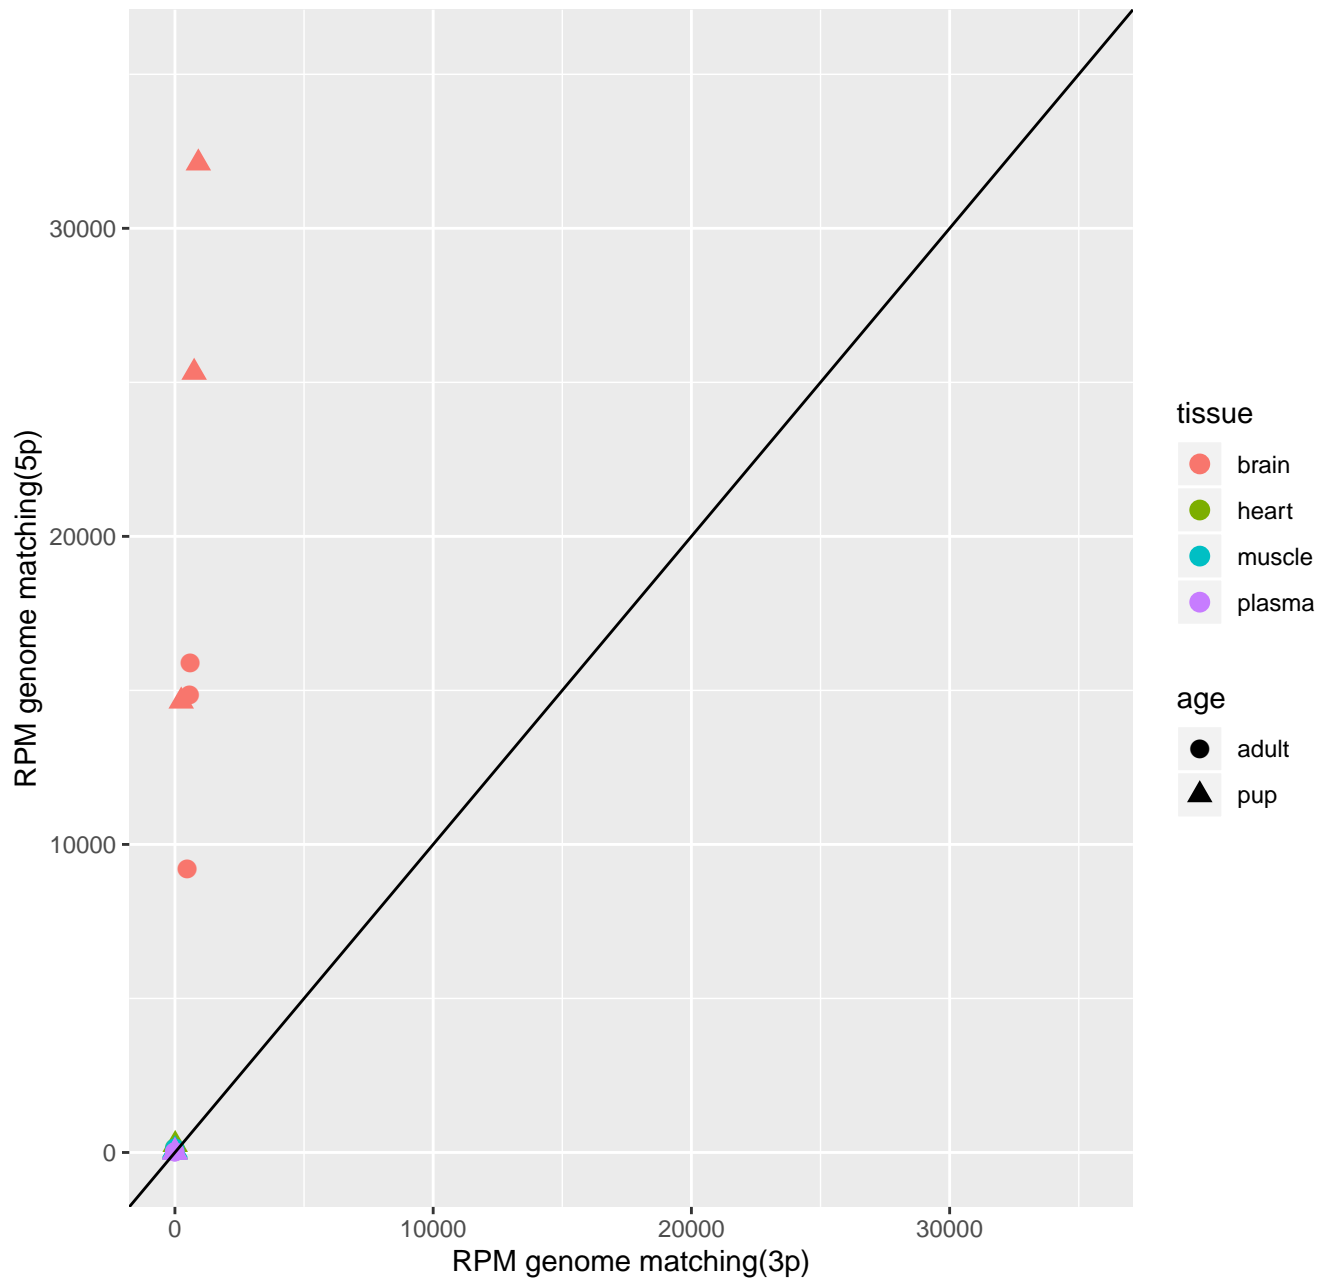



## novel\_48

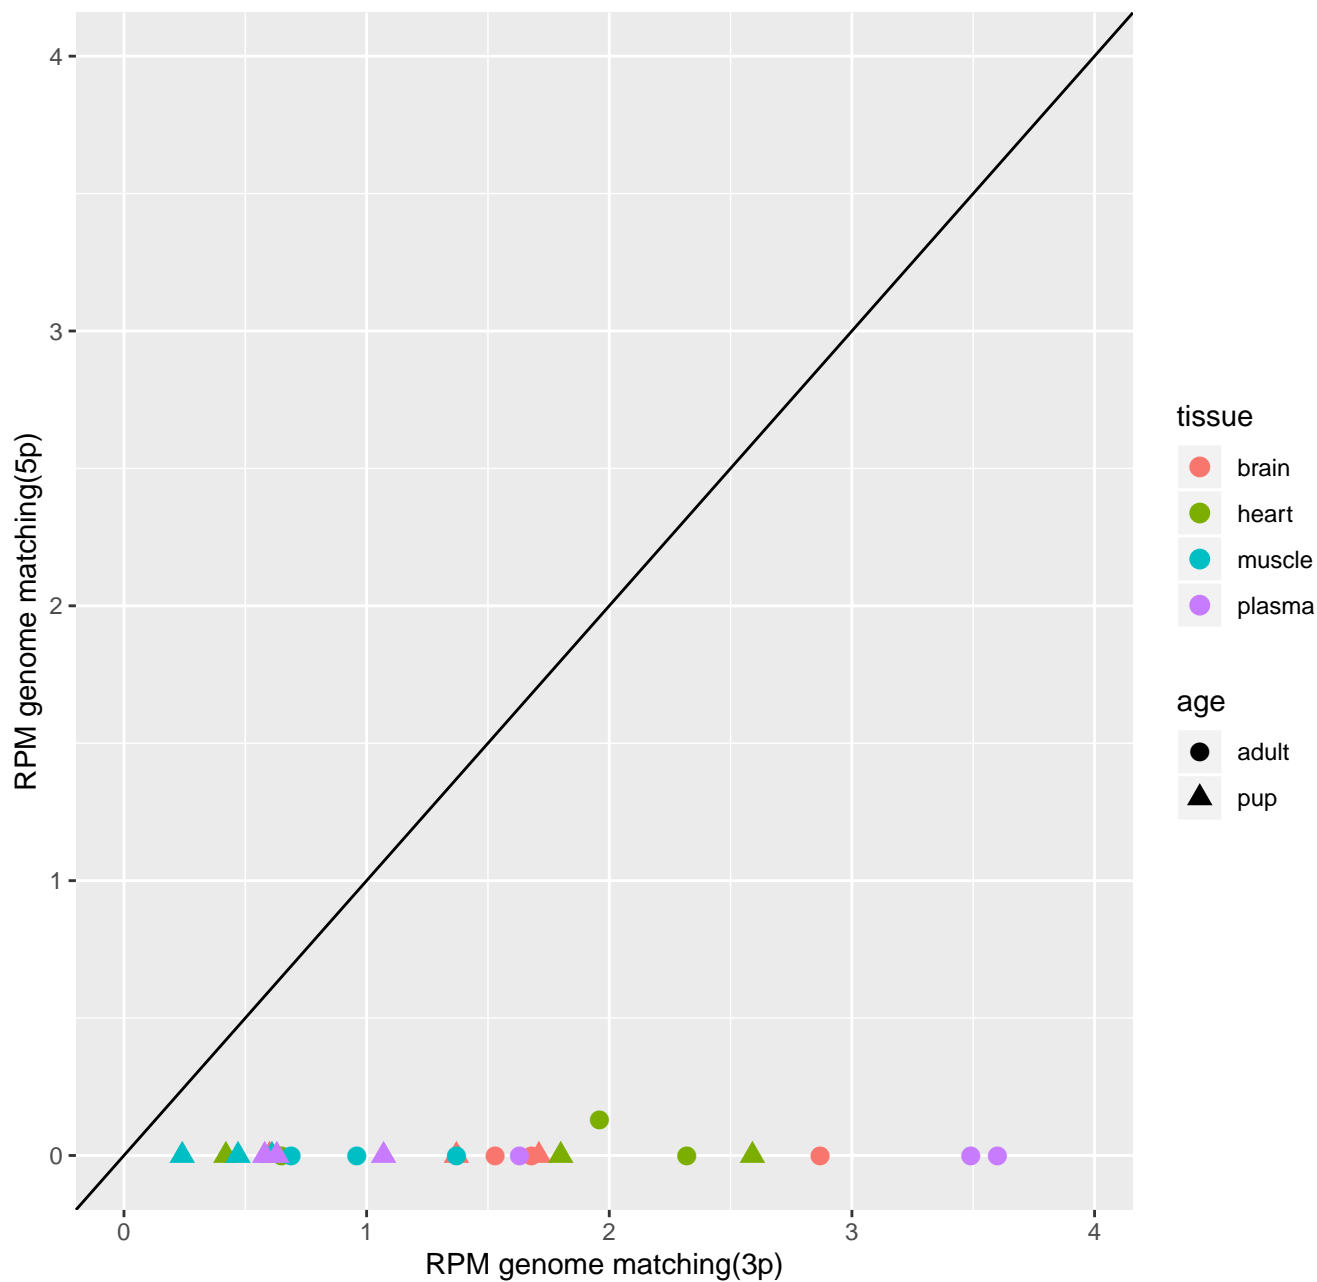

## novel\_49

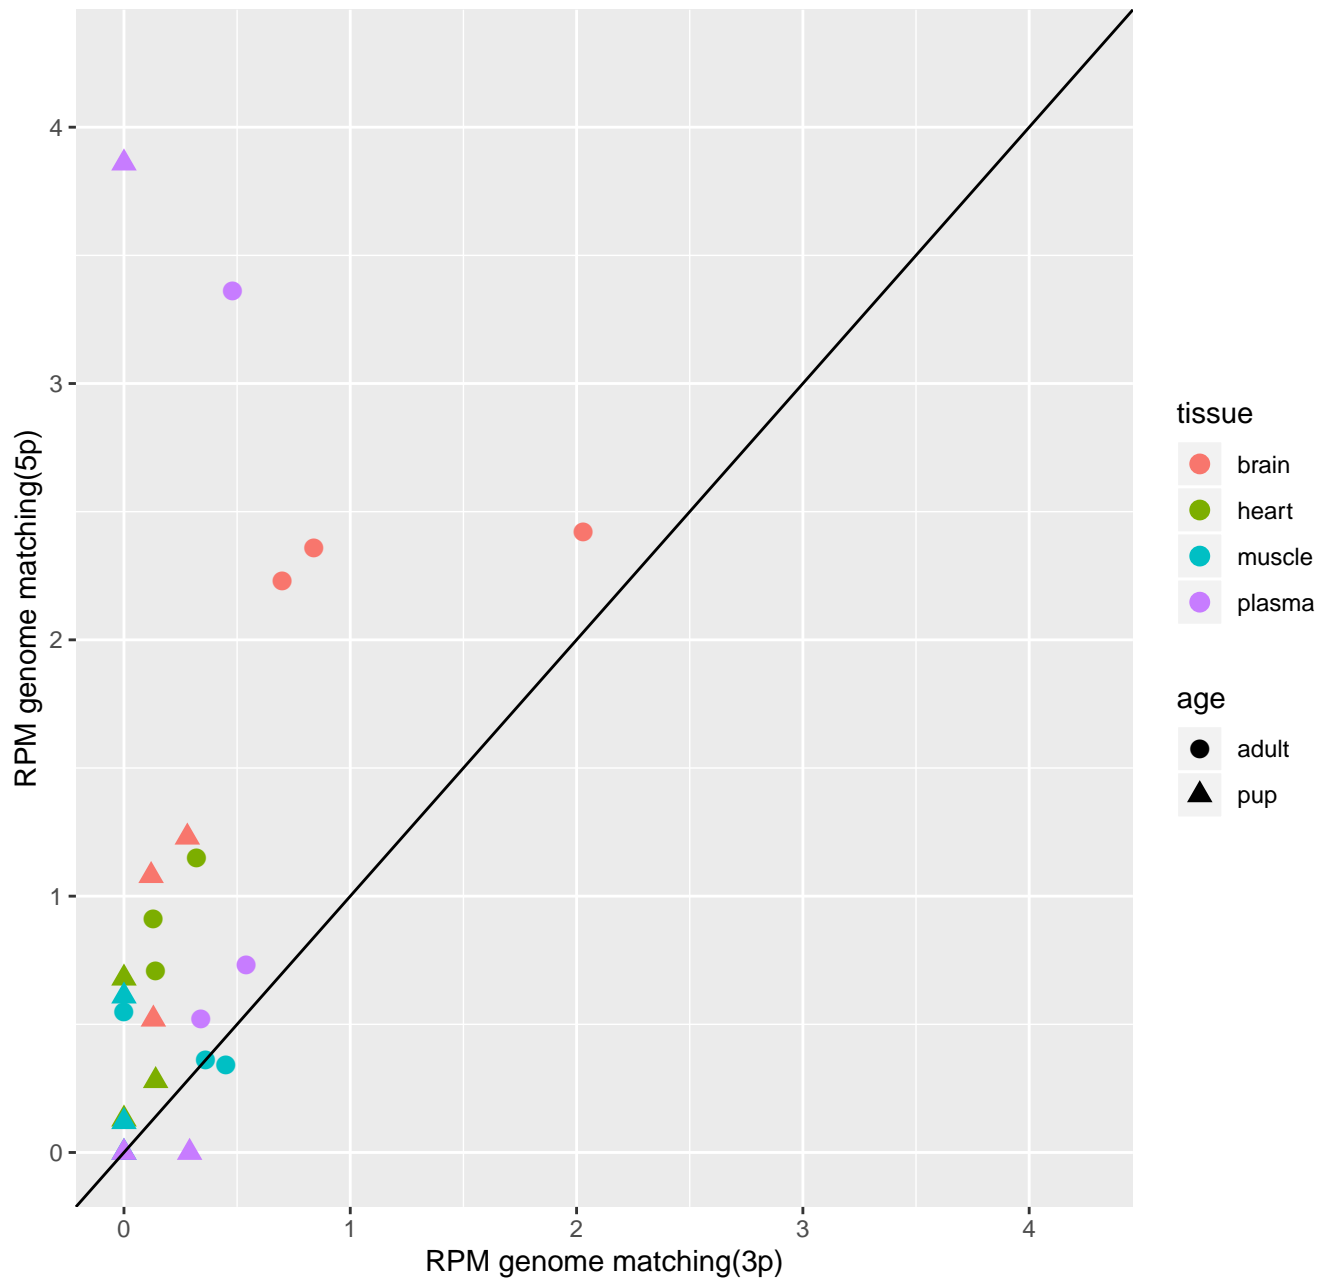

# lwe-miR-135\_loc2

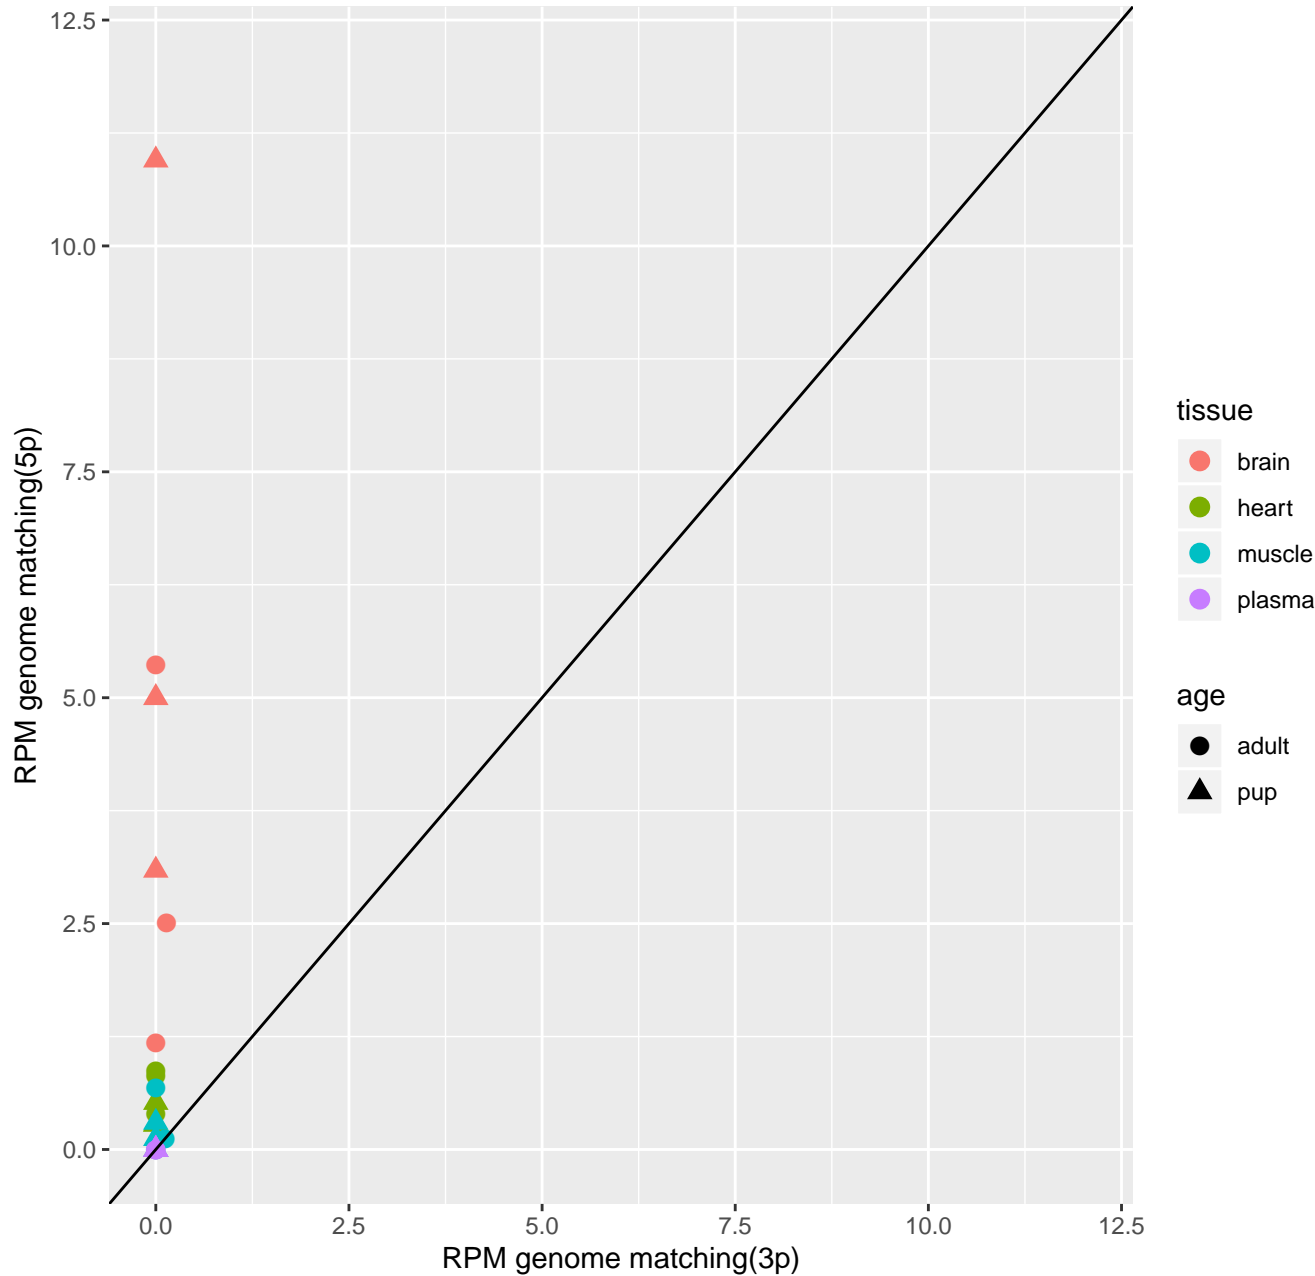

## lwe-miR-16\_loc1

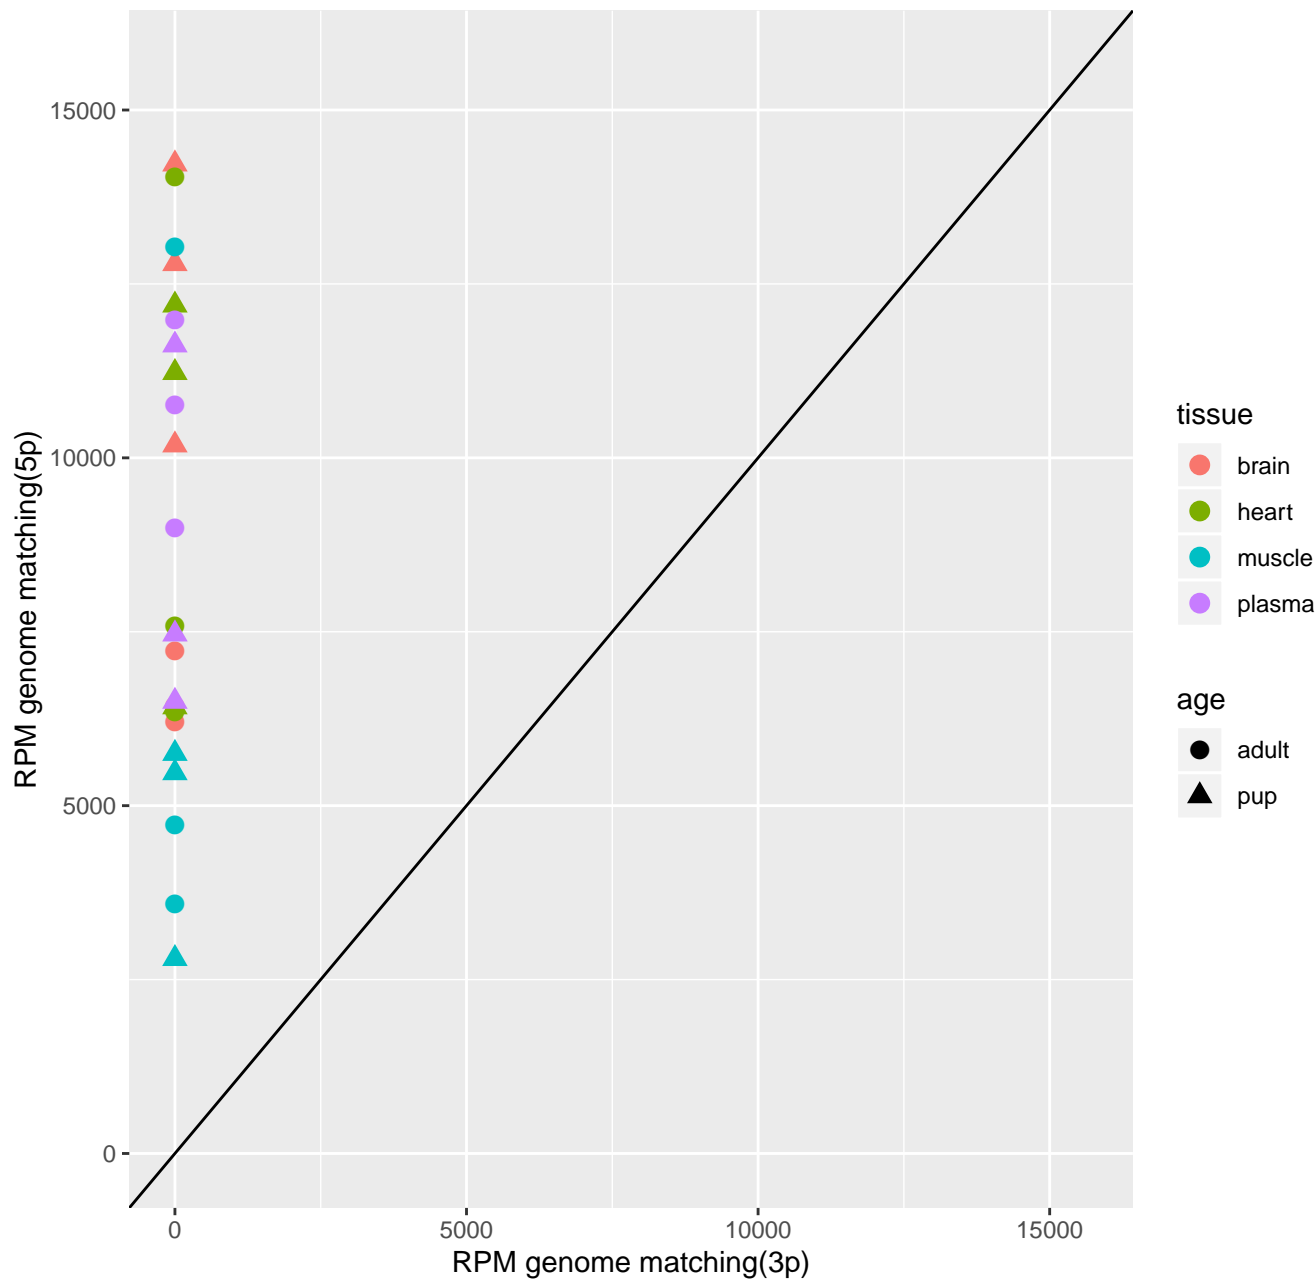

## lwe-miR-3613\_loc1

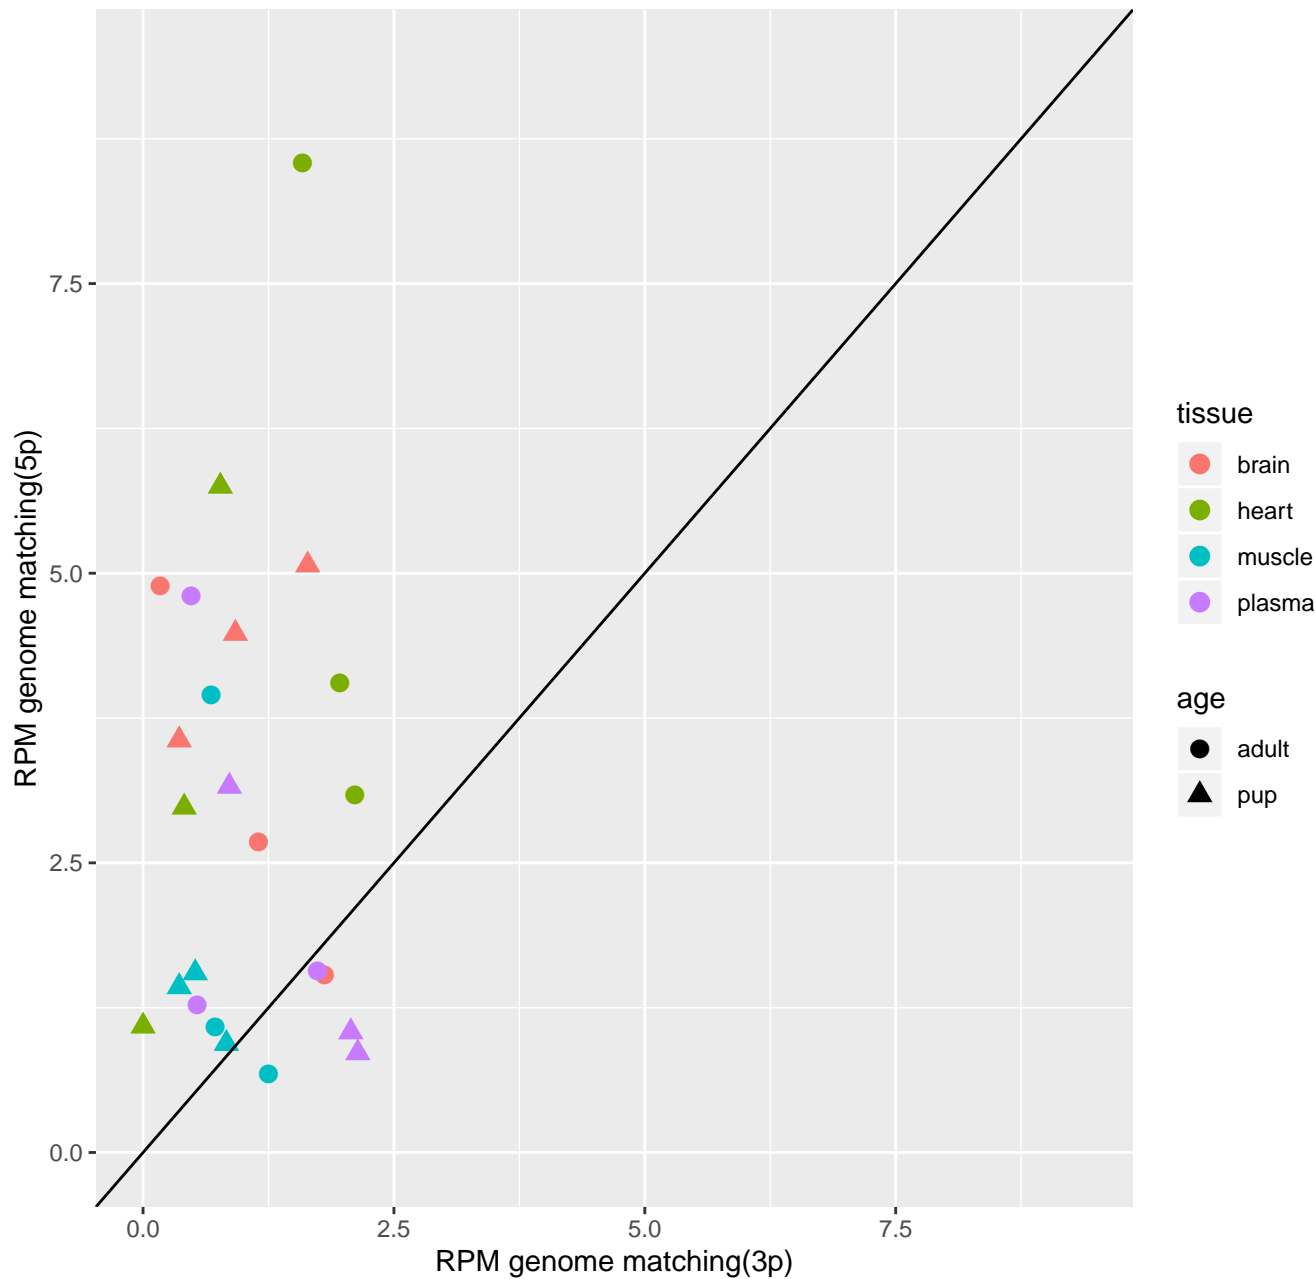

## lwe-miR-339\_loc1

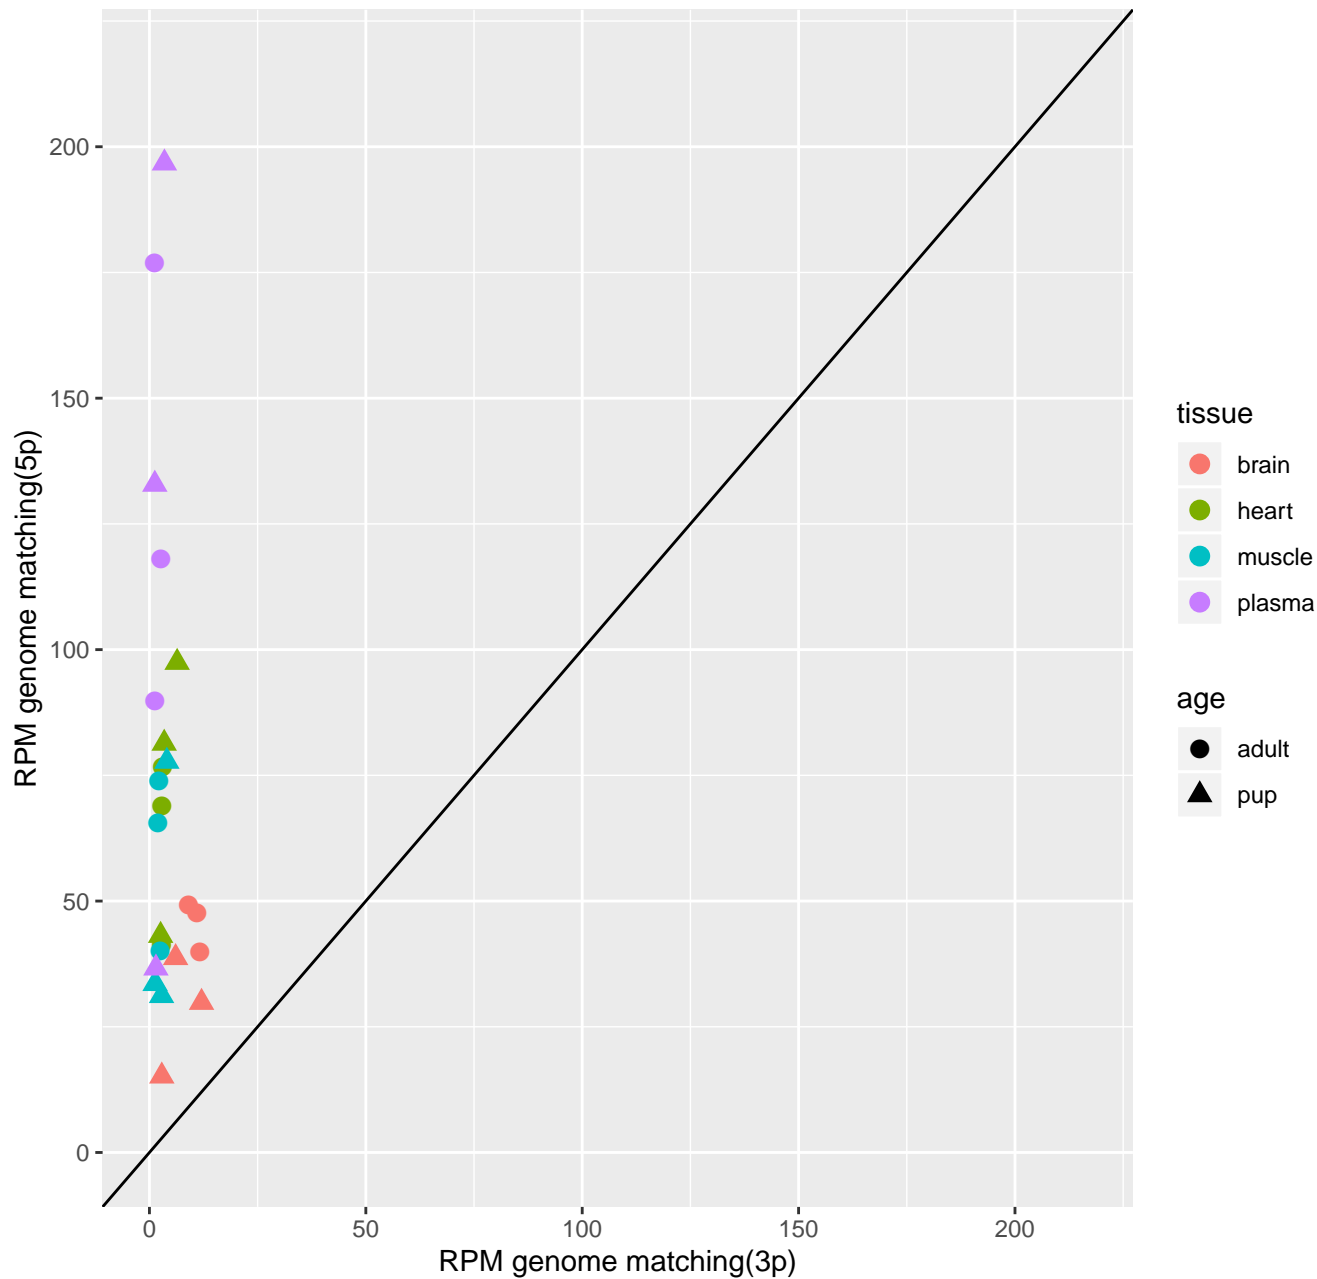

## novel\_51

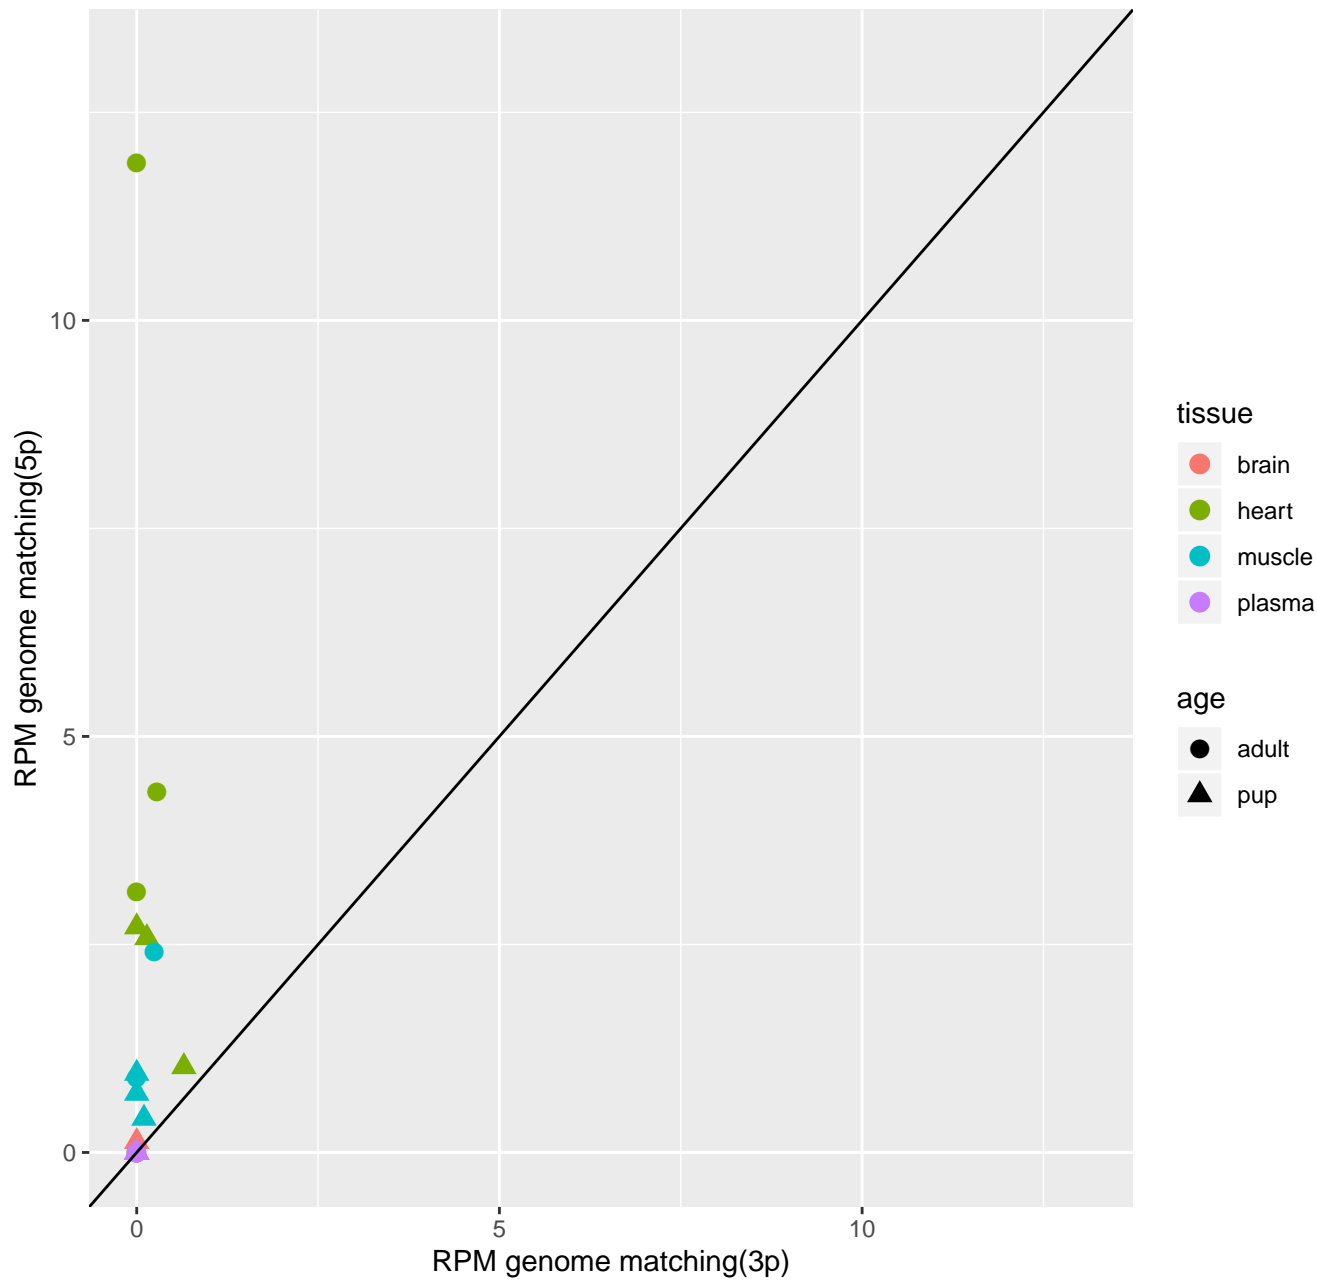





## novel\_52

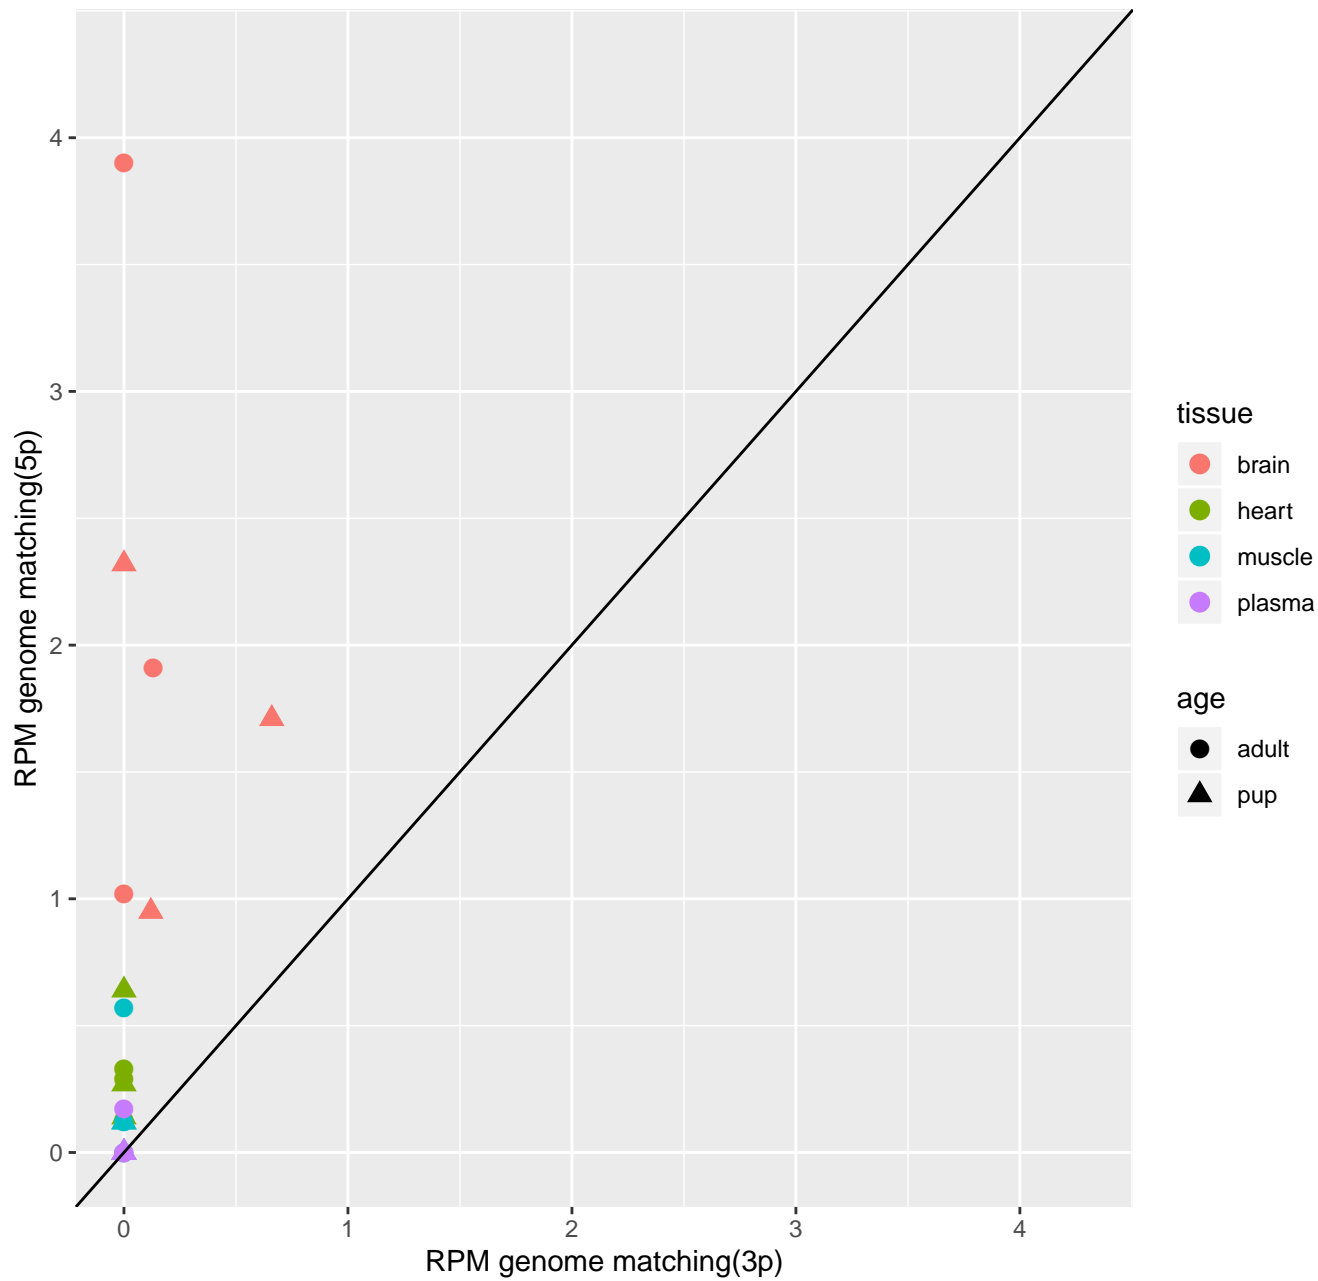

## lwe-miR-513c-1\_loc1

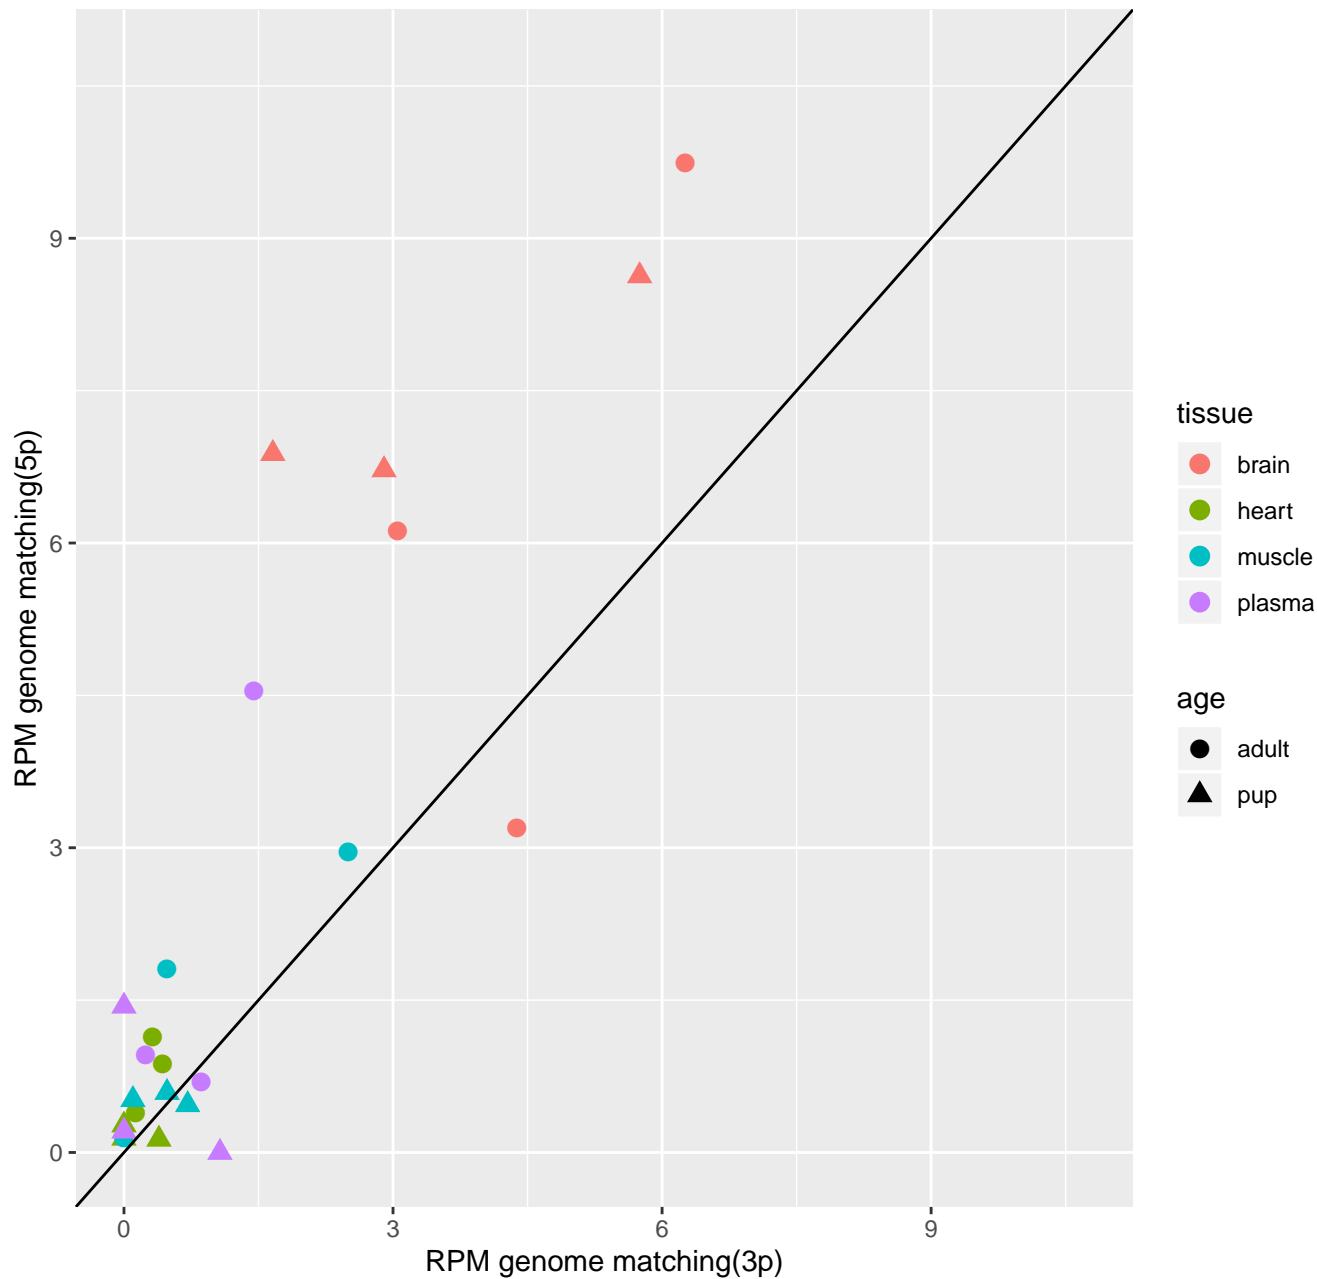

# lwe-miR-506a\_loc1

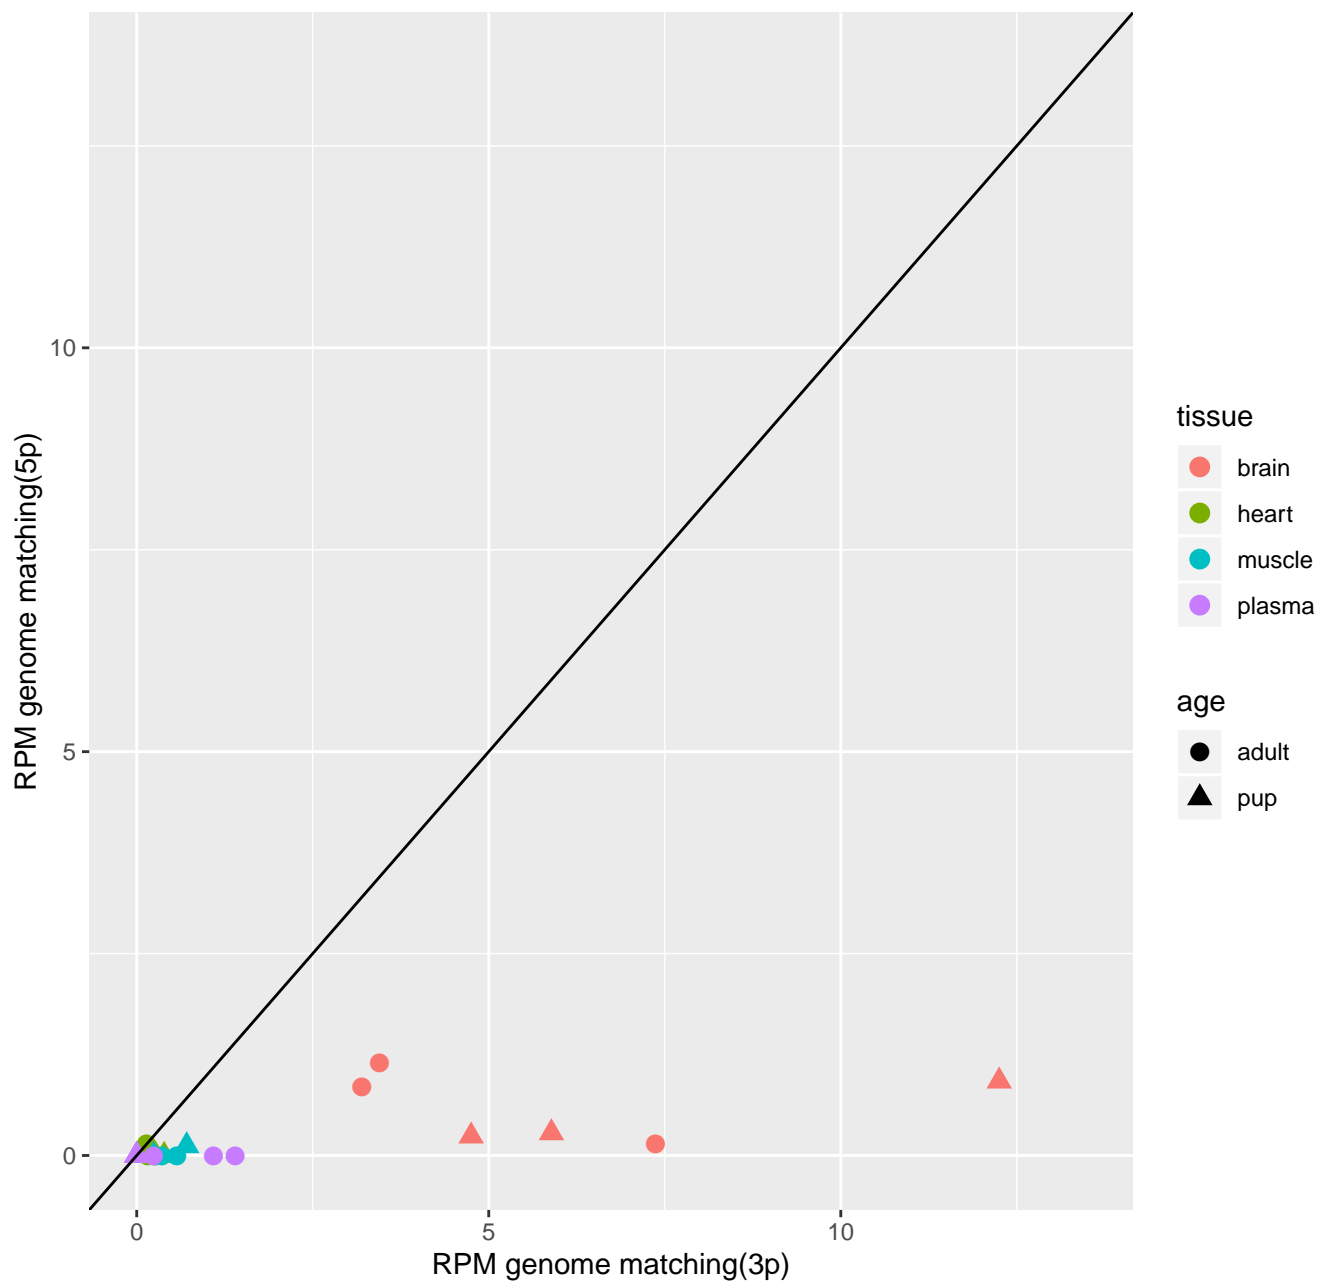

# lwe-miR-514a\_loc1

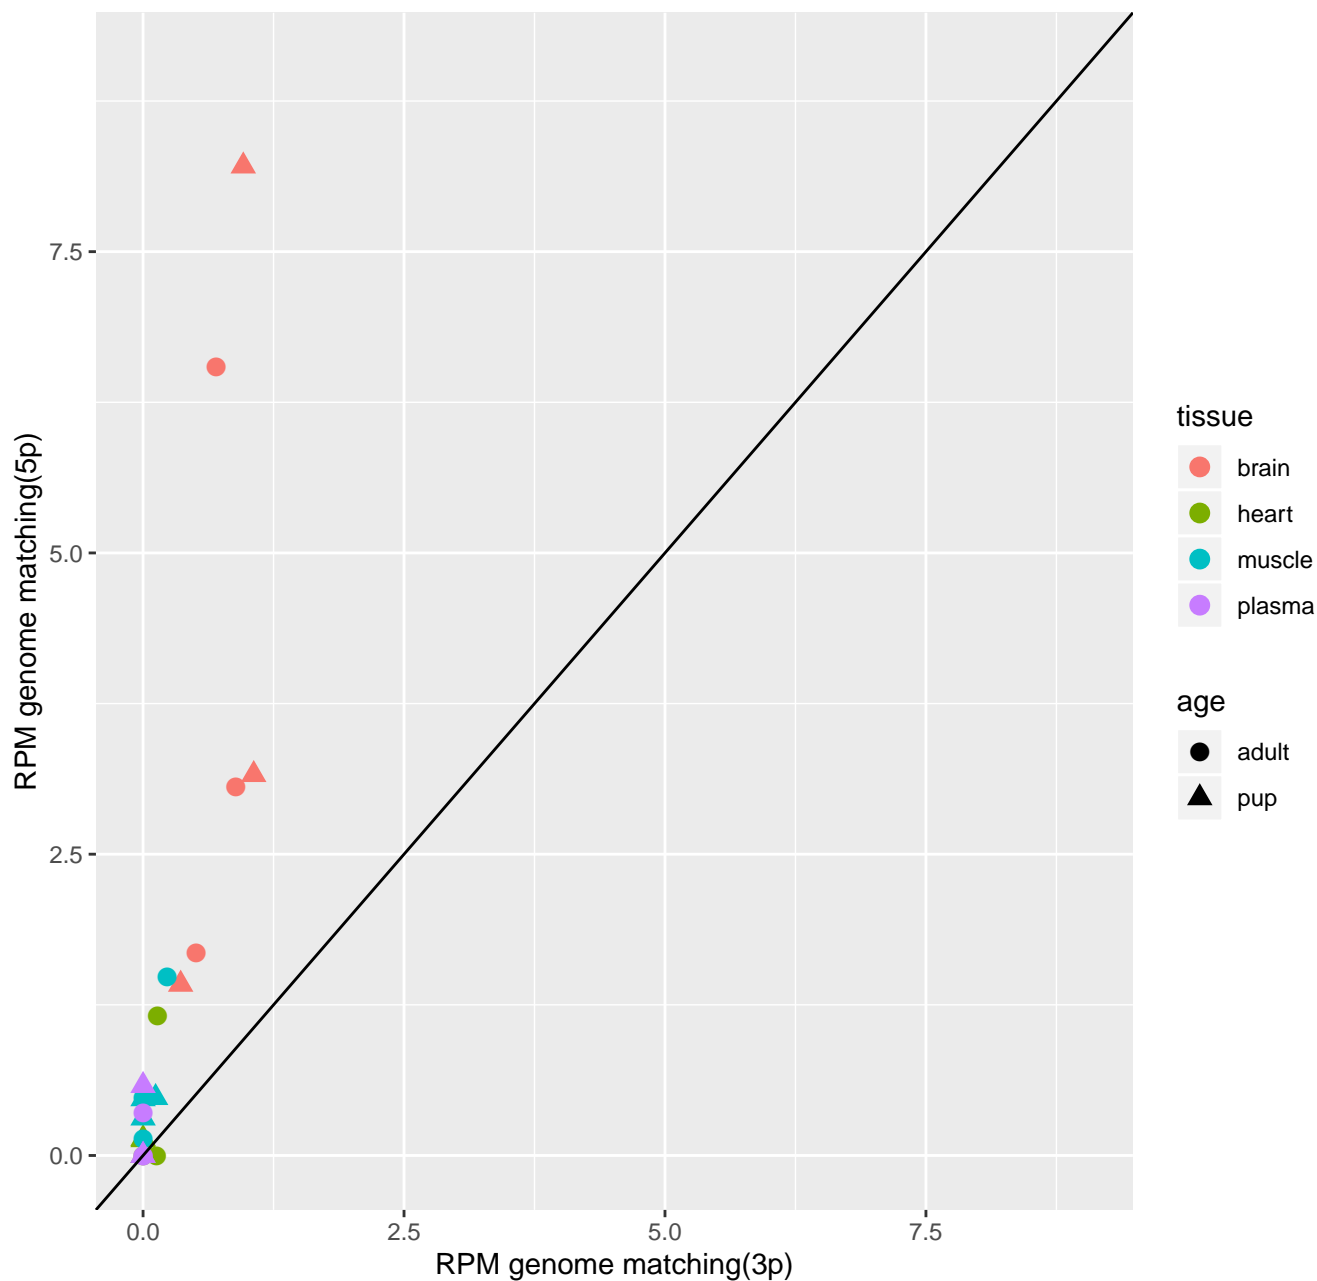

## lwe-miR-509\_loc1

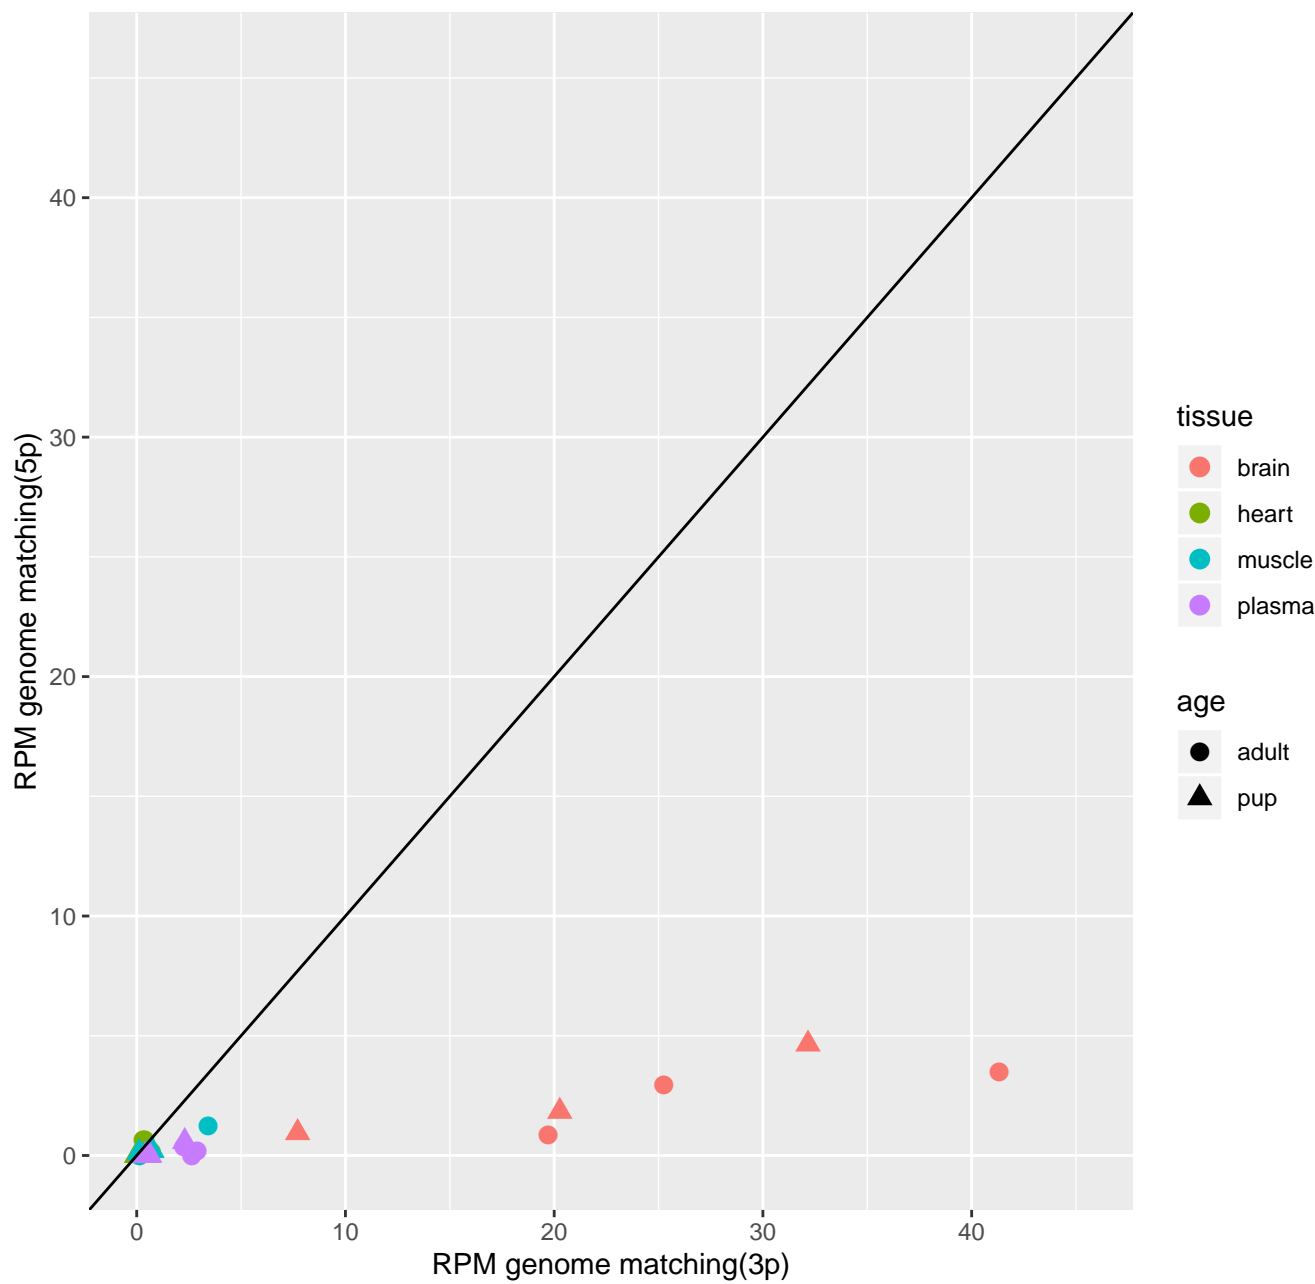

## novel\_55

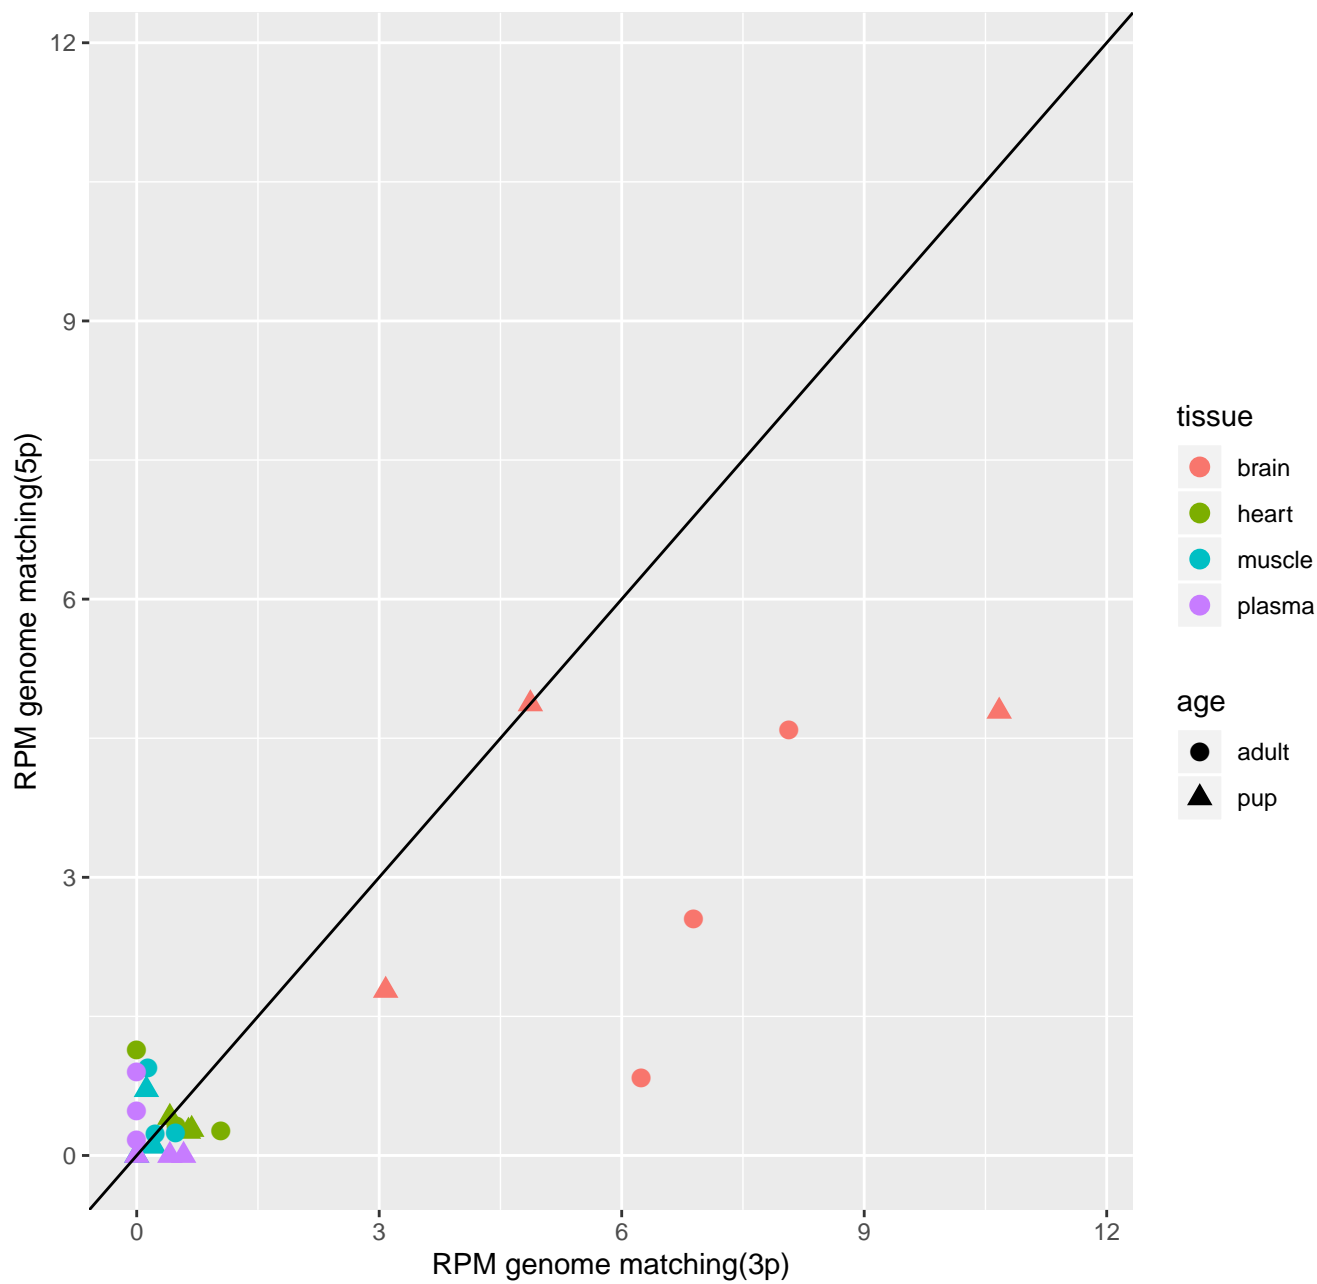

## novel\_56

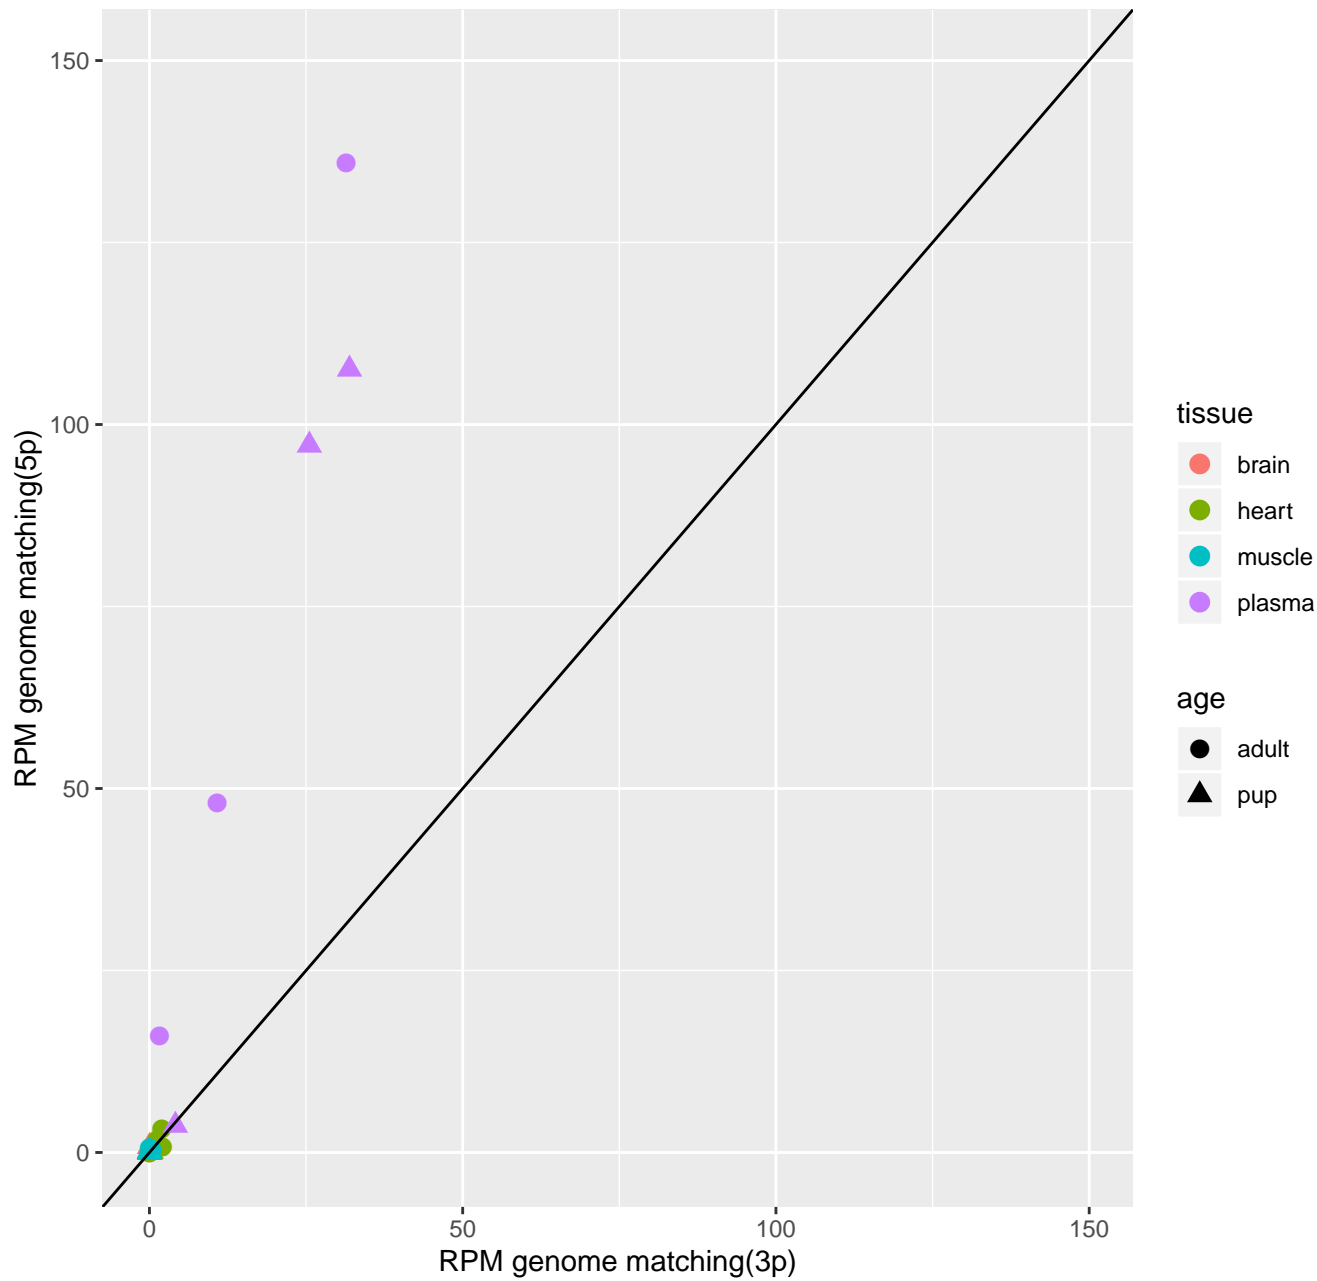

# lwe-miR-124a\_loc1

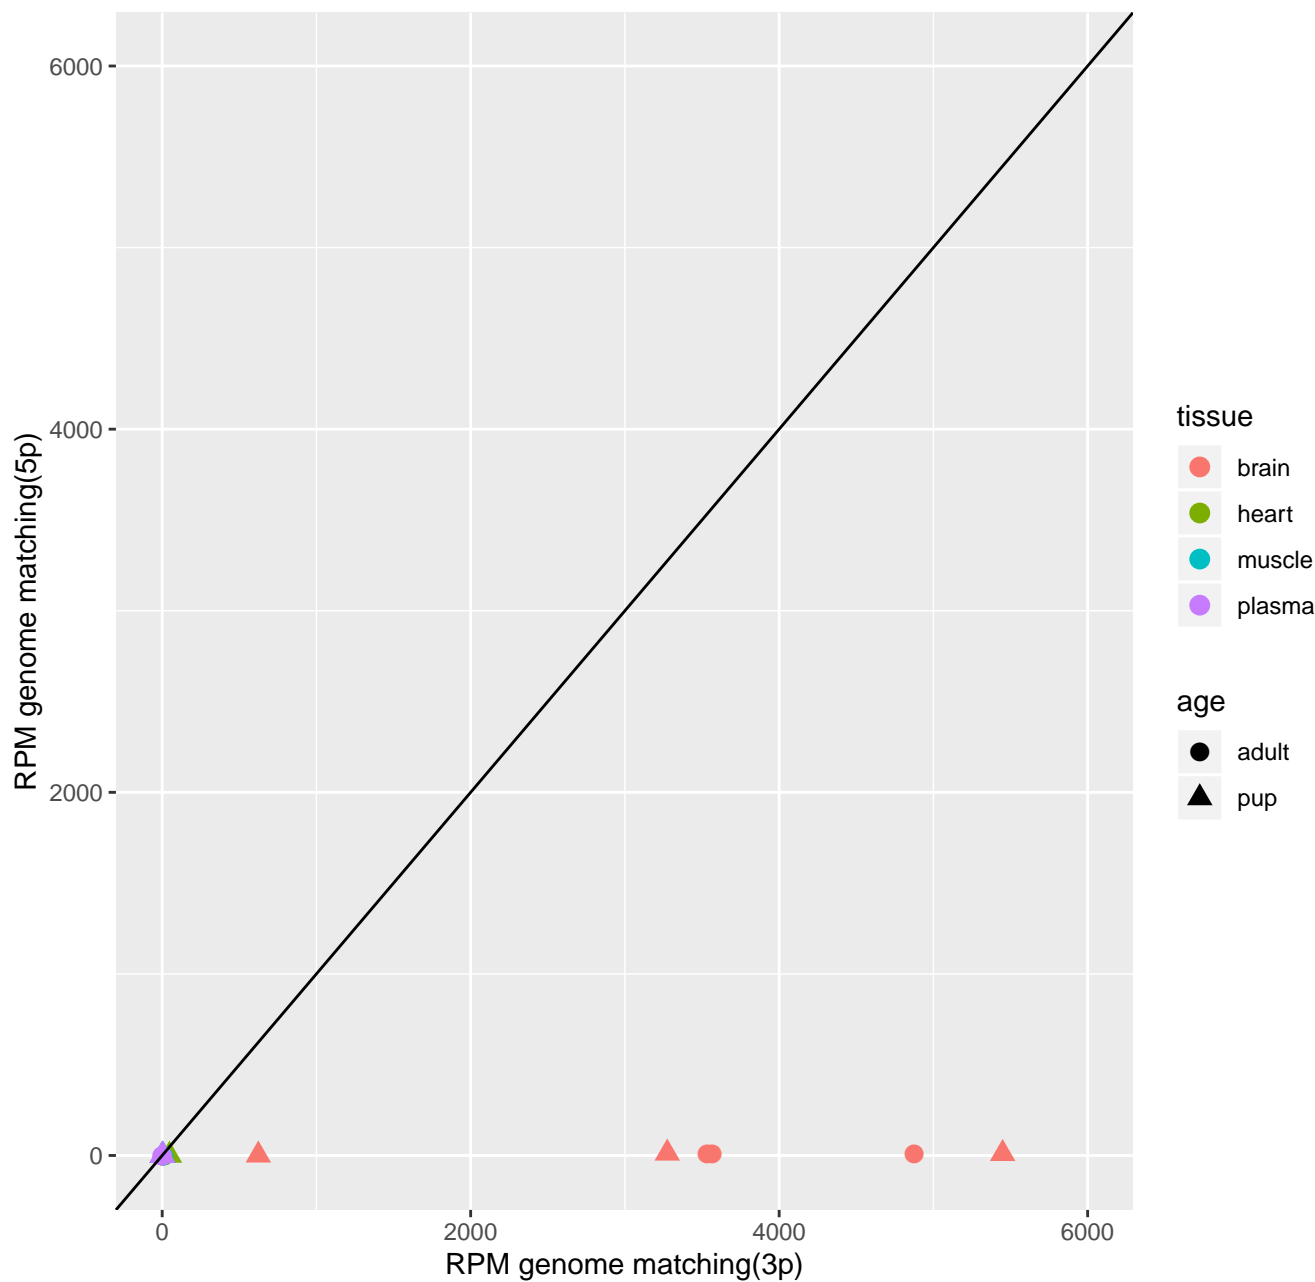



## lwe-miR-199a\_loc1

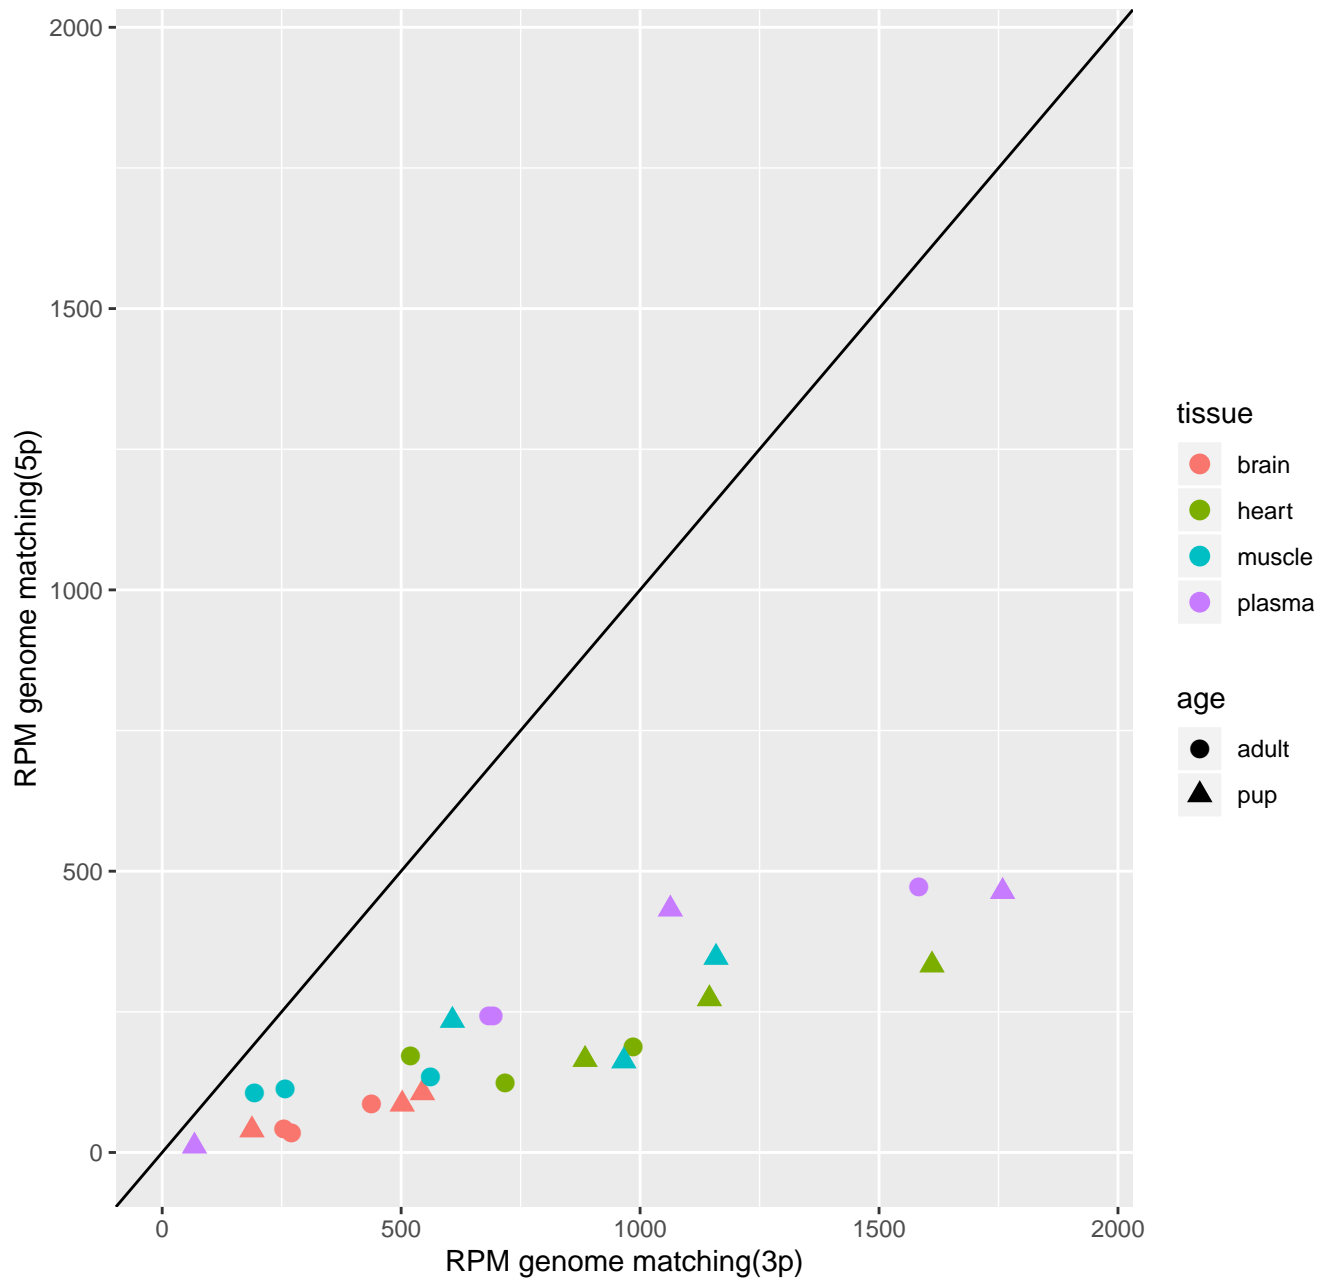

## lwe-miR-3064\_loc1

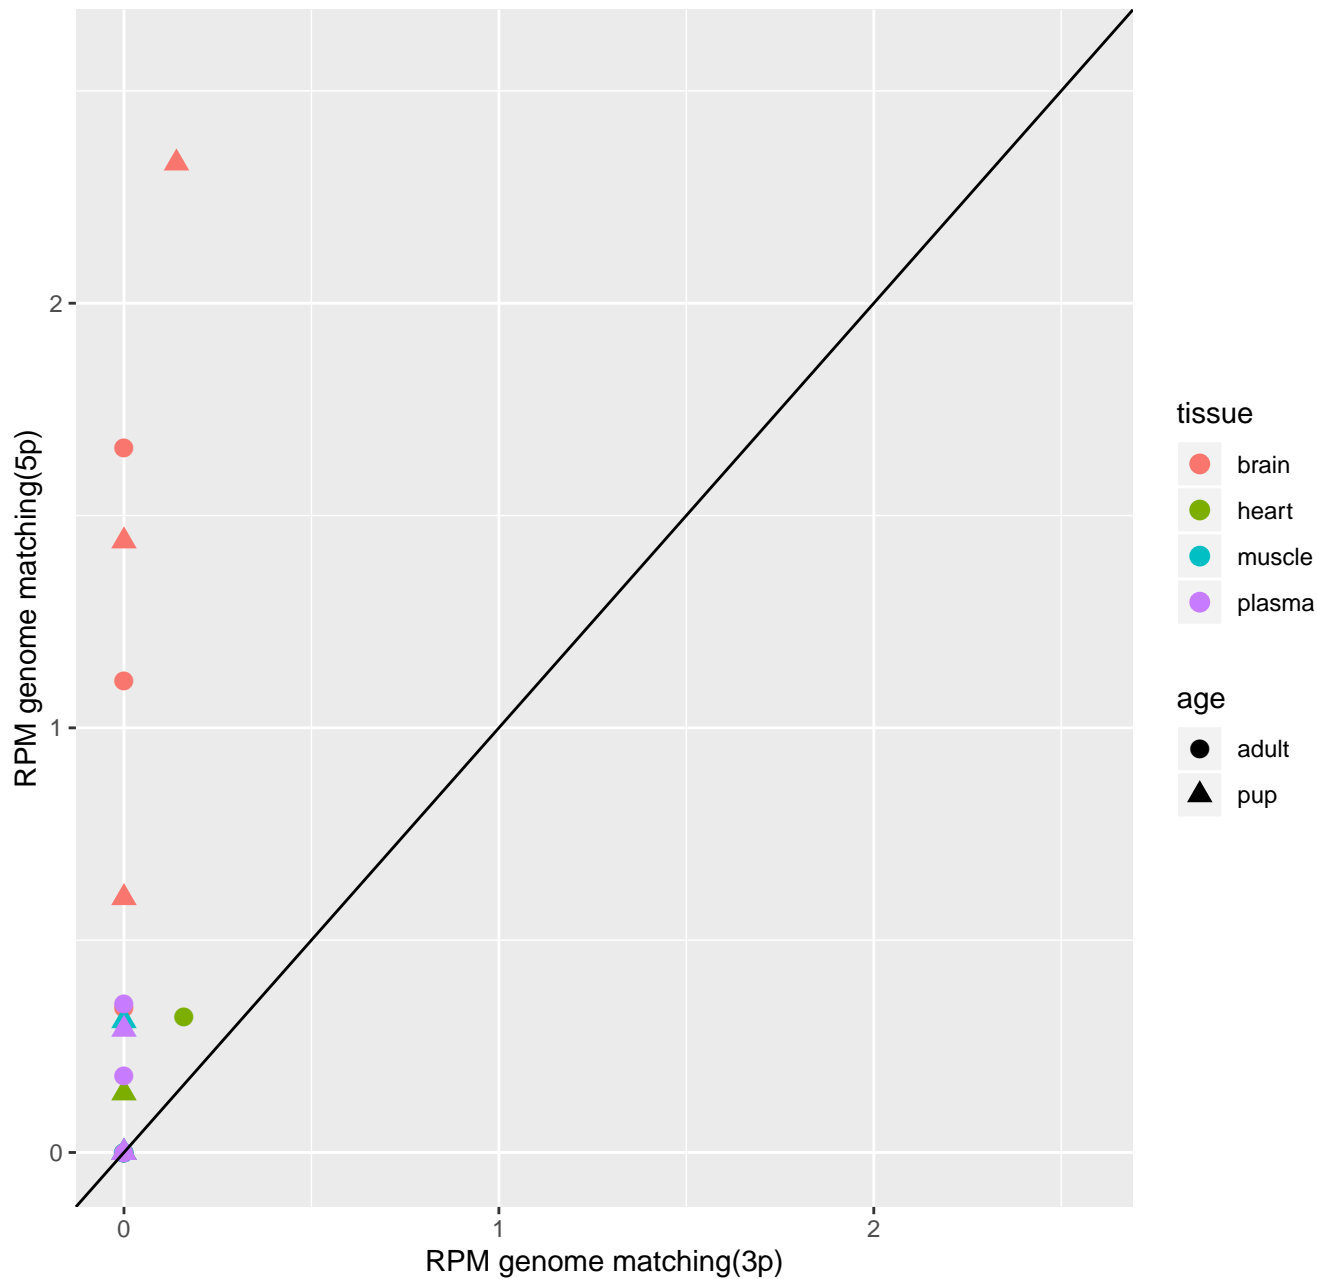

## lwe-miR-125b\_loc1

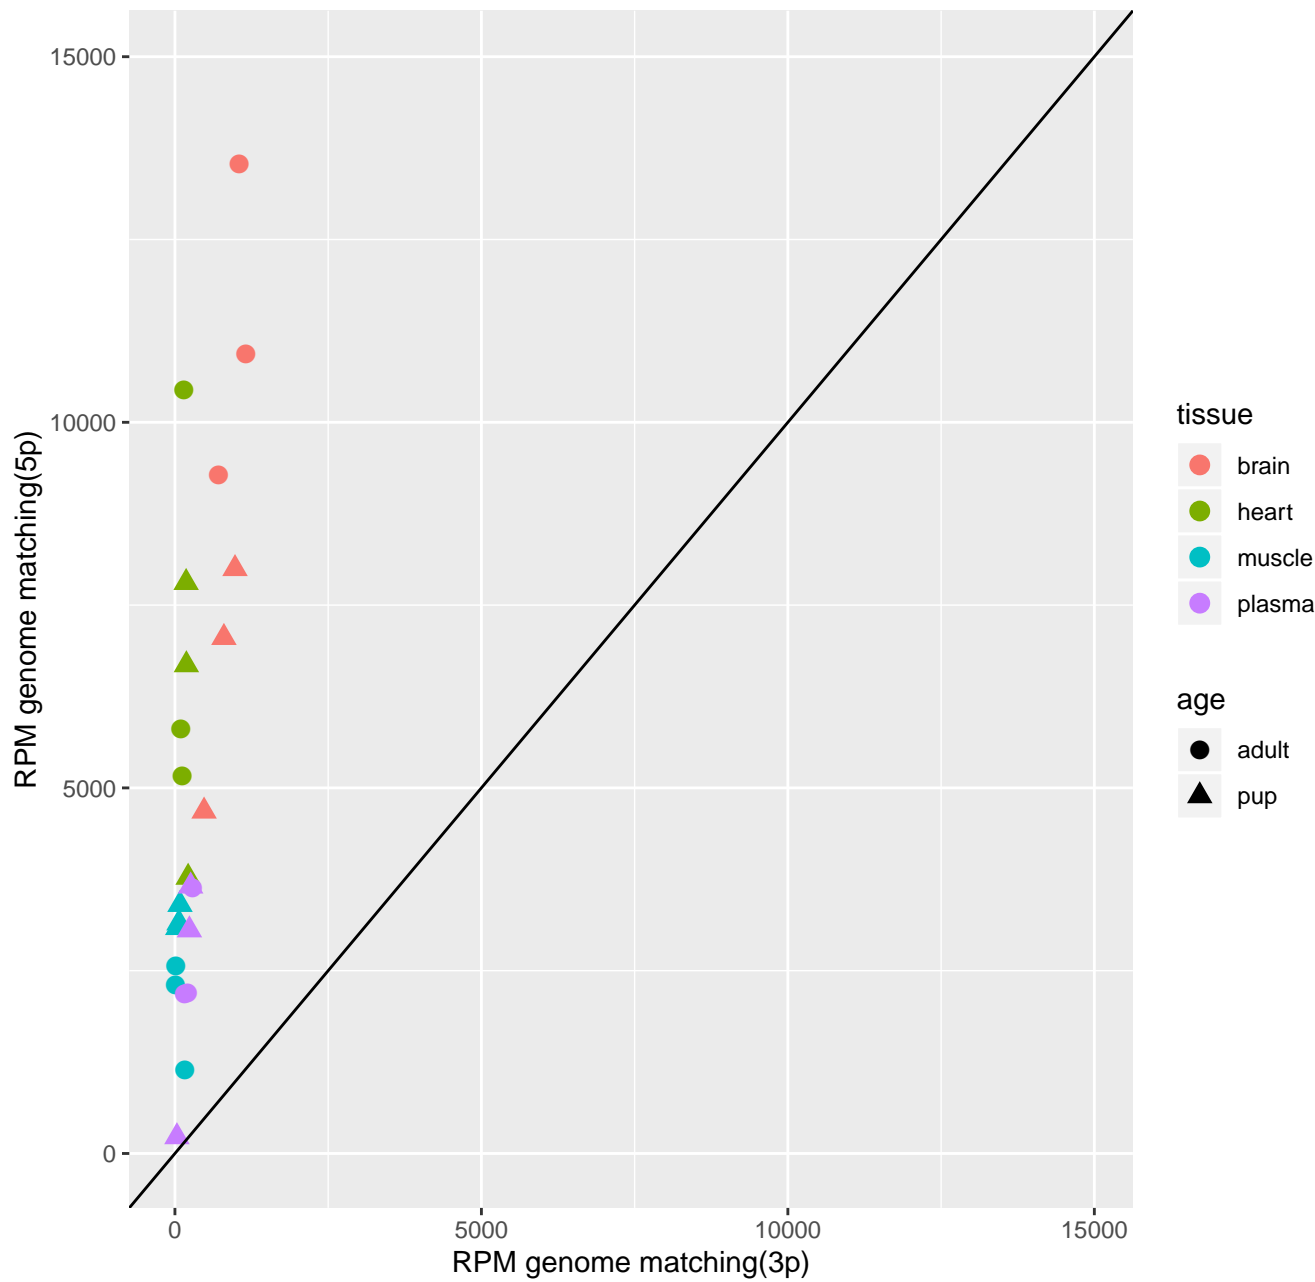

## let-7c\_loc1

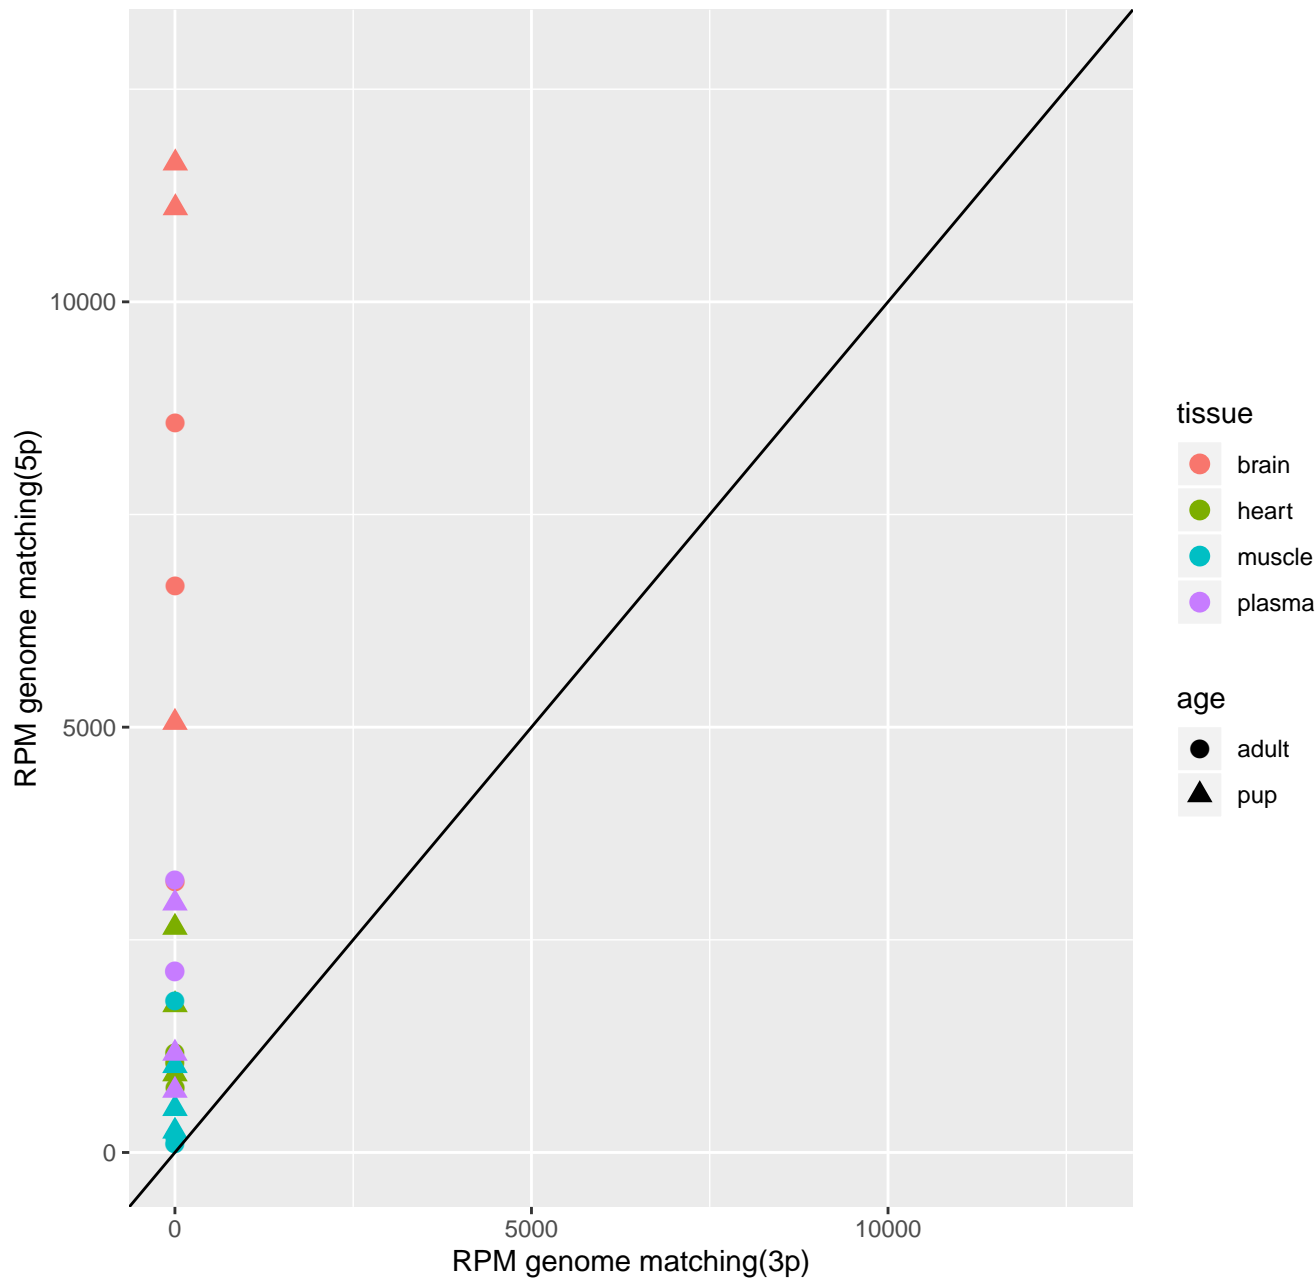

## lwe-miR-99a\_loc1

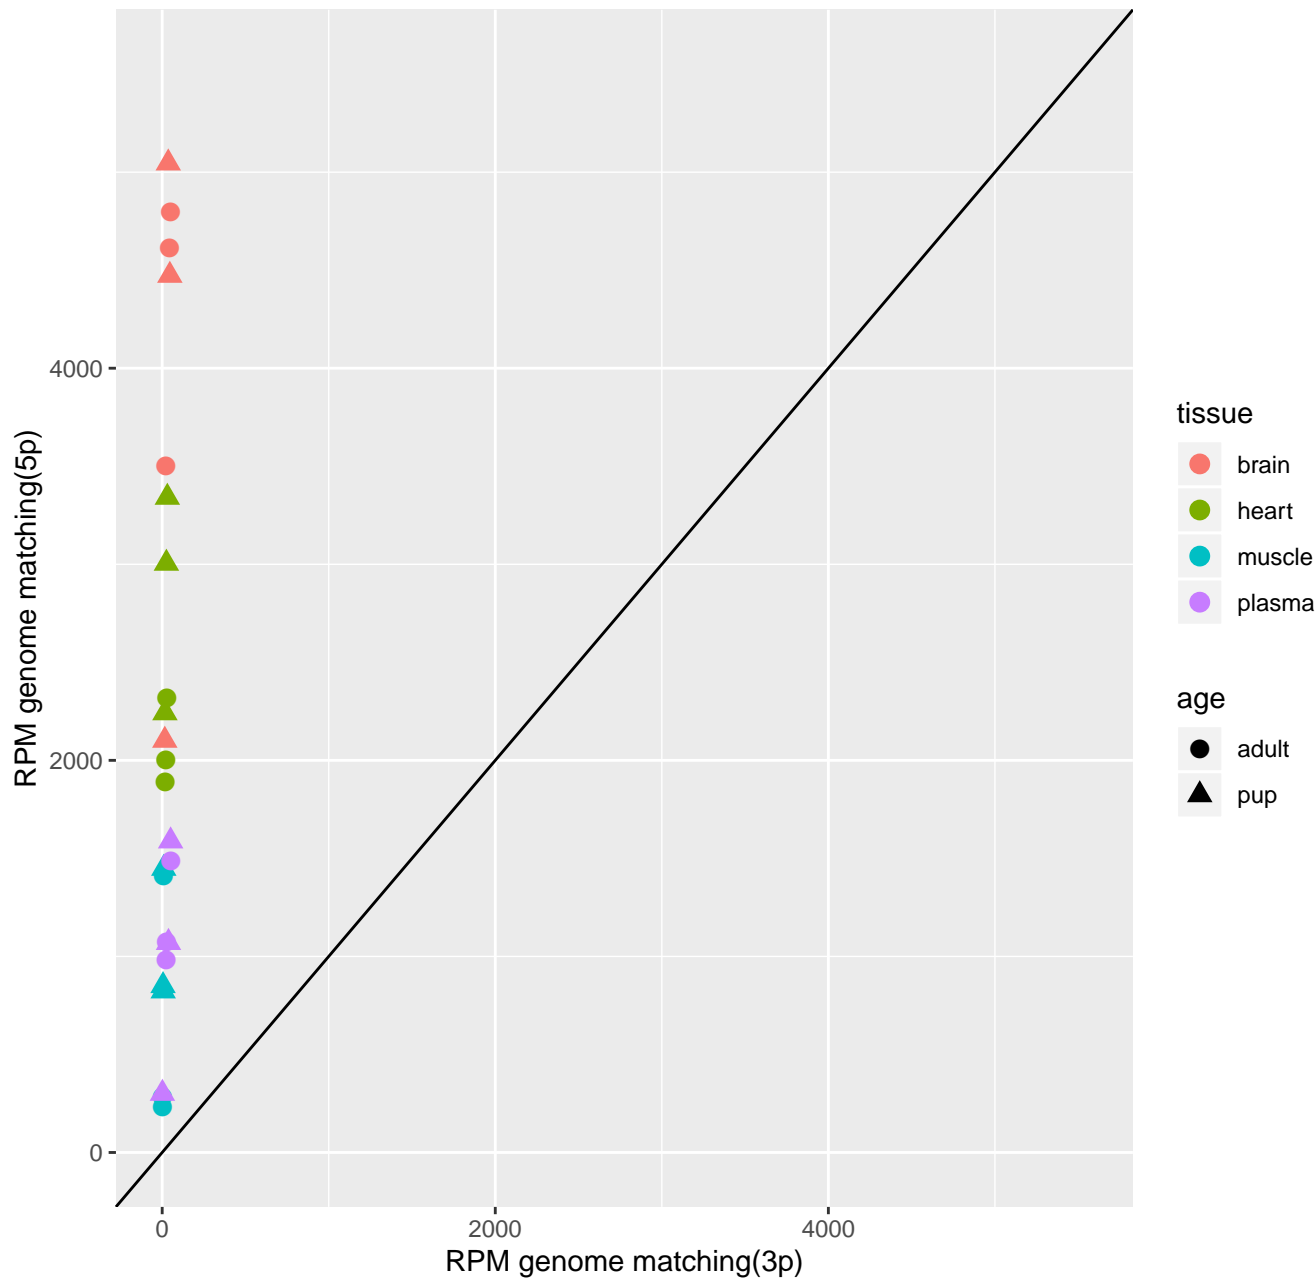

## lwe-miR-128a\_loc2

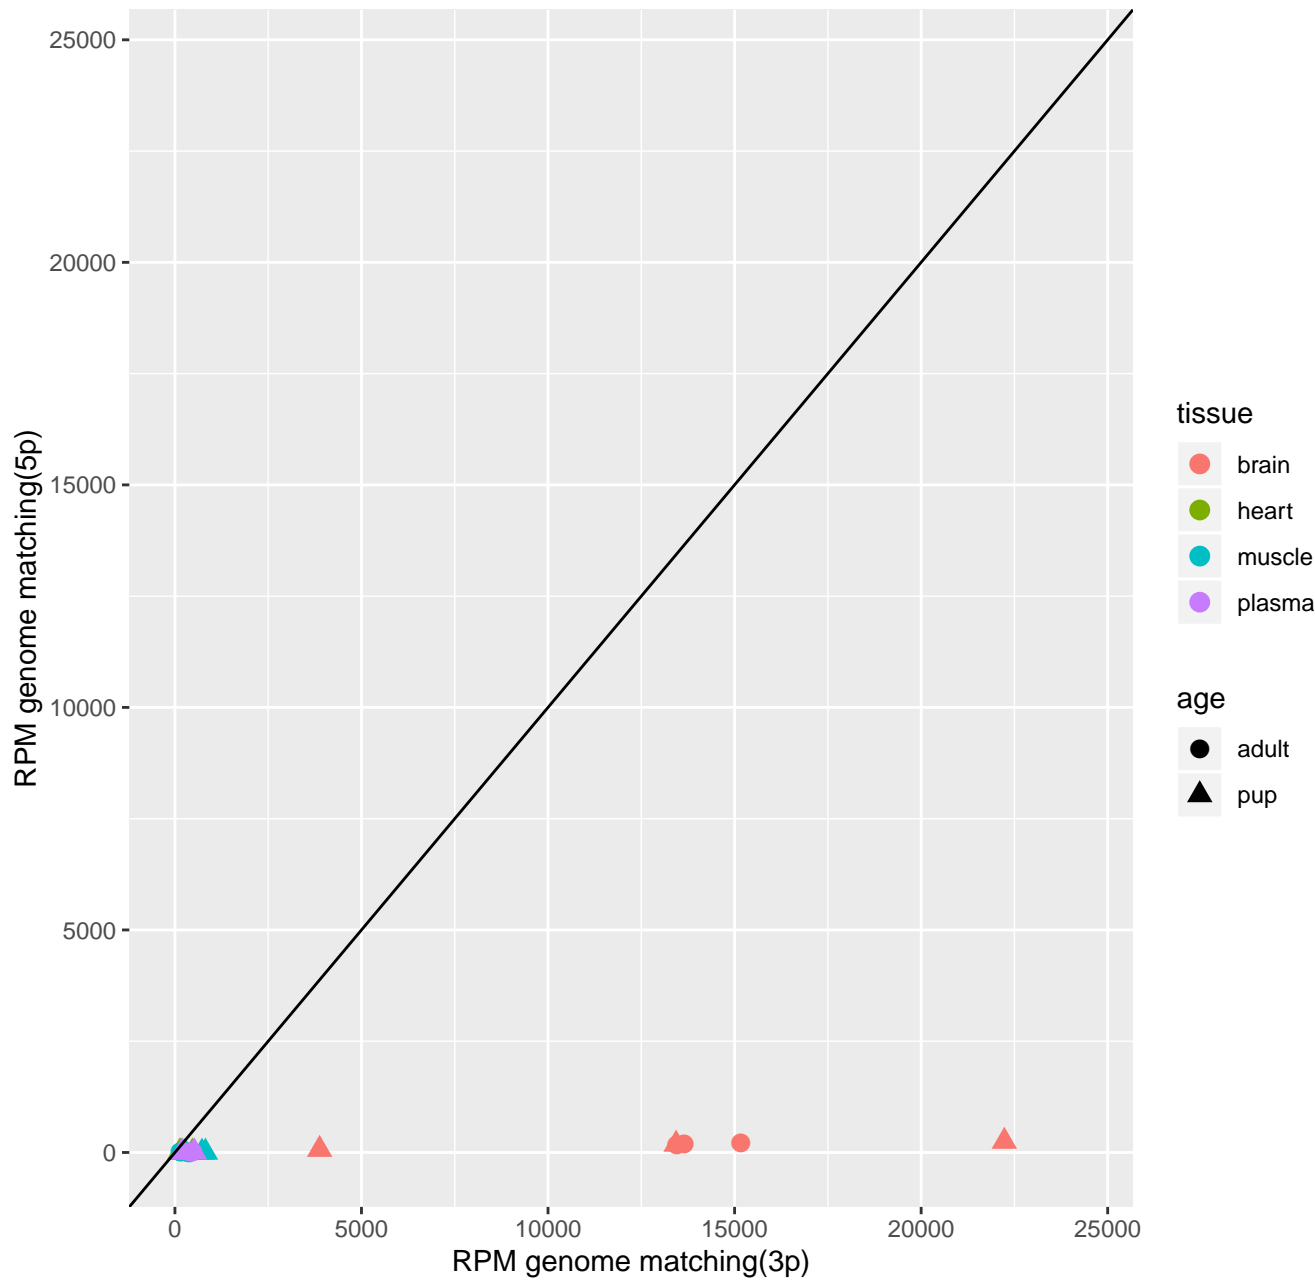

## lwe-miR-200c\_loc1

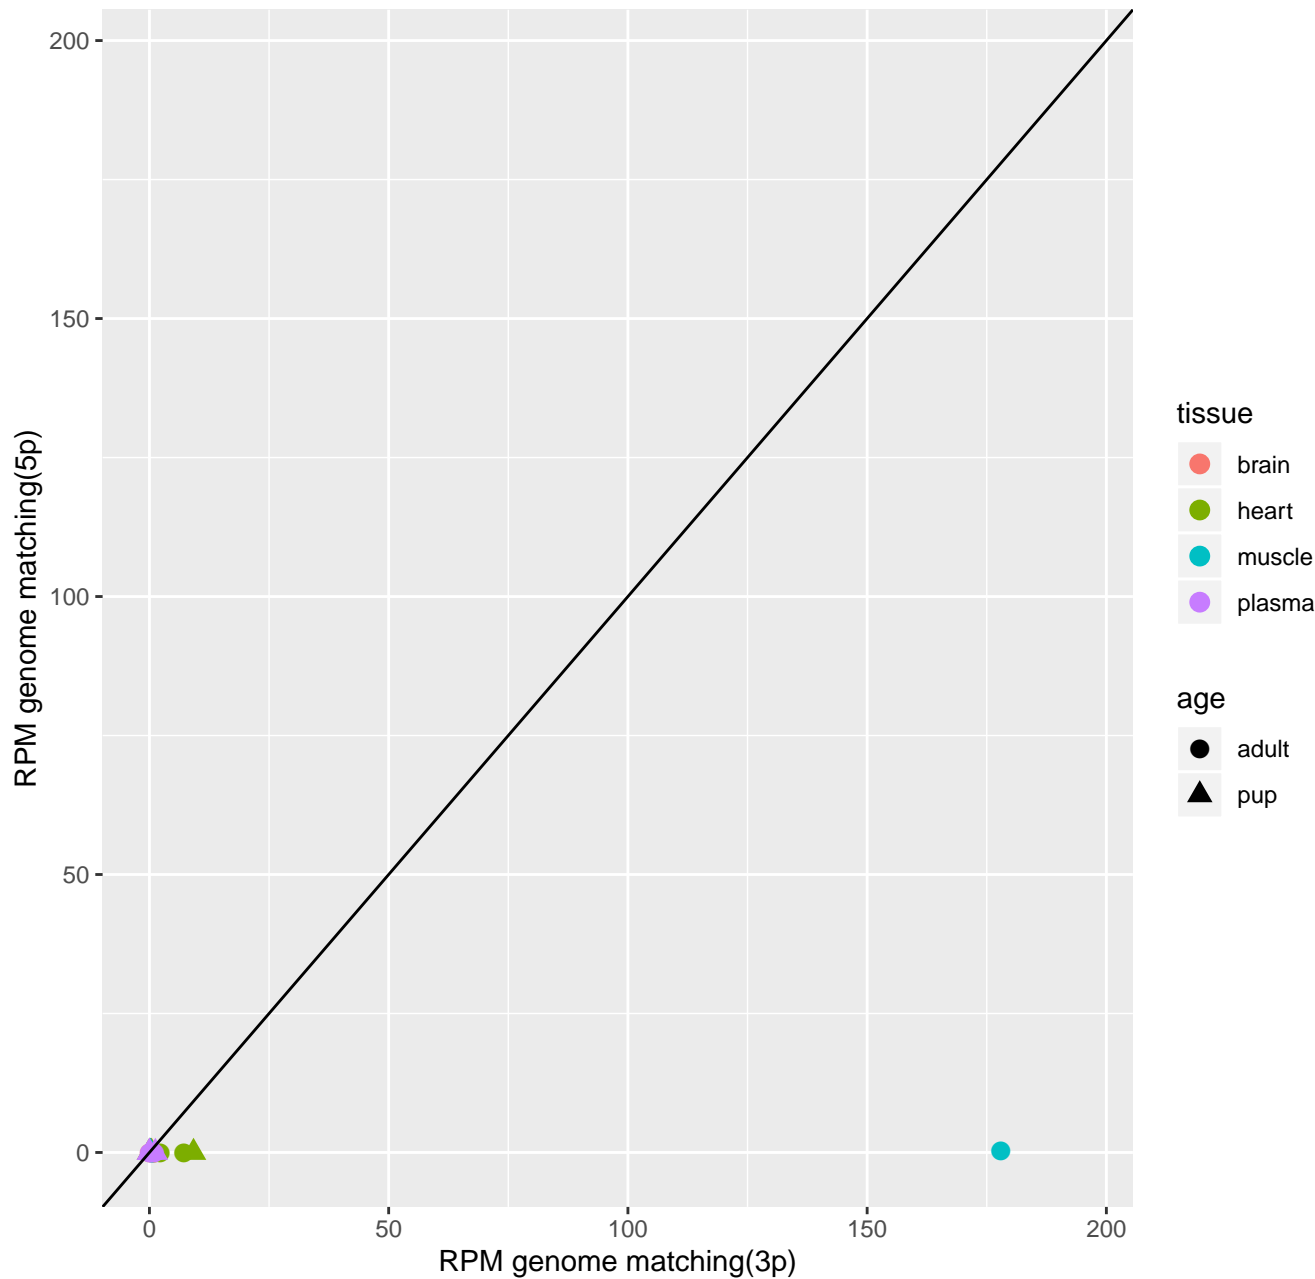

# lwe-miR-141\_loc1

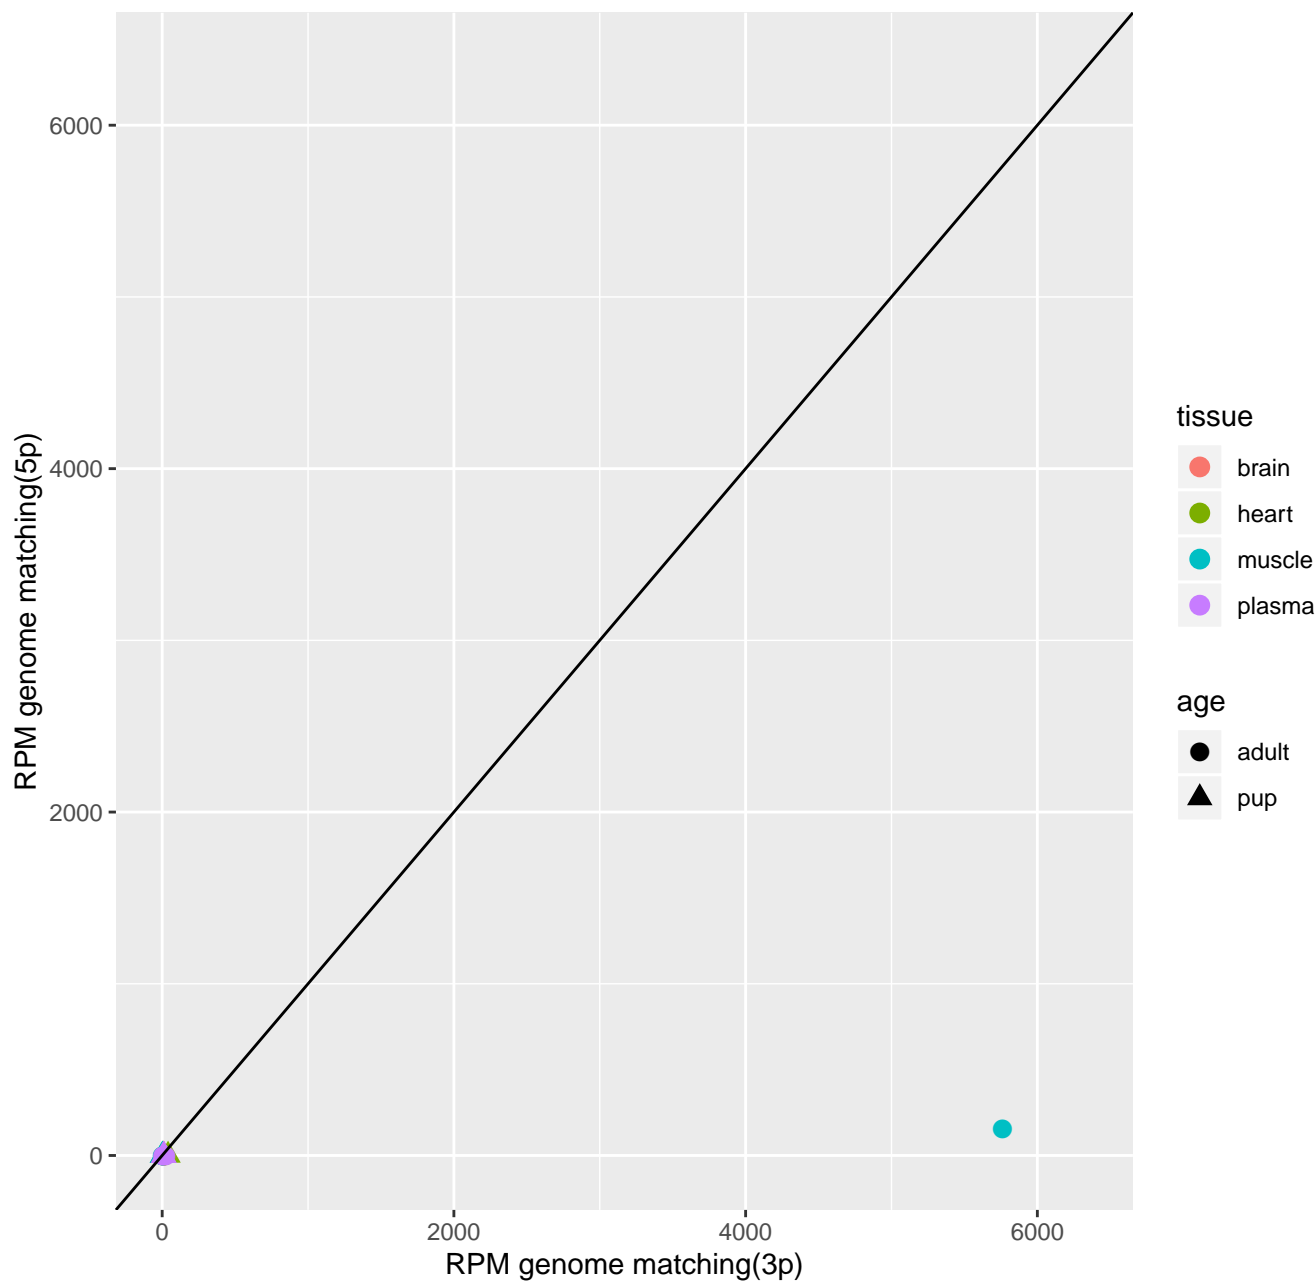



# lwe-miR-124a\_loc2

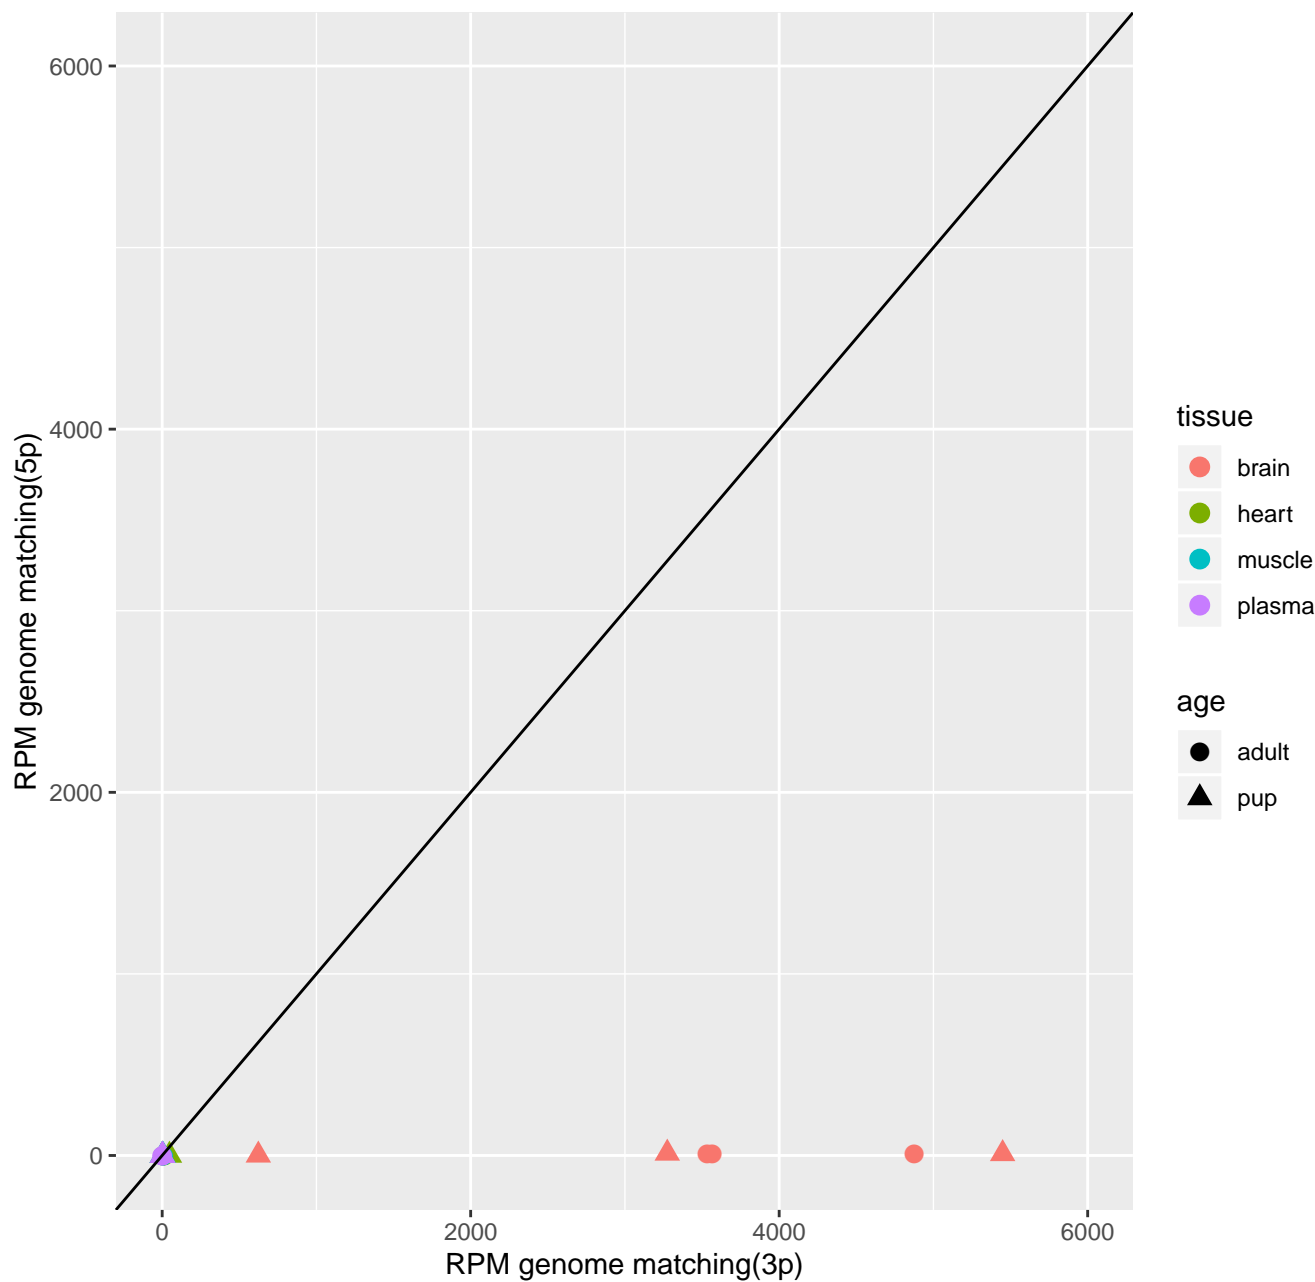

## novel\_57

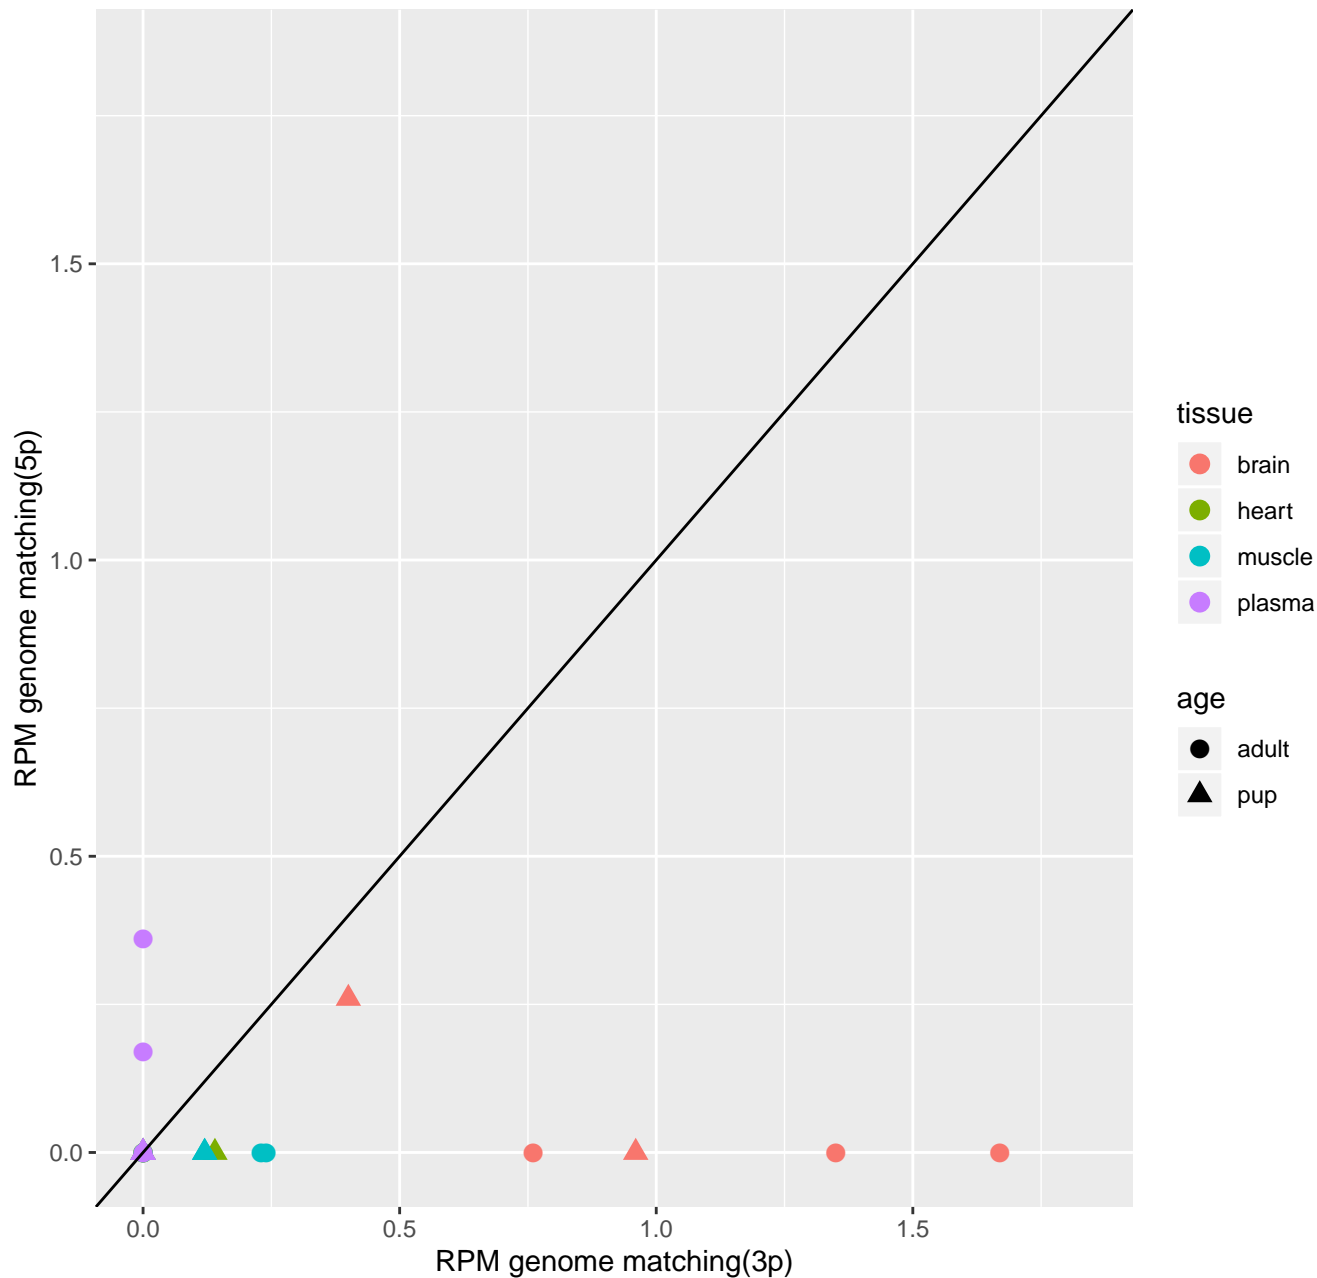

## lwe-miR-219\_loc2

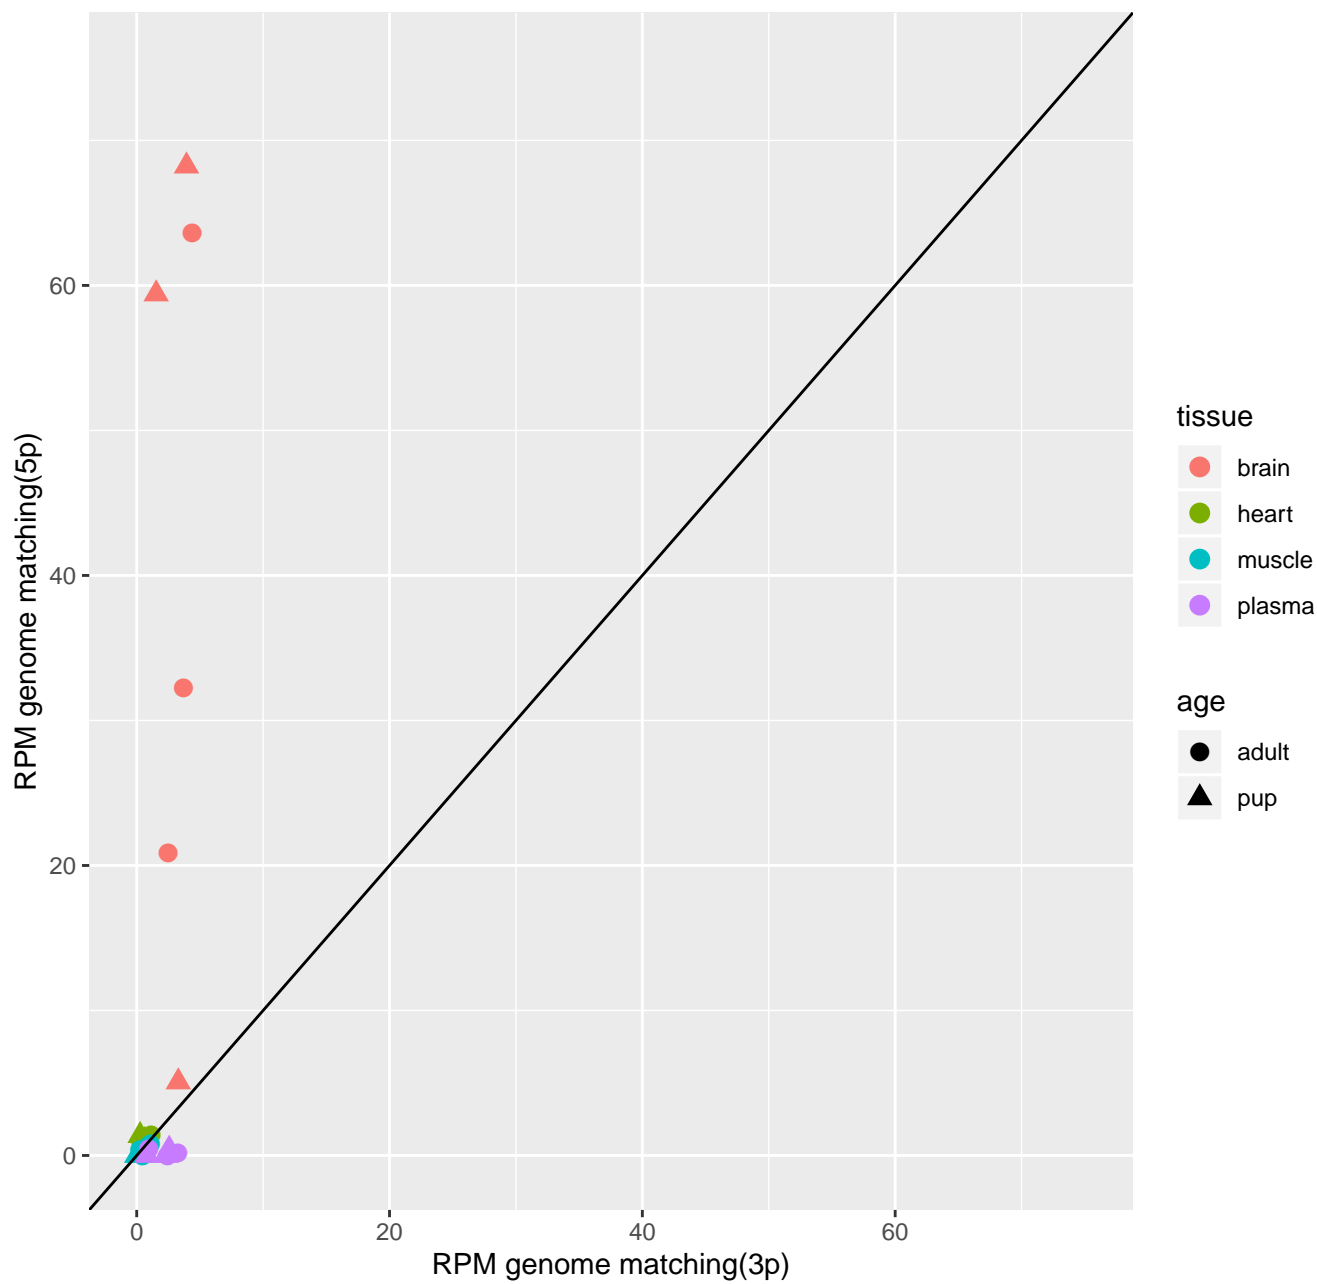

## novel\_58

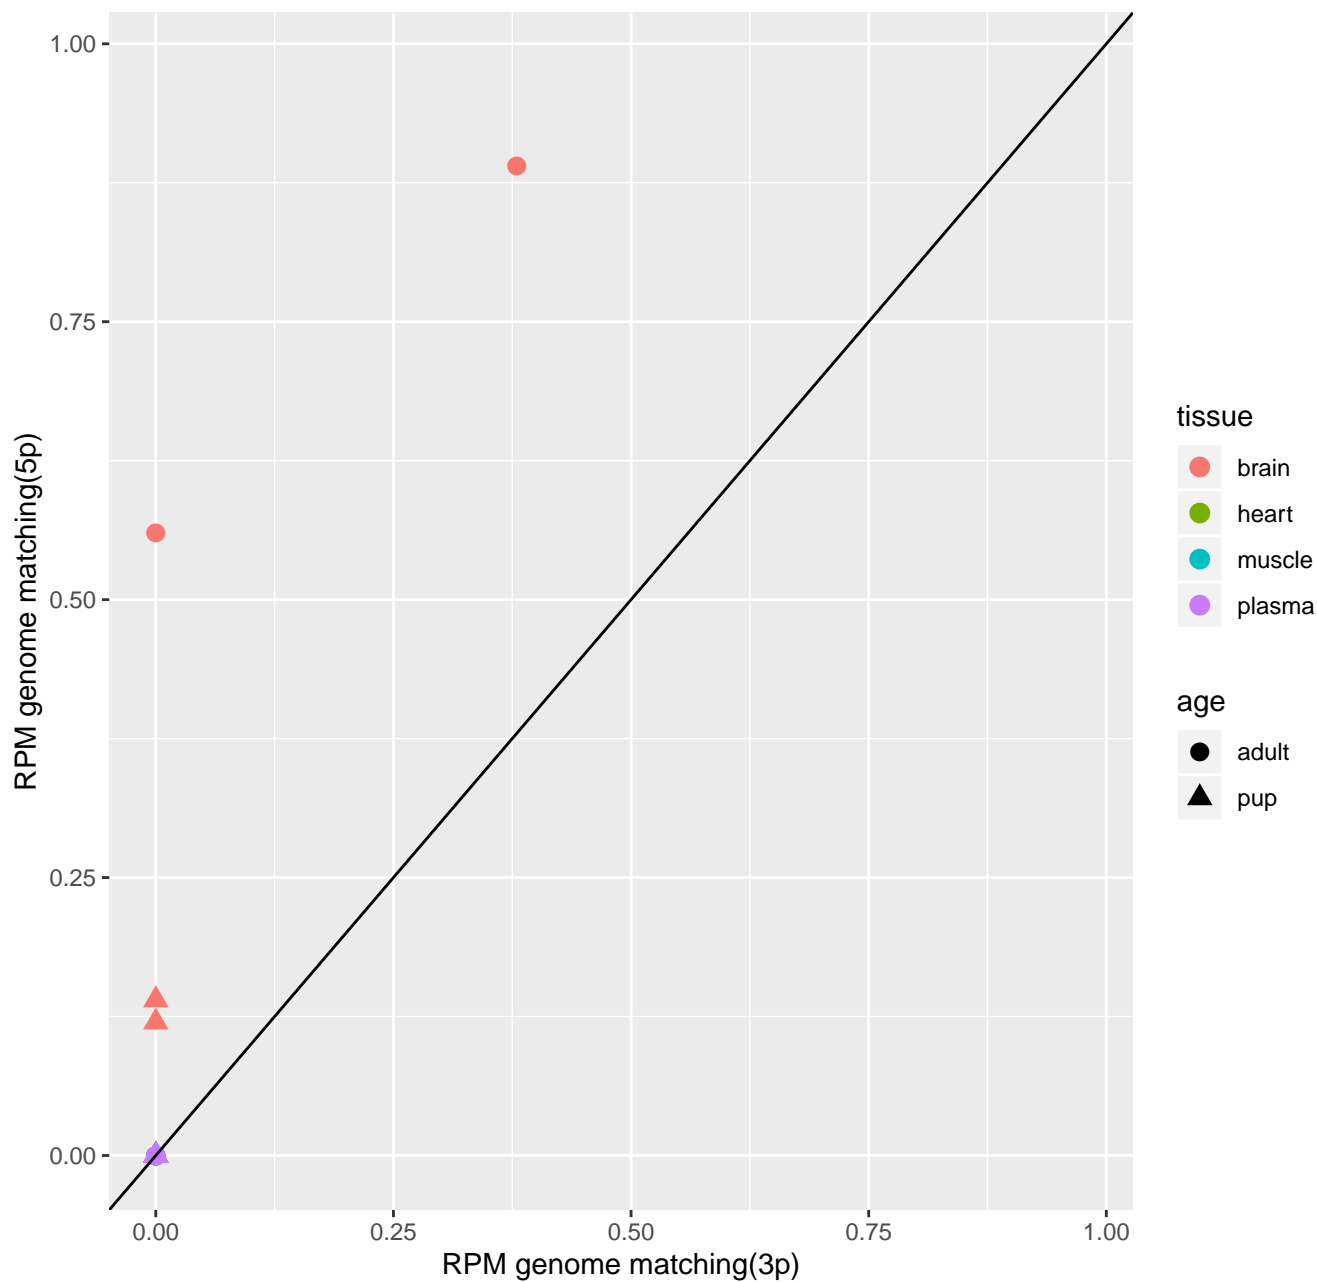

## novel\_59

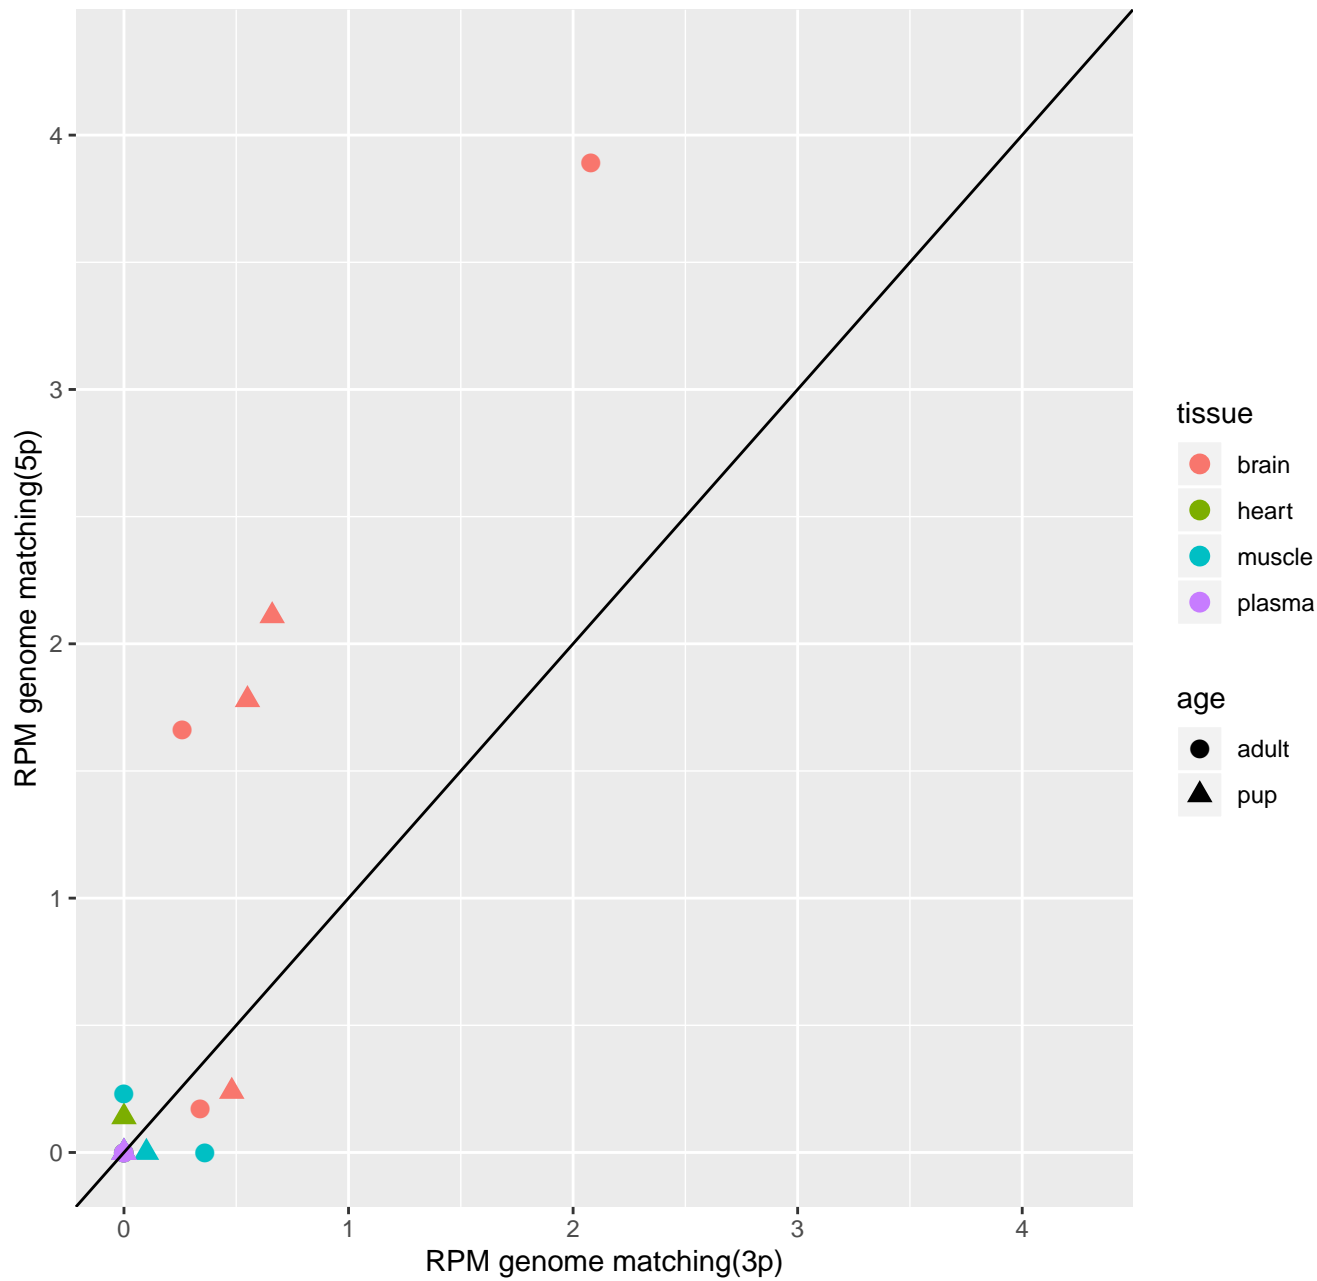

# lwe-miR-23b\_loc1

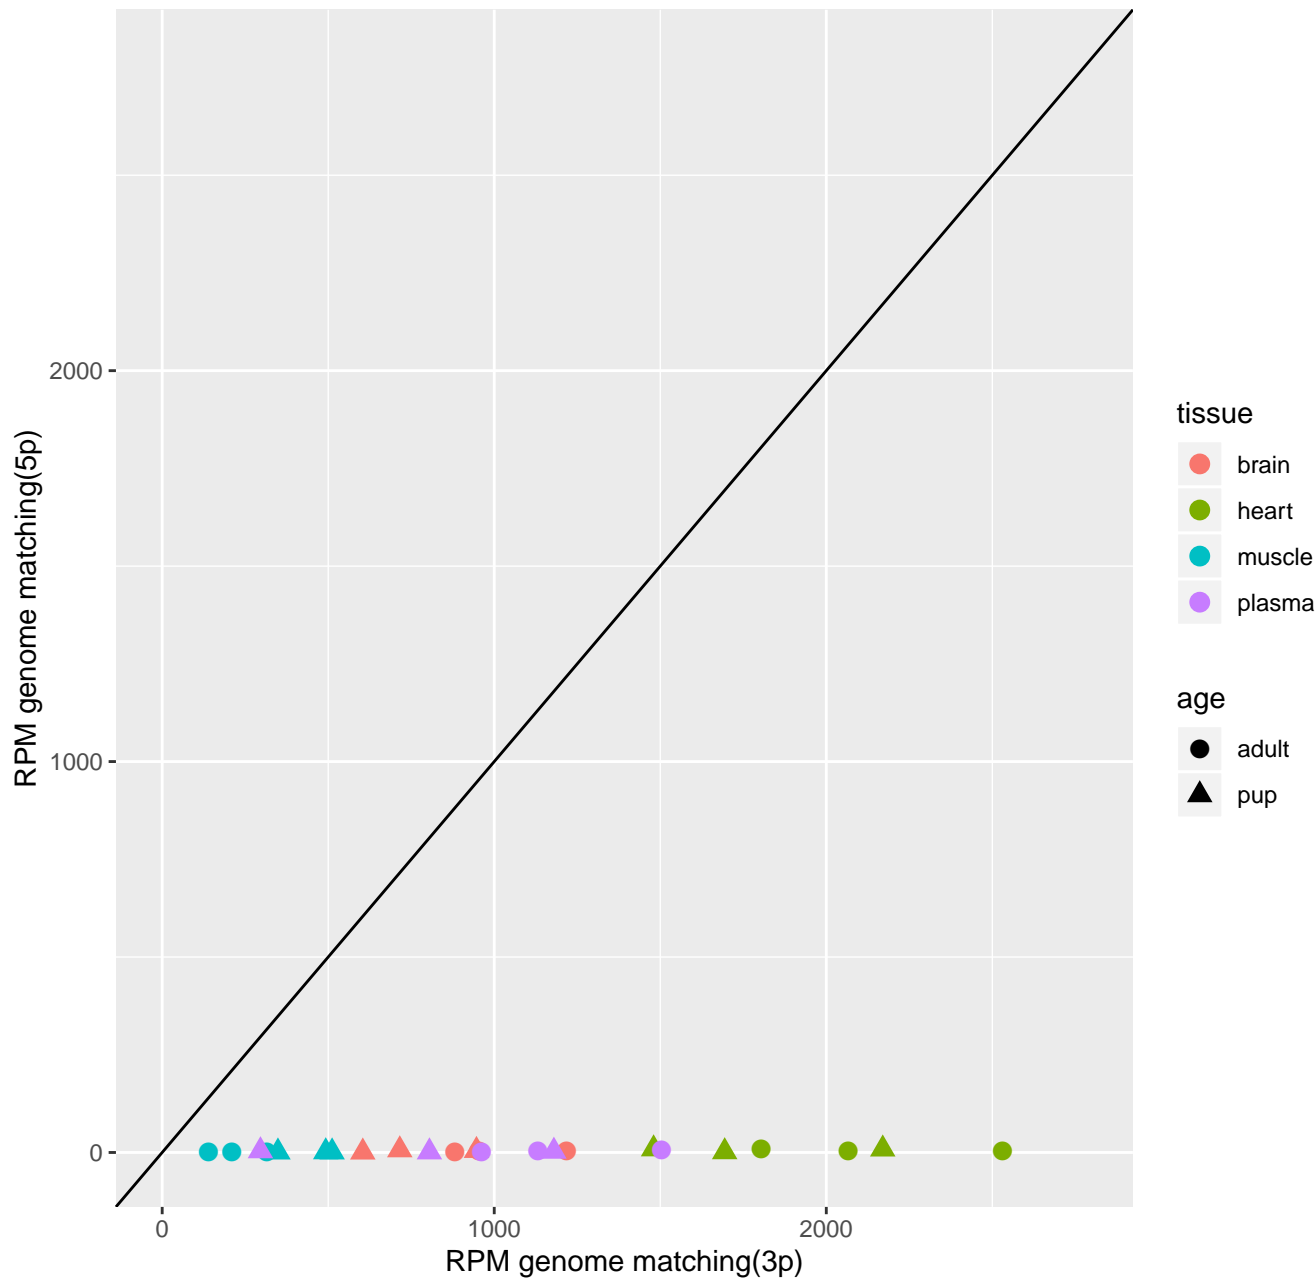

# lwe-miR-27\_loc1

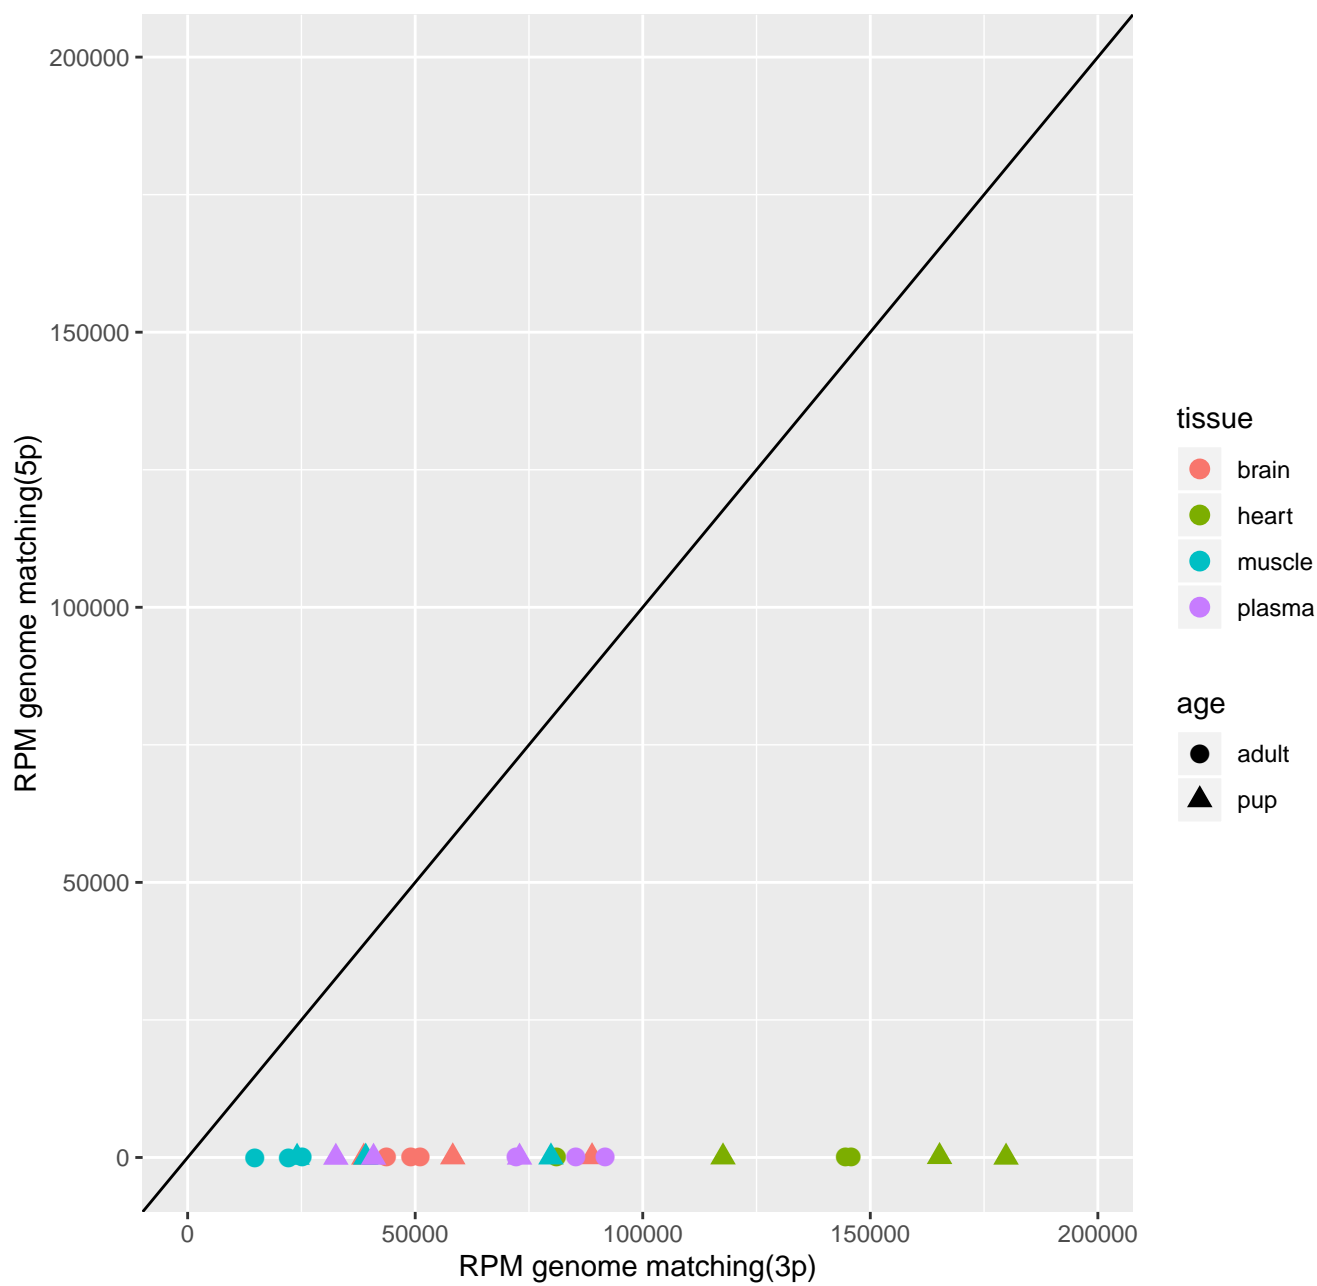

## lwe-miR-24a\_loc2

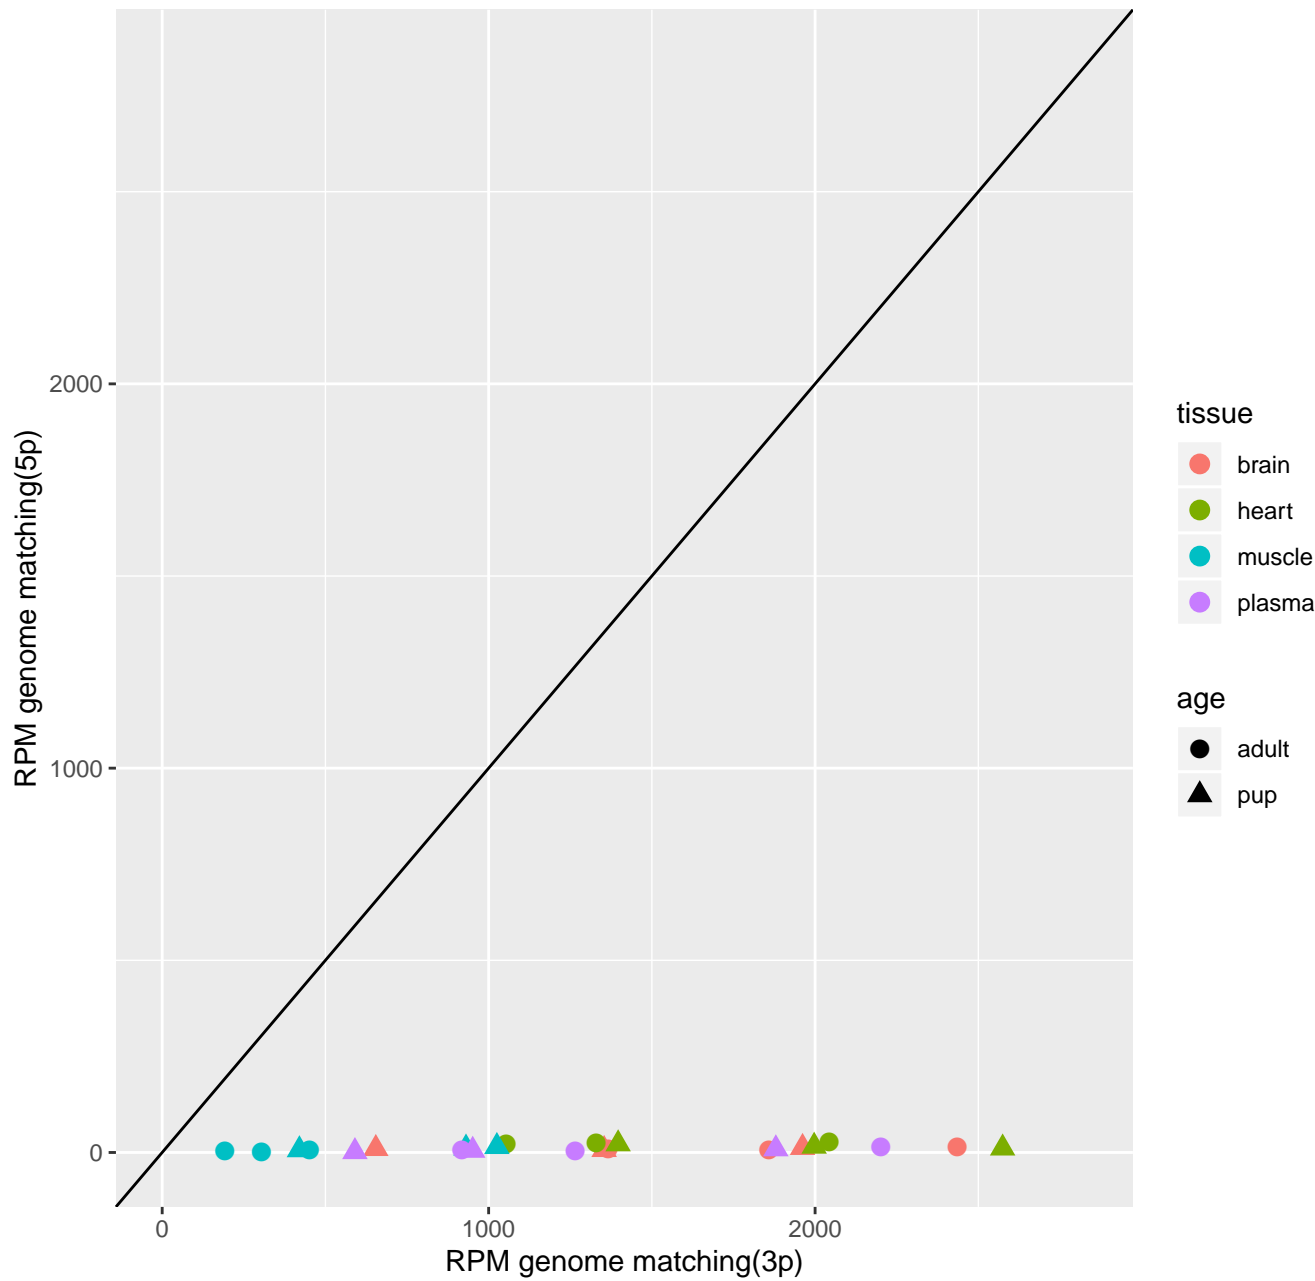



## lwe-miR-330\_loc1

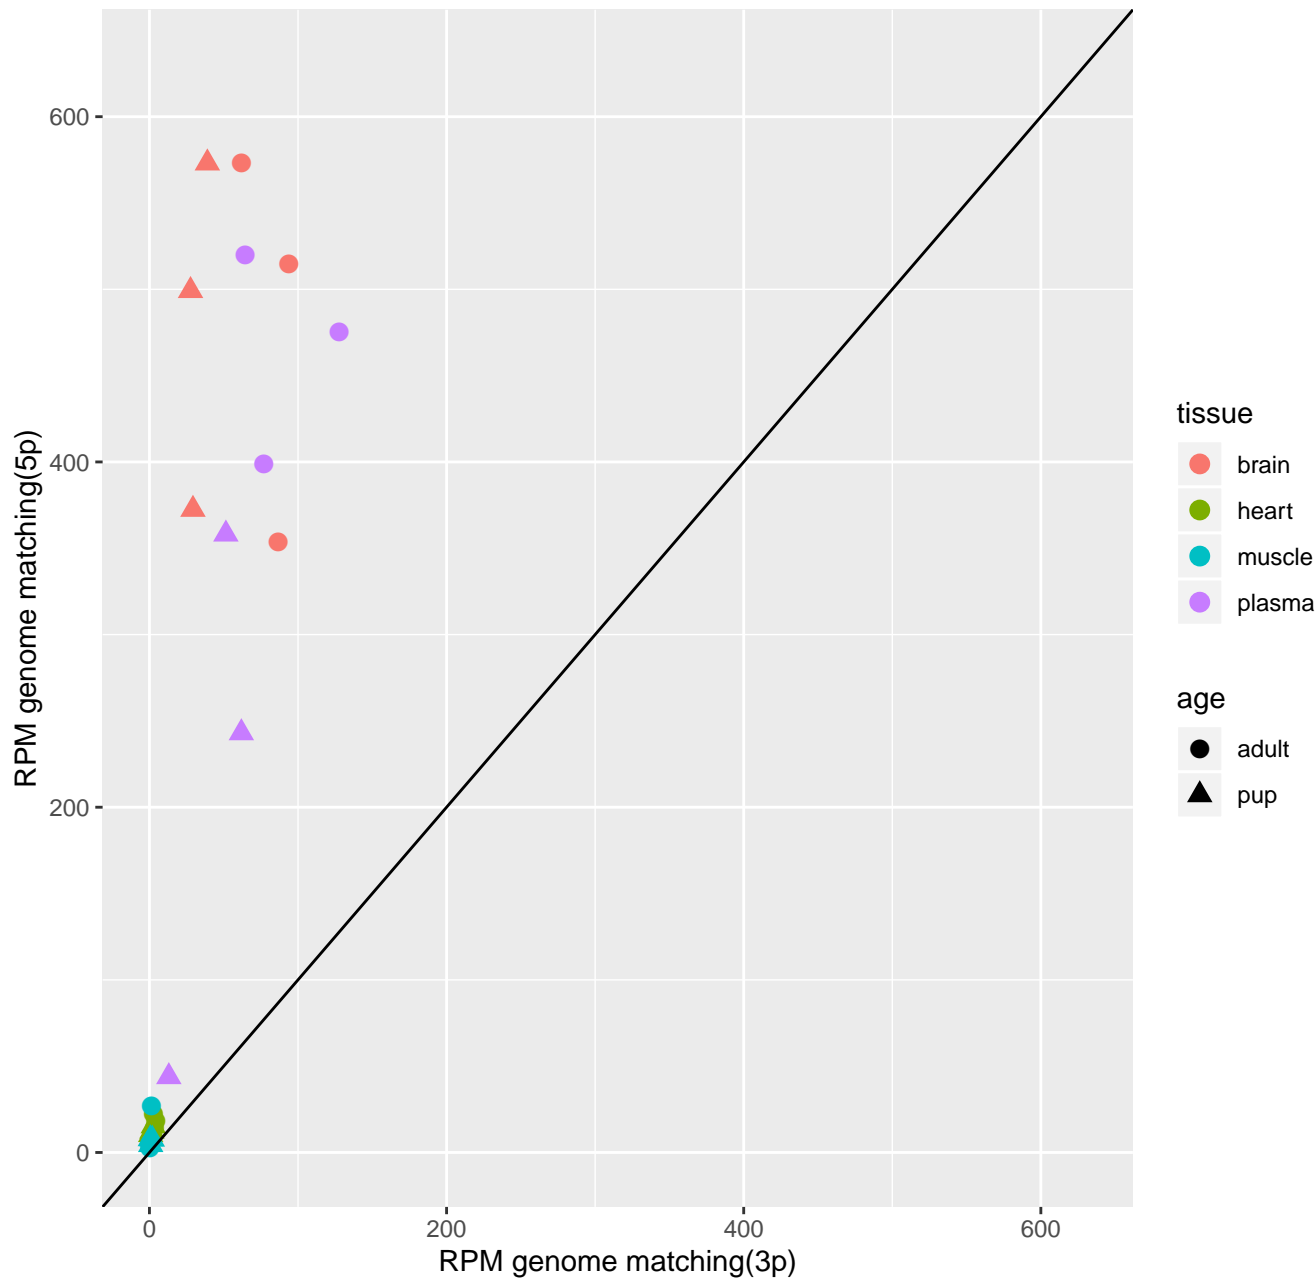

novel\_60

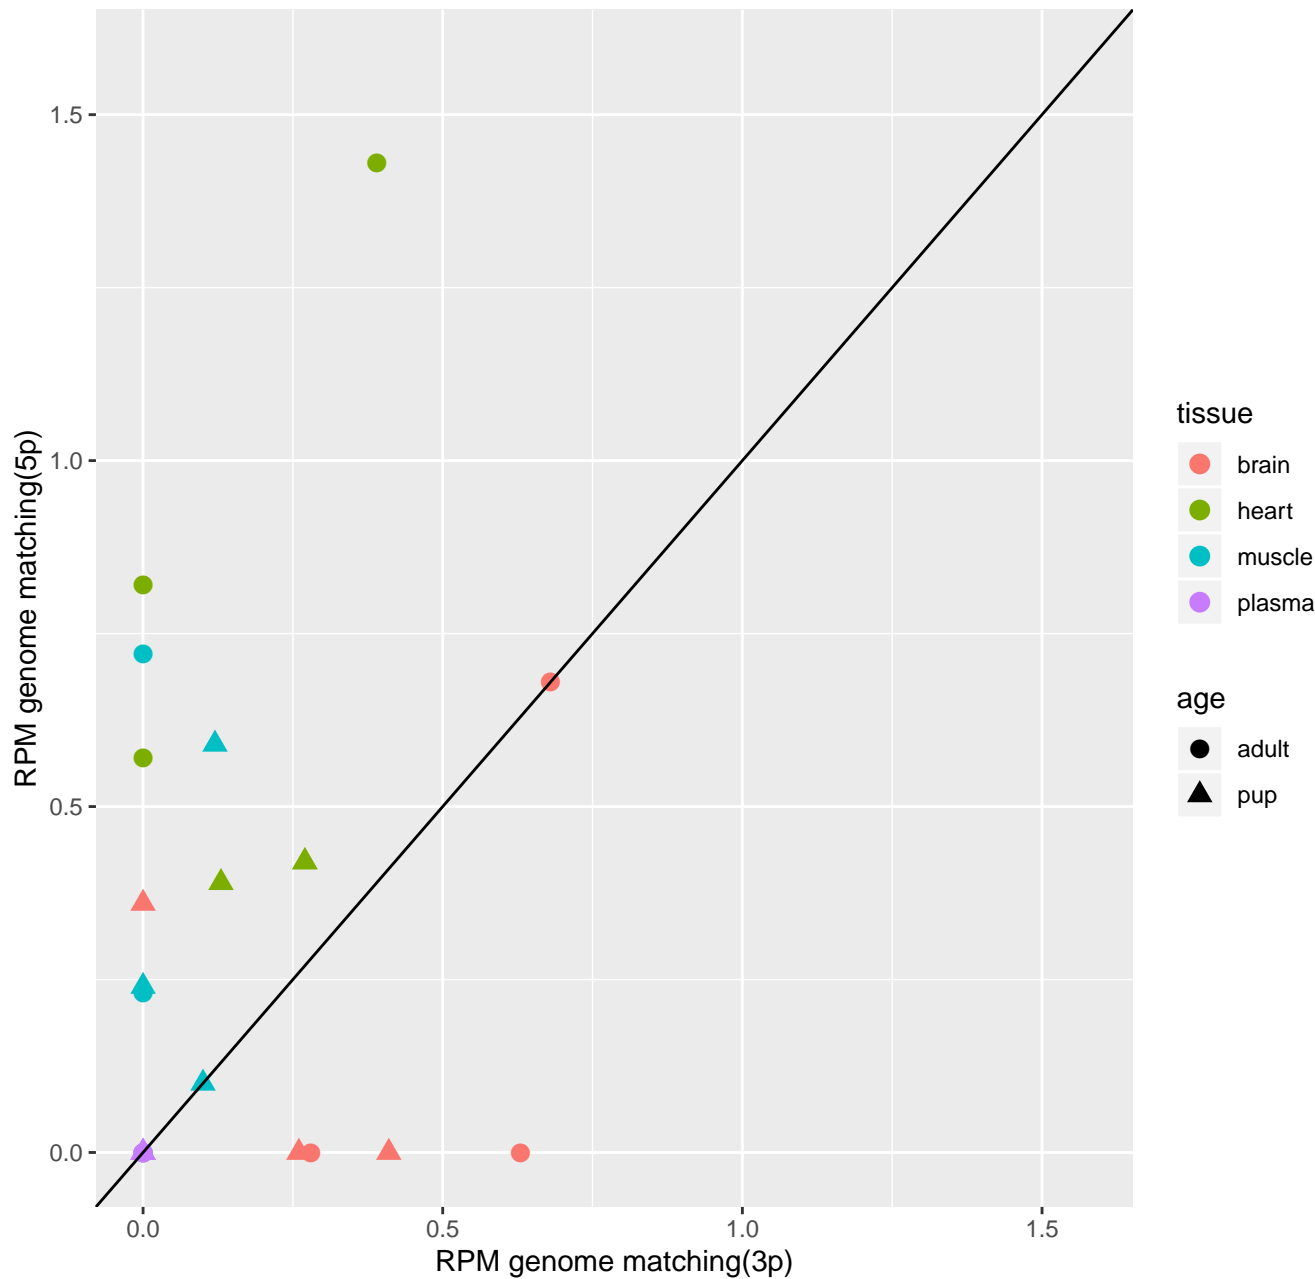

## lwe-miR-100a\_loc1

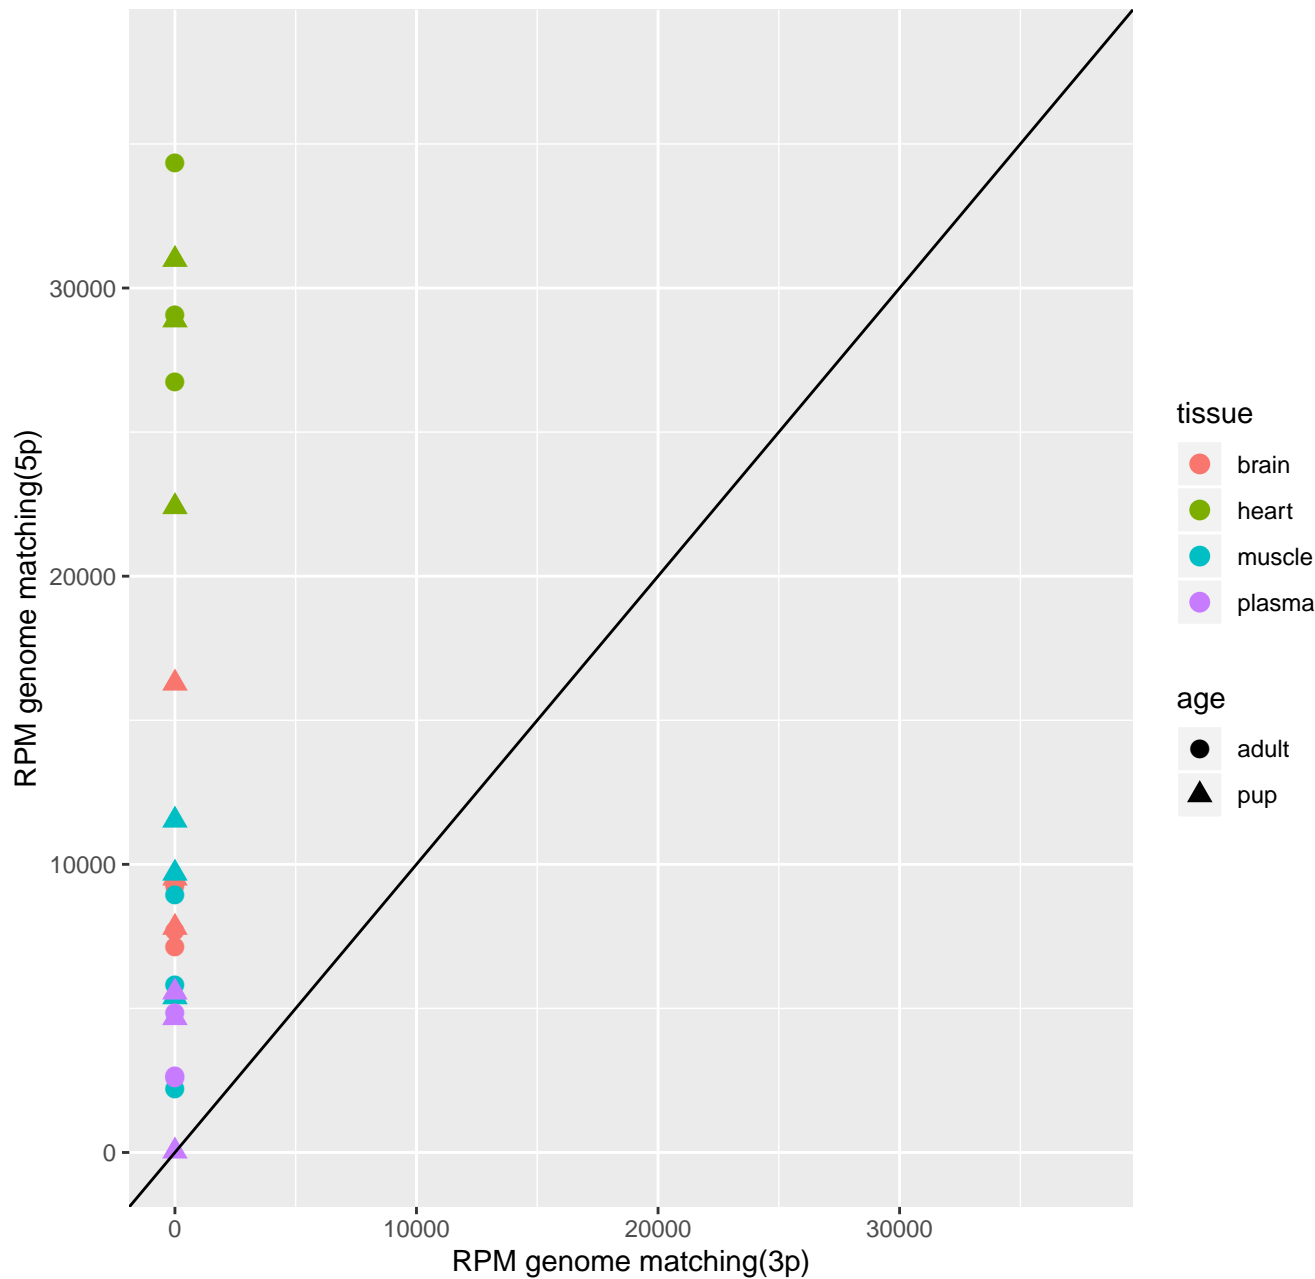

## let-7a\_loc3

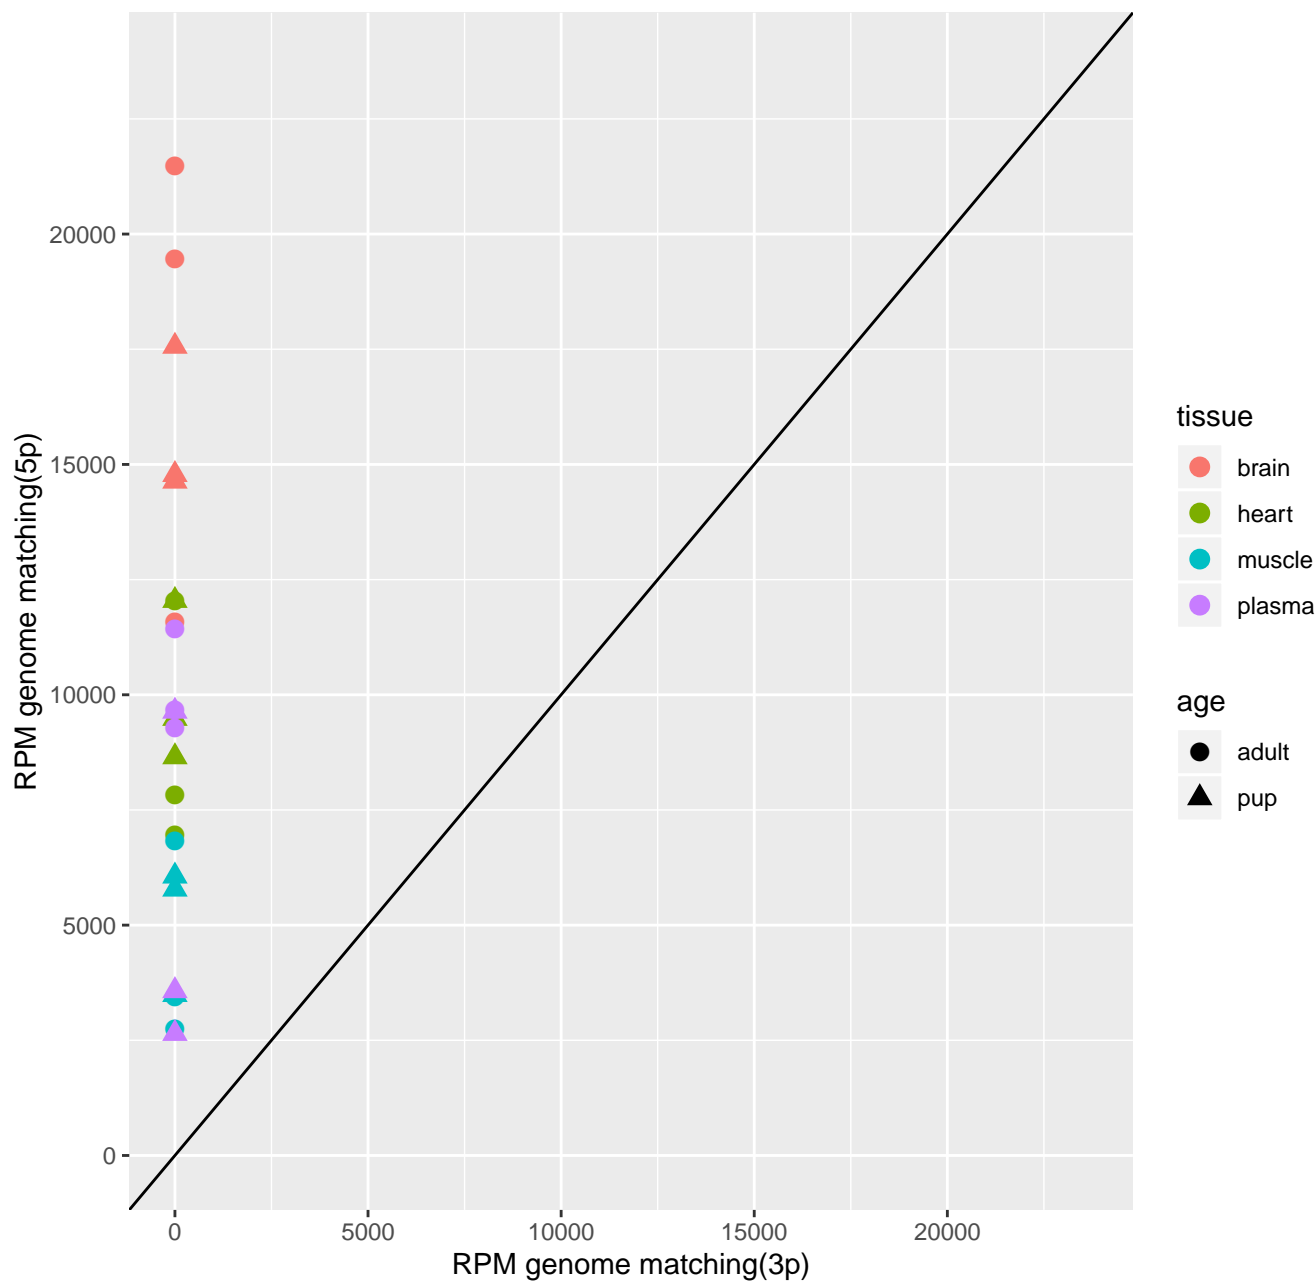

## lwe-miR-125a\_loc1

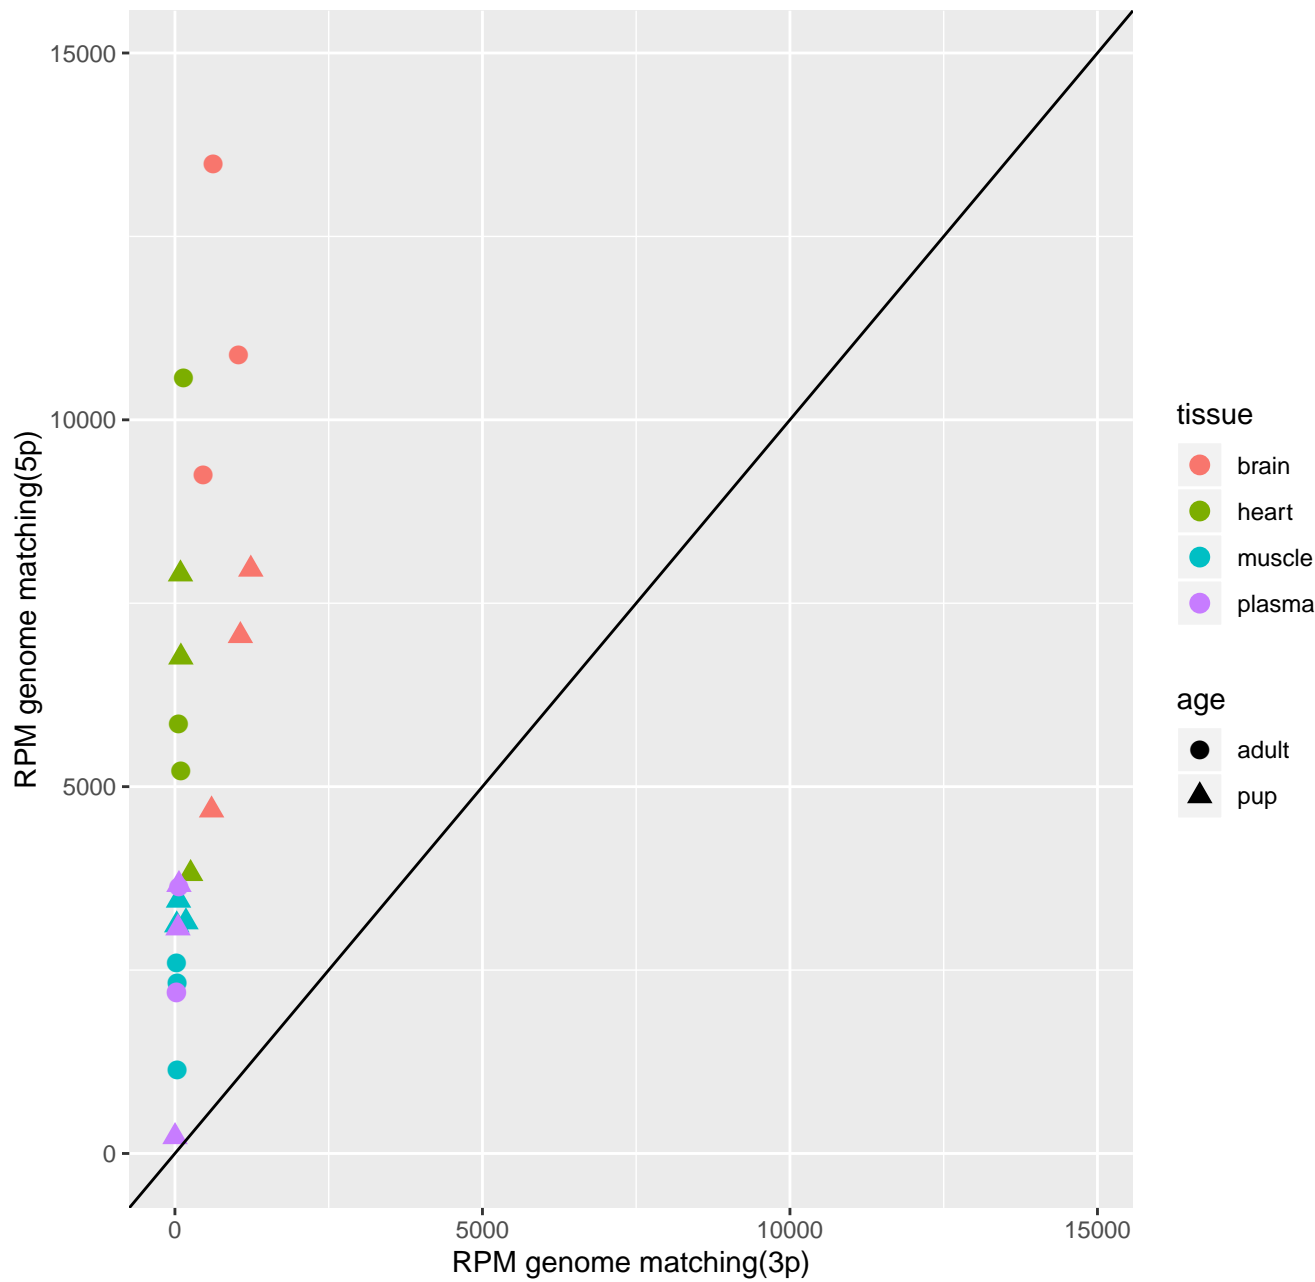

## novel\_61

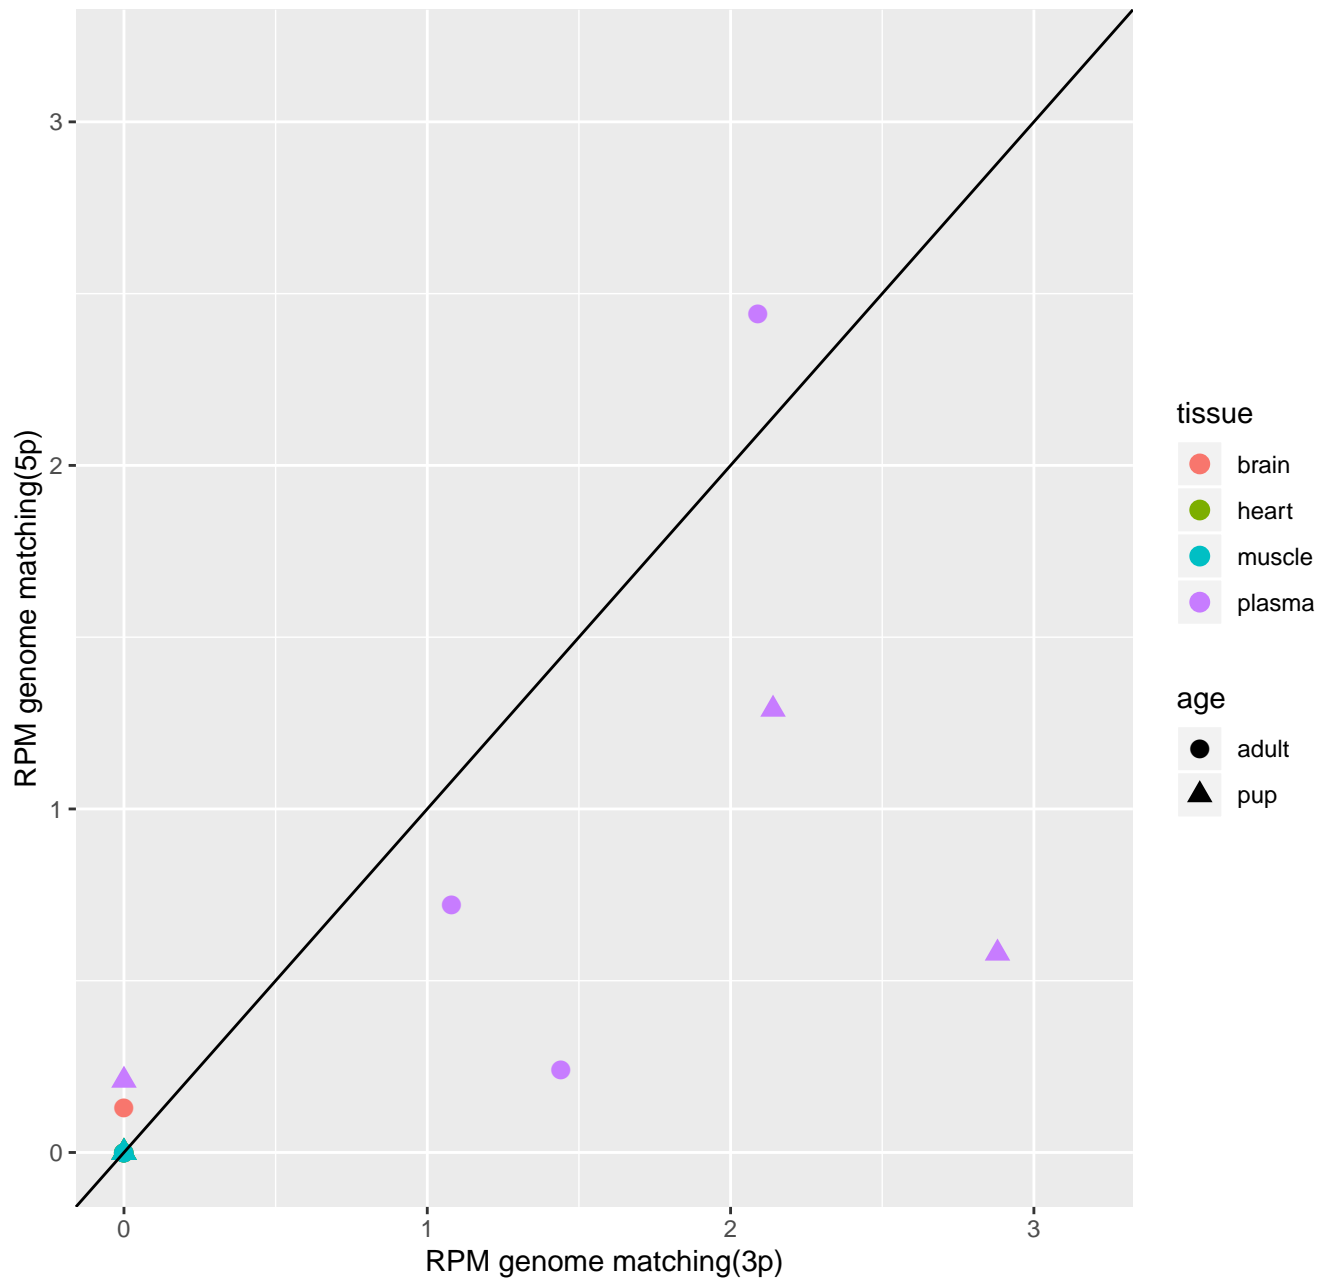

## novel\_62

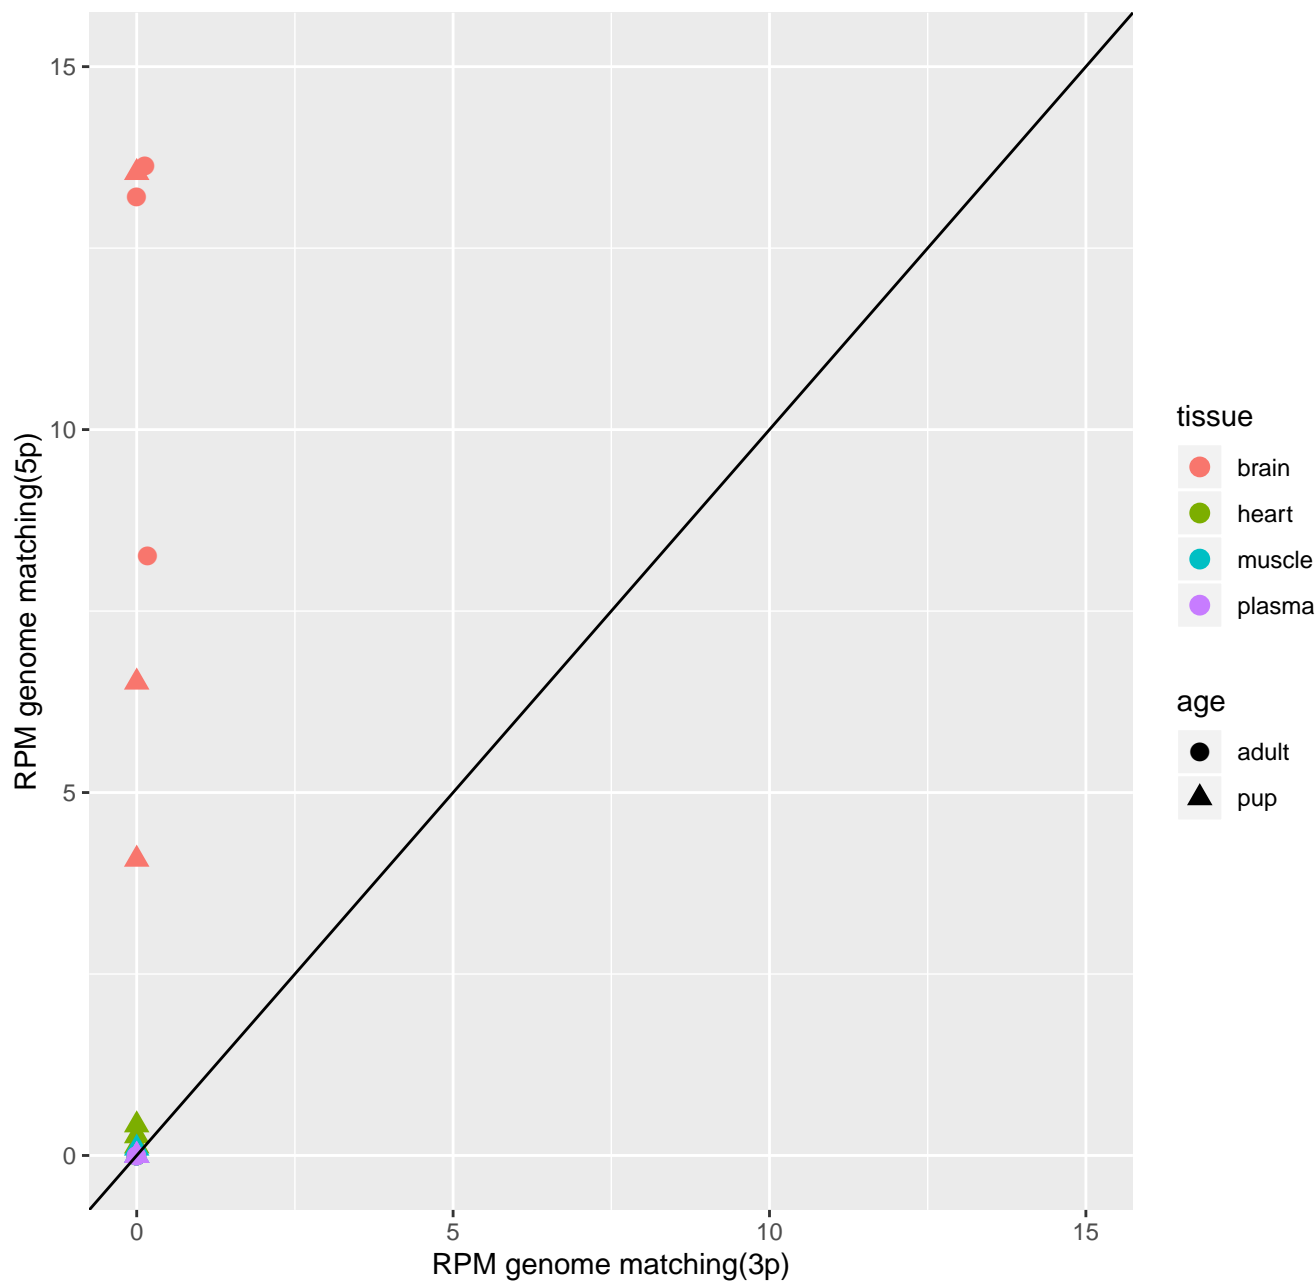

## lwe-miR-324\_loc1

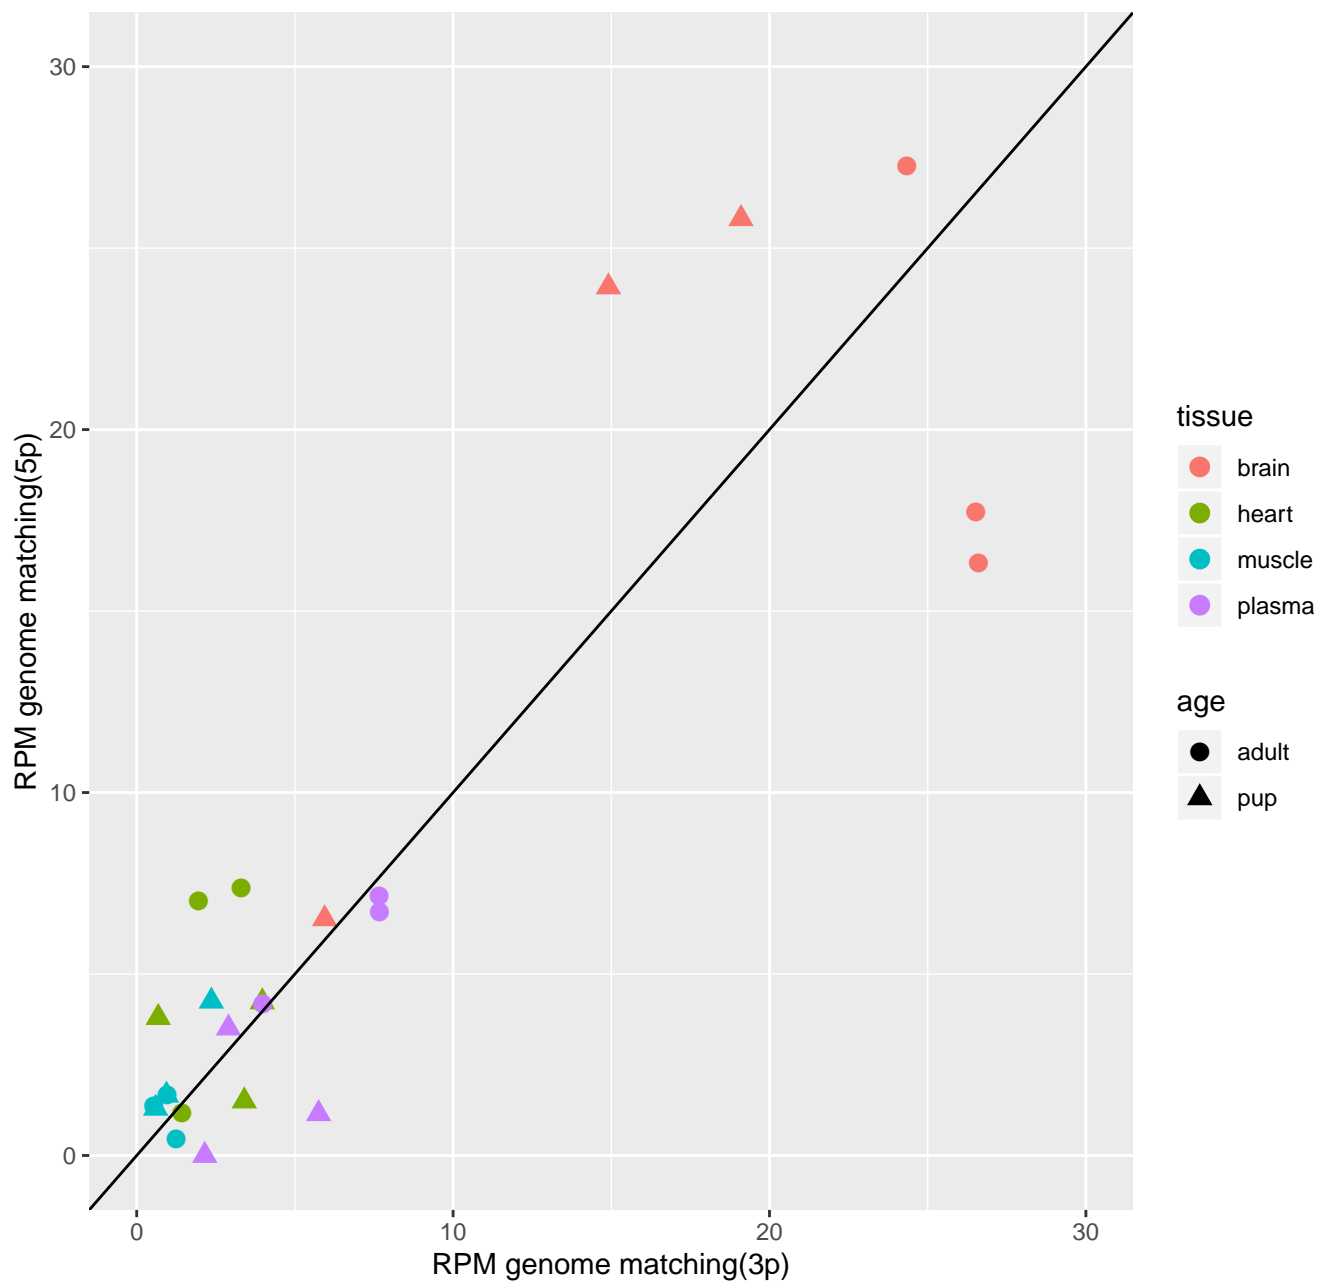



novel\_63

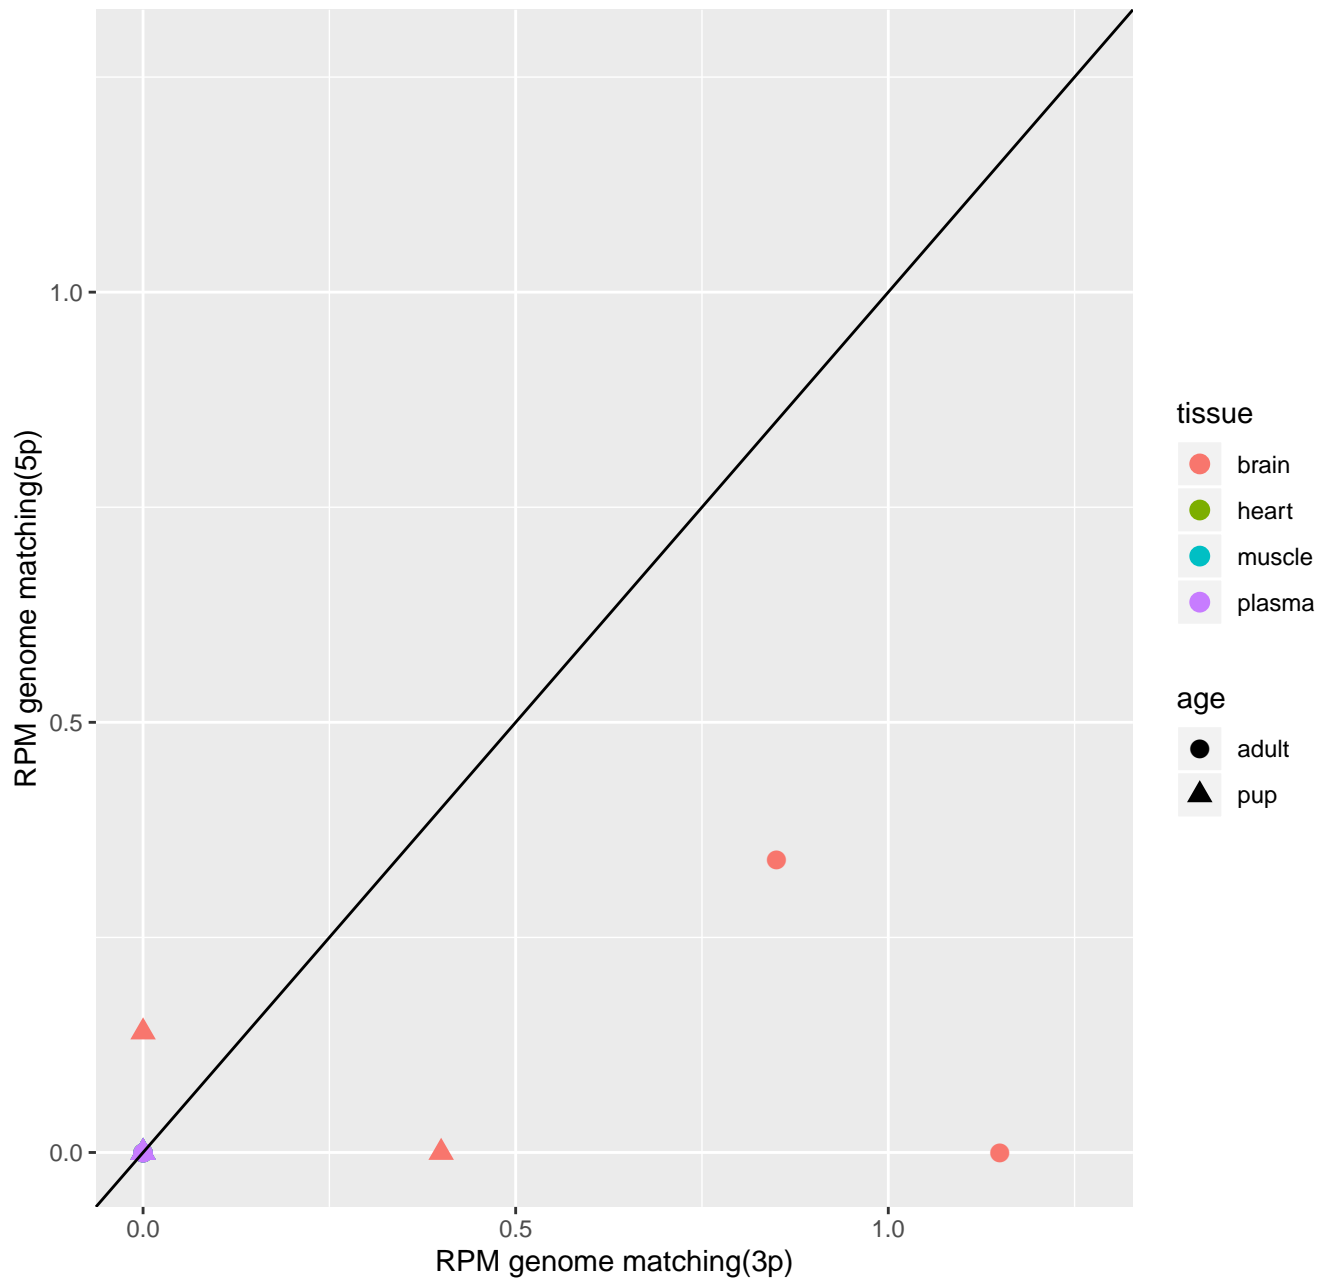



## lwe-miR-193a\_loc1

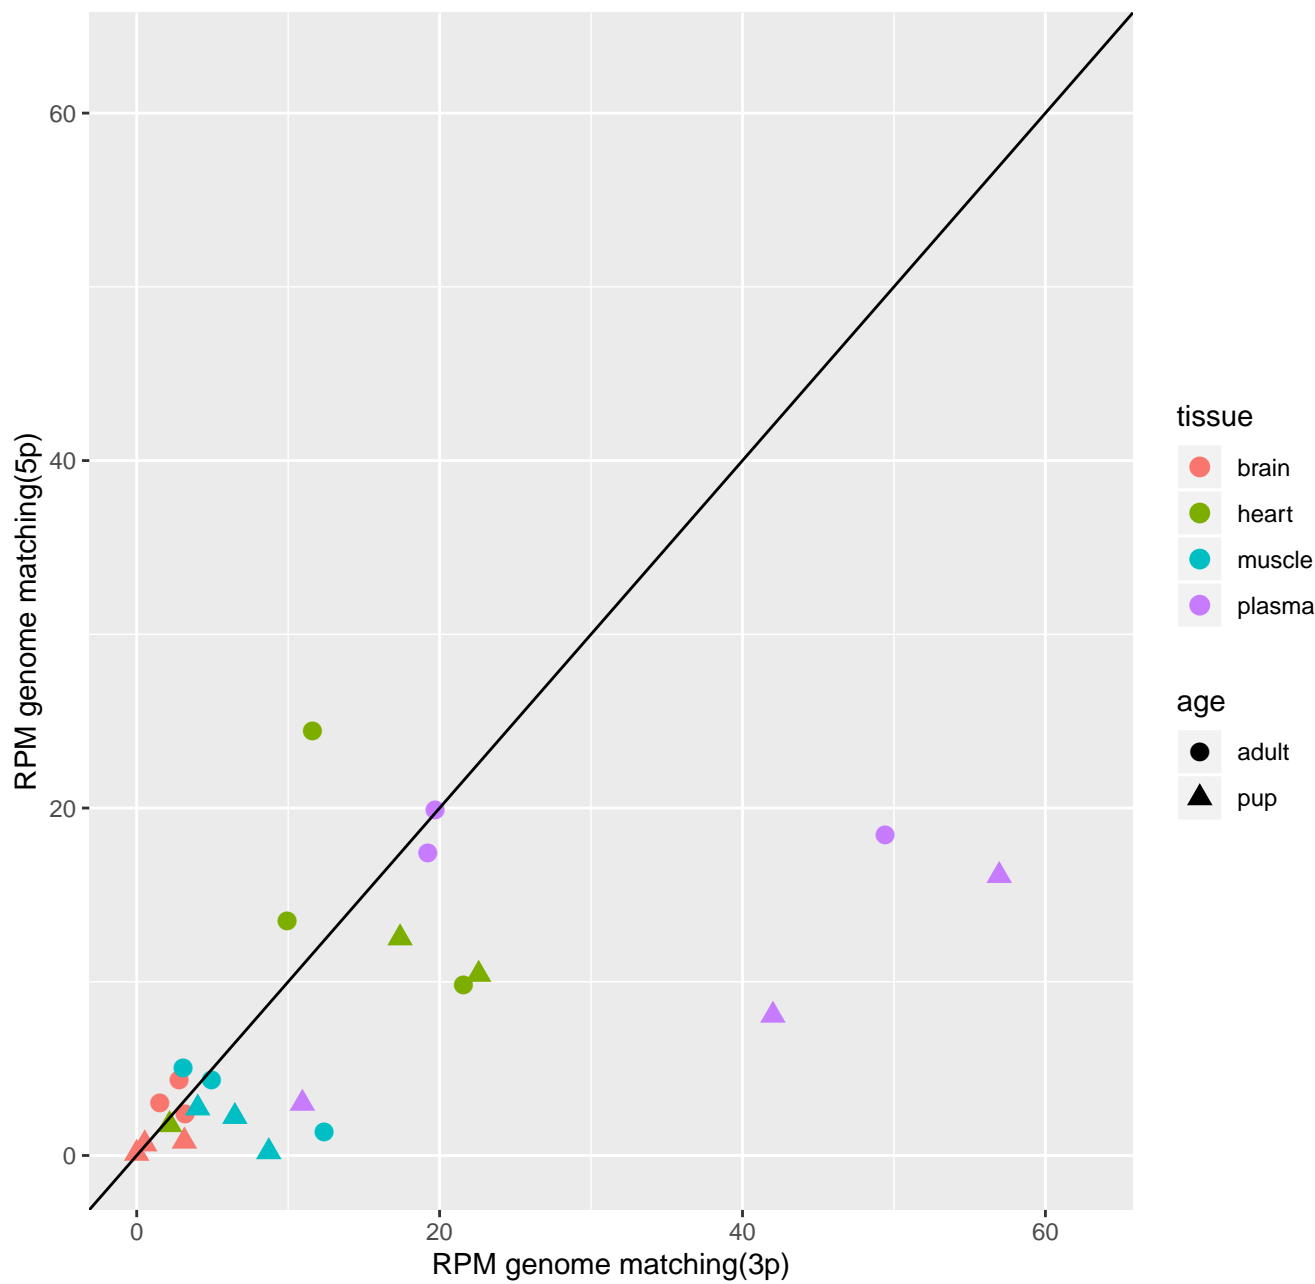

novel\_64

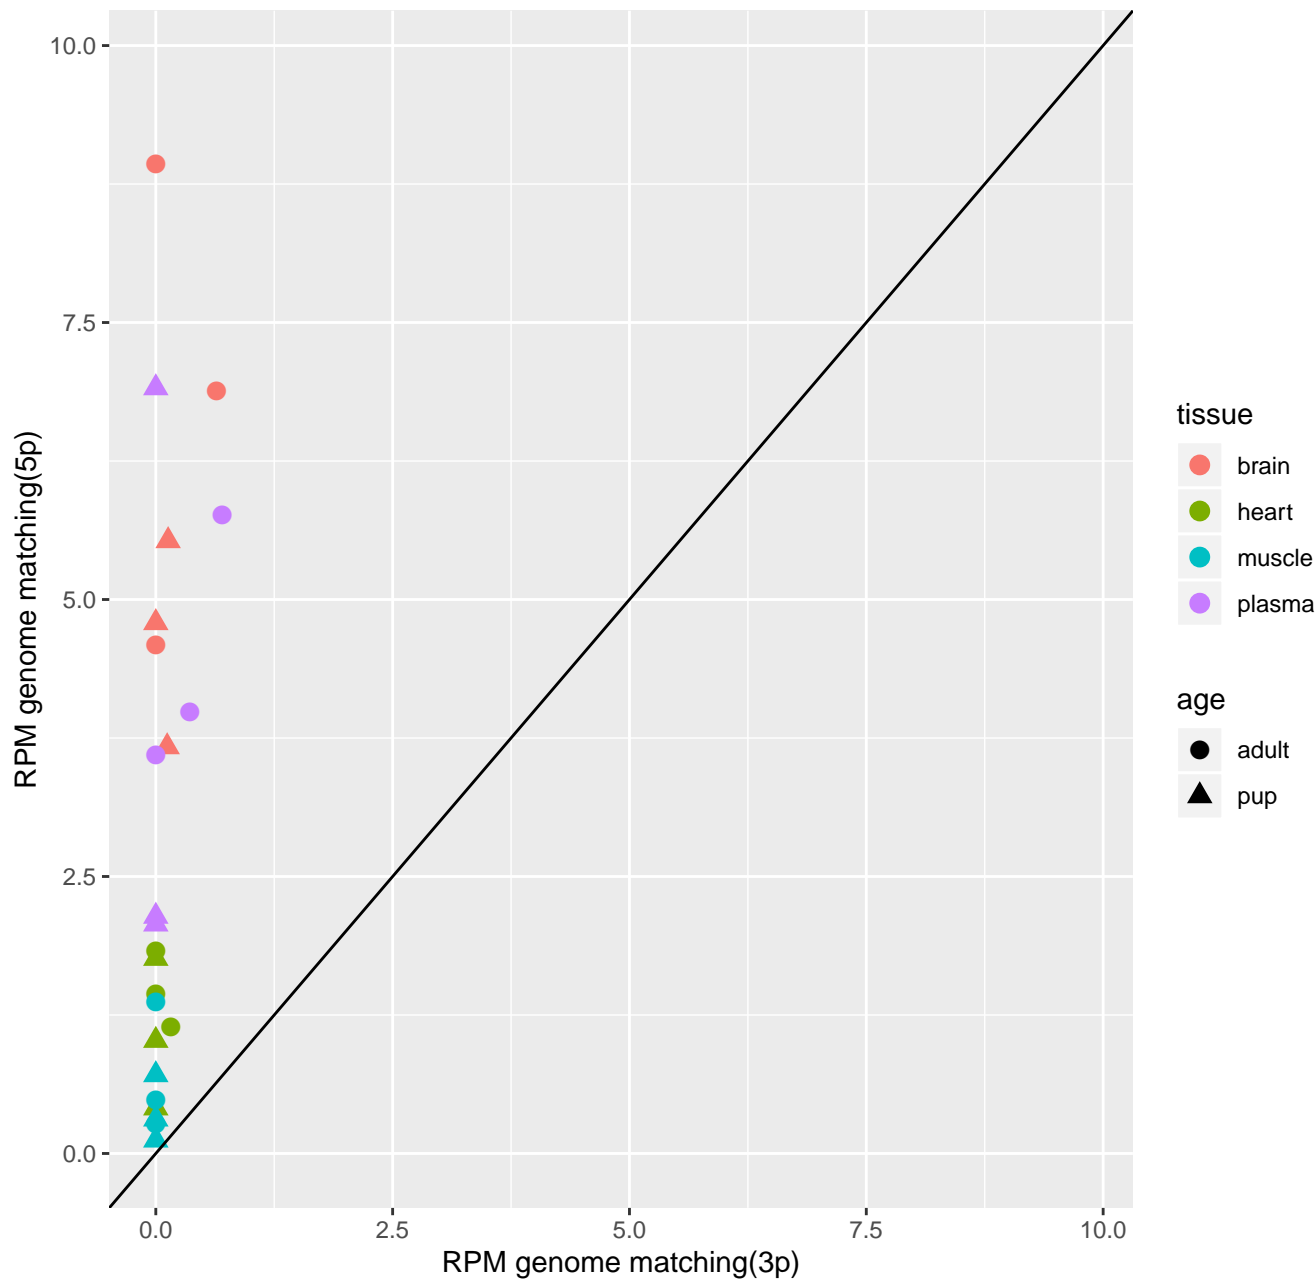

## novel\_65

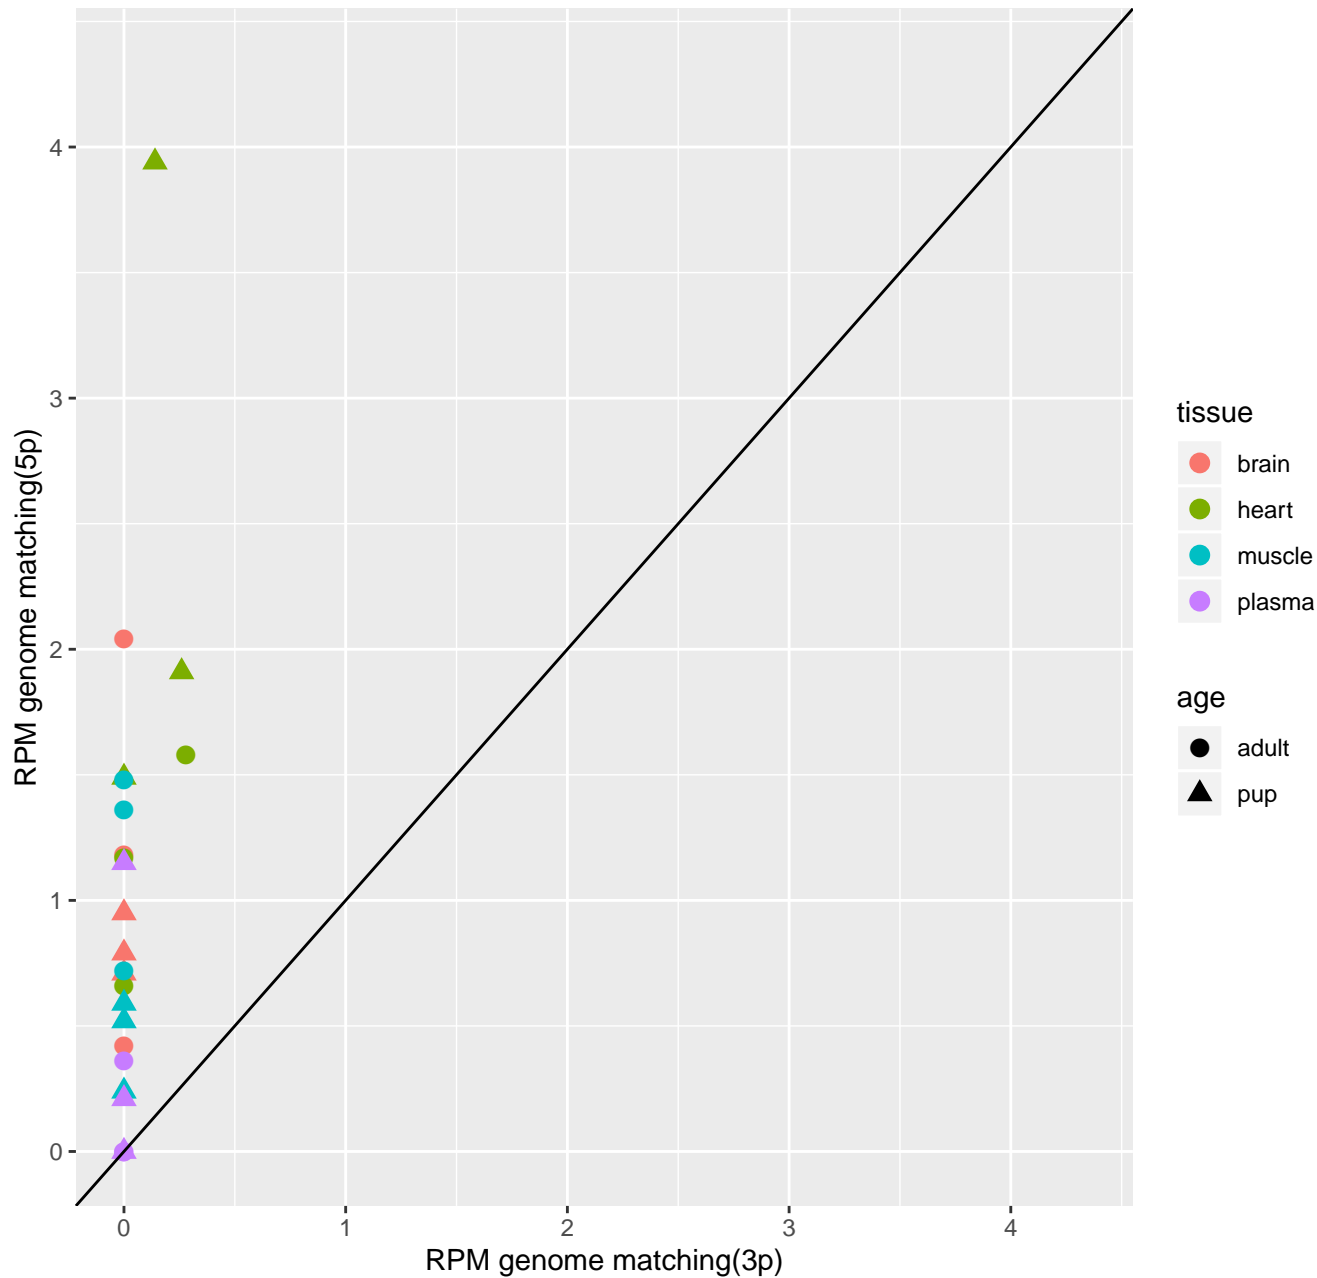

## novel\_66

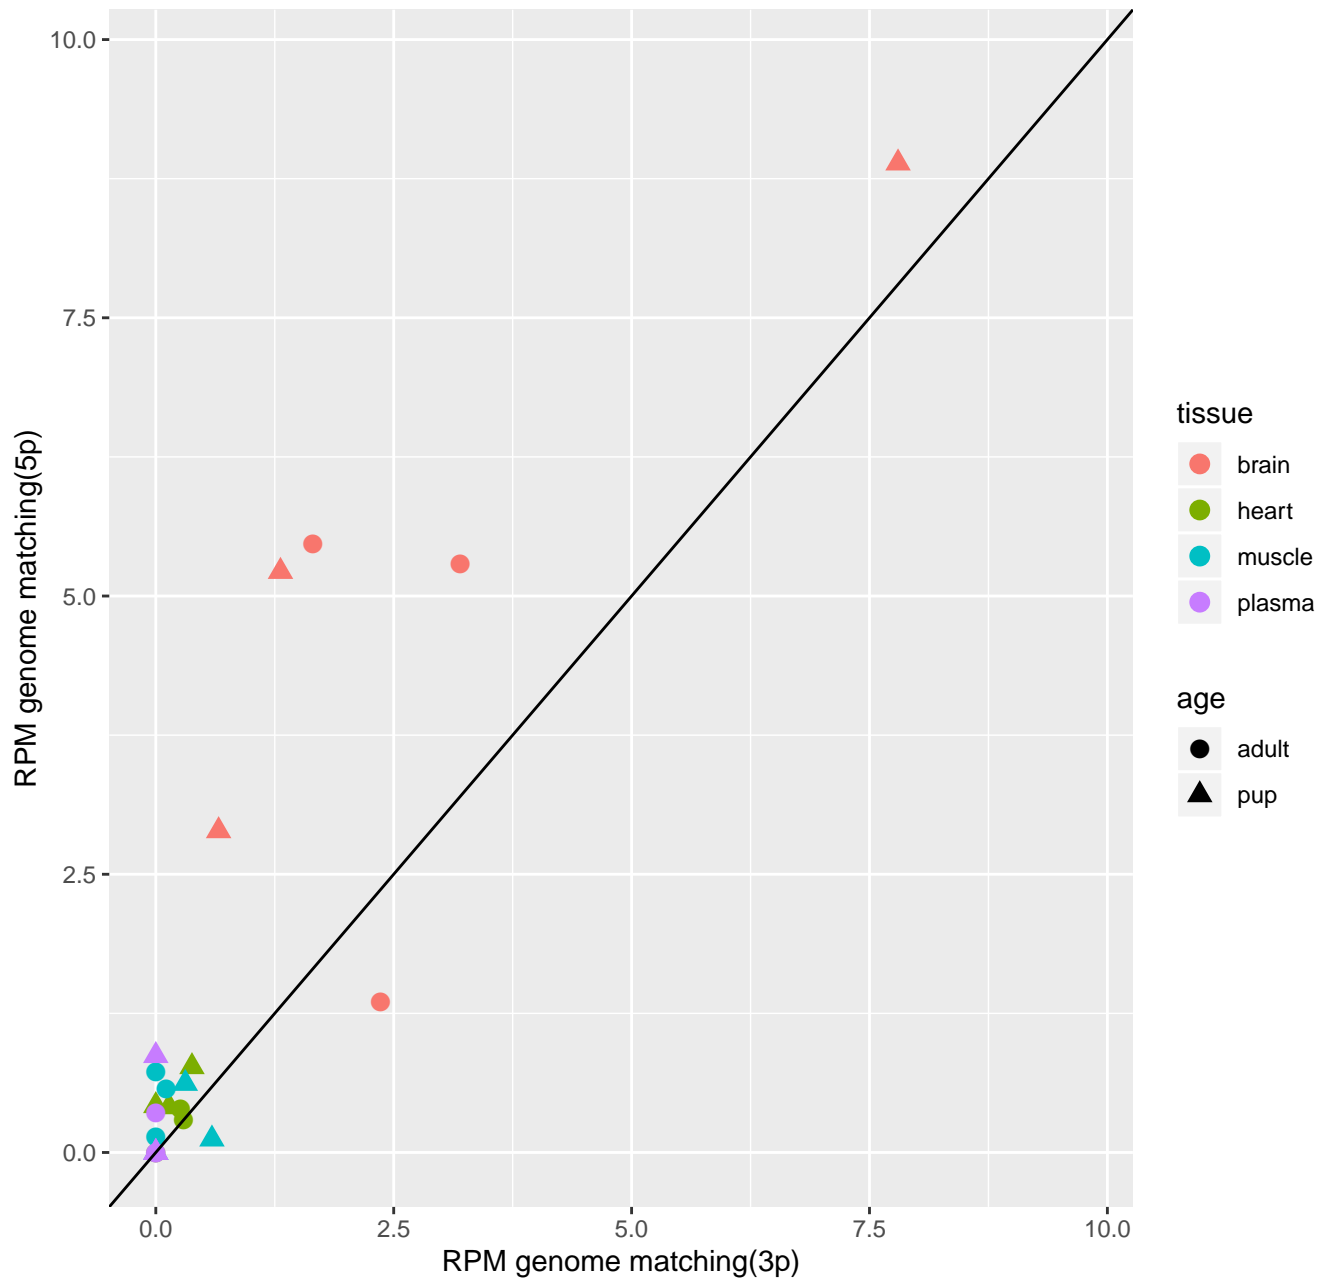

## lwe-miR-34b\_loc1

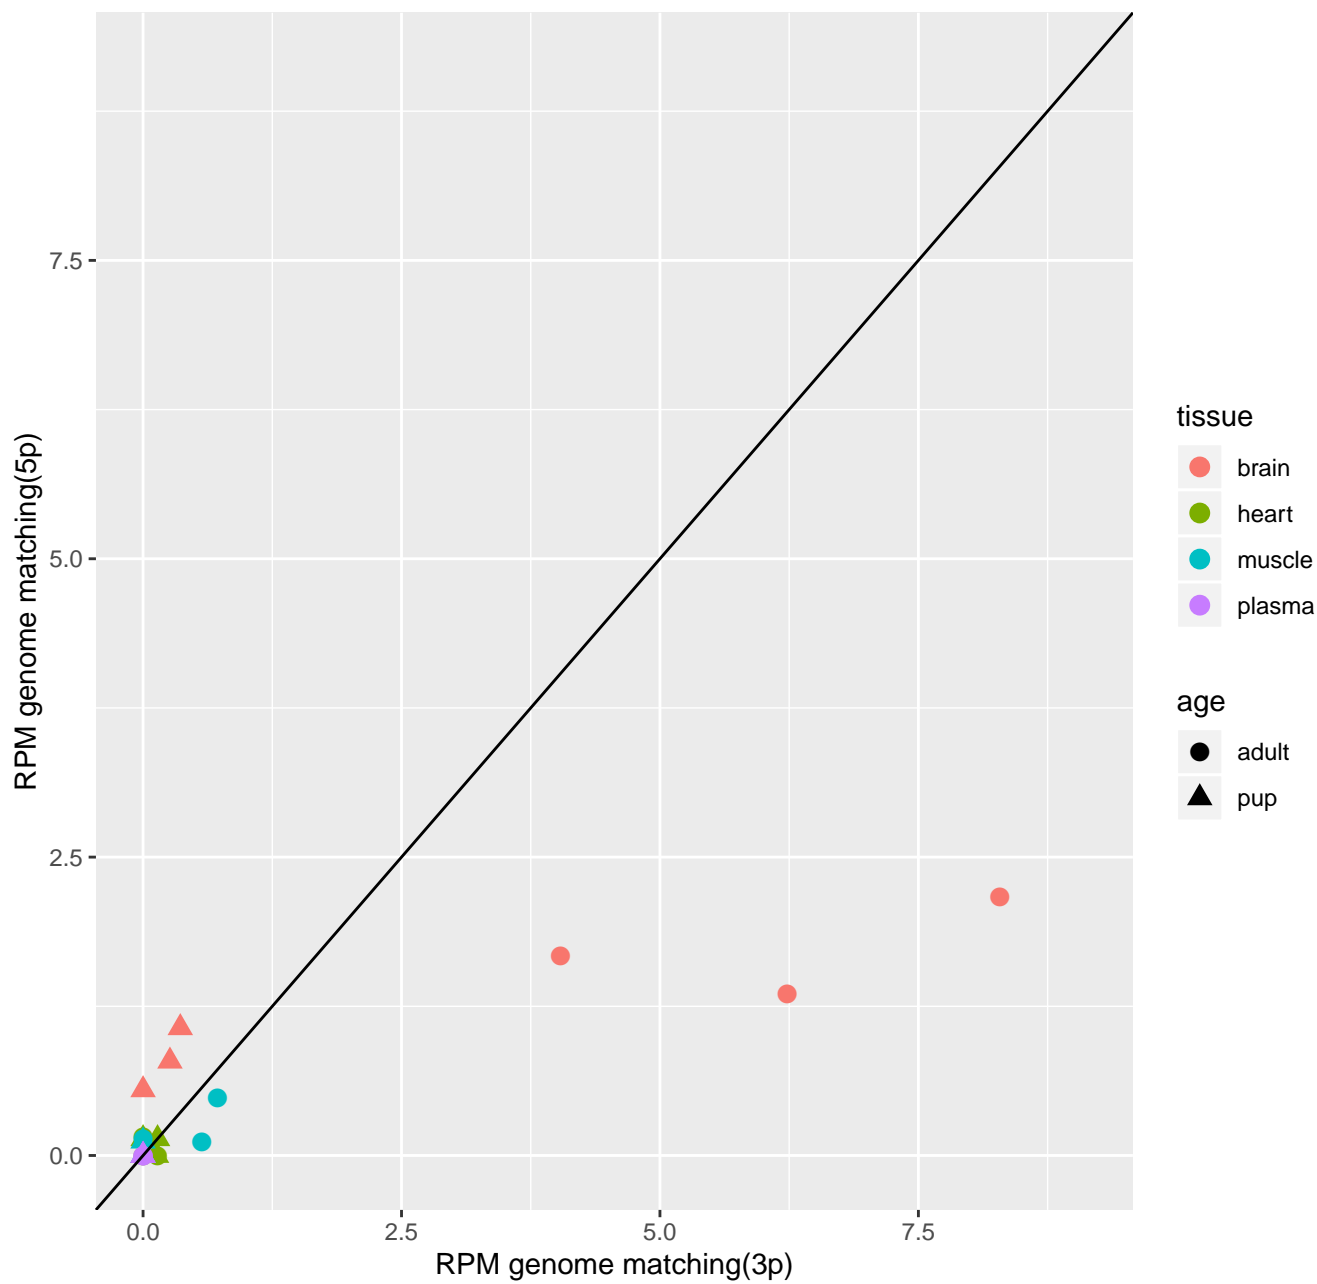

# lwe-miR-34a\_loc1

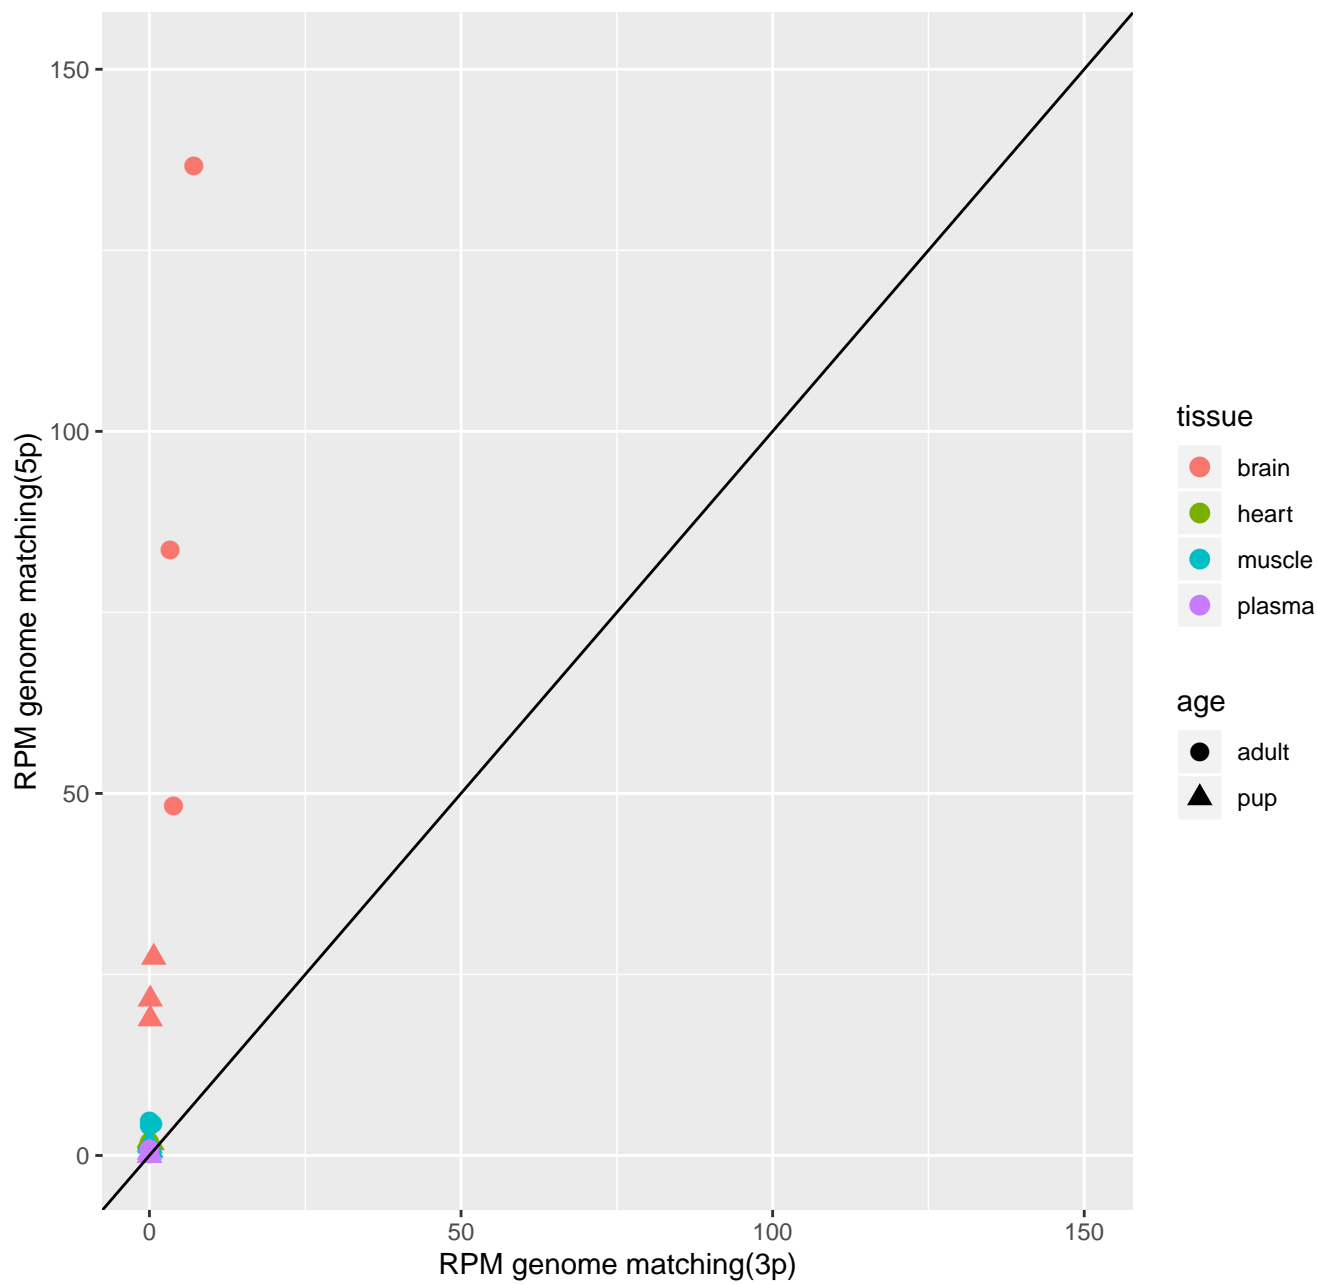



## novel\_67

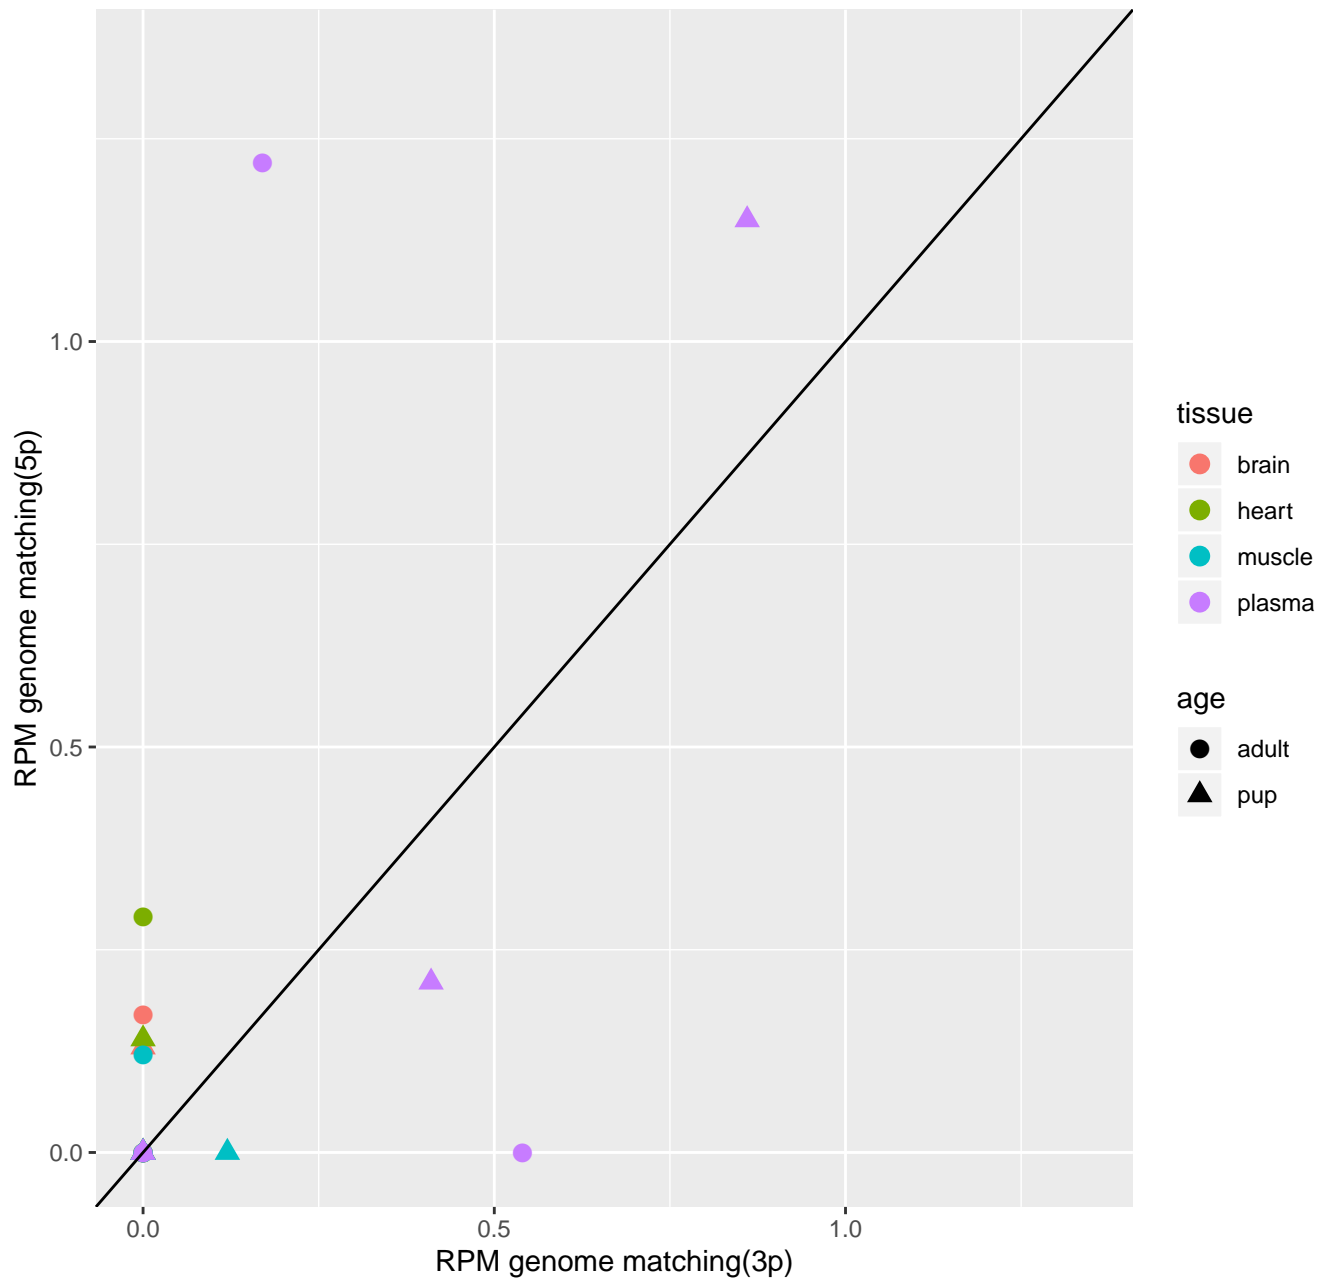

## lwe-miR-10\_loc1

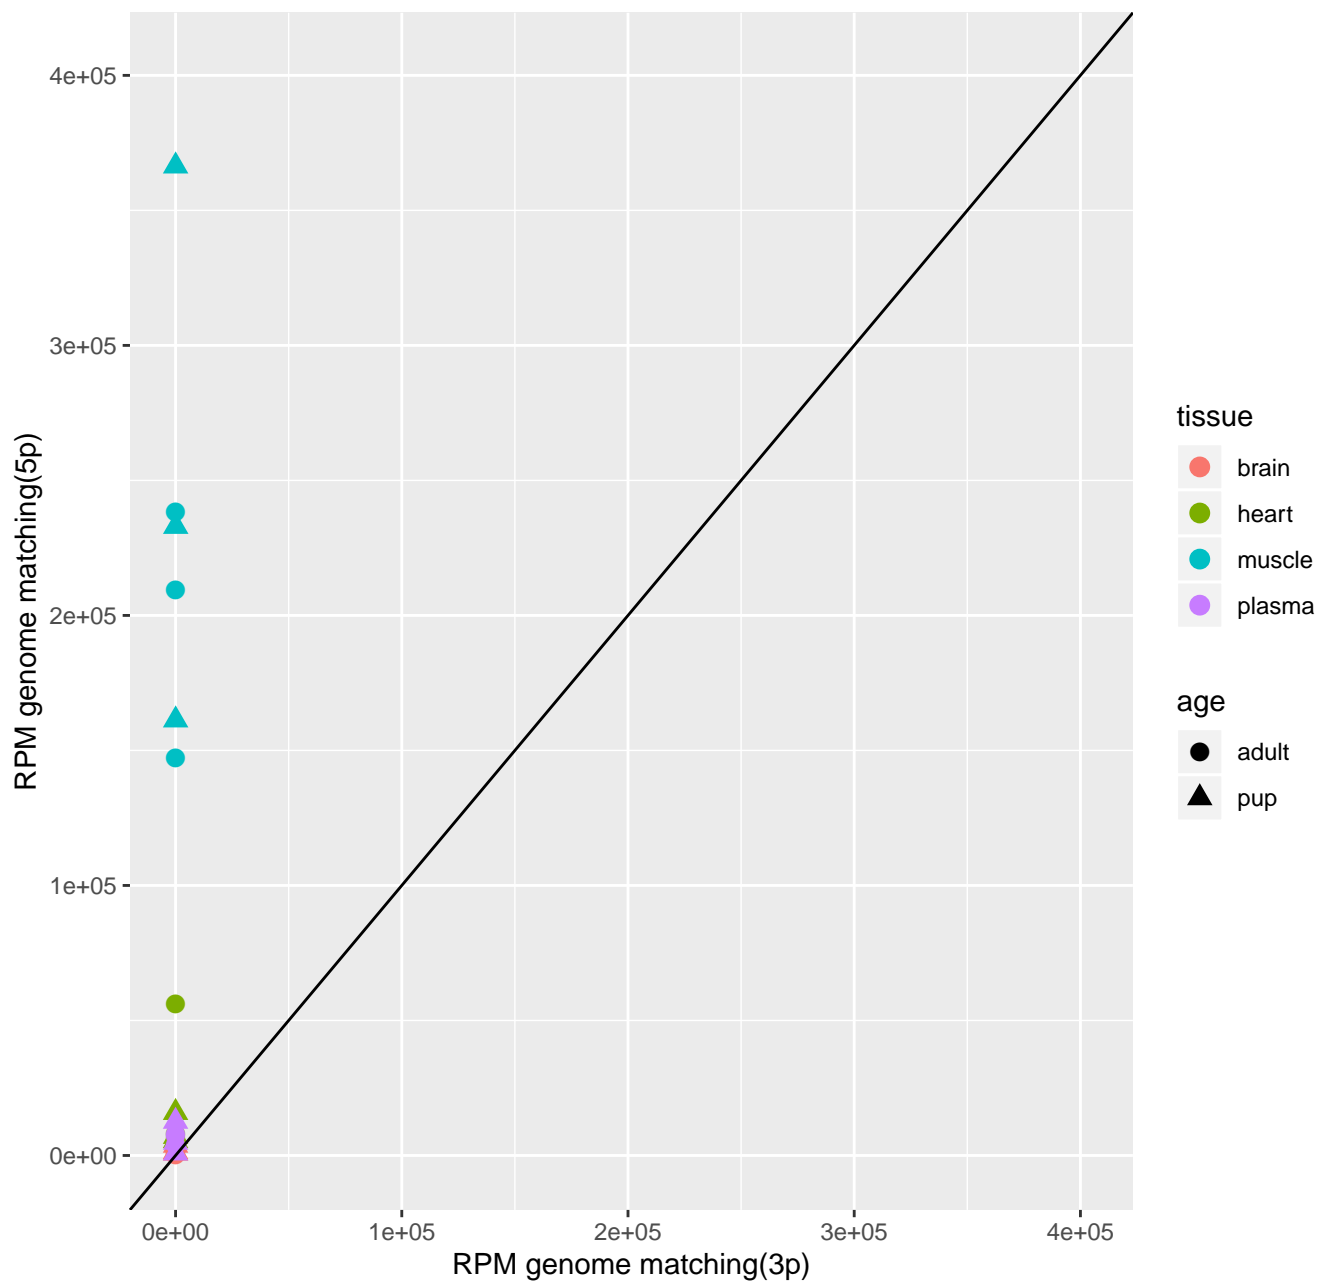

## novel\_68

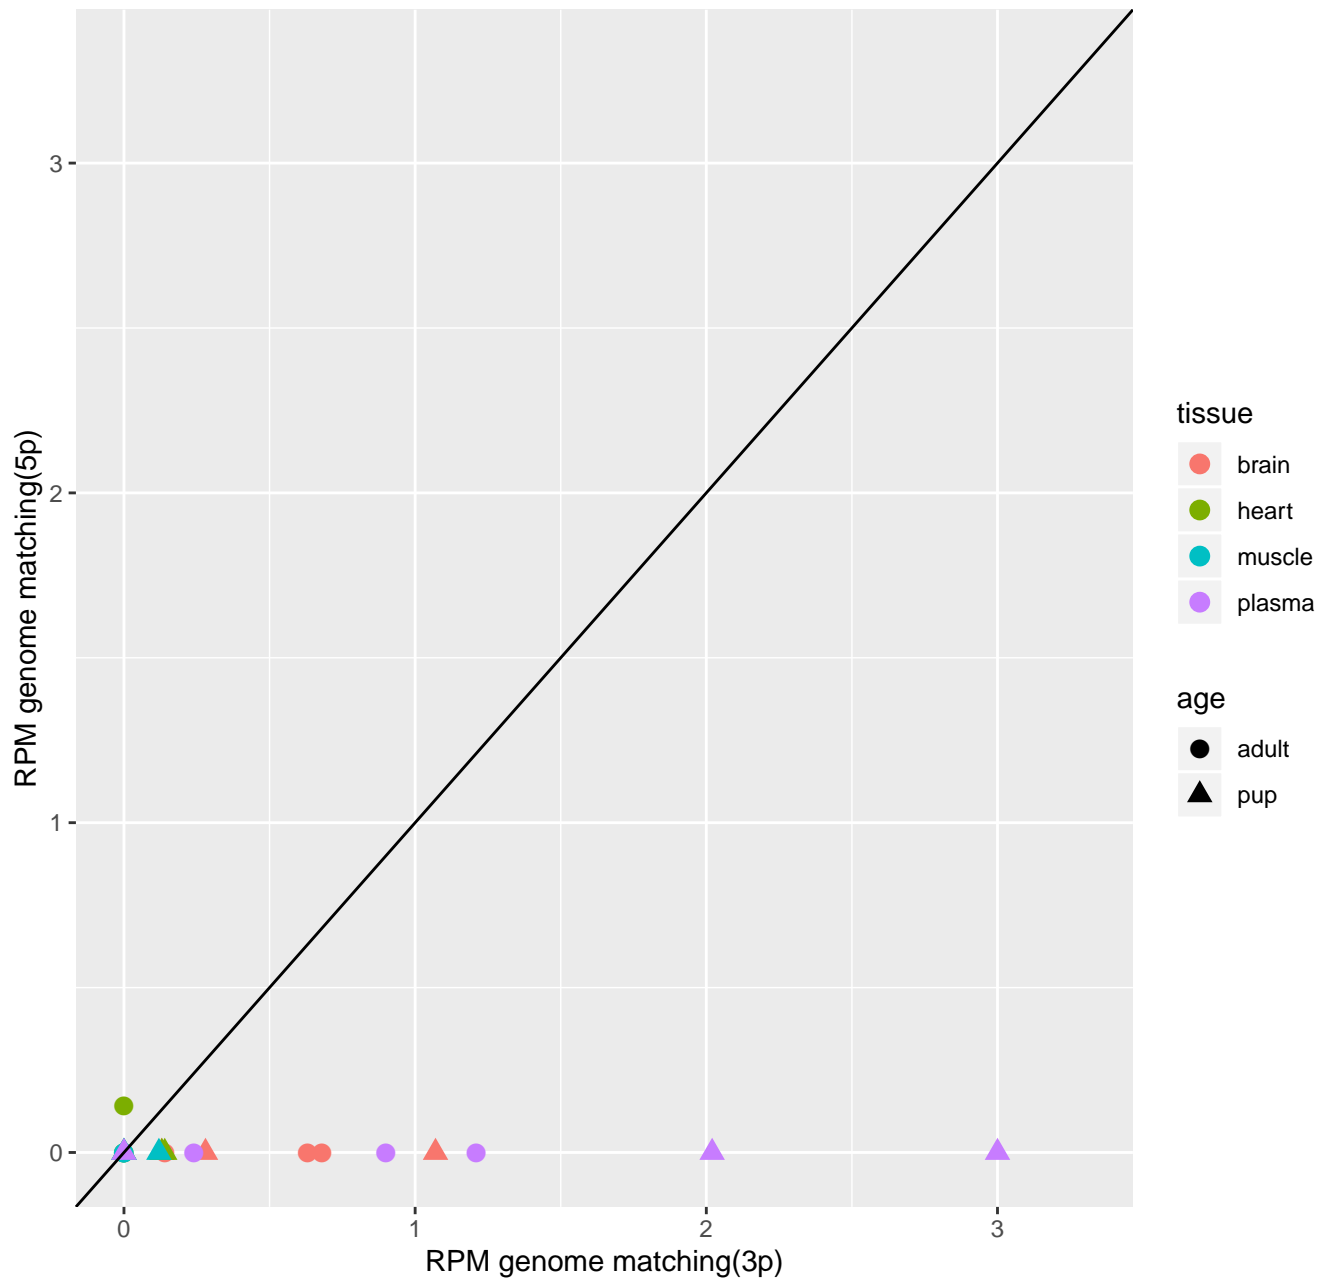

# lwe-miR-153a\_loc2

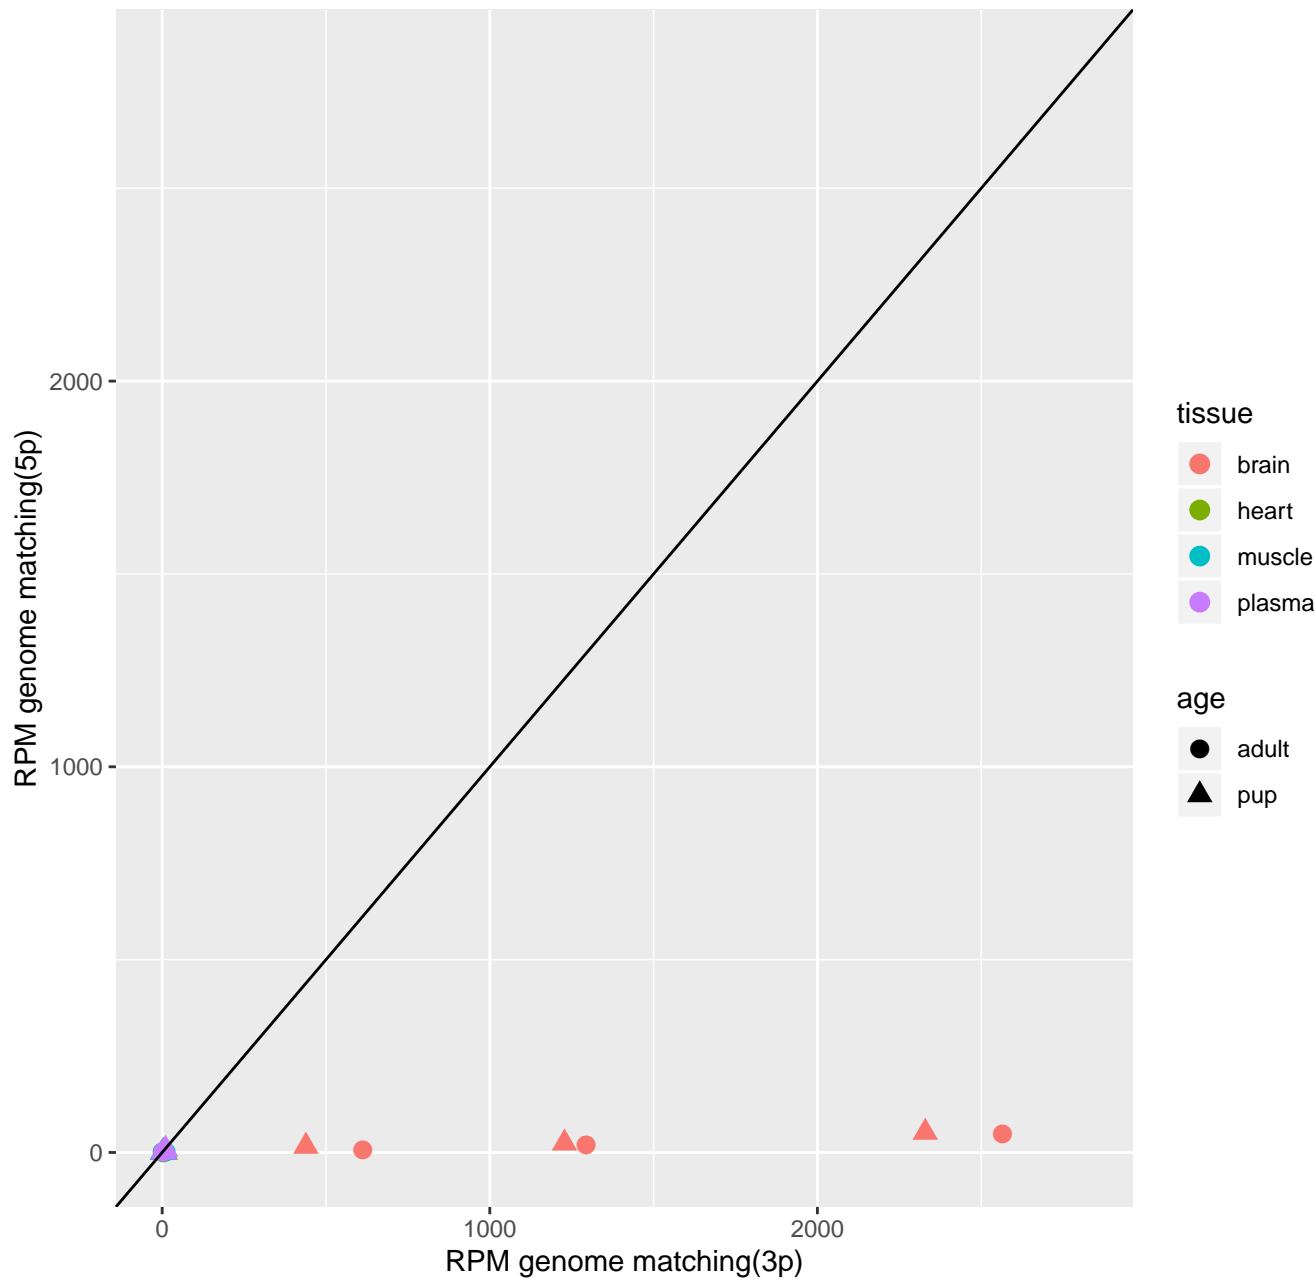

## lwe-miR-125a\_loc2

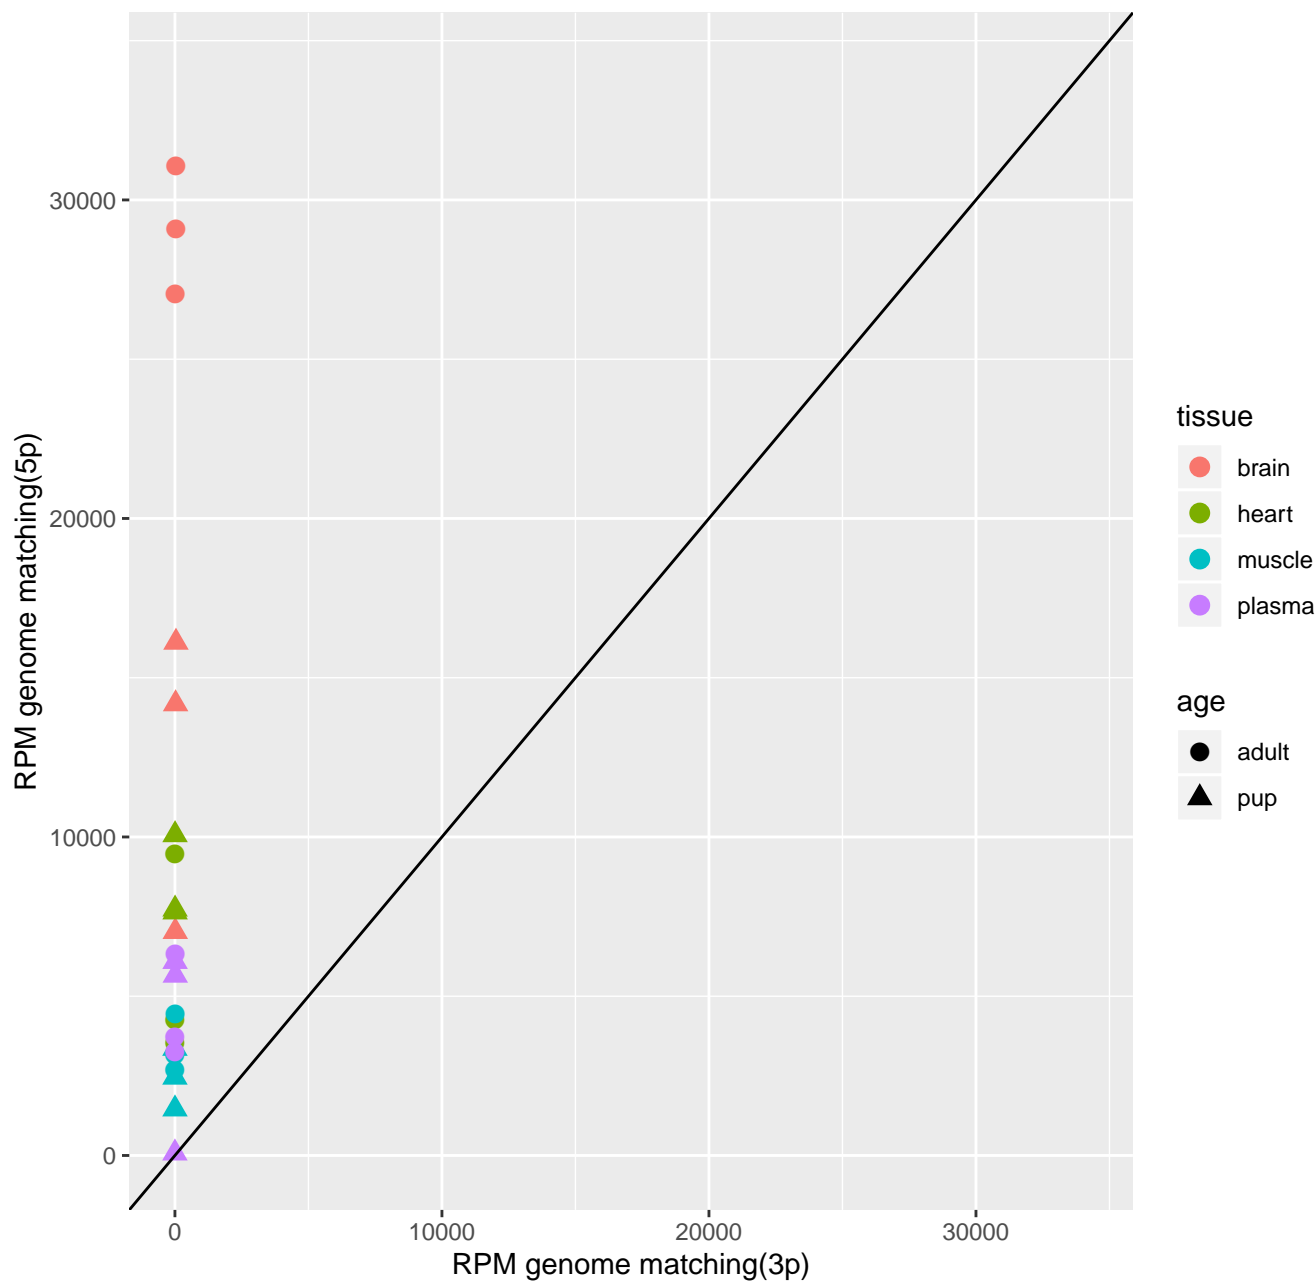

## let-7e\_loc1

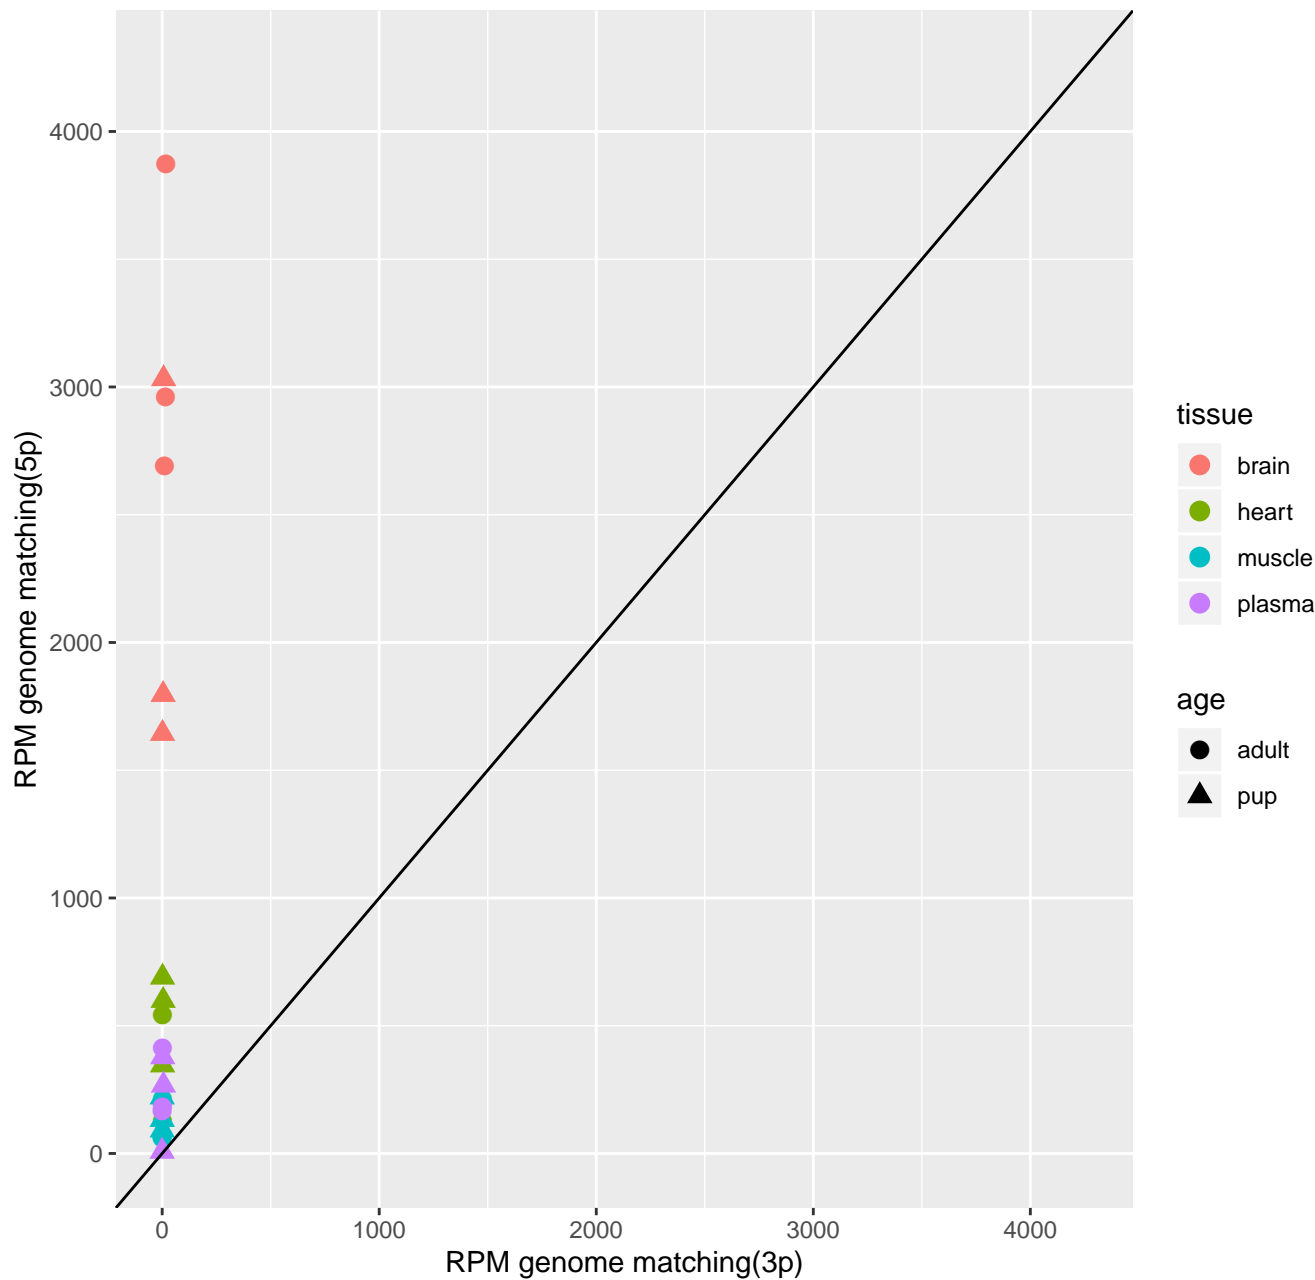

## lwe-miR-99b\_loc1

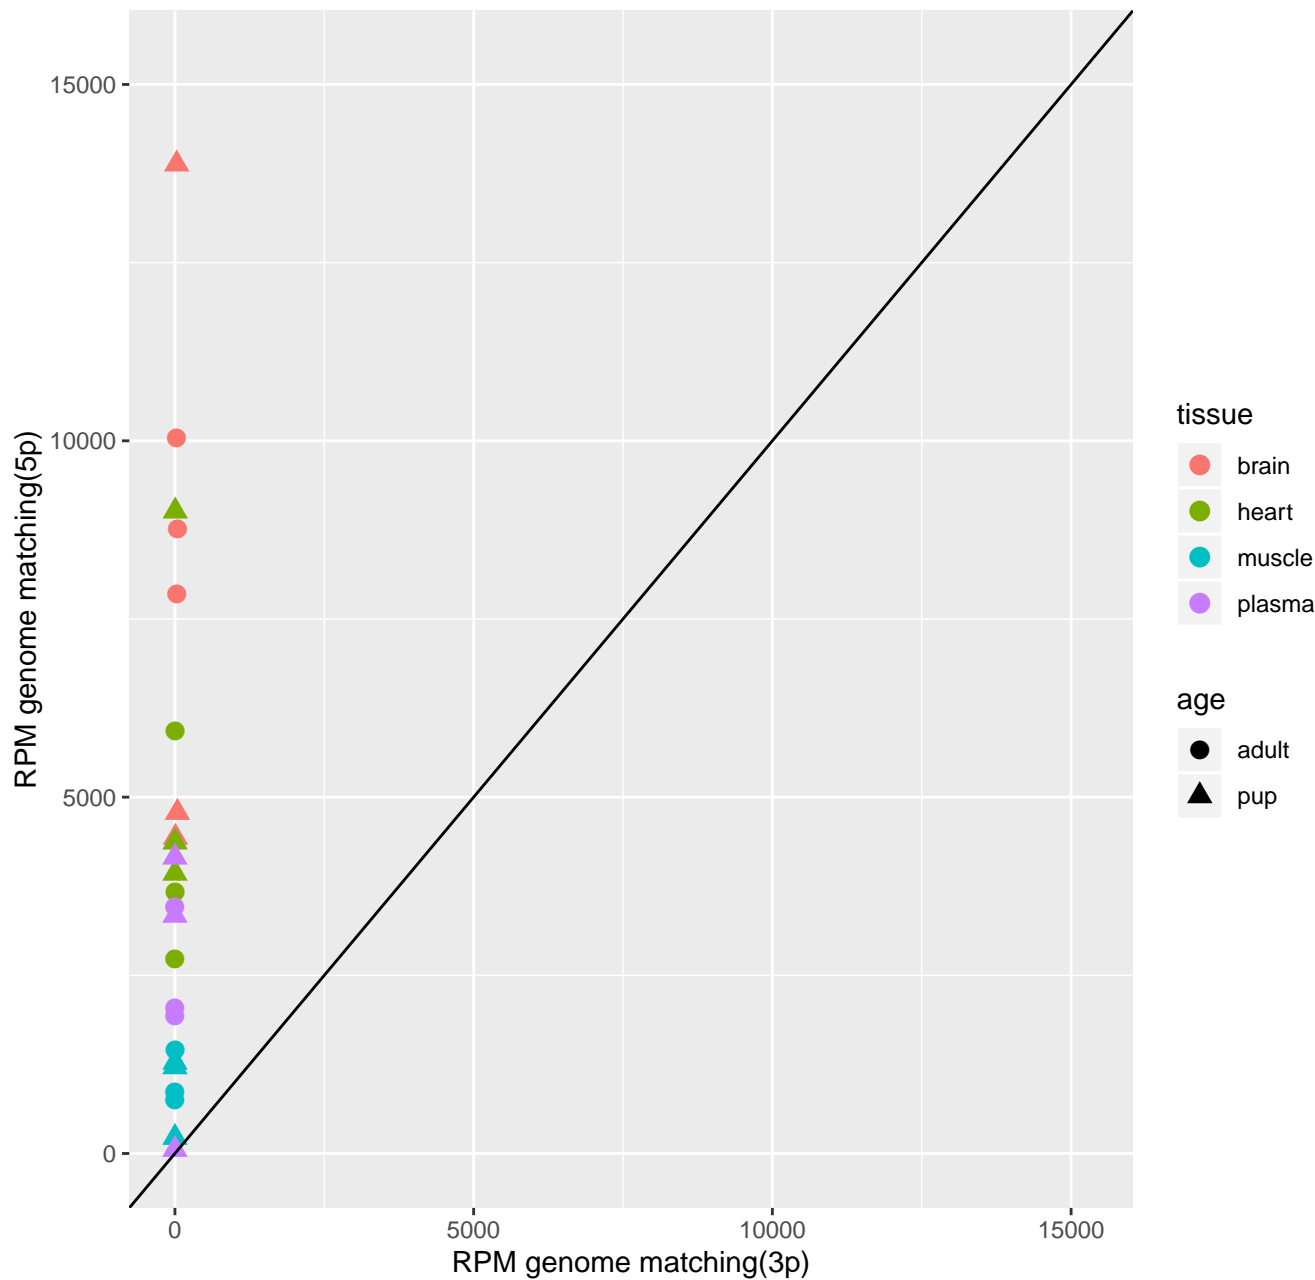

novel\_69

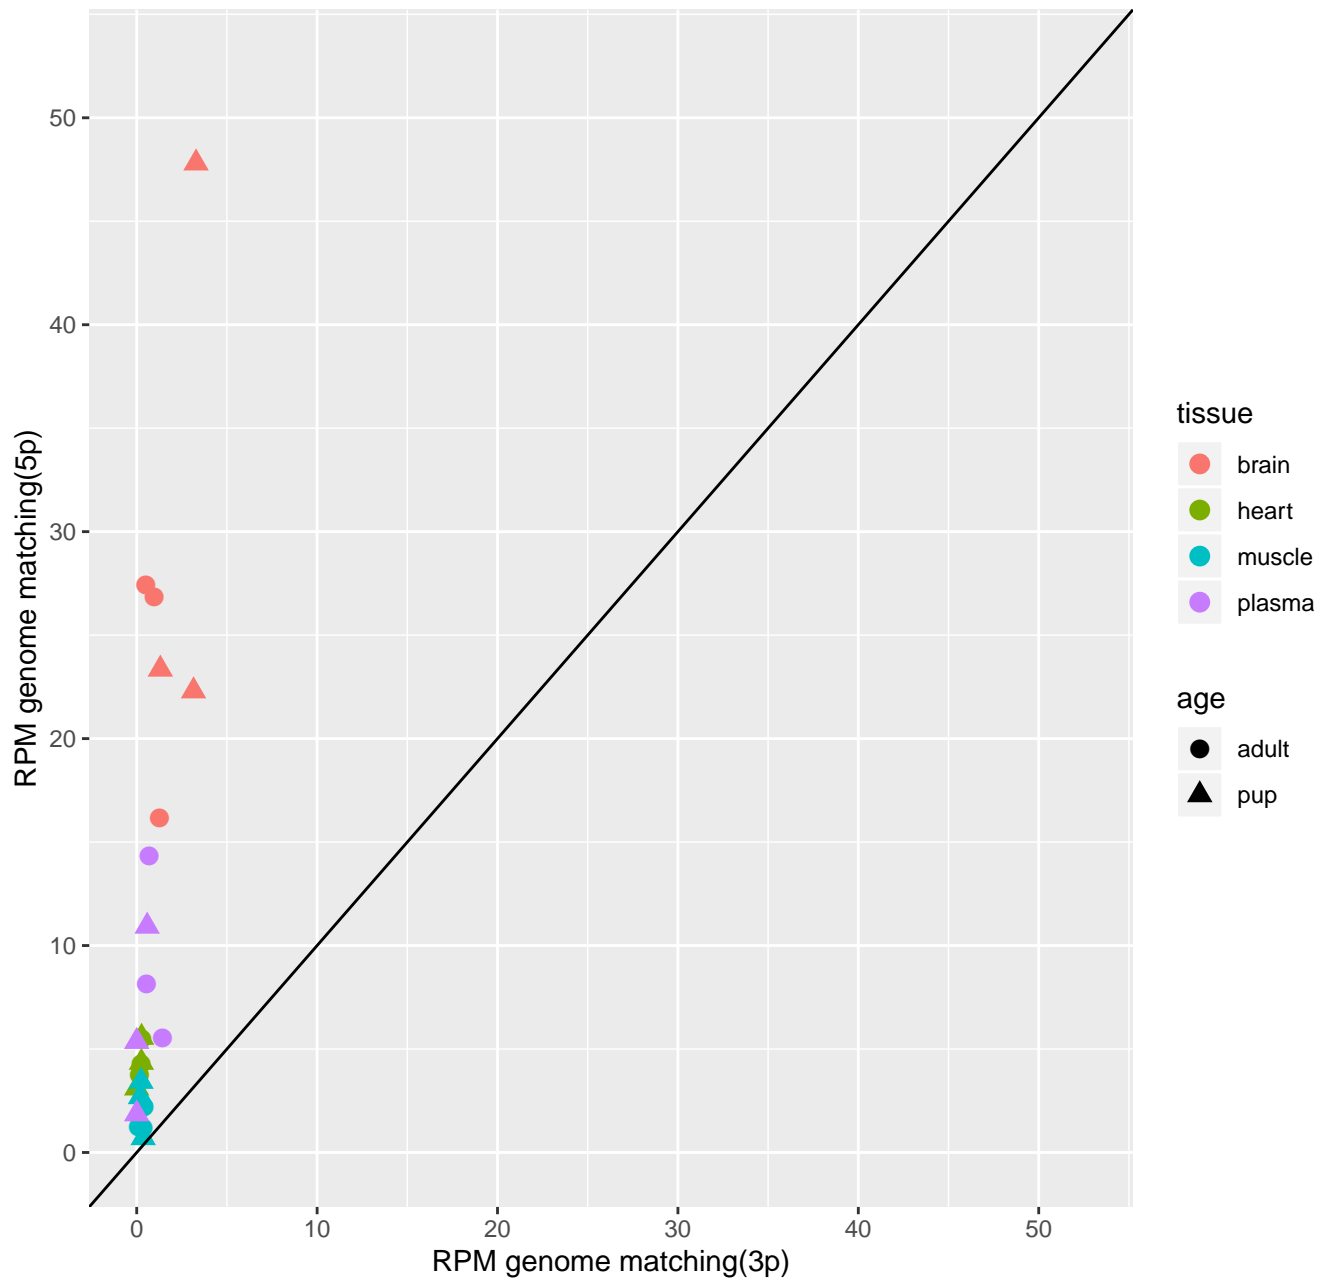



## lwe-miR-218a\_loc1

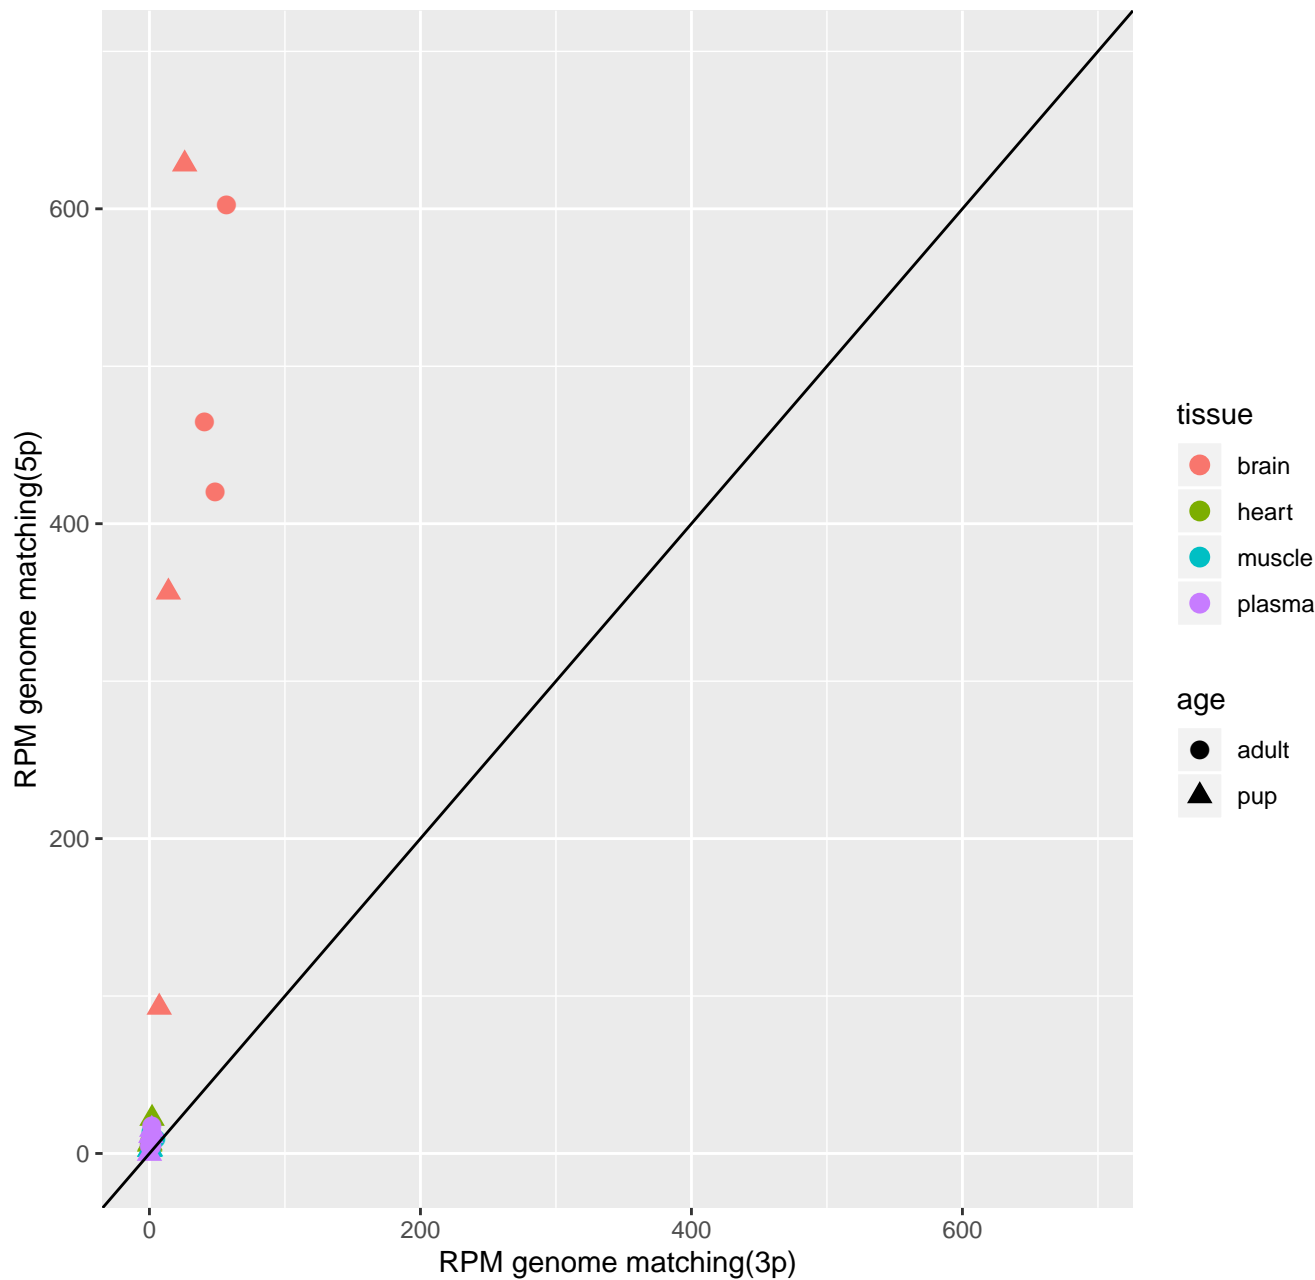

## novel\_70

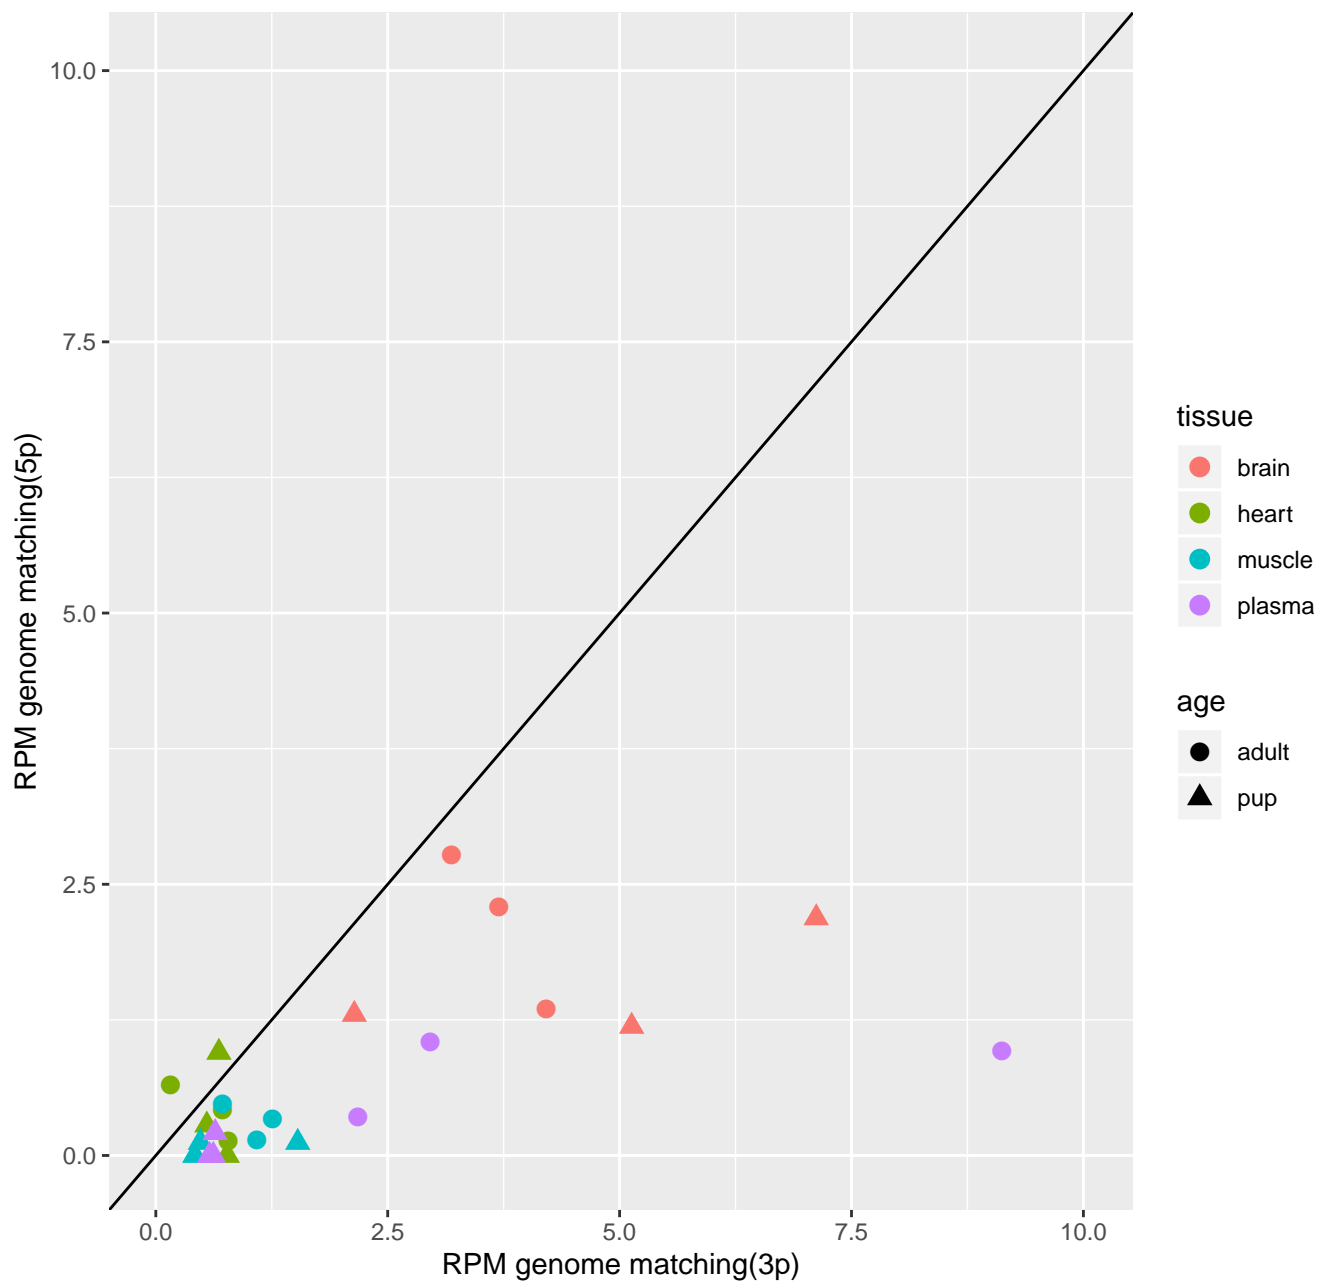

## lwe-miR-350\_loc1

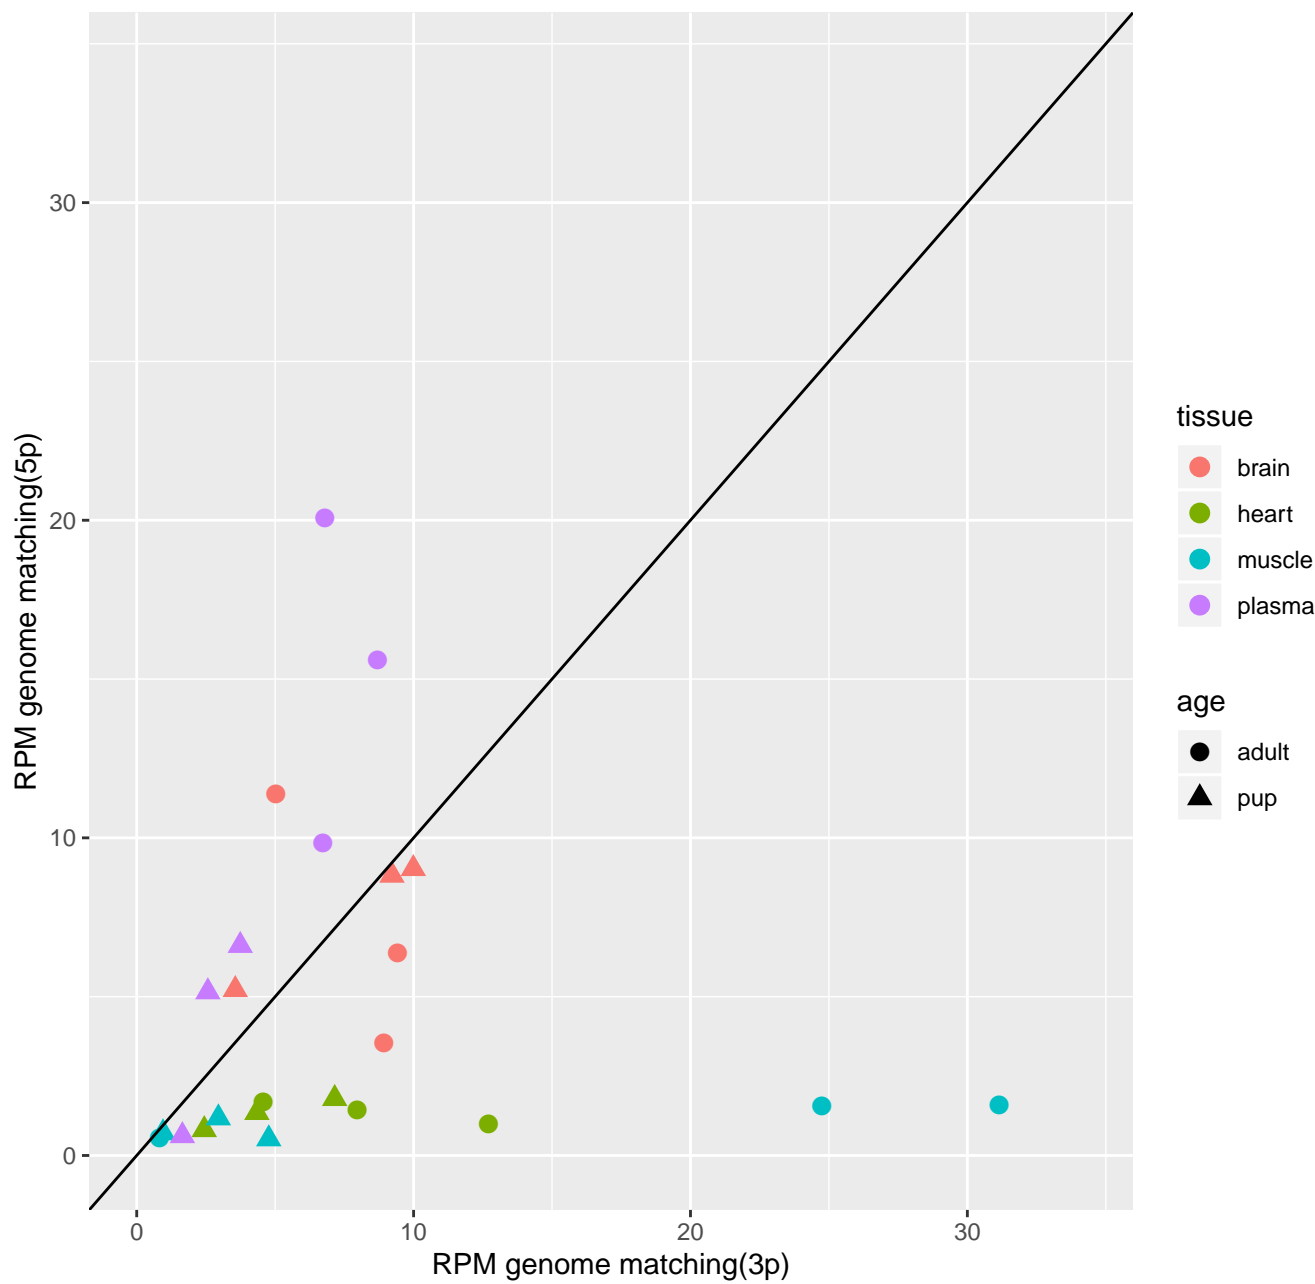

## lwe-miR-26\_loc1

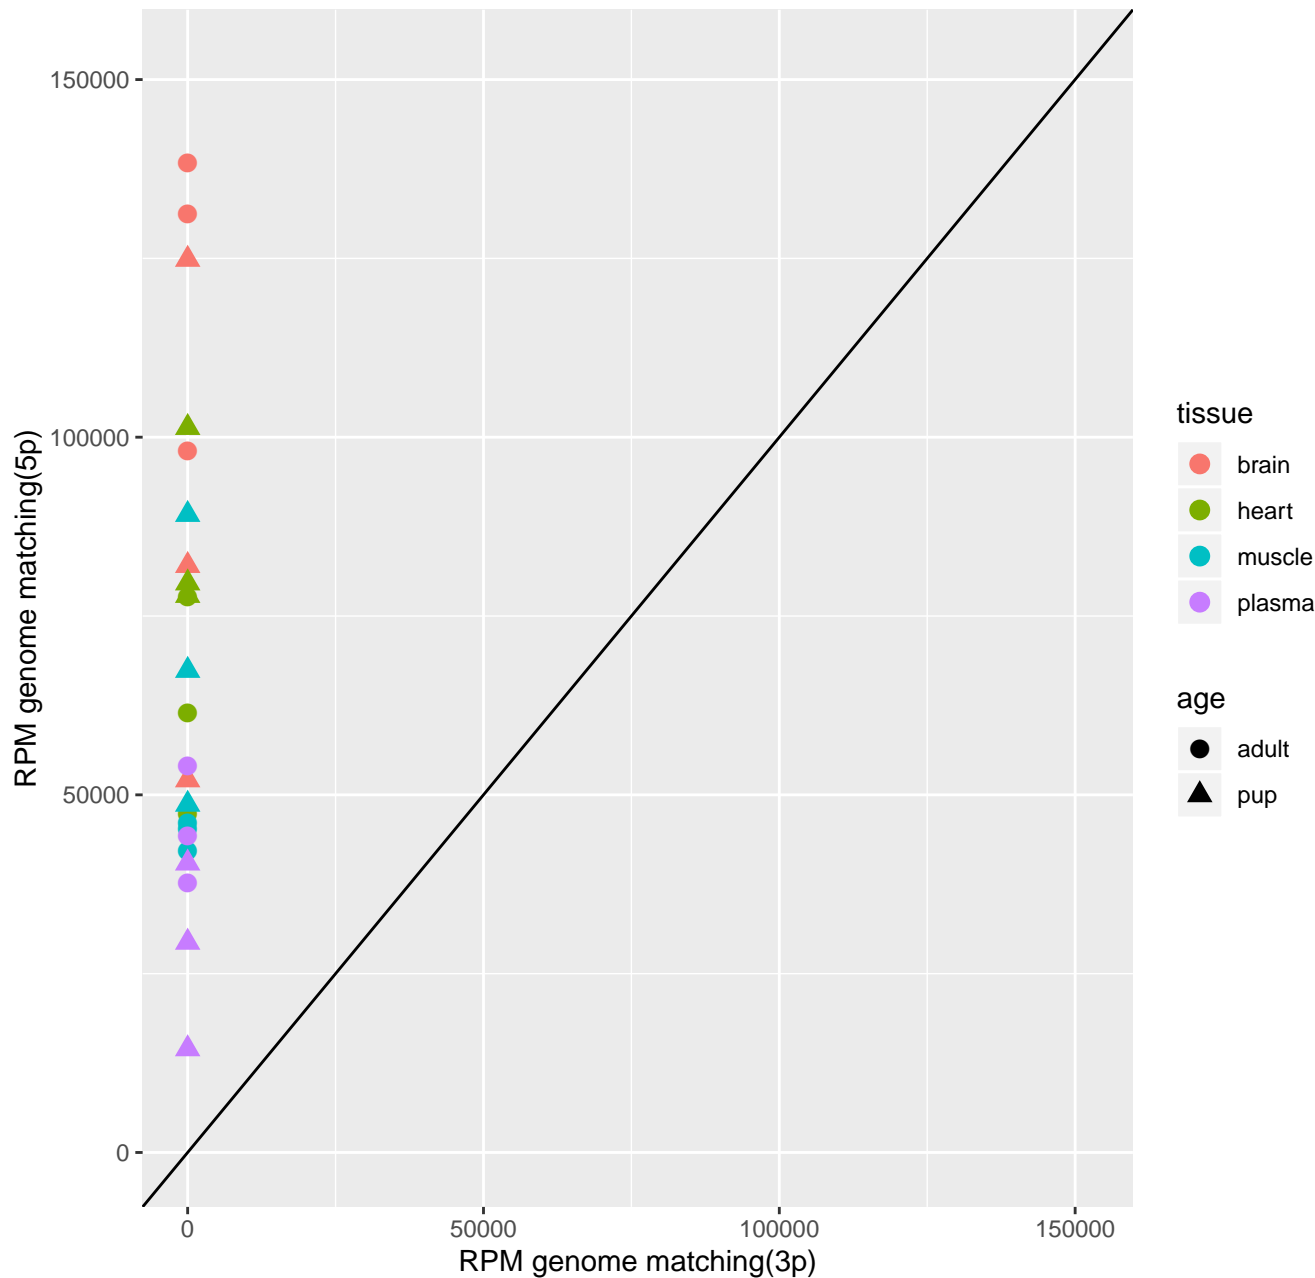

novel\_71

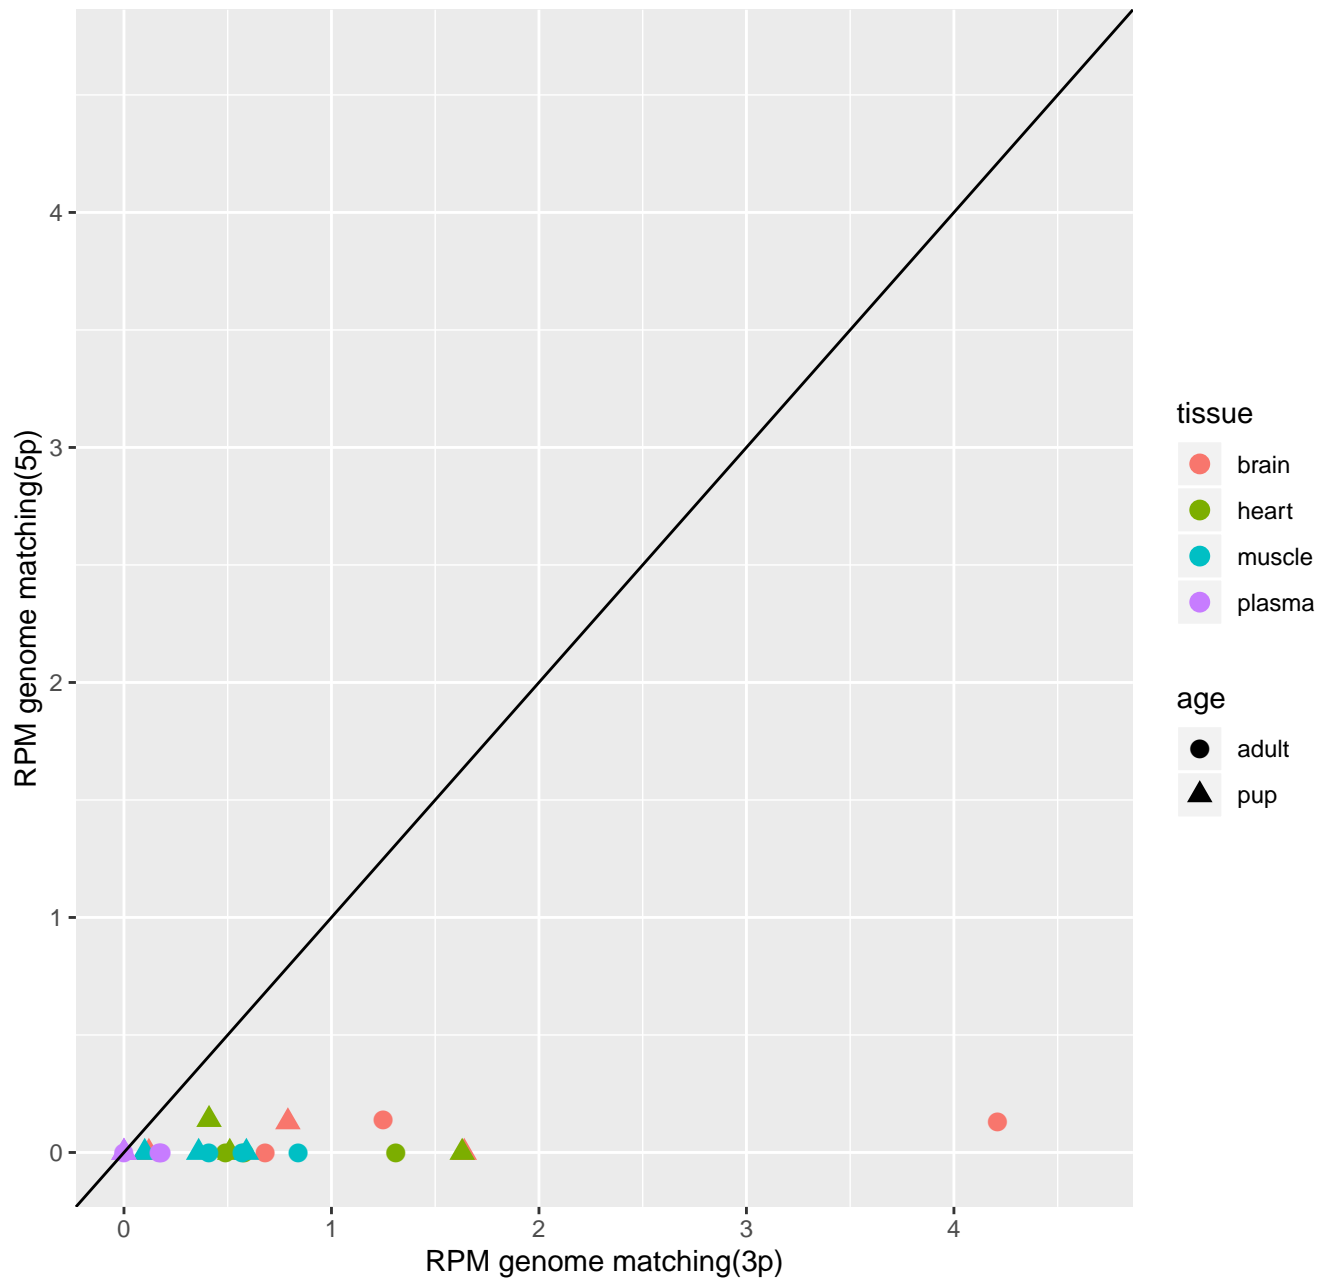

# lwe-miR-138\_loc1

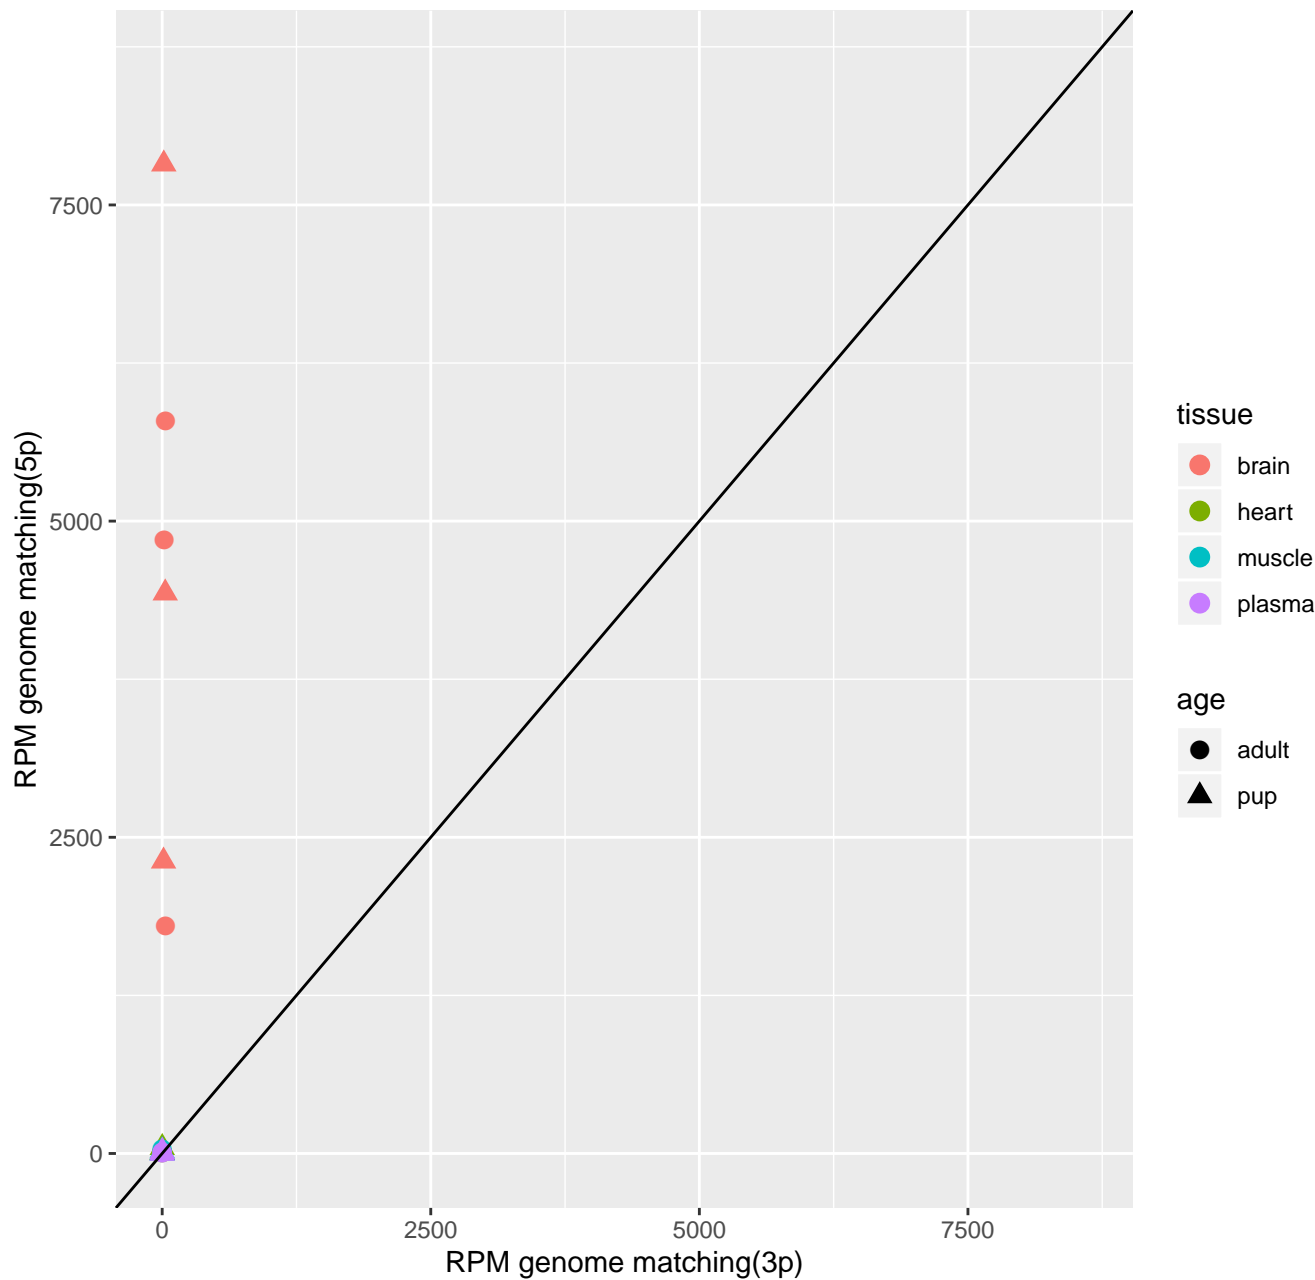

## lwe-miR-21a\_loc1

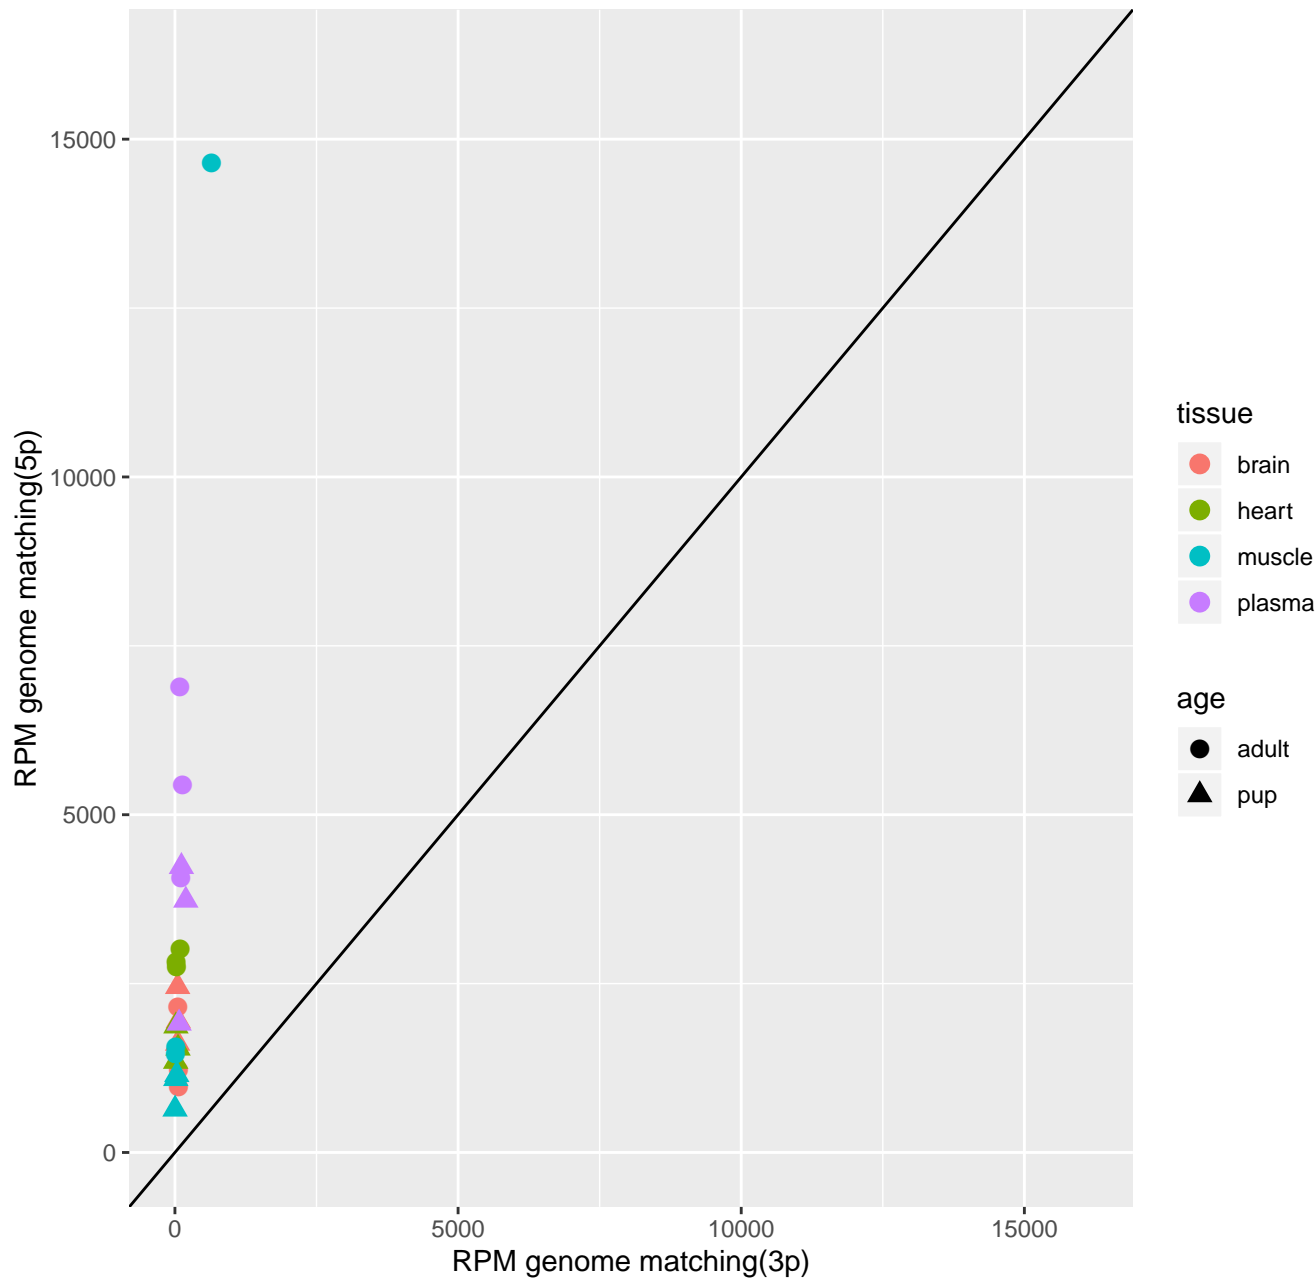

## novel\_72

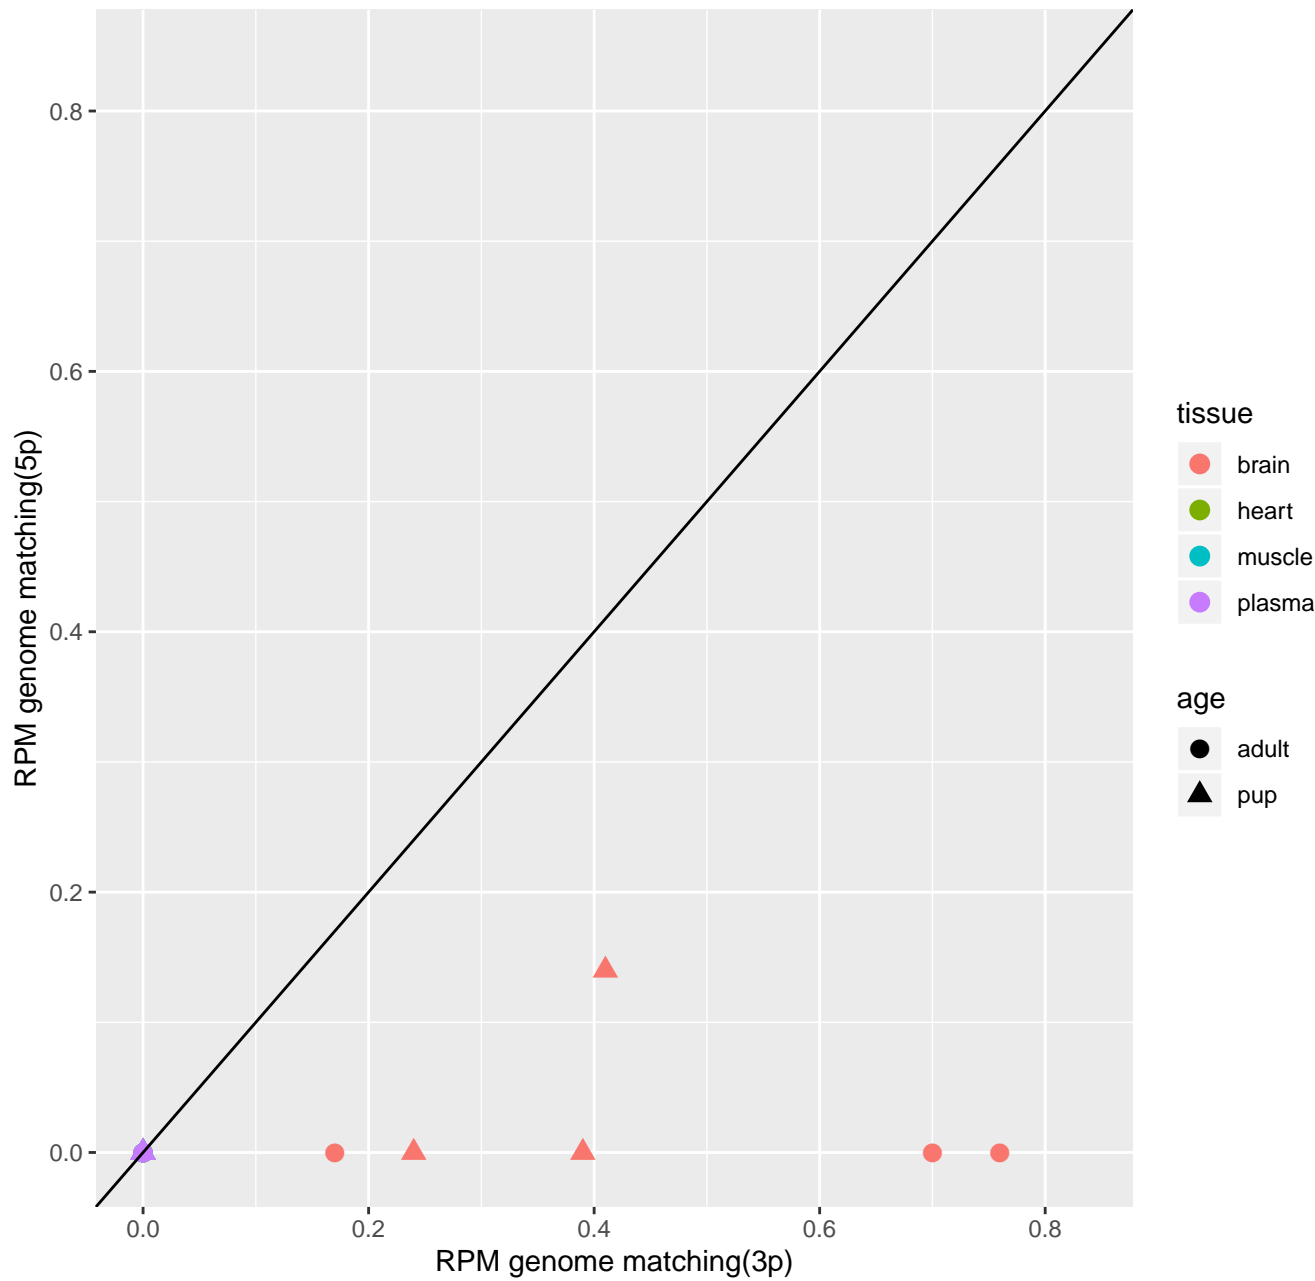



## lwe-miR-33a\_loc1

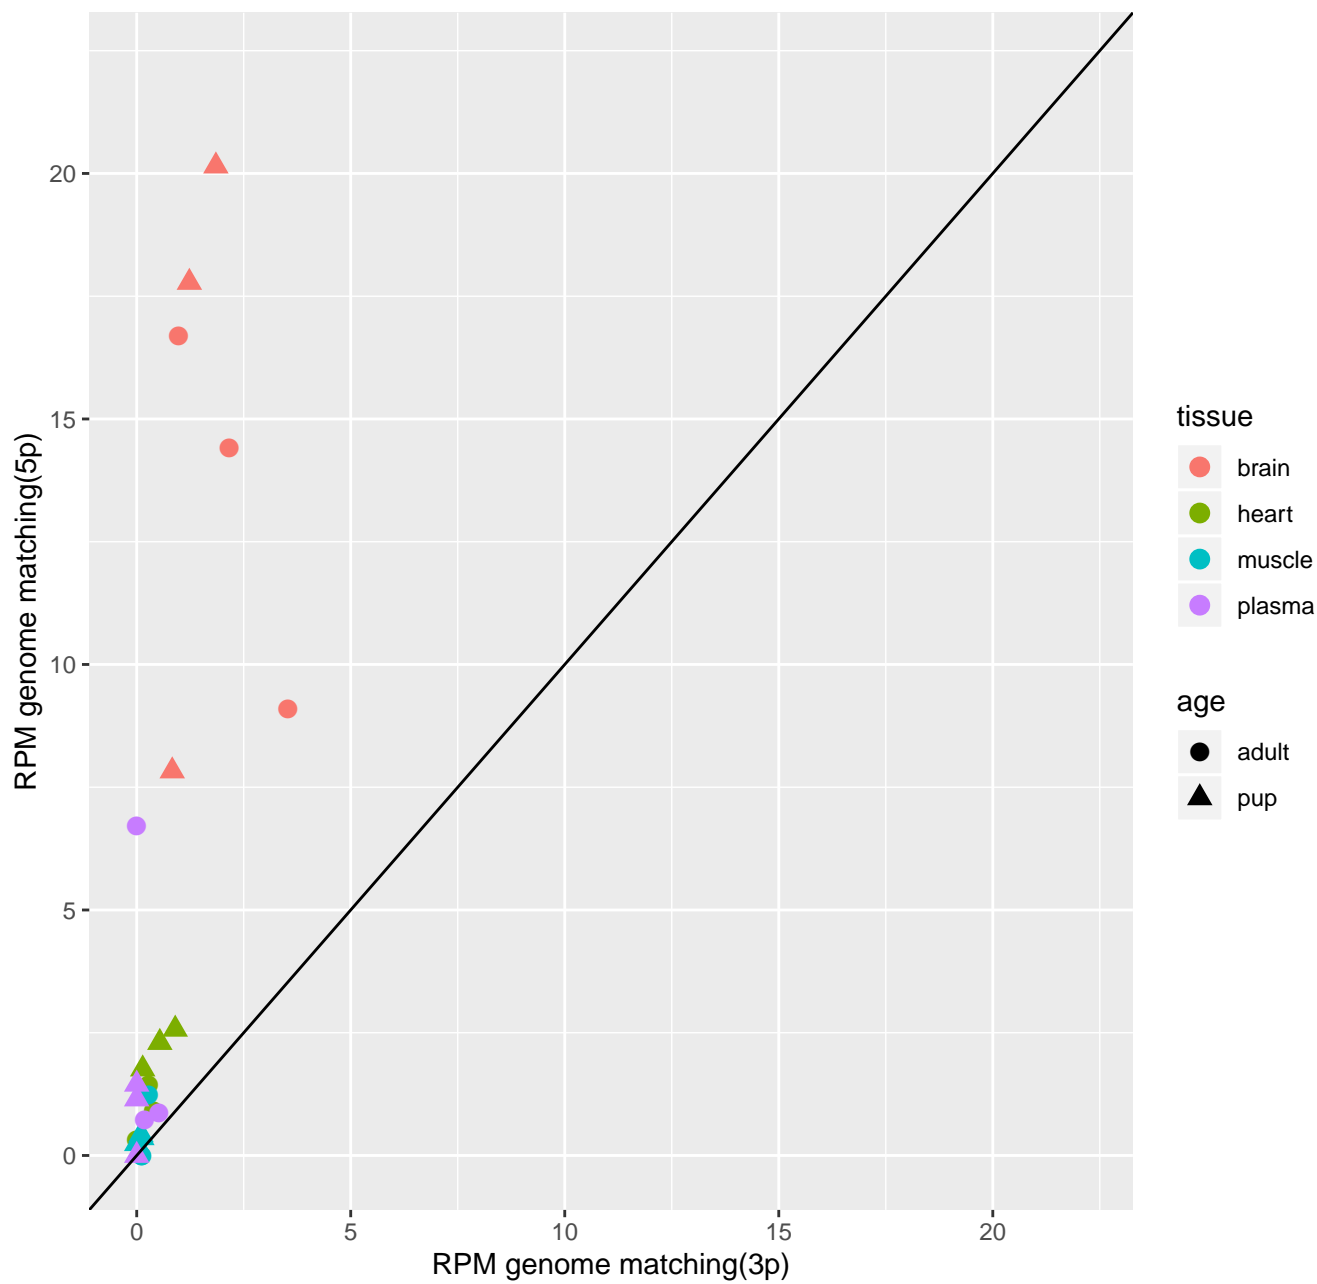



# lwe-miR-378a\_loc1

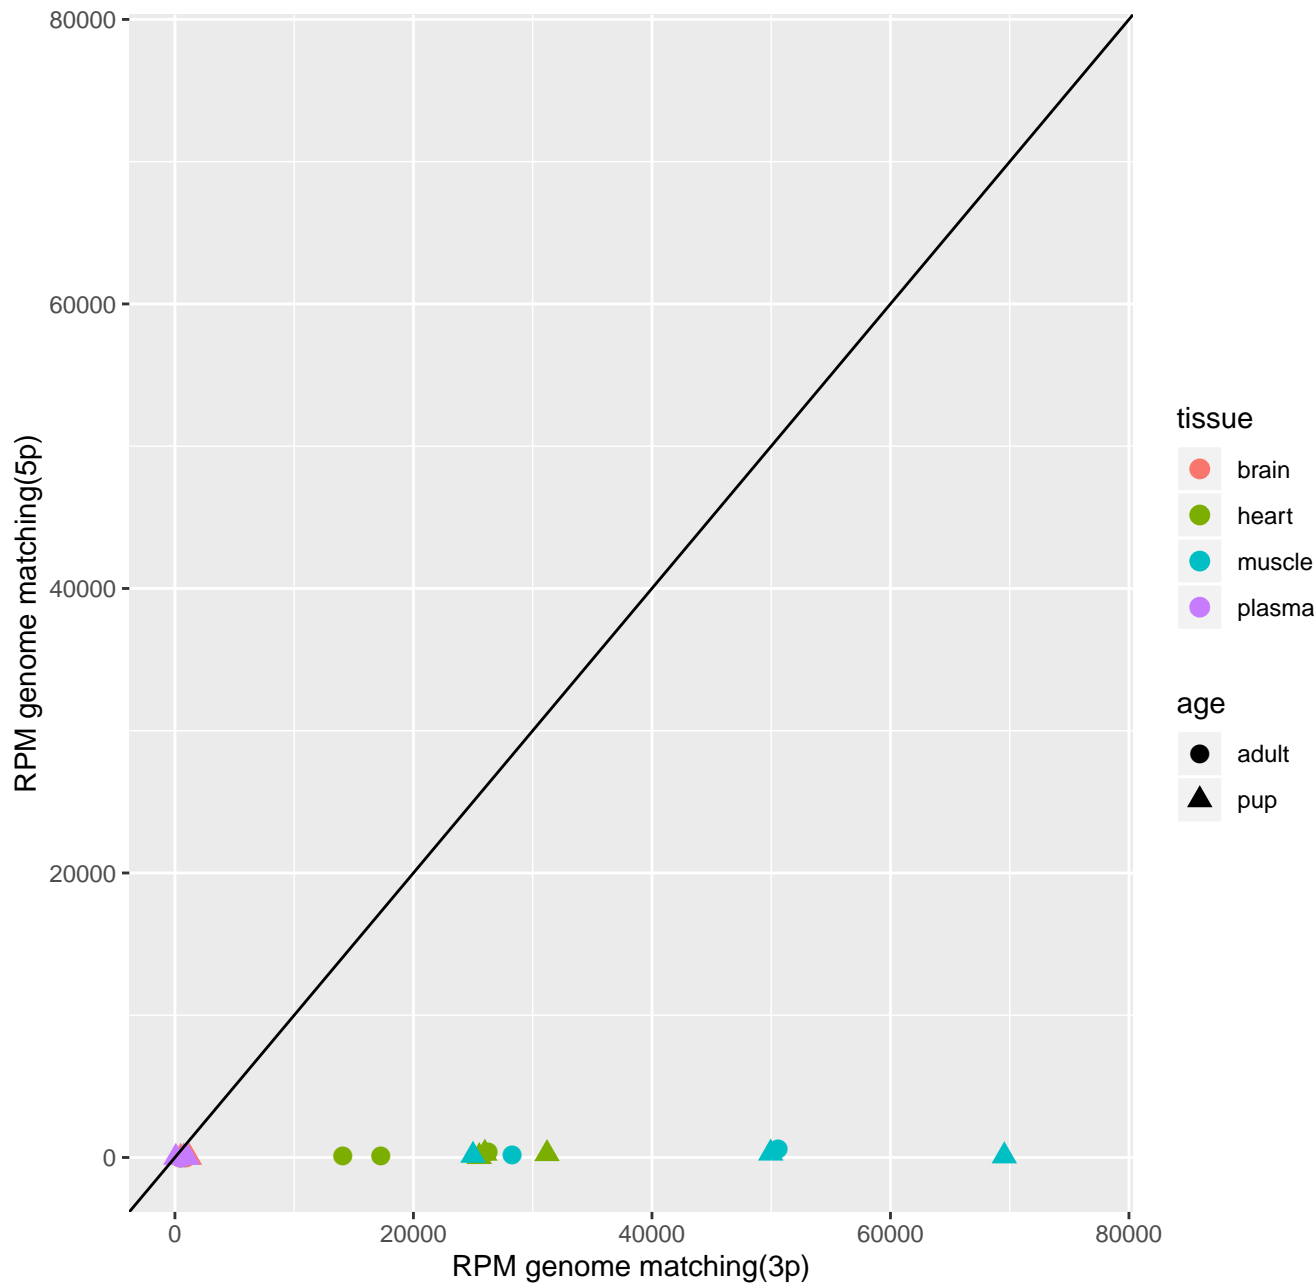

# lve-miR-551b\_loc1

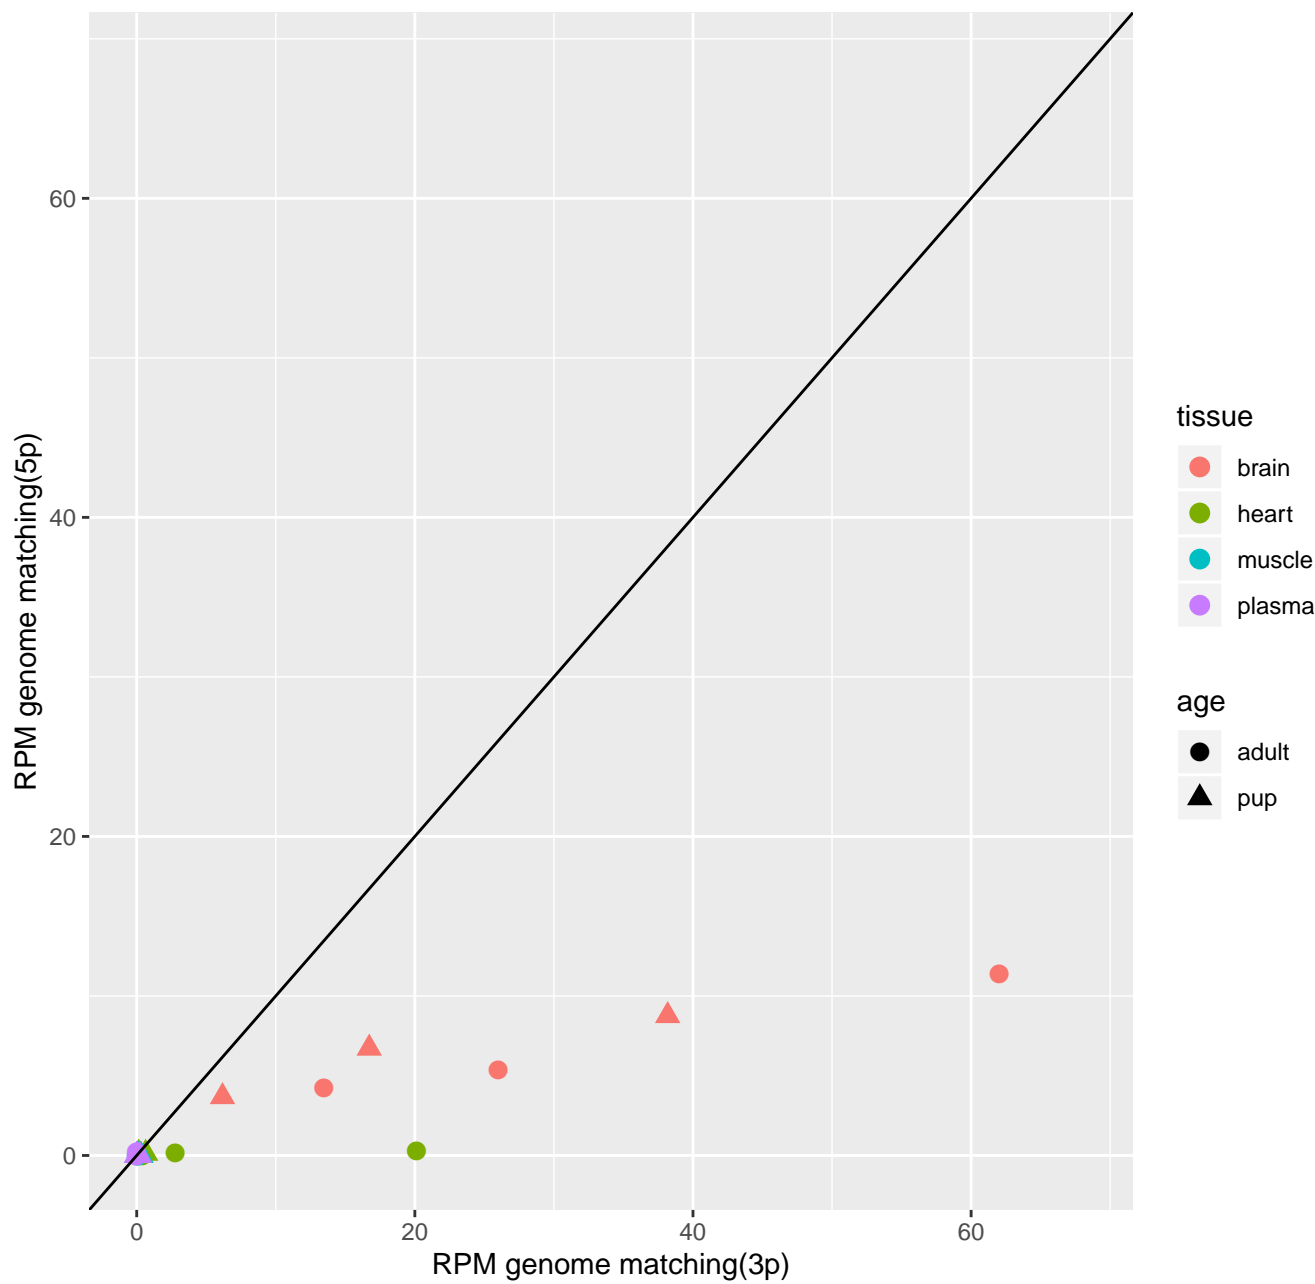

novel\_73

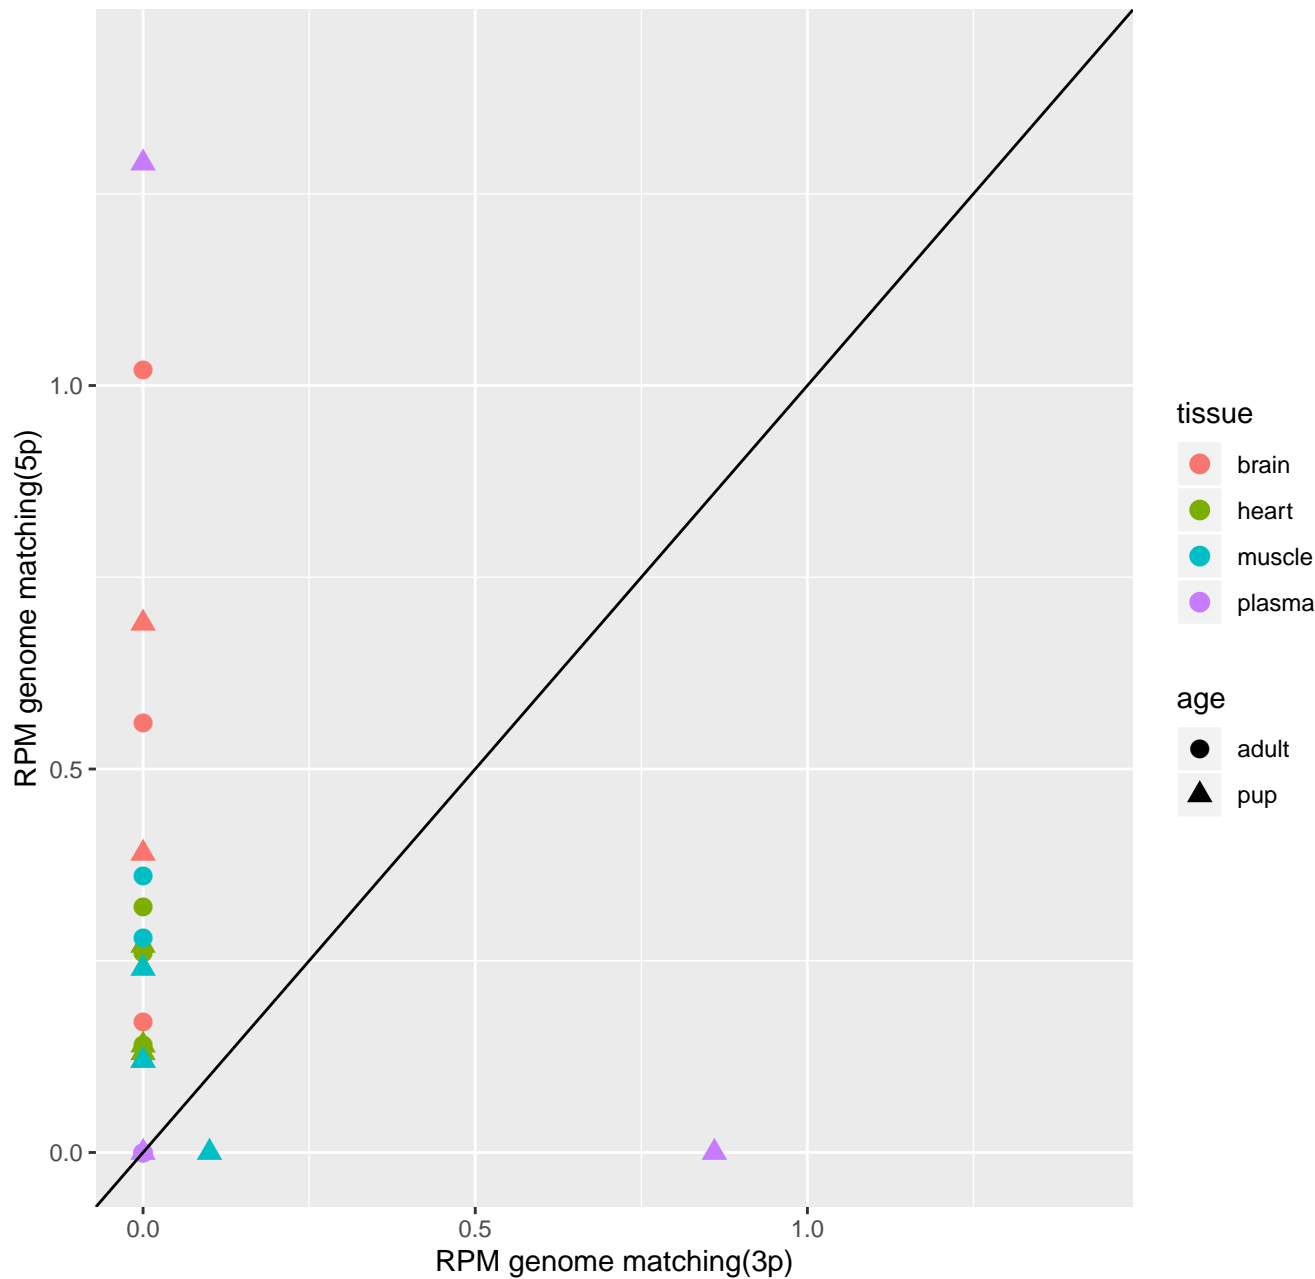

# lwe-miR-132\_loc1

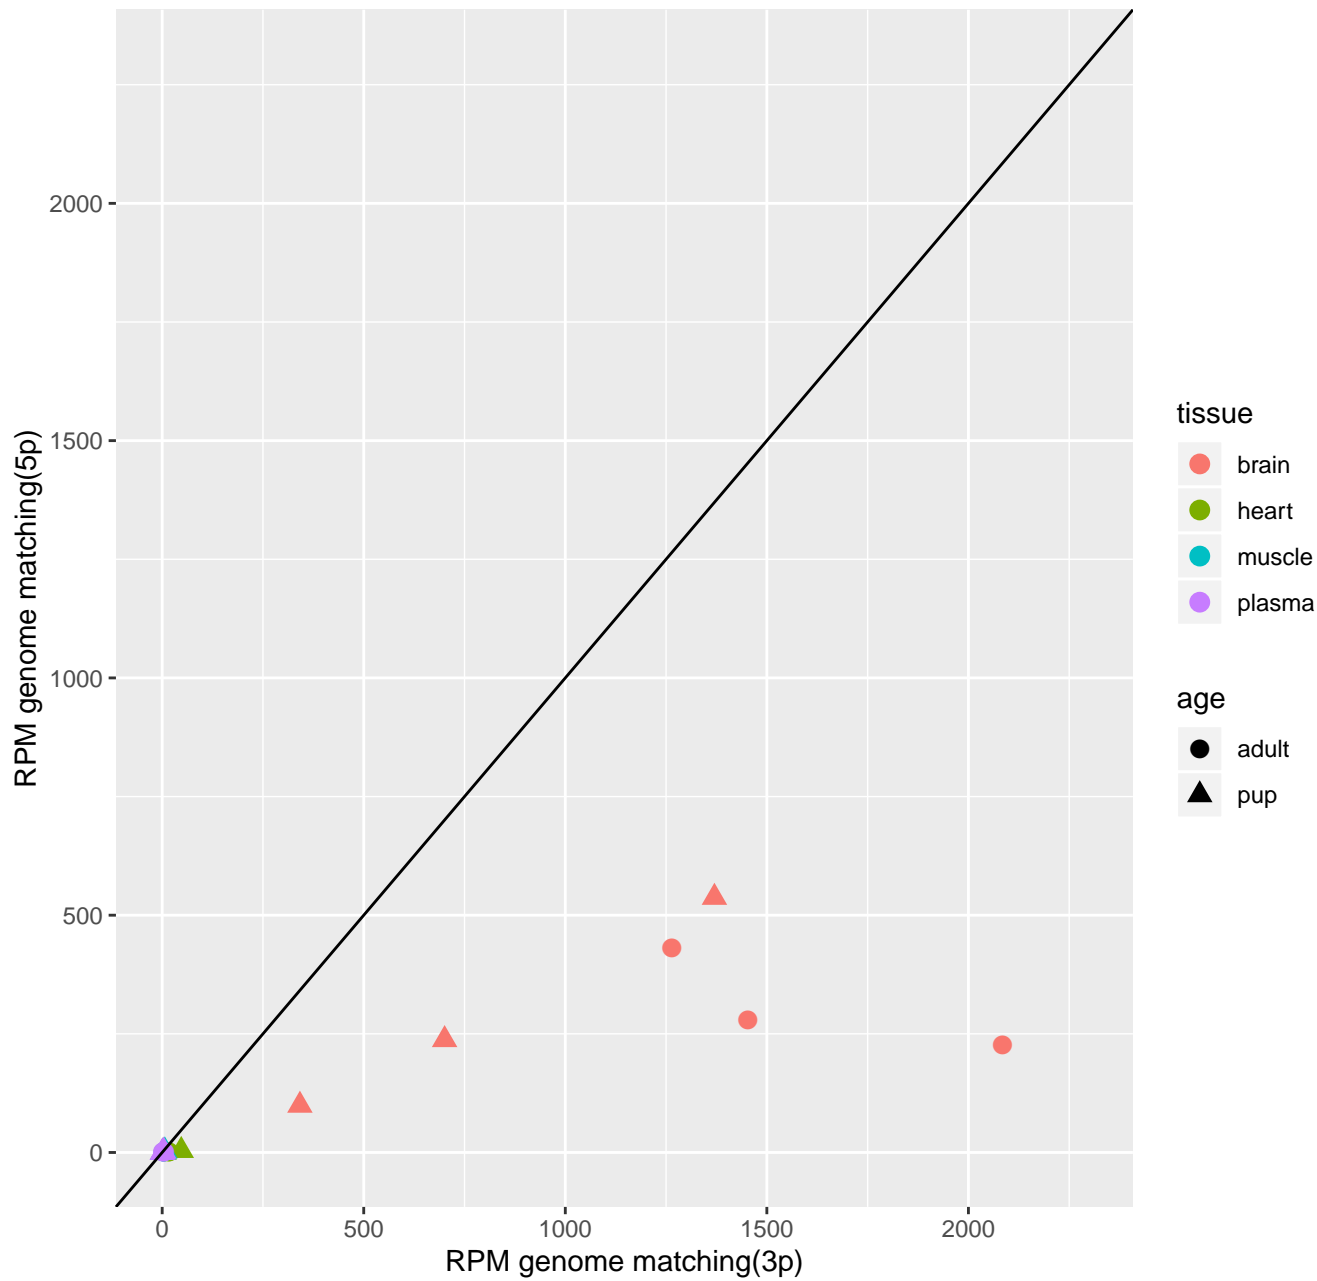

# lwe-miR-212\_loc1

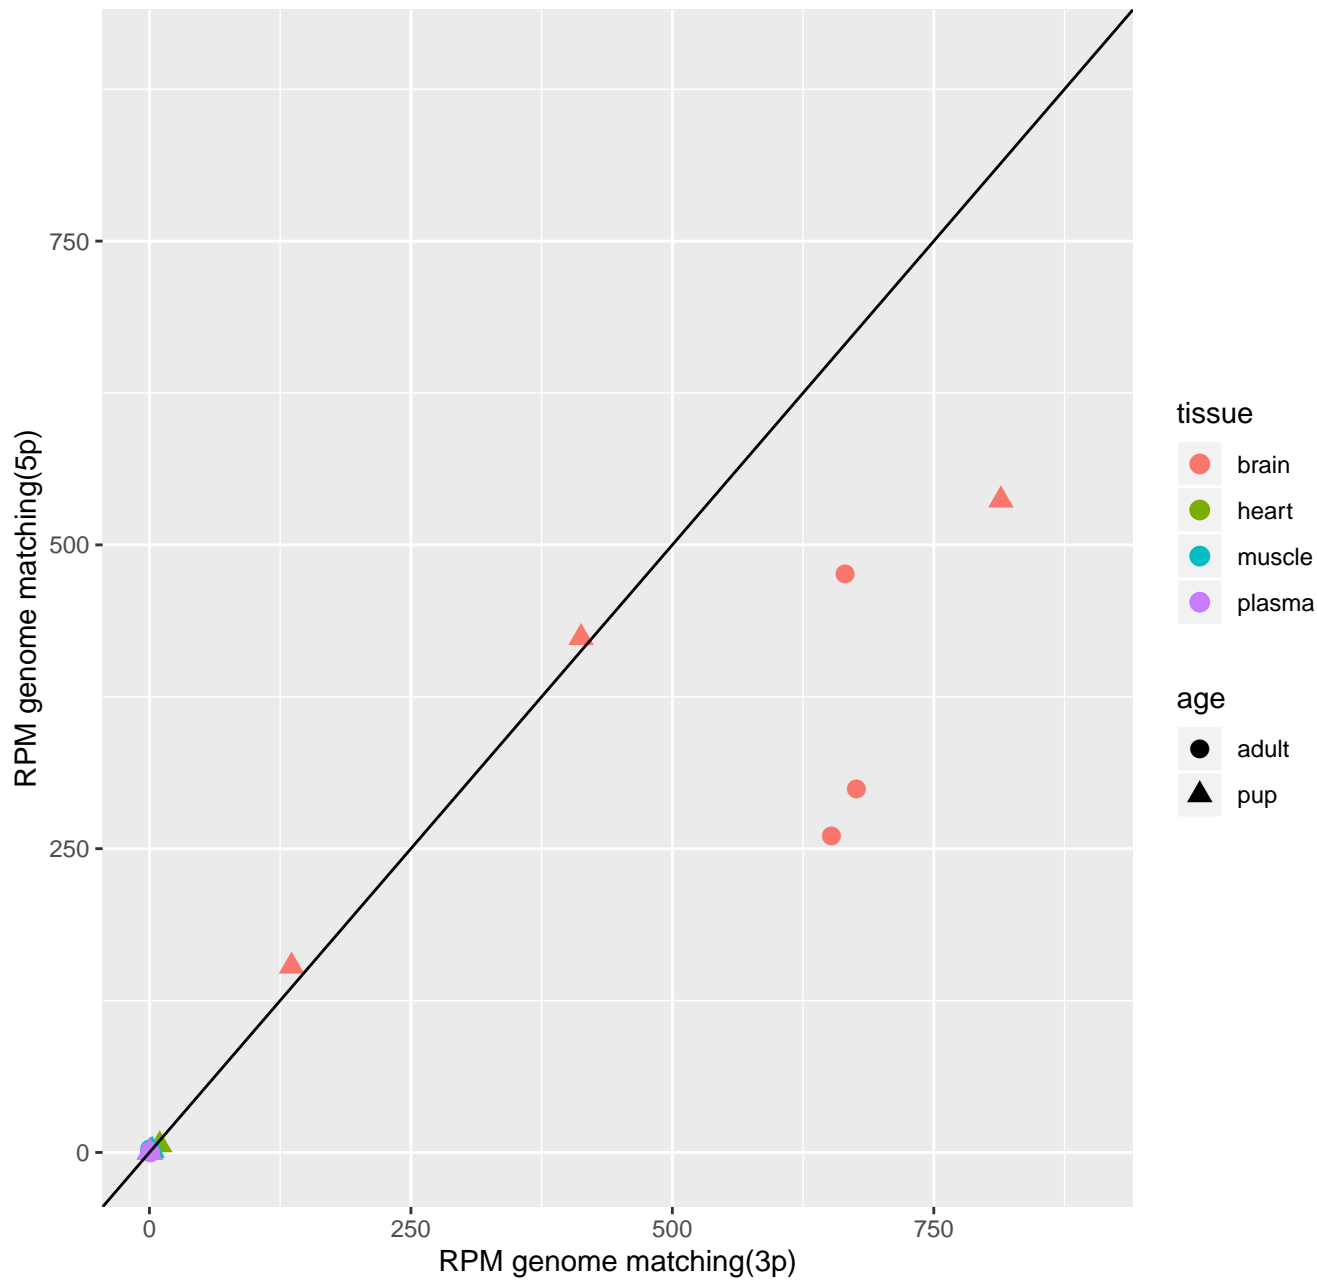

novel\_74

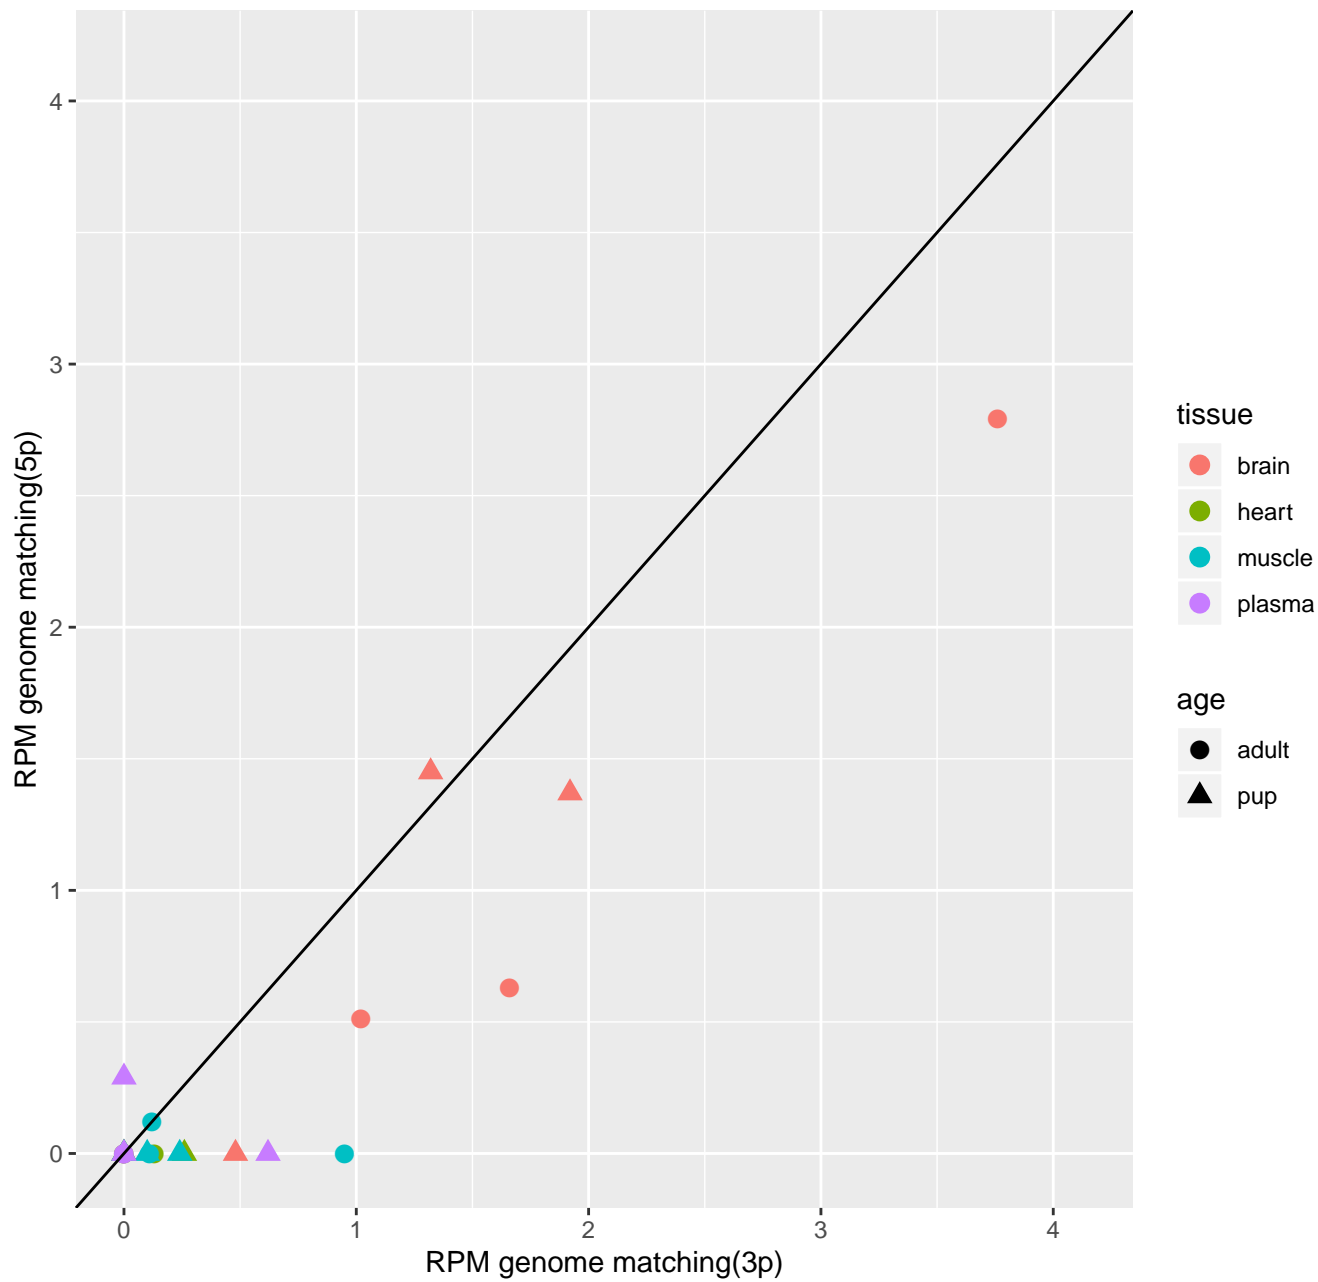



## lwe-miR-144\_loc1

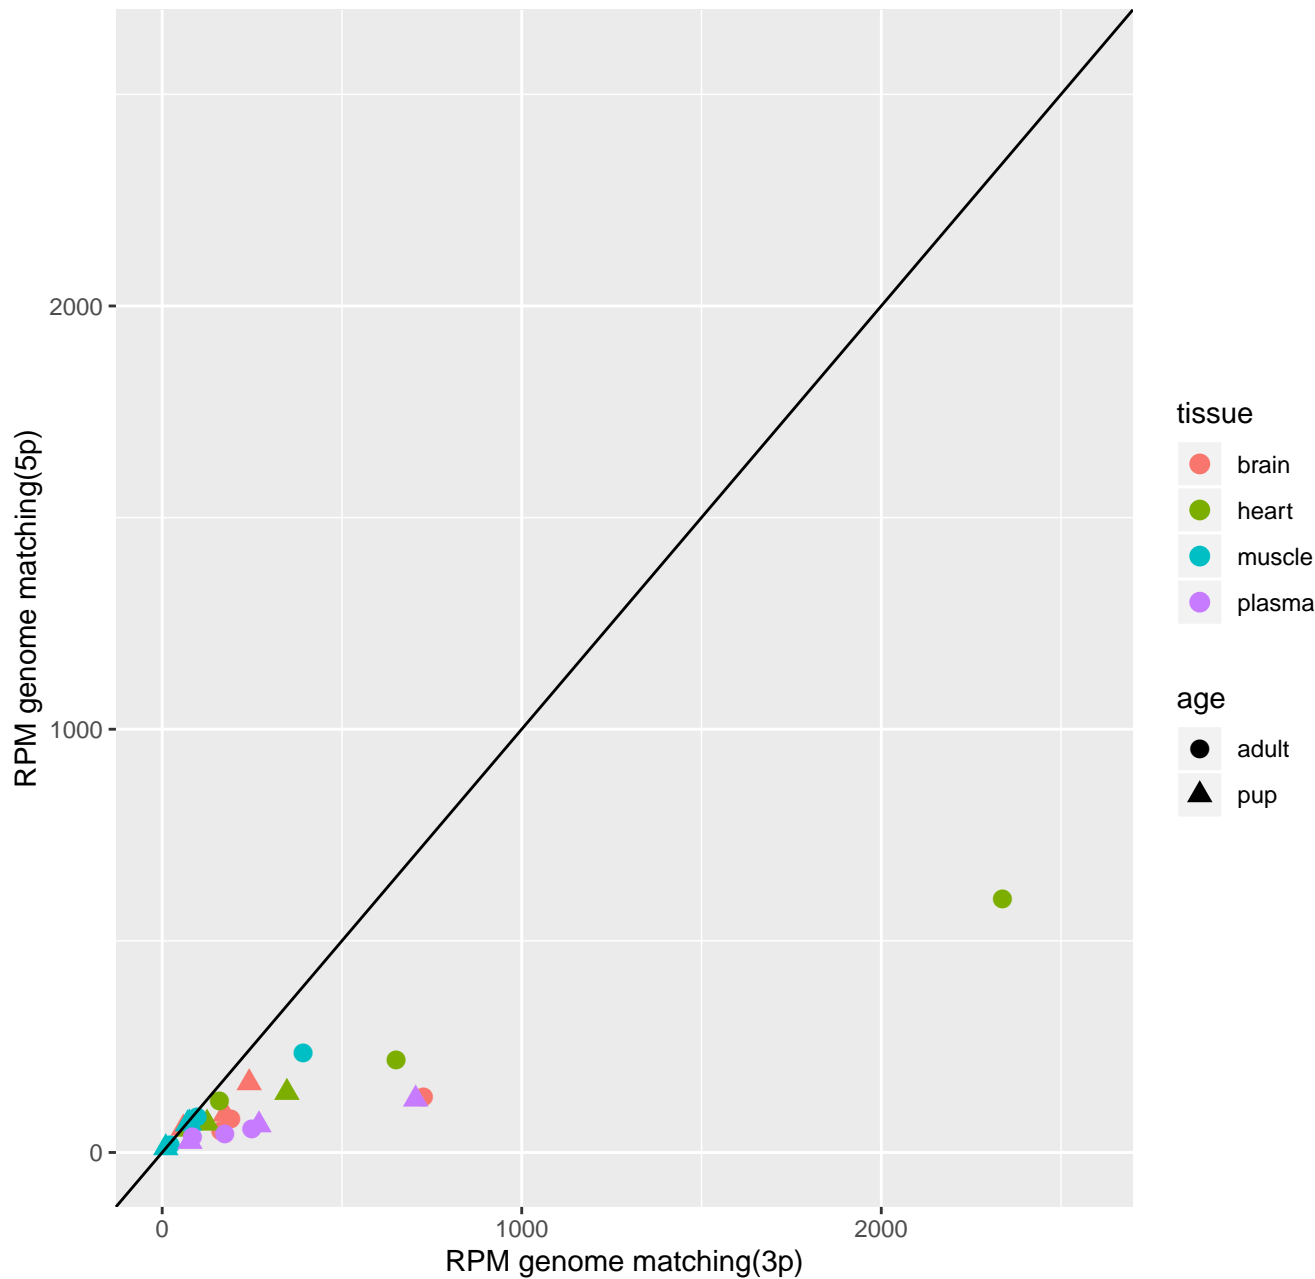

novel\_75

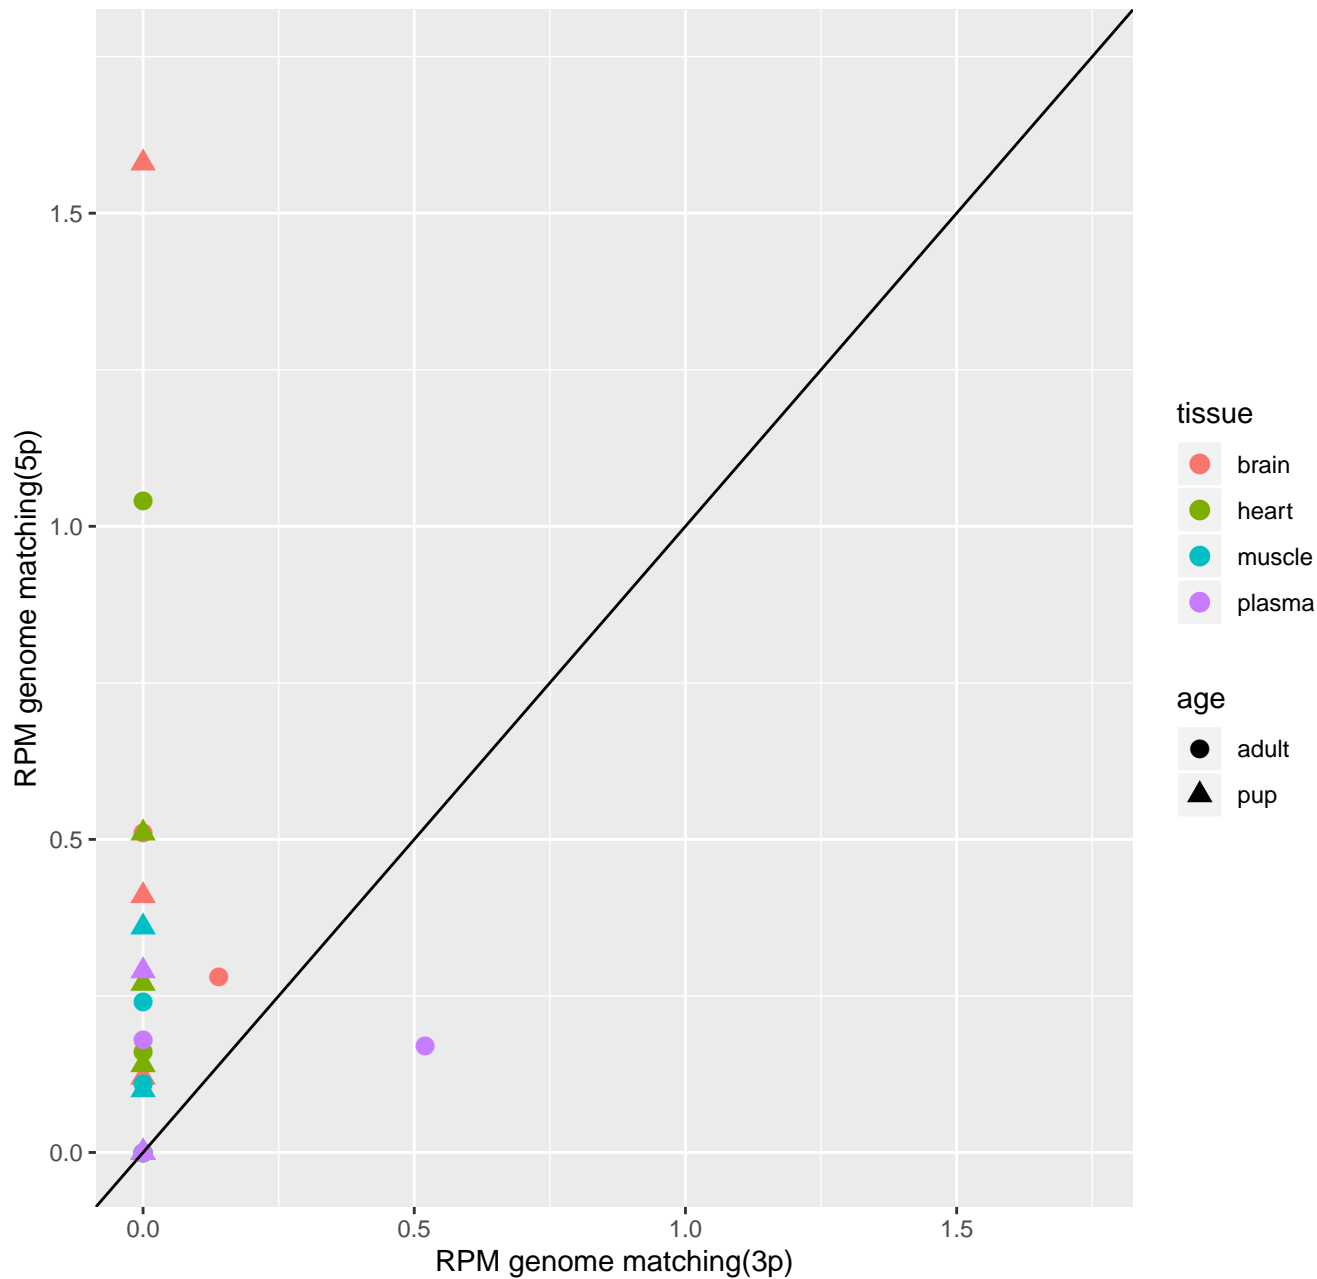

## lwe-miR-199a\_loc2

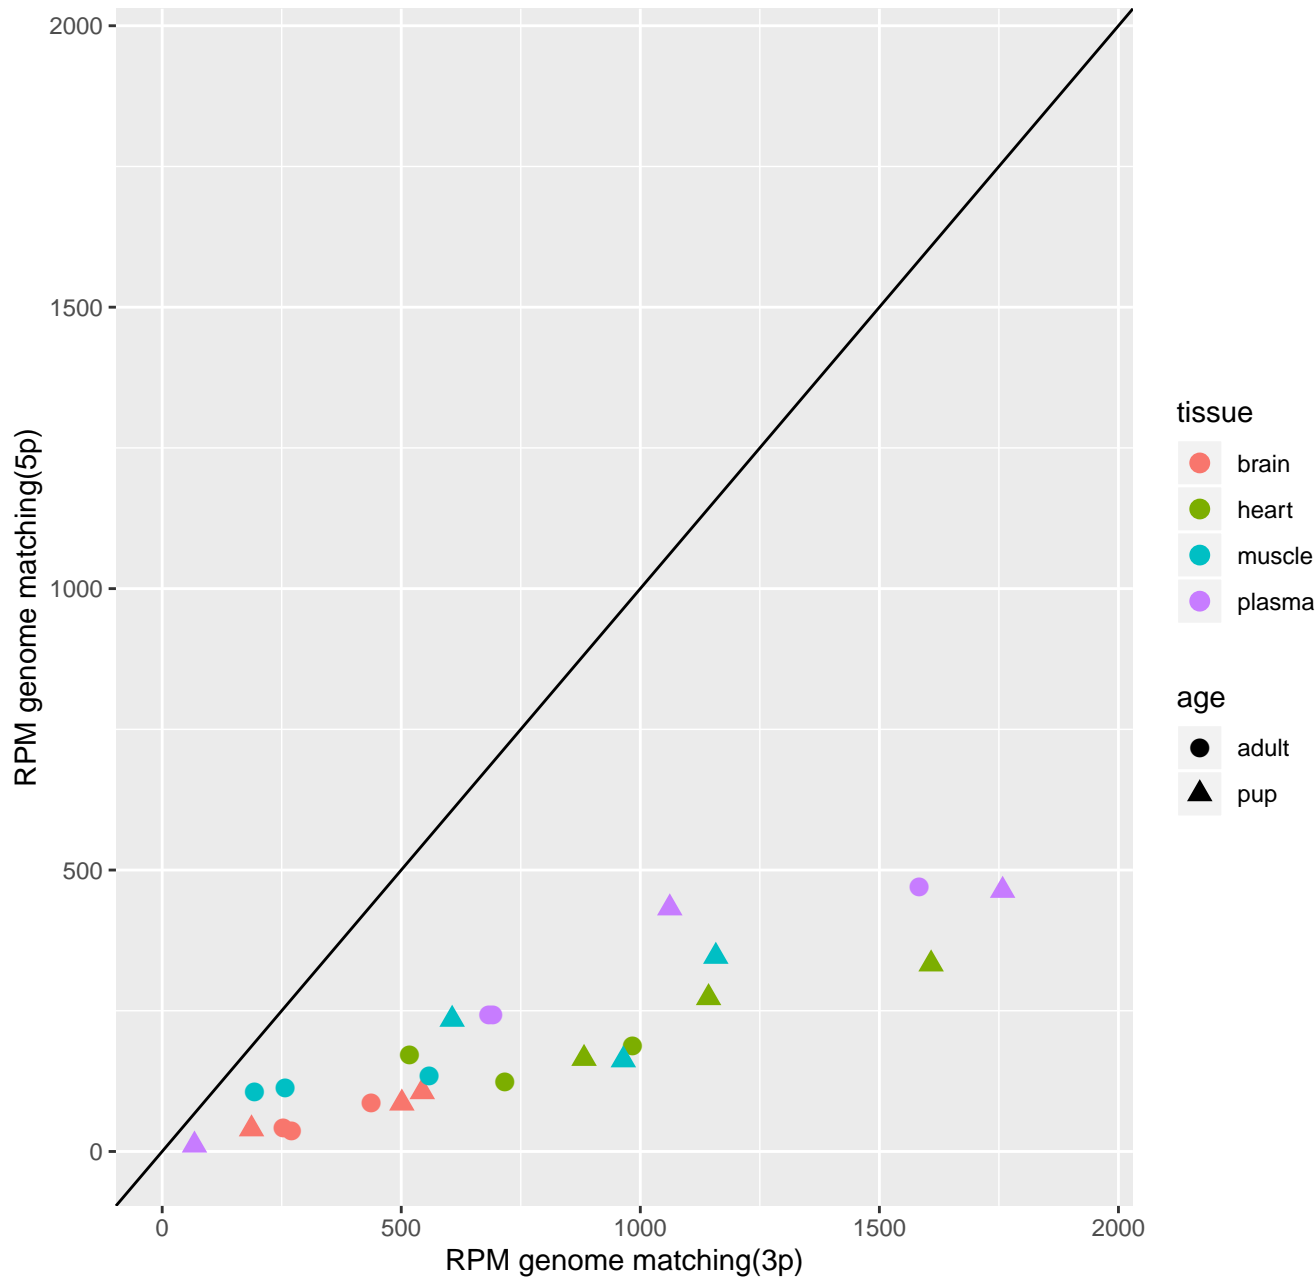

## lwe-miR-199a\_loc3

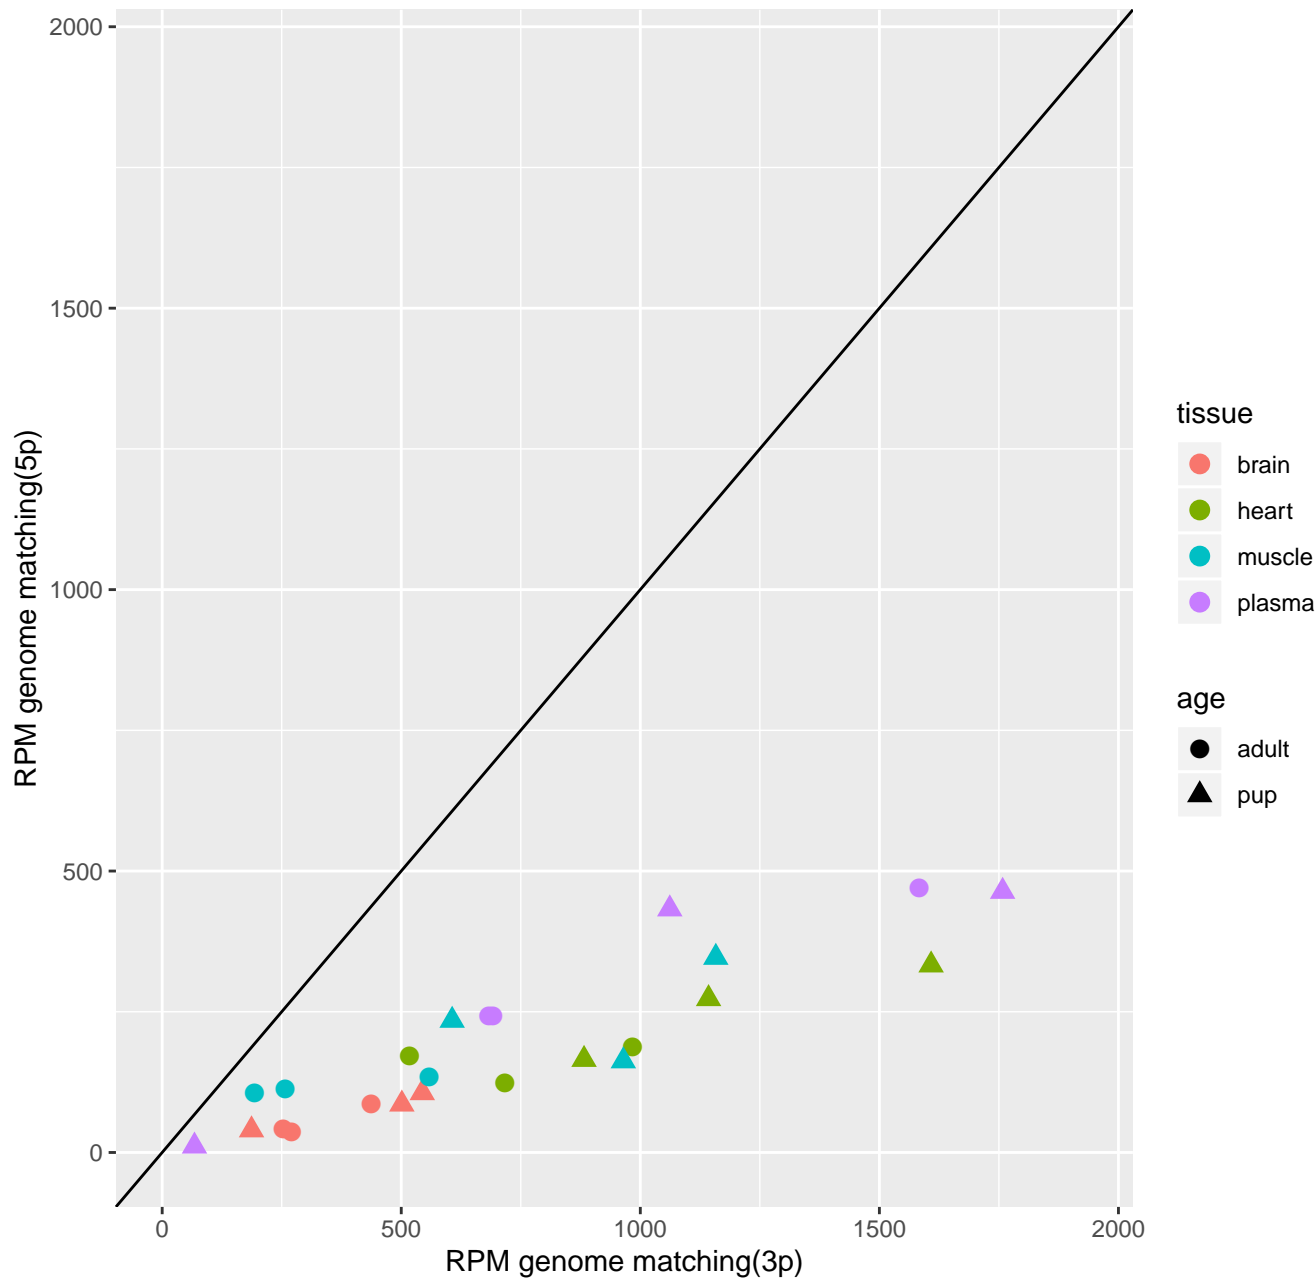

## lwe-miR-26a\_loc1

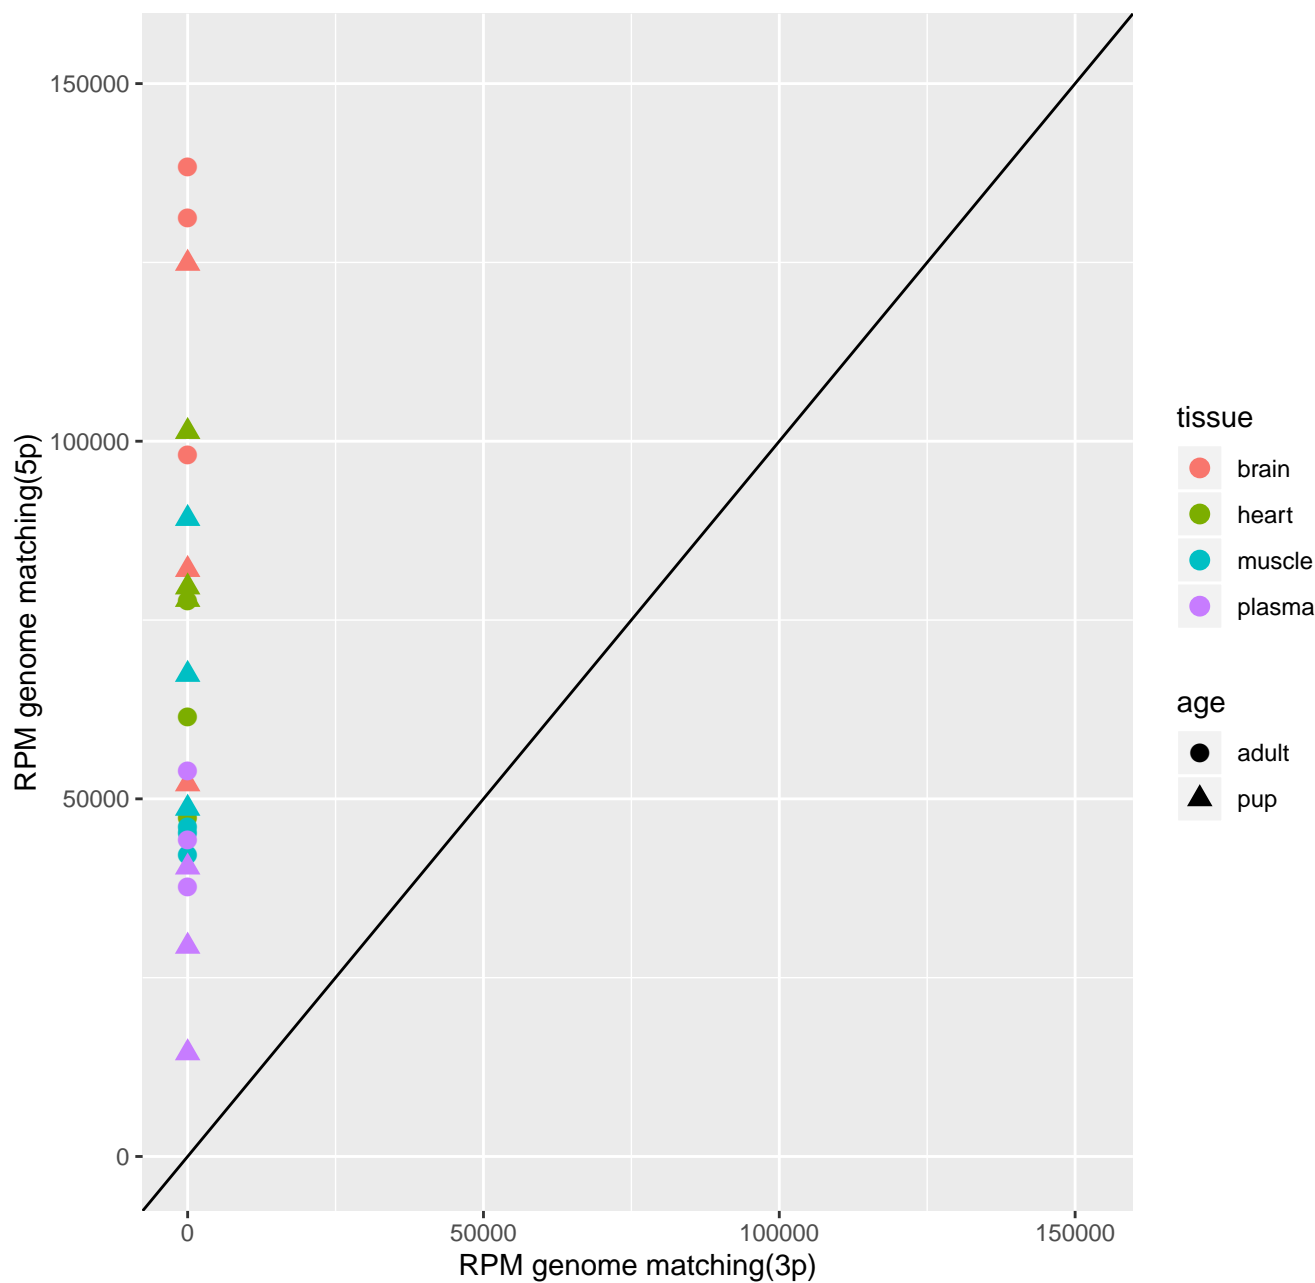

novel\_76

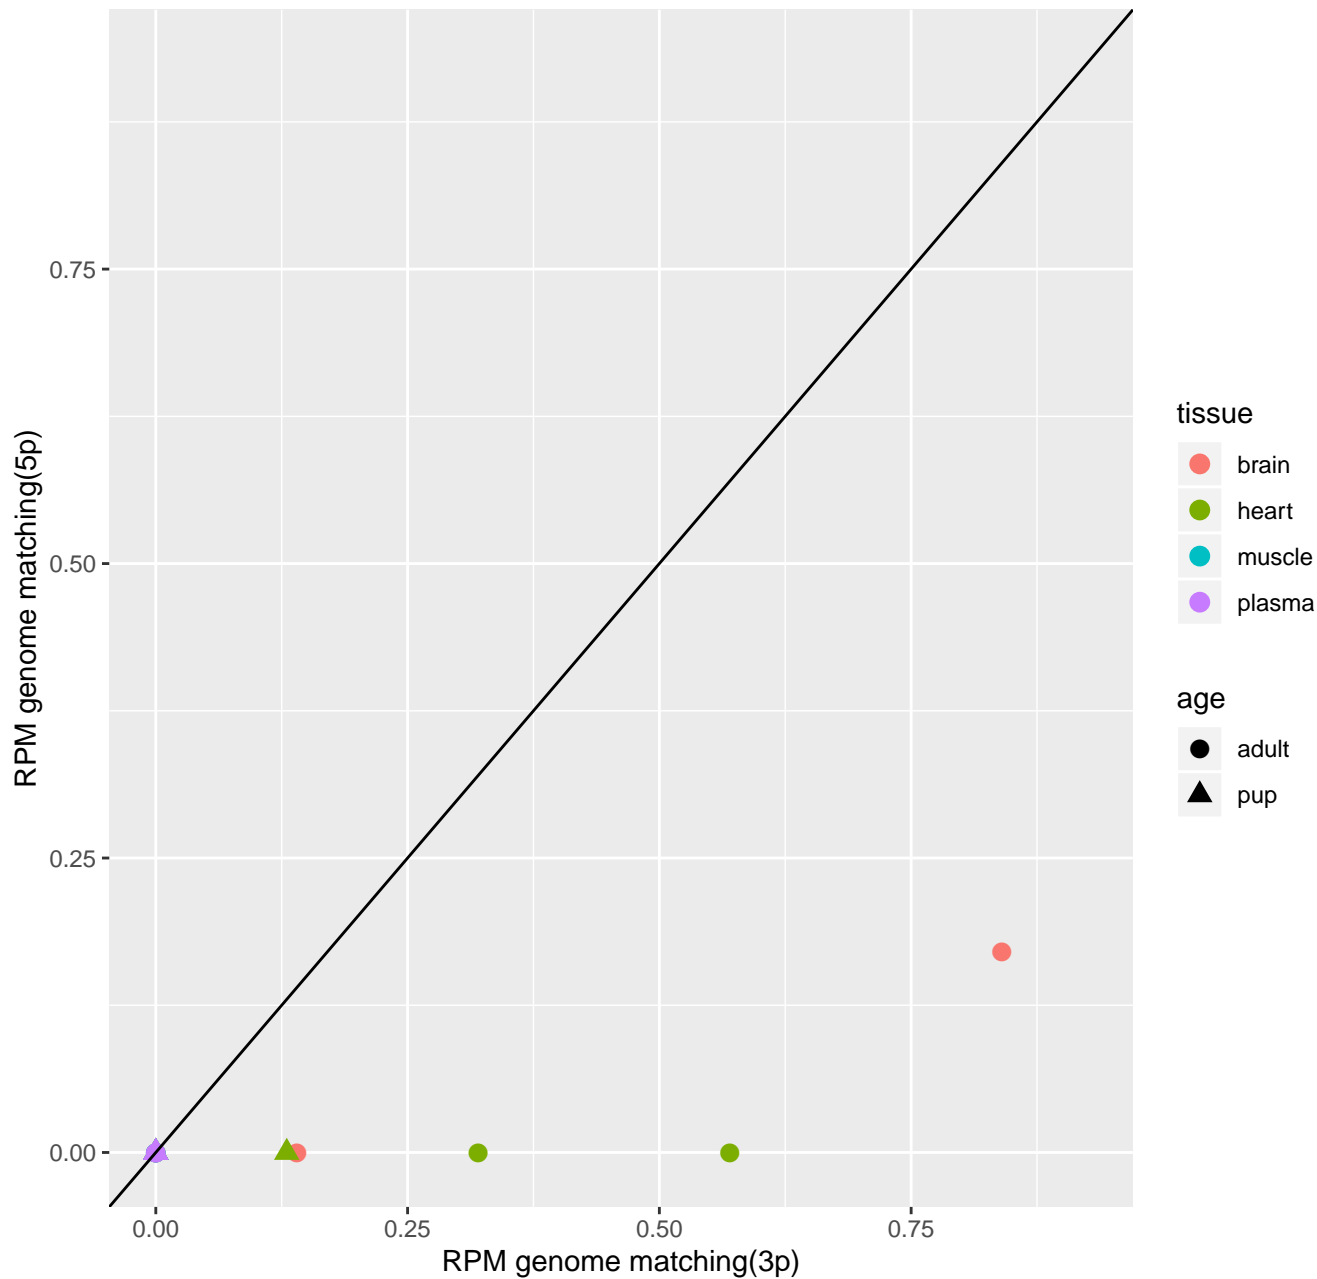

novel\_77

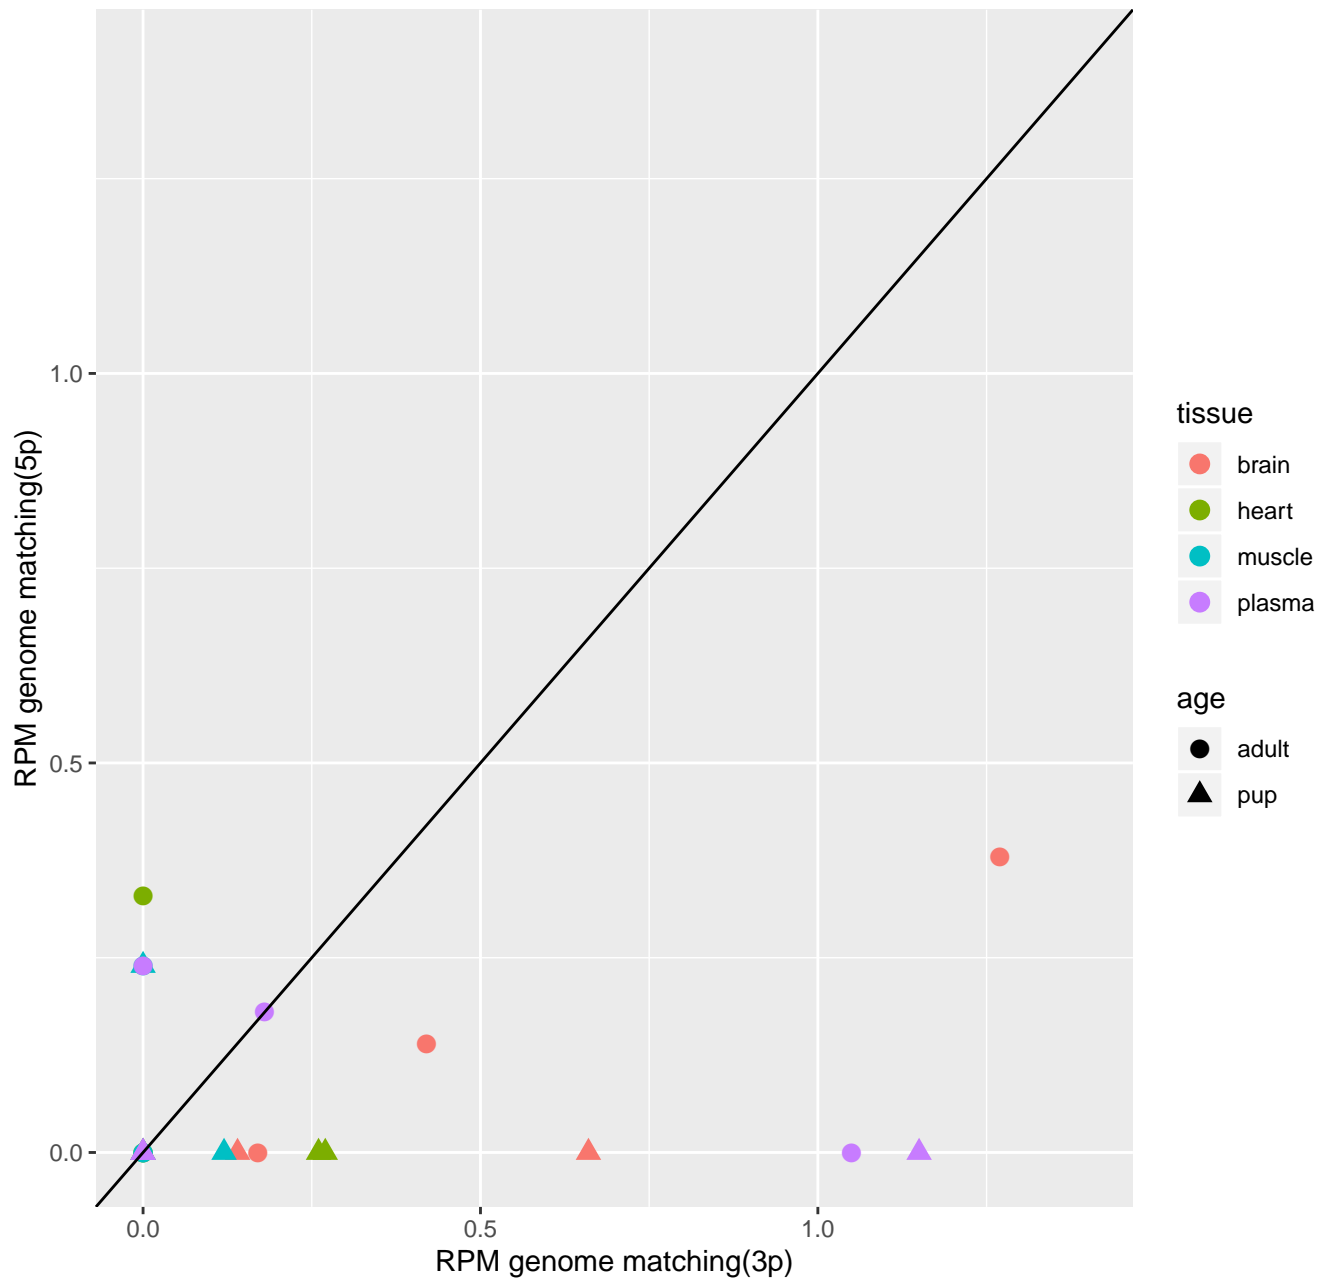

novel\_78

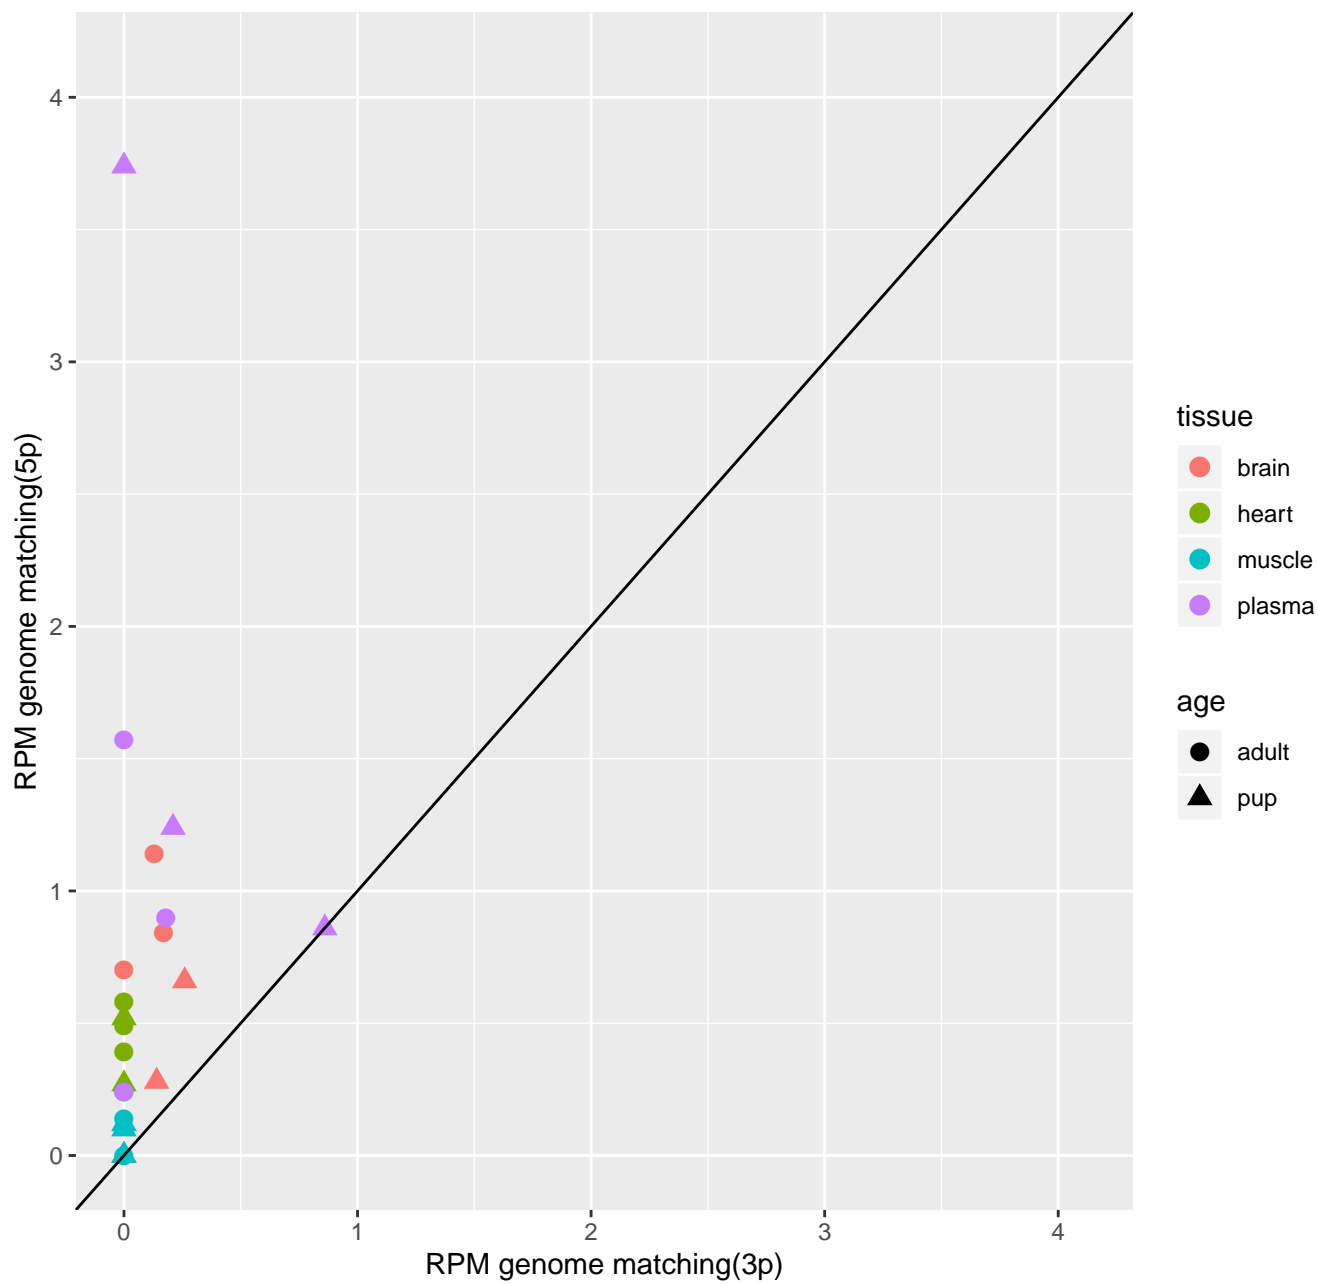



## lwe-miR-345\_loc1

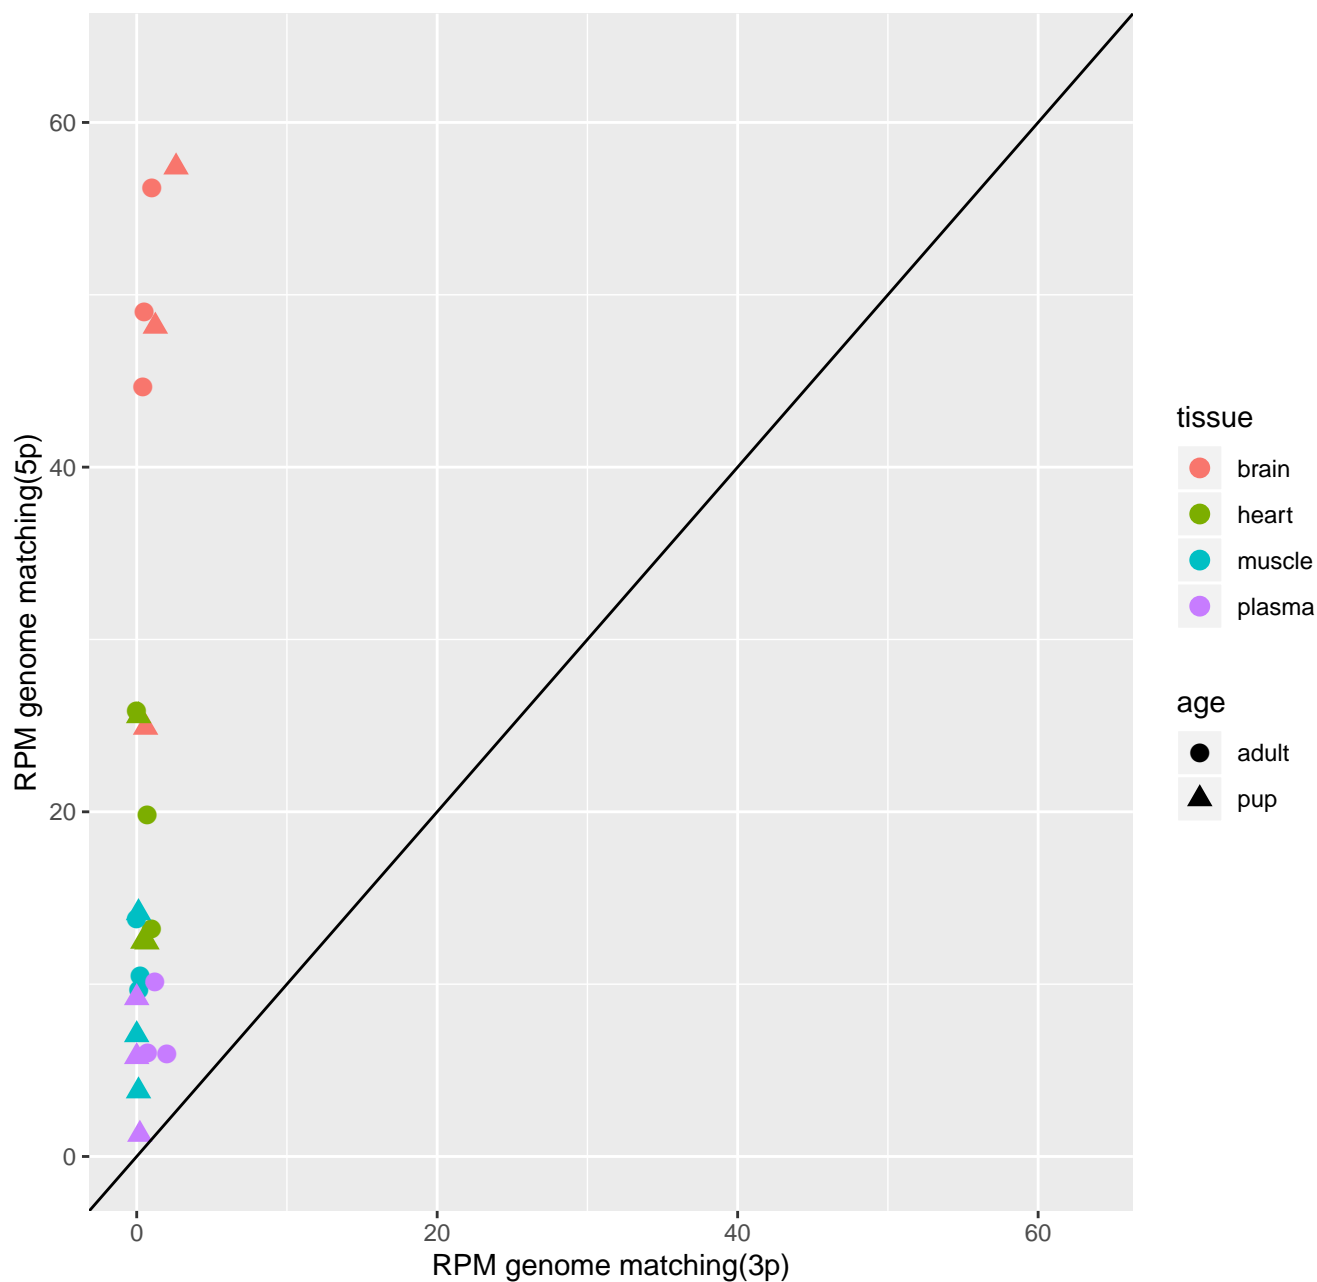

## novel\_79

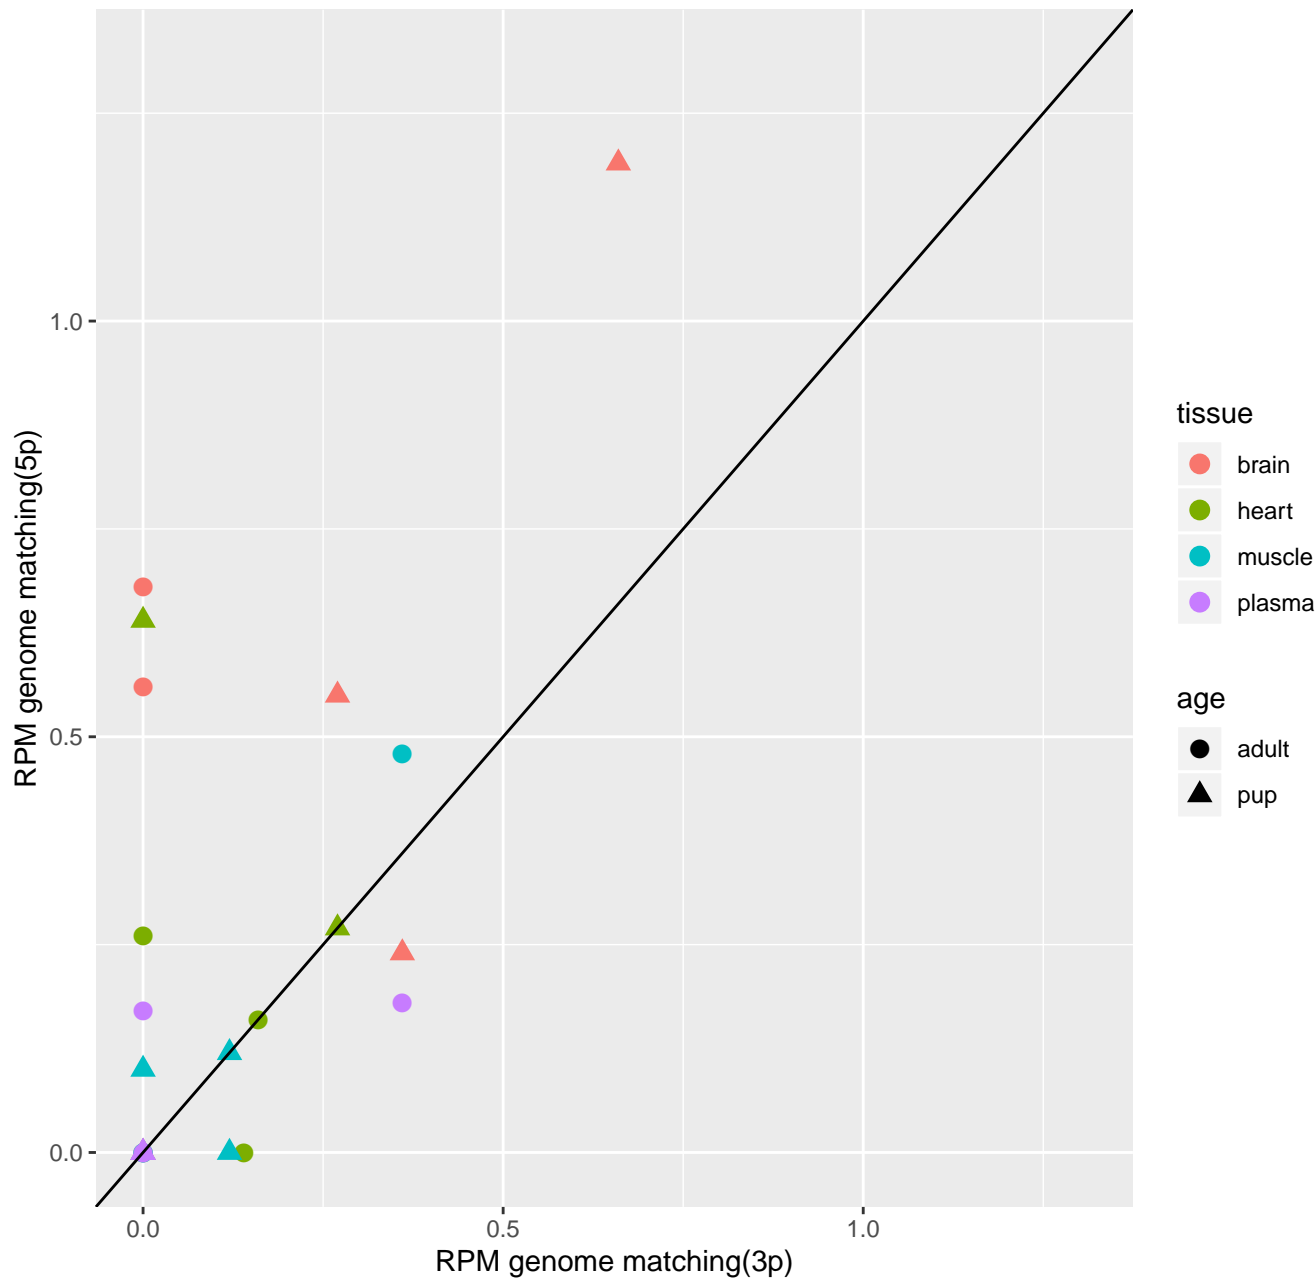

# lwe-miR-22\_loc1

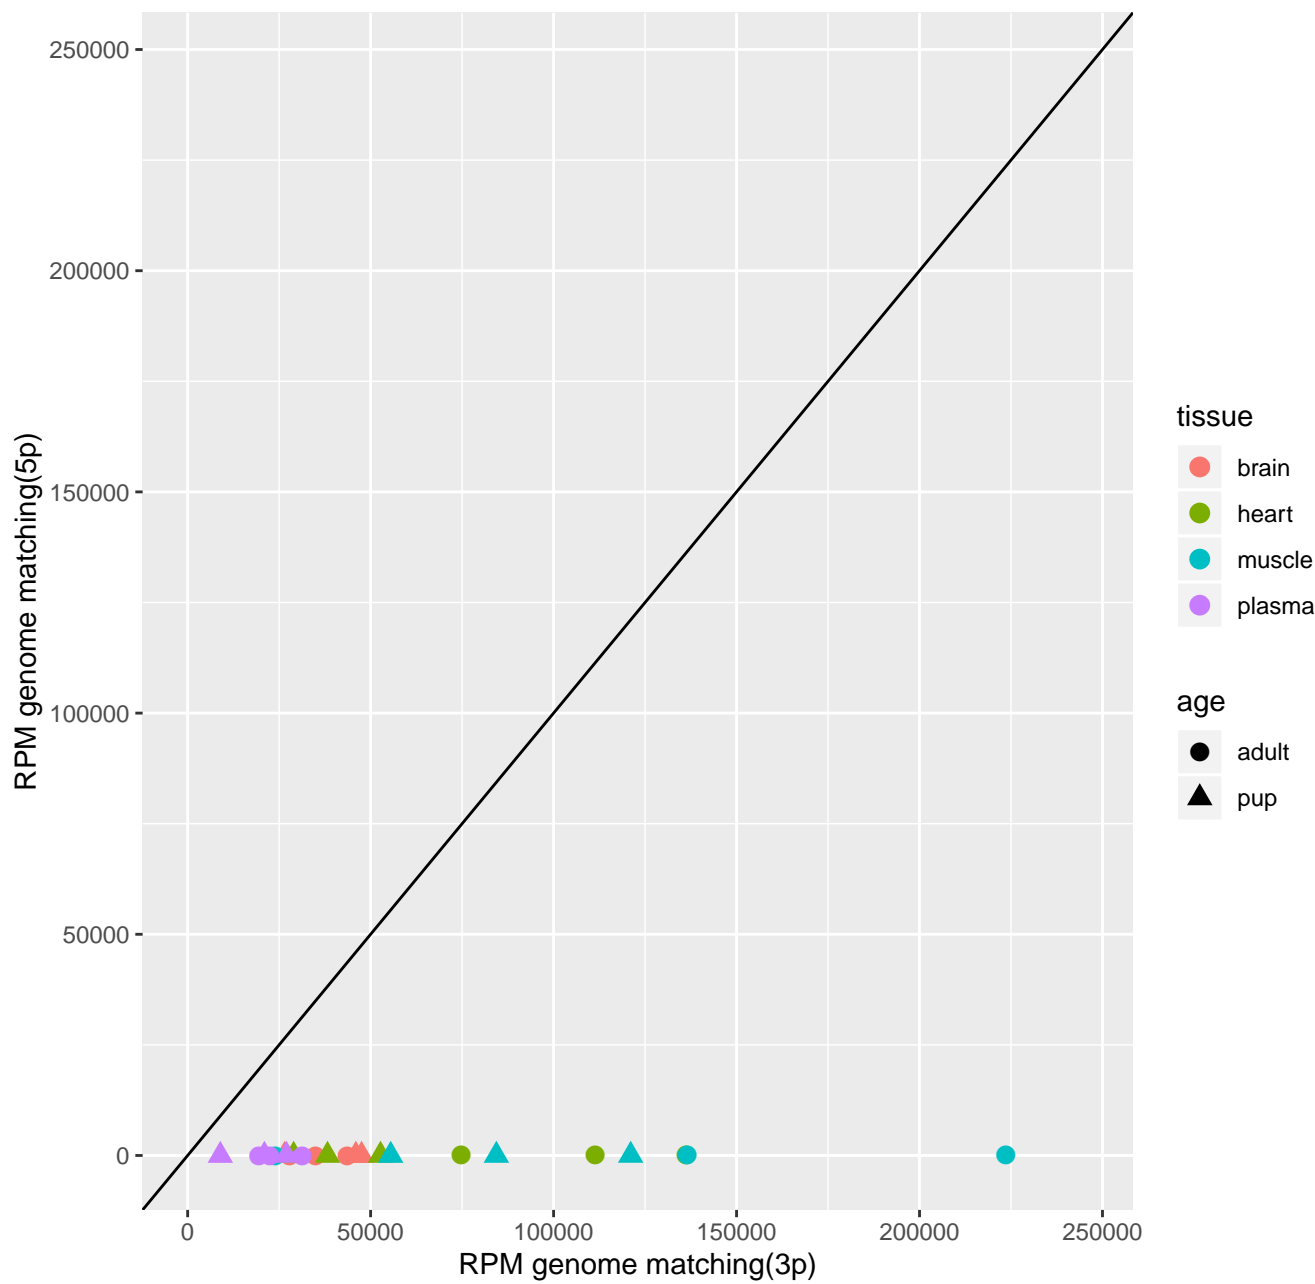

# lwe-miR-346\_loc1

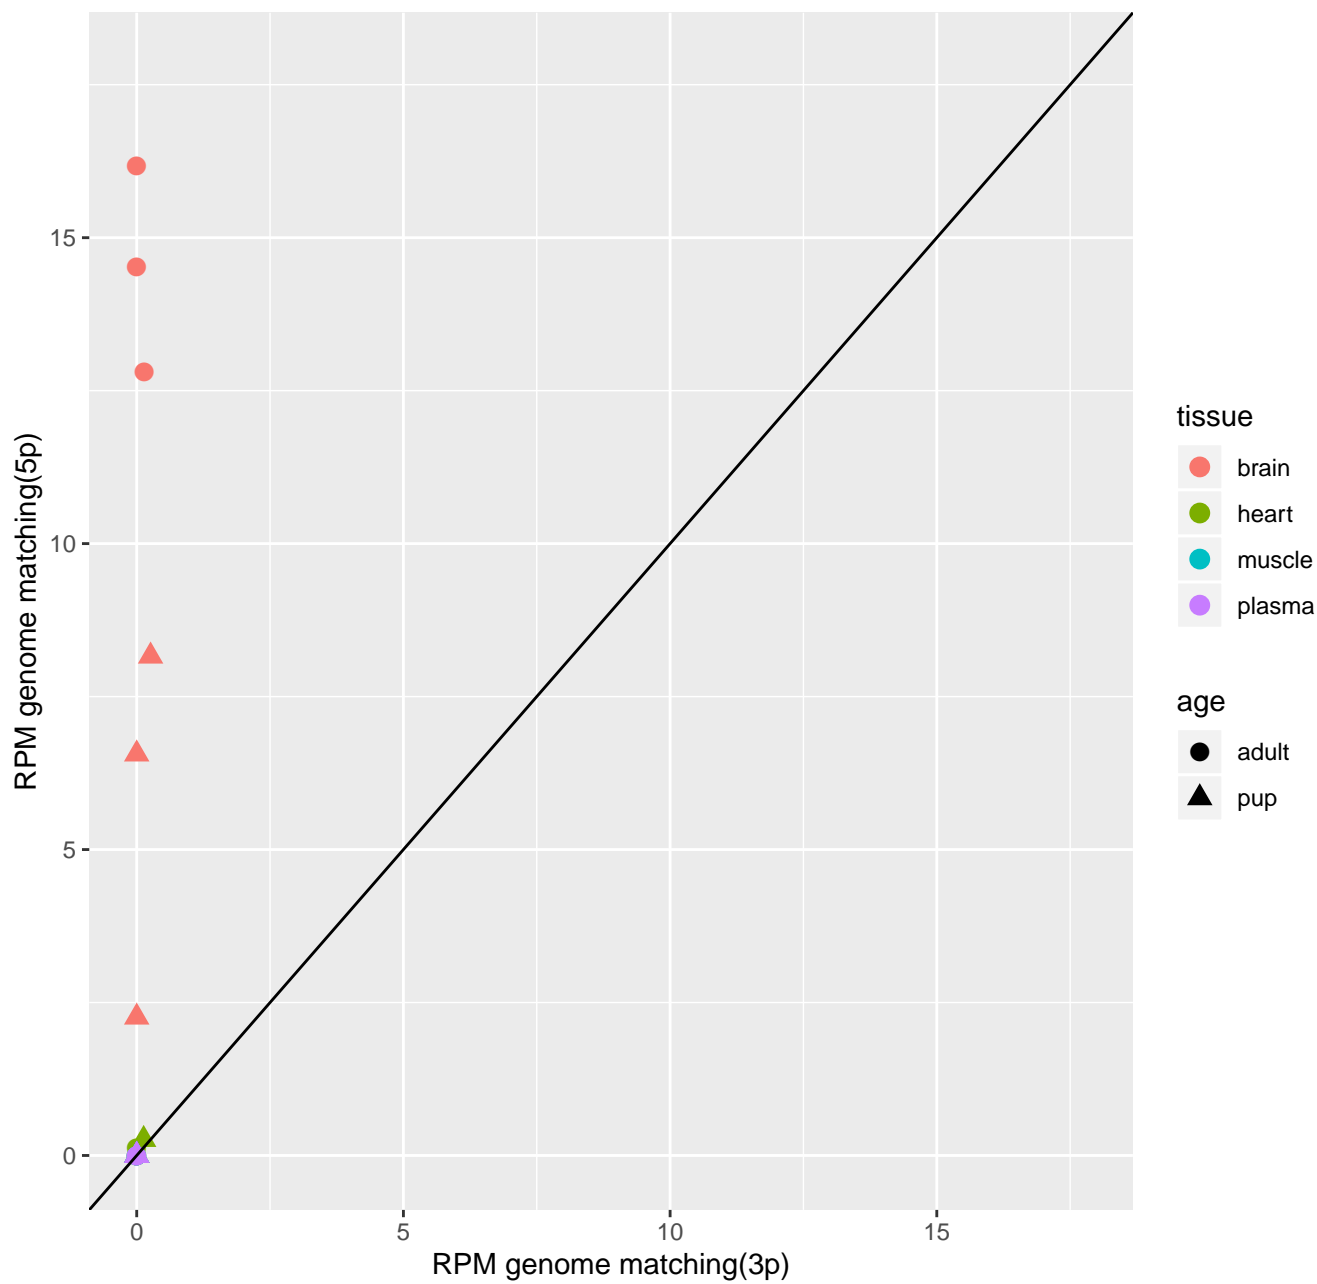

## novel\_80

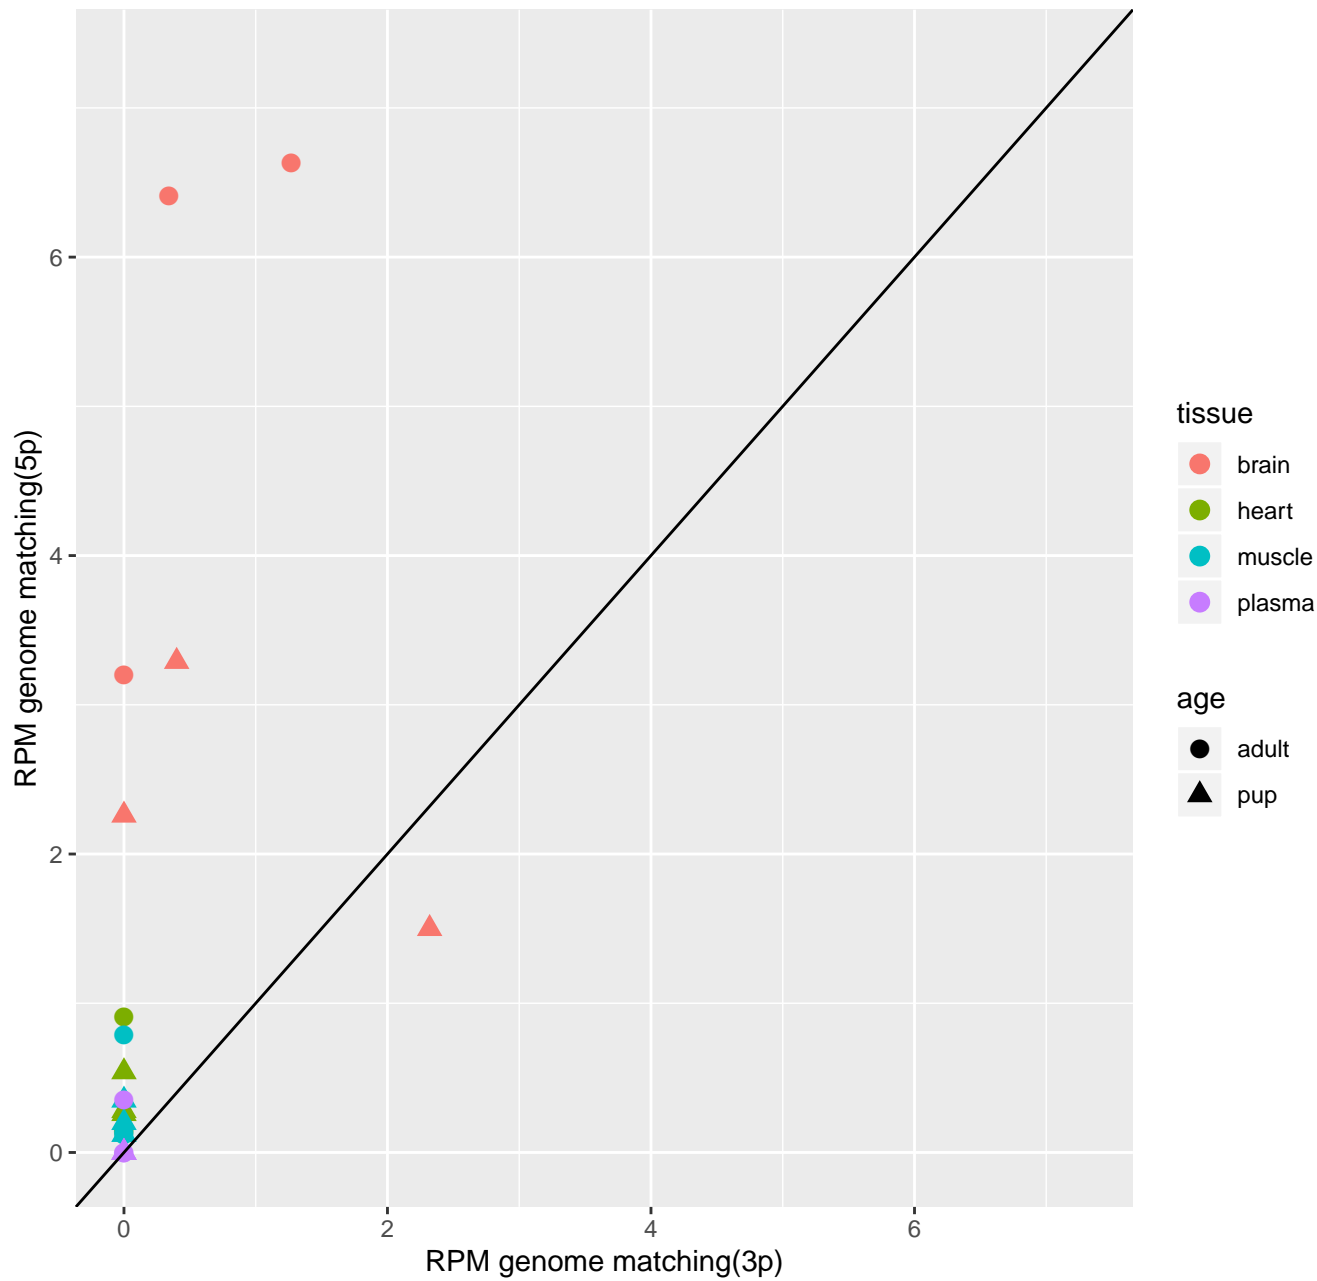



## lwe-miR-574\_loc1

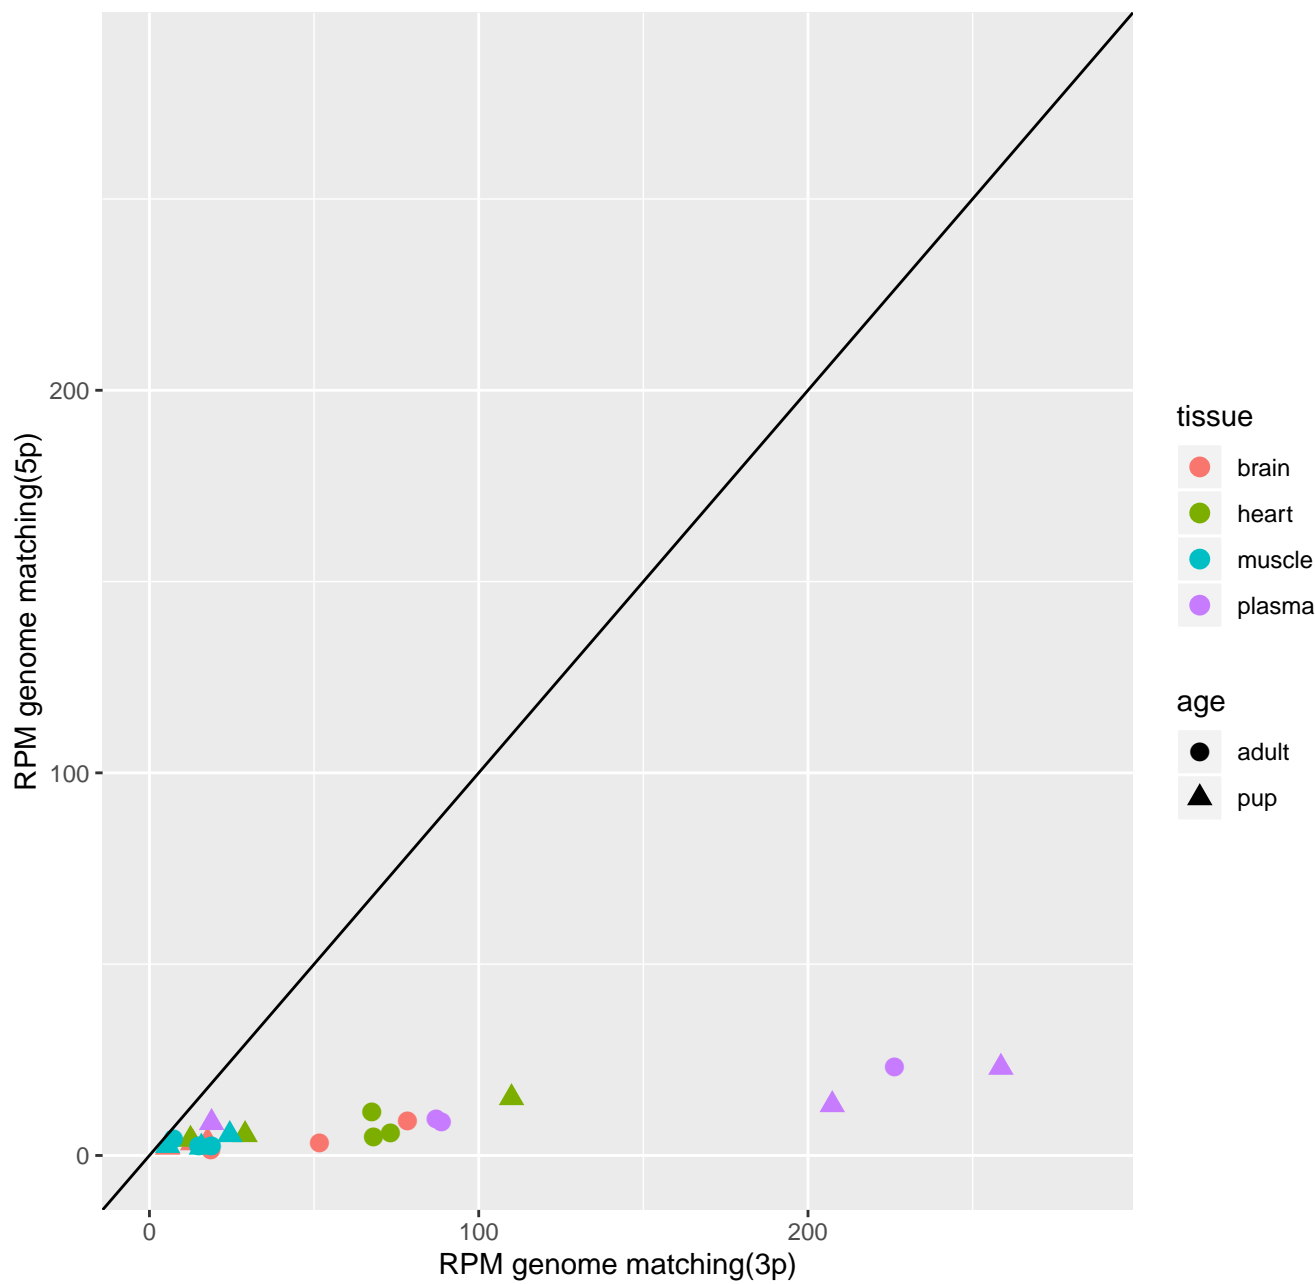

## lwe-miR-210\_loc1

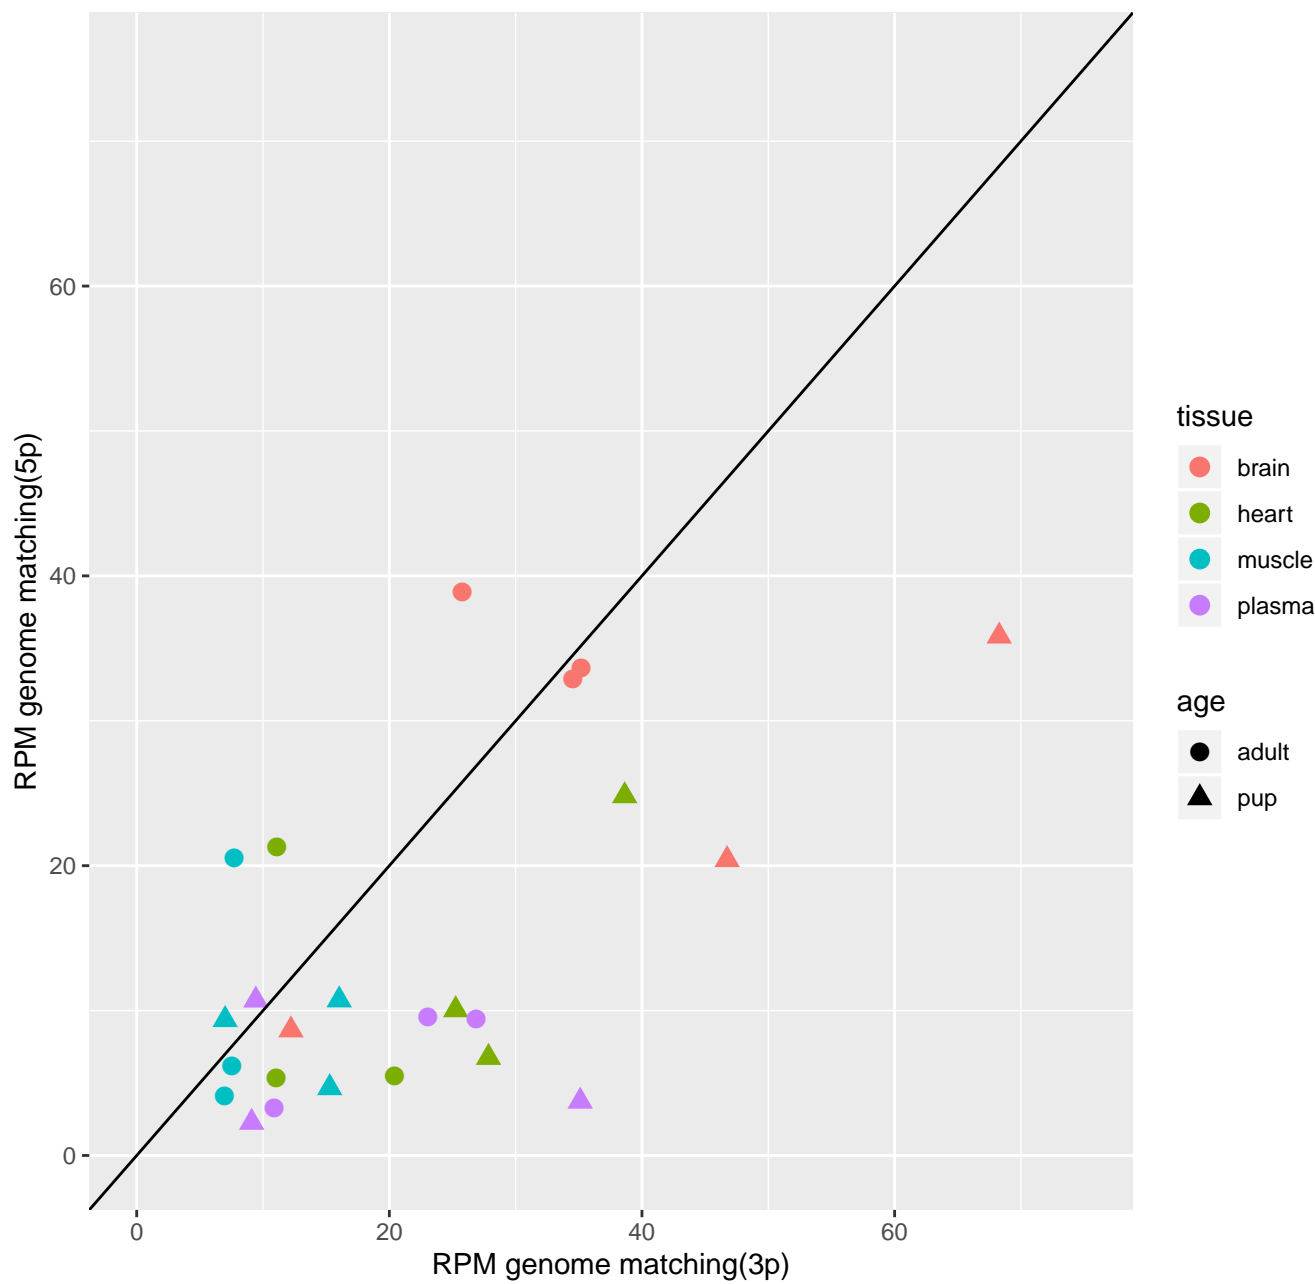



## lwe-miR-331\_loc1

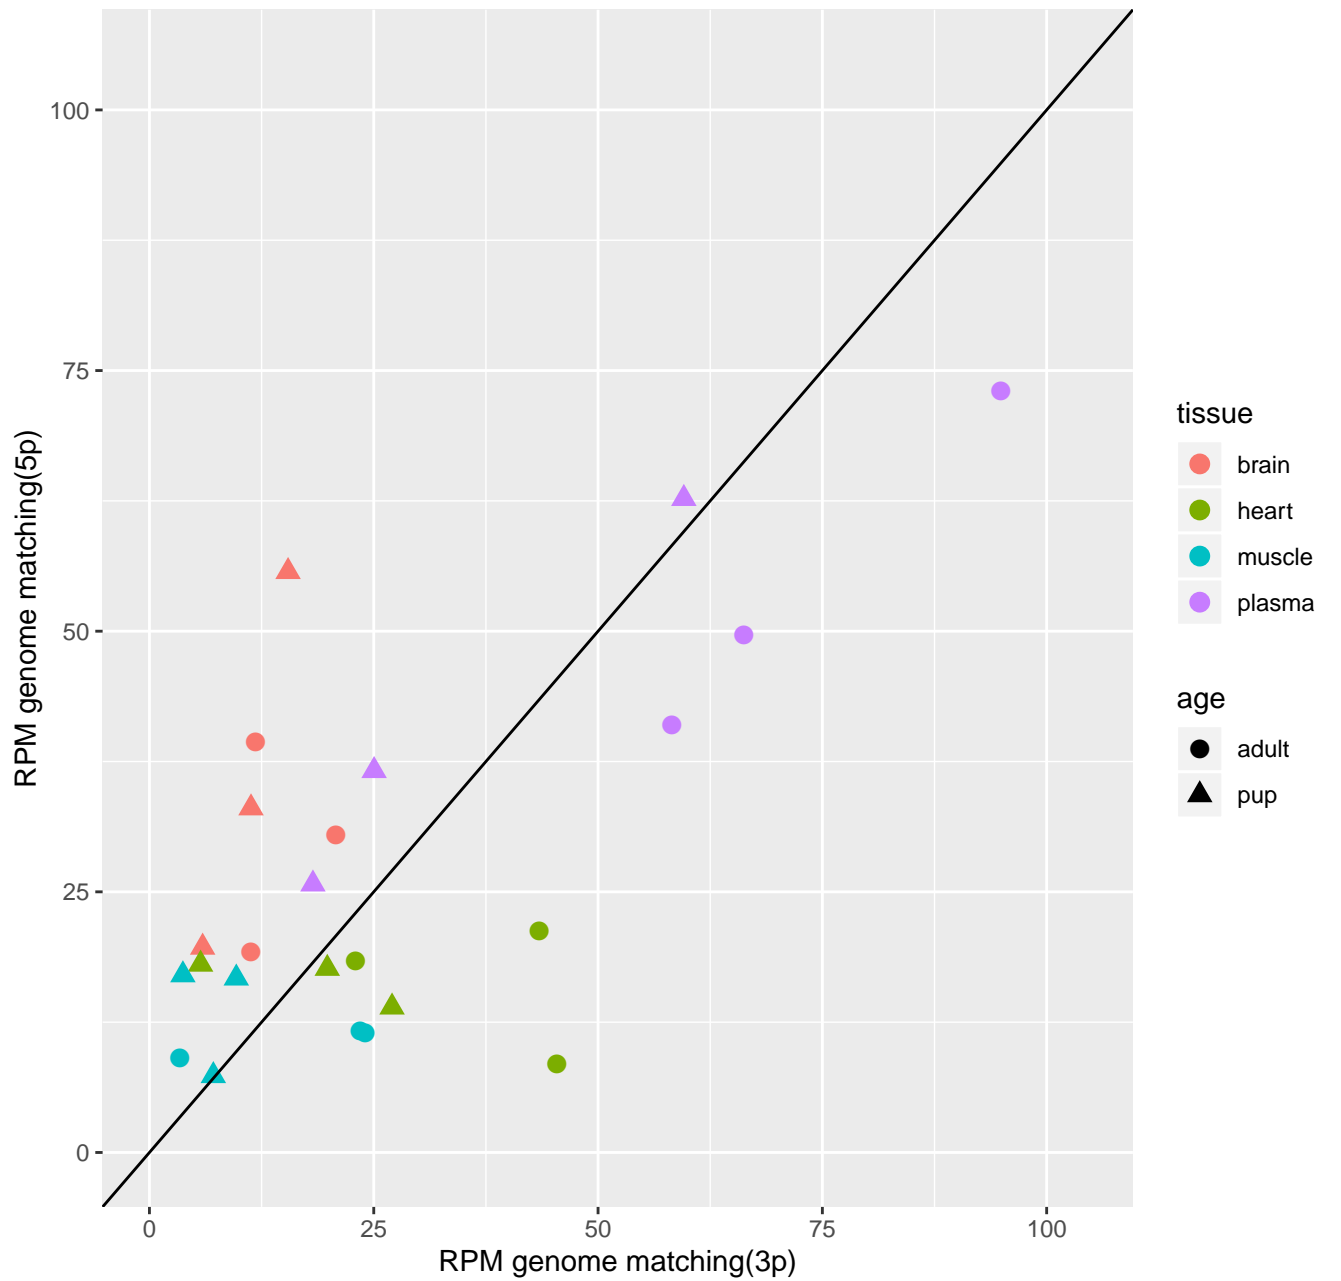



## lwe-miR-190a\_loc1

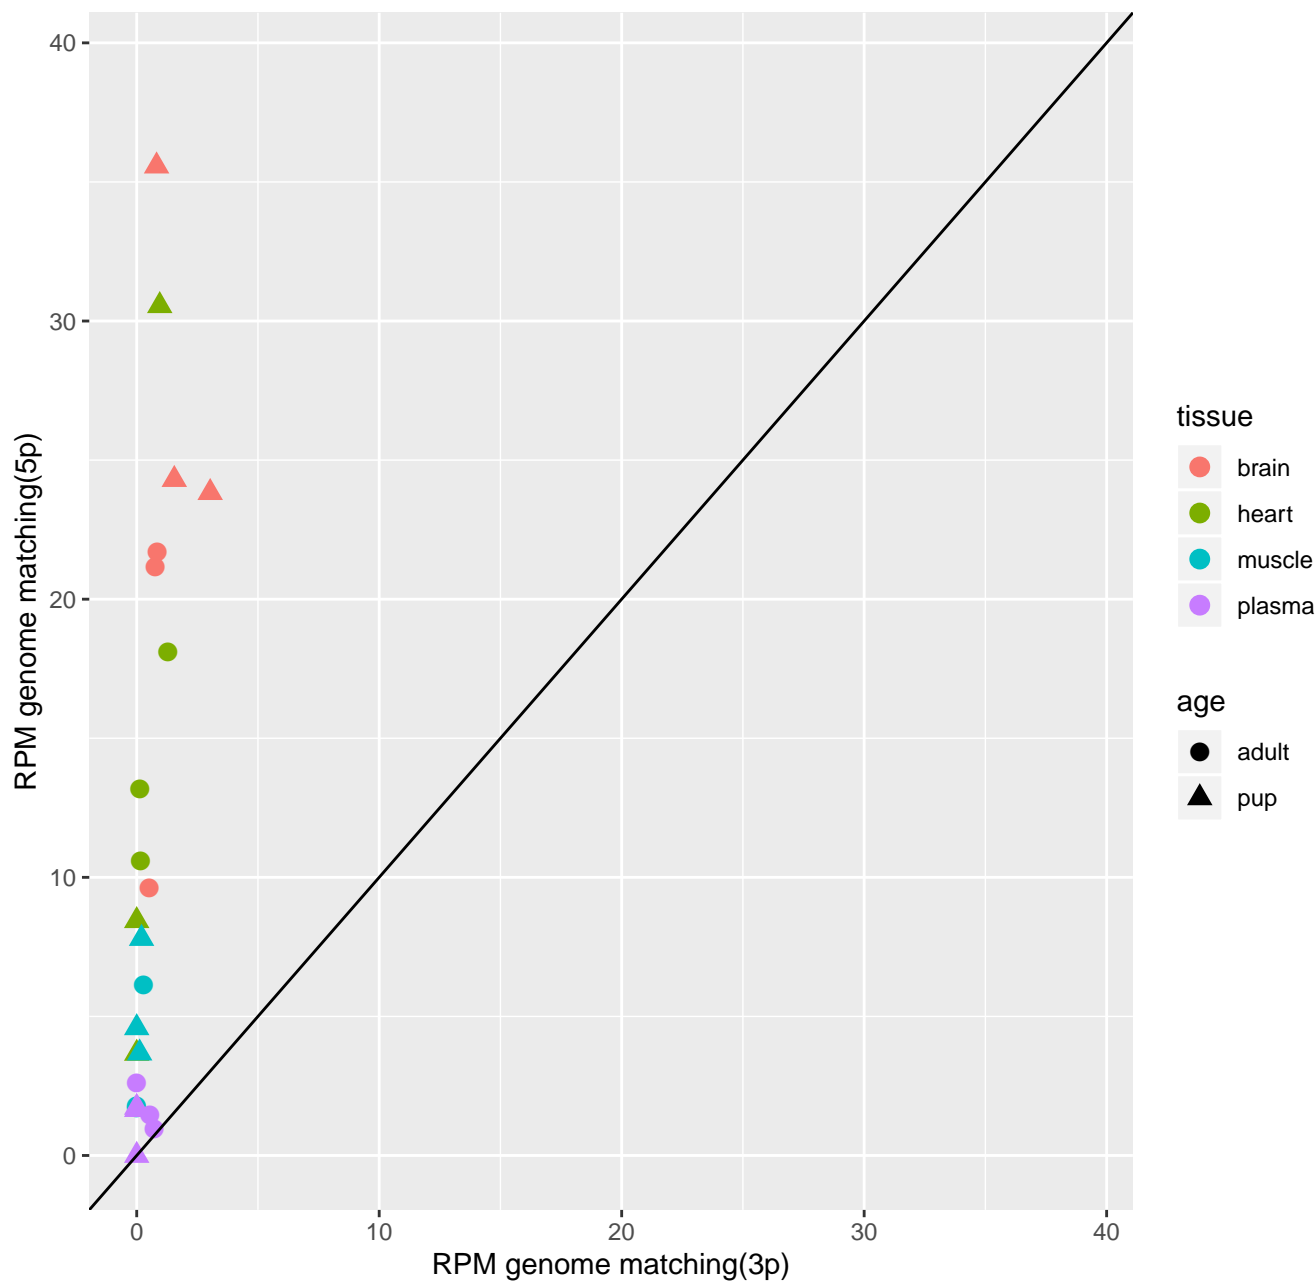

## lwe-miR-15b\_loc1

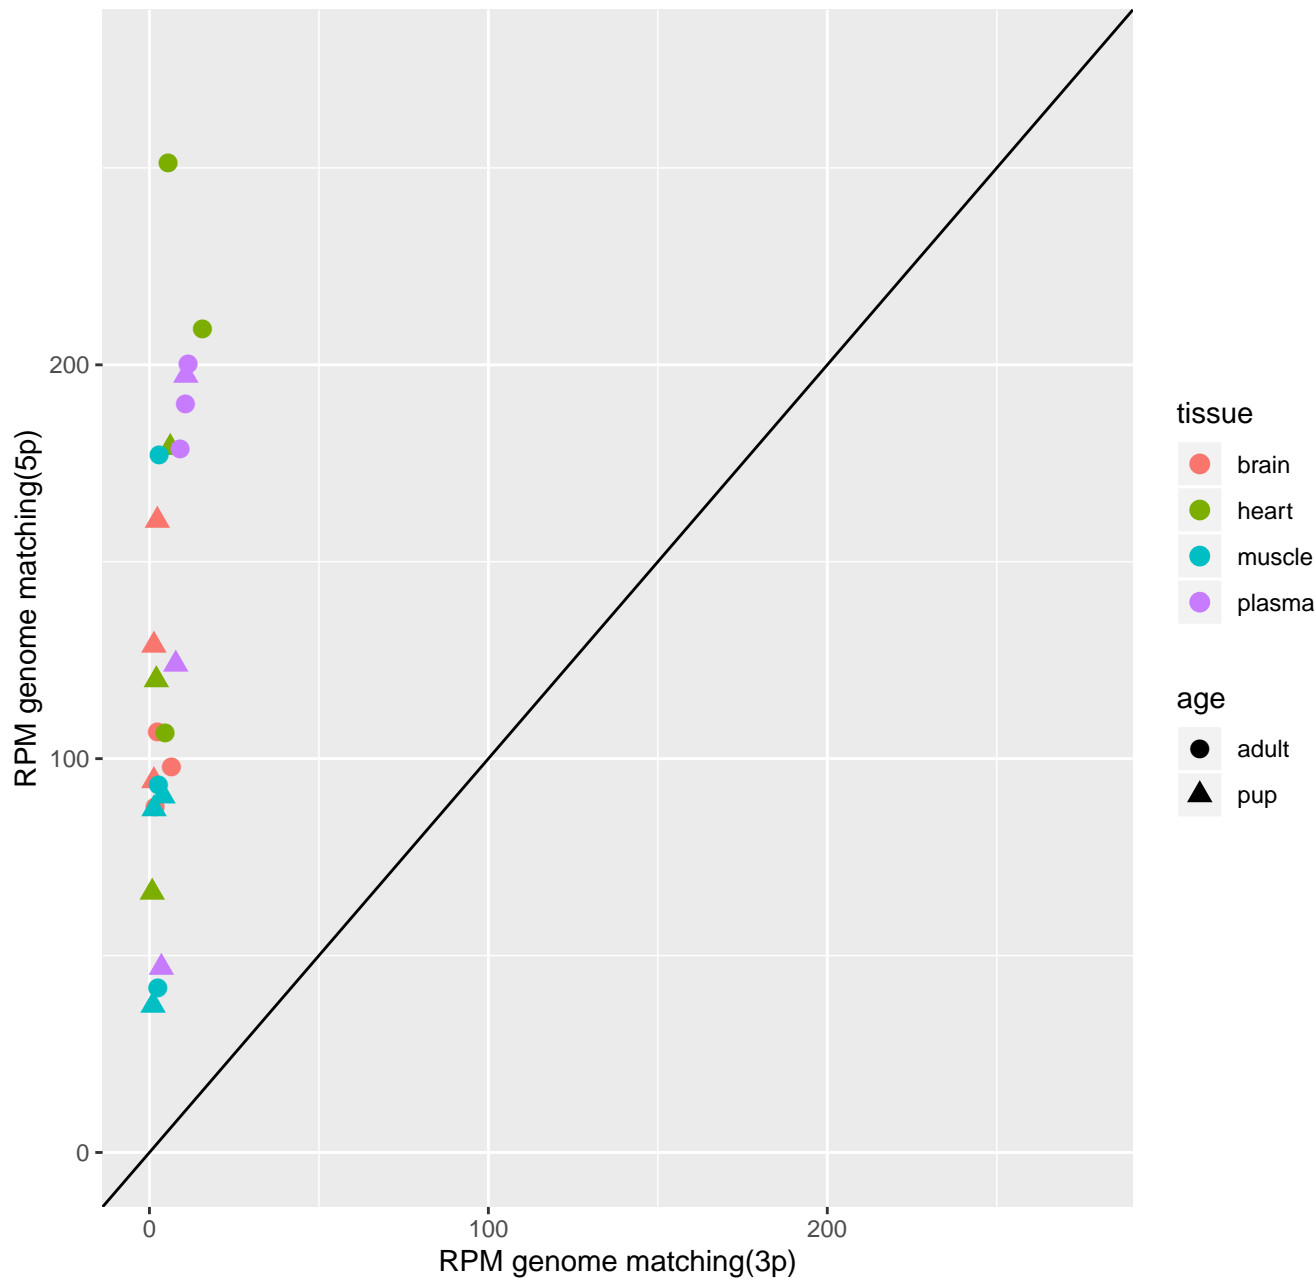

## lwe-miR-16\_loc2

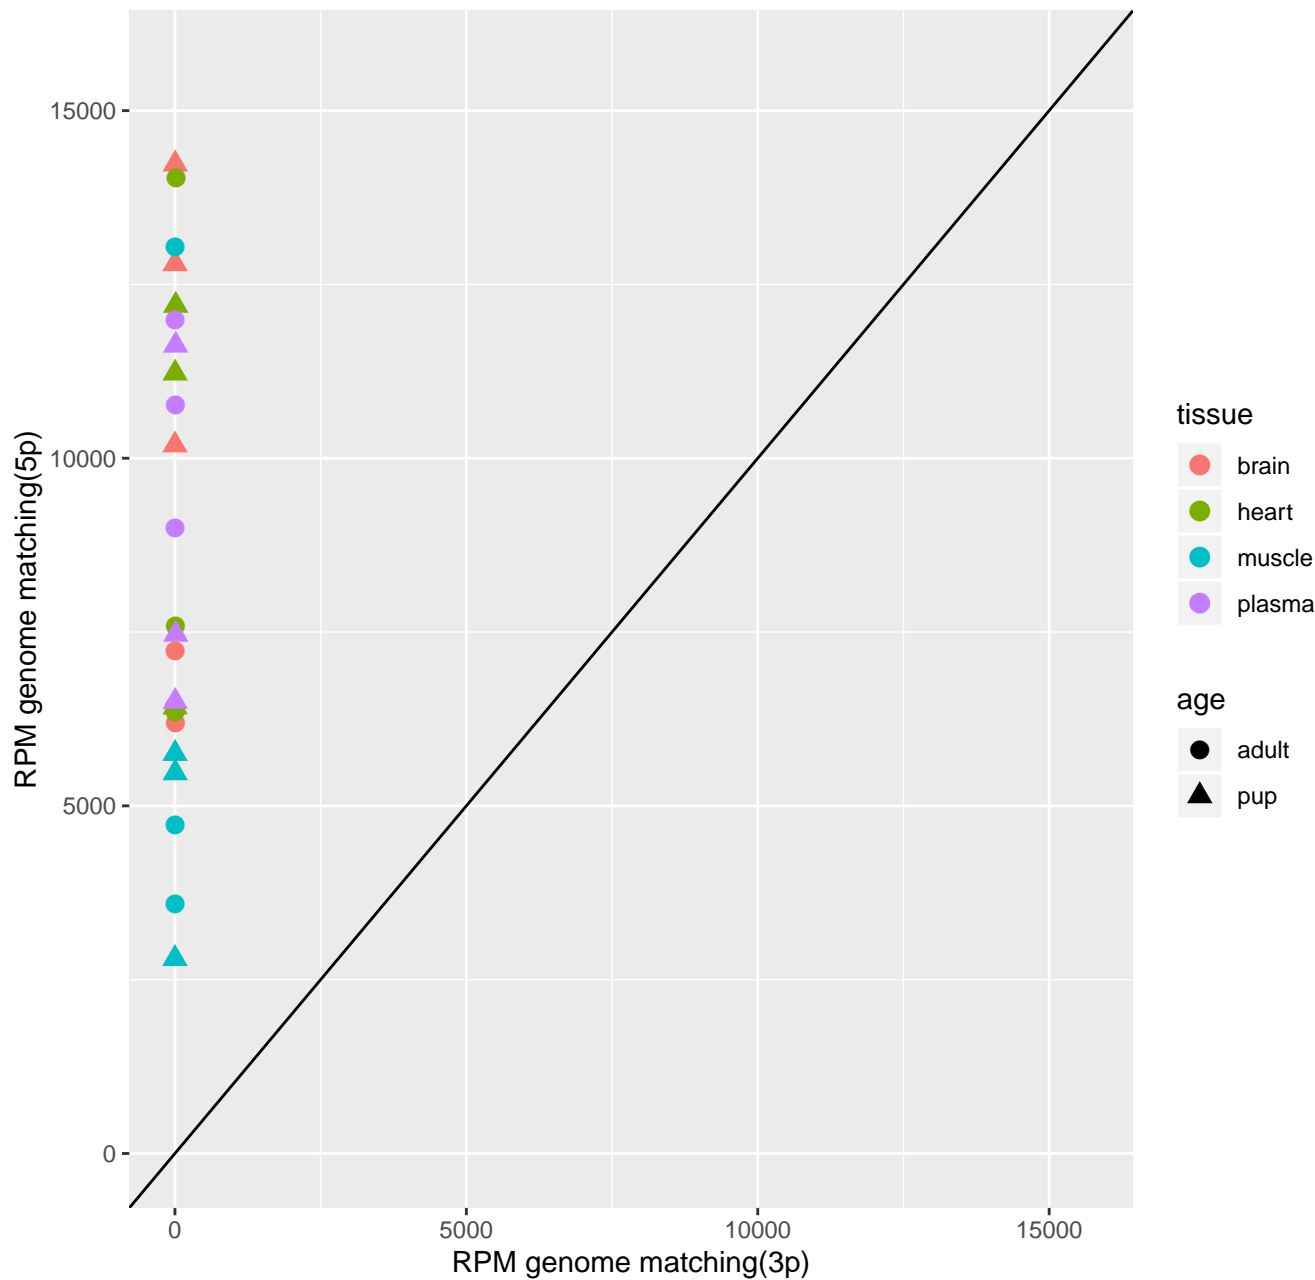

## novel\_82

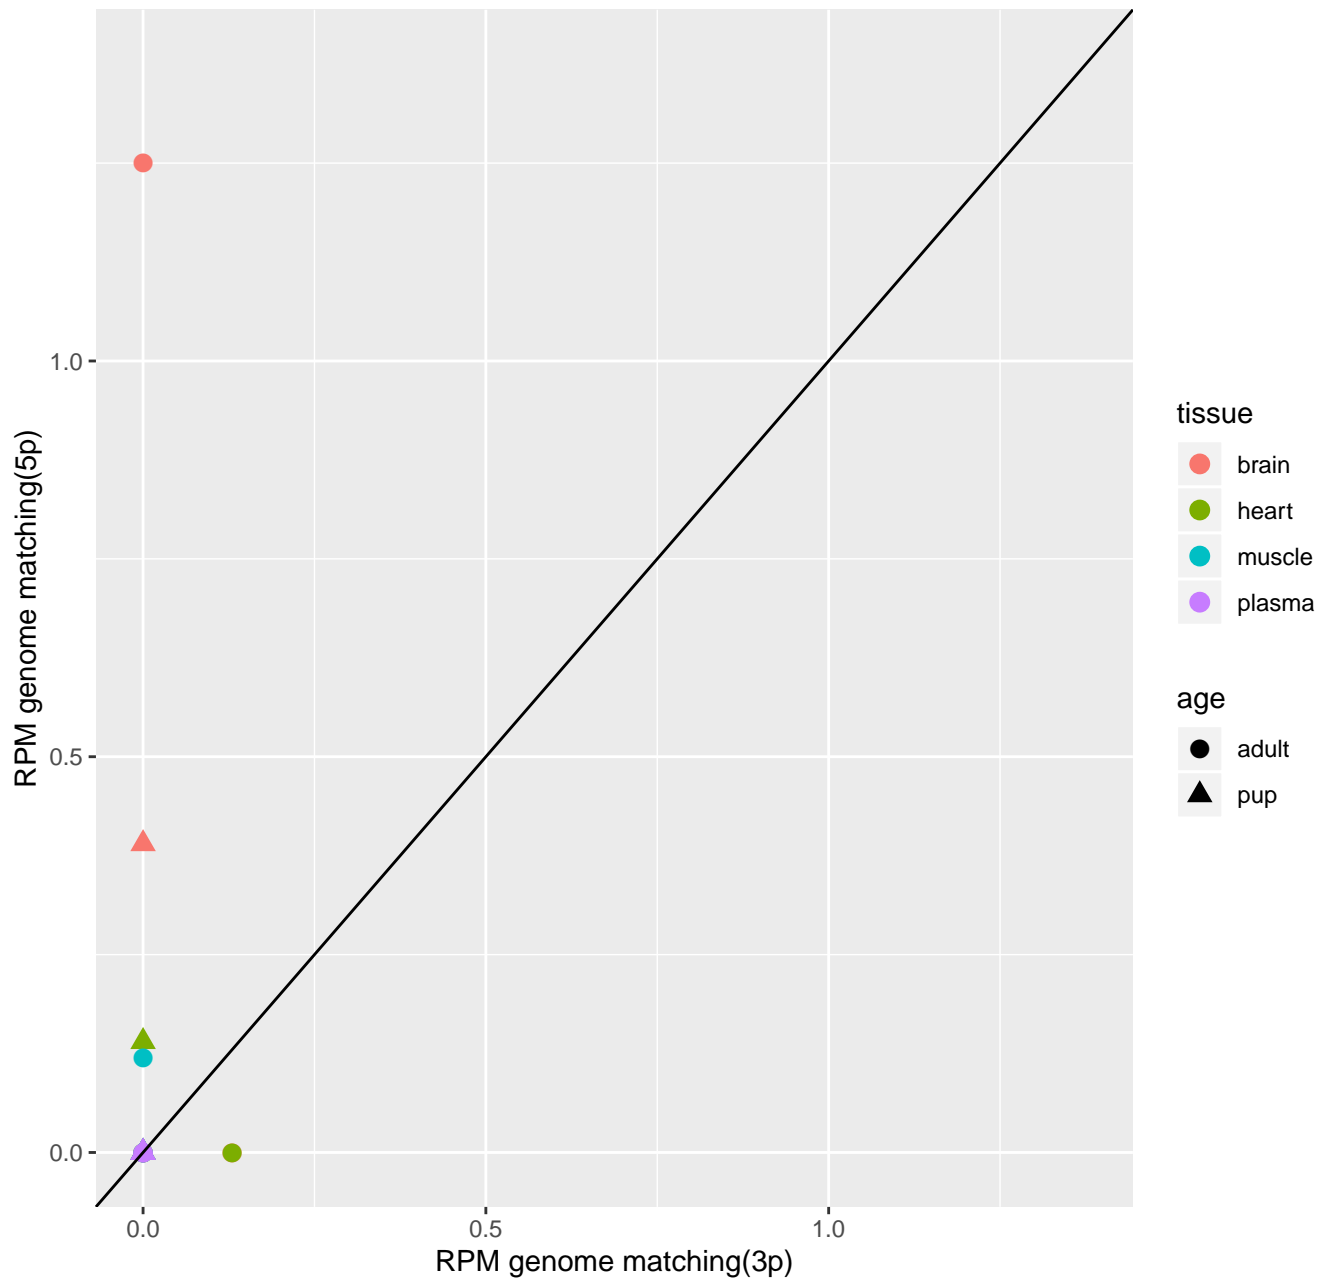

## lwe-miR-216b\_loc1

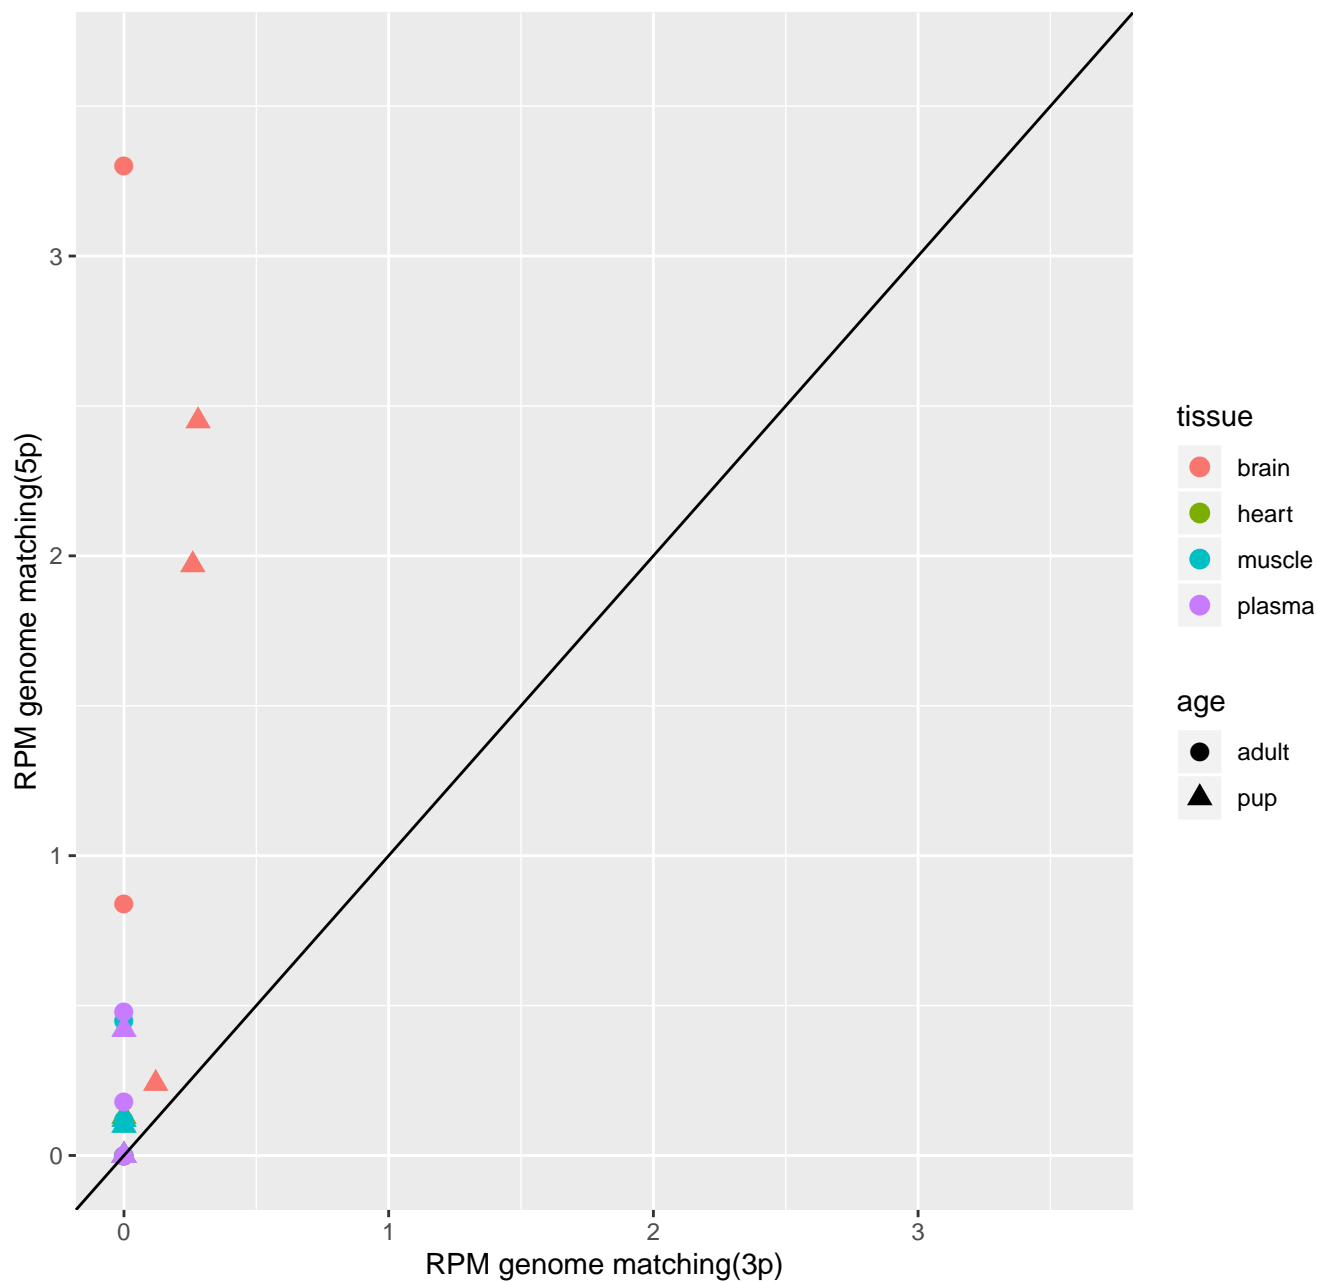

## lwe-miR-216a\_loc1

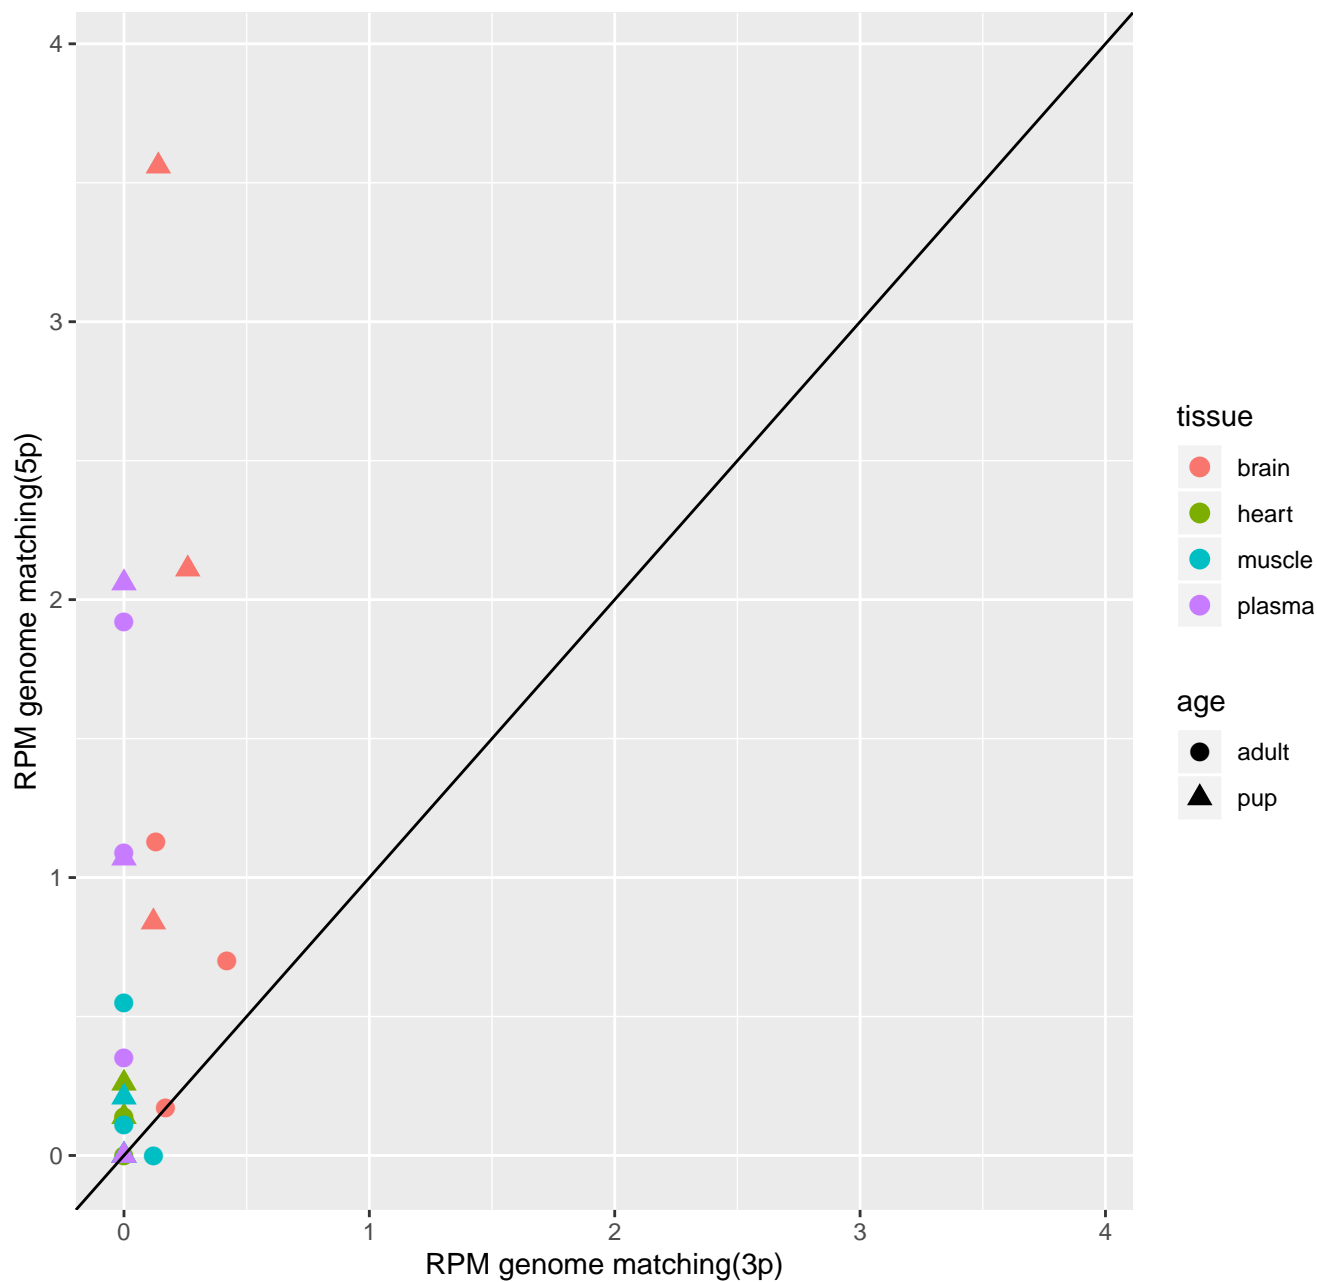



## lwe-miR-140\_loc1

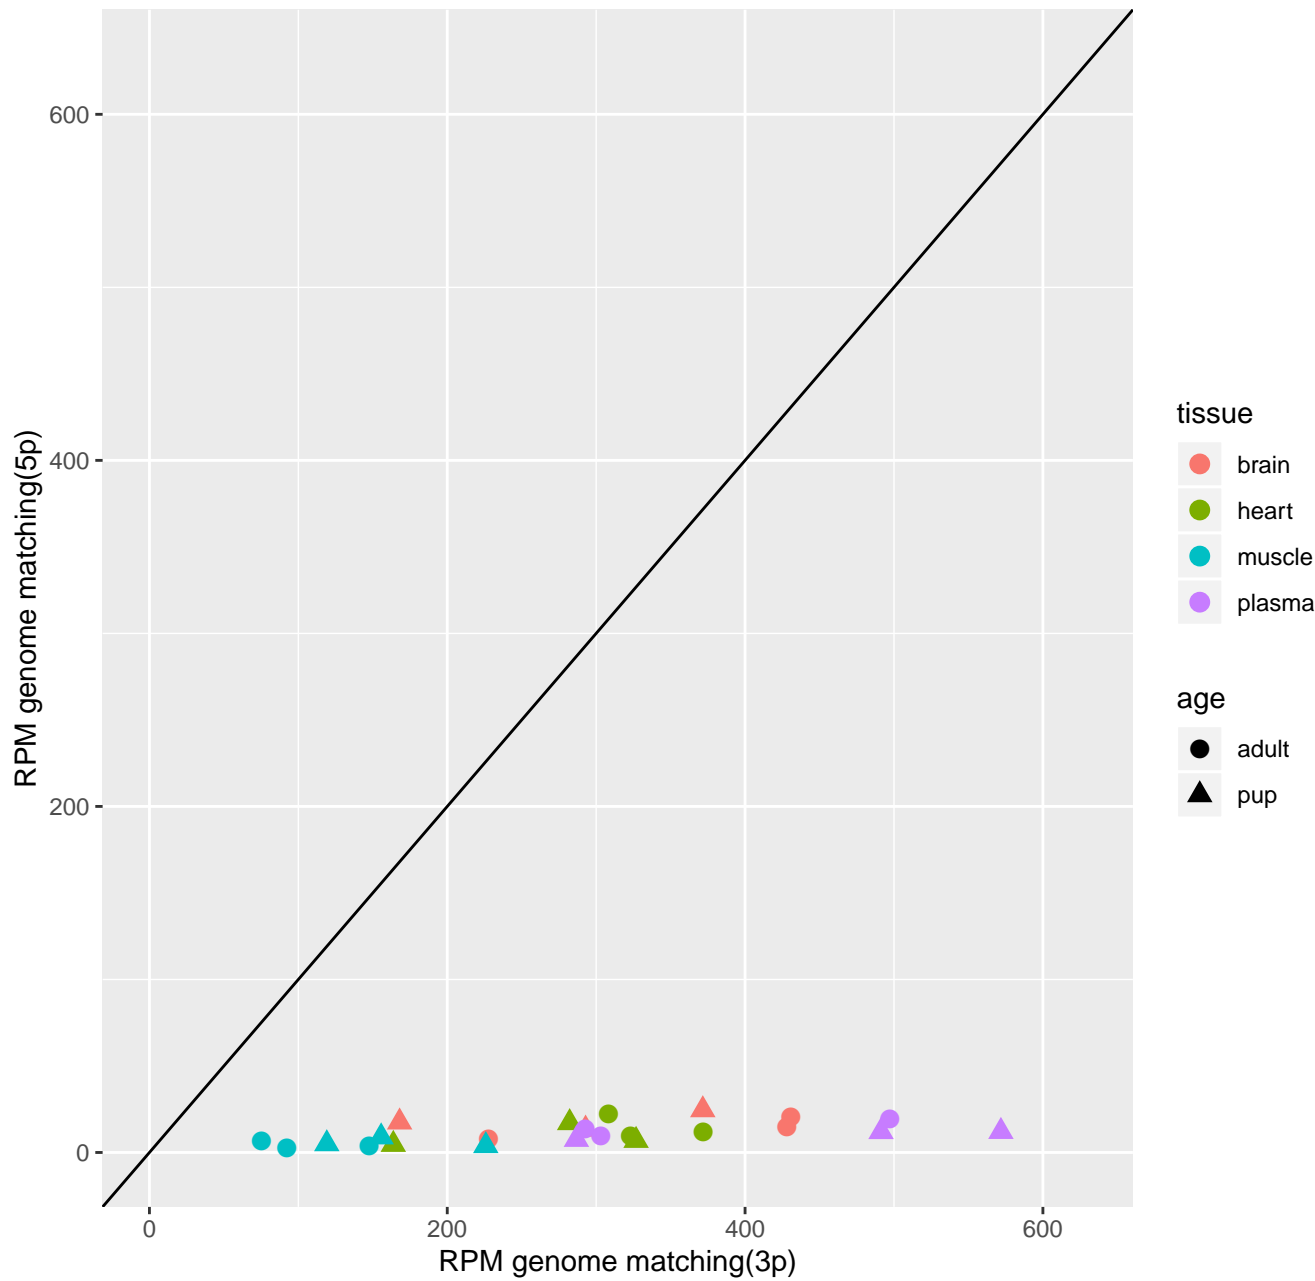

## lwe-miR-103\_loc1

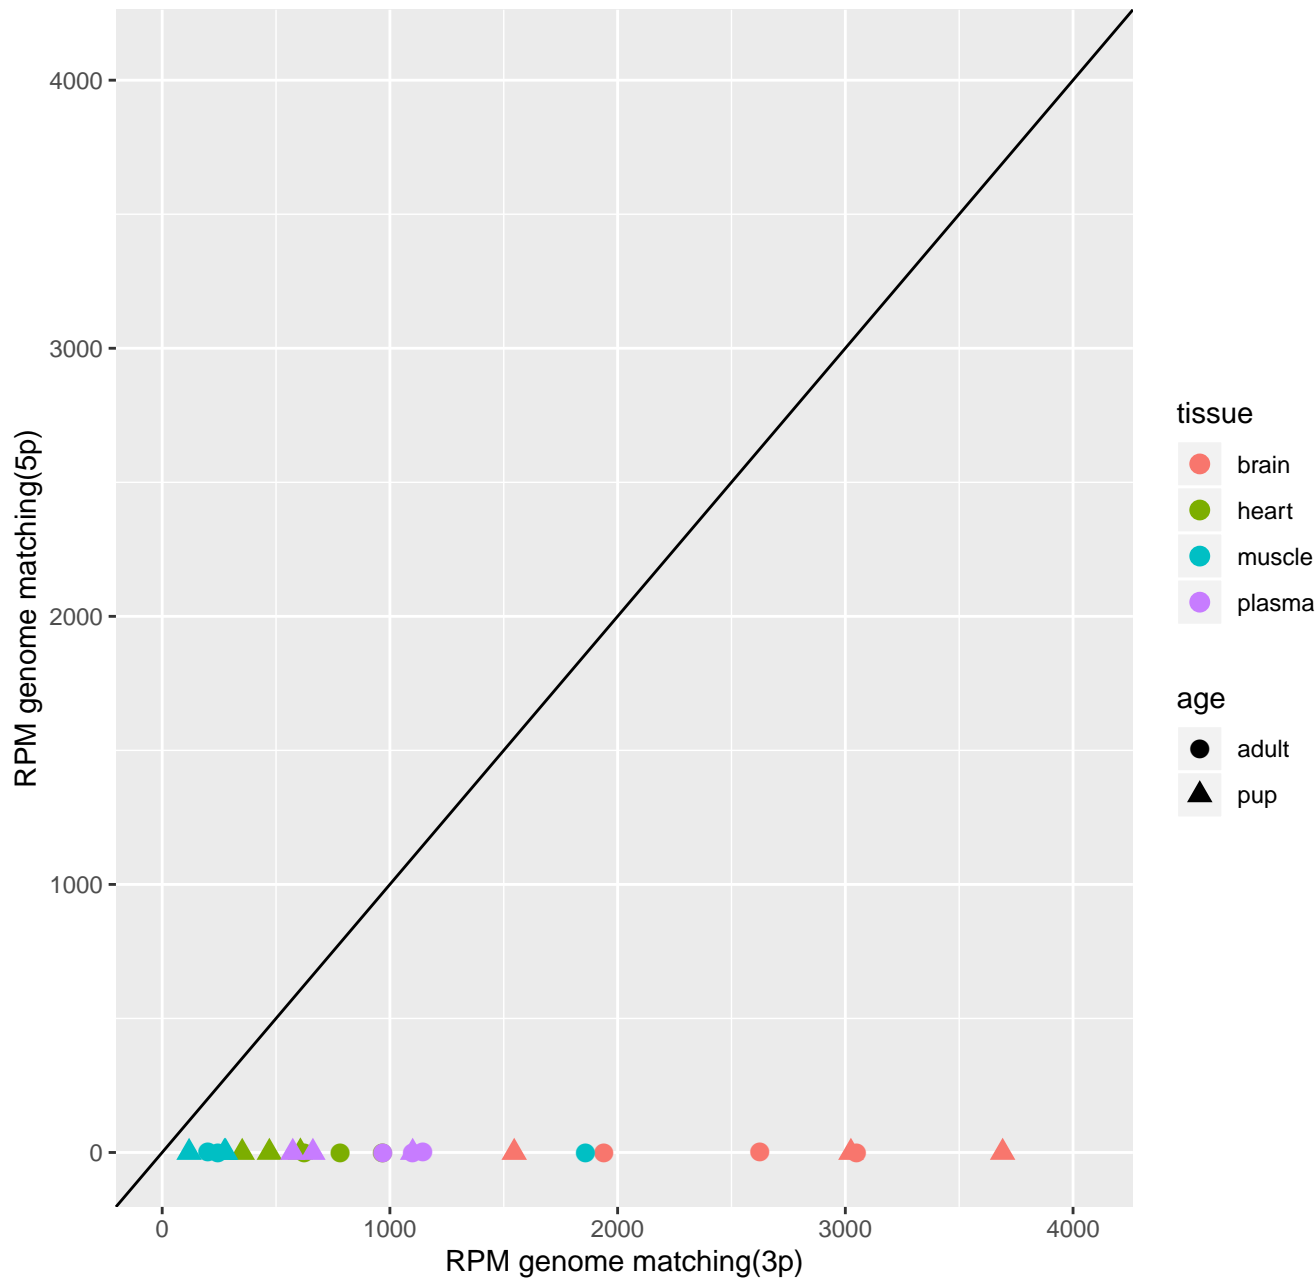

## lwe-miR-221\_loc1

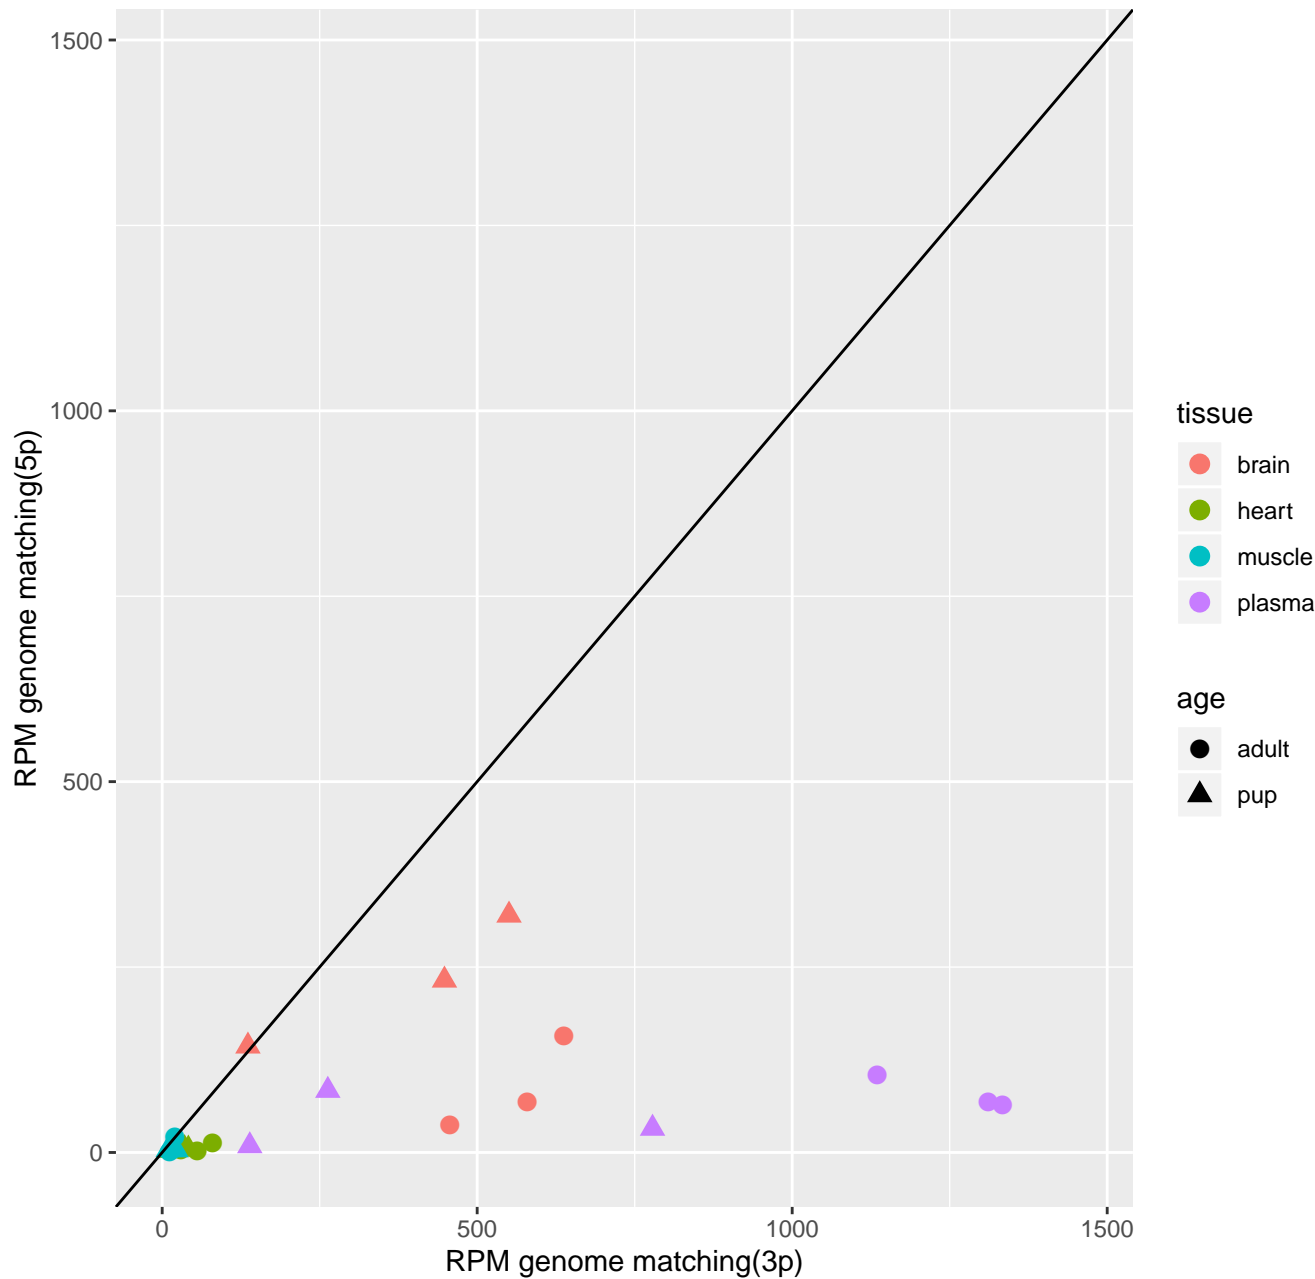

## lwe-miR-103\_loc2

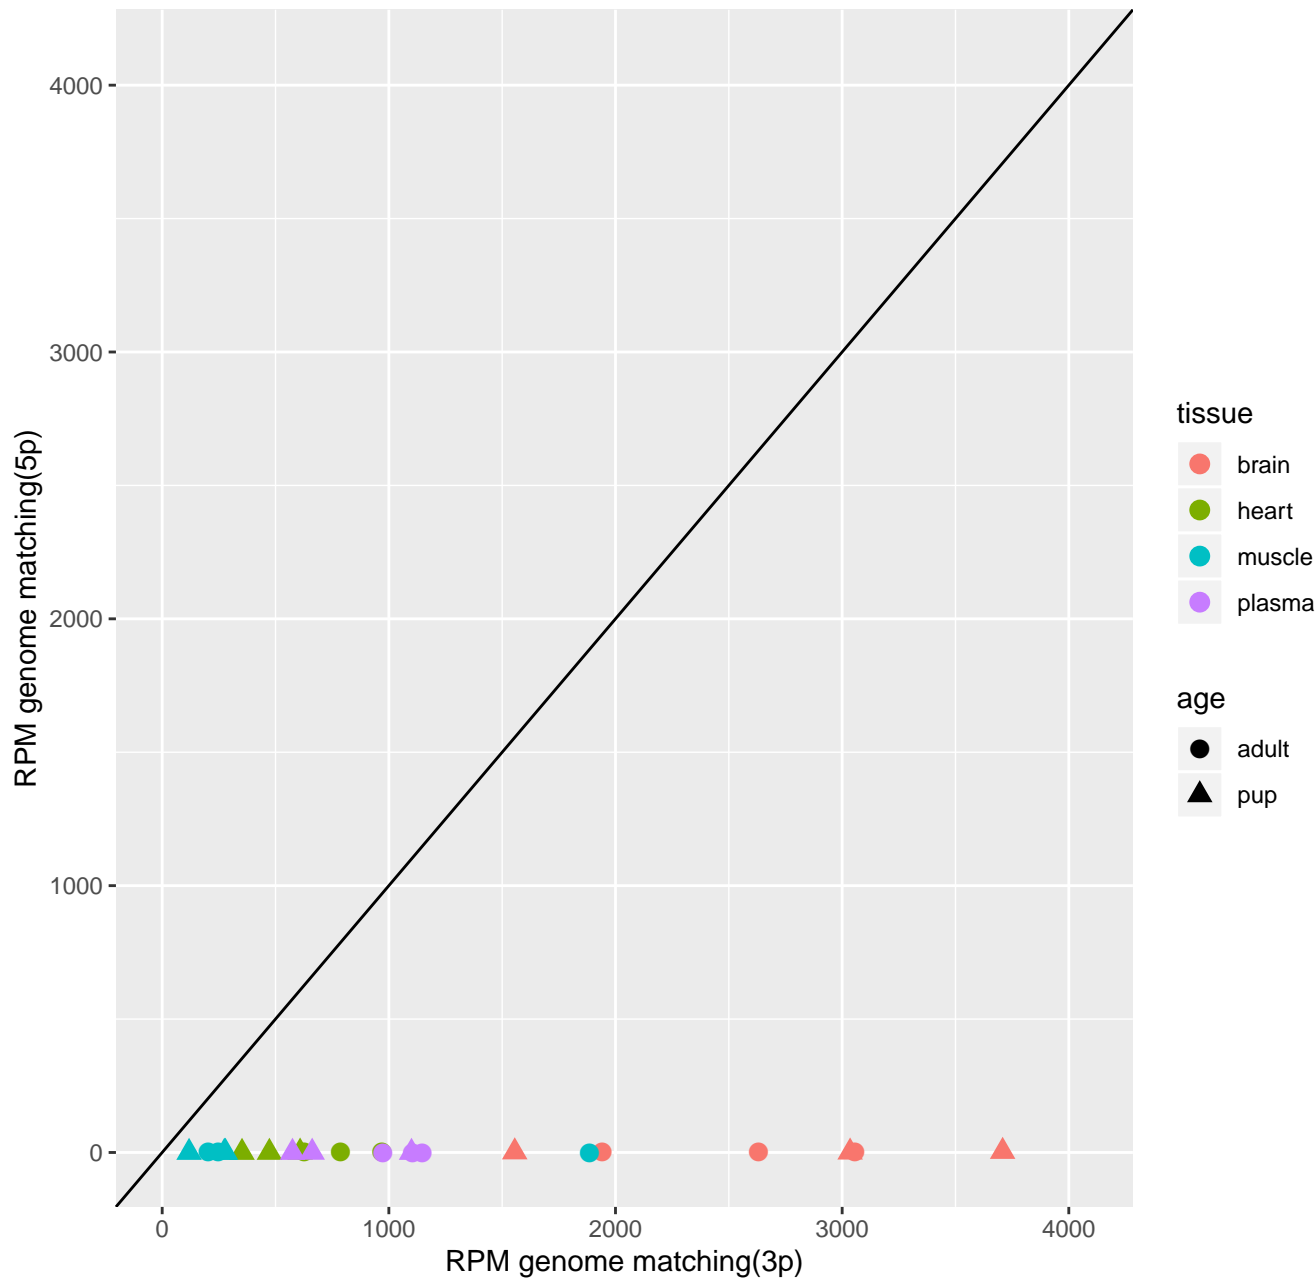

# lwe-miR-671\_loc1

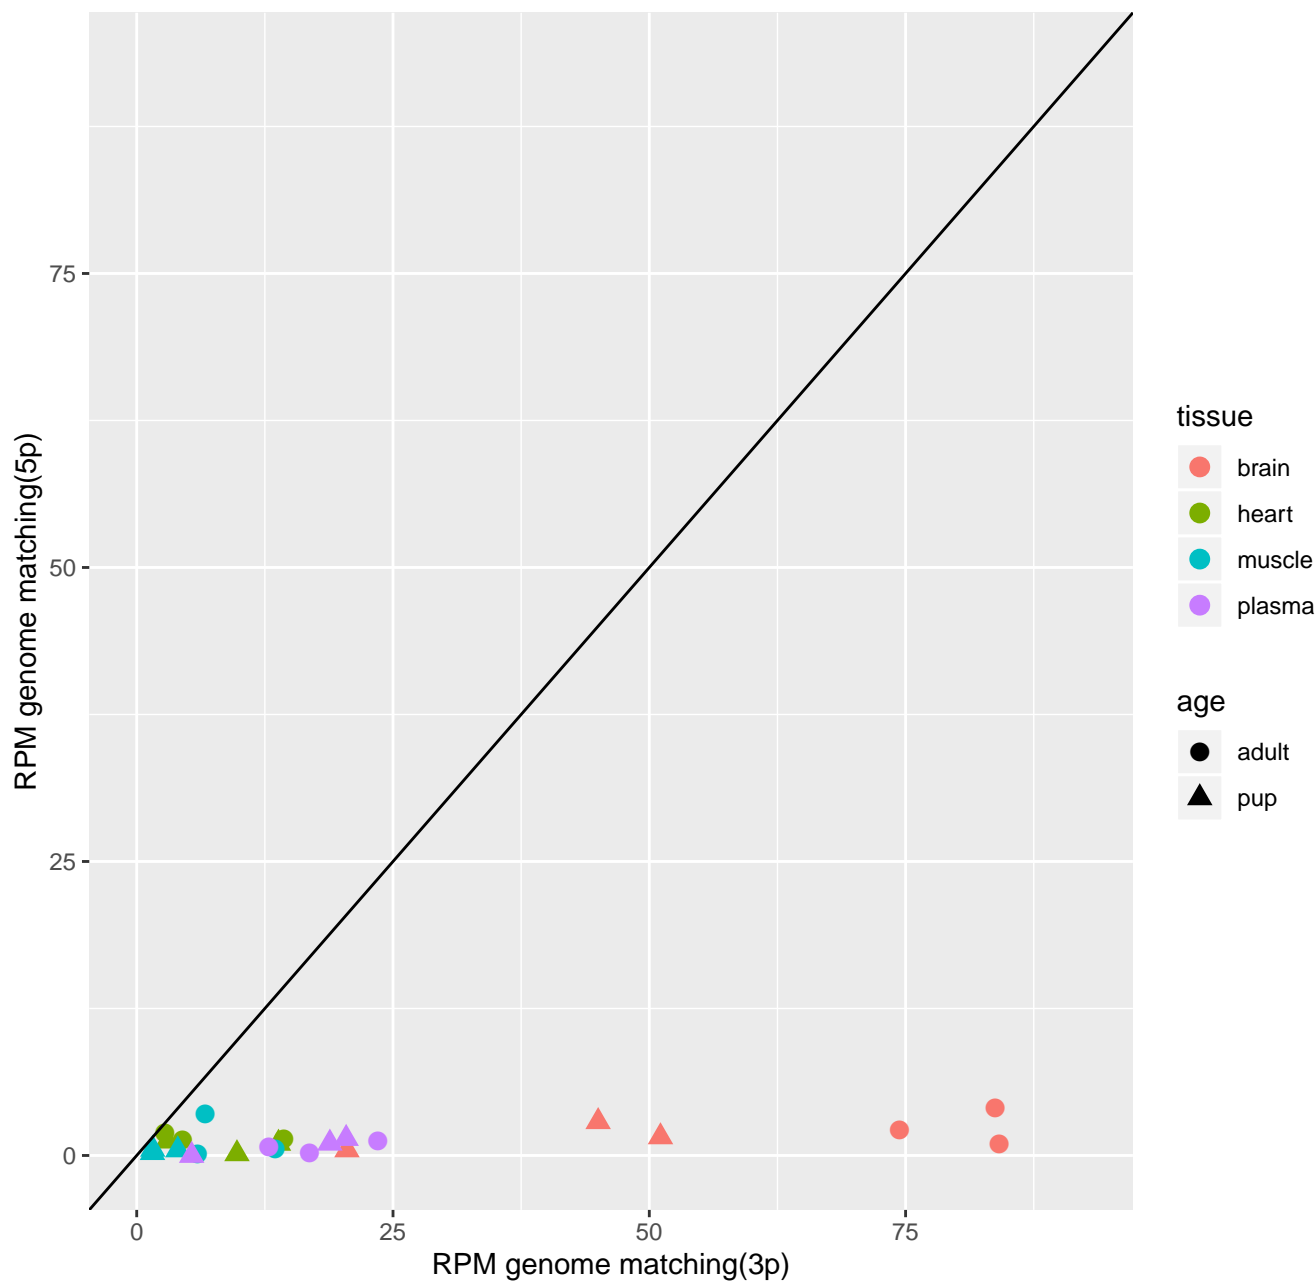

# novel\_83

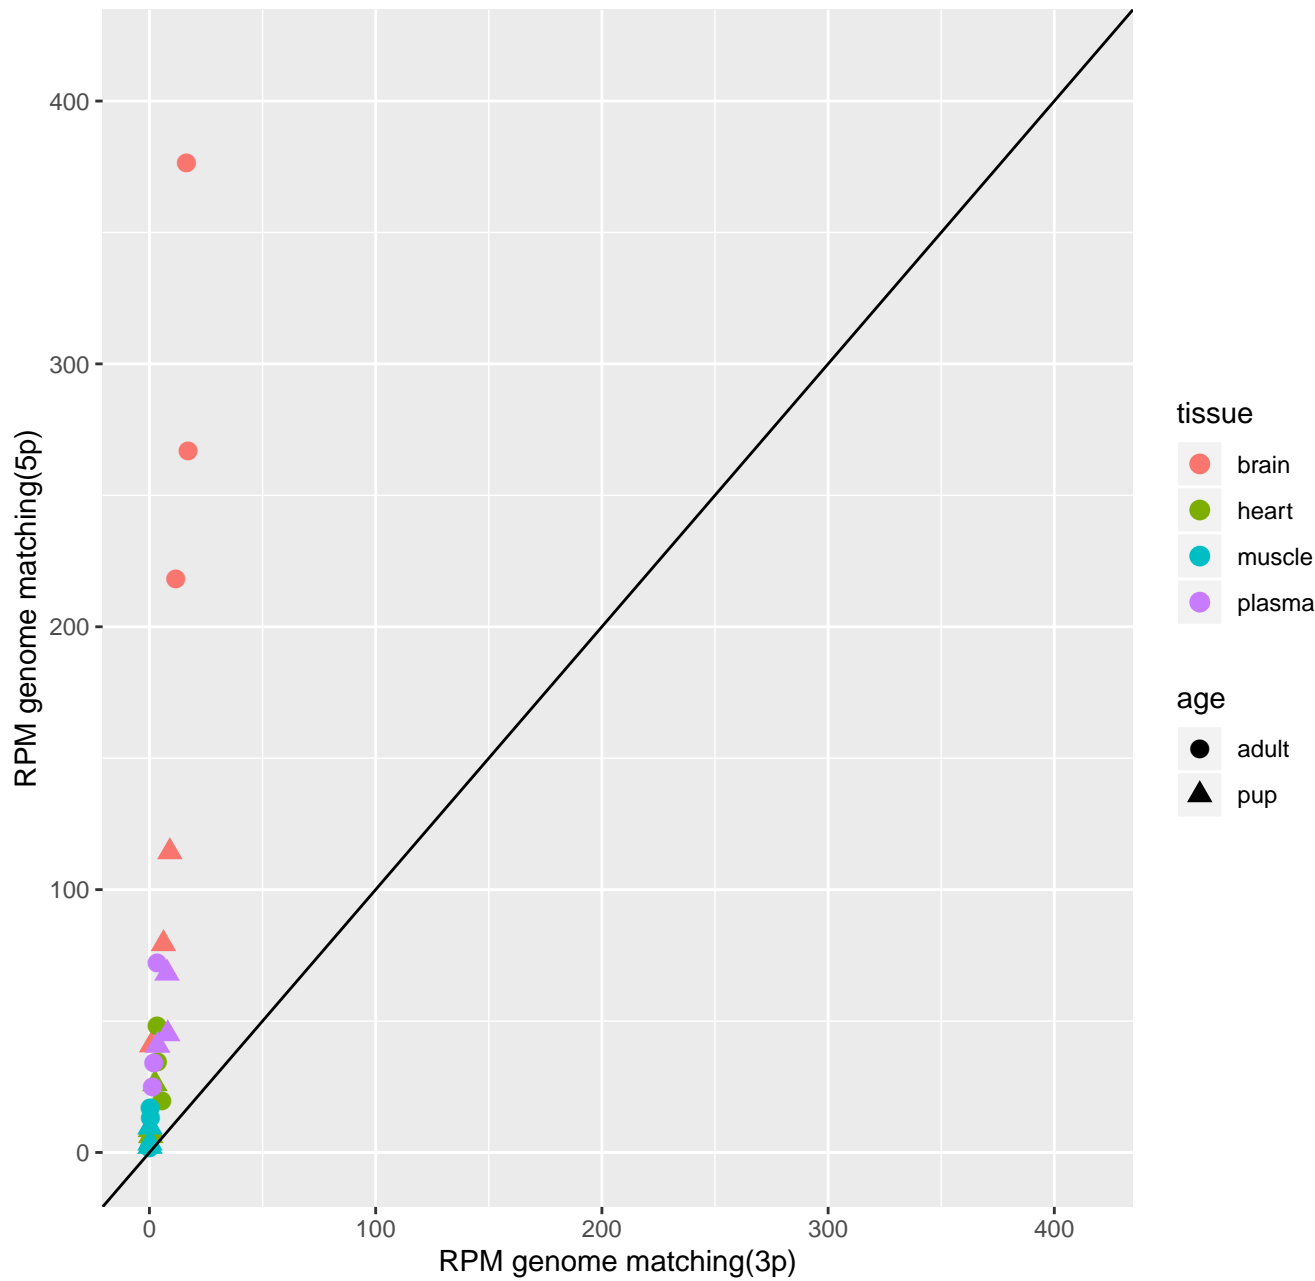

## novel\_84

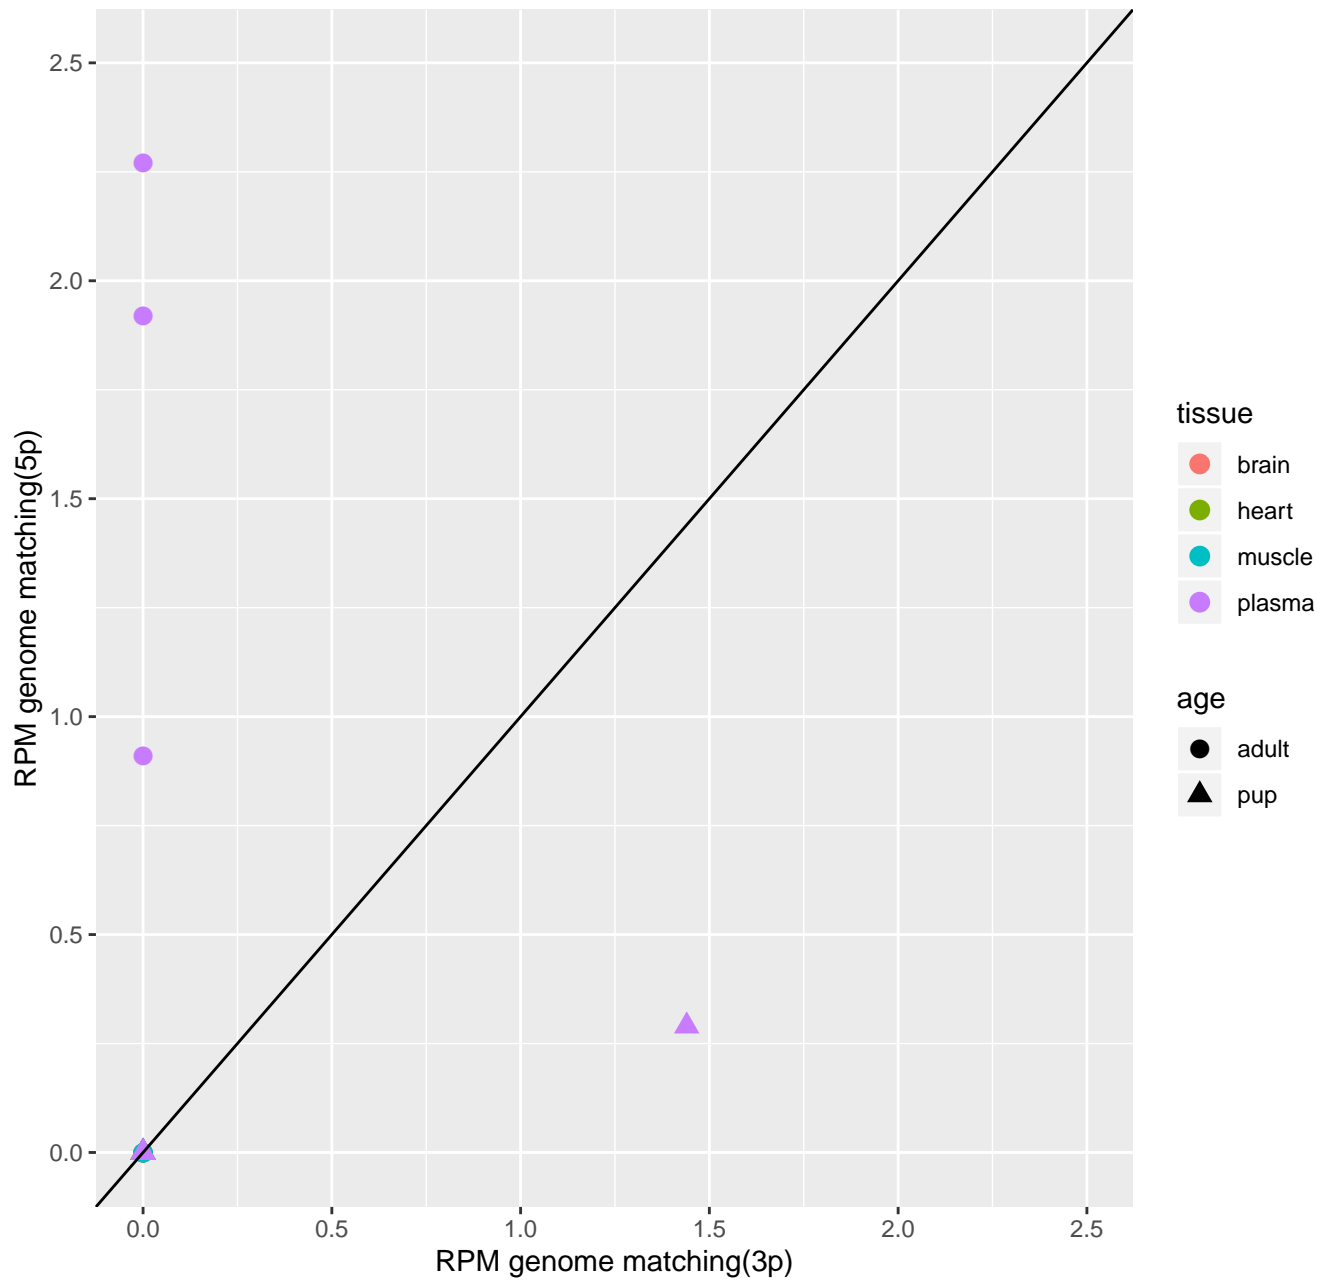

## lwe-miR-296\_loc1

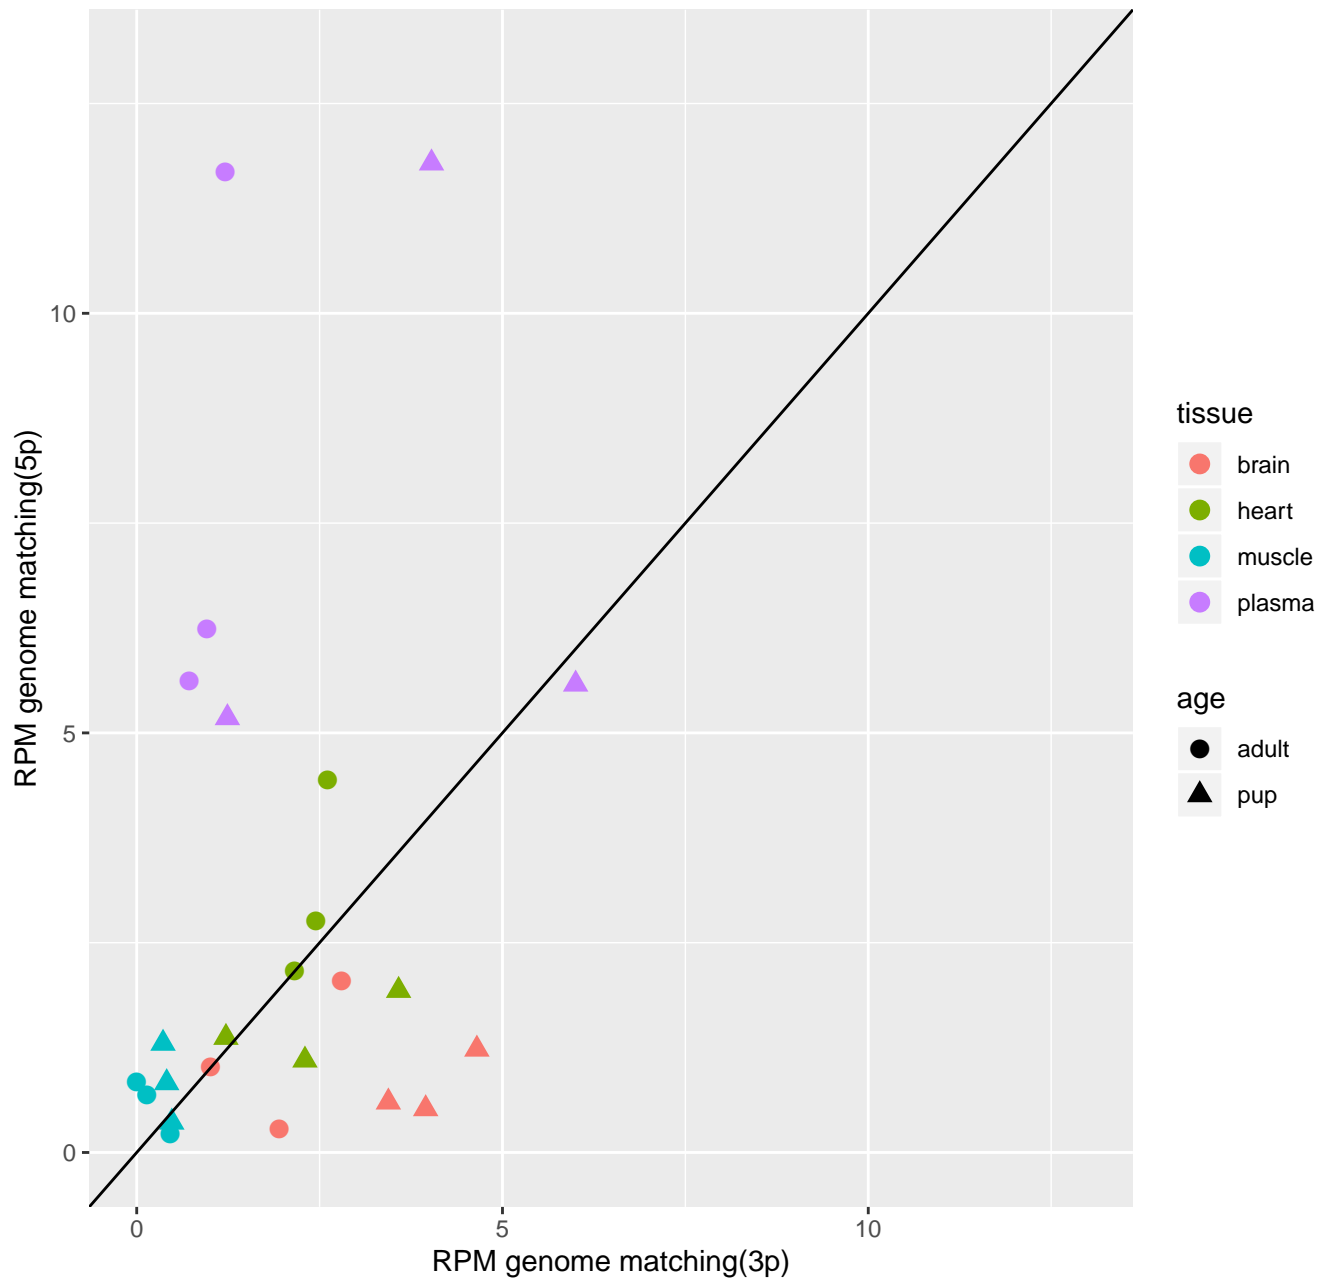



# lwe-miR-197\_loc1

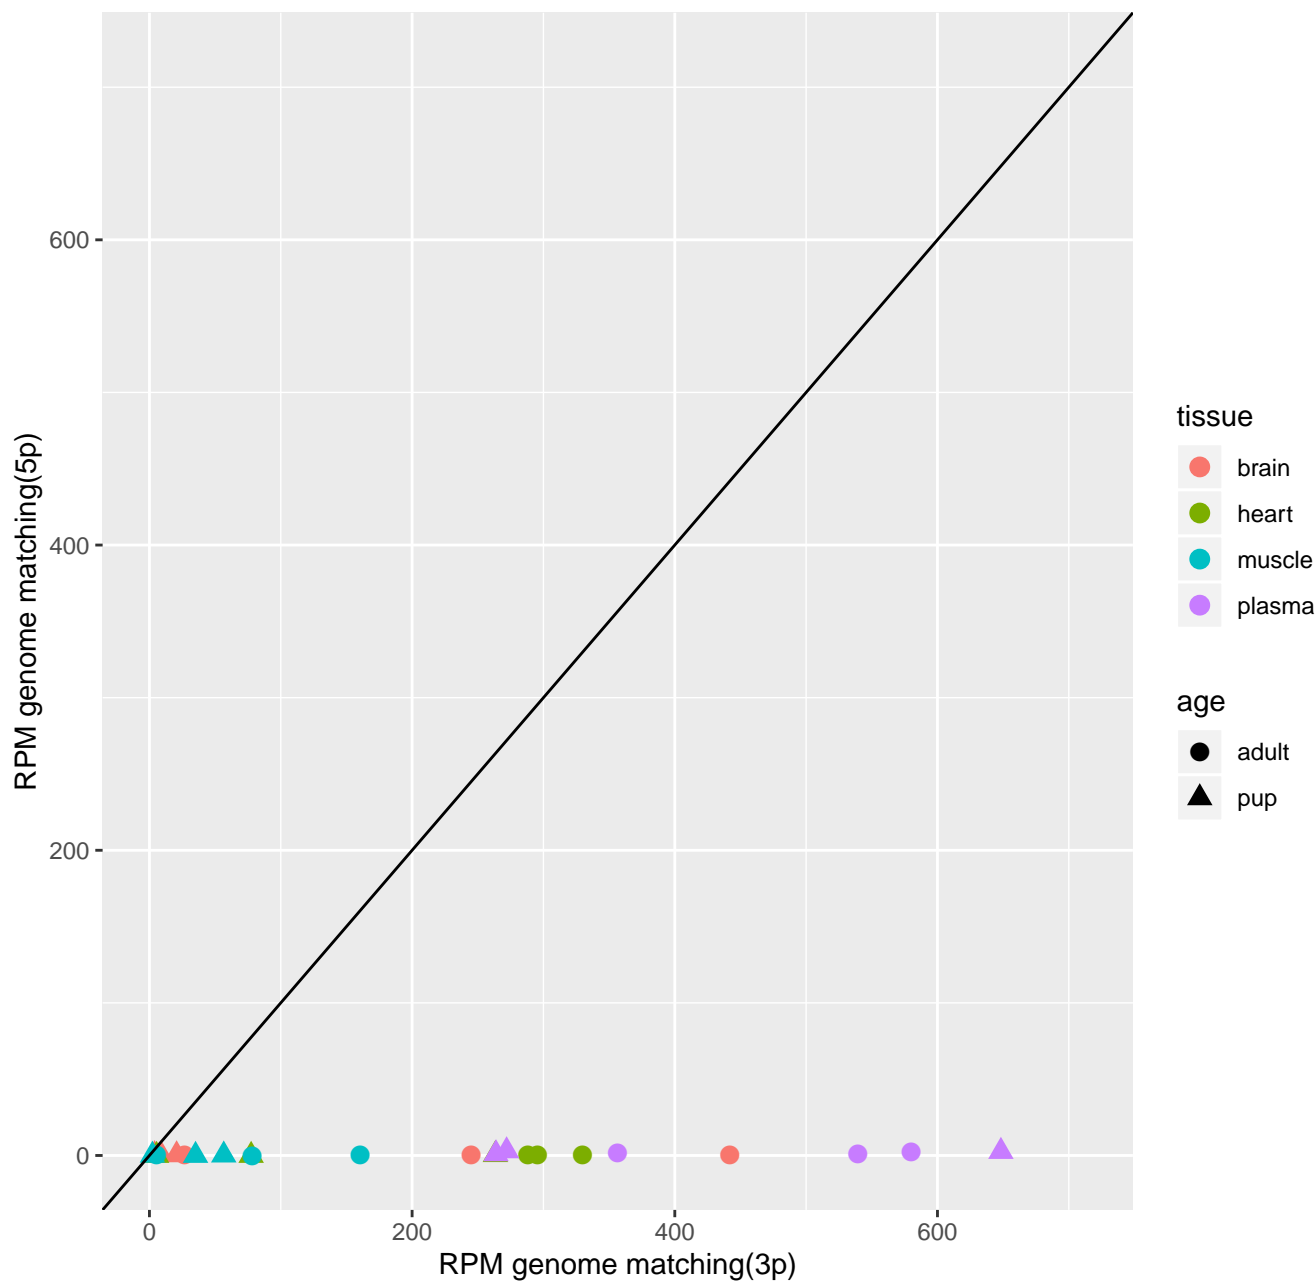

novel\_85

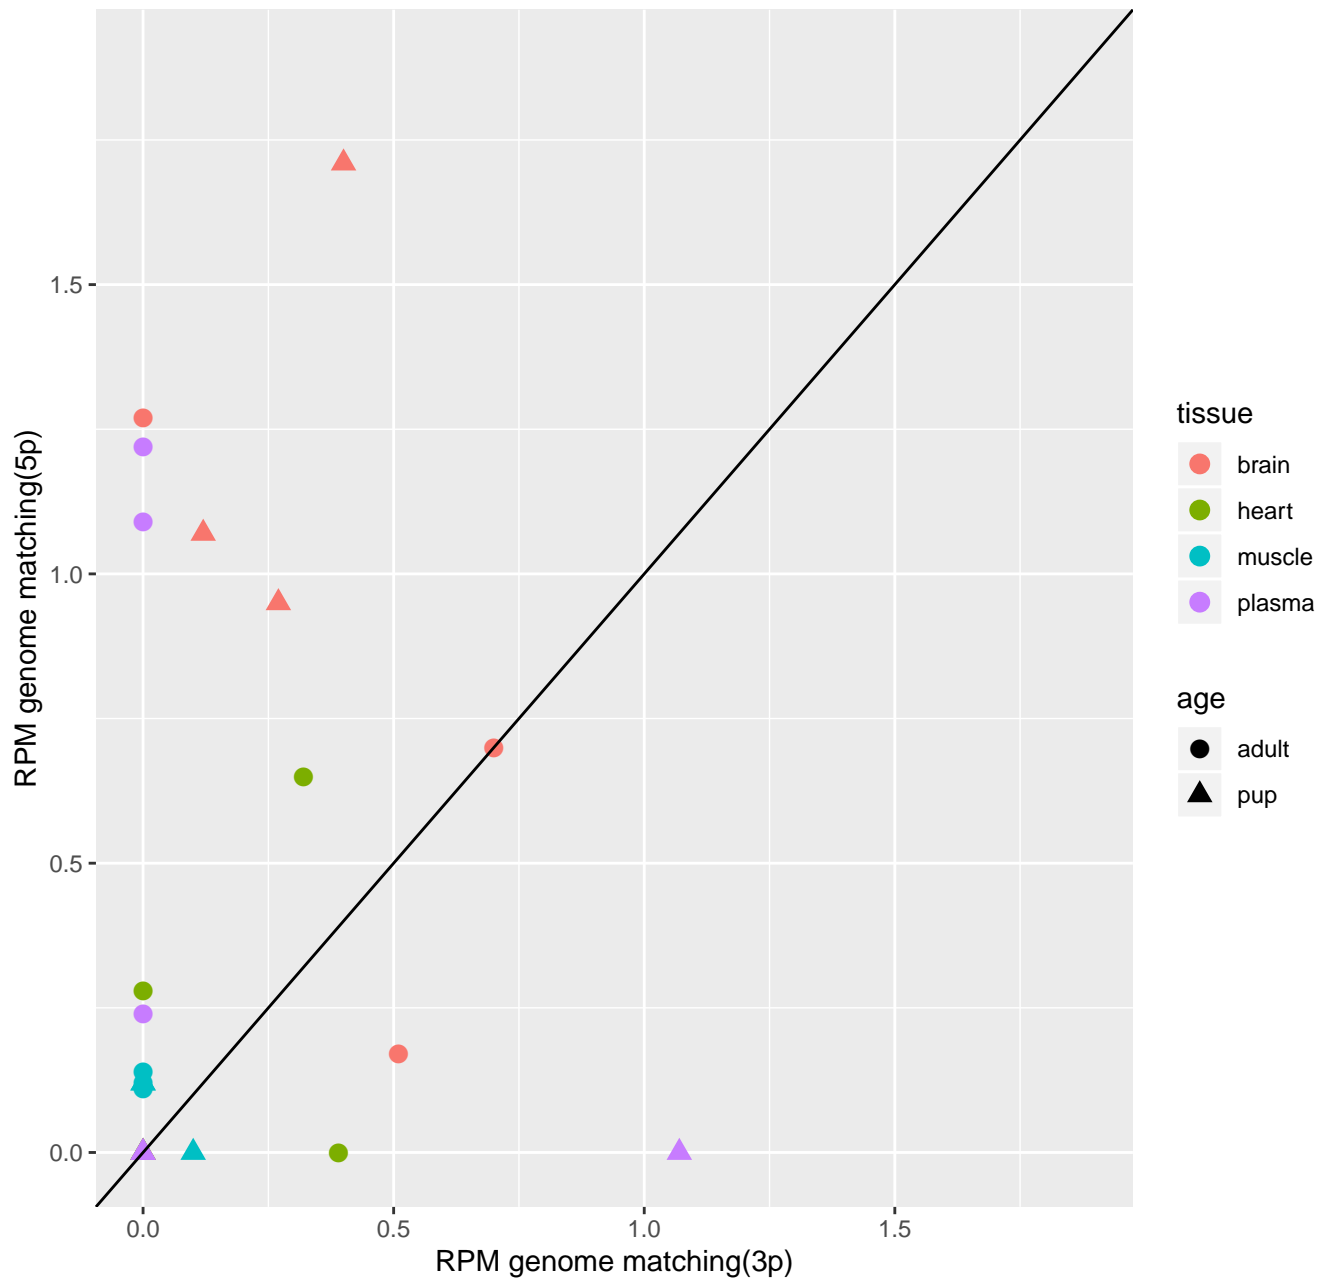

## lwe-miR-532\_loc1

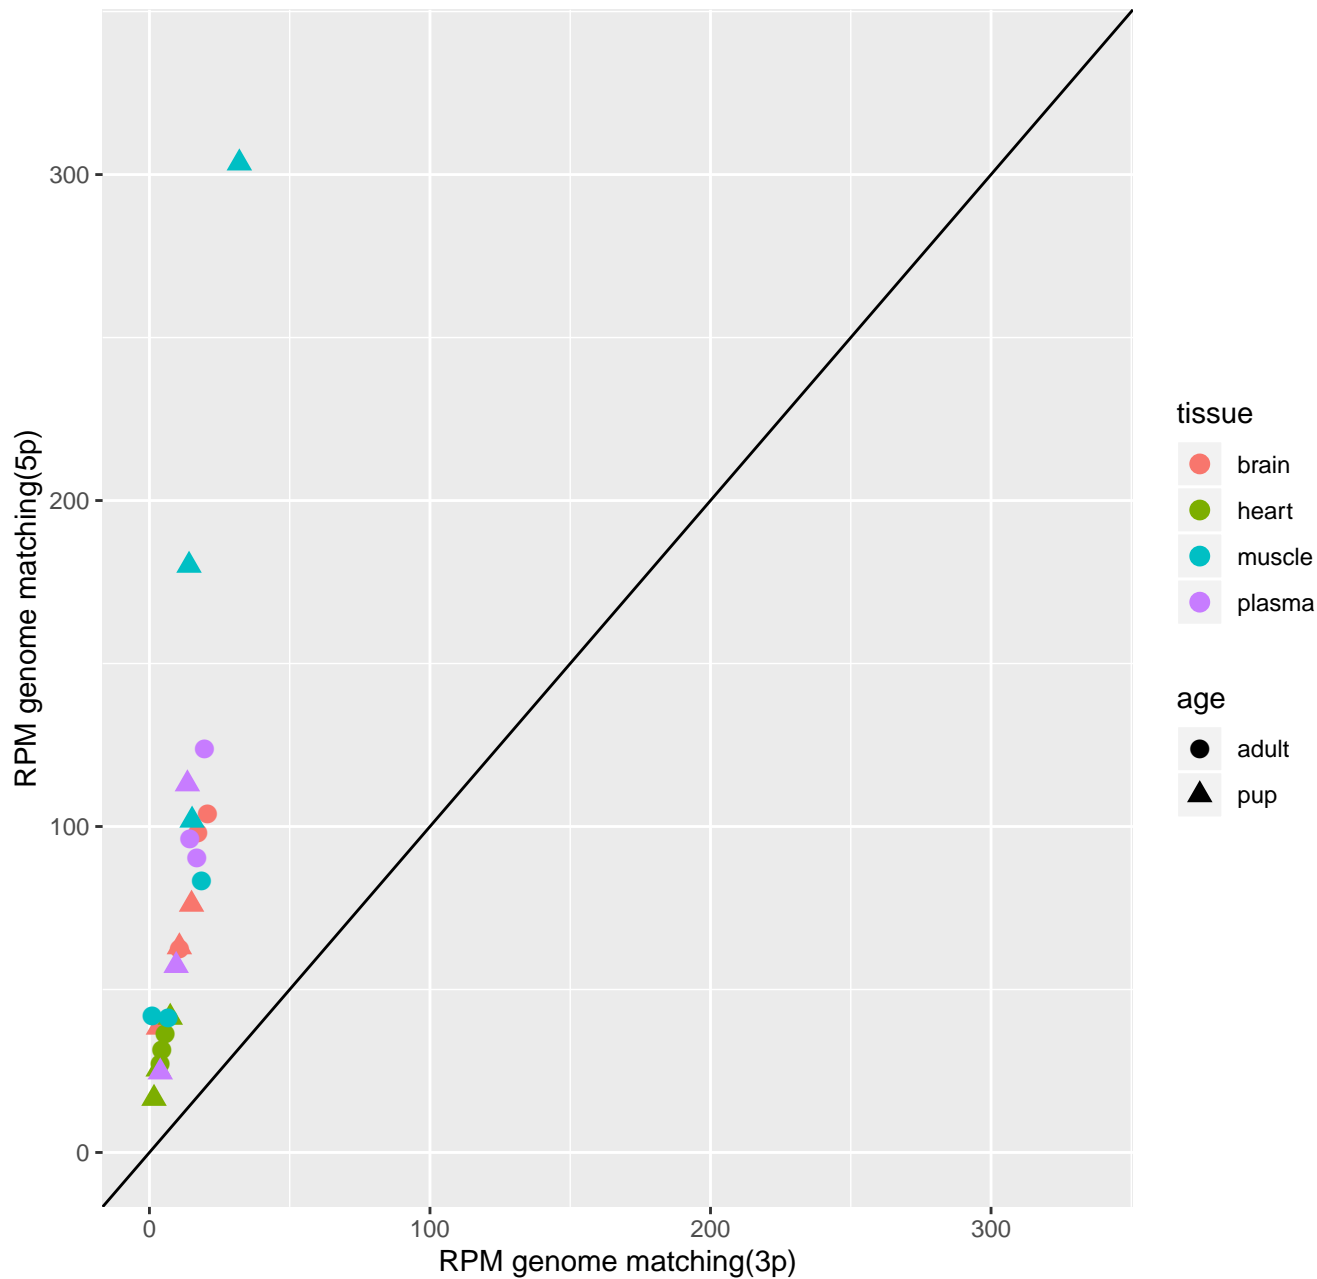

## lwe-miR-188\_loc1

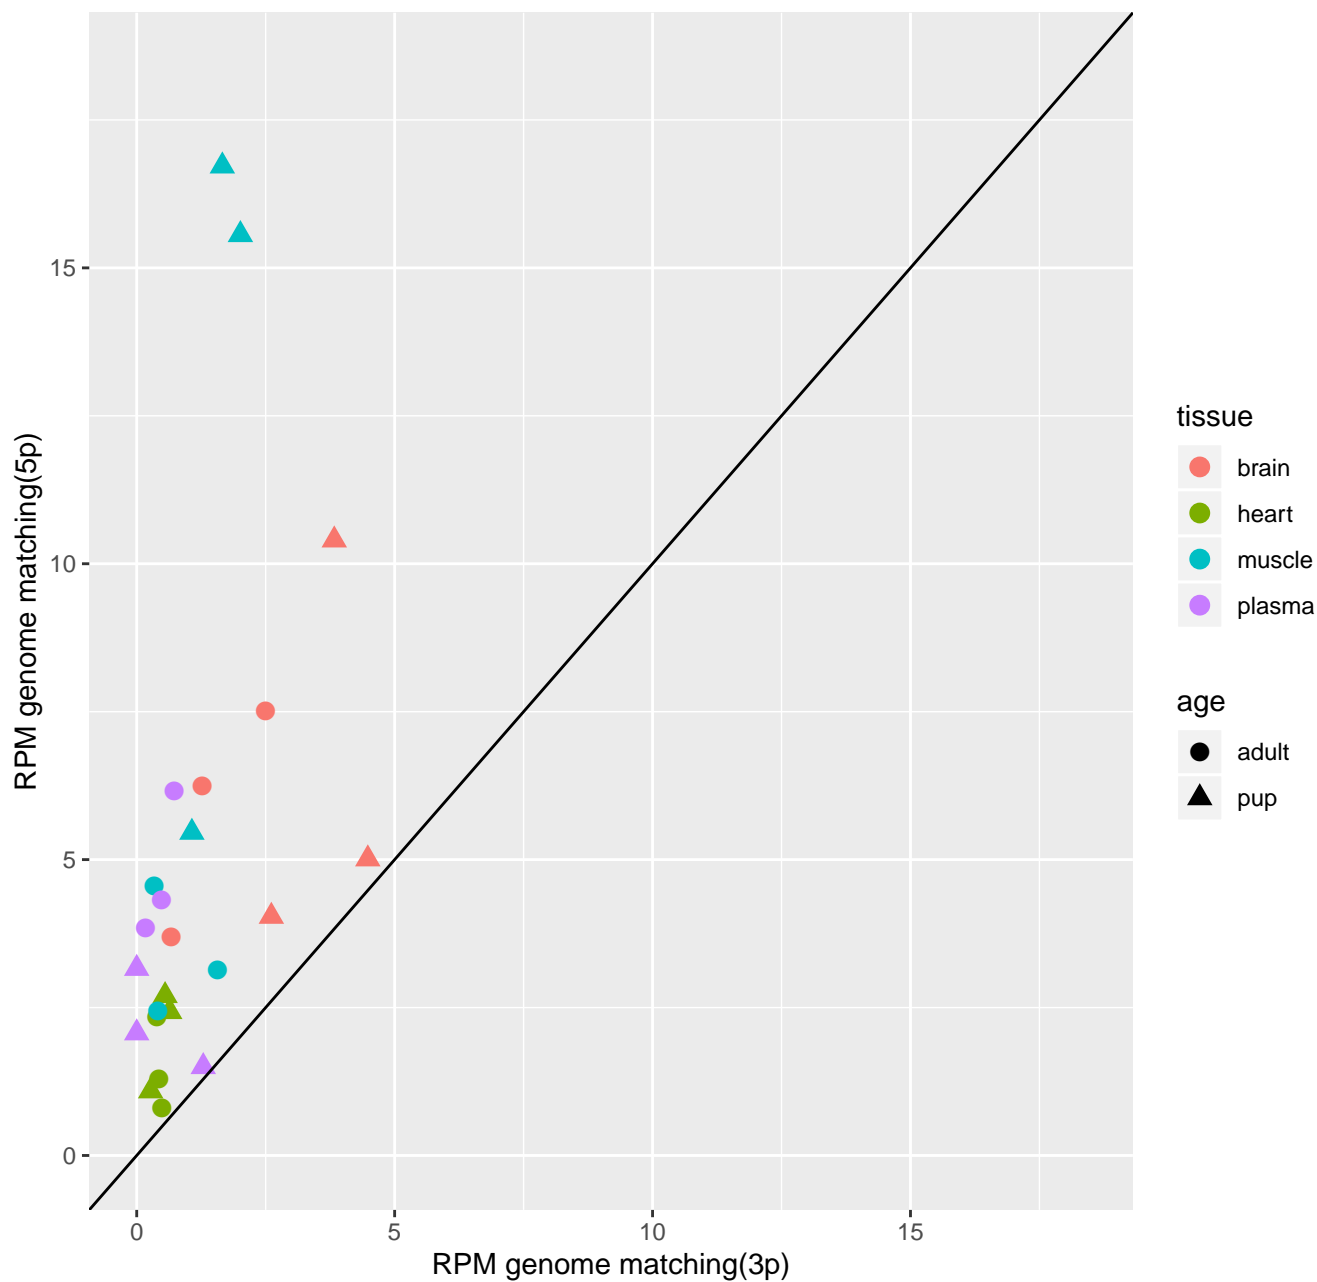

# lwe-miR-500b\_loc1

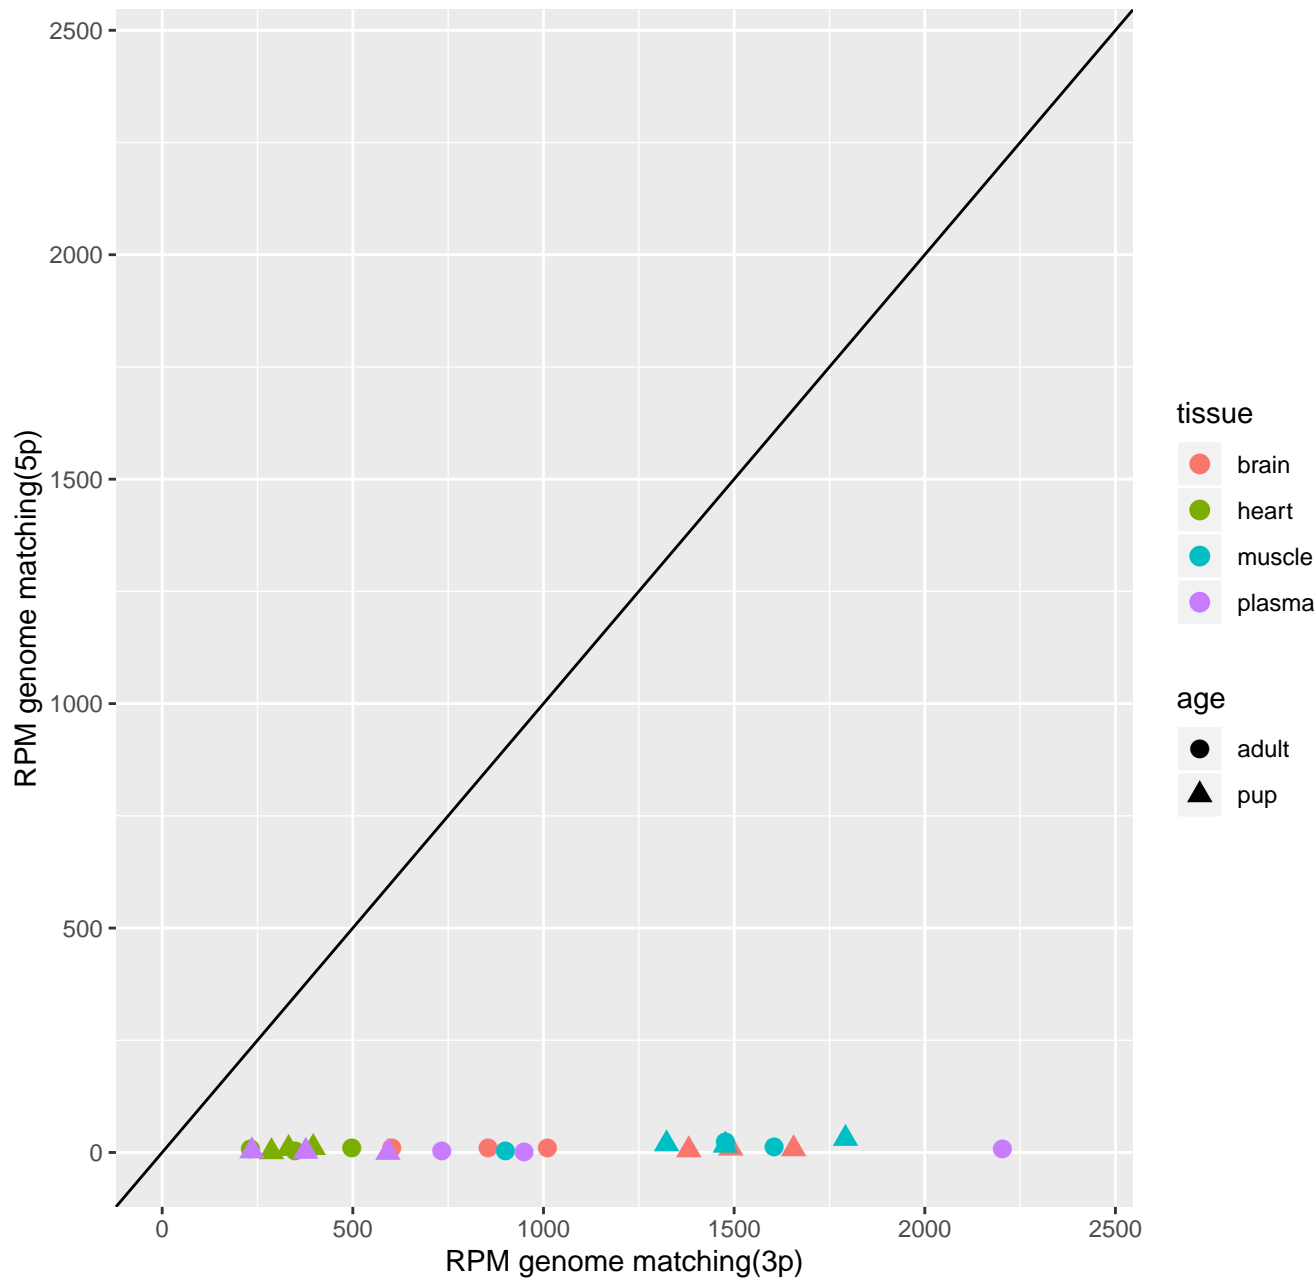

# lwe-miR-500b\_loc2

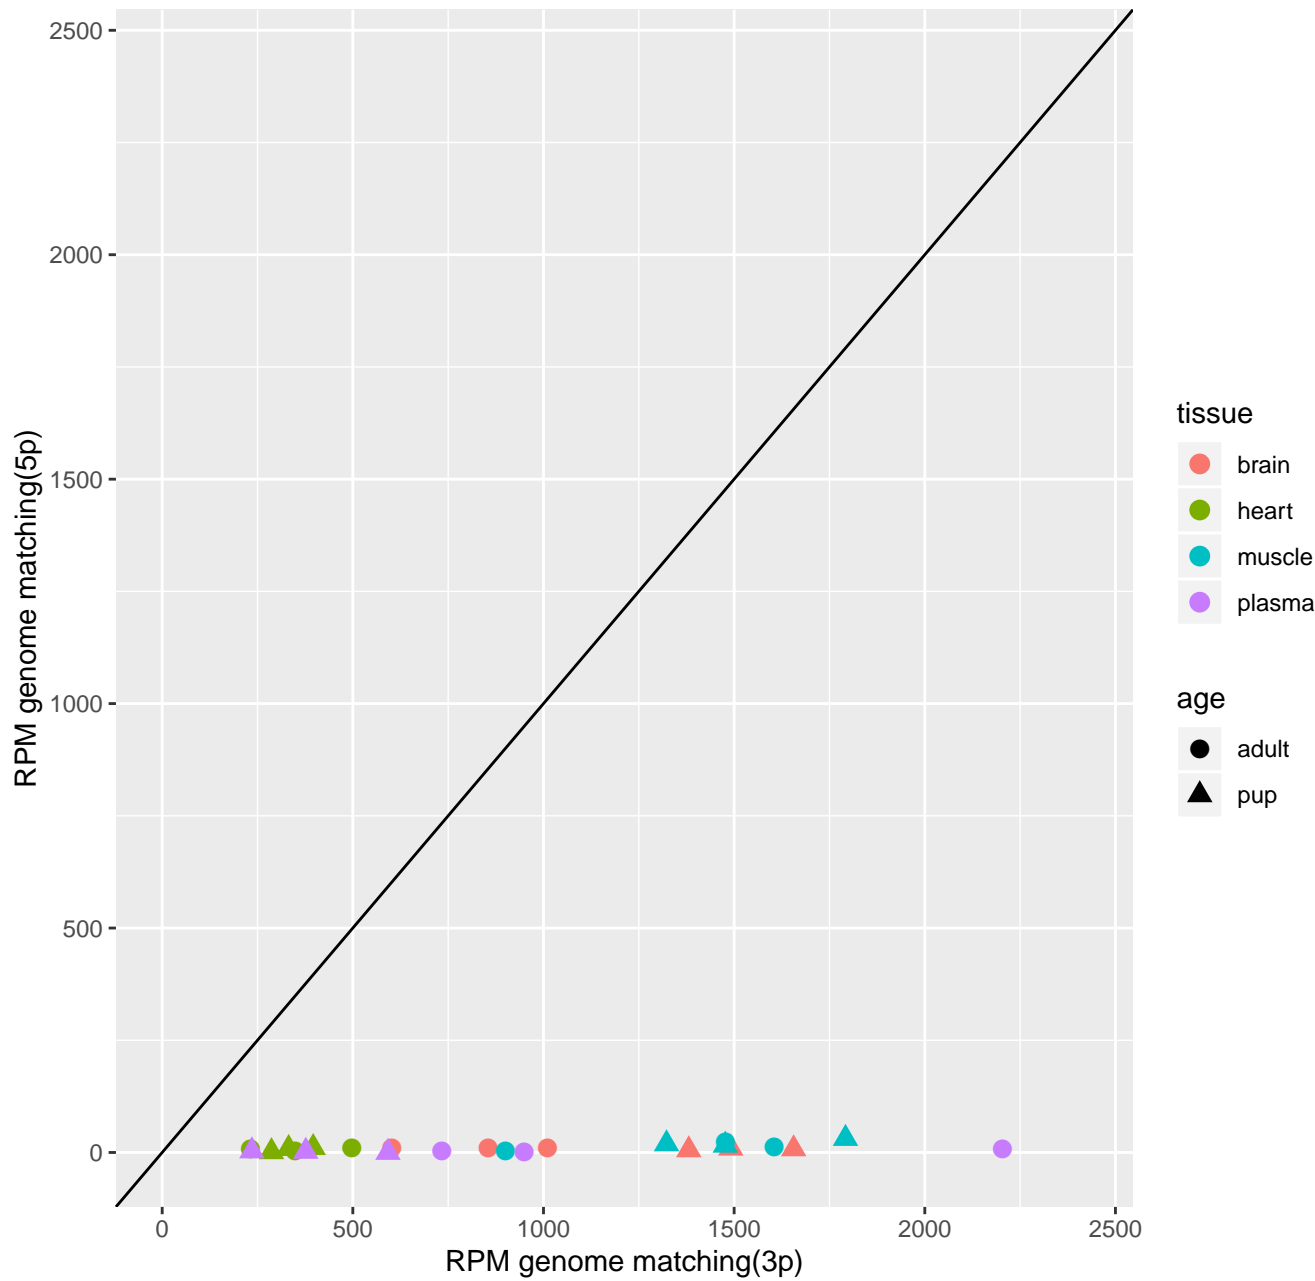

## lwe-miR-660\_loc1

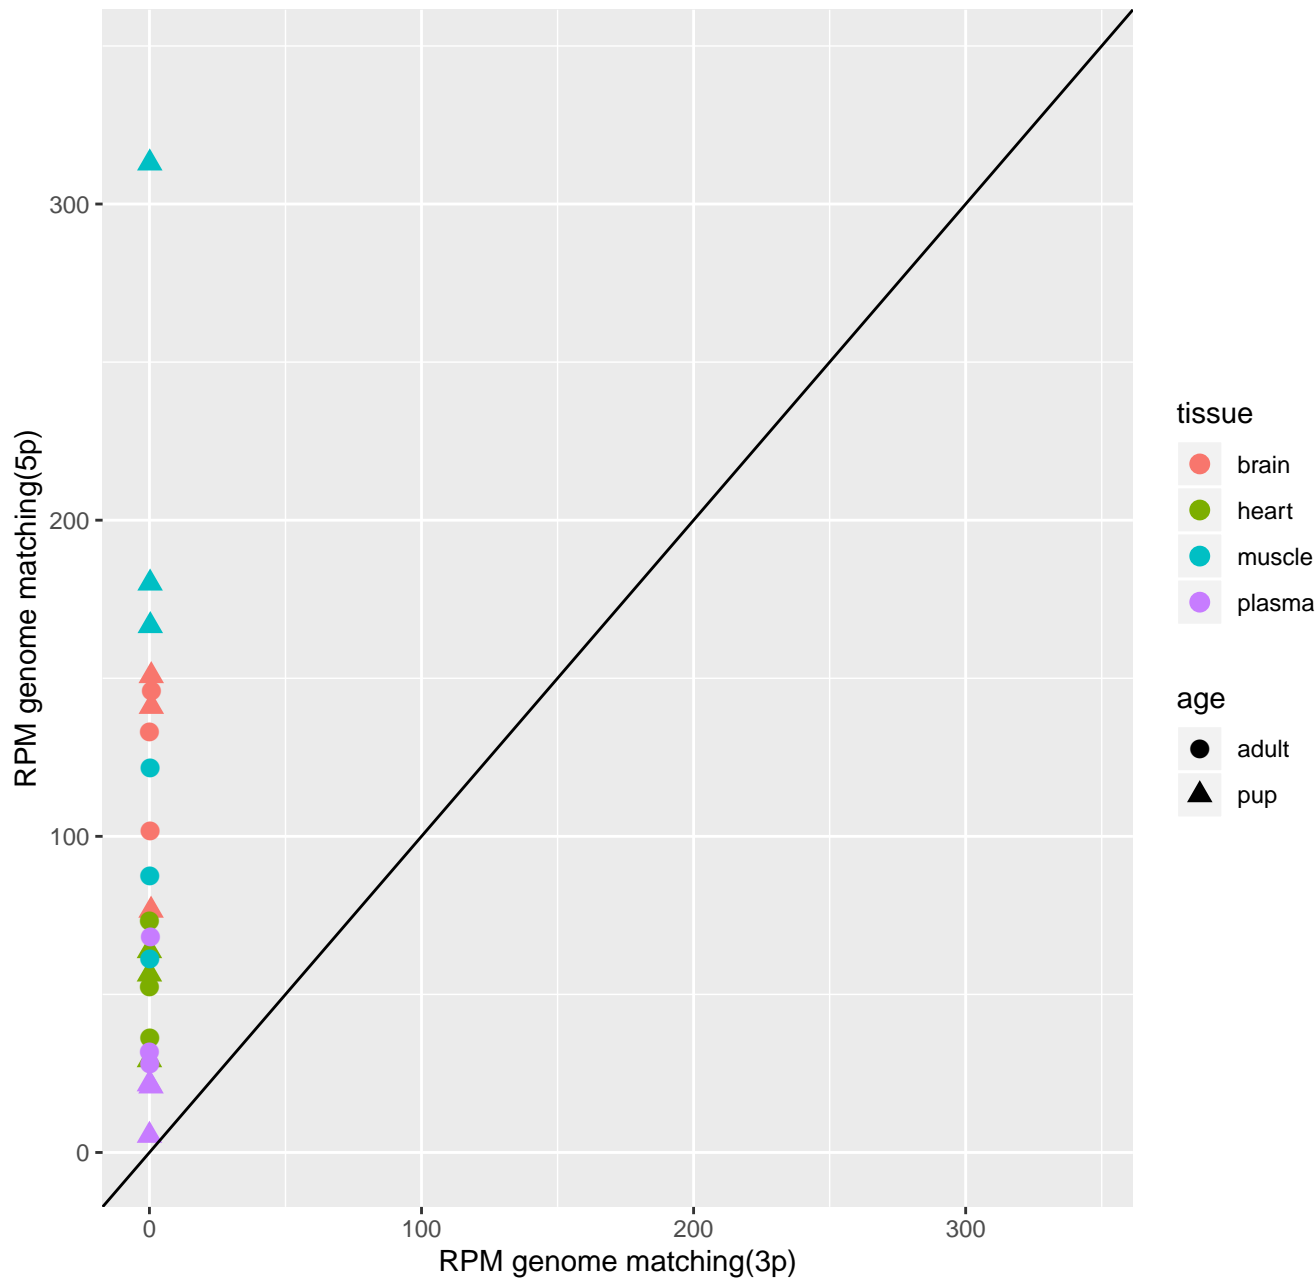

# lve-miR-500b\_loc3

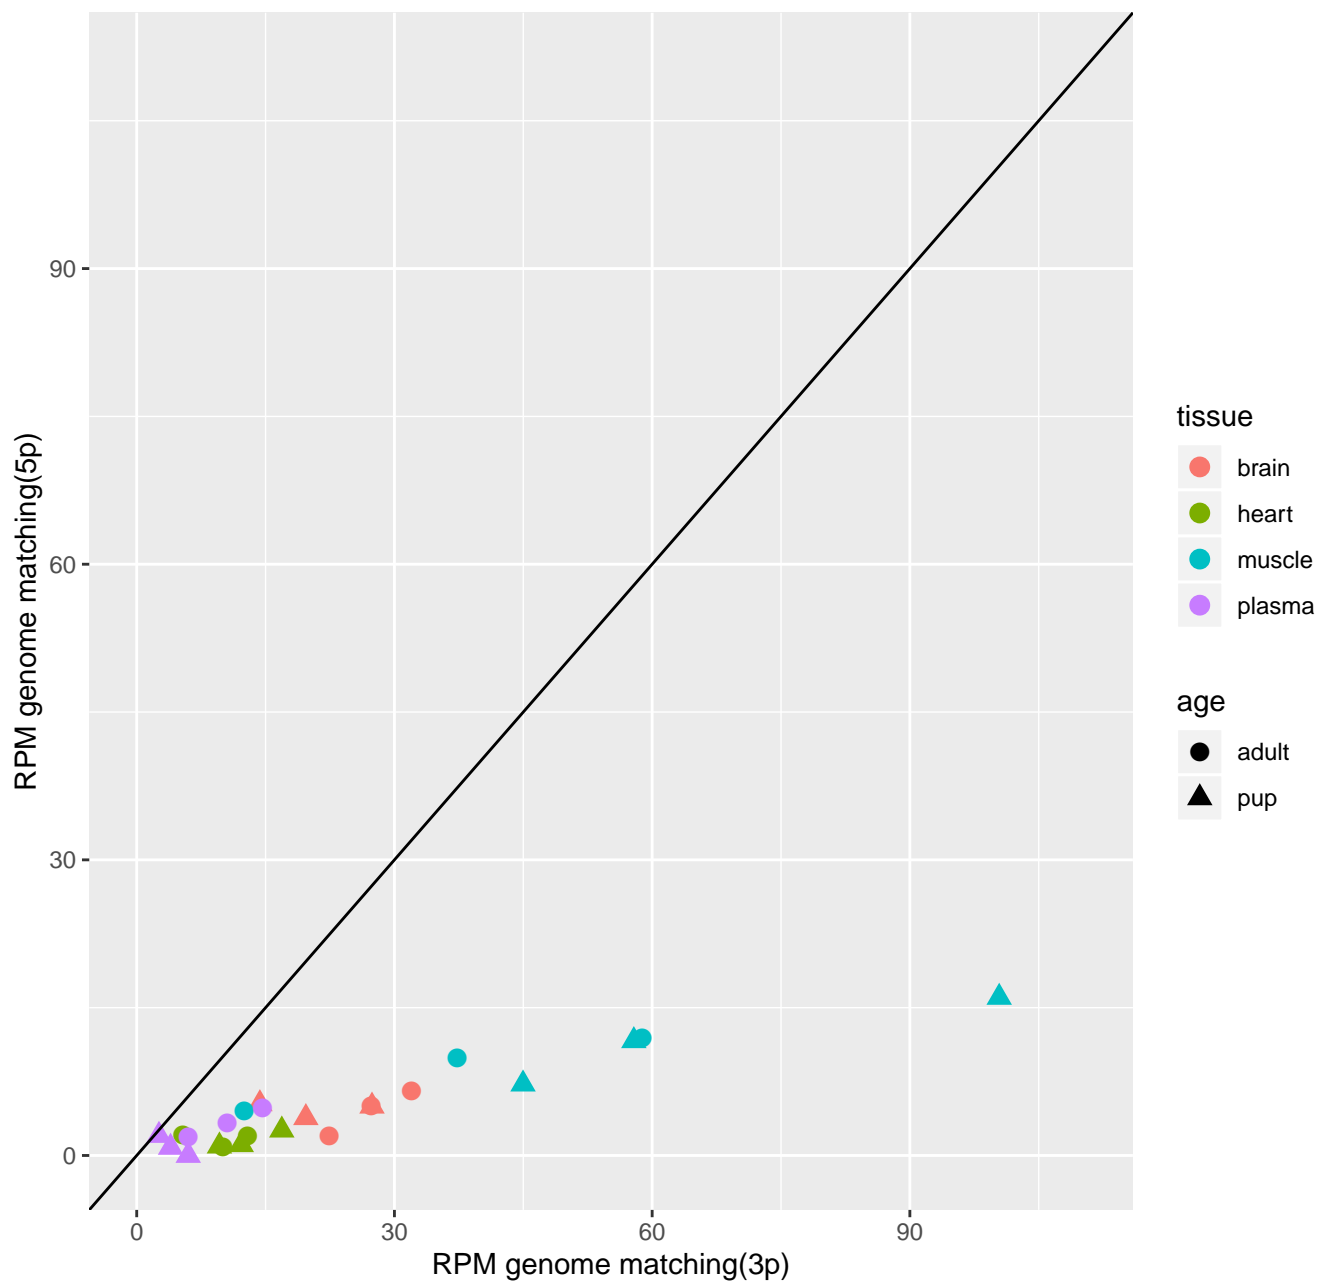



novel\_86

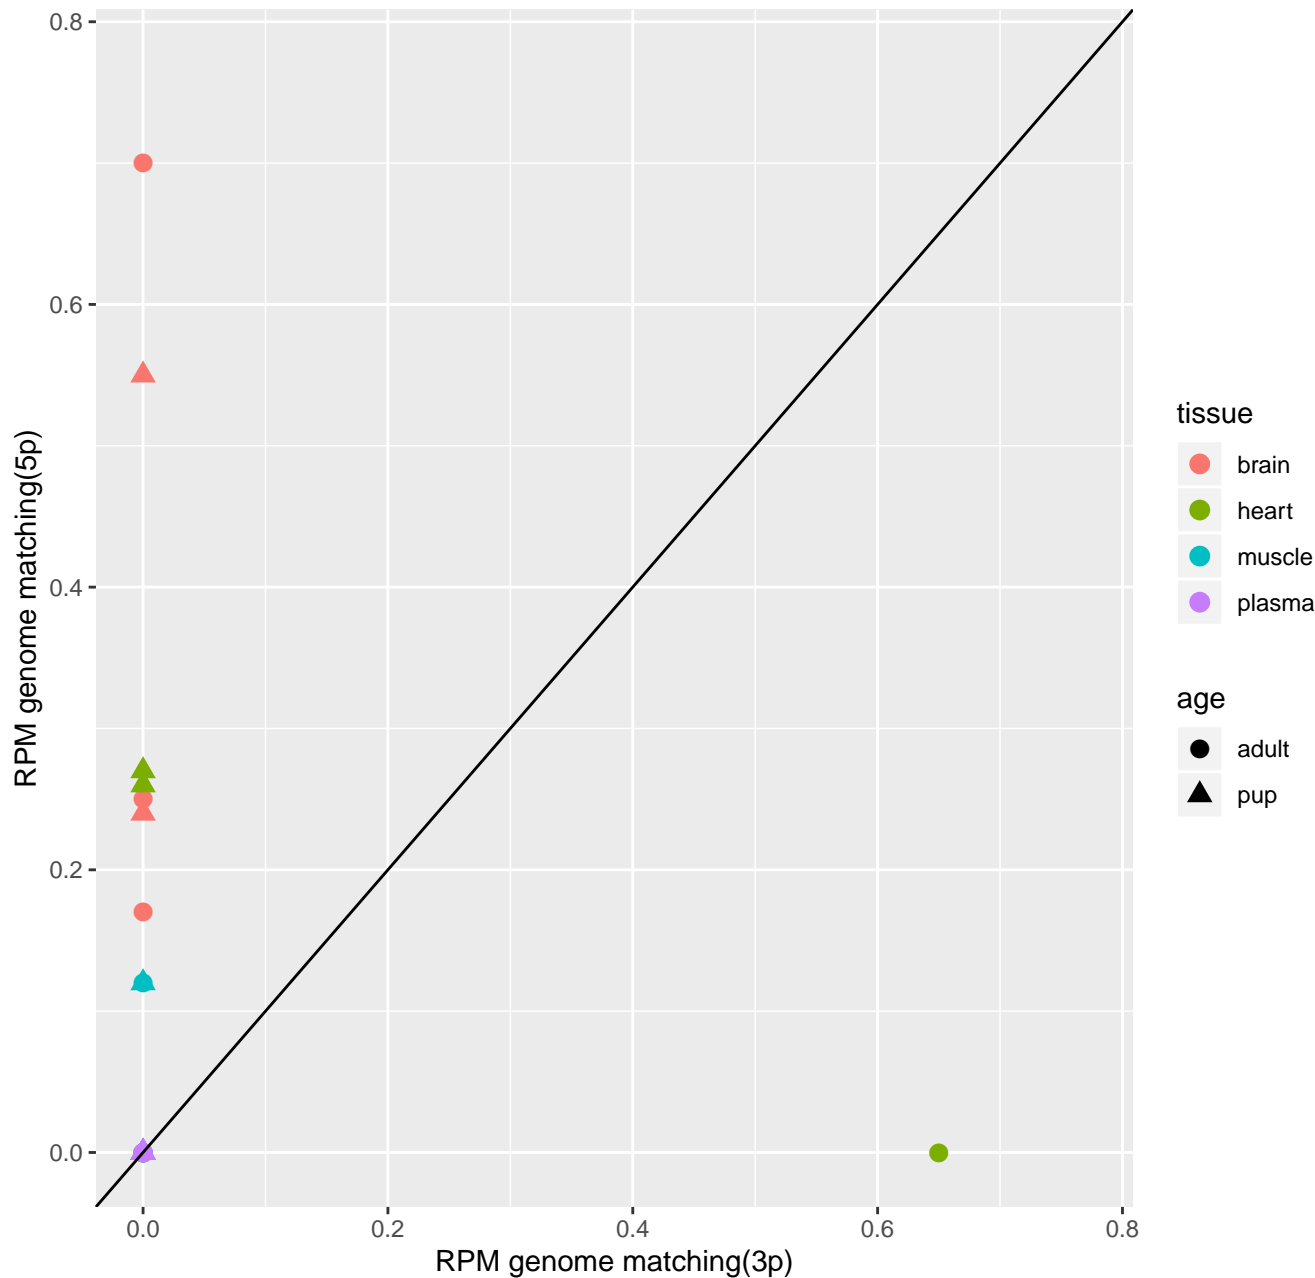

## lwe-miR-497\_loc1

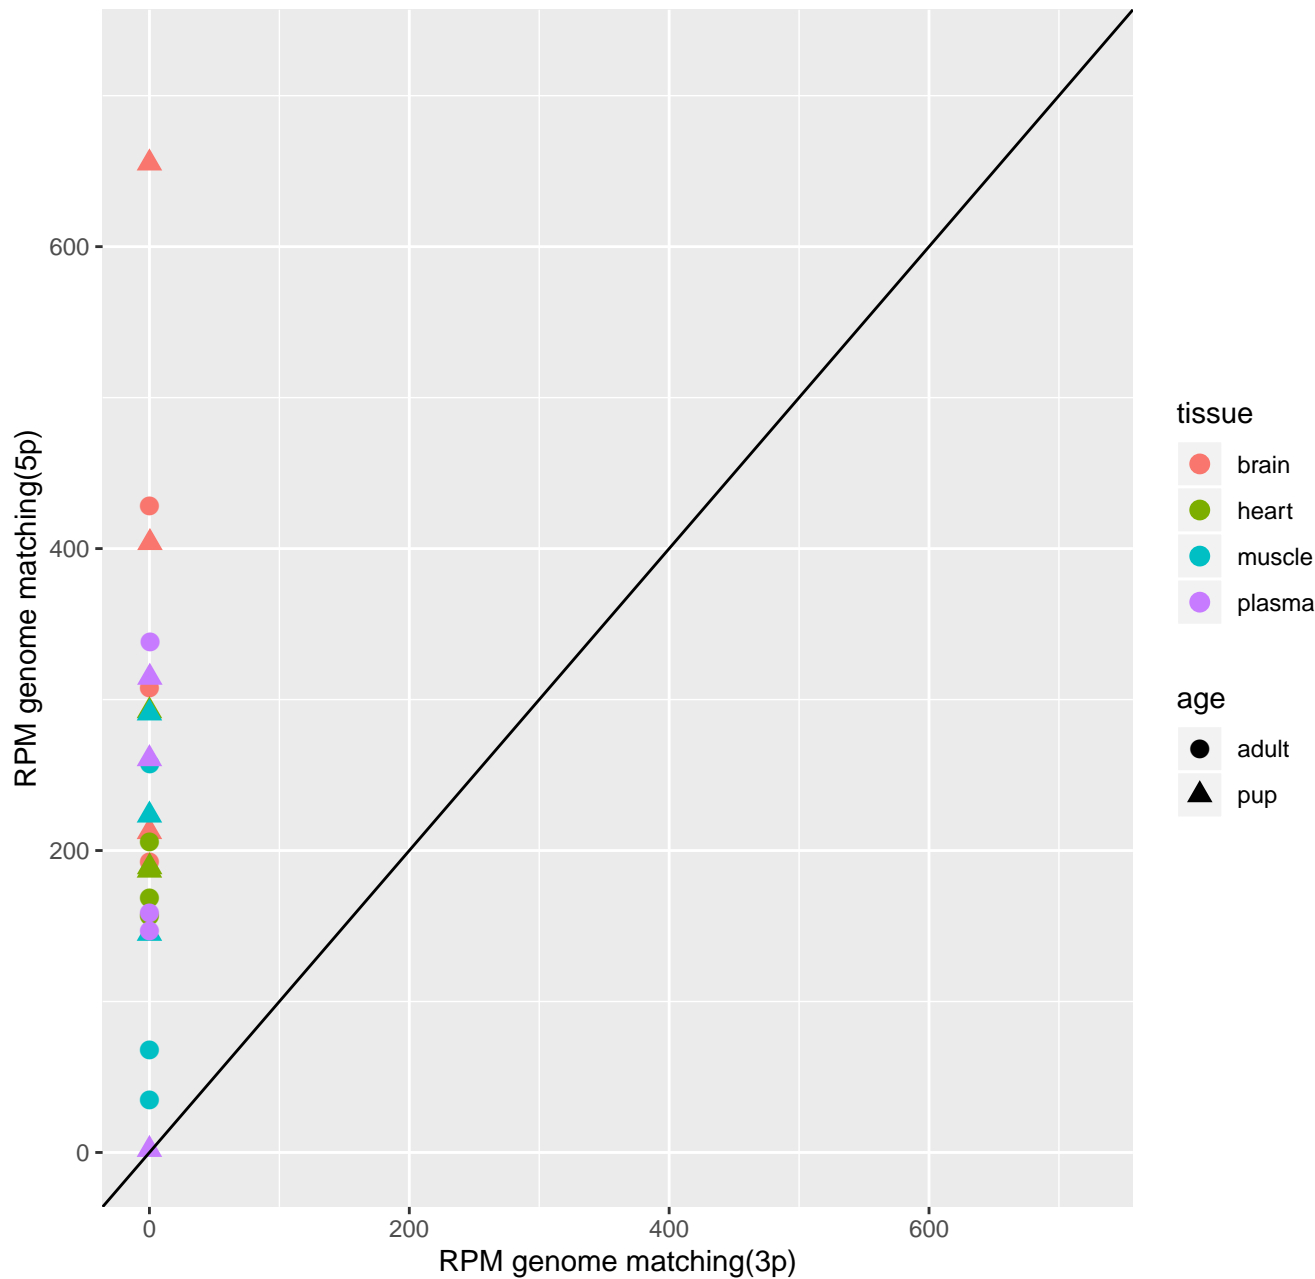



novel\_87

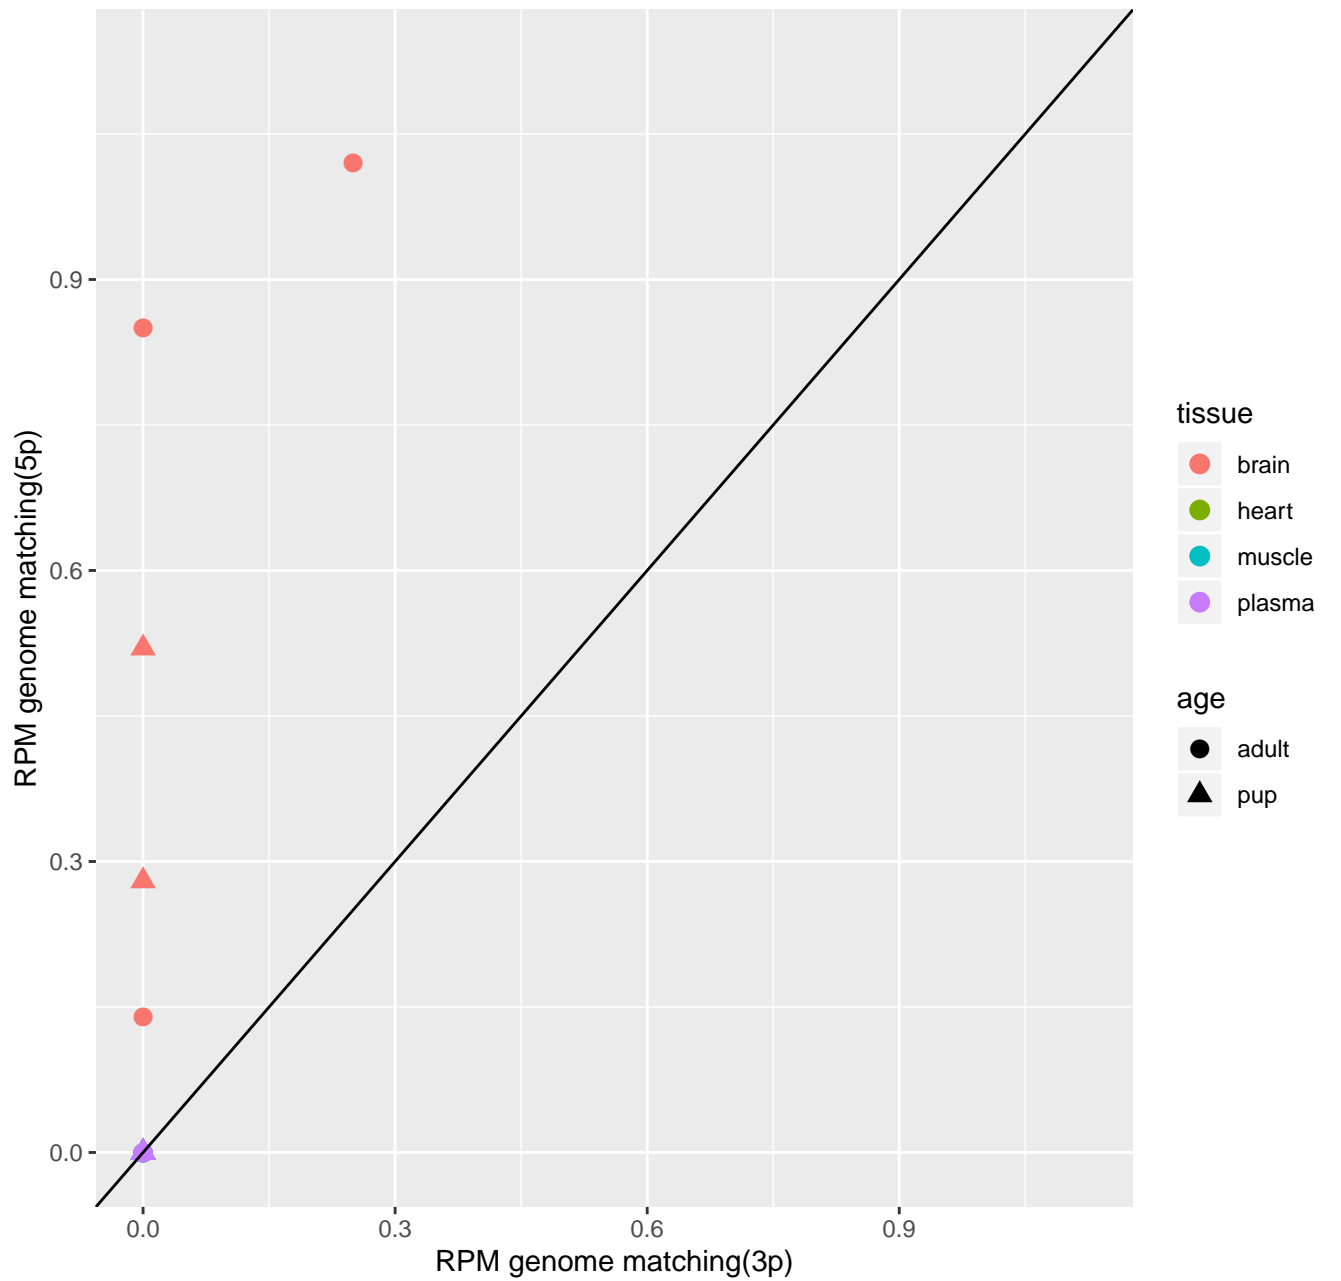

## novel\_88

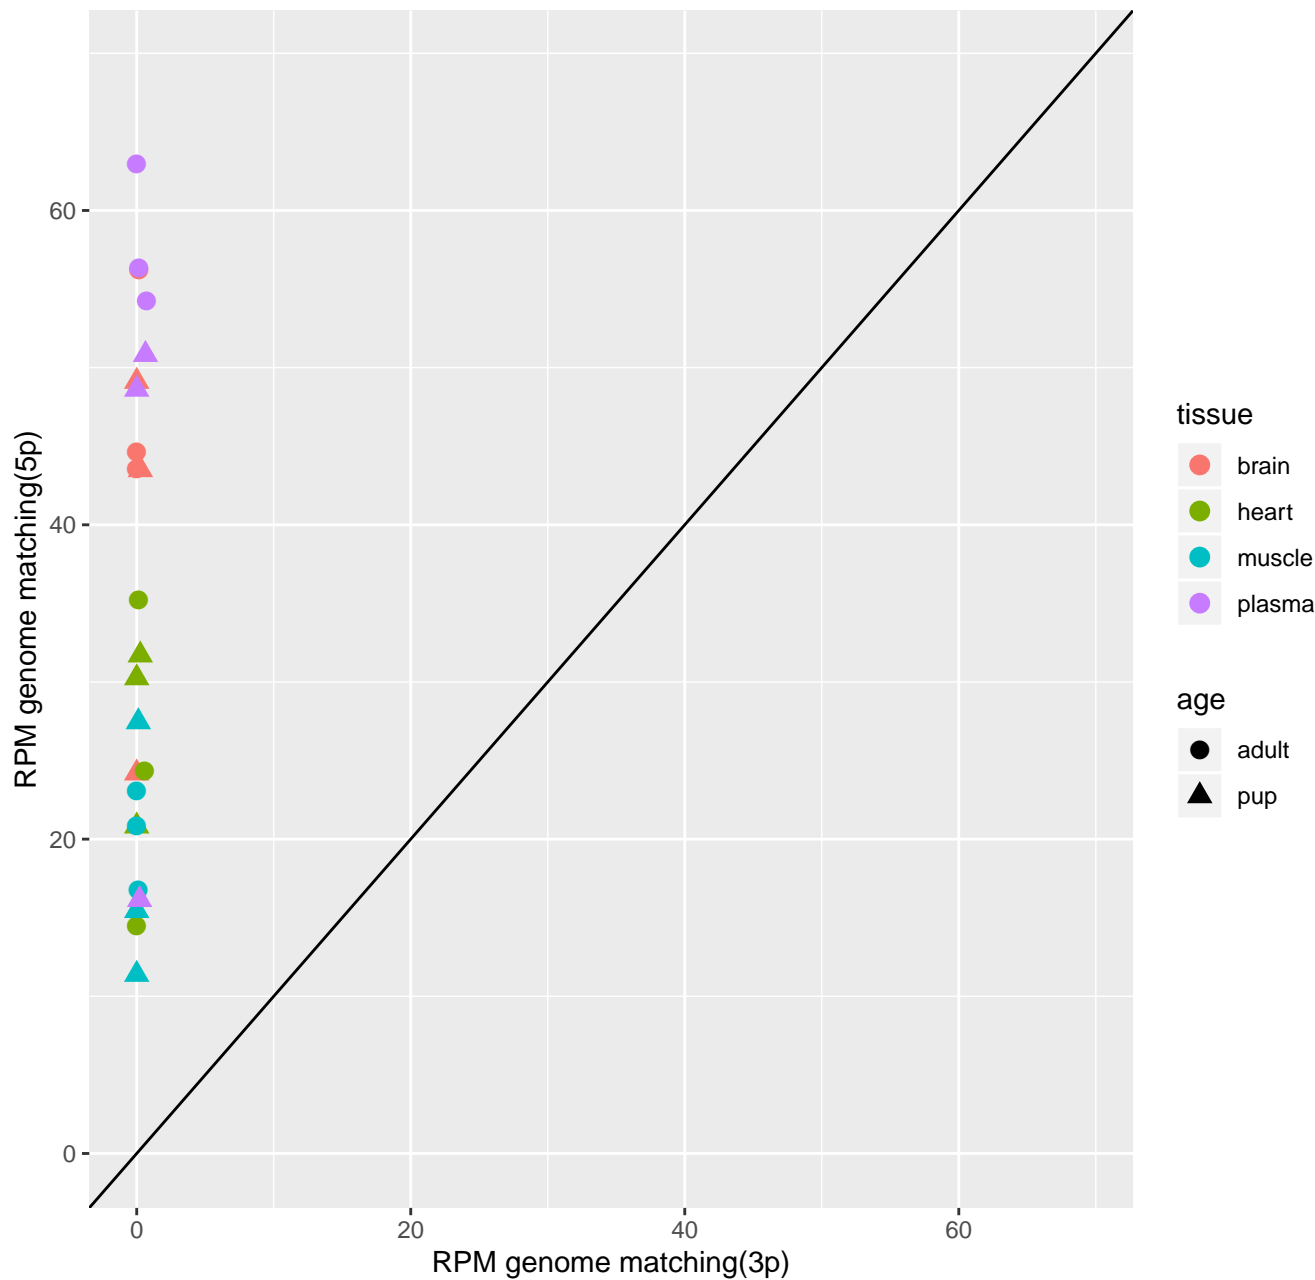

novel\_89

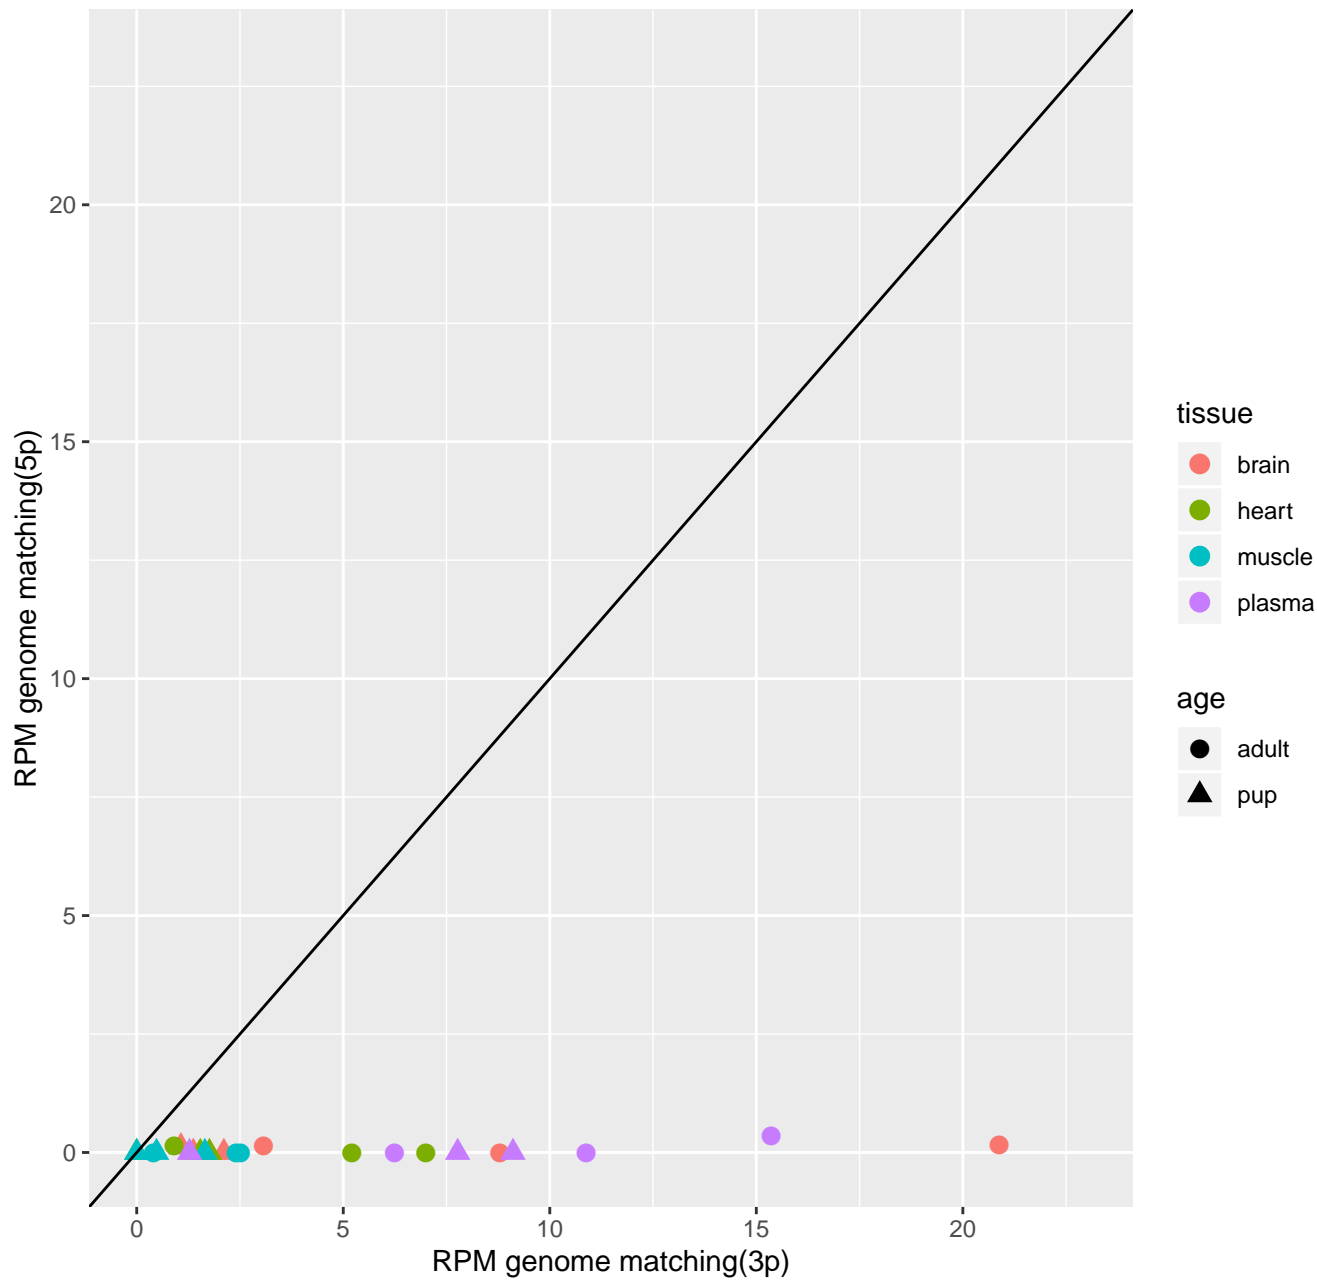

## lwe-miR-199a\_loc4

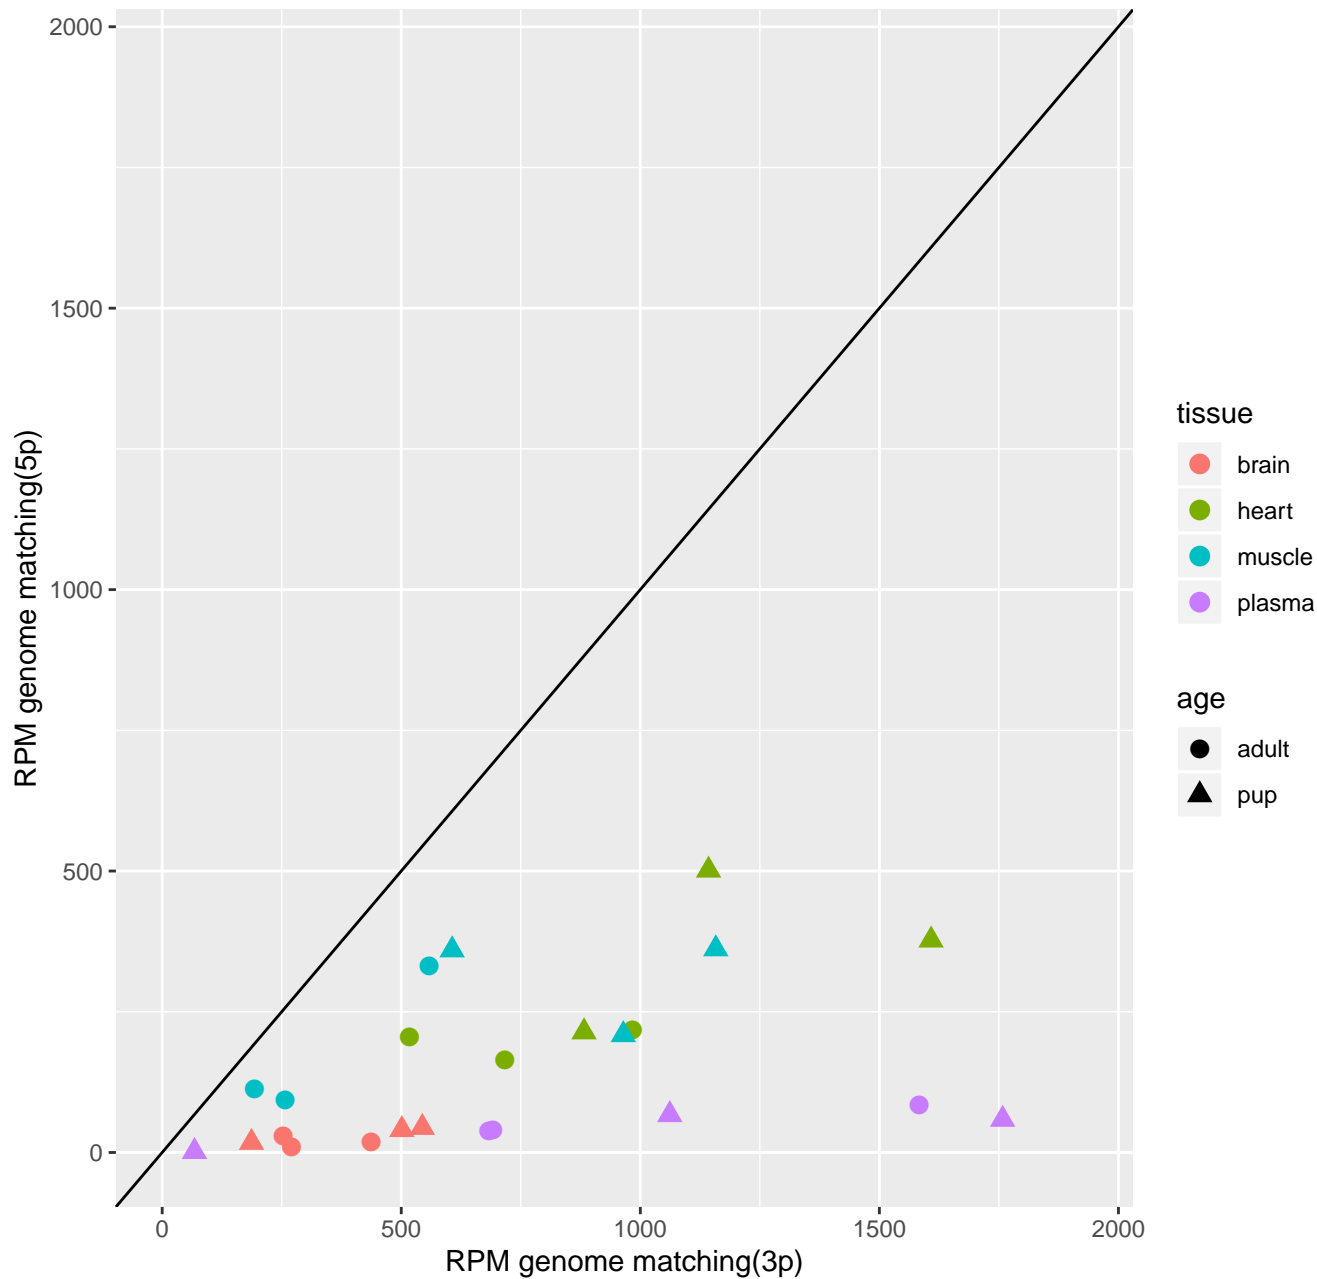





novel\_91

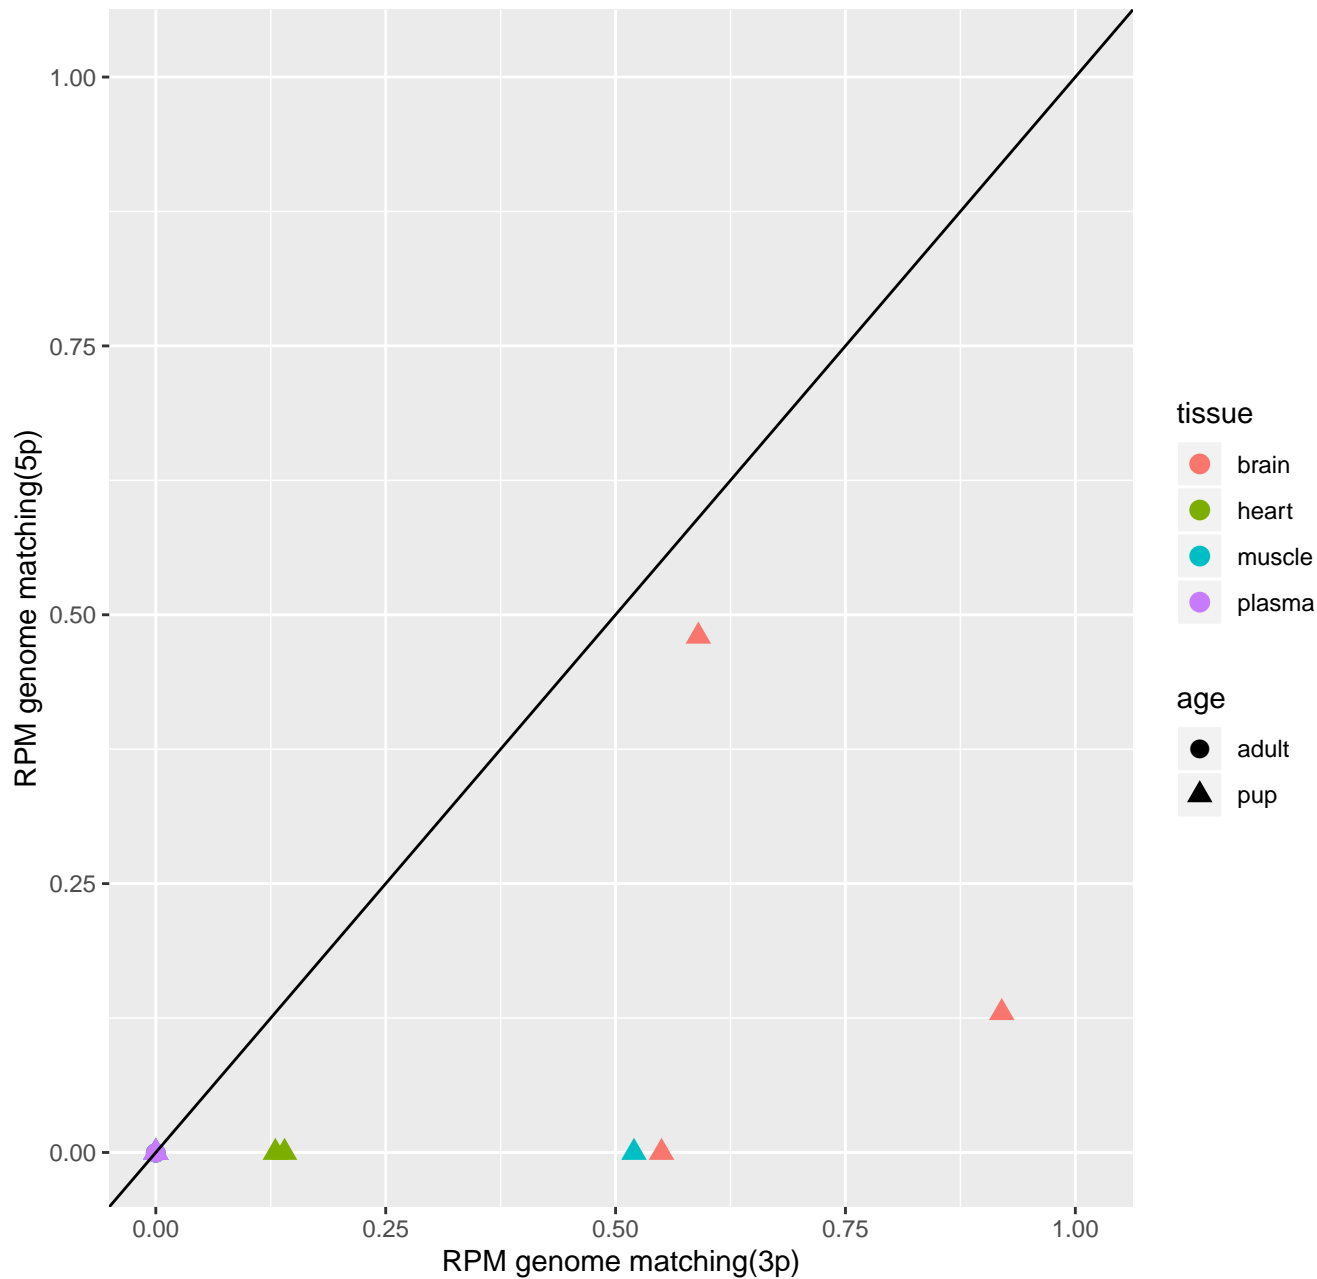

novel\_92

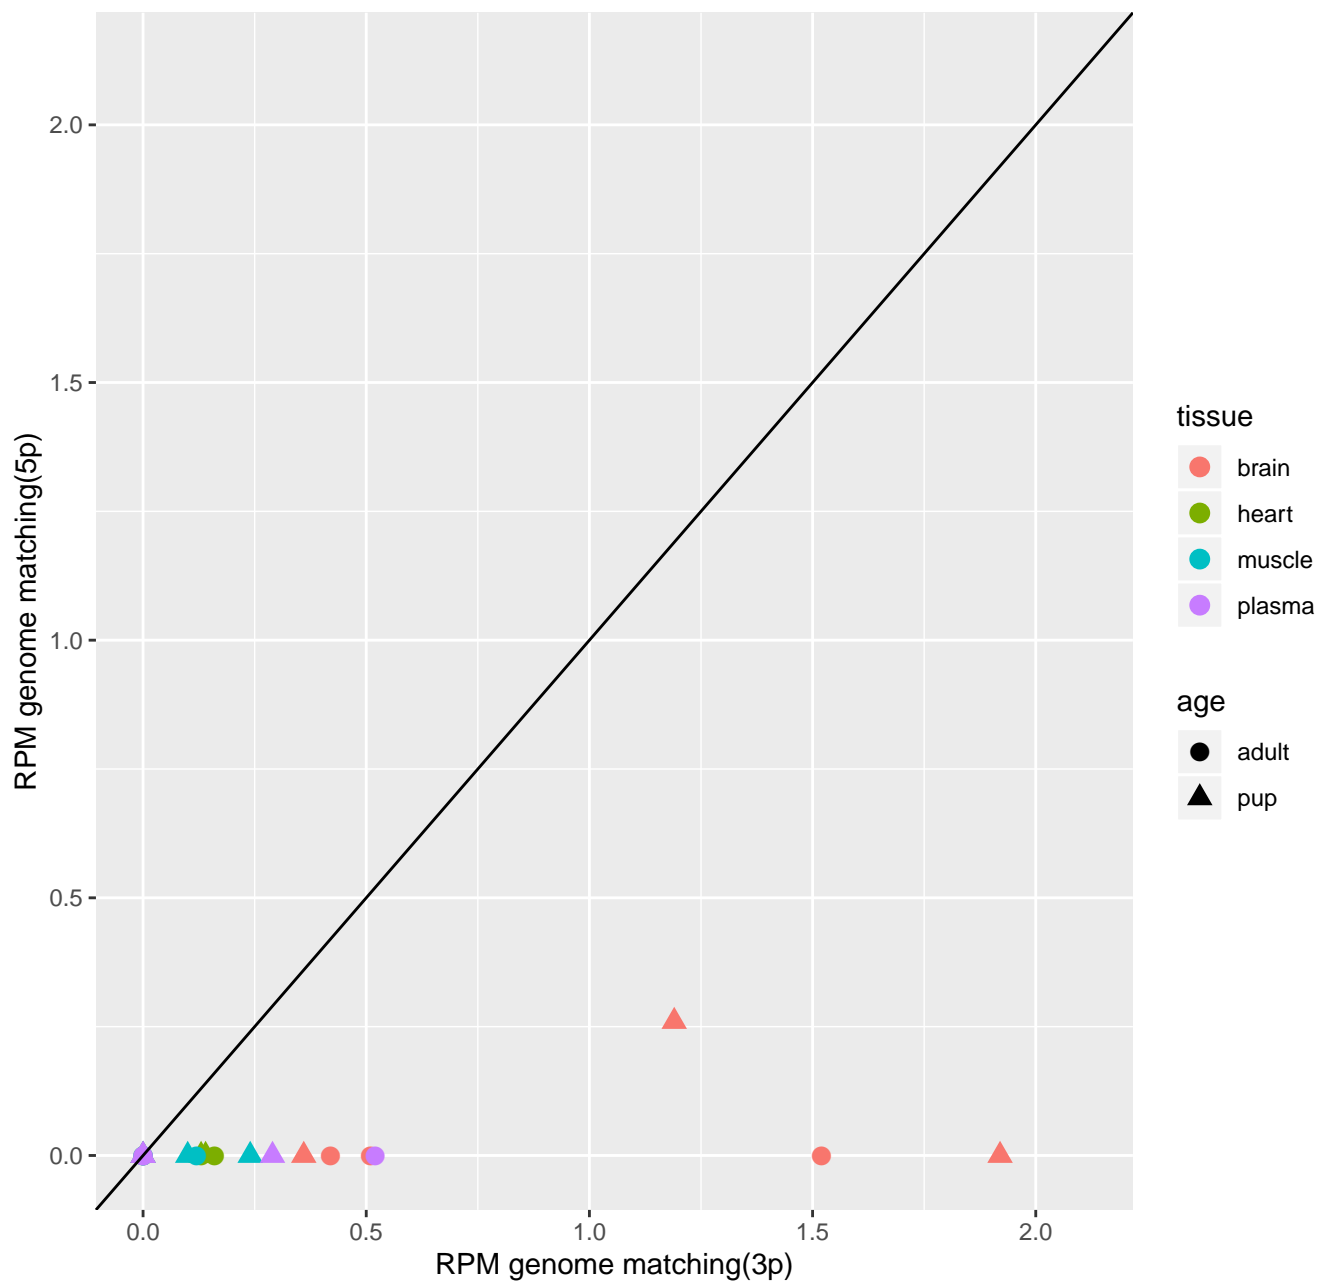

## lwe-miR-205a\_loc1

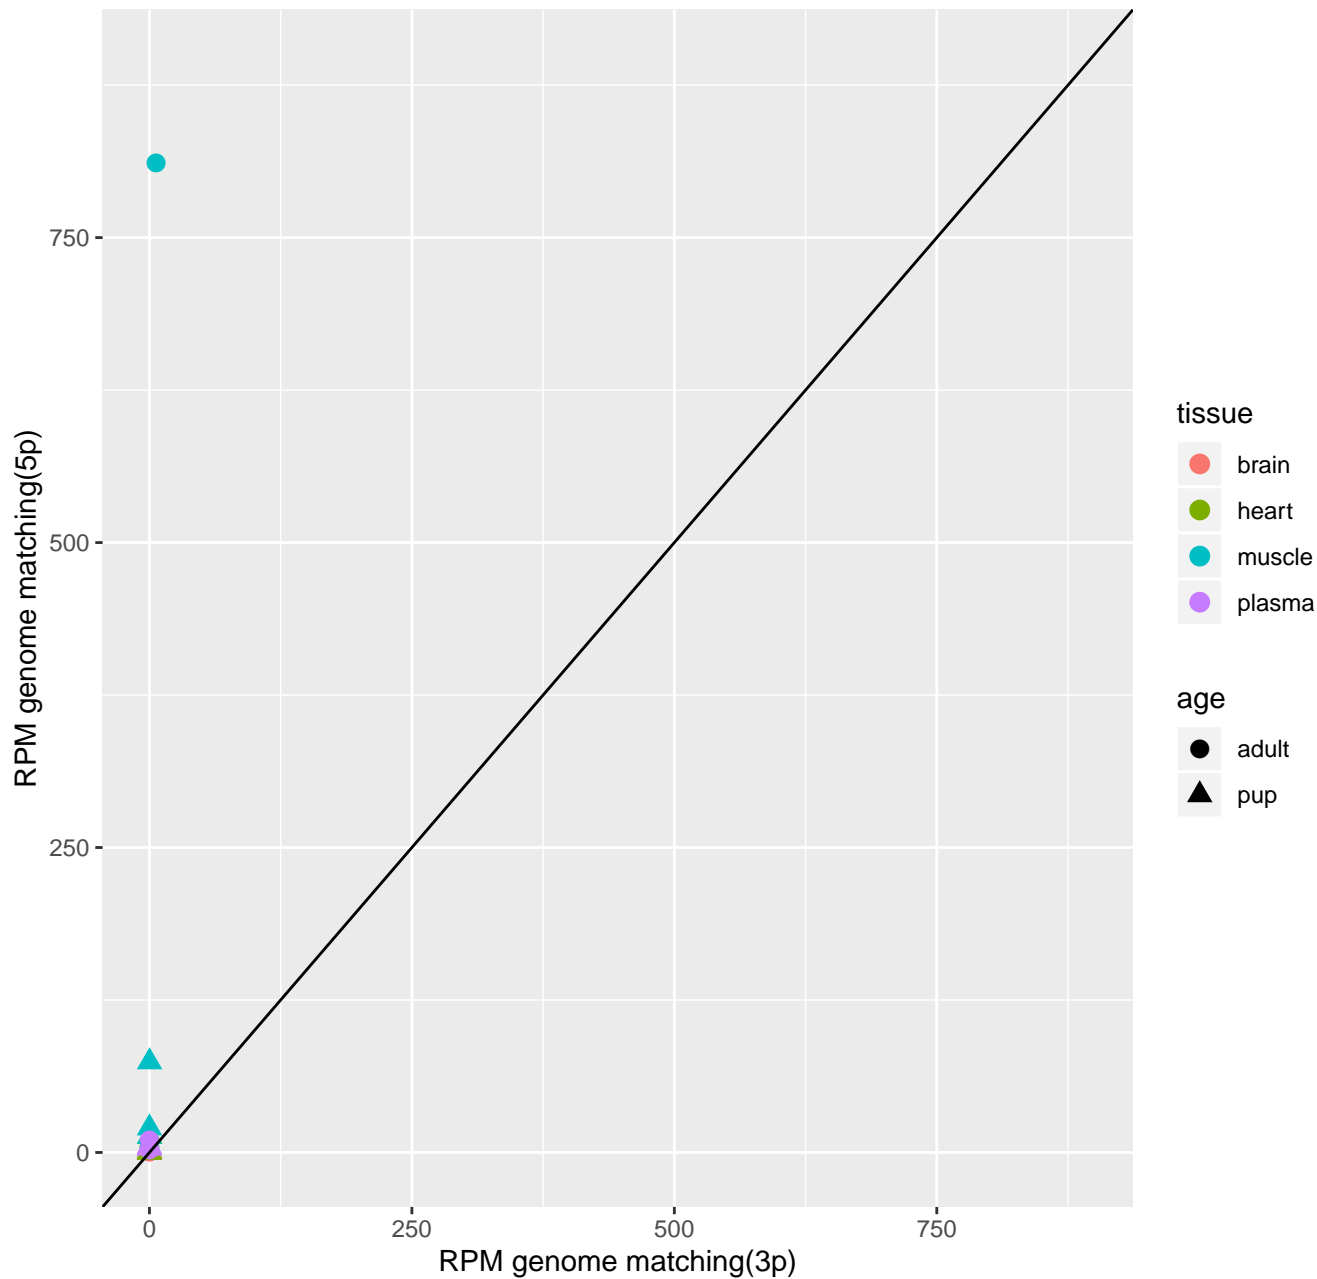

novel\_93

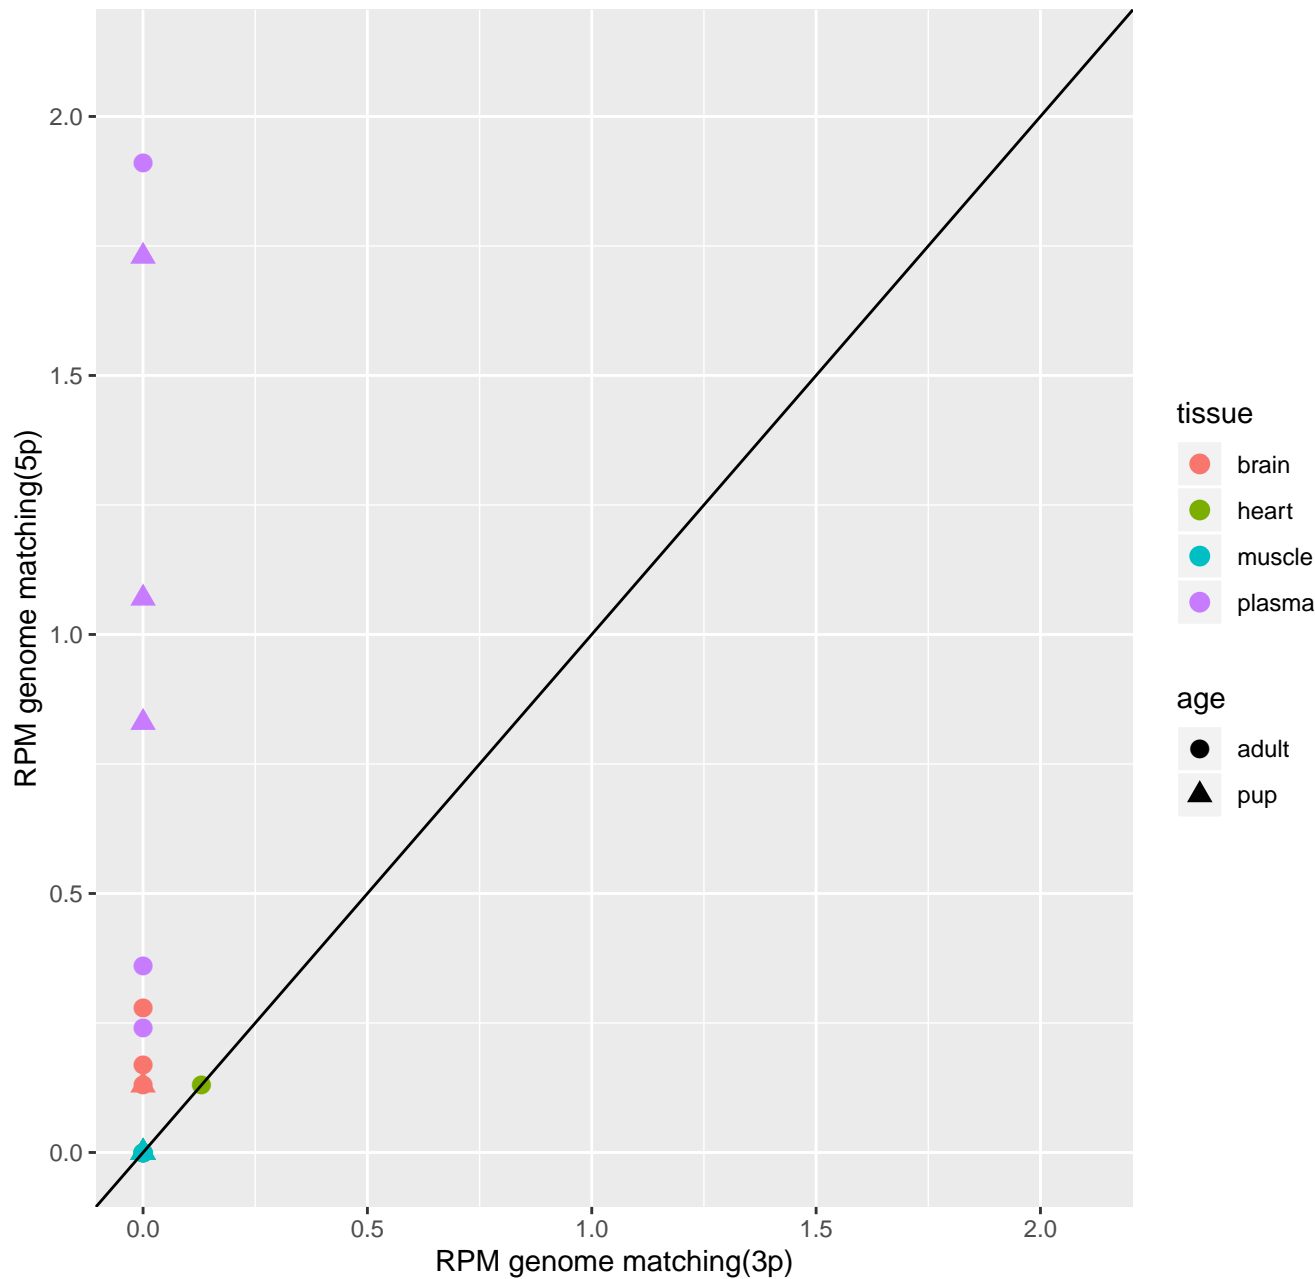

## novel\_94

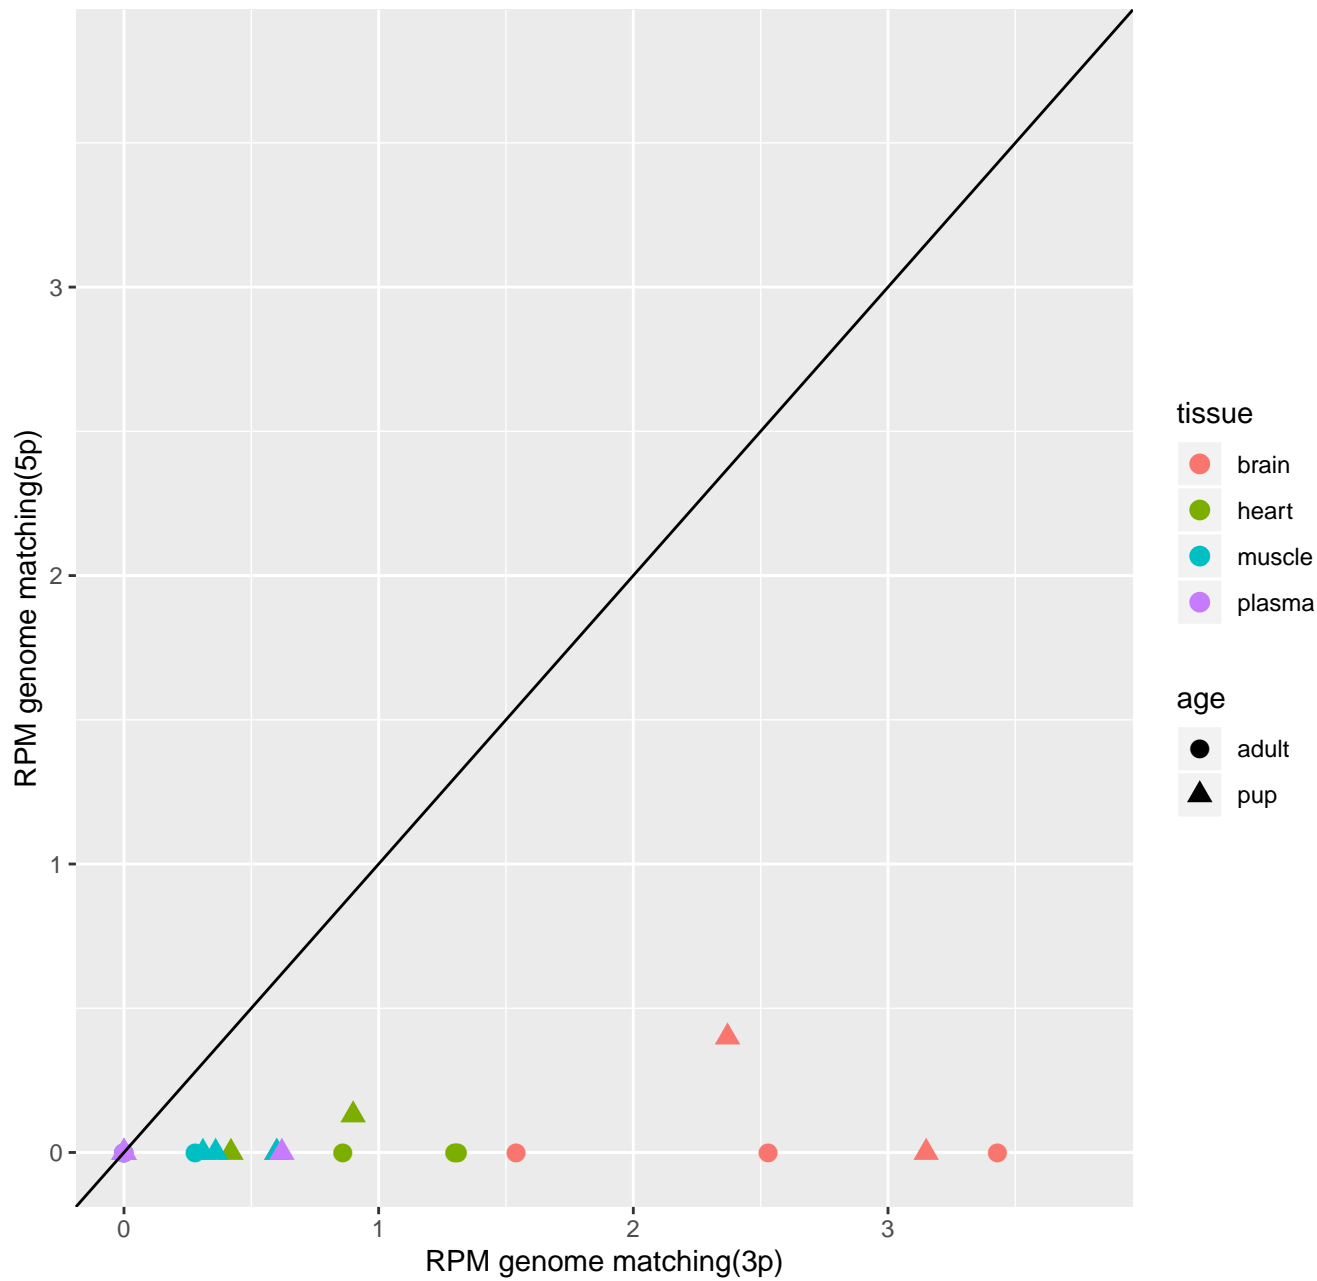

## lwe-miR-424\_loc1

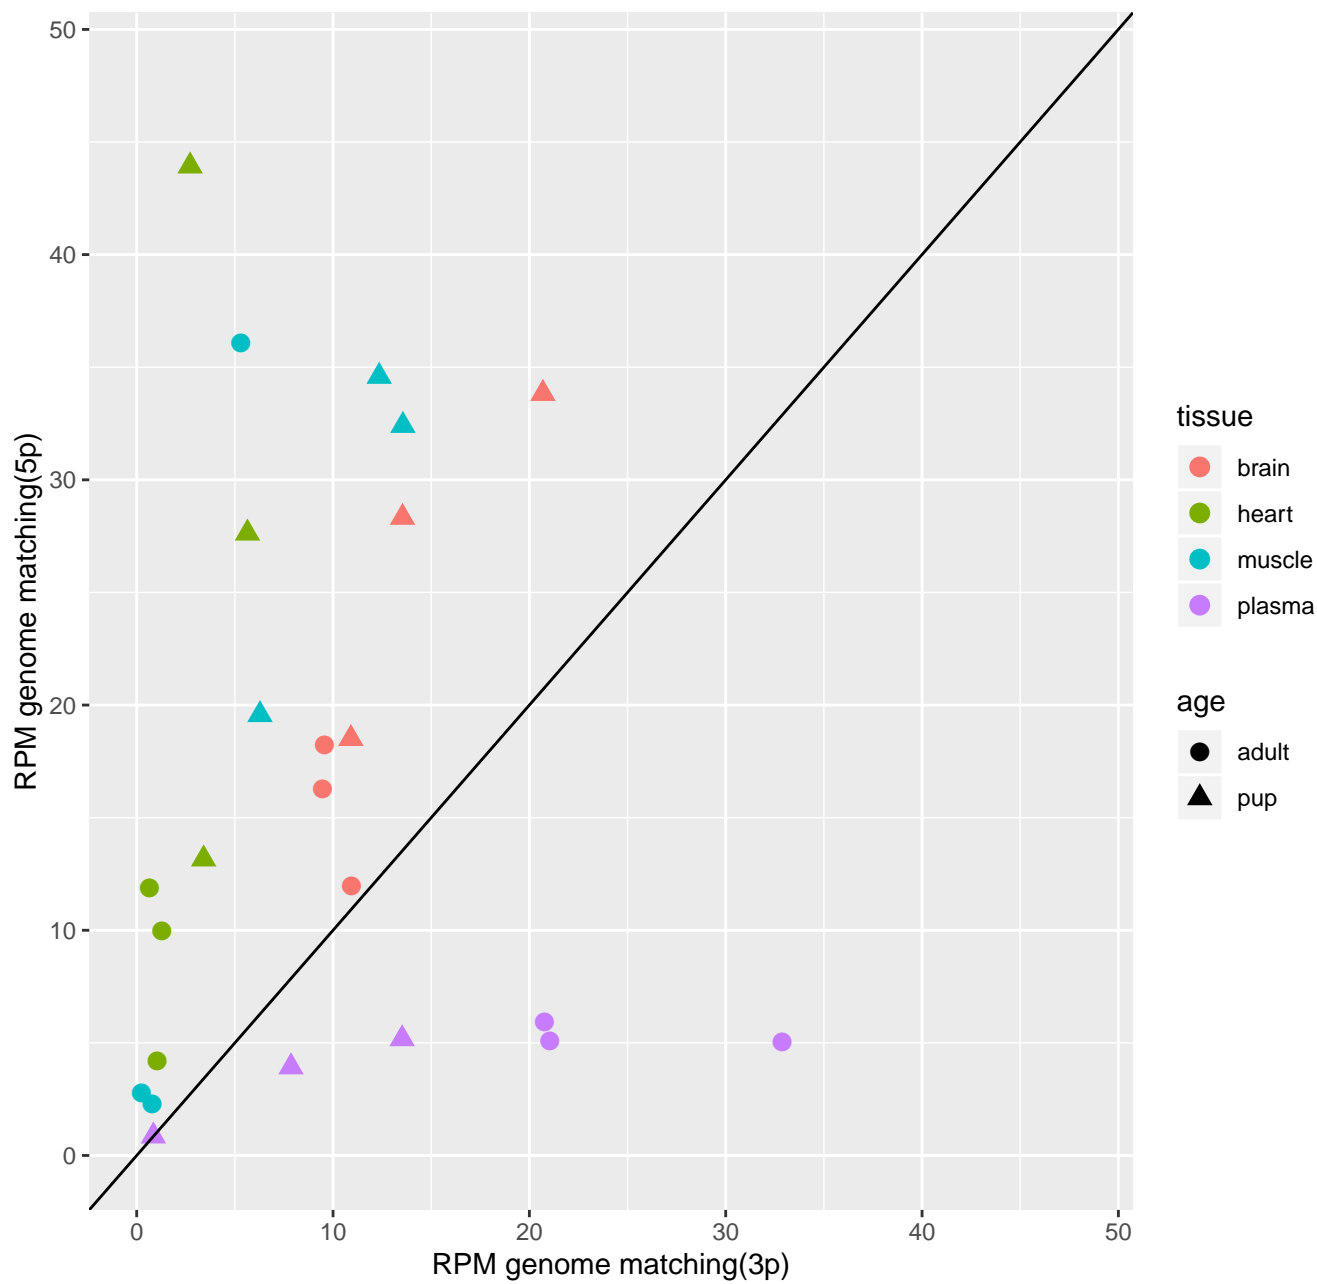

## lwe-miR-503\_loc1

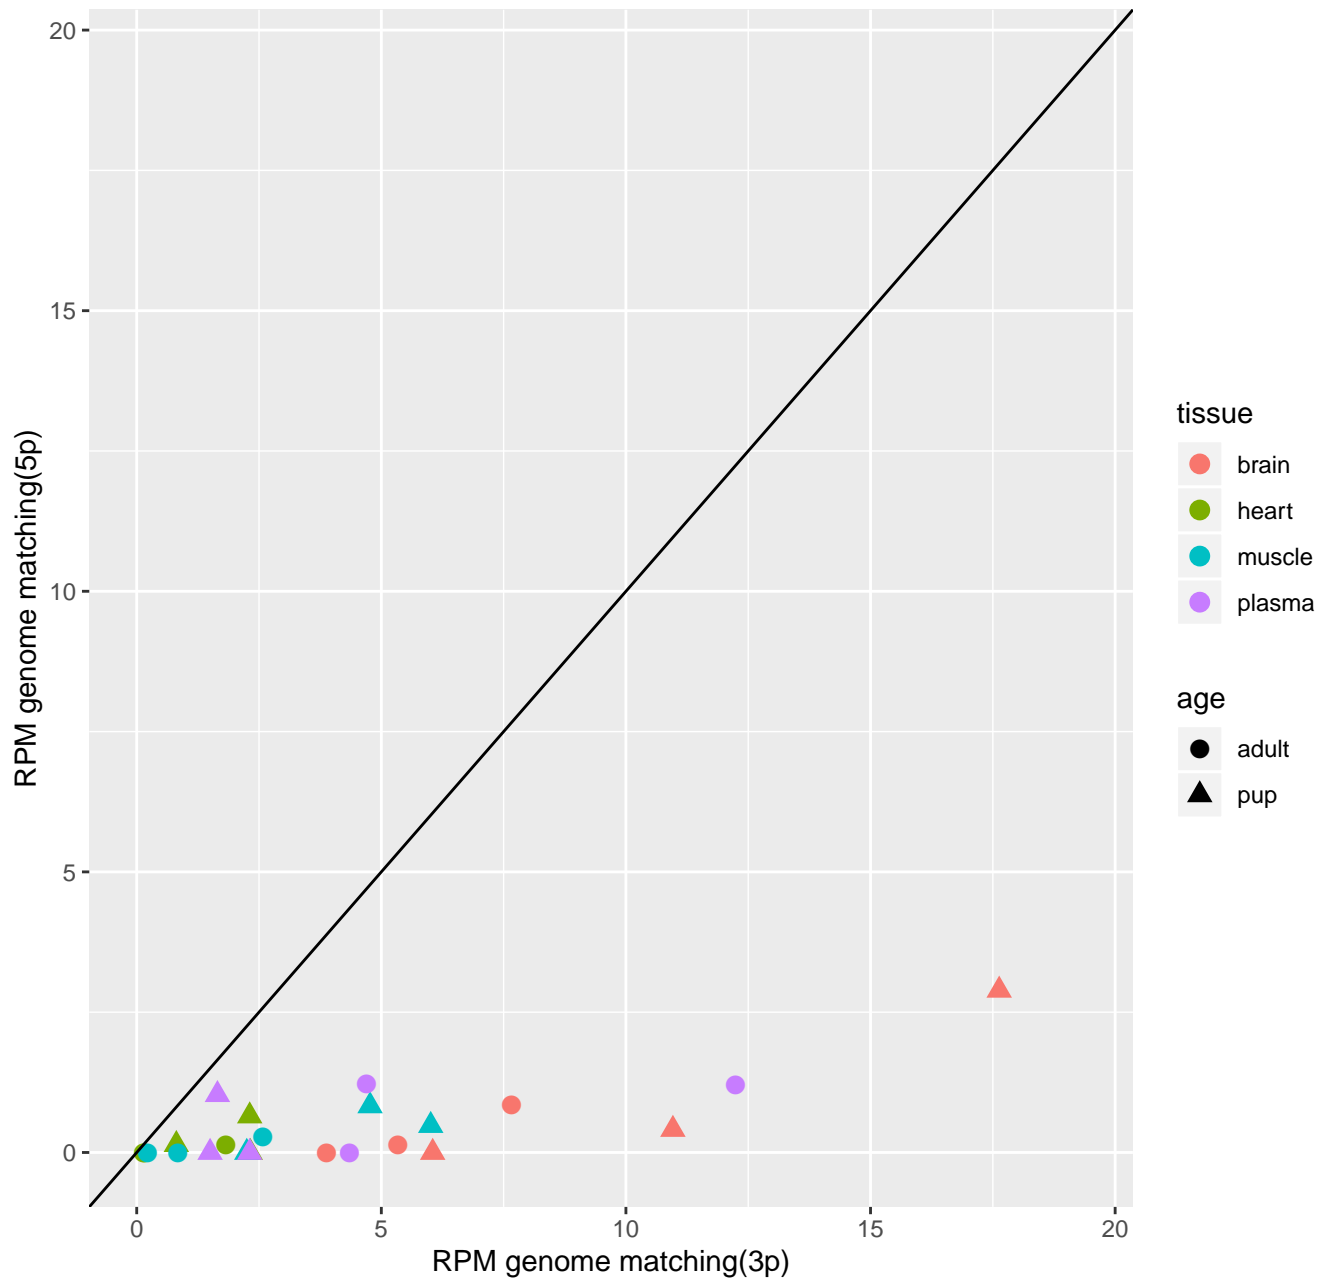

## lwe-miR-542\_loc1

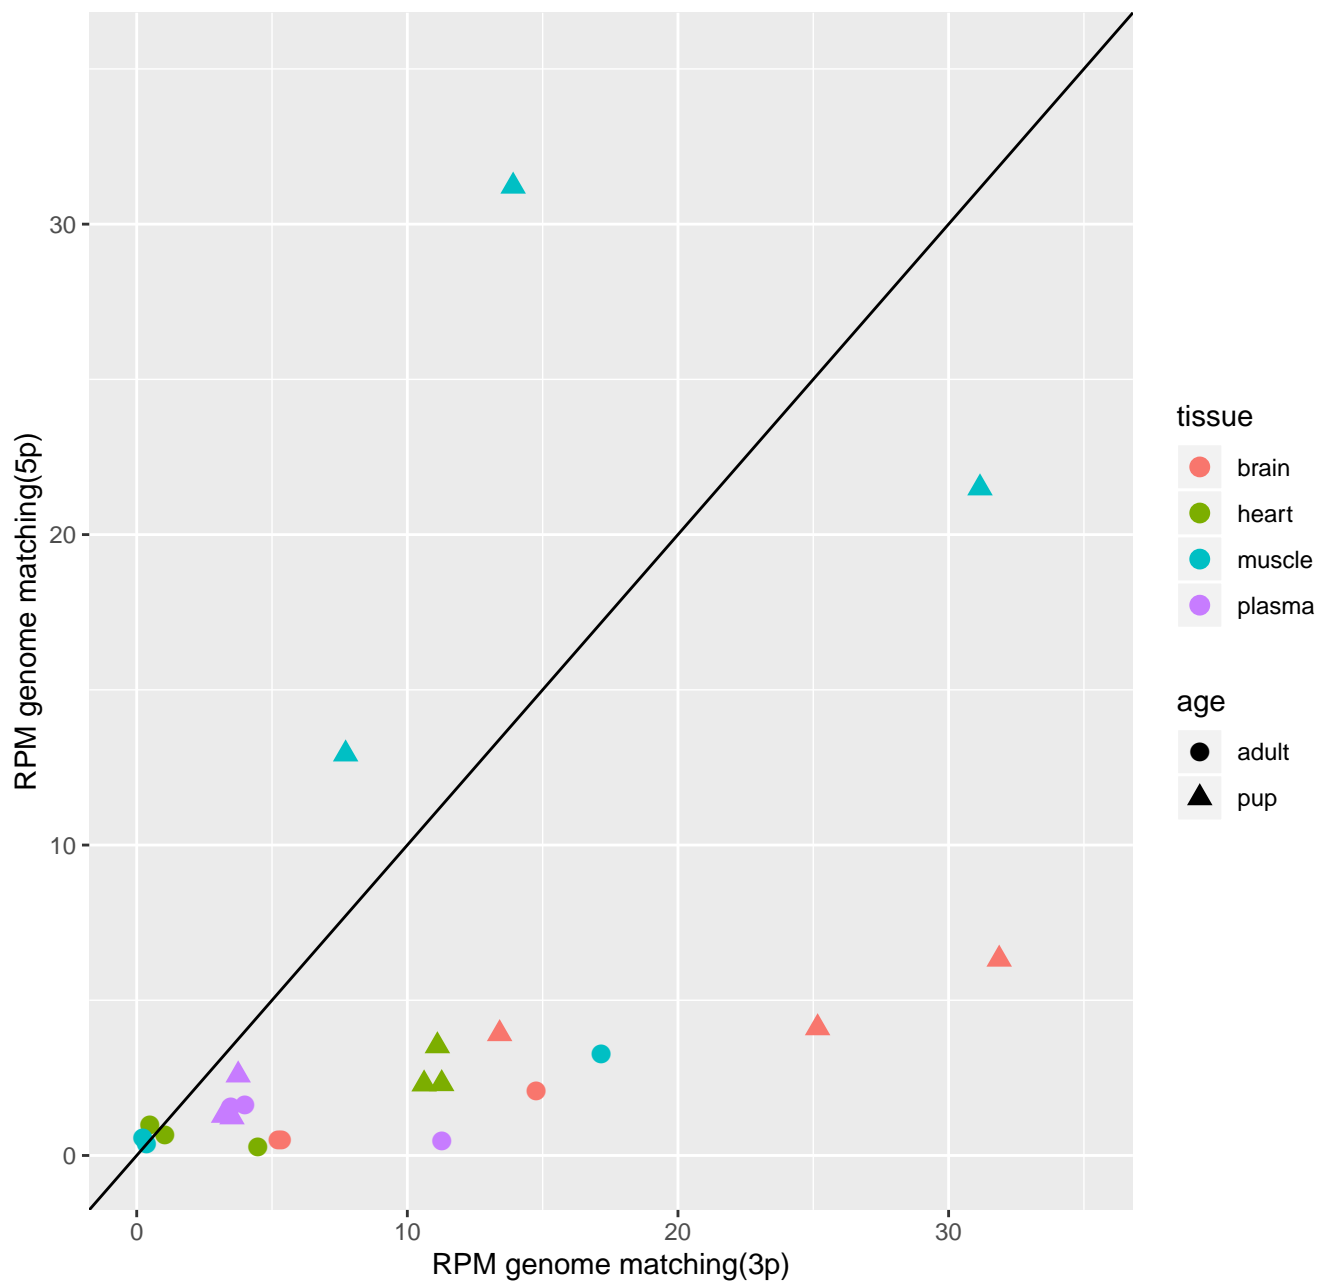



## lwe-miR-450\_loc1

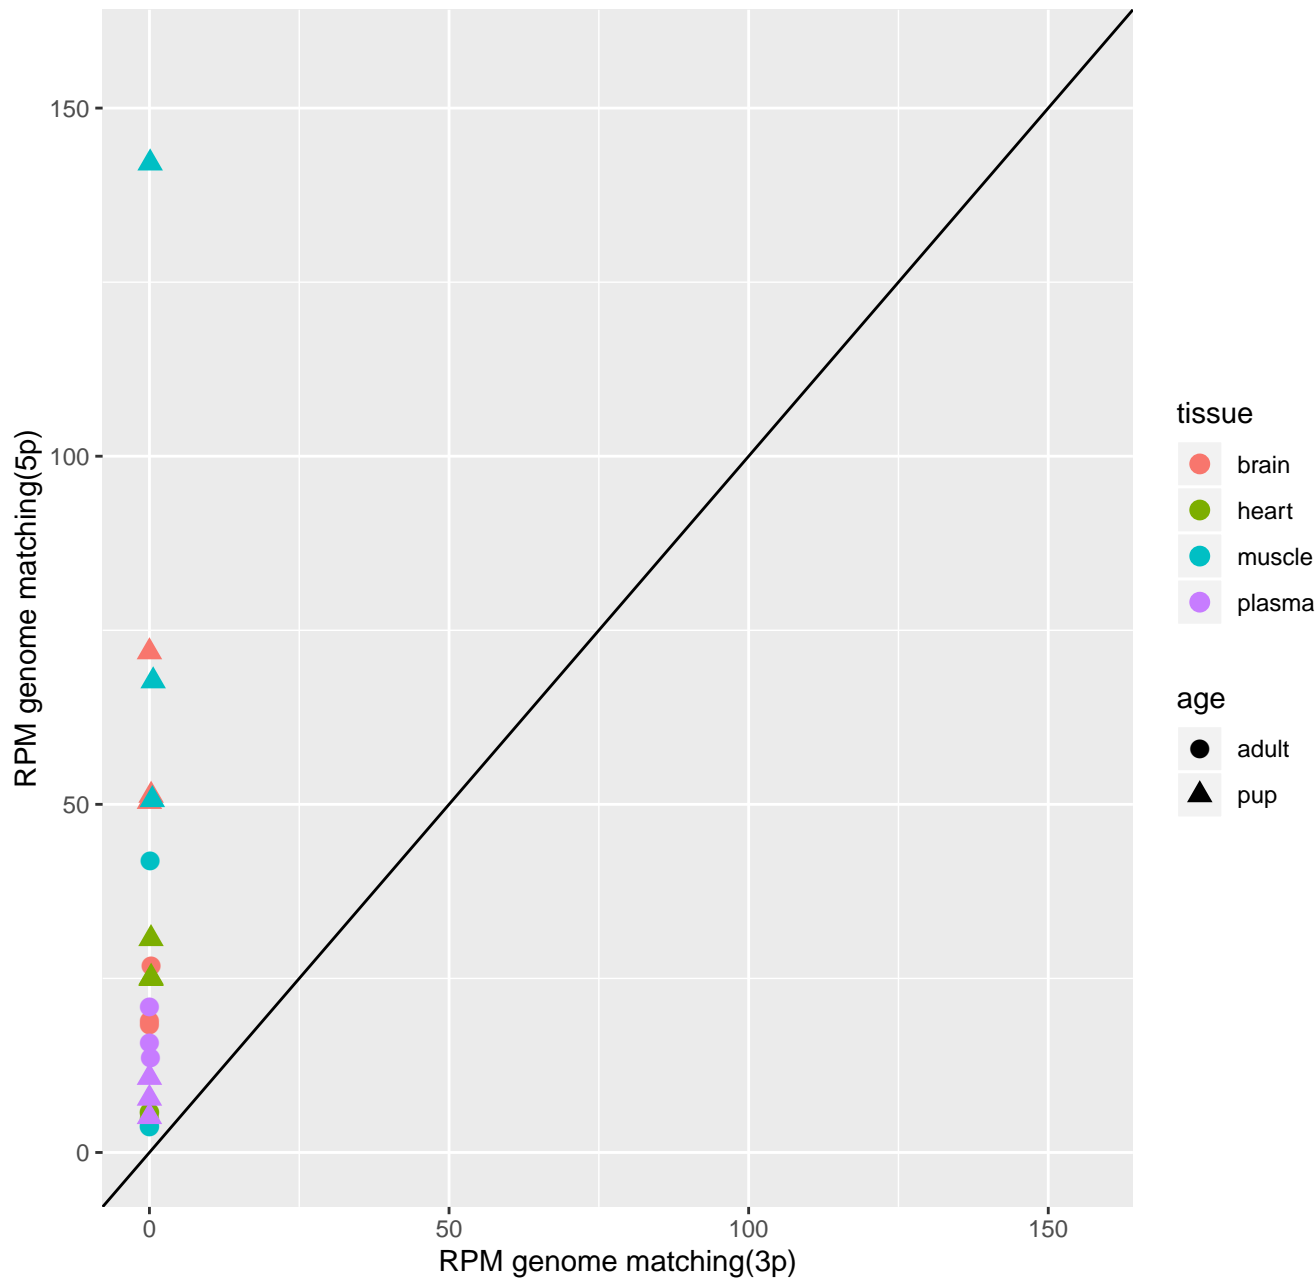

## lwe-miR-450\_loc2

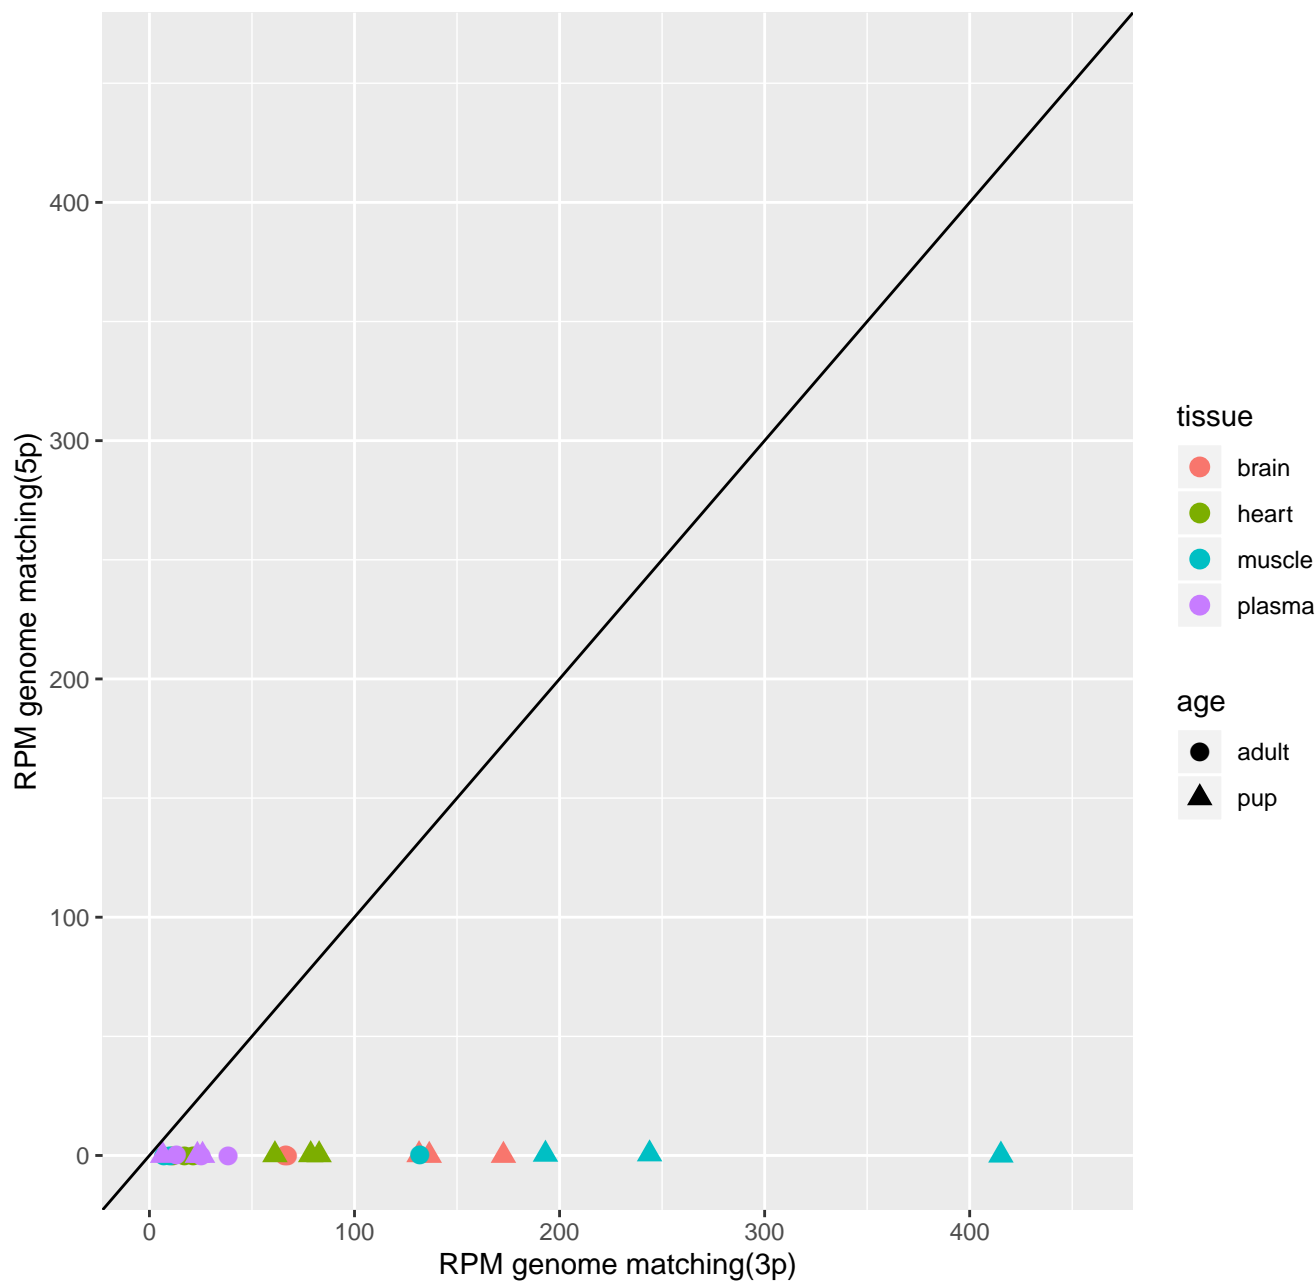

## lwe-miR-106\_loc1

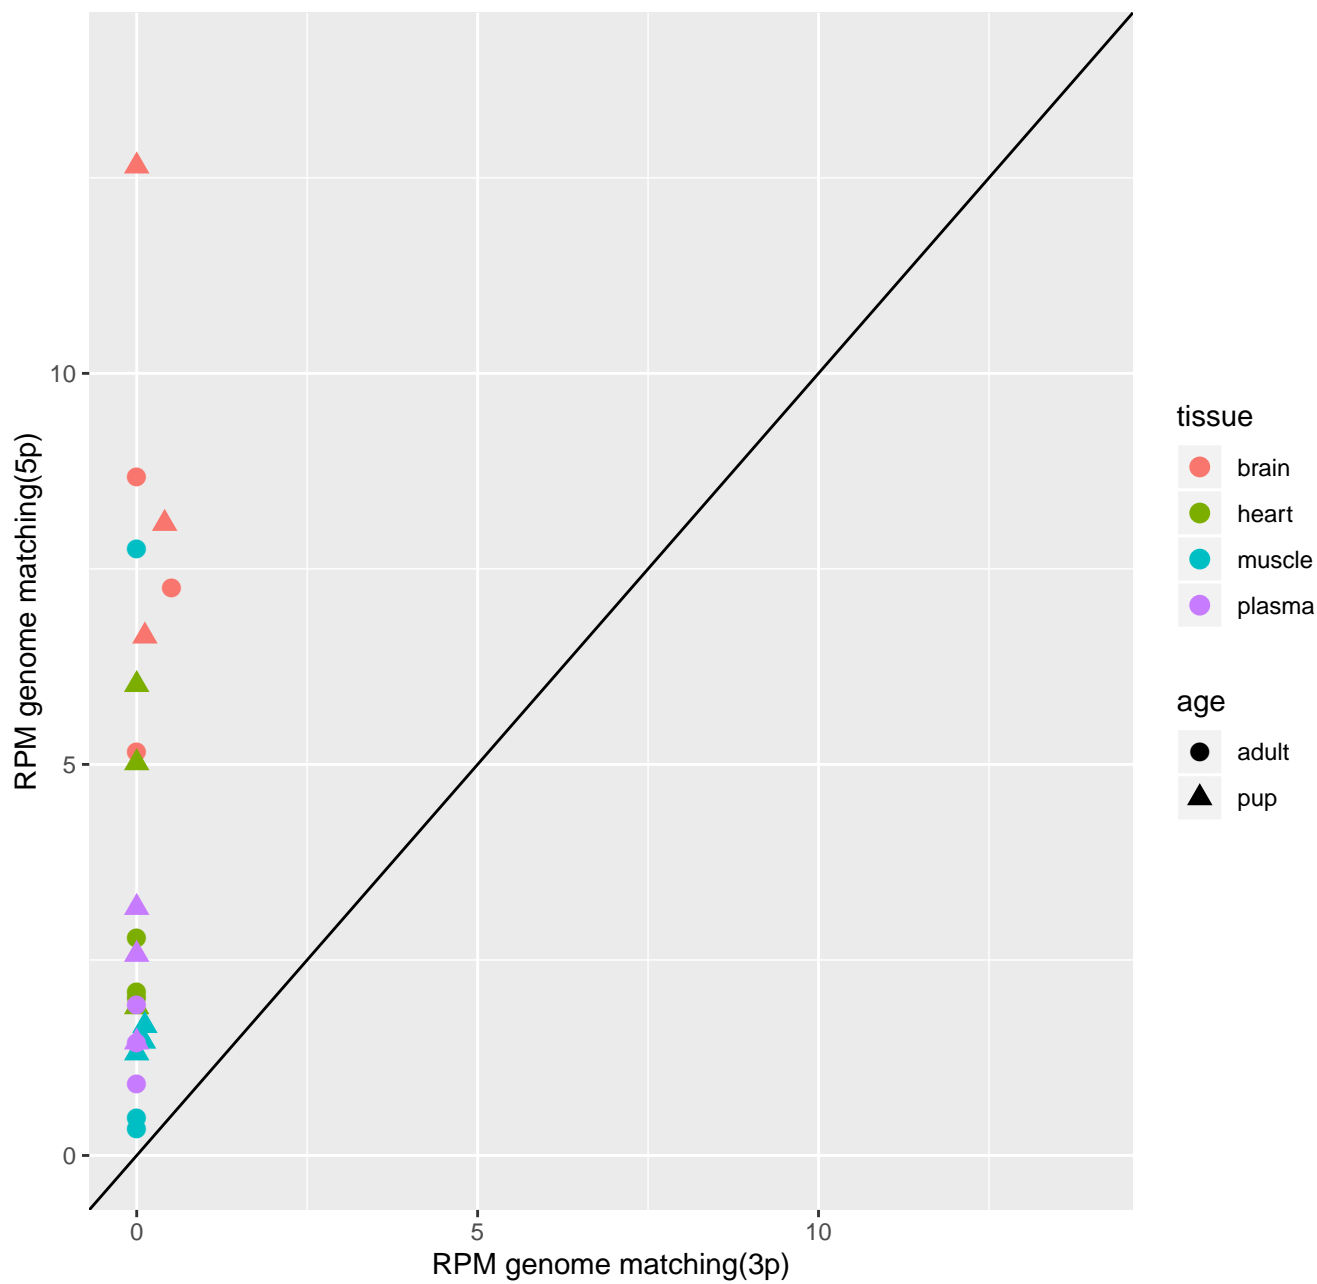

## lwe-miR-18\_loc1

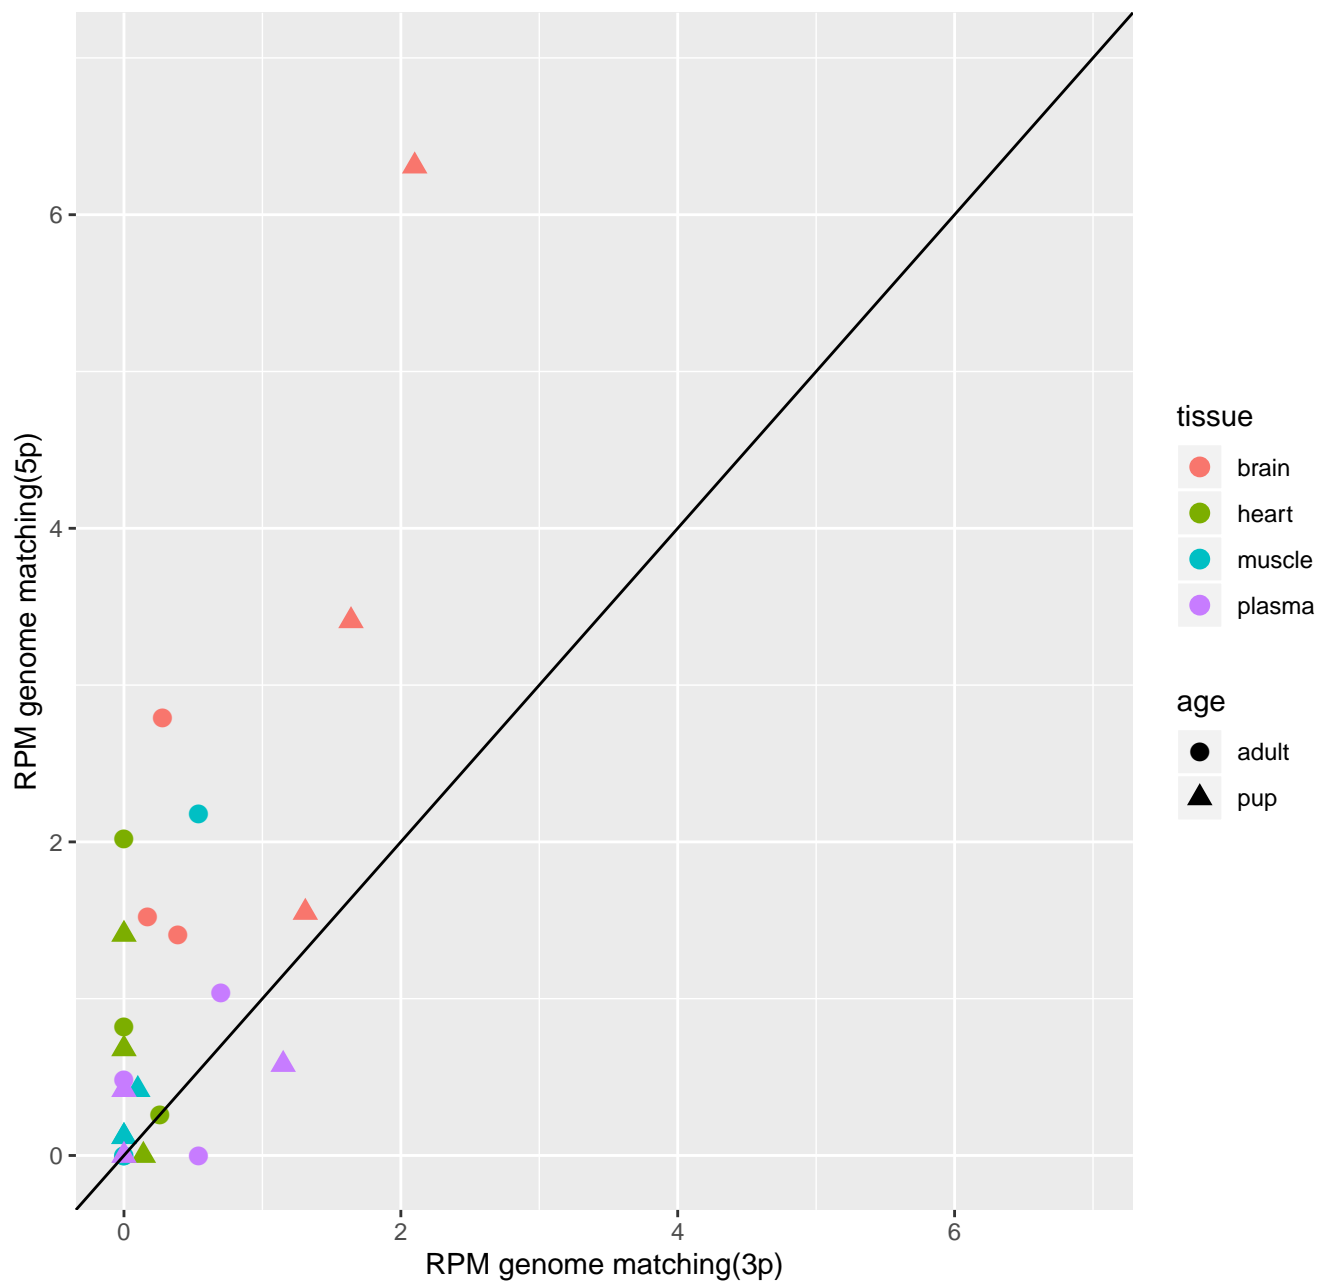

## lwe-miR-20b\_loc1

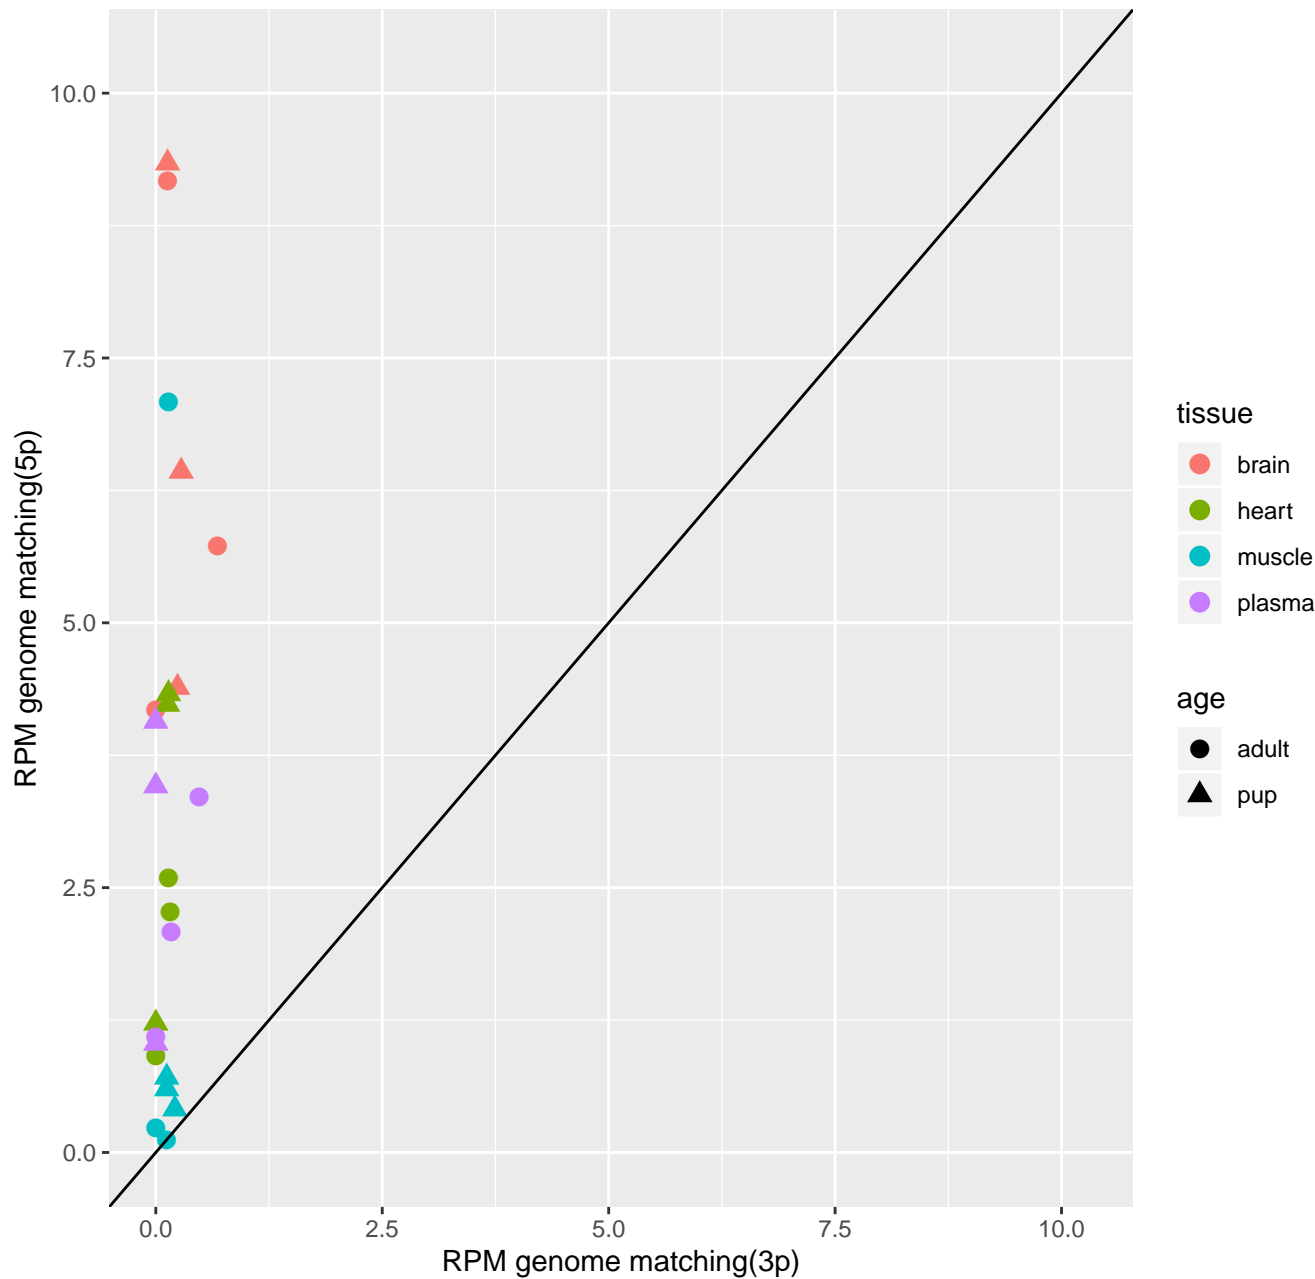

## lwe-miR-19\_loc2

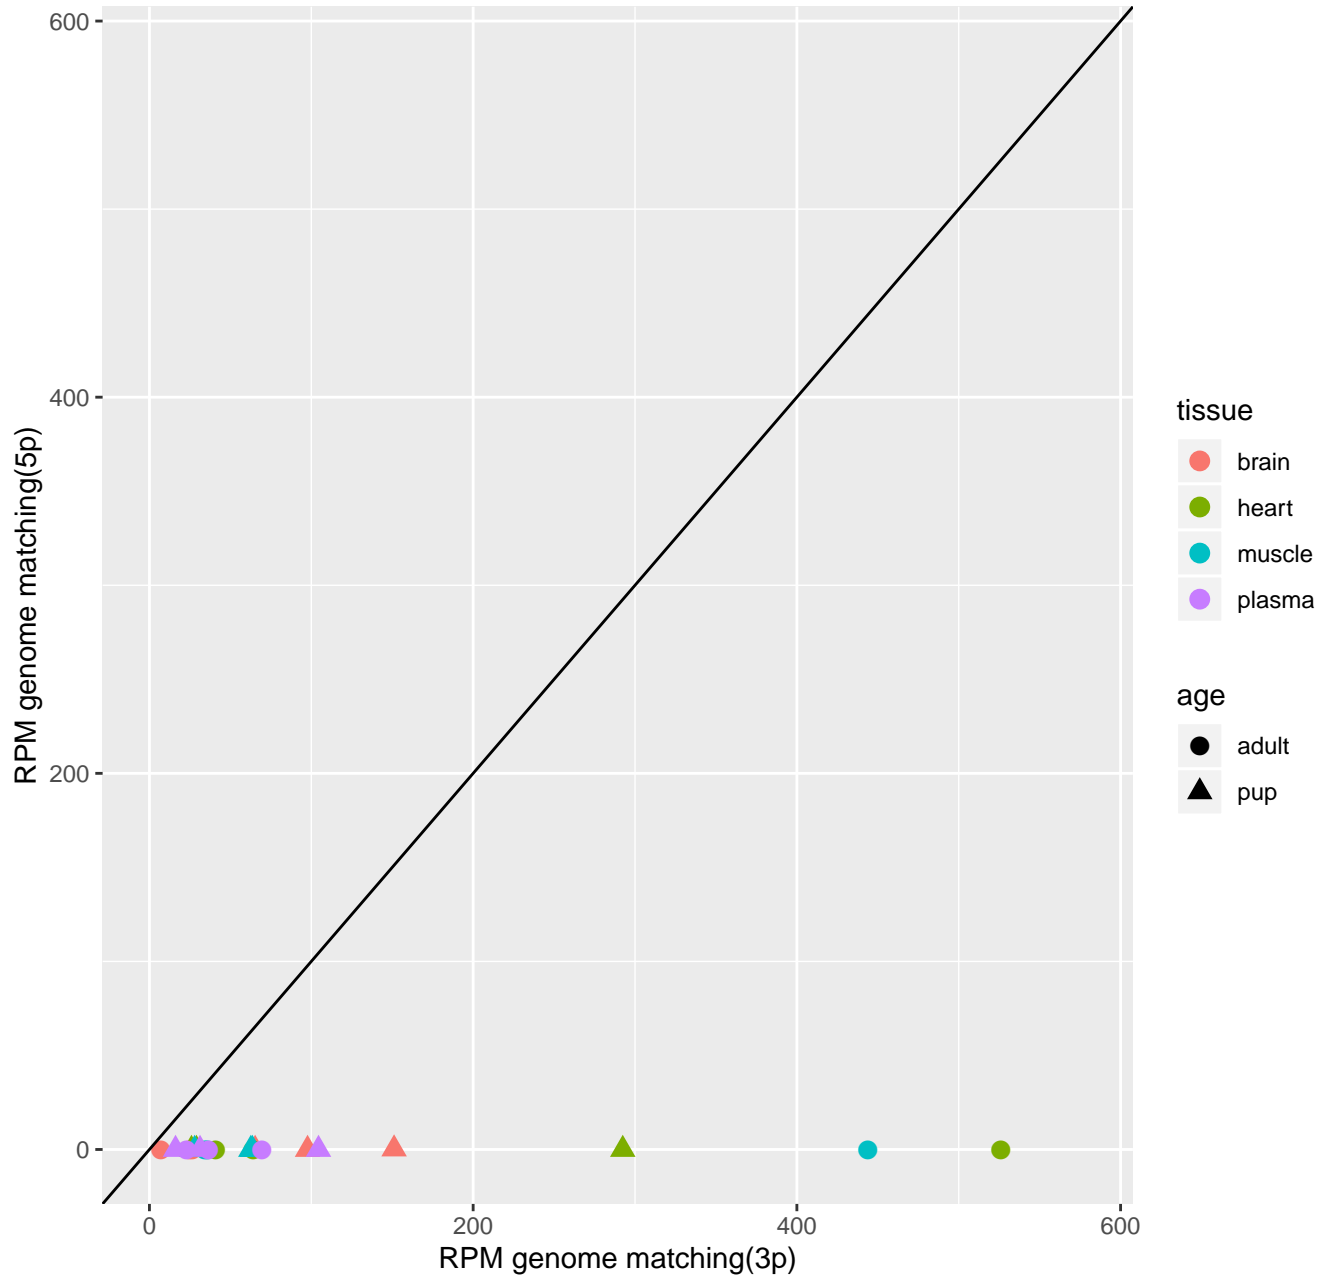

## lwe-miR-92\_loc1

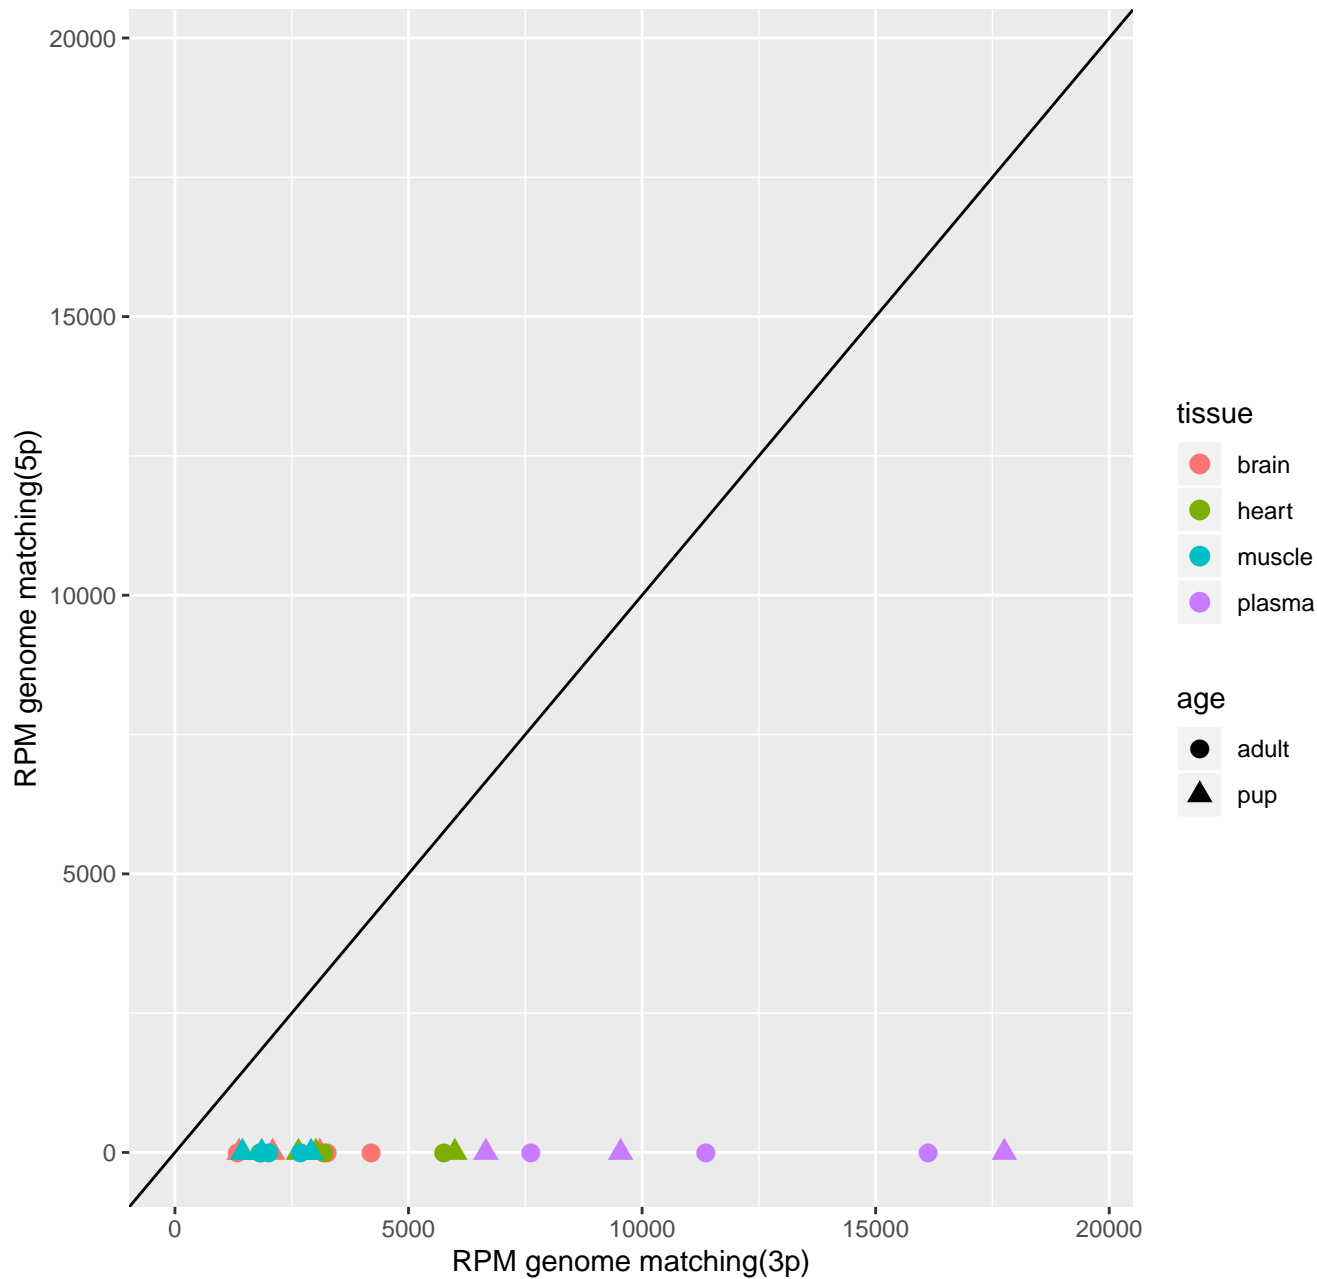

## lwe-miR-363\_loc1

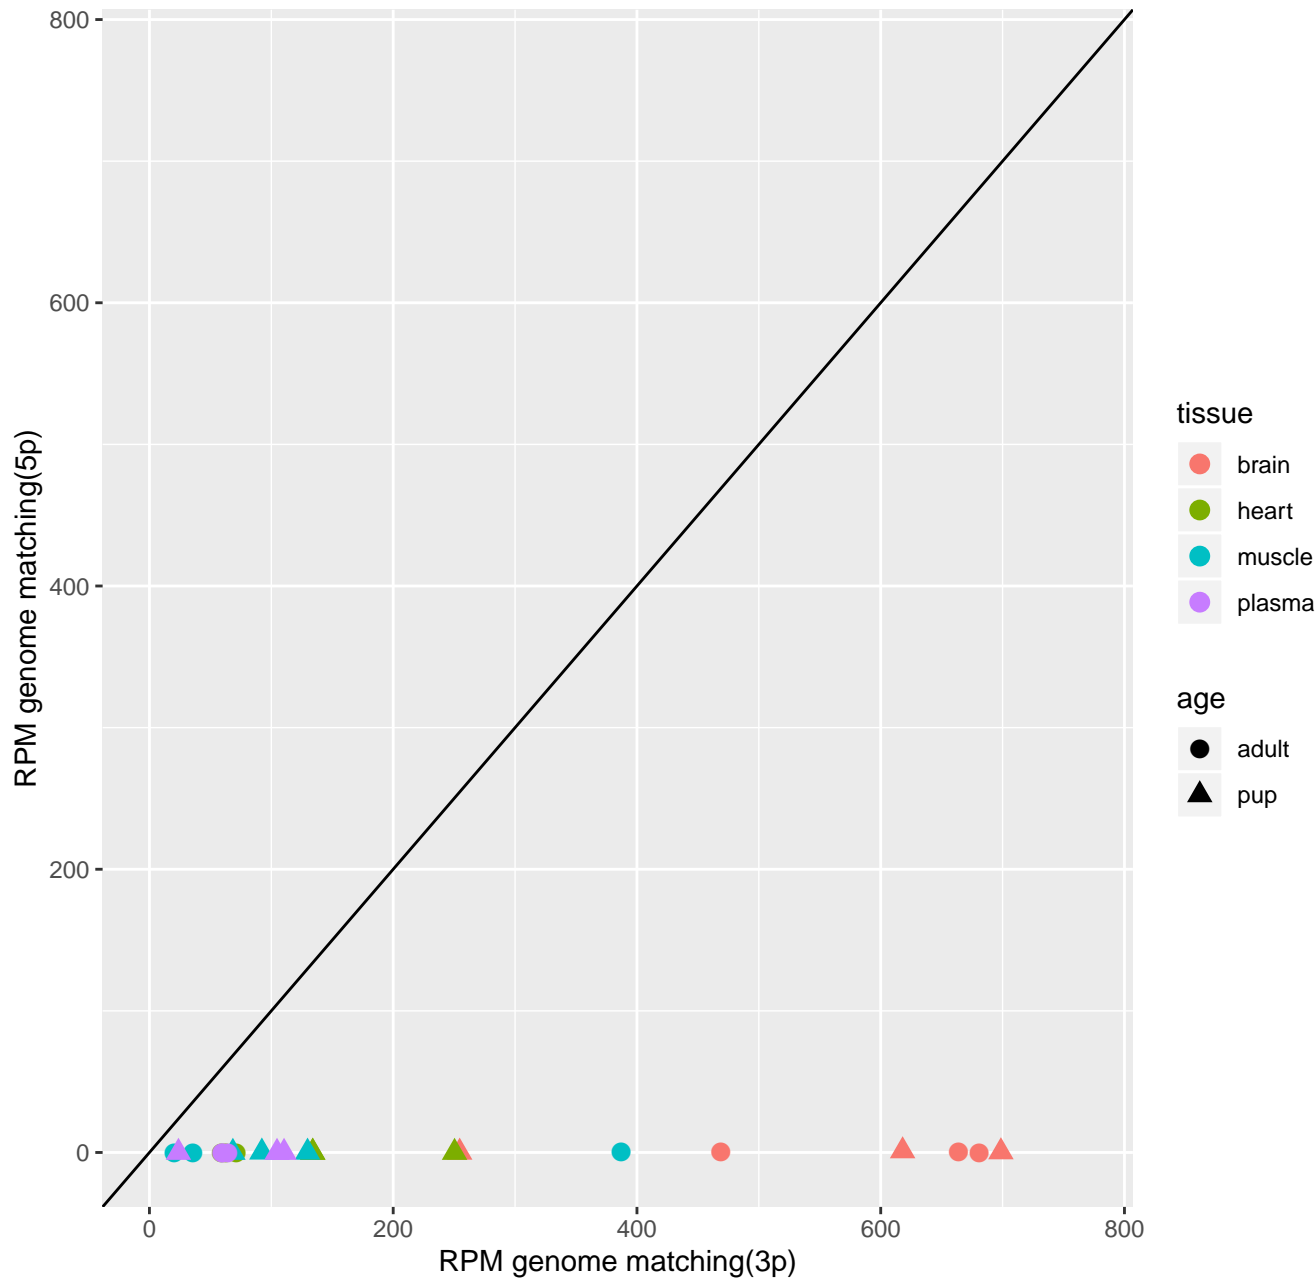



# lwe-miR-215\_loc1

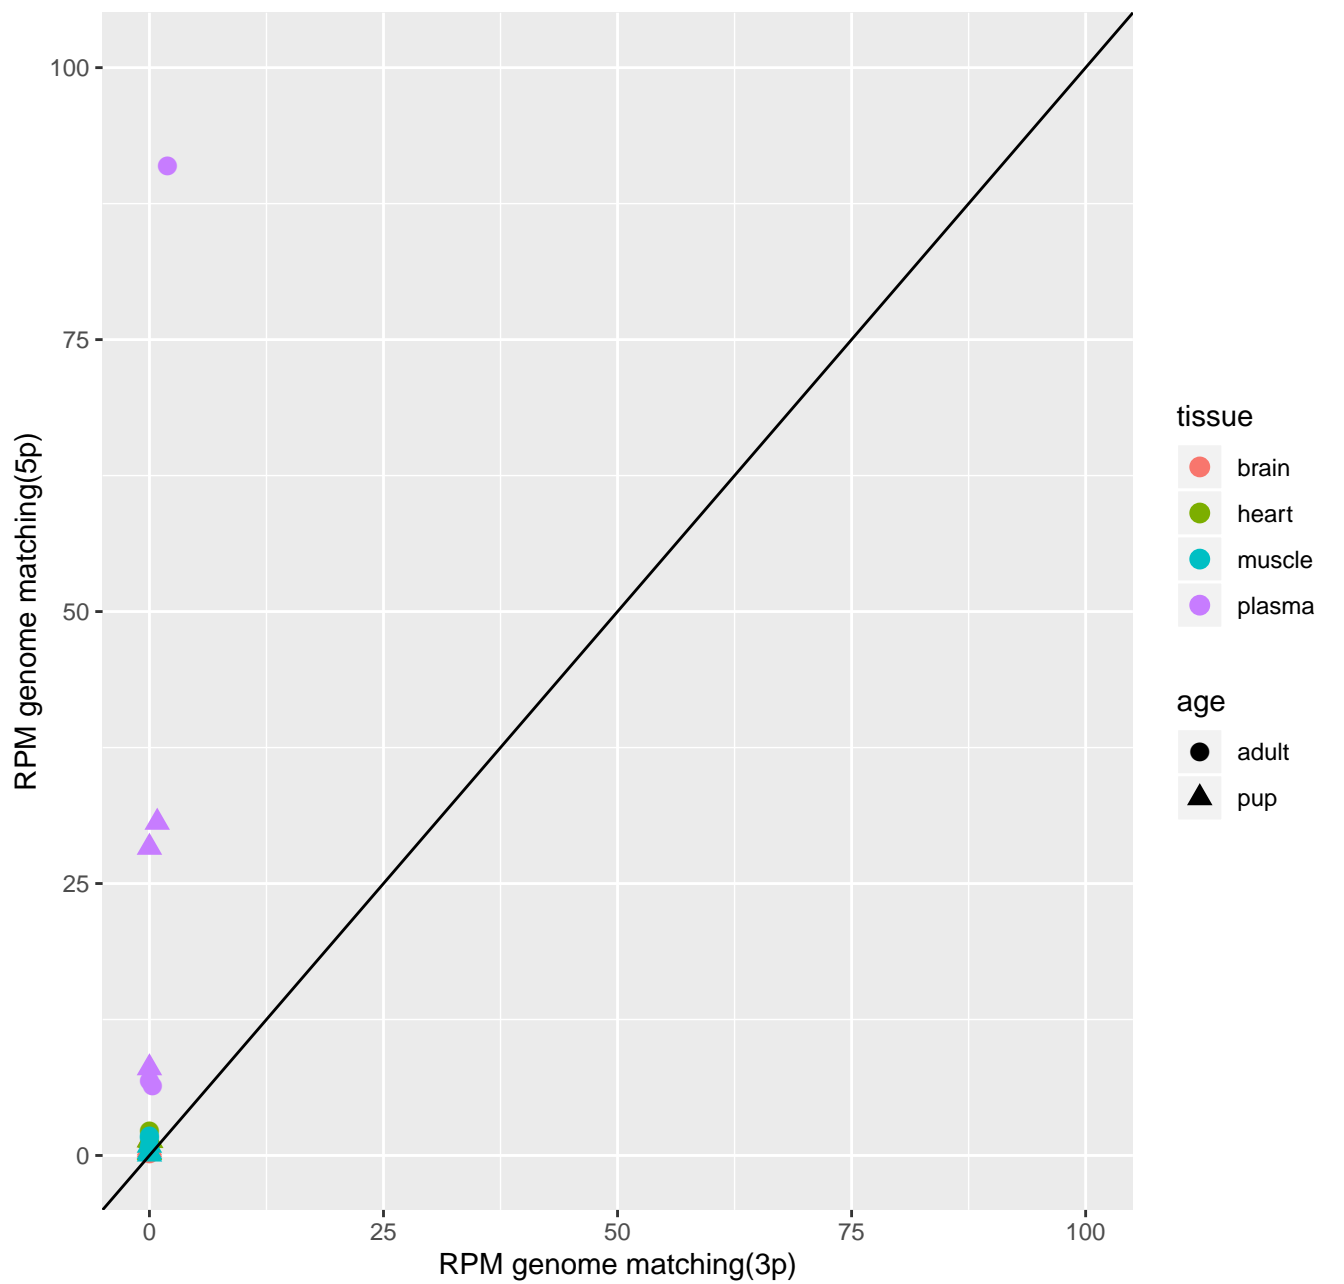

novel\_97

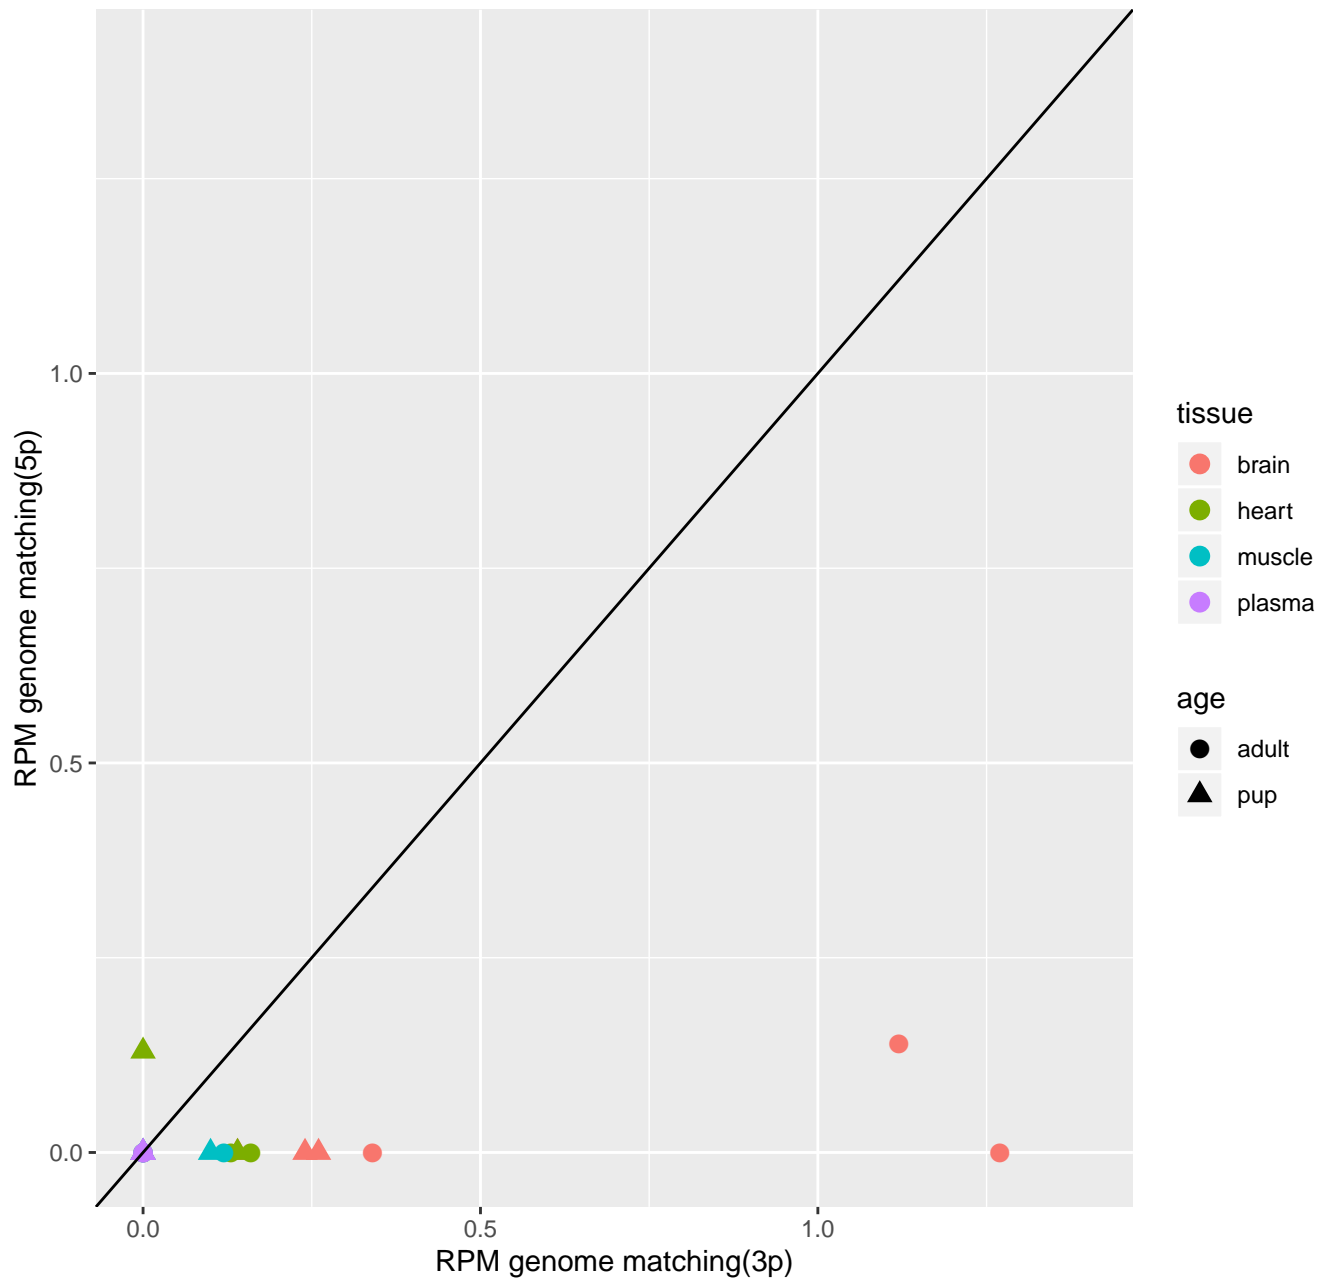

# lwe-miR-664\_loc1

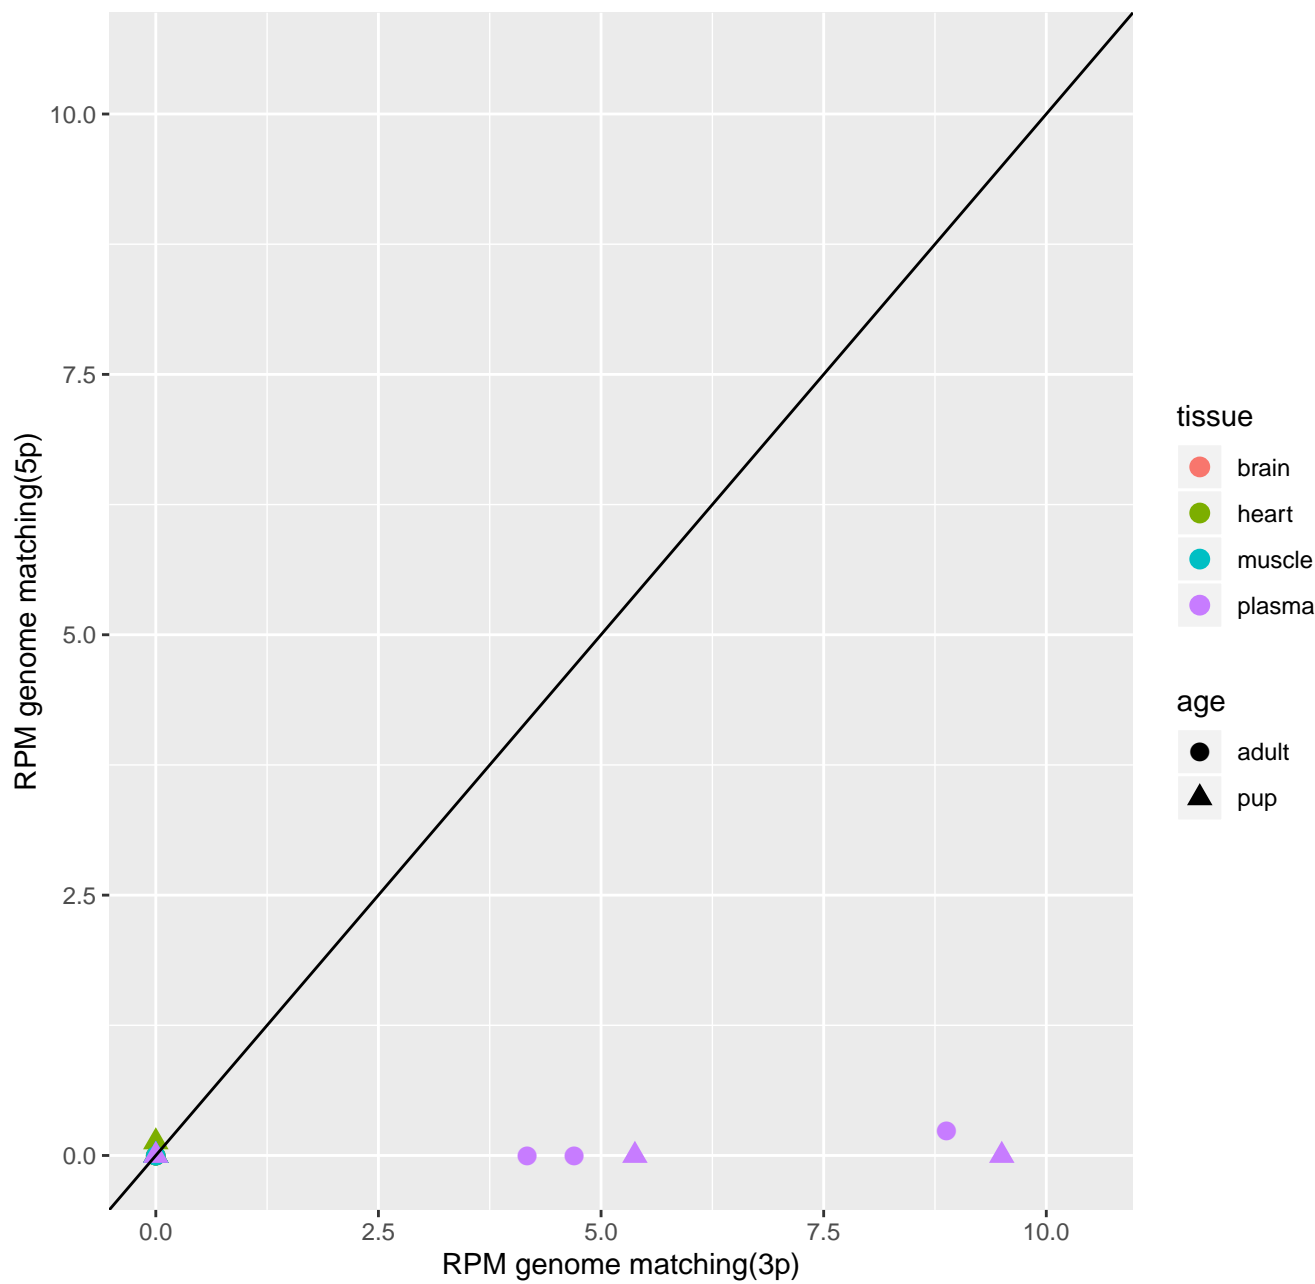

## lwe-miR-181a\_loc2

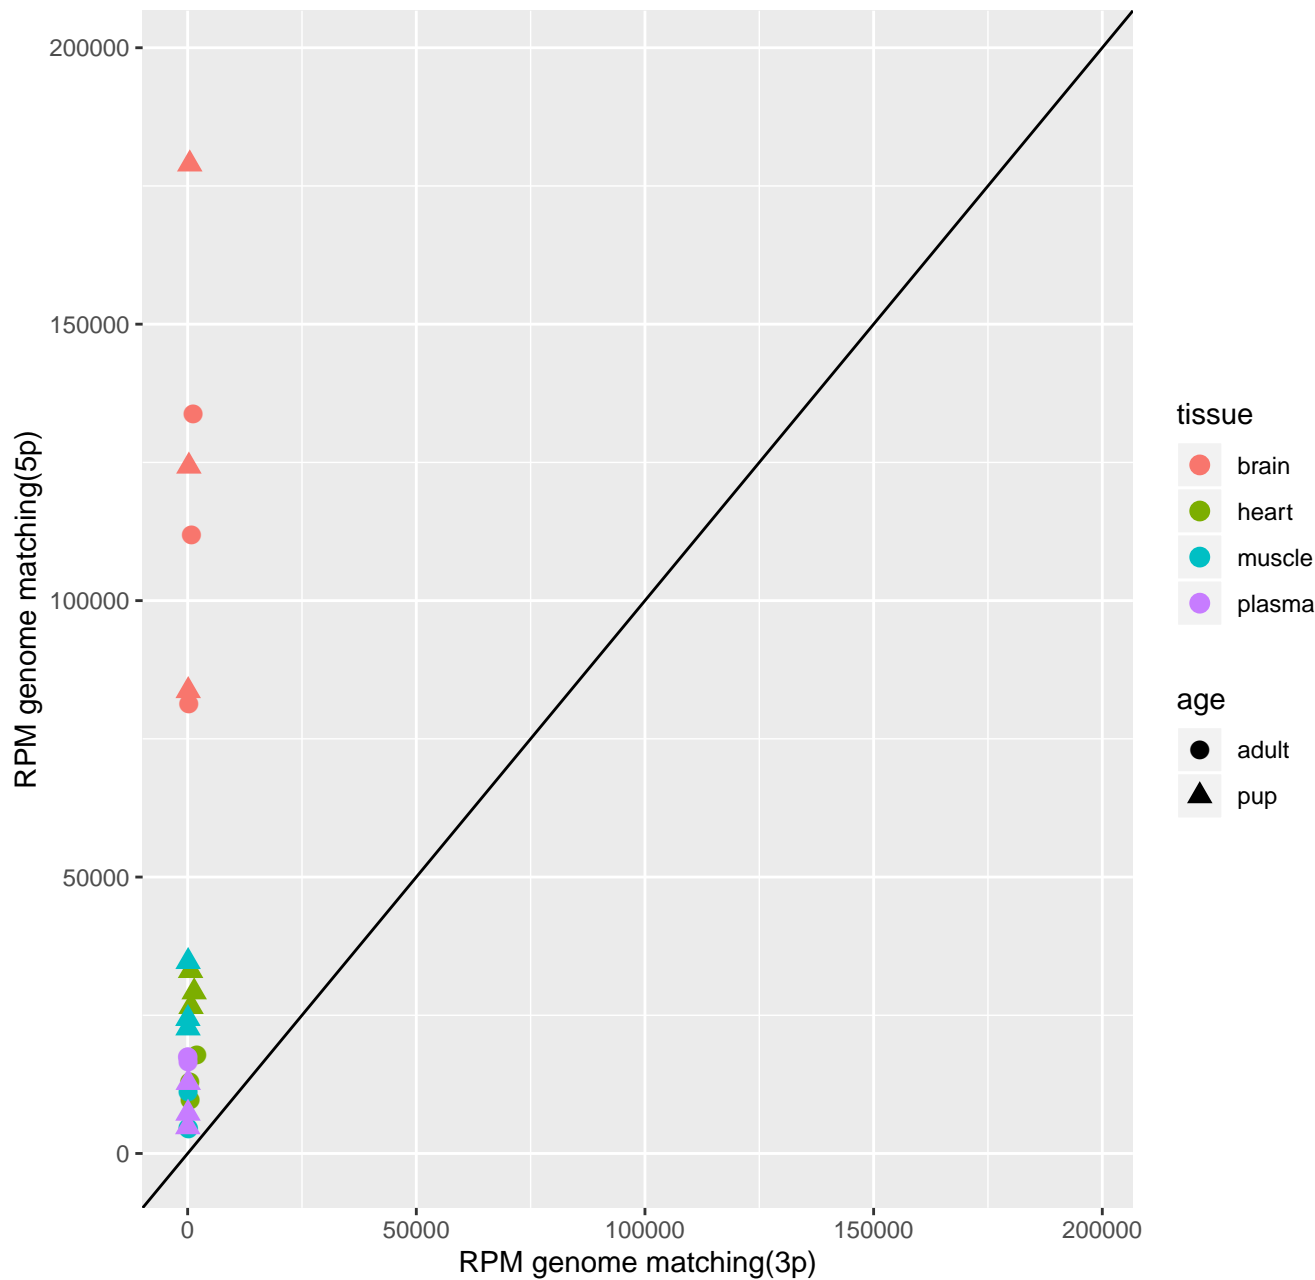

## lwe-miR-181b\_loc2

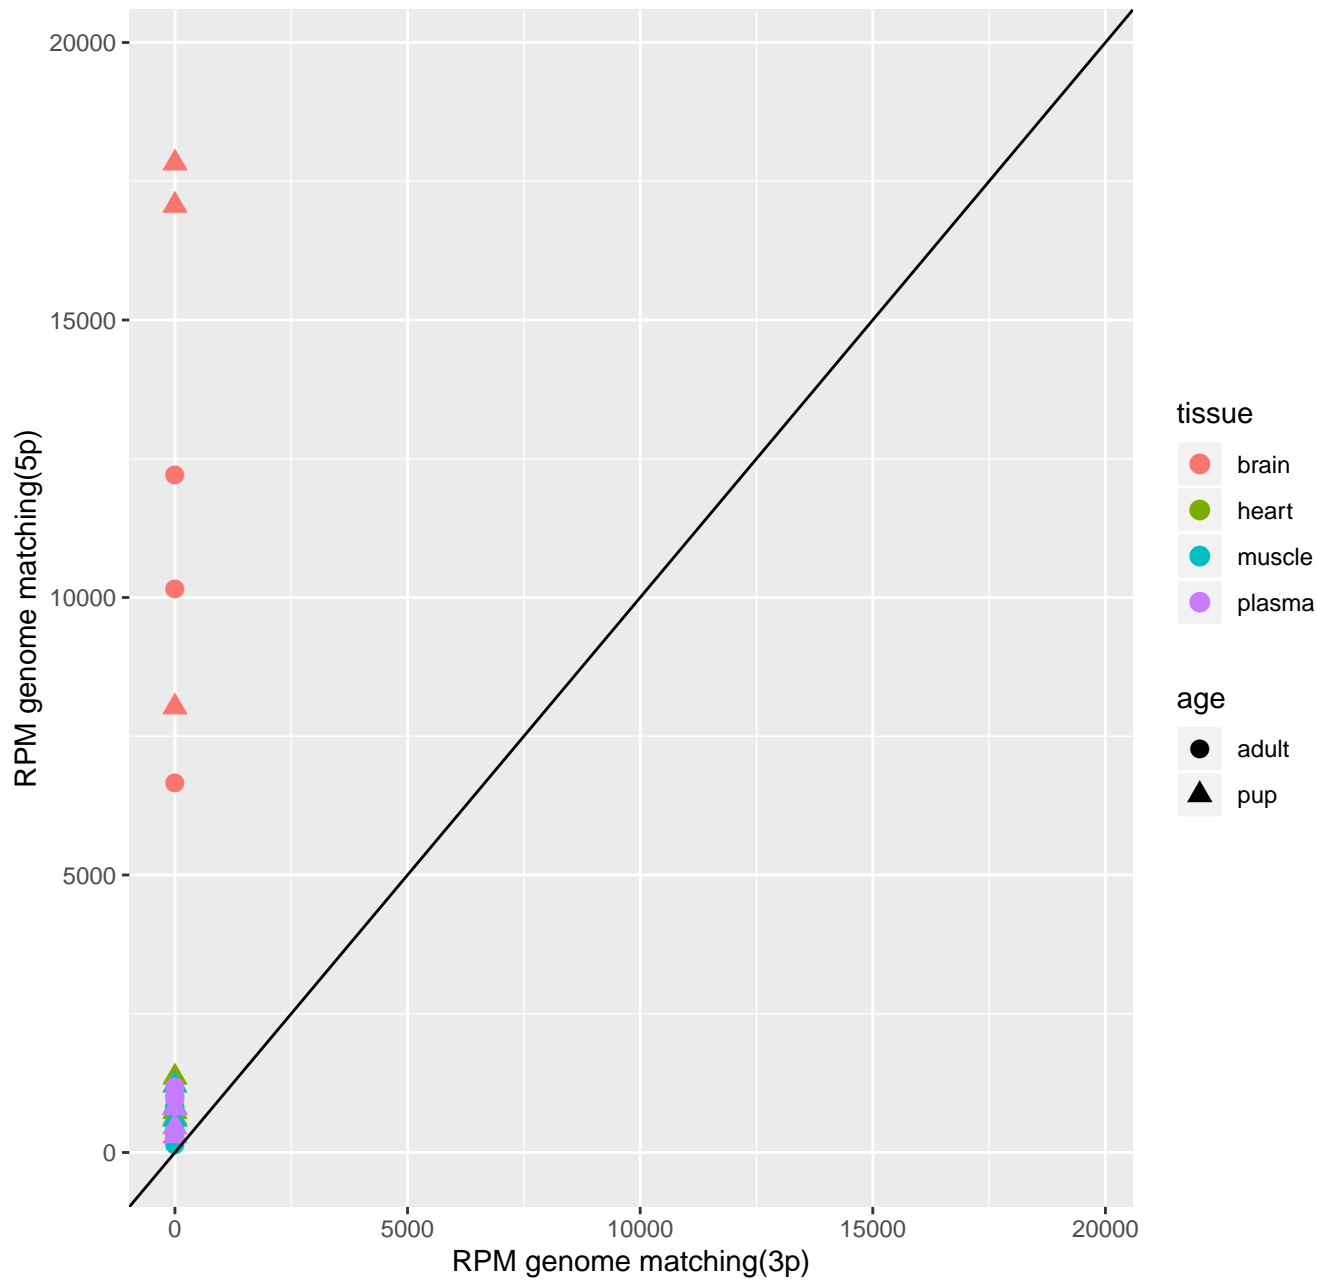

## lwe-miR-126a\_loc1

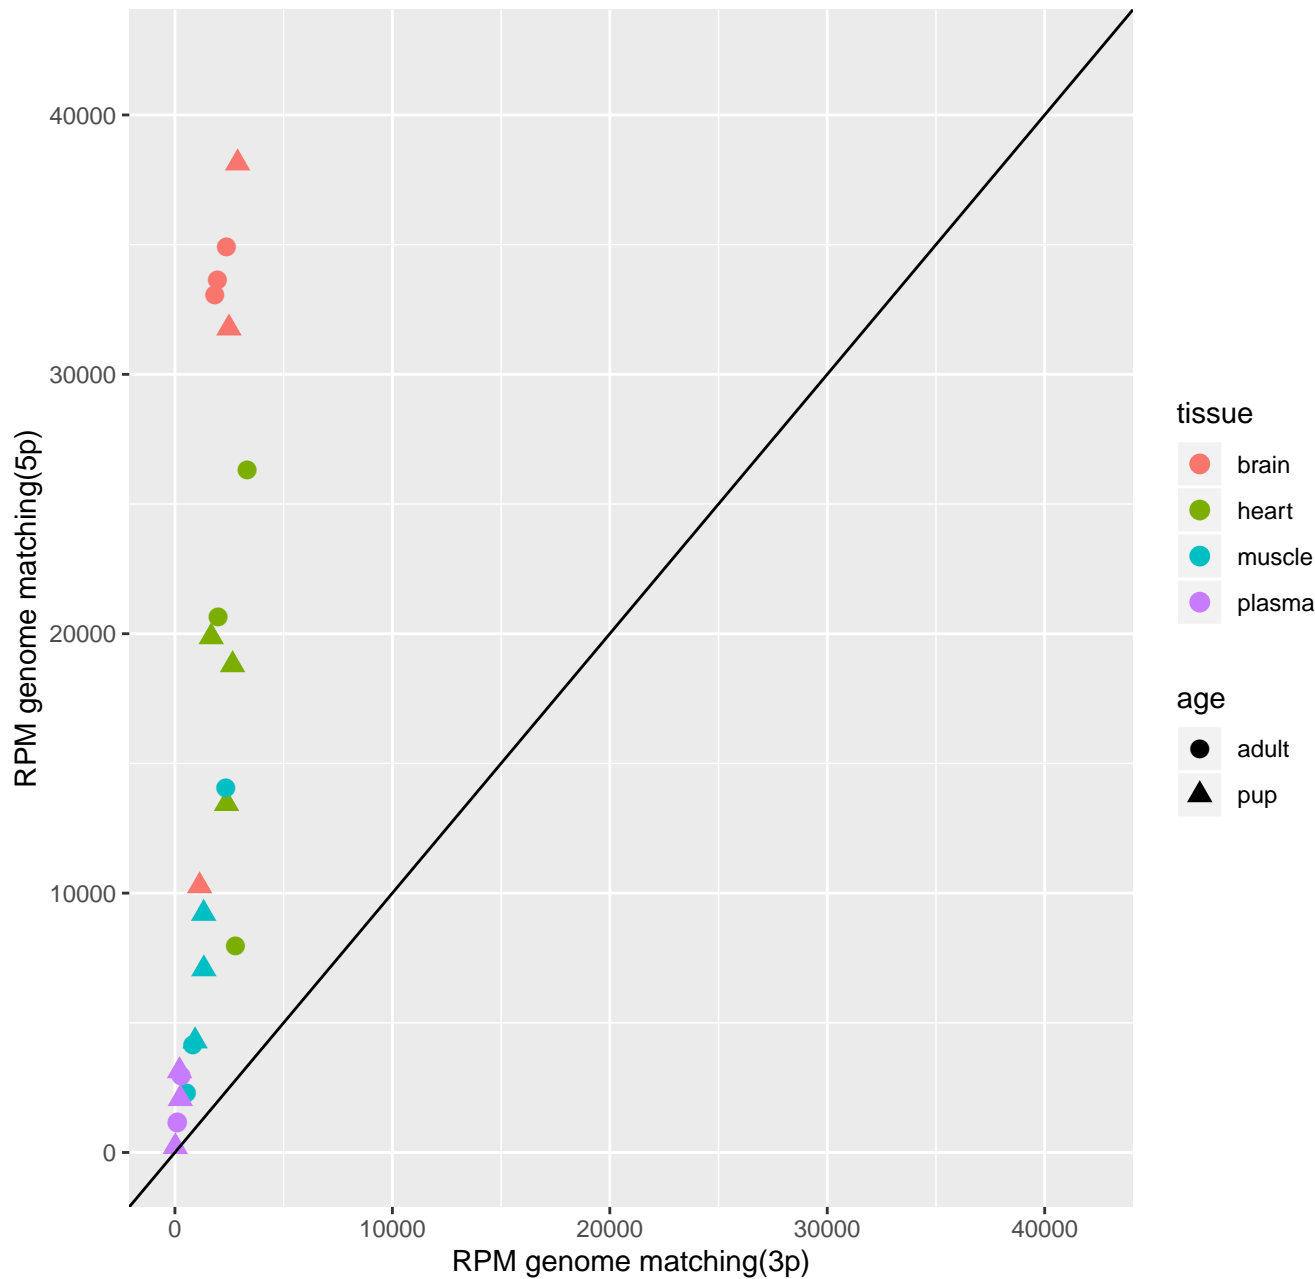

## lwe-miR-1247\_loc1

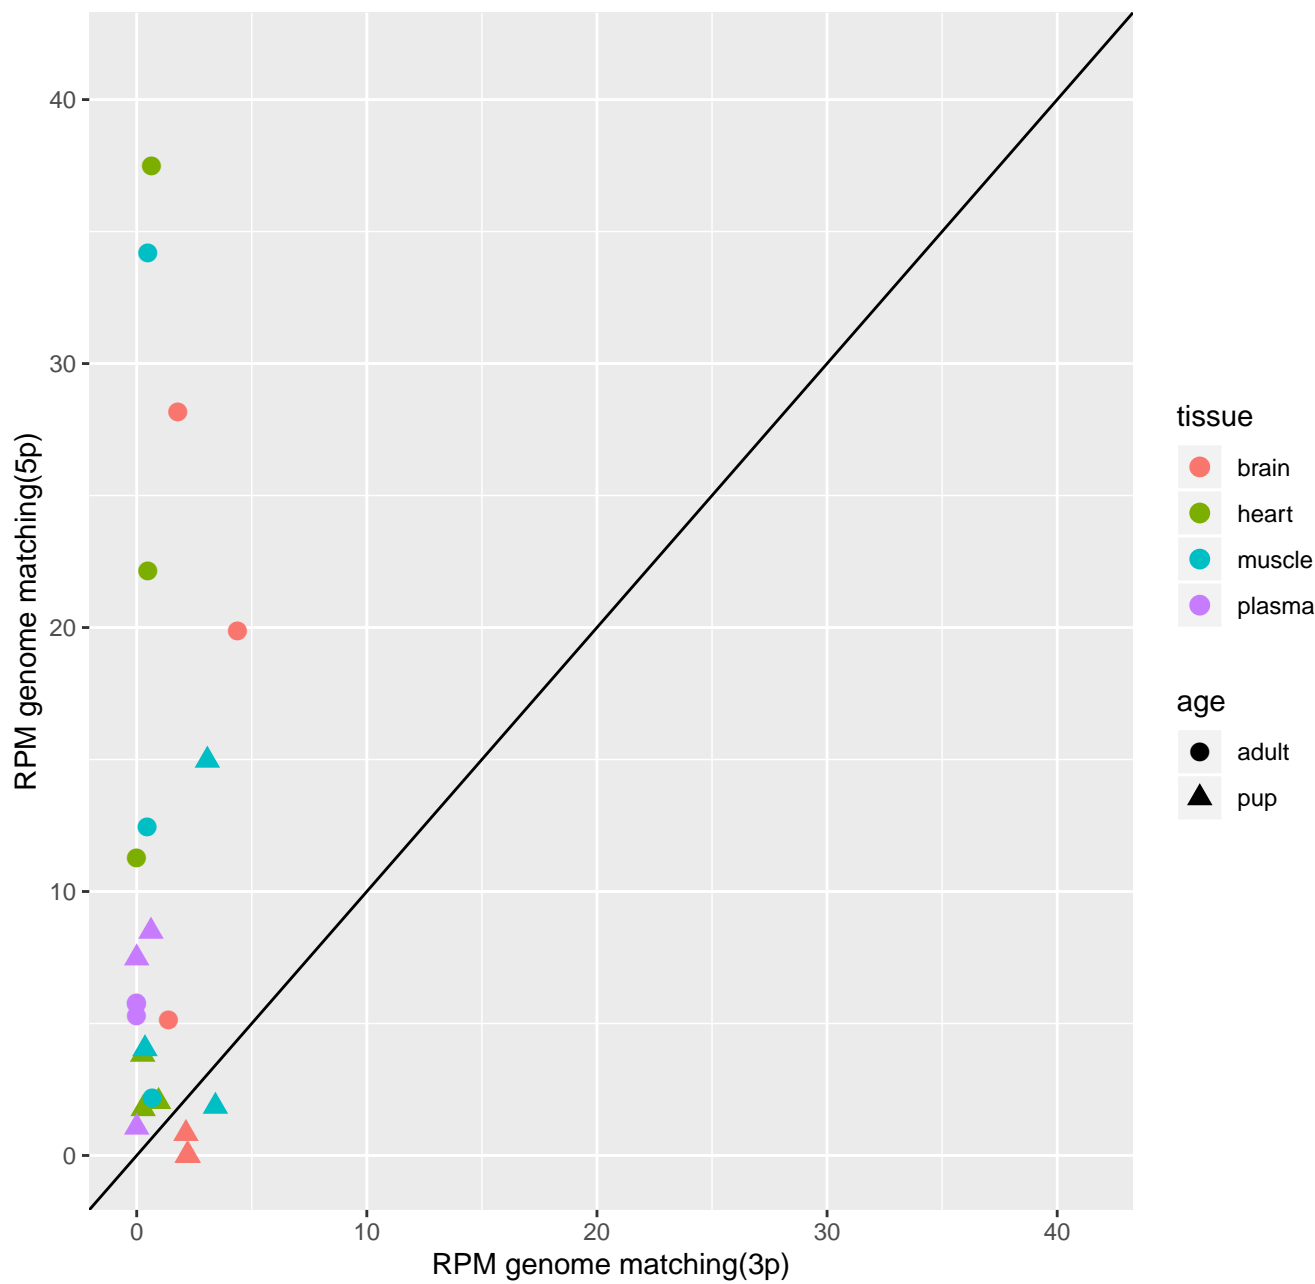

## lwe-miR-151a\_loc1

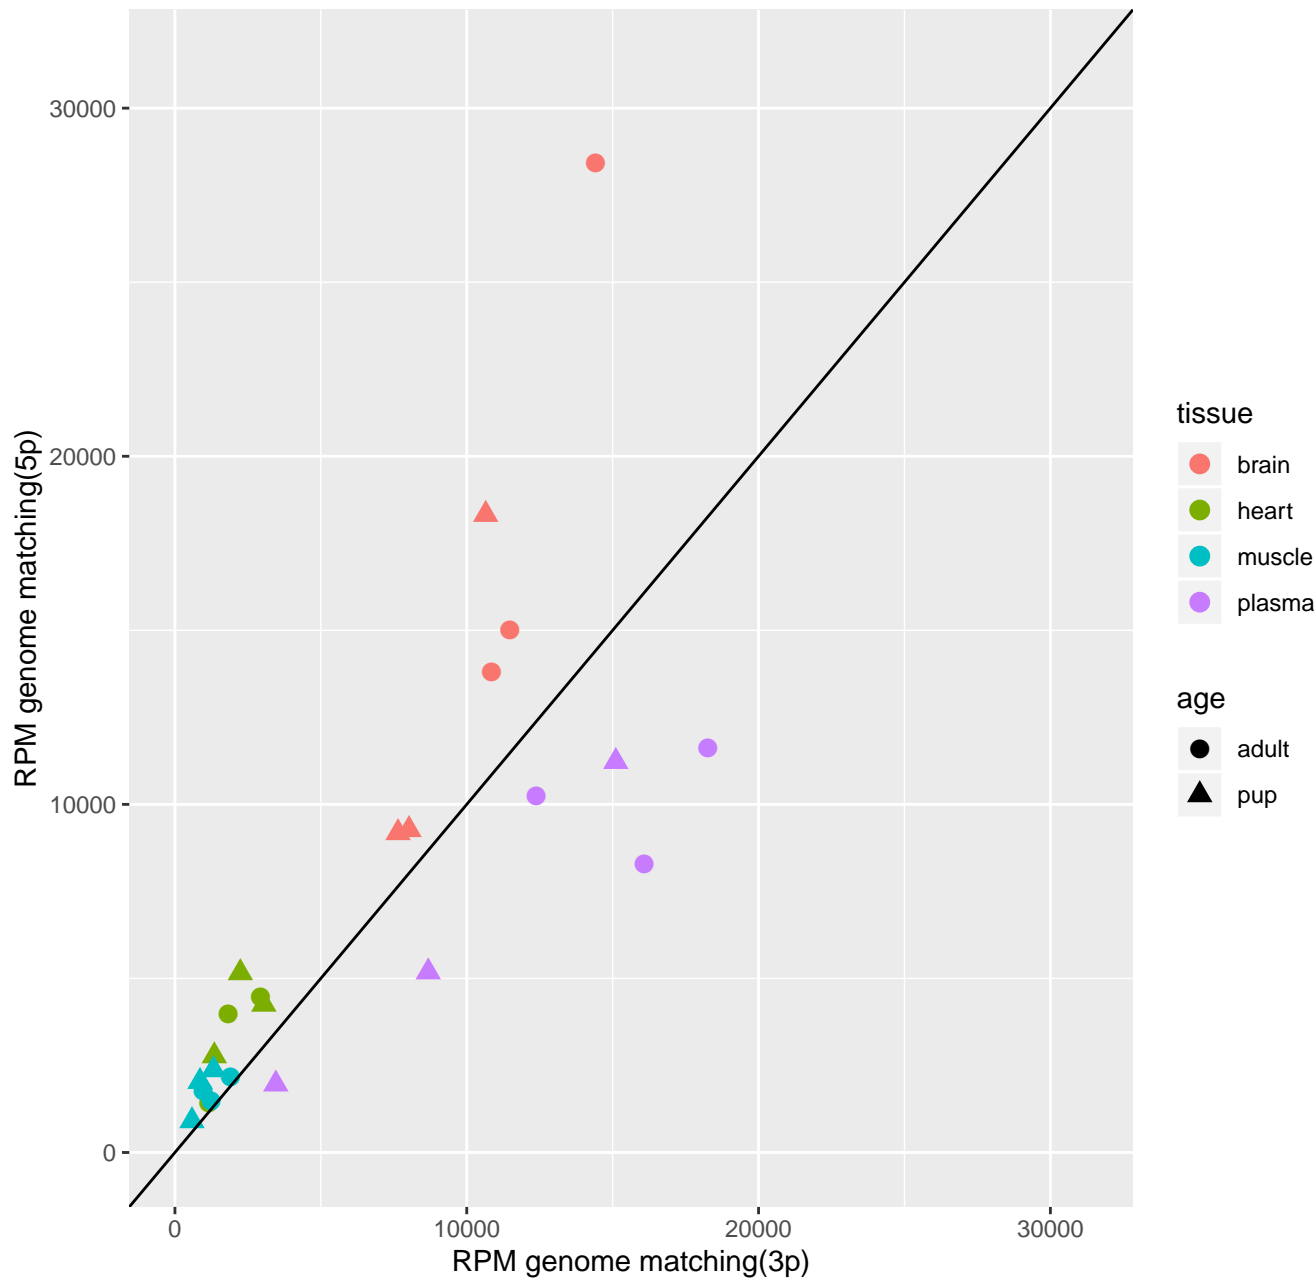



## novel\_98

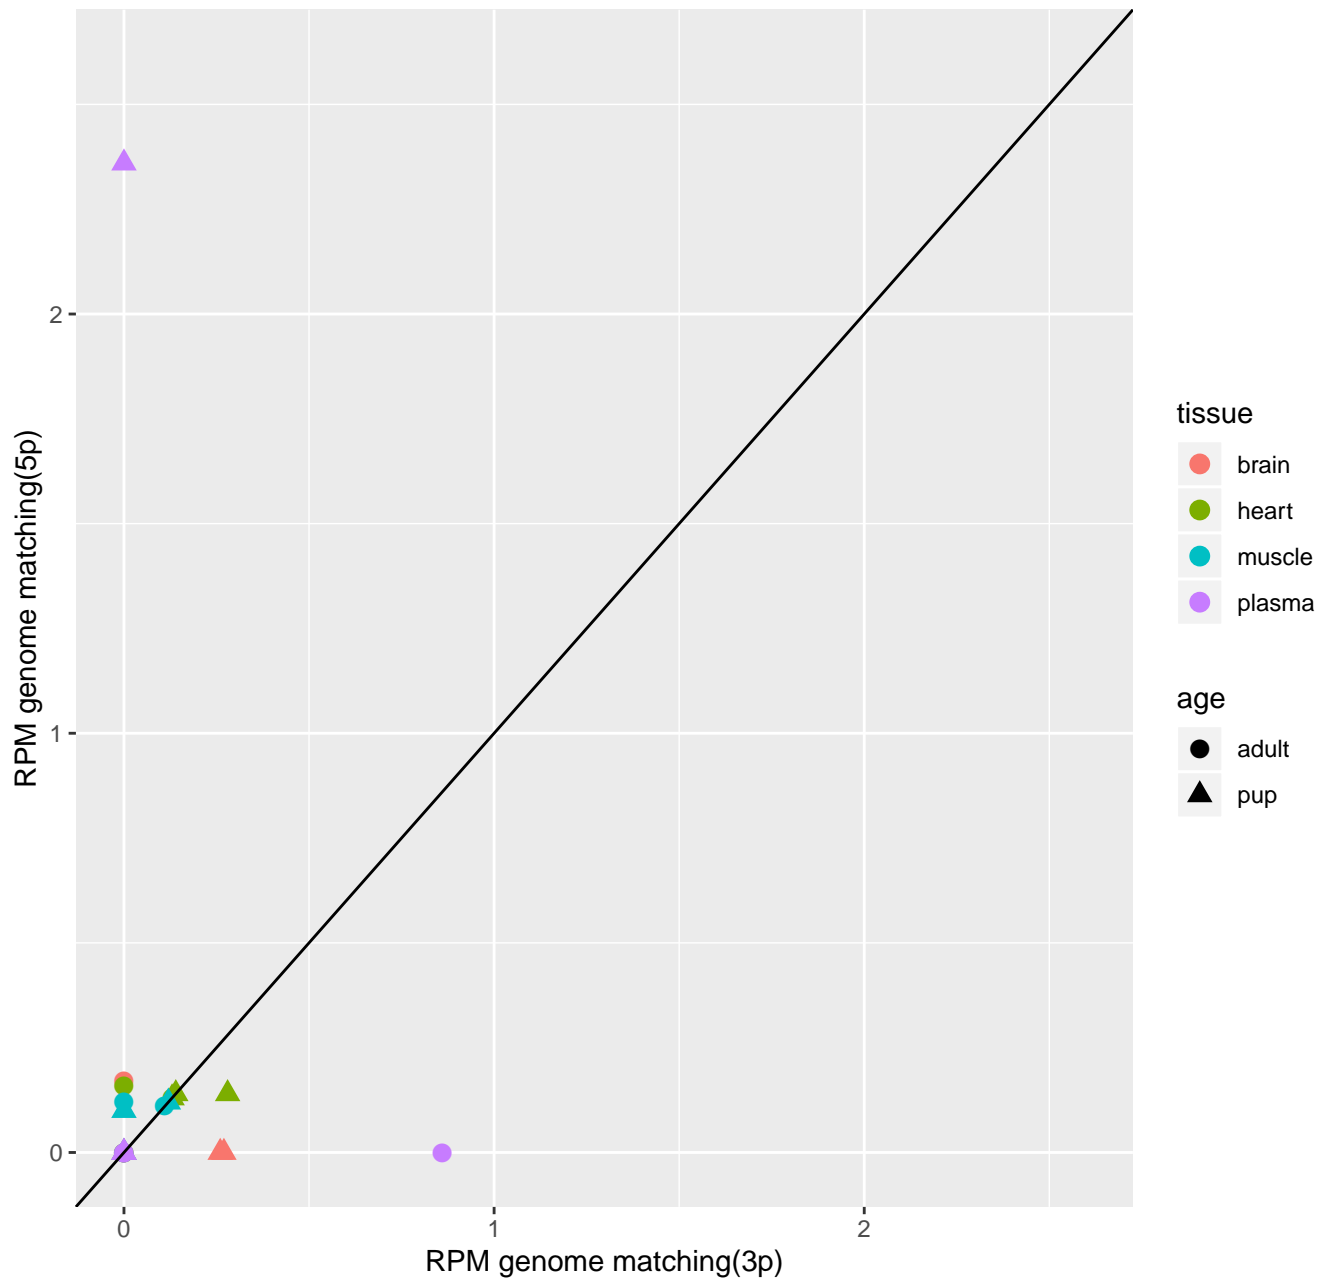

## lwe-miR-1301\_loc1

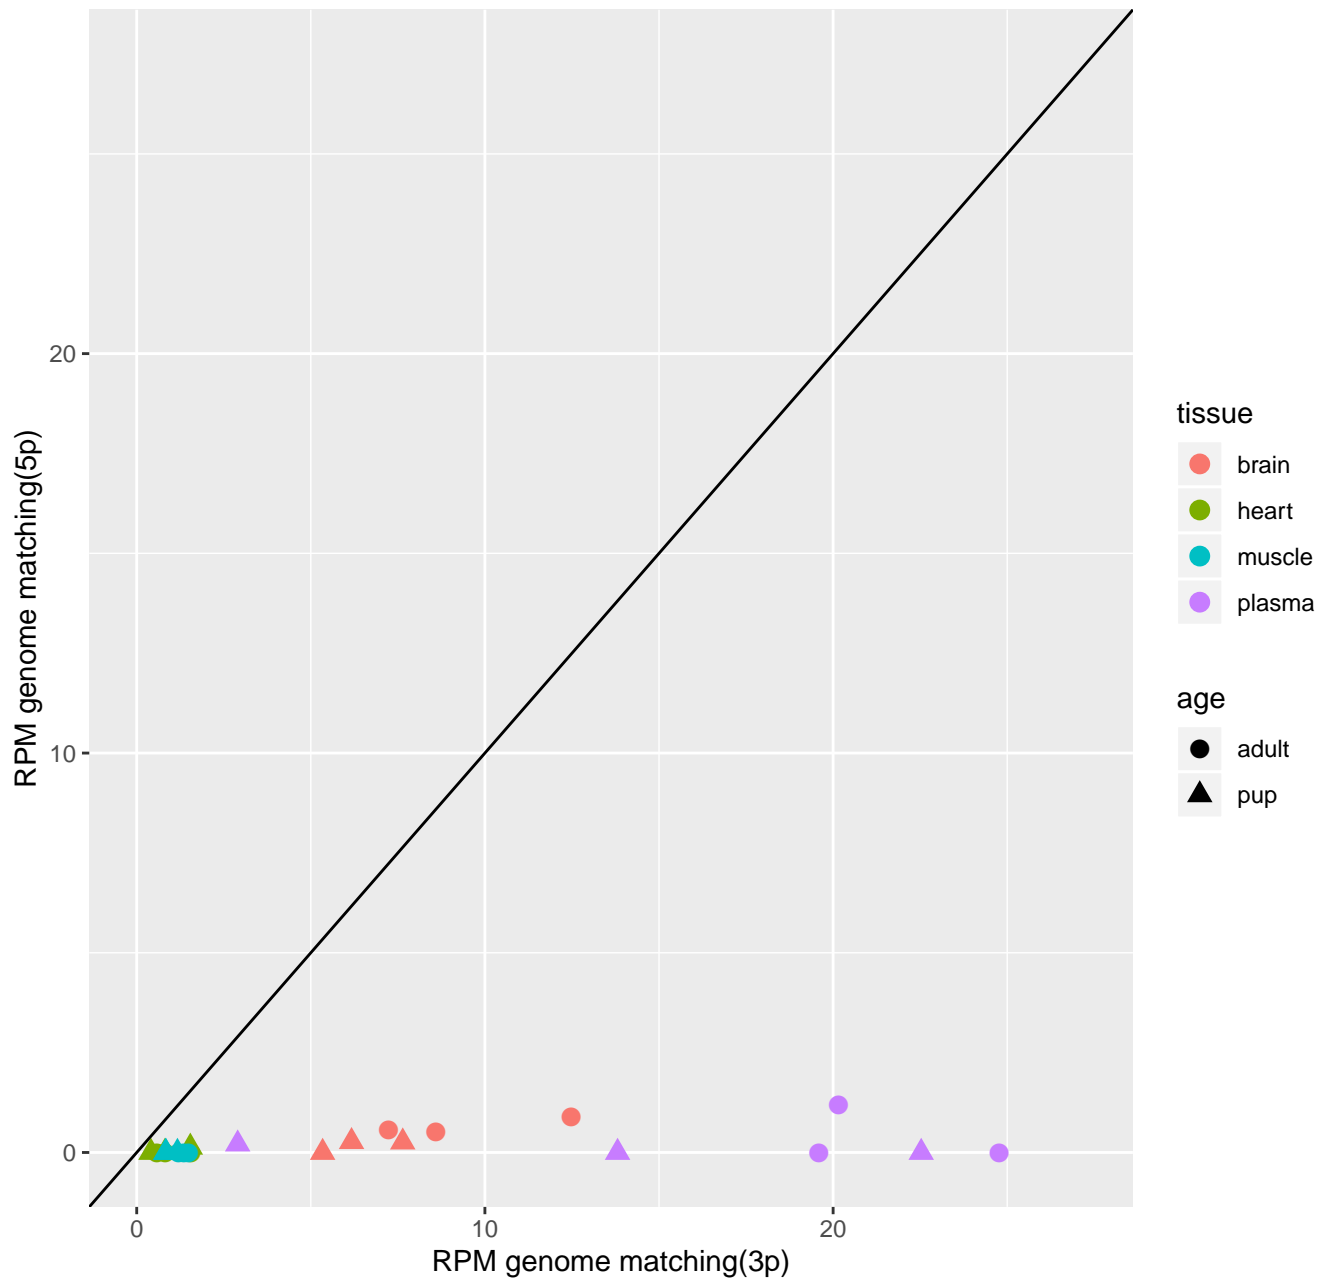

# lwe-miR-31a\_loc1

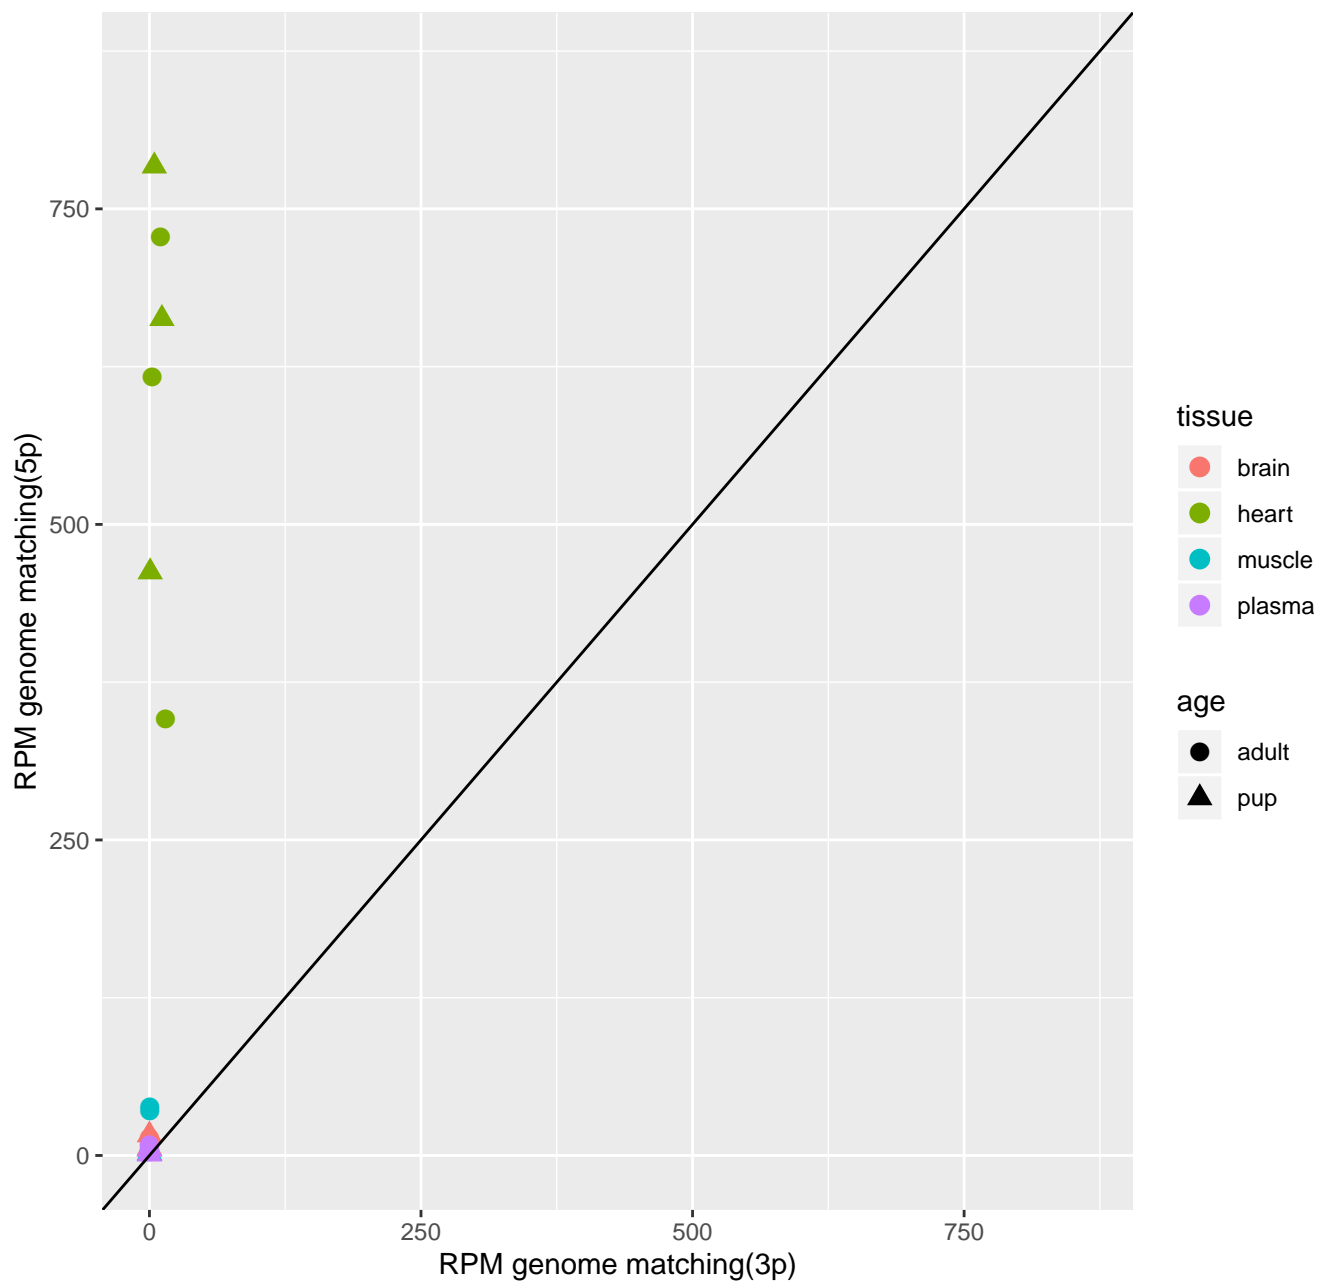

## lwe-miR-504\_loc1

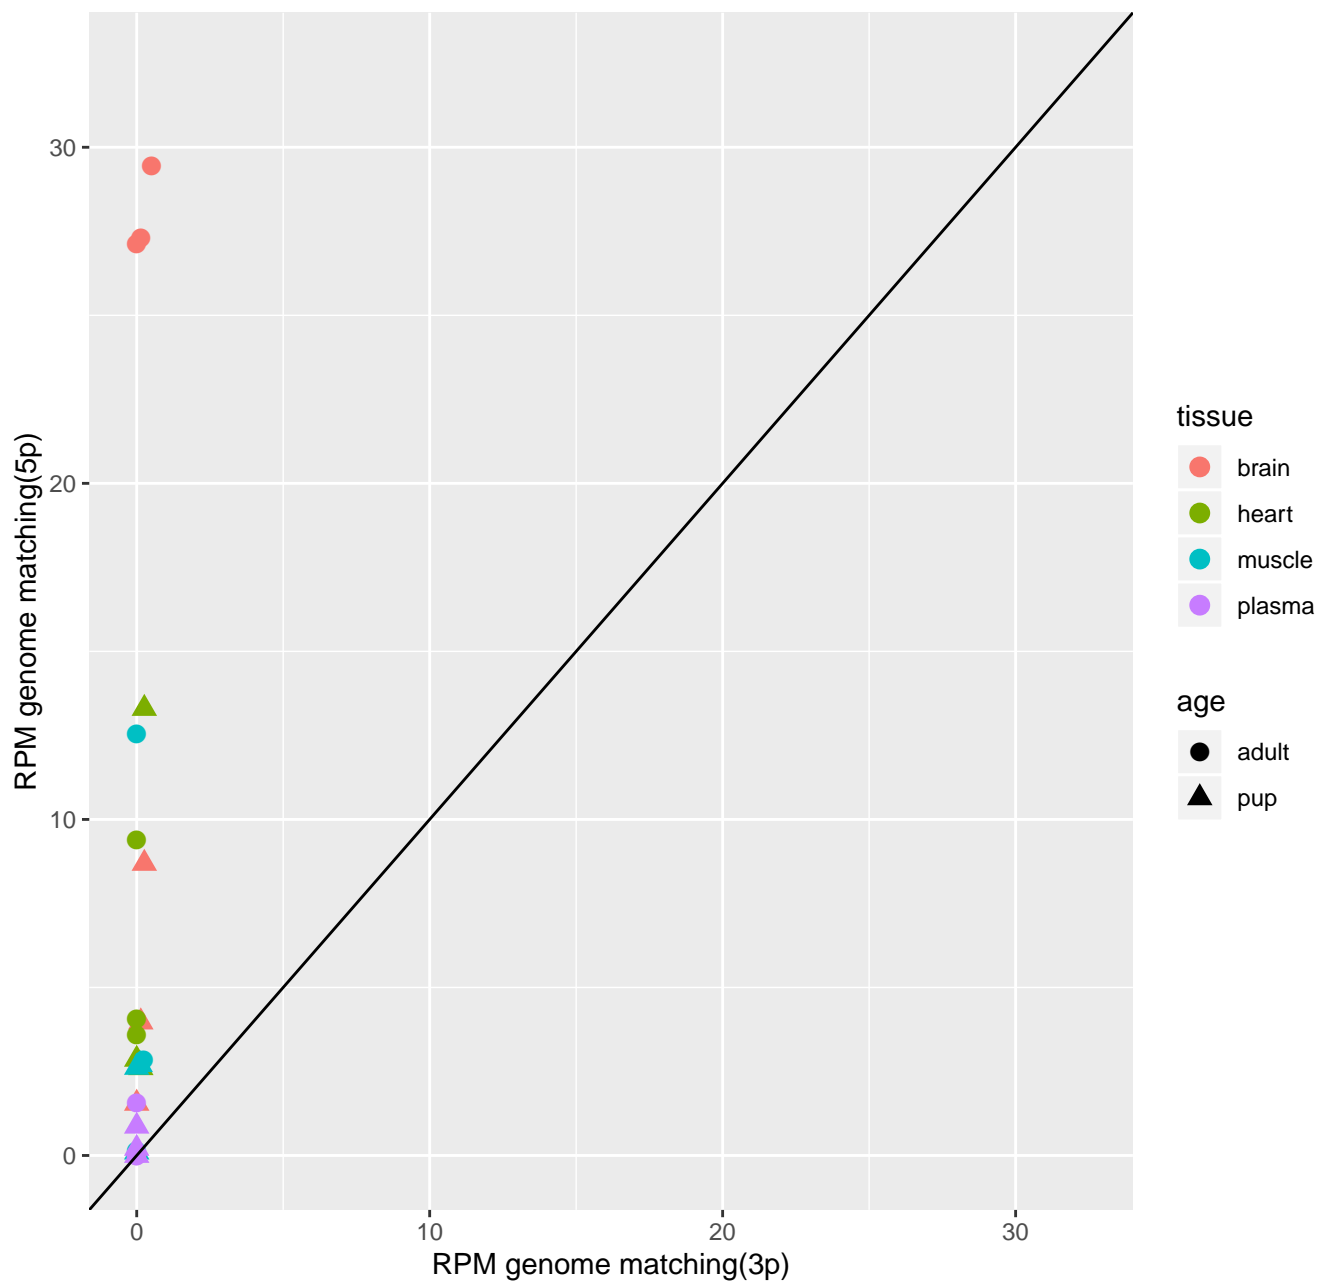

## lwe-miR-138\_loc2

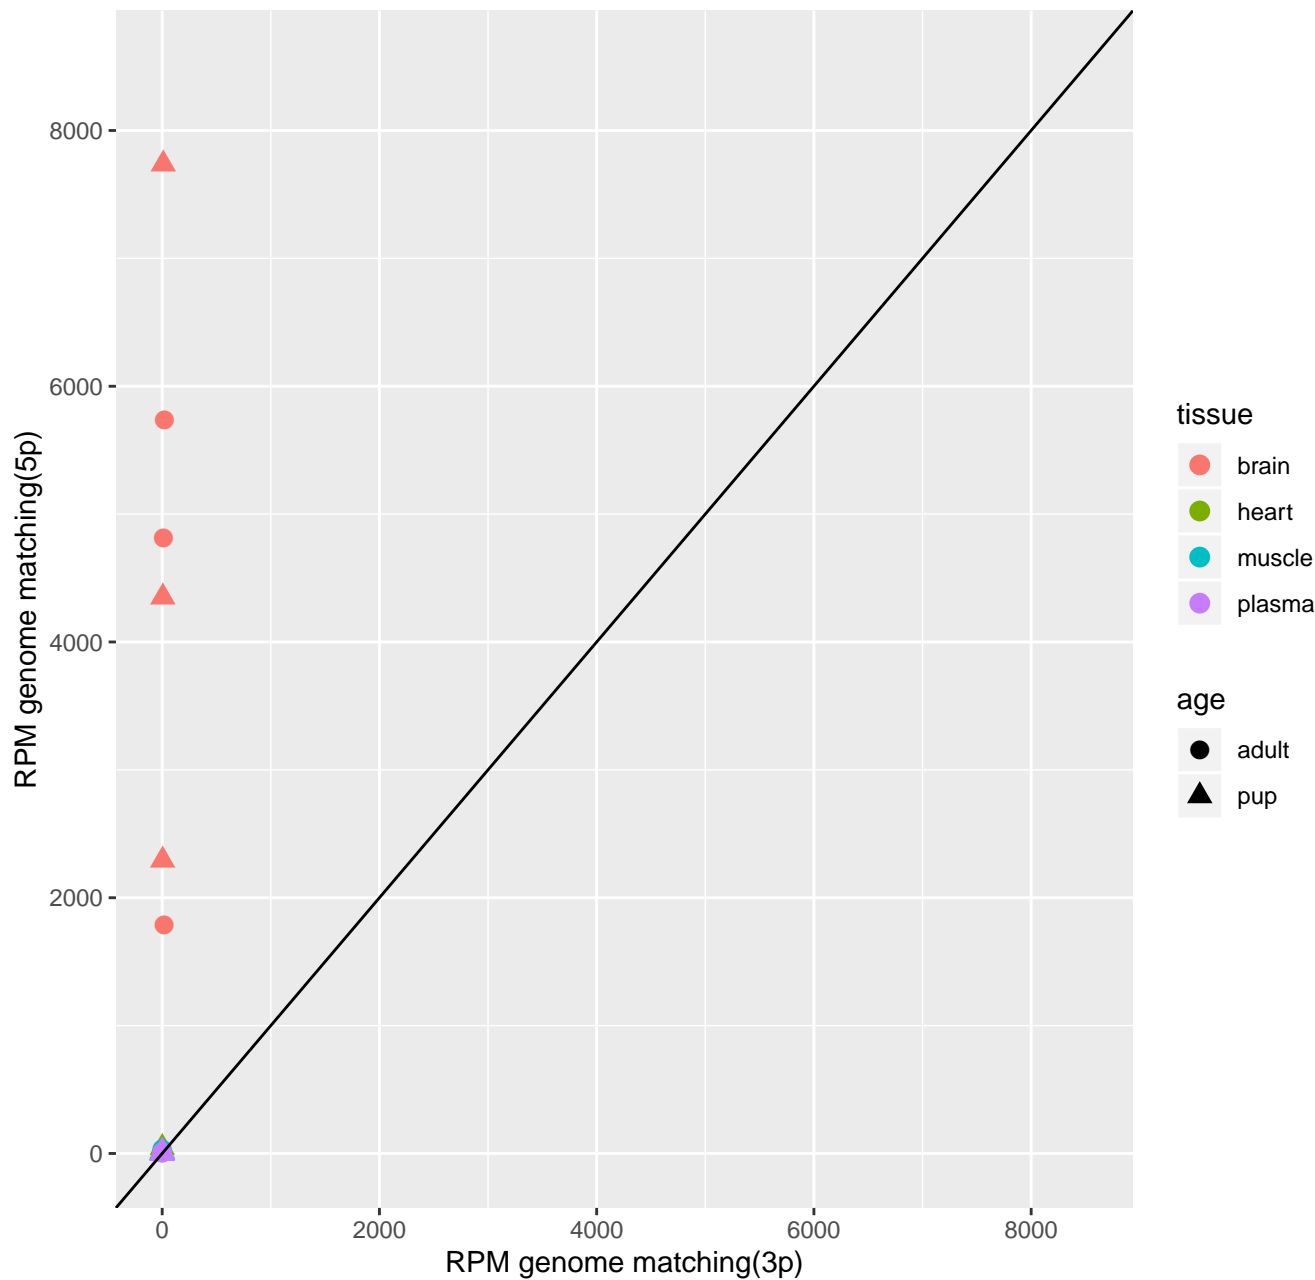

novel\_99

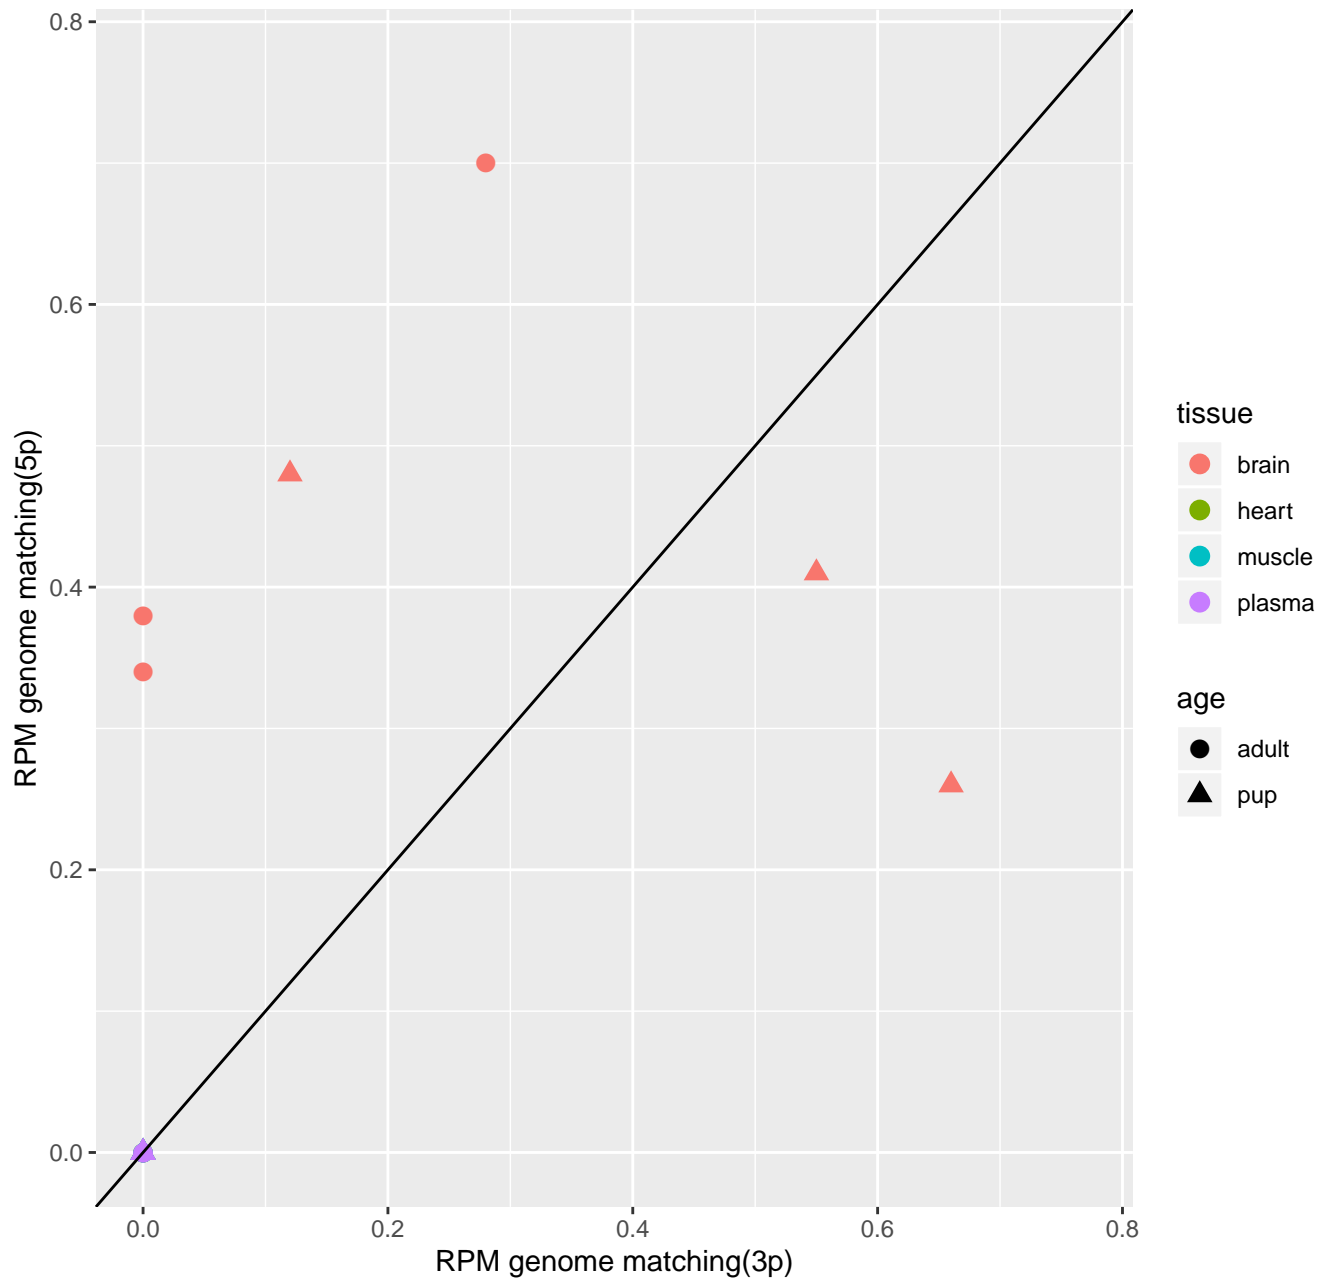



novel\_100

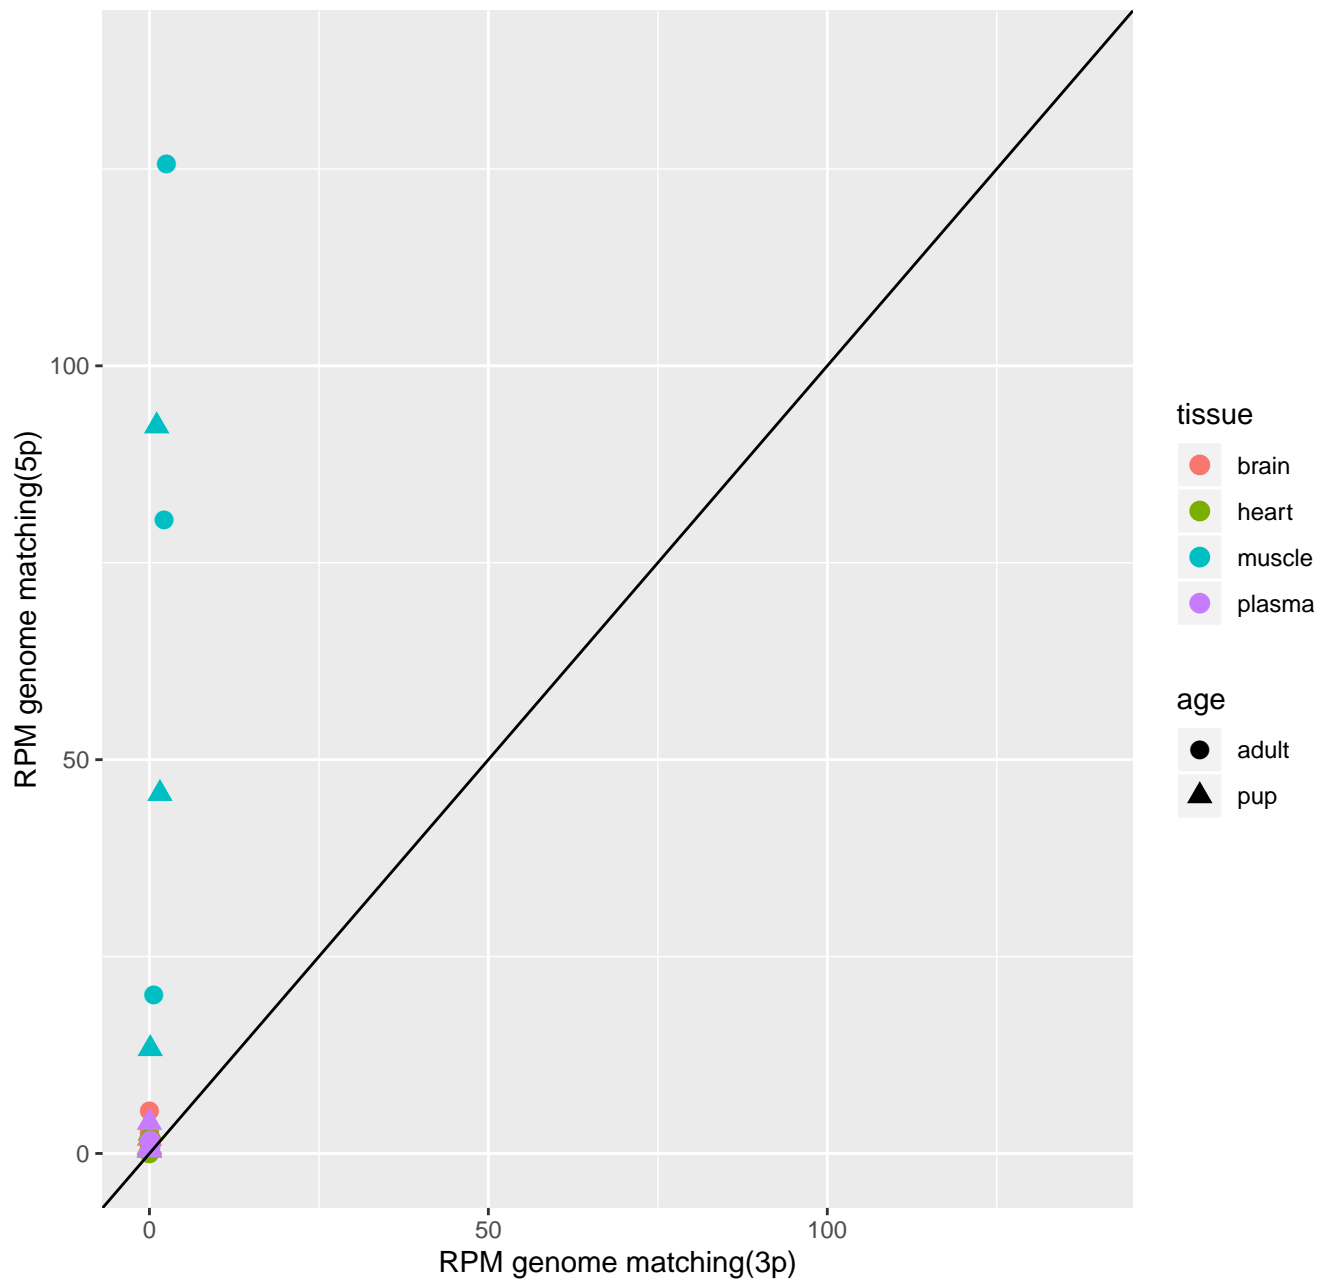



## lwe-miR-28\_loc1

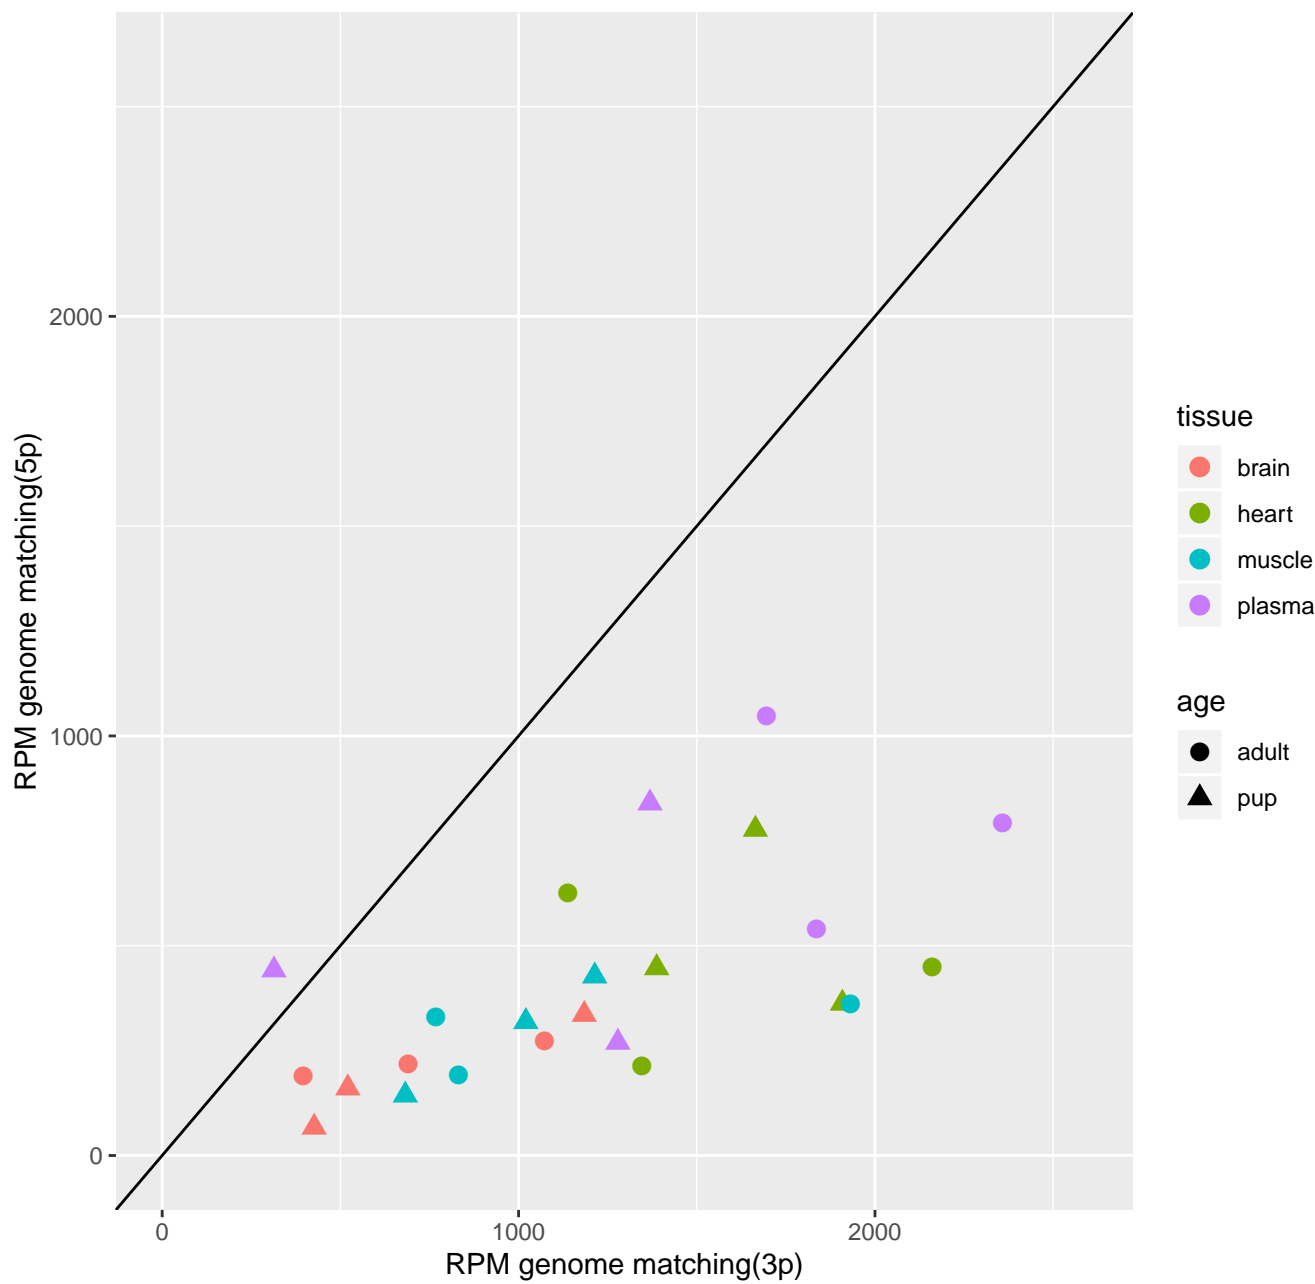

## lwe-miR-101a\_loc1

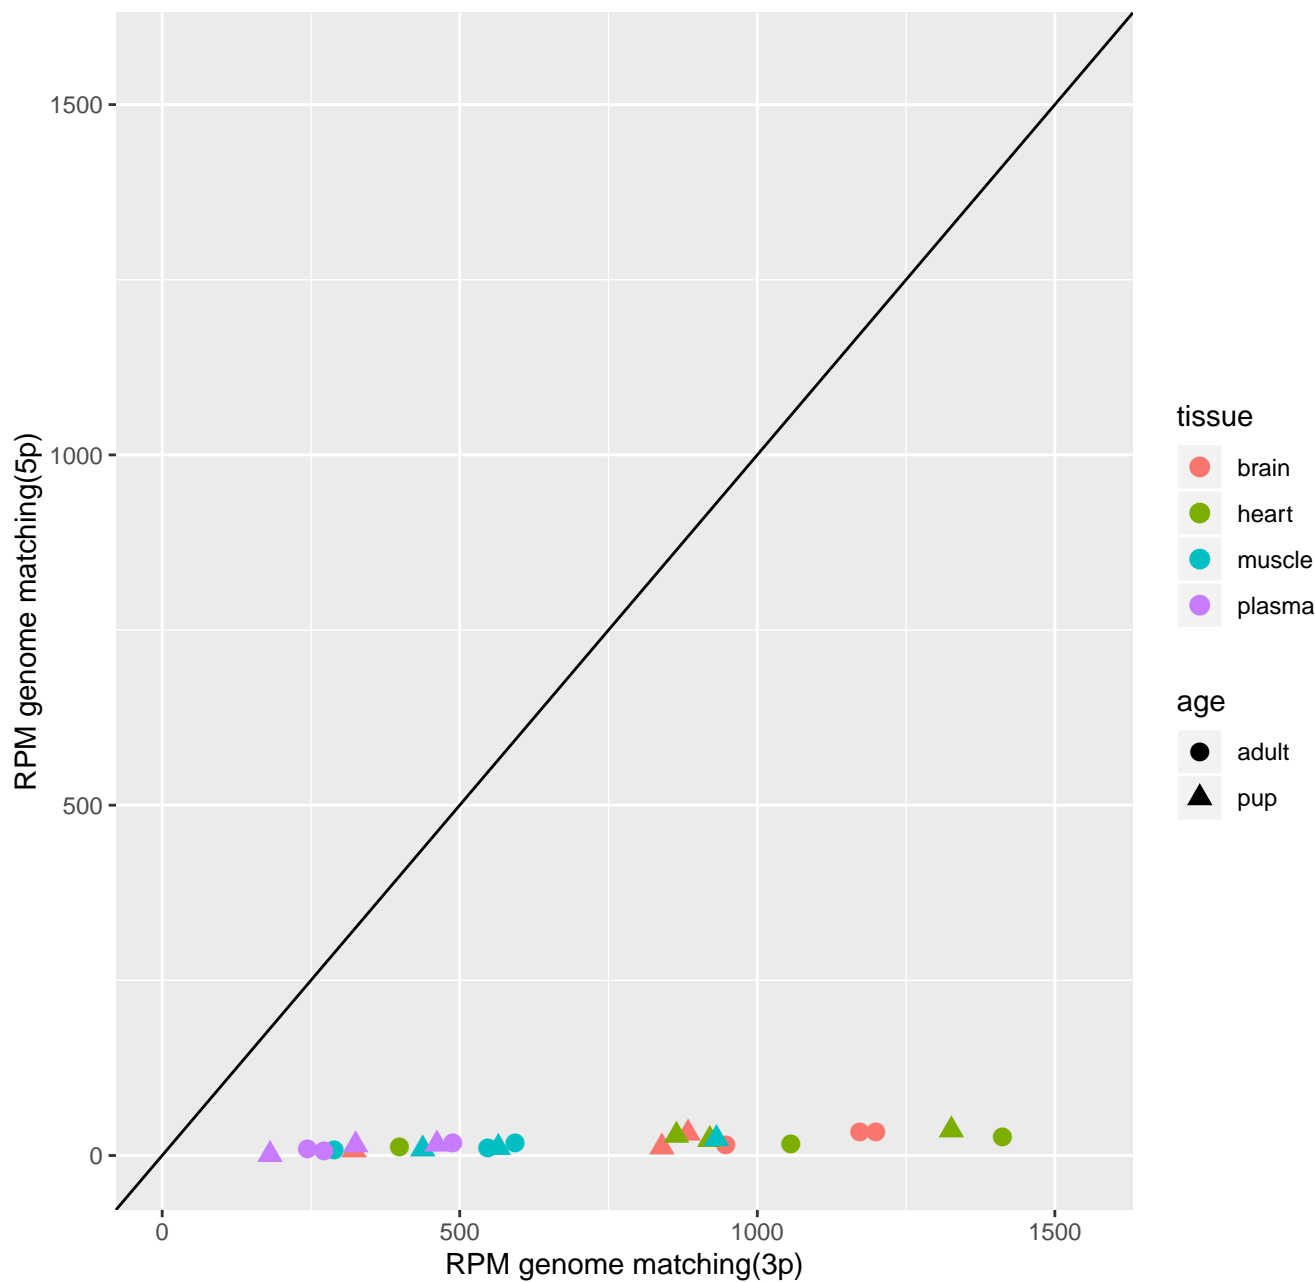

# novel\_101

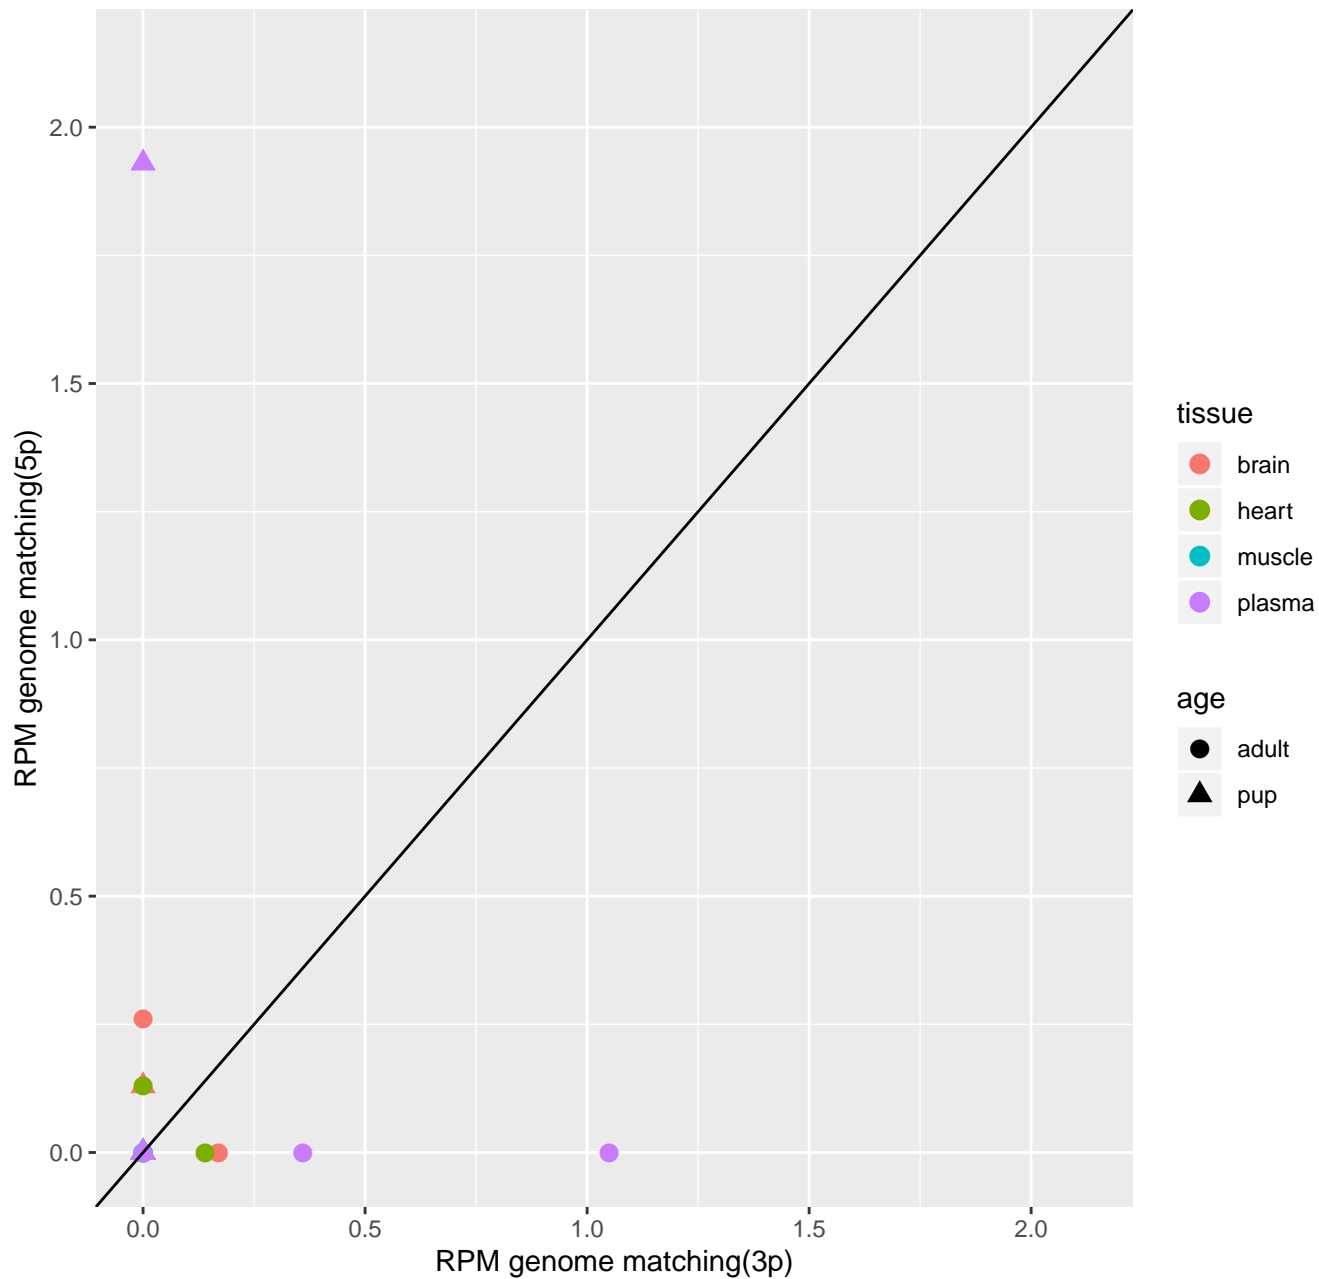

## novel\_102

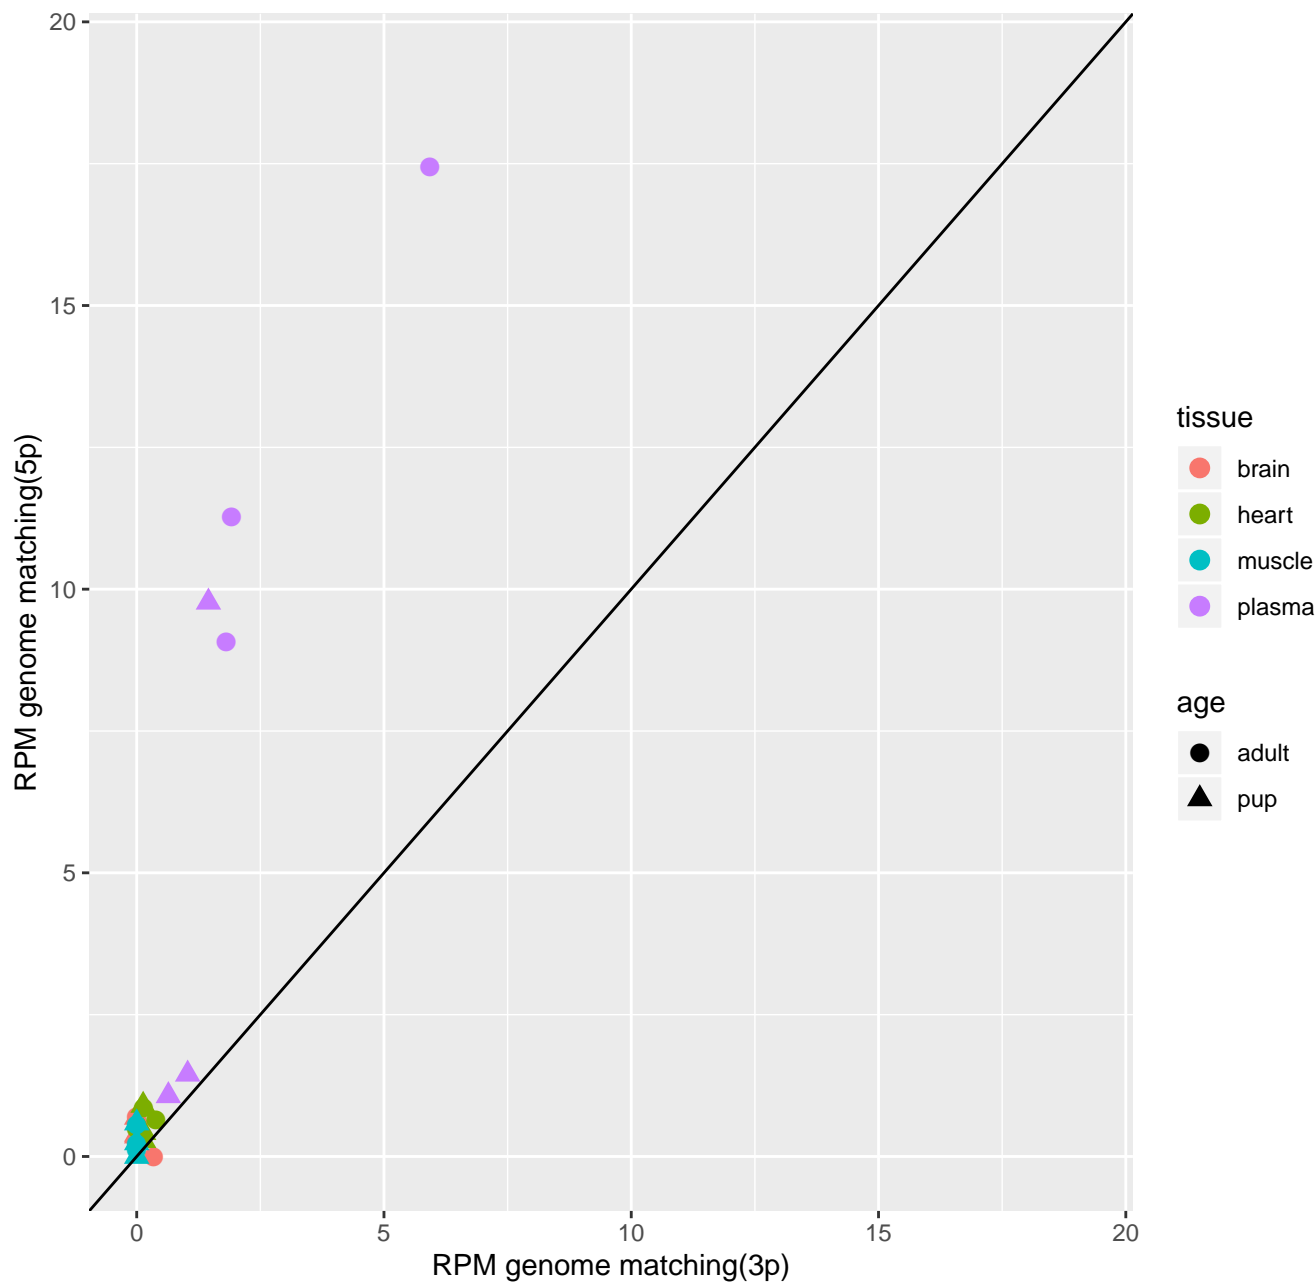

# lwe-miR-2387\_loc1

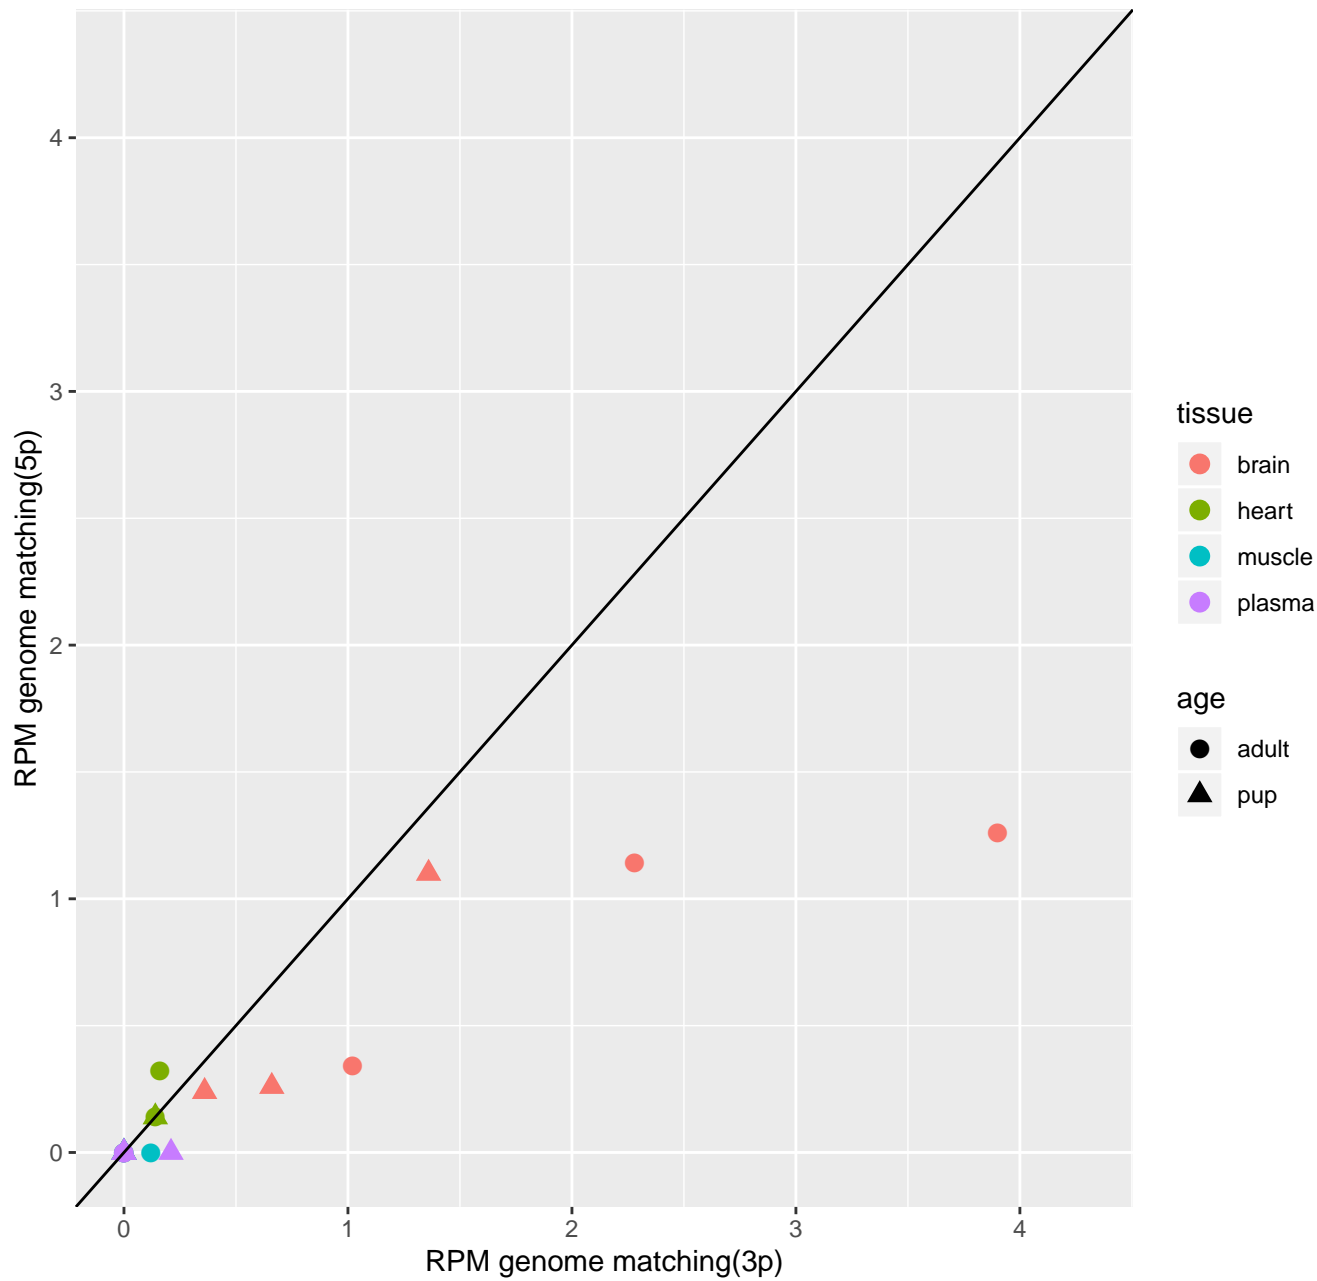

## lwe-miR-590\_loc1

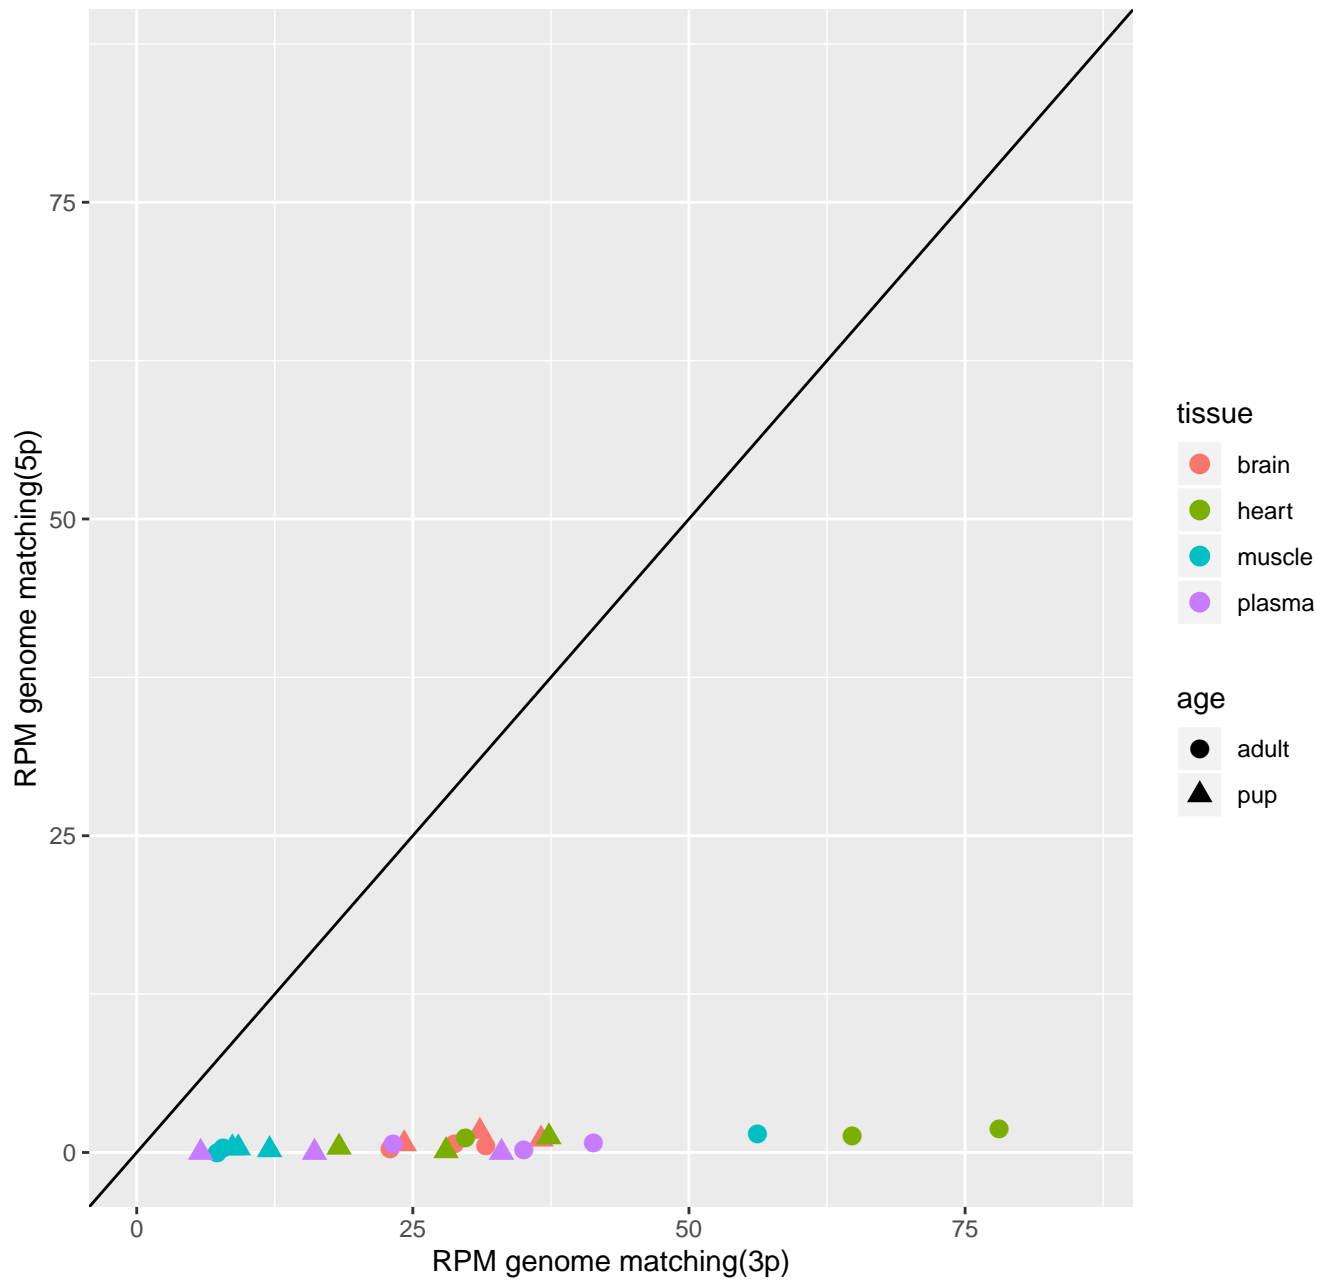

## novel\_103

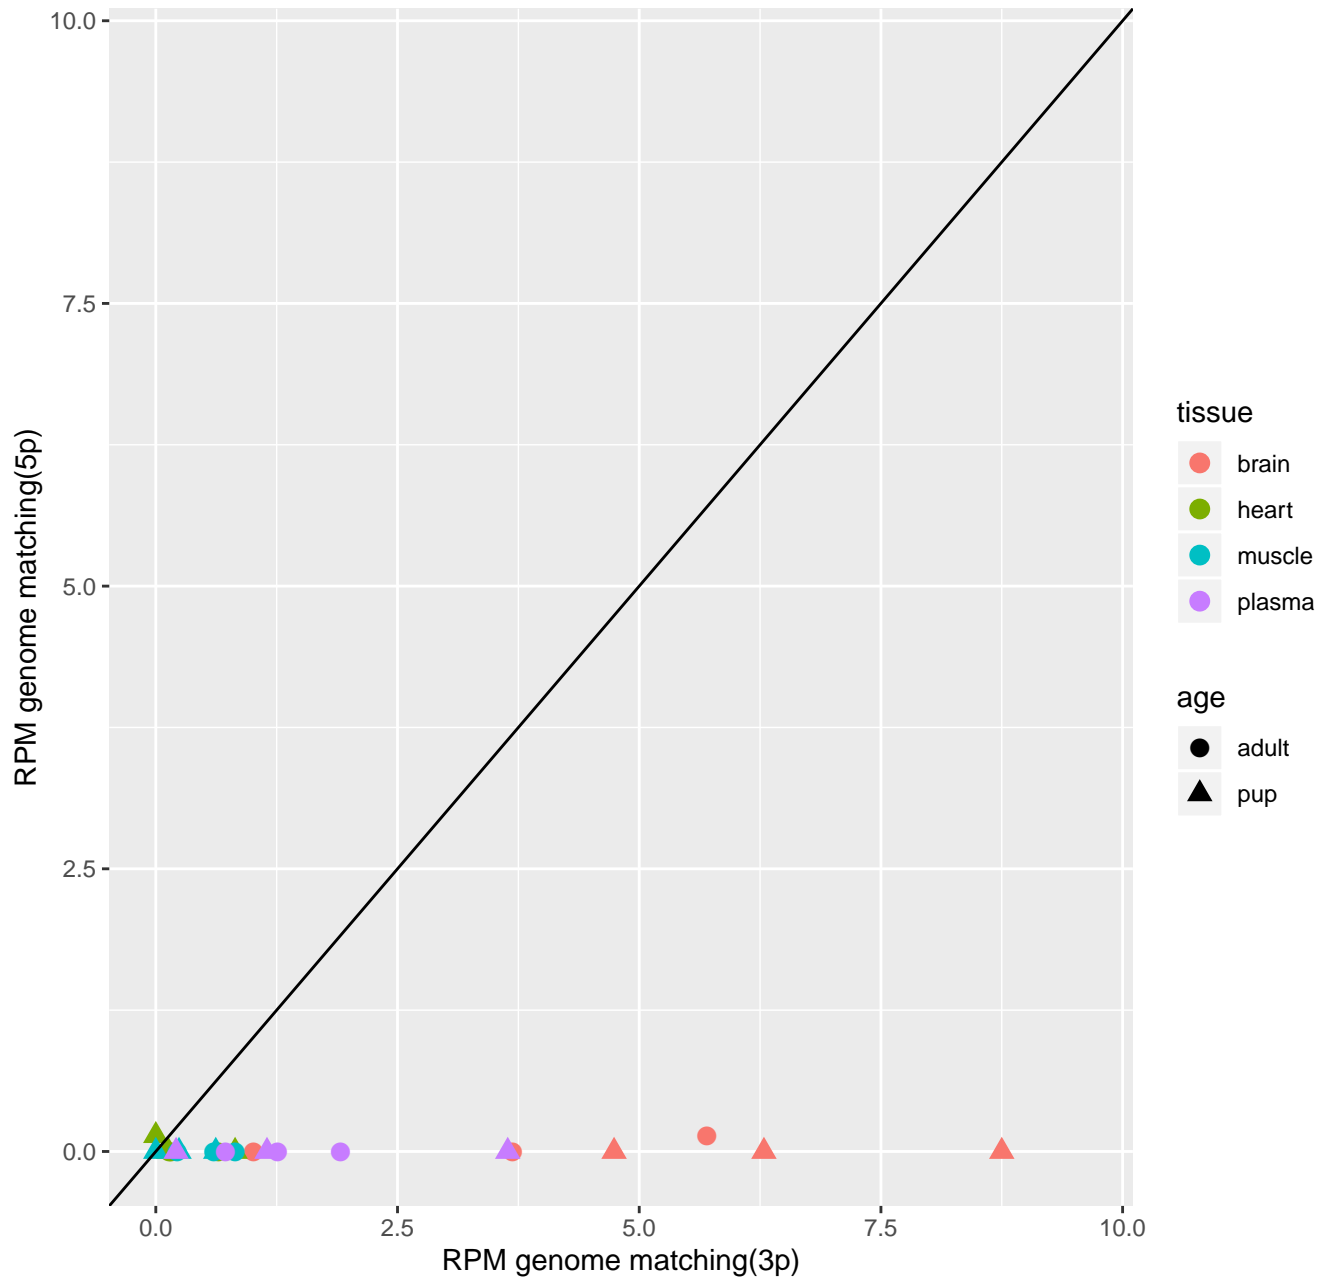

# novel\_104

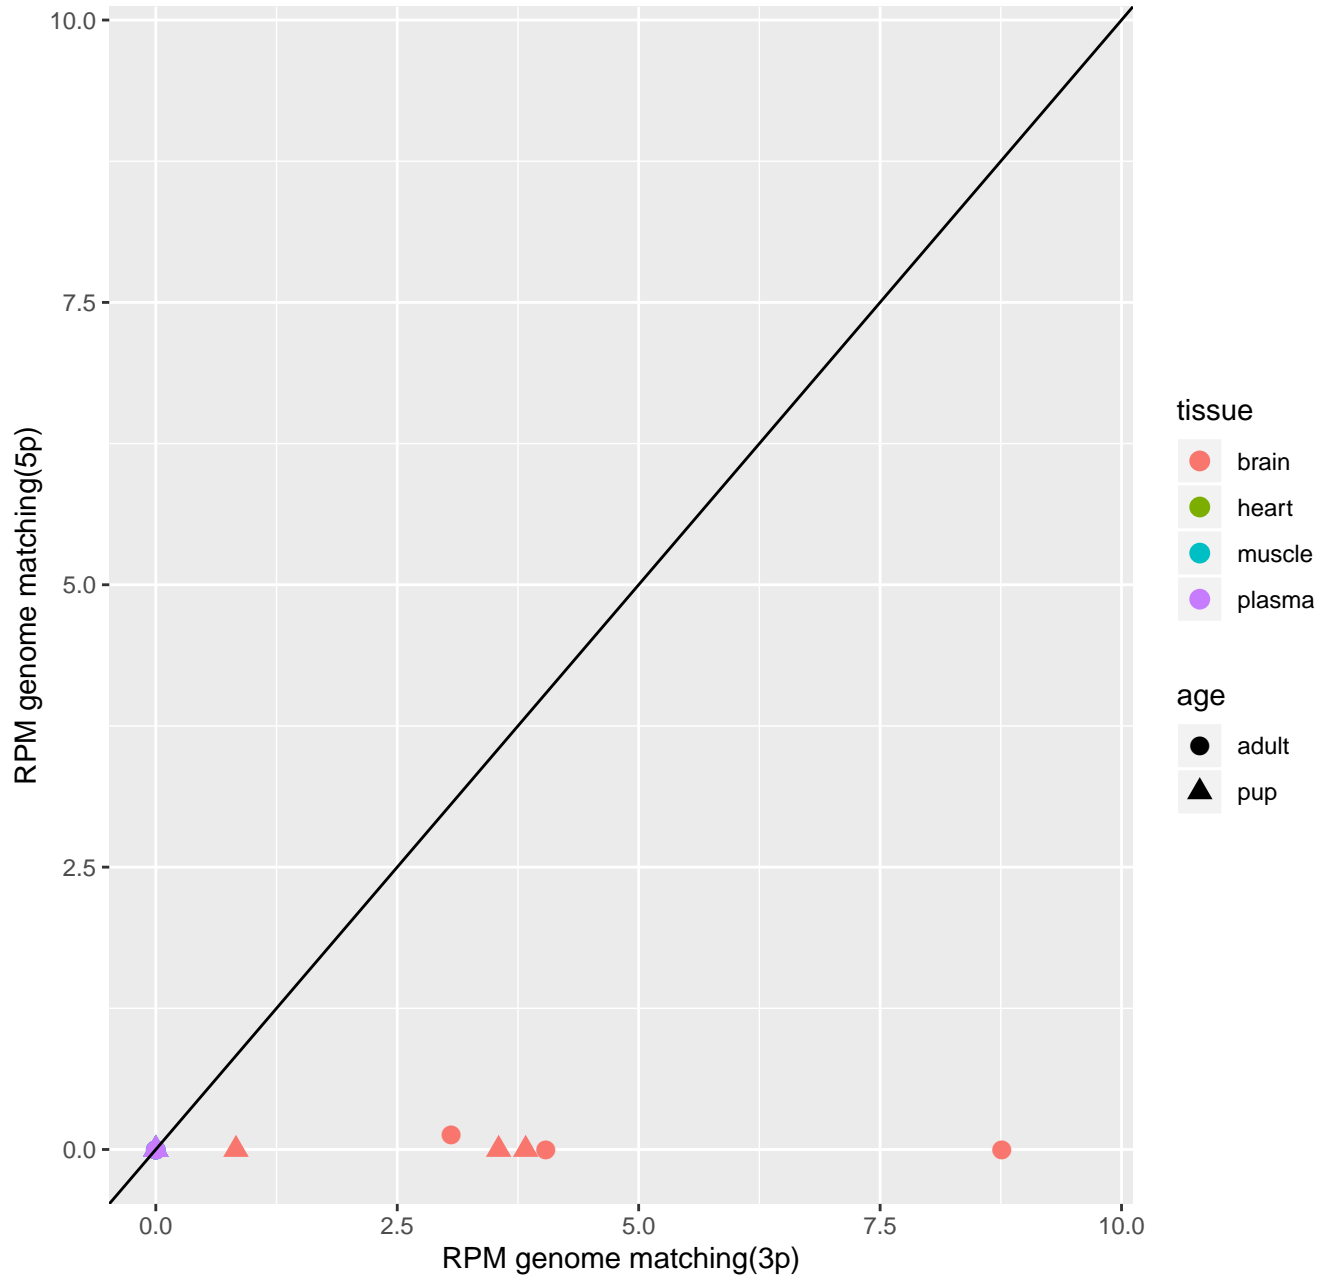



## novel\_105

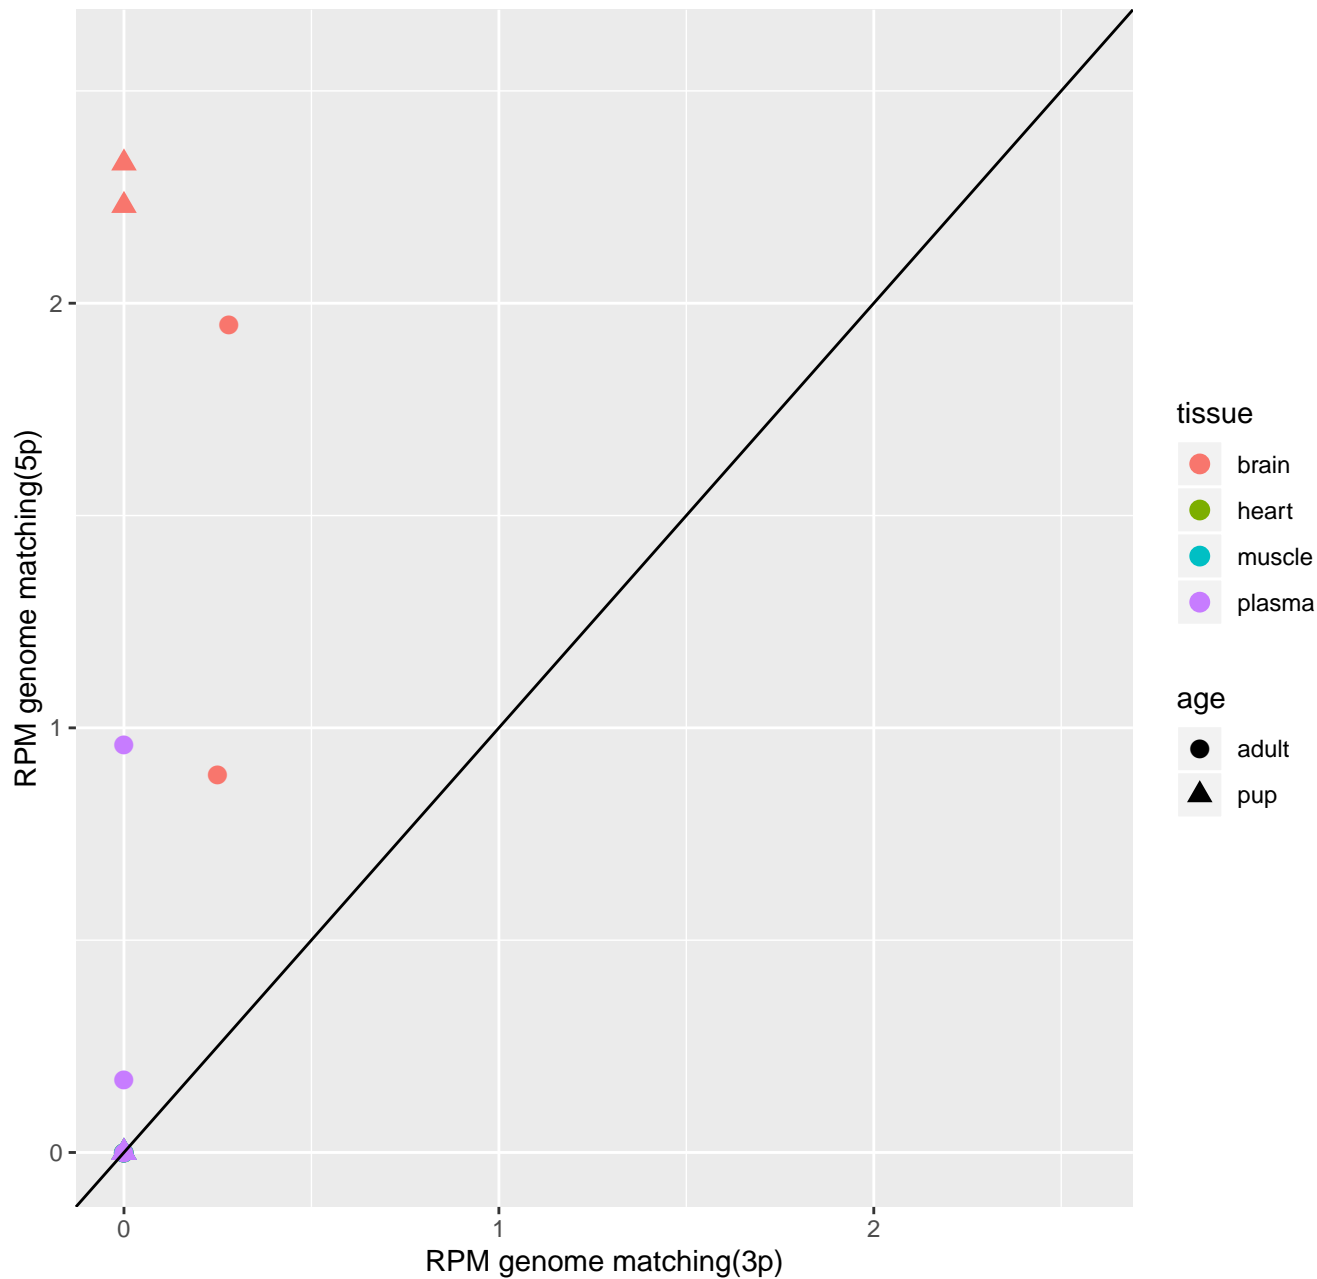

## novel\_106

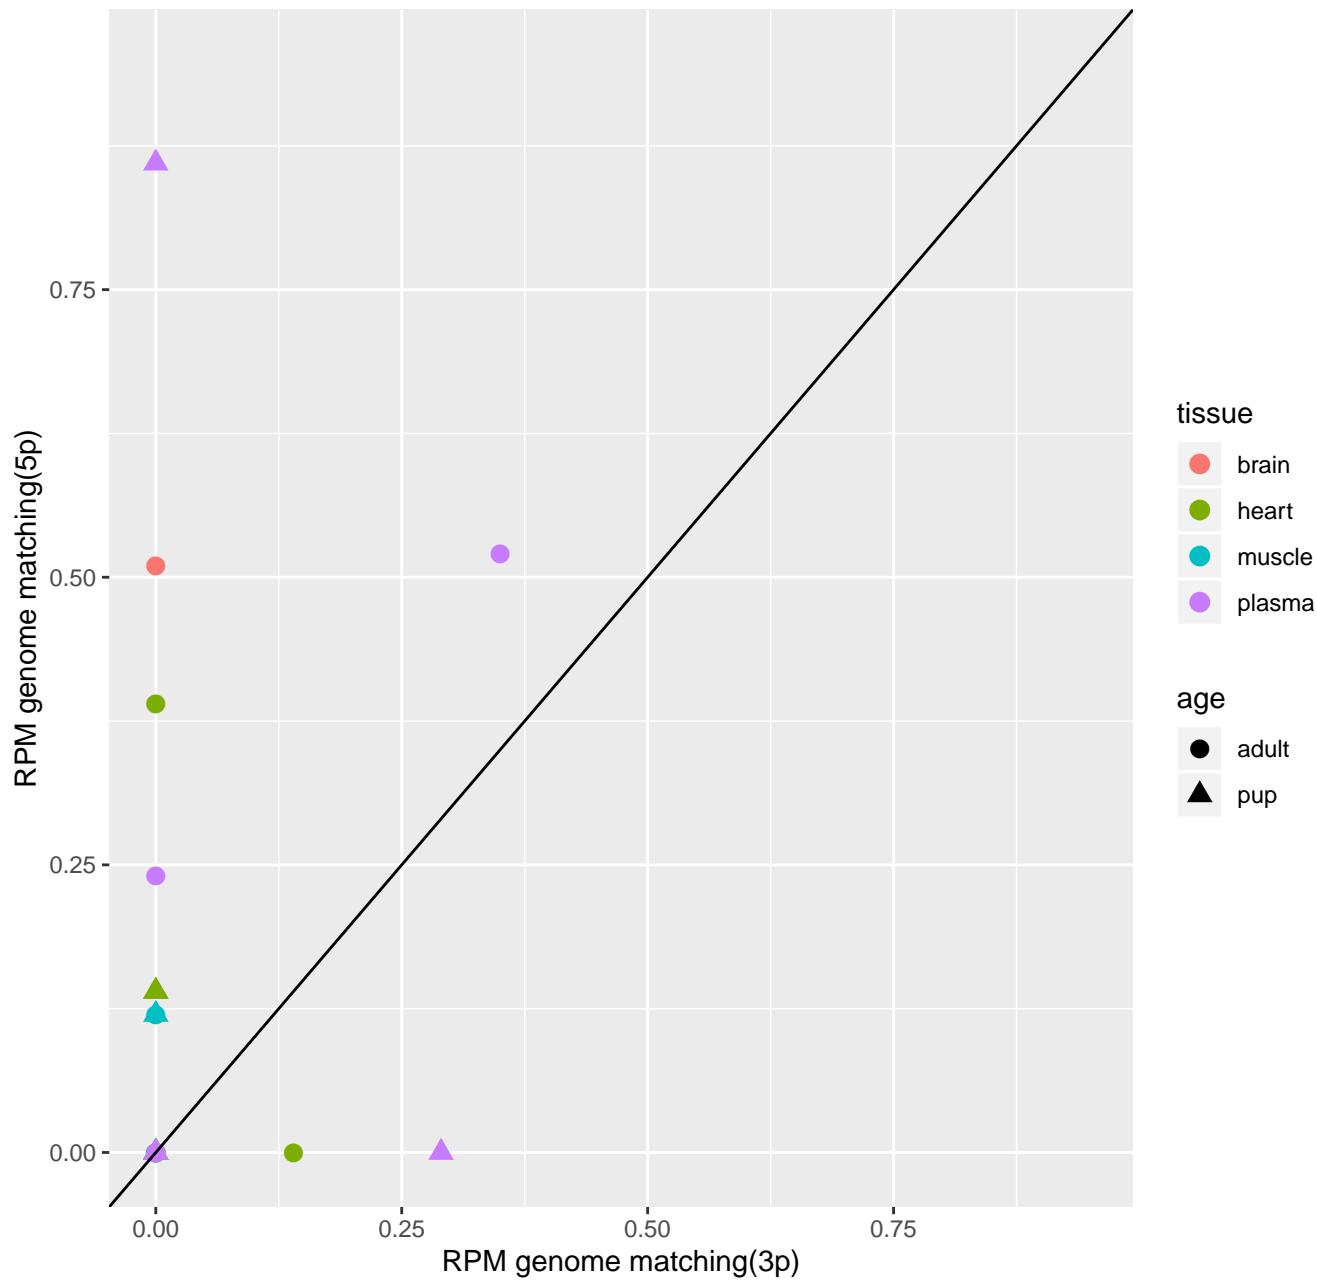

## novel\_107

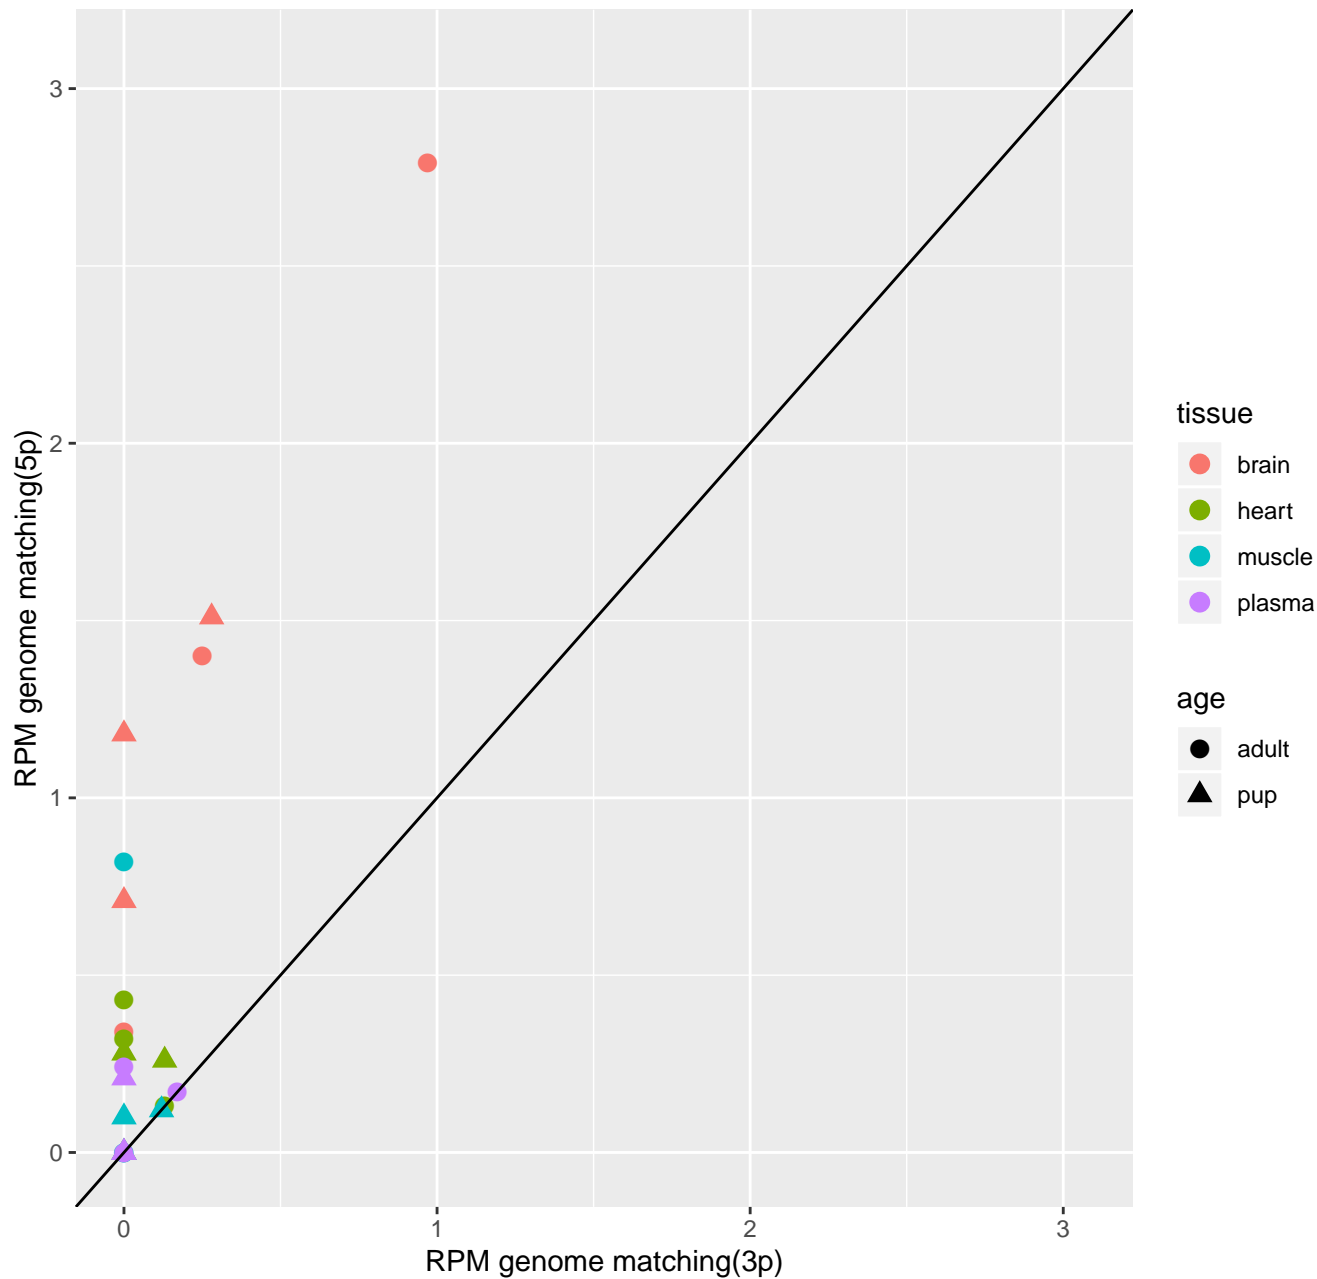

## lwe-miR-135\_loc3

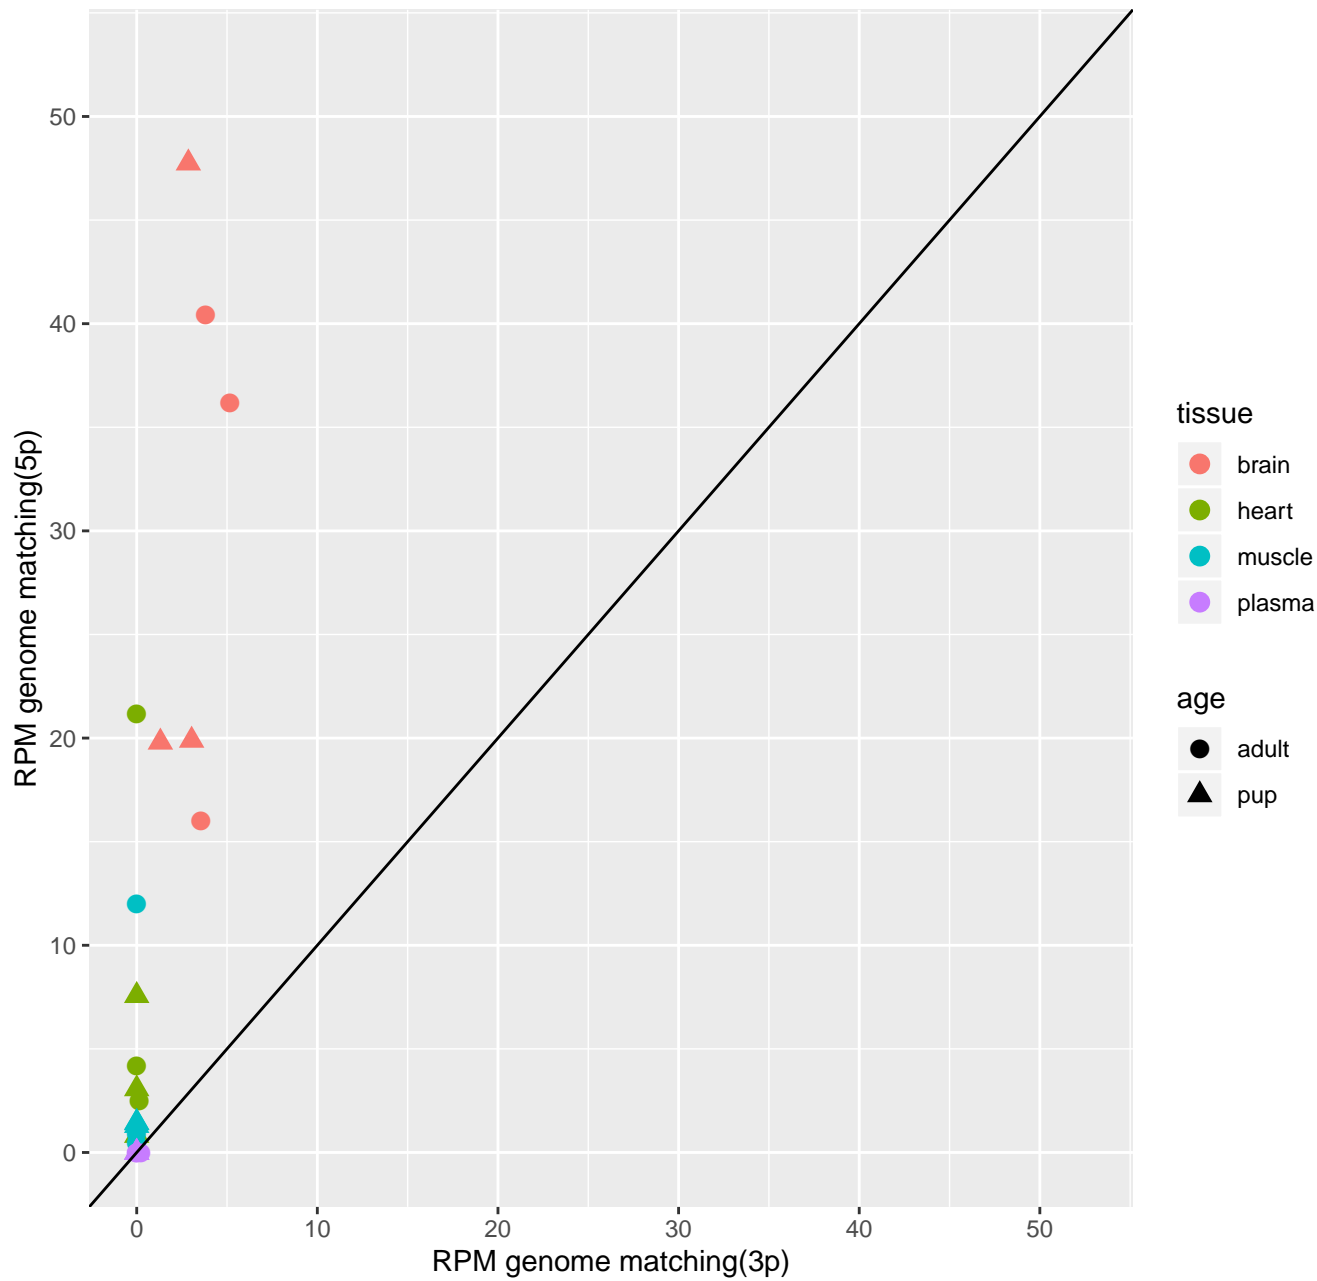

## novel\_108

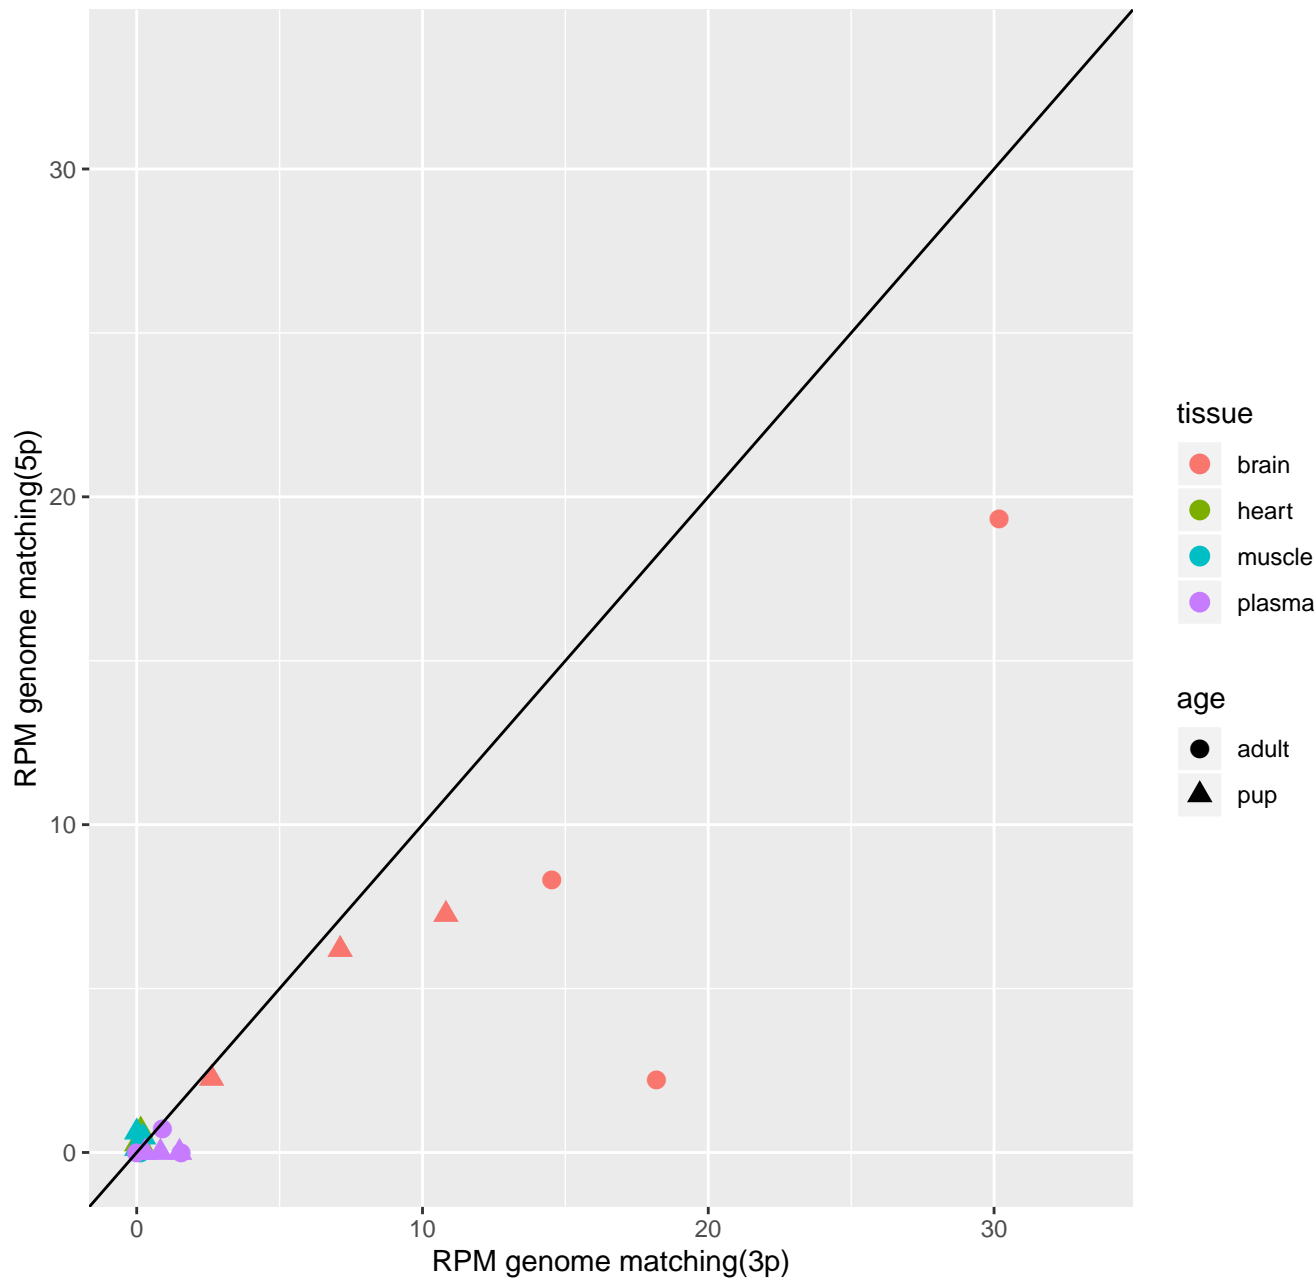

## novel\_109

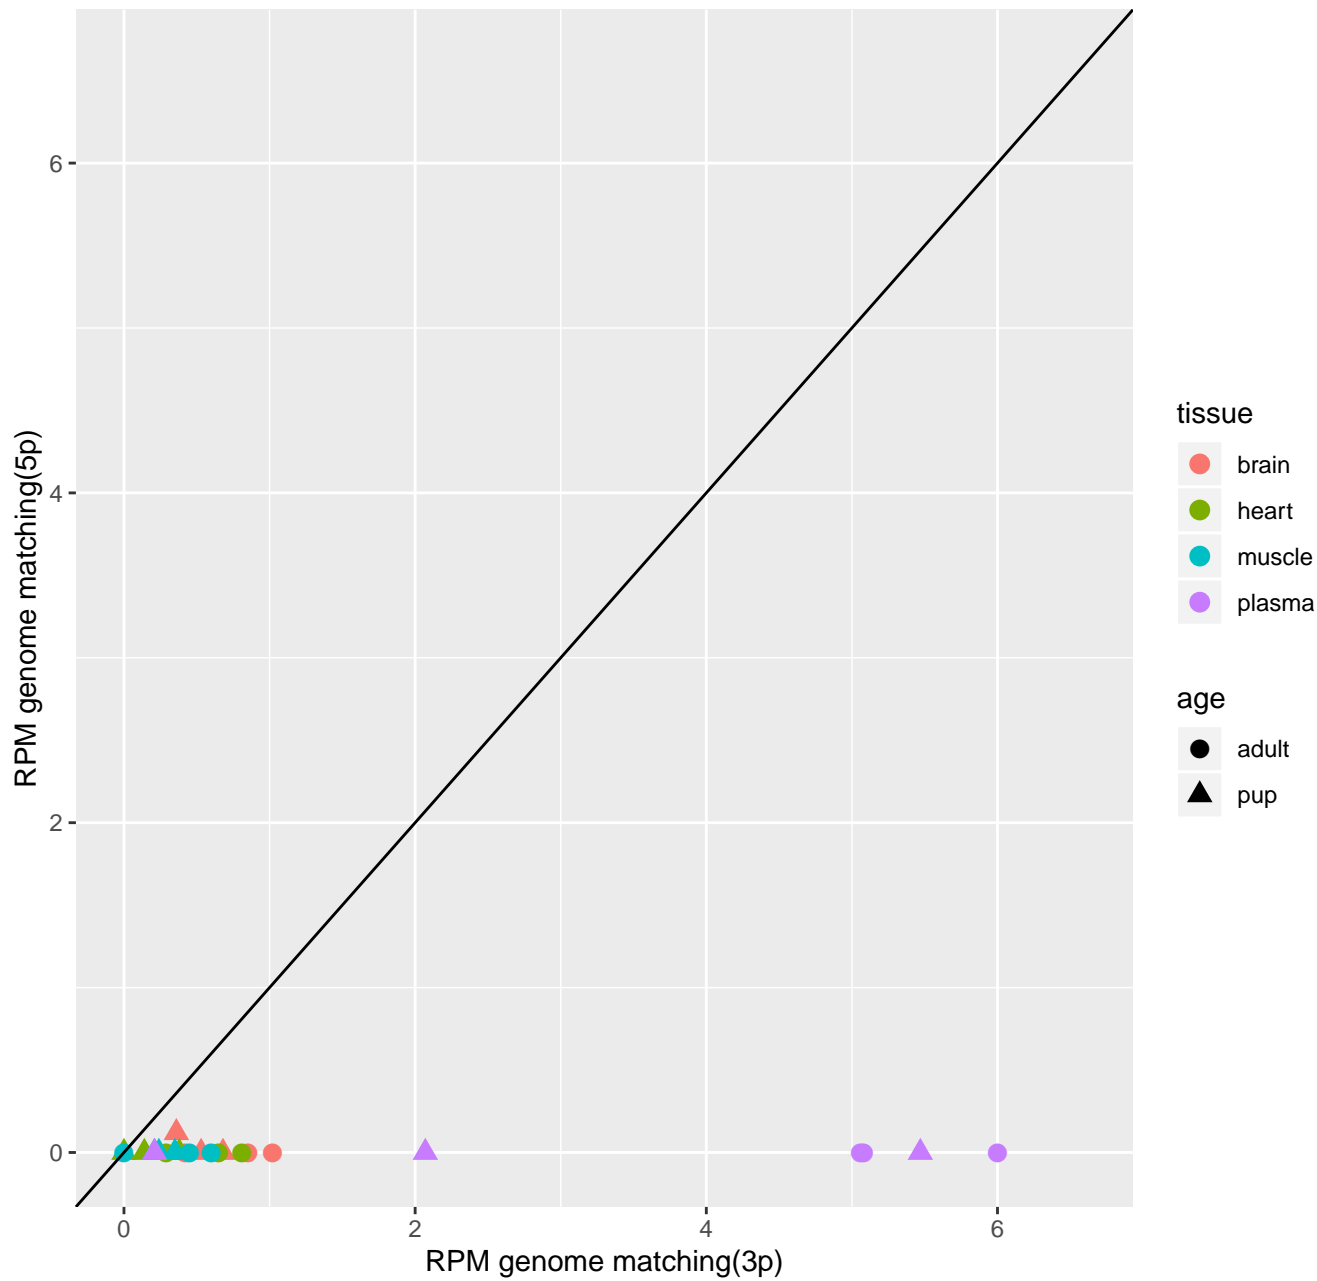

## novel\_110

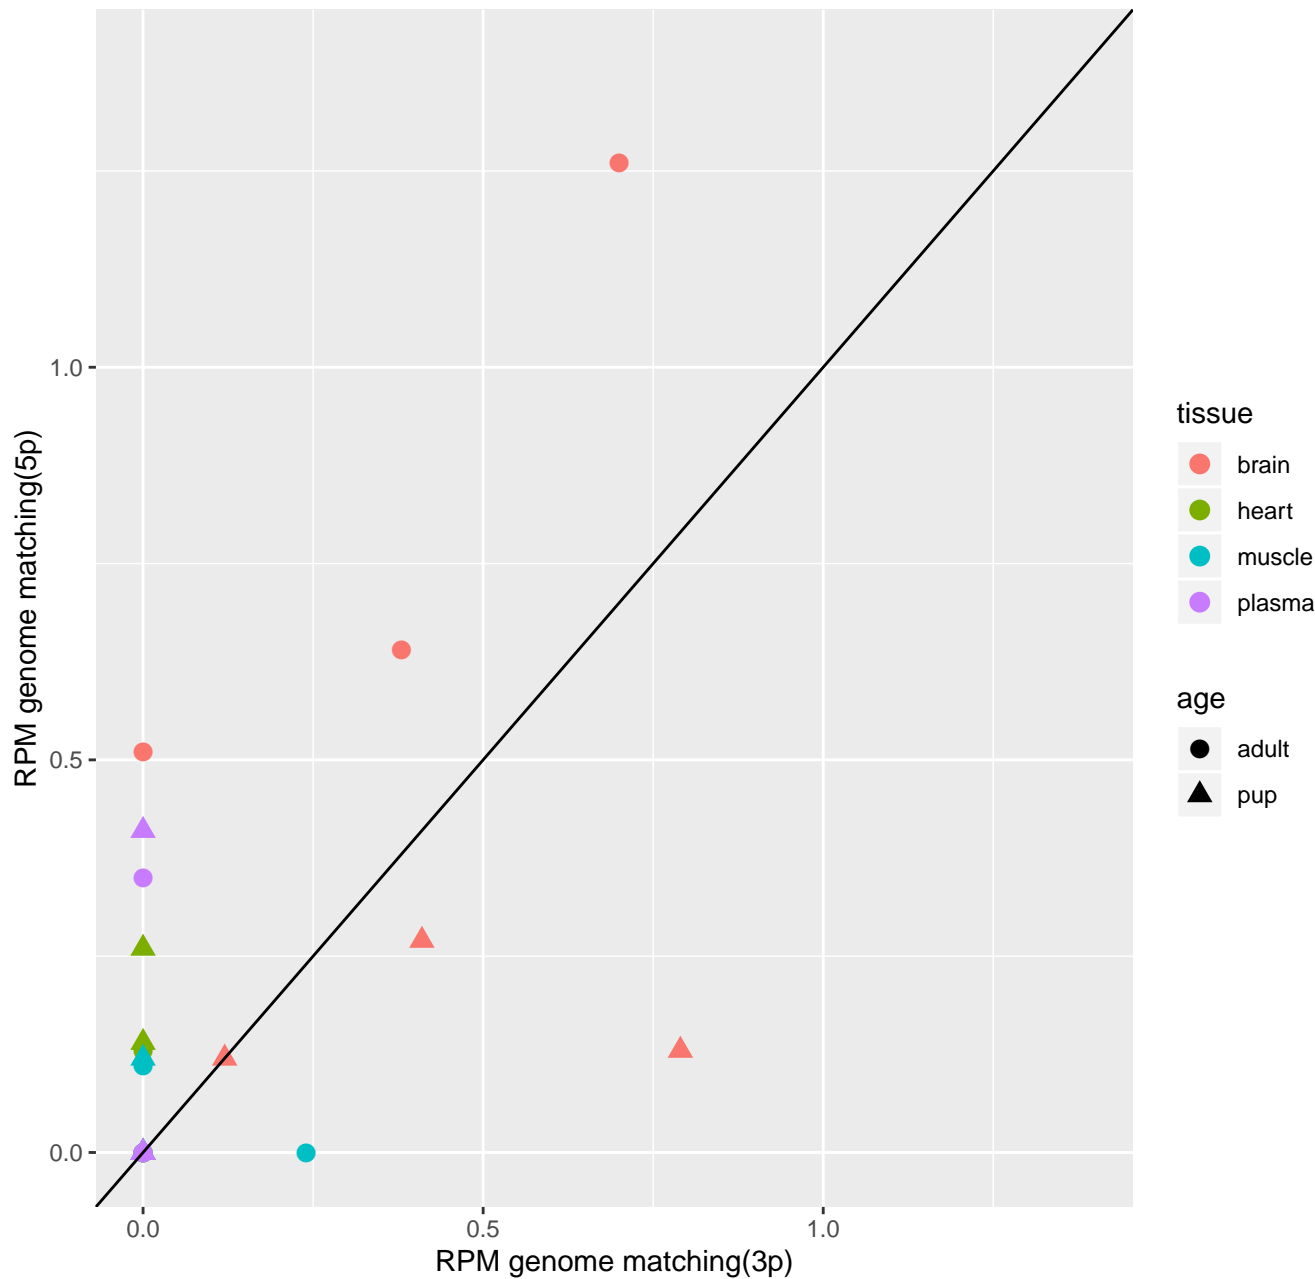

## lwe-miR-505\_loc1

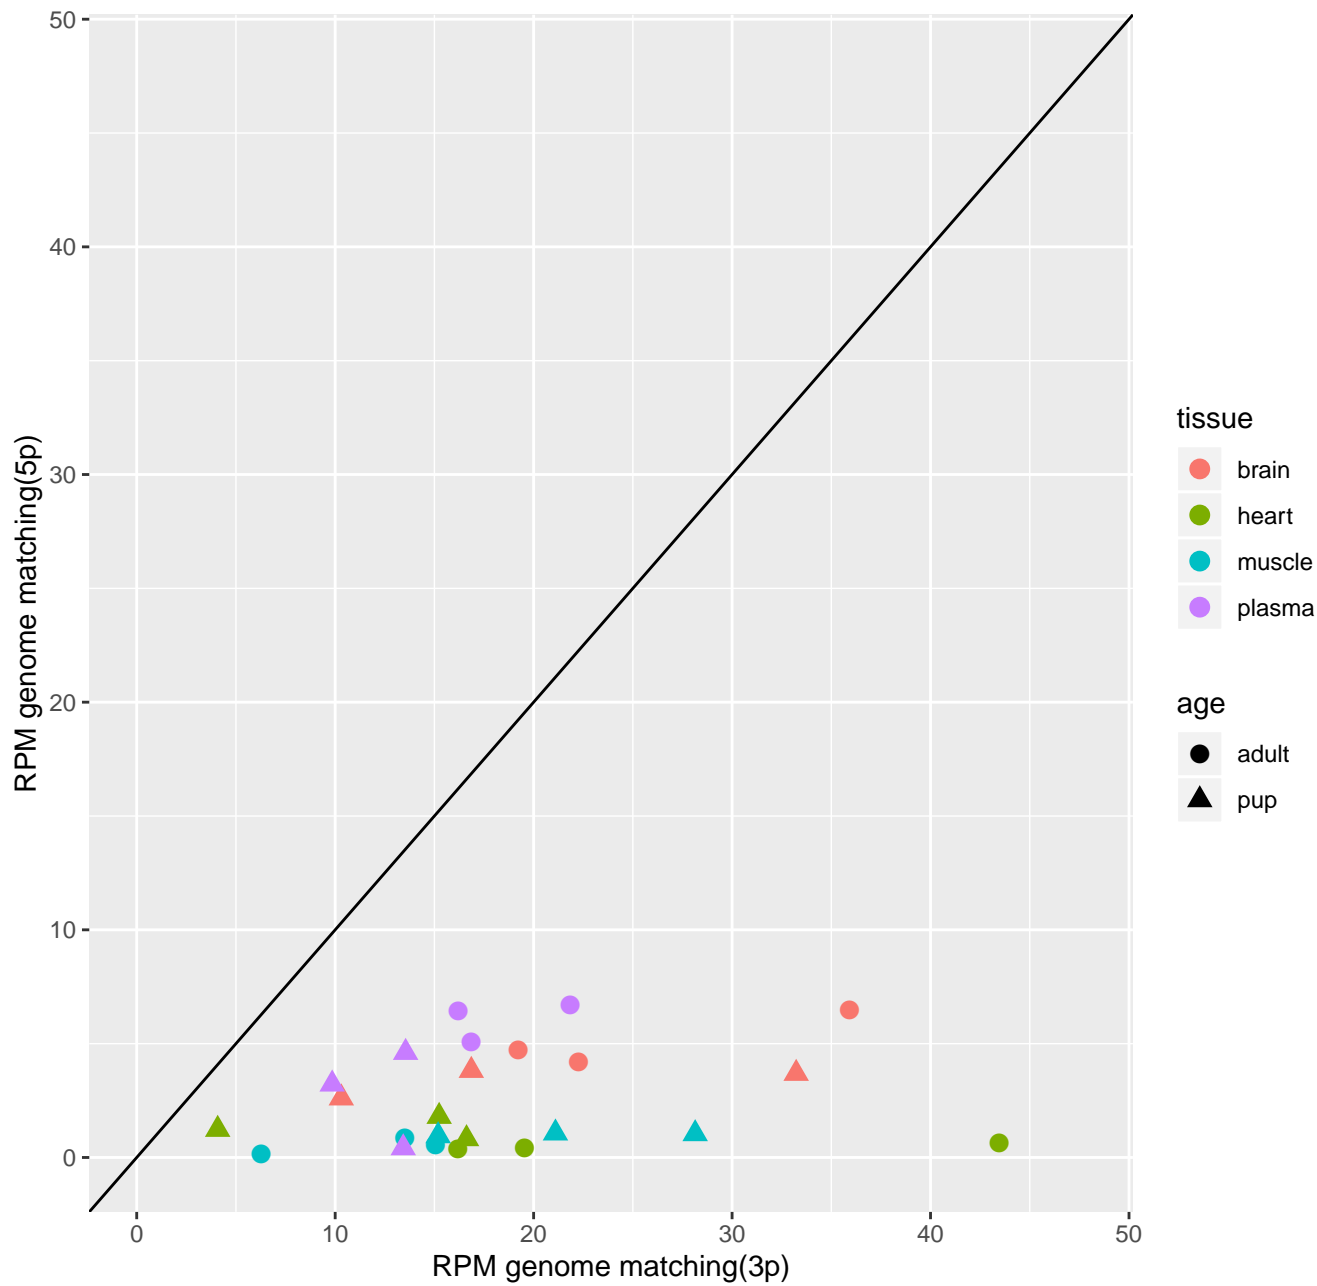



# novel\_111

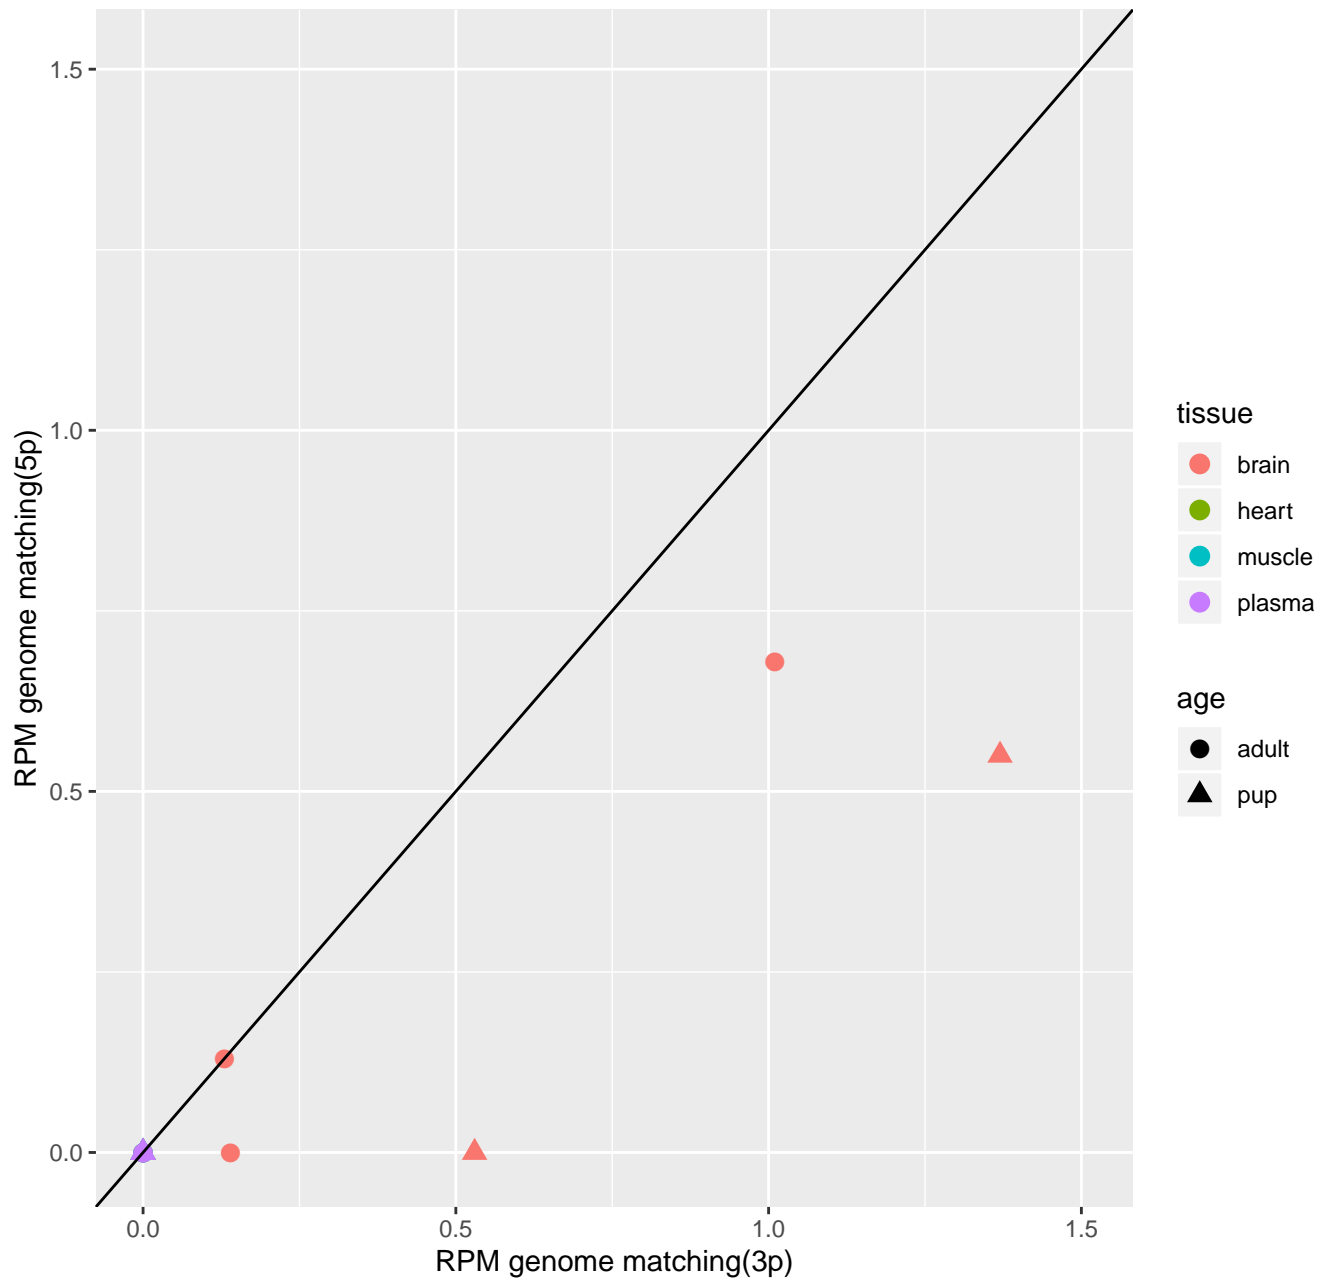

## novel\_113

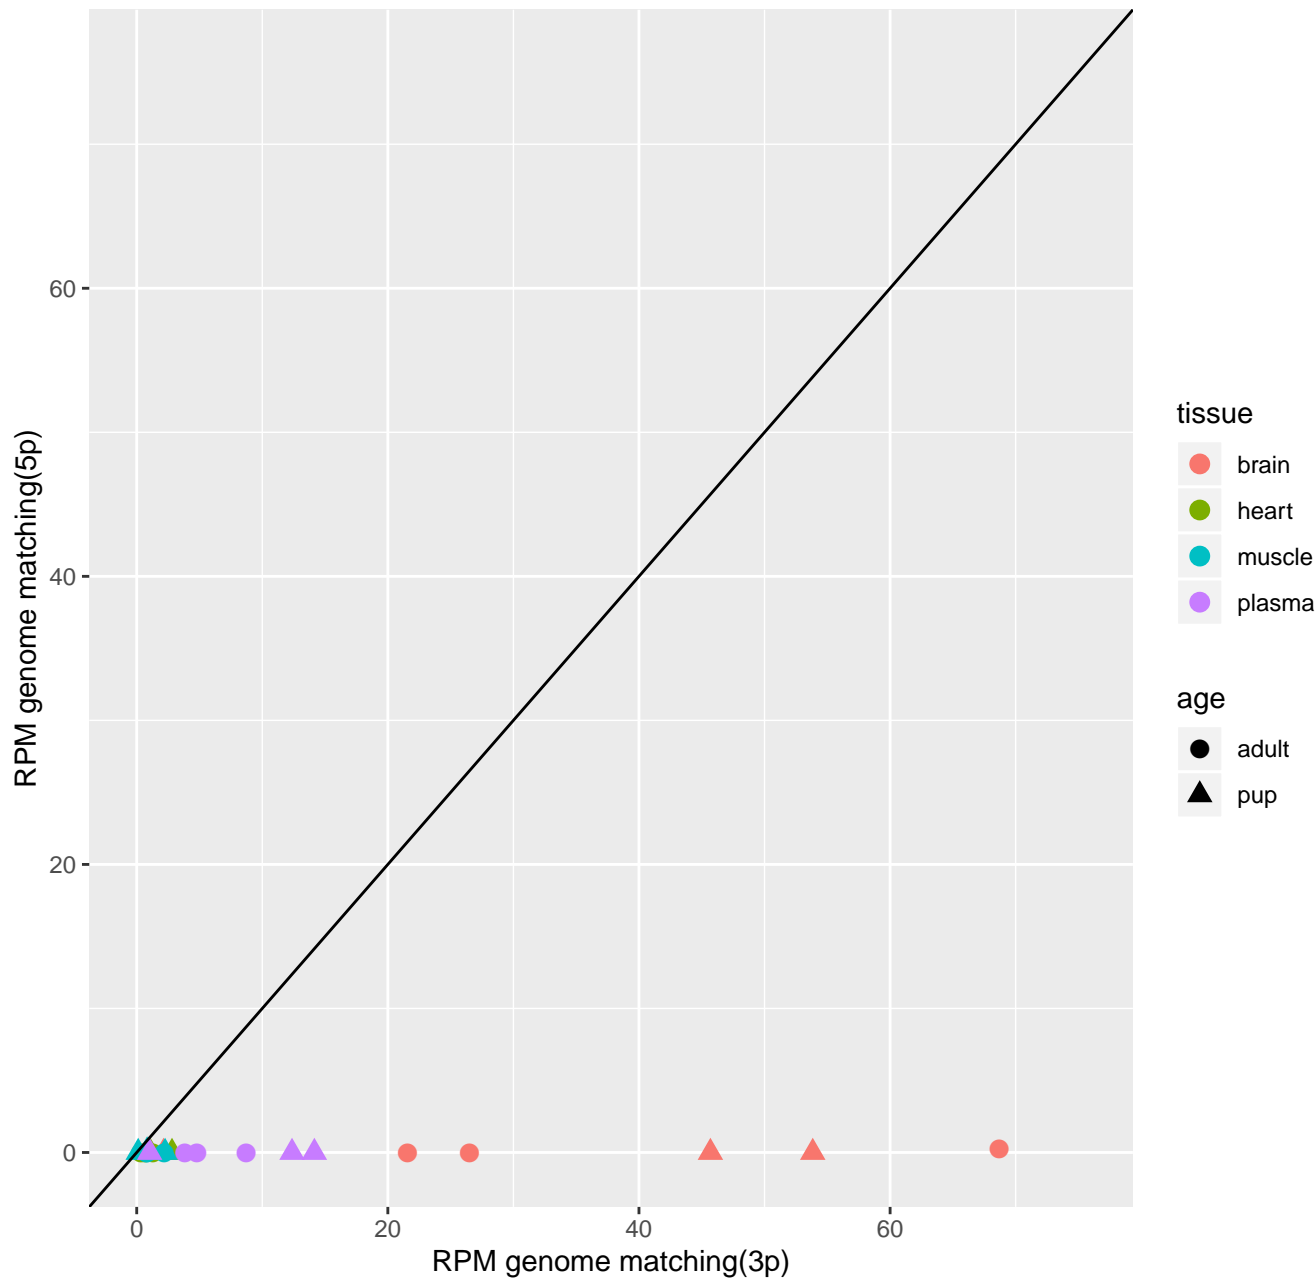

## novel\_112

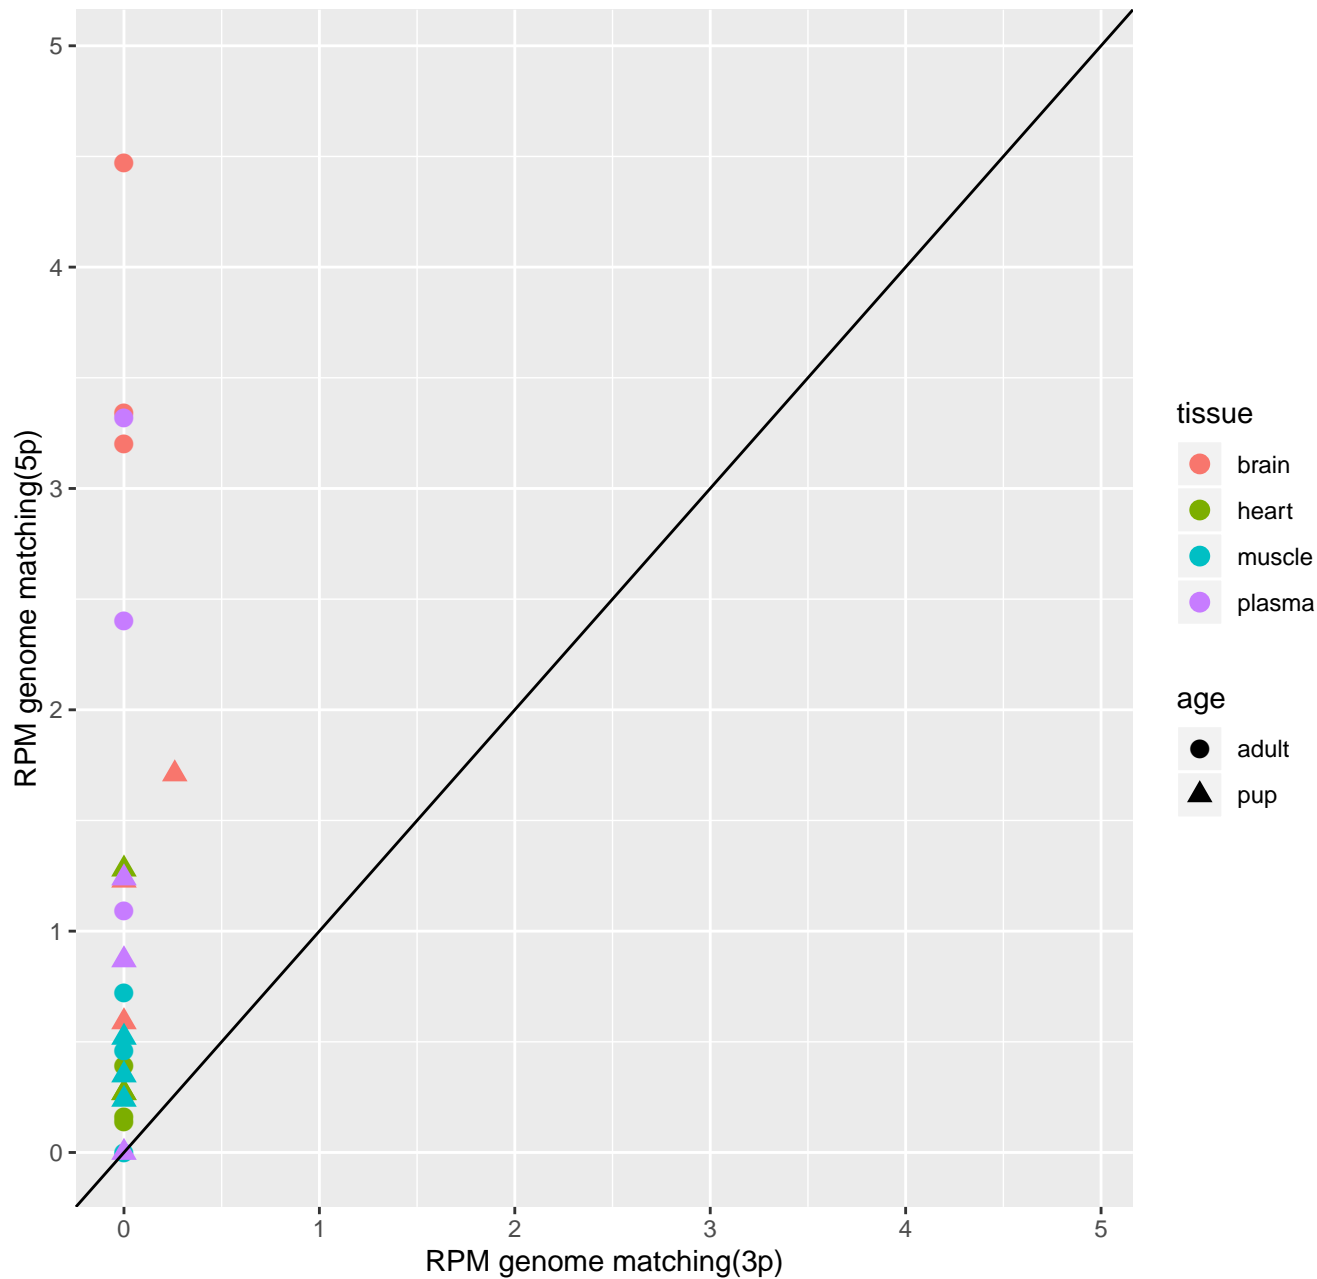

# lwe-miR-101a\_loc2

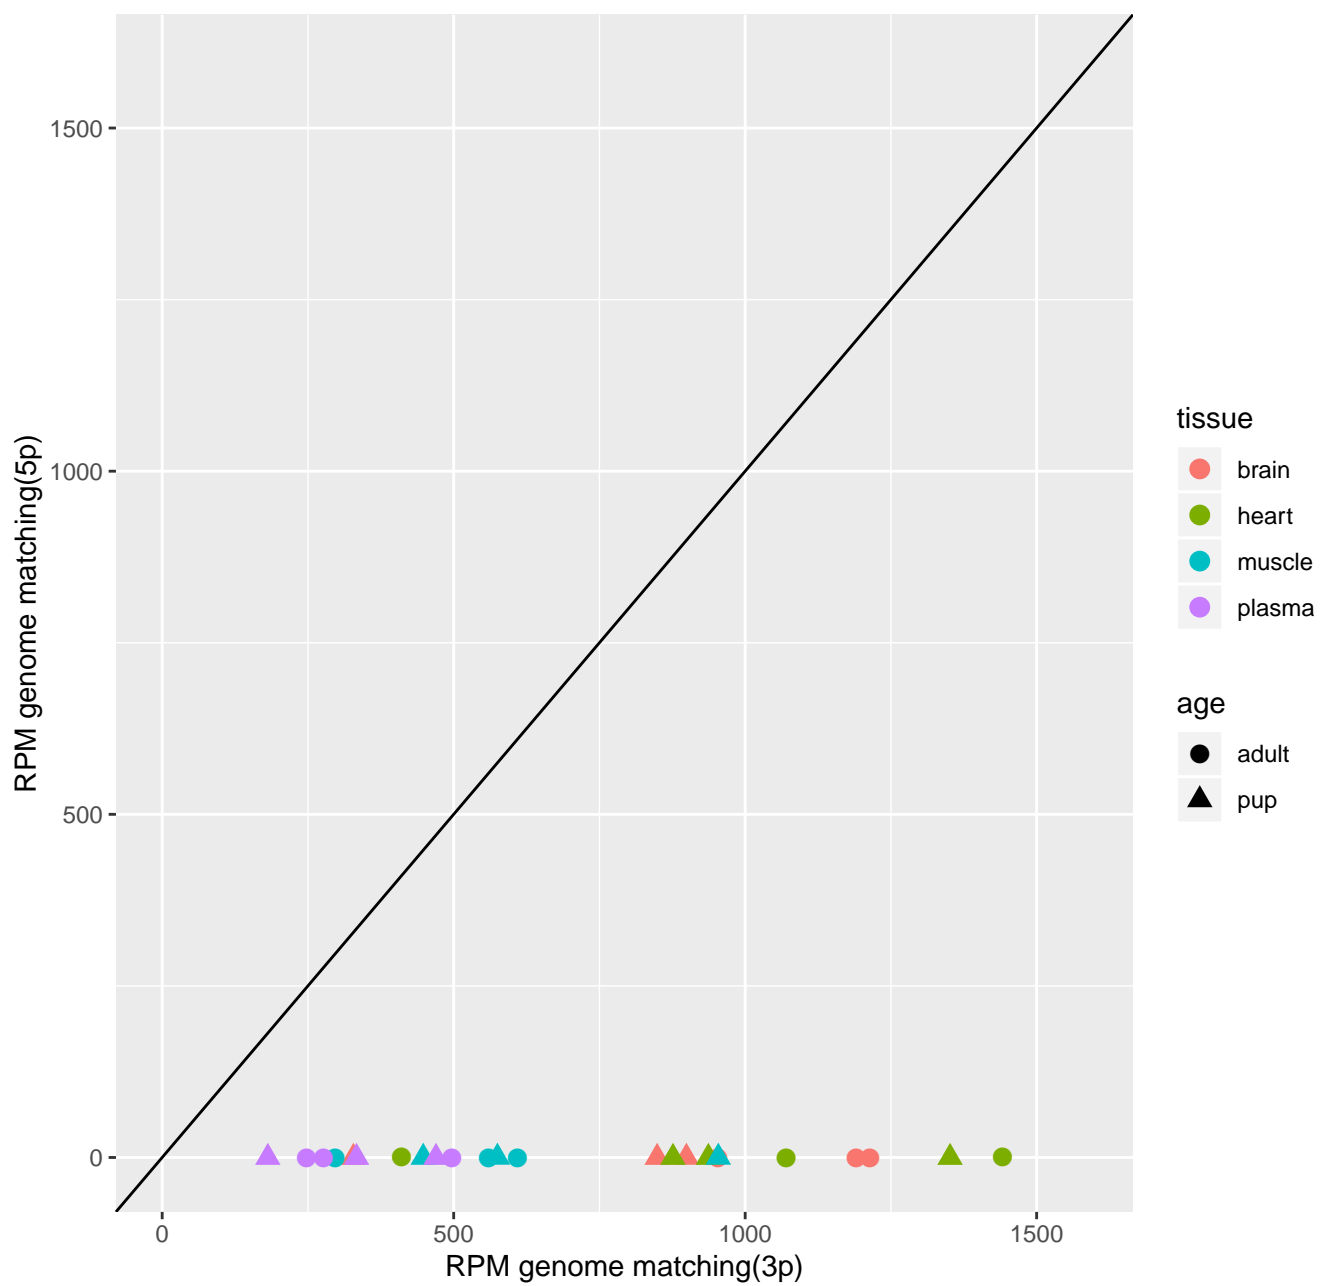

## novel\_114

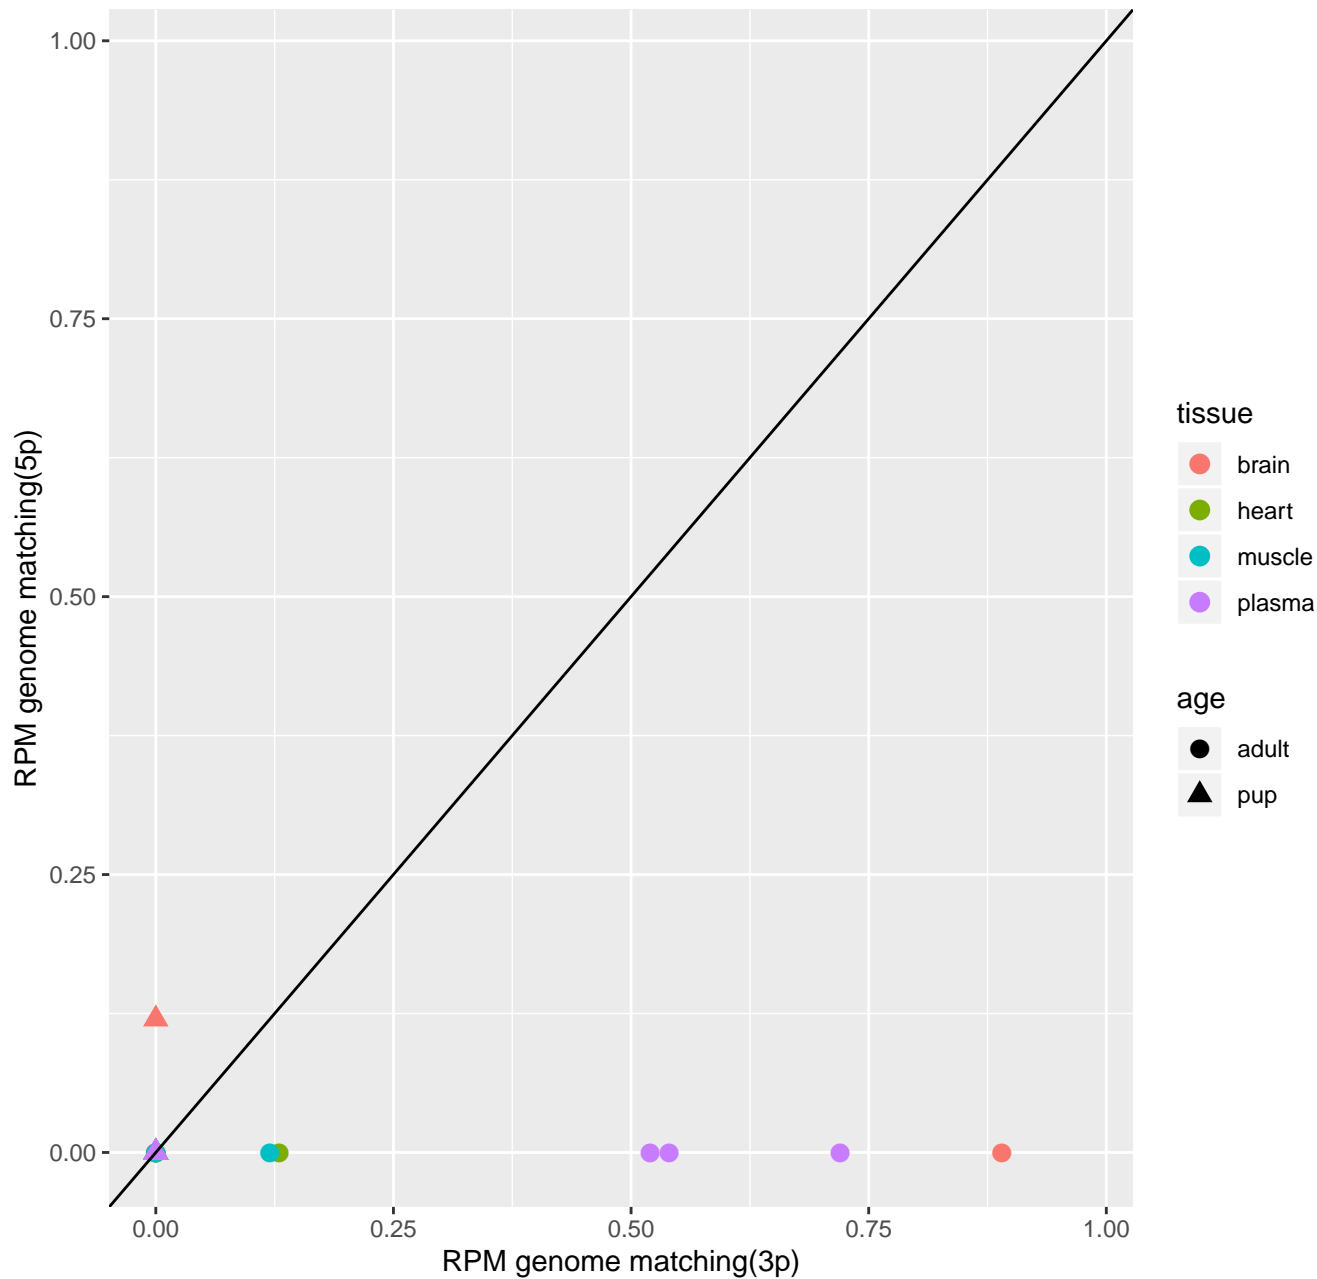

## novel\_115

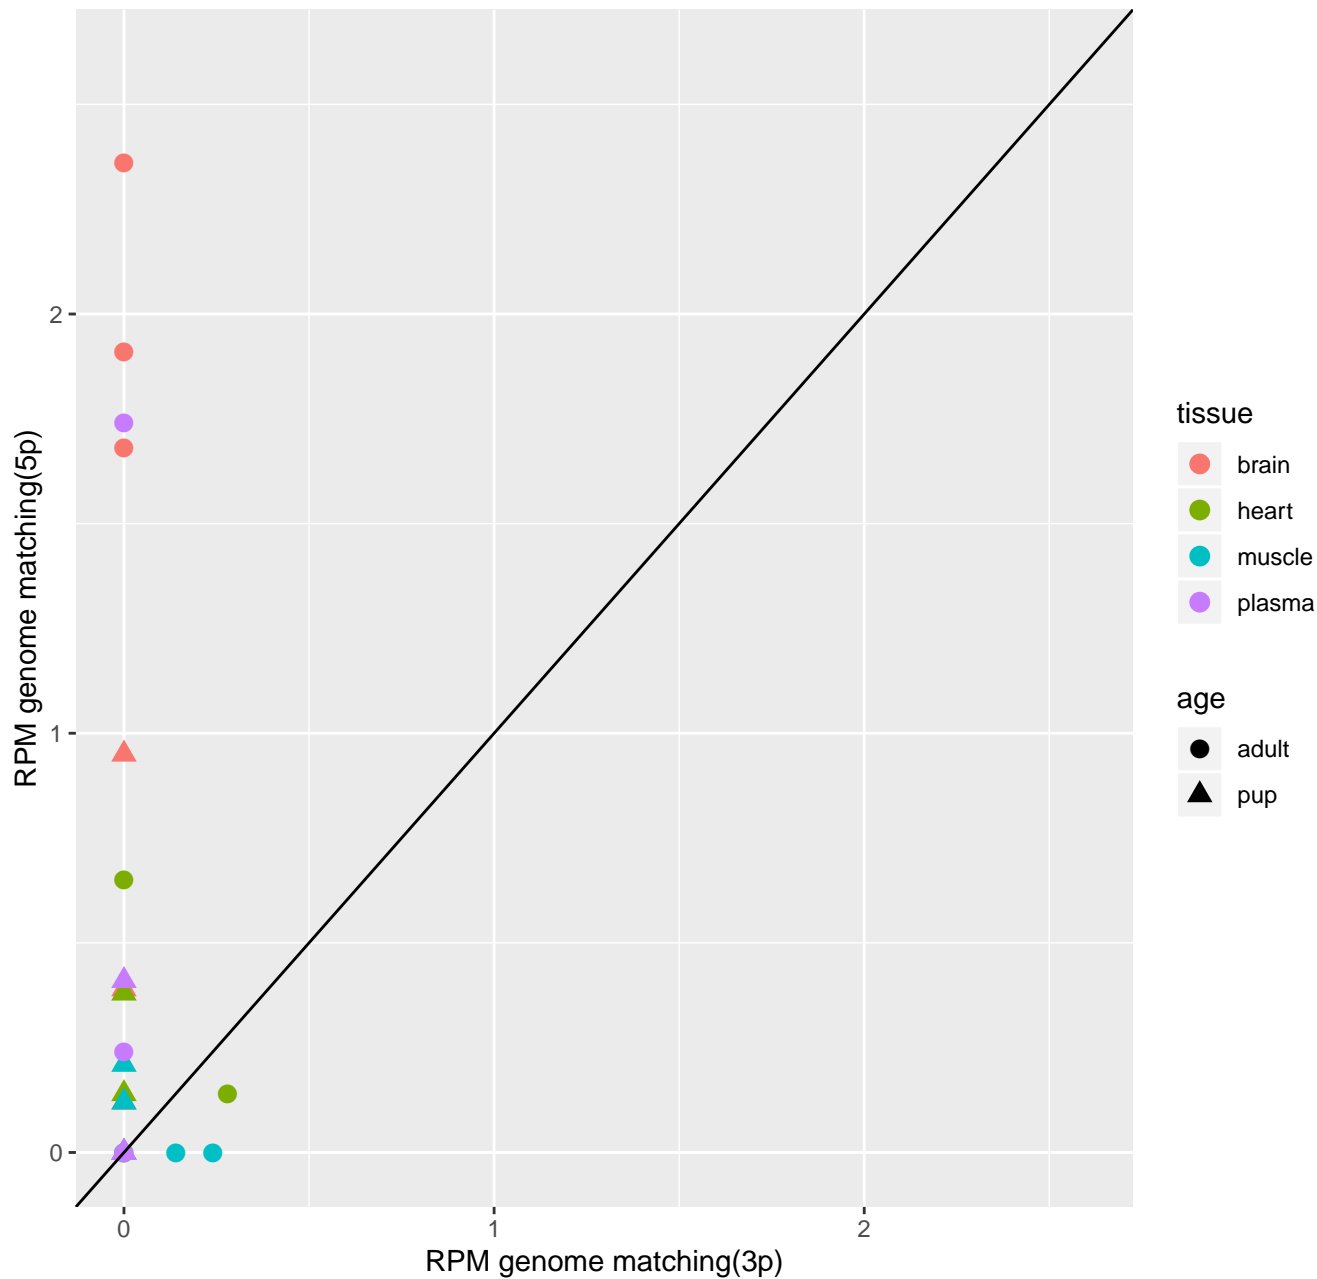

# lwe-miR-338a\_loc1

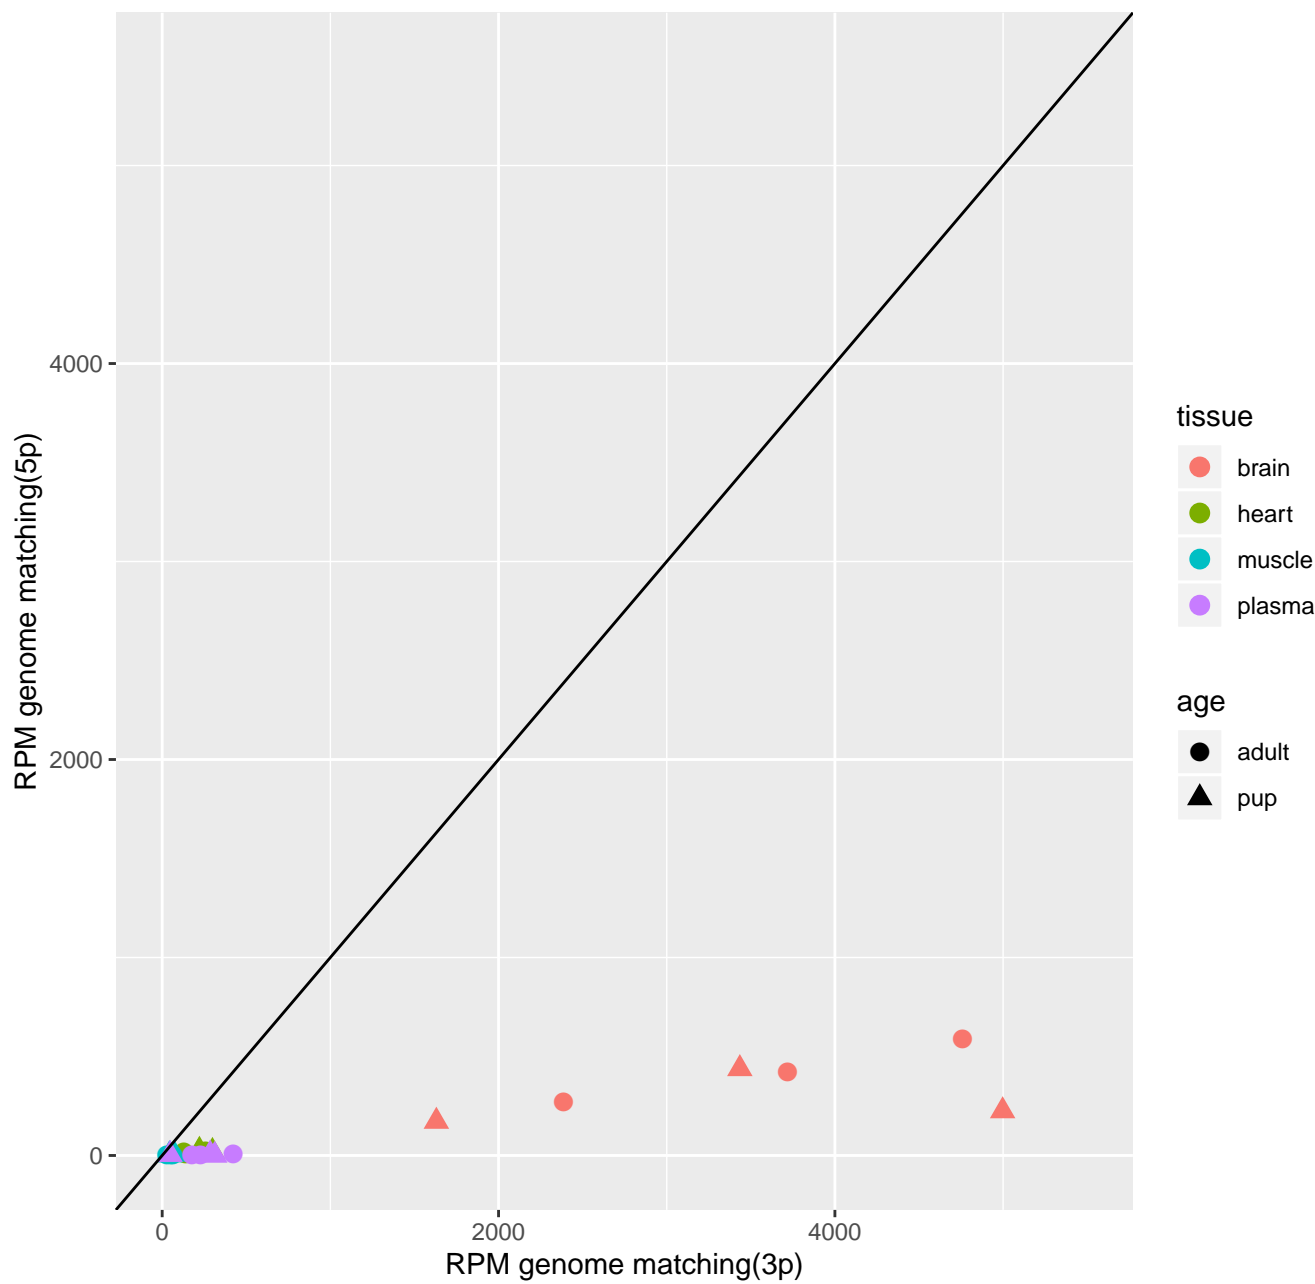

# lwe-miR-802\_loc1

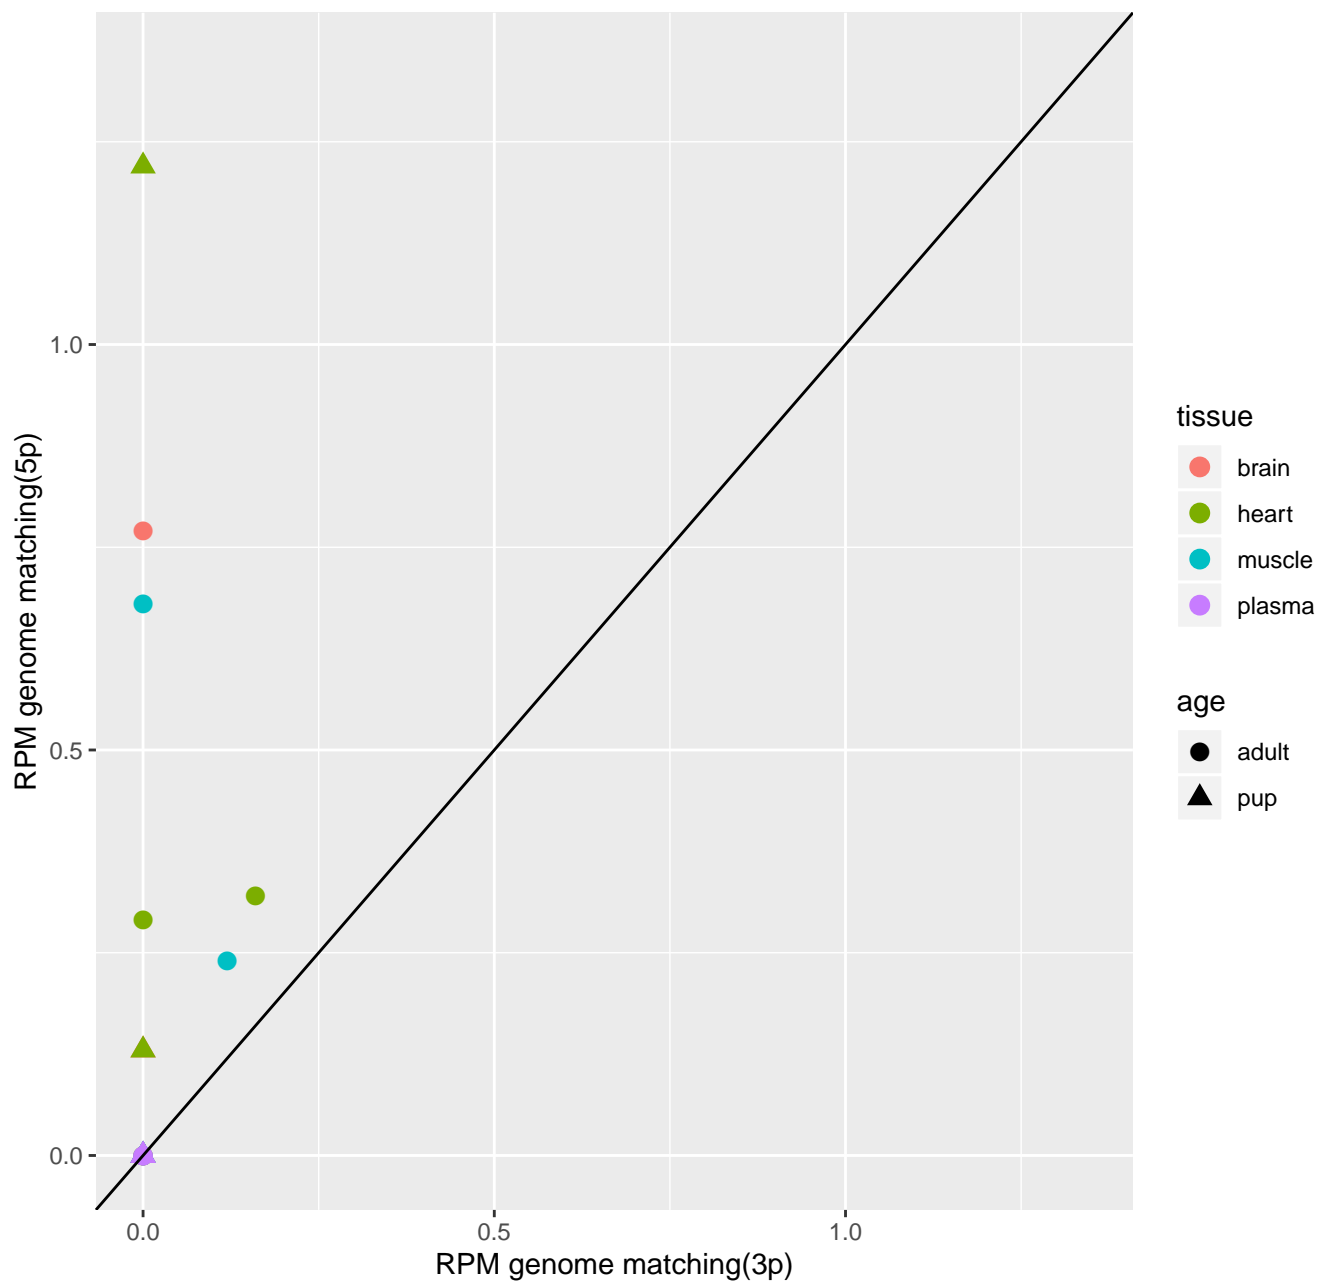



## lwe-miR-129a\_loc2

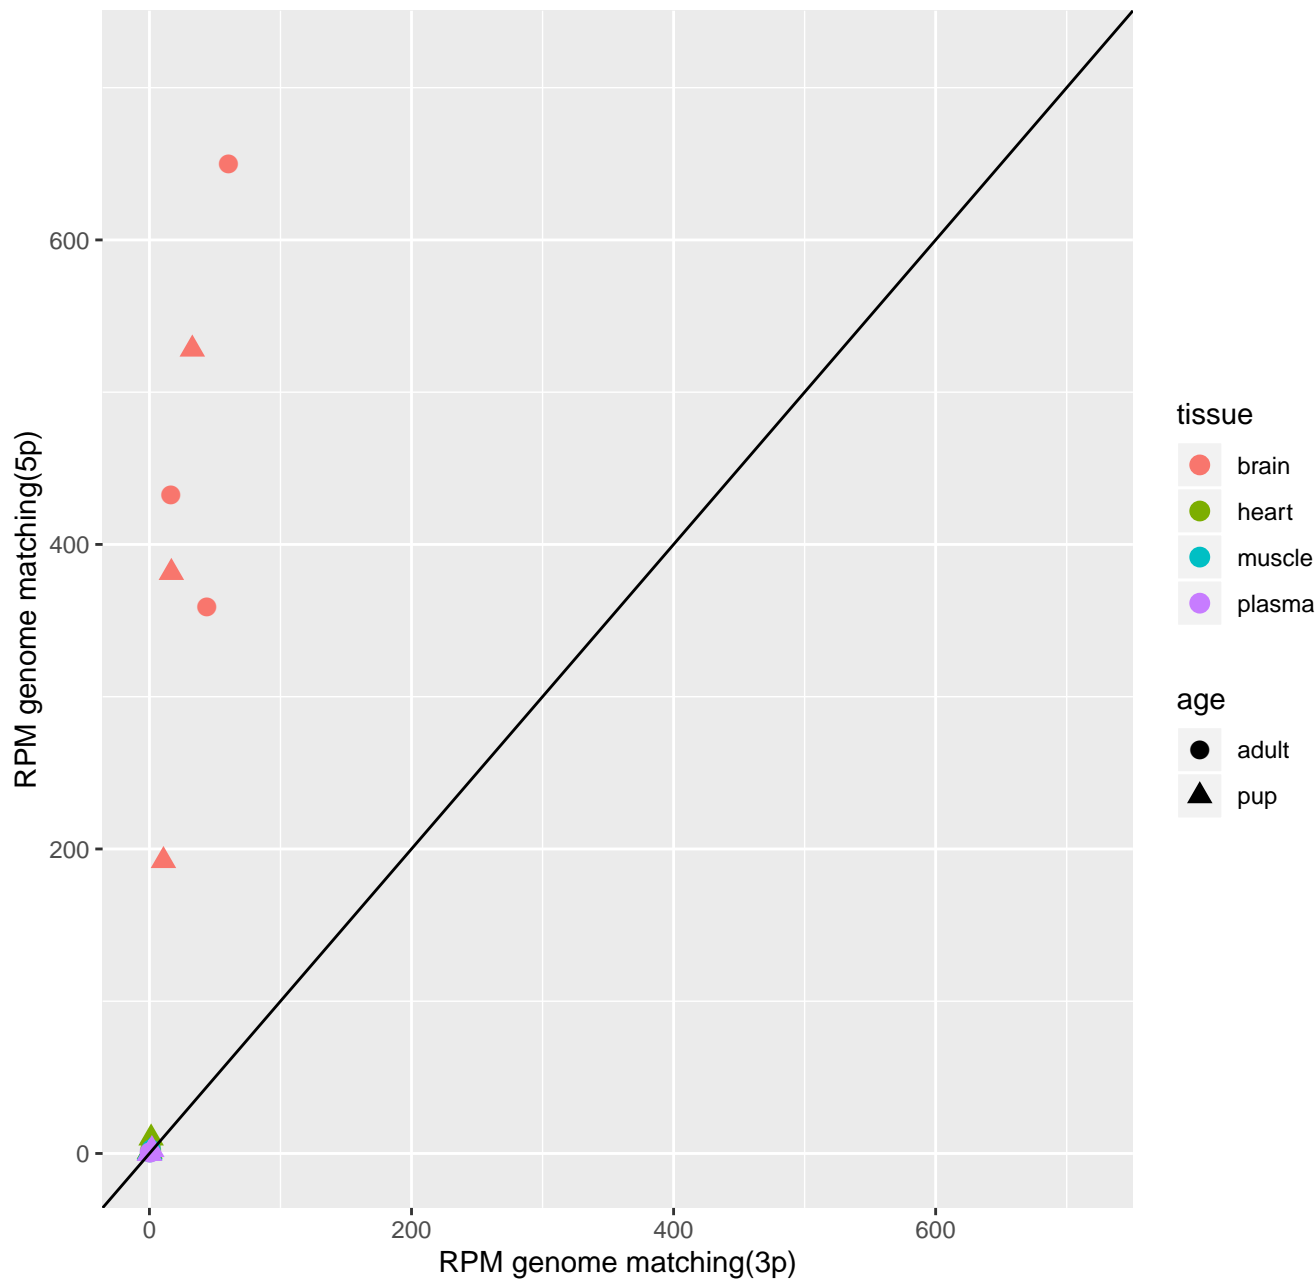

## lwe-miR-1271\_loc1

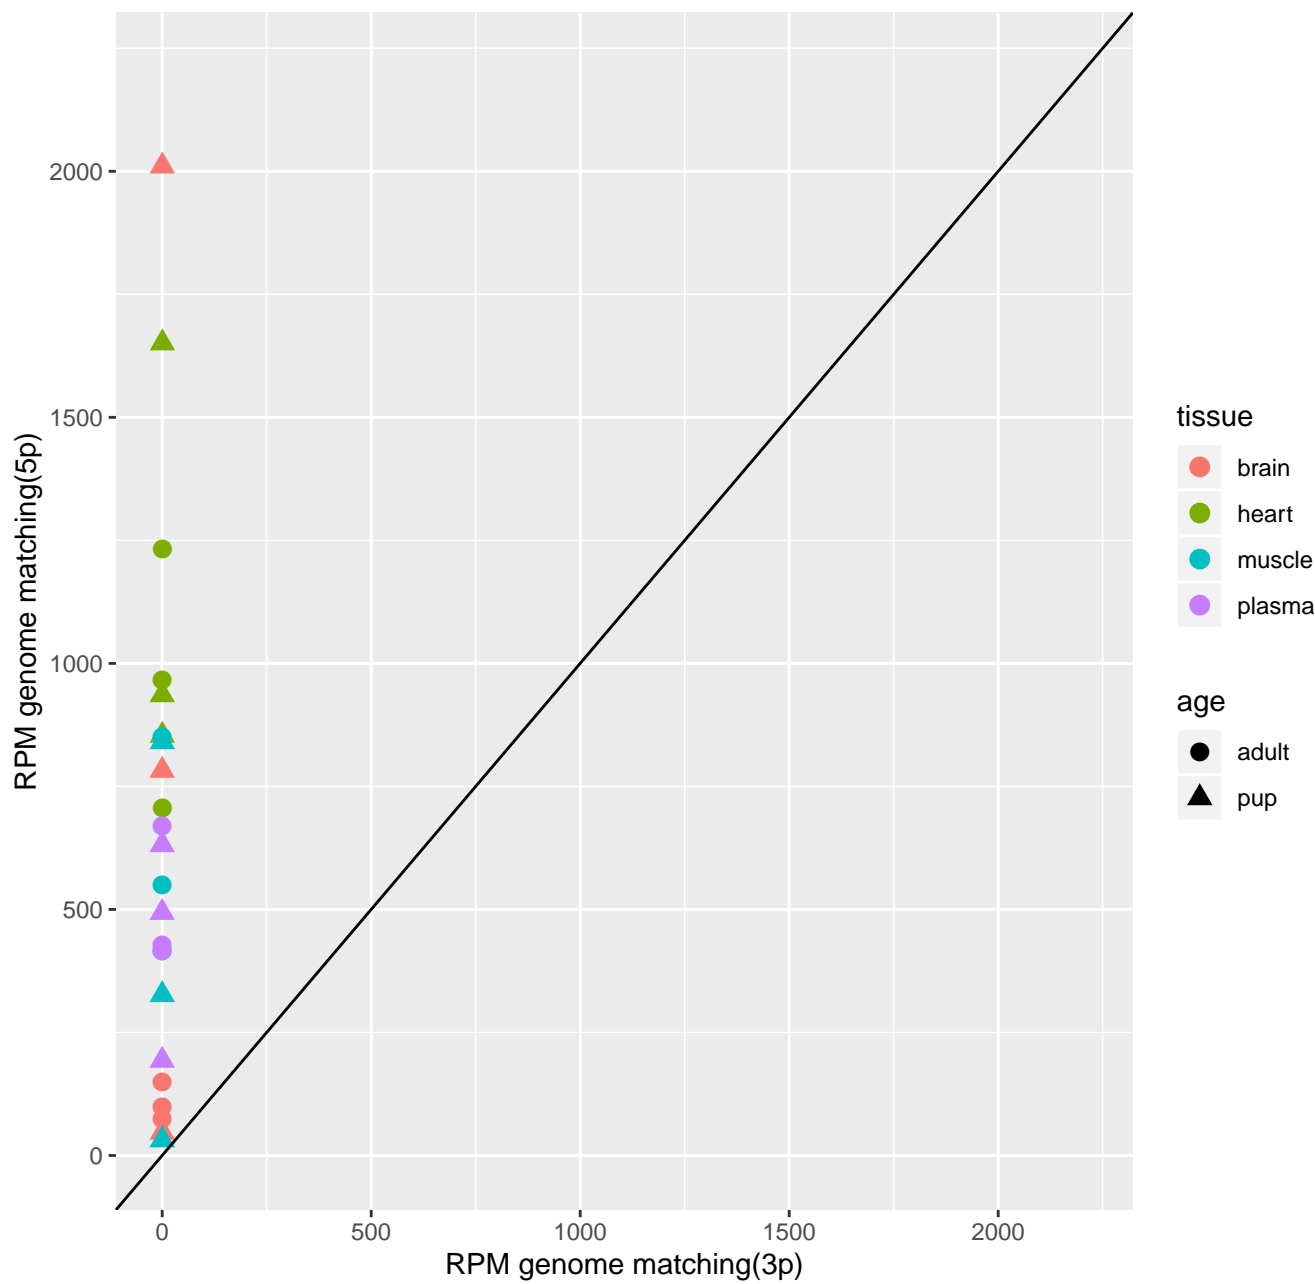

## novel\_116

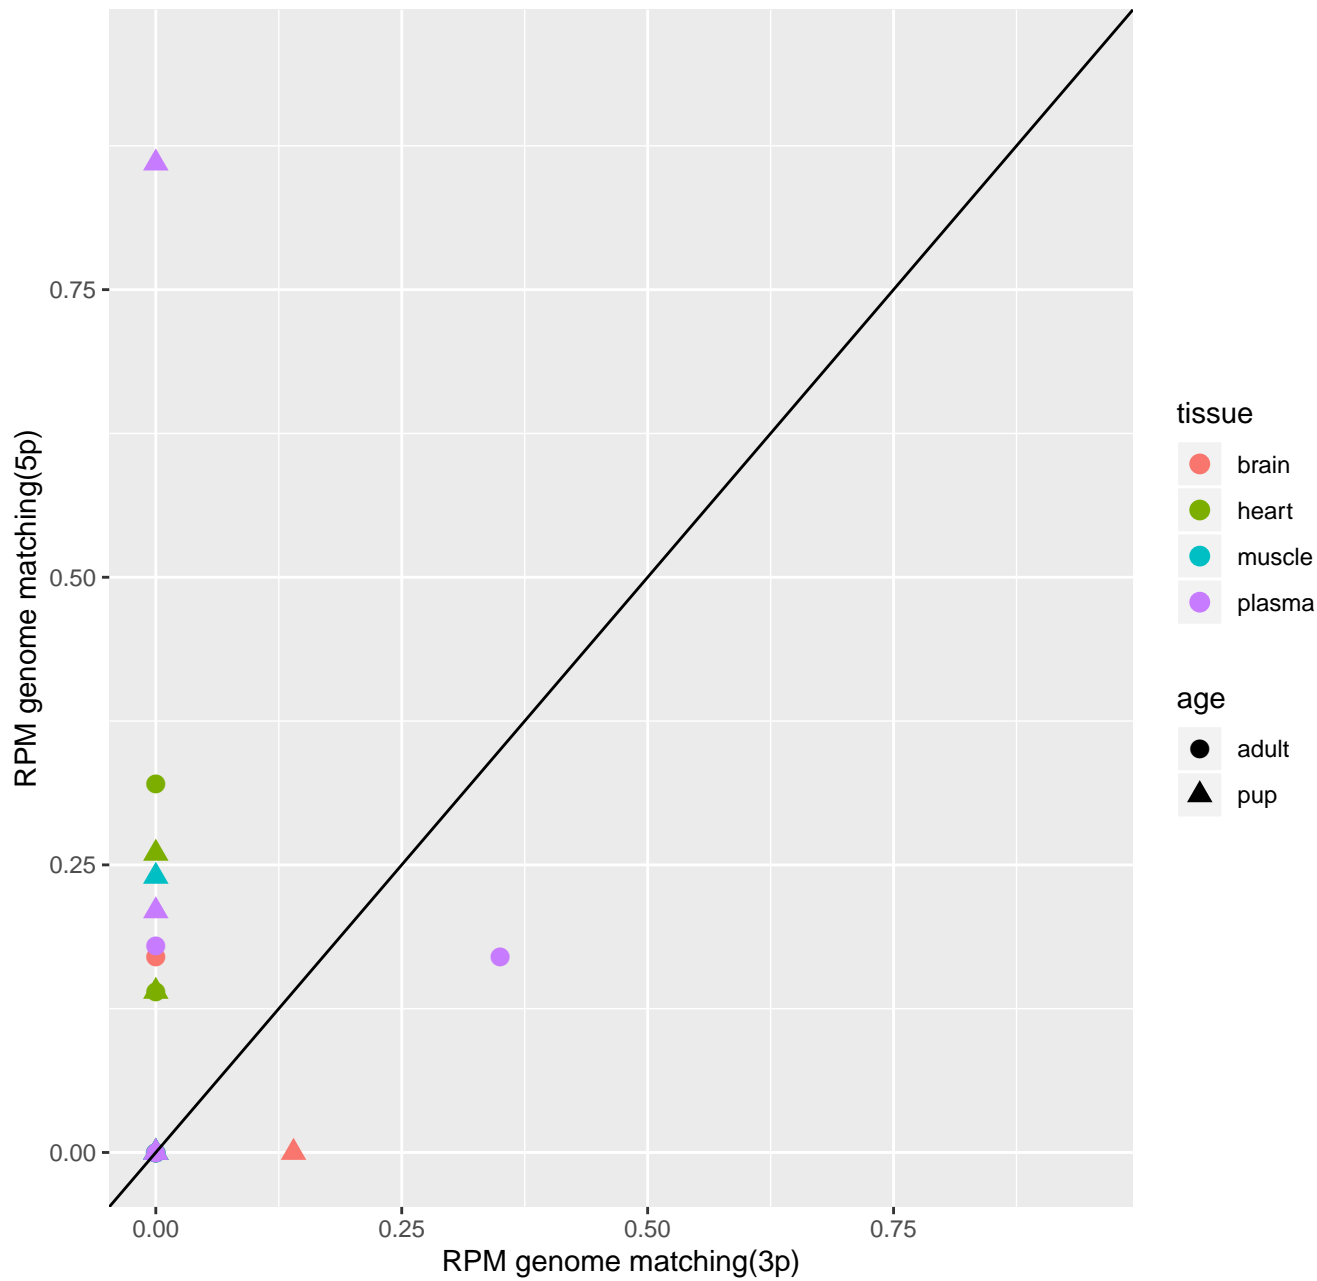

novel\_117

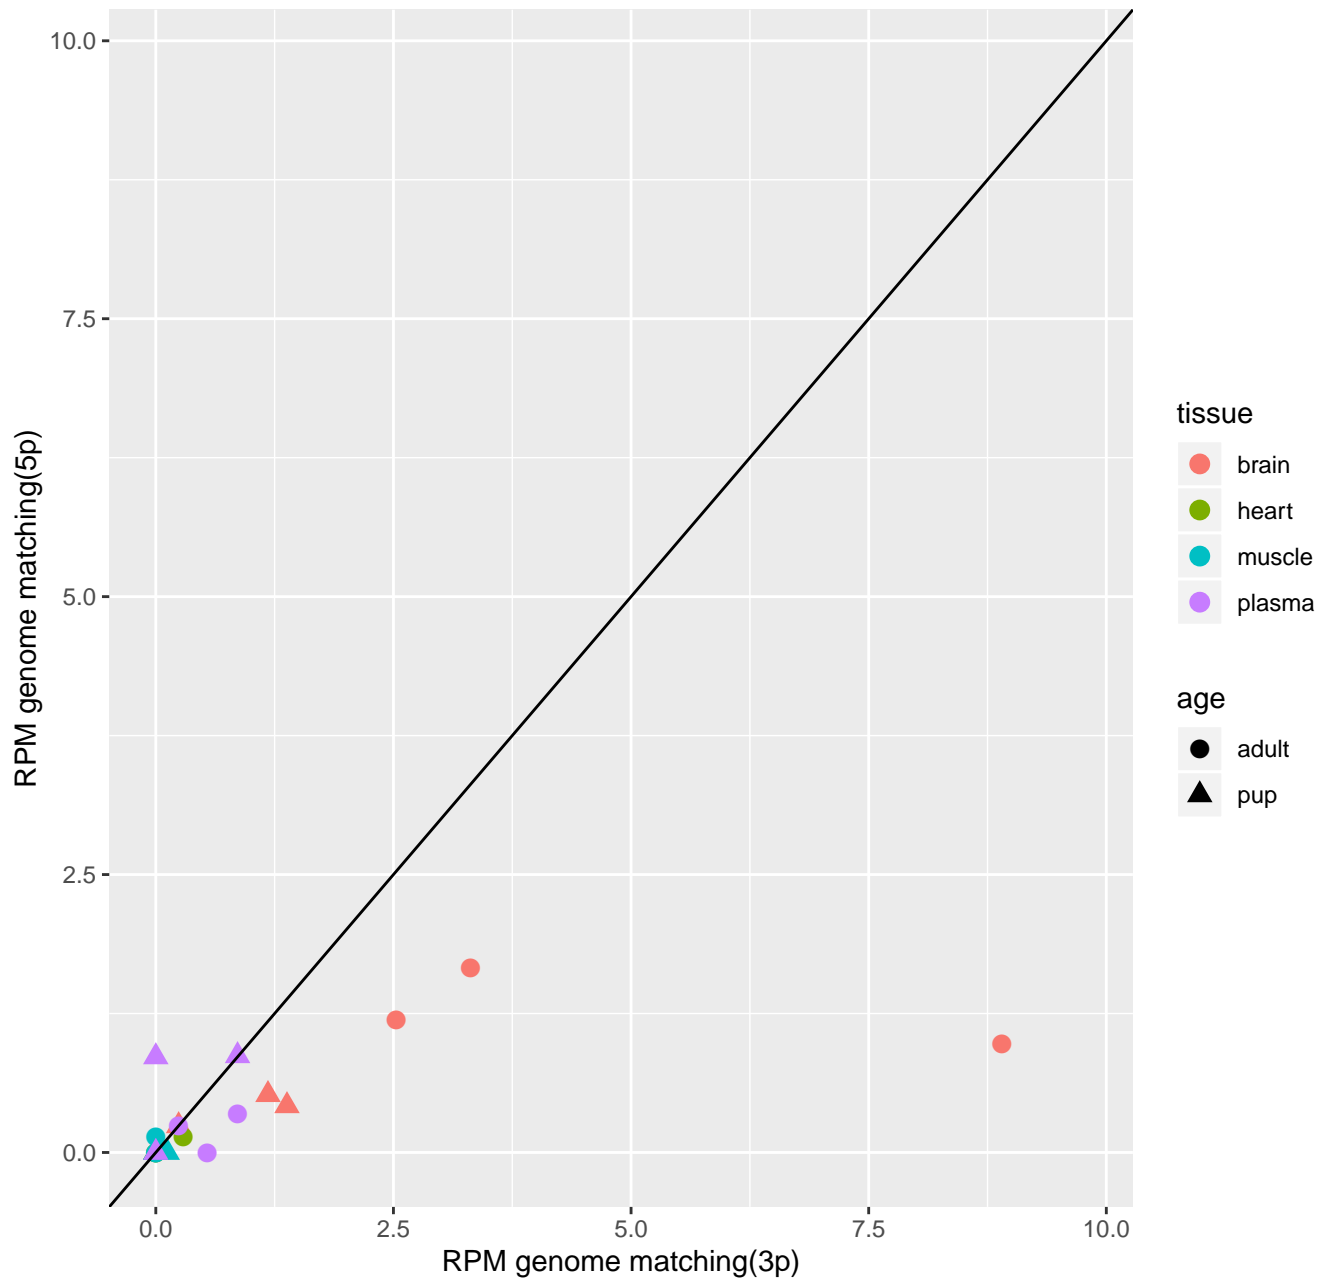

## lwe-miR-25\_loc1

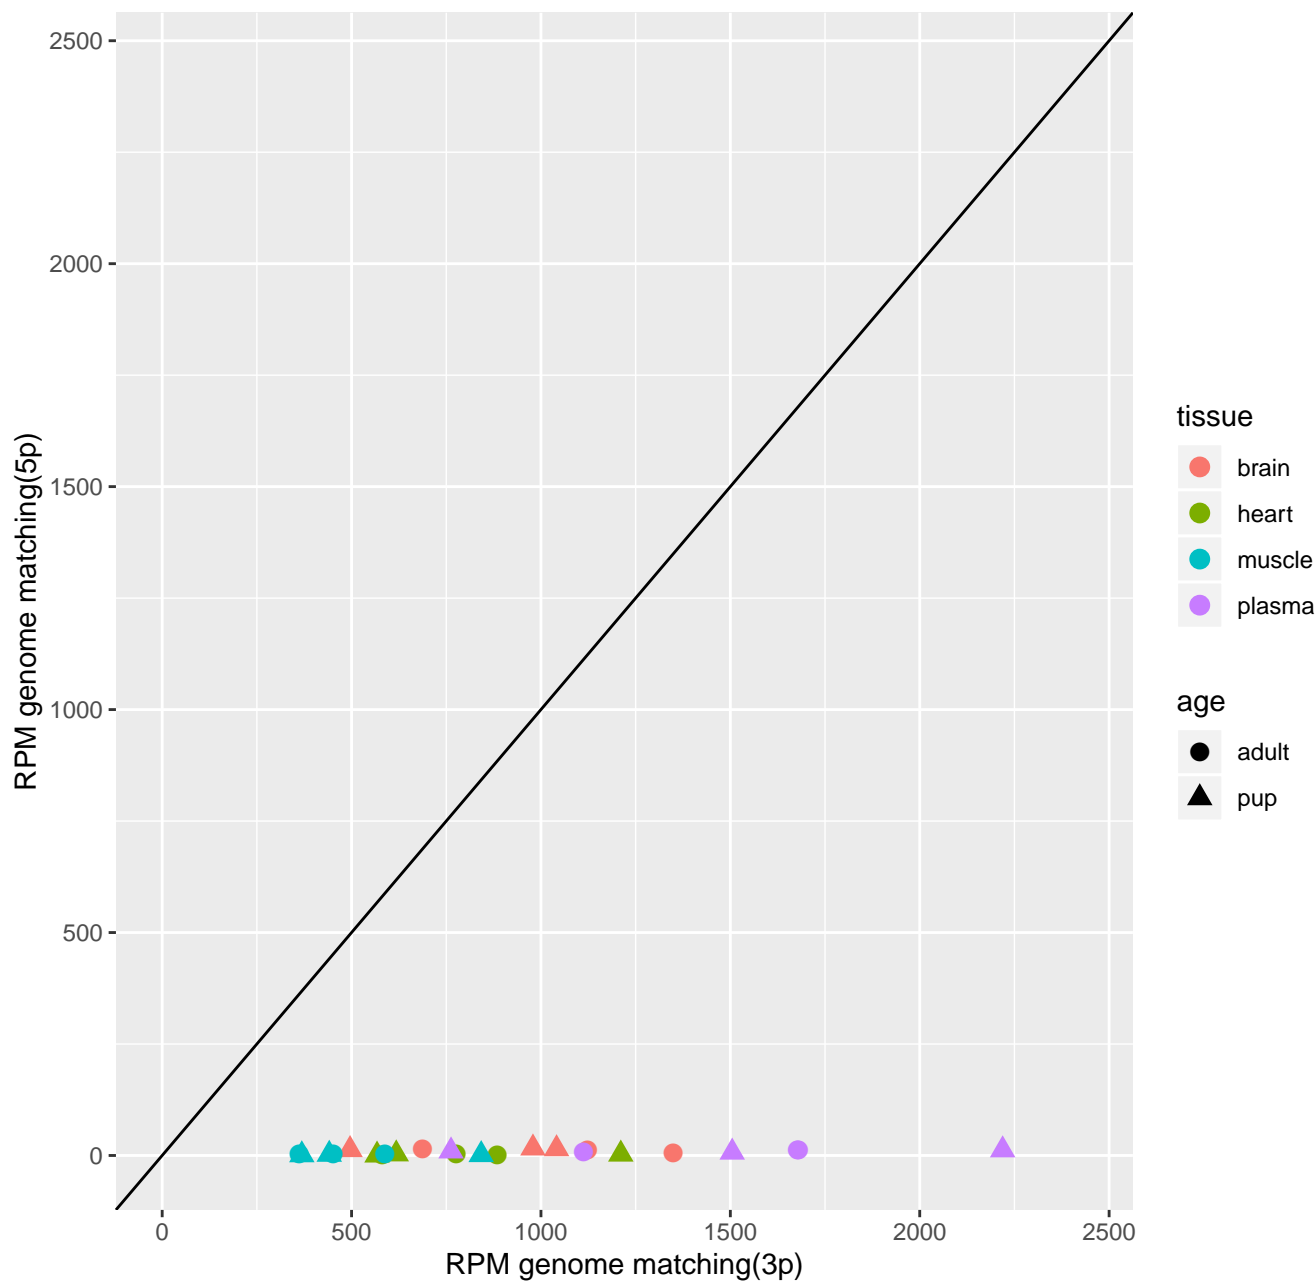

## lwe-miR-93\_loc1

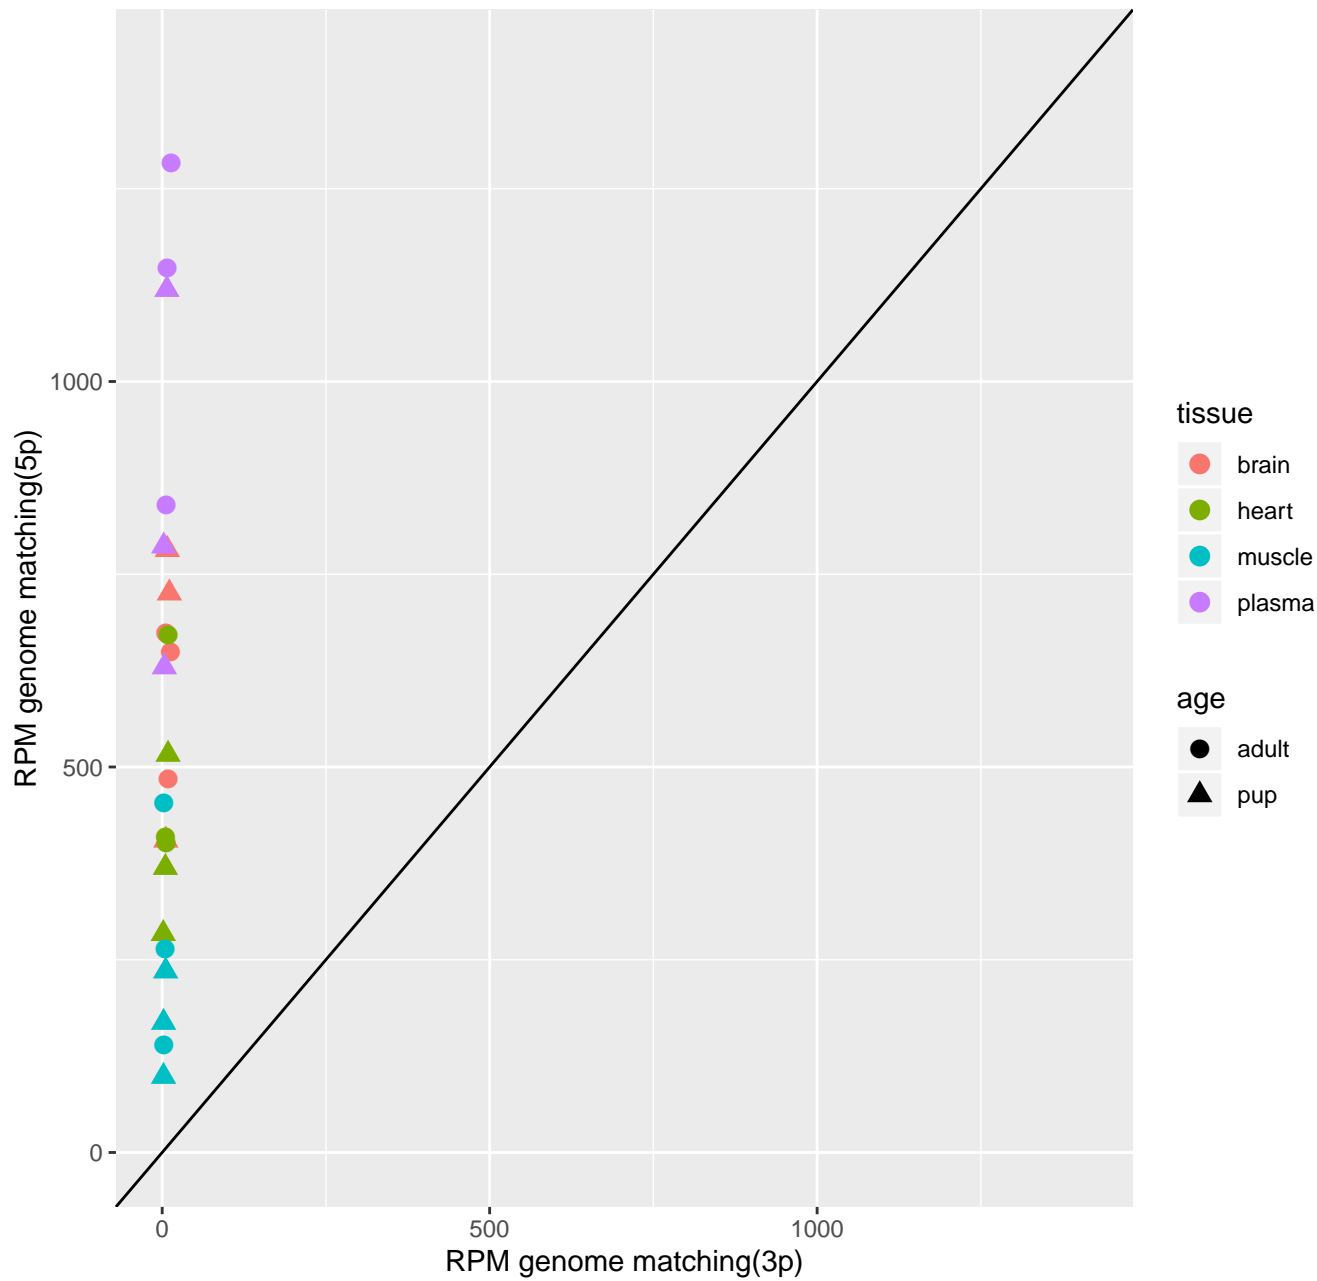

## lwe-miR-106\_loc2

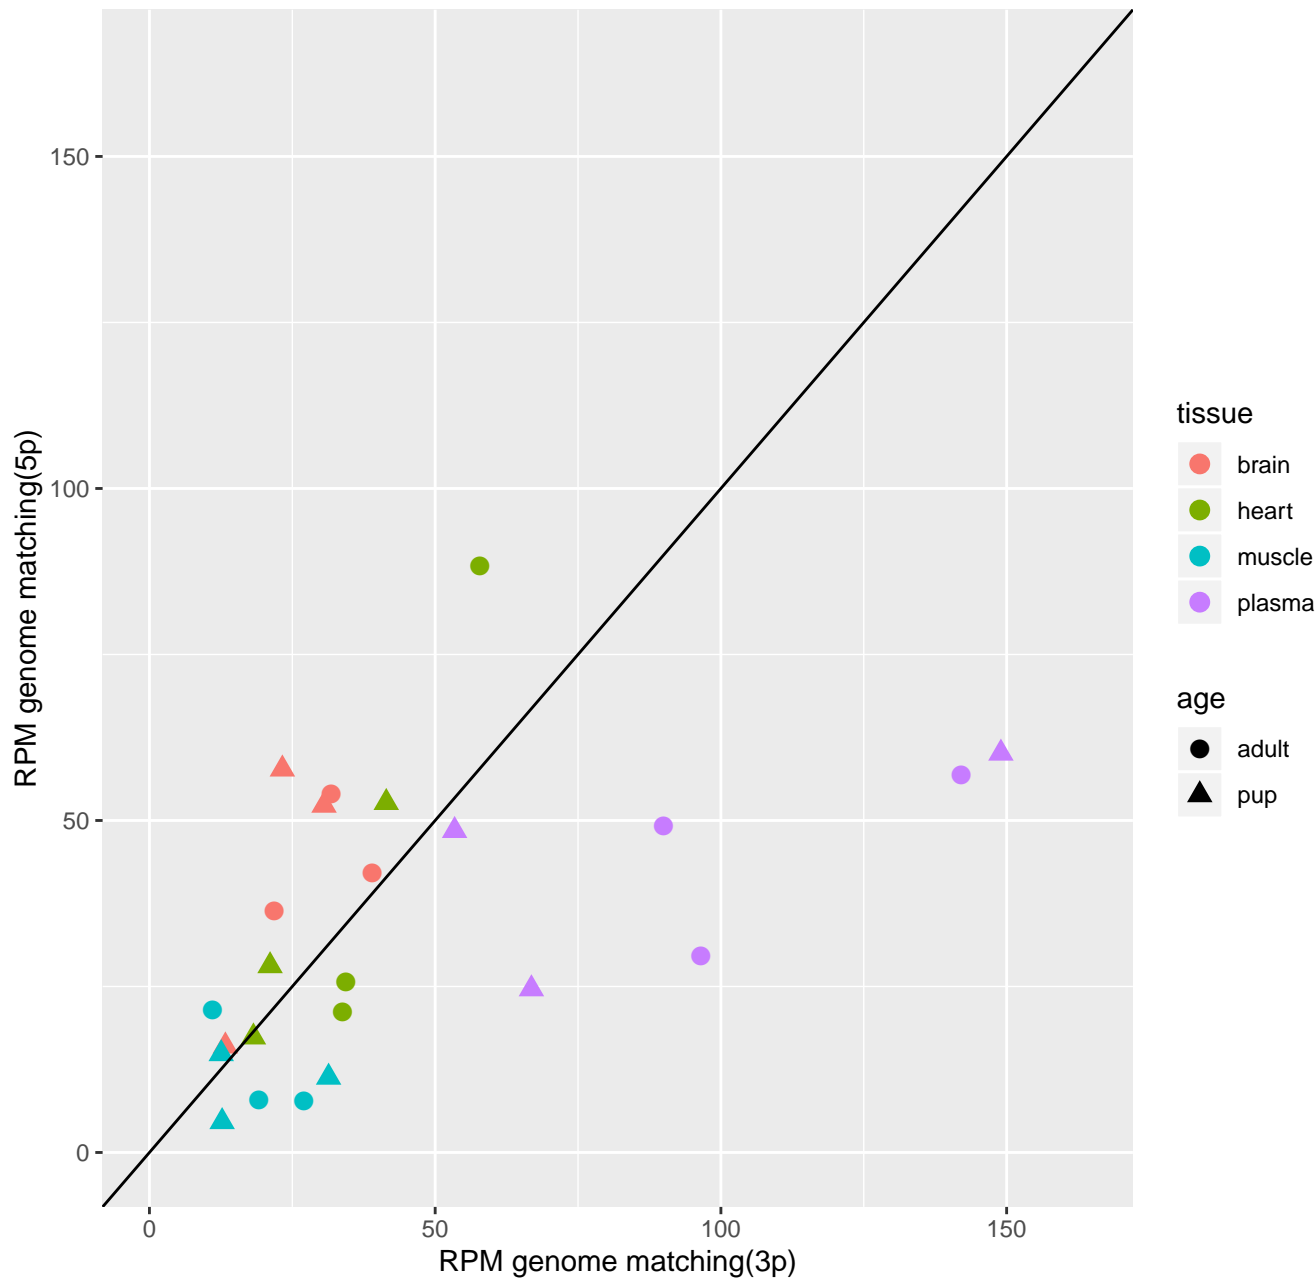

# novel\_118

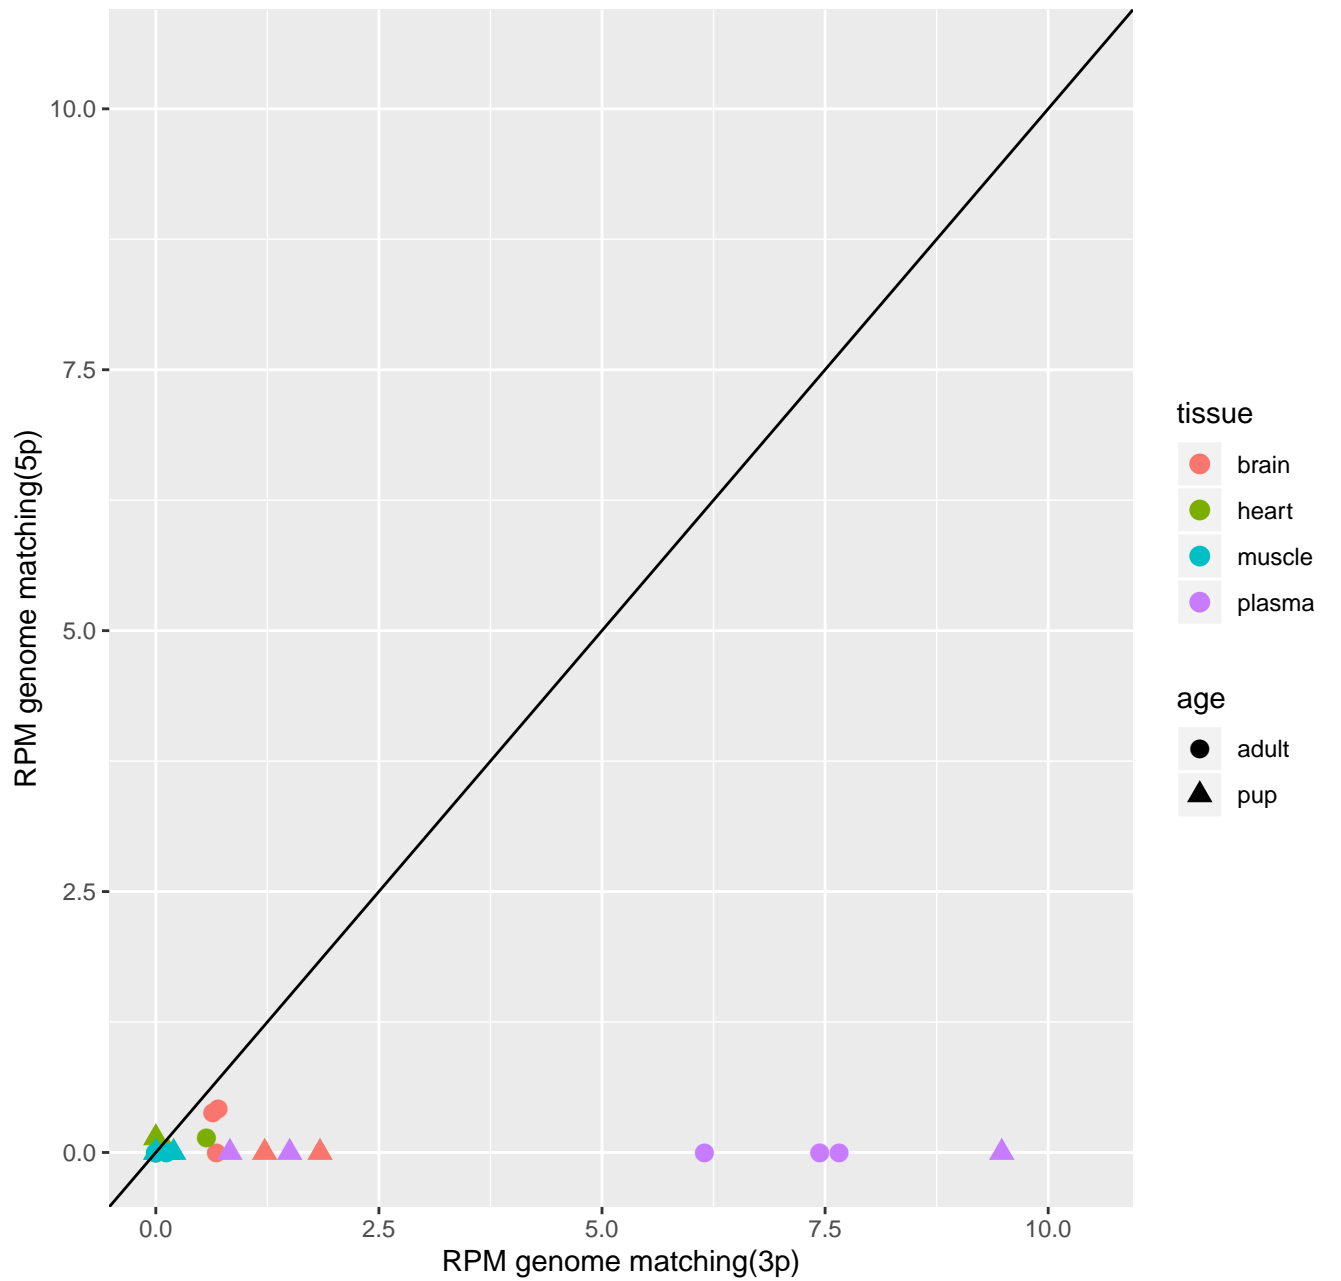



## lwe-miR-185\_loc1

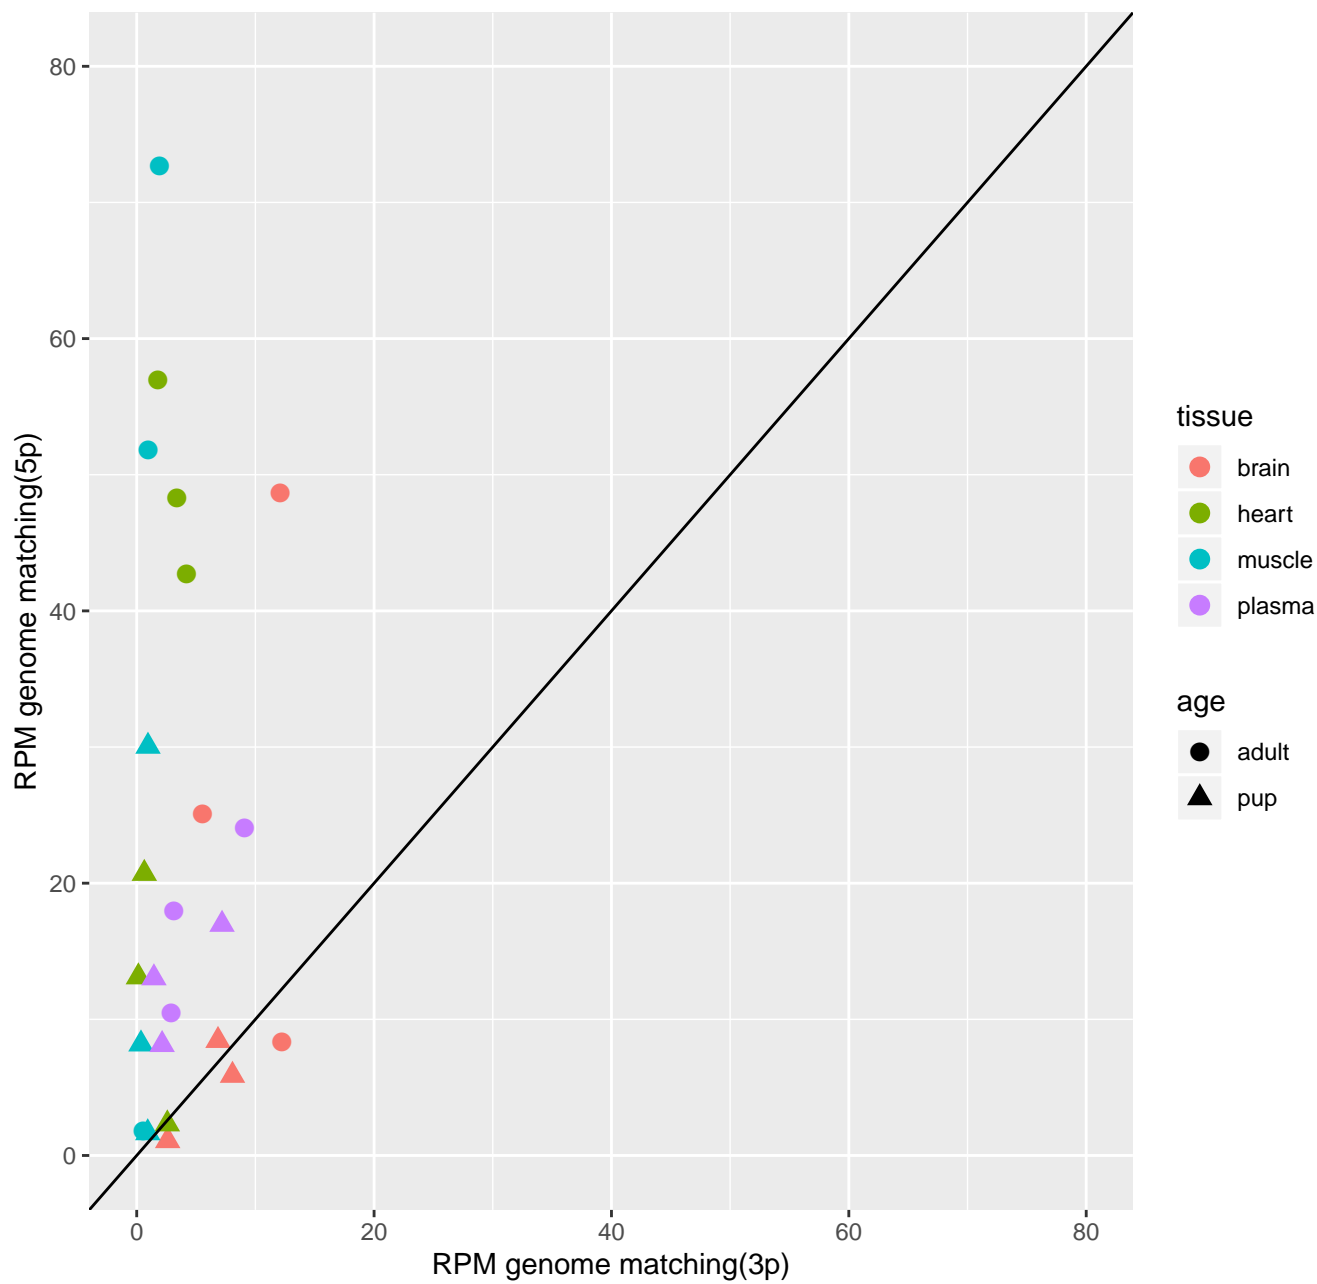

## lwe-miR-1306\_loc1

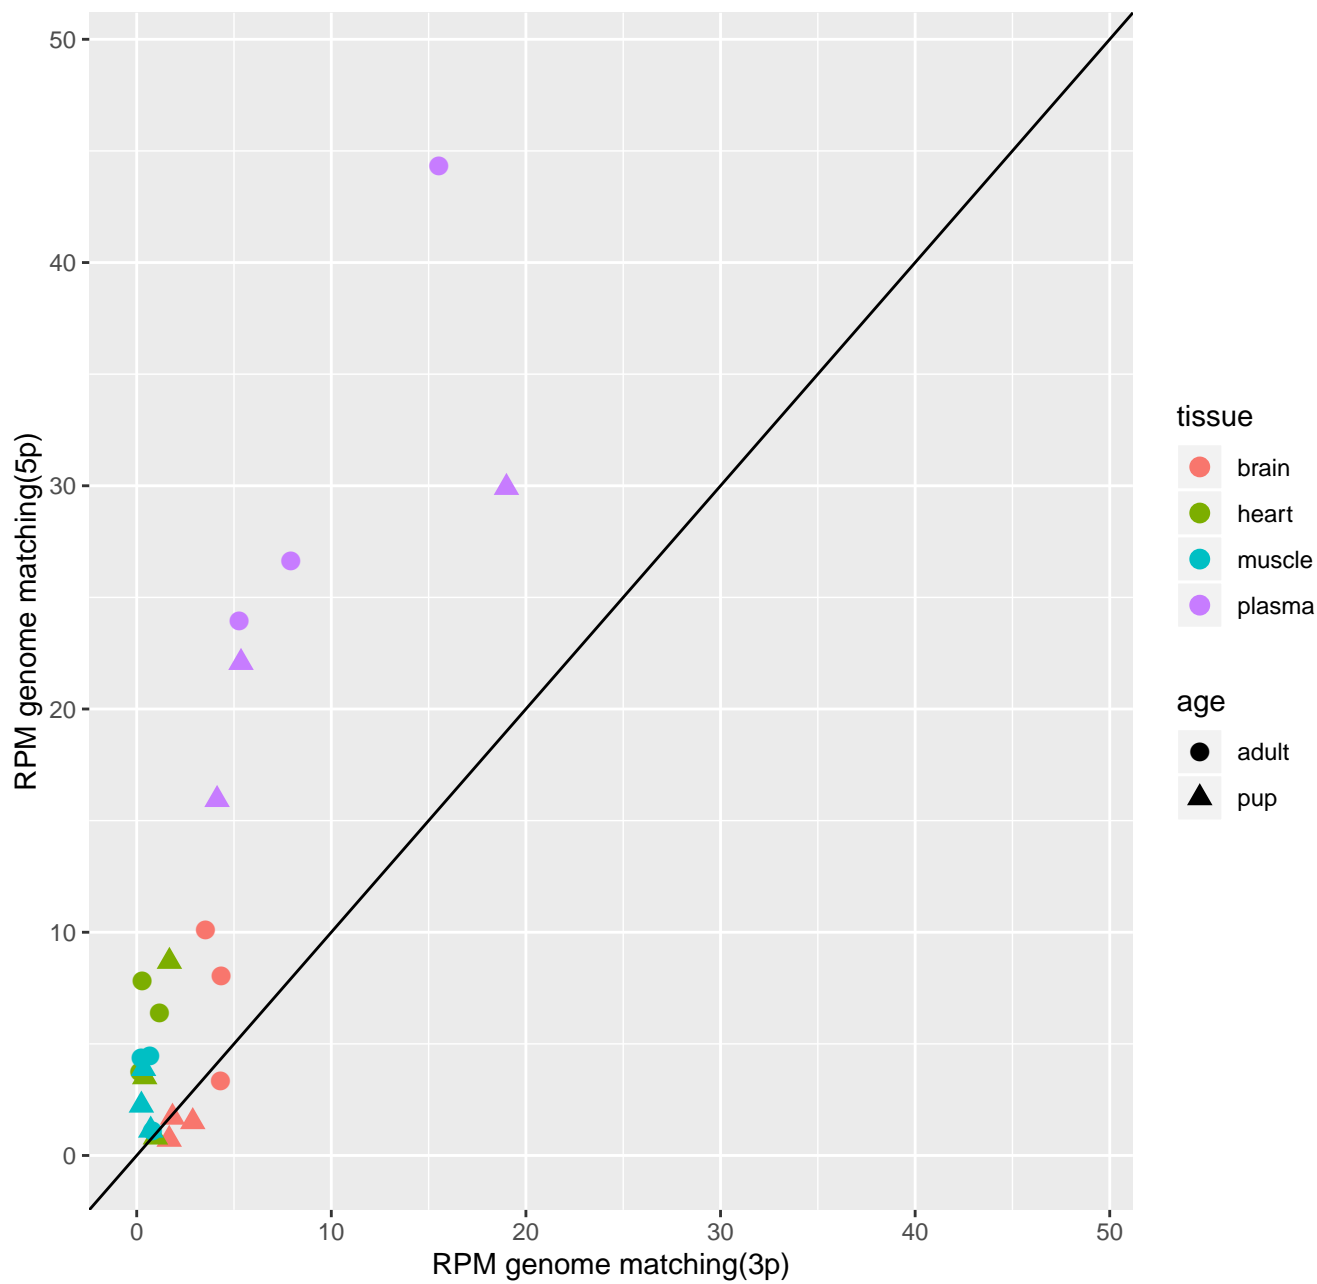

## novel\_119

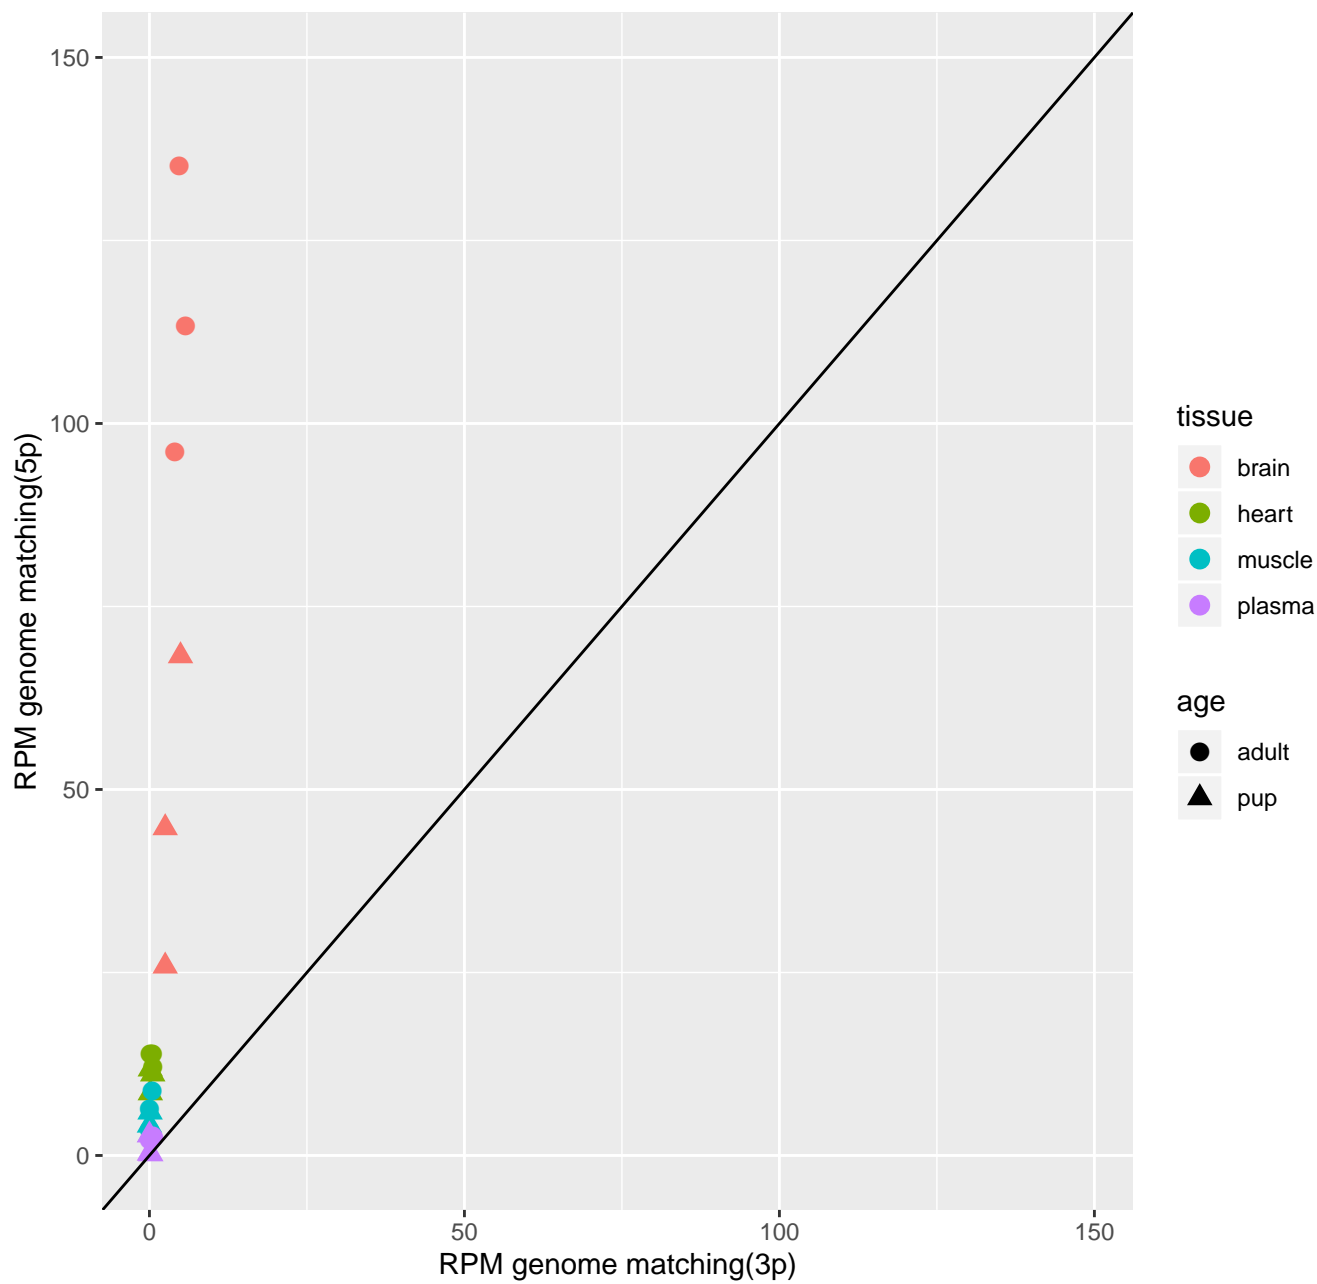

## novel\_120

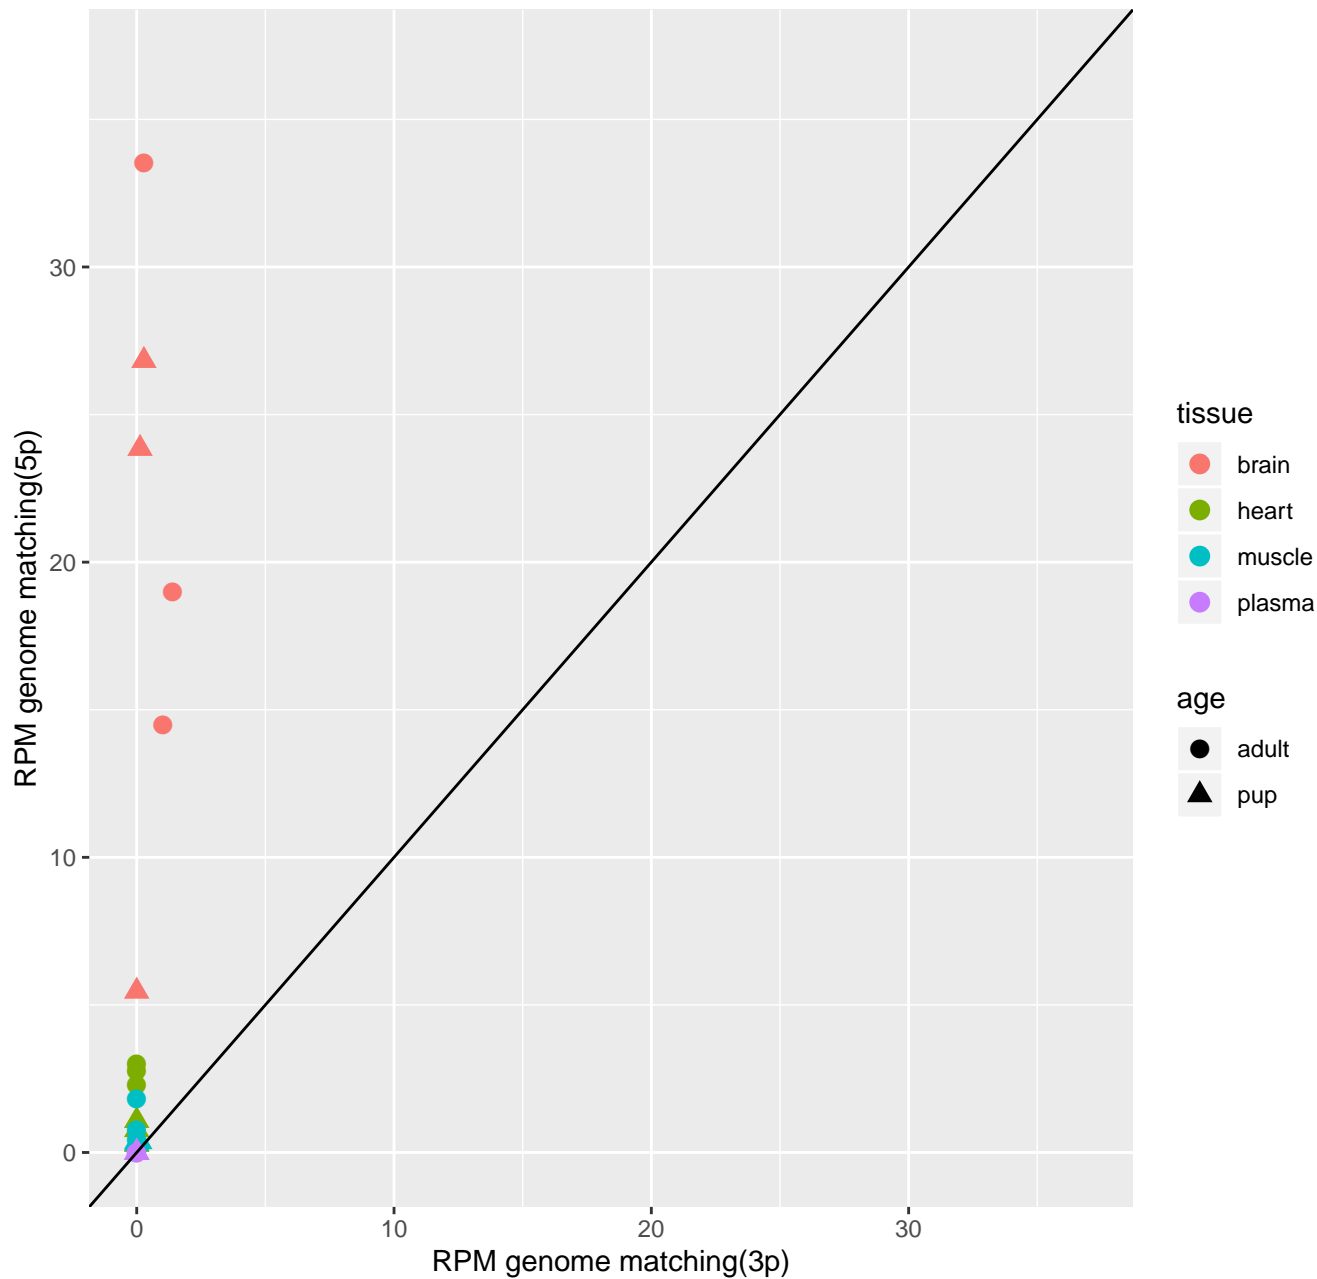

# lwe-miR-206\_loc1

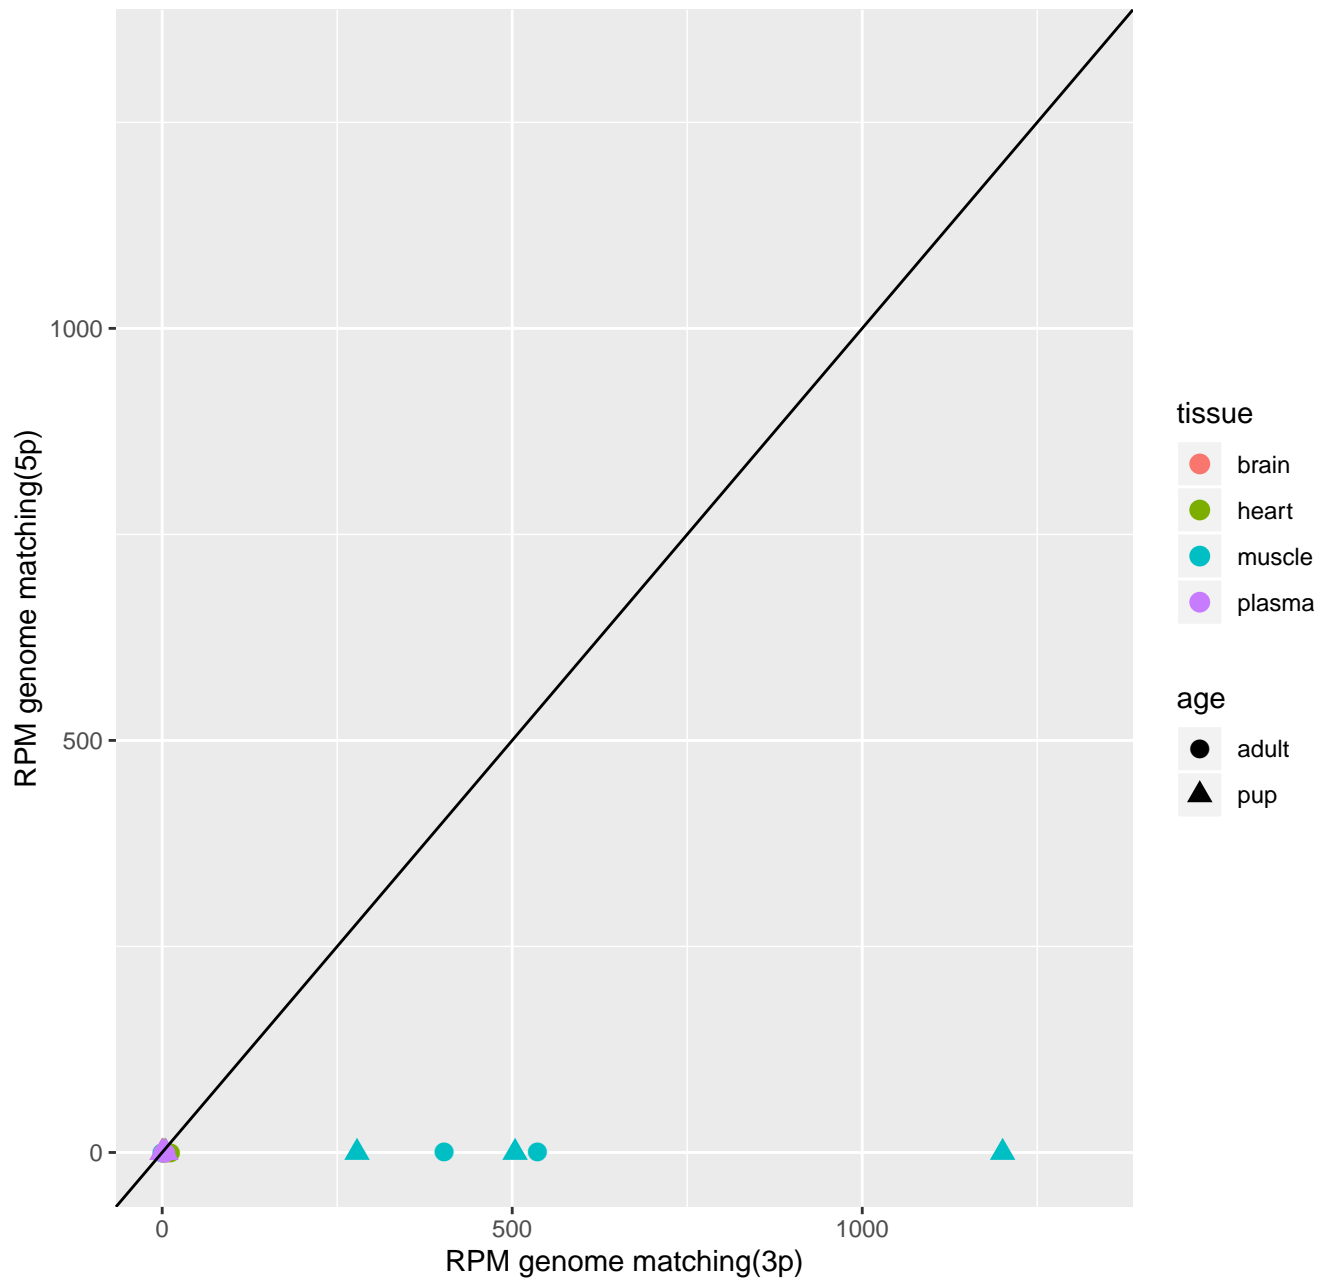

## lwe-miR-133\_loc2

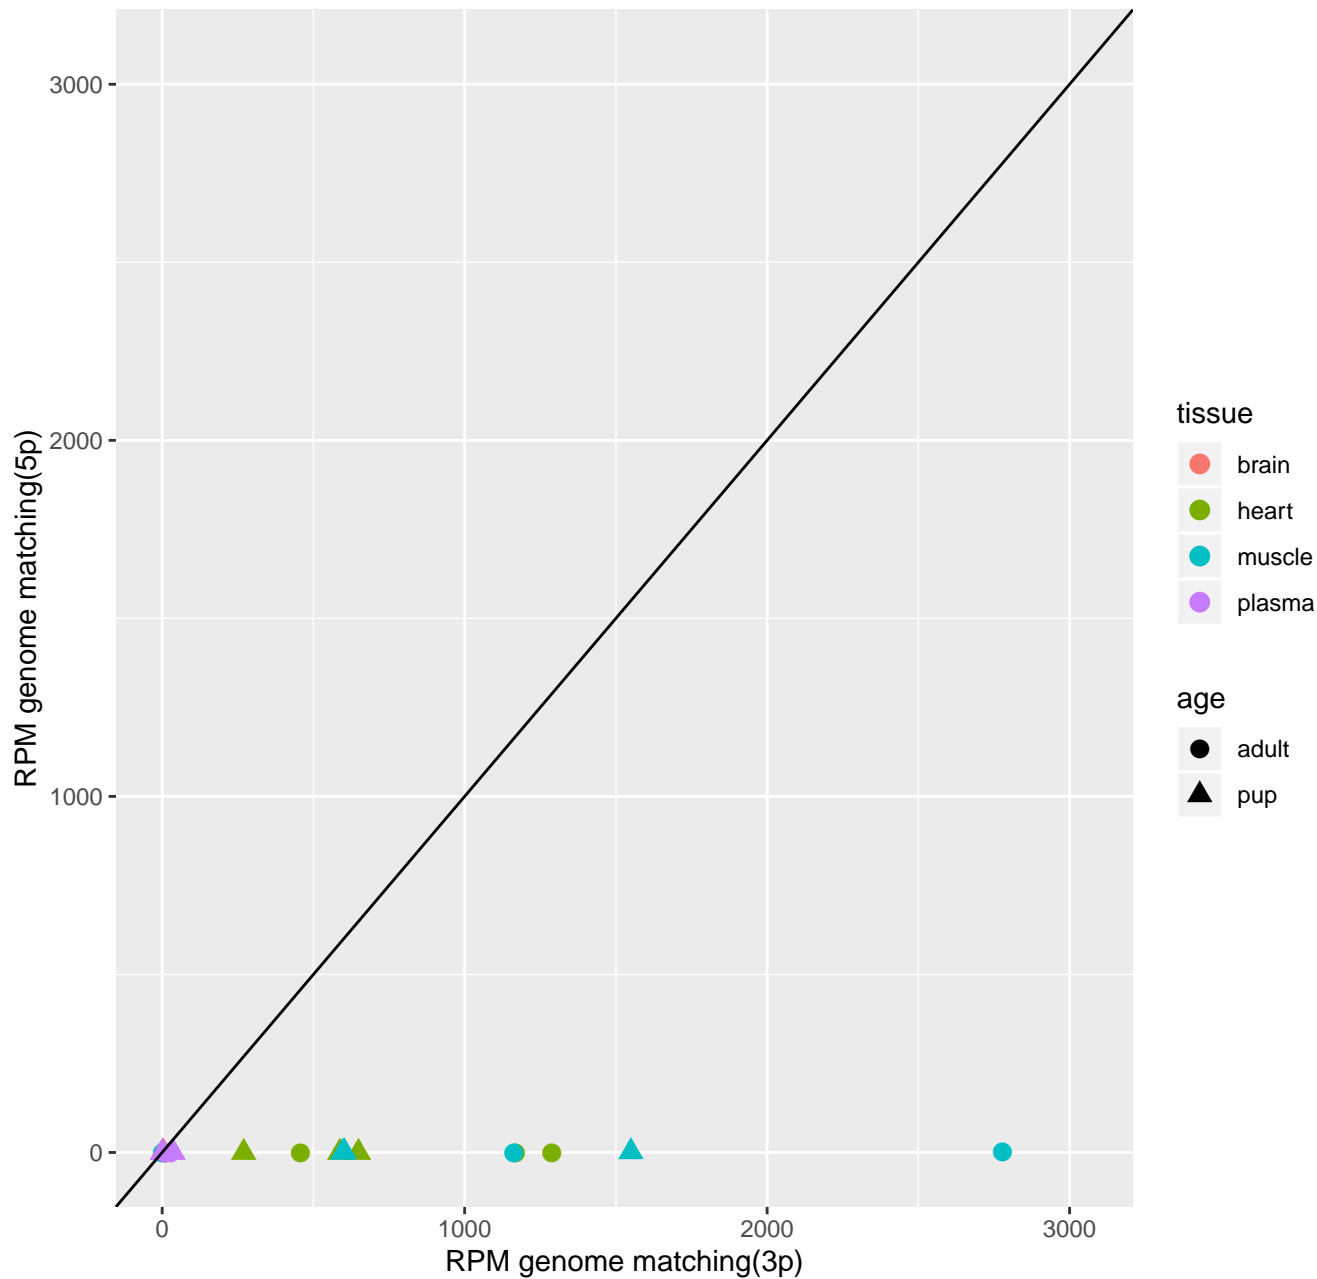

## lwe-miR-26b\_loc1

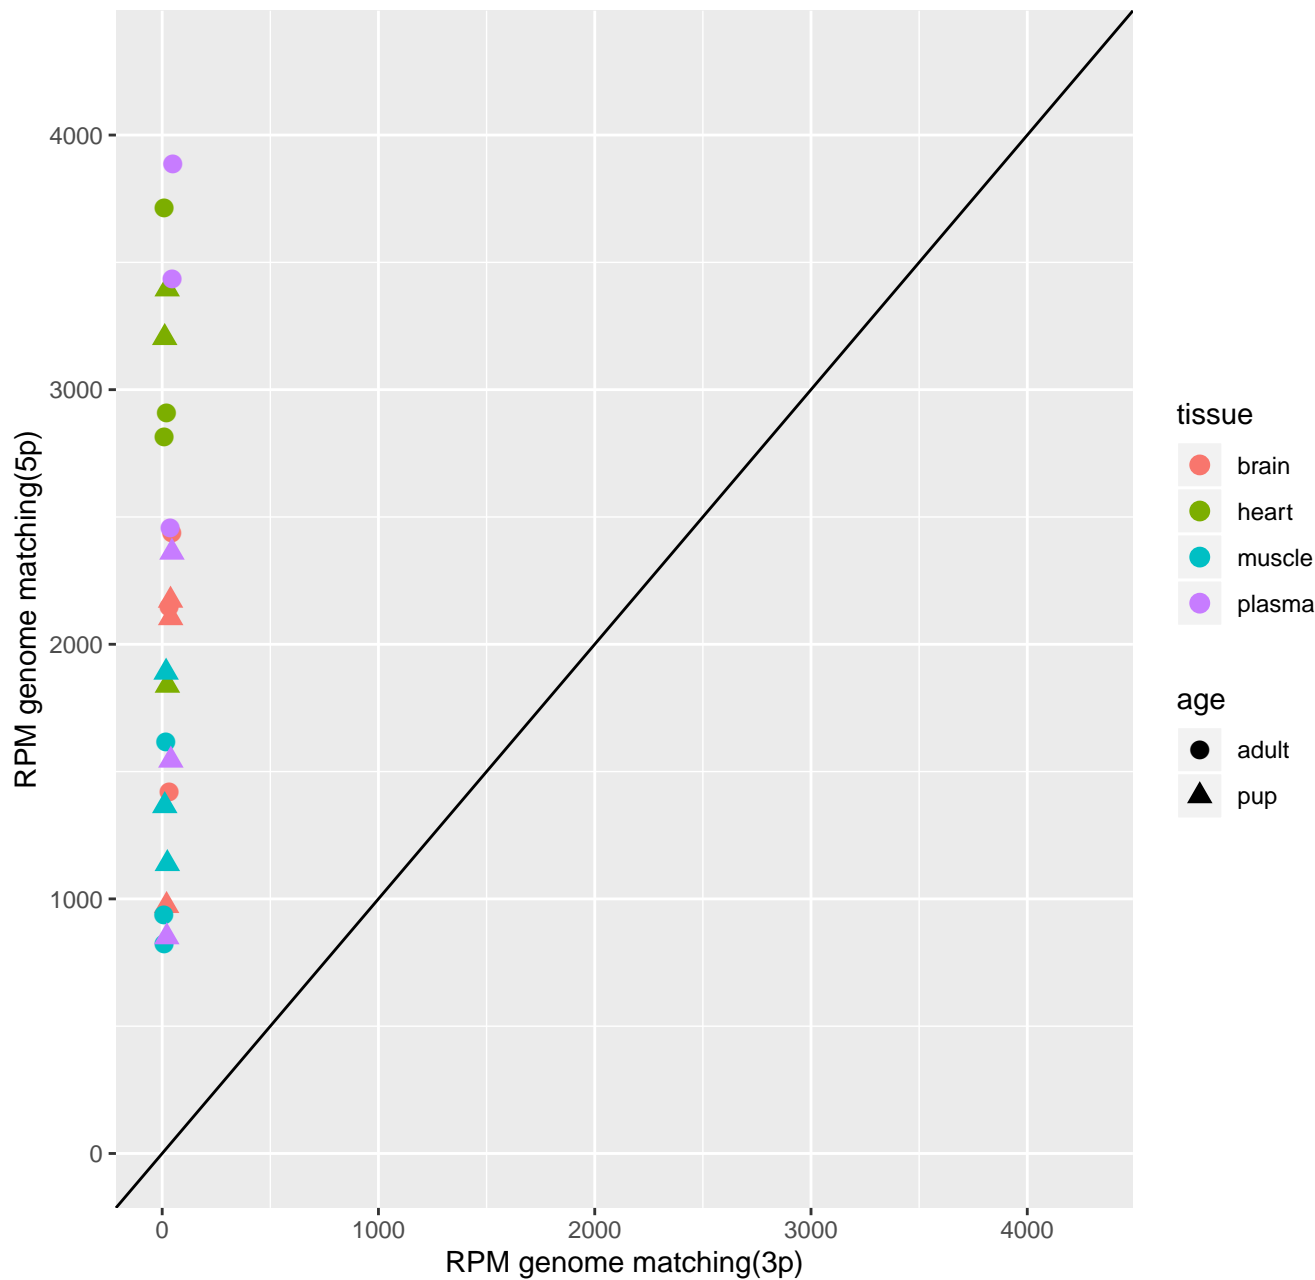

## lwe-miR-340\_loc1

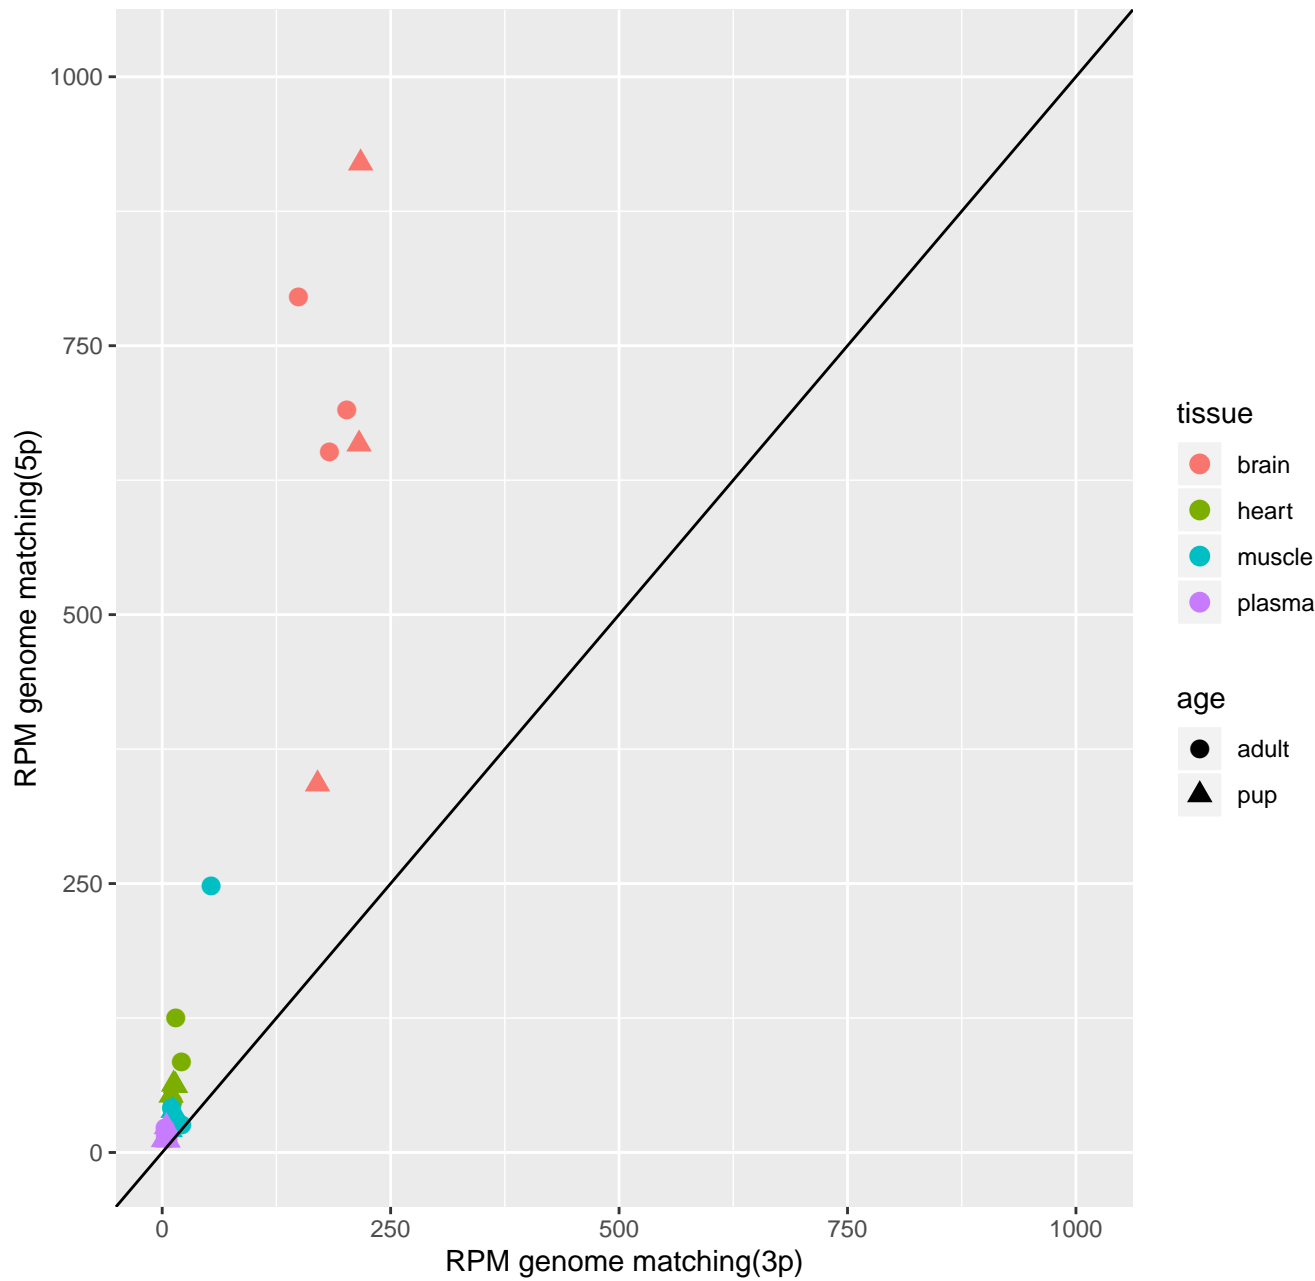



## lwe-miR-142\_loc1

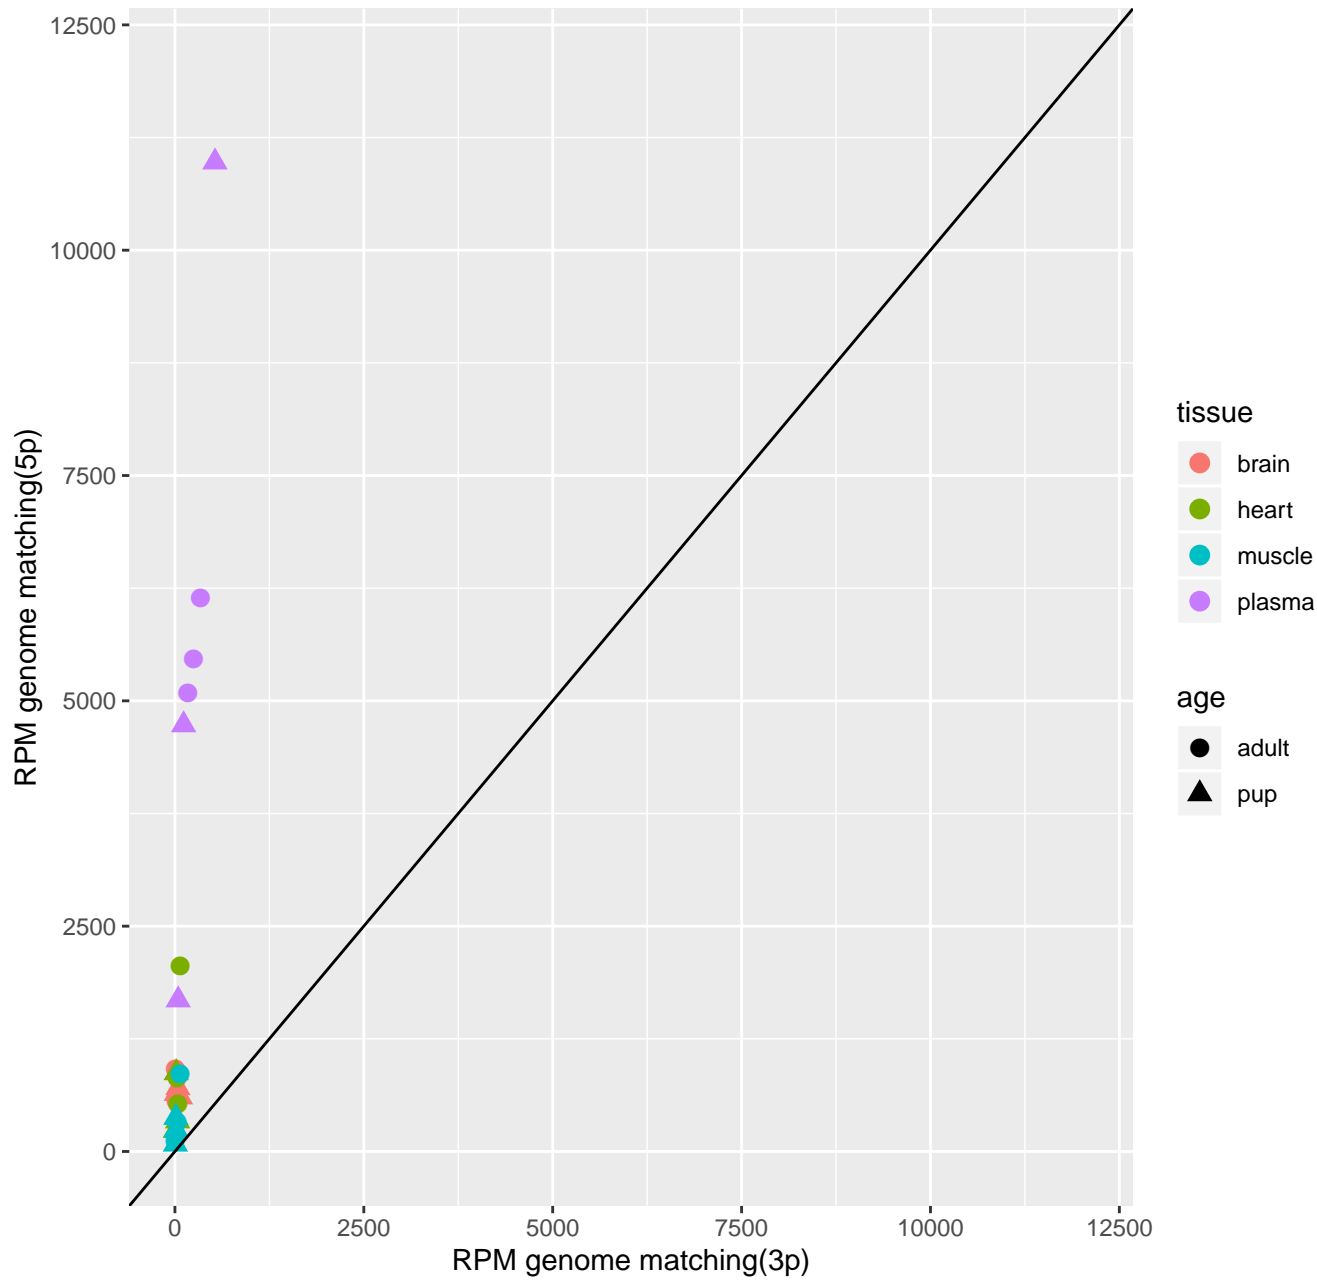

novel\_121

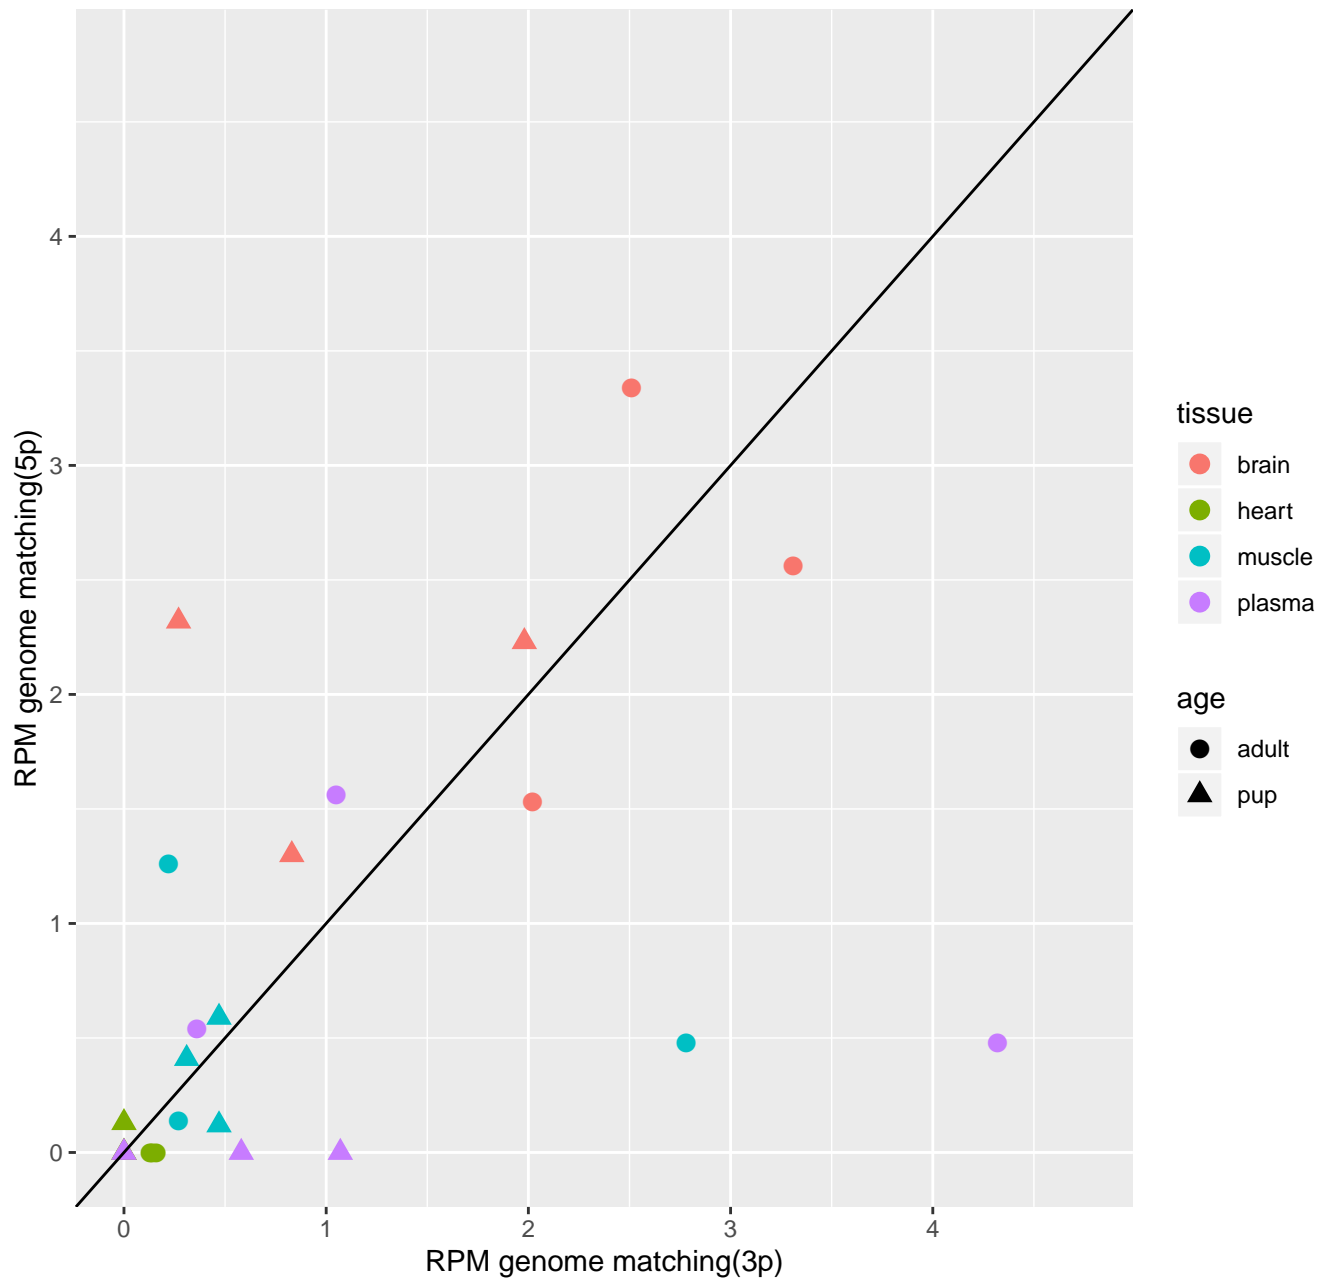

## lwe-miR-30b\_loc1

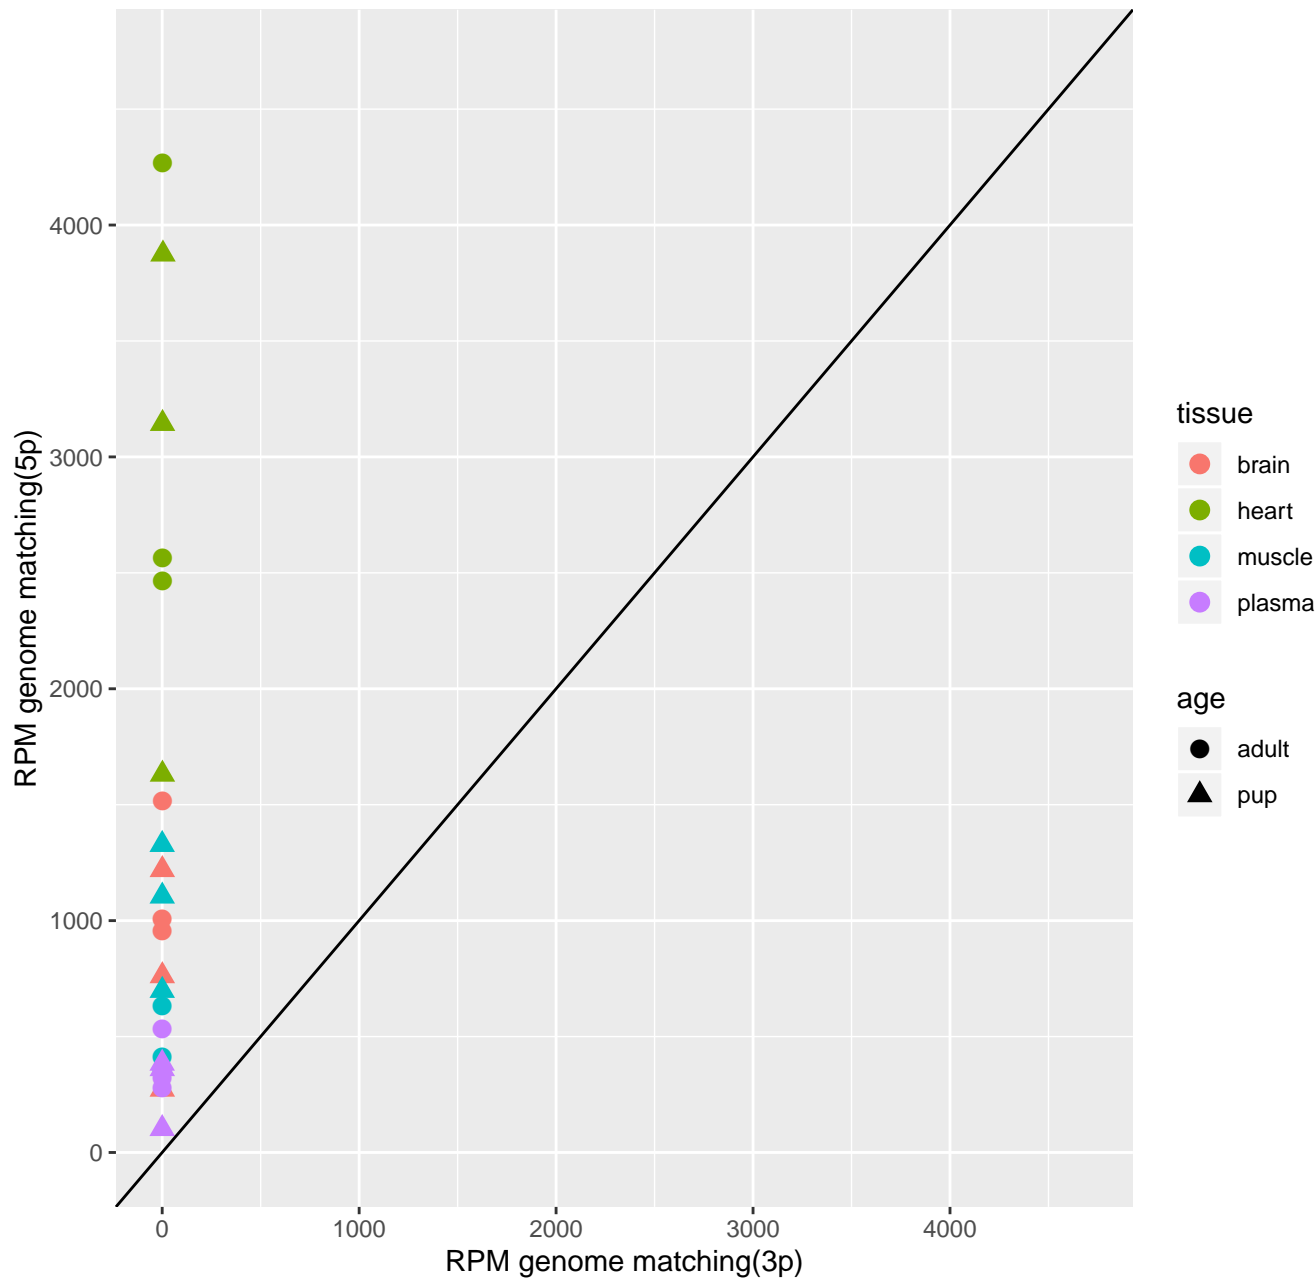

# lwe-miR-219\_loc3

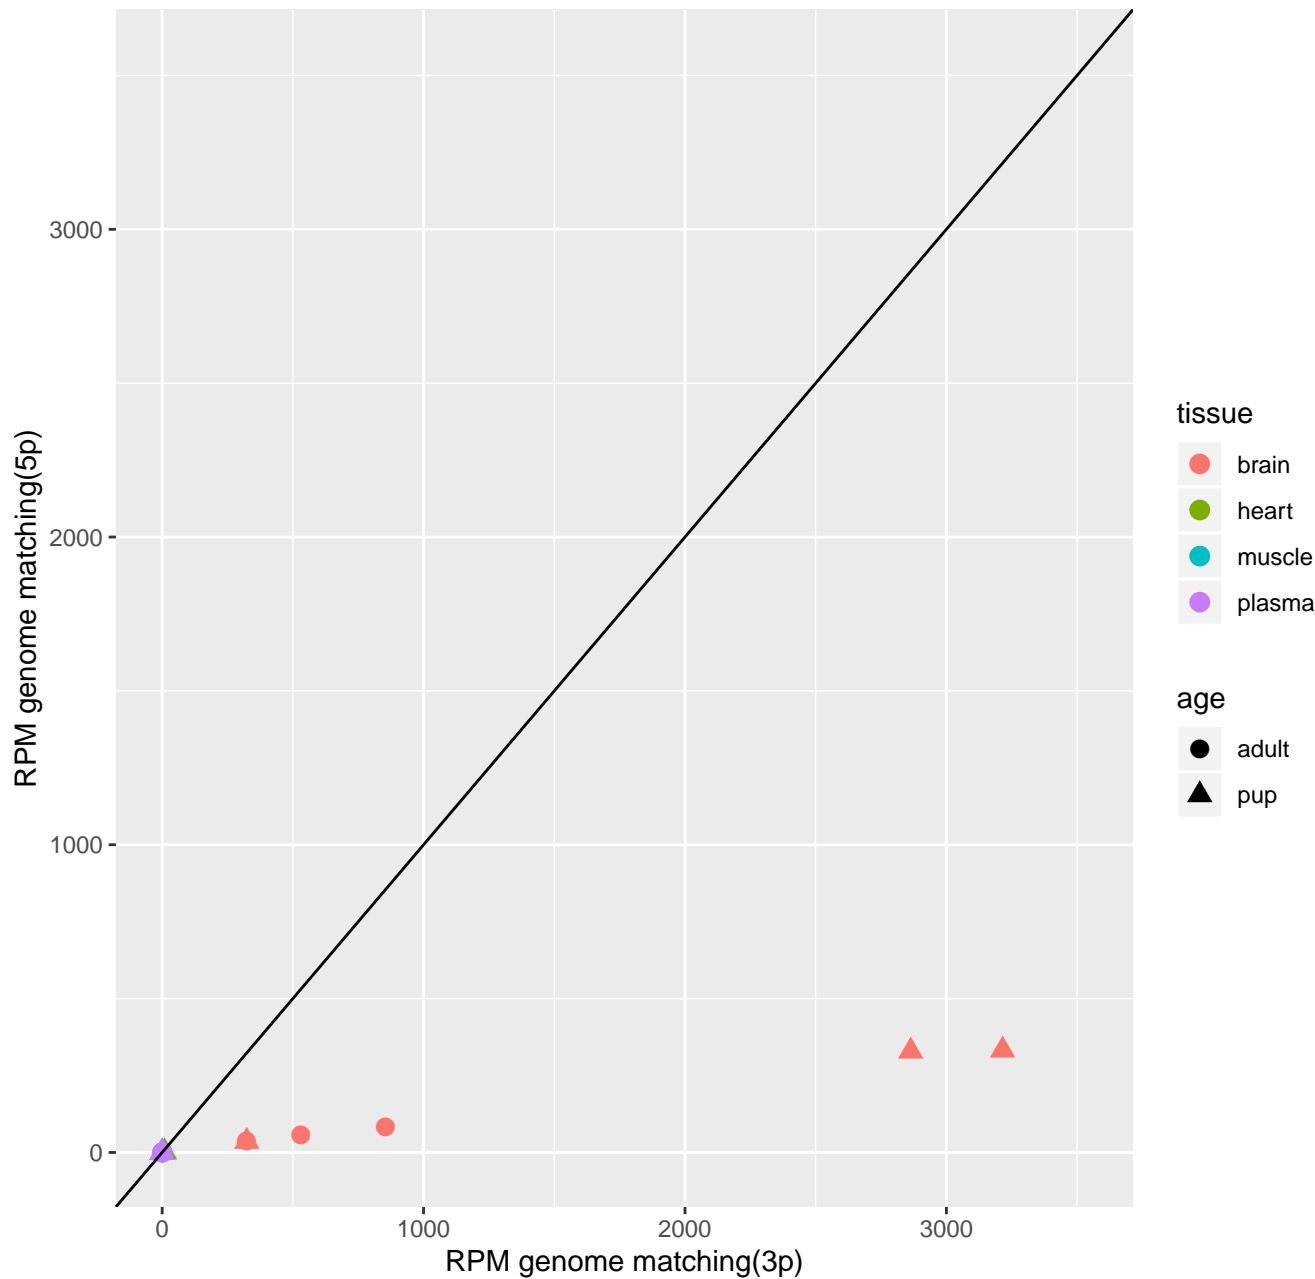

# lwe-miR-1388\_loc1

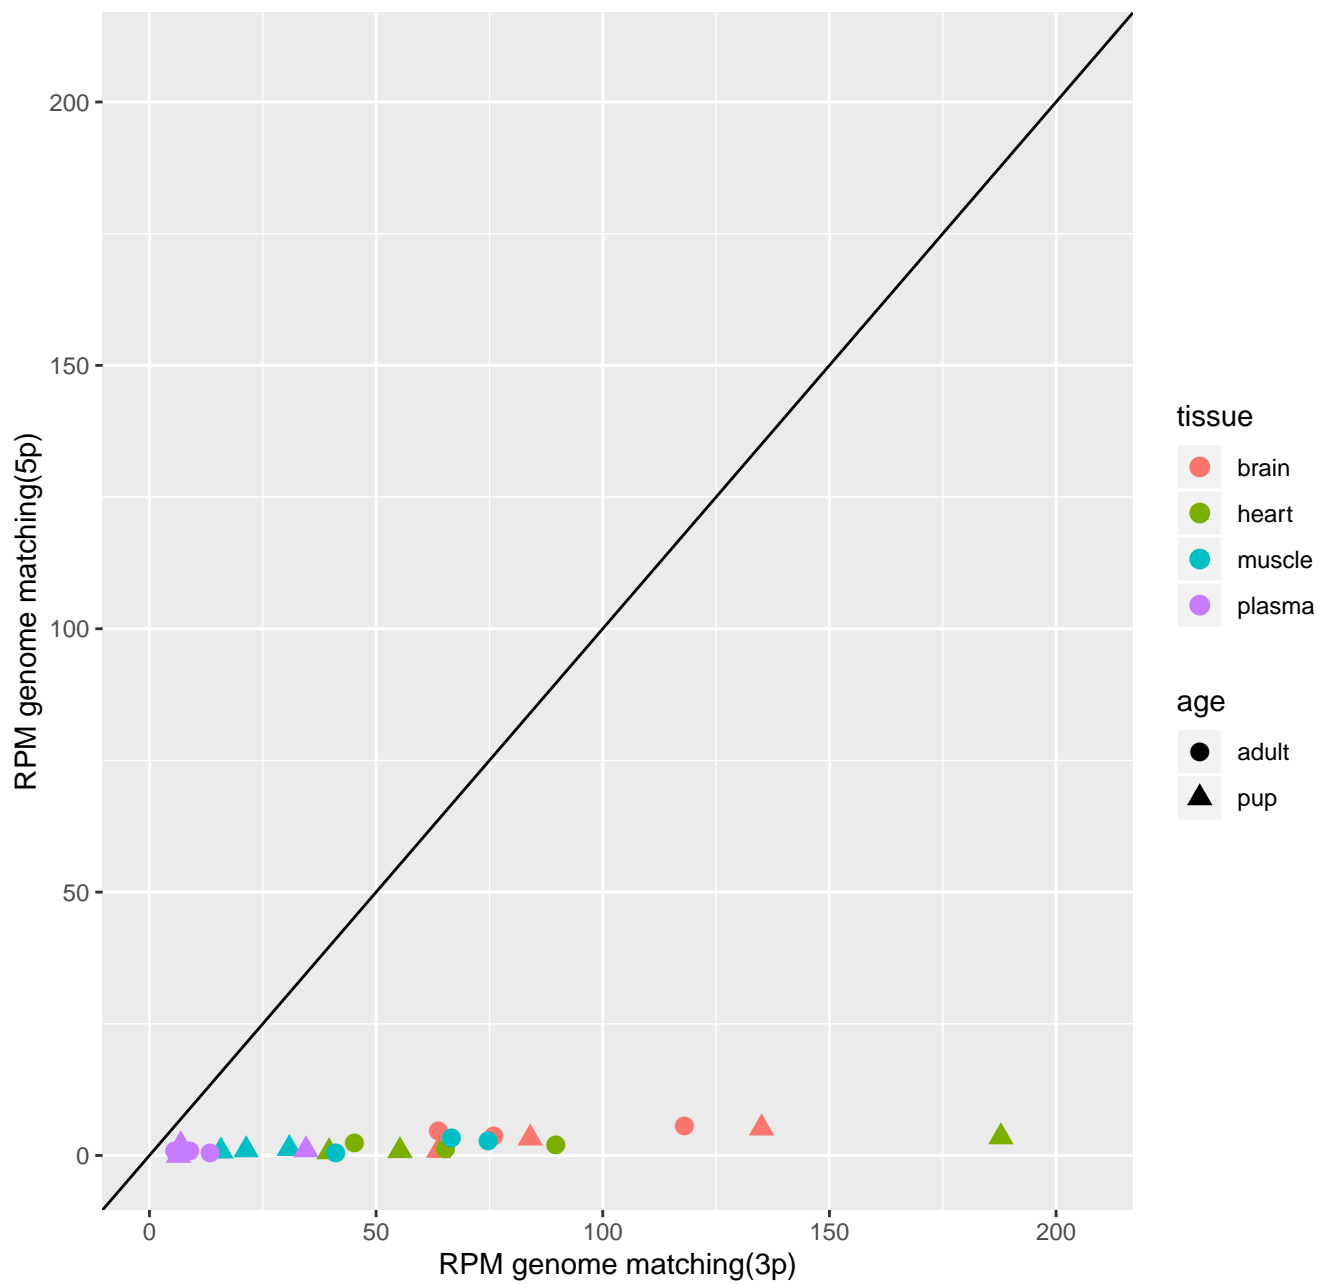

## lwe-miR-150\_loc1

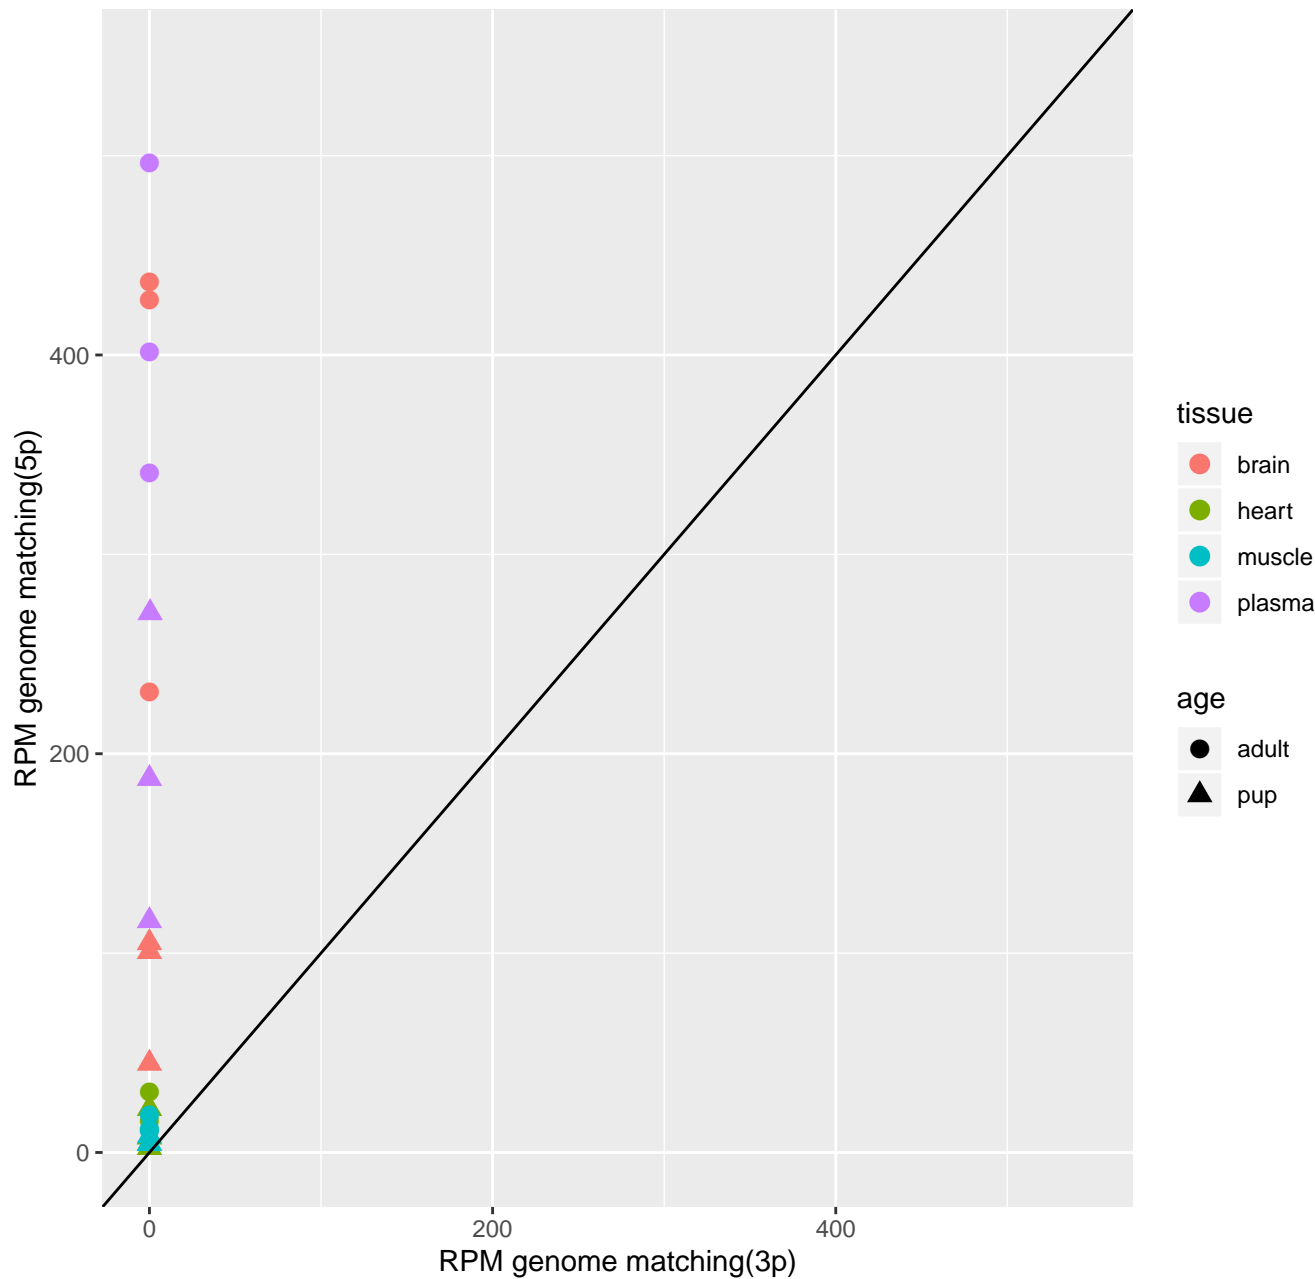

## lwe-miR-152\_loc1

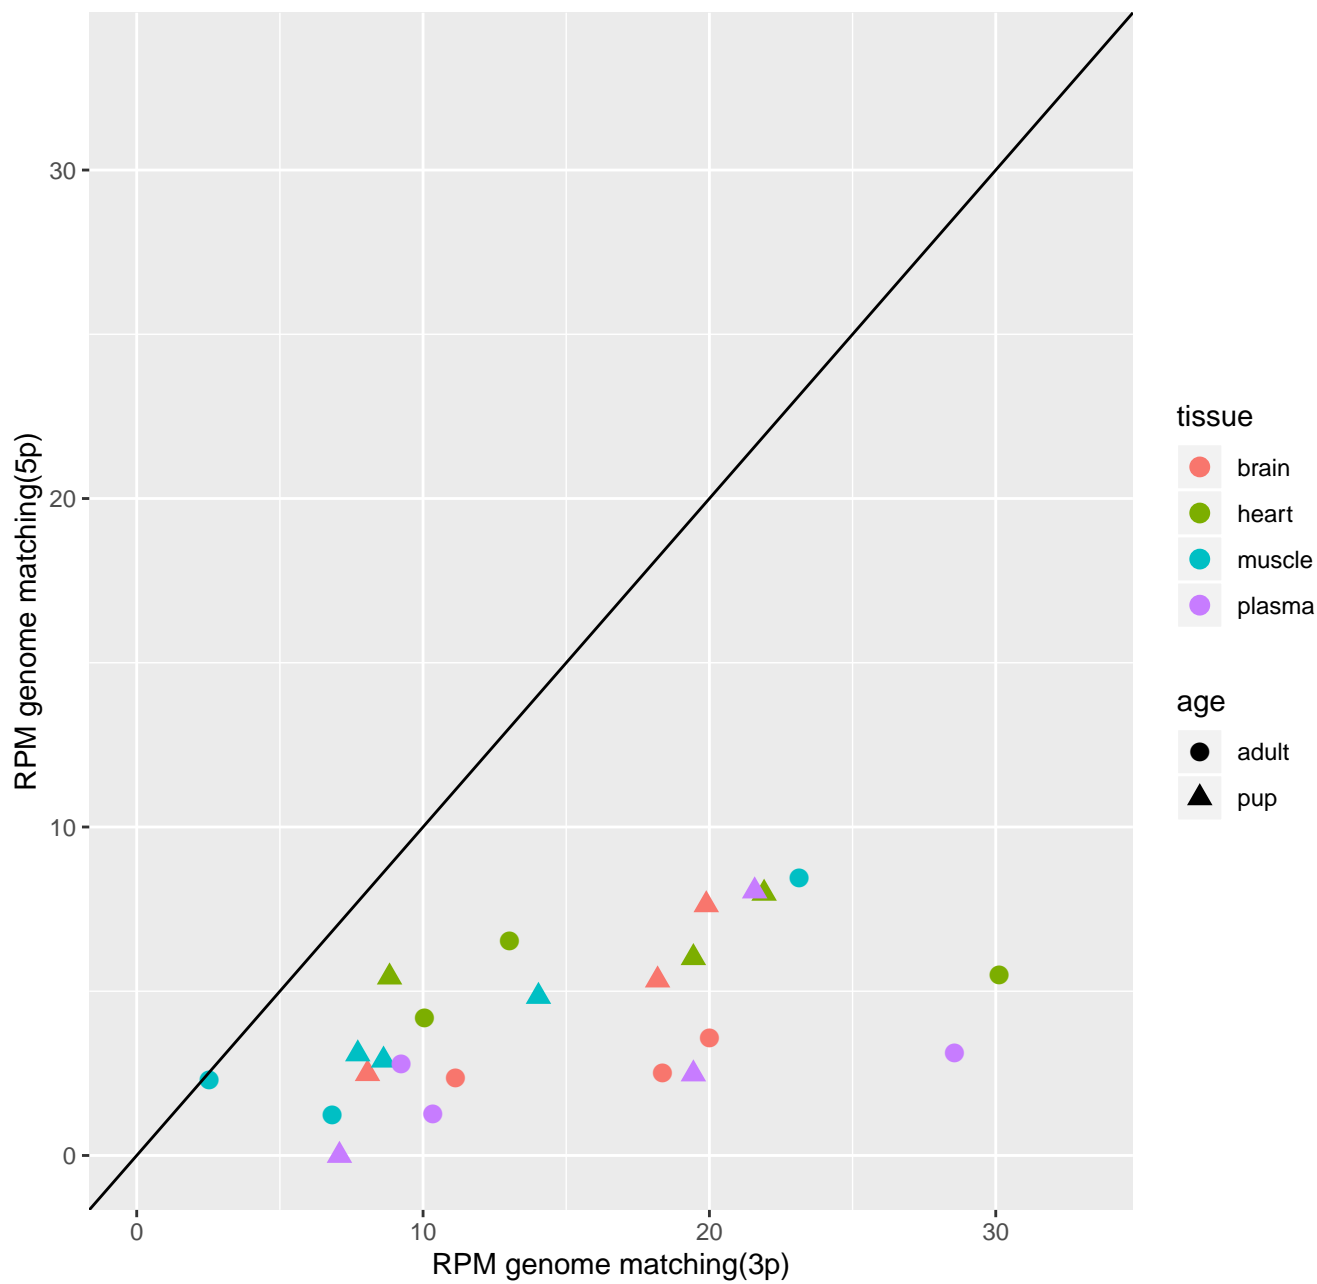

## lwe-miR-1842\_loc1

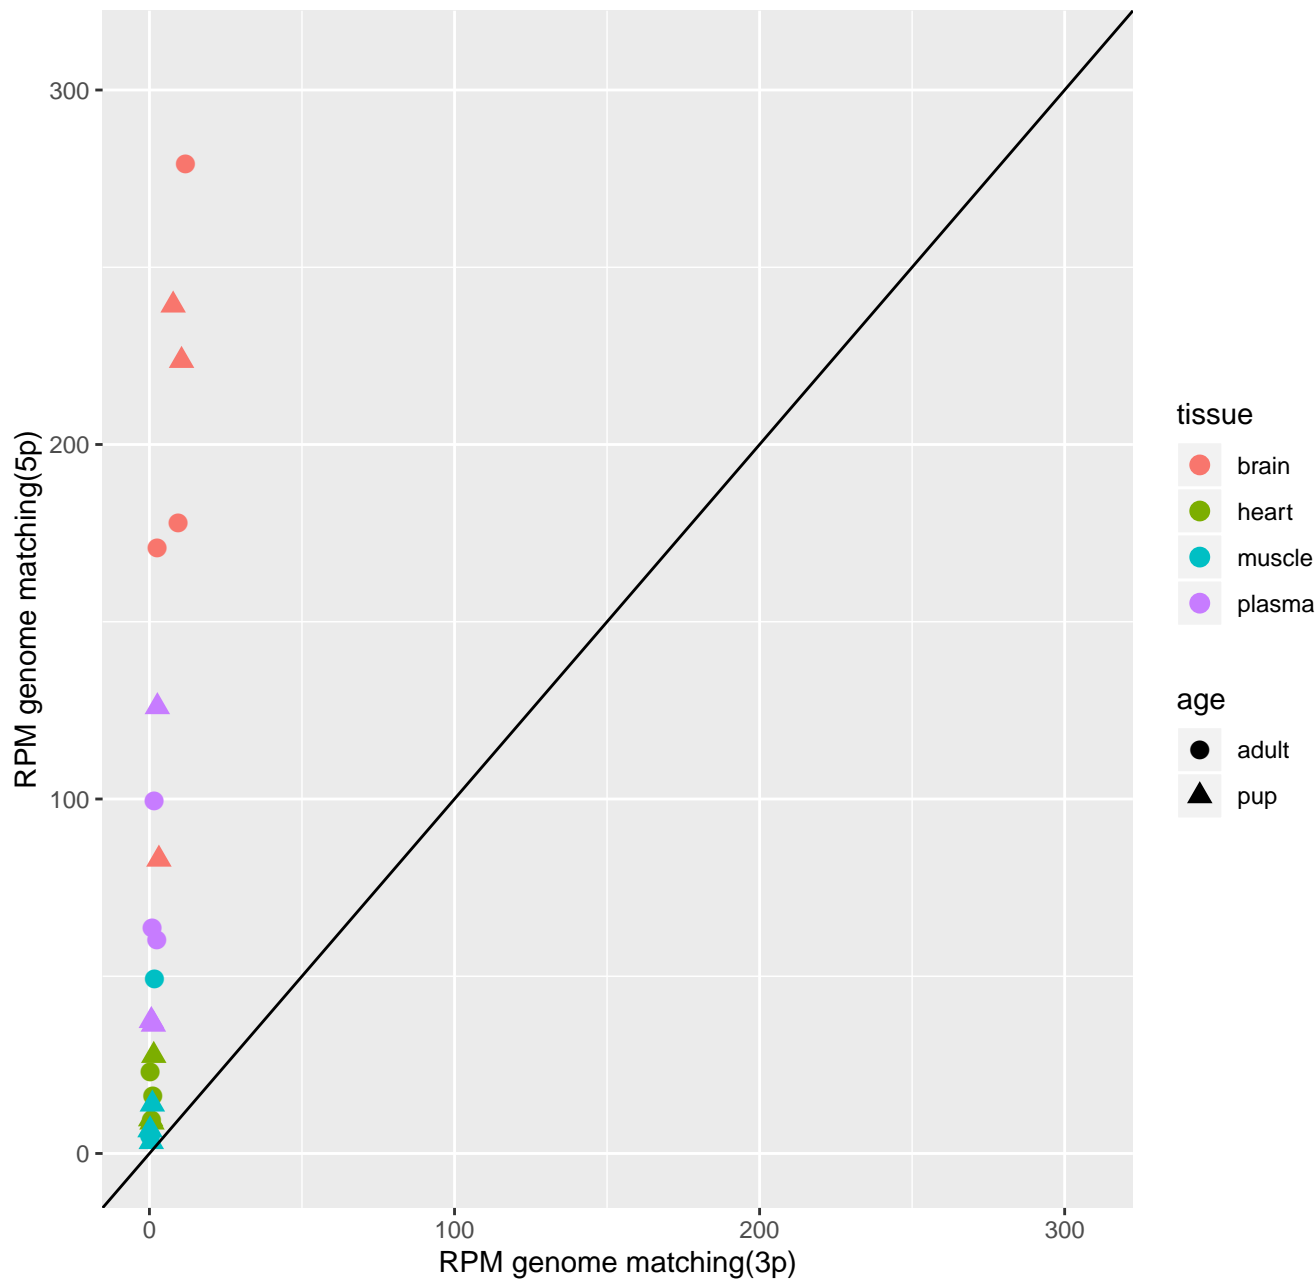



## lwe-miR-133\_loc3

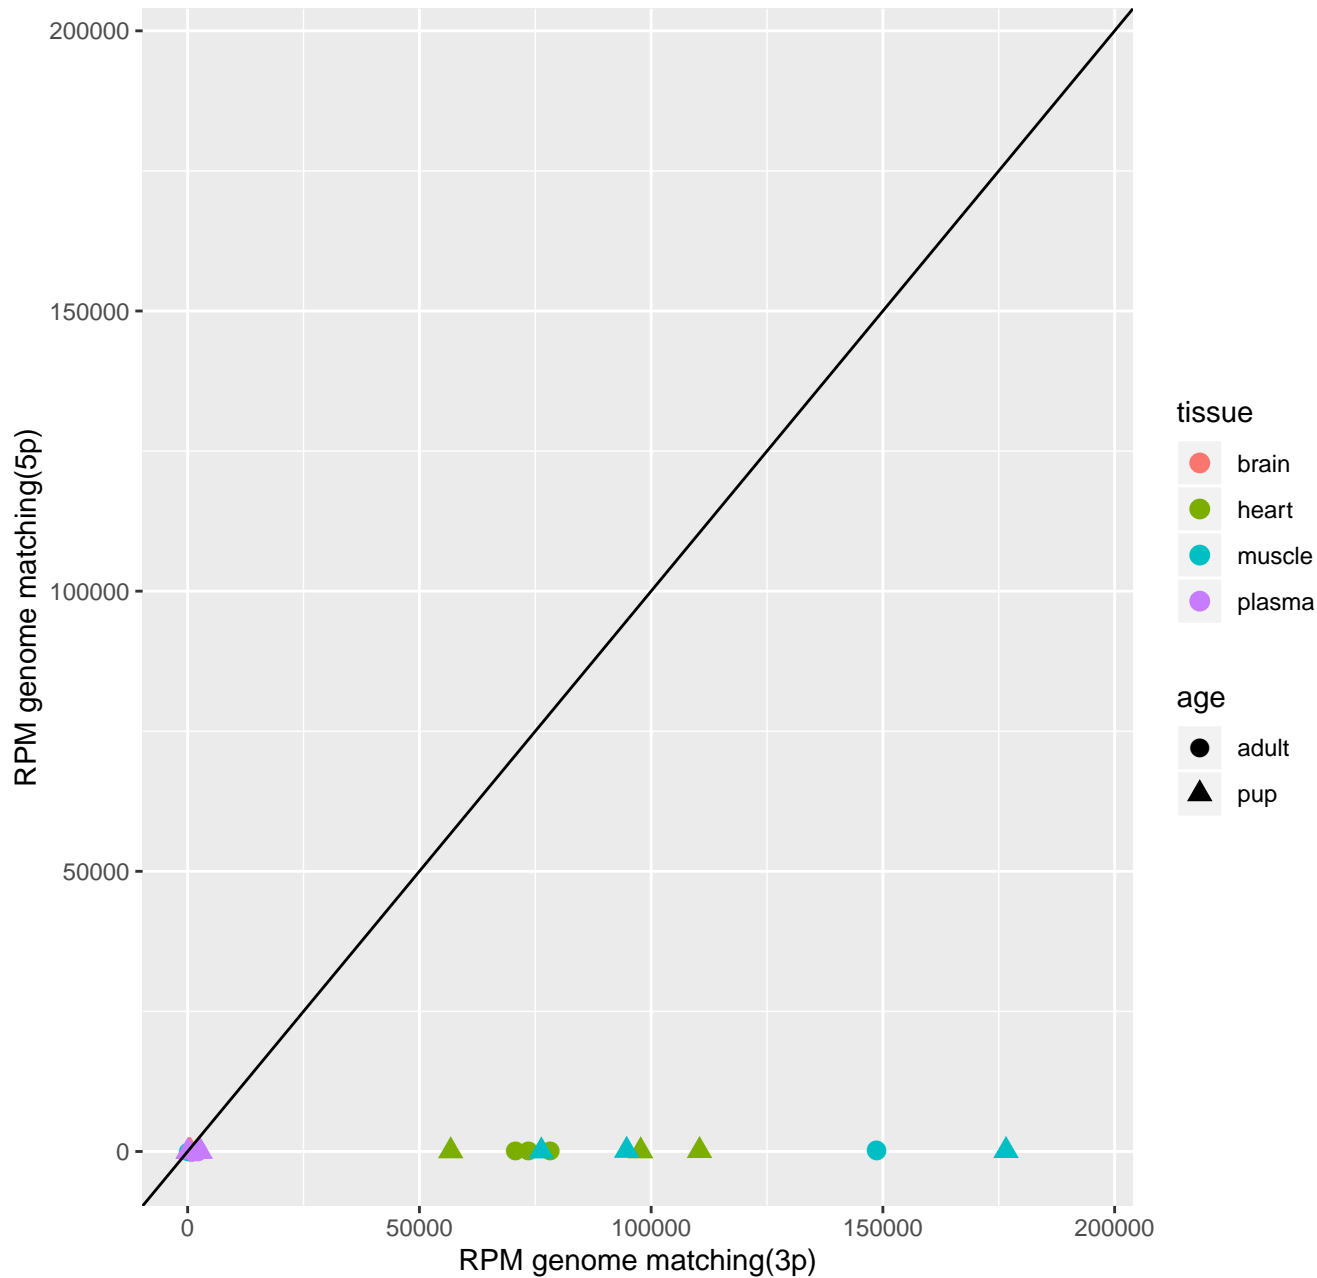

## lwe-miR-1\_loc2

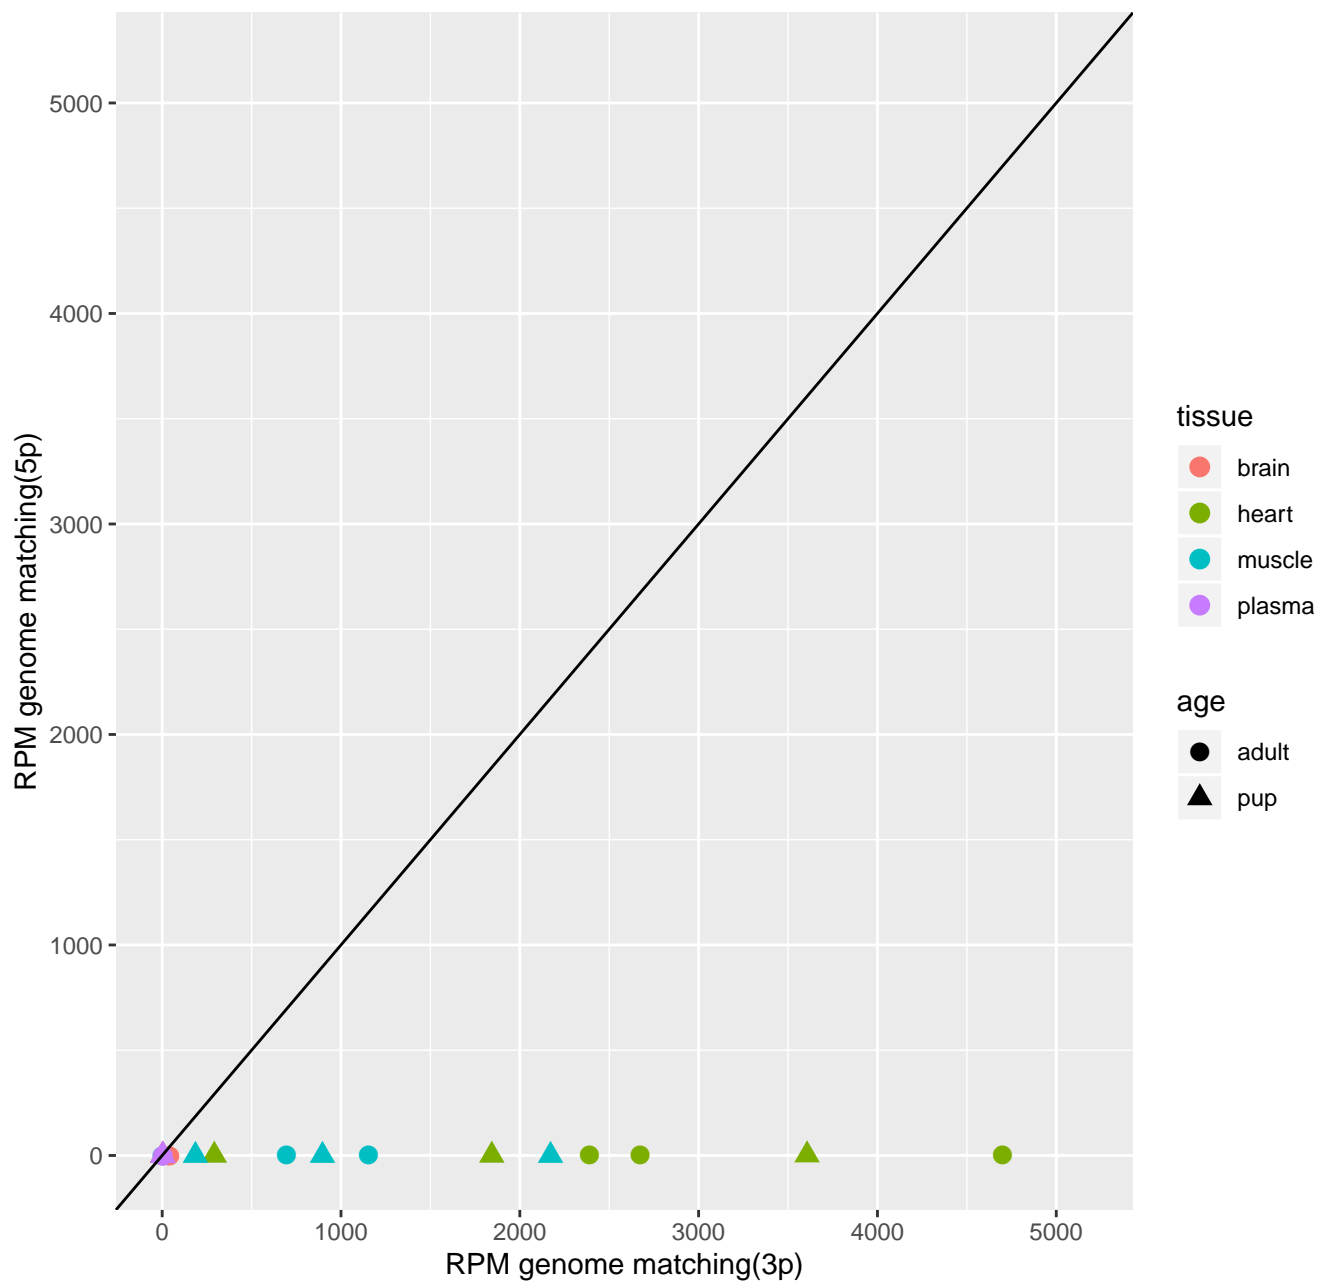

# lwe-miR-493b\_loc1

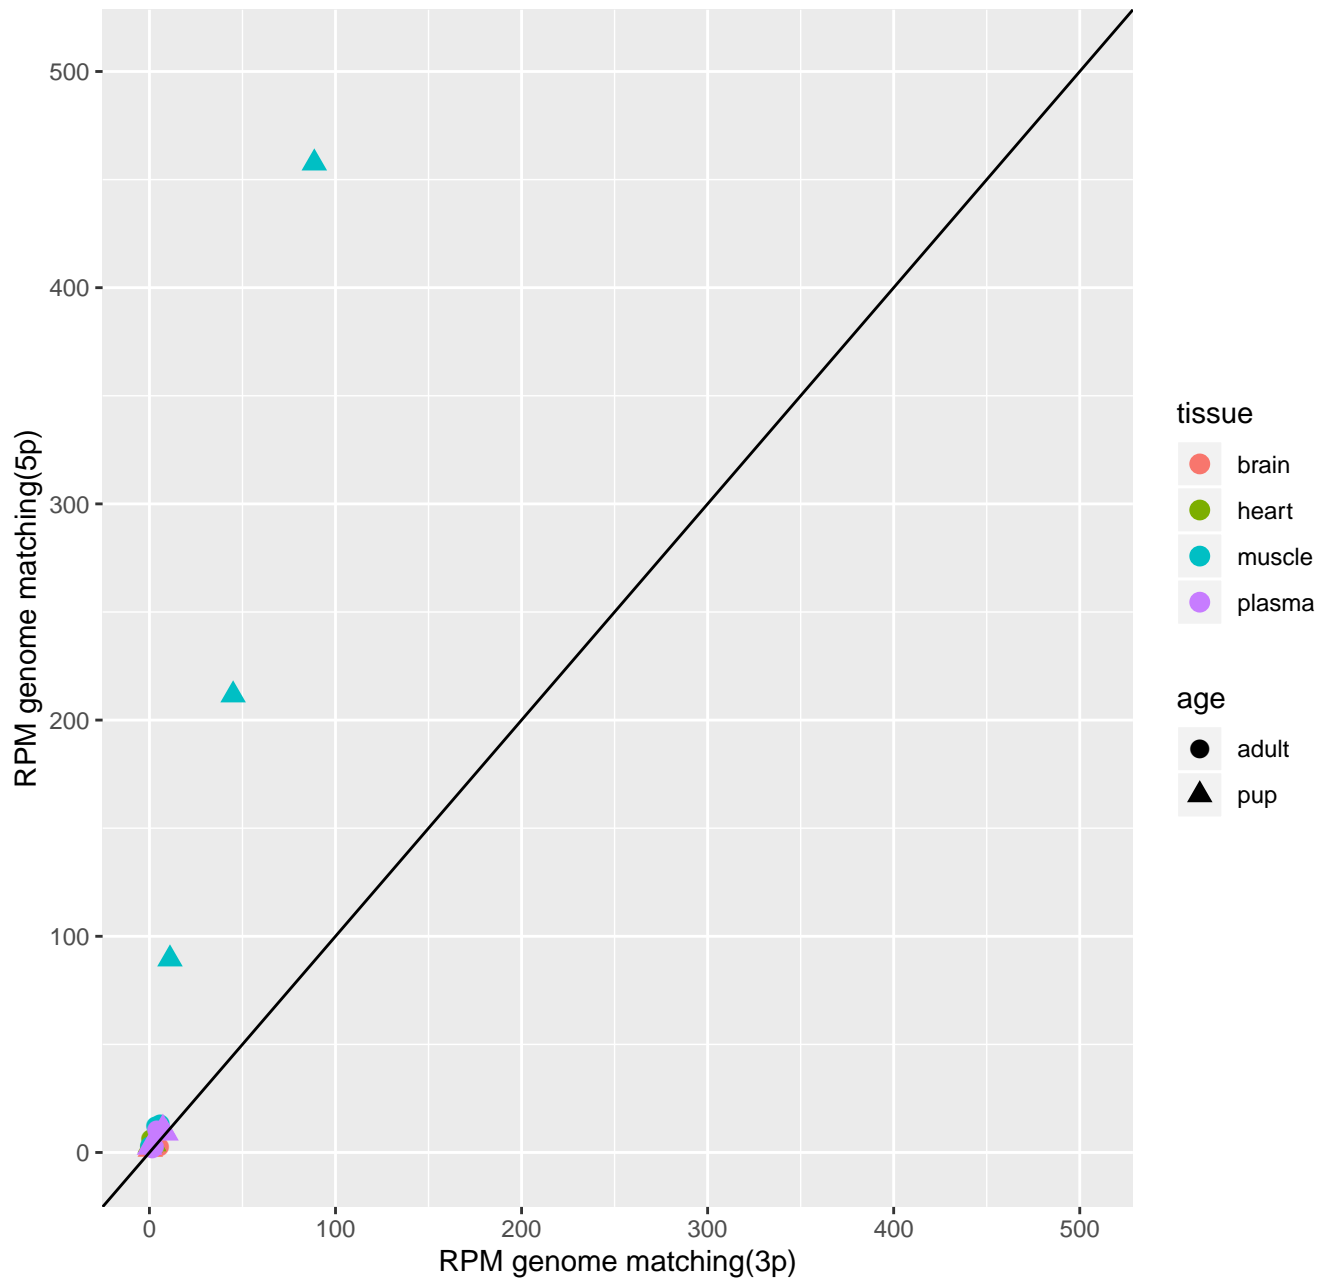

## lwe-miR-431\_loc1

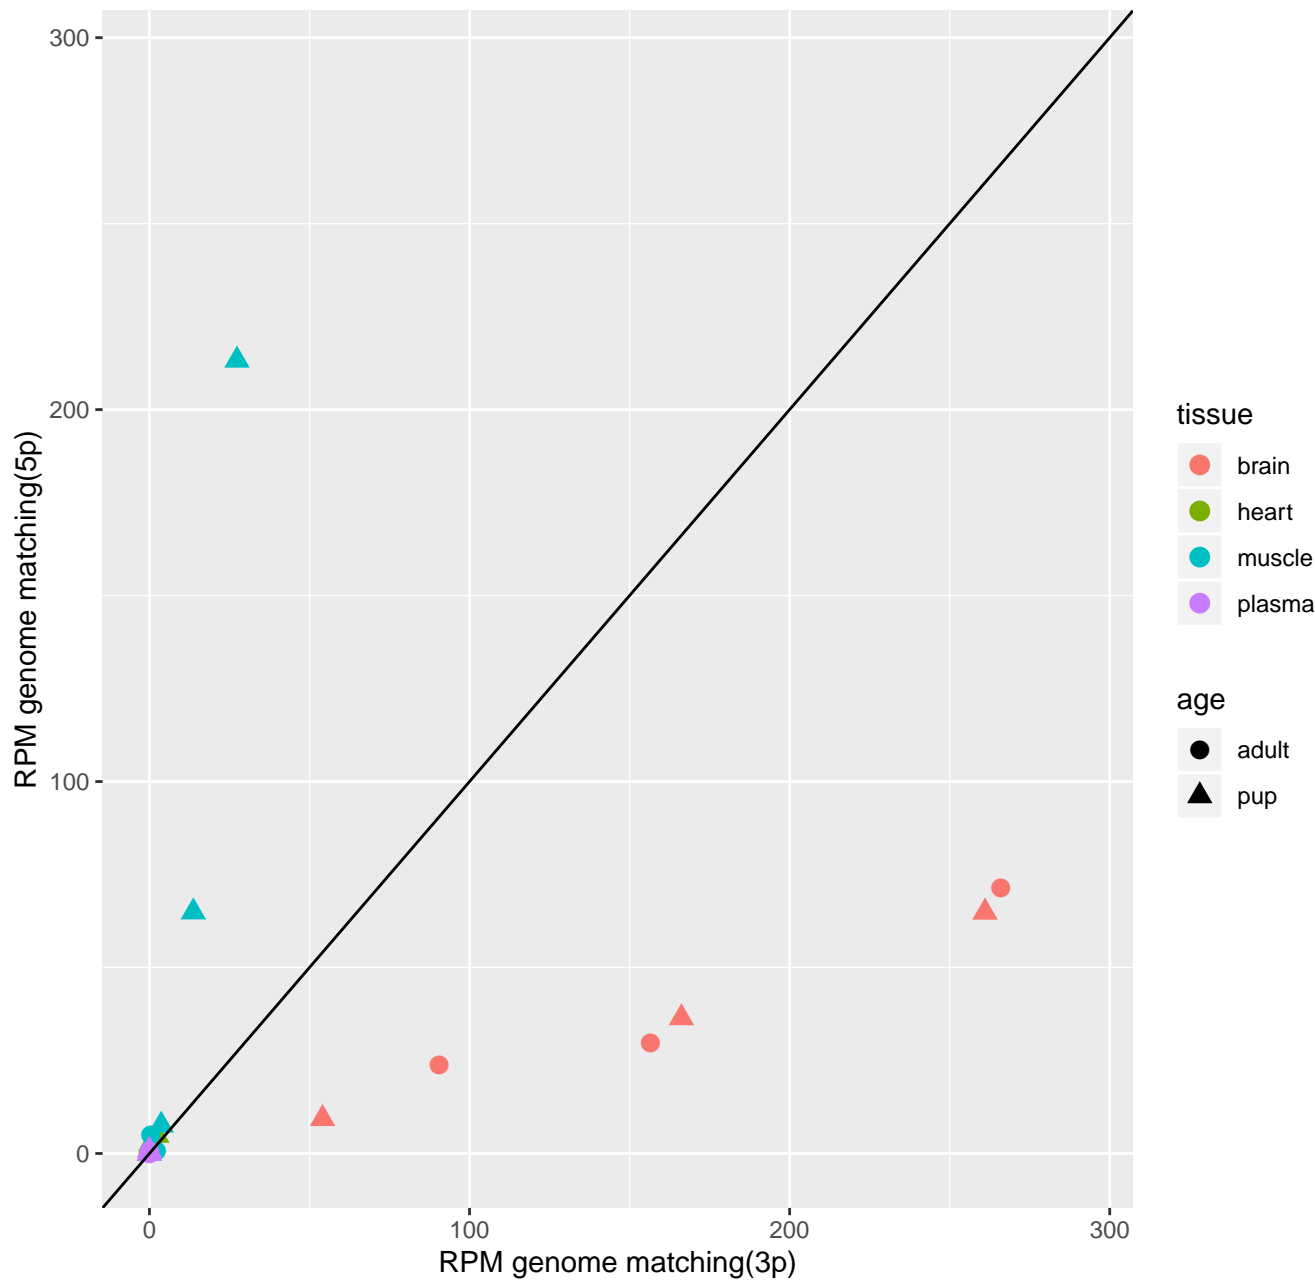

# lwe-miR-370\_loc1

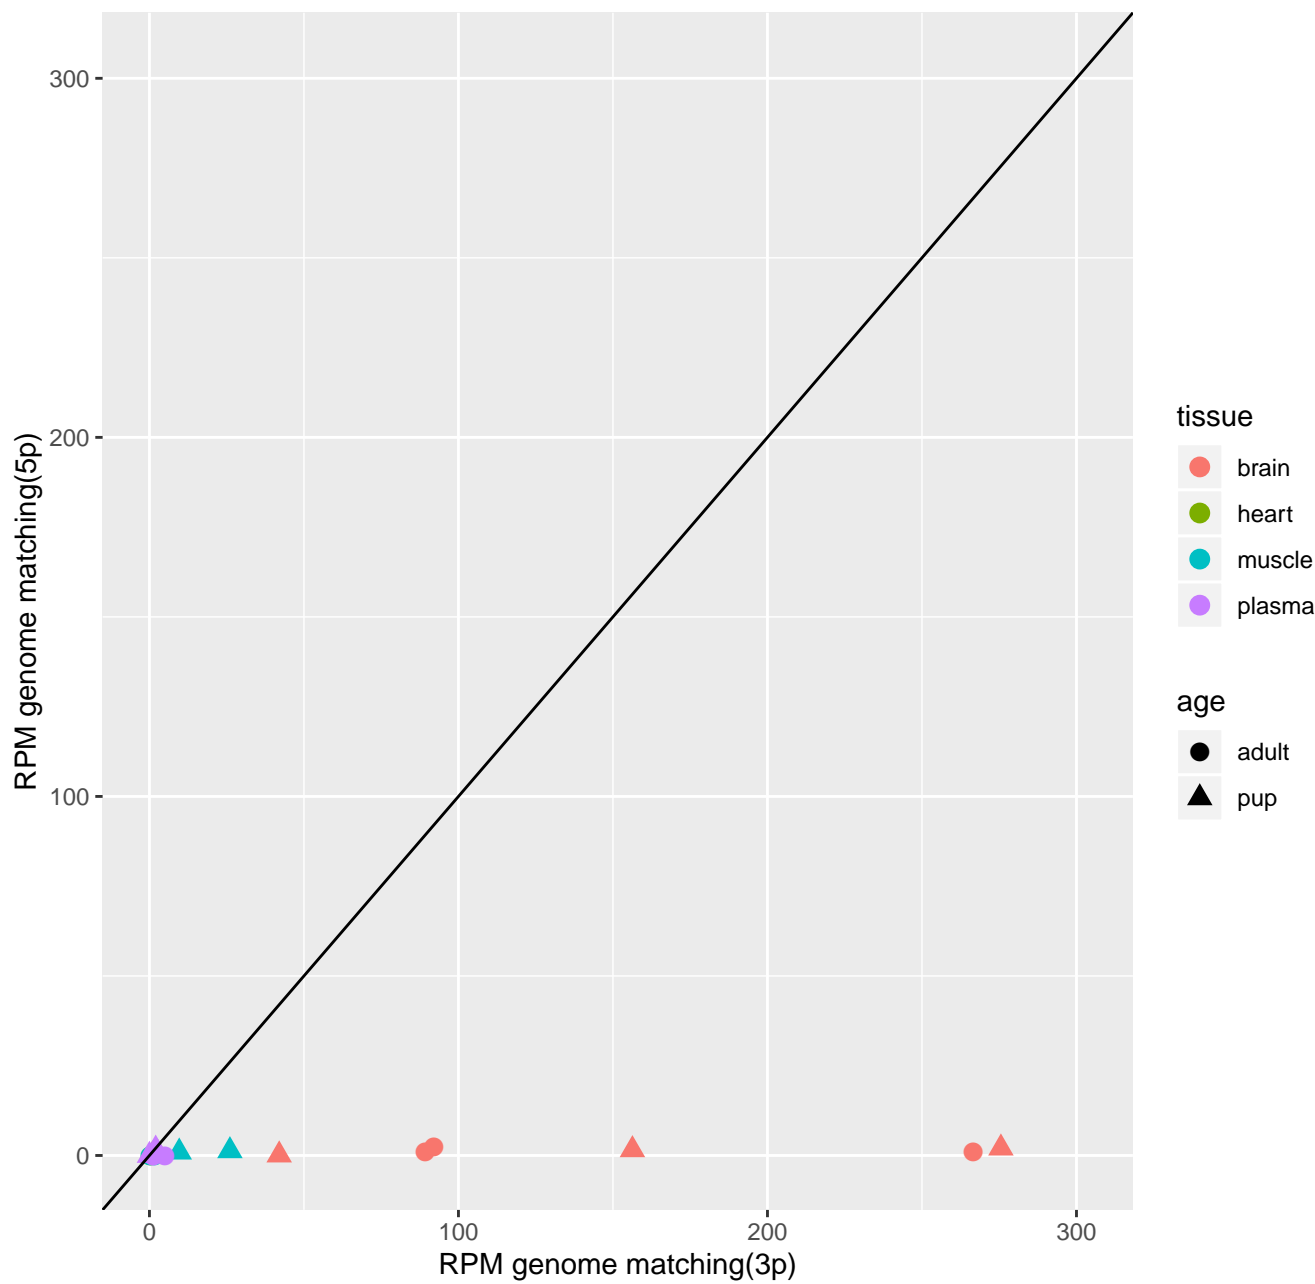

# lwe-miR-196\_loc2

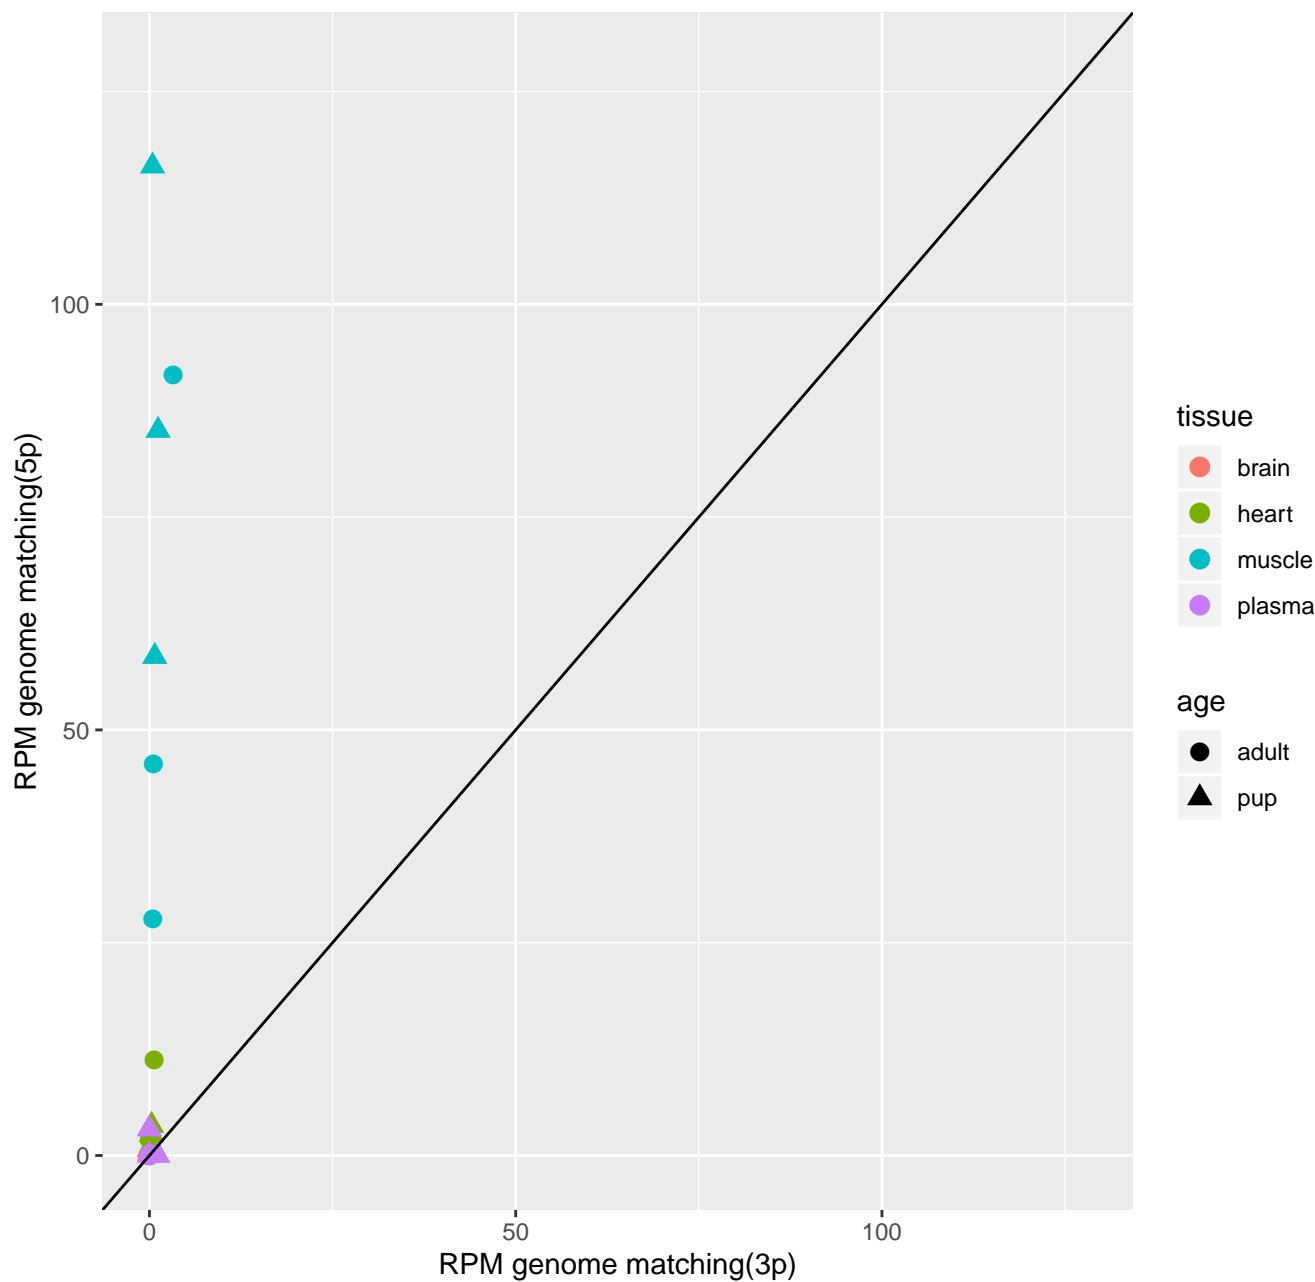

# lwe-miR-10a\_loc1

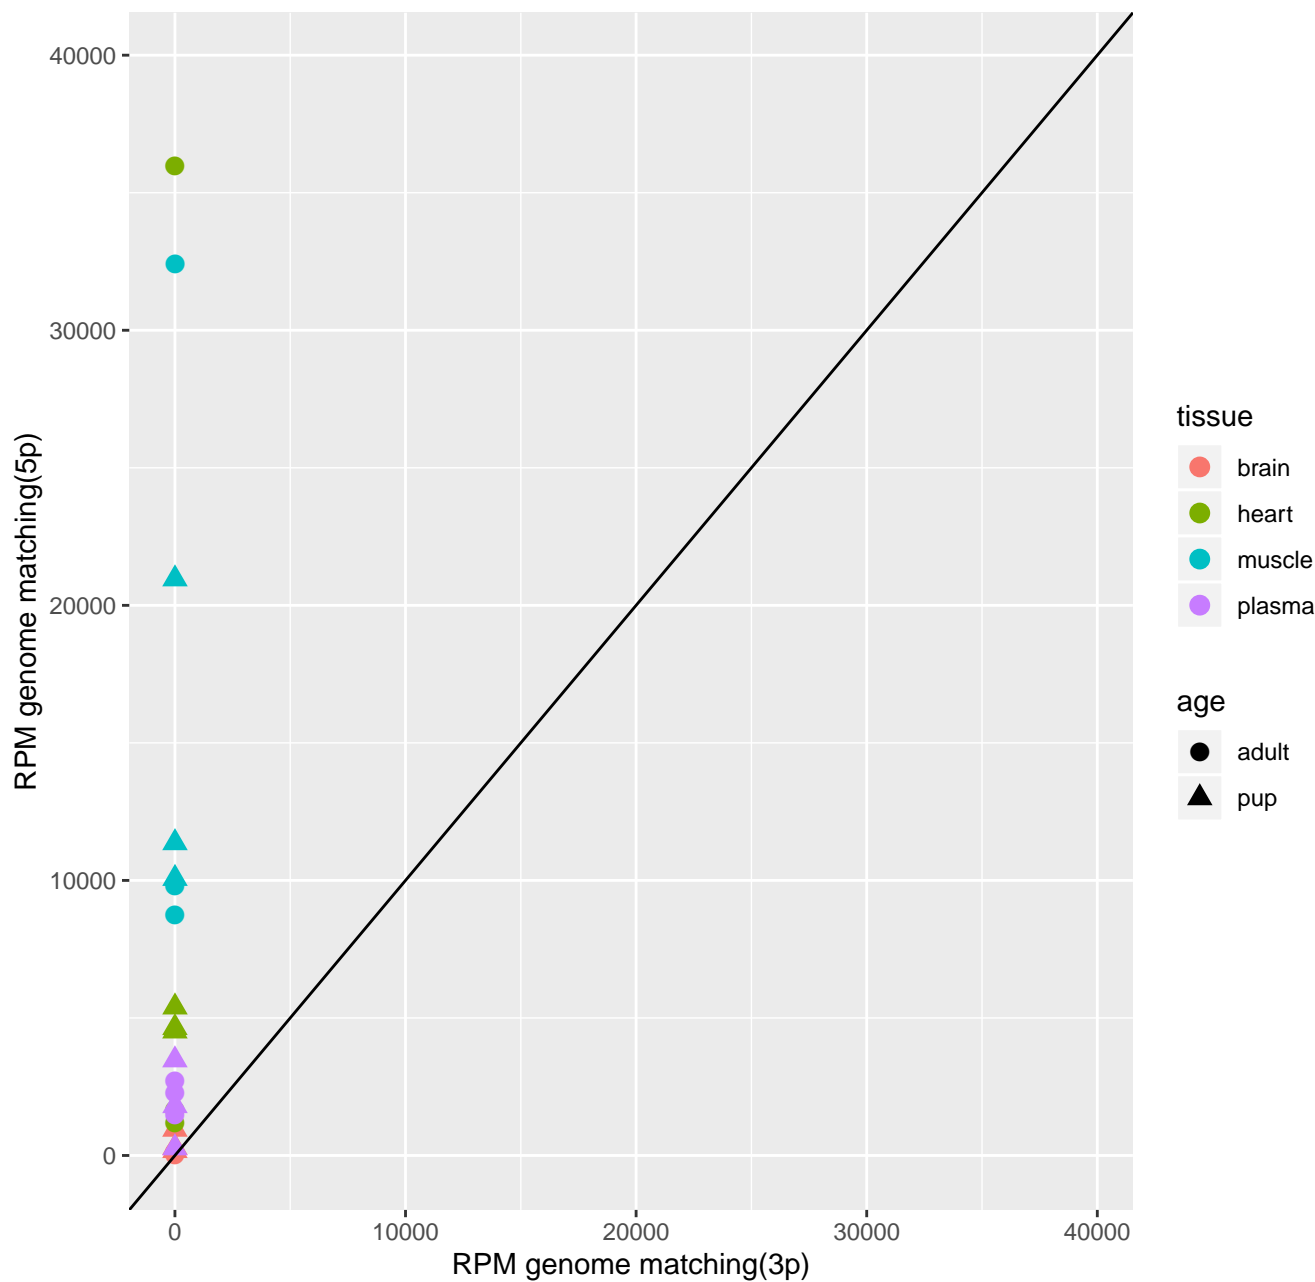

## lwe-miR-2355\_loc1

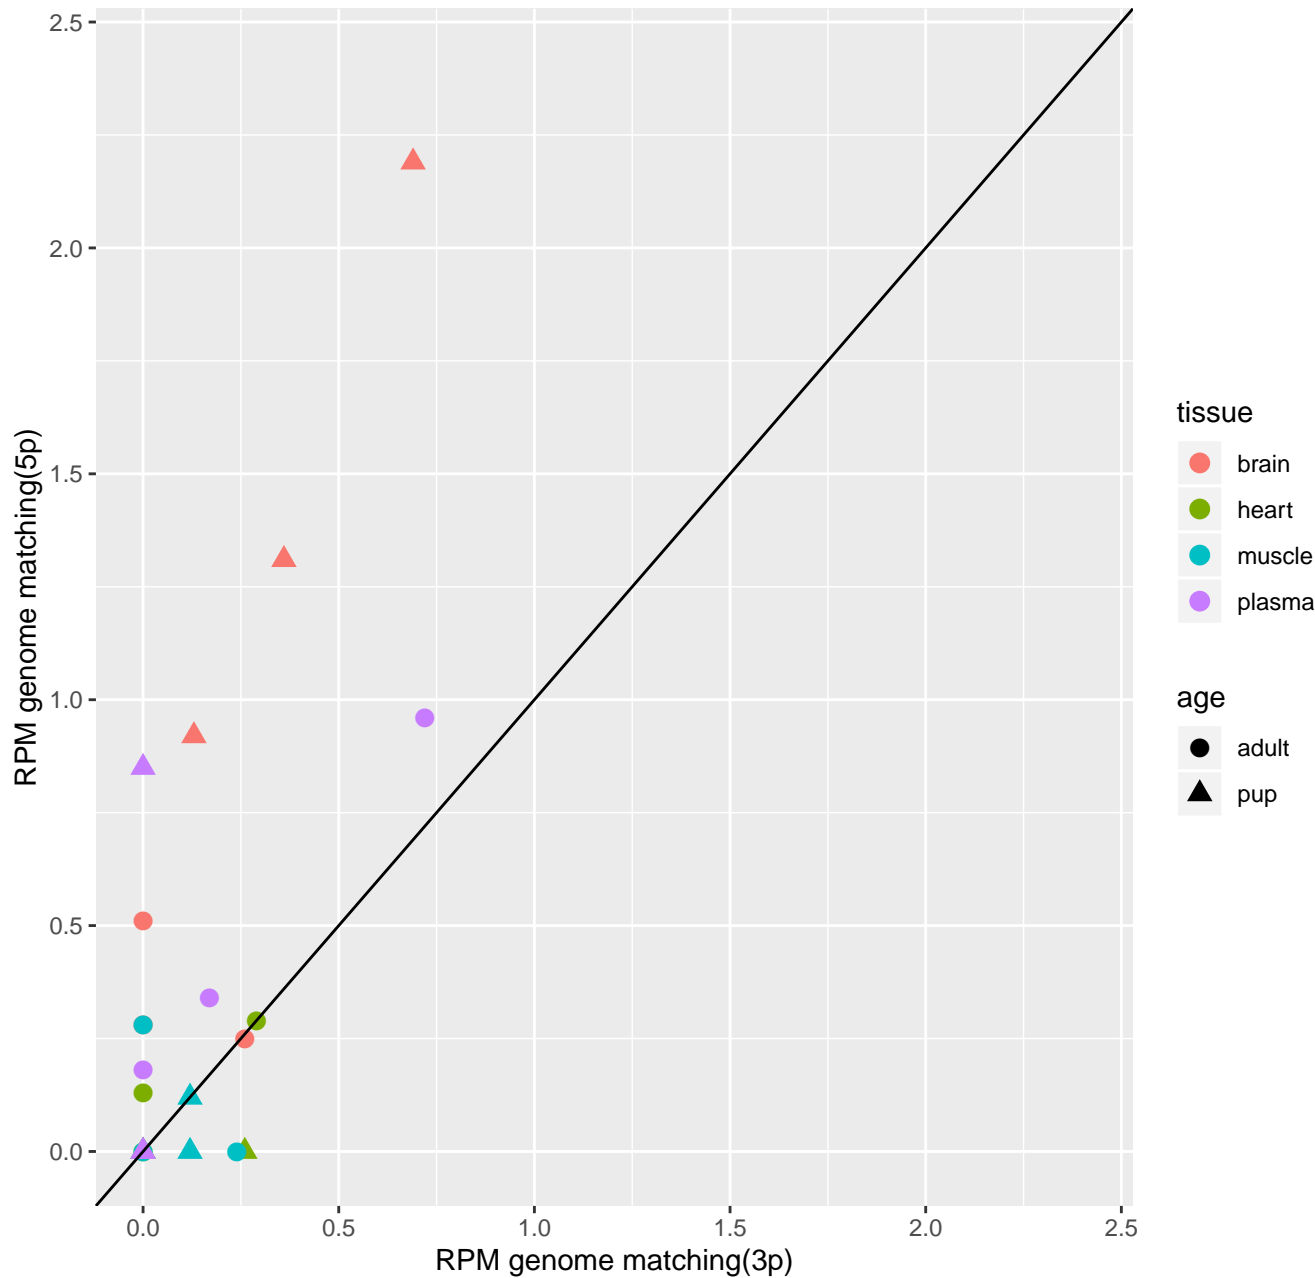





# lwe-miR-183\_loc1

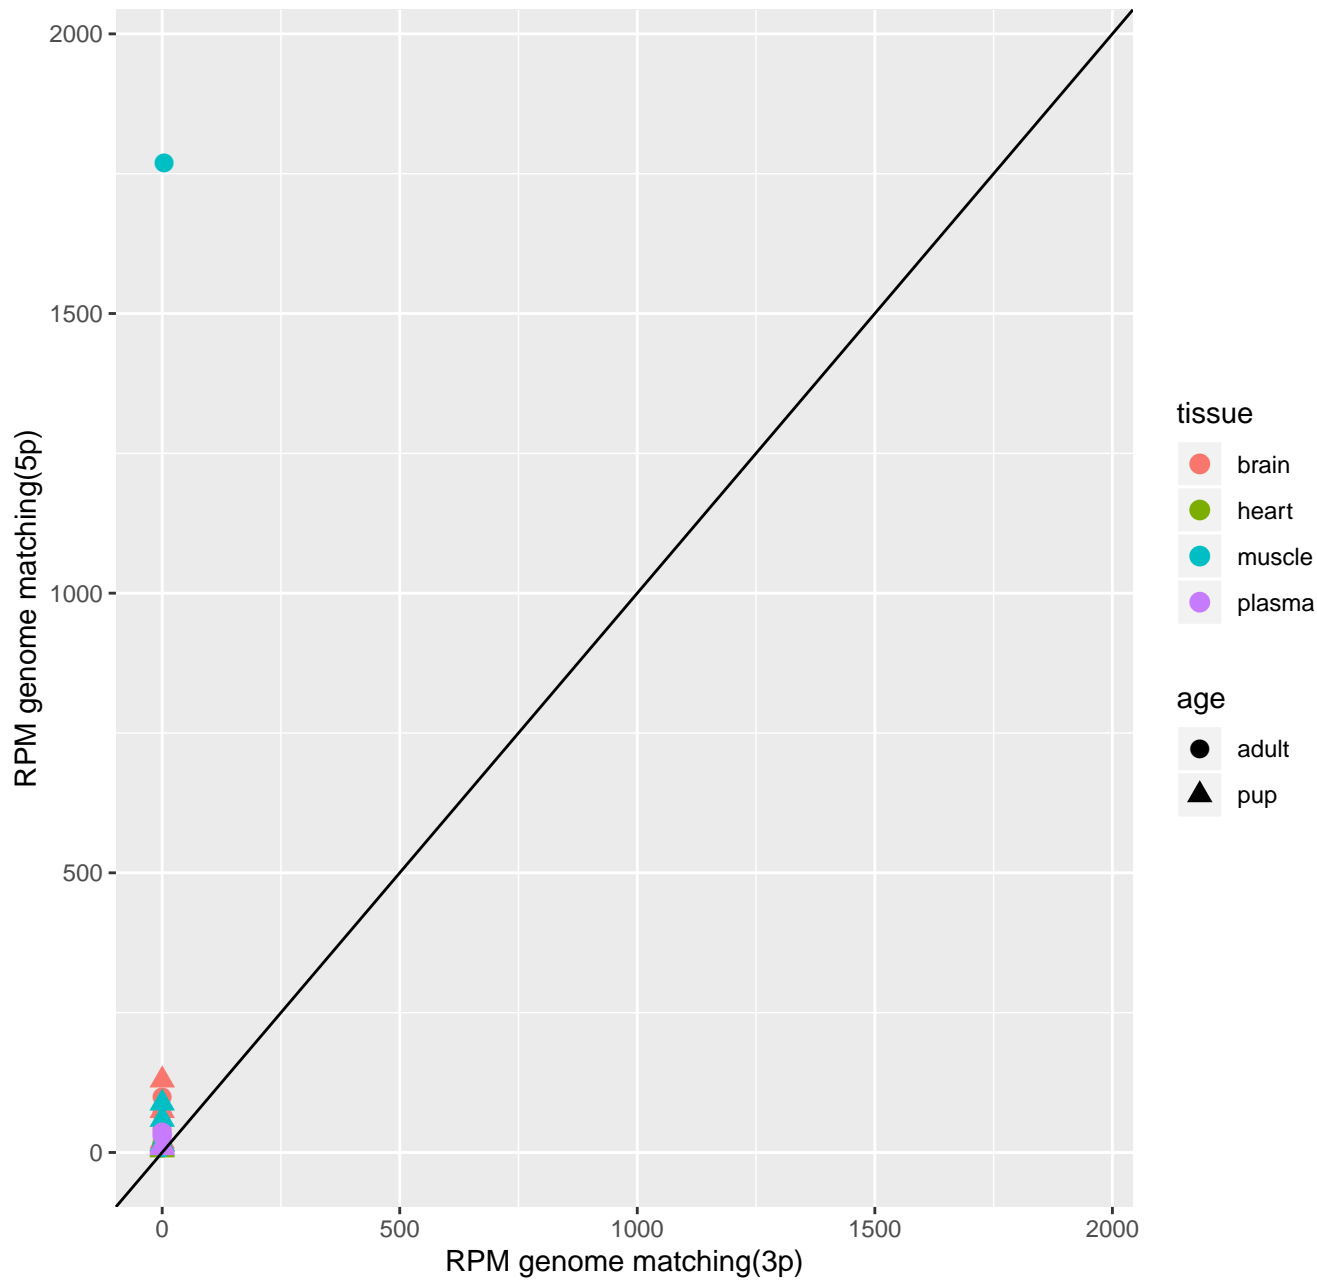

novel\_123

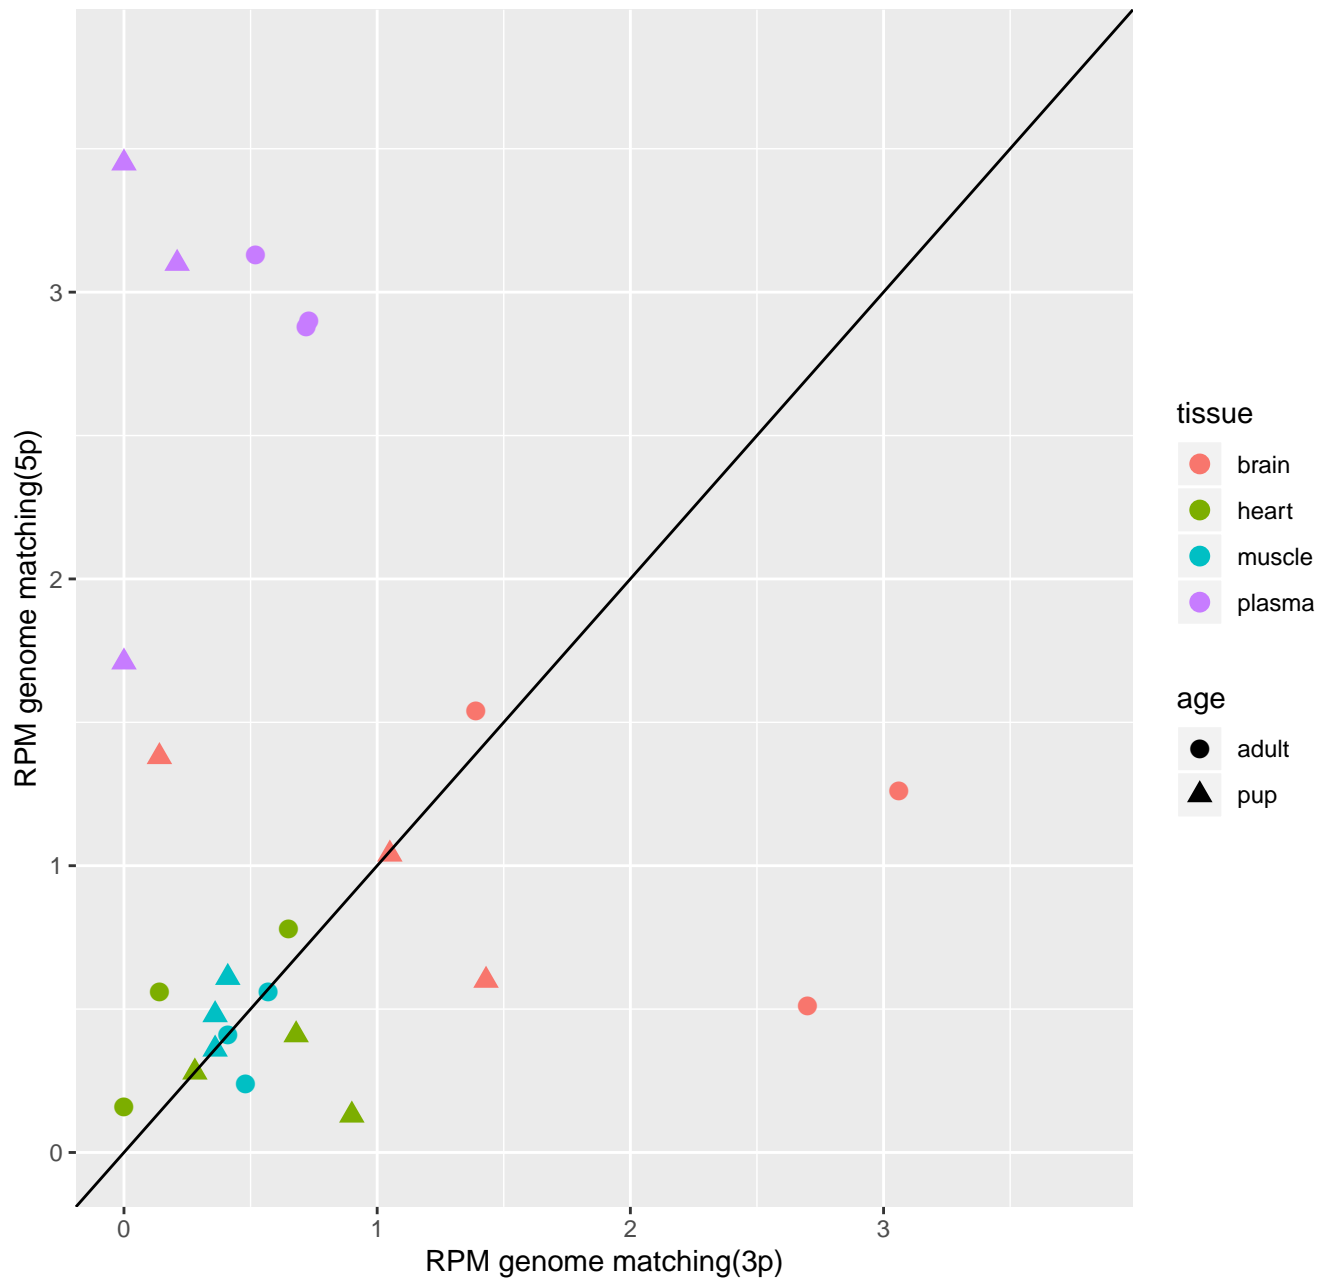

## novel\_124

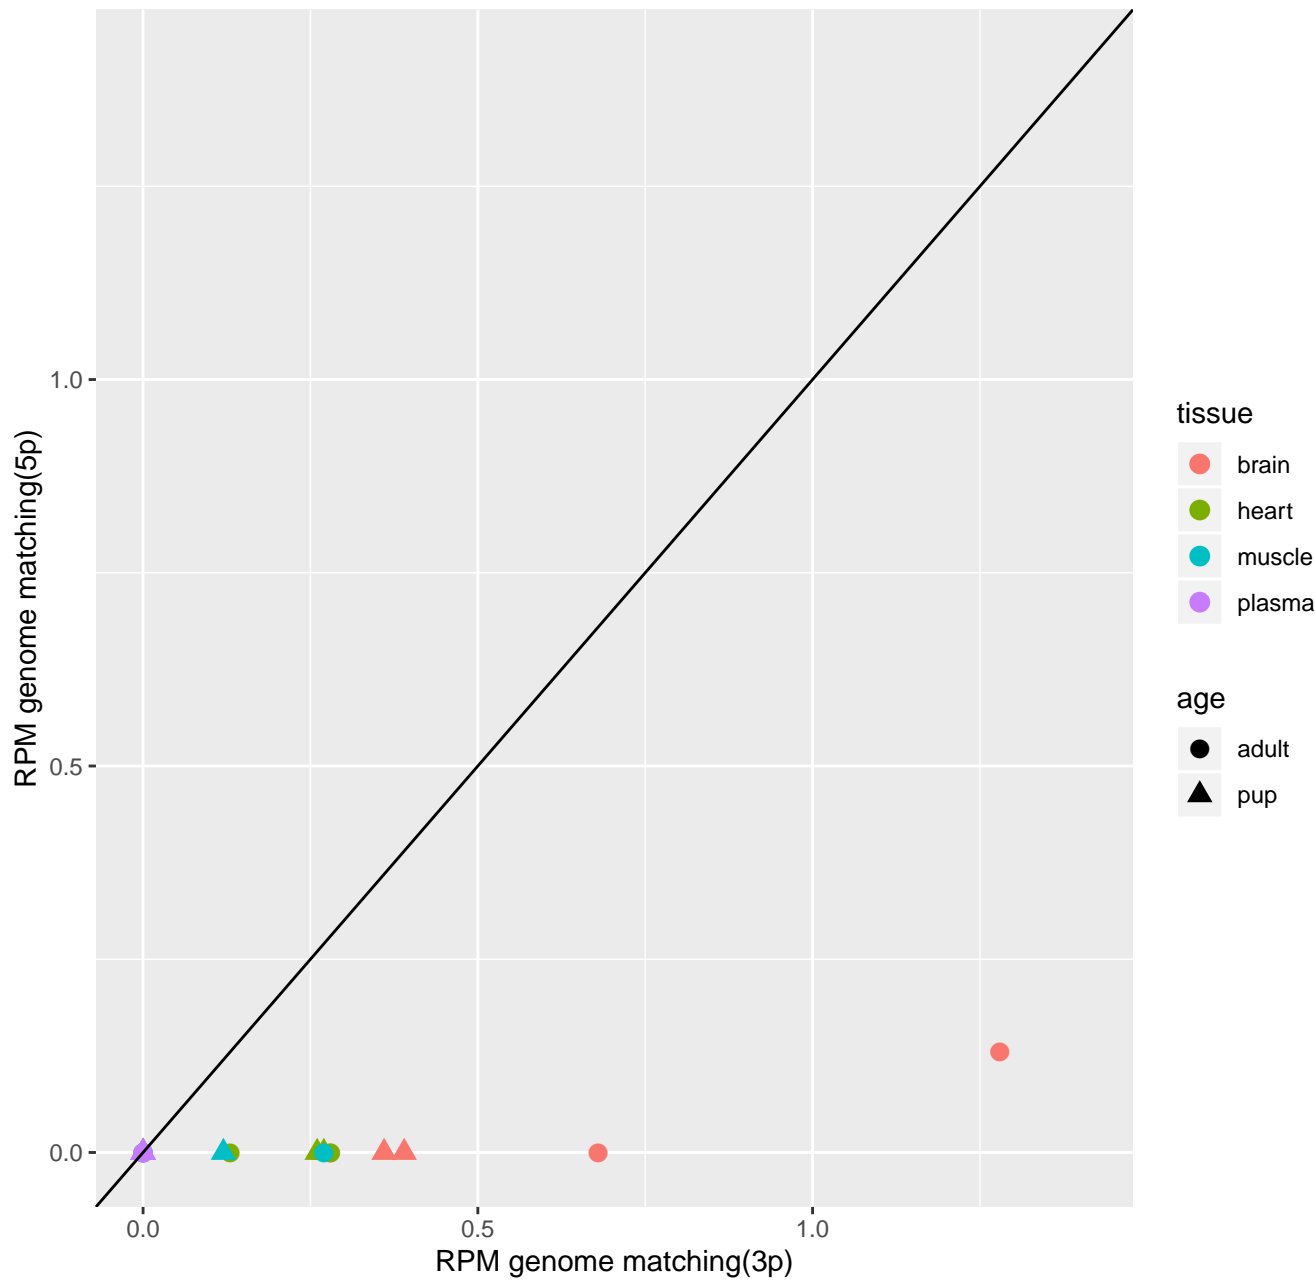

# lwe-miR-885\_loc1

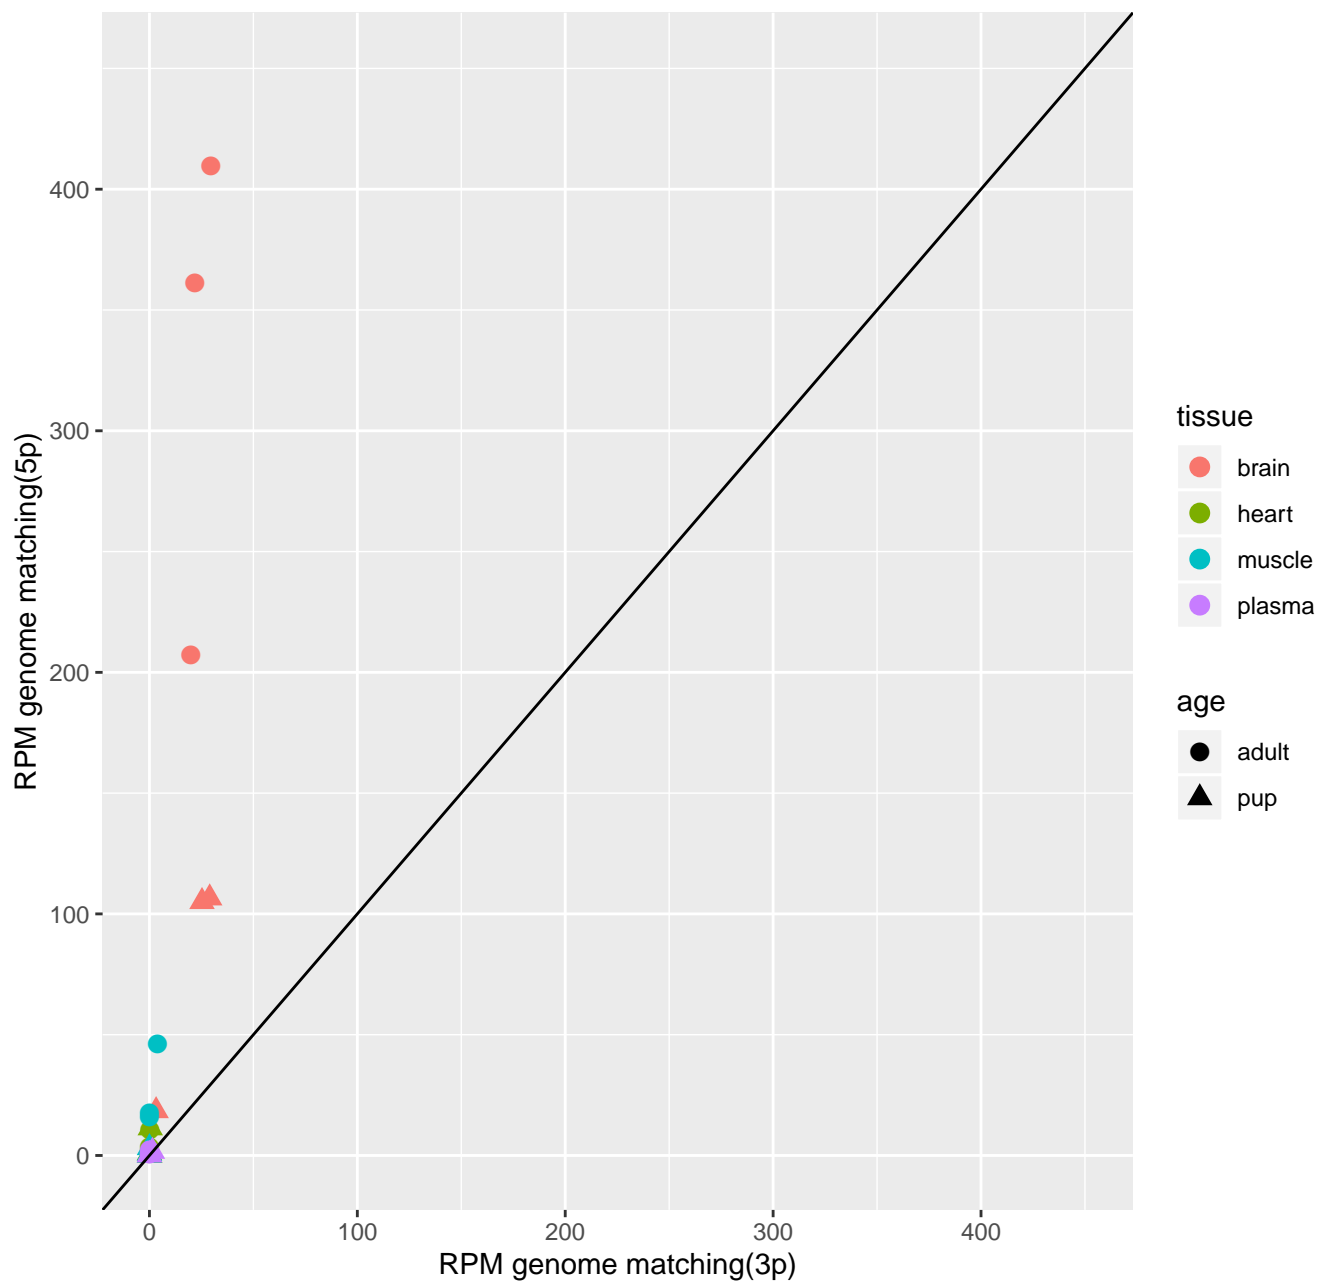

# lwe-miR-3958\_loc1

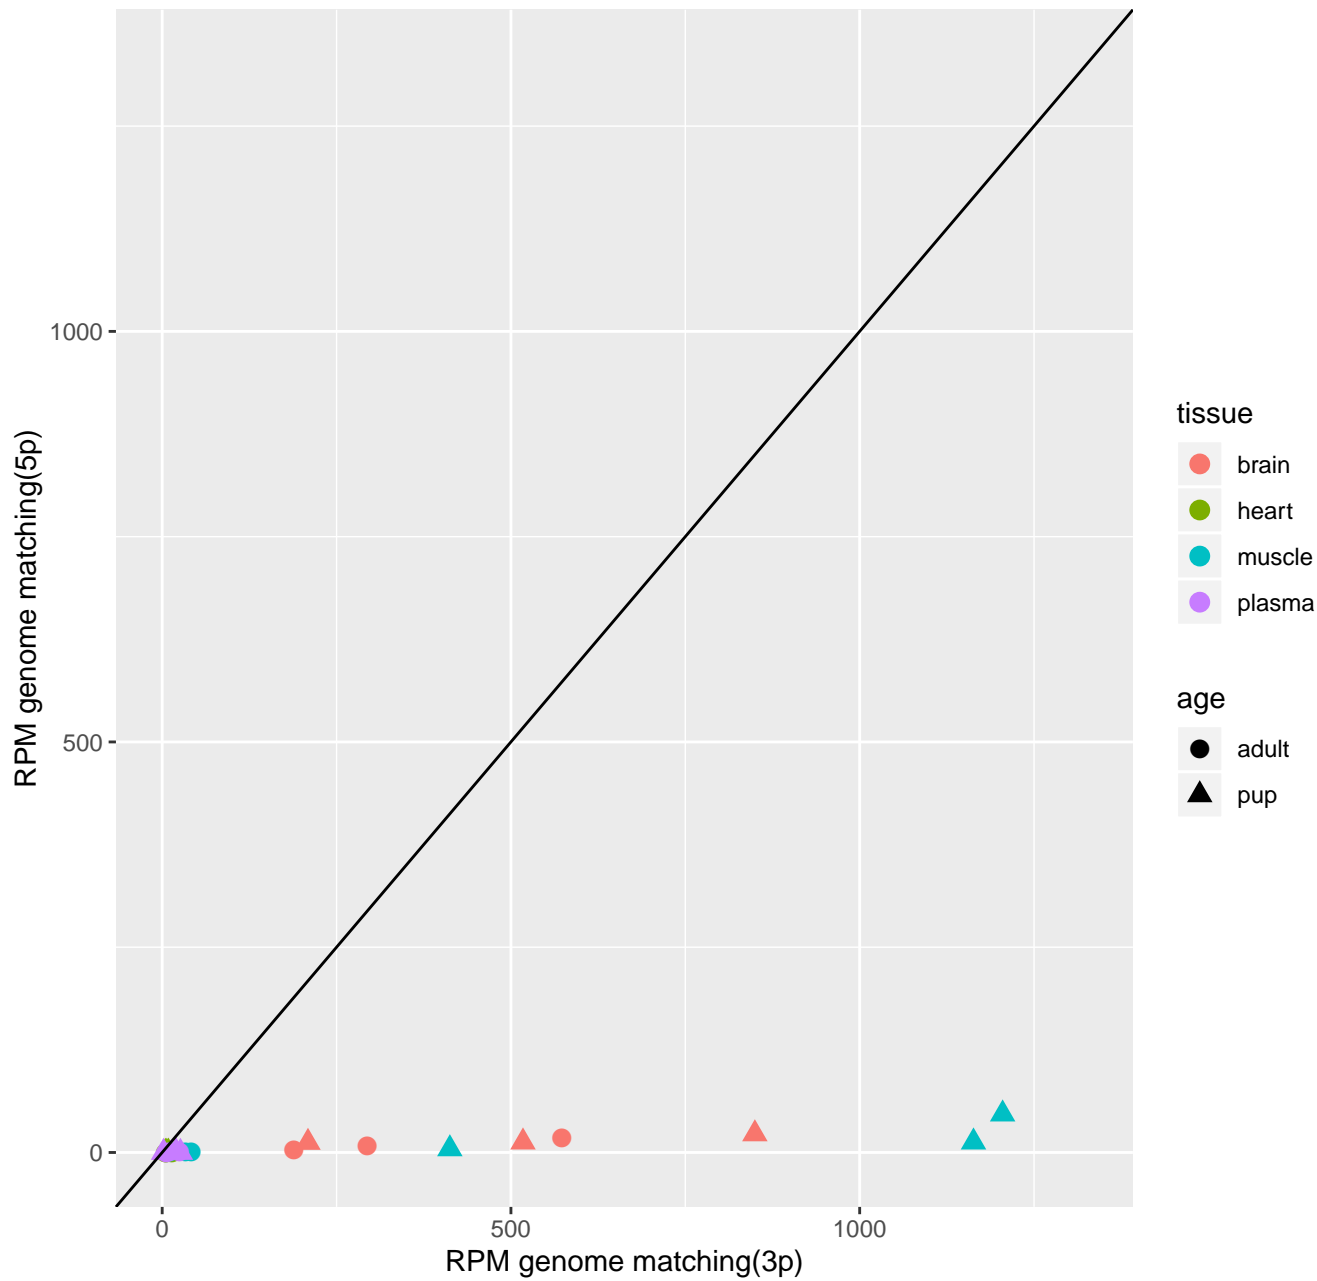

## novel\_125

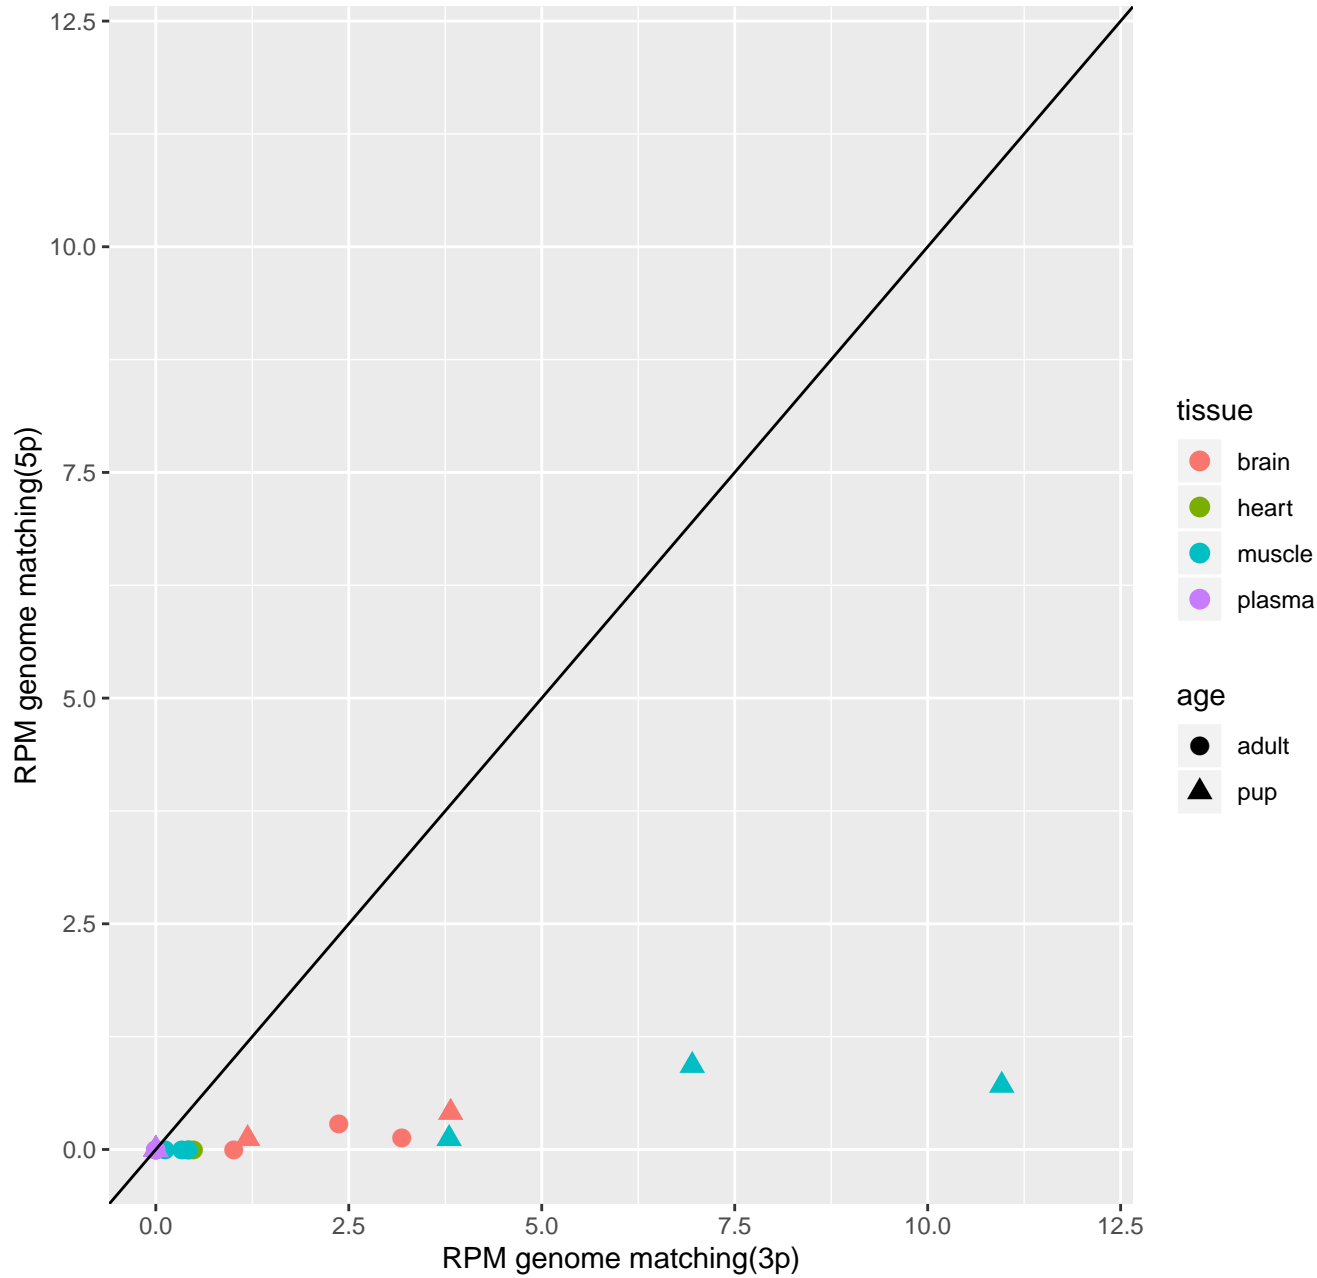

## lwe-miR-495\_loc1

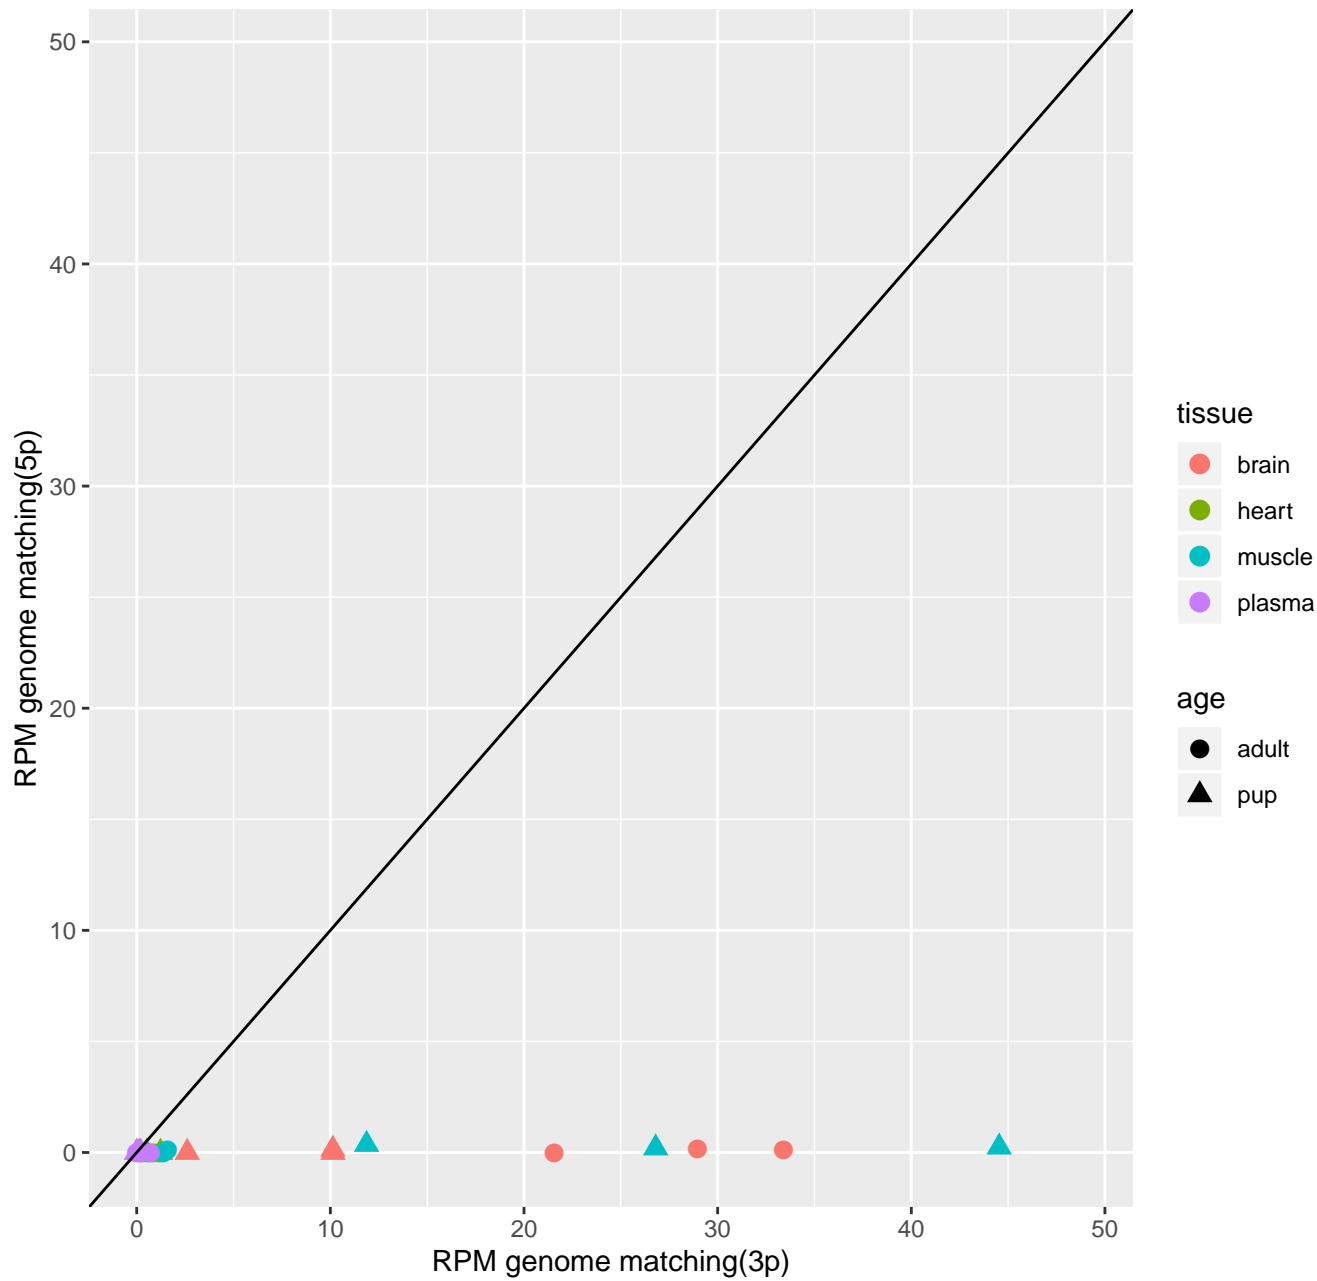



## lwe-miR-494\_loc1

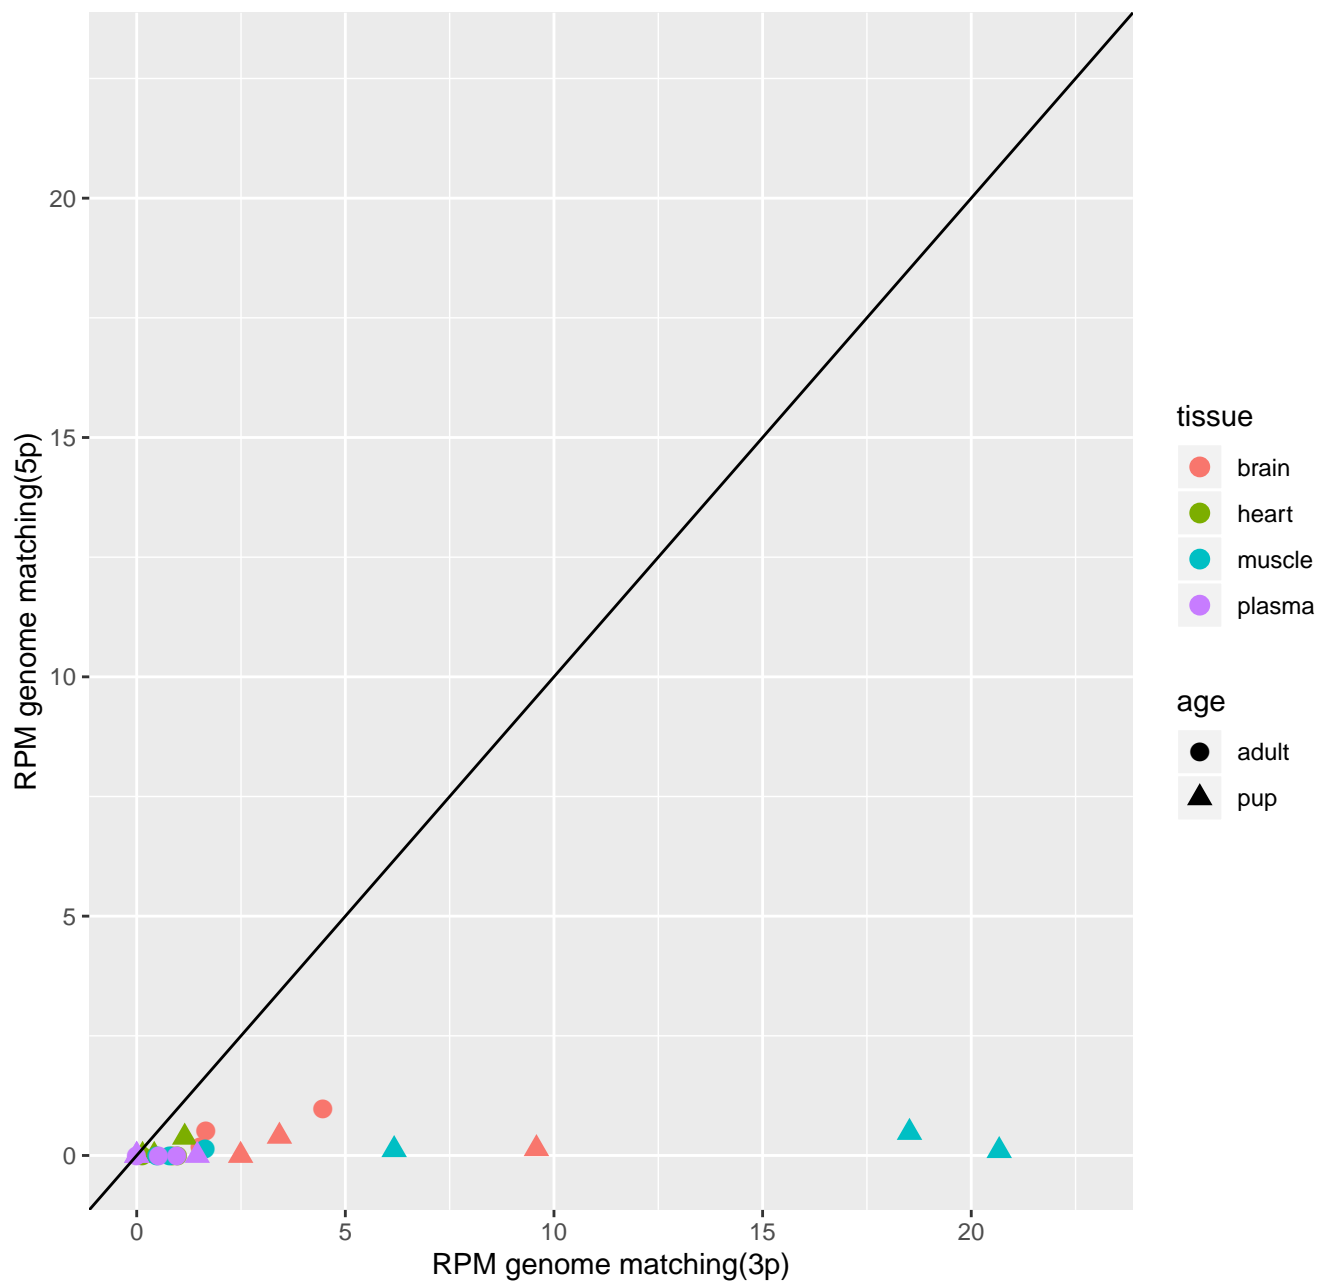

# lwe-miR-329\_loc1

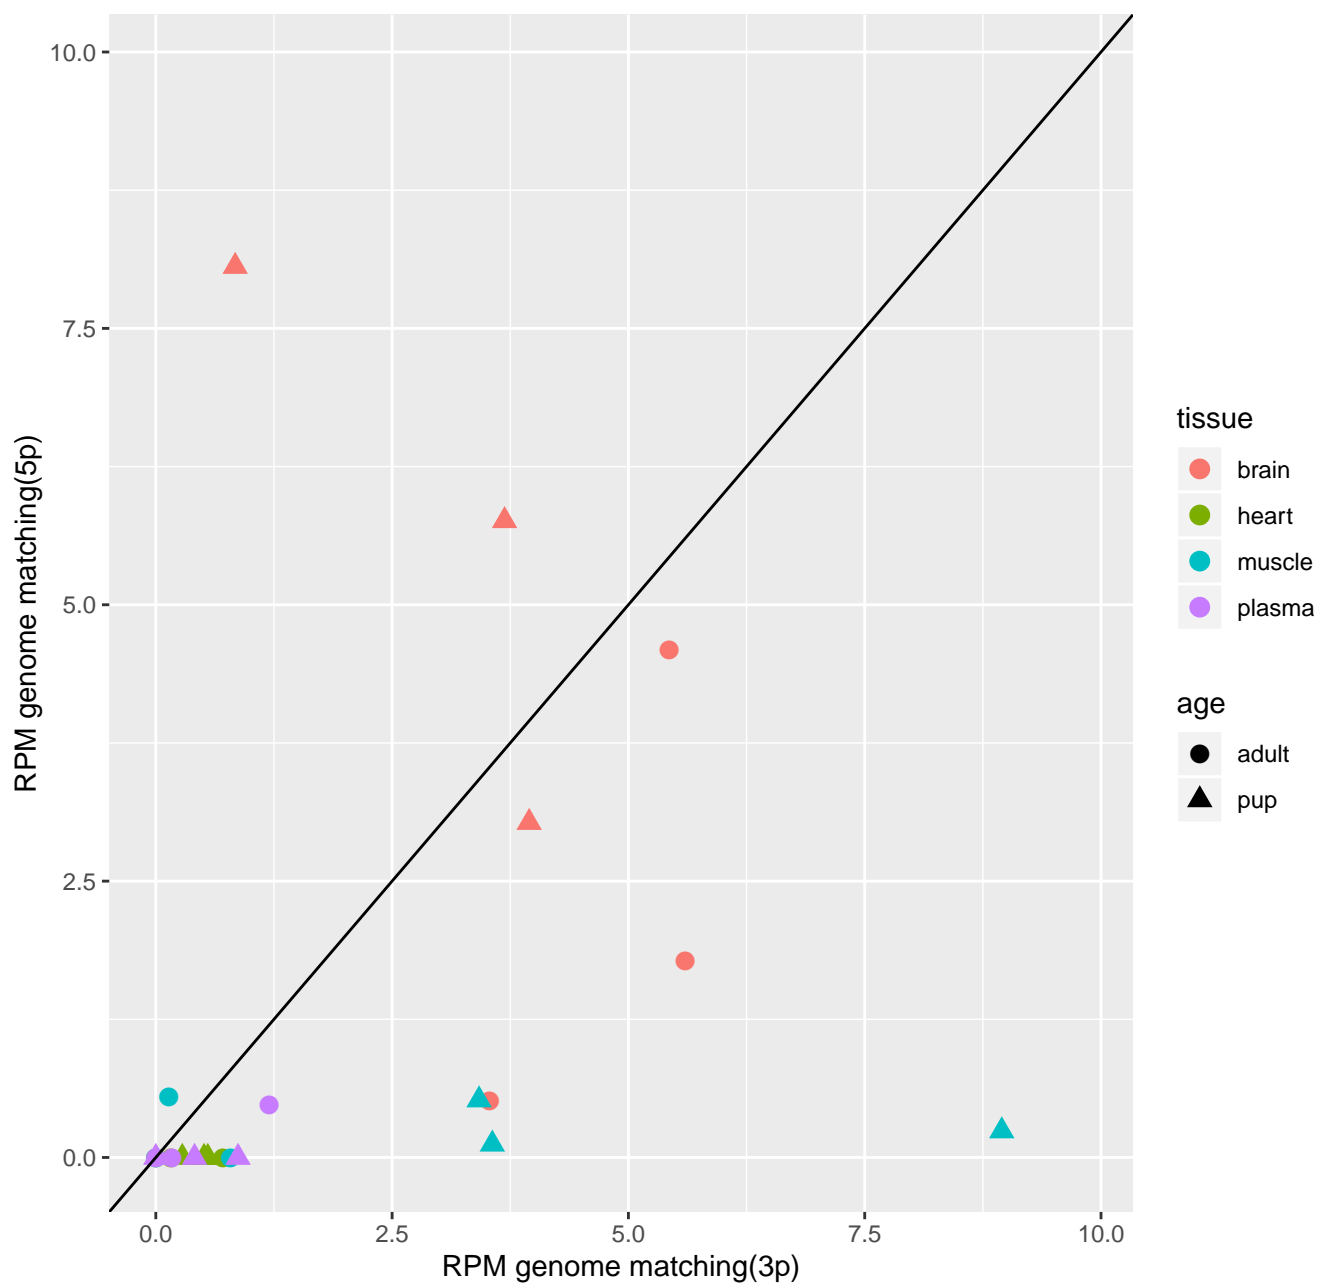

# lwe-miR-758\_loc1

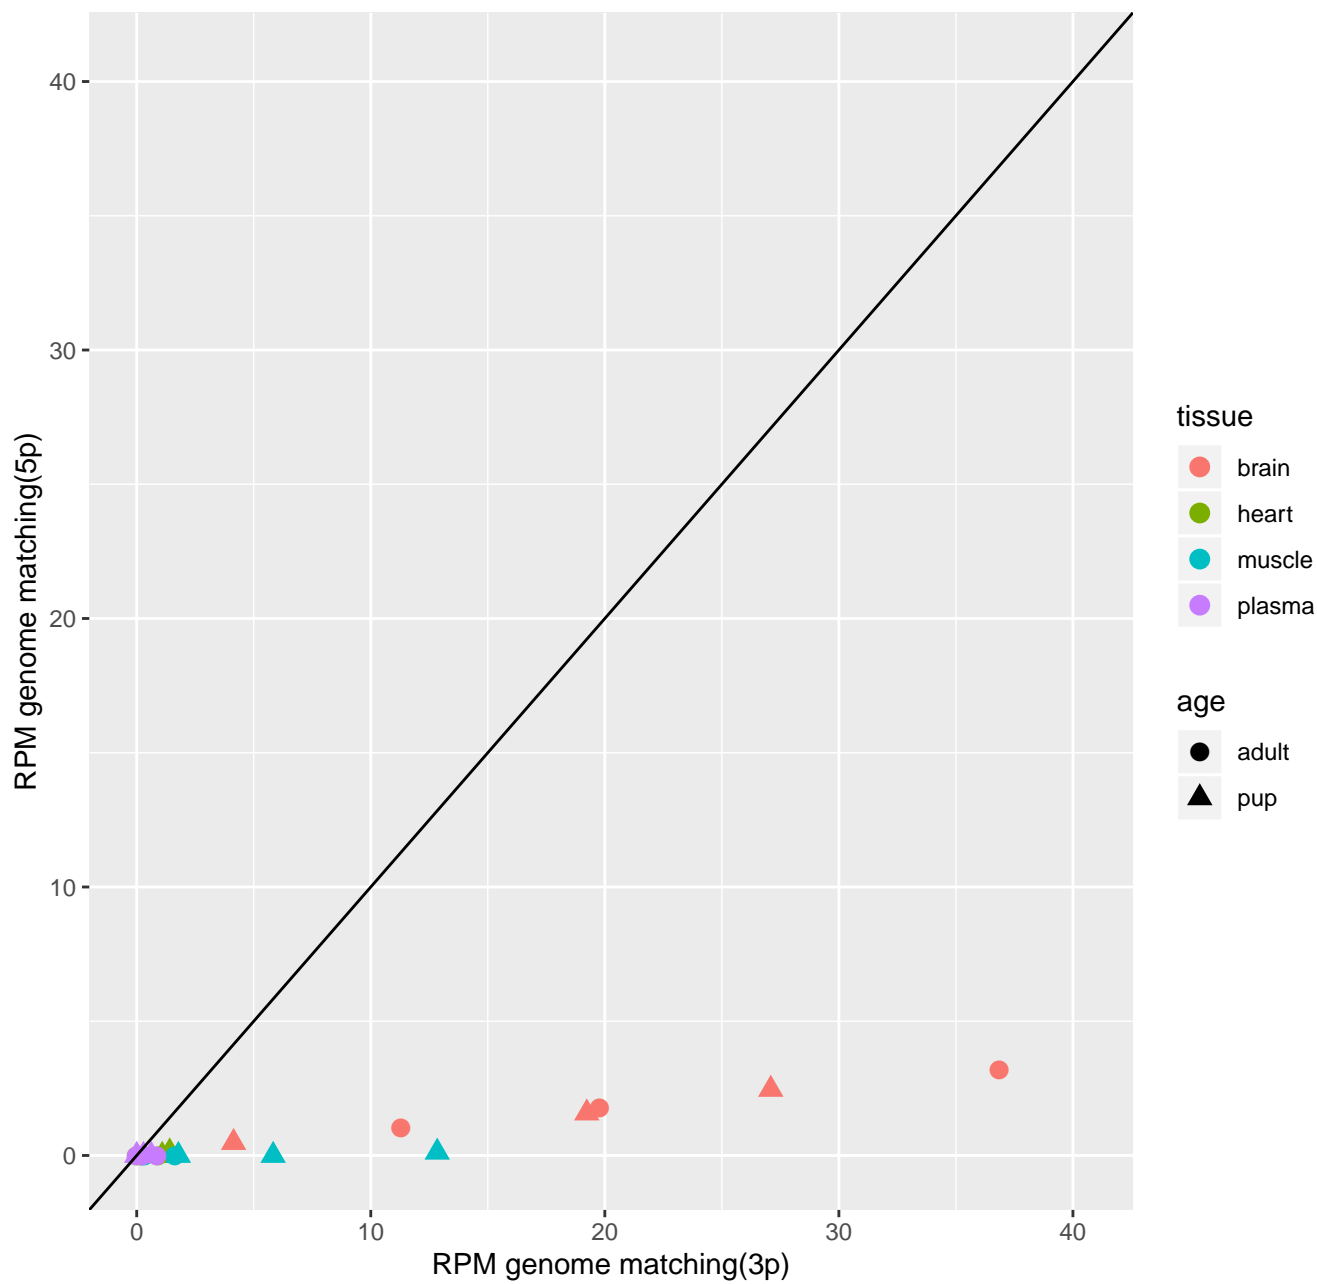

# lwe-miR-323\_loc1

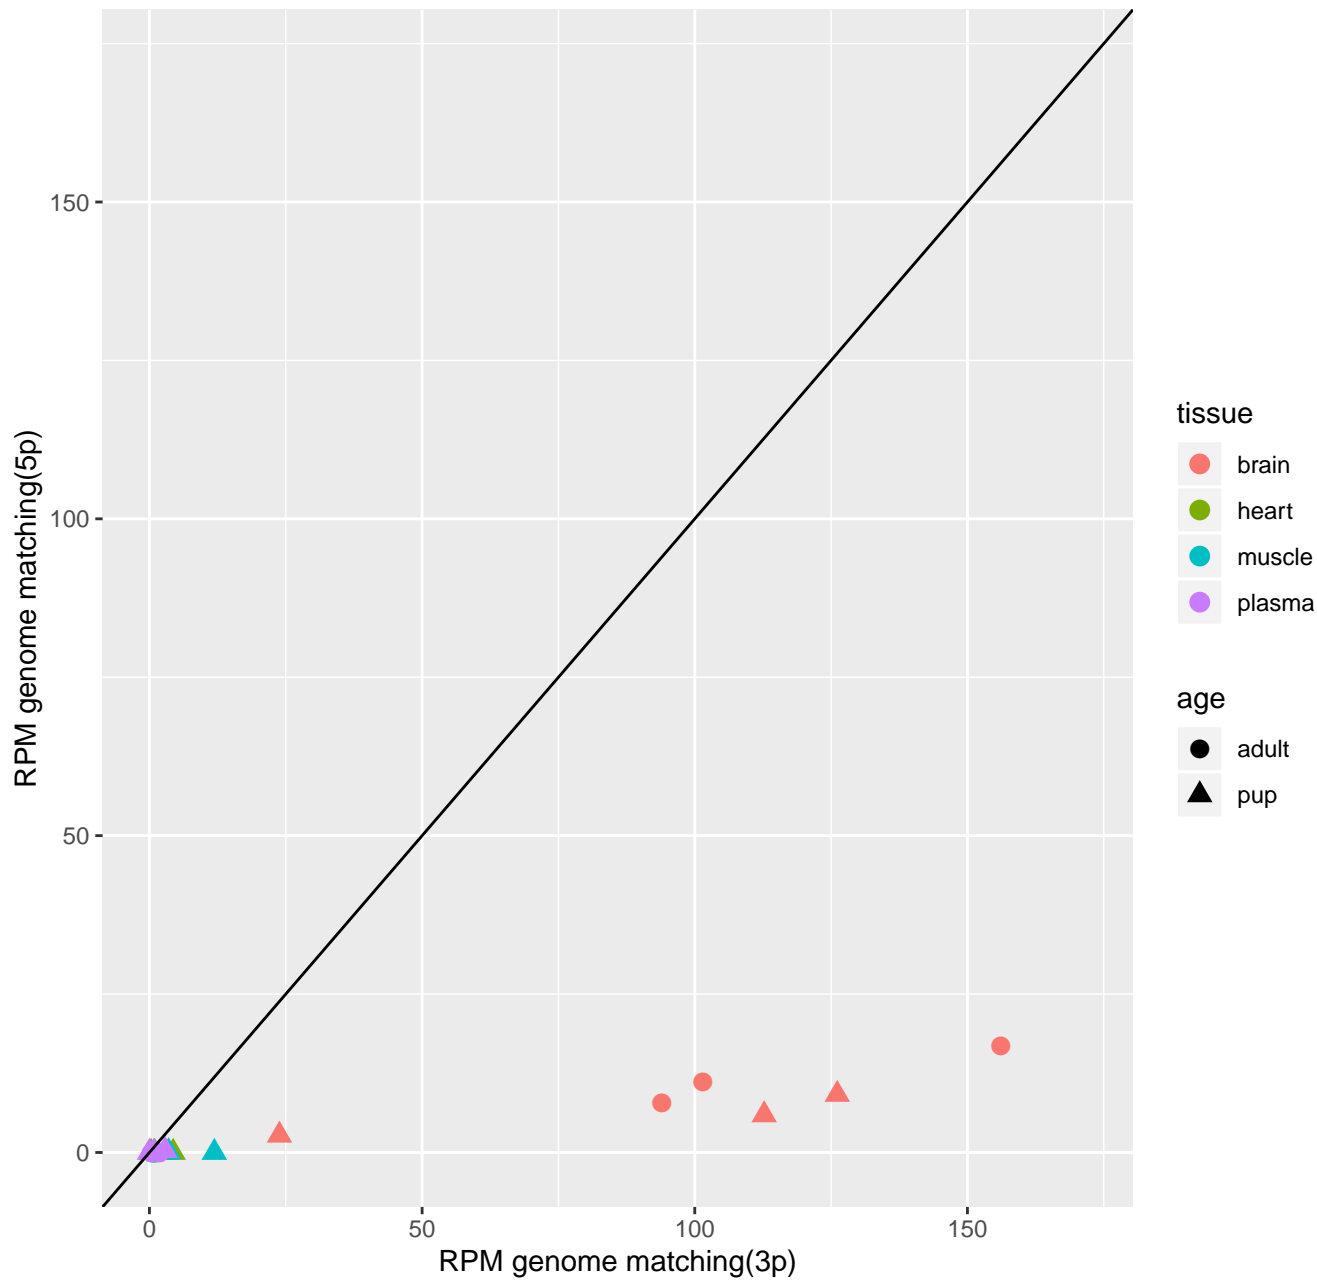

## lwe-miR-380\_loc1

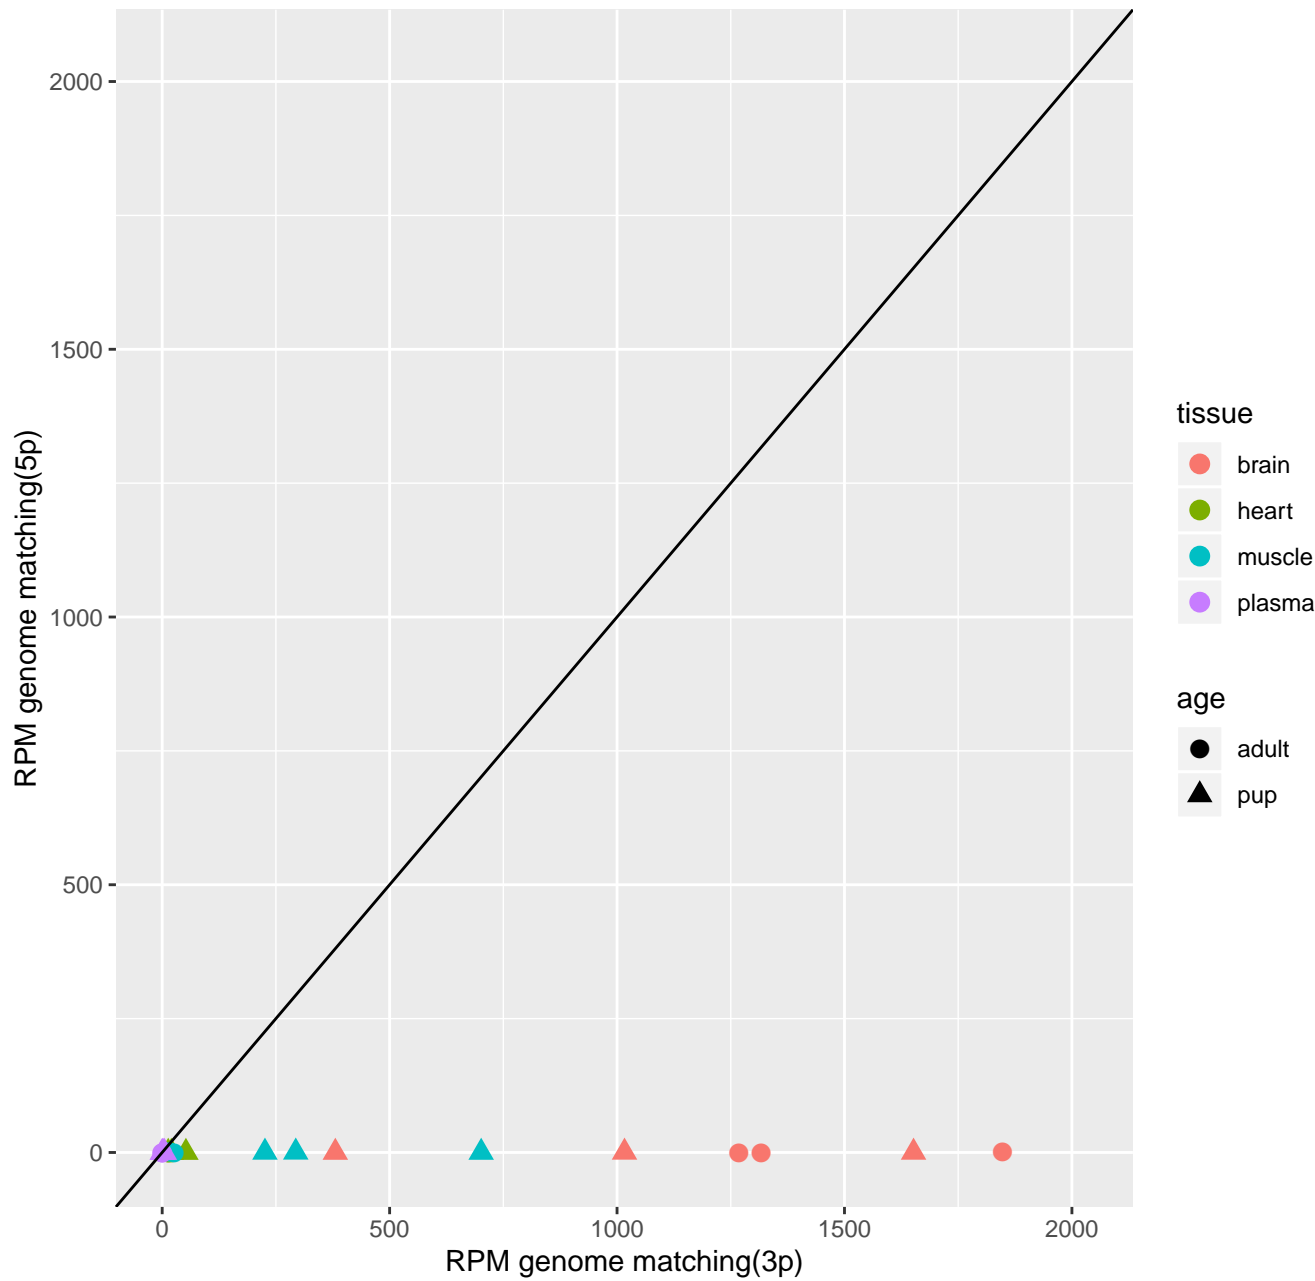

## lwe-miR-299a\_loc1

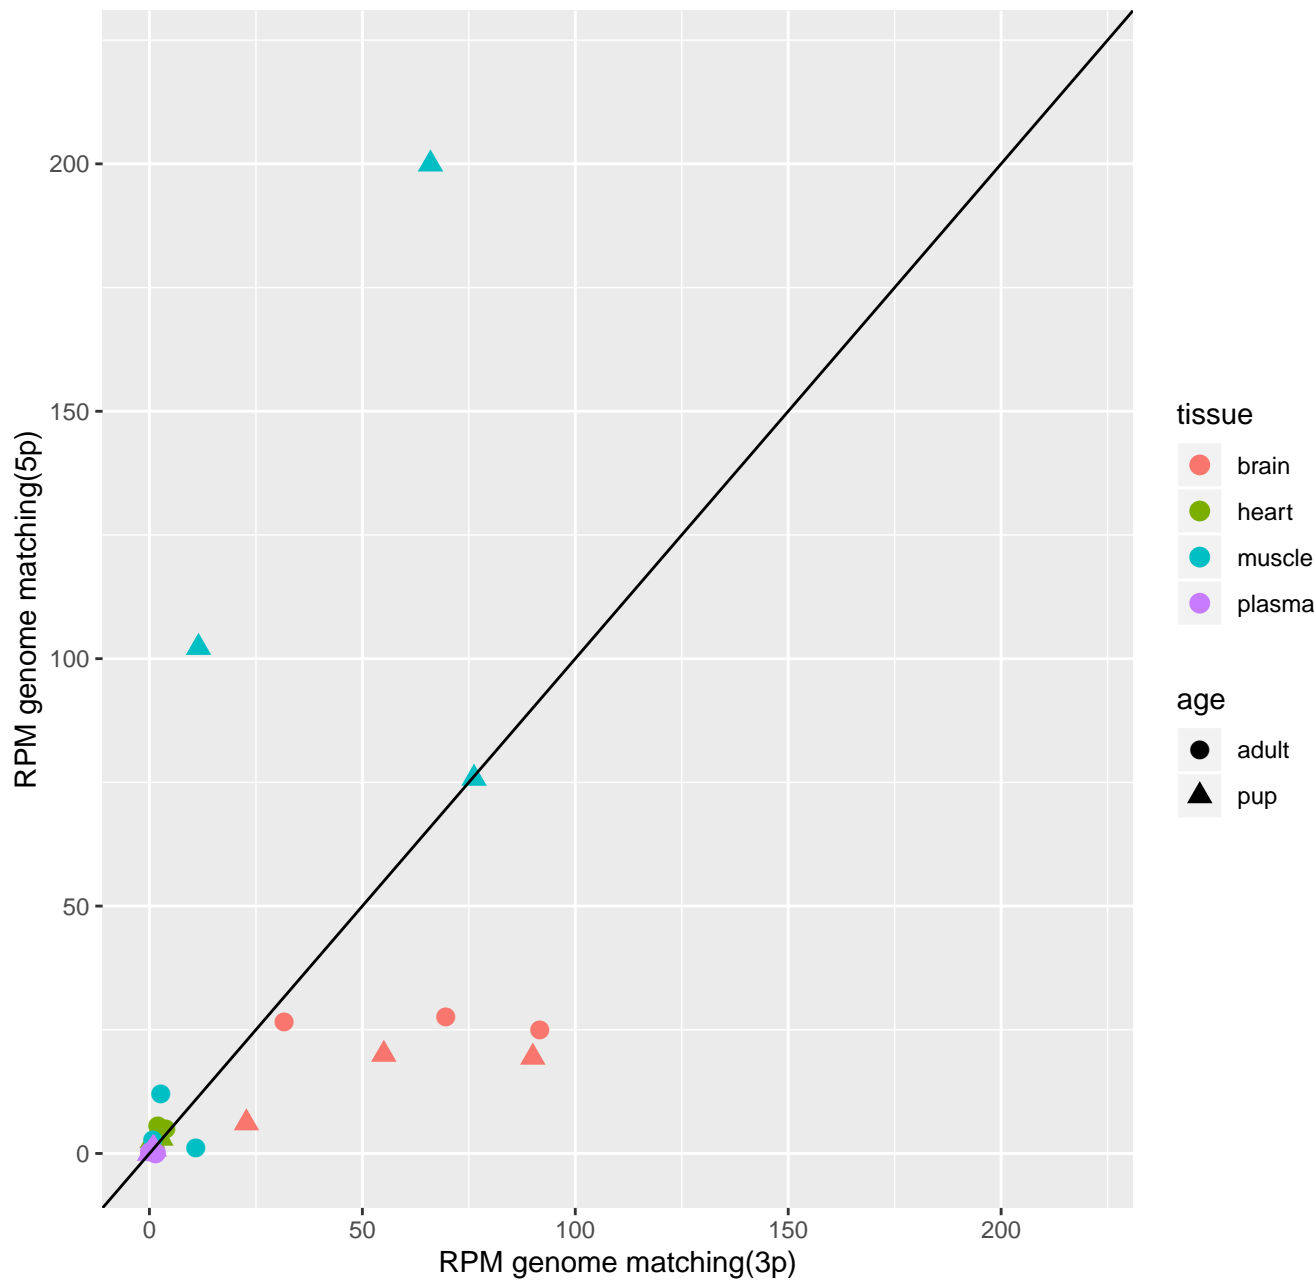

# lwe-miR-411\_loc1

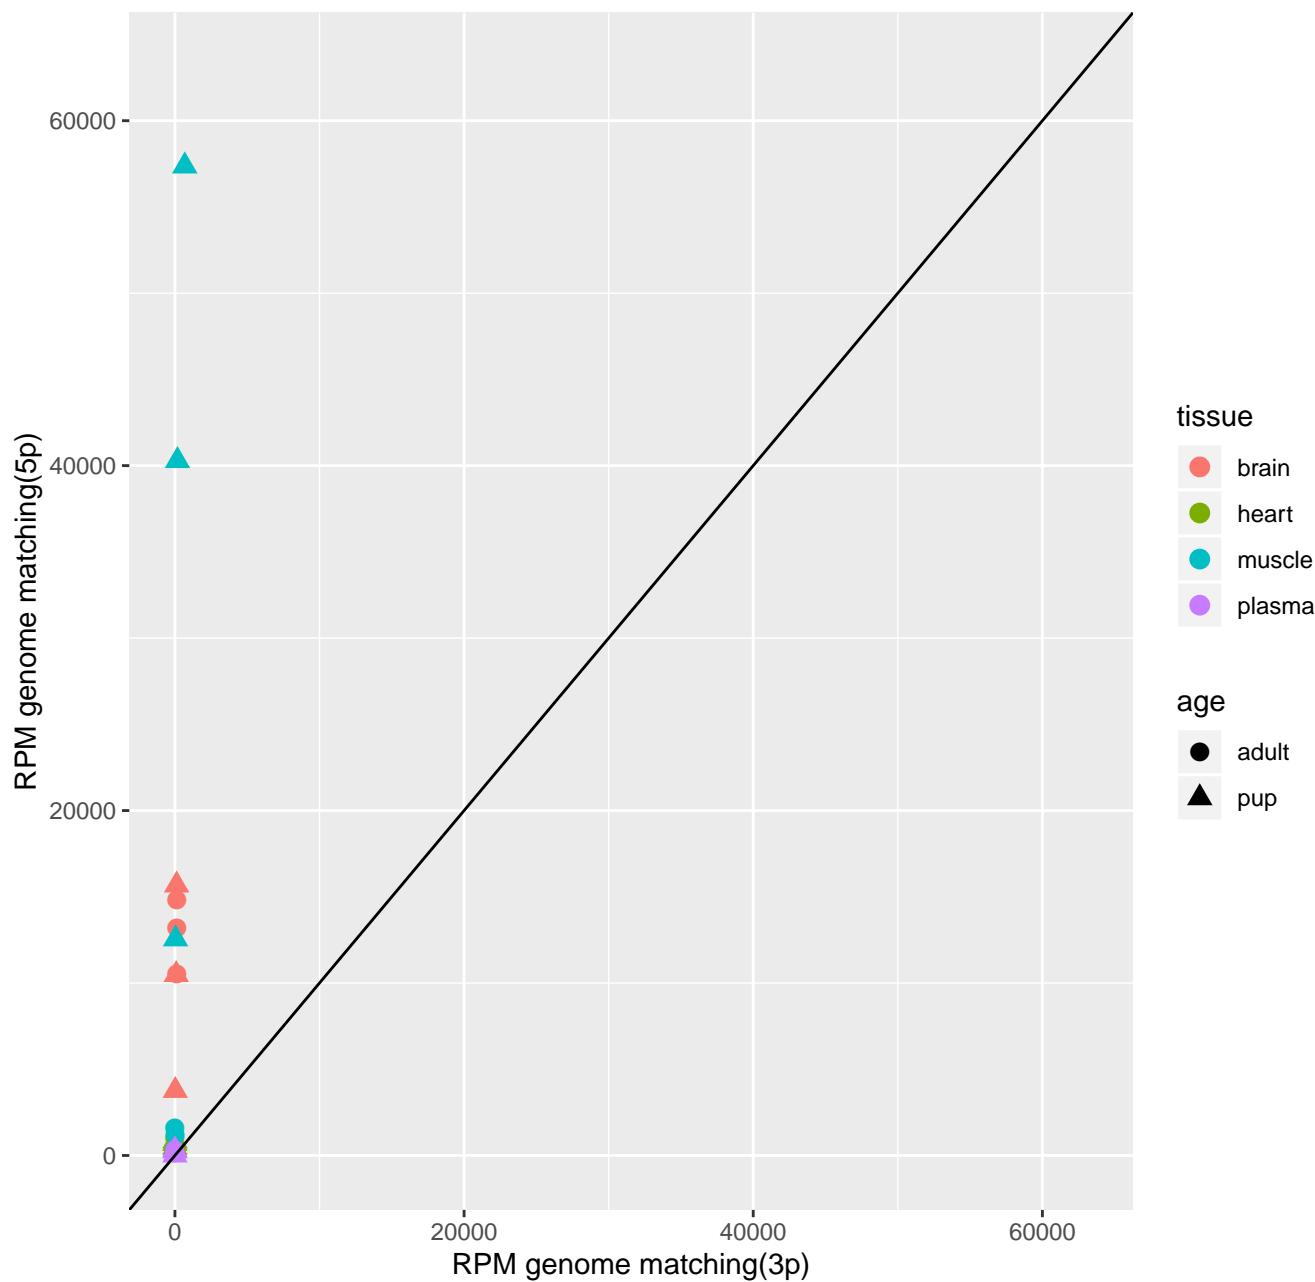

## lwe-miR-379\_loc1

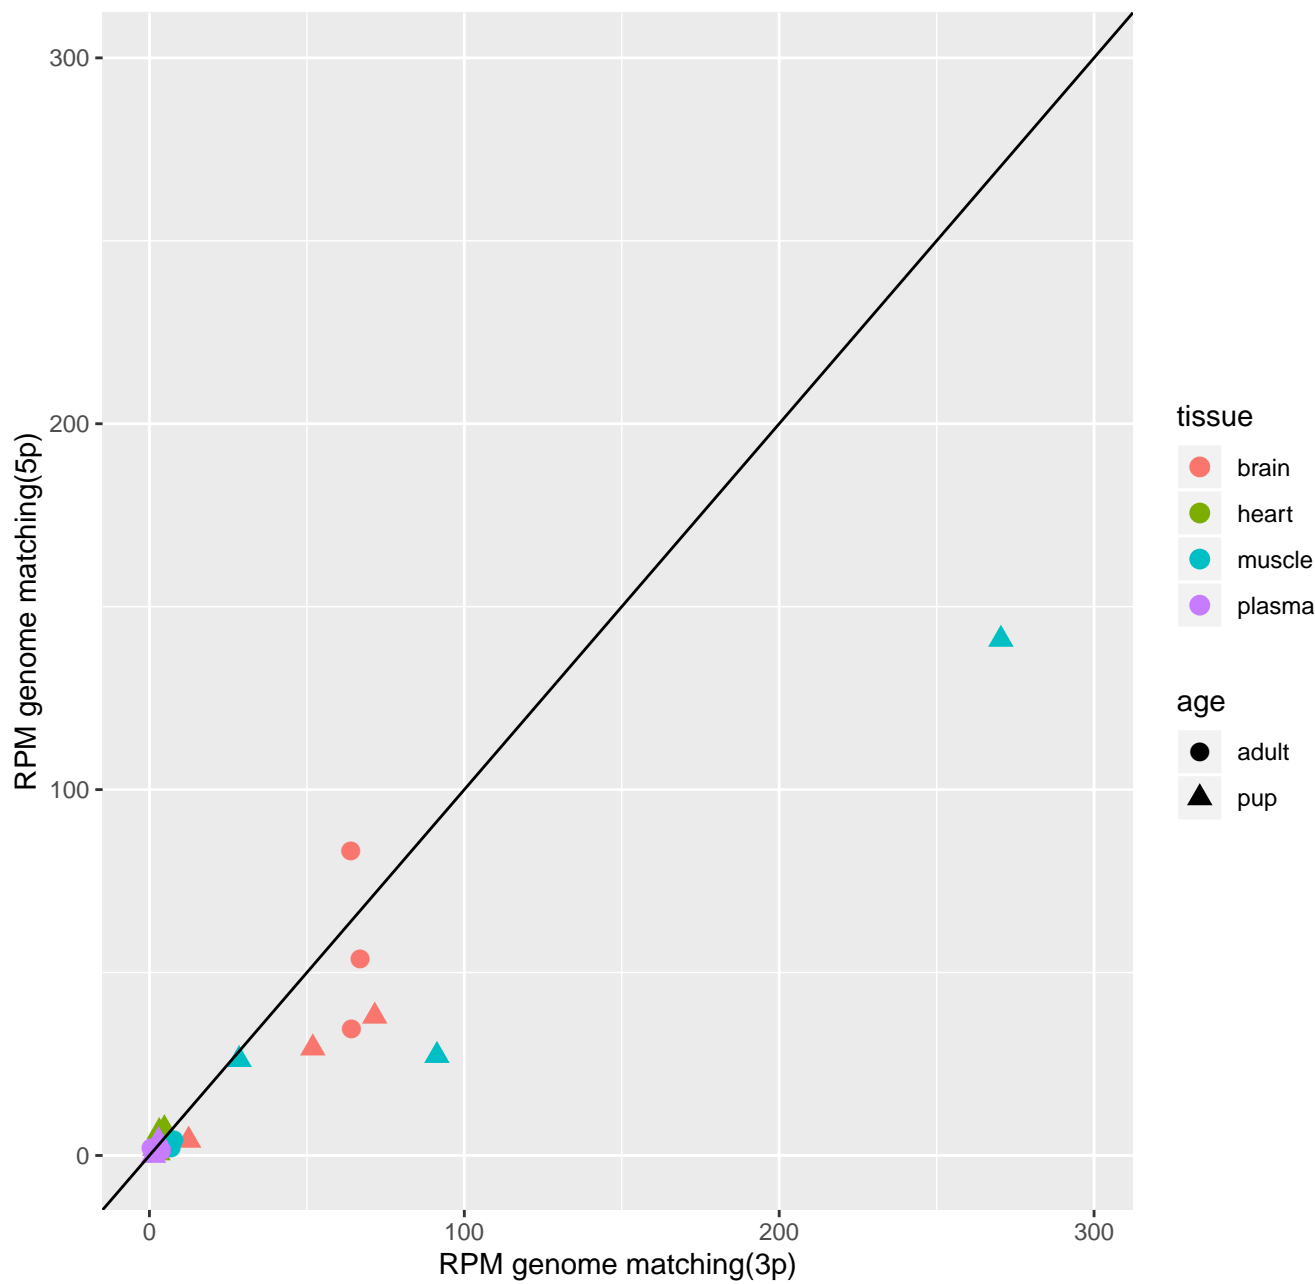



## novel\_126

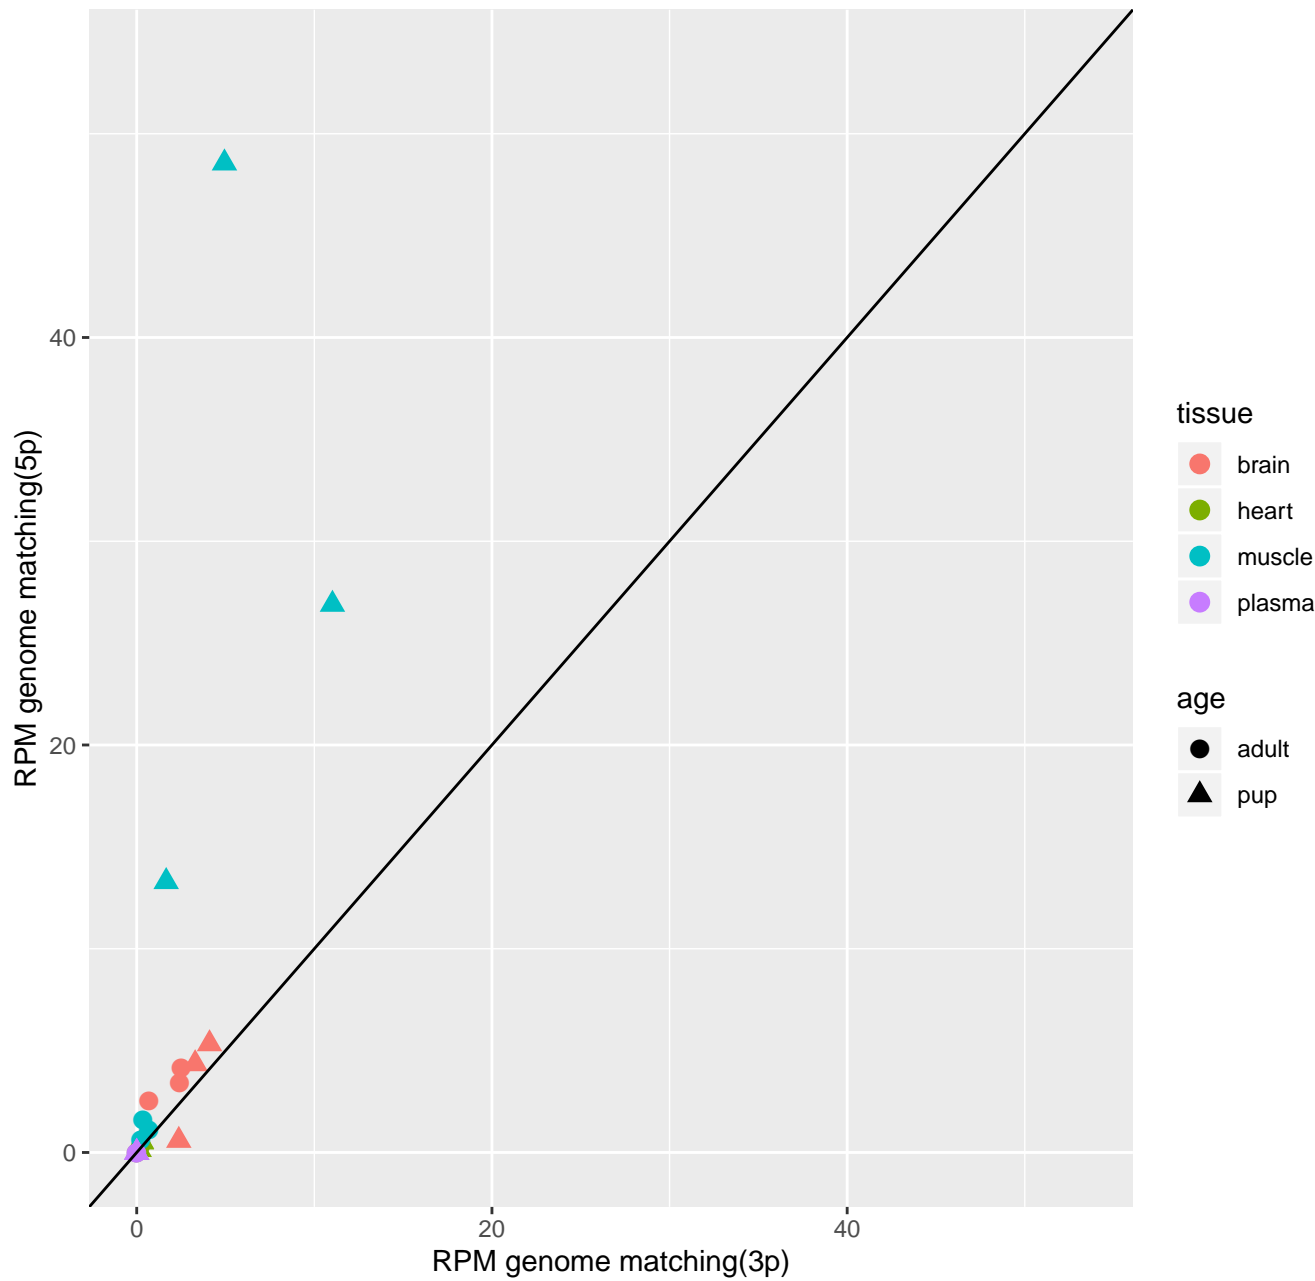

# lve-miR-656\_loc1

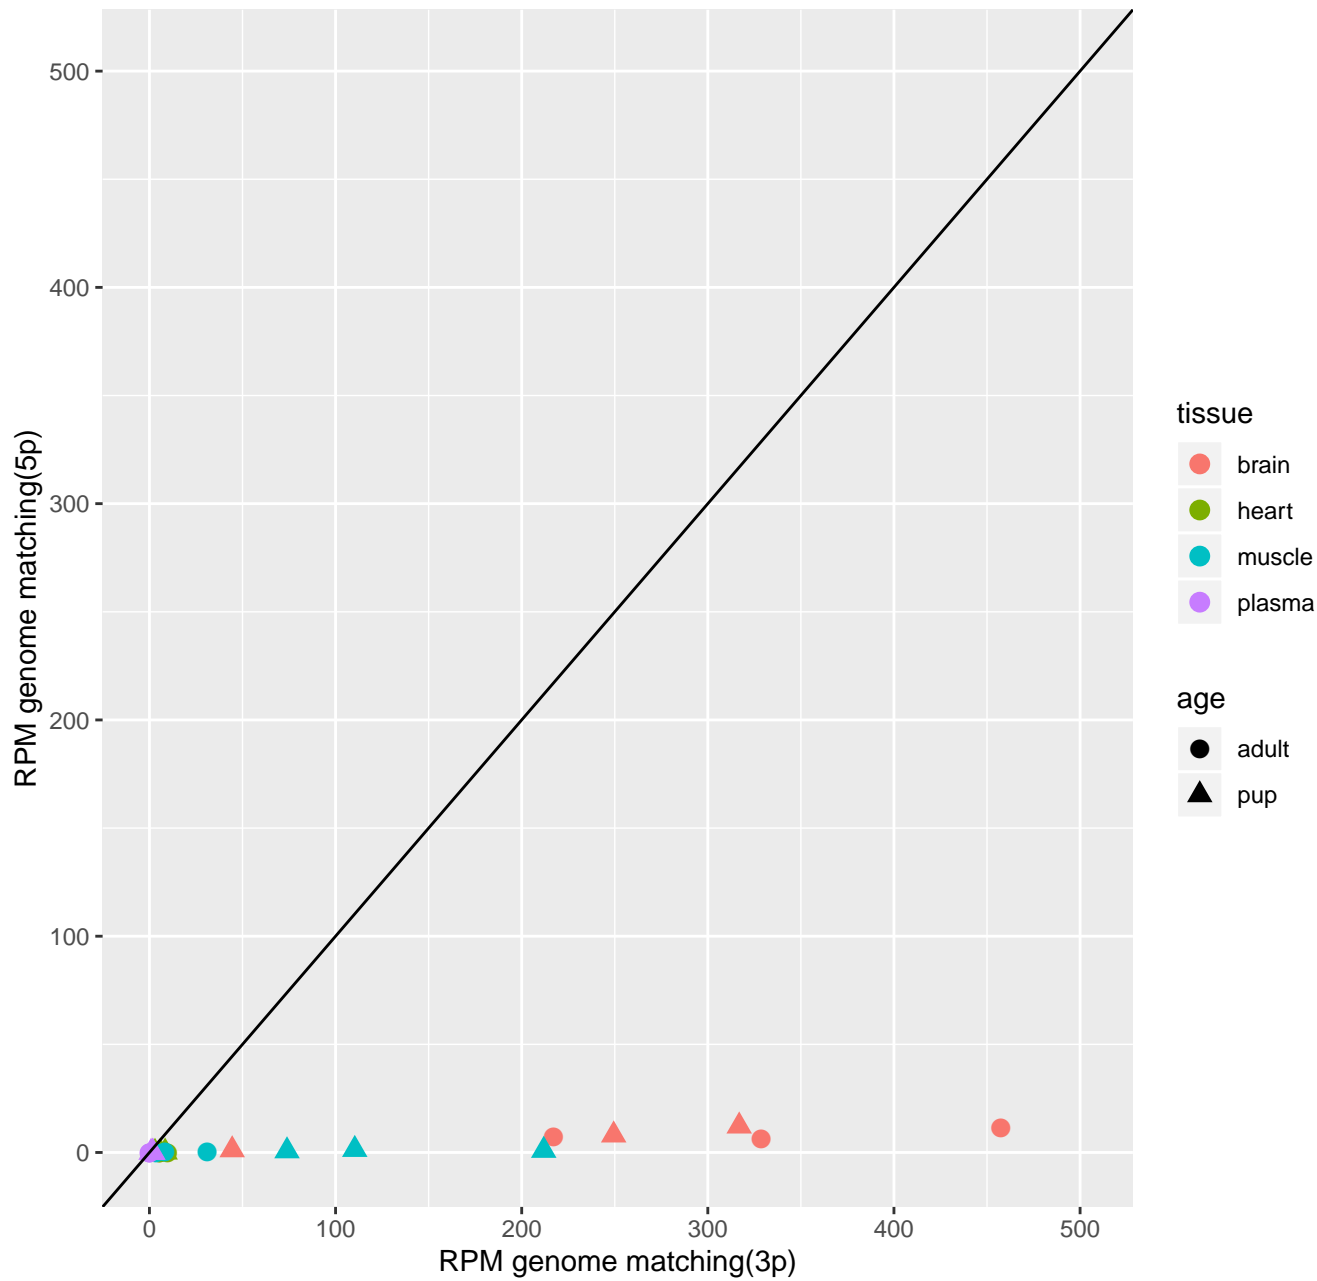

# lwe-miR-410\_loc1

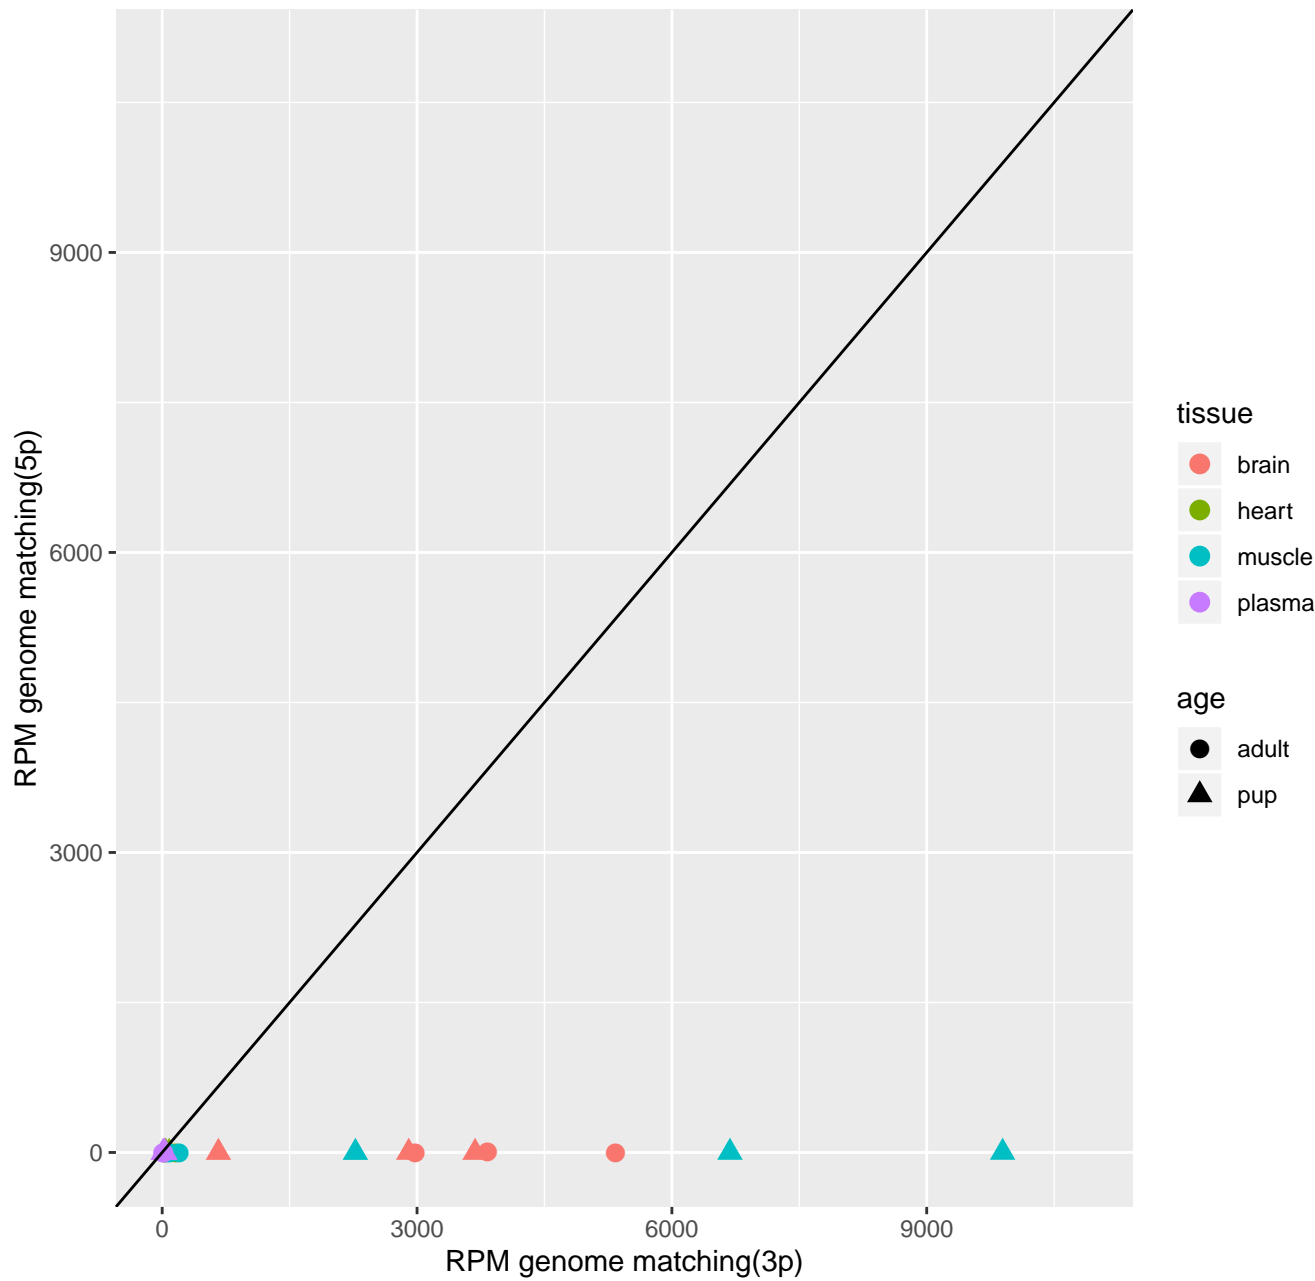

# lwe-miR-369\_loc1

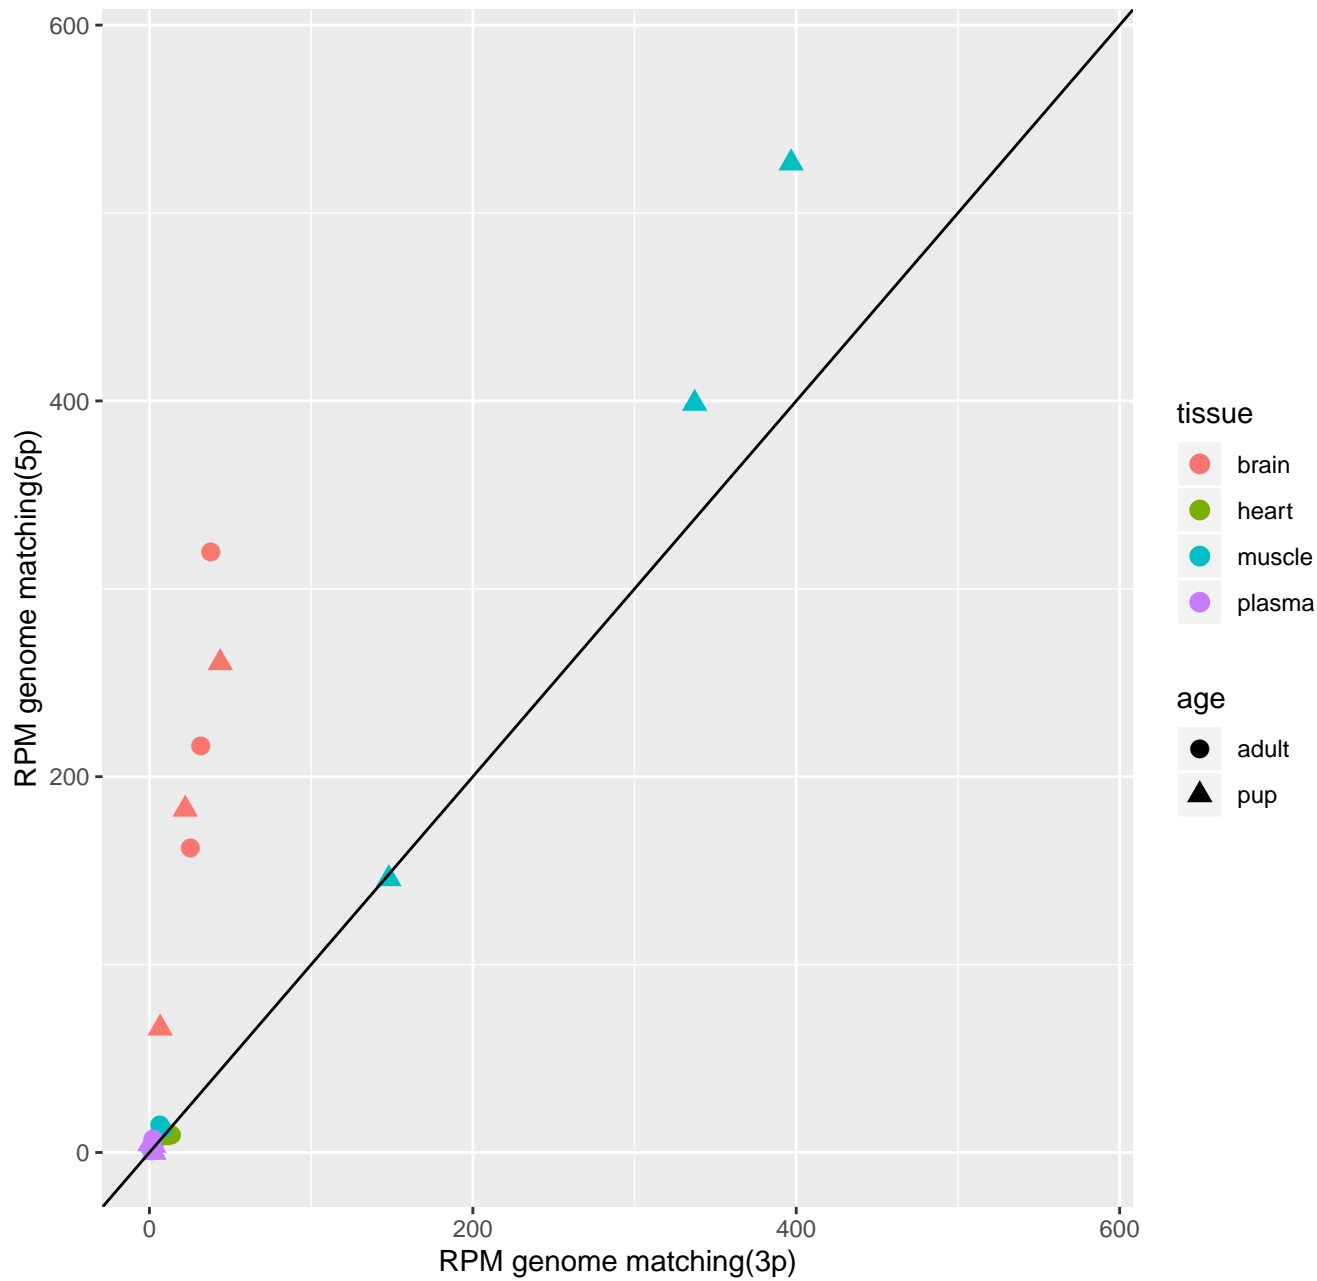

# lwe-miR-412\_loc1

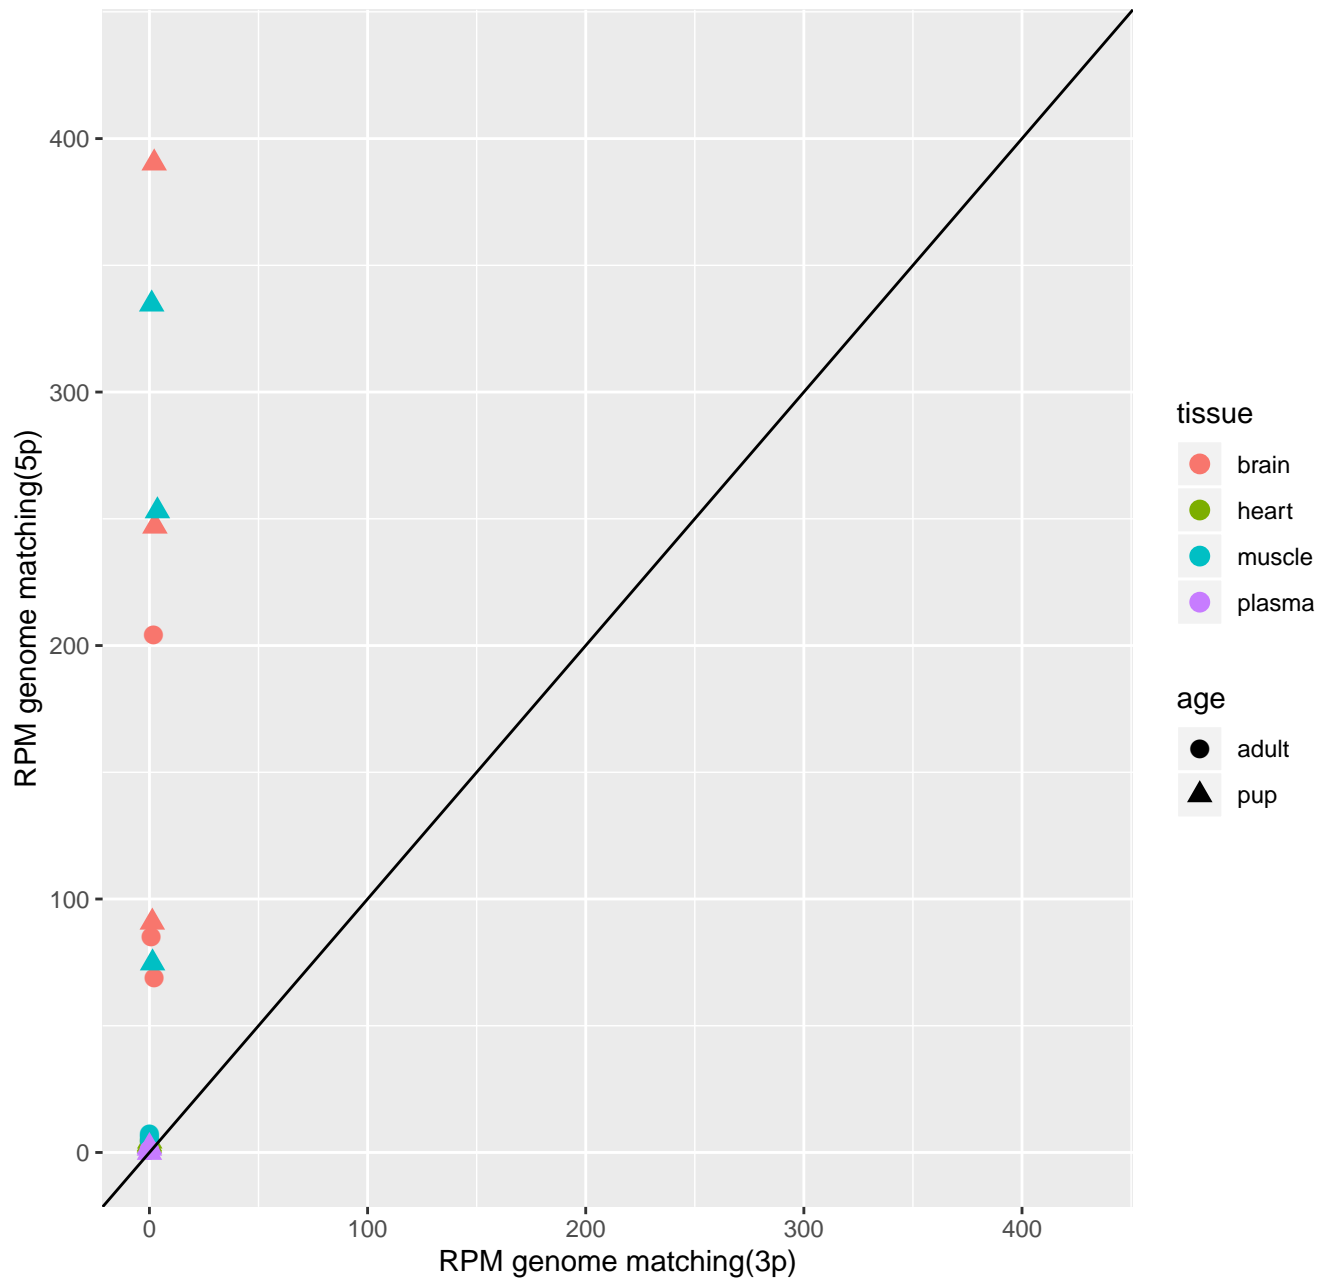

# lwe-miR-409a\_loc1

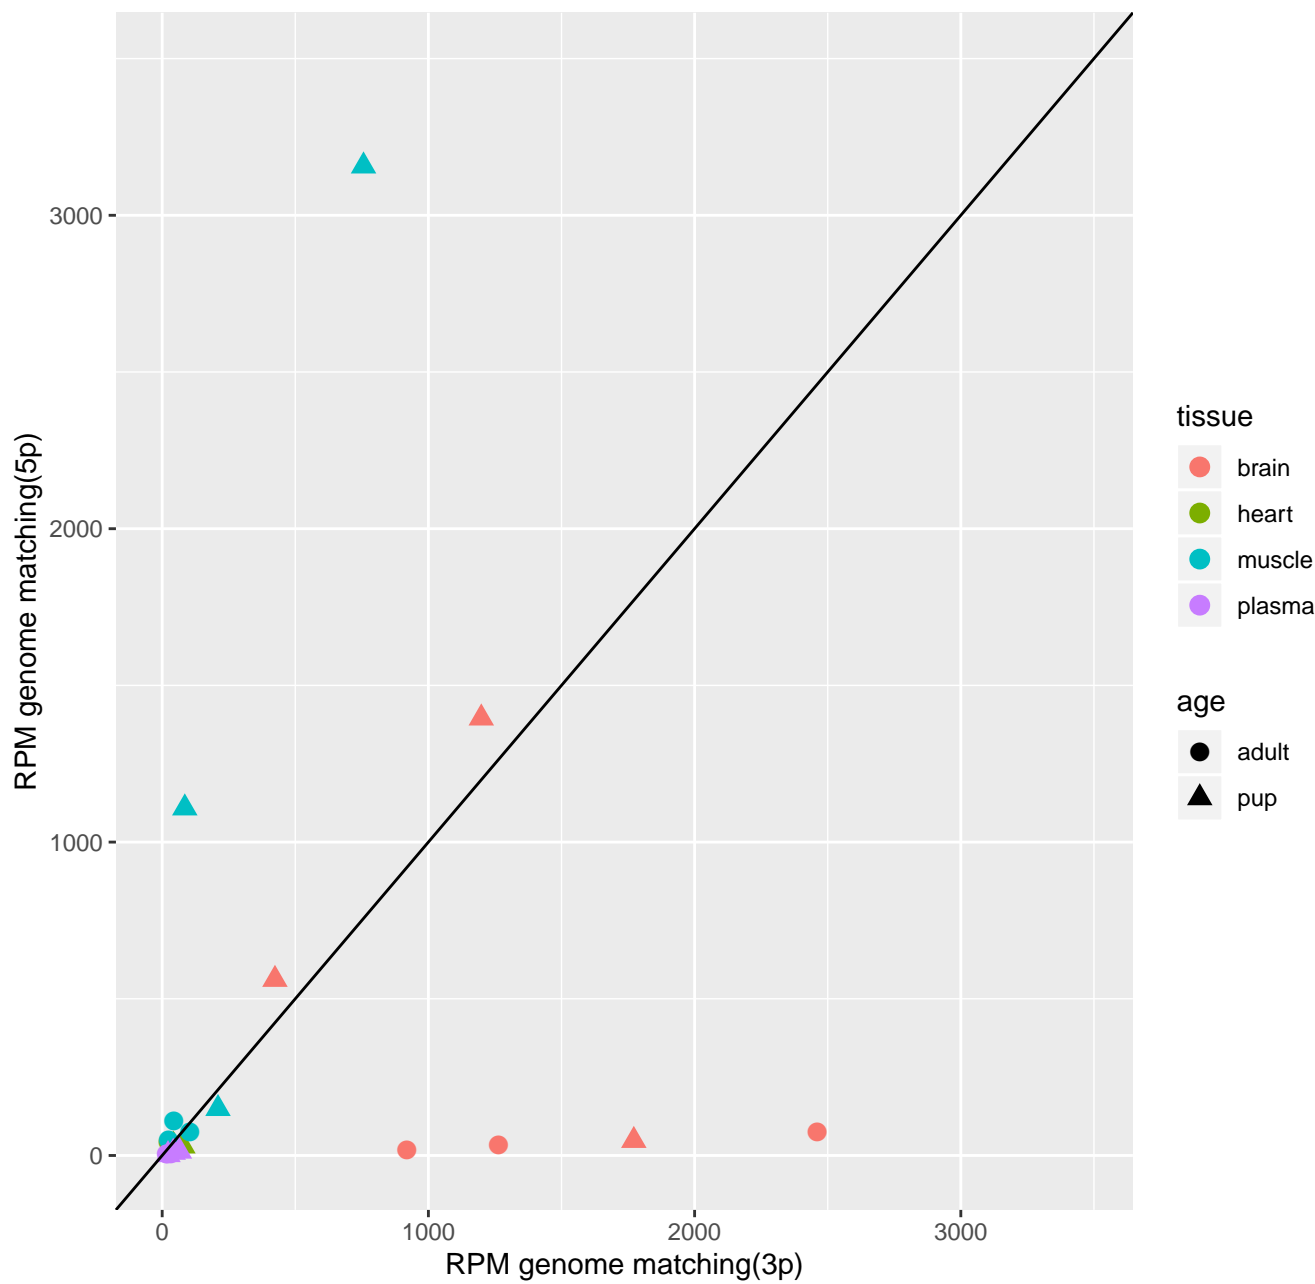

## lwe-miR-377\_loc1

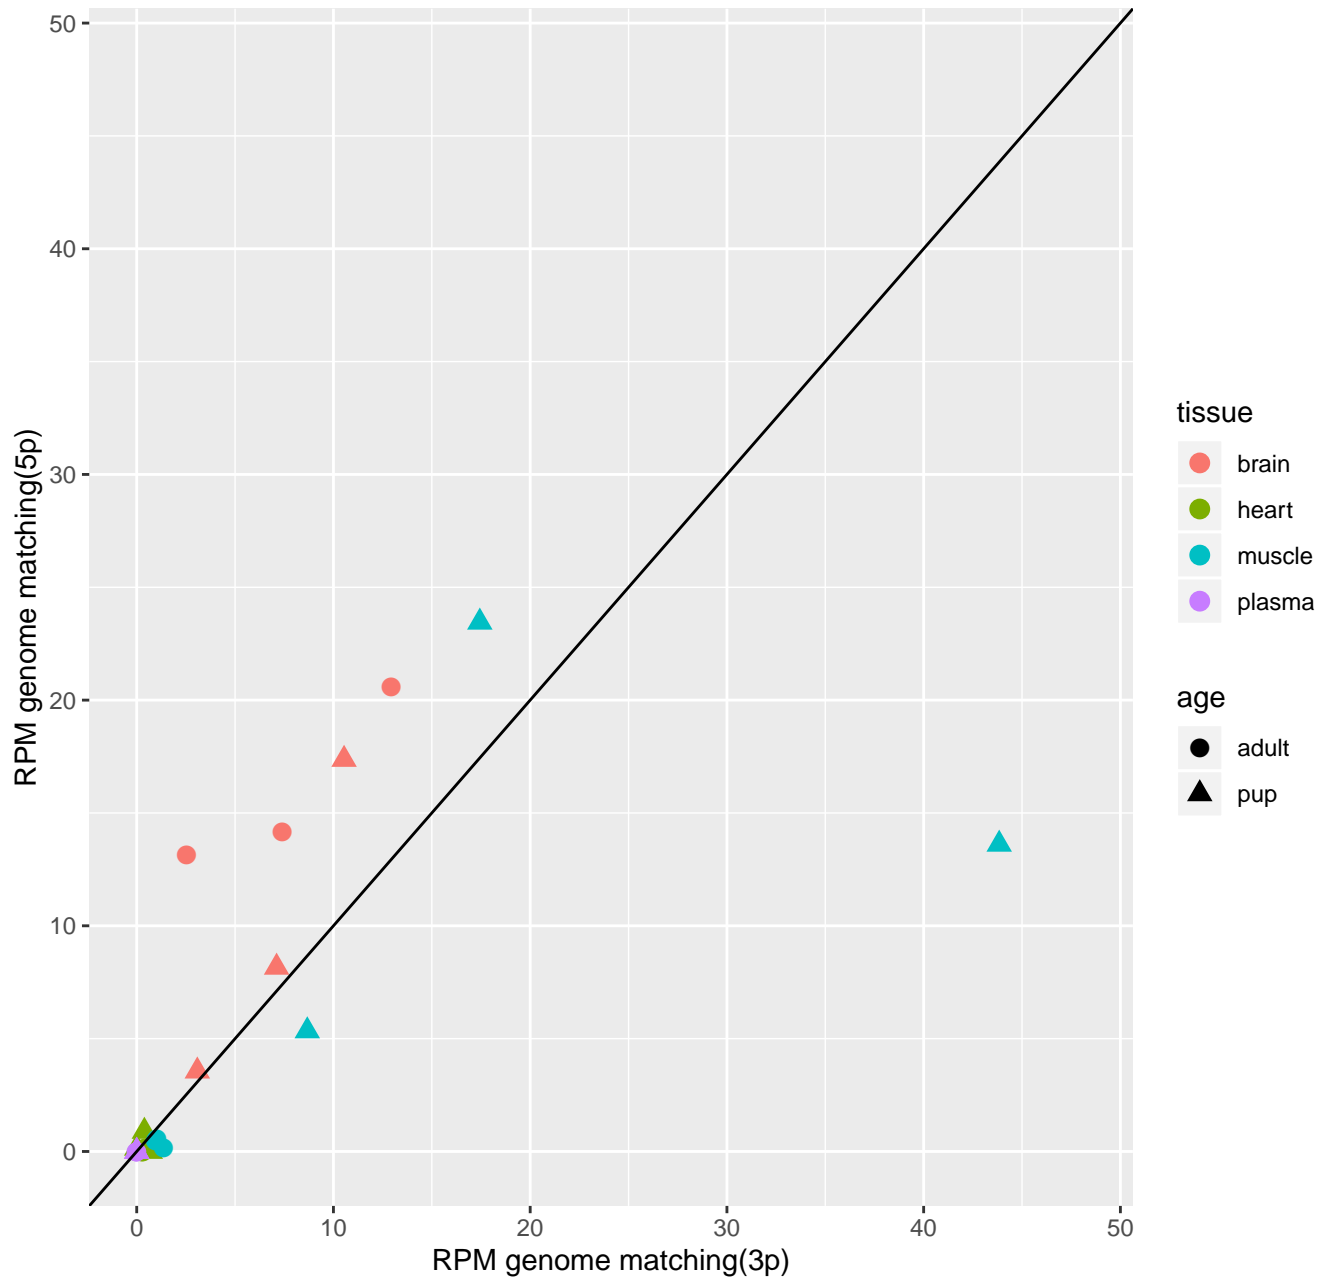

# lwe-miR-496\_loc1

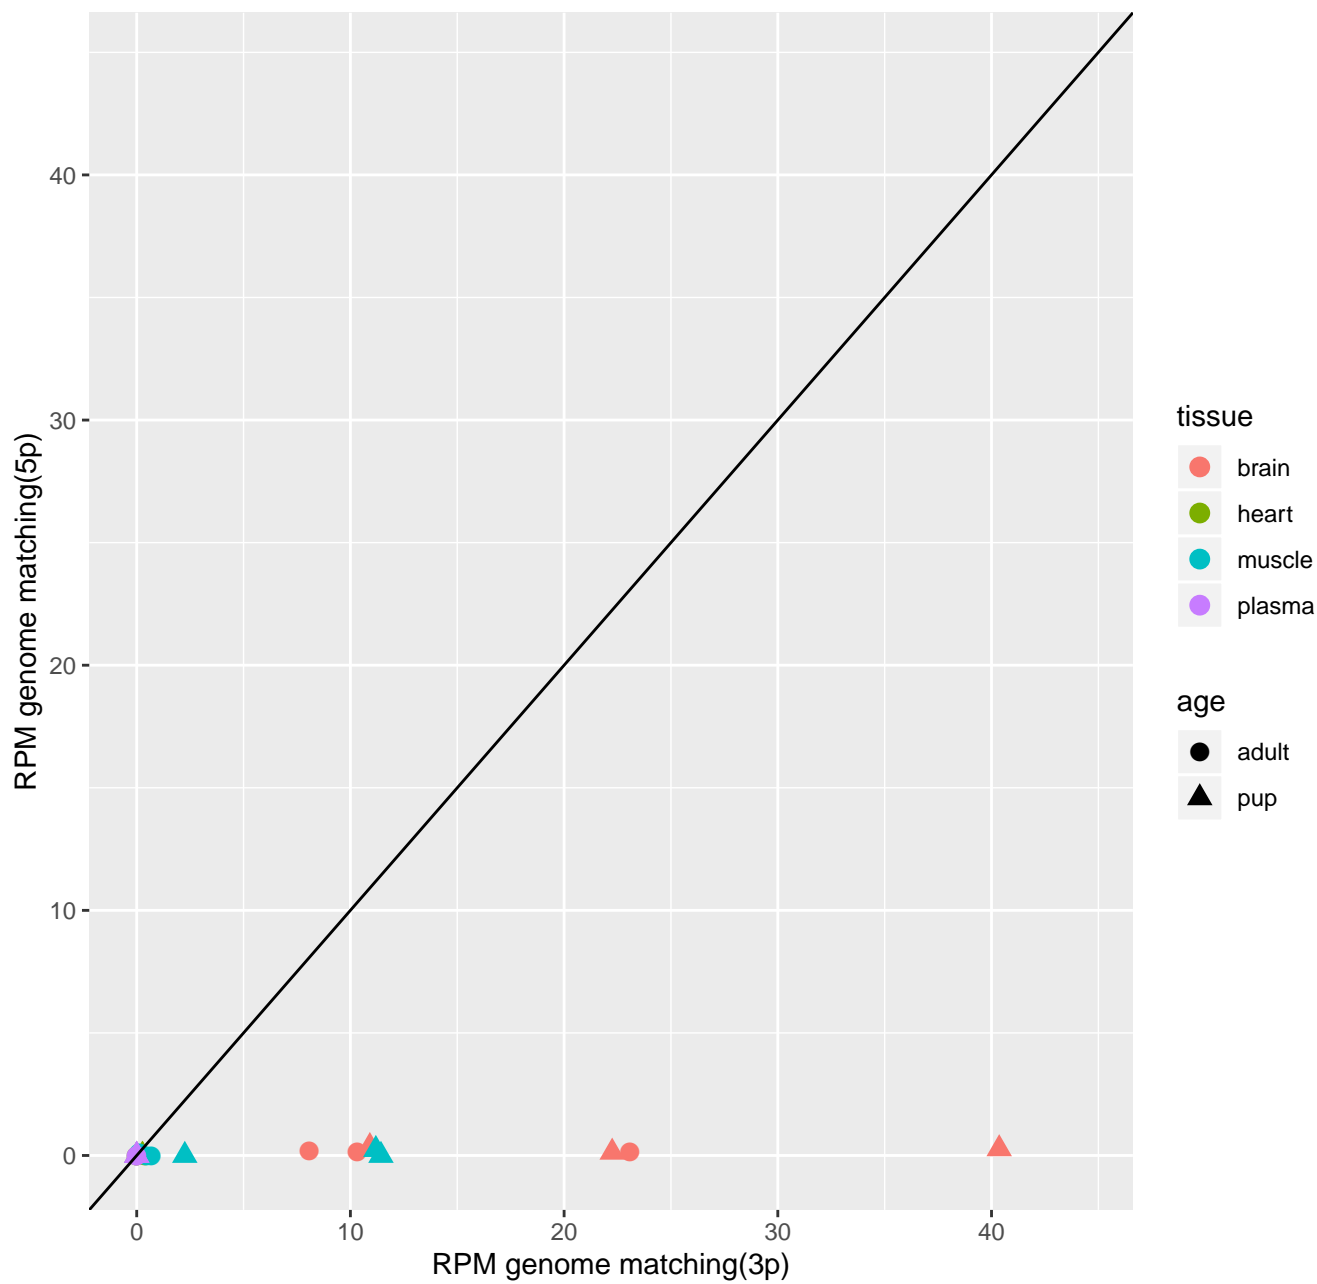



# lve-miR-485\_loc1

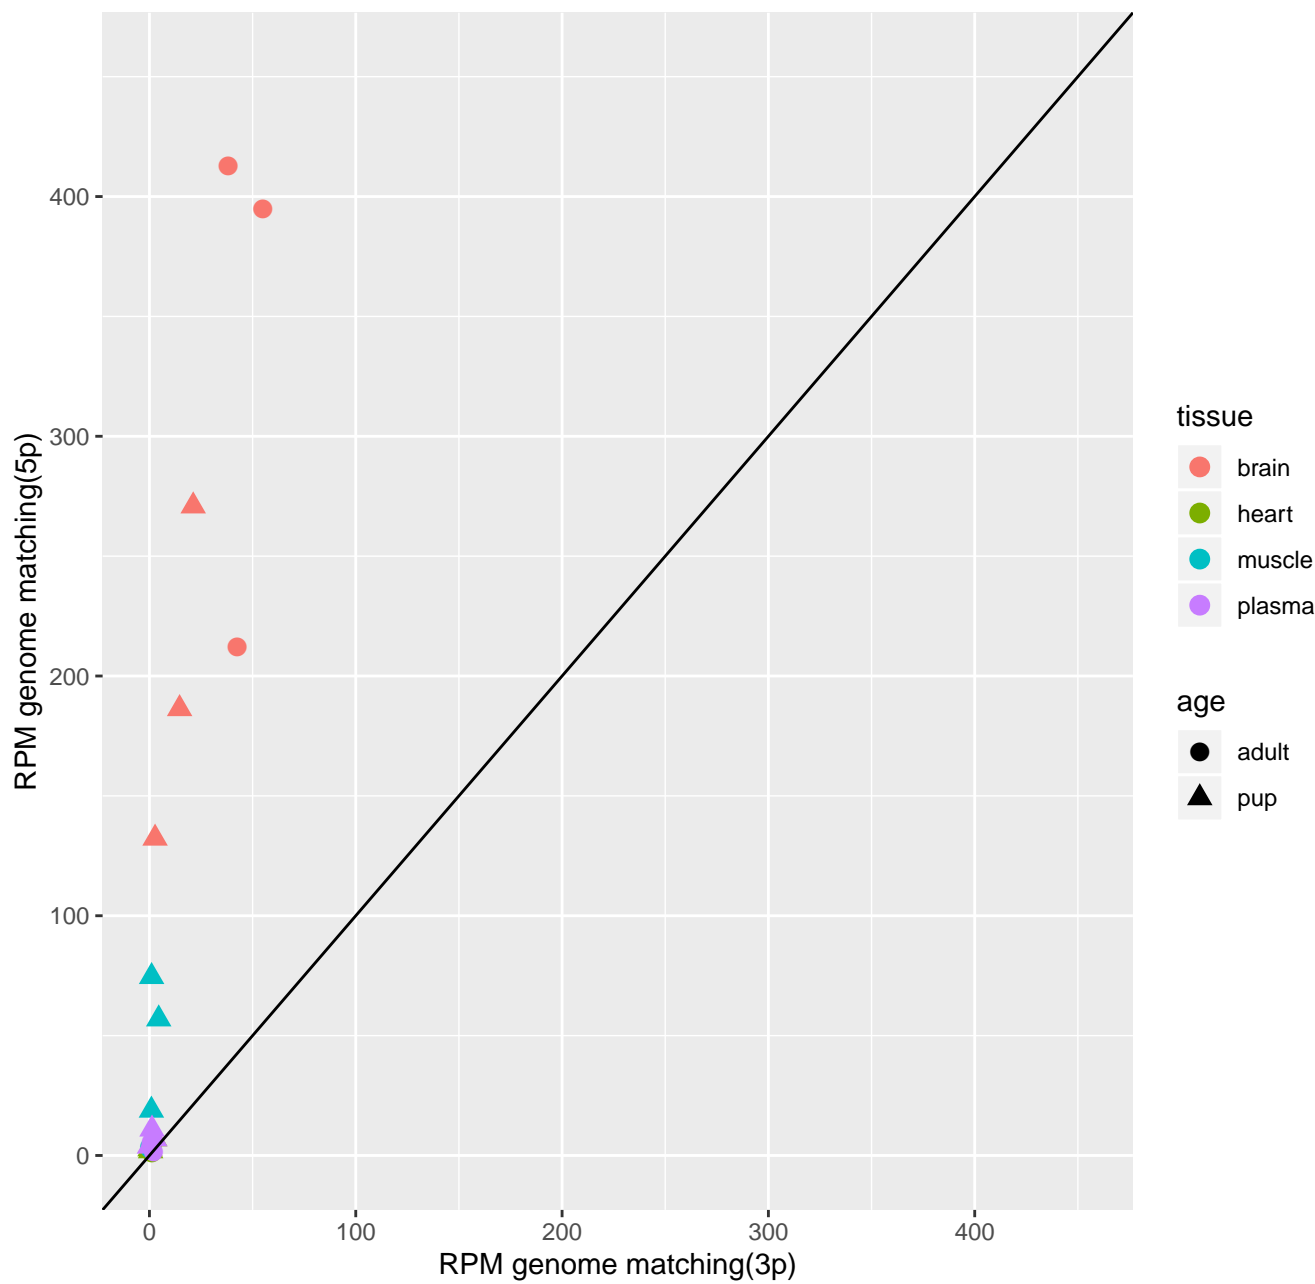



# lwe-miR-487a\_loc1

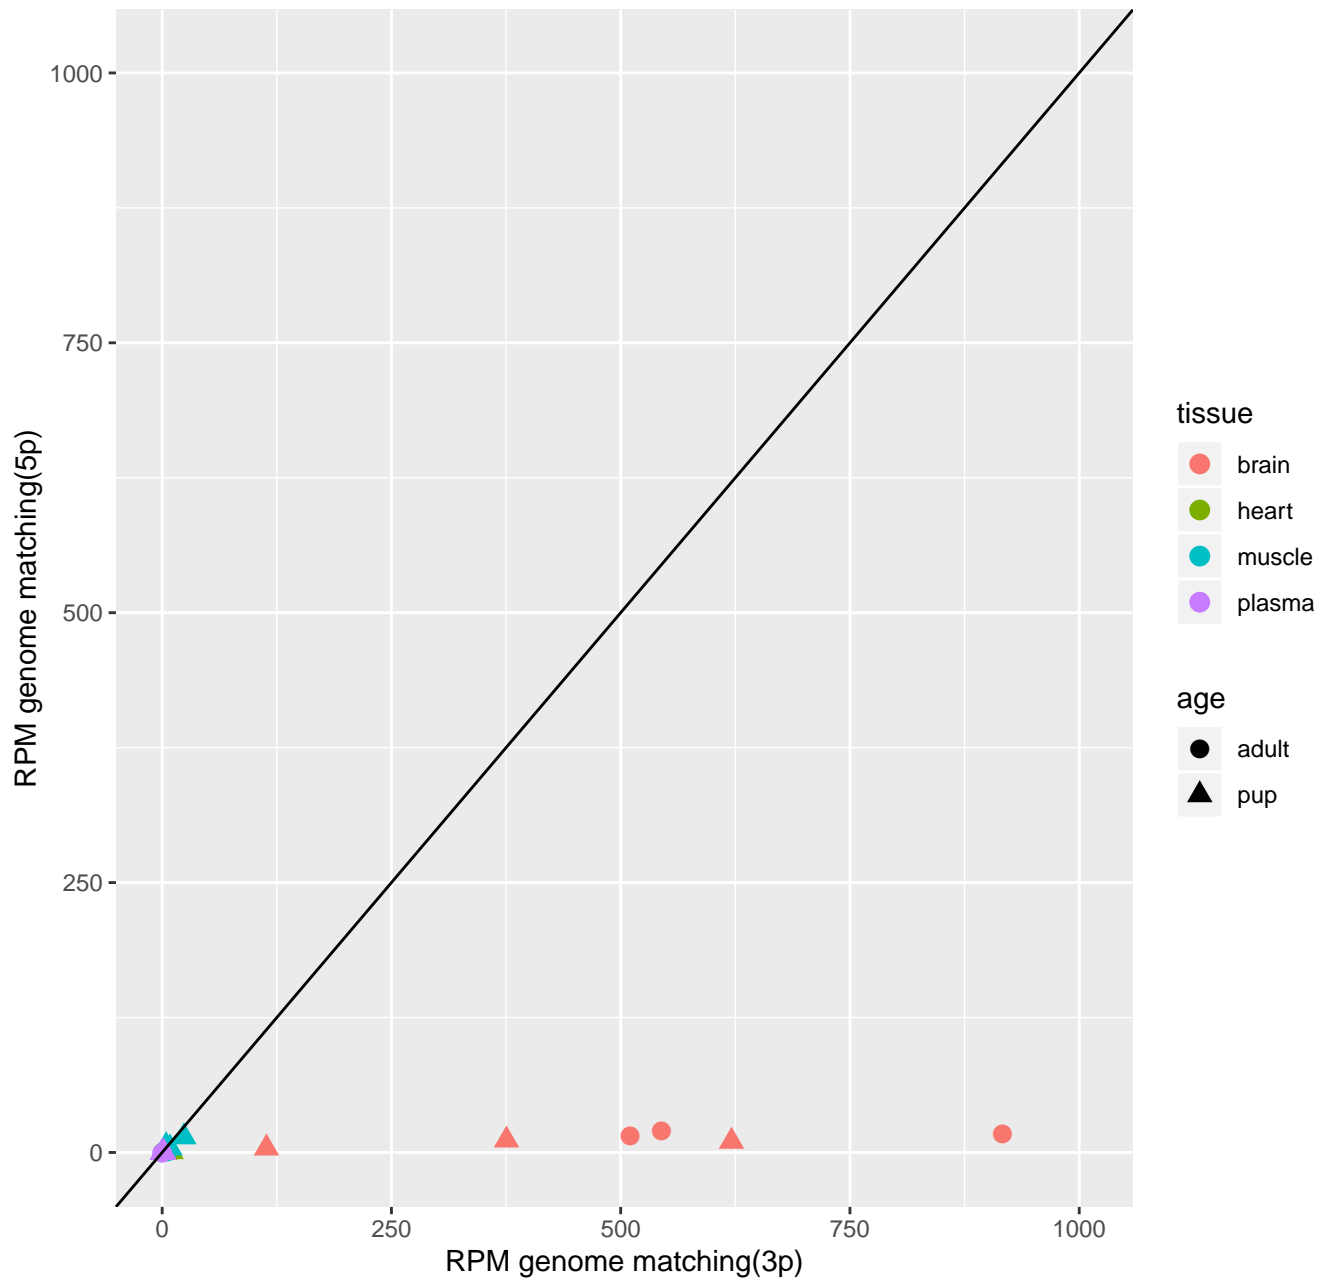

## lwe-miR-411c\_loc1

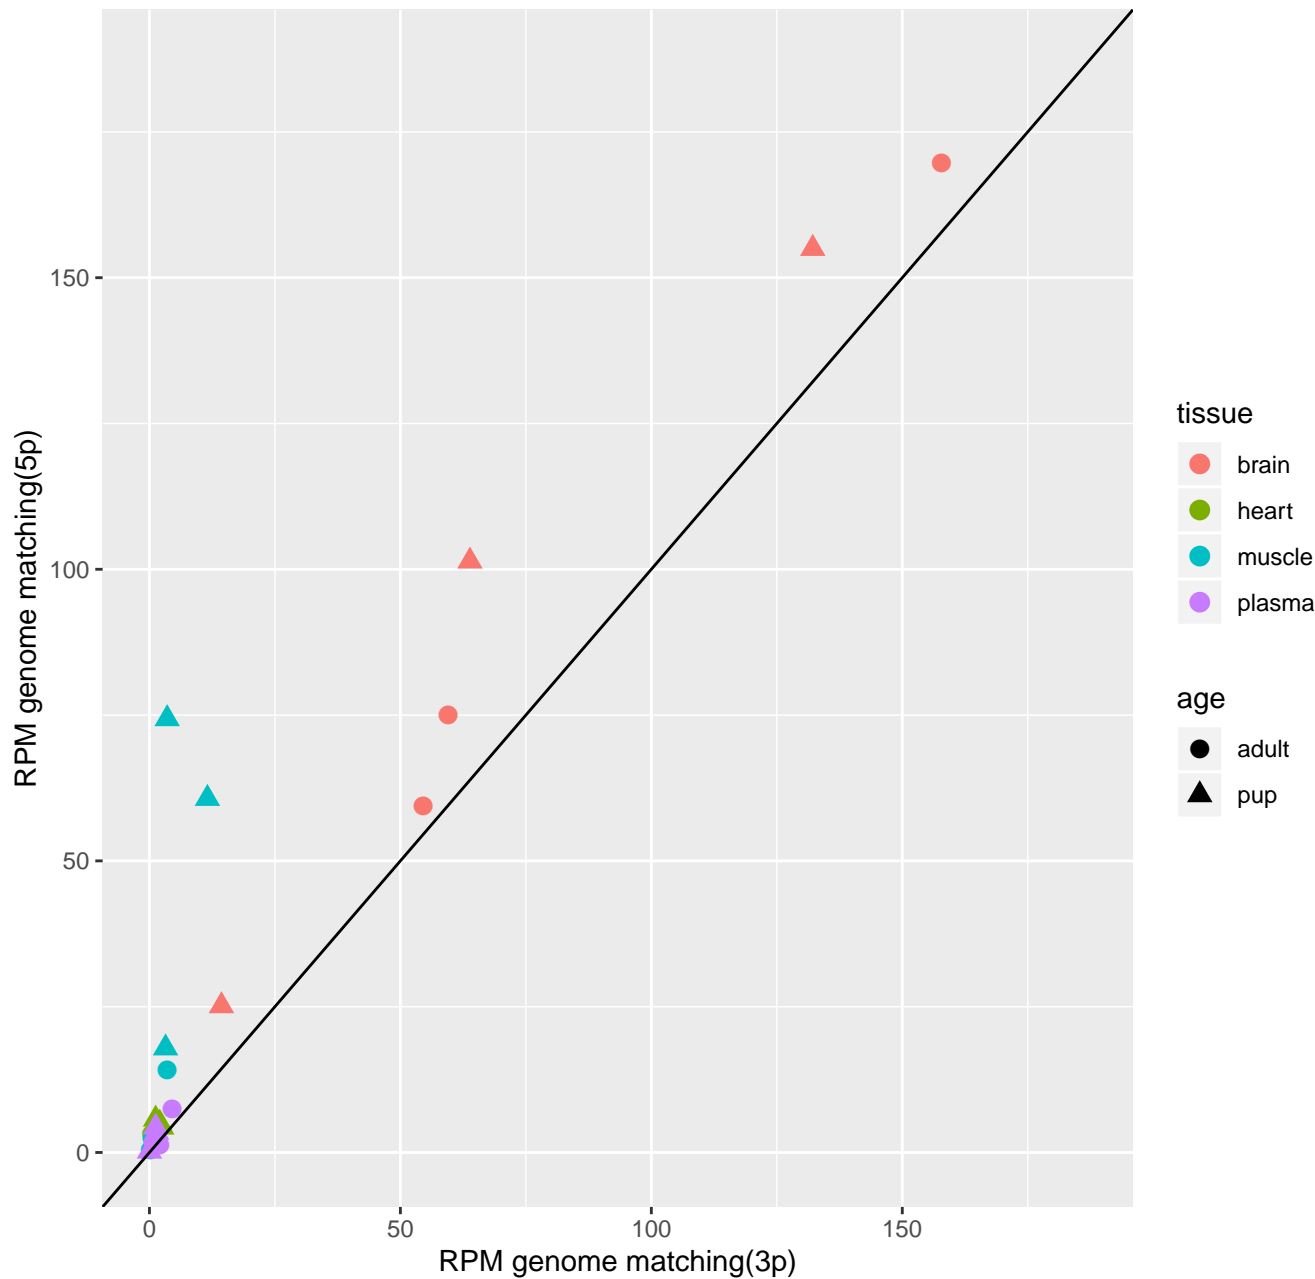

## lwe-miR-655\_loc1

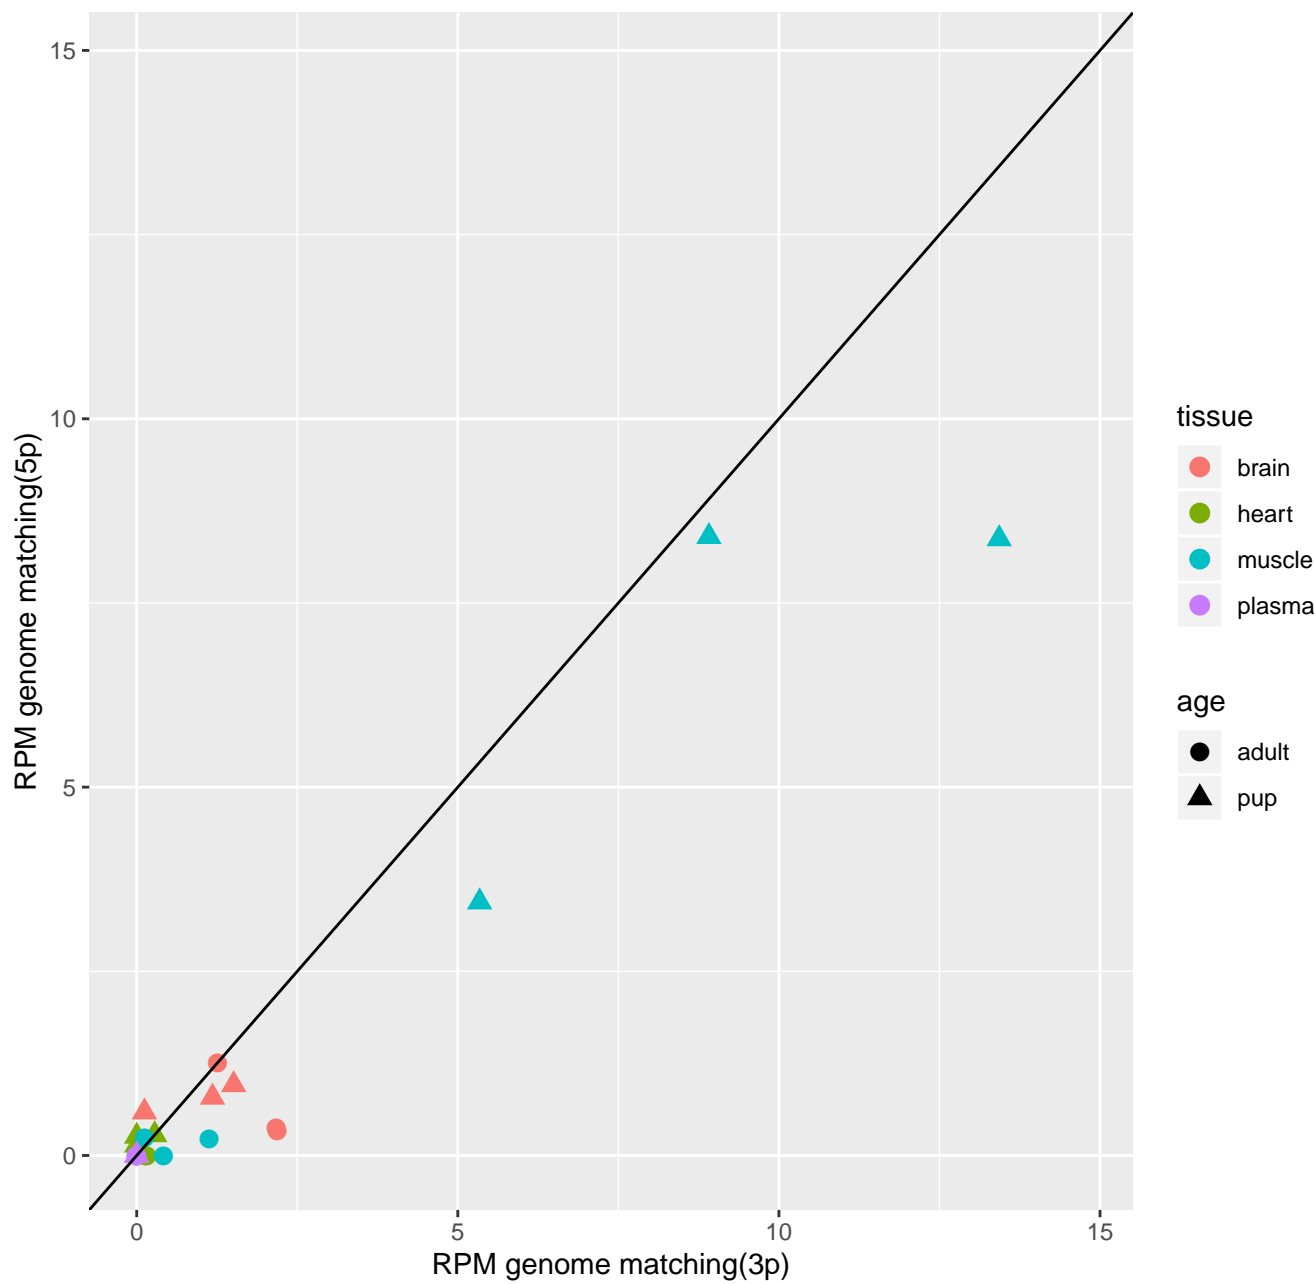

## lwe-miR-544\_loc1

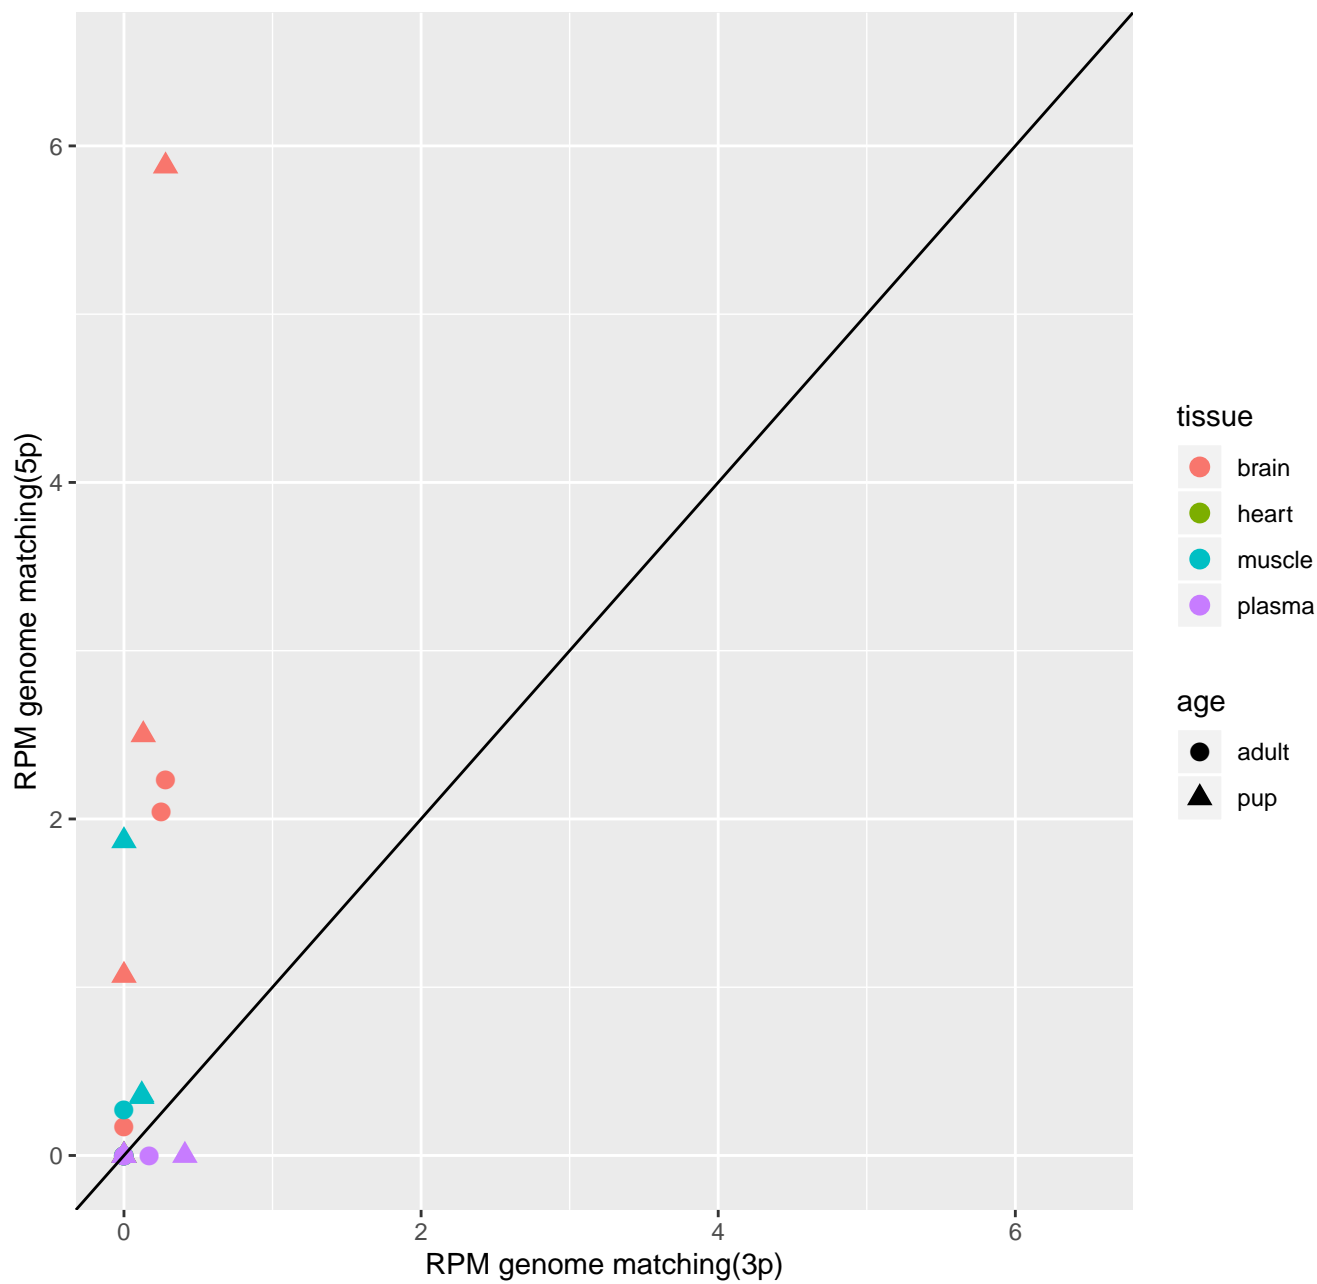

## lwe-miR-889\_loc1

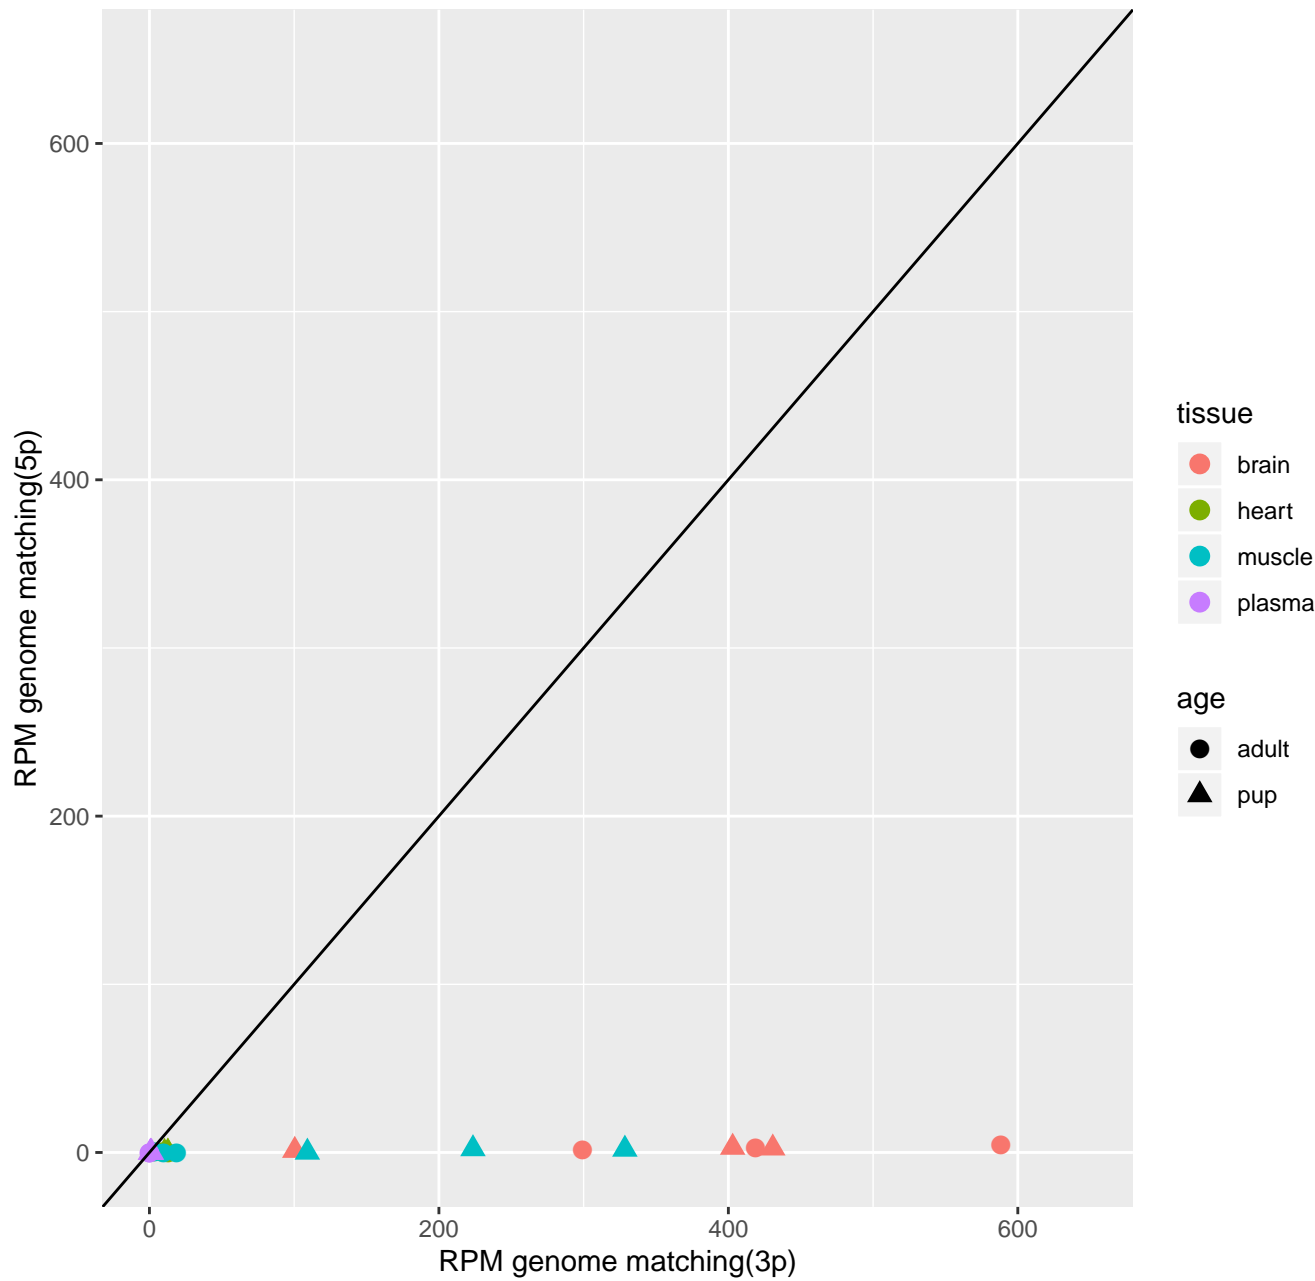

# lwe-miR-539\_loc1

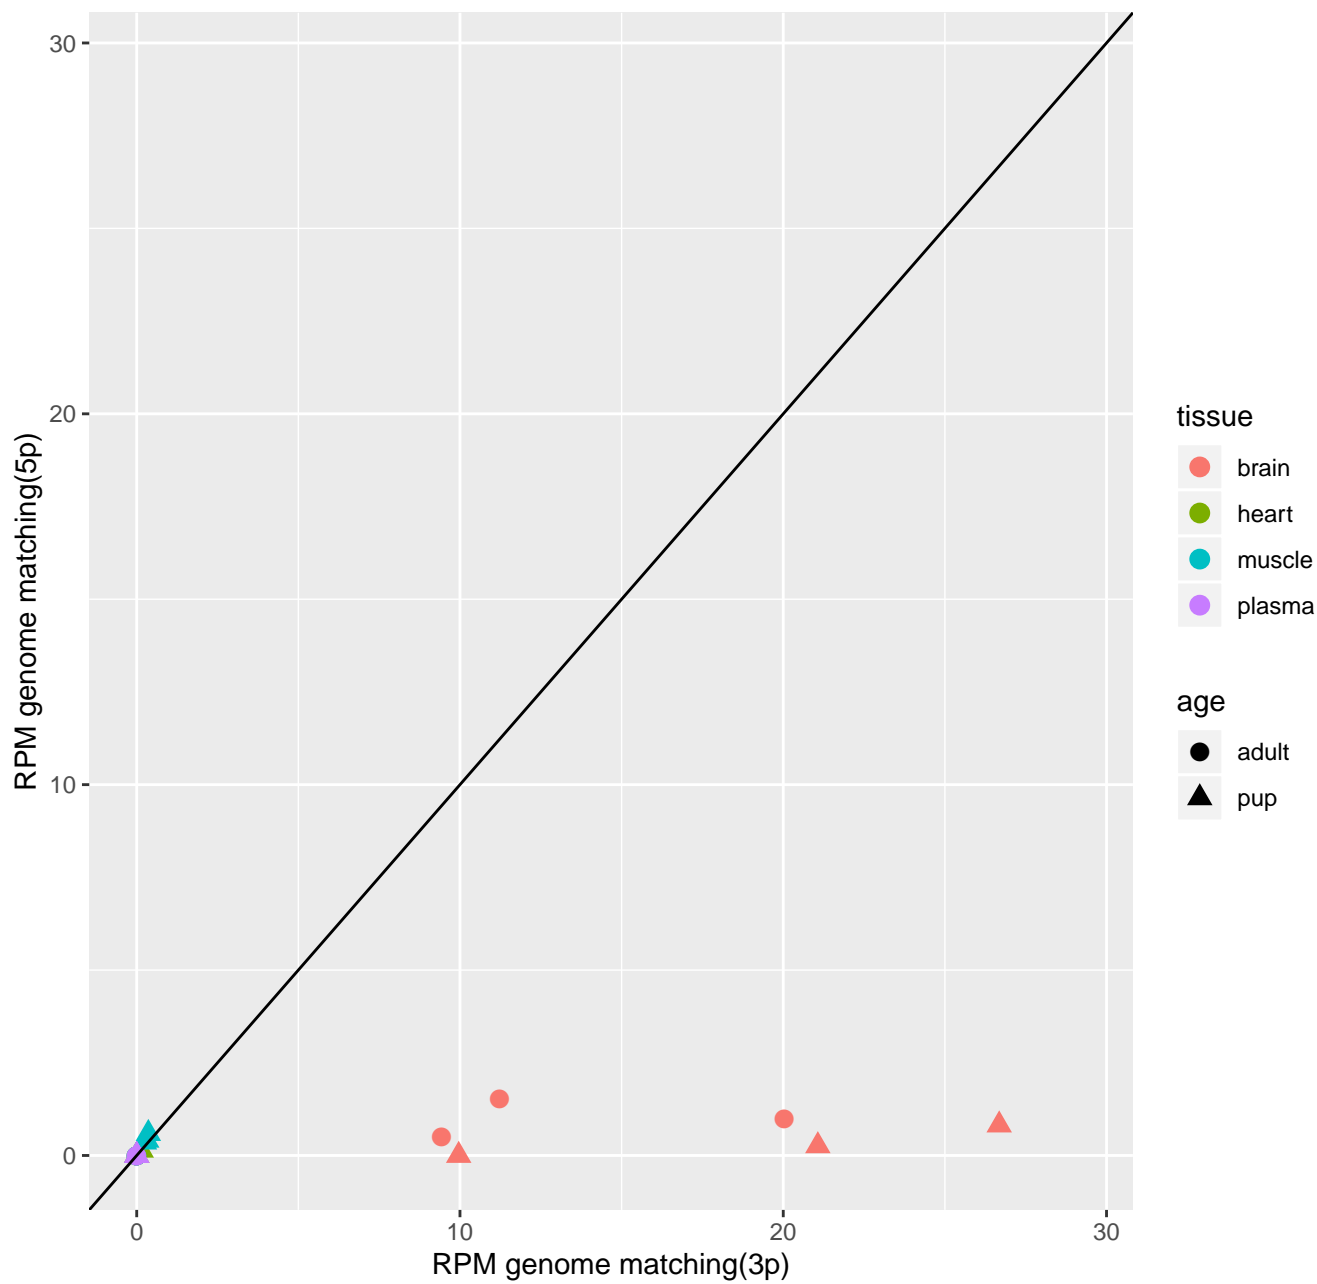



# lwe-miR-487b\_loc1

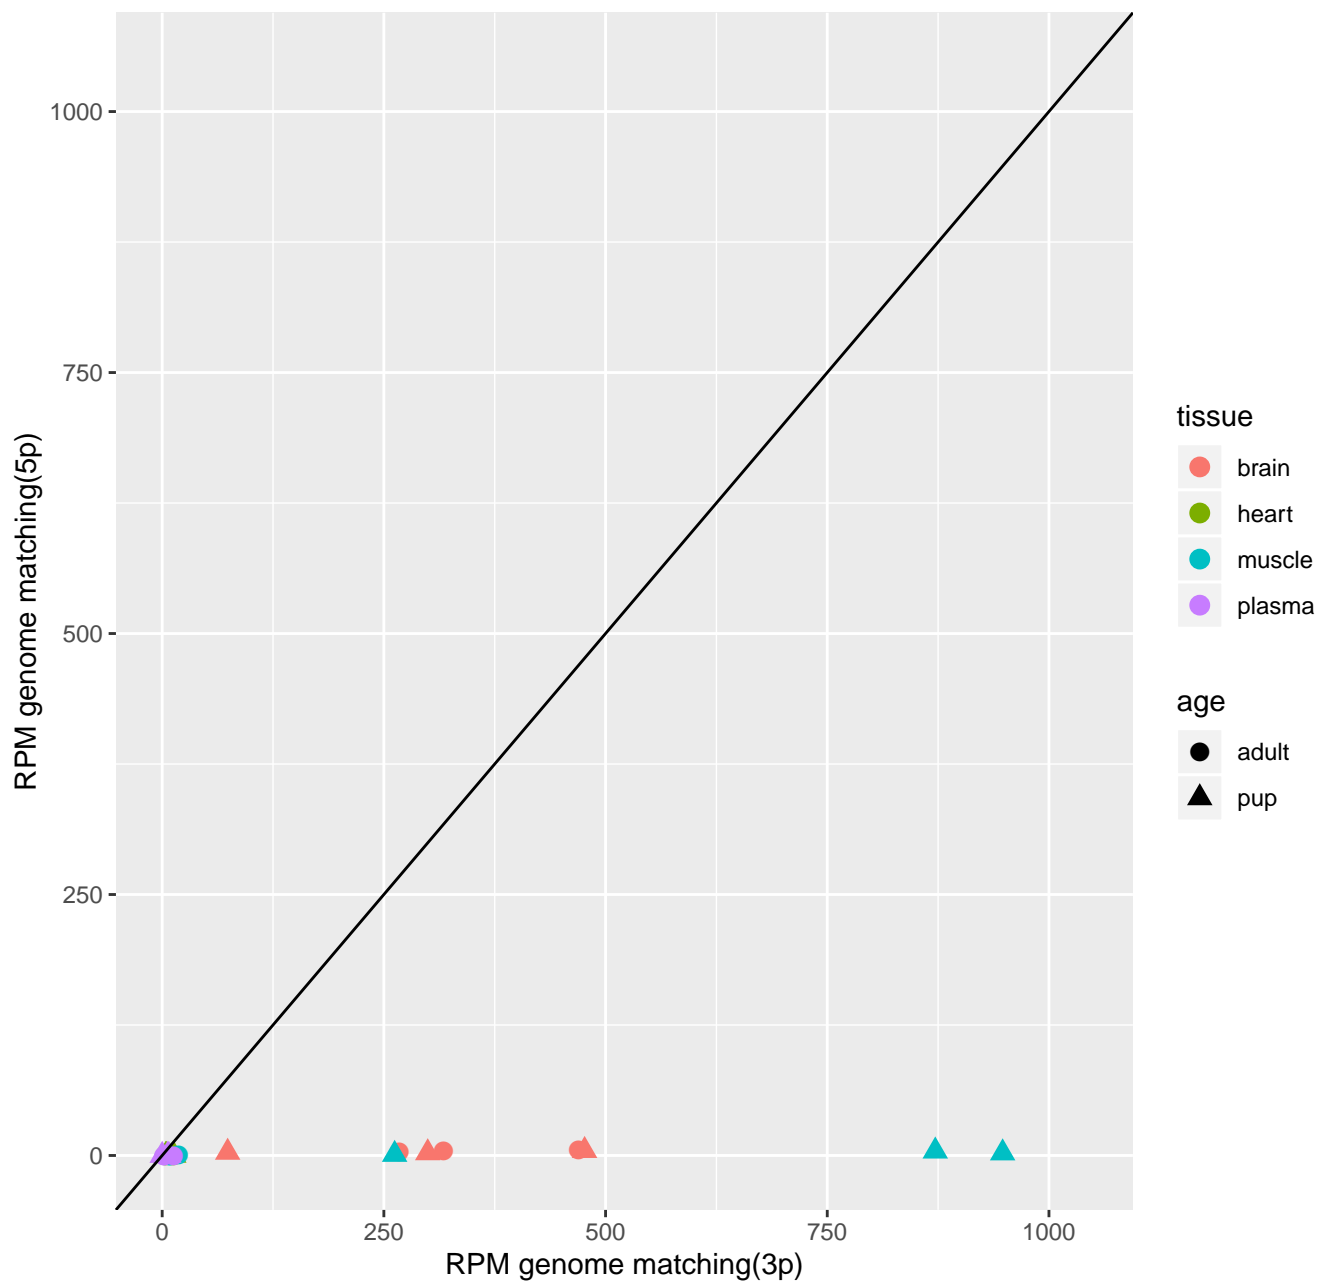

# lwe-miR-381\_loc1

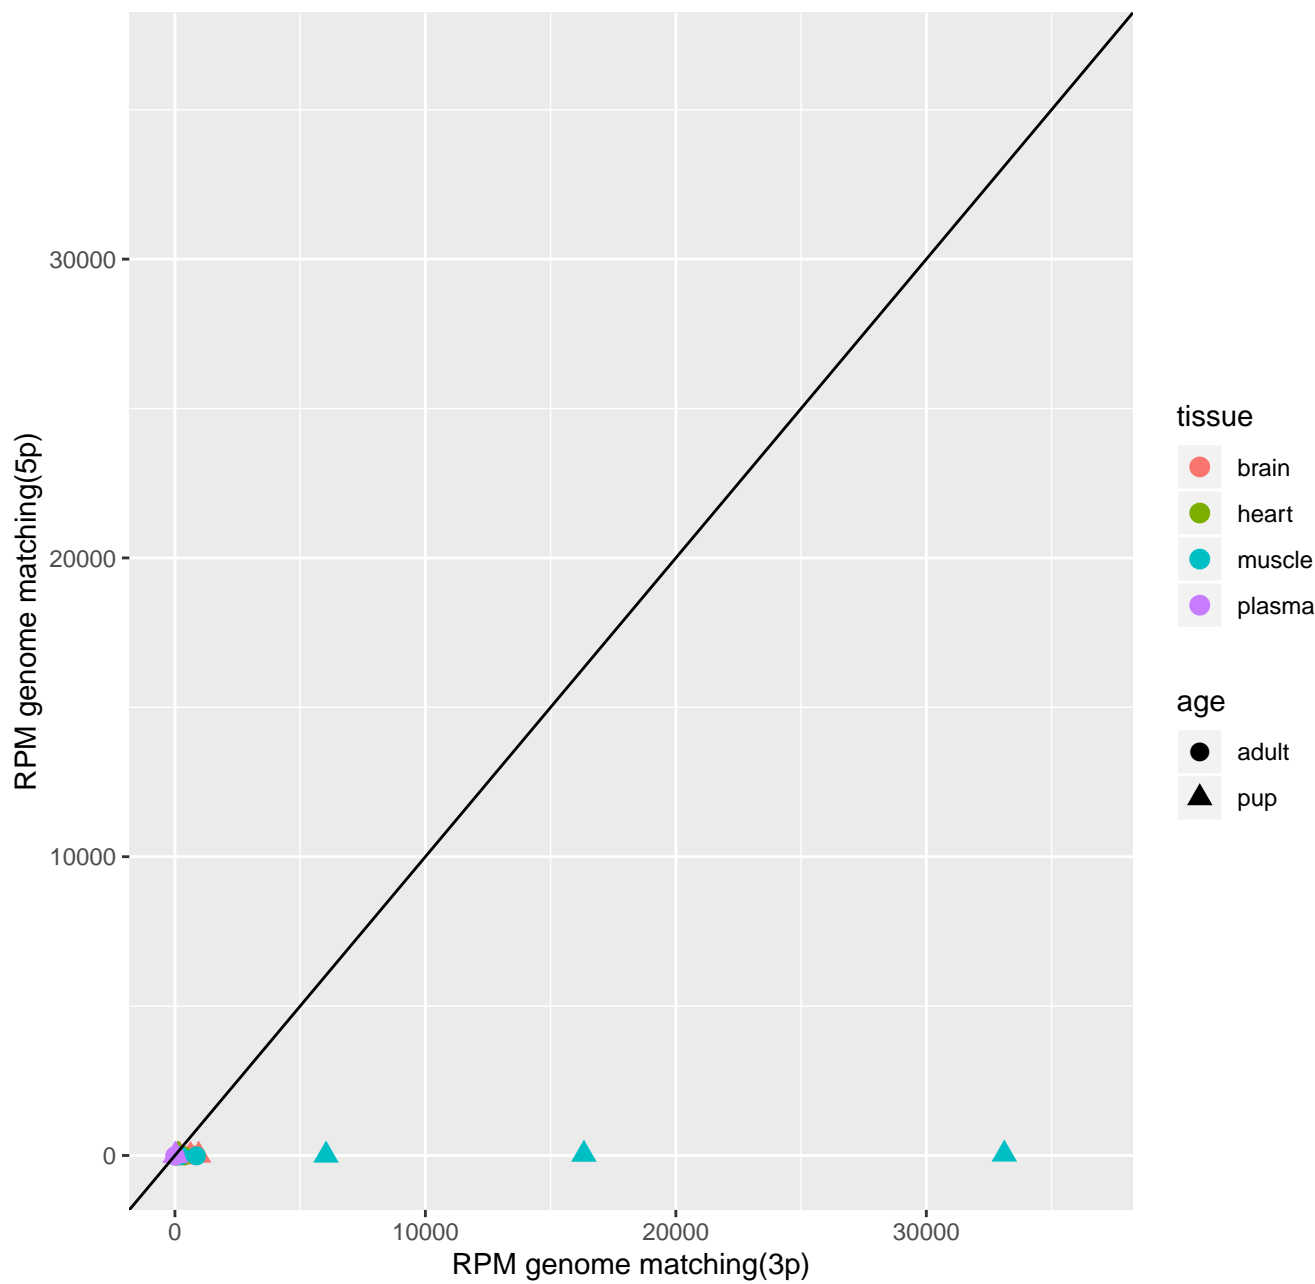

# lve-miR-1185\_loc1

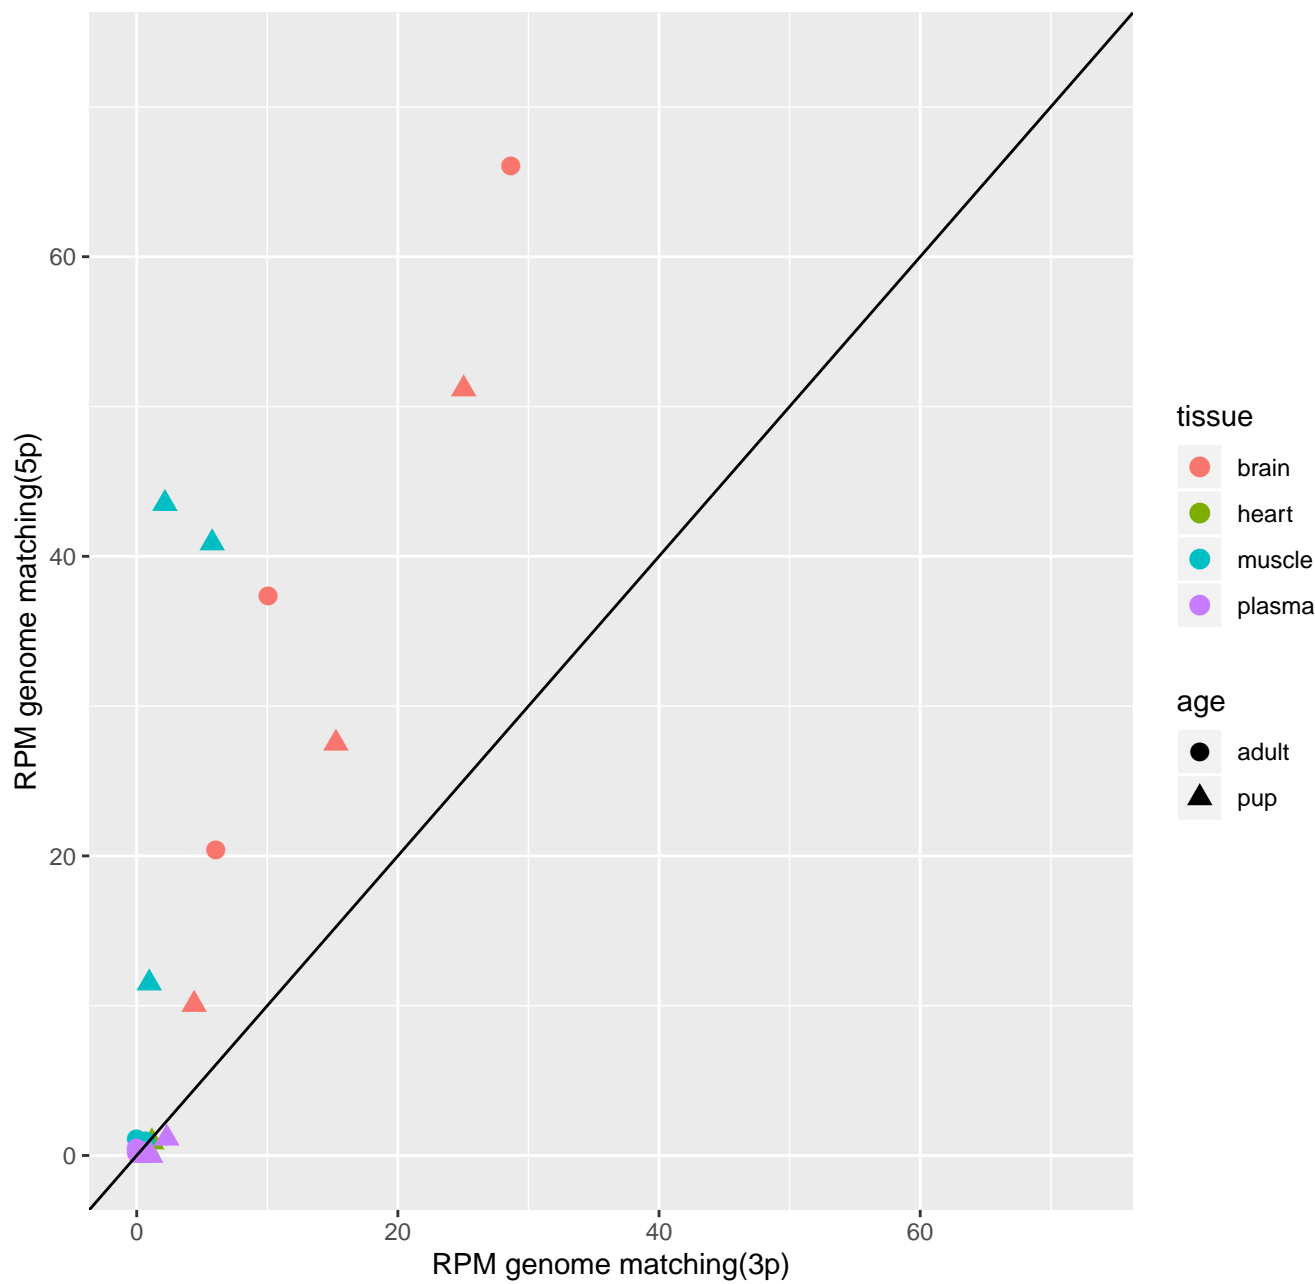

# lwe-miR-376a\_loc1

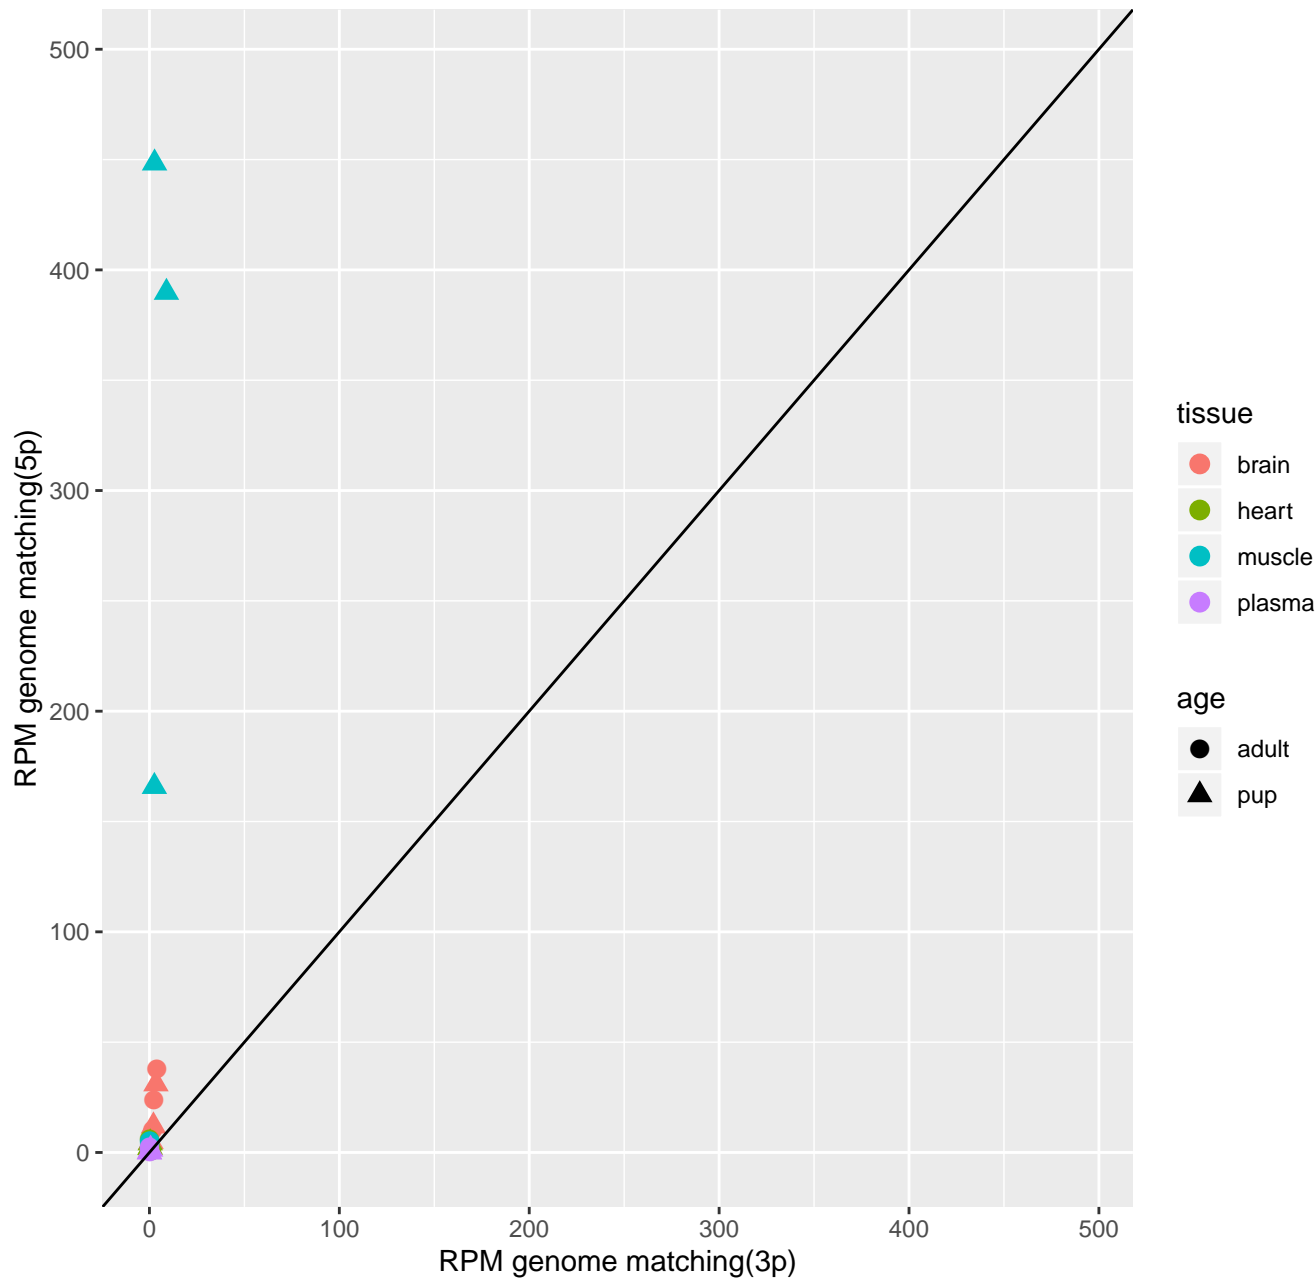

## lwe-miR-376b\_loc1

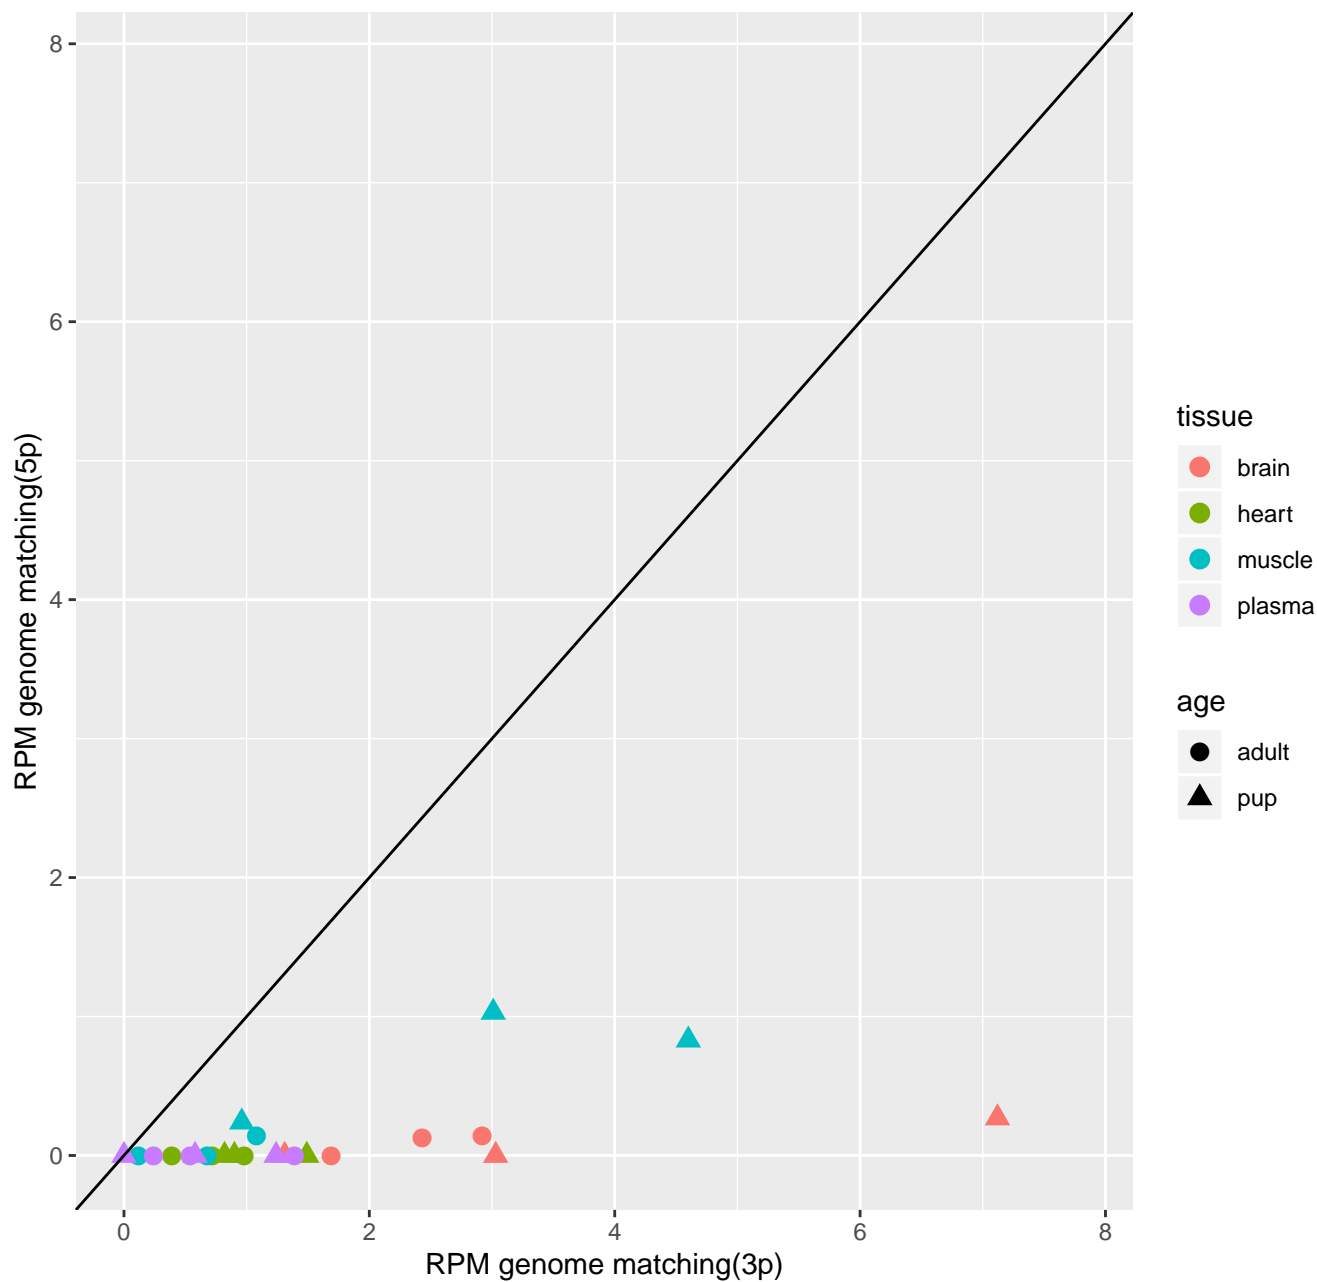

## lwe-miR-376a\_loc2

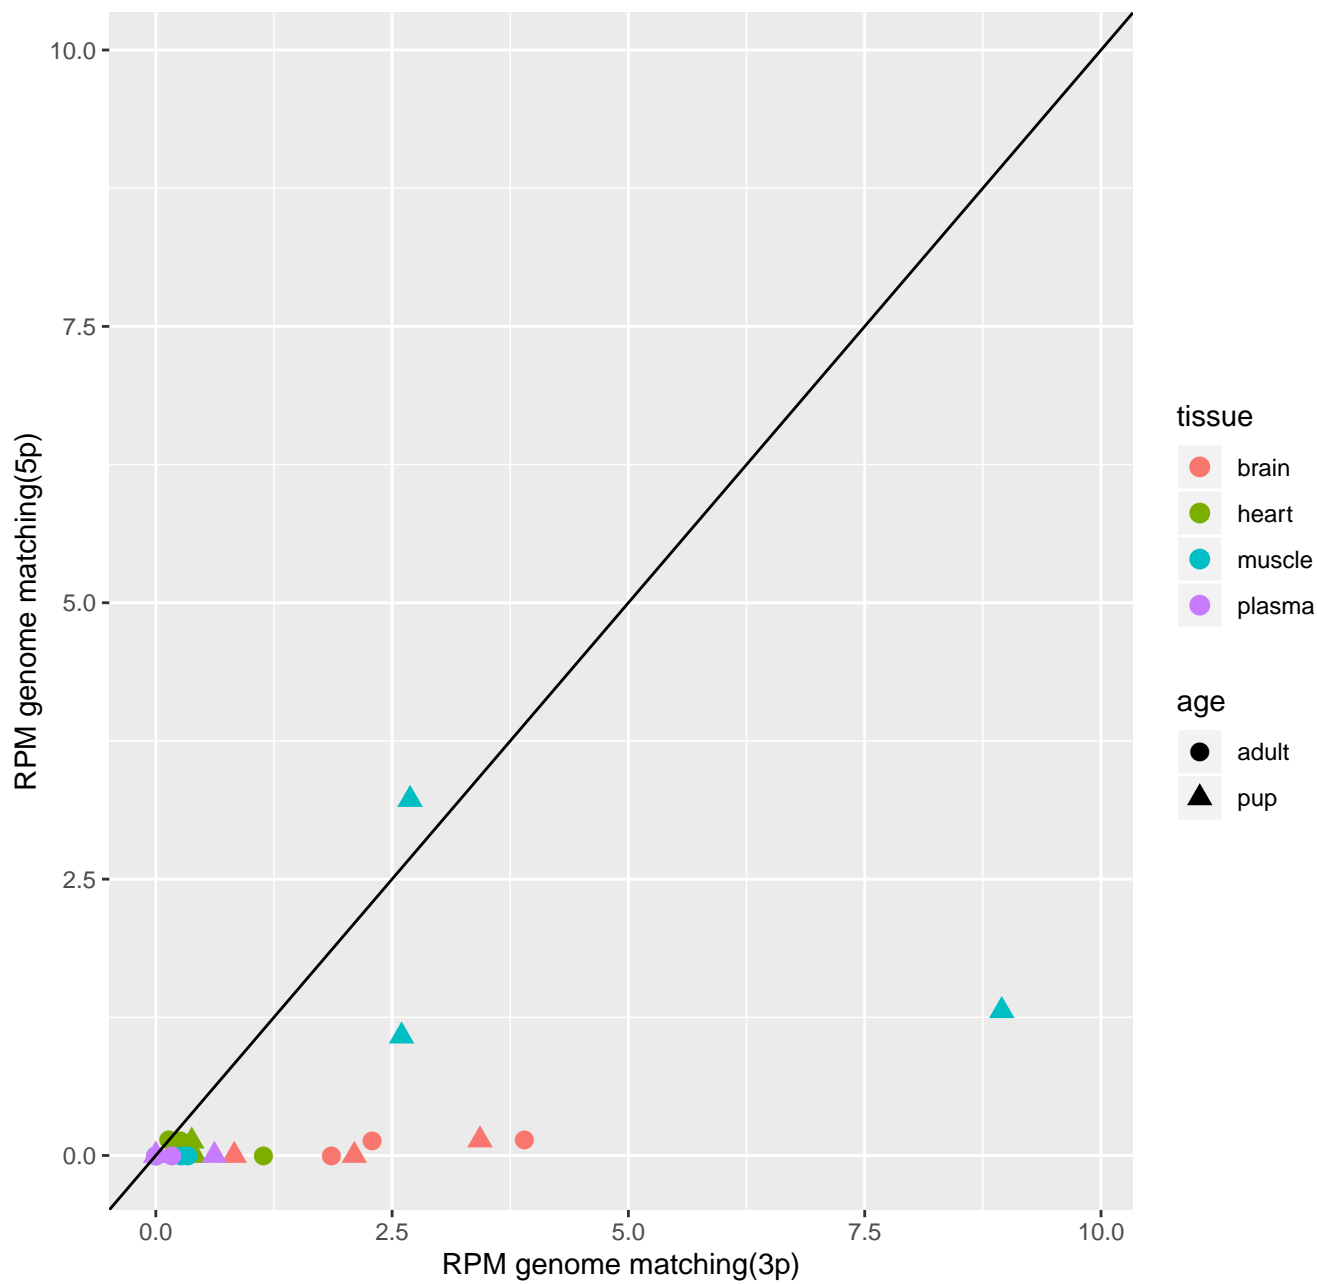

## lwe-miR-376b\_loc2

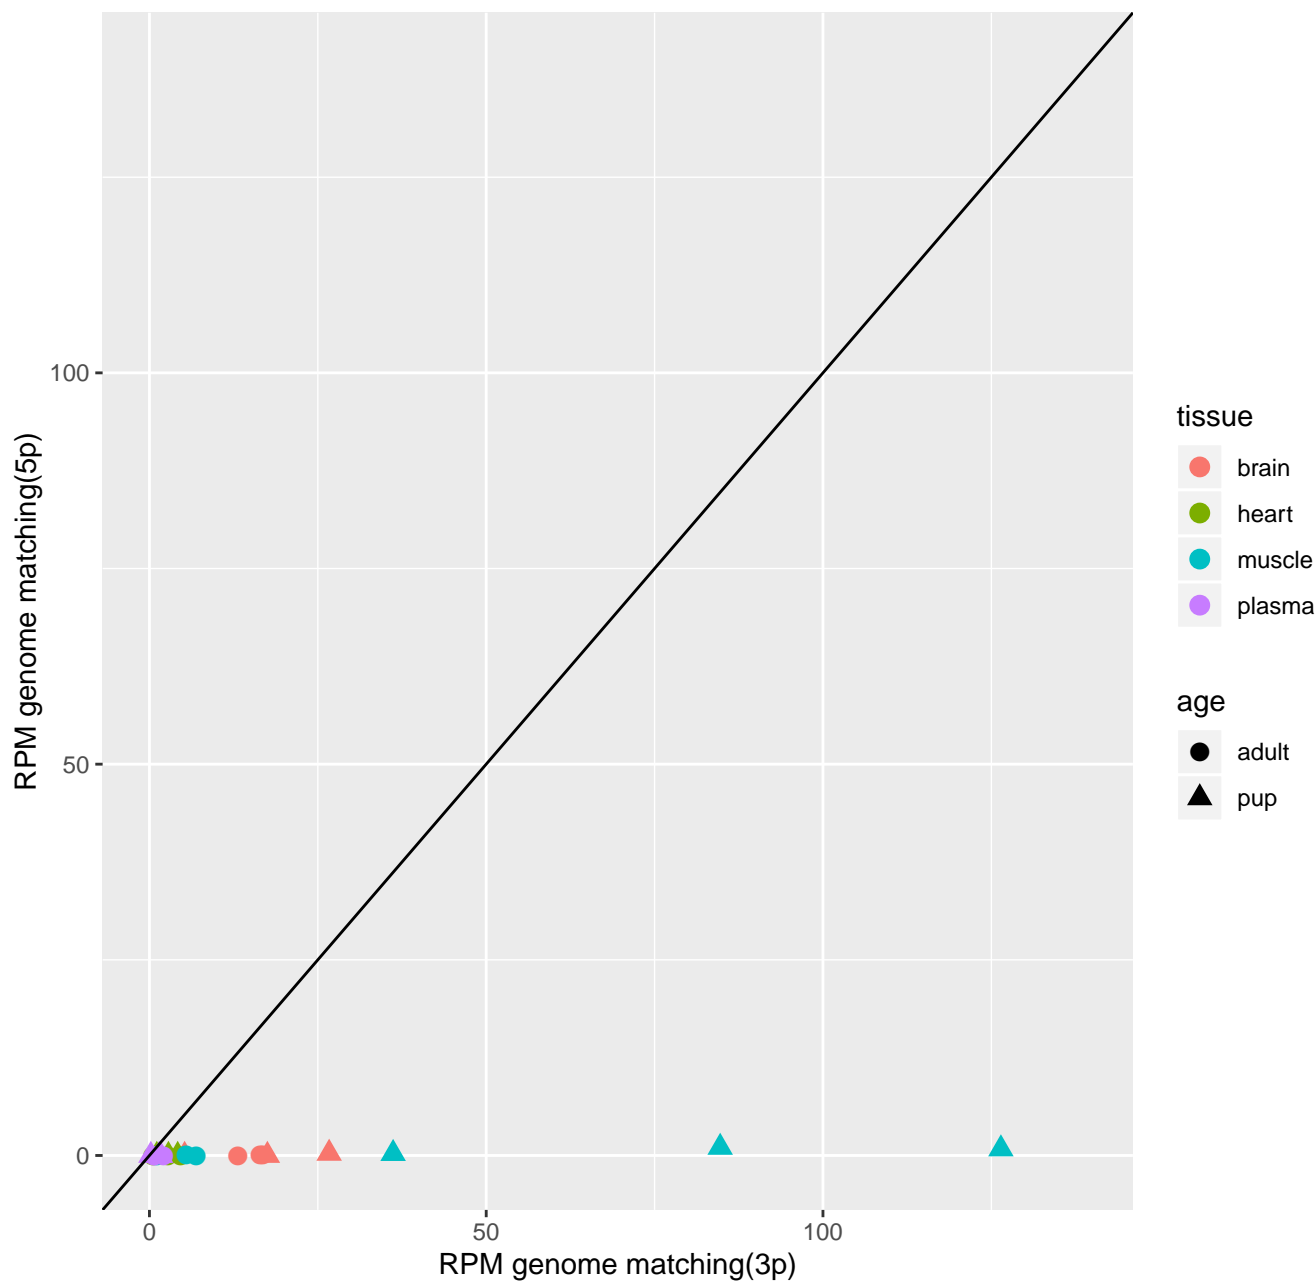

## let-7b\_loc1

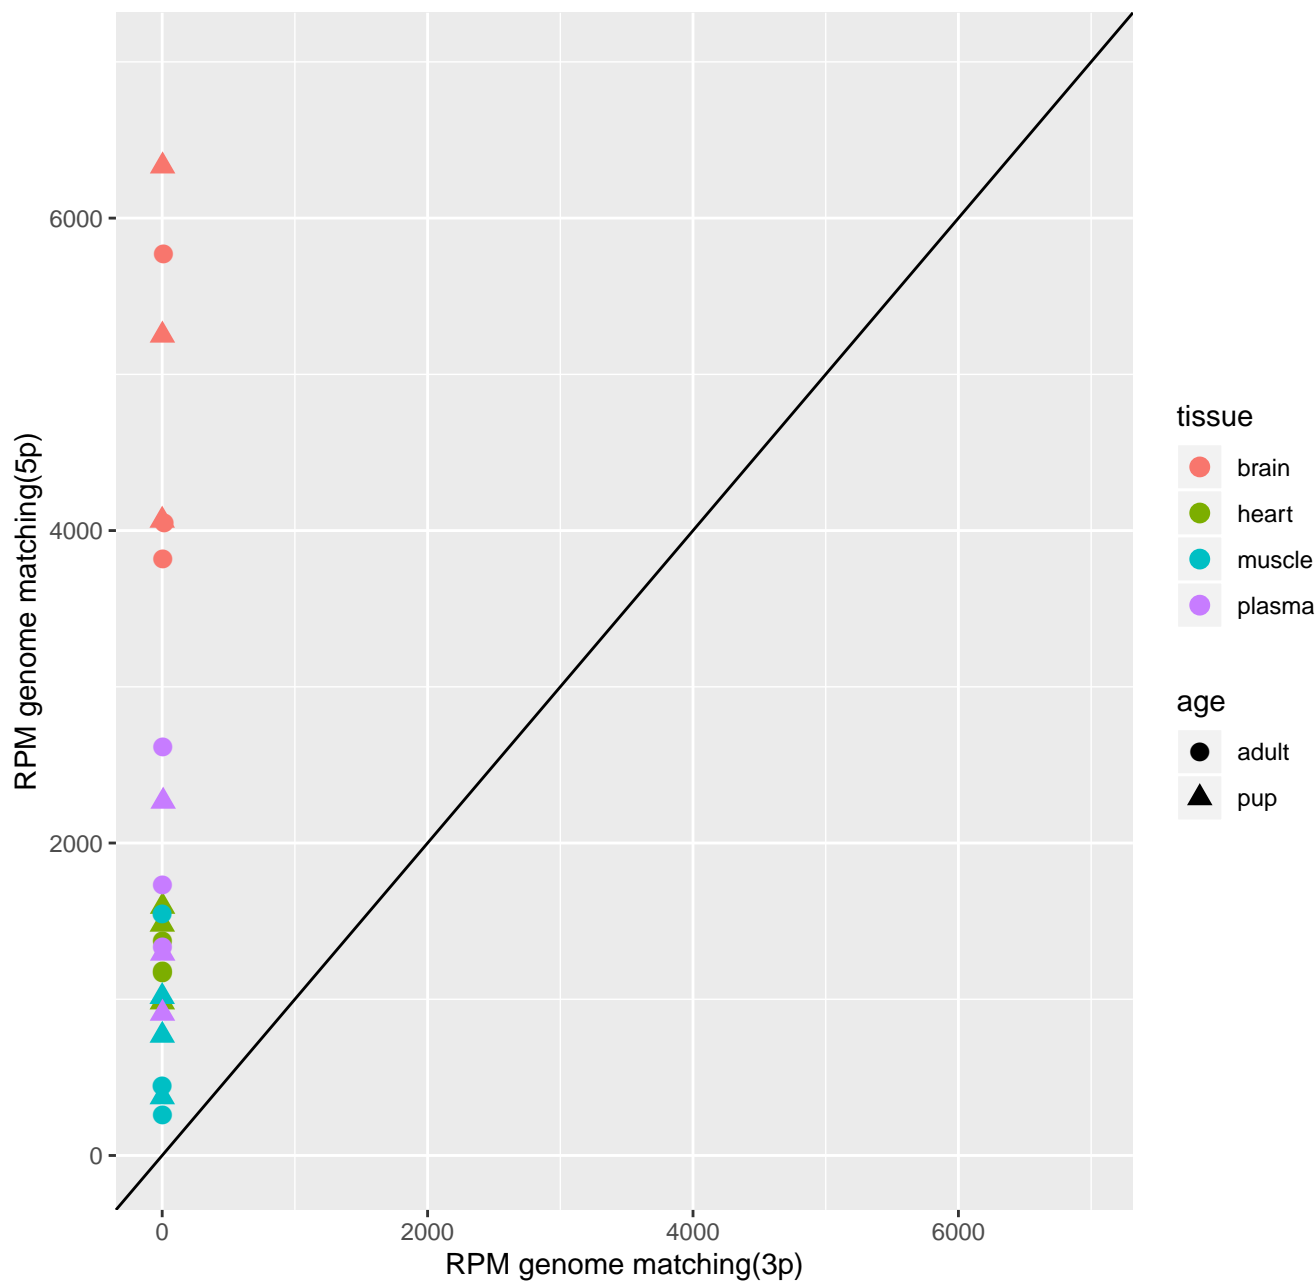



## let-7a\_loc4

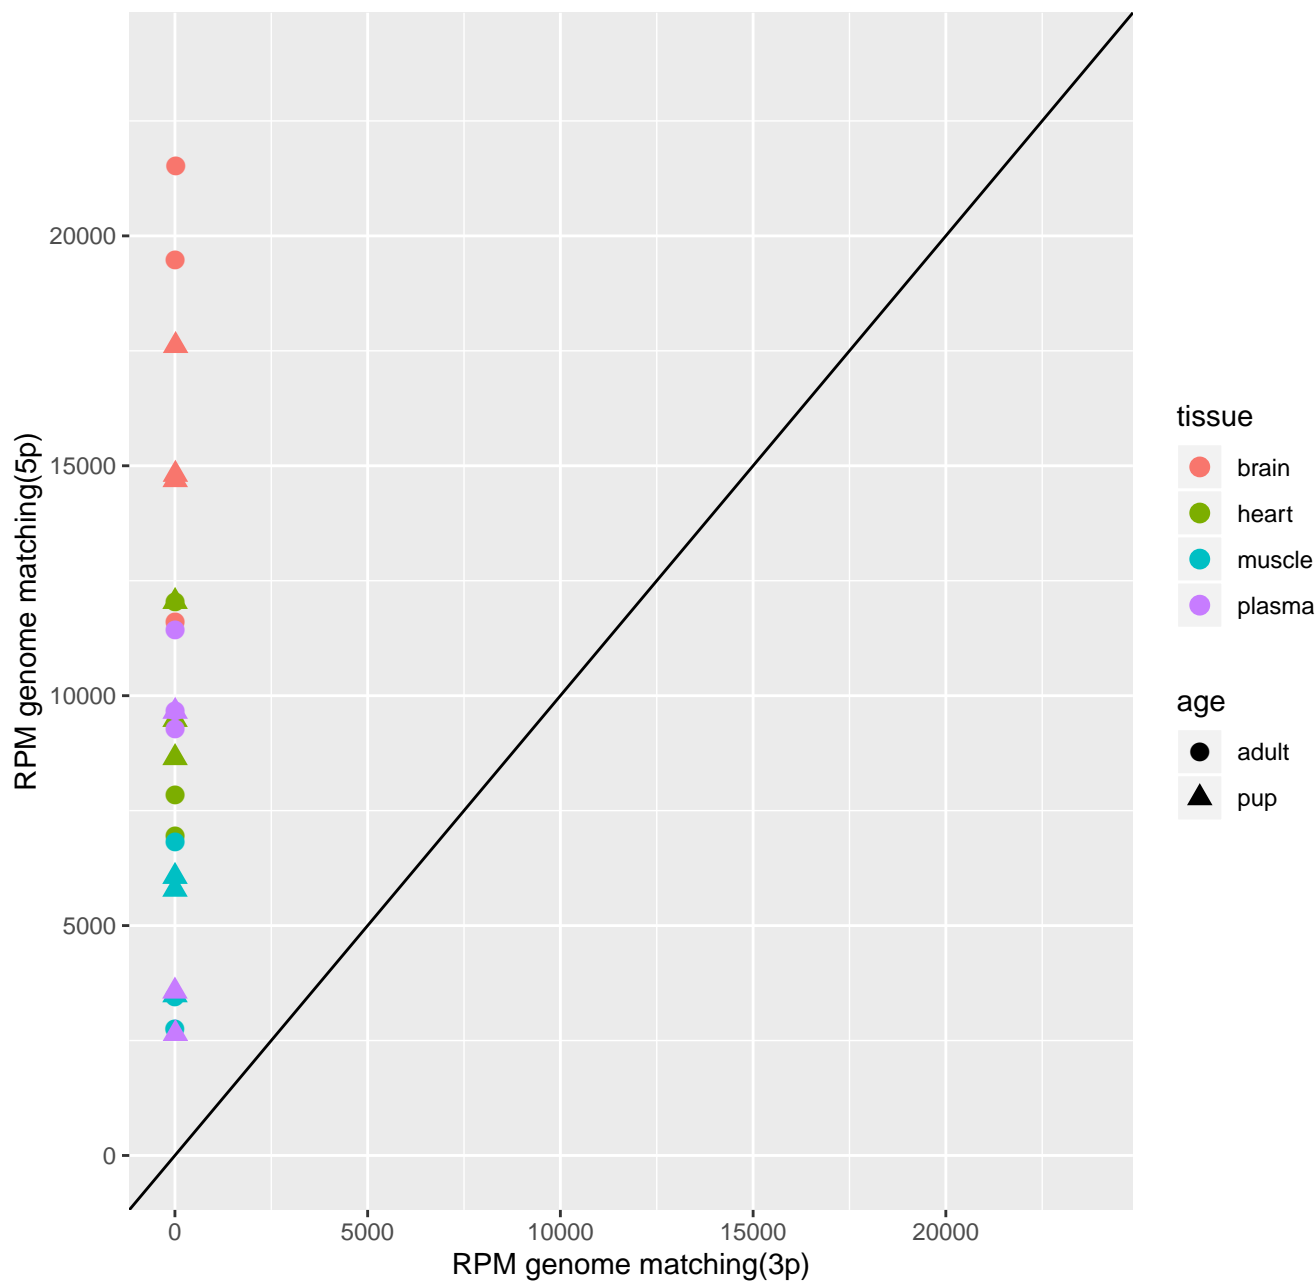

## lwe-miR-218a\_loc2

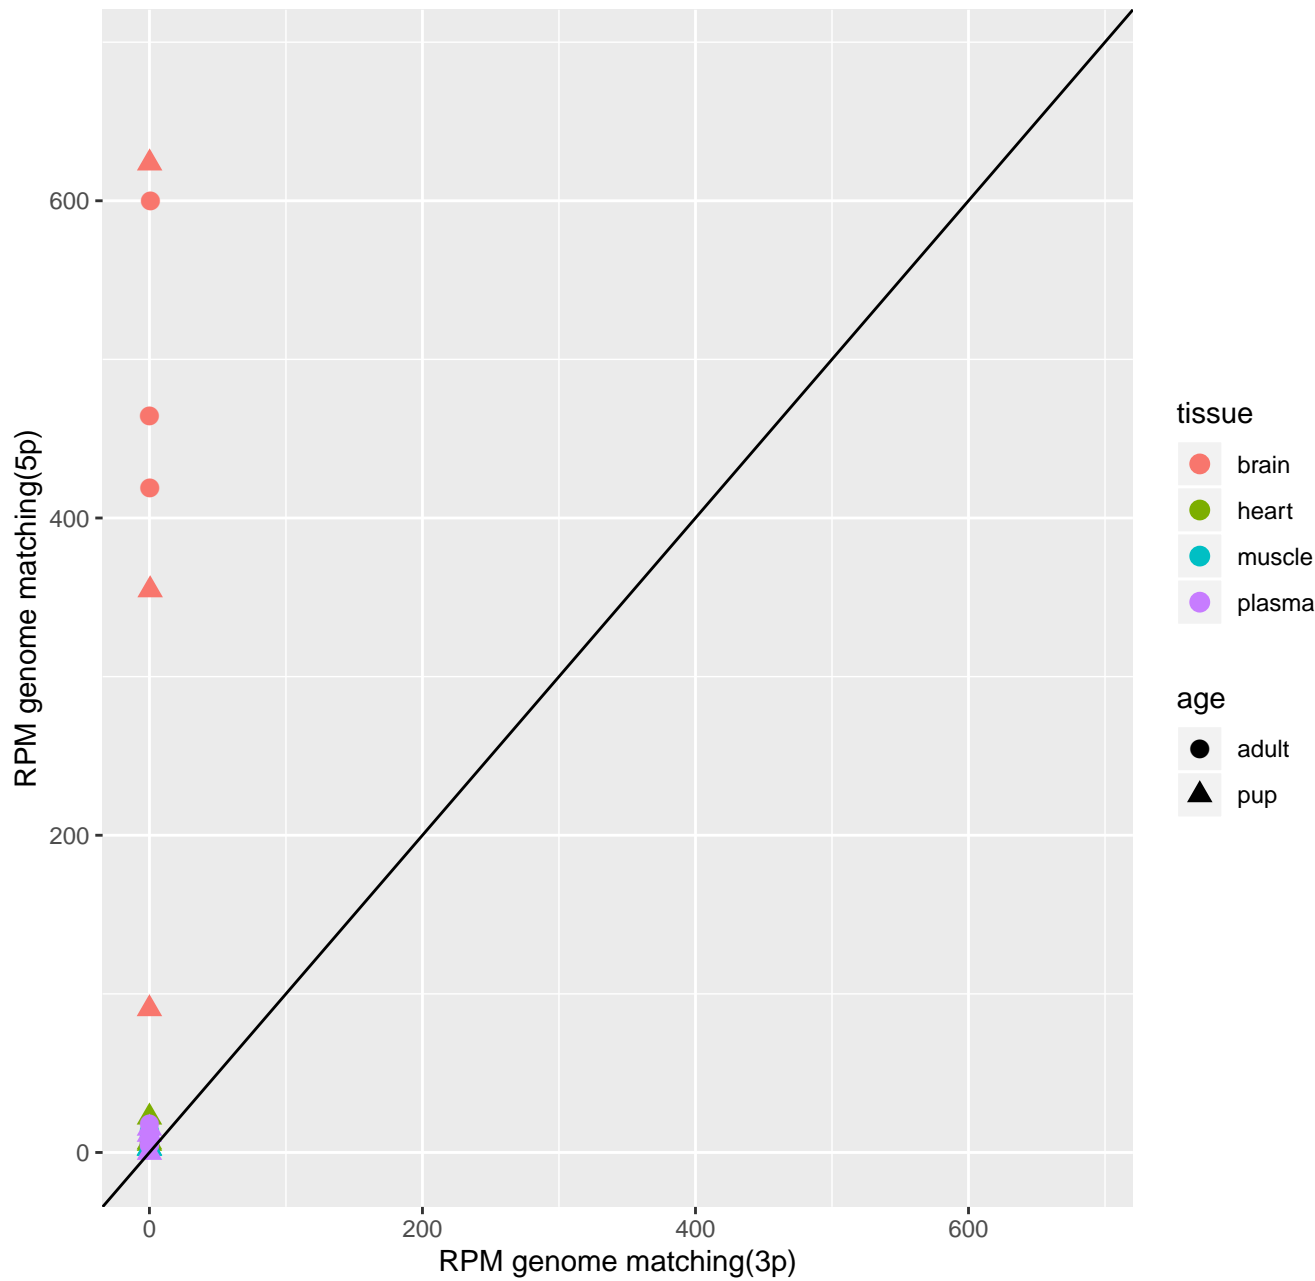

## lwe-miR-455a\_loc1

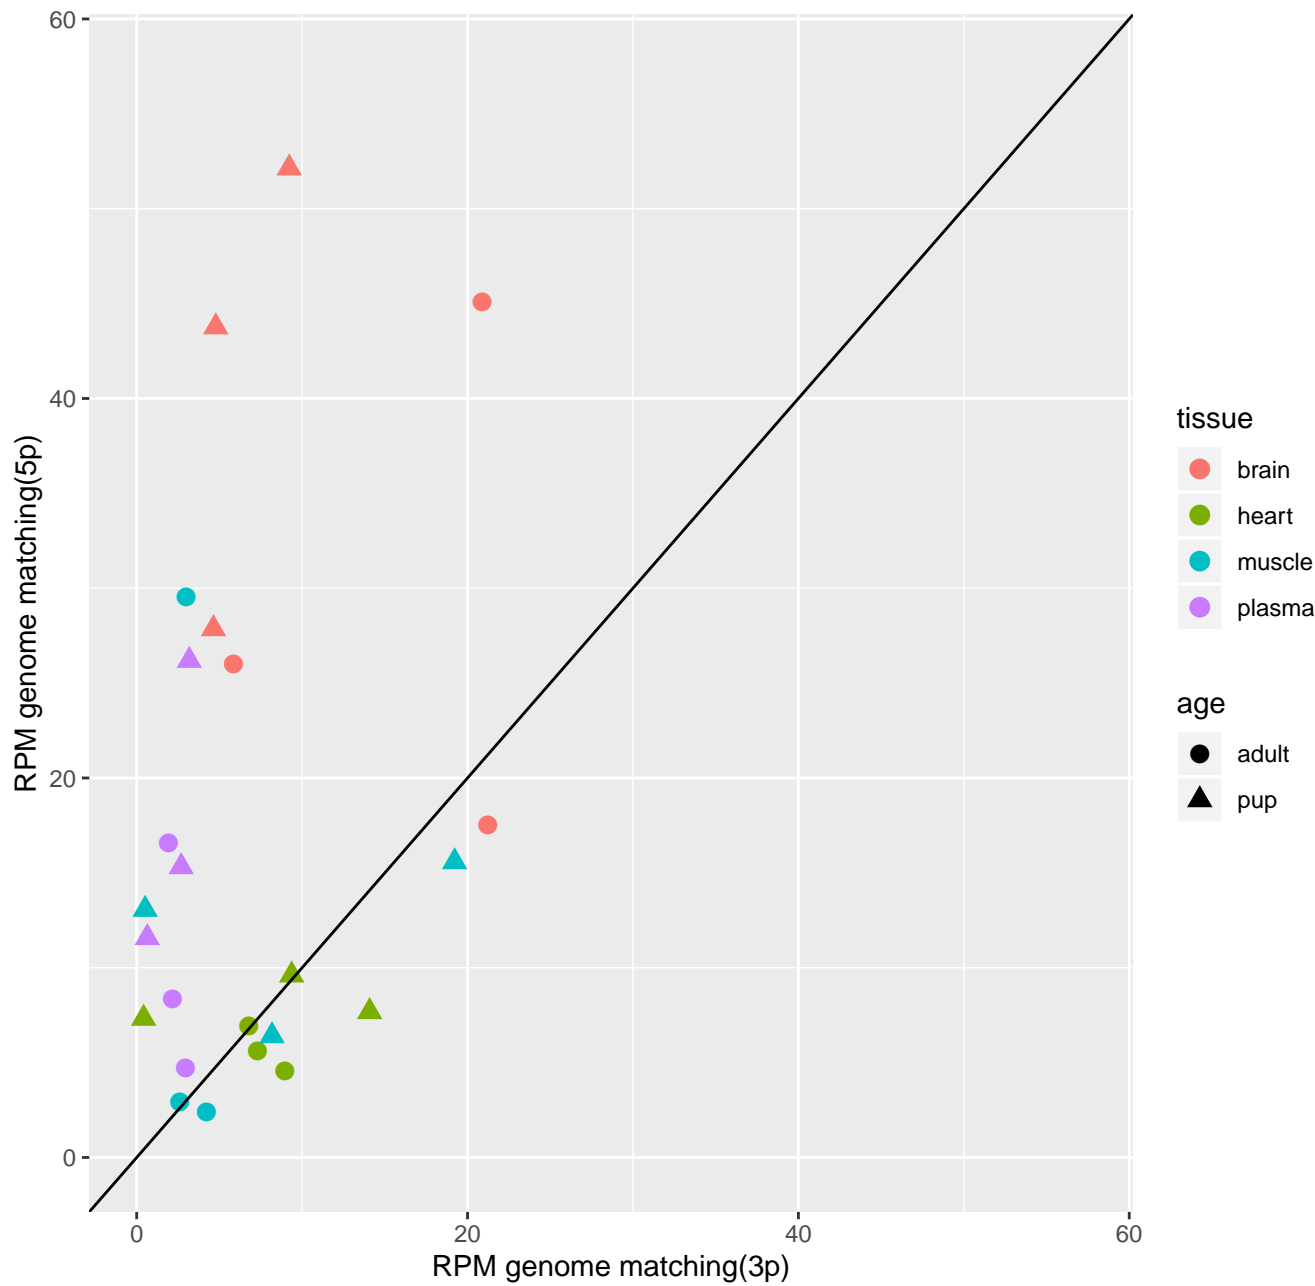

# lwe-miR-124a\_loc3

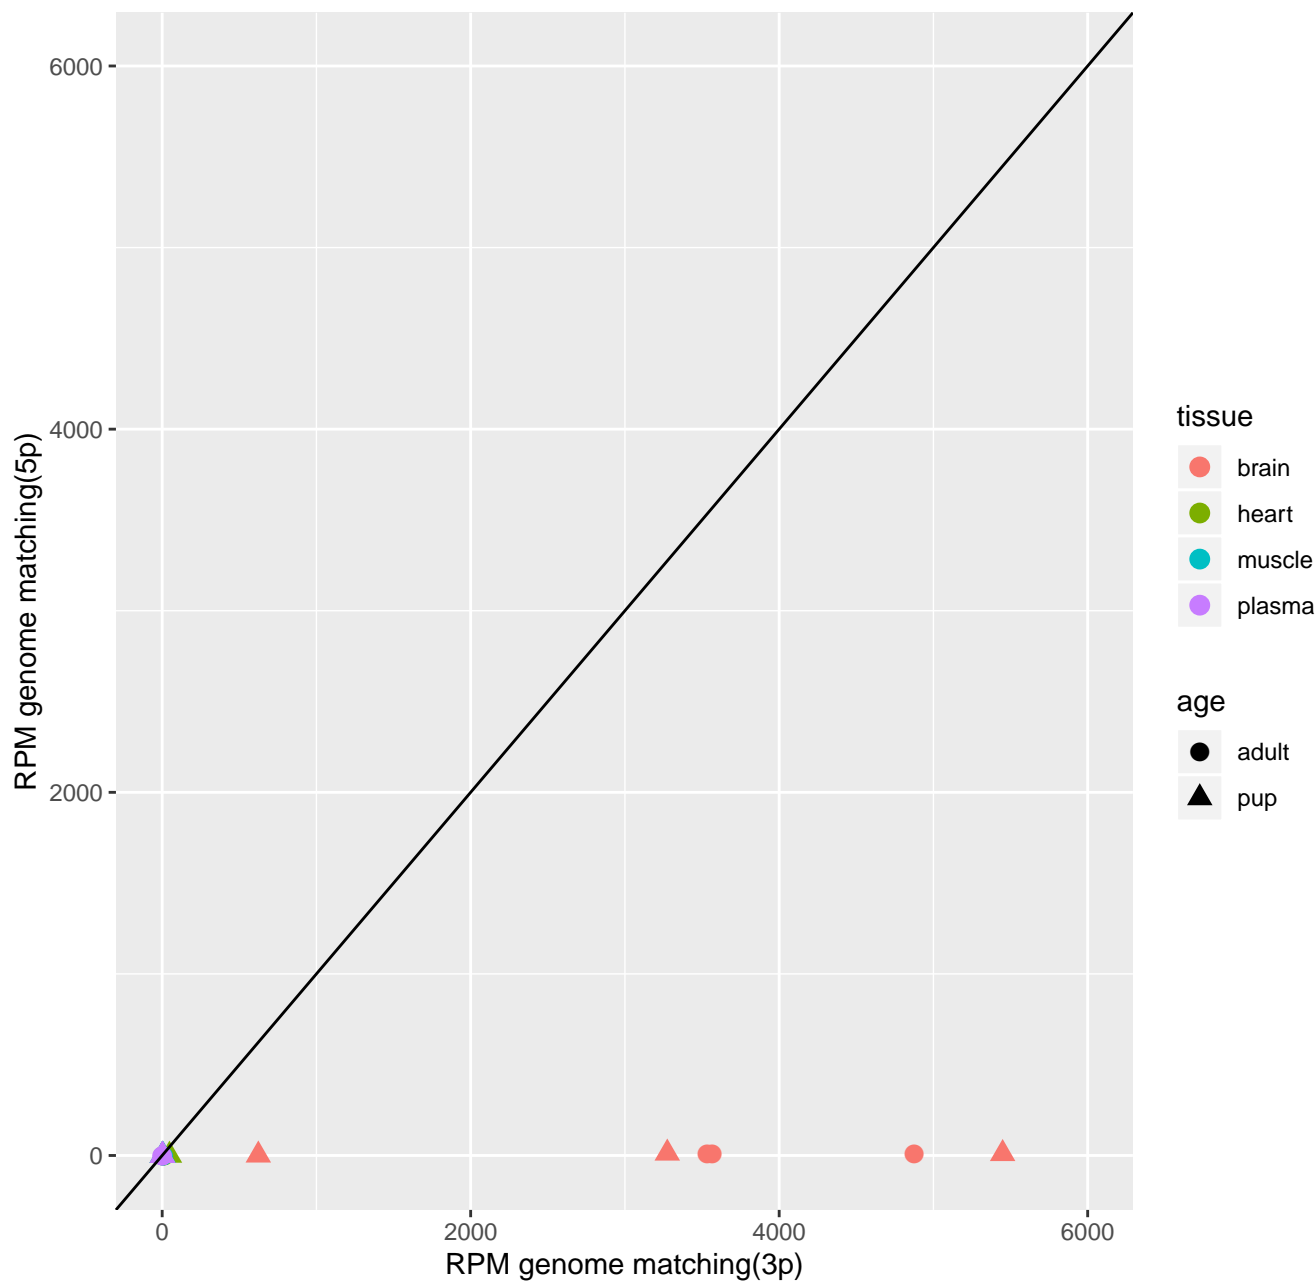

novel\_127

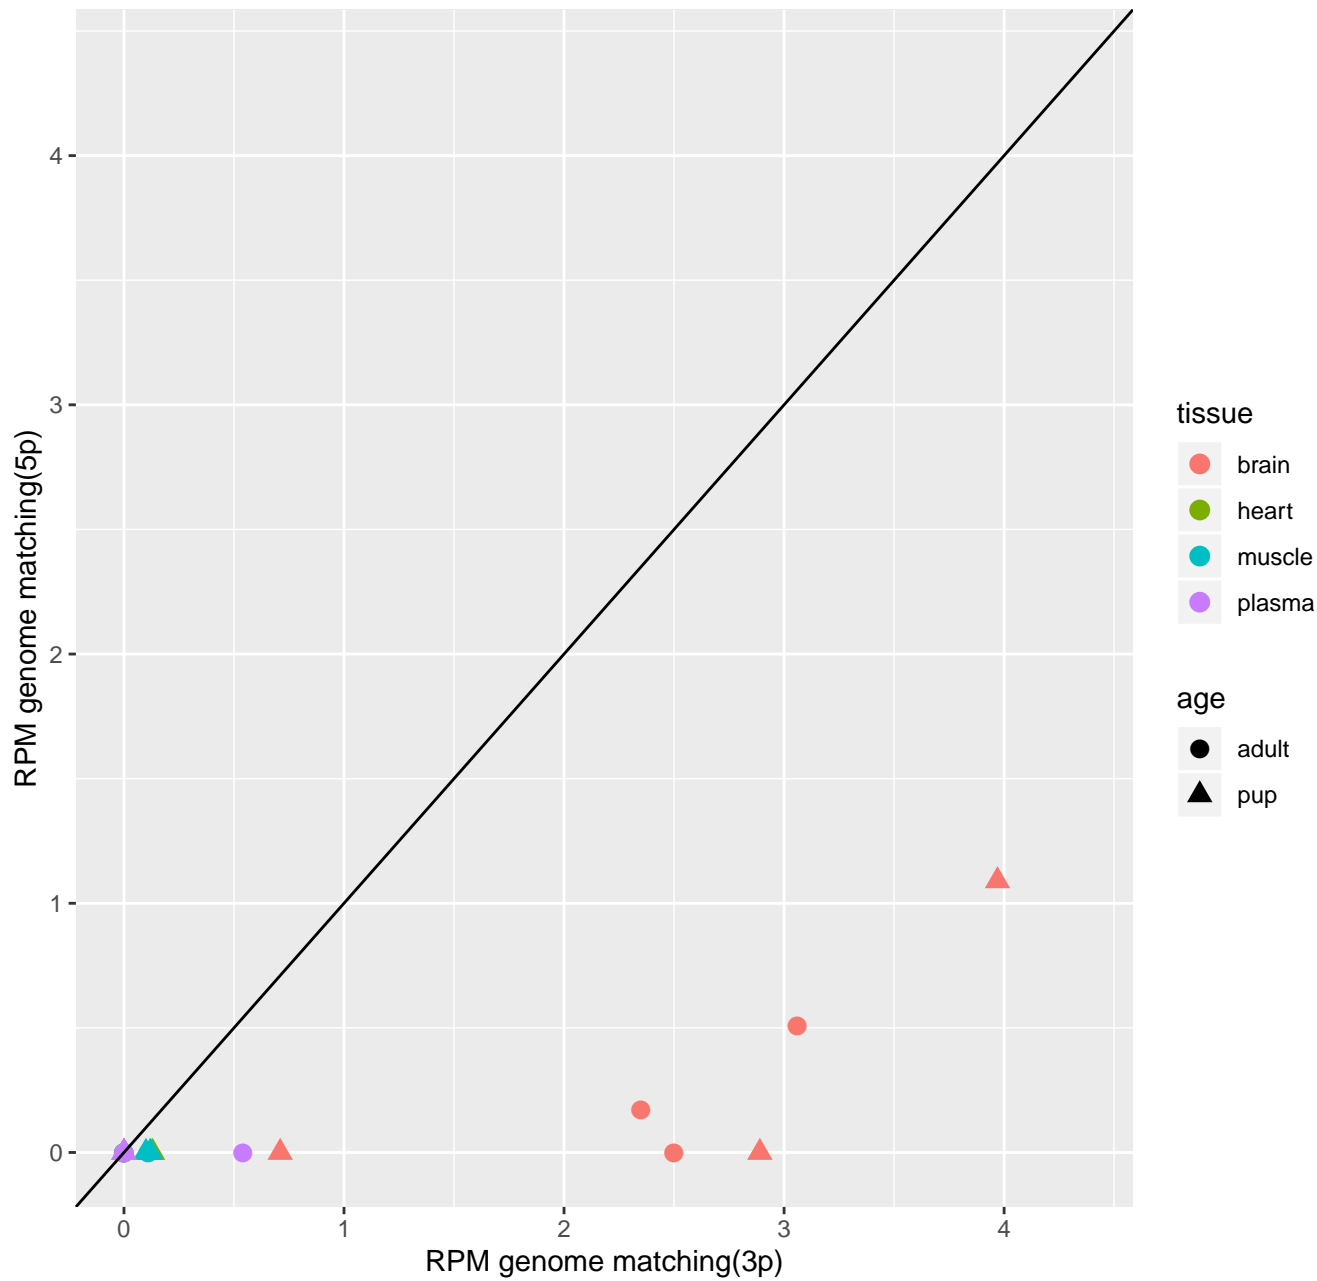

## lwe-miR-181d\_loc1

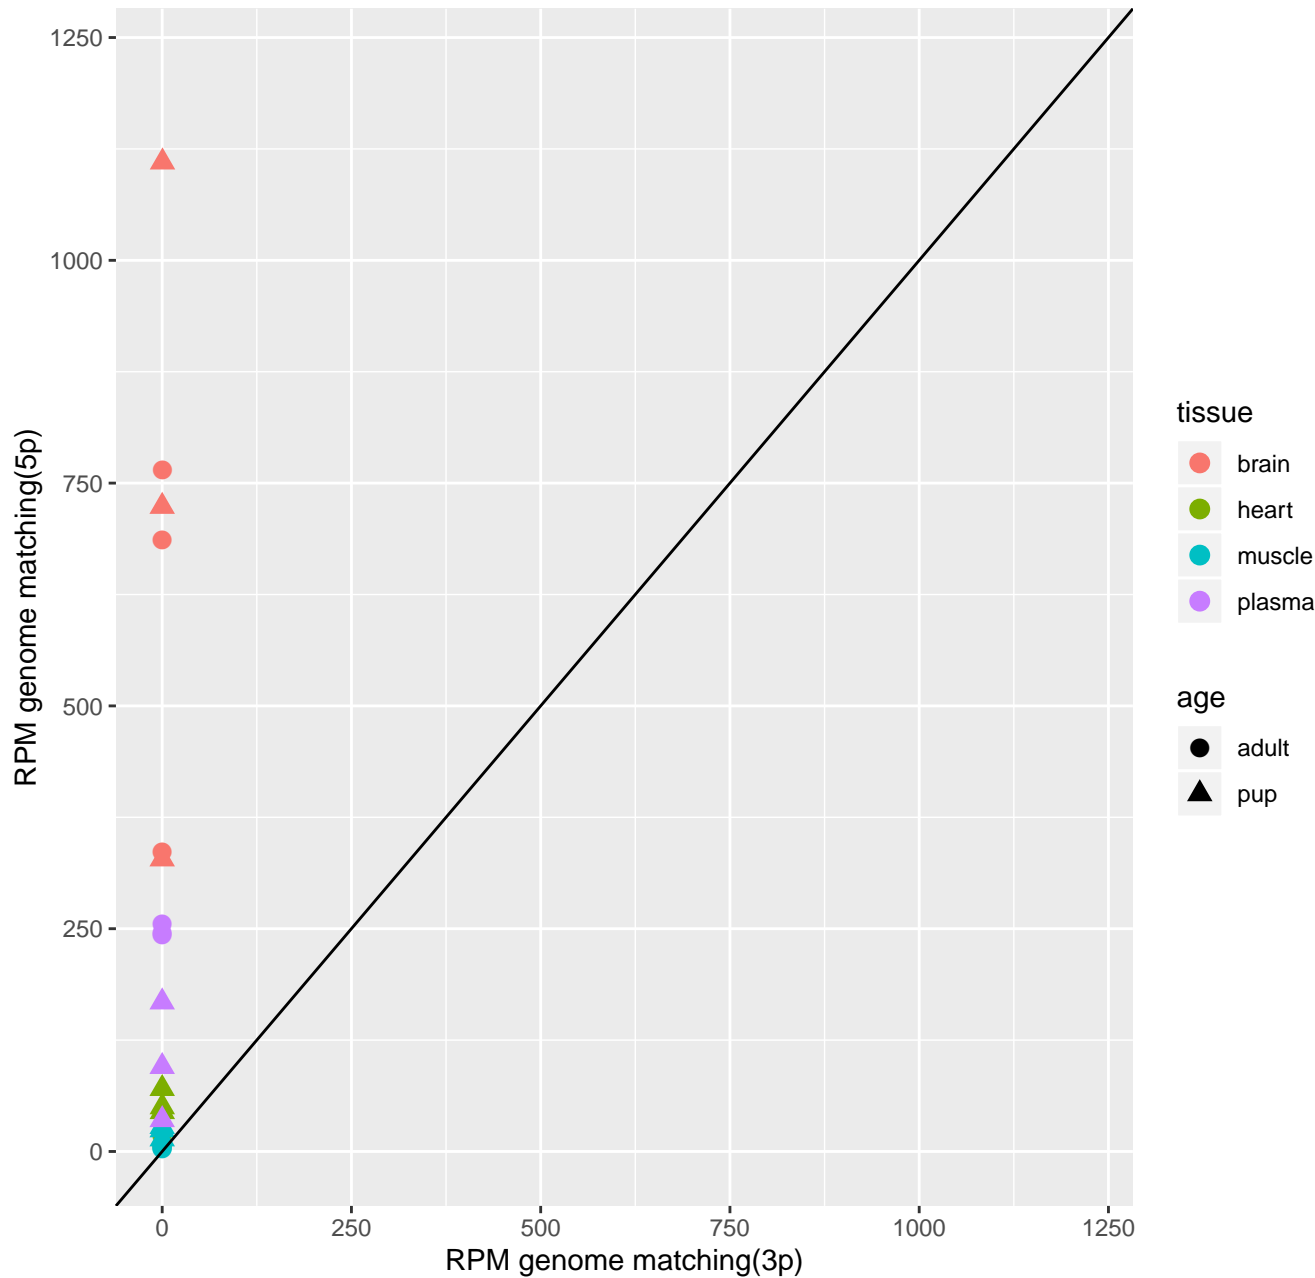

## lwe-miR-181a\_loc3

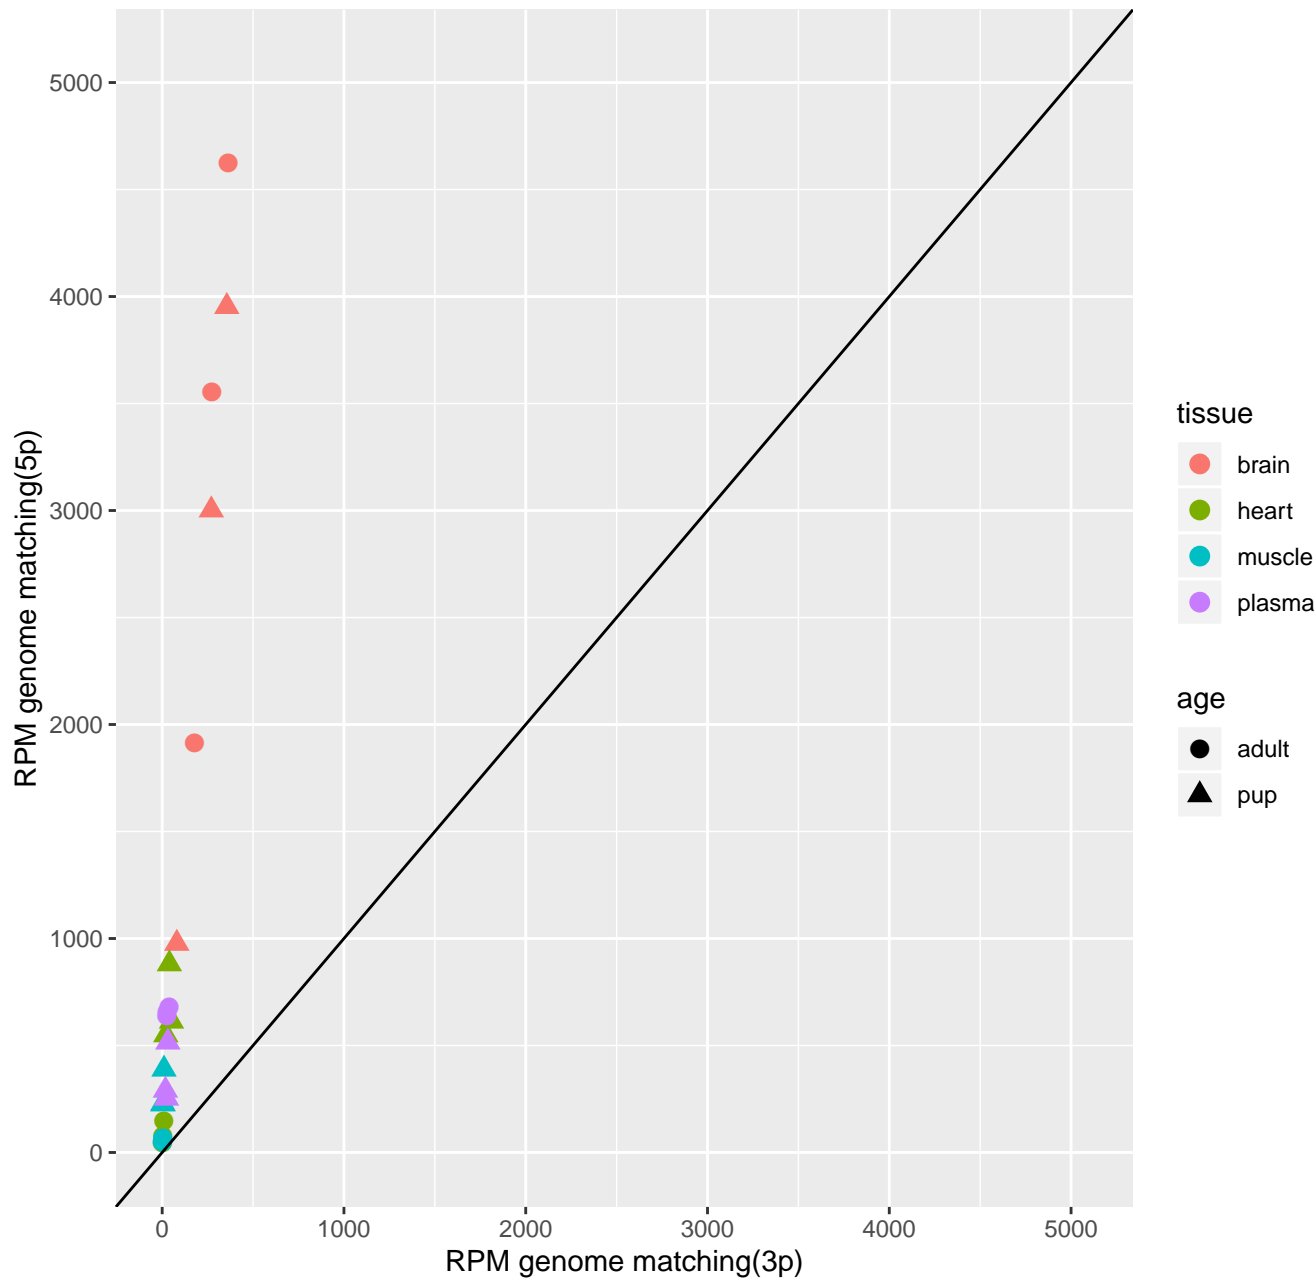

## novel\_128

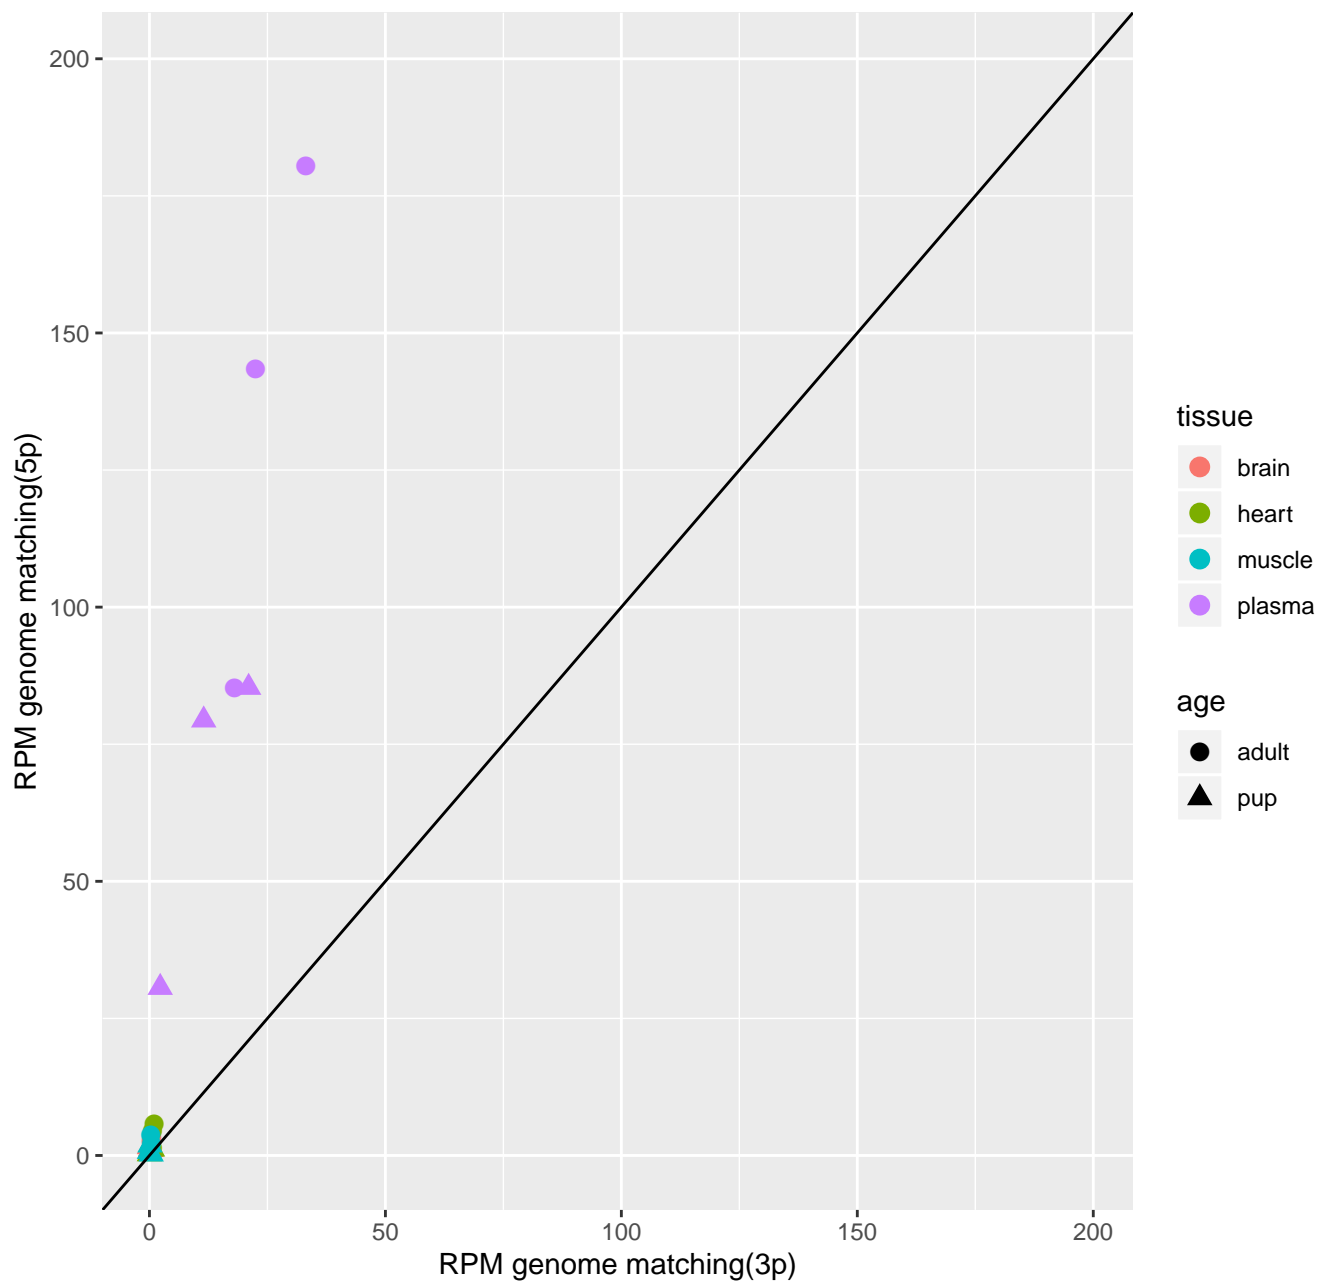



## lwe-miR-149\_loc1

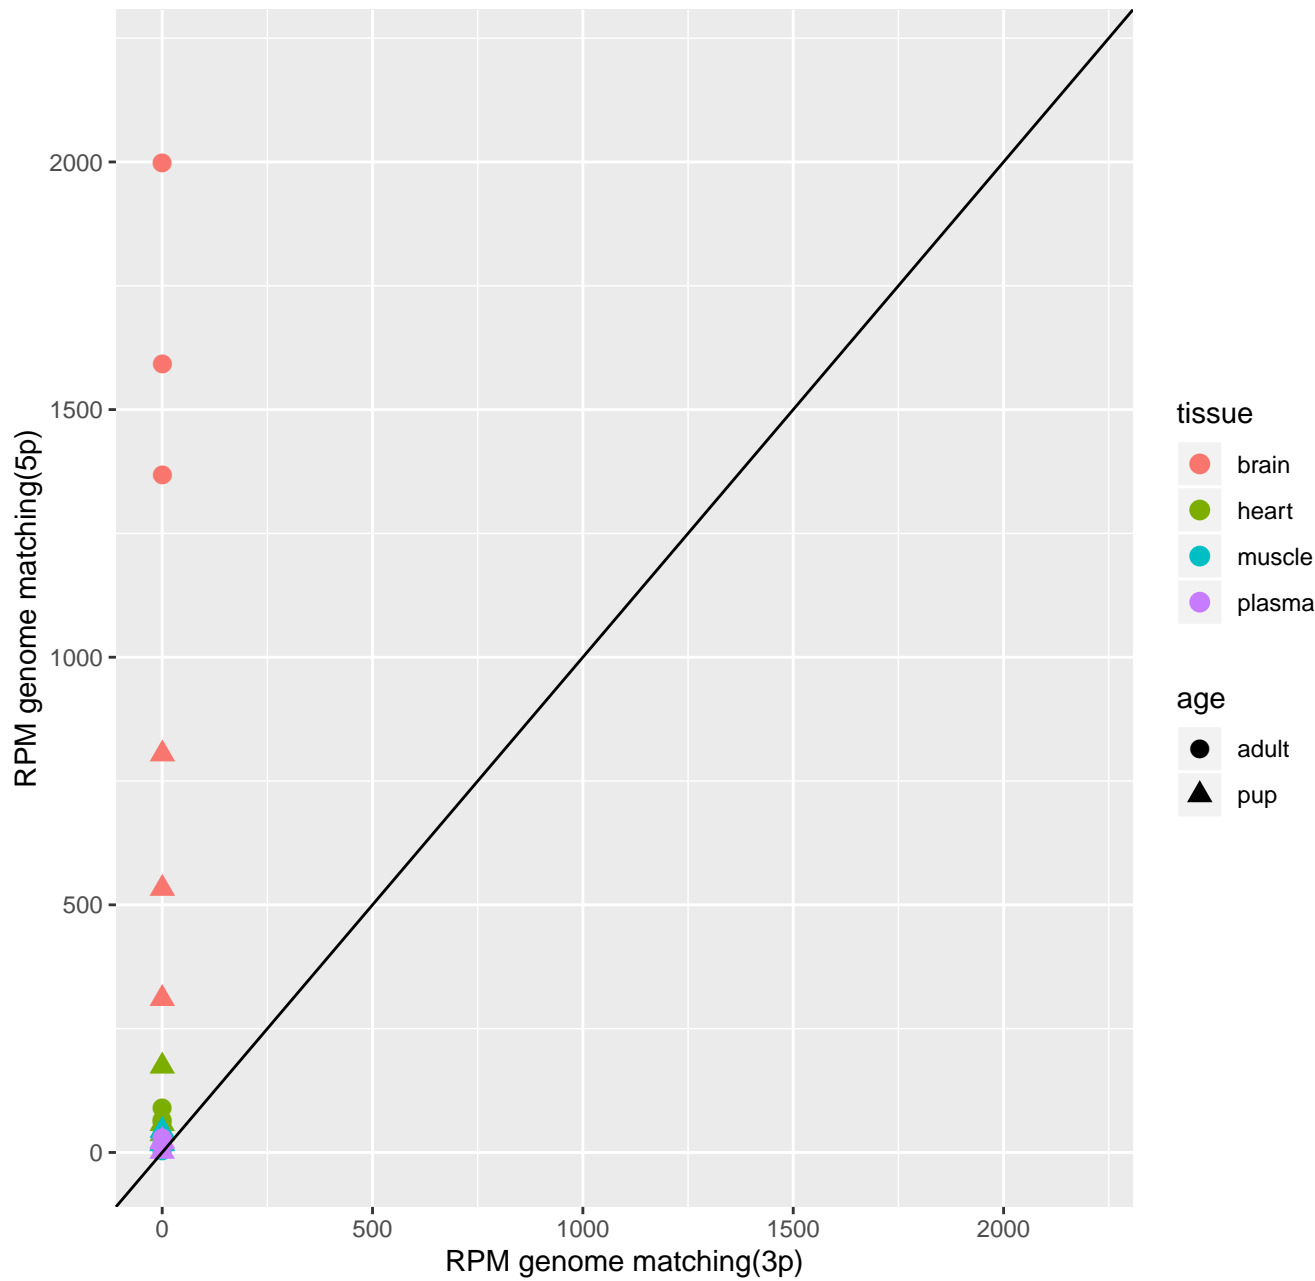

## novel\_129

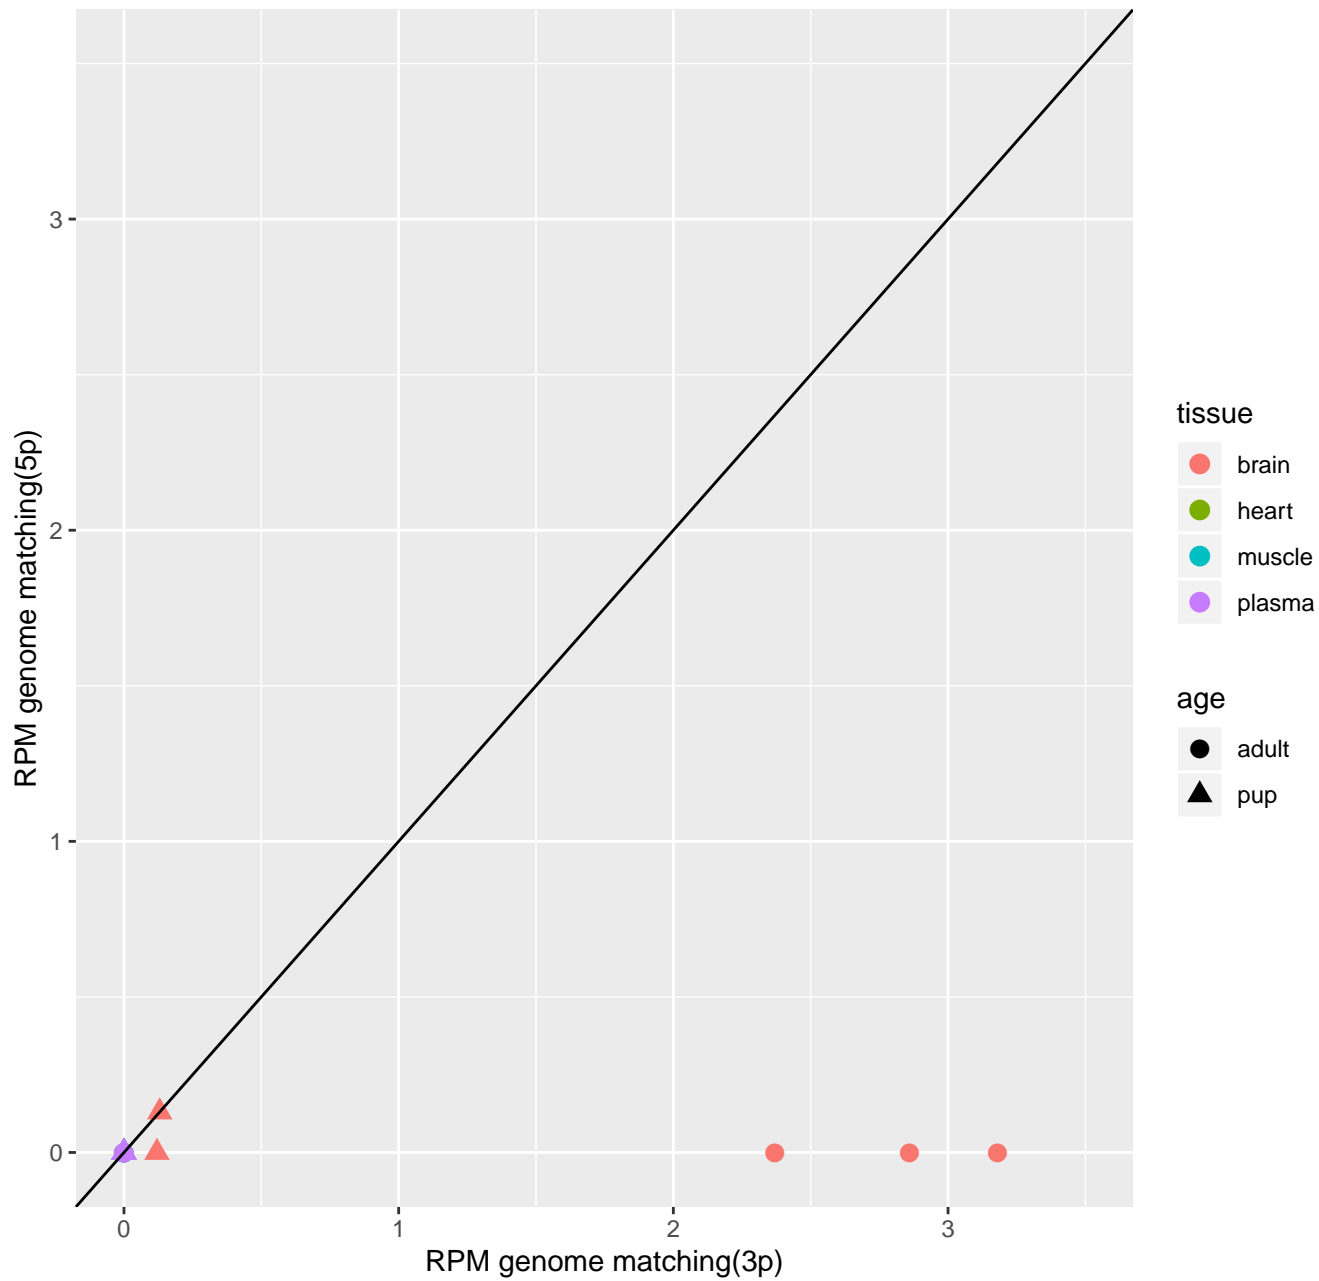

## novel\_131

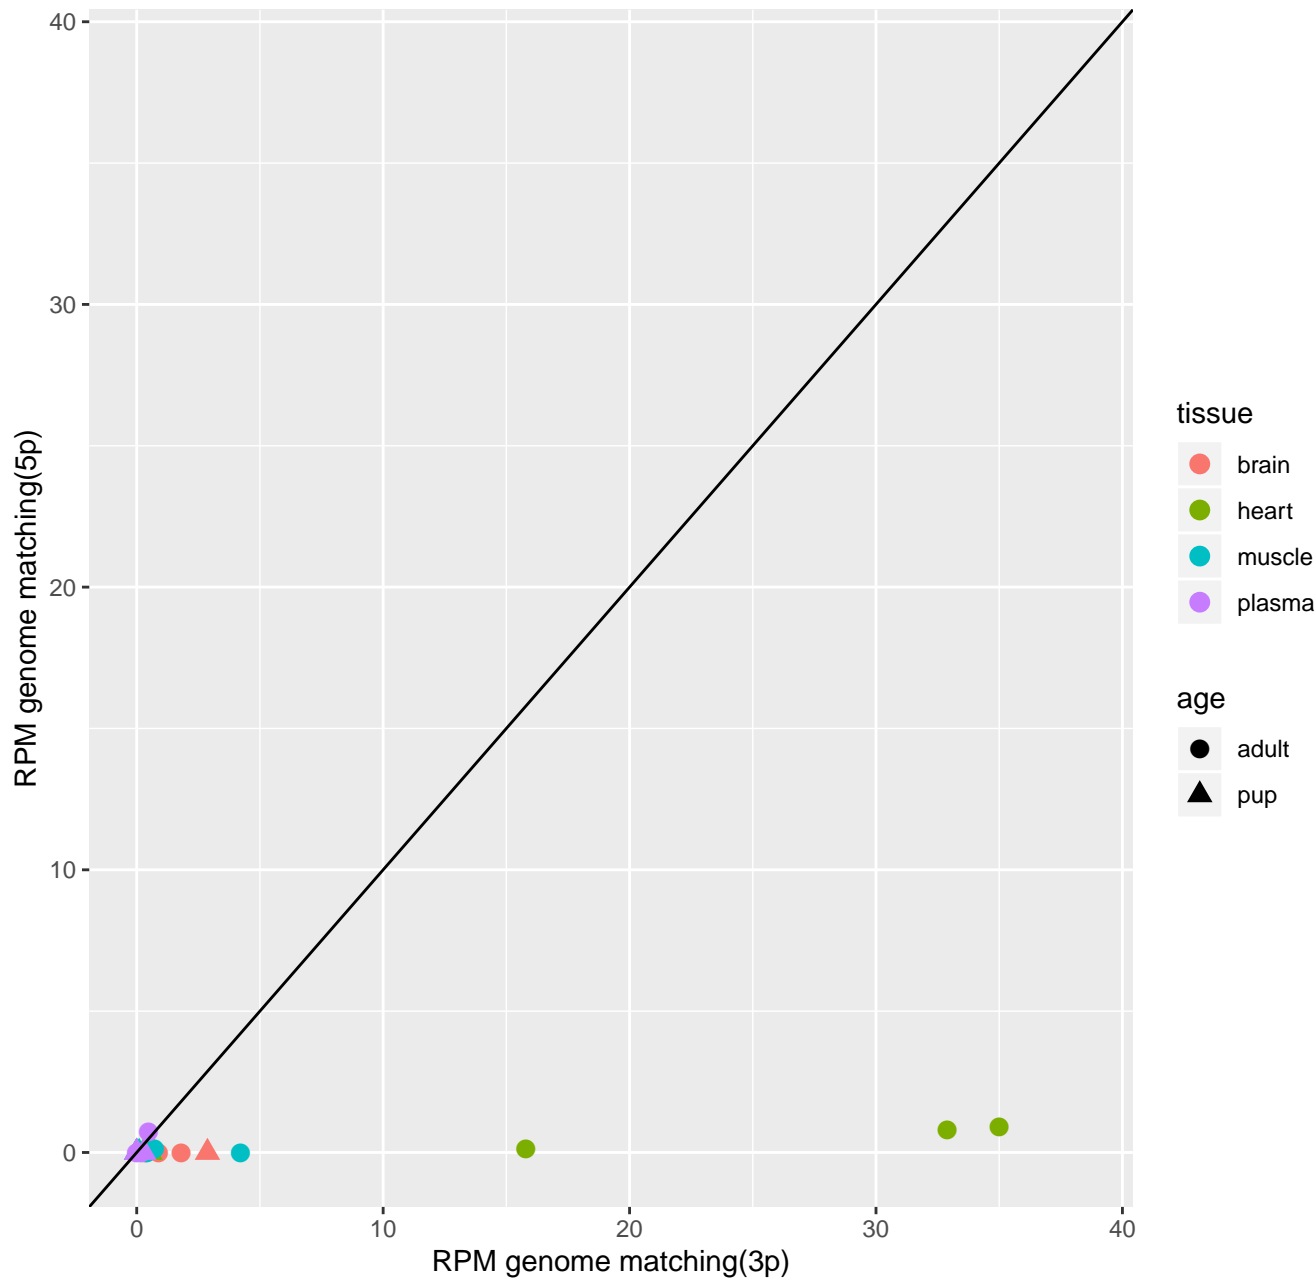

## novel\_132

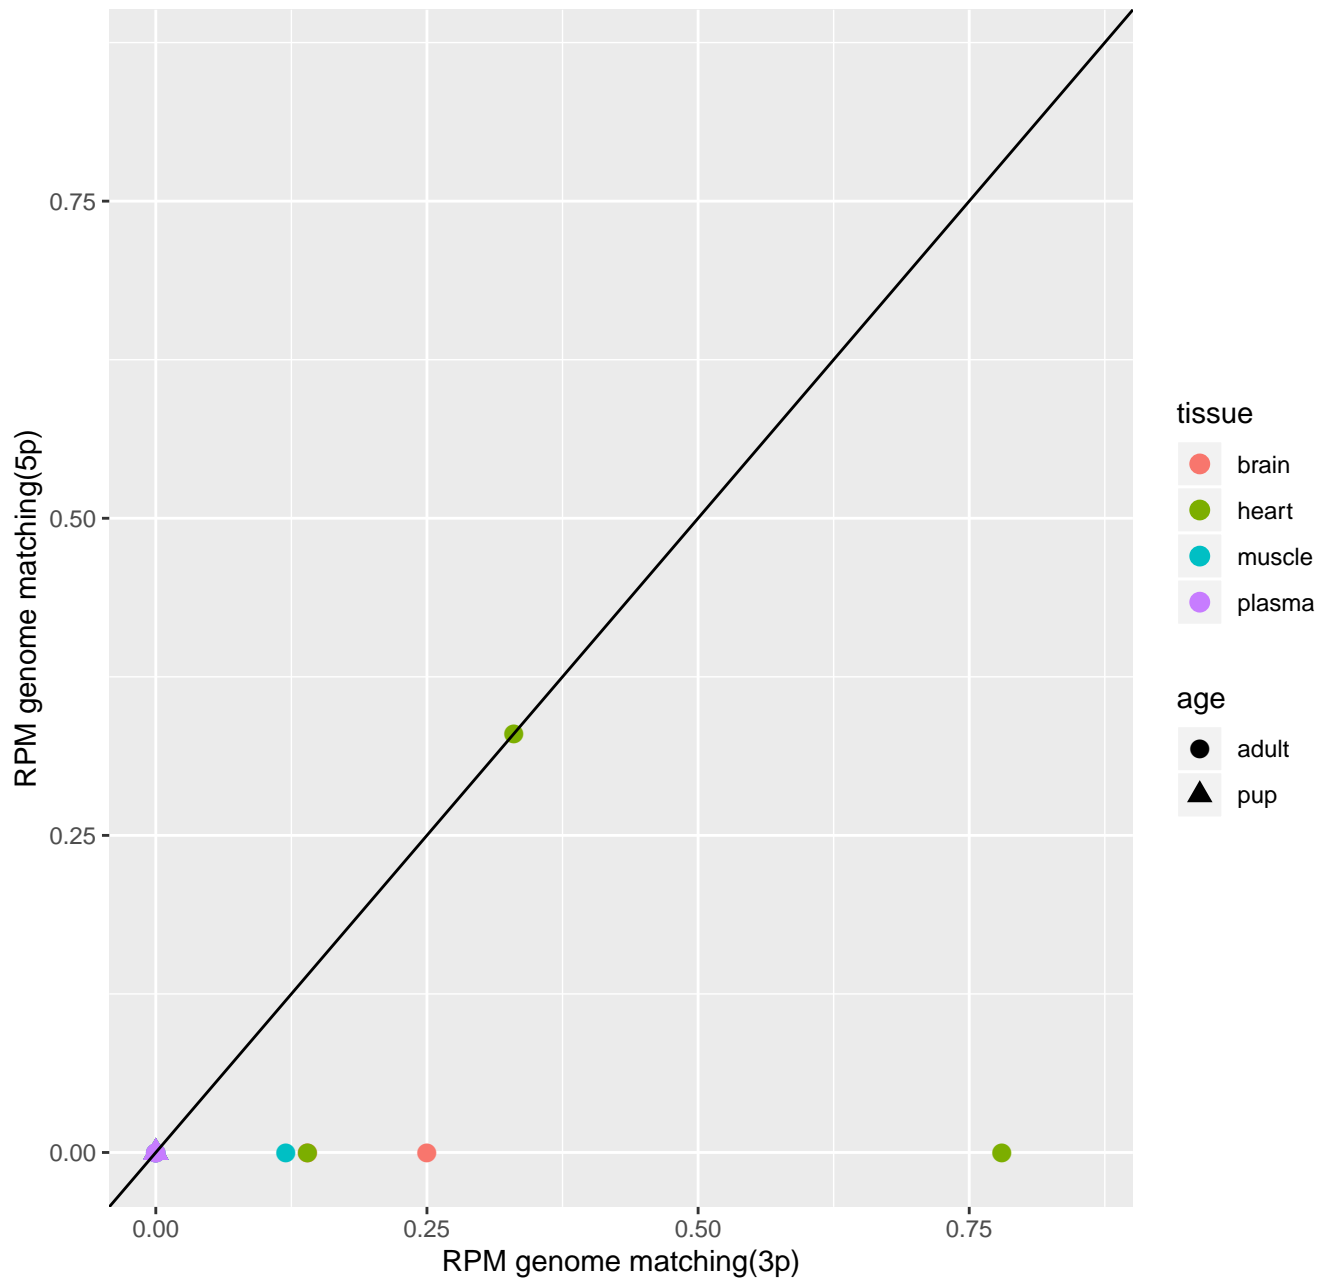

## novel\_133

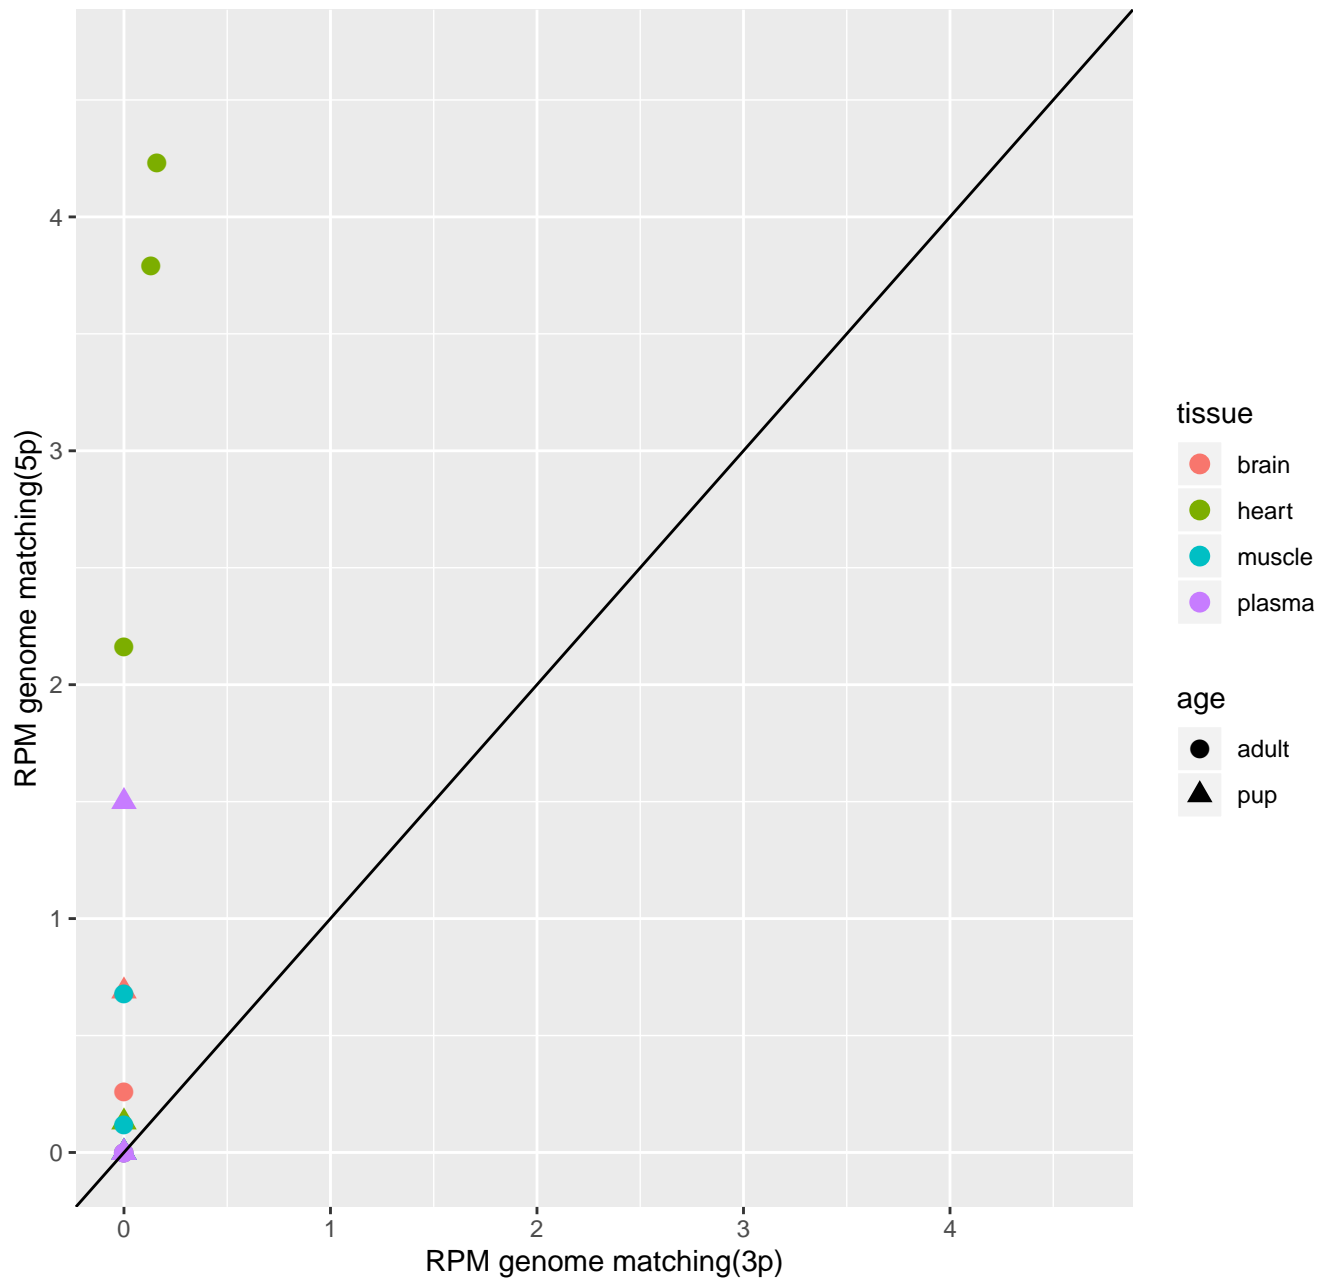

## novel\_130

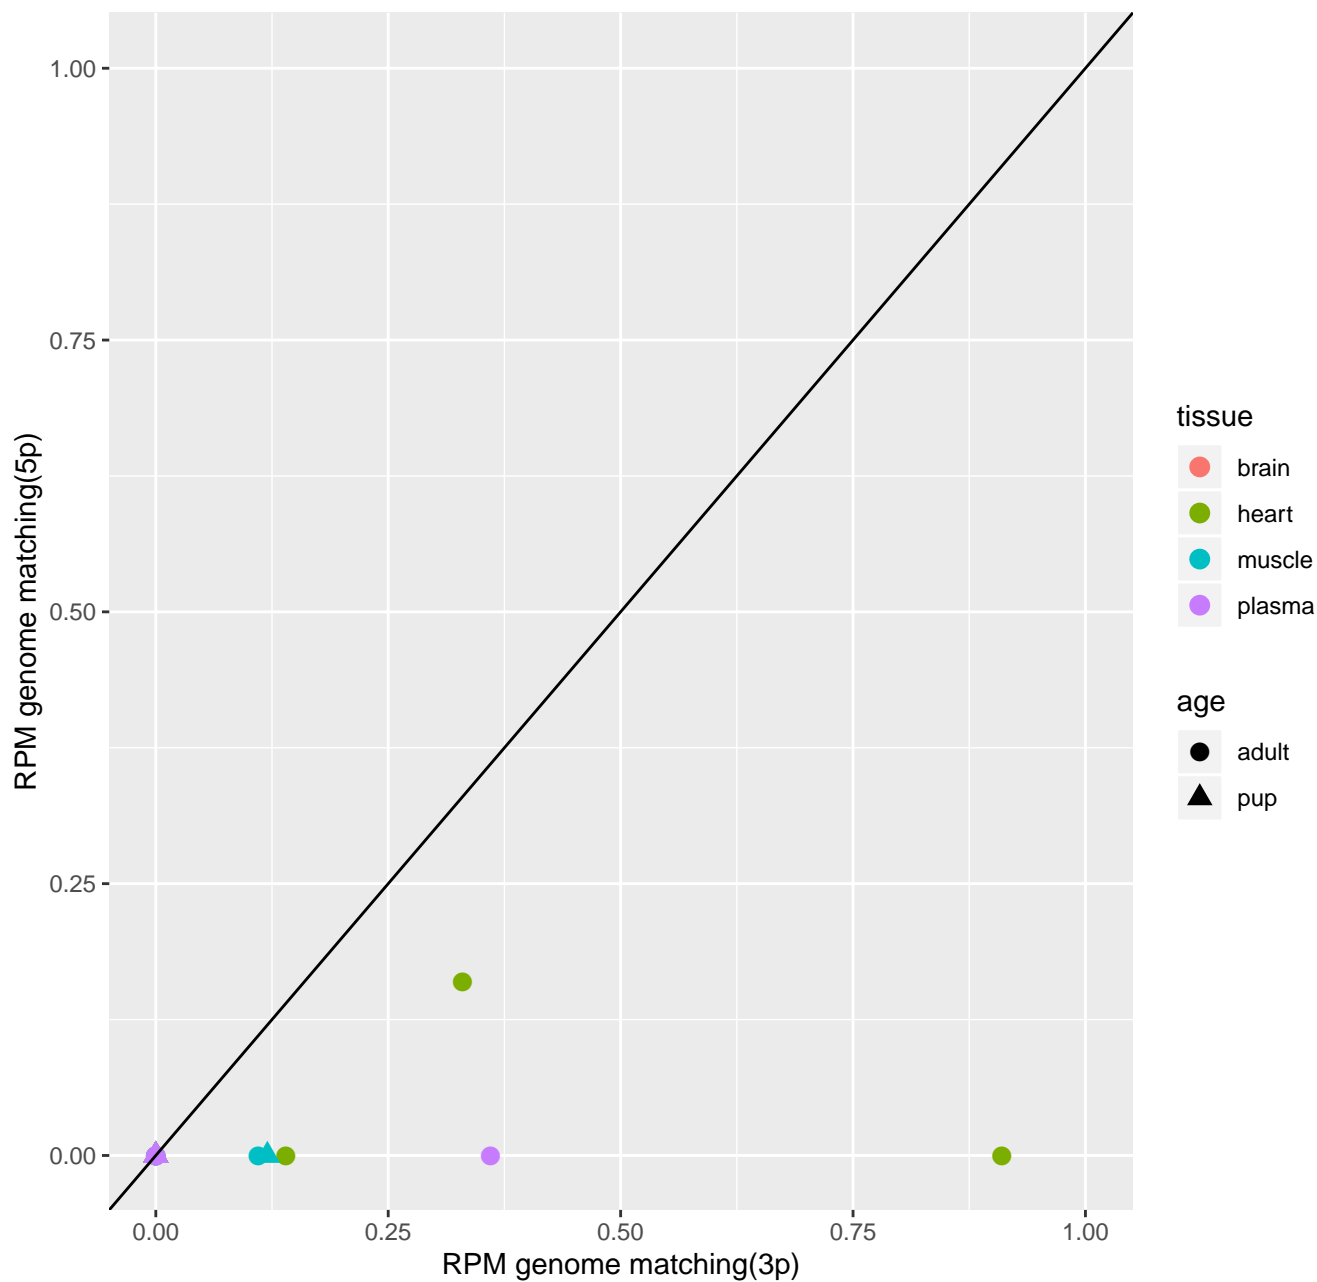

## novel\_134

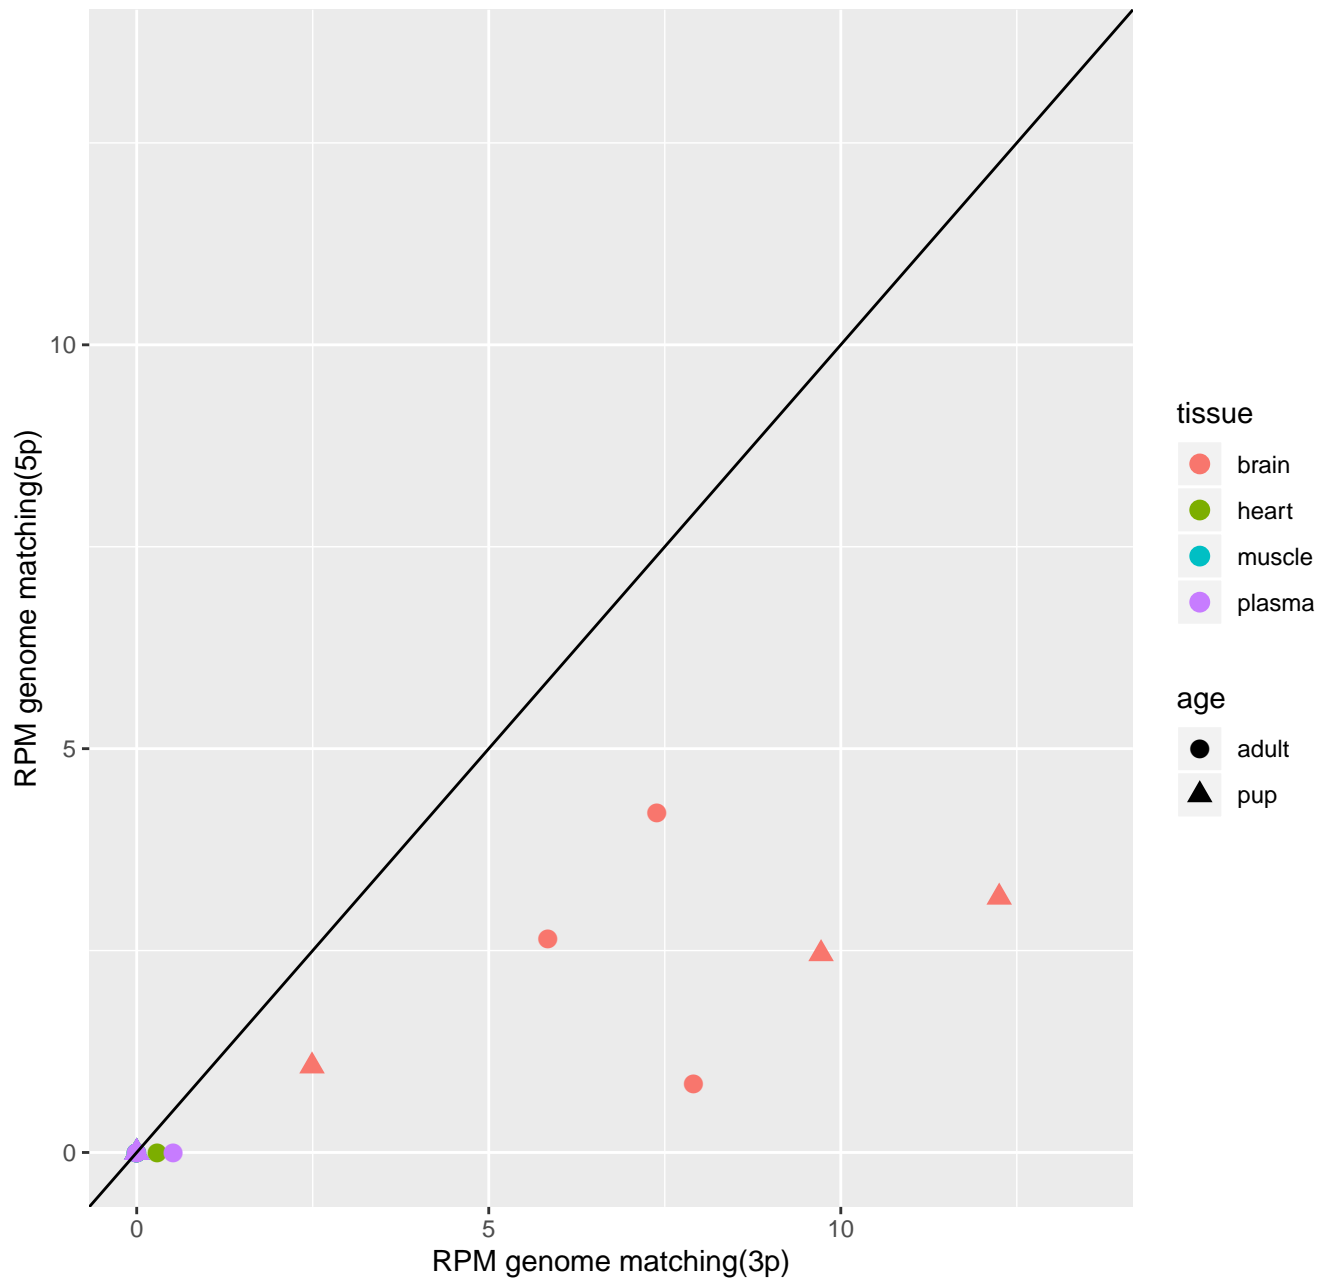

## lwe-miR-3069\_loc1

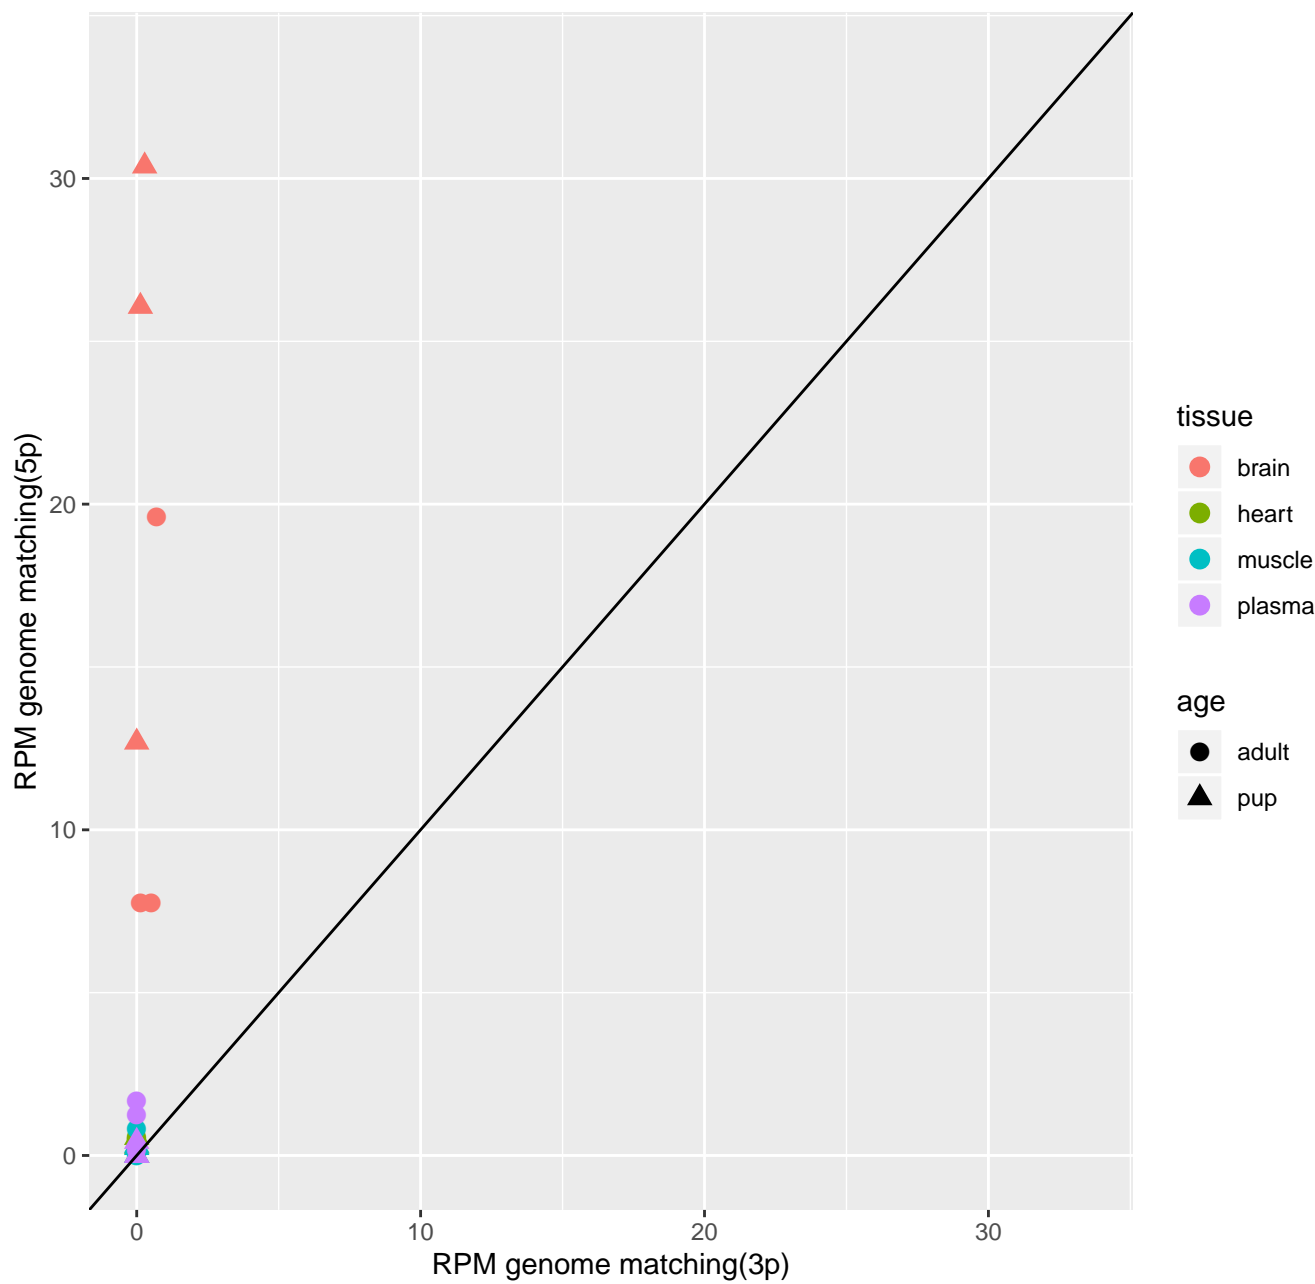



## novel\_136

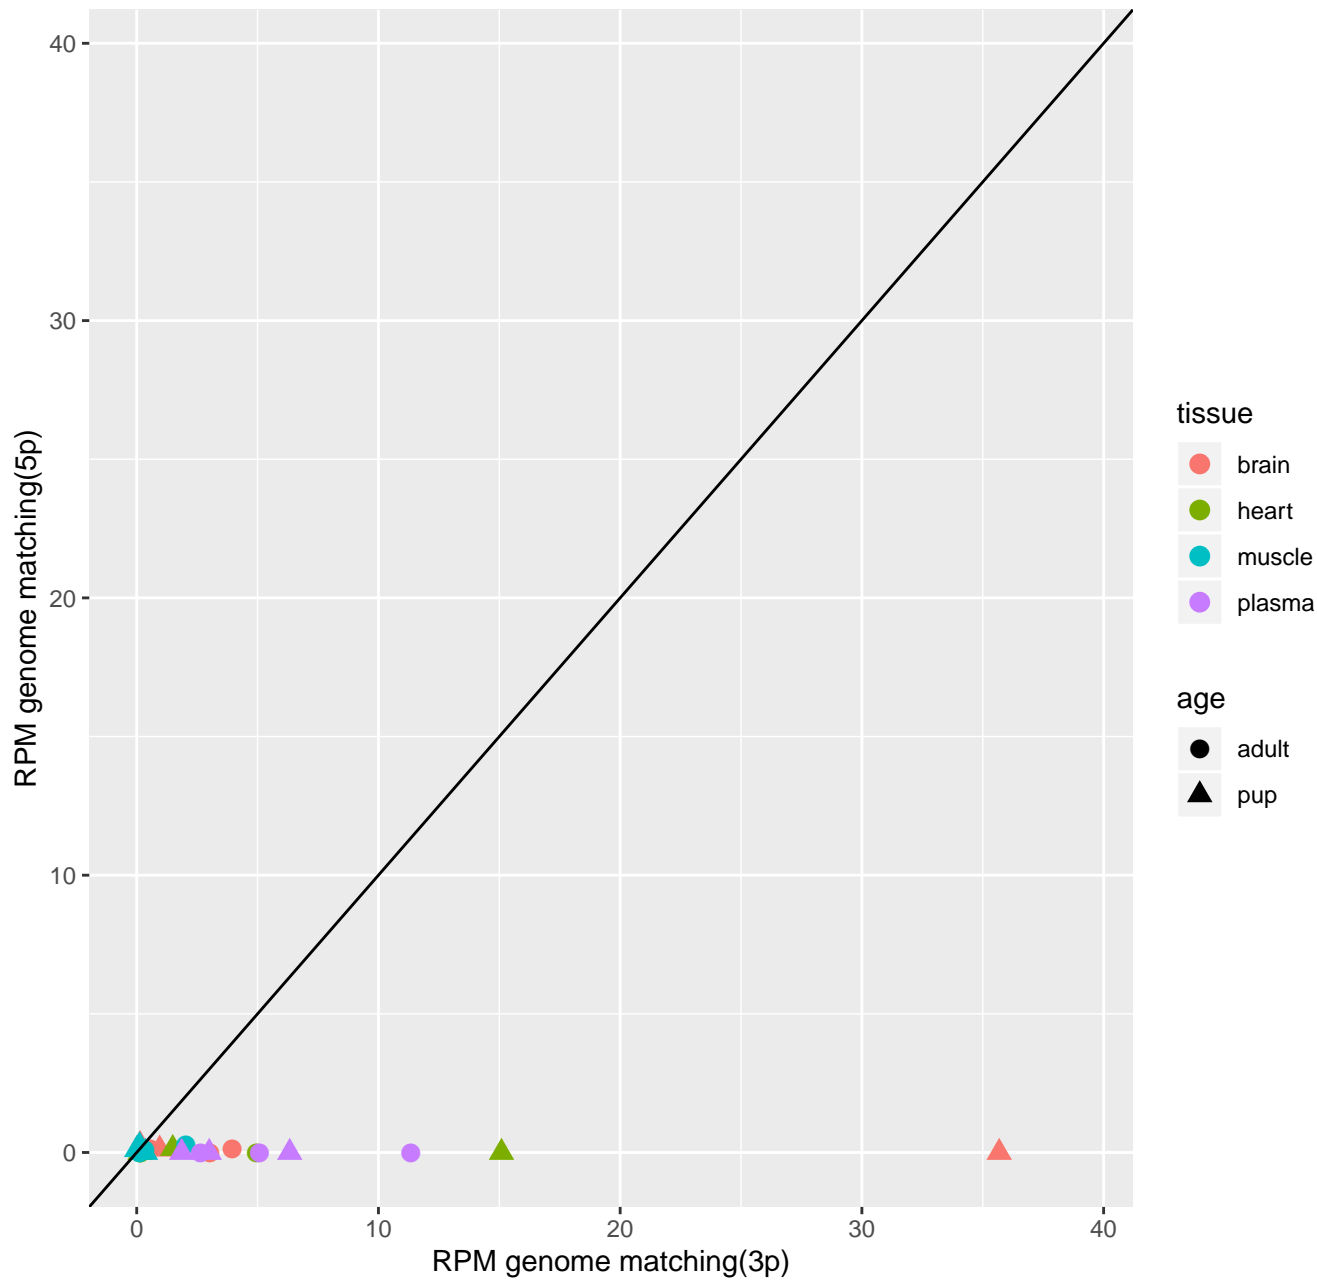

## novel\_137

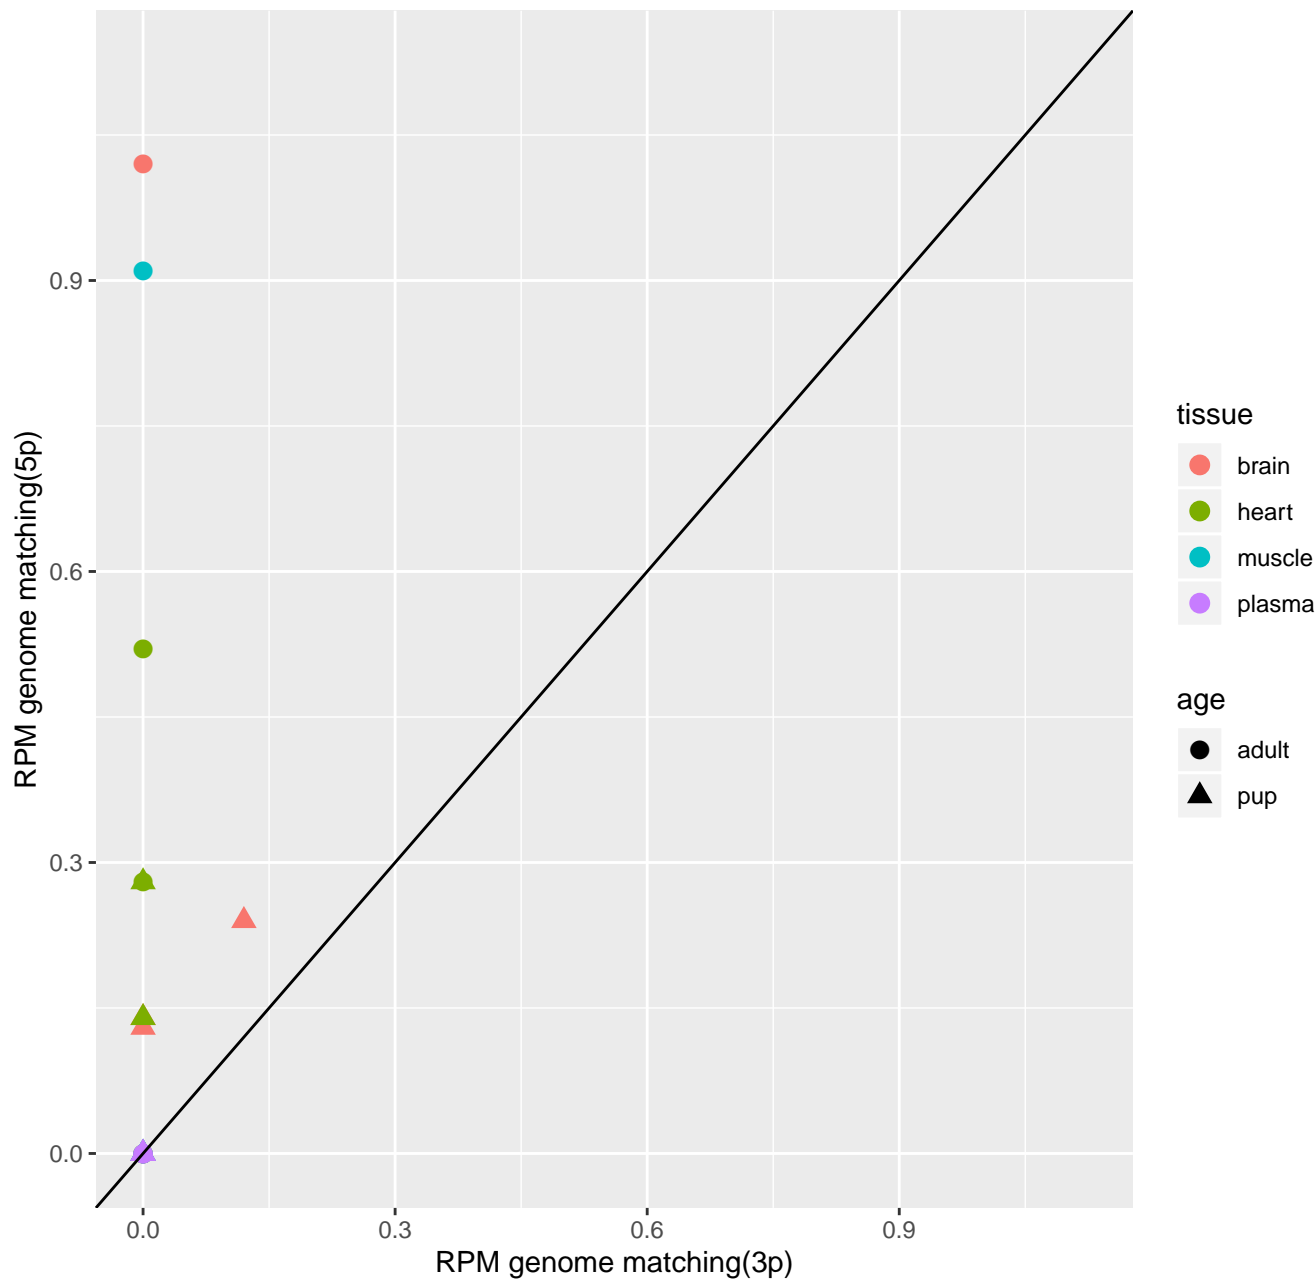

## novel\_138

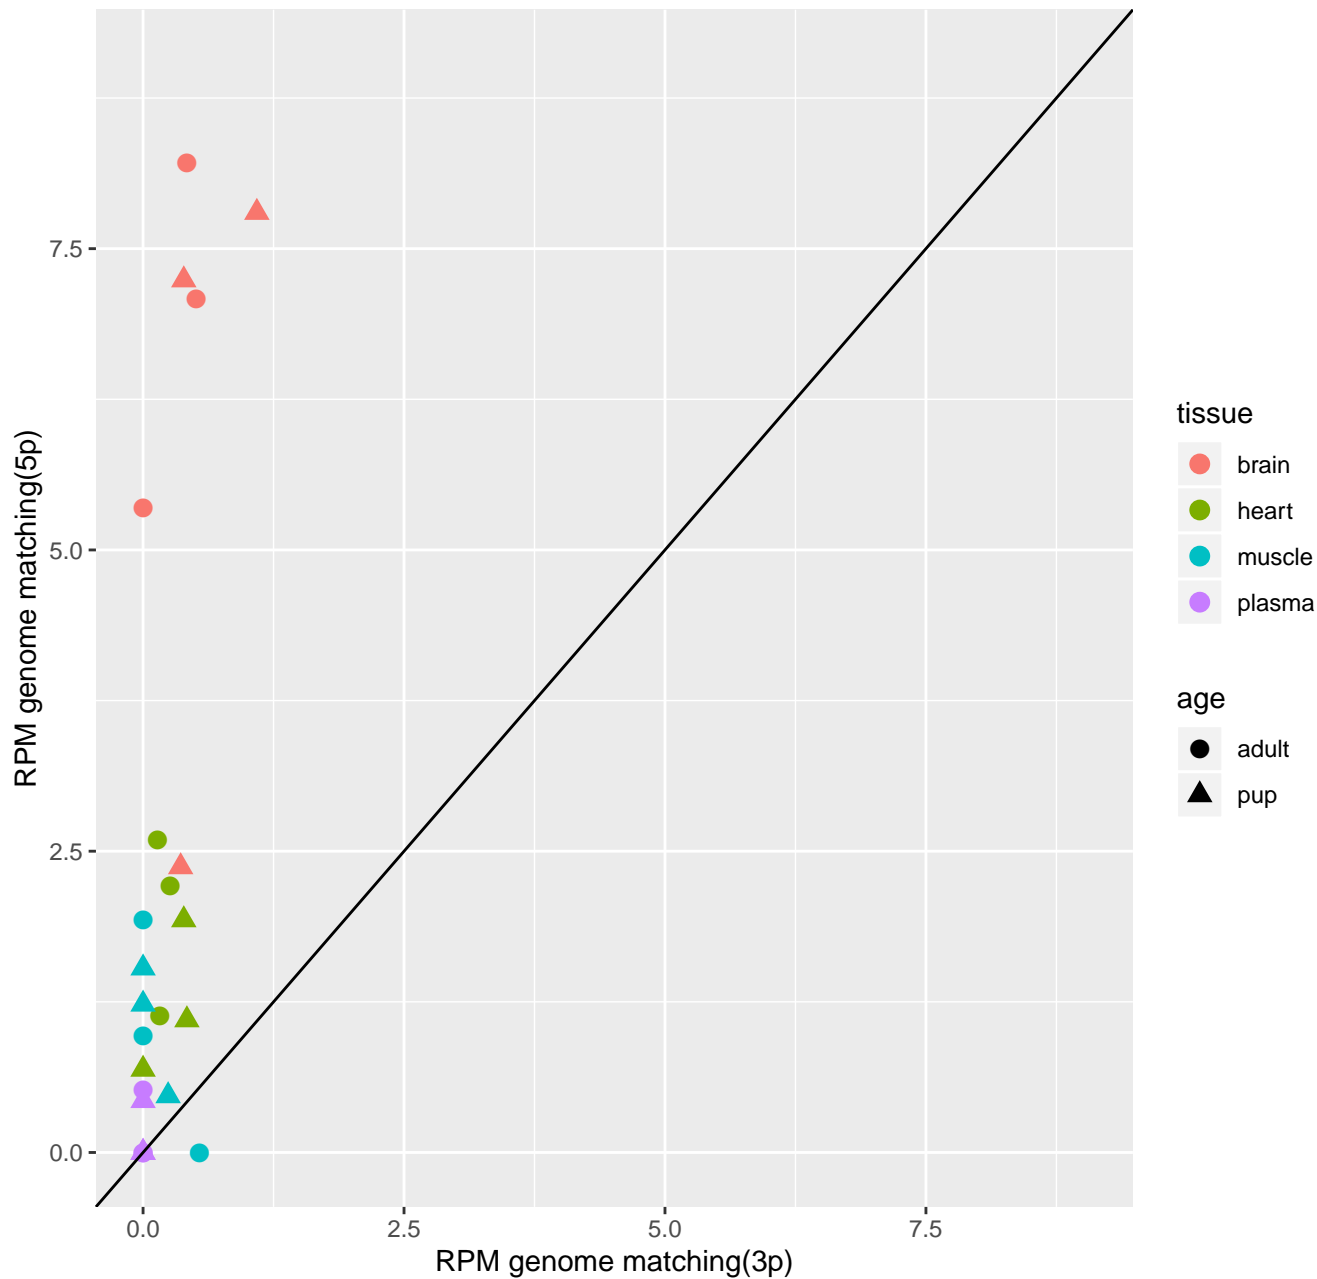

# lwe-miR-200b\_loc1

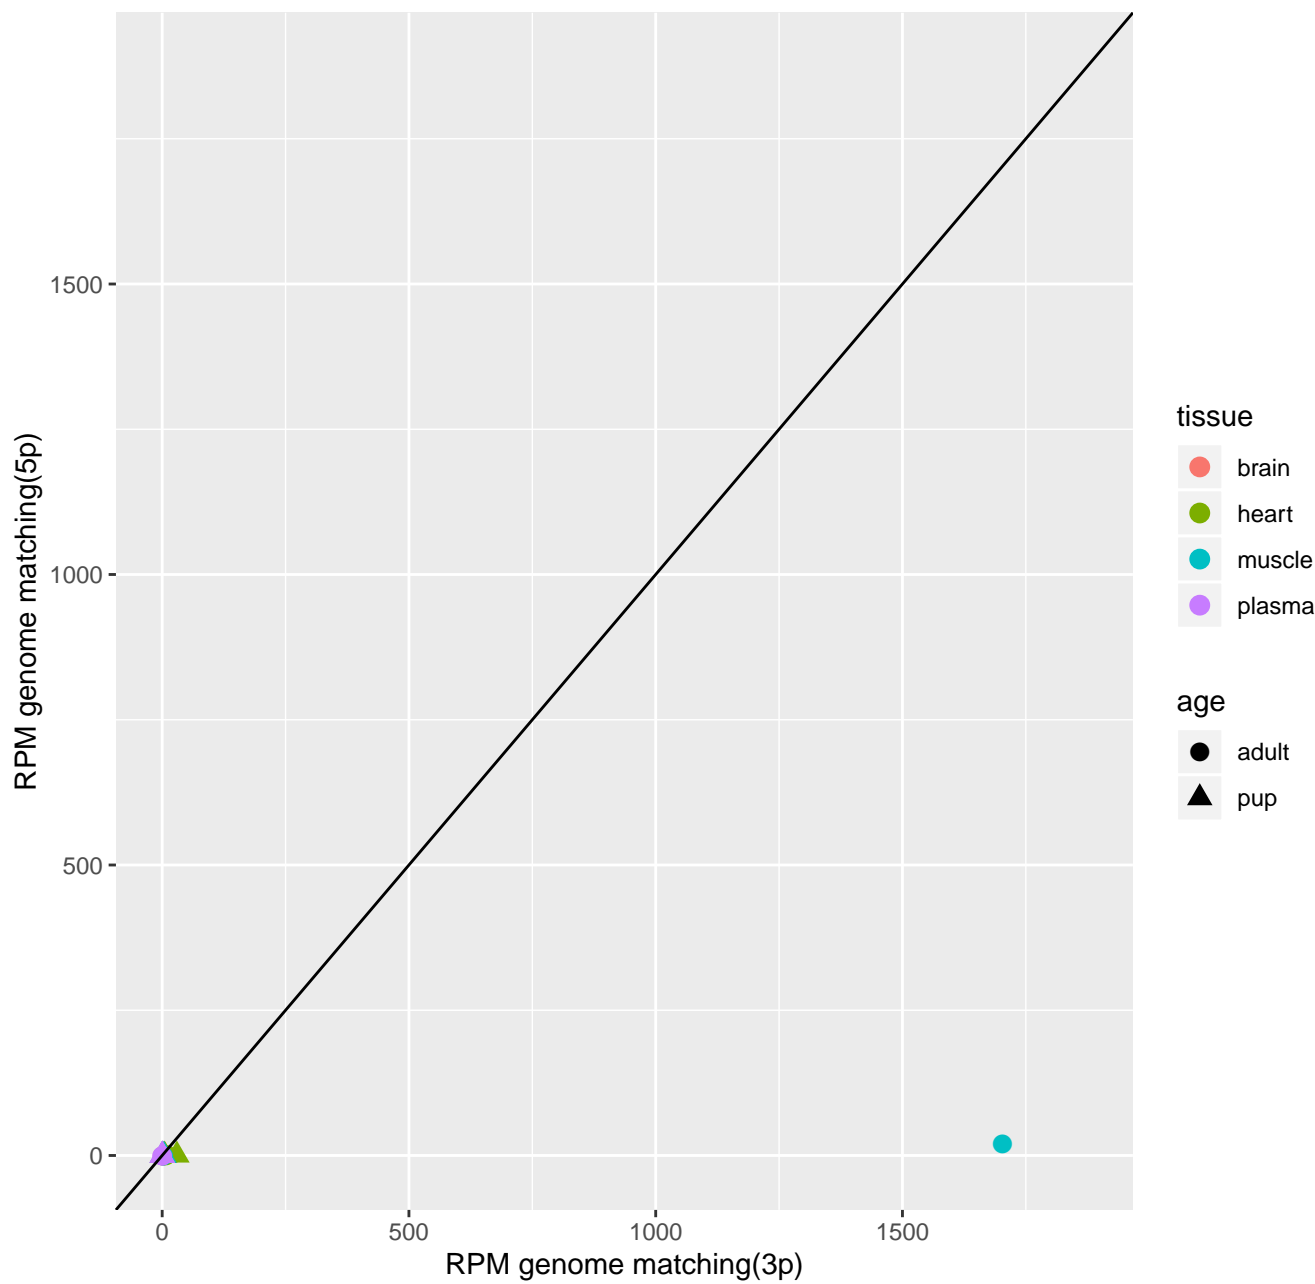



## let-7a\_loc1

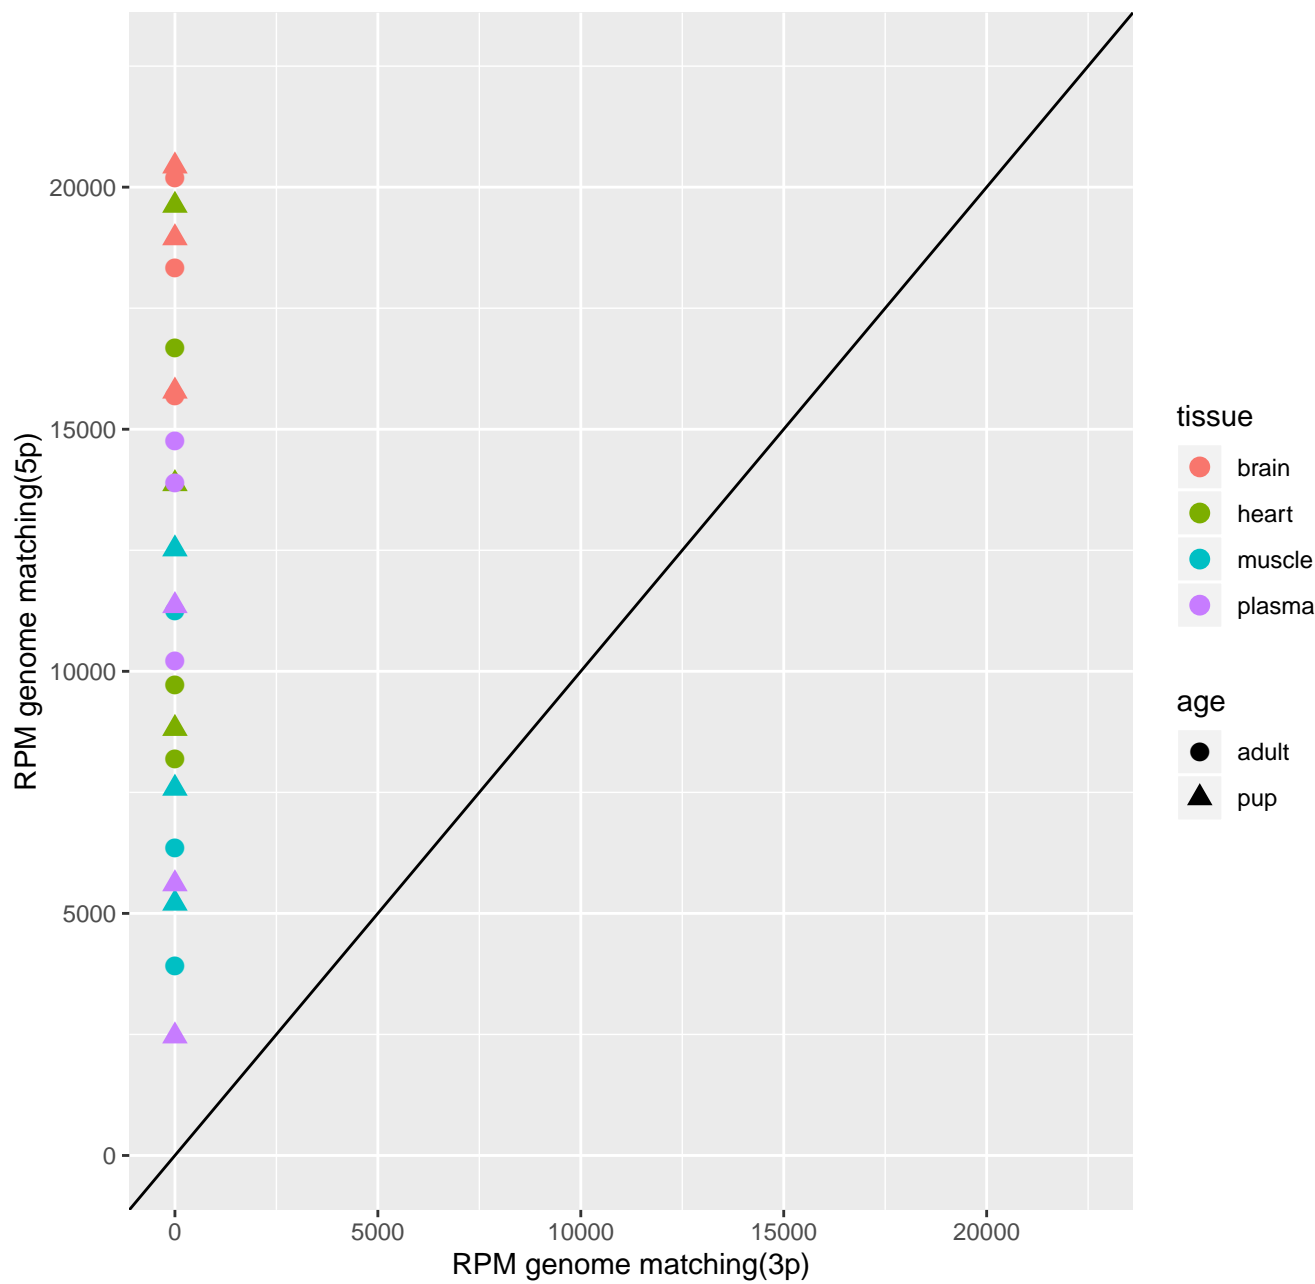

# lwe-miR-191a\_loc1

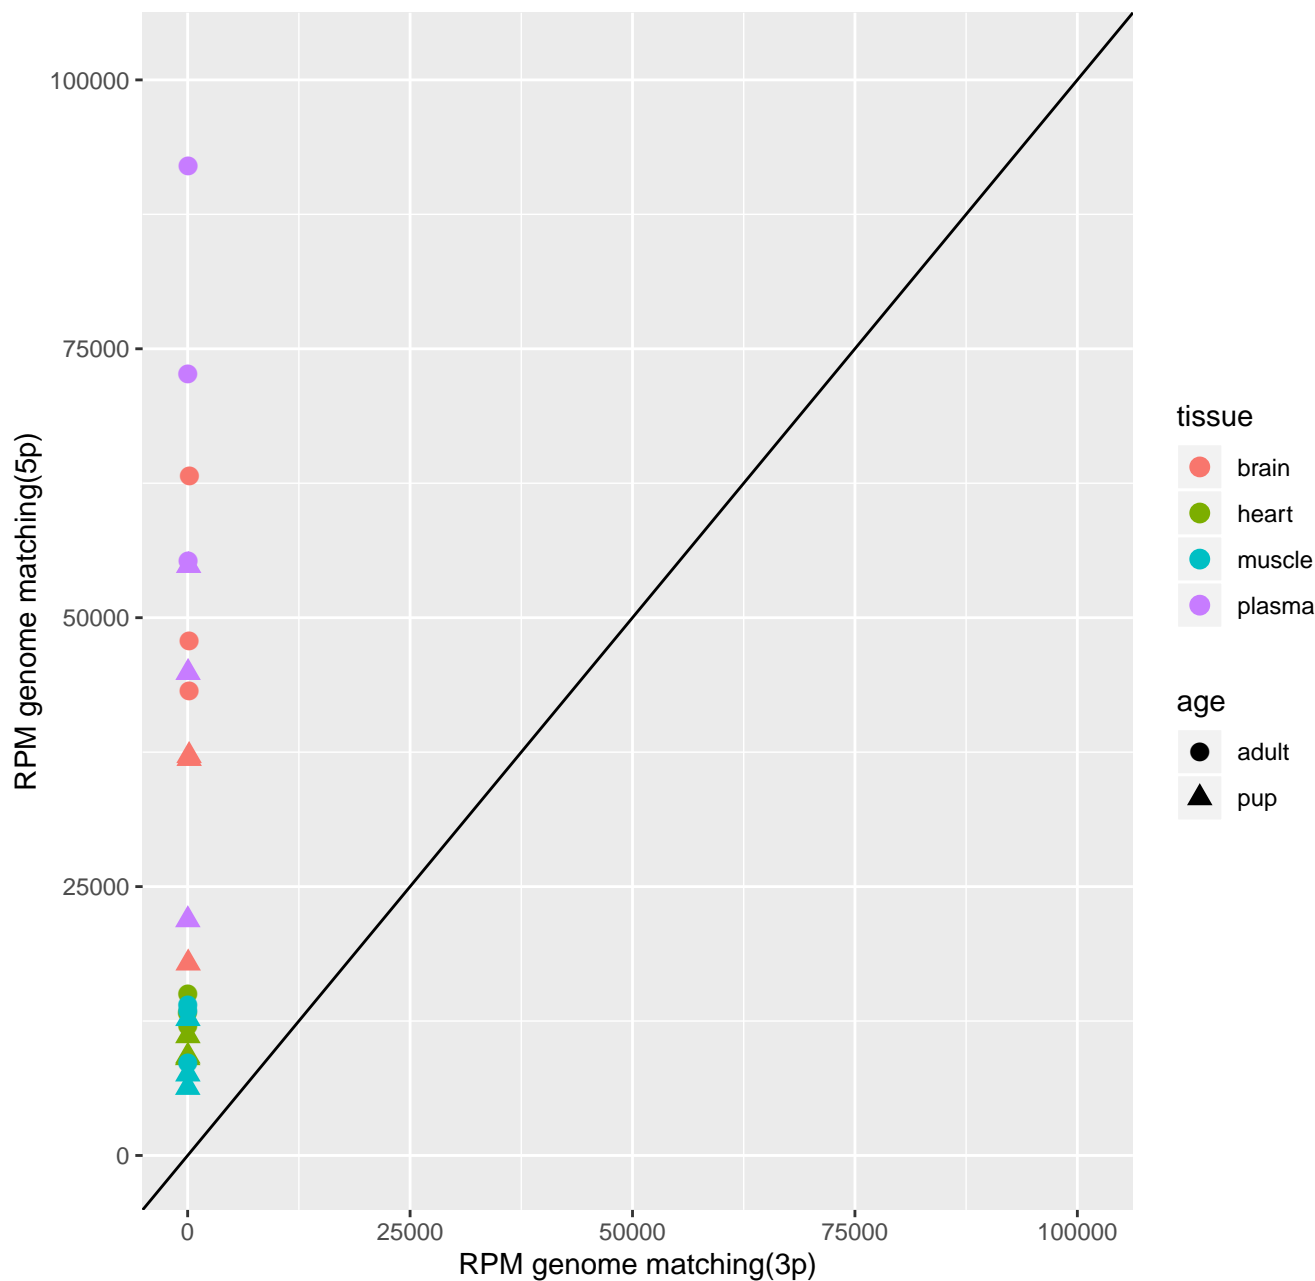

## lwe-miR-425\_loc1

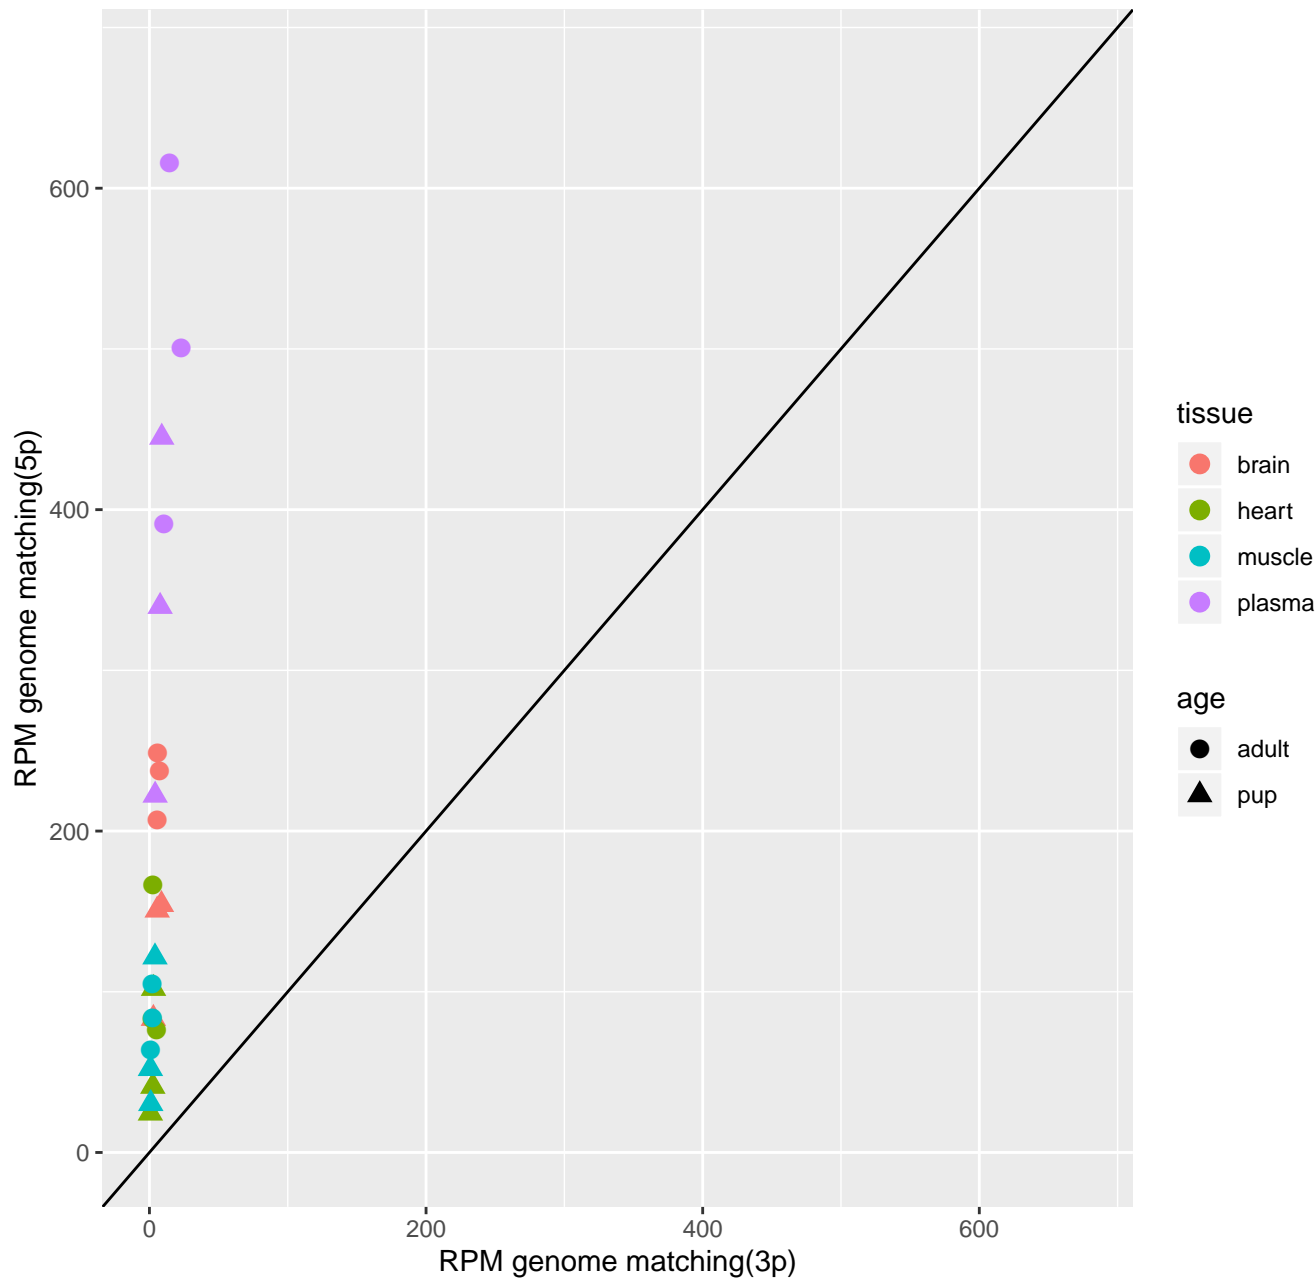



## lwe-miR-146a\_loc1

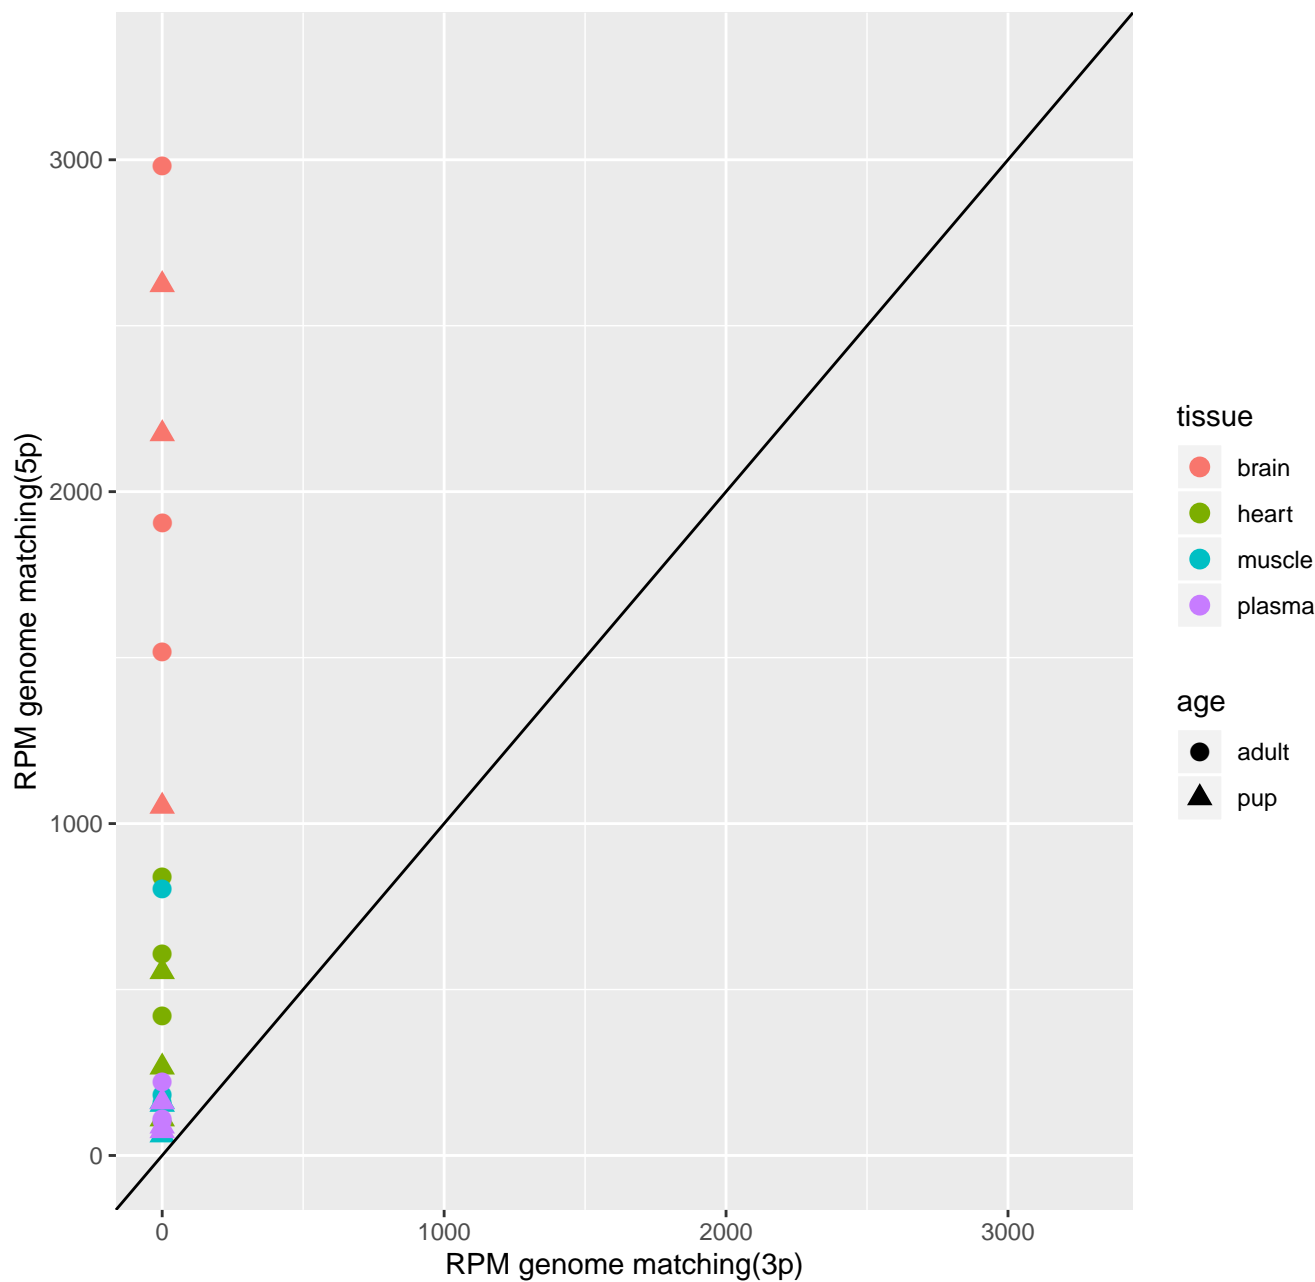

## lwe-miR-130b\_loc1

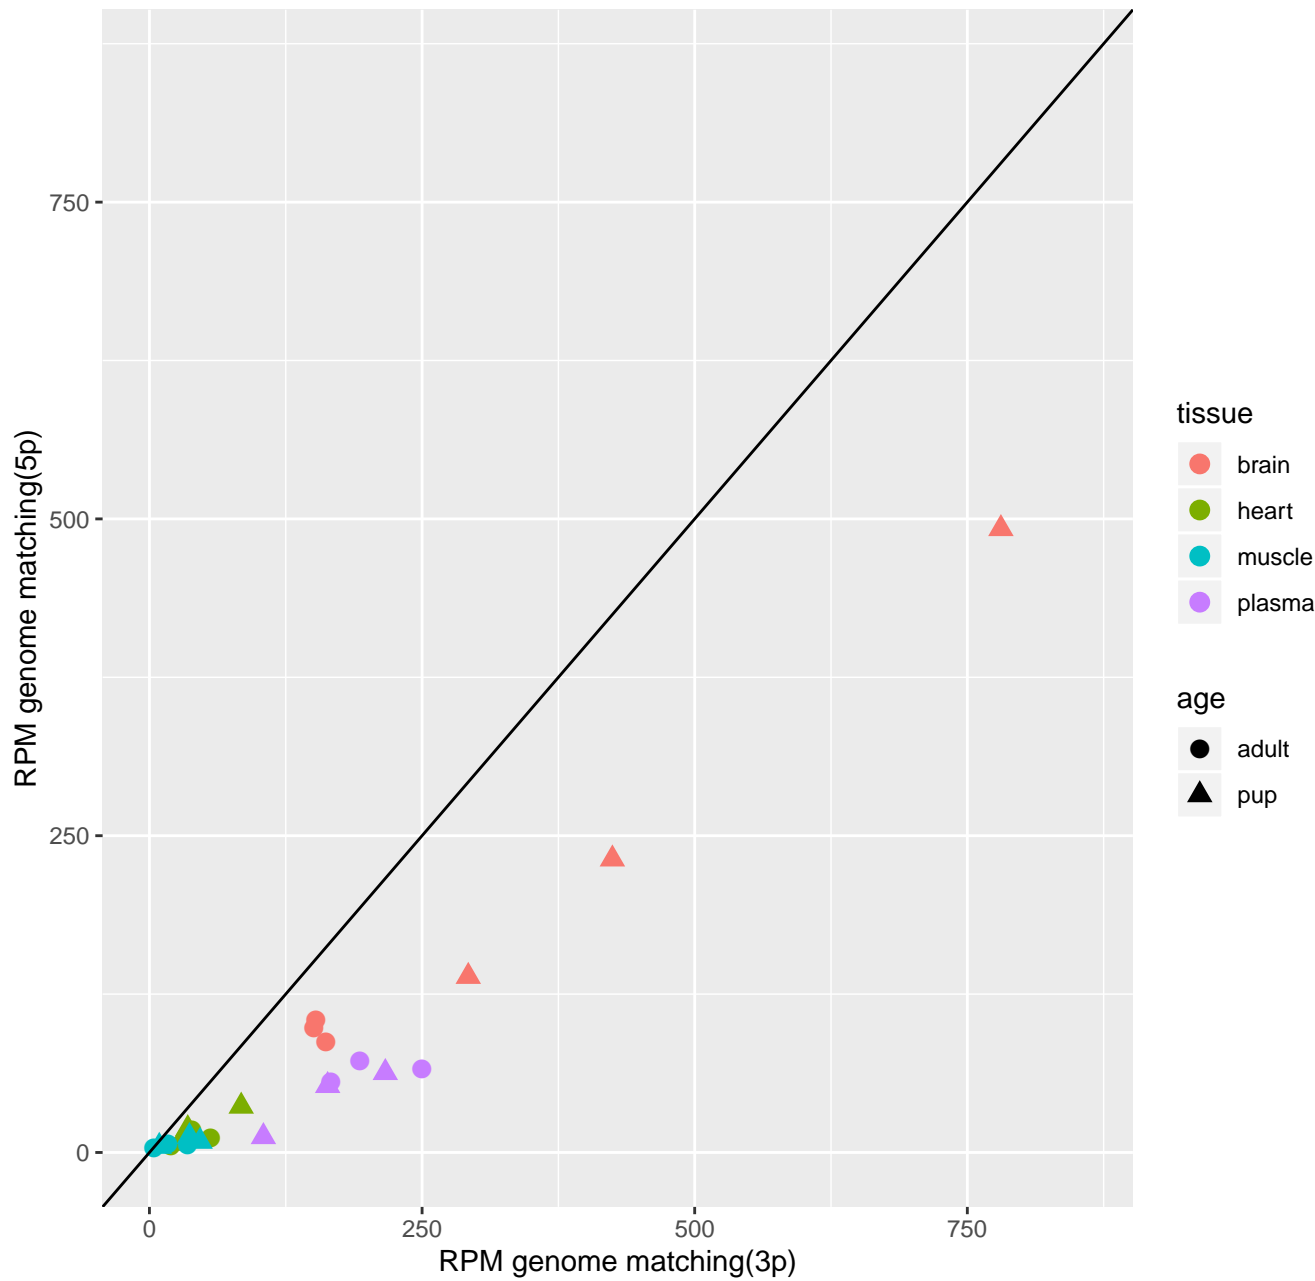

novel\_139

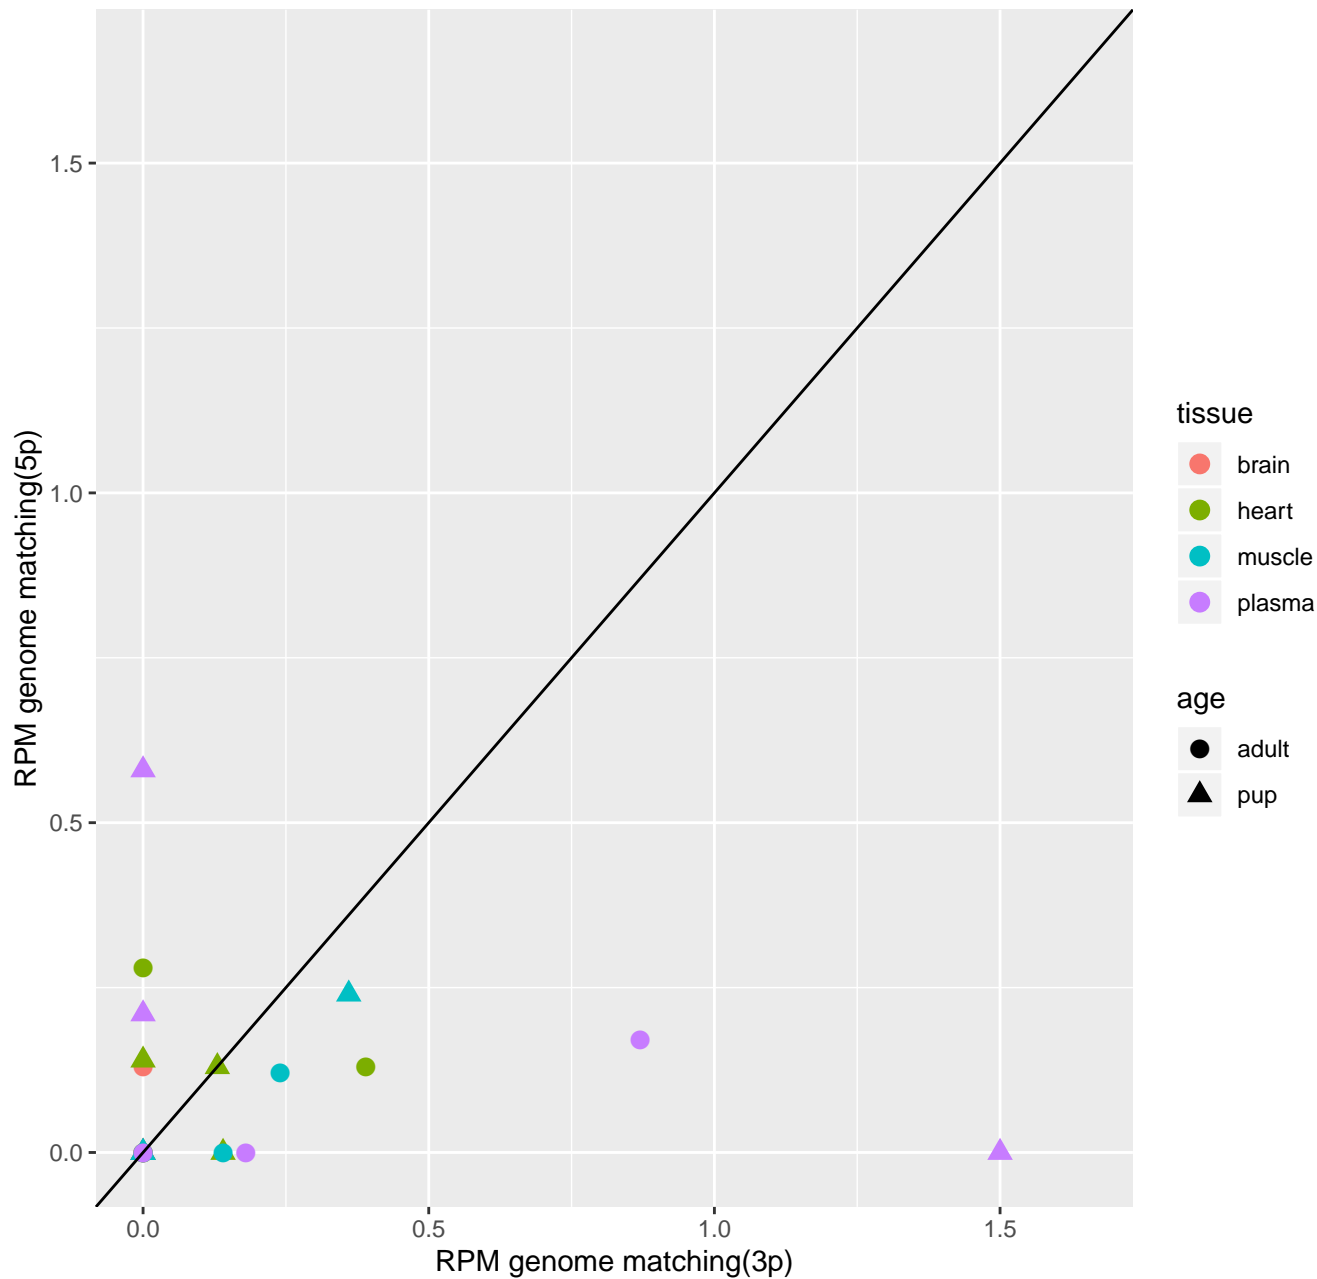

## novel\_140

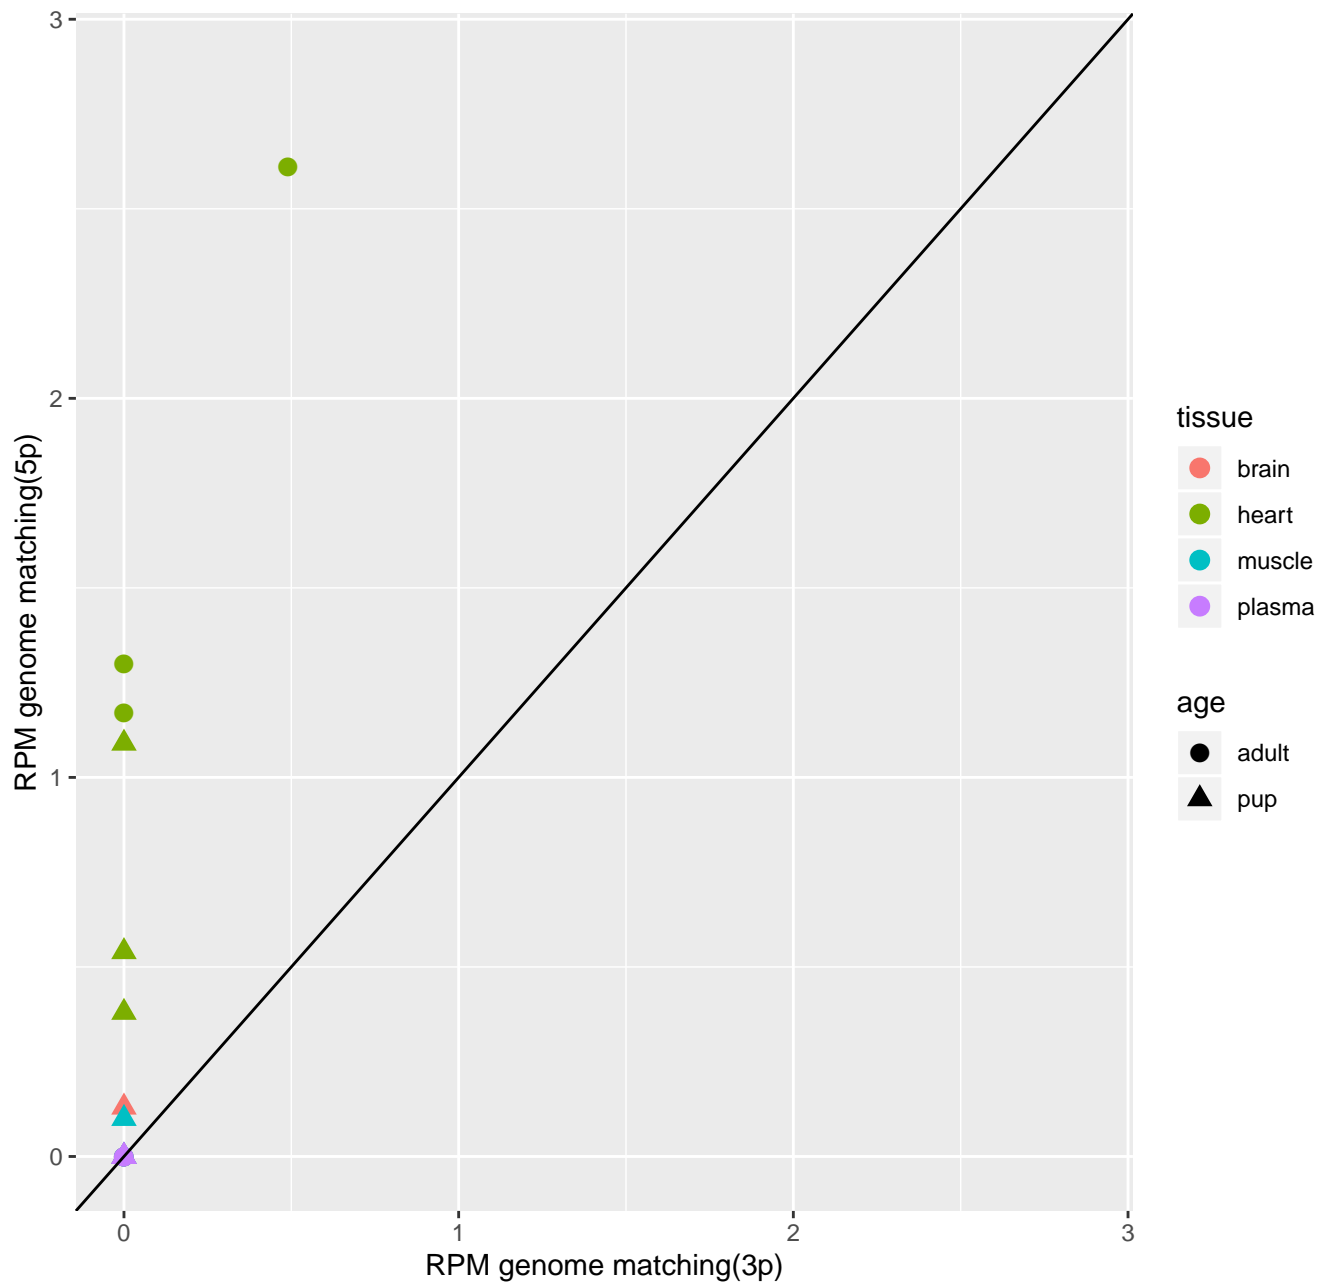

## novel\_141

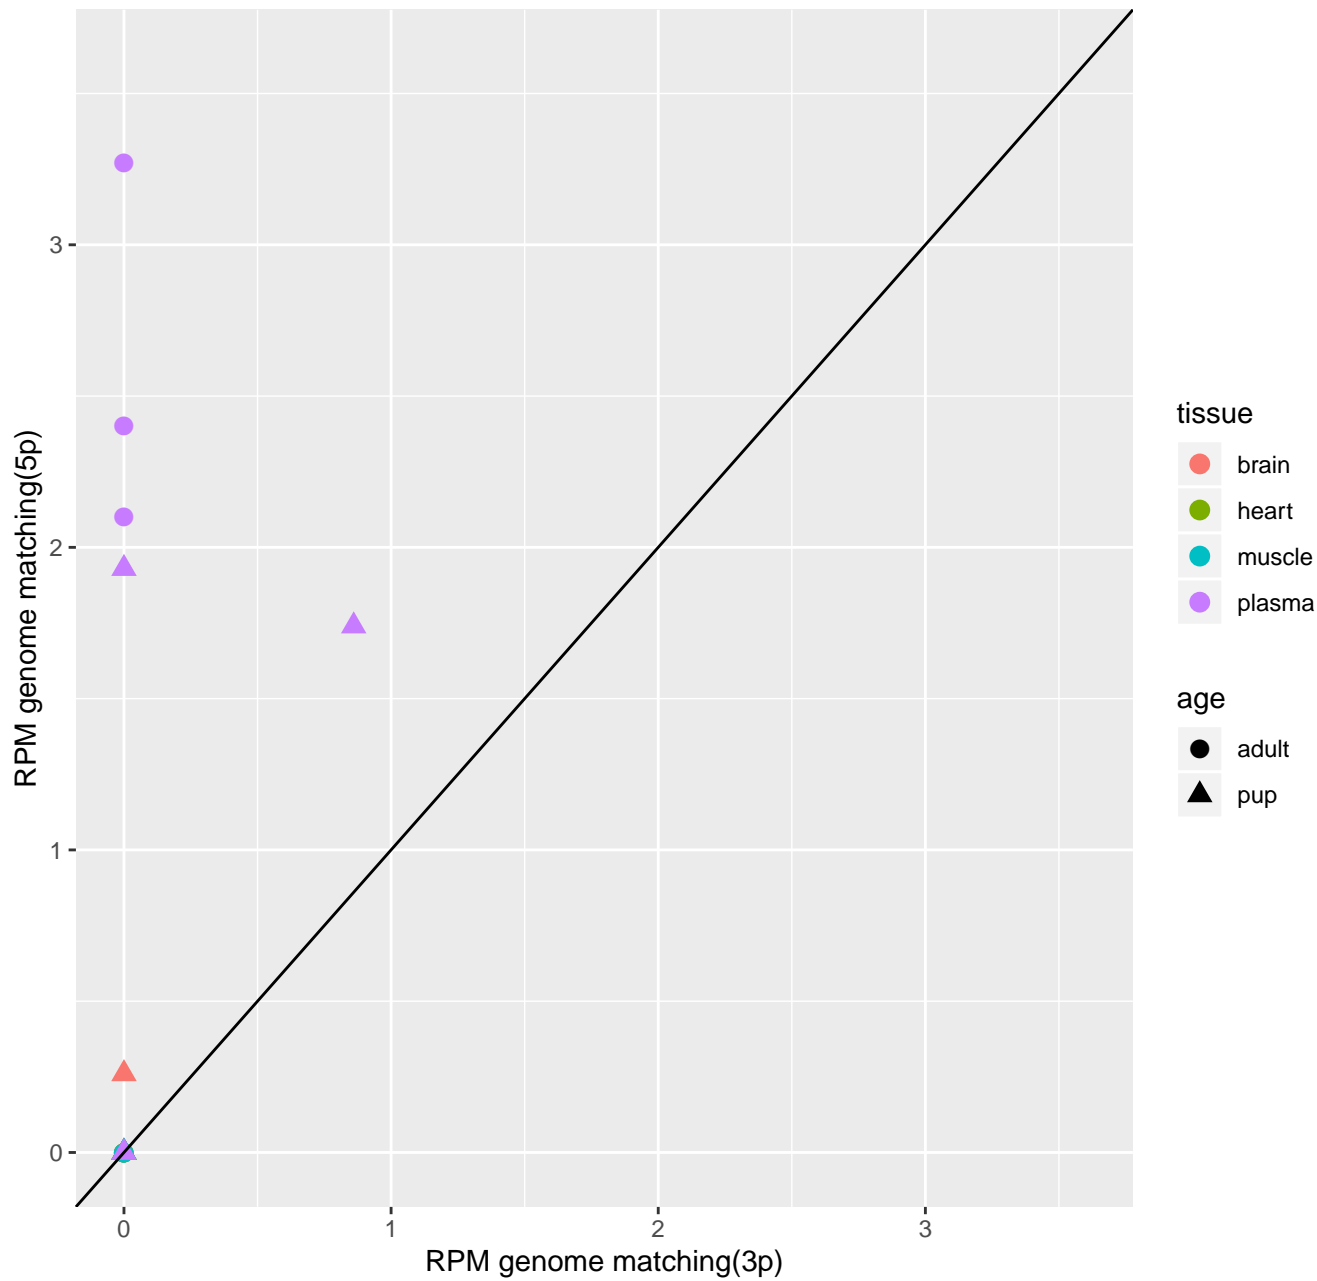

novel\_142

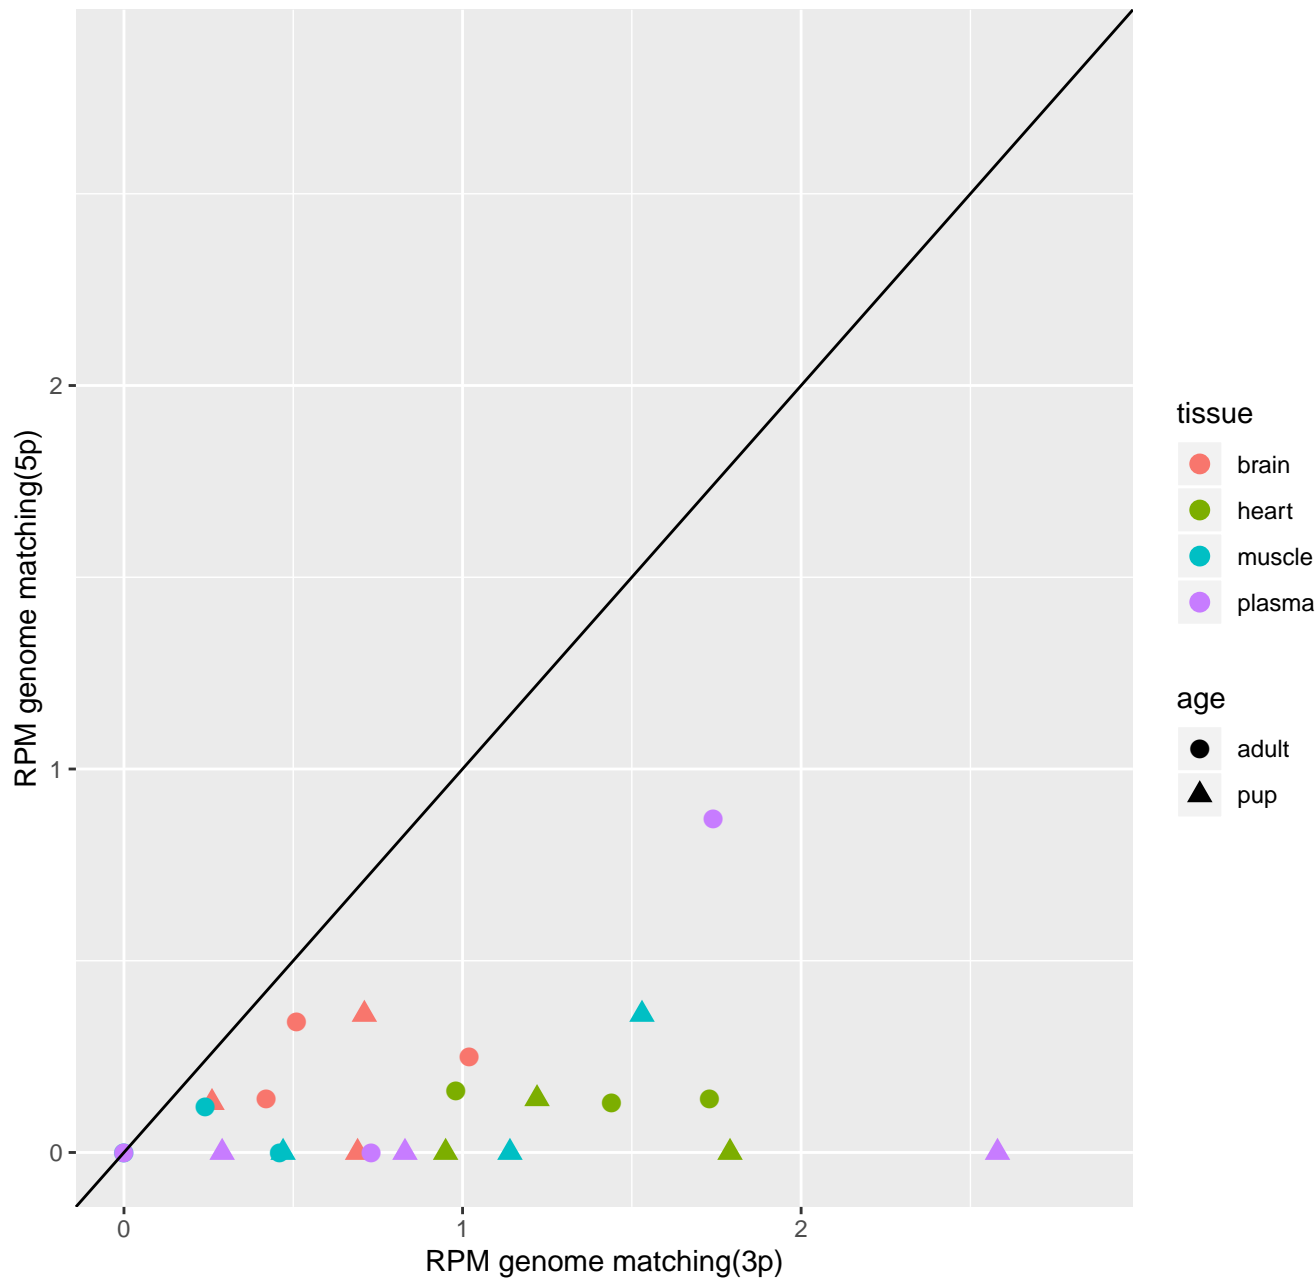

# novel\_143

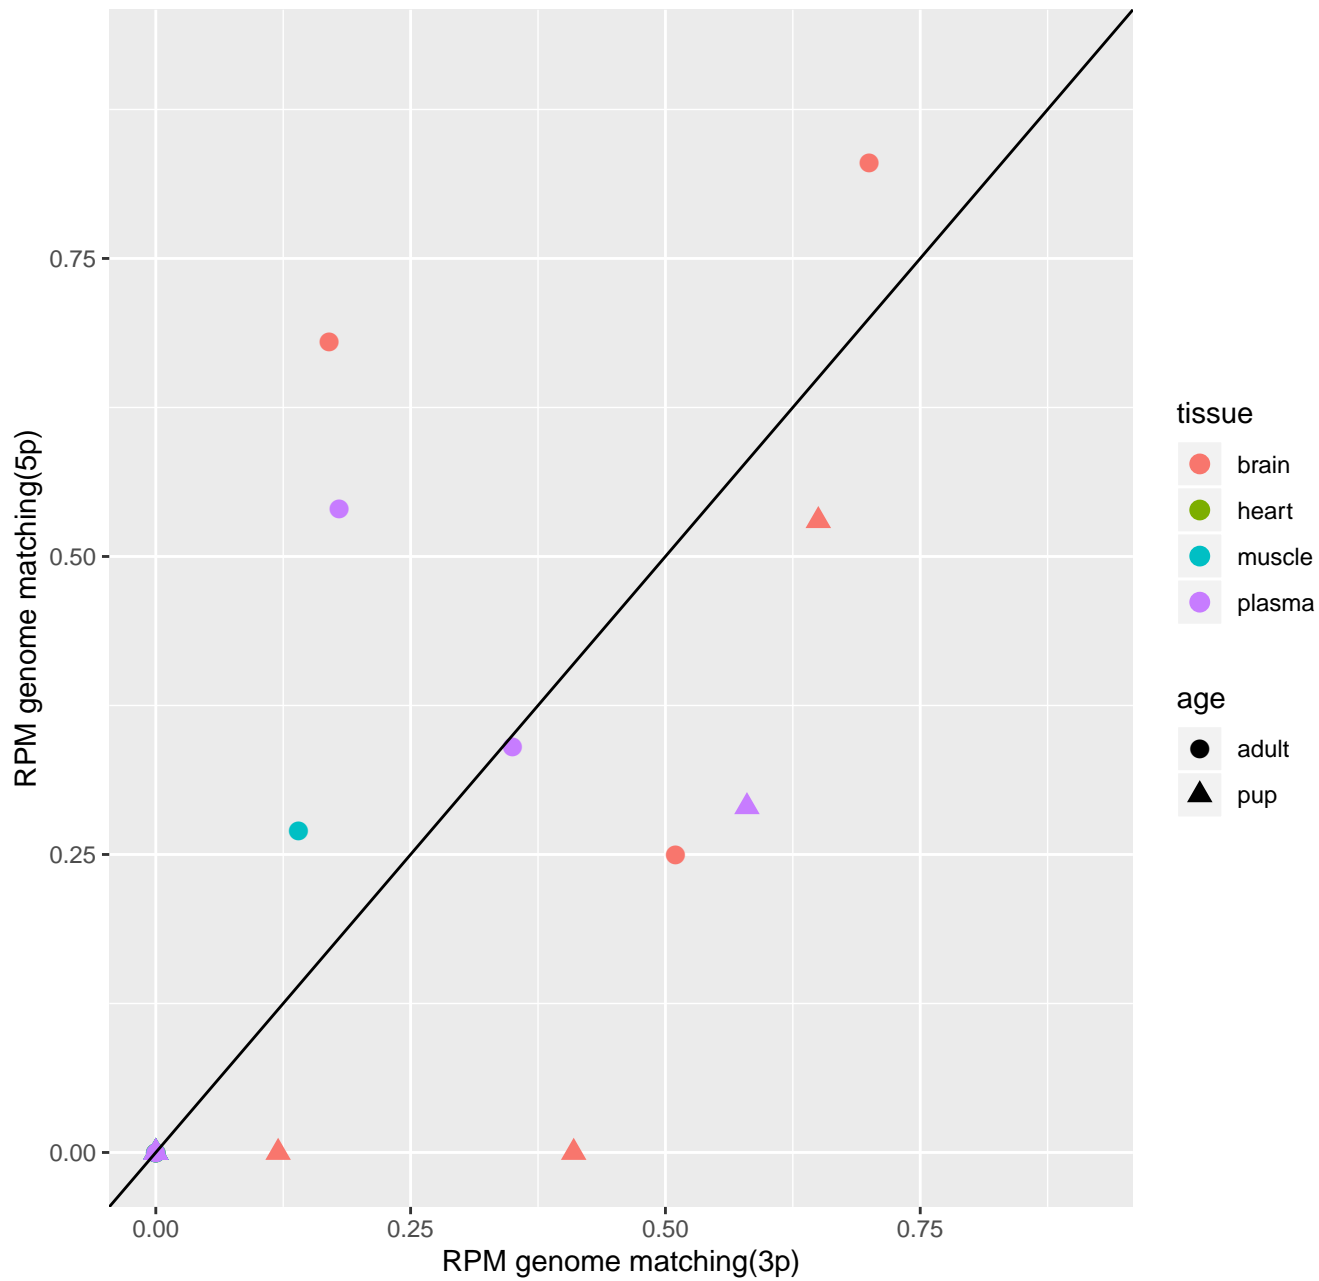

novel\_144

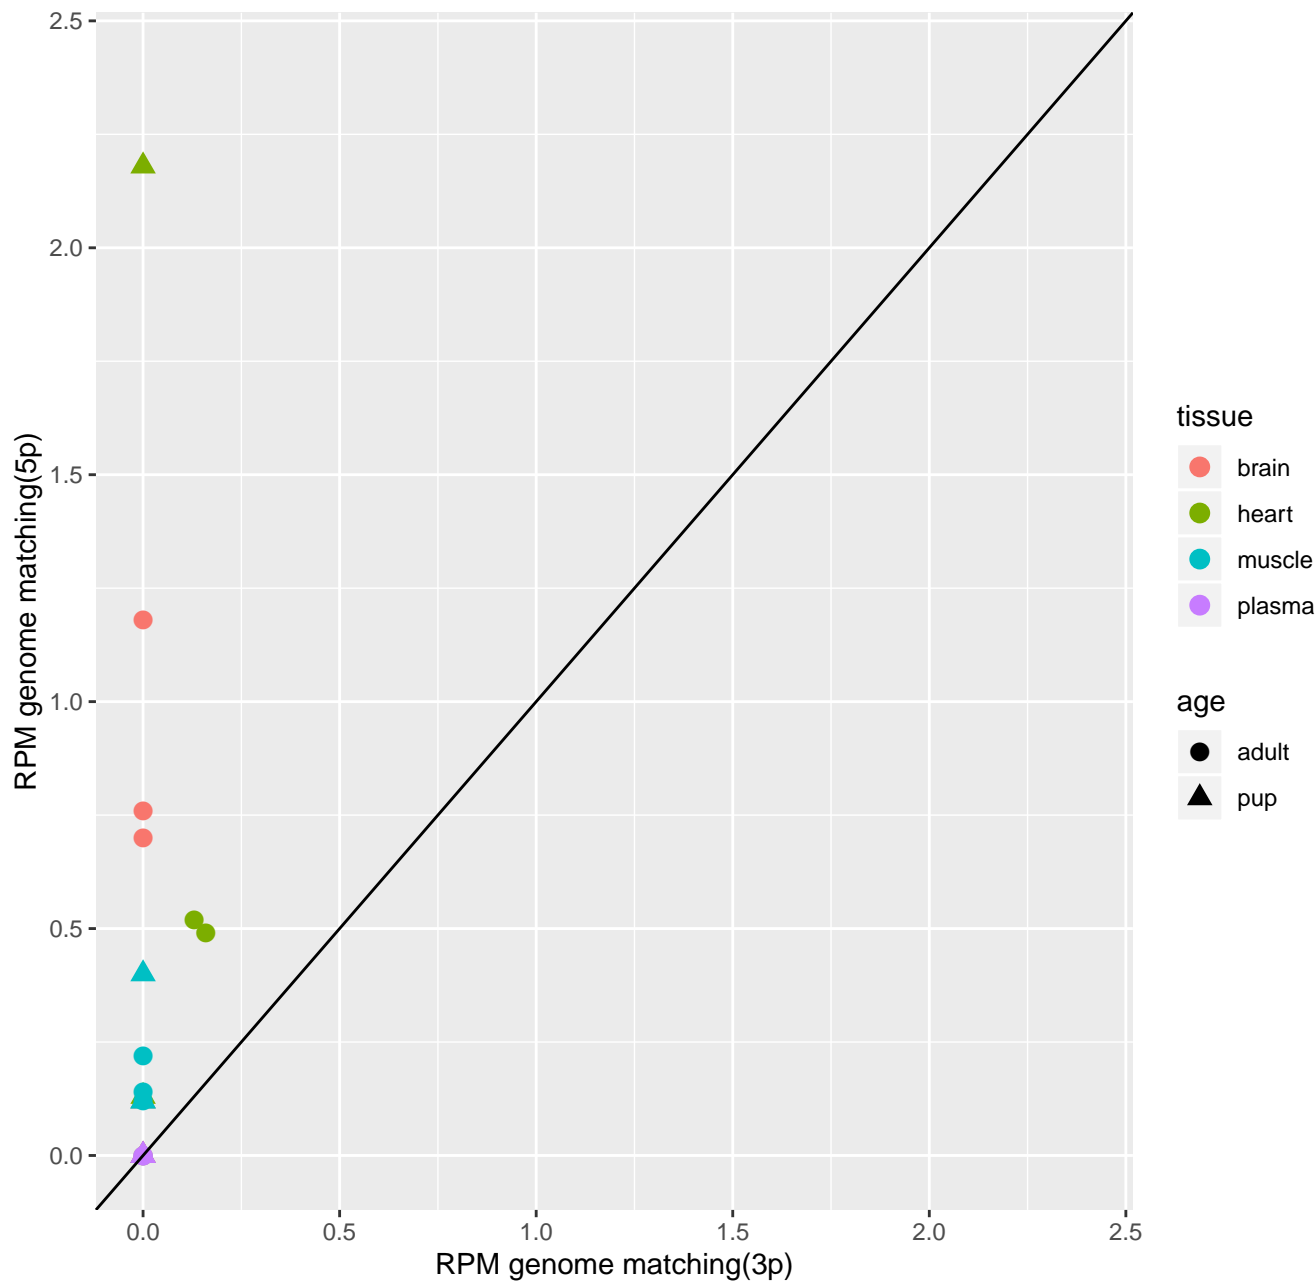



# lwe-miR-335\_loc1

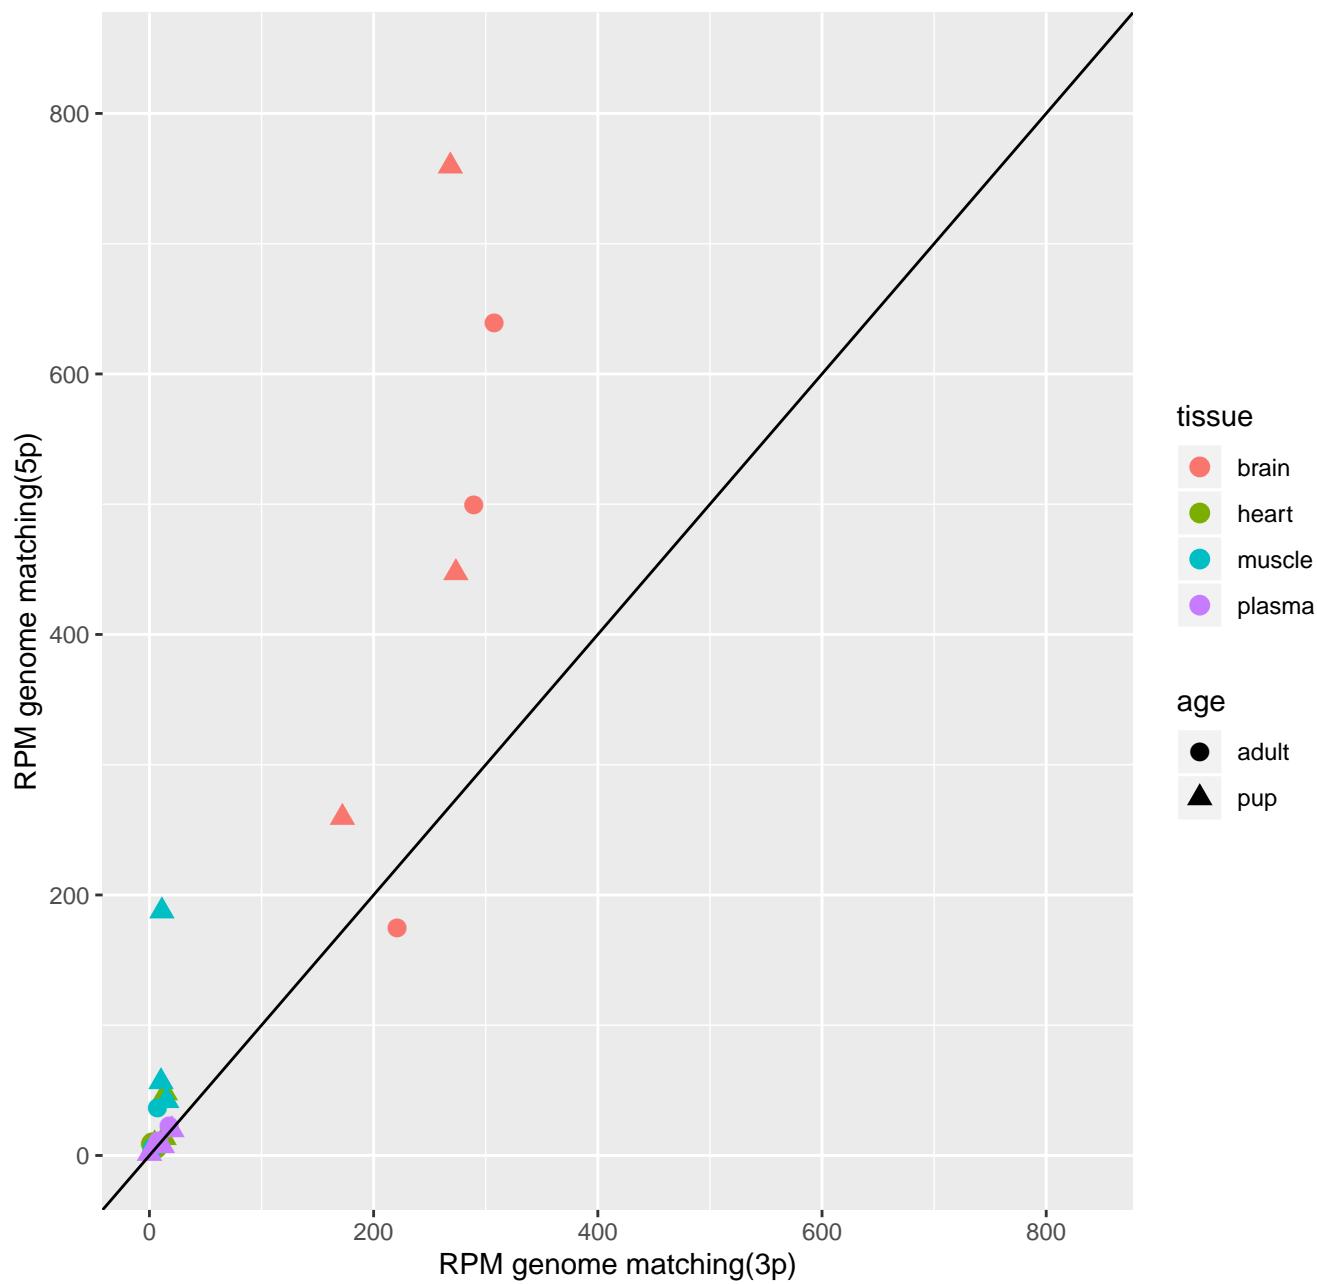

## lwe-miR-29c-1\_loc2

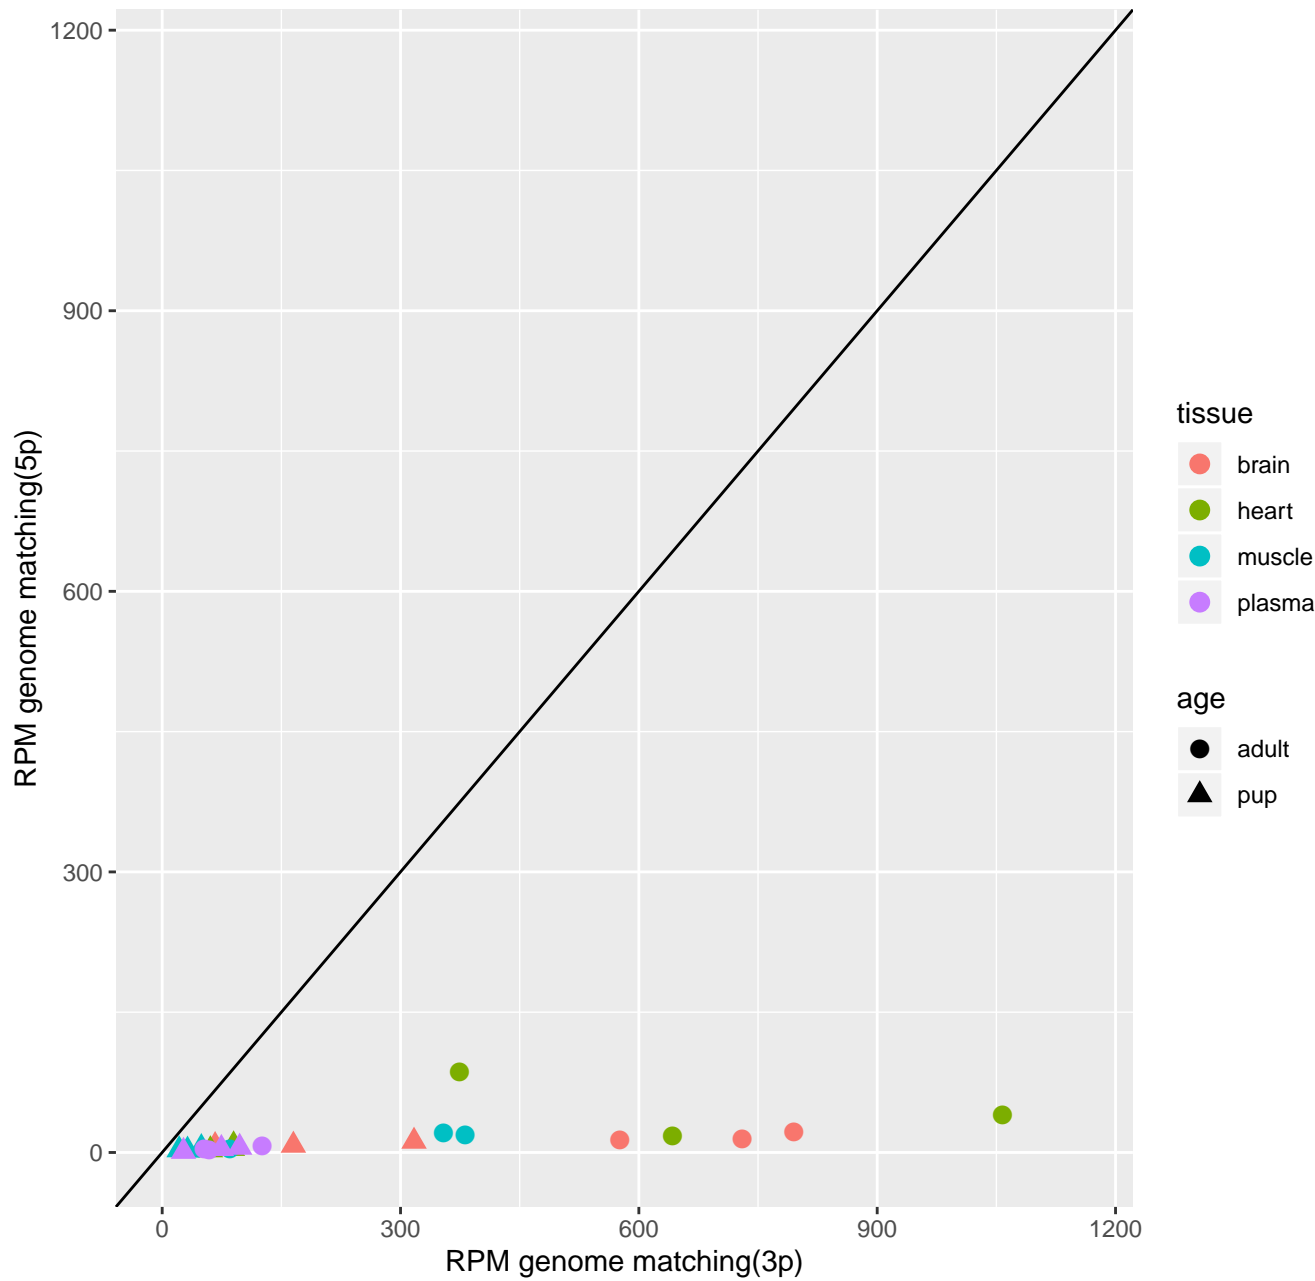

## novel\_145

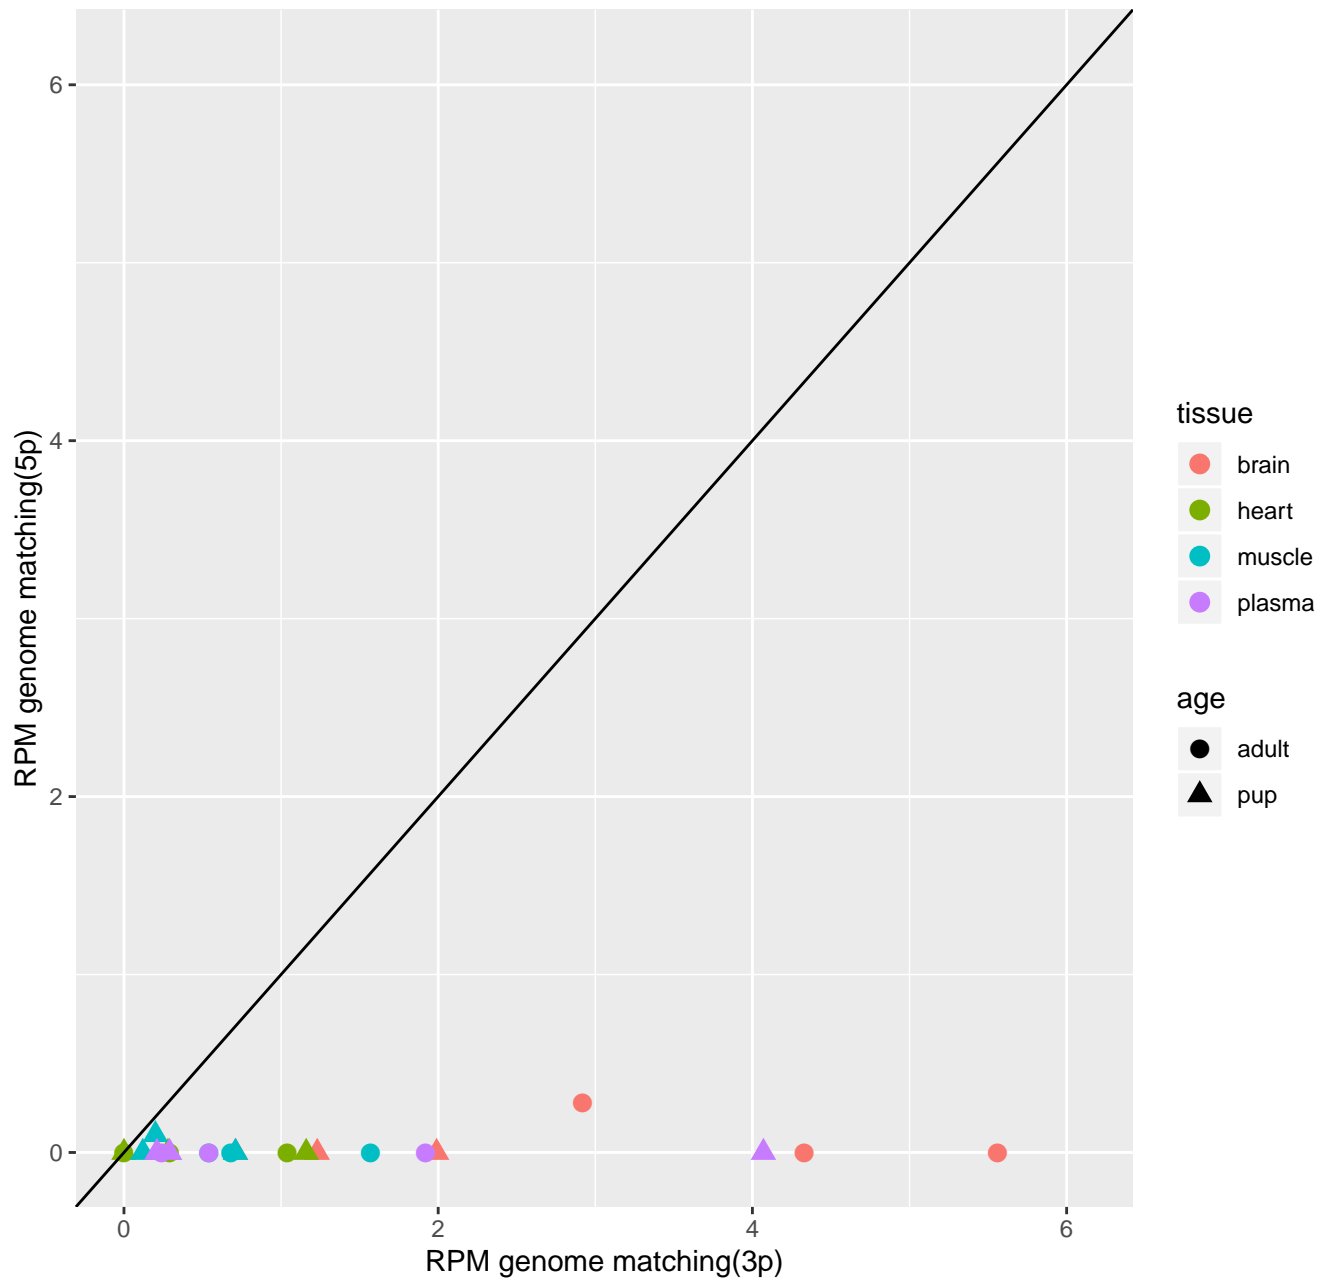

# lwe-miR-208b\_loc1

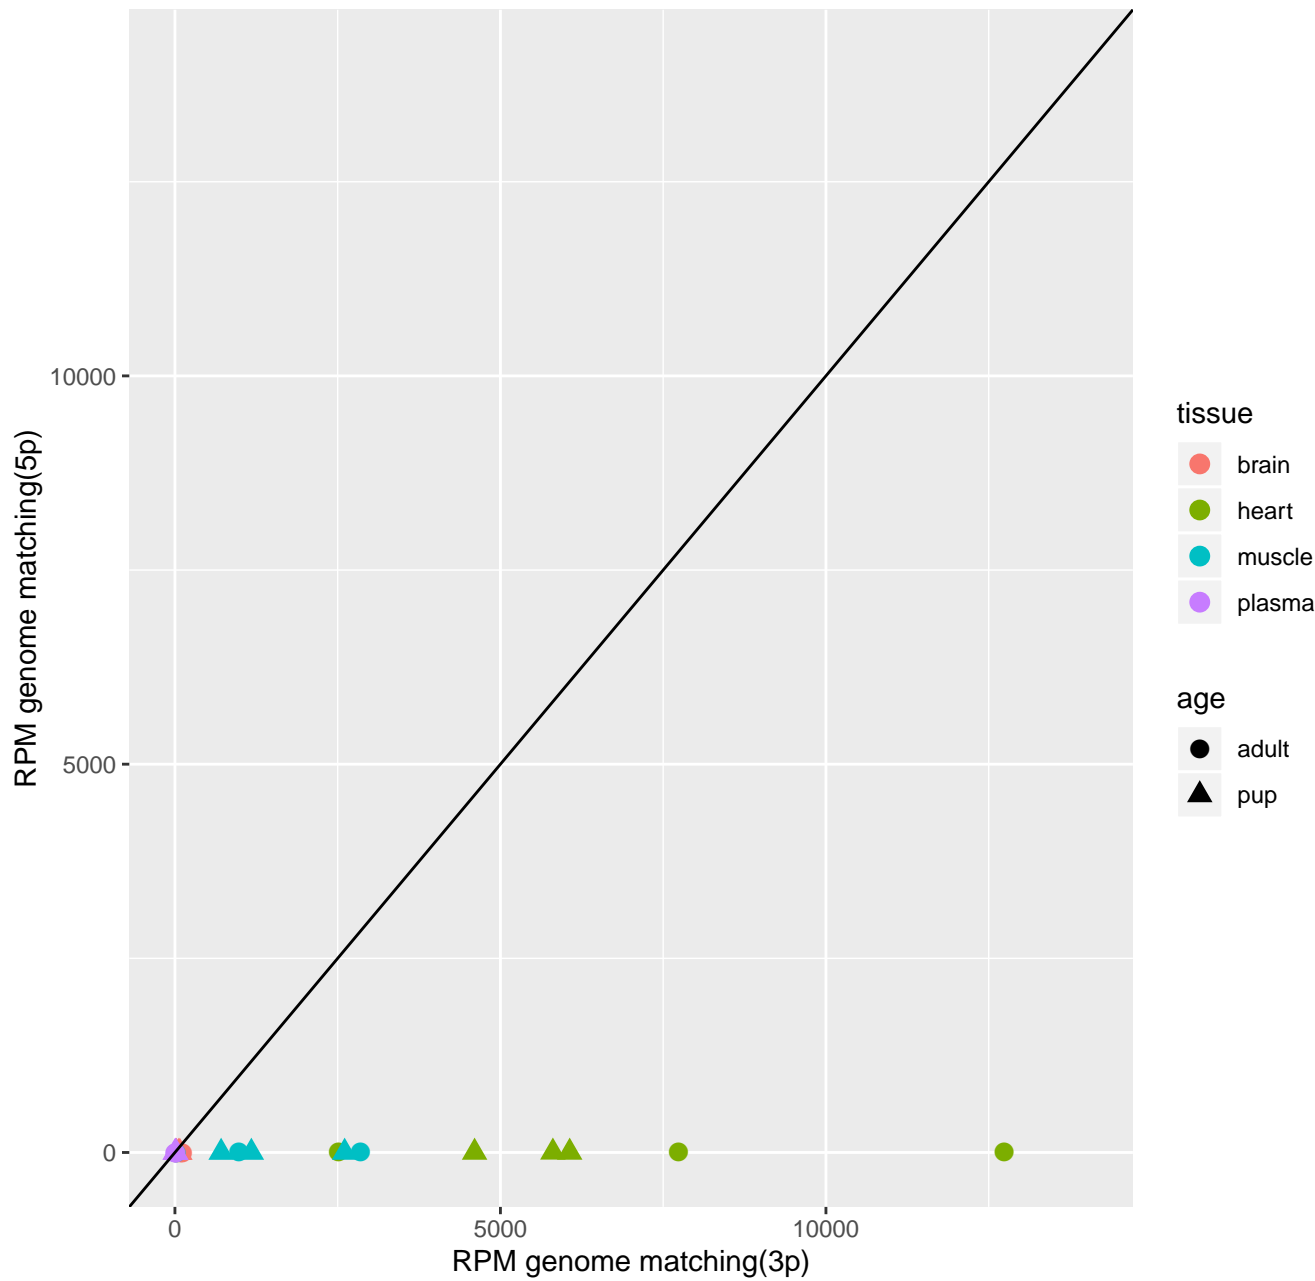



# WS\_miRDeep2\_novel\_1

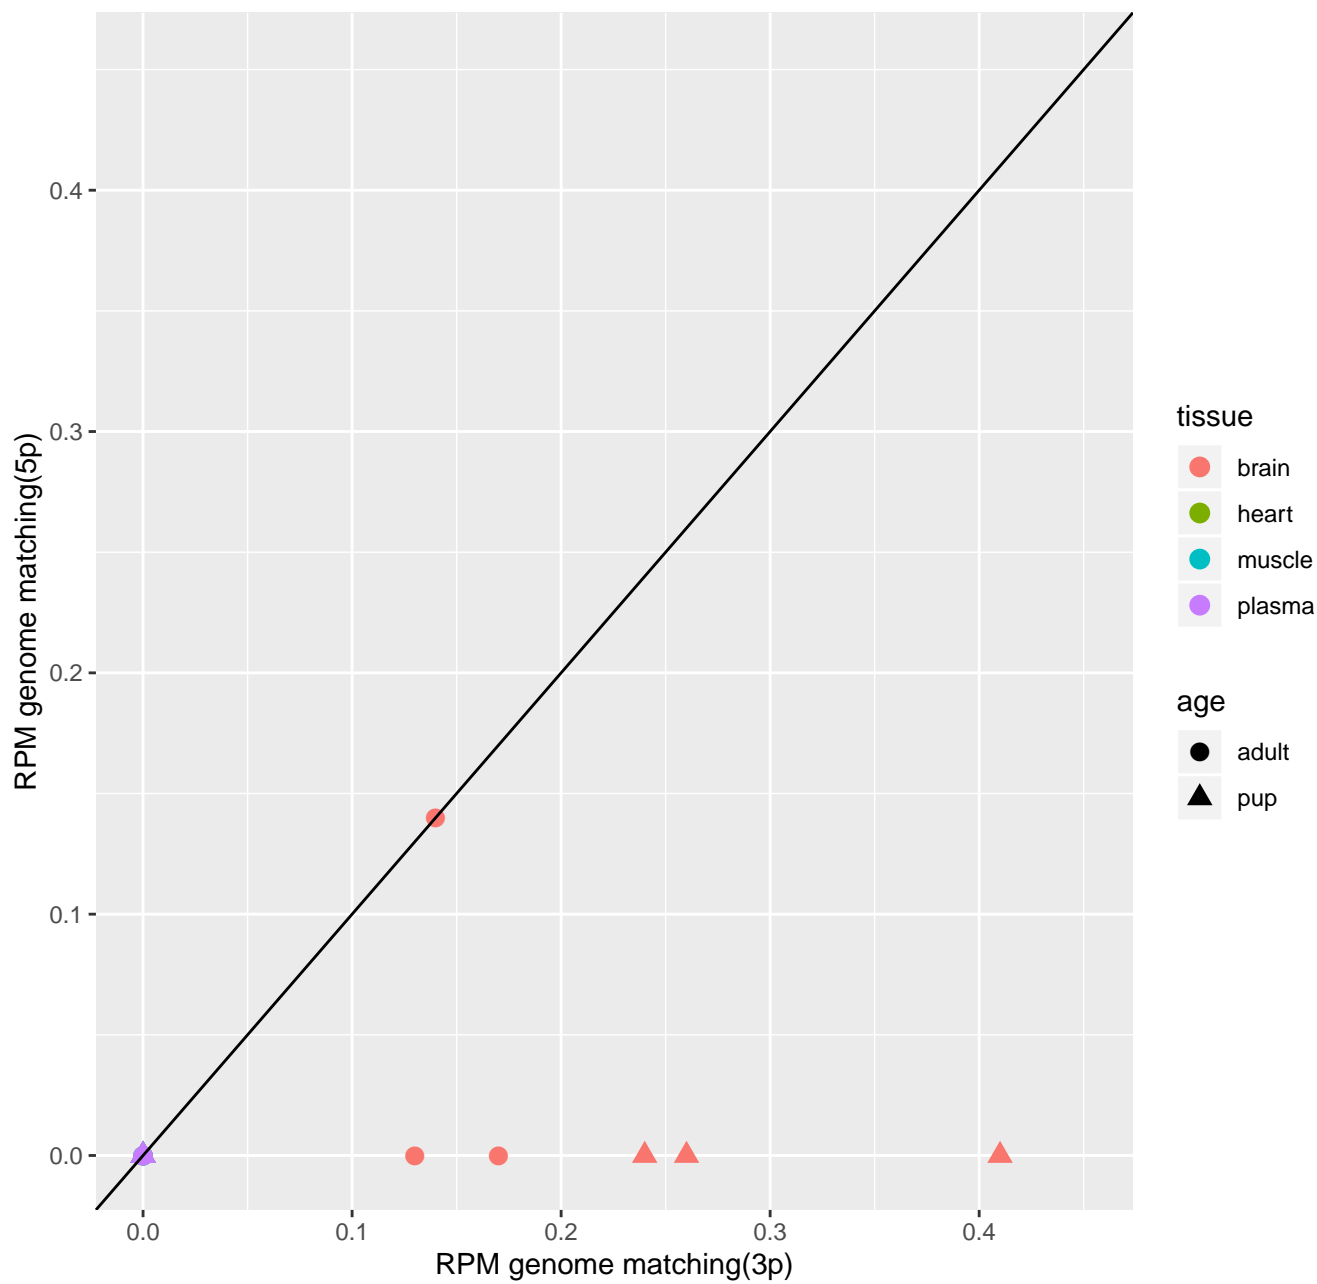

# WS\_miRDeep2\_novel\_2

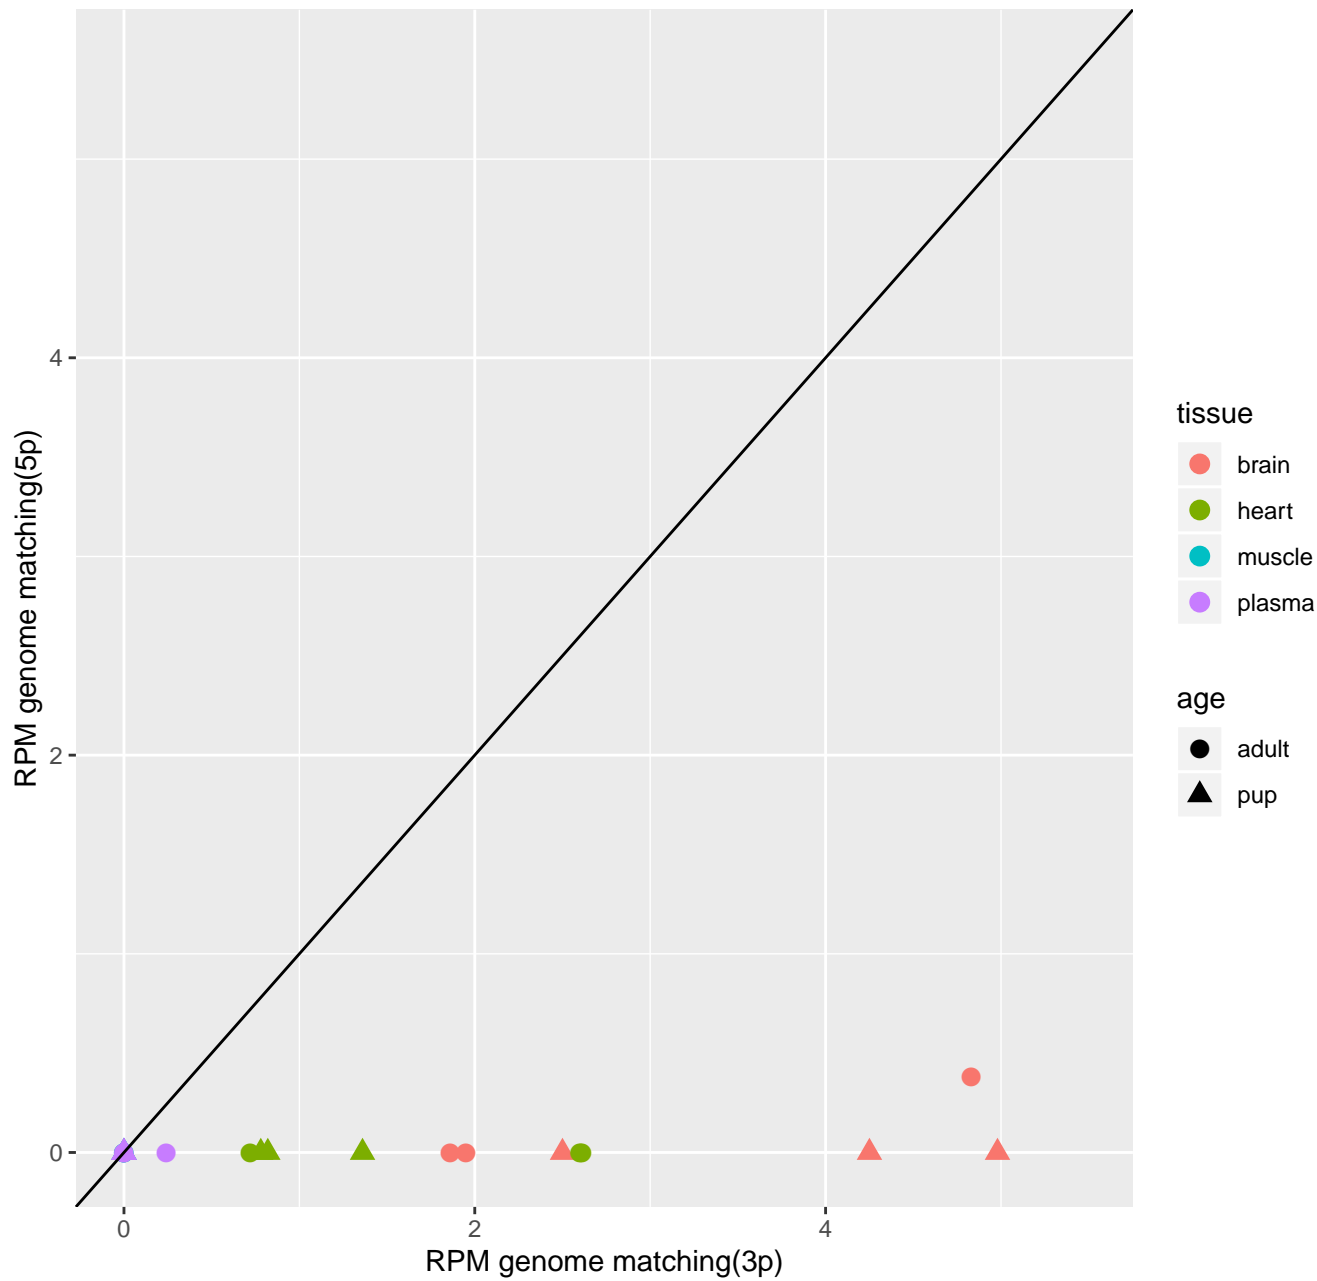

WS\_miRDeep2\_novel\_3

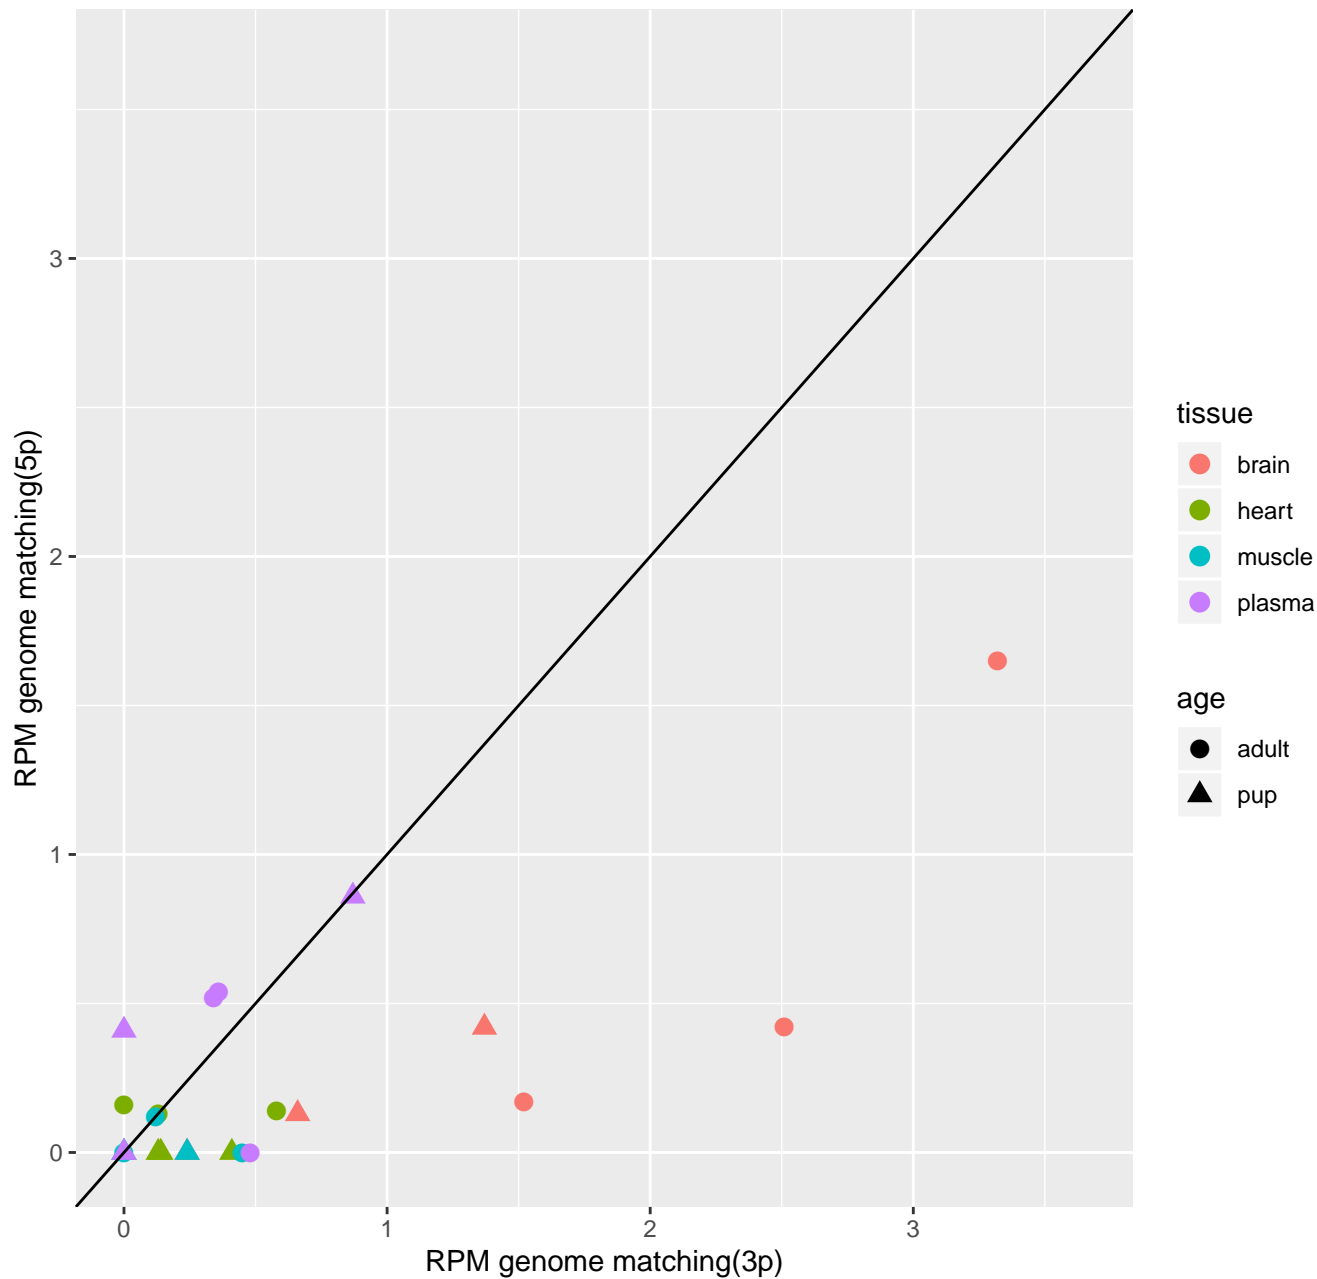



## WS\_miRDeep2\_novel\_4

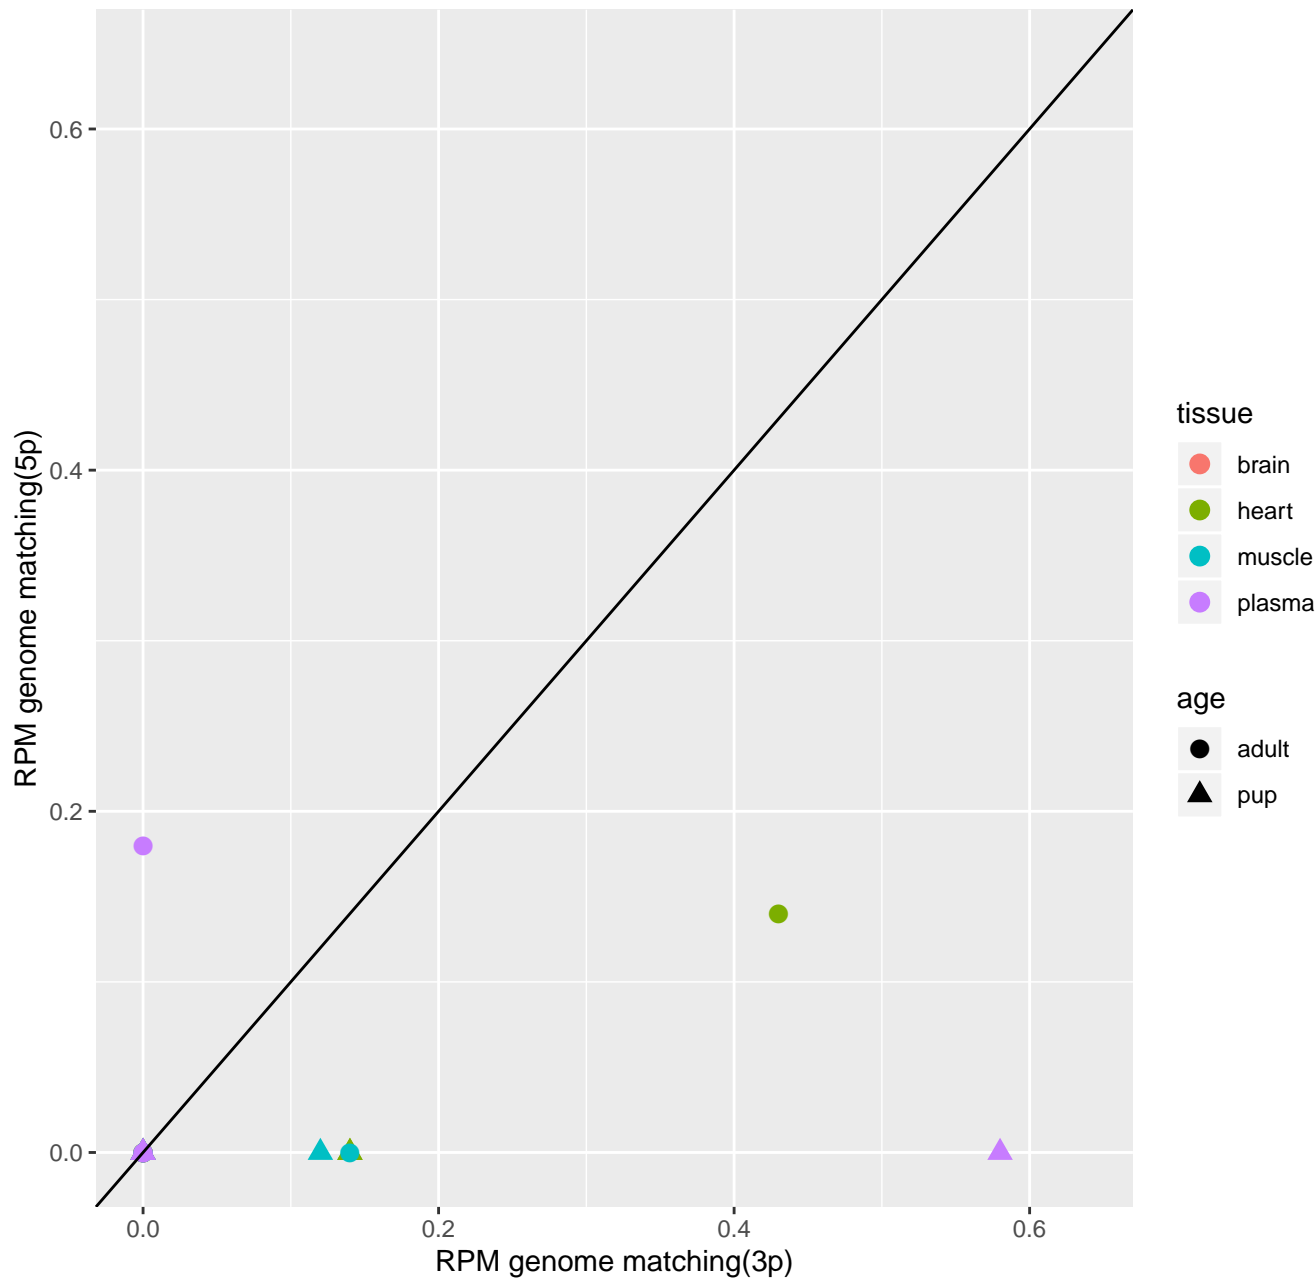

## lwe-miR-3552\_loc1

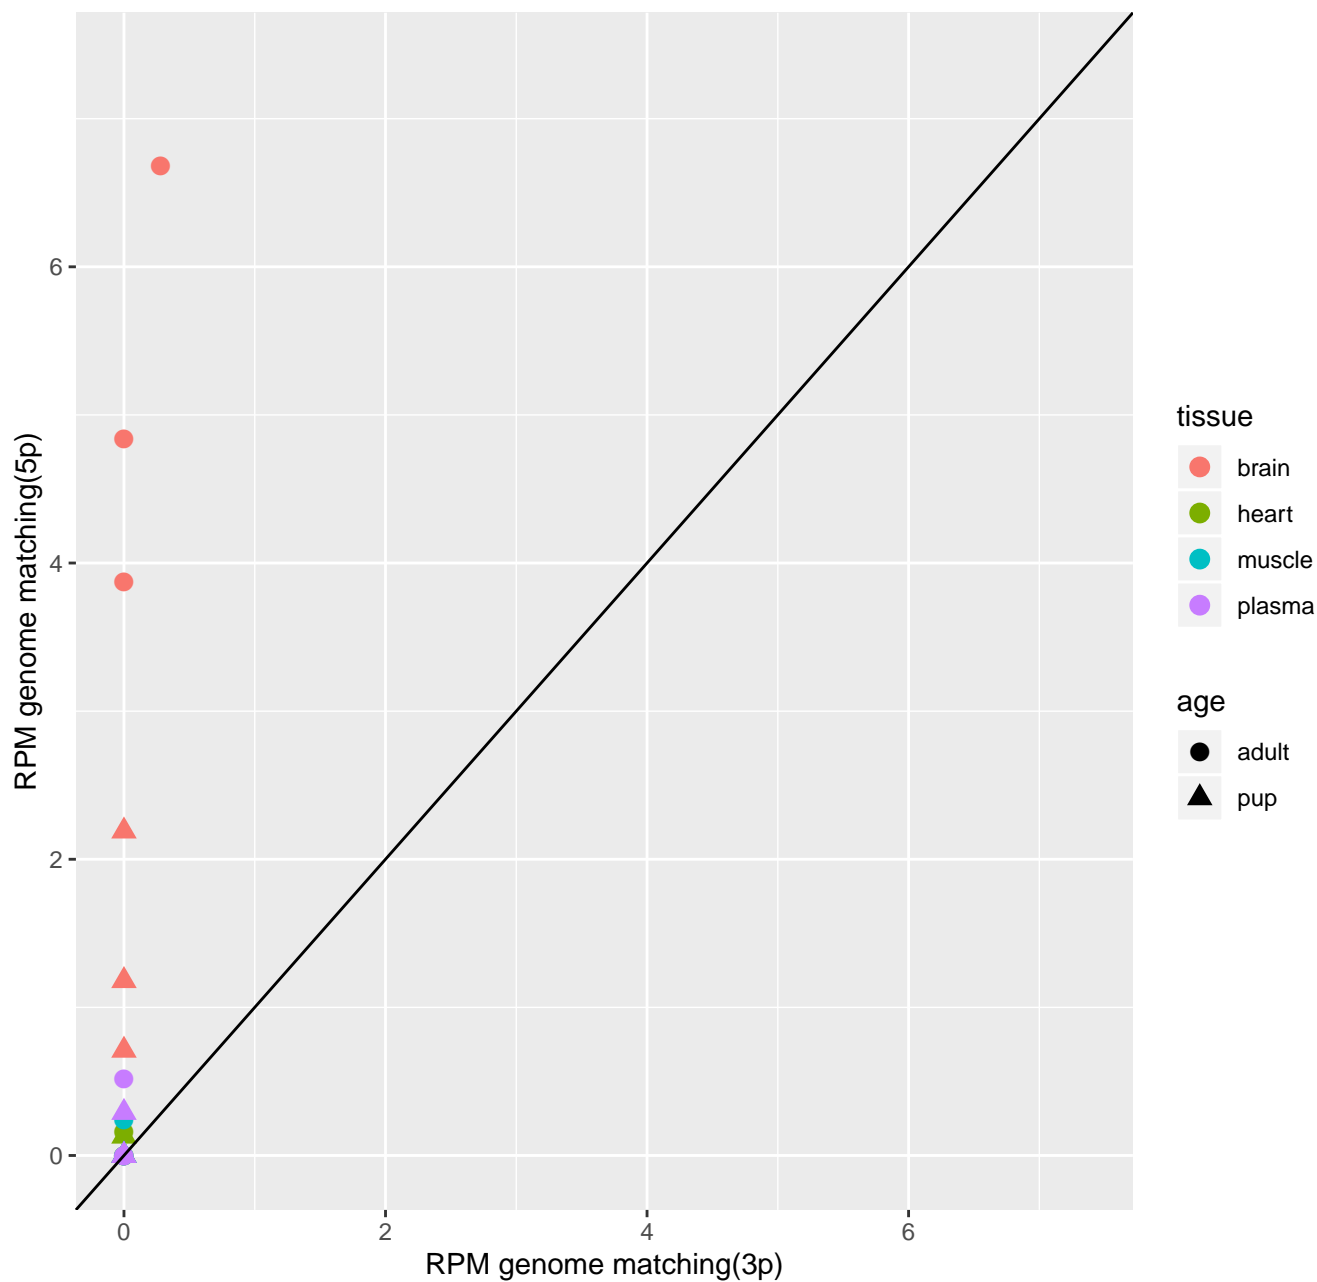

## WS\_miRDeep2\_novel\_6

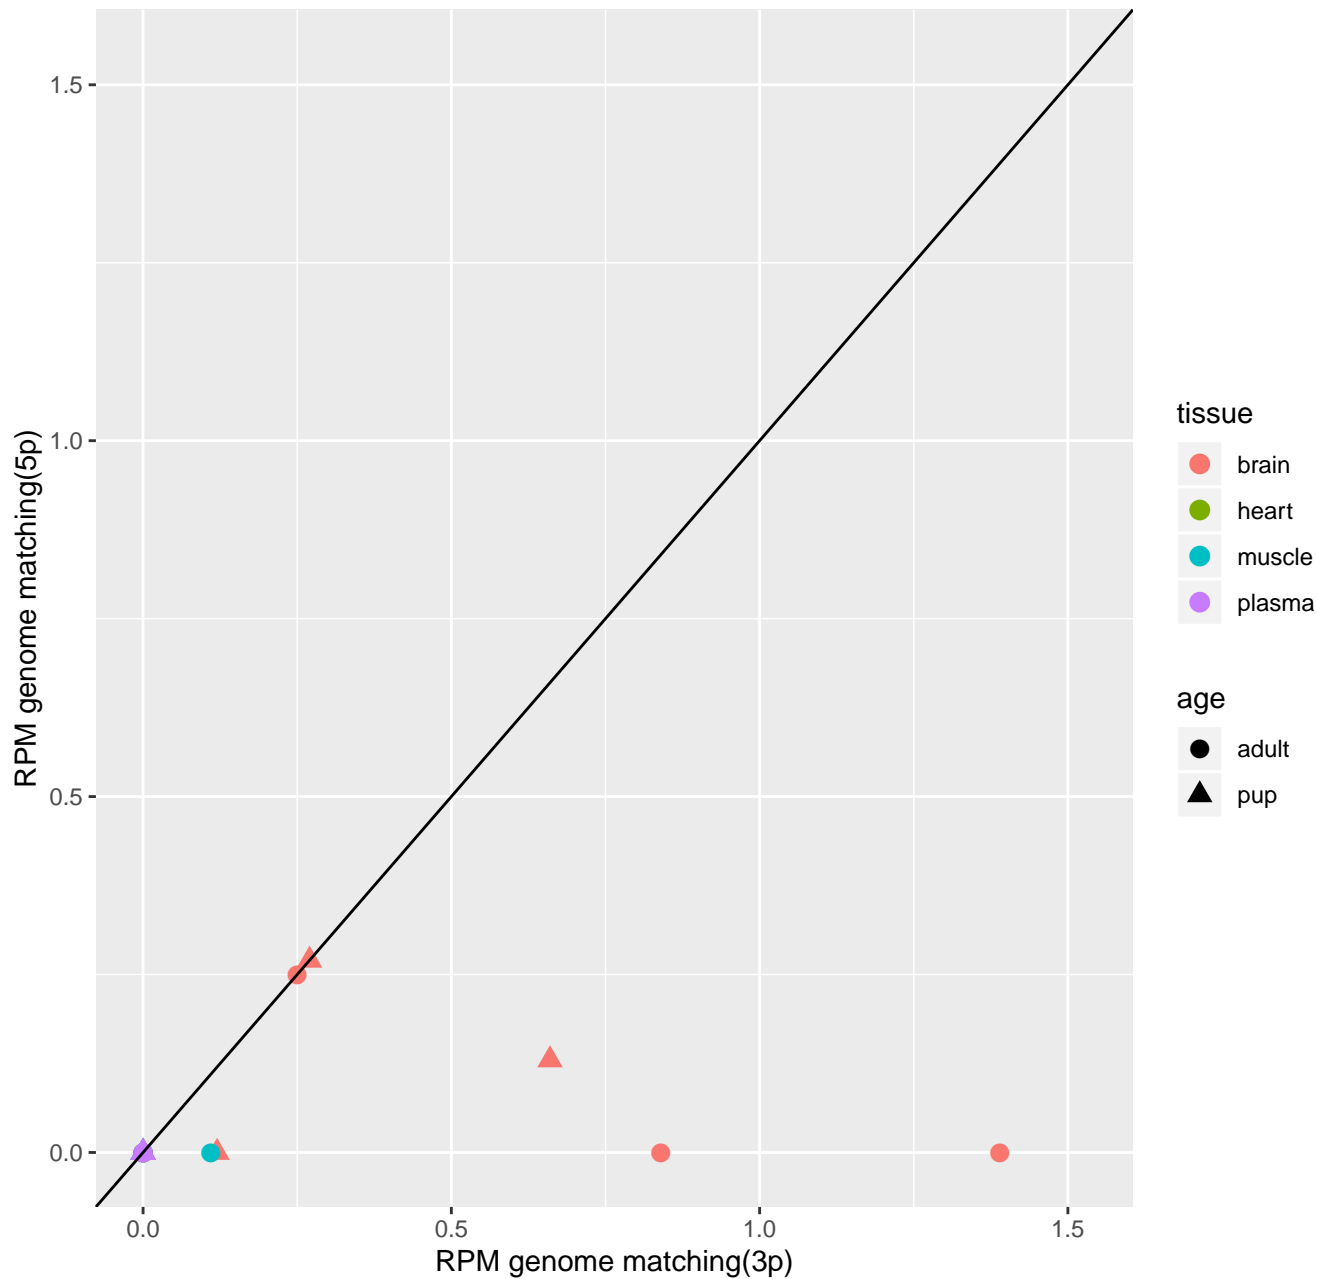

## lwe-miR-193b\_miRDeep2\_loc1

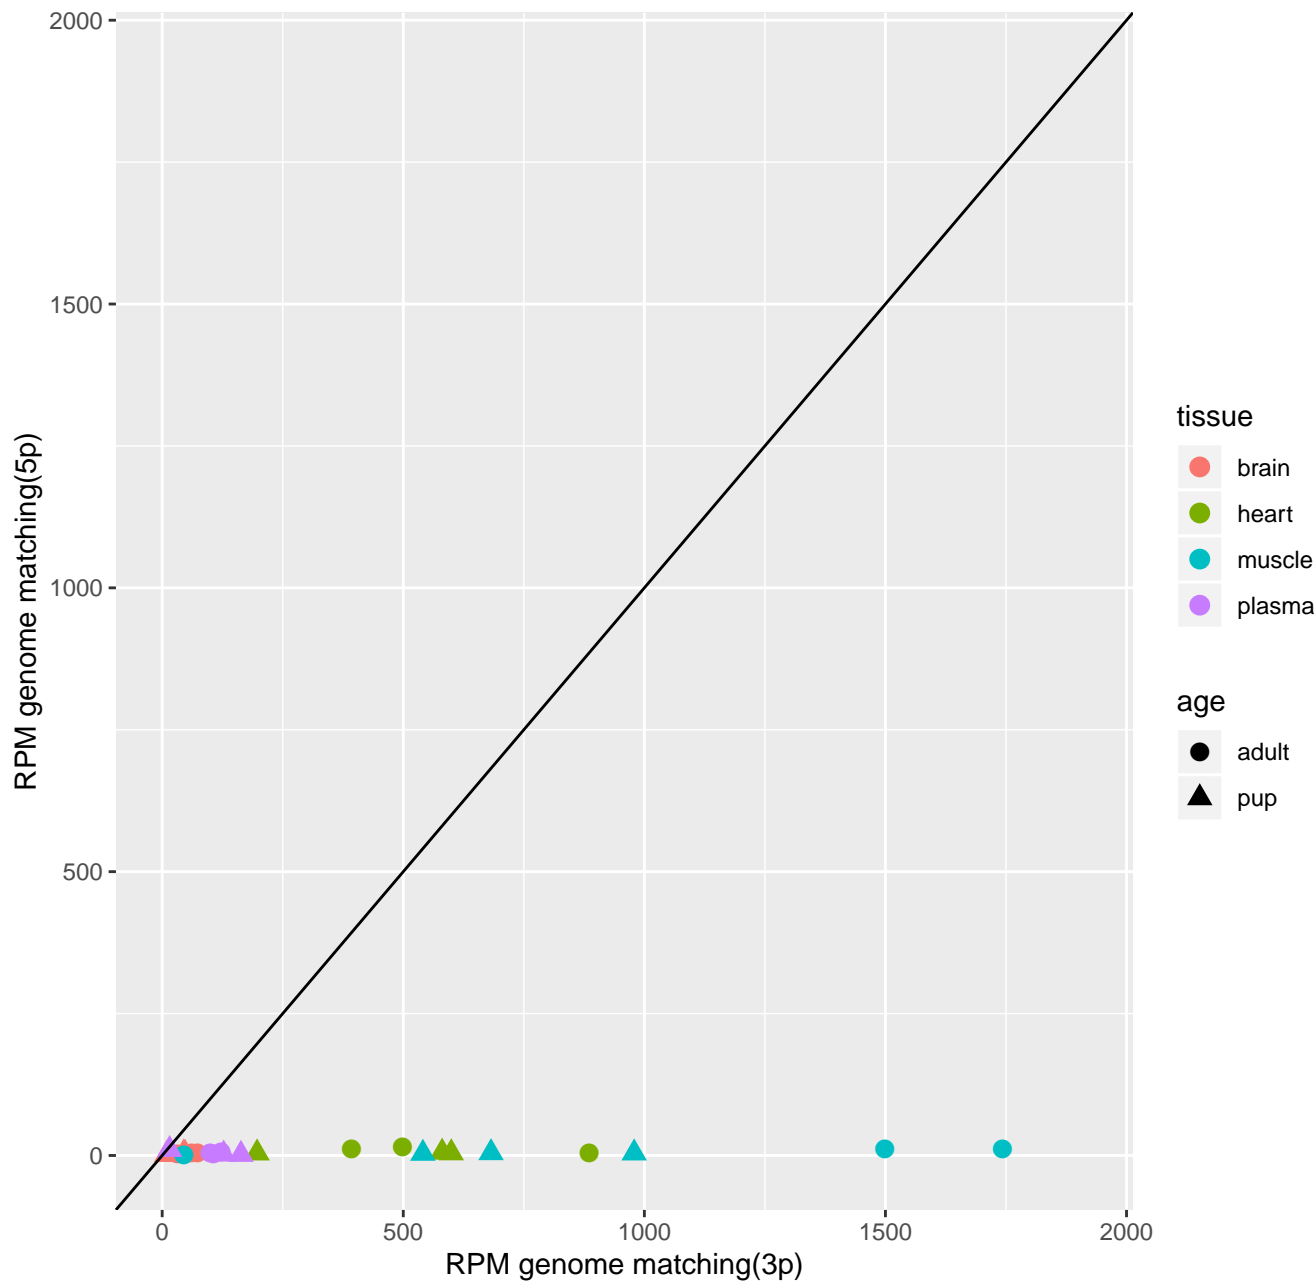

## lwe-miR-615\_loc1

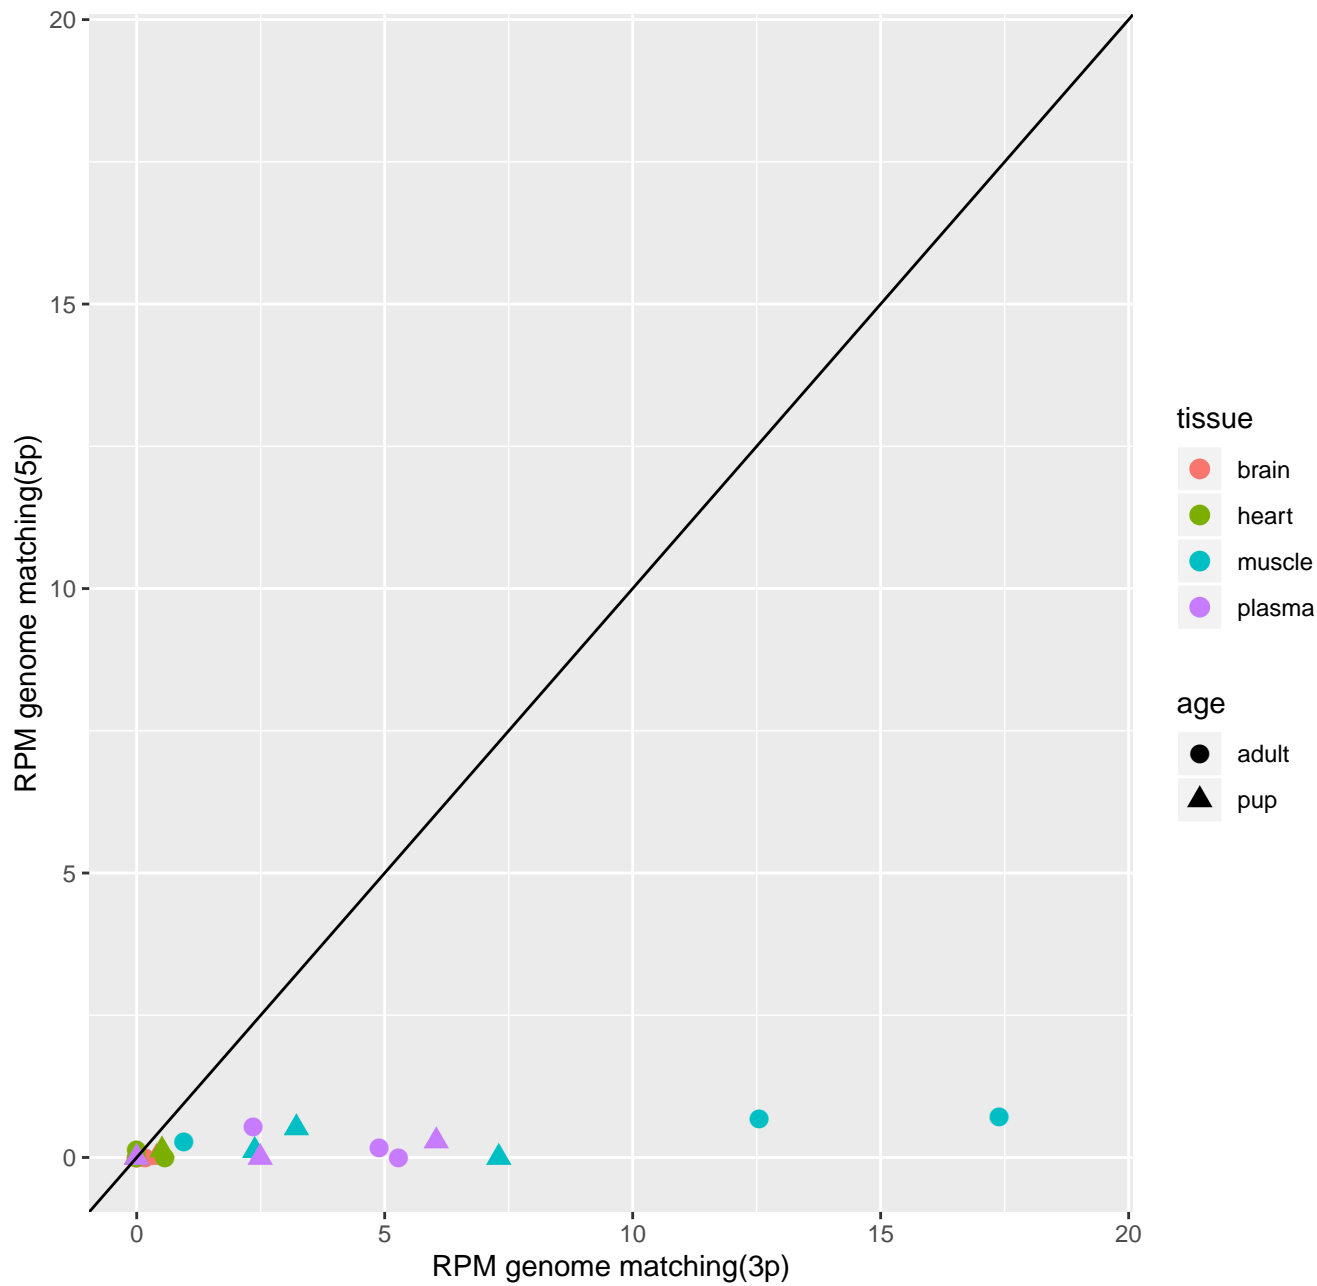

# lwe-miR-670\_loc1

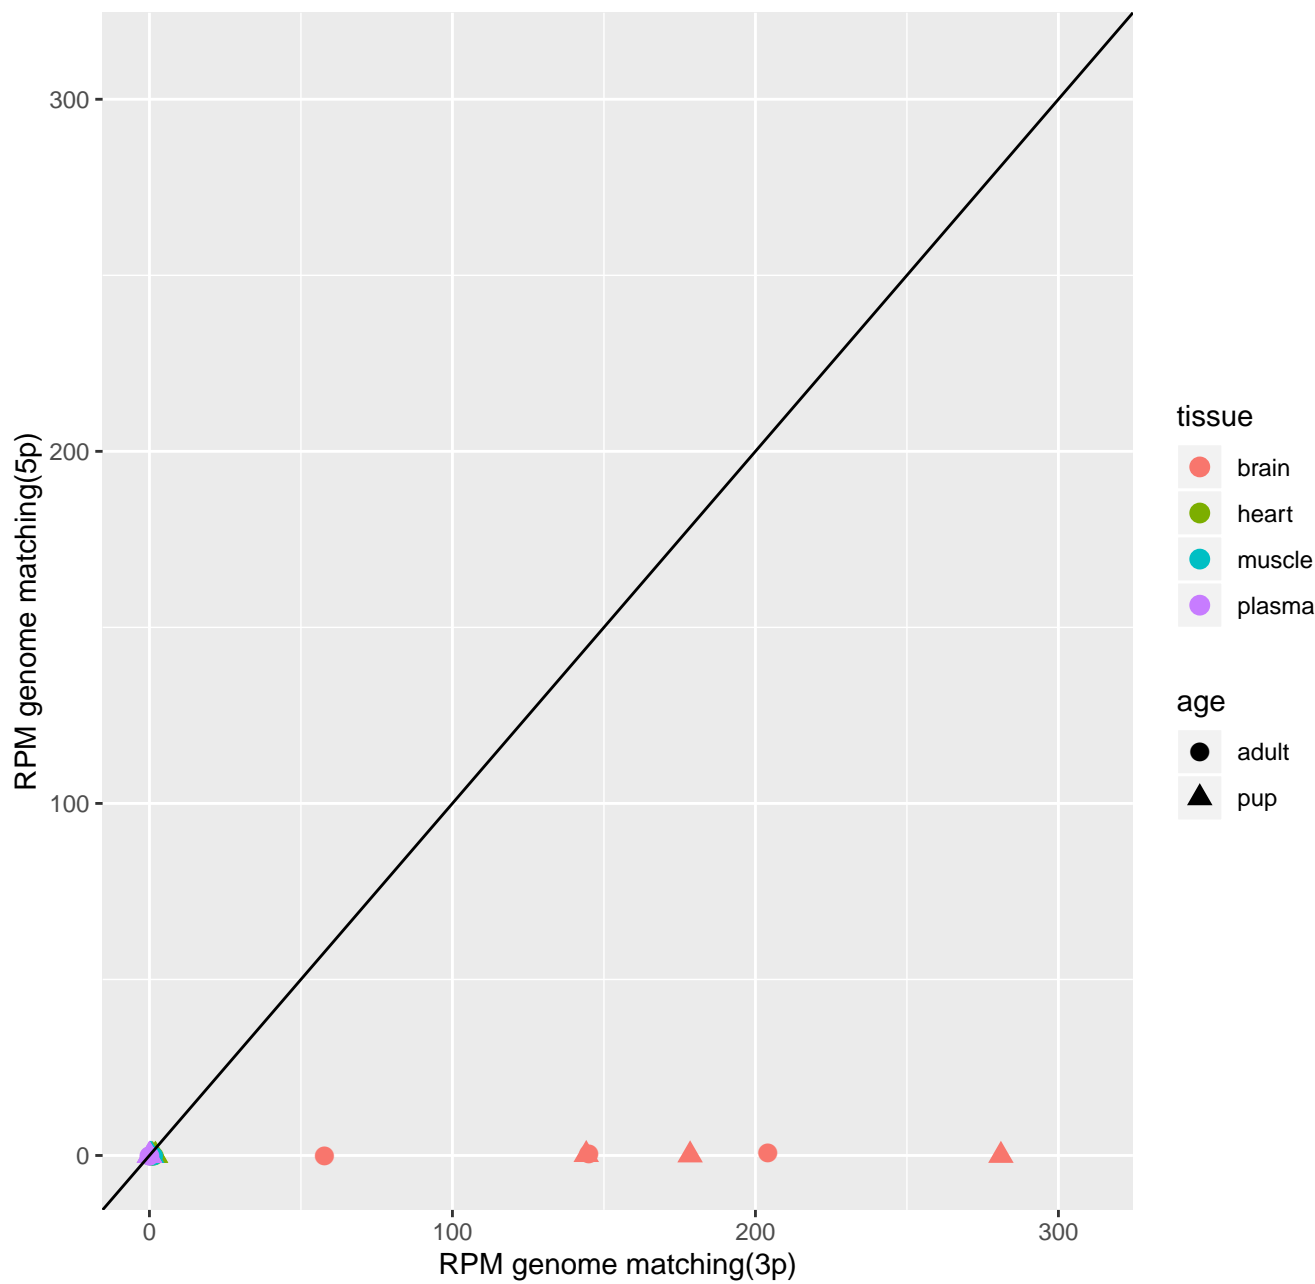

# lwe-miR-129\_loc1

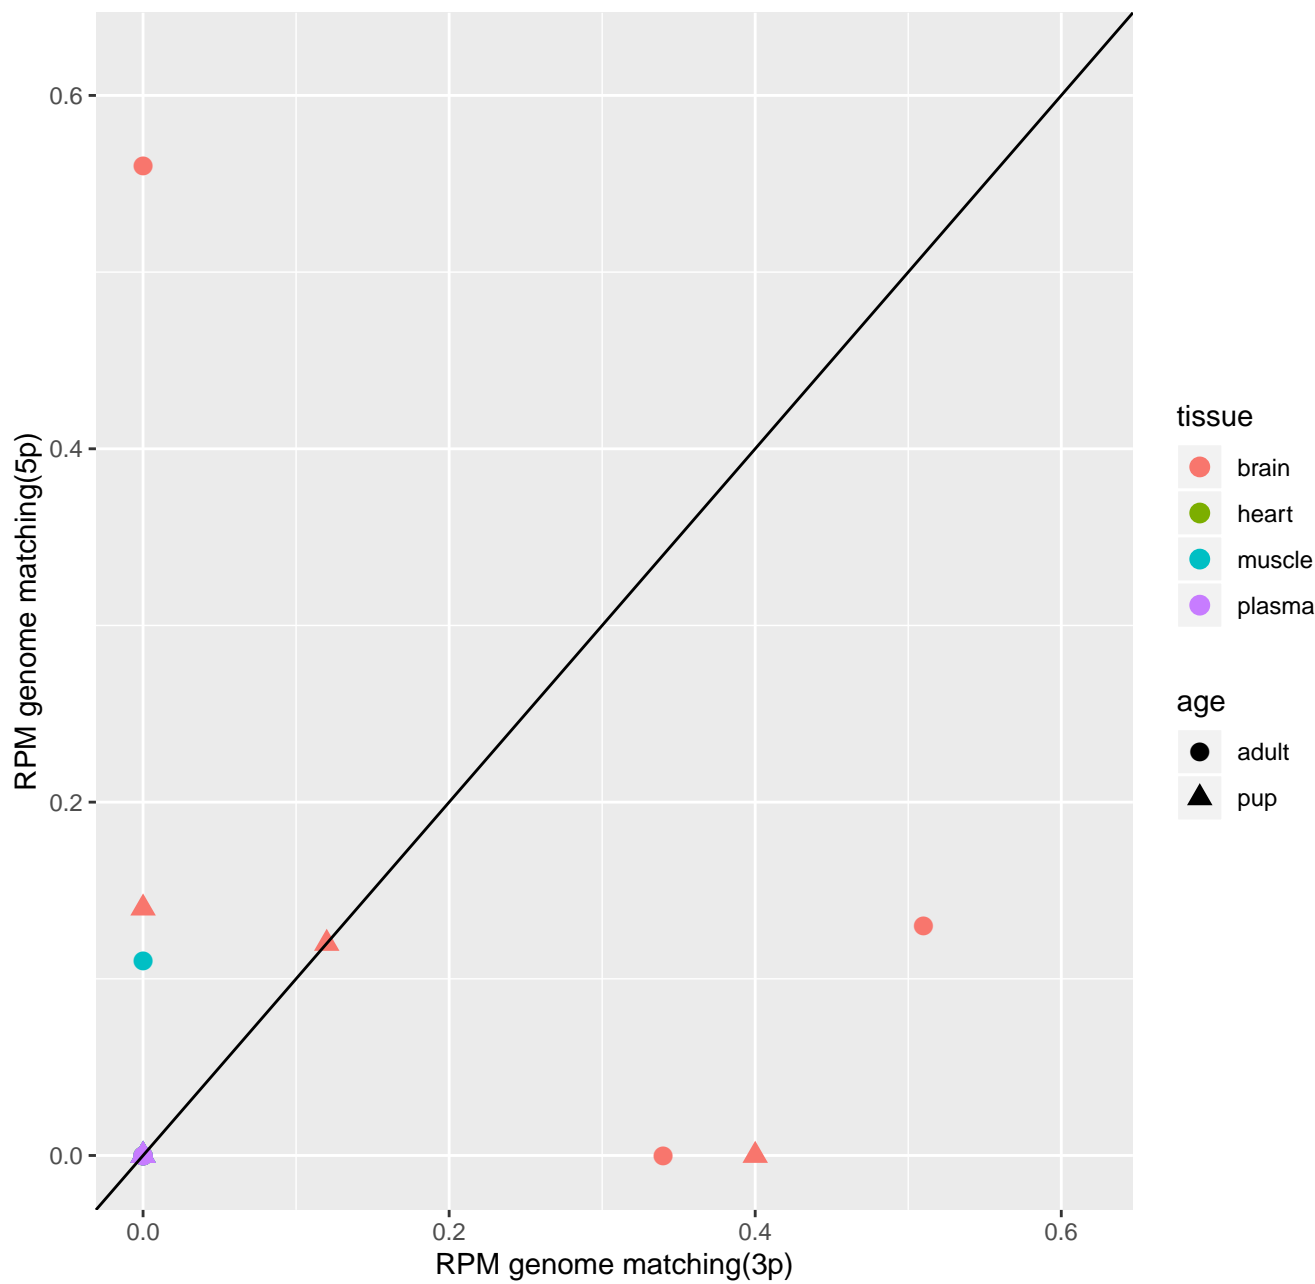

# WS\_miRDeep2\_novel\_10

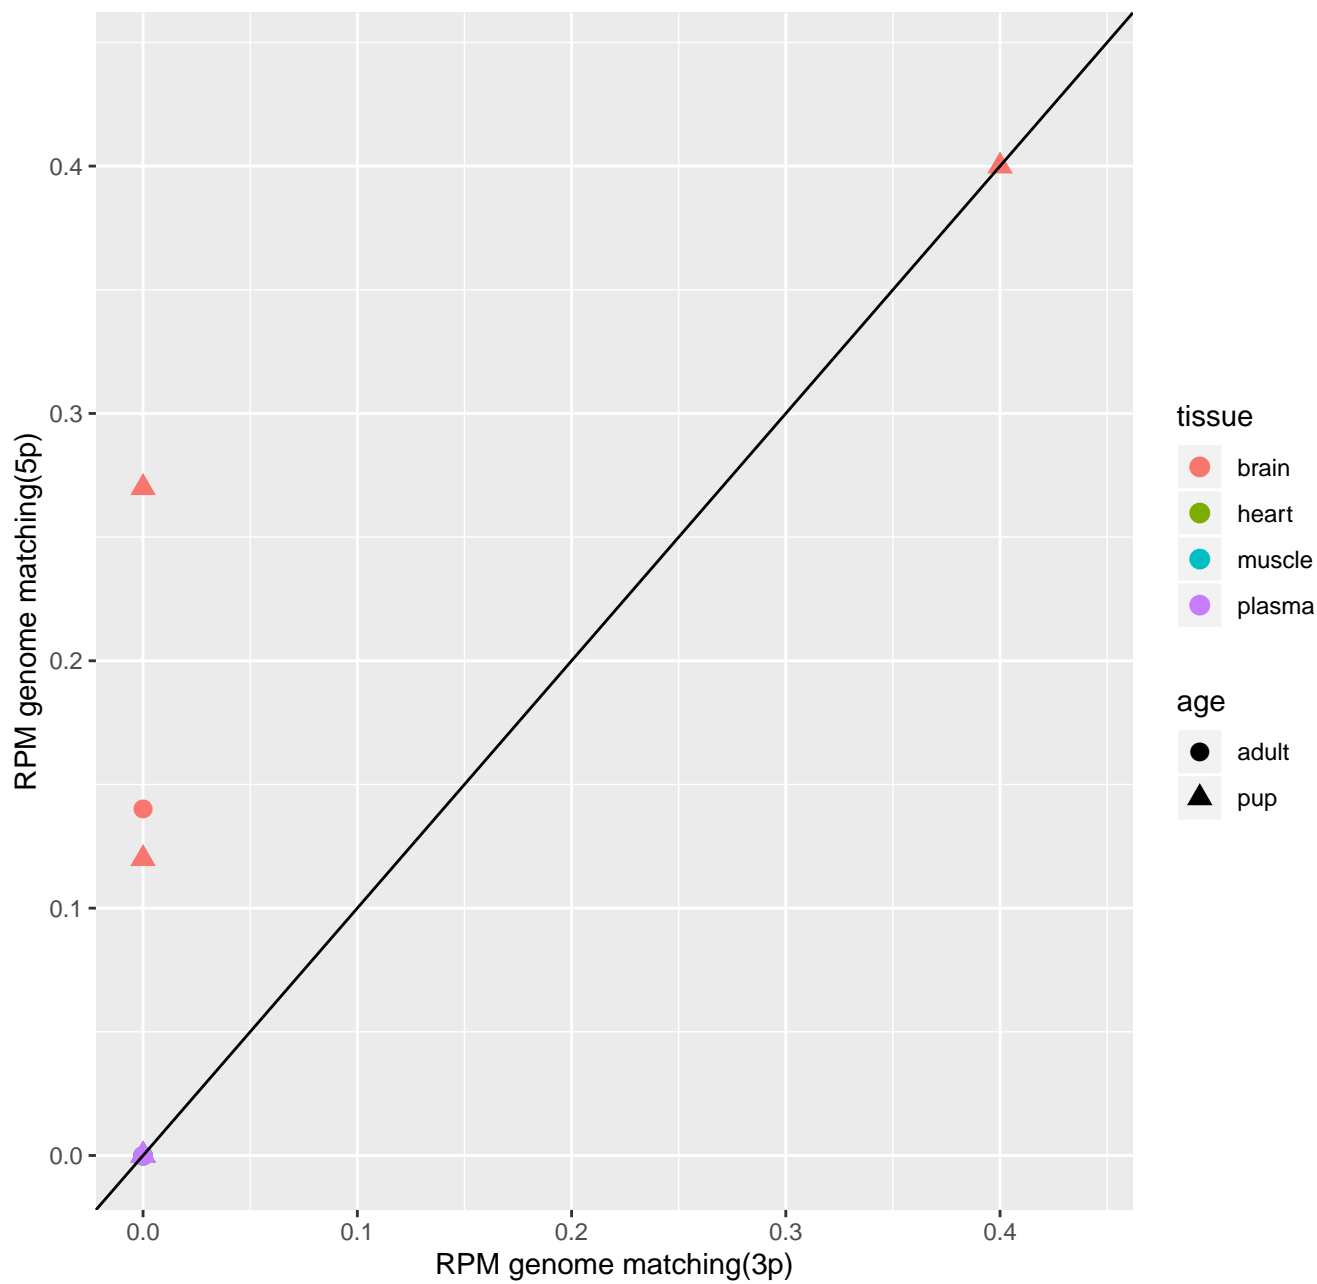



# WS\_miRDeep2\_novel\_11

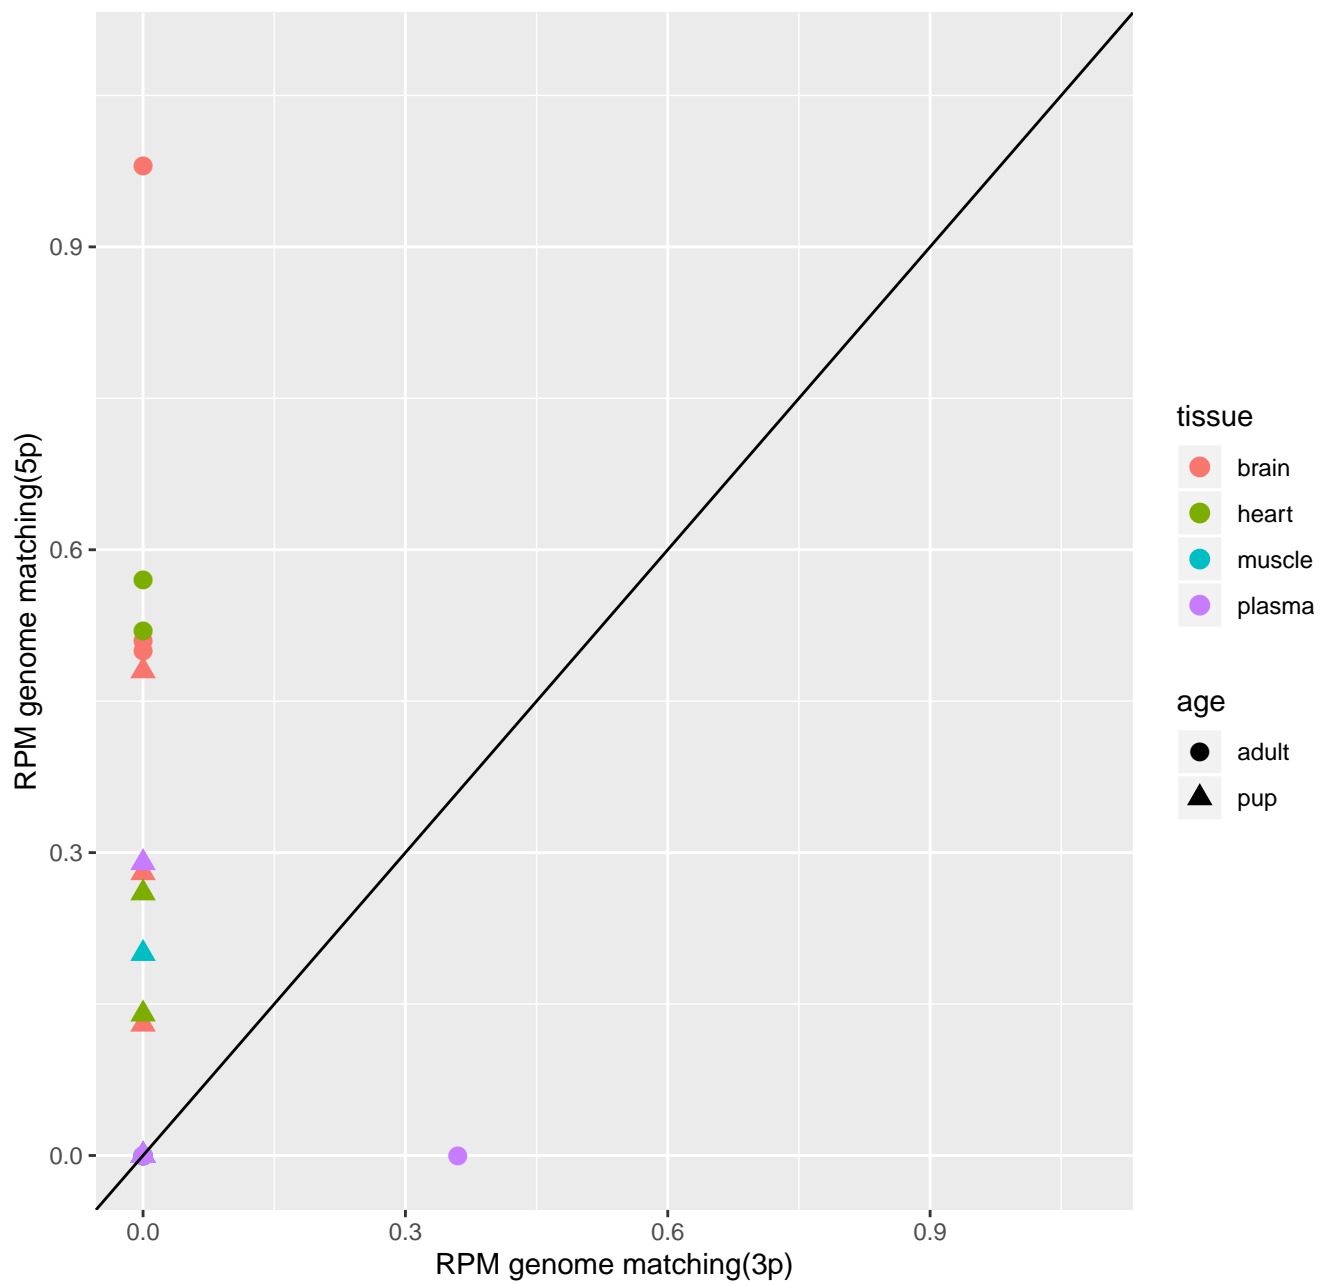

WS\_miRDeep2\_novel\_12

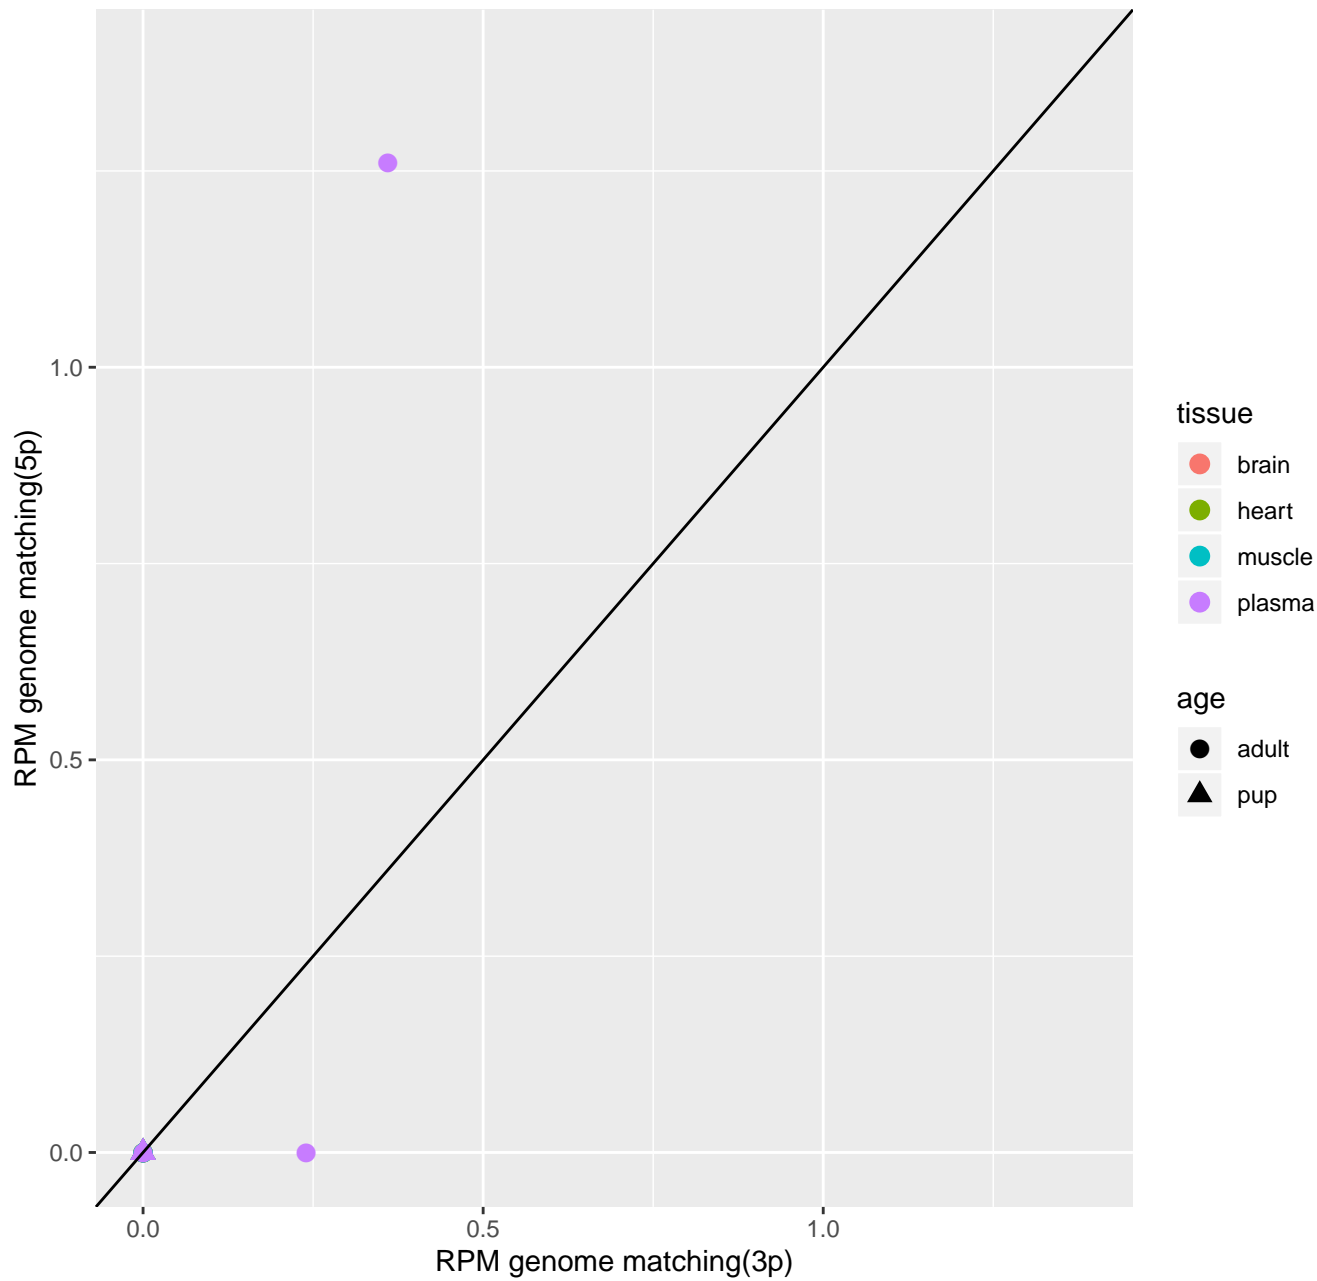

# lwe-miR-182\_miRDeep2\_loc1

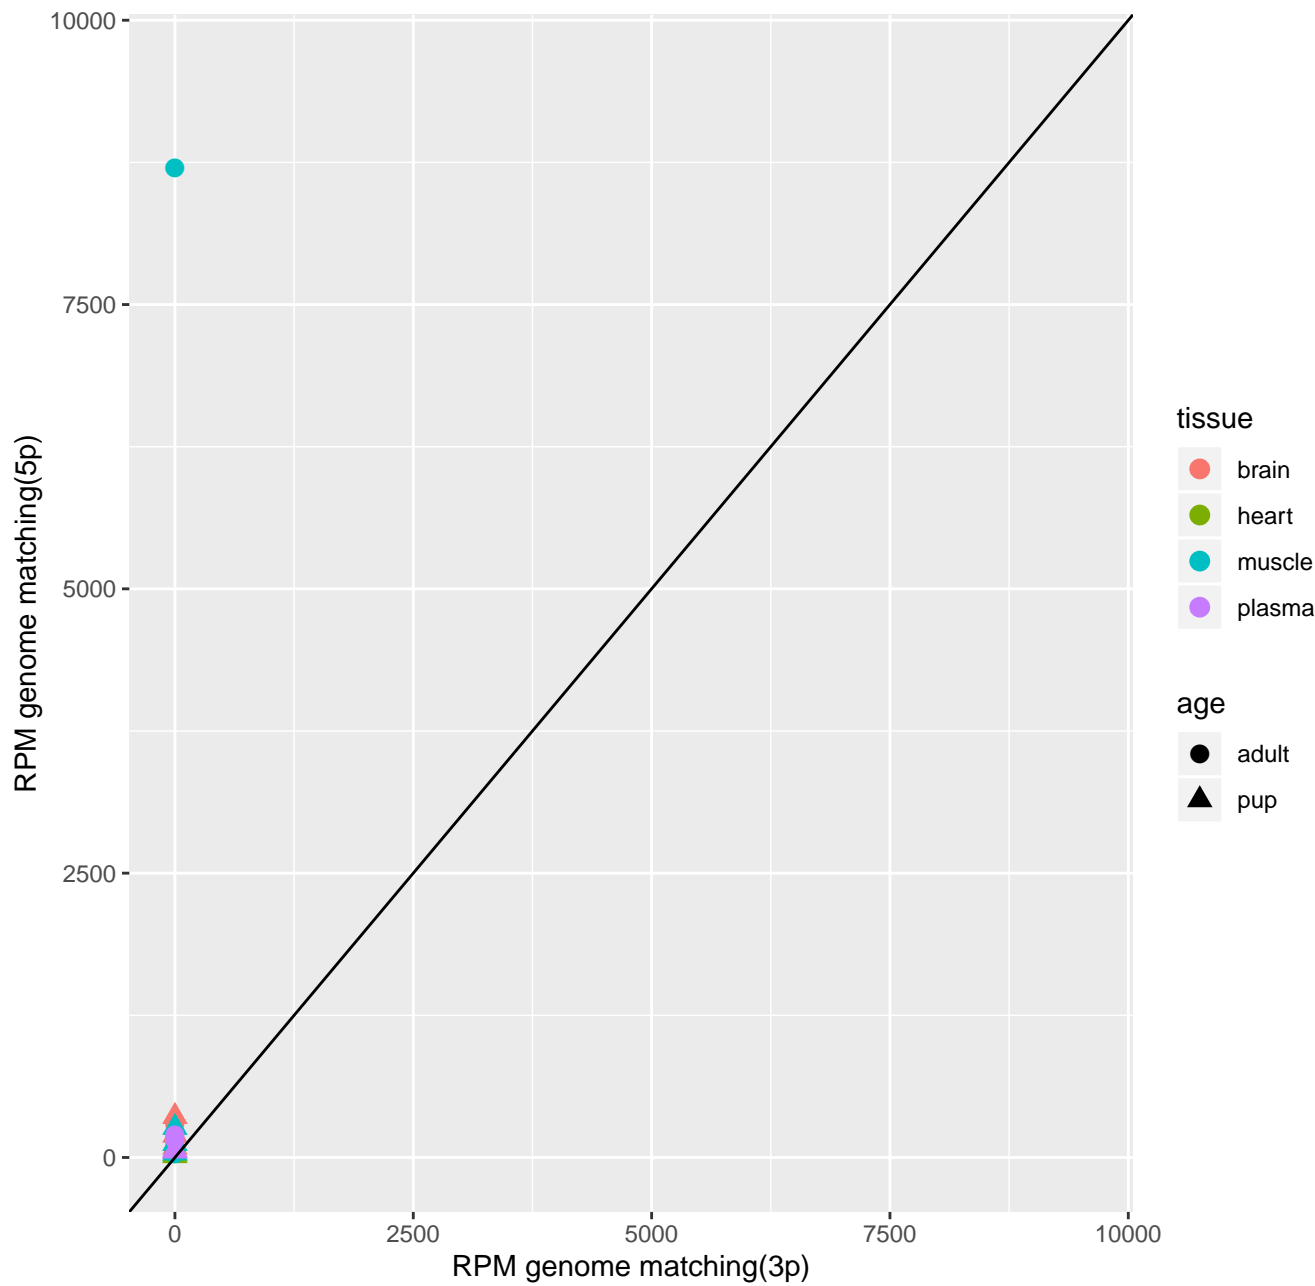

# WS\_miRDeep2\_novel\_13

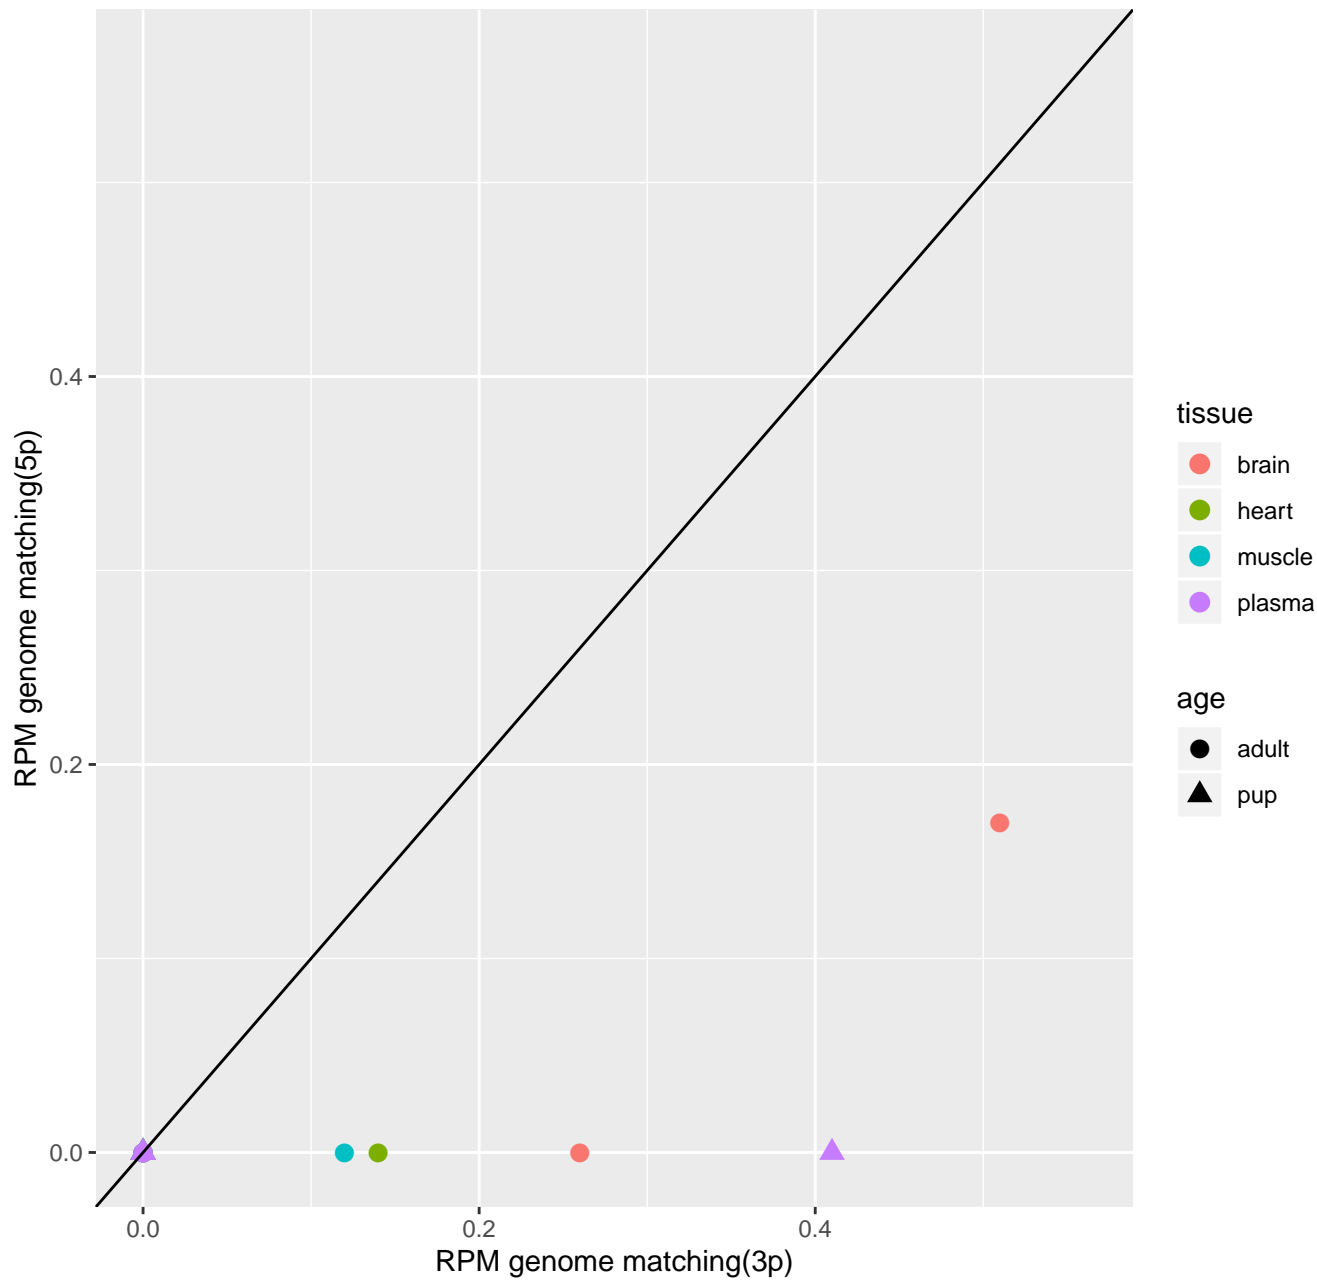

# WS\_miRDeep2\_novel\_14

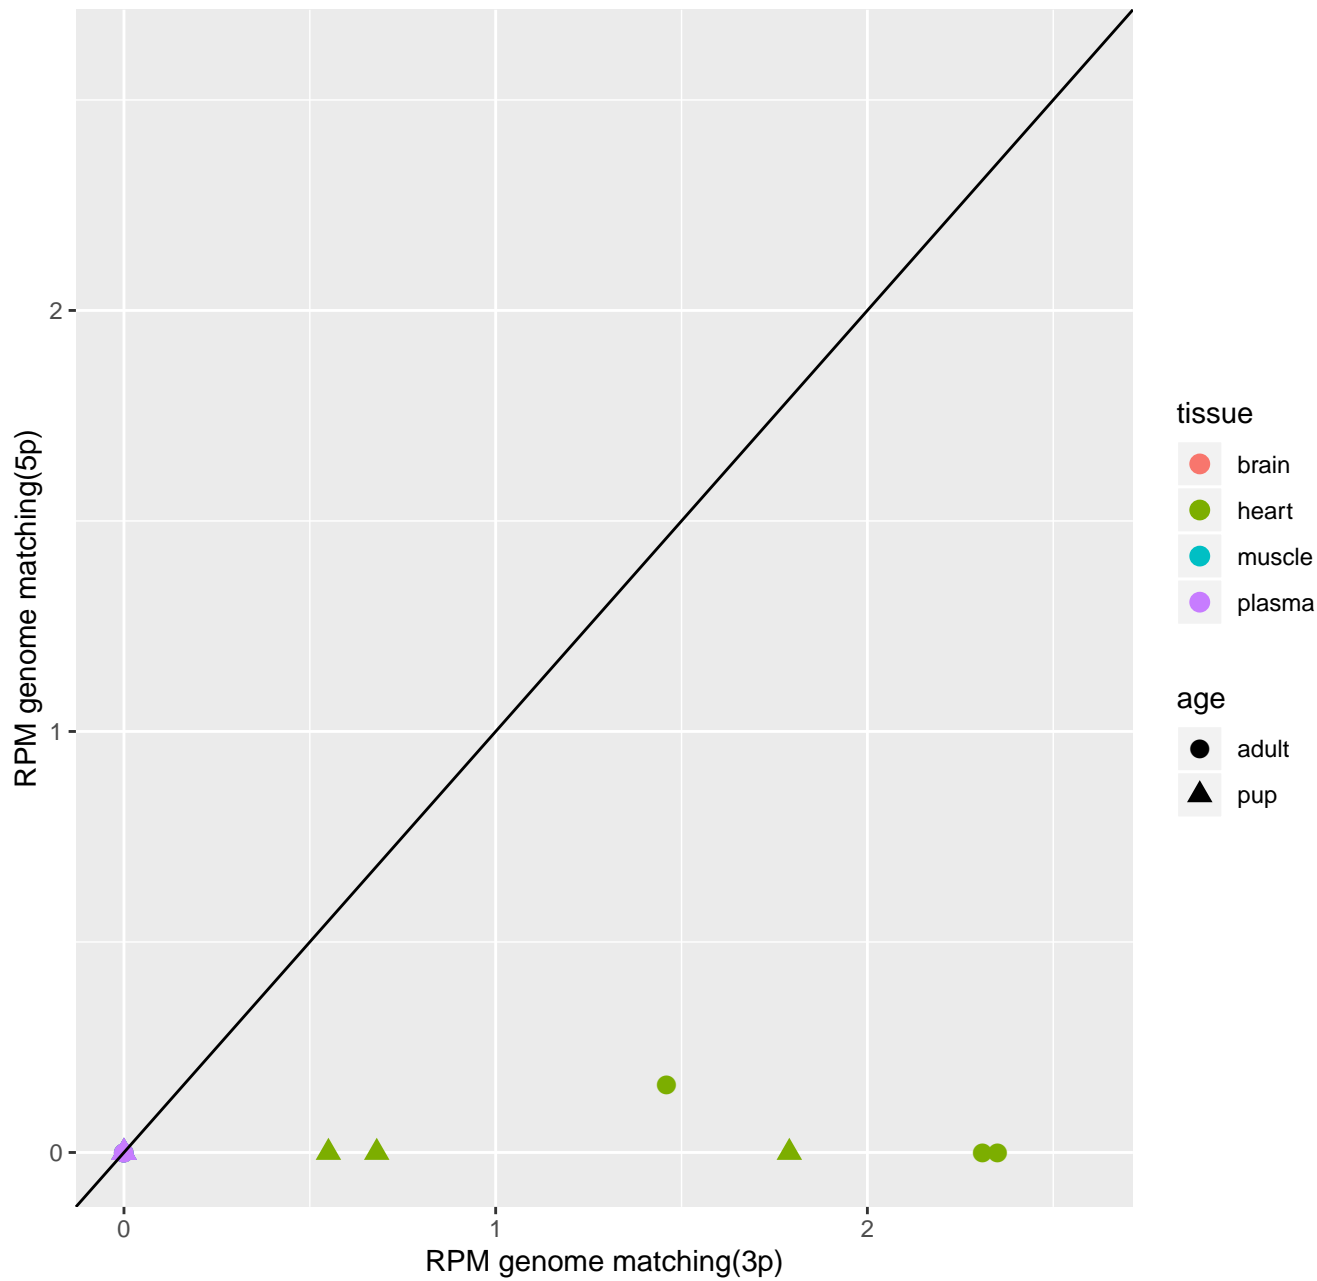

# WS\_miRDeep2\_novel\_15

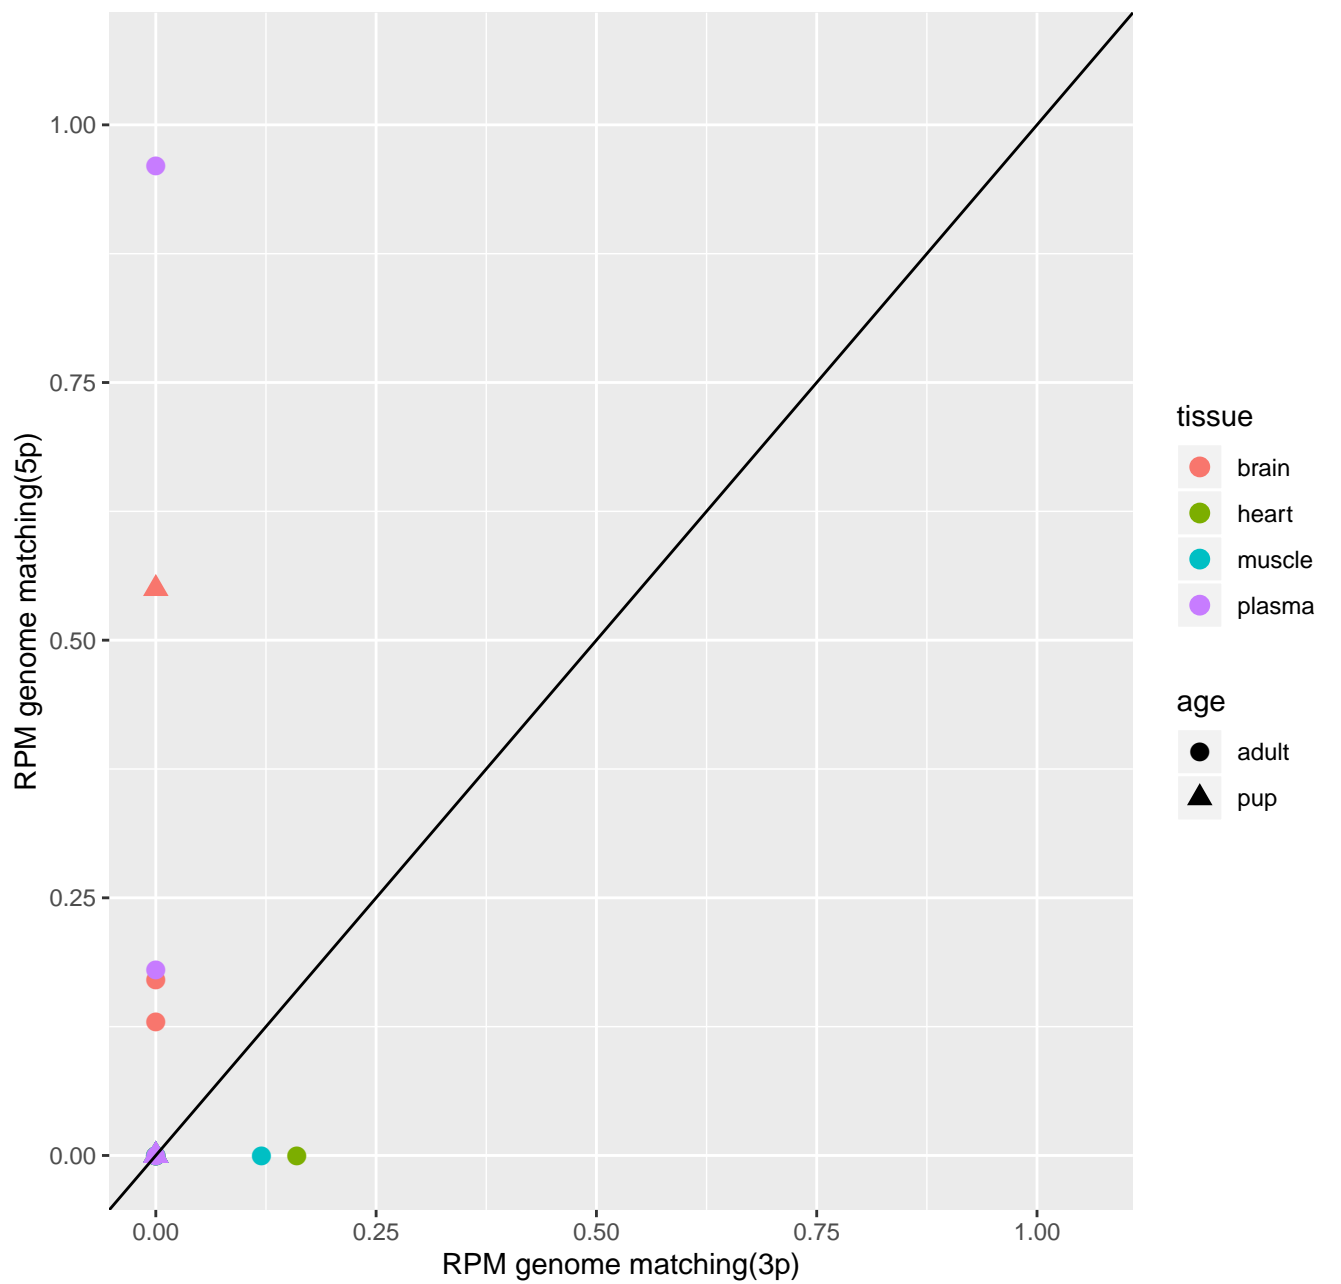

WS\_miRDeep2\_novel\_16

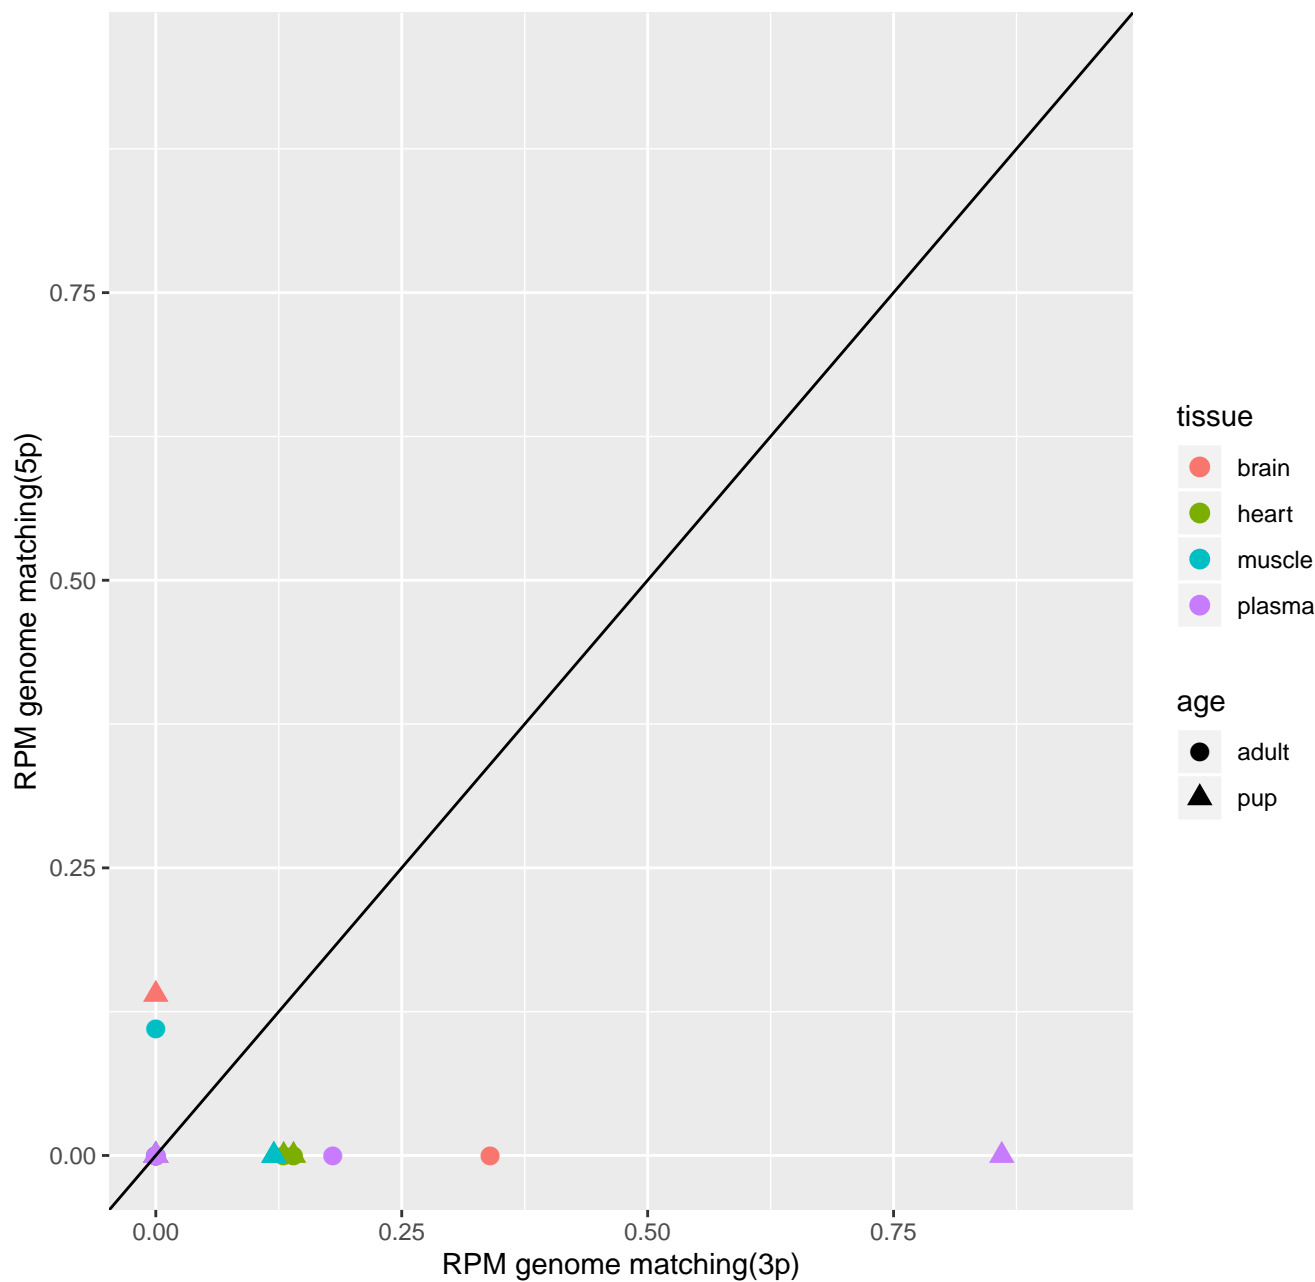

## WS\_miRDeep2\_novel\_17

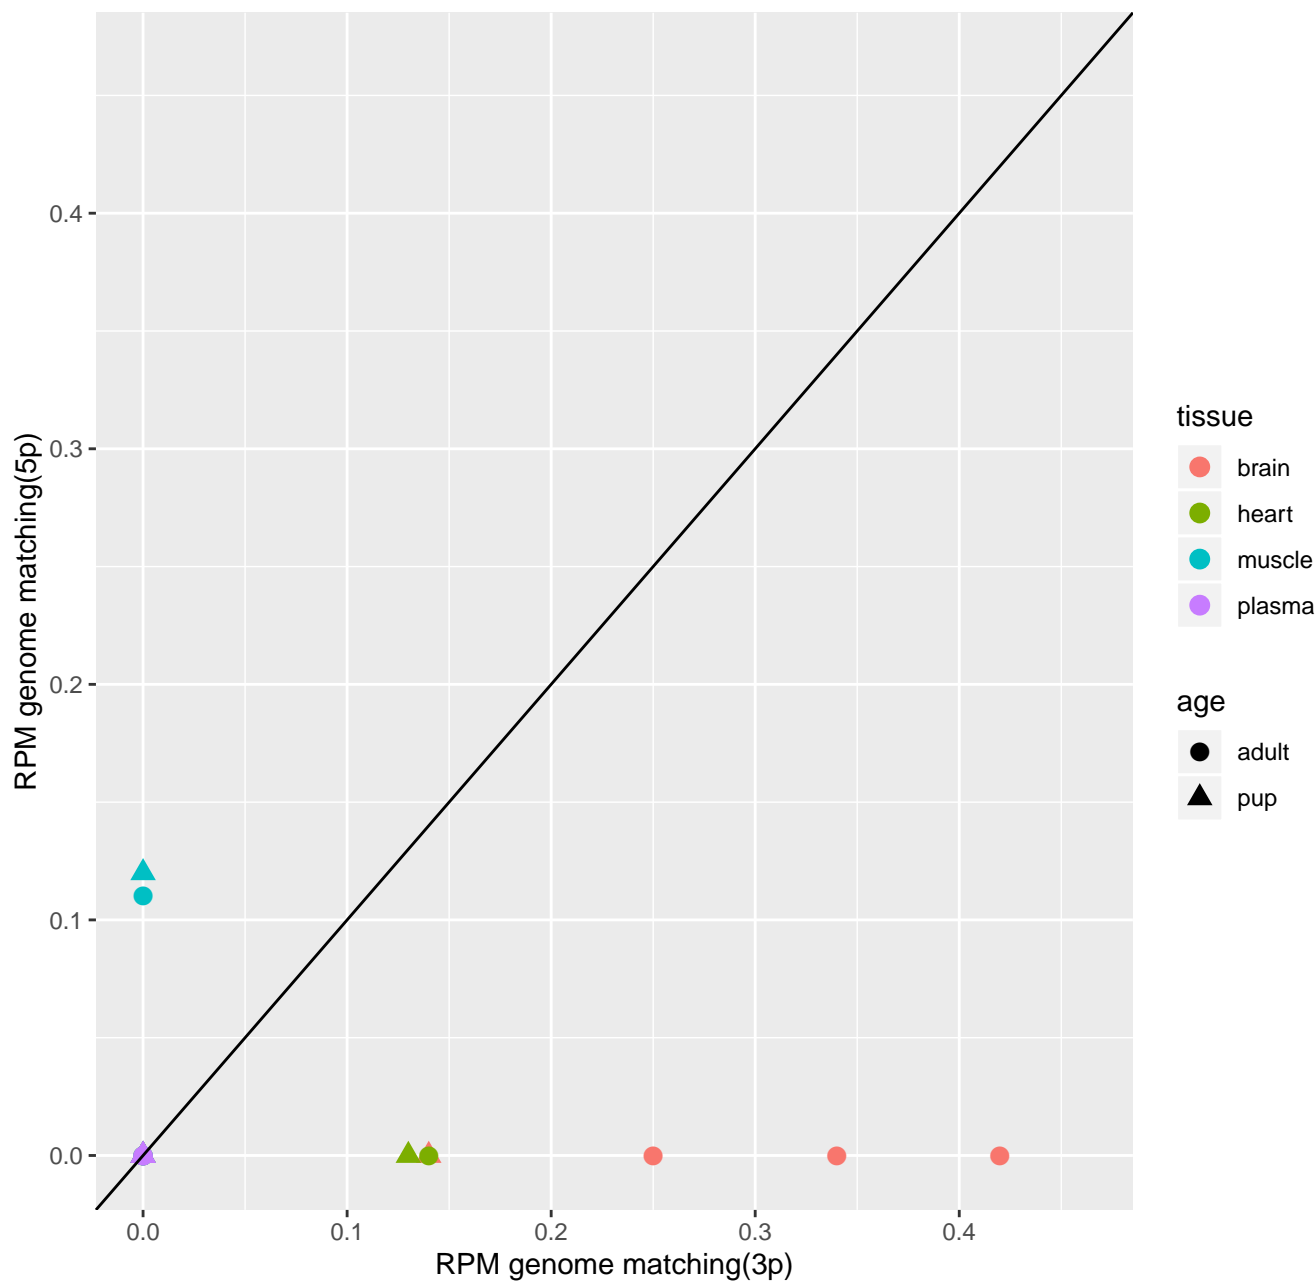



WS\_miRDeep2\_novel\_18

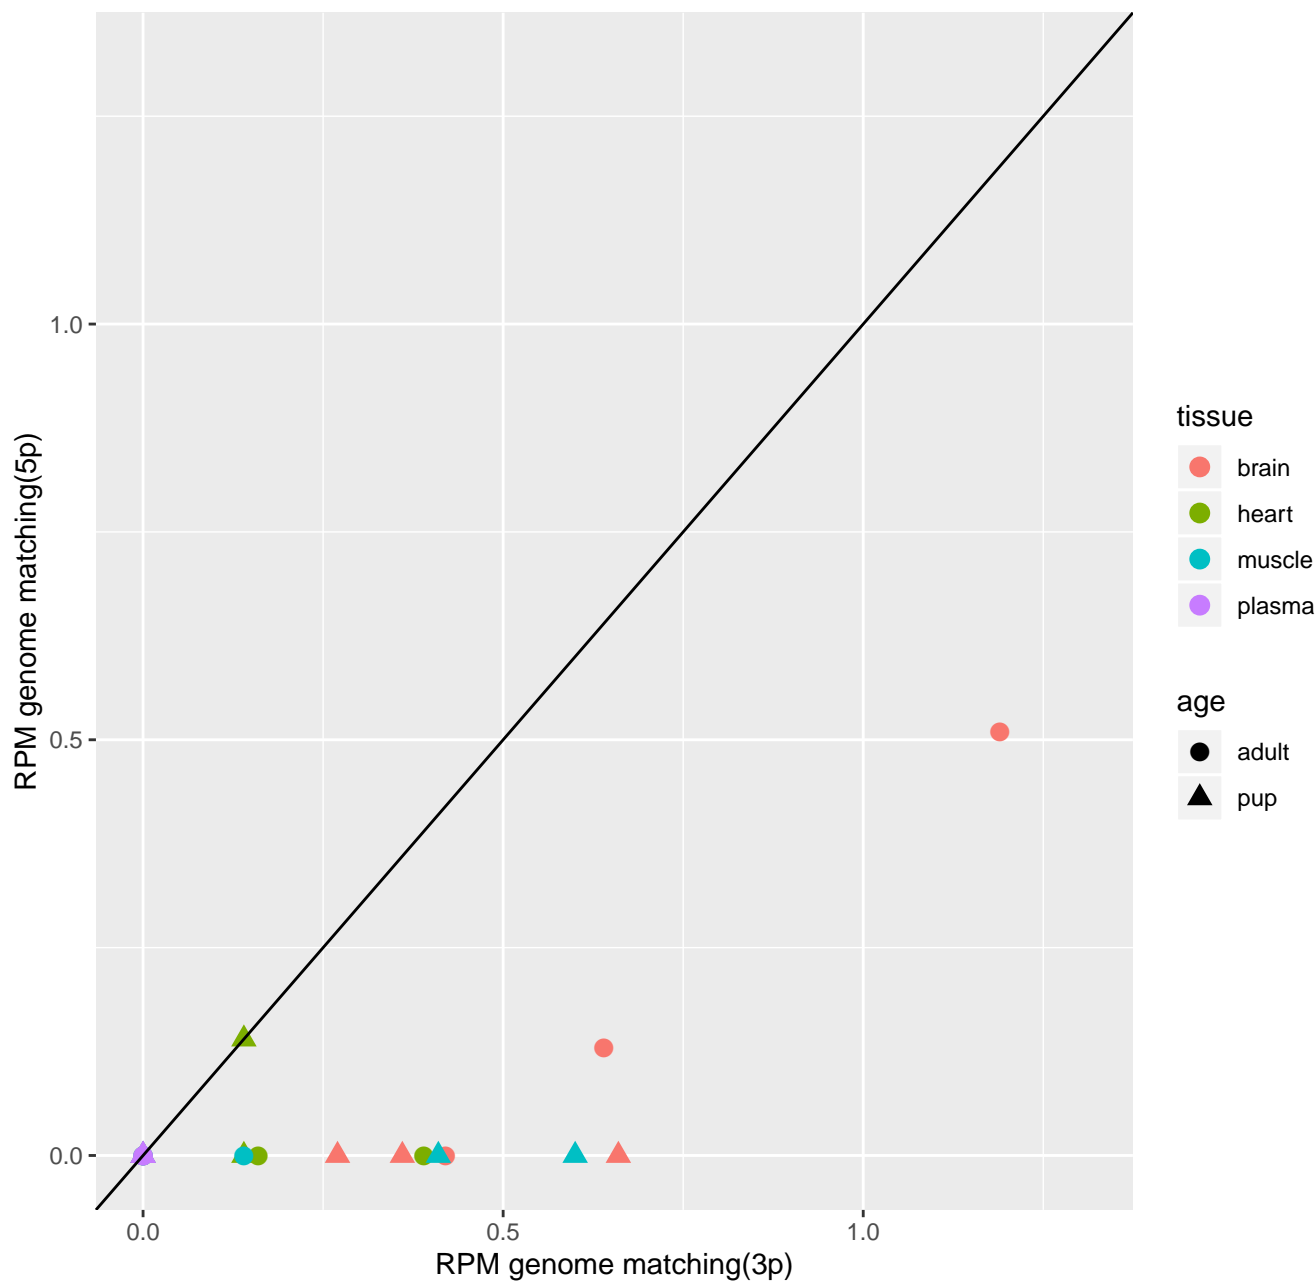

## lwe-miR-146b\_miRDeep2\_loc1

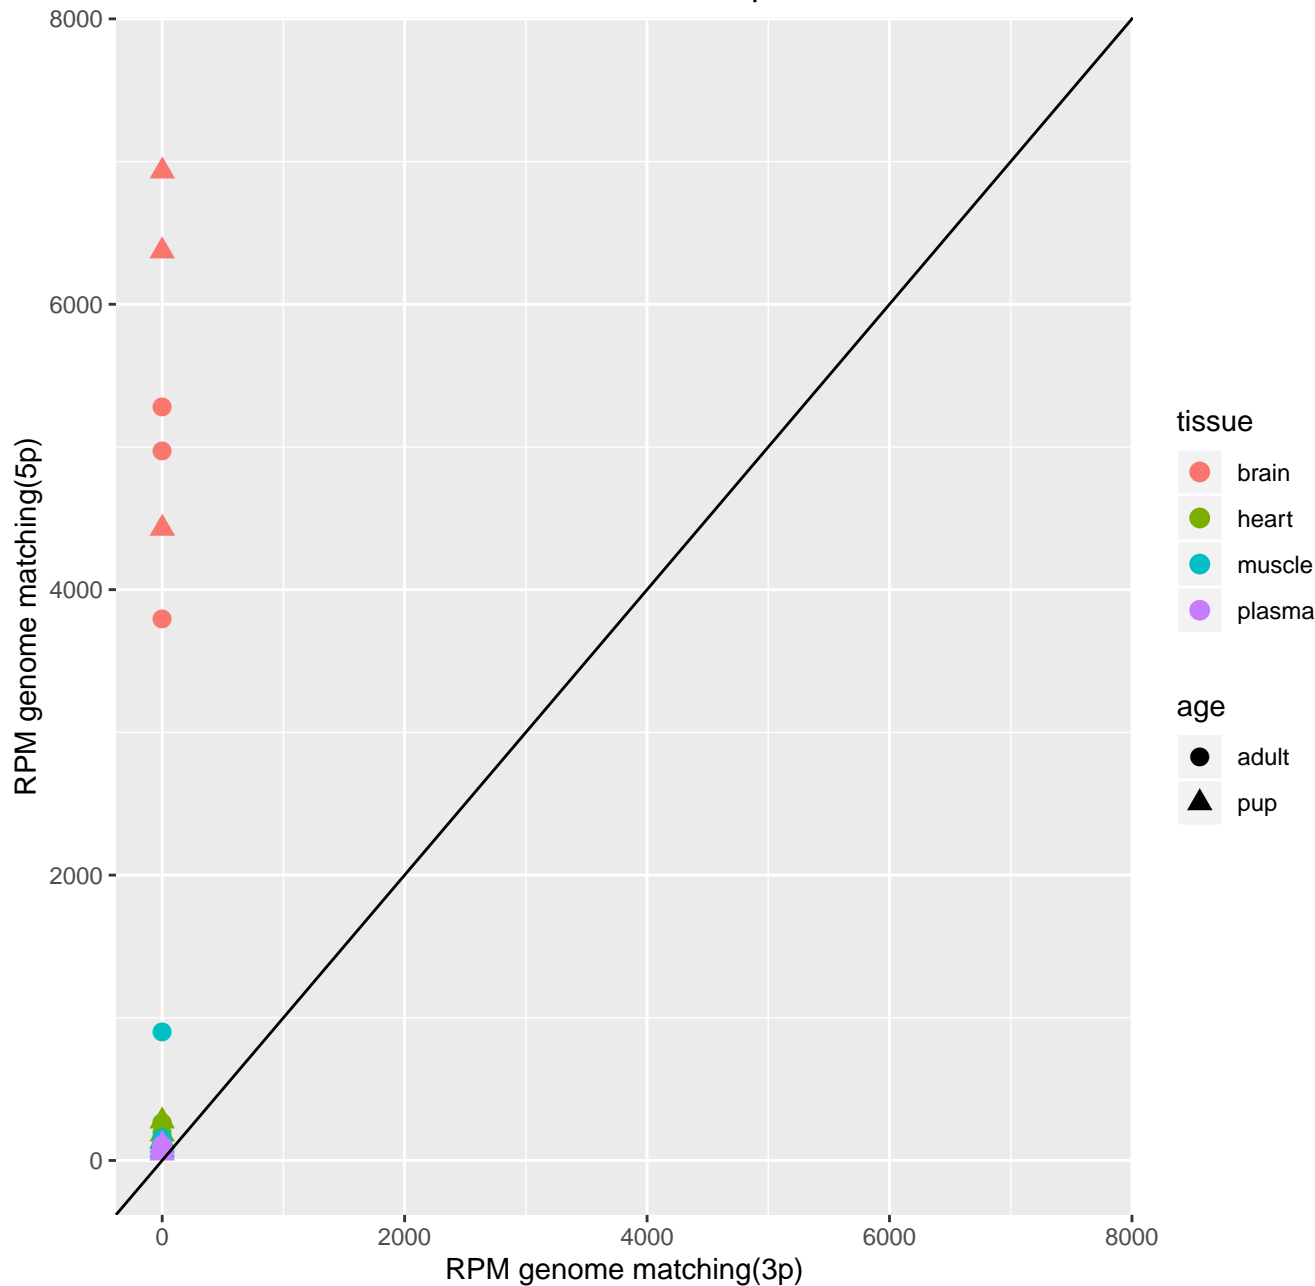

lwe-miR-141;lwe-miR-200a;lwe-miR-3548\_loc1"

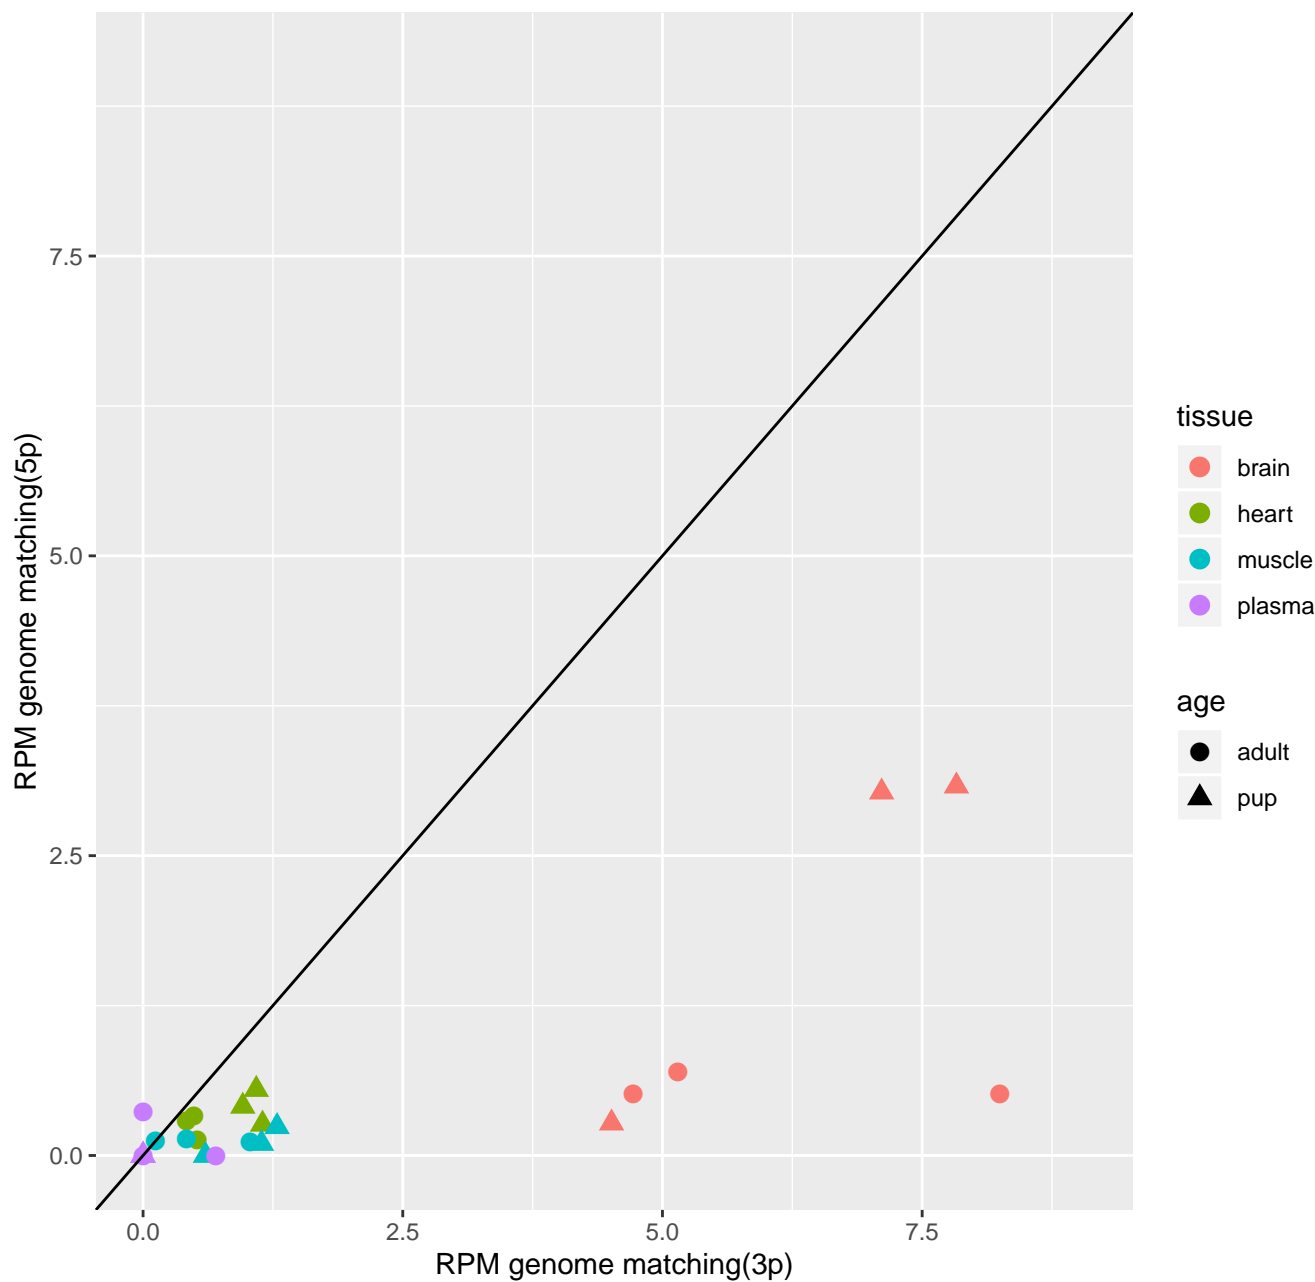

## lwe-miR-302a\_miRDeep2\_loc1

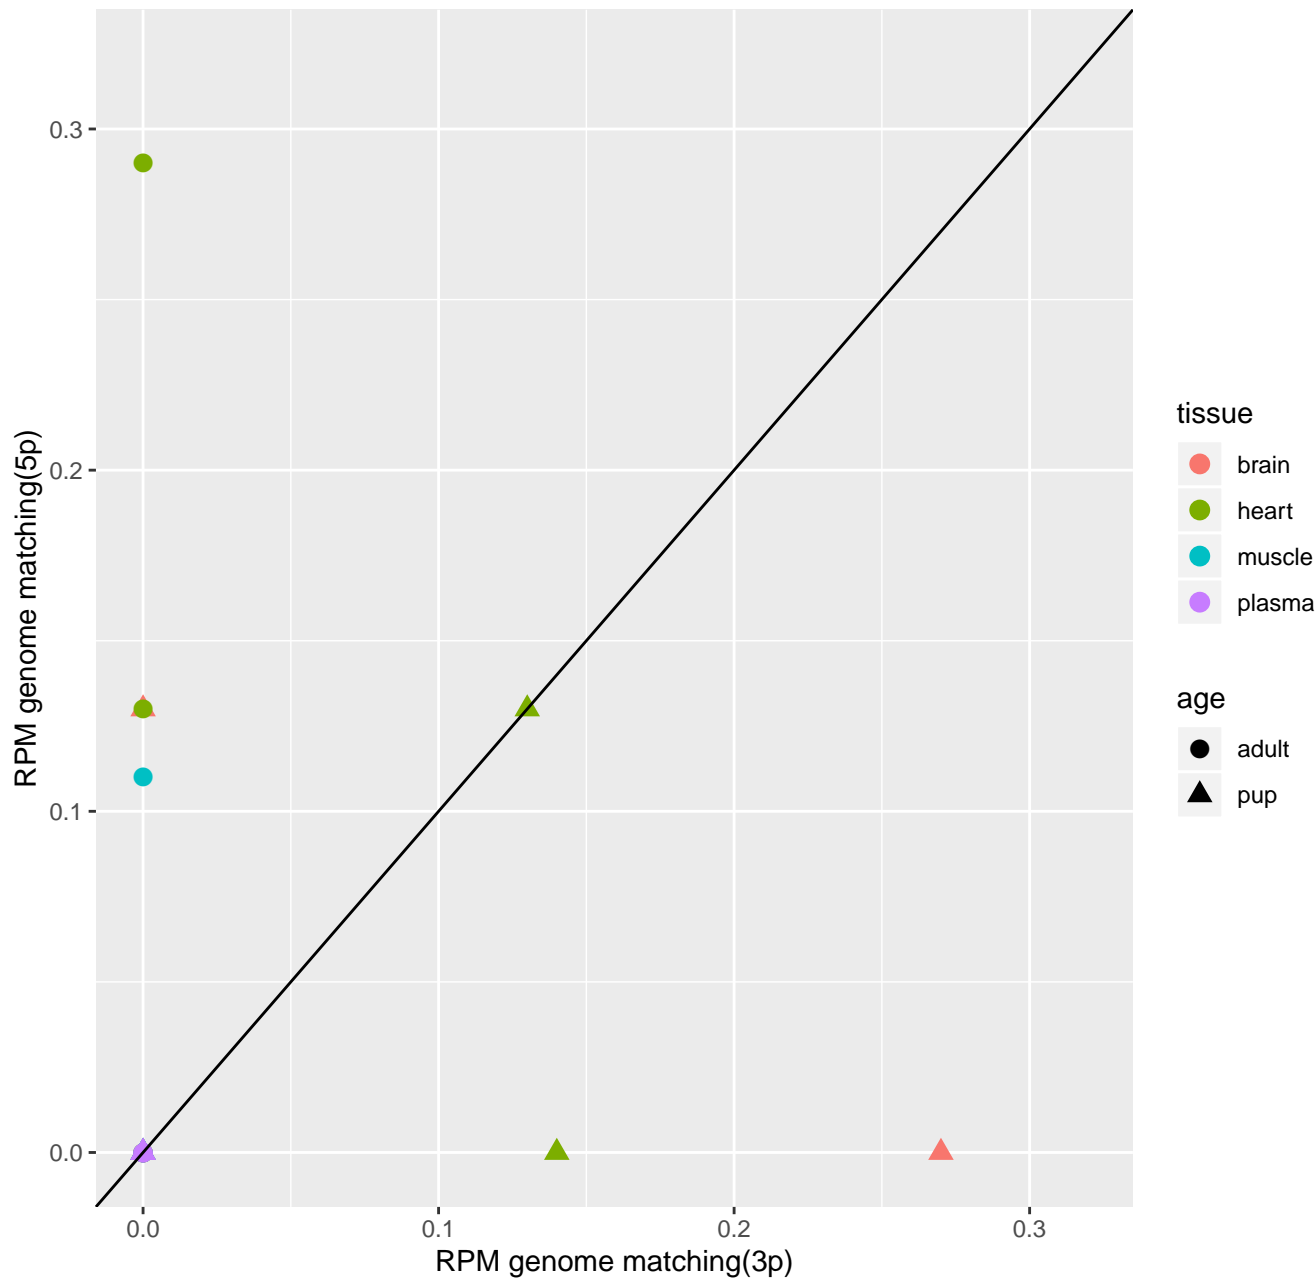

# WS\_miRDeep2\_novel\_20

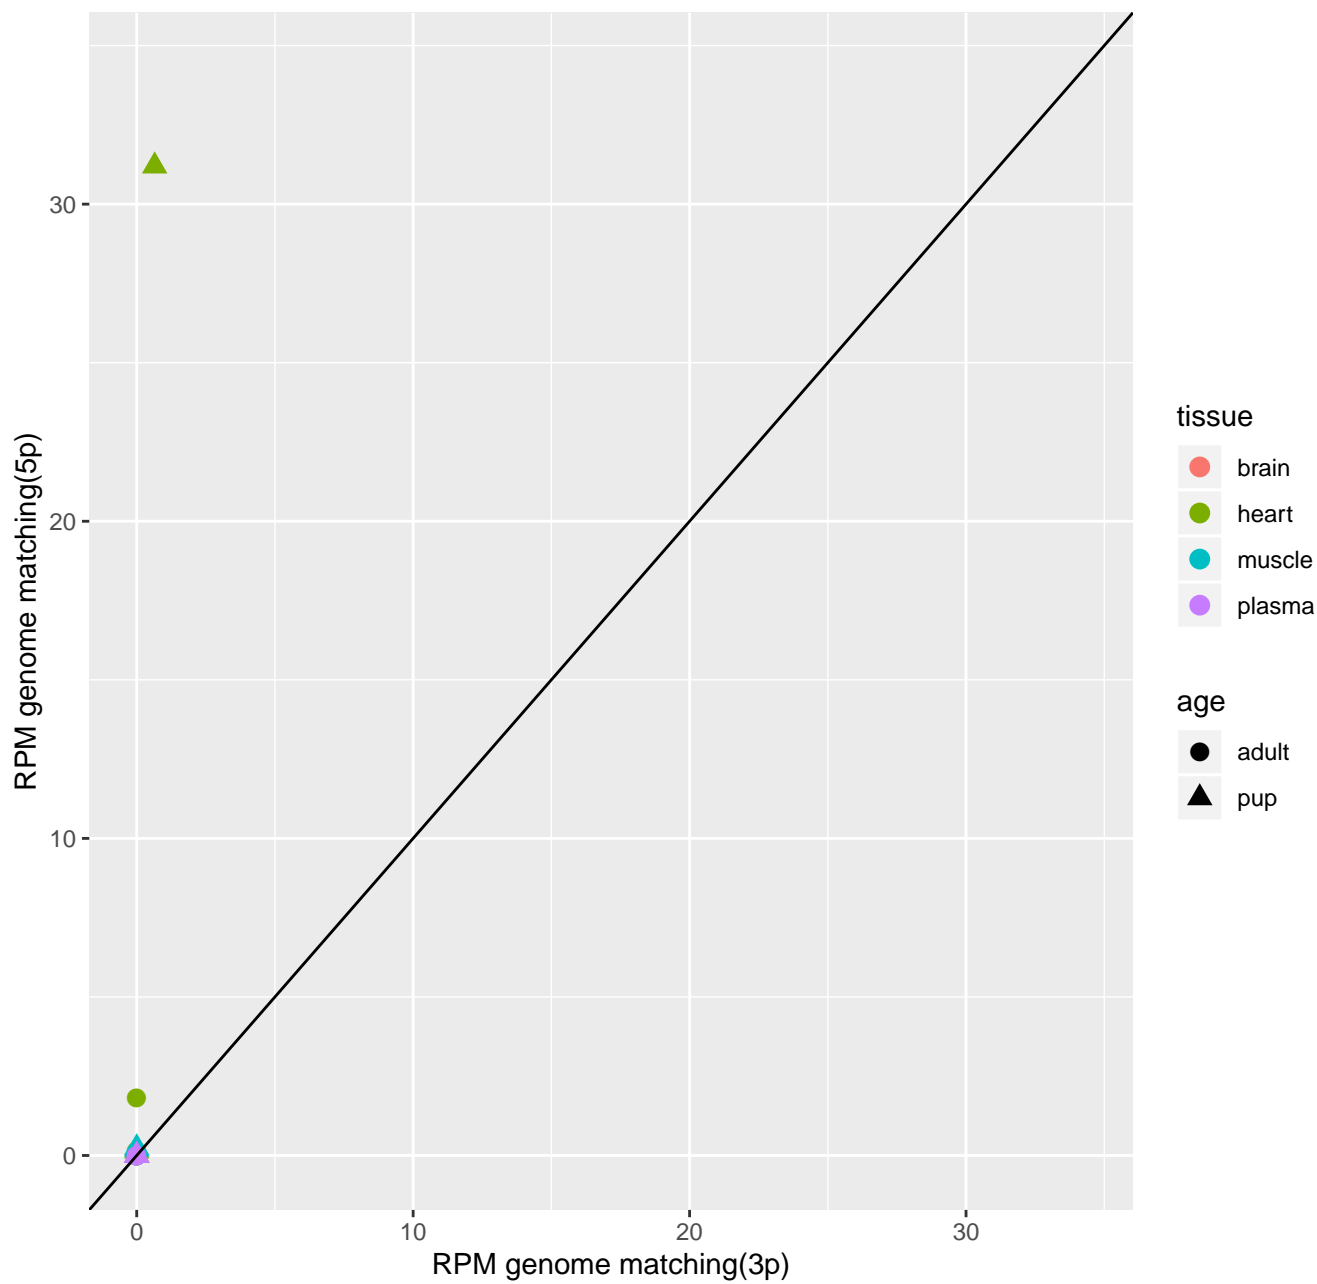

# lwe-miR-79;lwe-miR-9\_loc1"

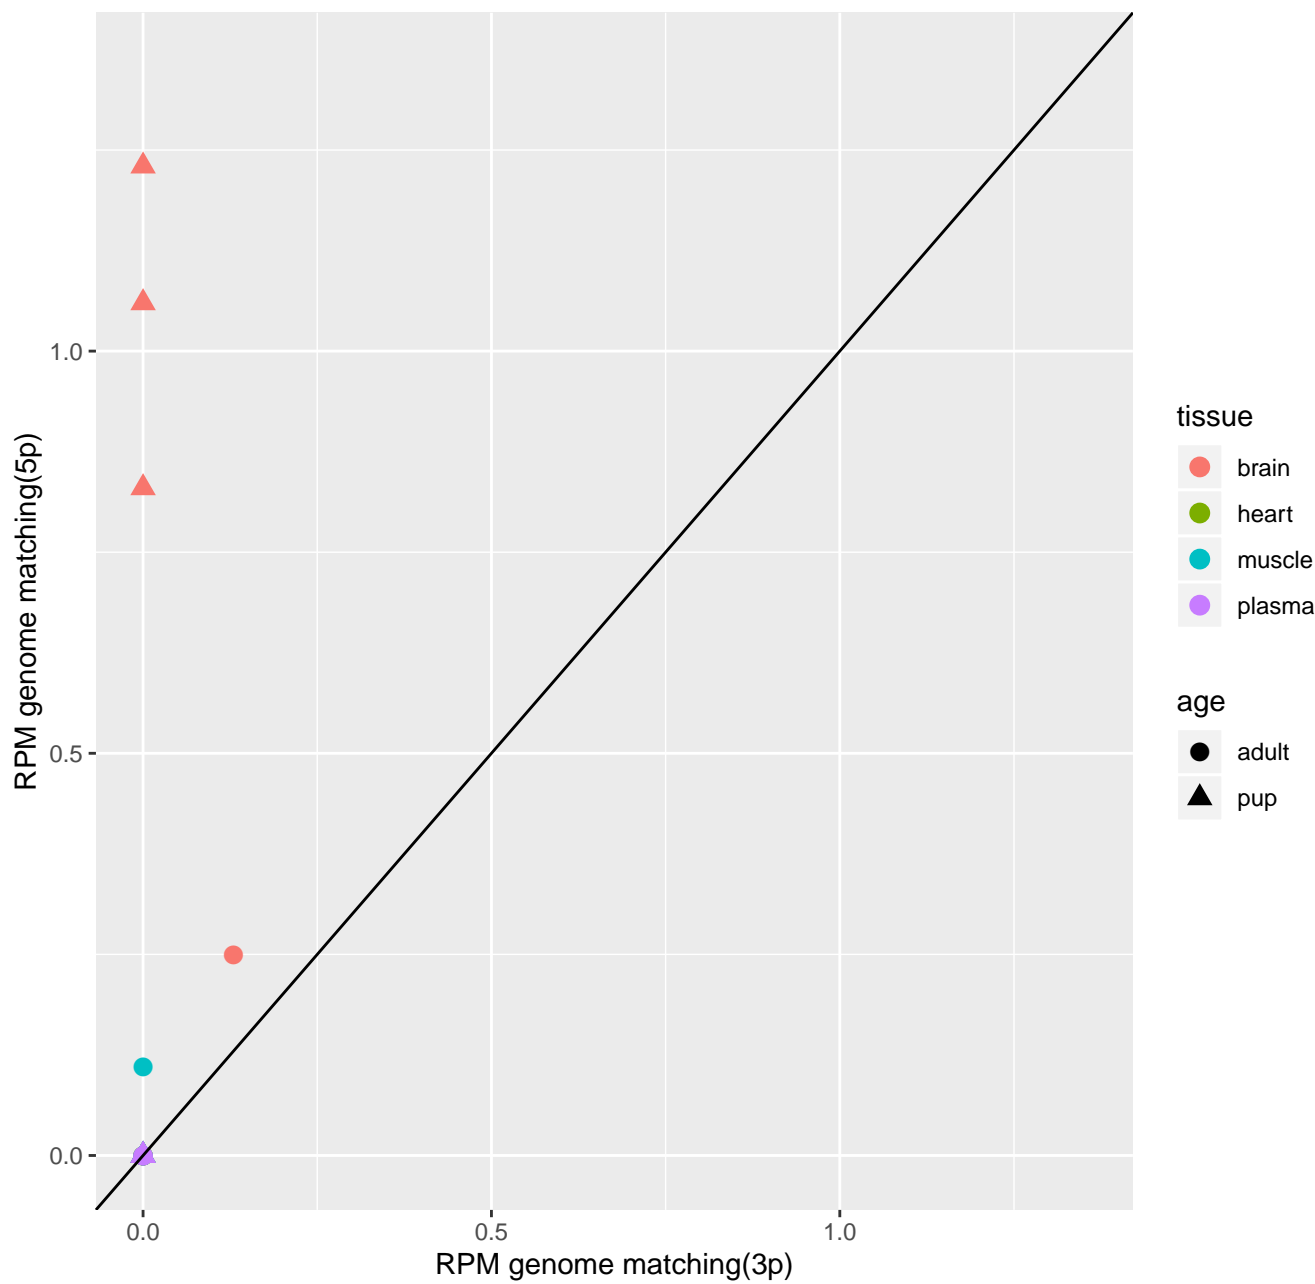

# WS\_miRDeep2\_novel\_22

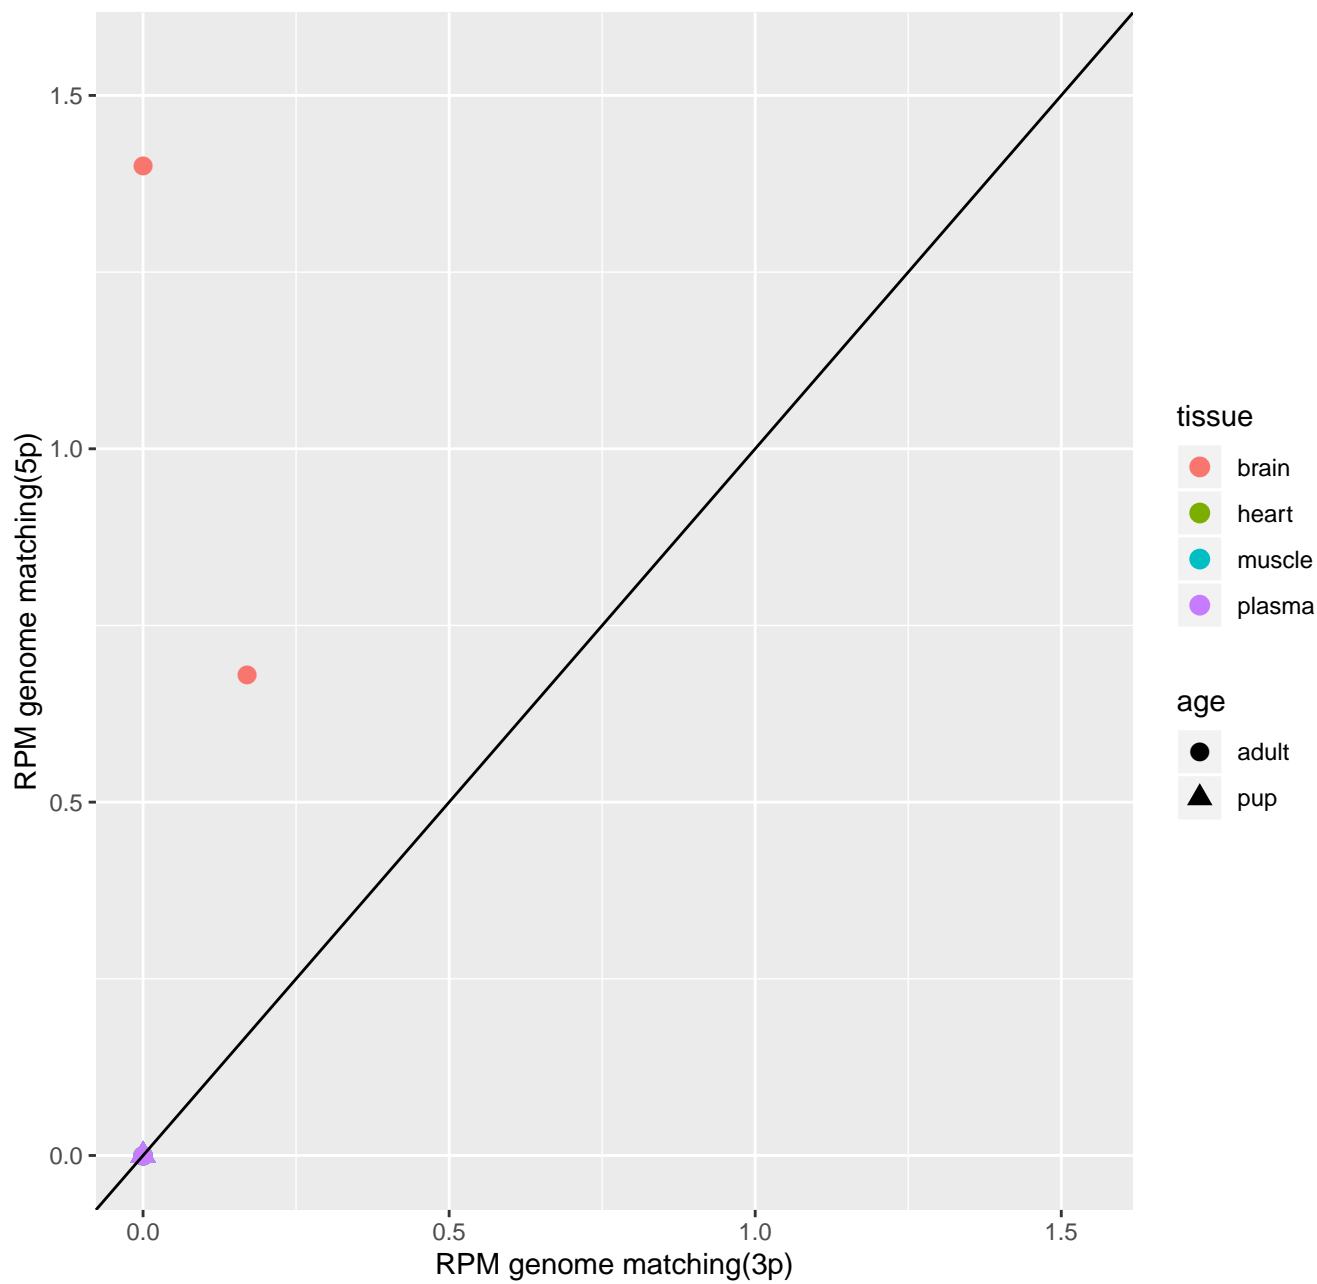

# WS\_miRDeep2\_novel\_23

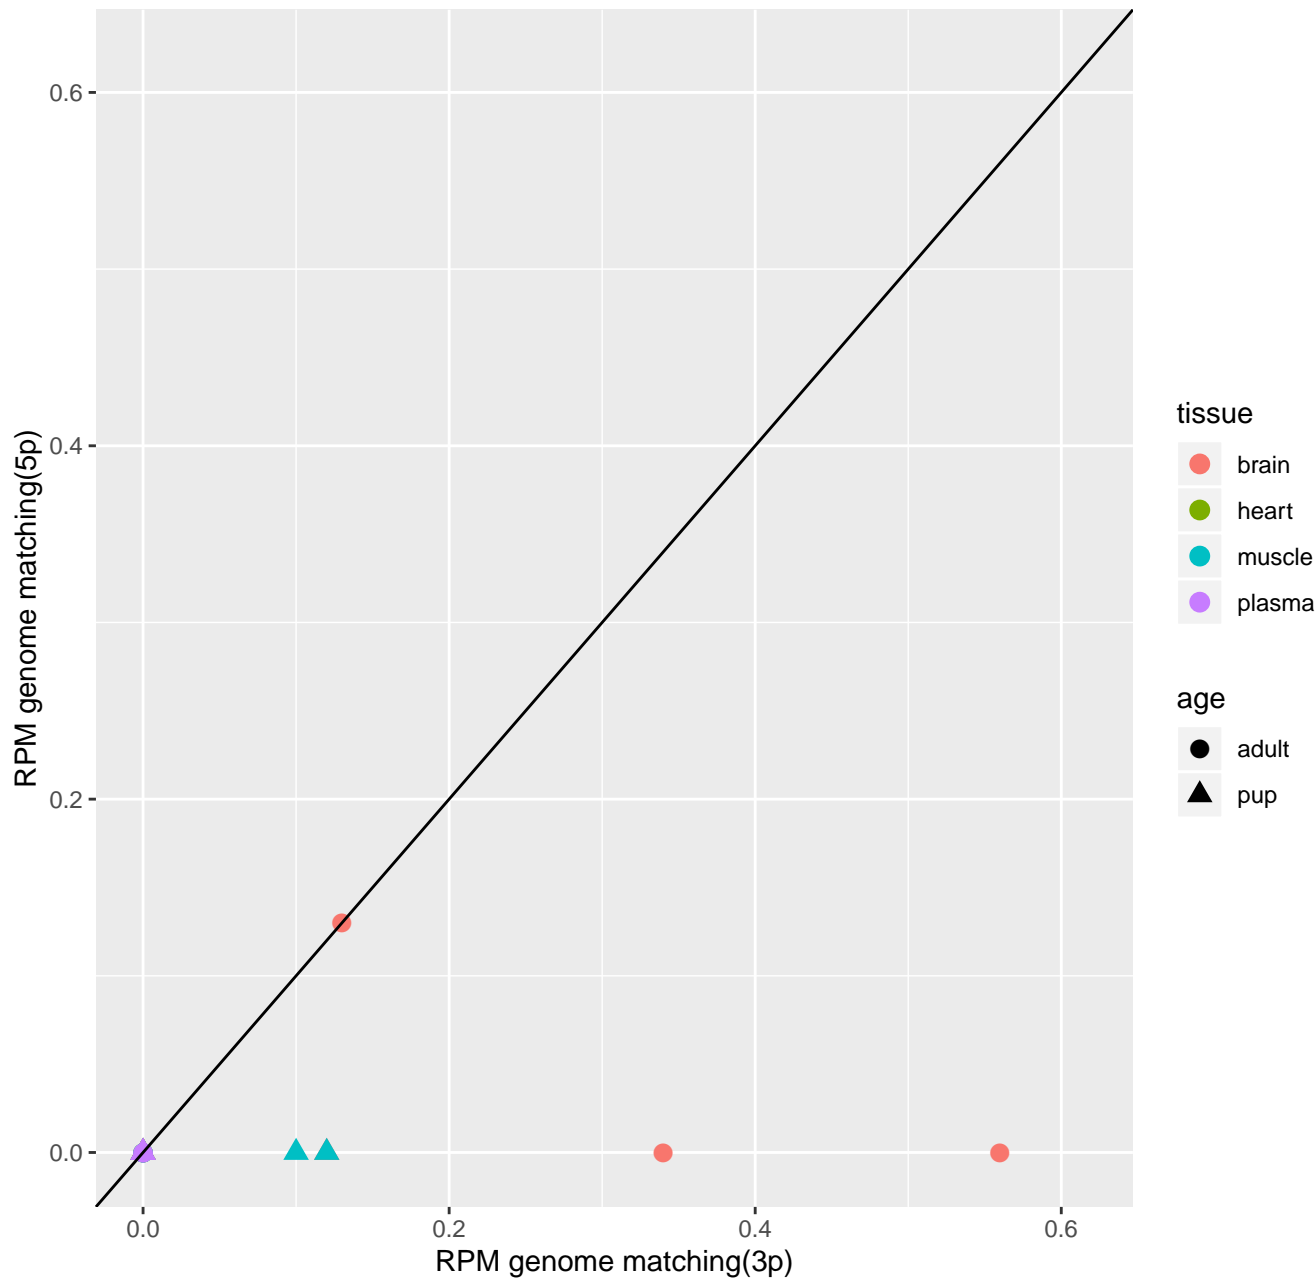



## WS\_miRDeep2\_novel\_24

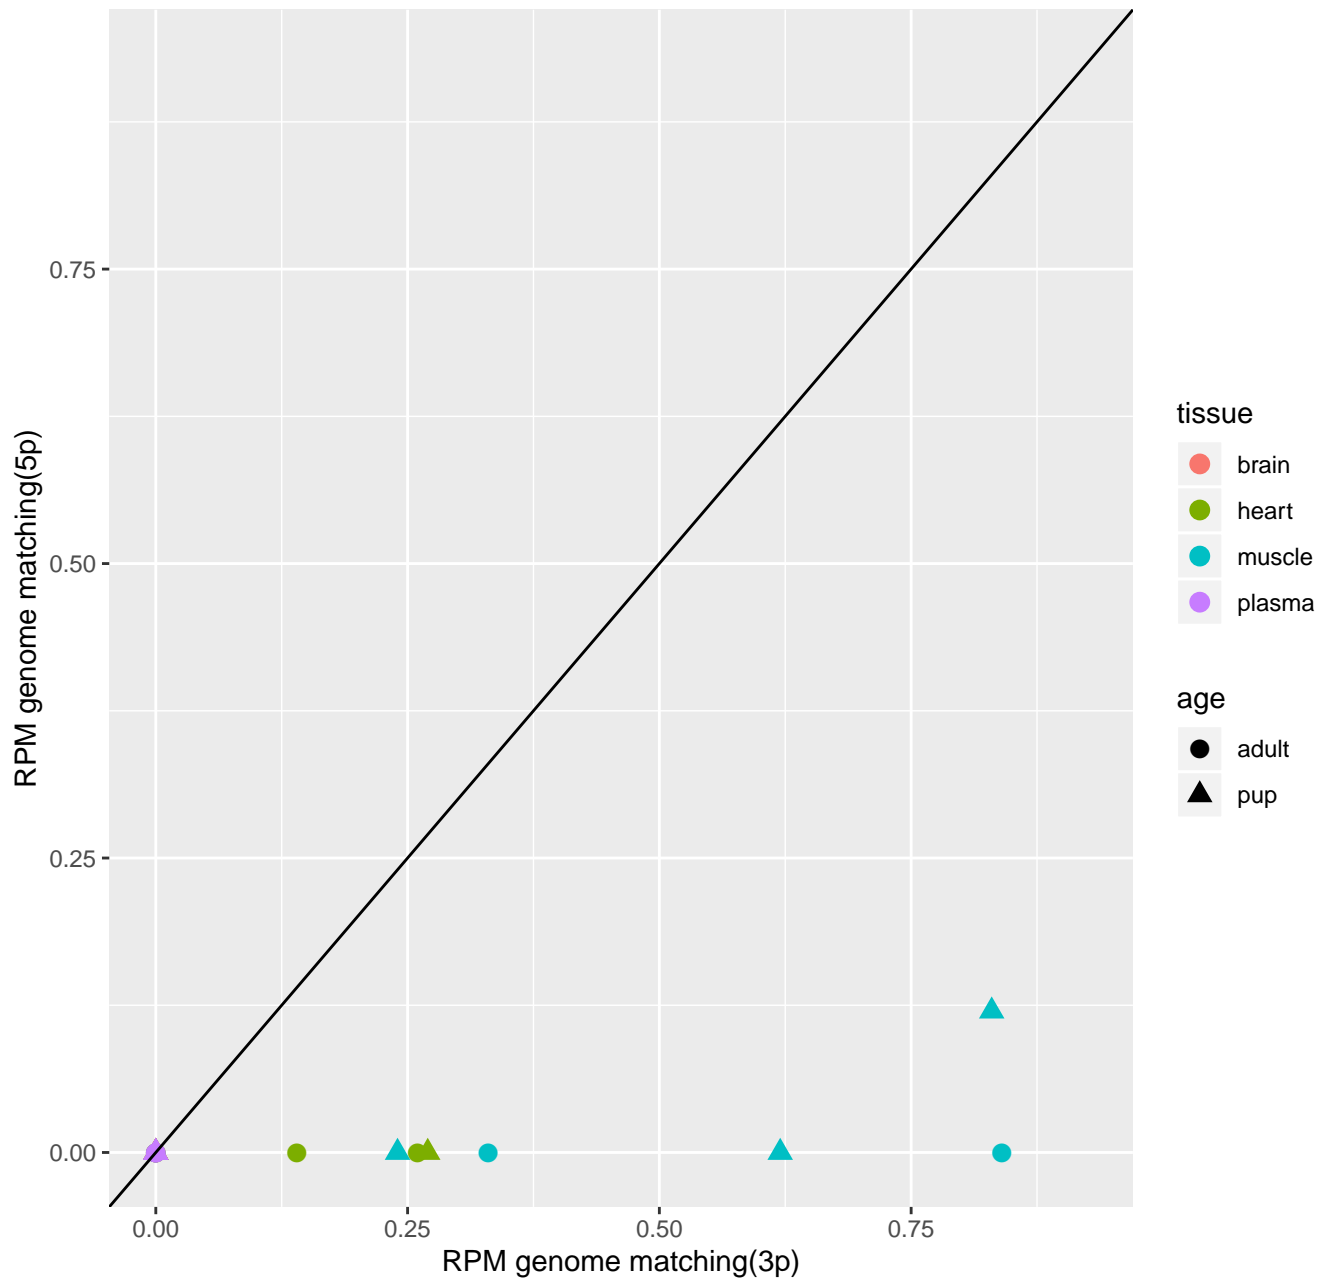

WS\_miRDeep2\_novel\_25

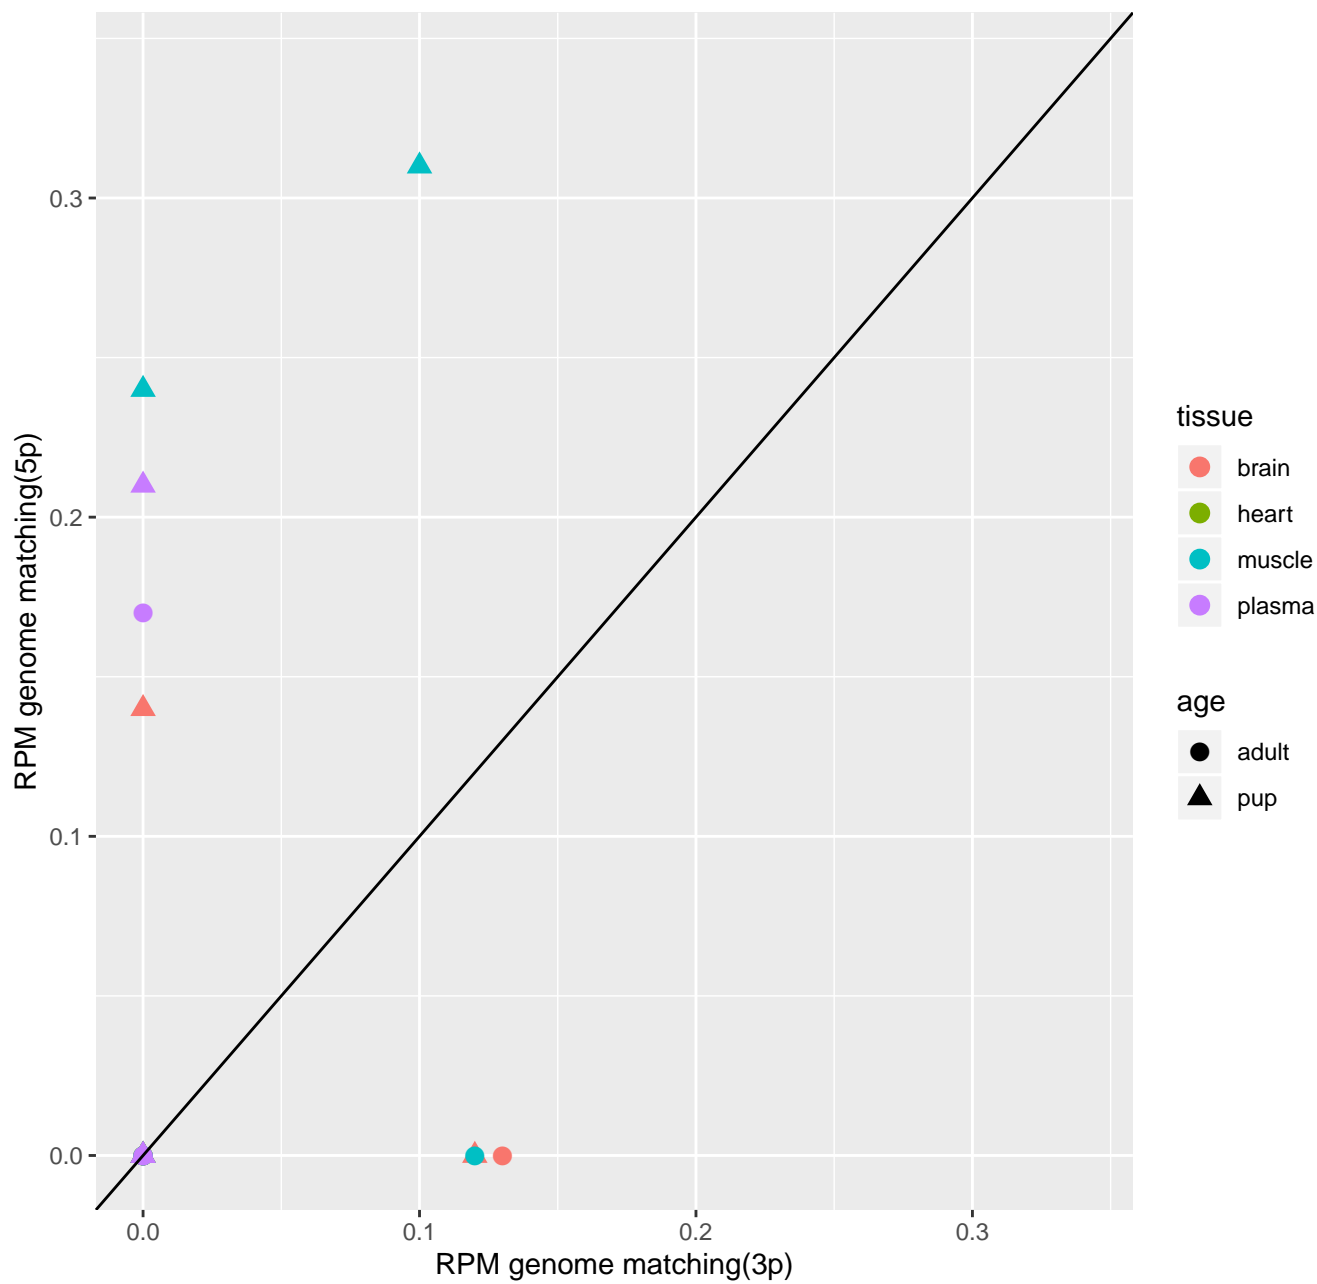

# WS\_miRDeep2\_novel\_26

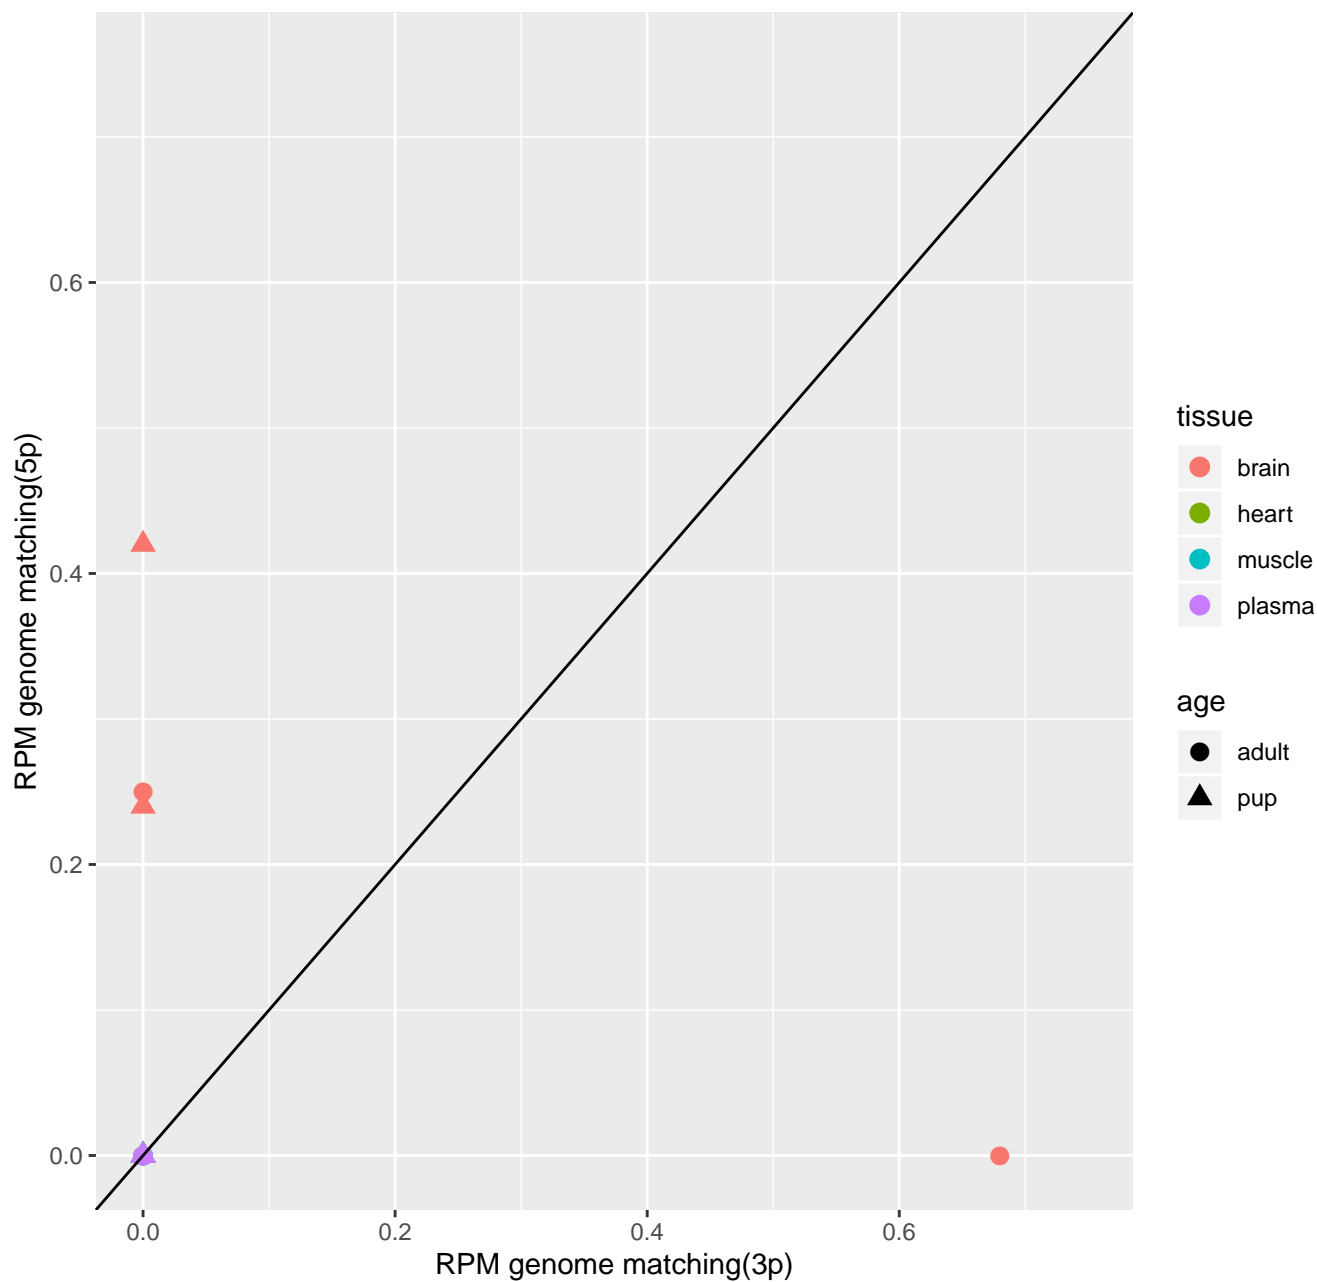

# WS\_miRDeep2\_novel\_27

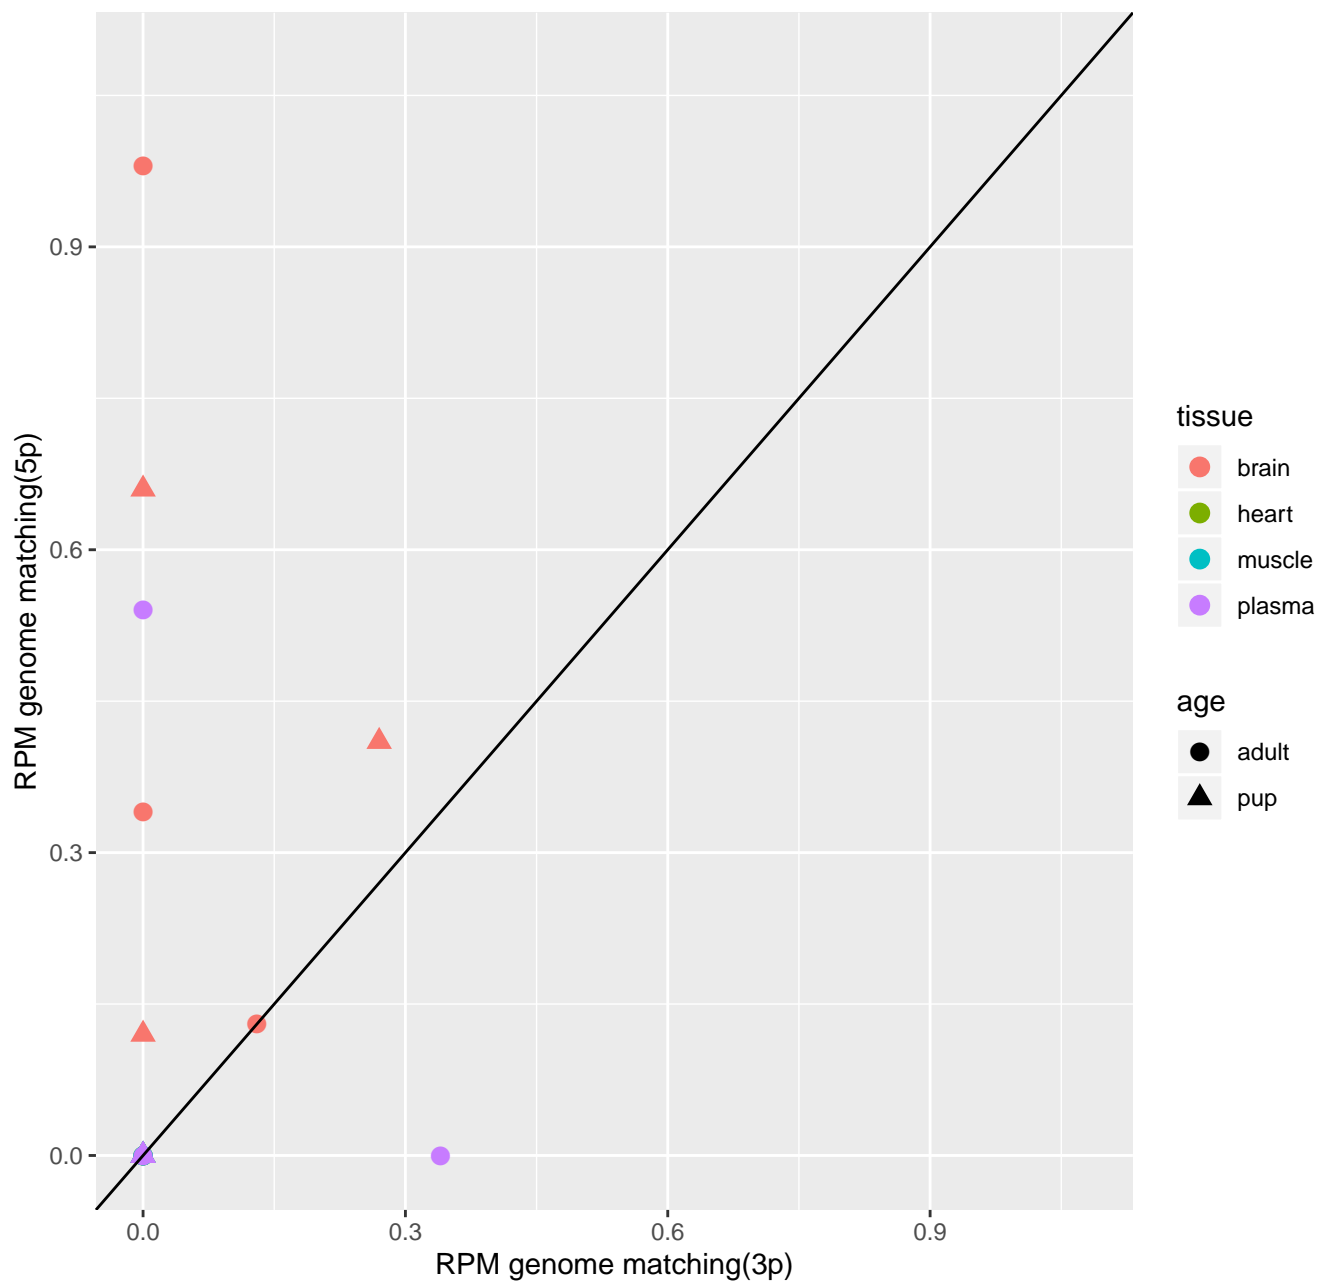

## lwe-miR-374b\_miRDeep2\_loc1

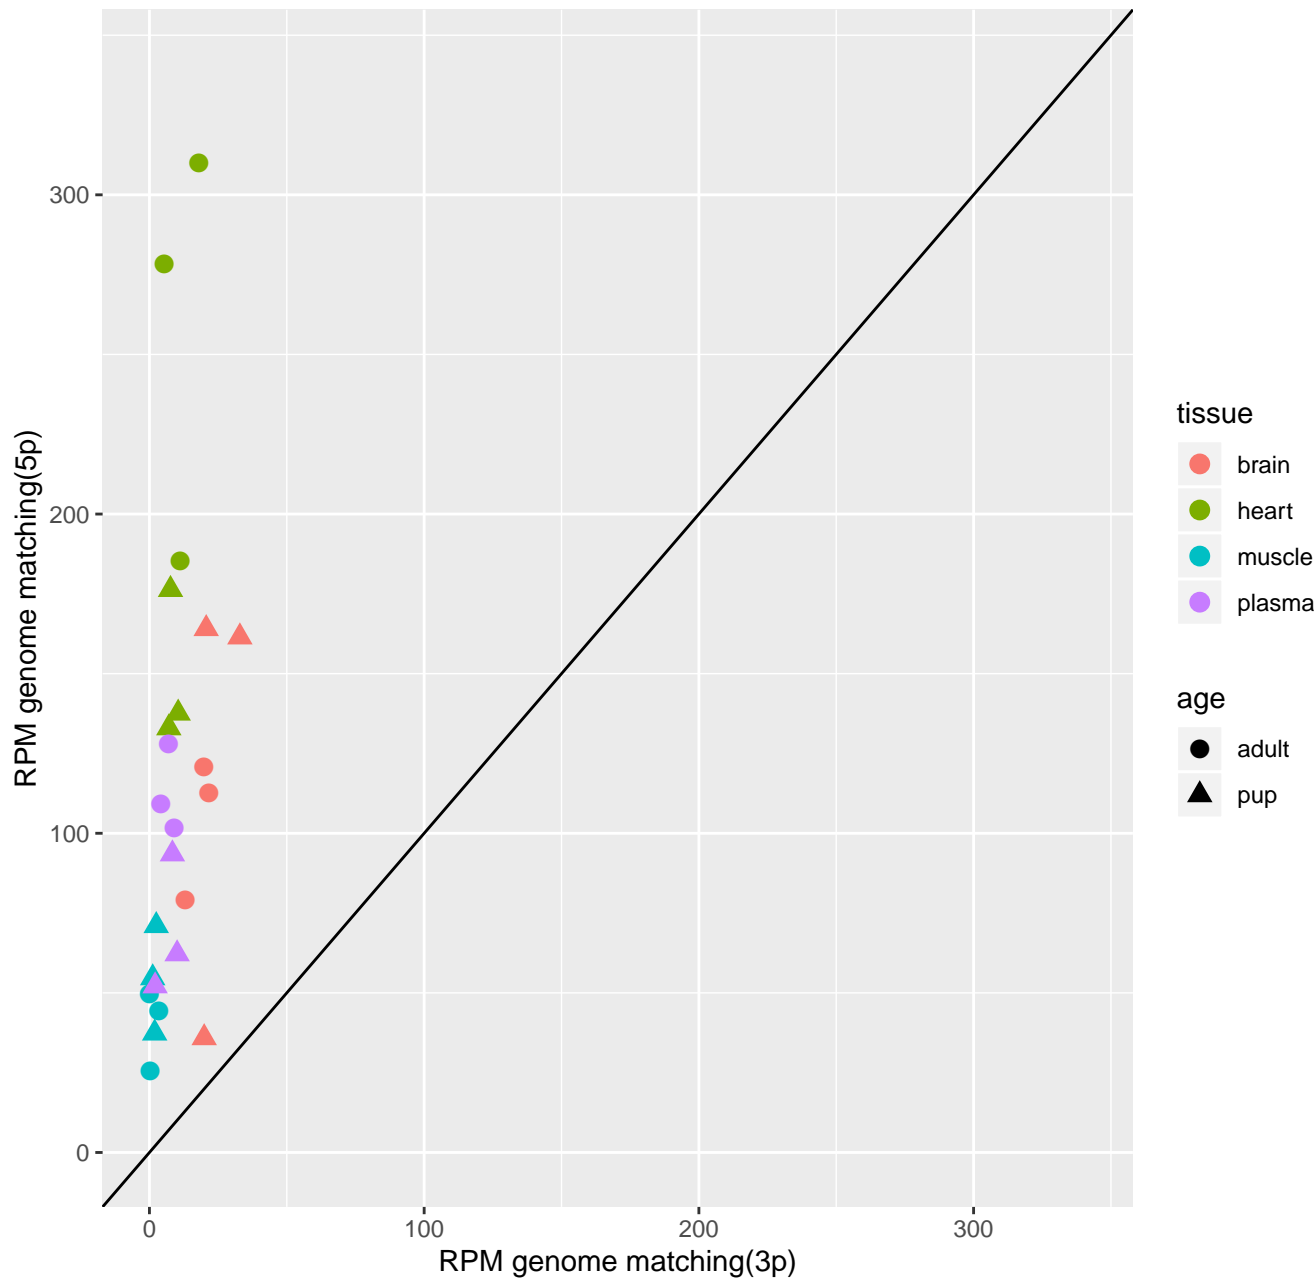

# WS\_miRDeep2\_novel\_28

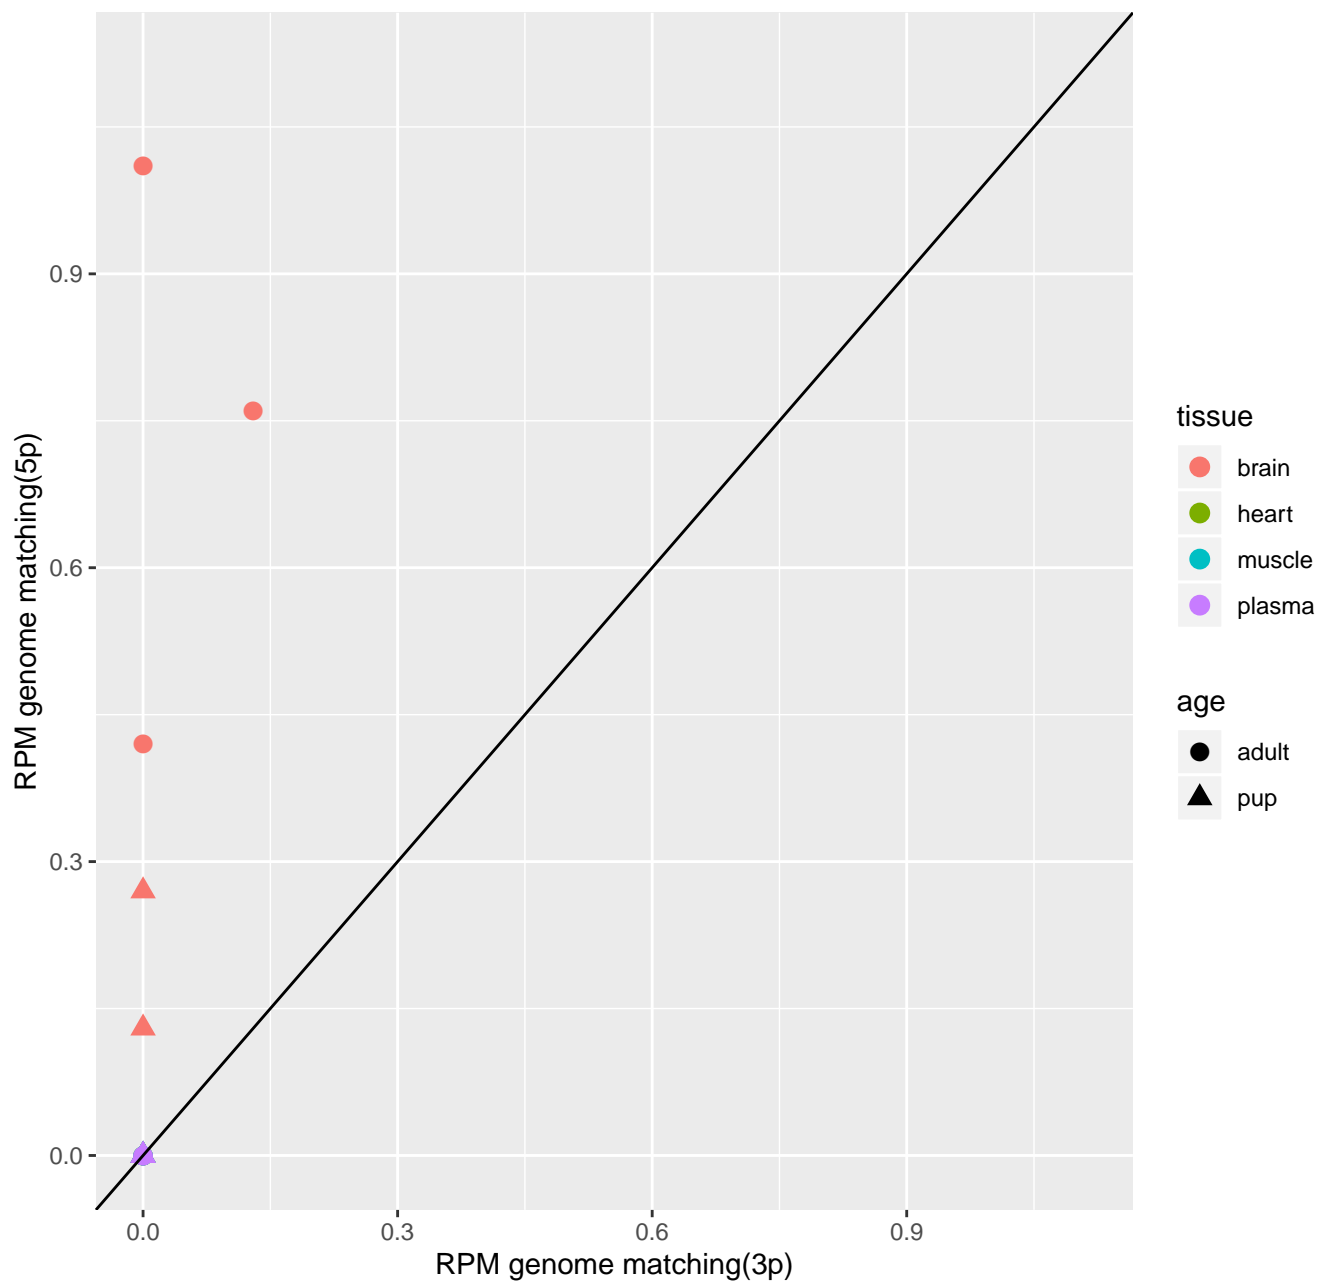

# WS\_miRDeep2\_novel\_29

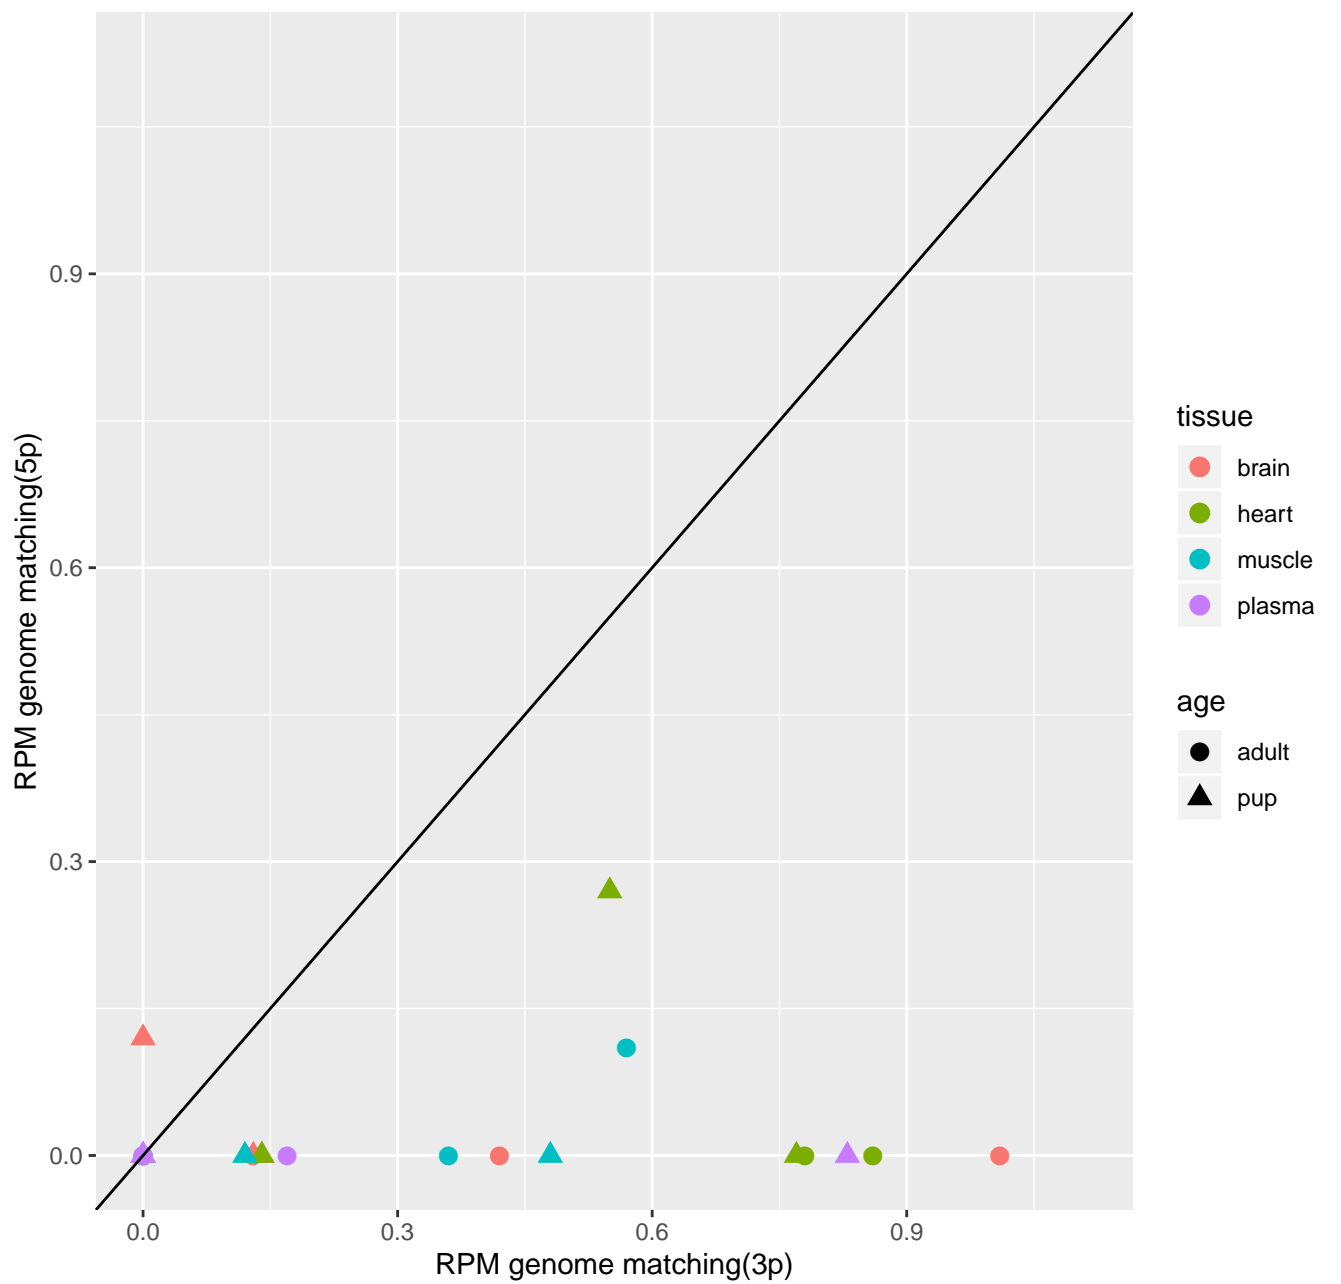

# WS\_miRDeep2\_novel\_30

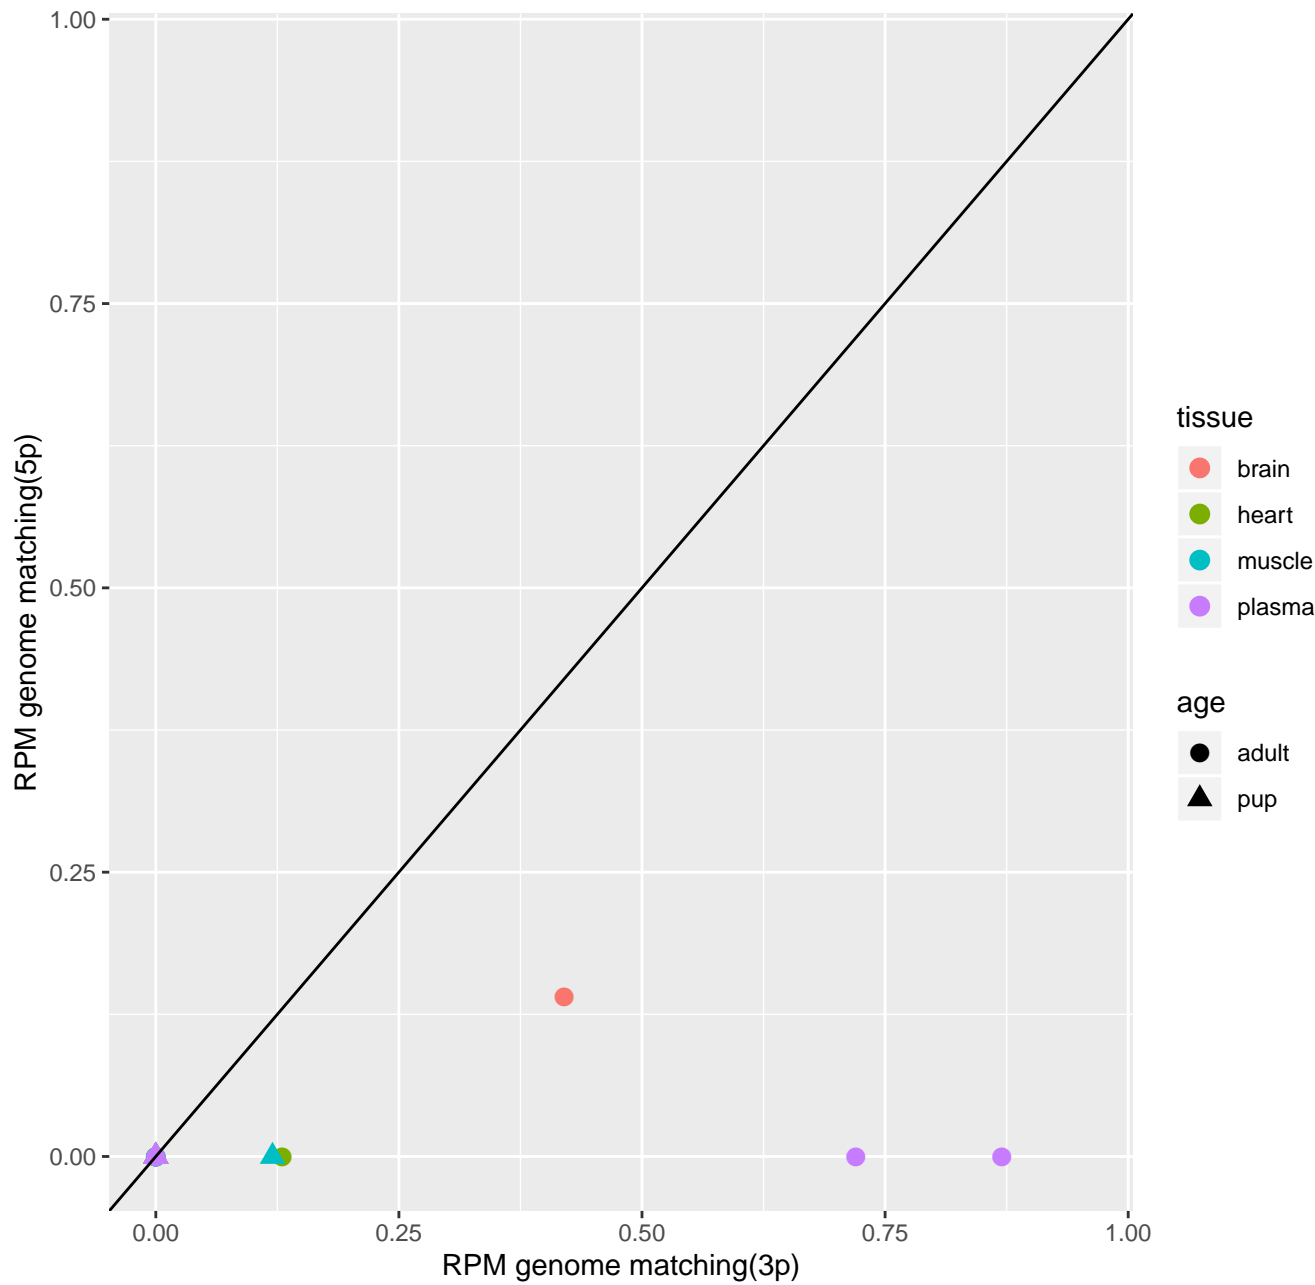



## WS\_miRDeep2\_novel\_31

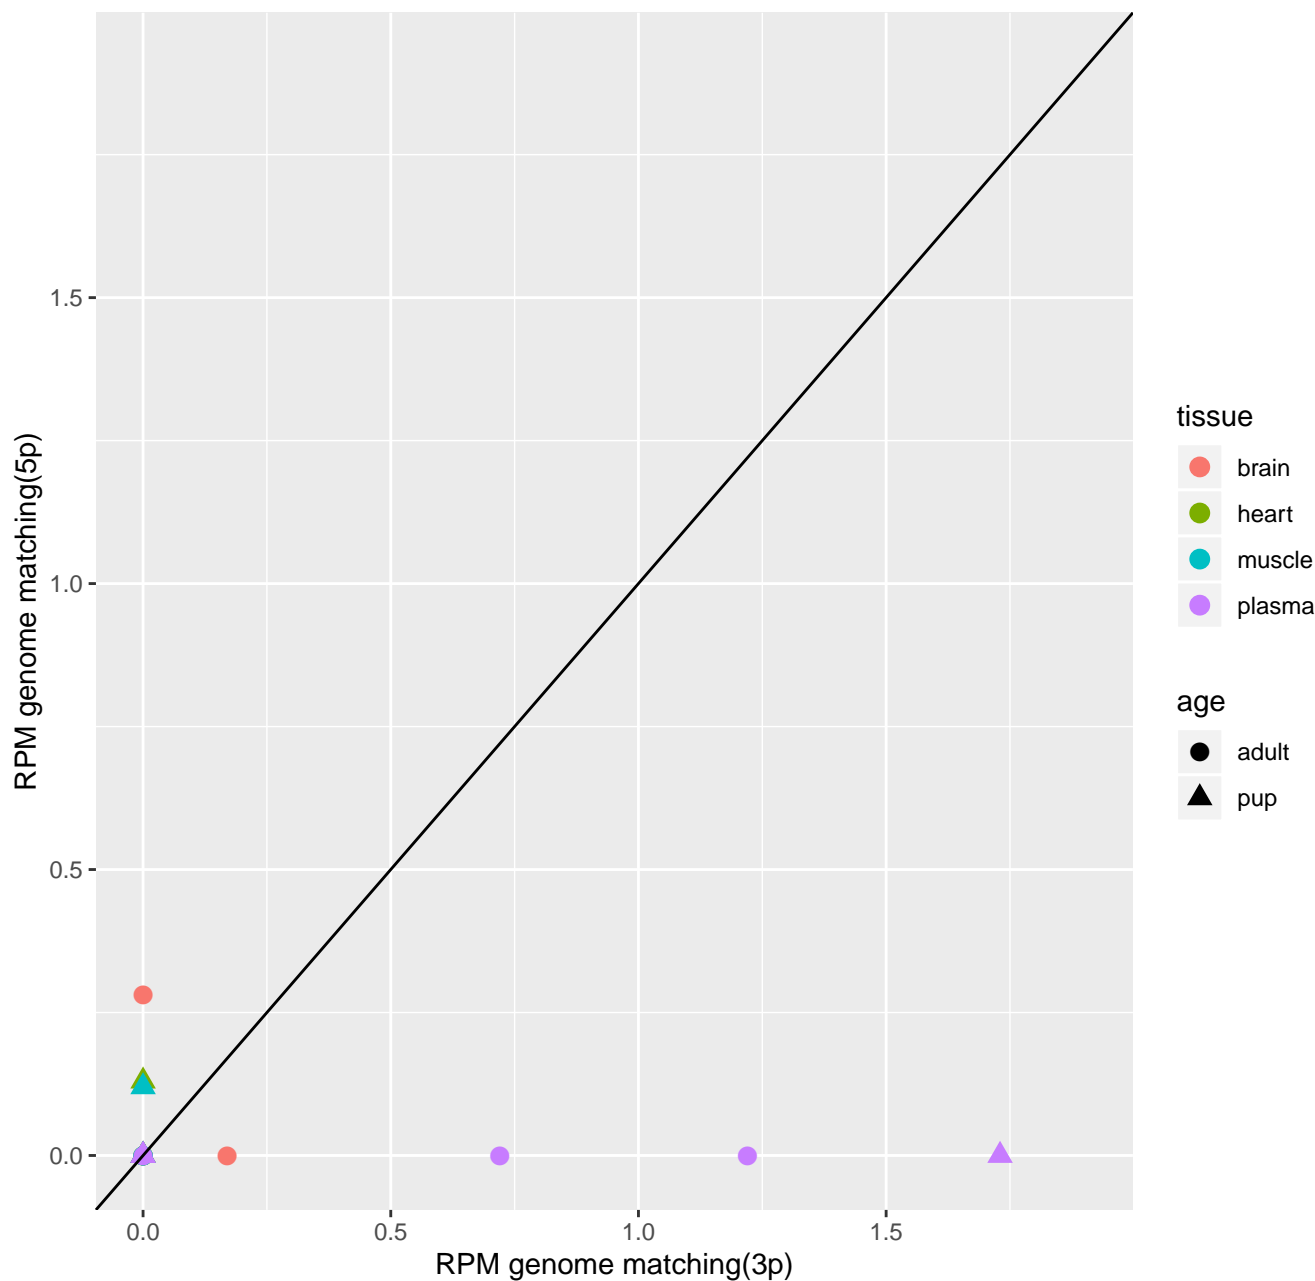

## WS\_miRDeep2\_novel\_32

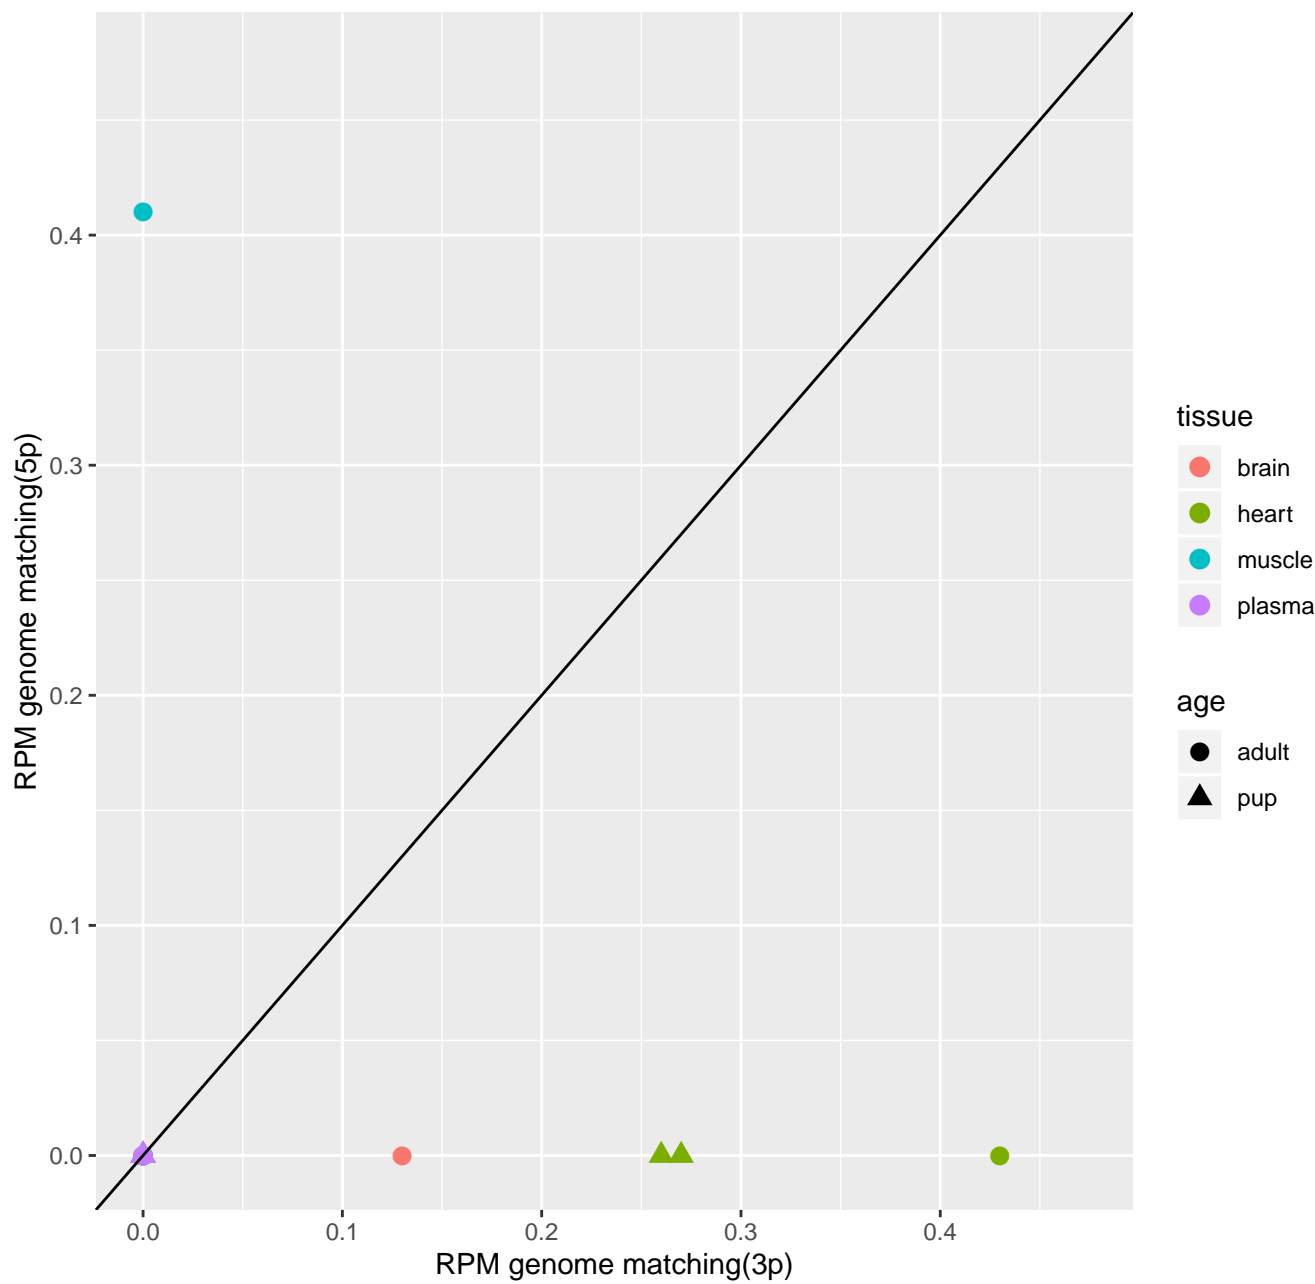

# WS\_miRDeep2\_novel\_33

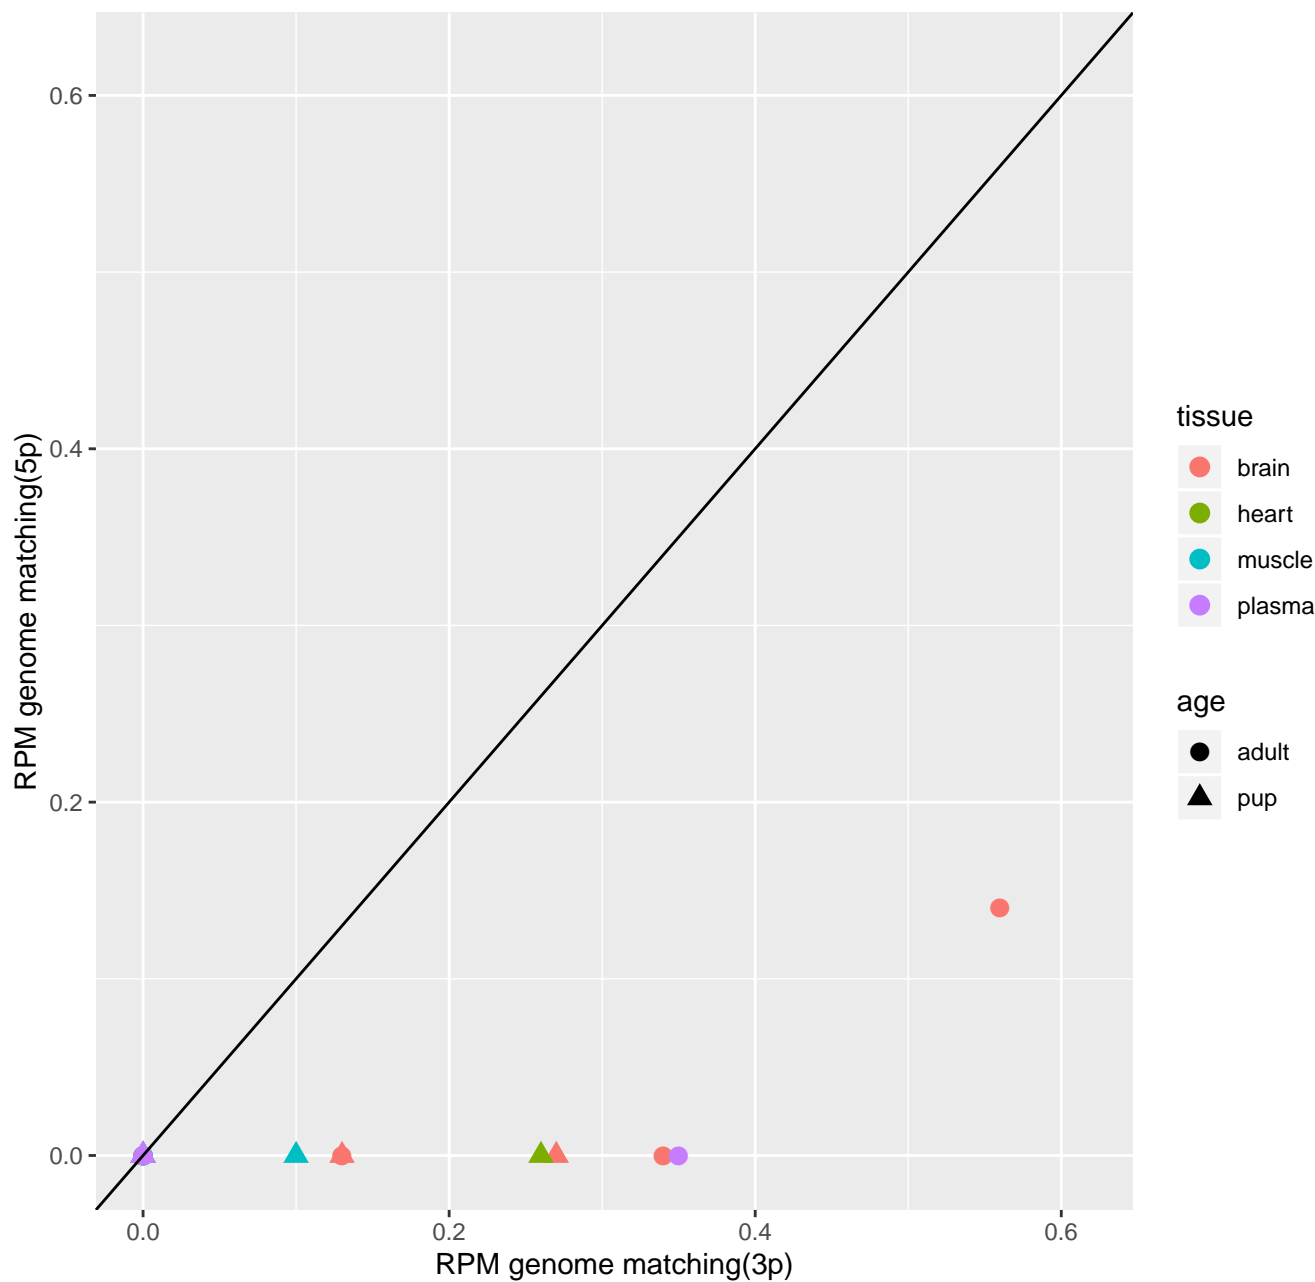

## WS\_miRDeep2\_novel\_34

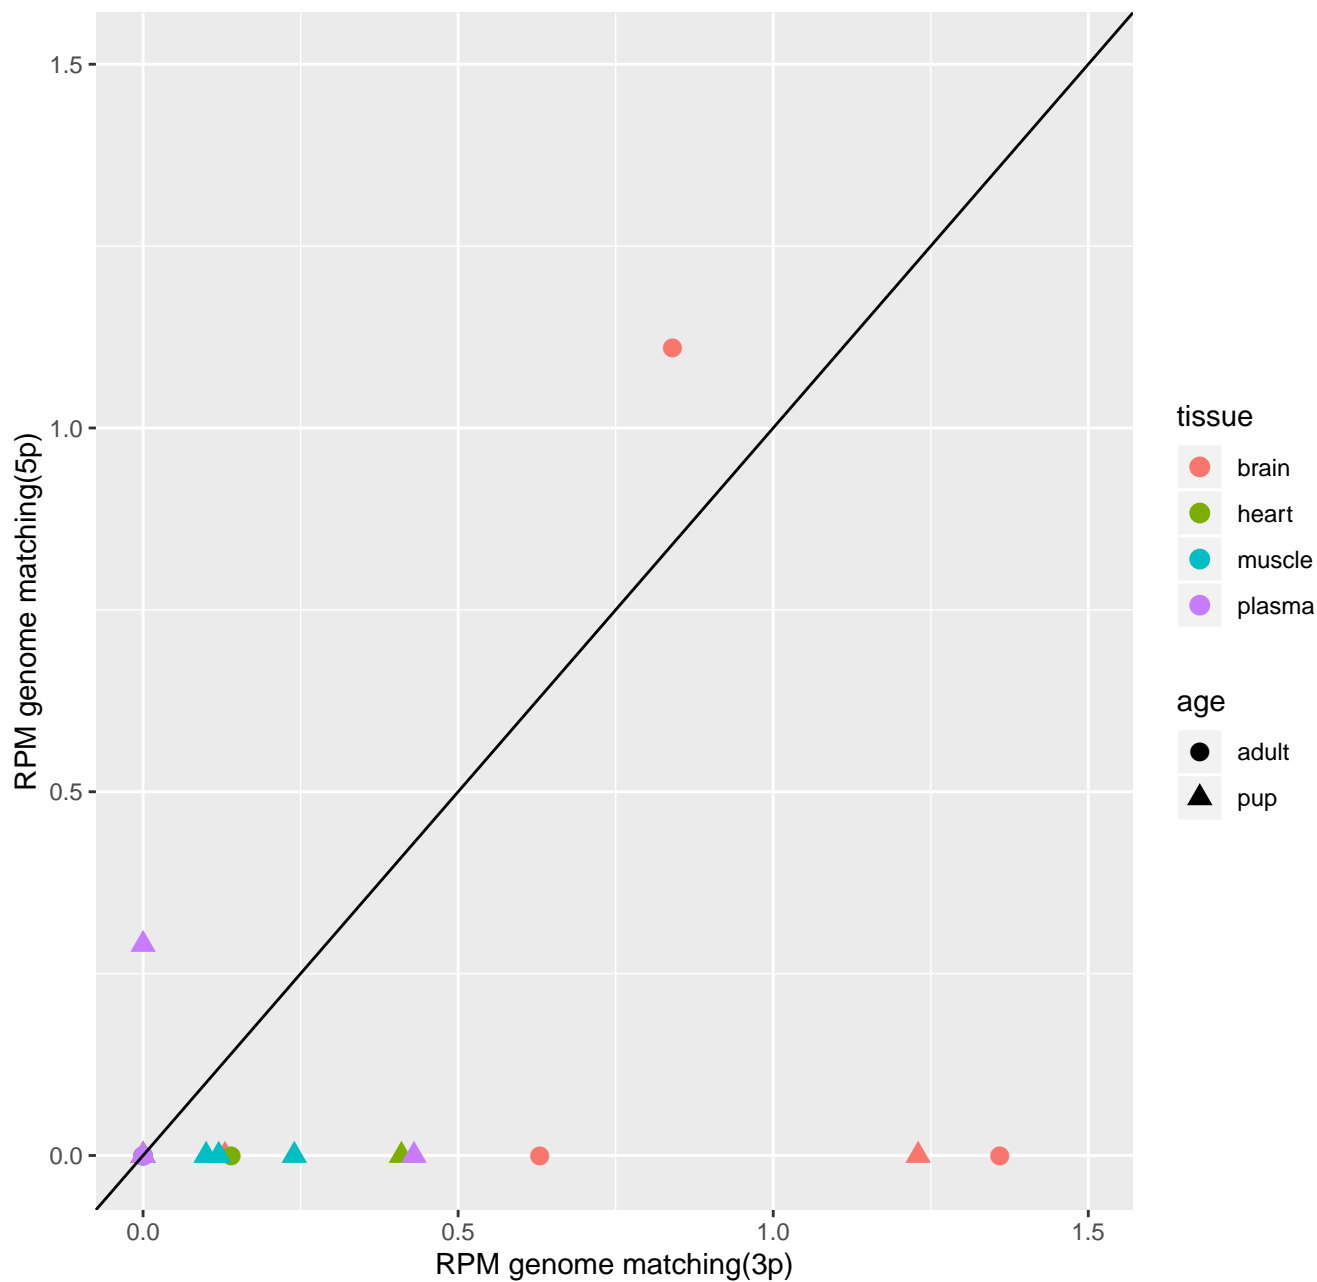

WS\_miRDeep2\_novel\_35

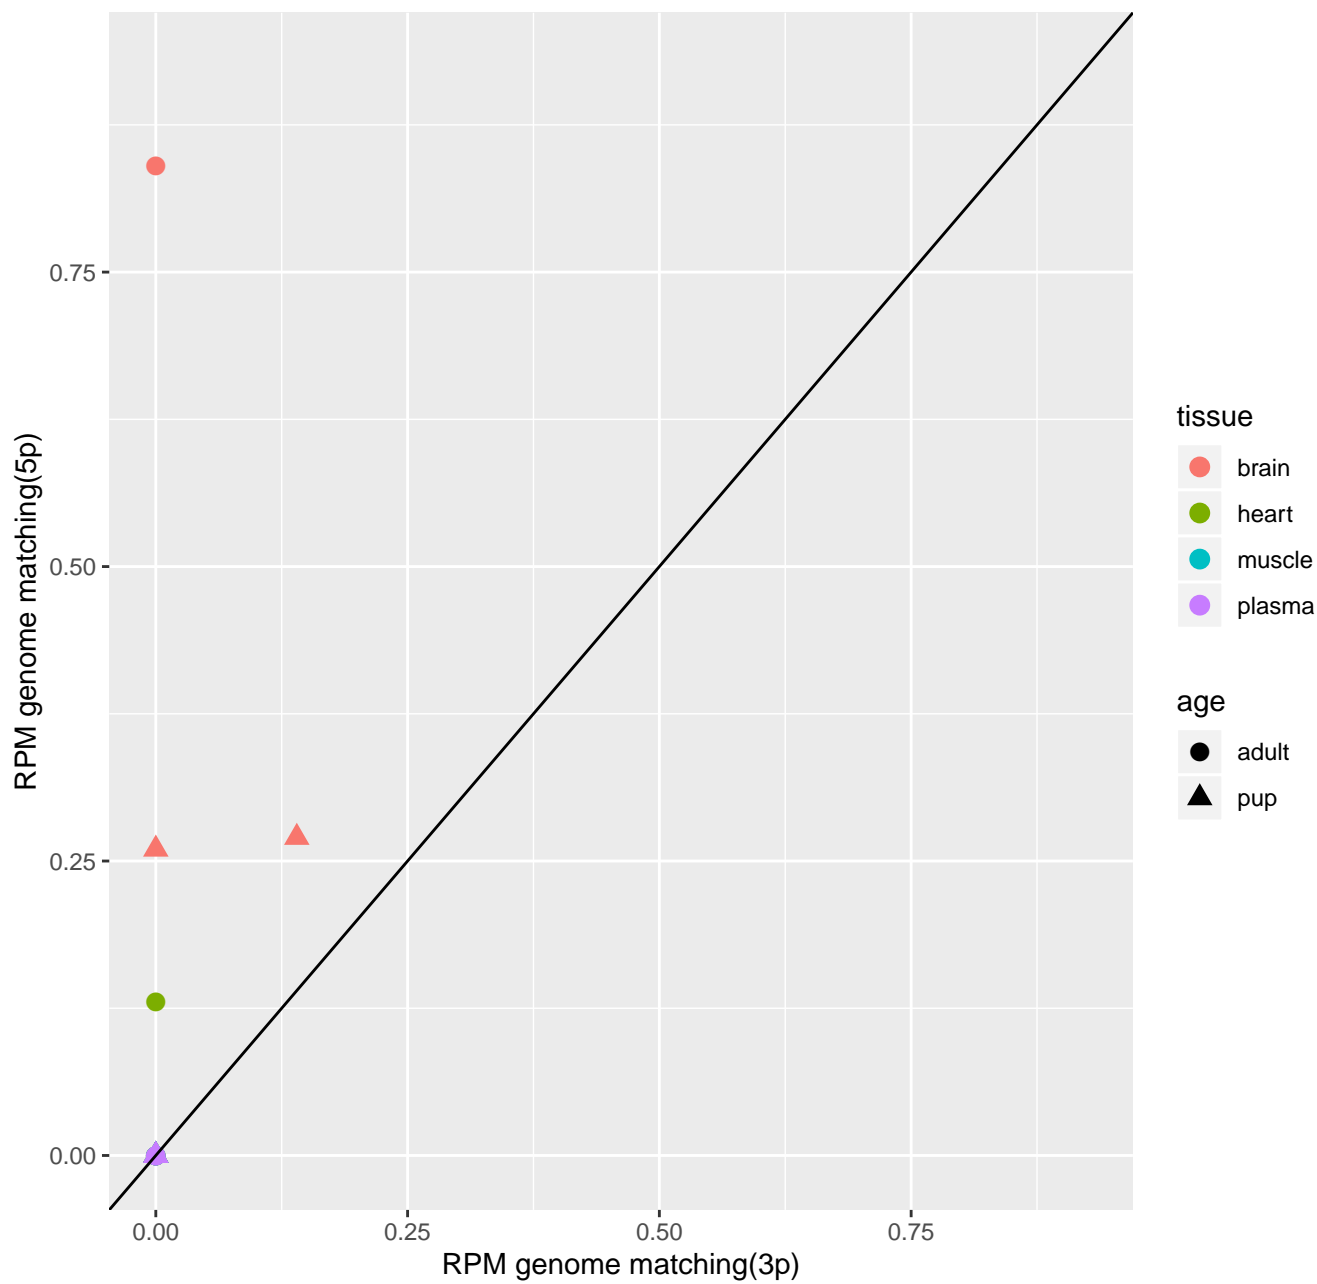

## WS\_miRDeep2\_novel\_36

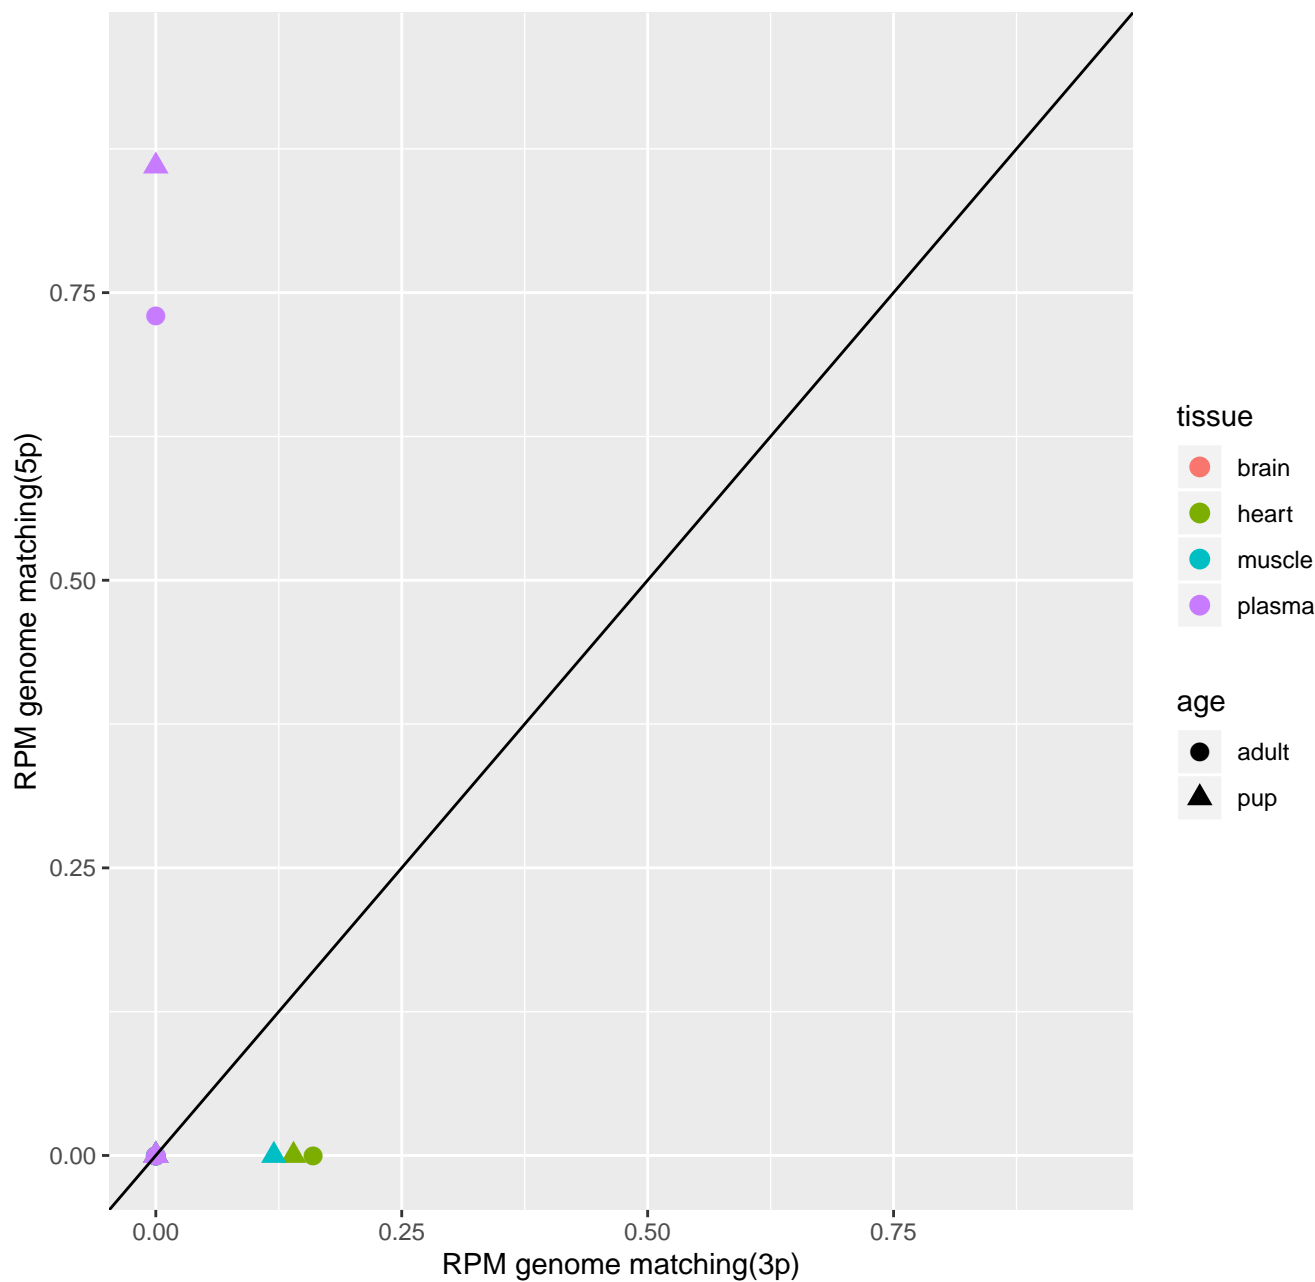

# WS\_miRDeep2\_novel\_37

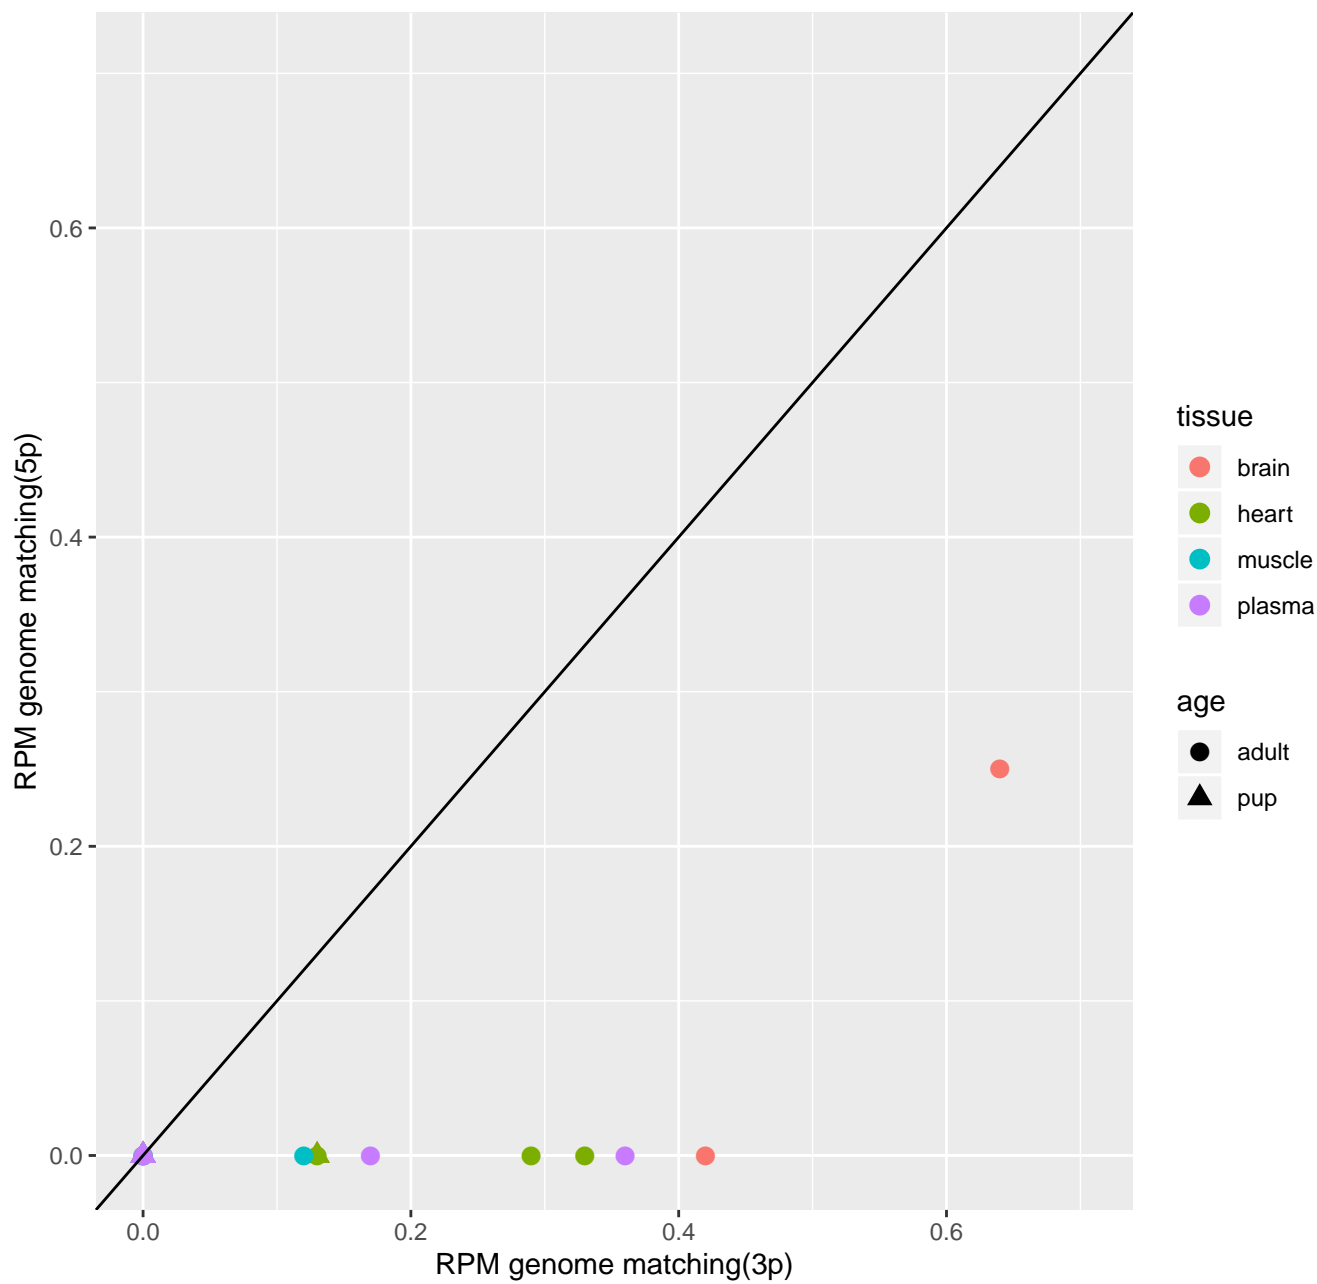

WS\_miRDeep2\_novel\_38

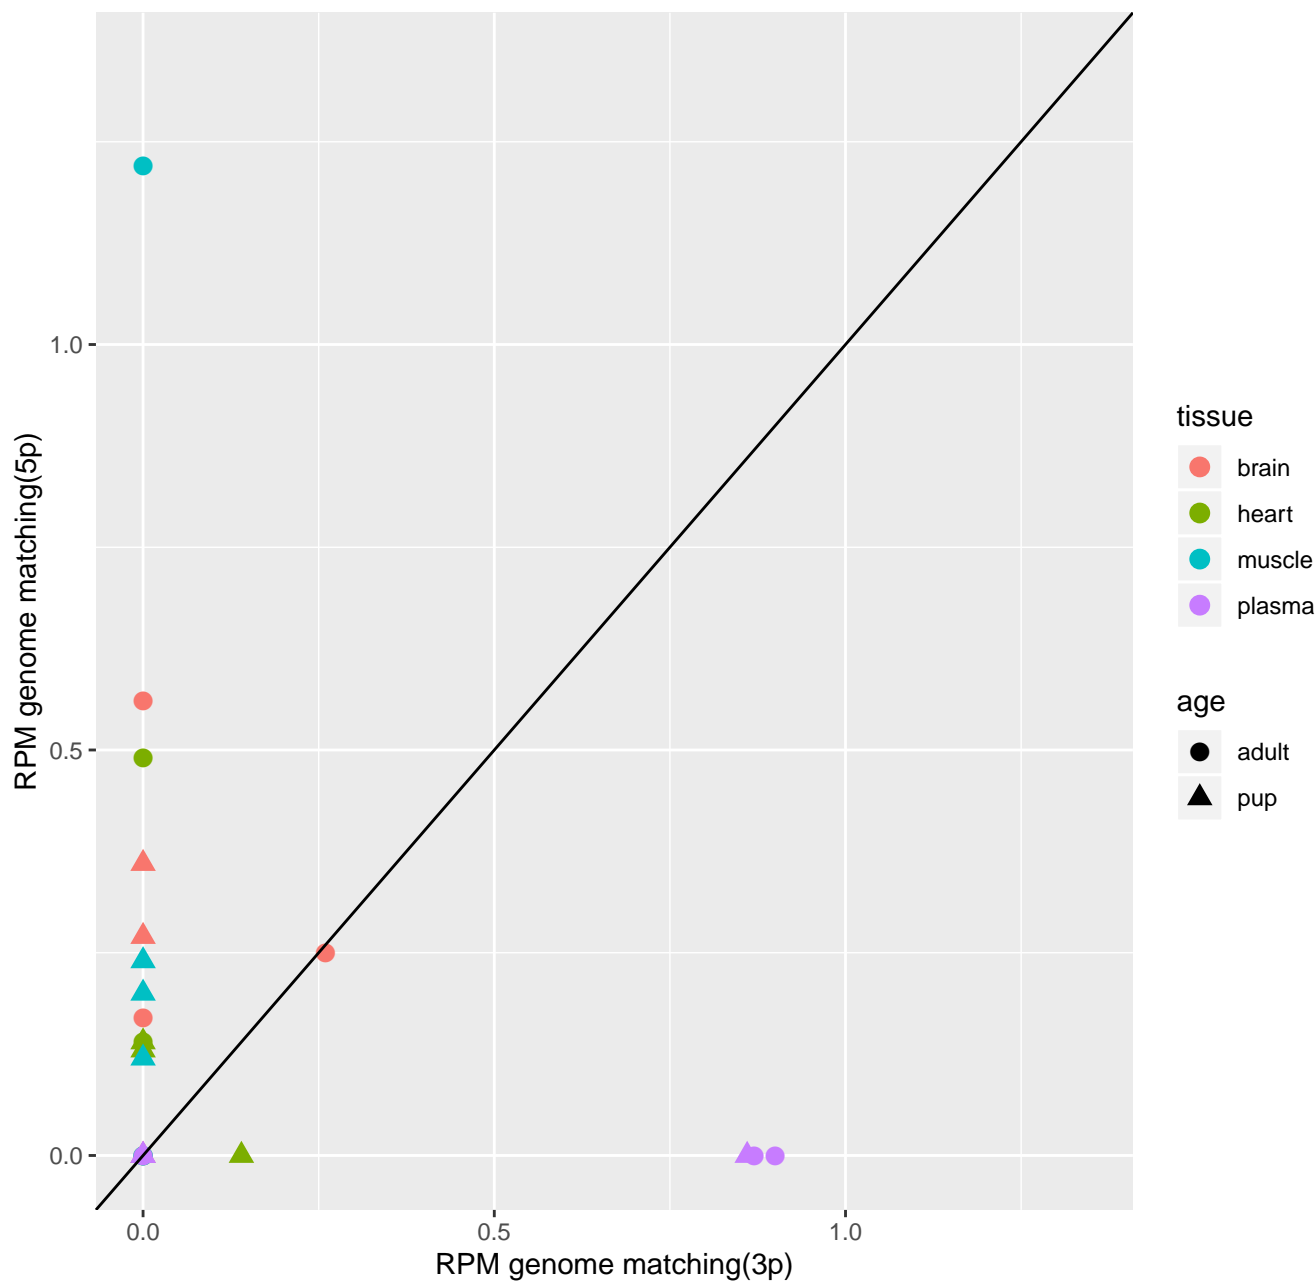



WS\_miRDeep2\_novel\_39

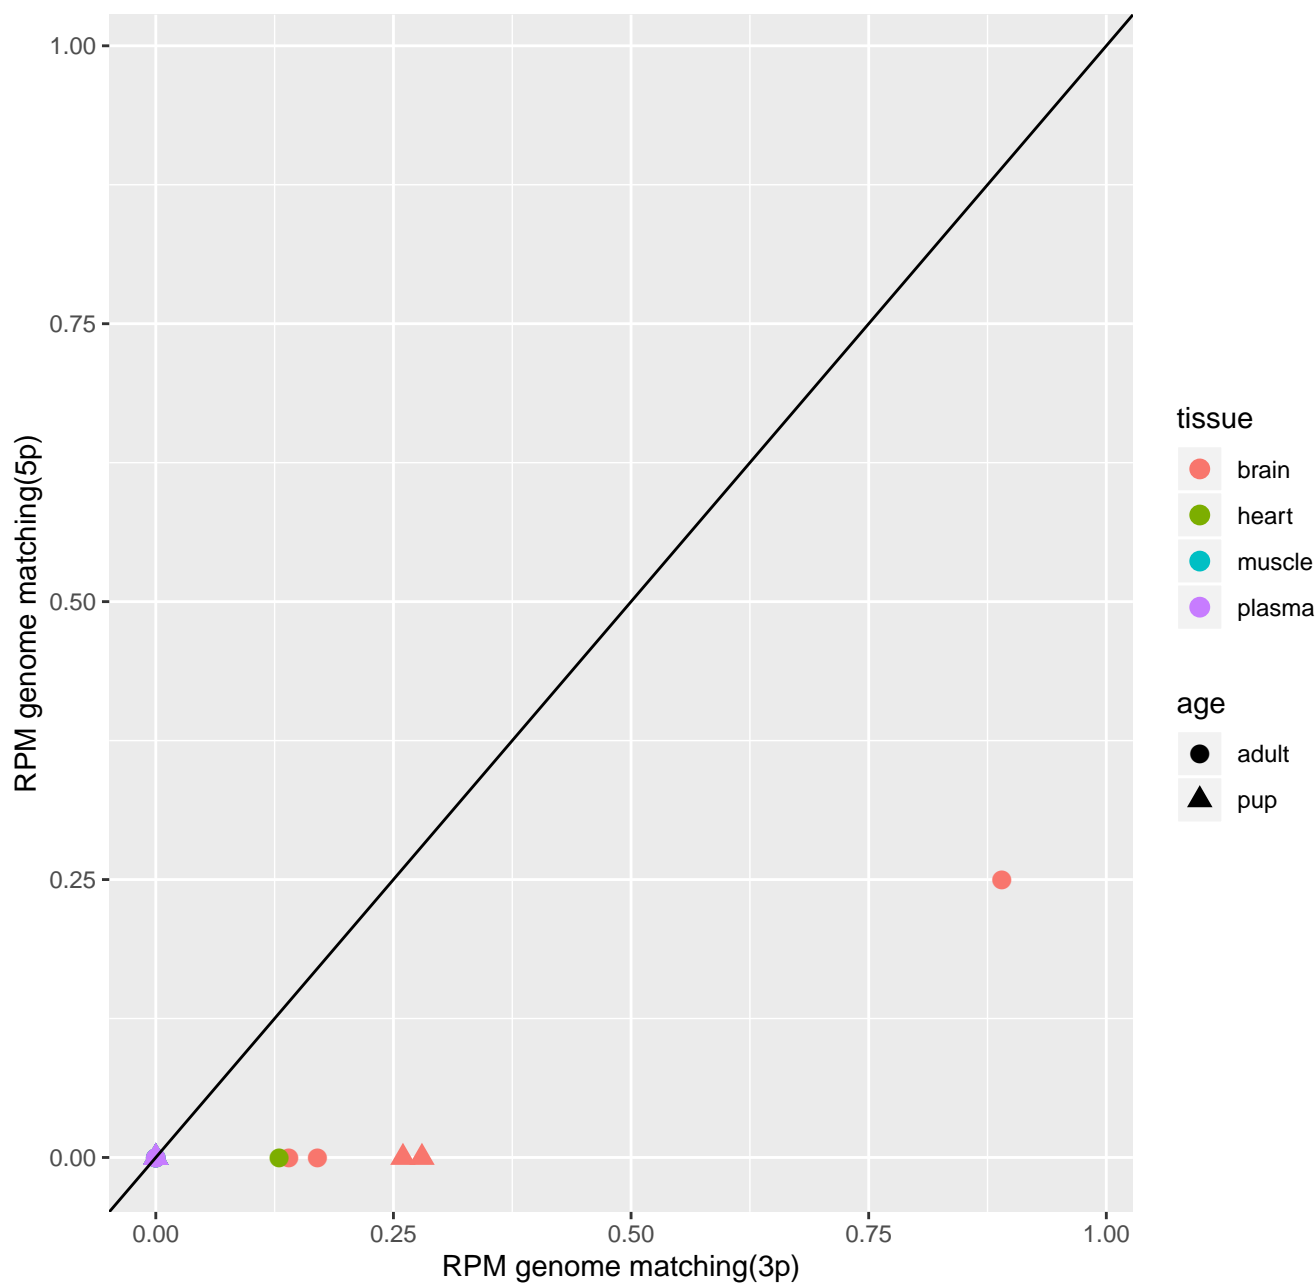

# lwe-miR-7143\_loc1

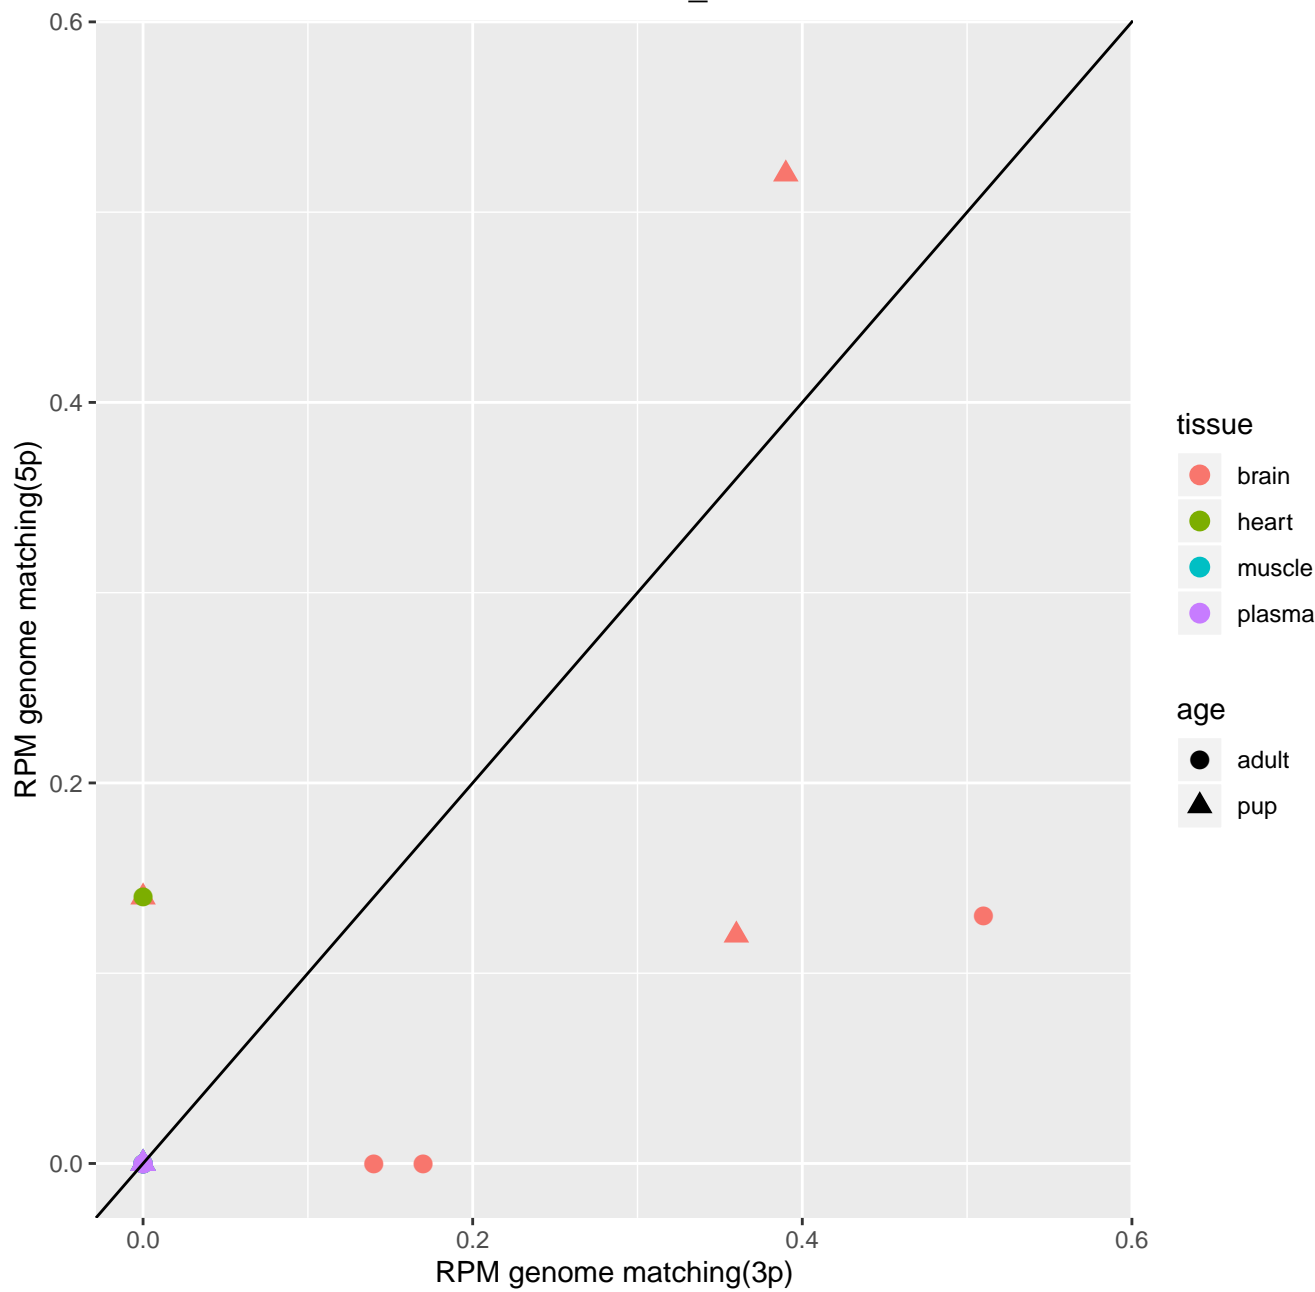

WS\_miRDeep2\_novel\_41

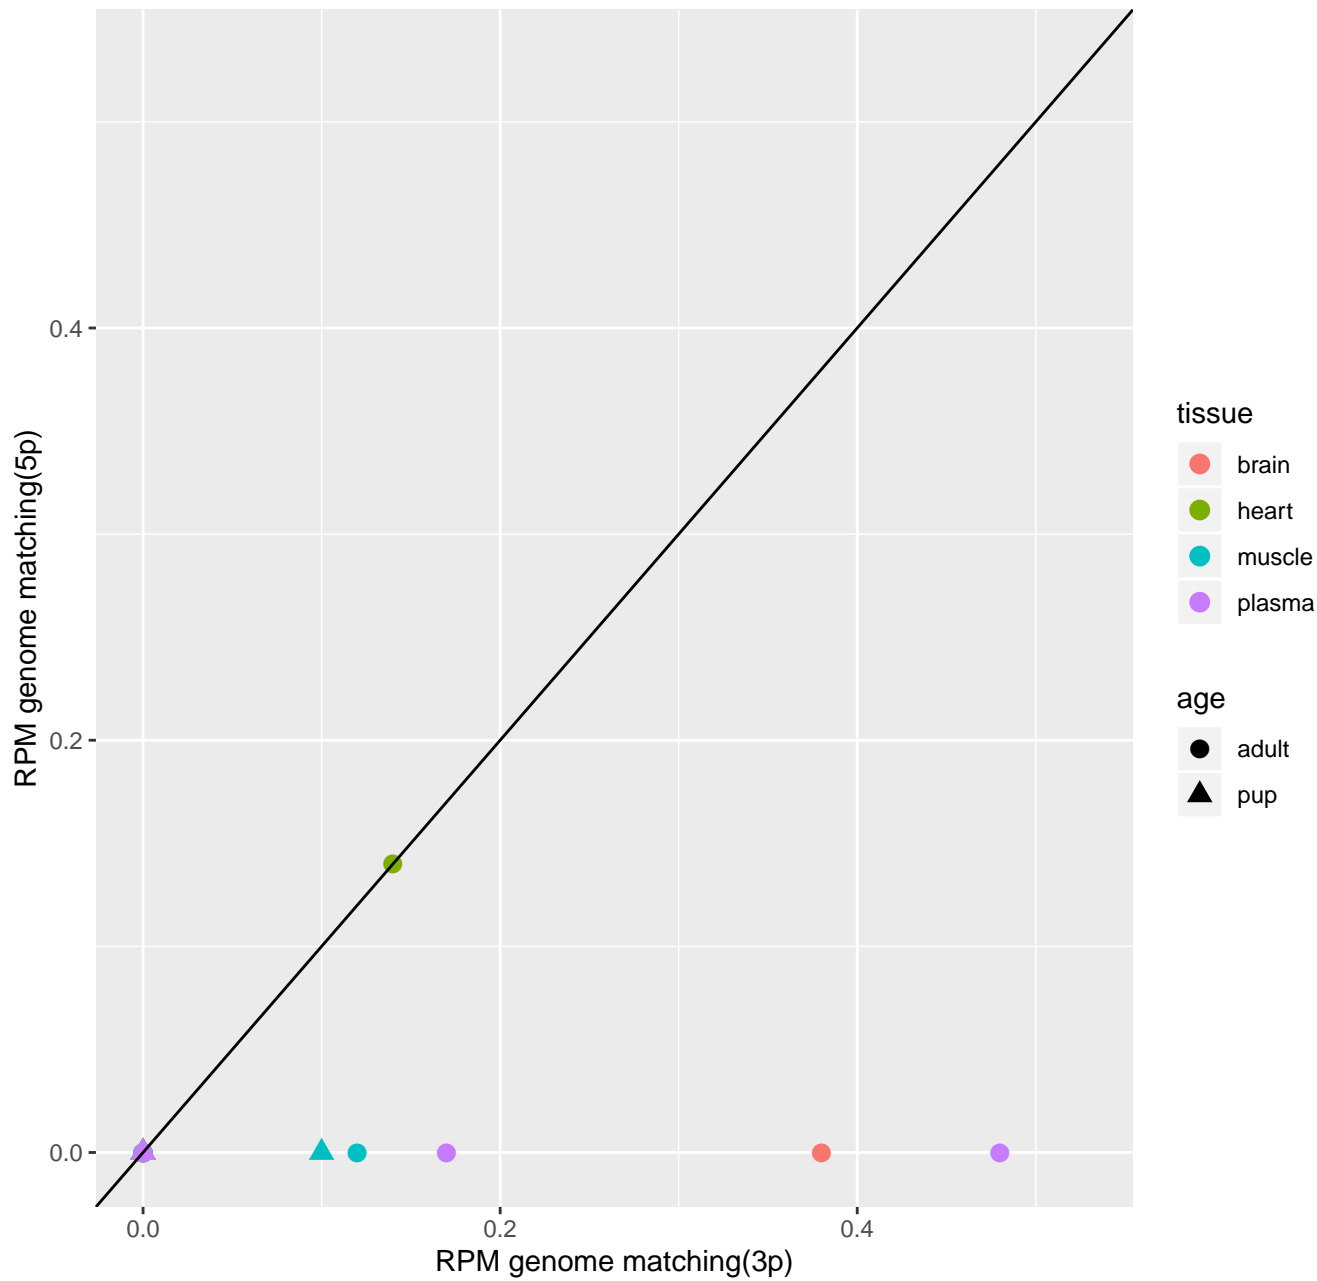

## WS\_miRDeep2\_novel\_42

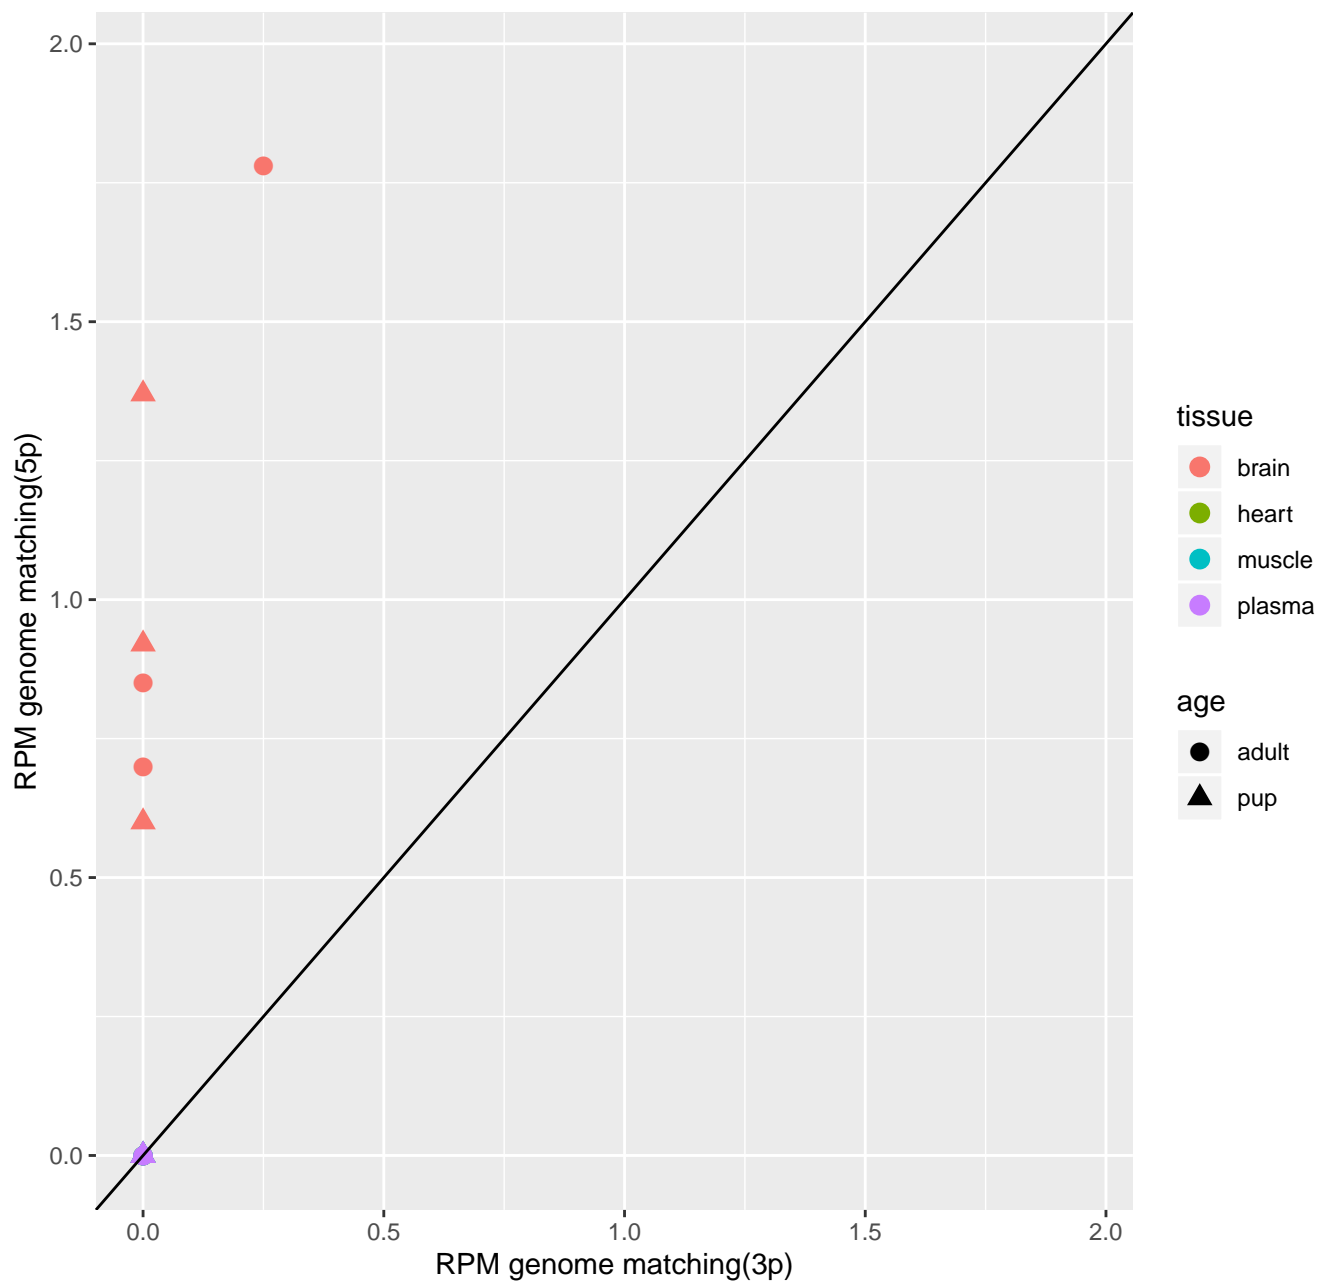

# WS\_miRDeep2\_novel\_43

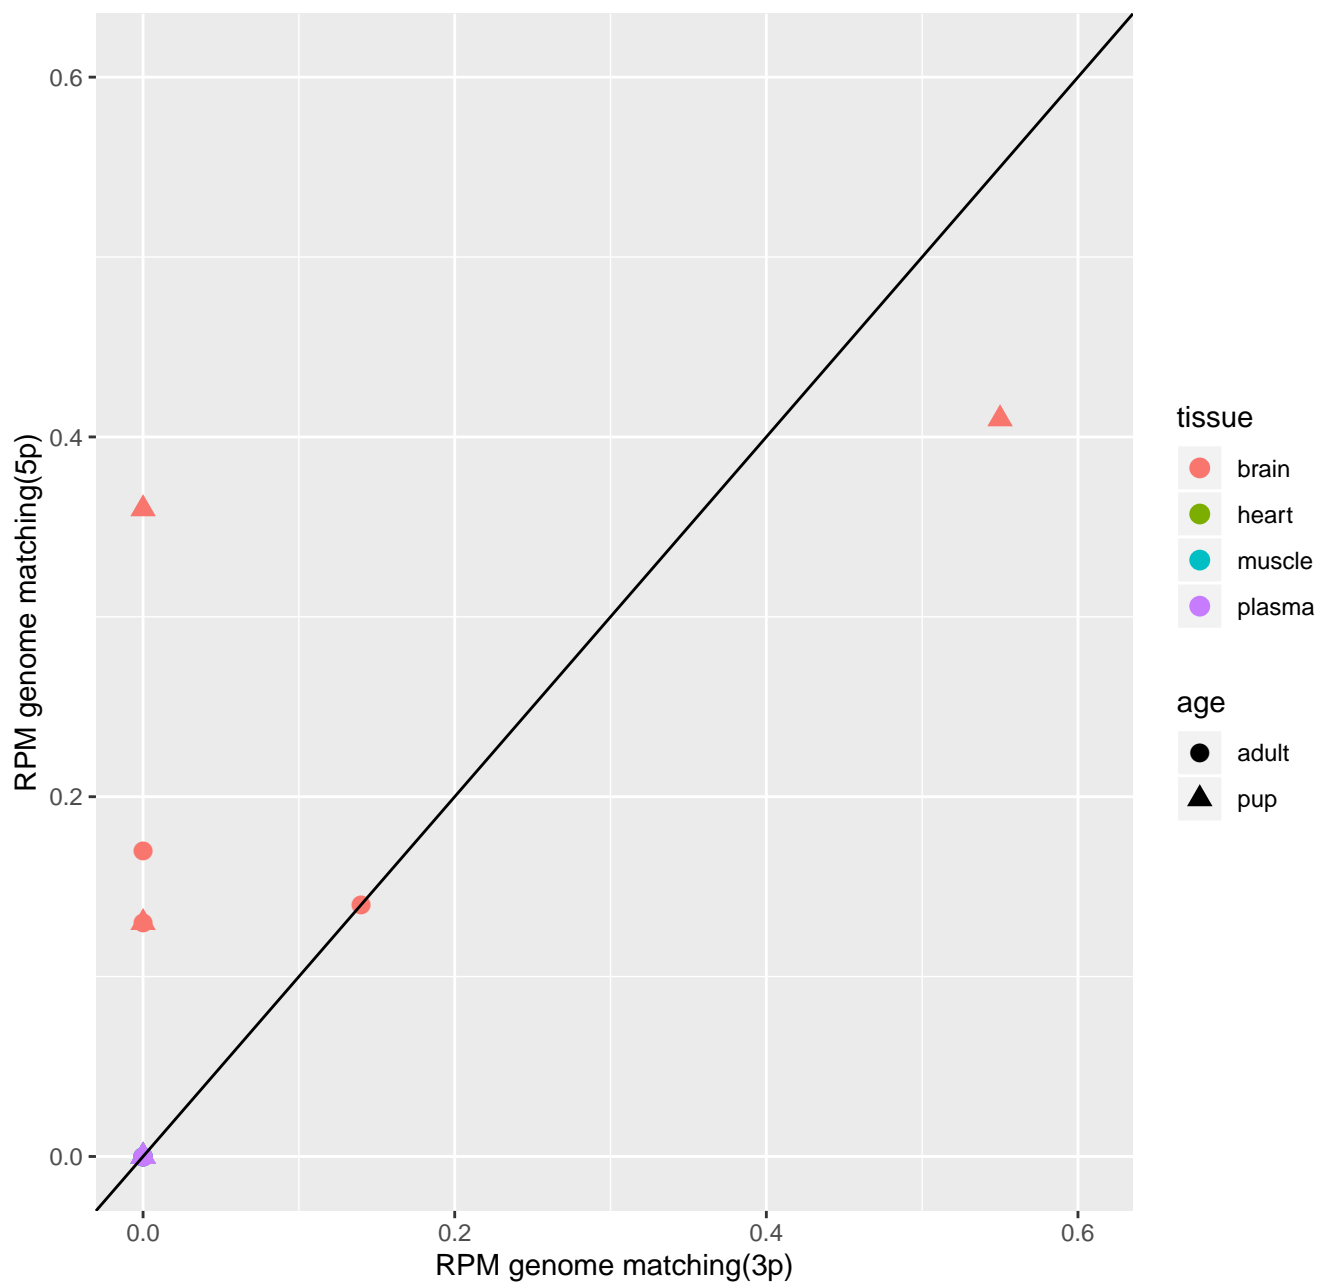

# WS\_miRDeep2\_novel\_44

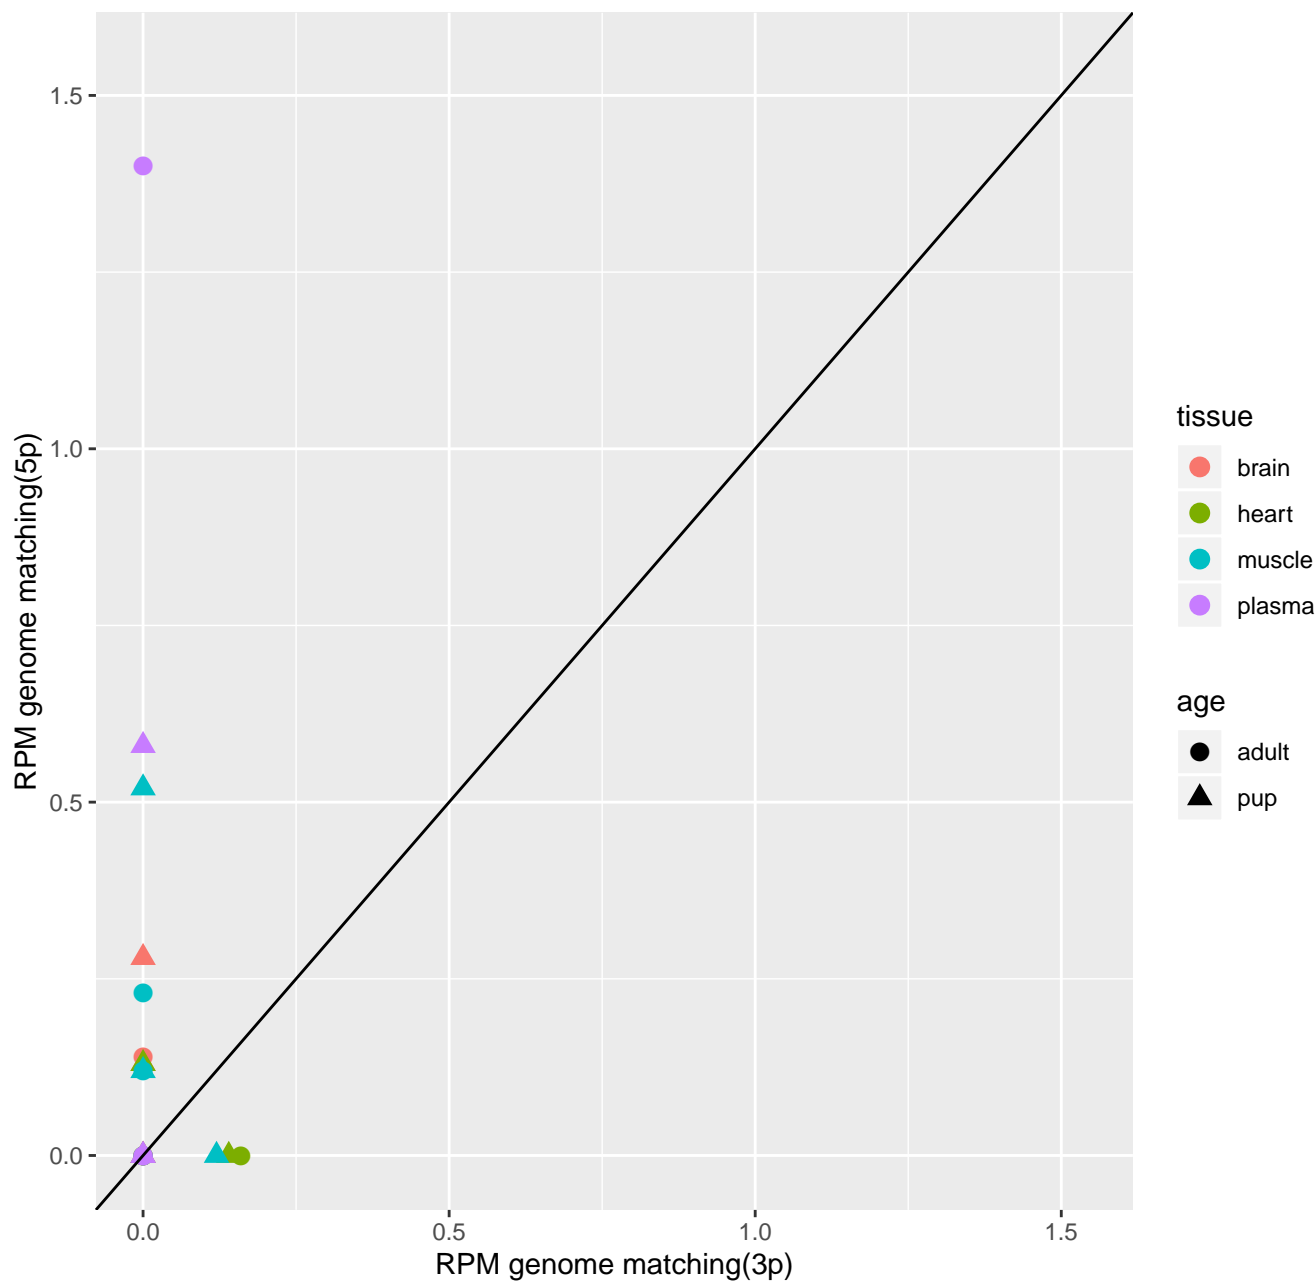

## lwe-miR-15a\_miRDeep2\_loc1

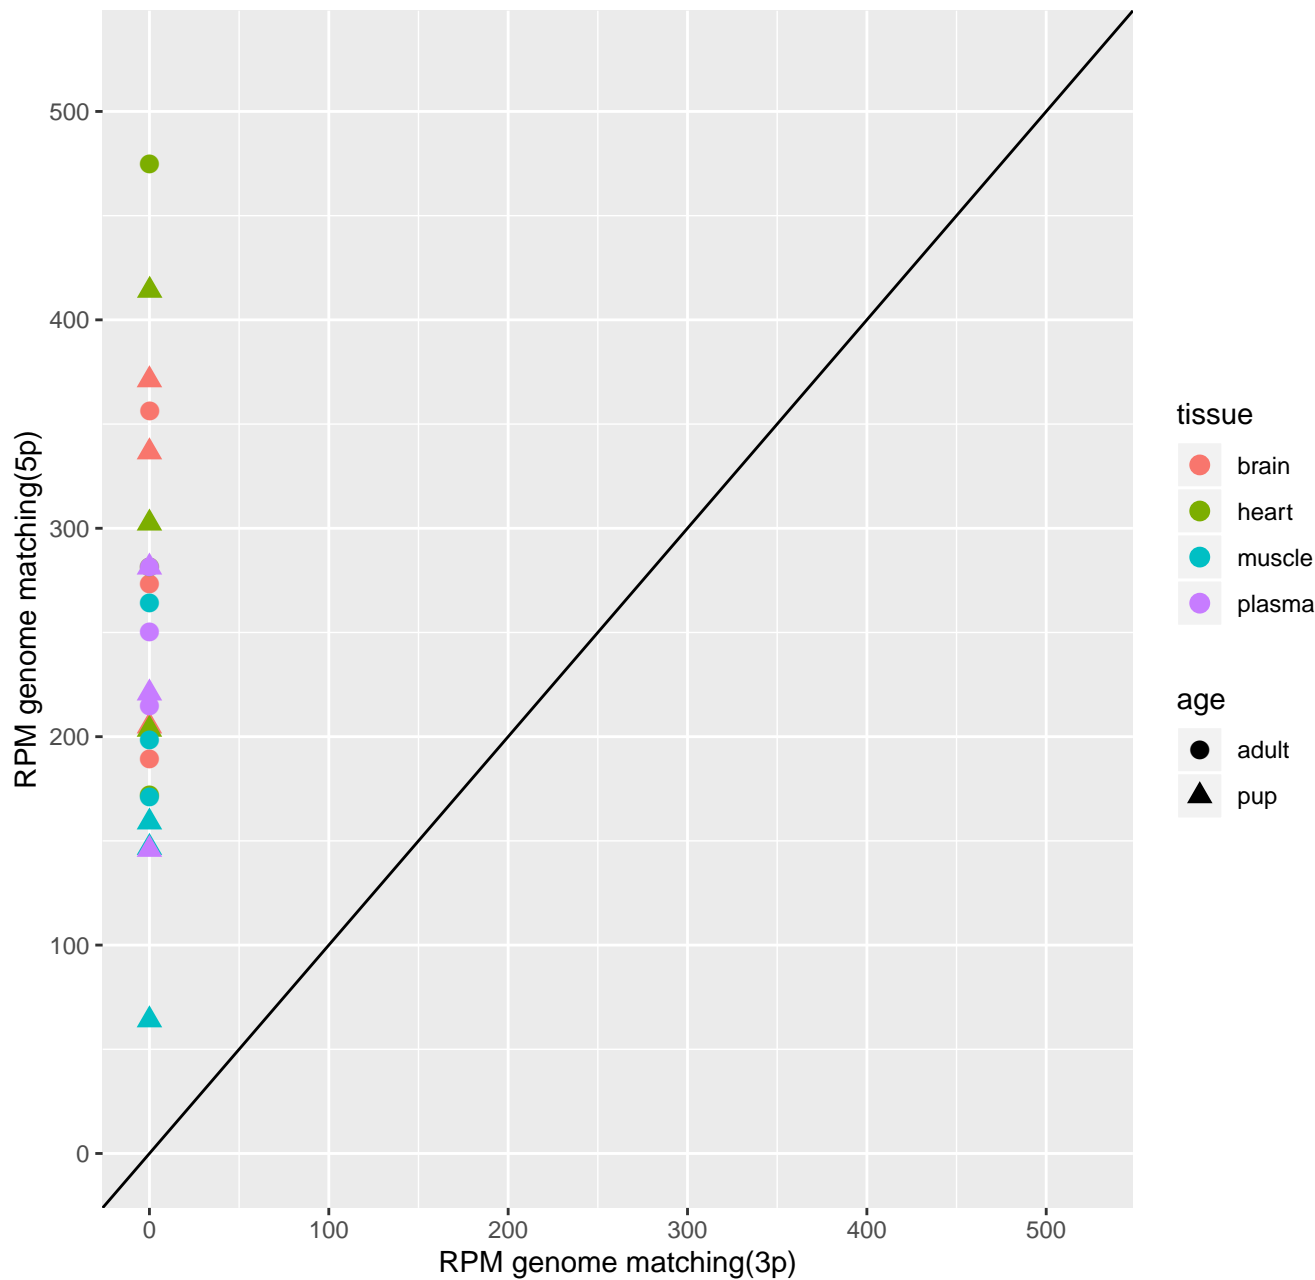

## lwe-miR-192\_miRDeep2\_loc1

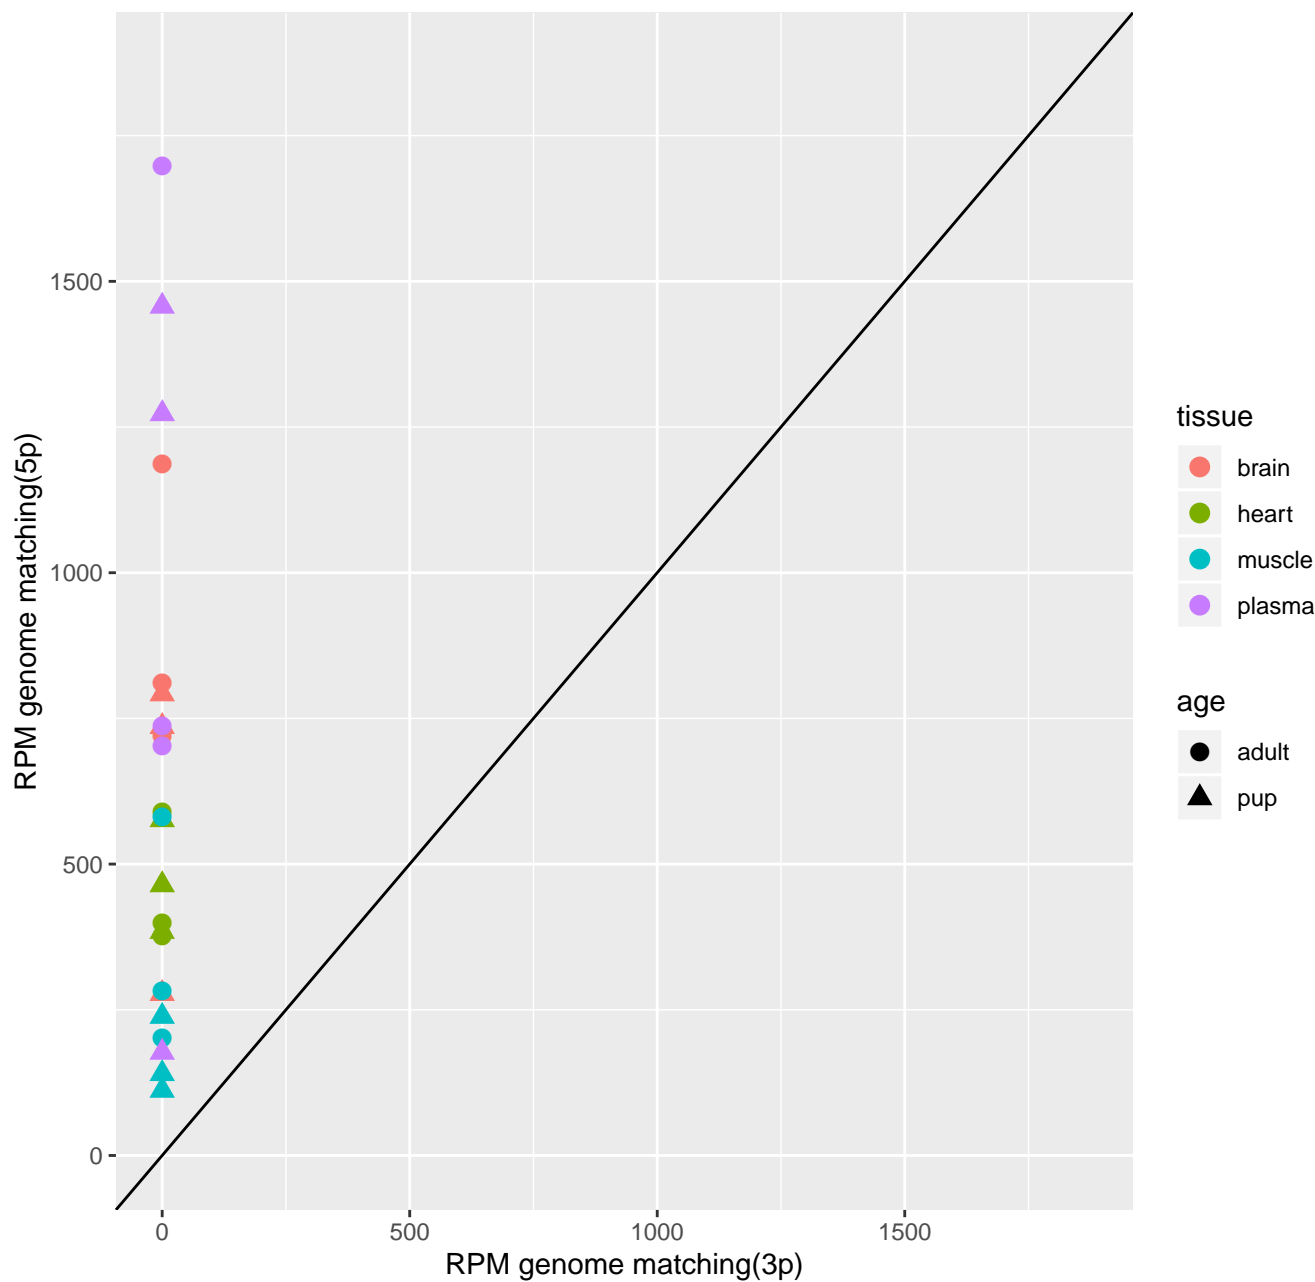



## lwe-miR-194\_miRDeep2\_loc1

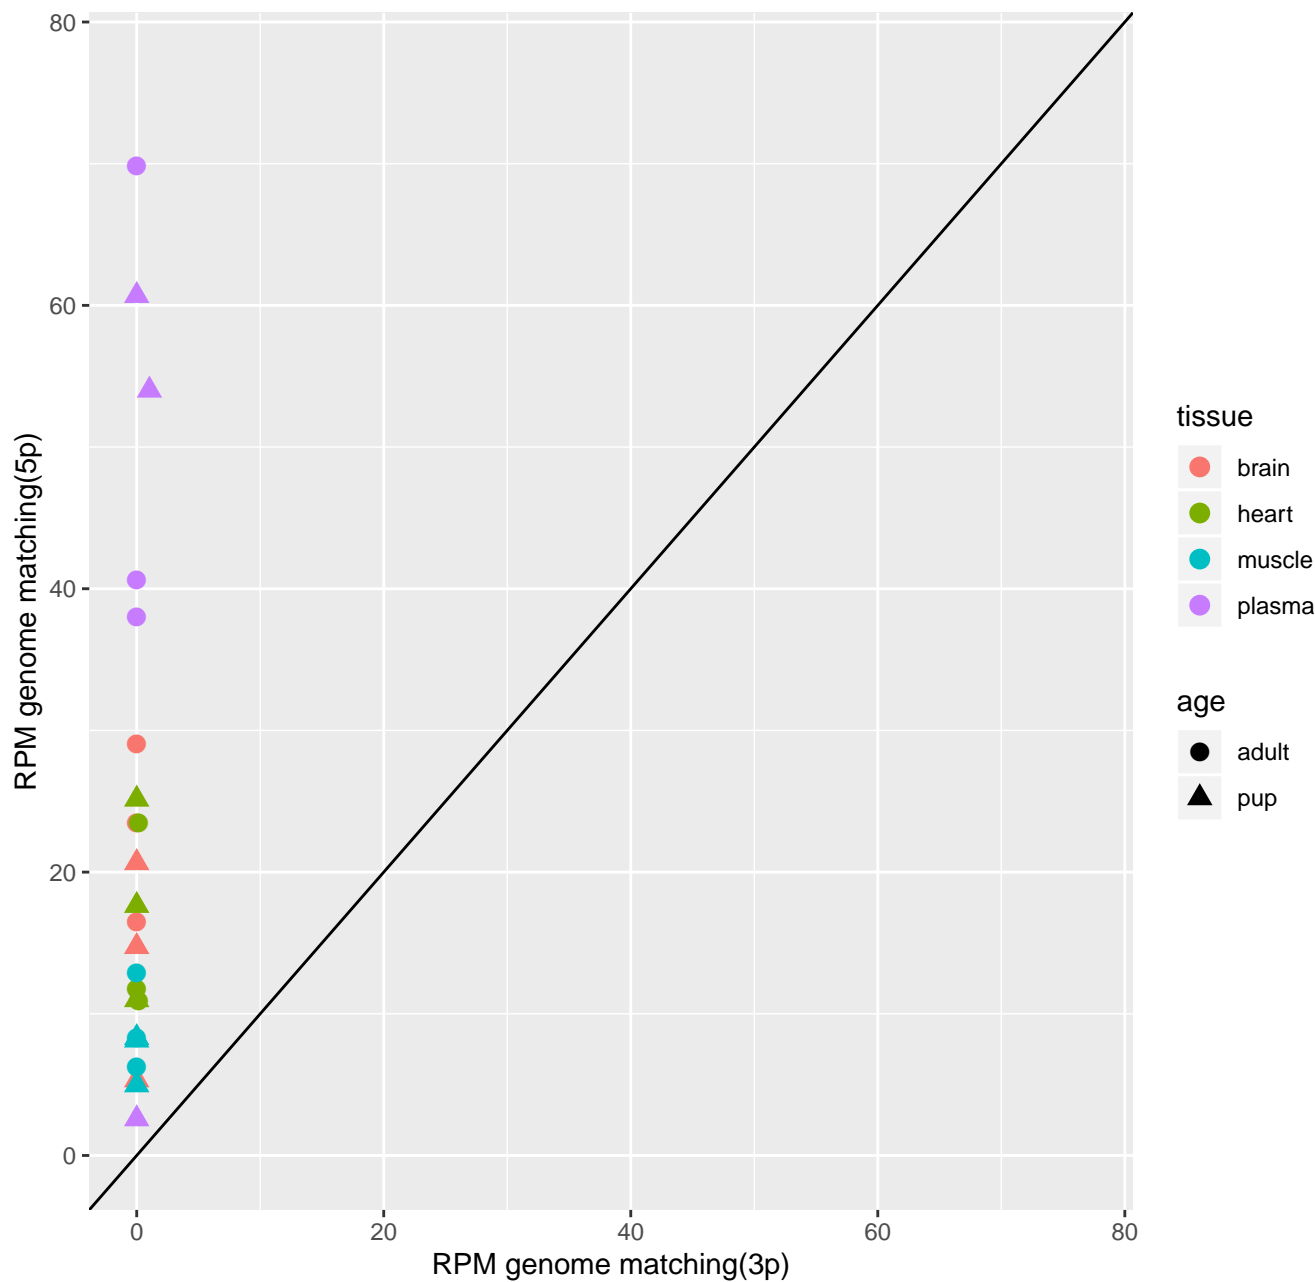

# WS\_miRDeep2\_novel\_45

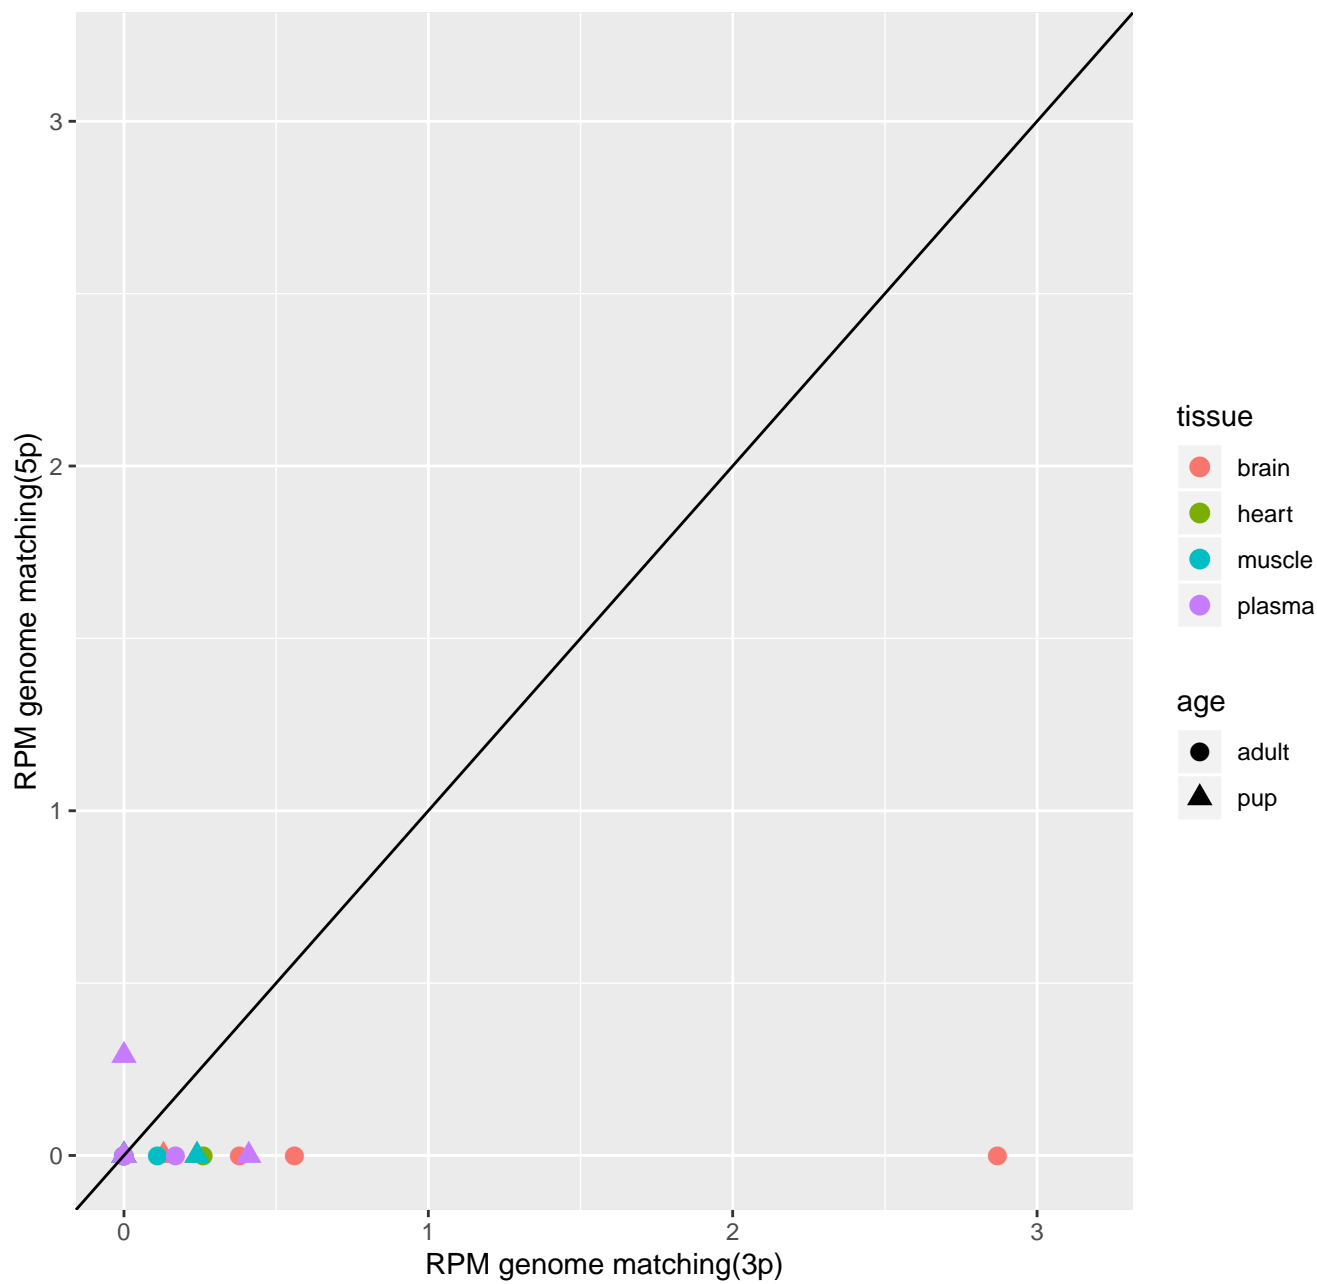



# WS\_miRDeep2\_novel\_46

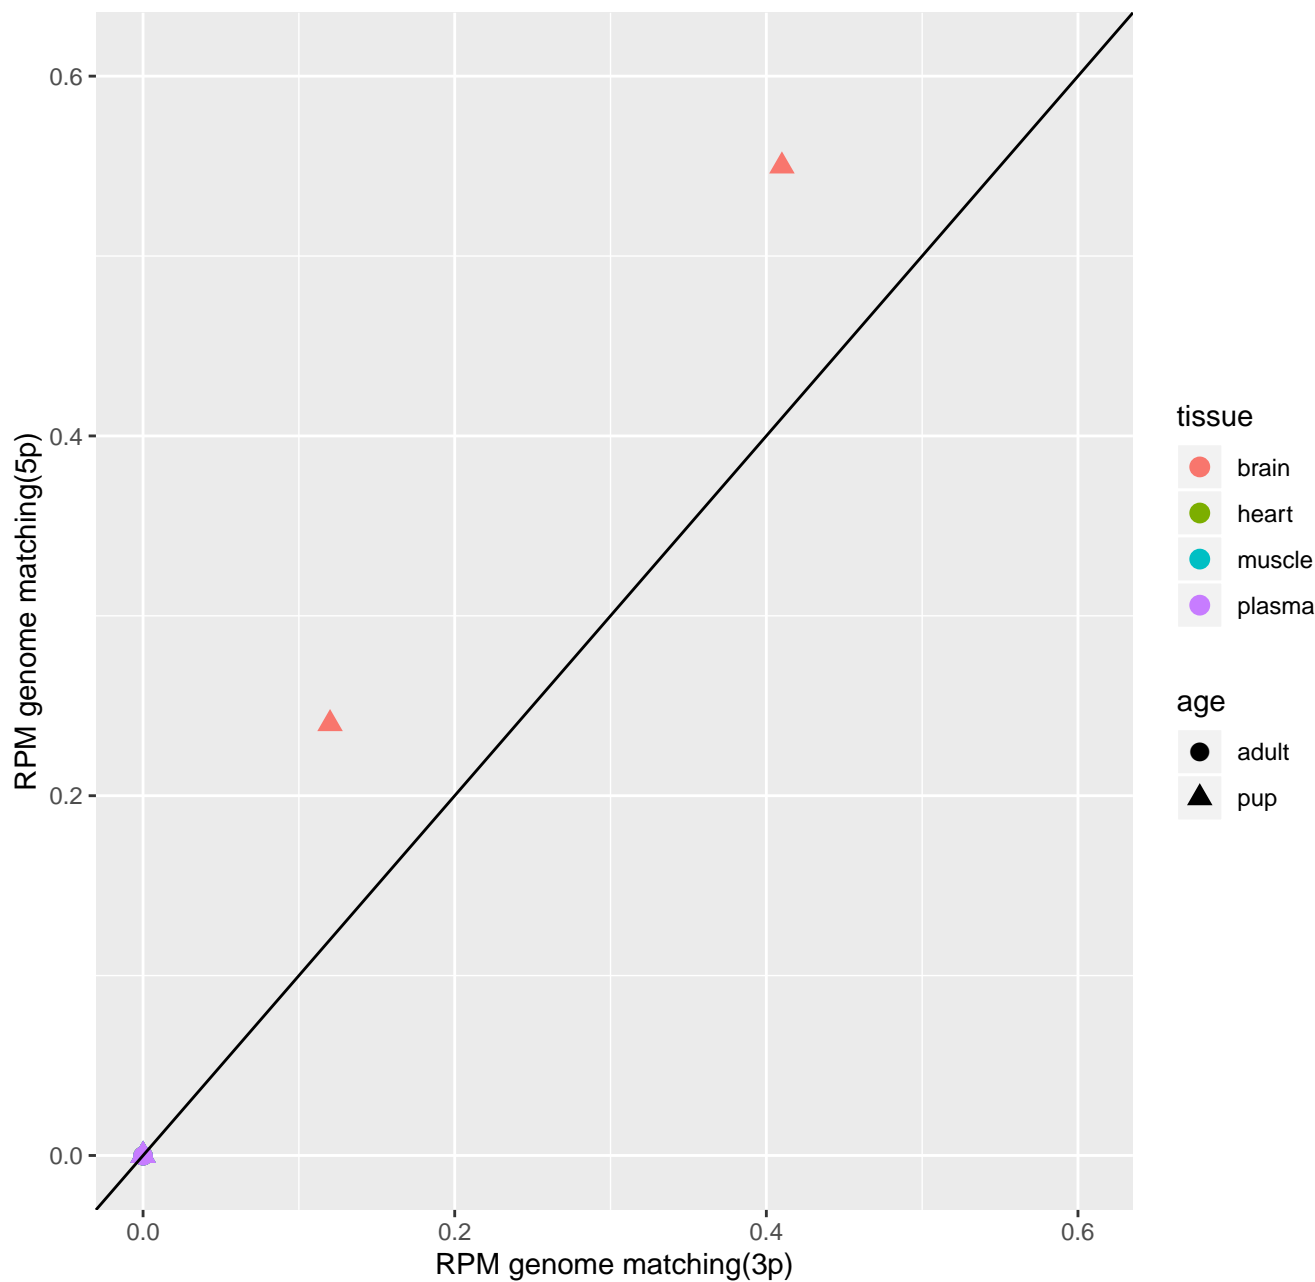

## lwe-miR-214;lwe-miR-3120\_loc1"

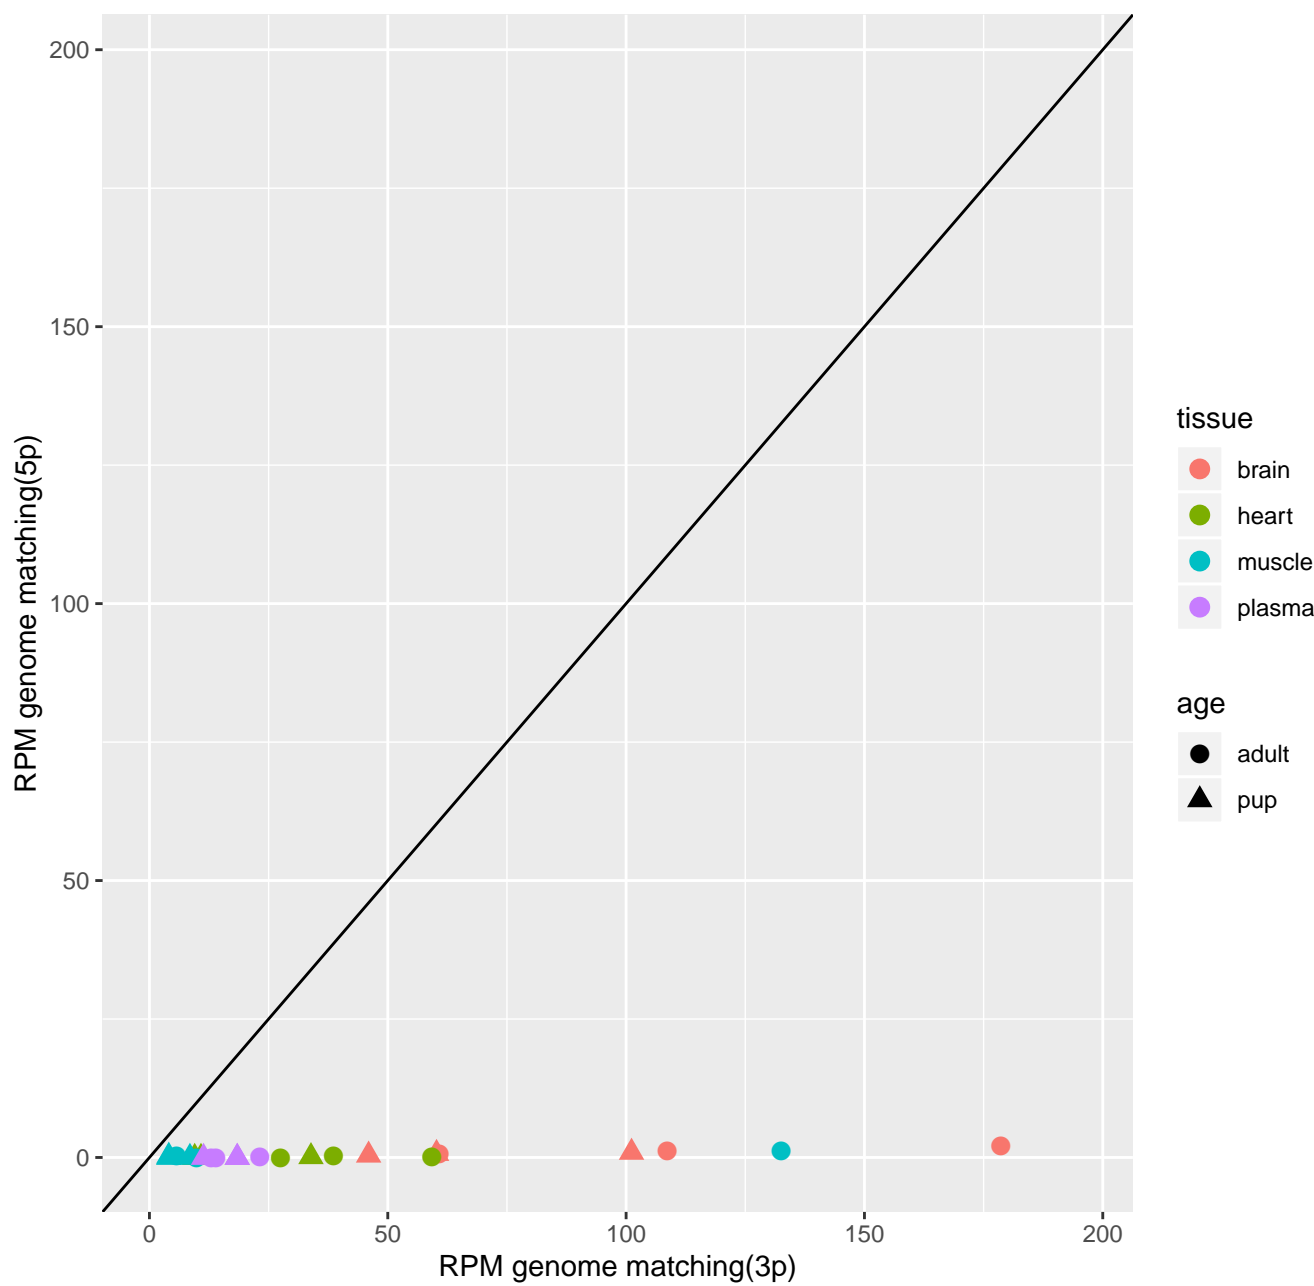

## lwe-miR-214\_miRDeep2\_loc1

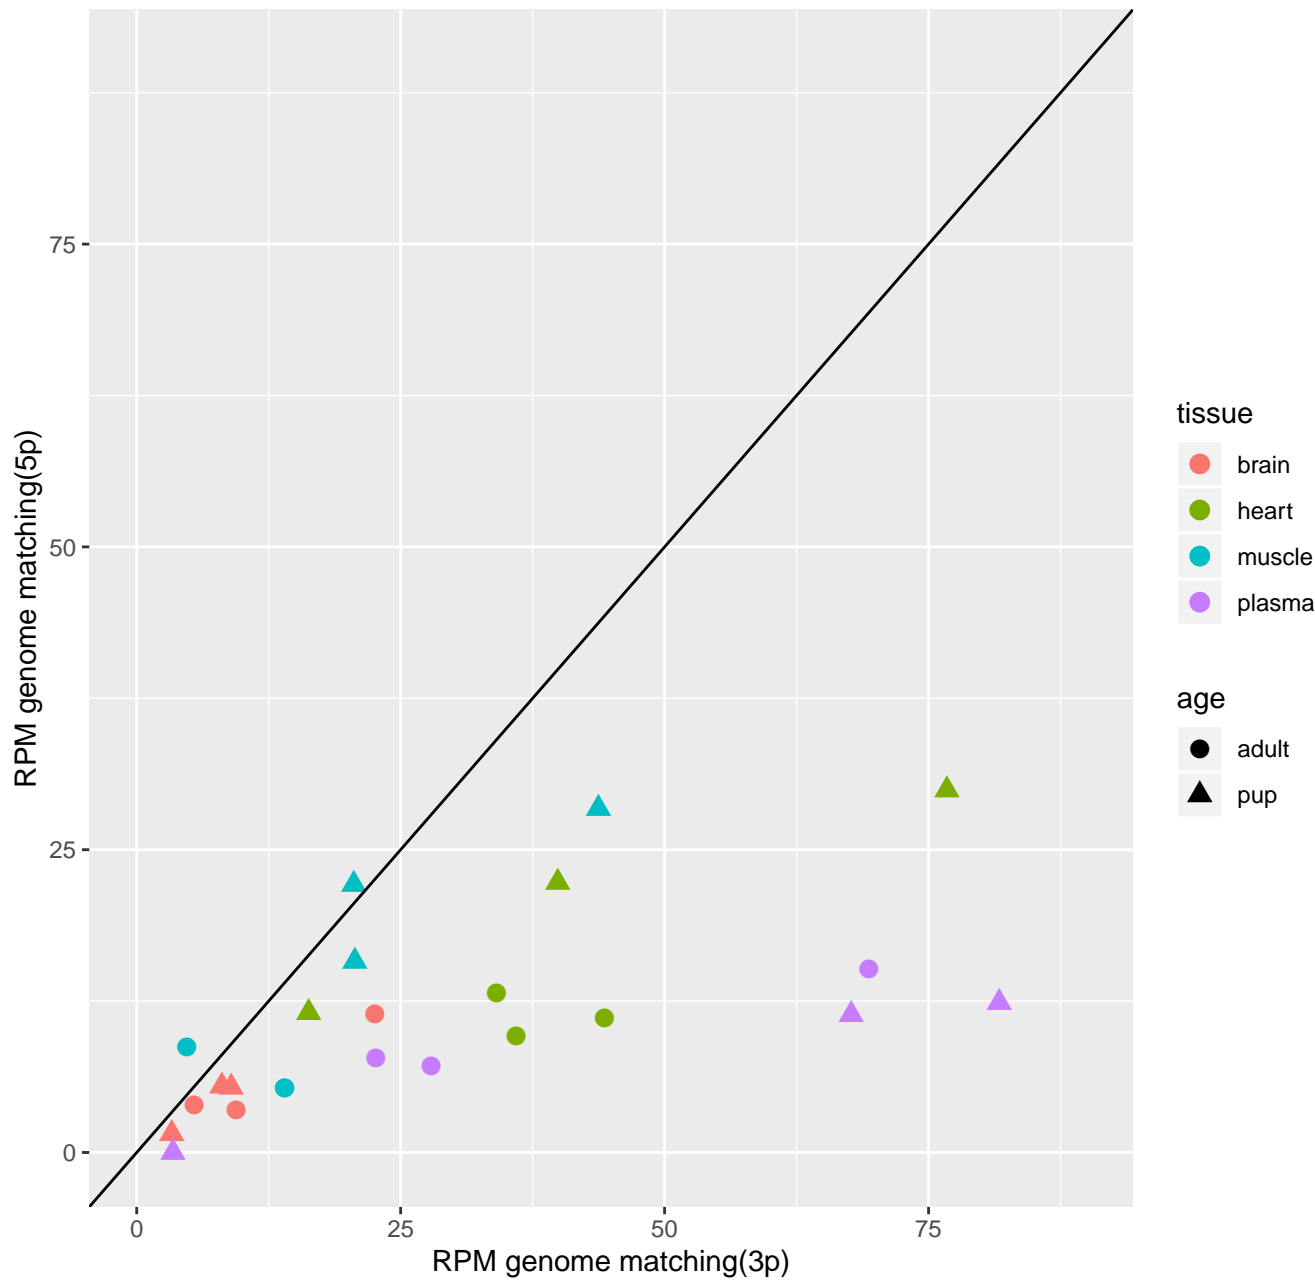

WS\_miRDeep2\_novel\_48

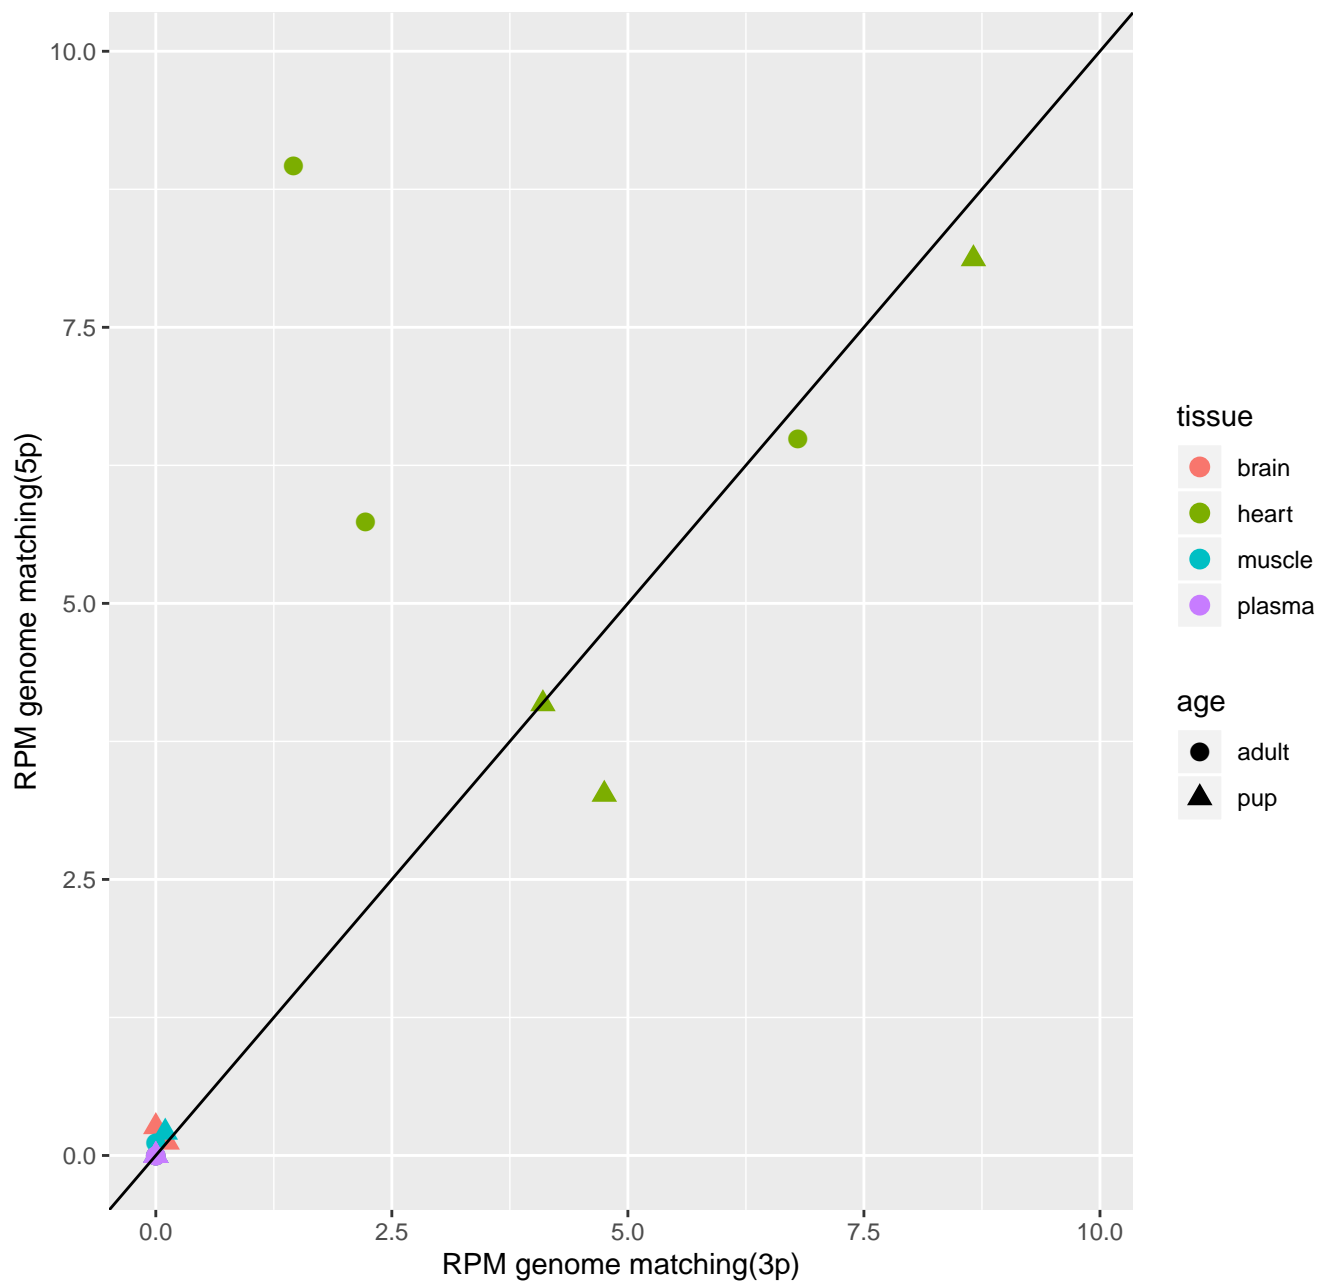

WS\_miRDeep2\_novel\_49

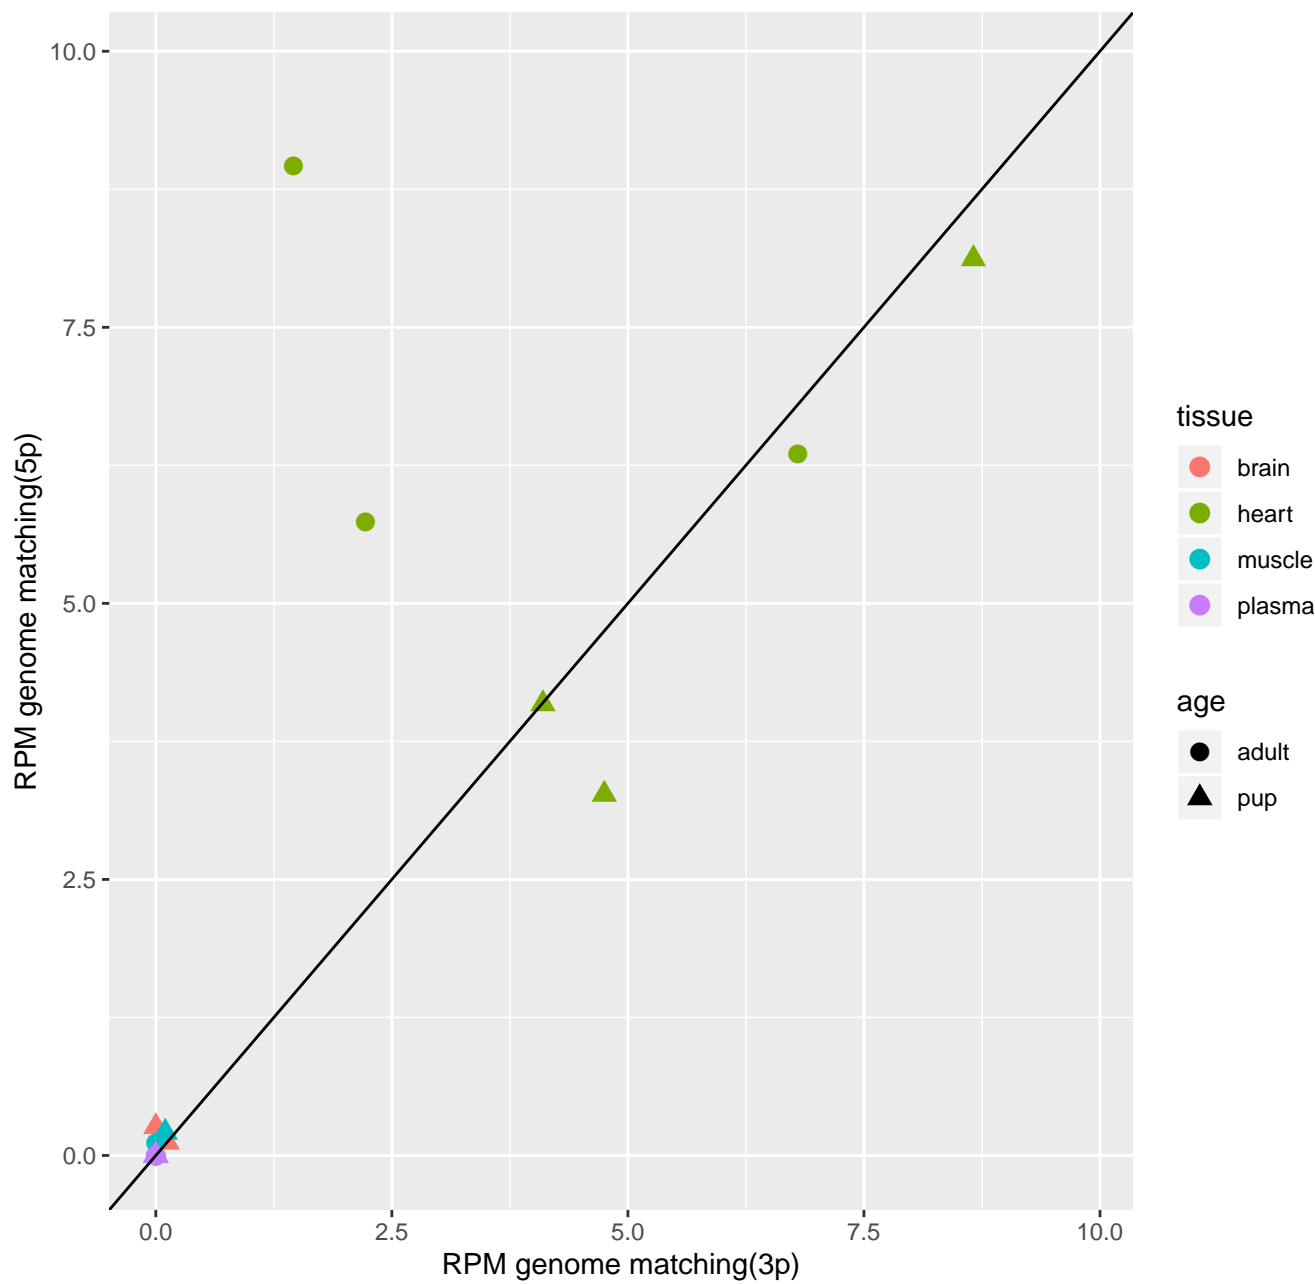



WS\_miRDeep2\_novel\_50

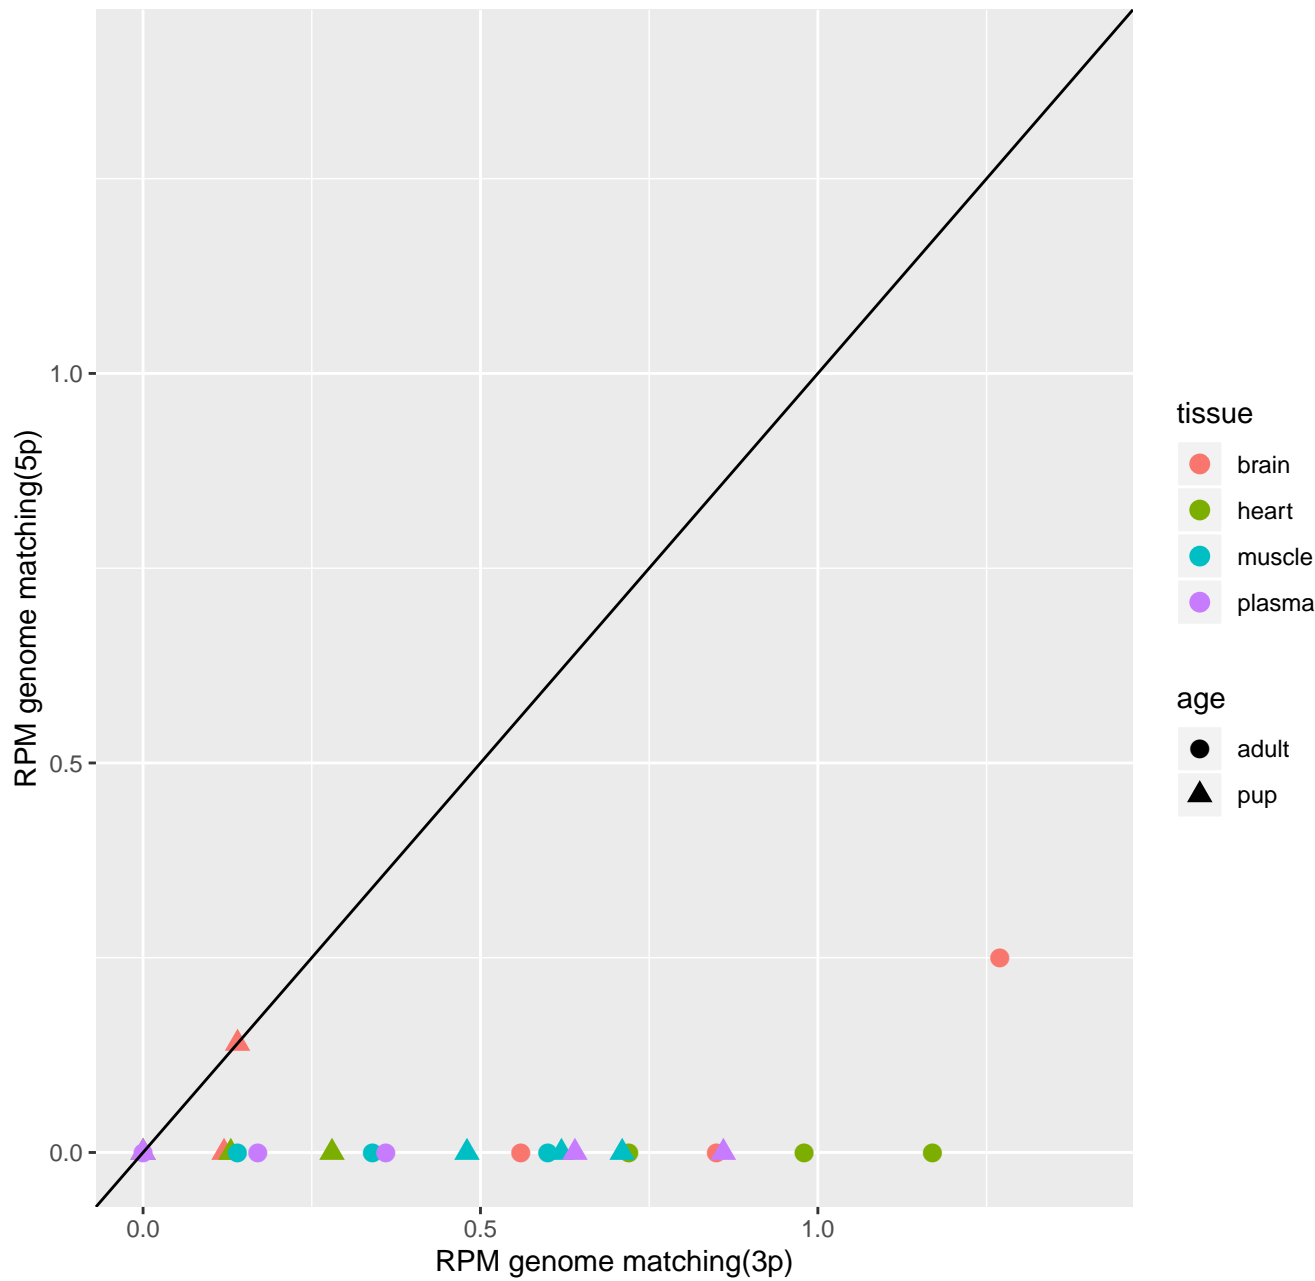

## lwe-miR-219c\_loc1

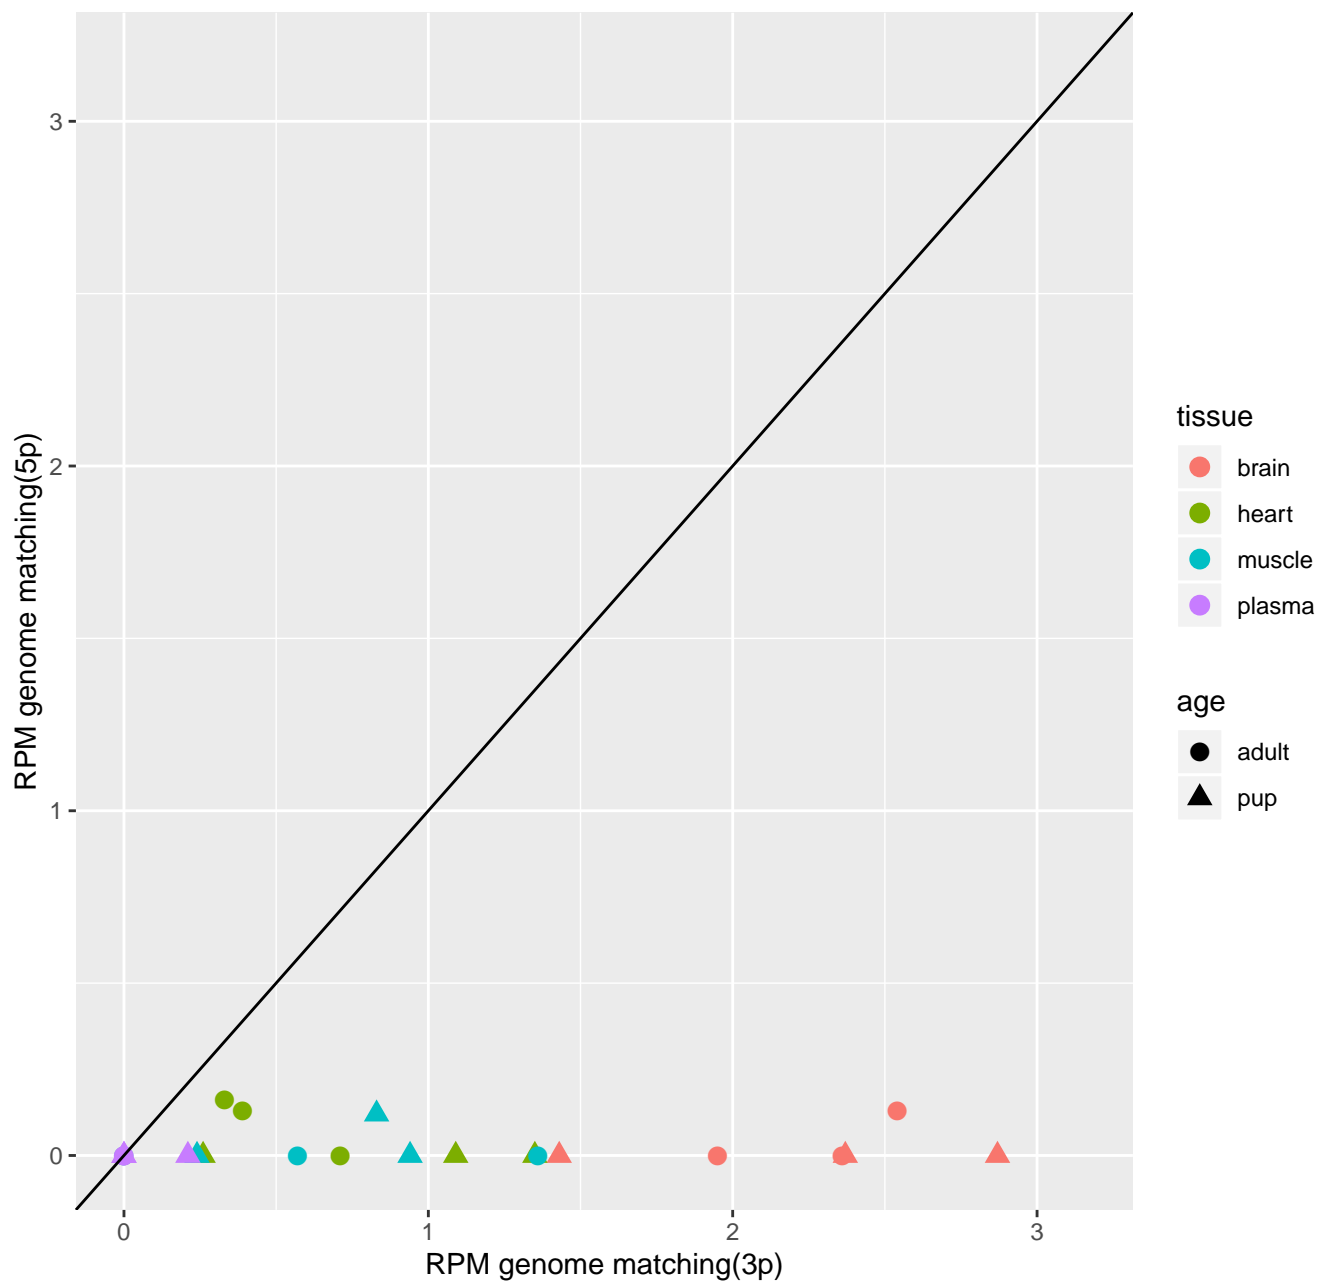

WS\_miRDeep2\_novel\_52

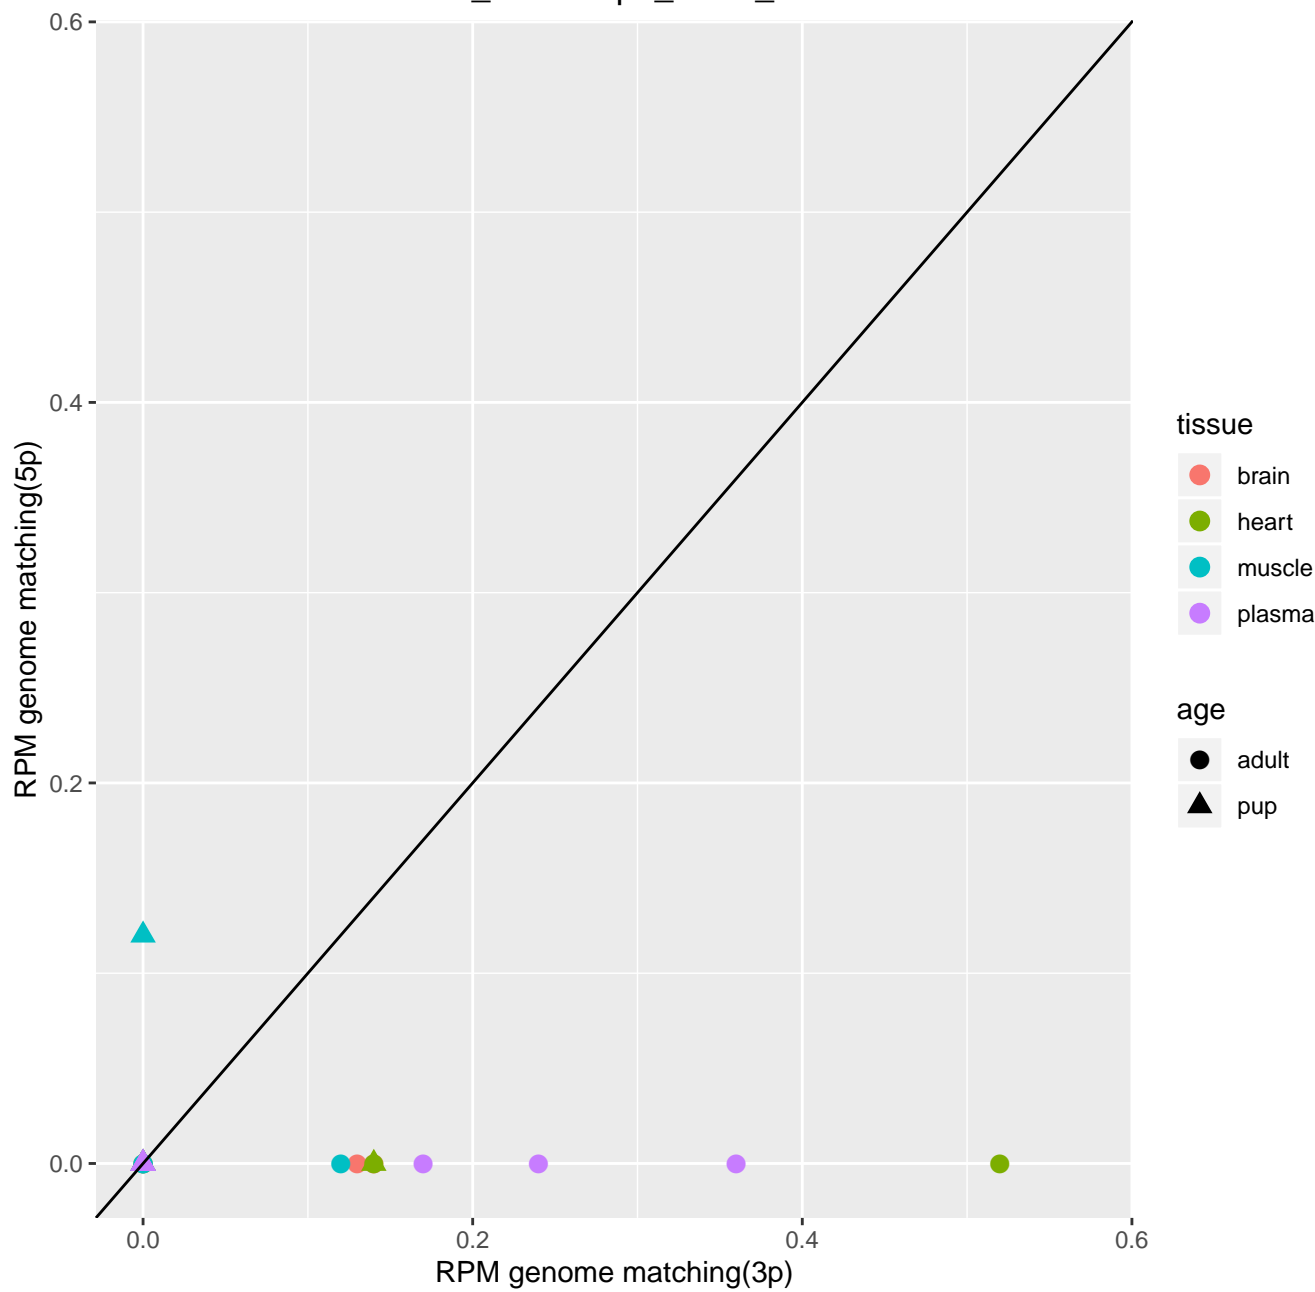

## WS\_miRDeep2\_novel\_53

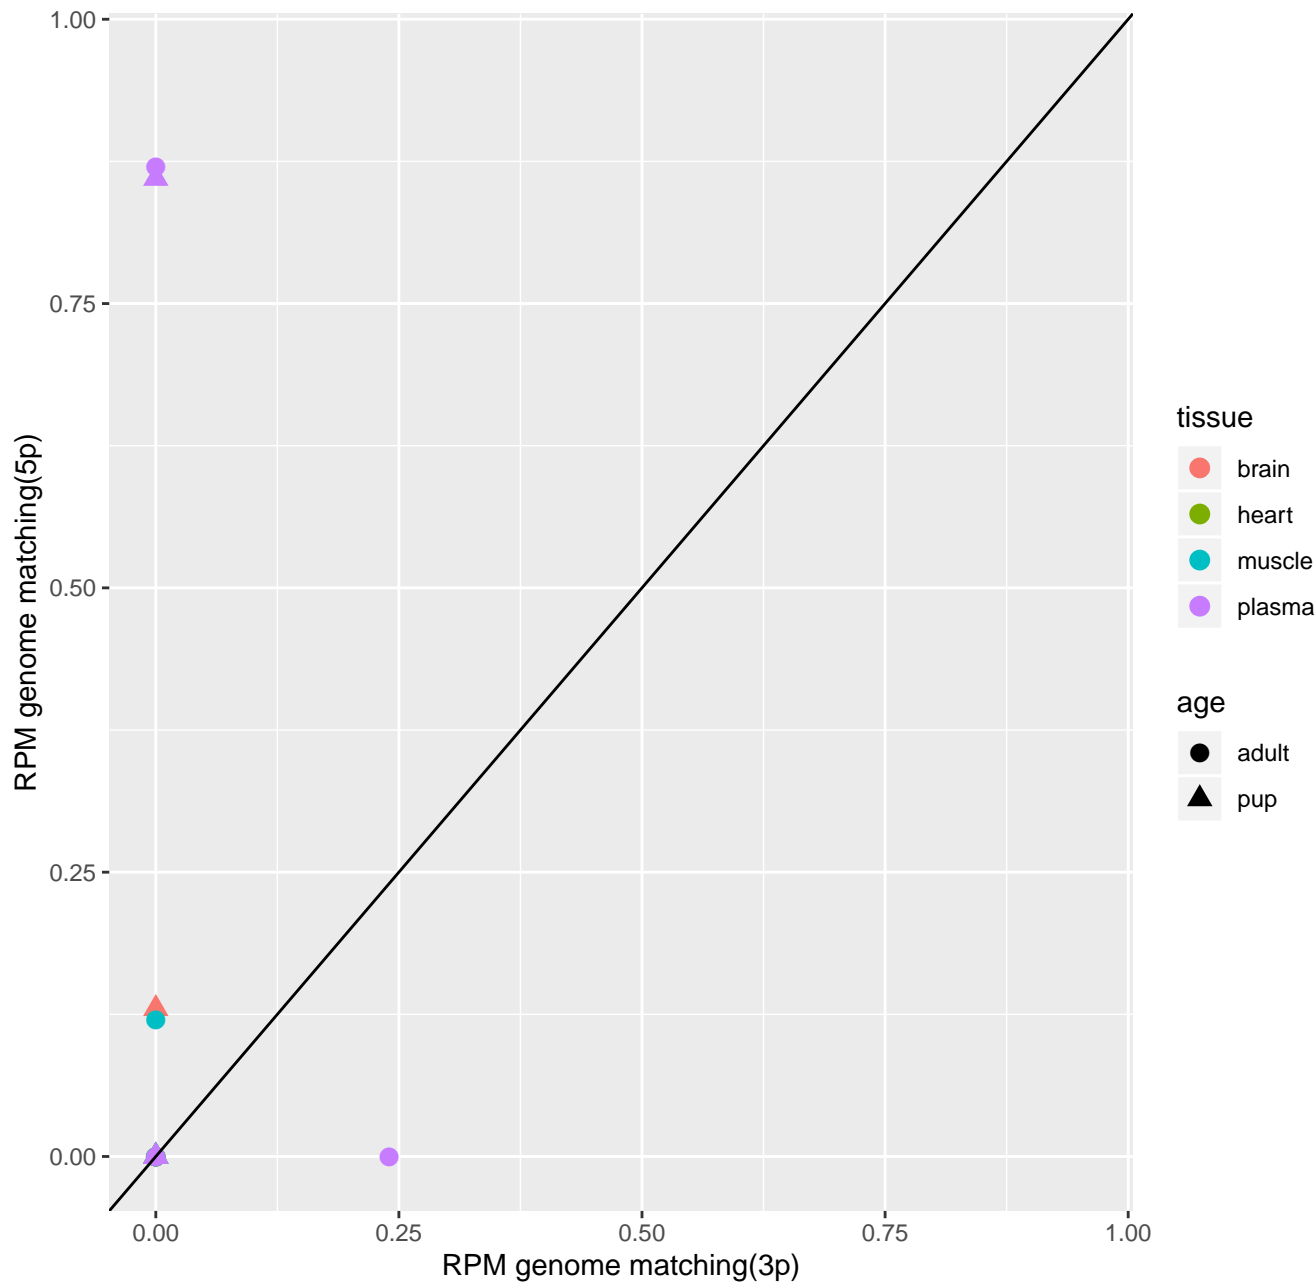

# WS\_miRDeep2\_novel\_54

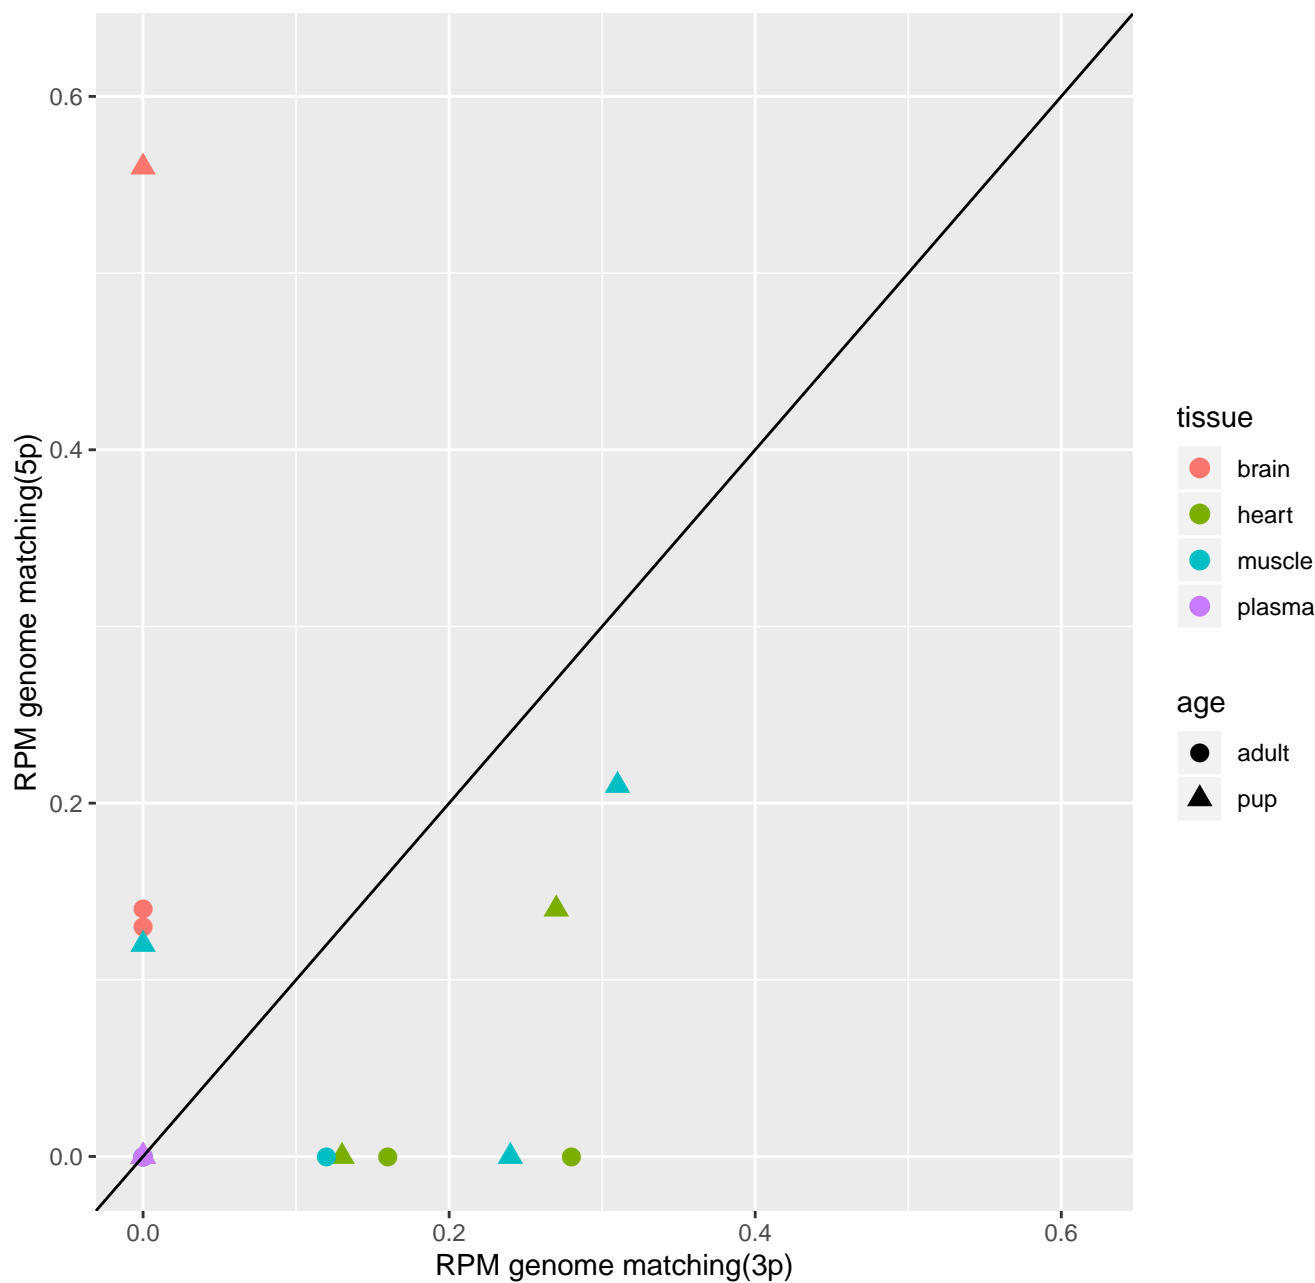

# WS\_miRDeep2\_novel\_55

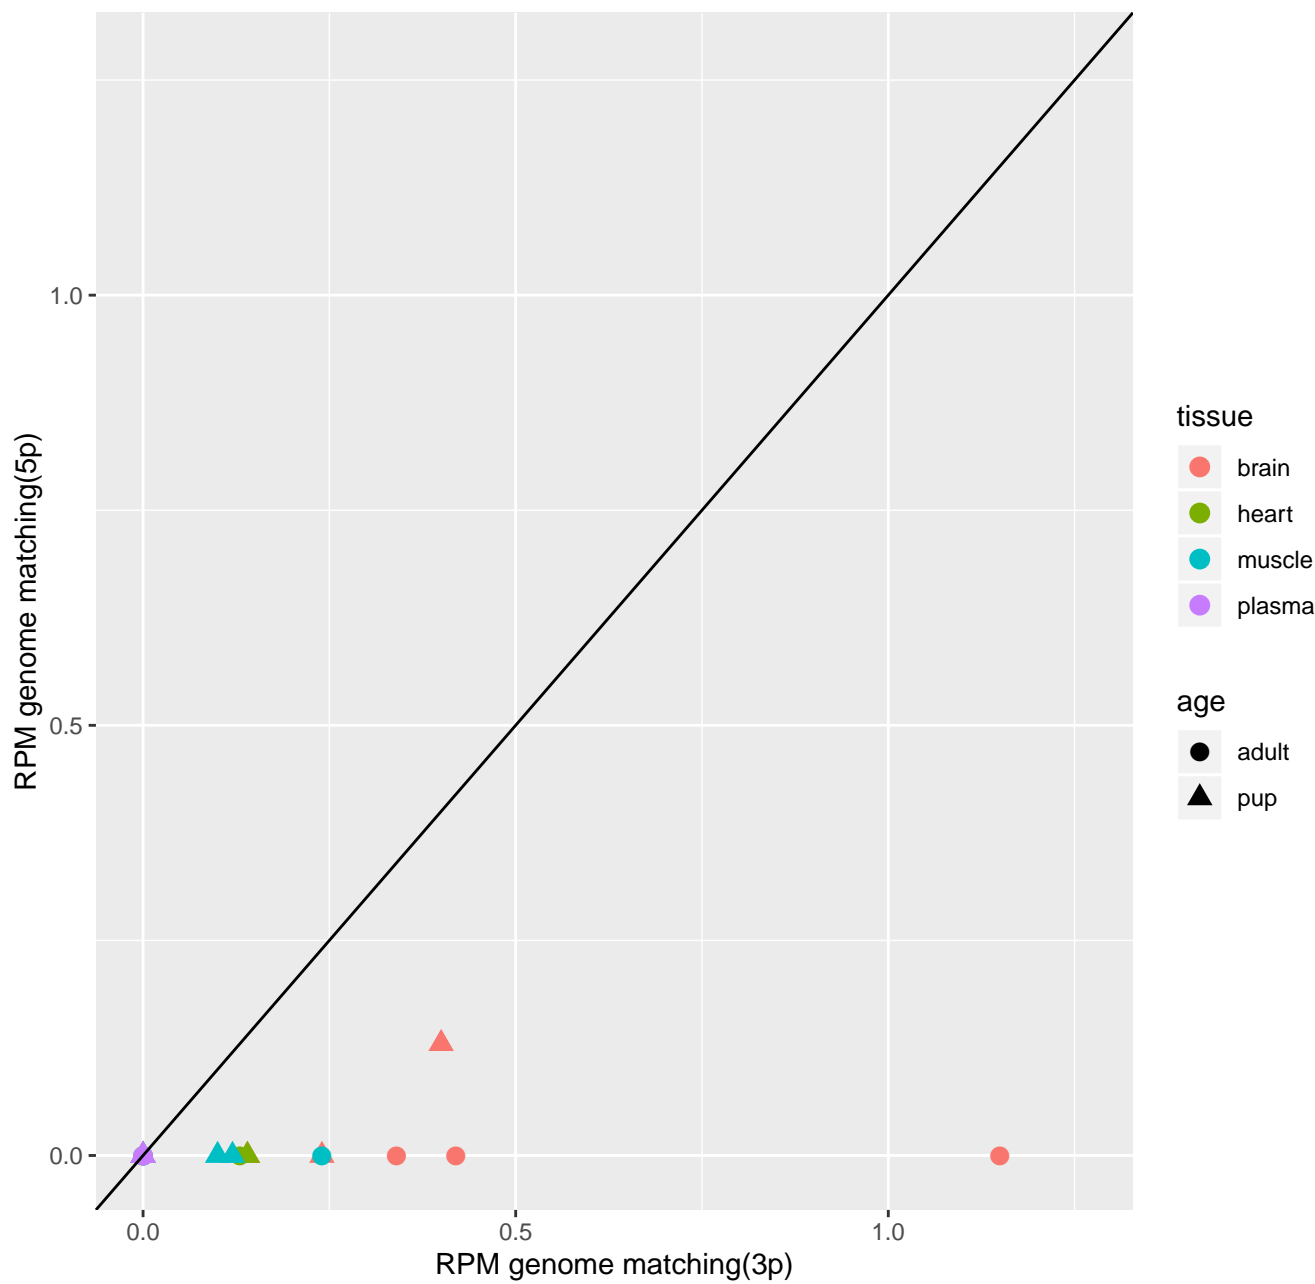

## lwe-miR-1839\_miRDeep2\_loc1

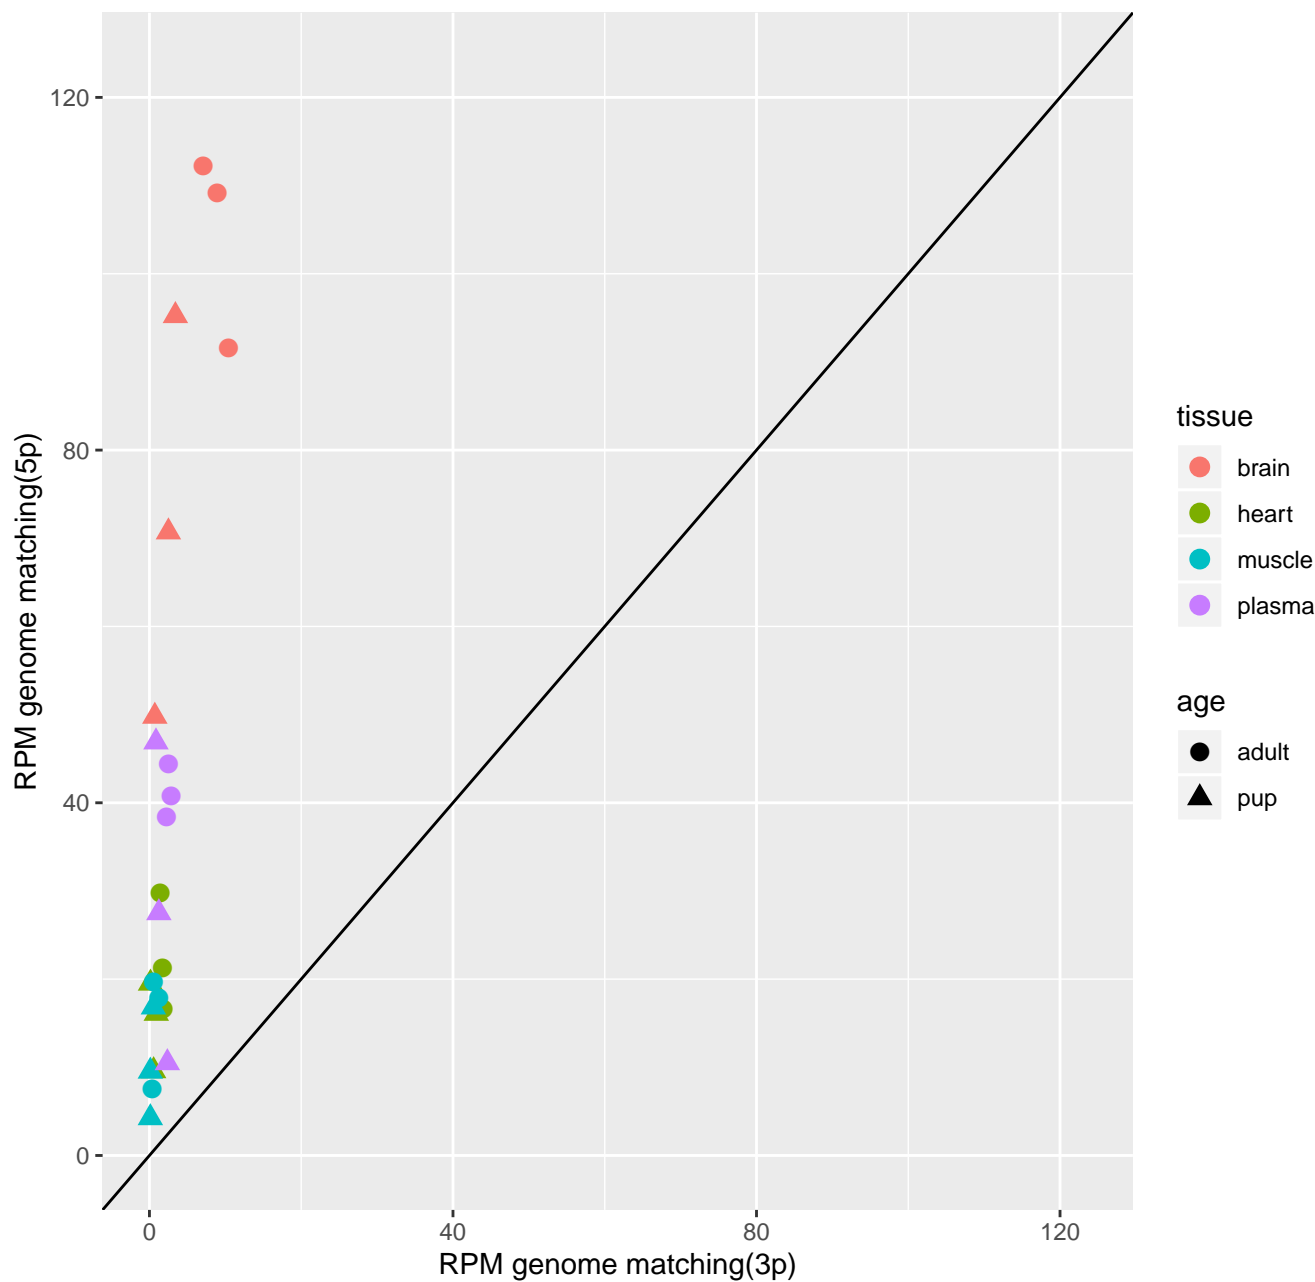

## WS\_miRDeep2\_novel\_56

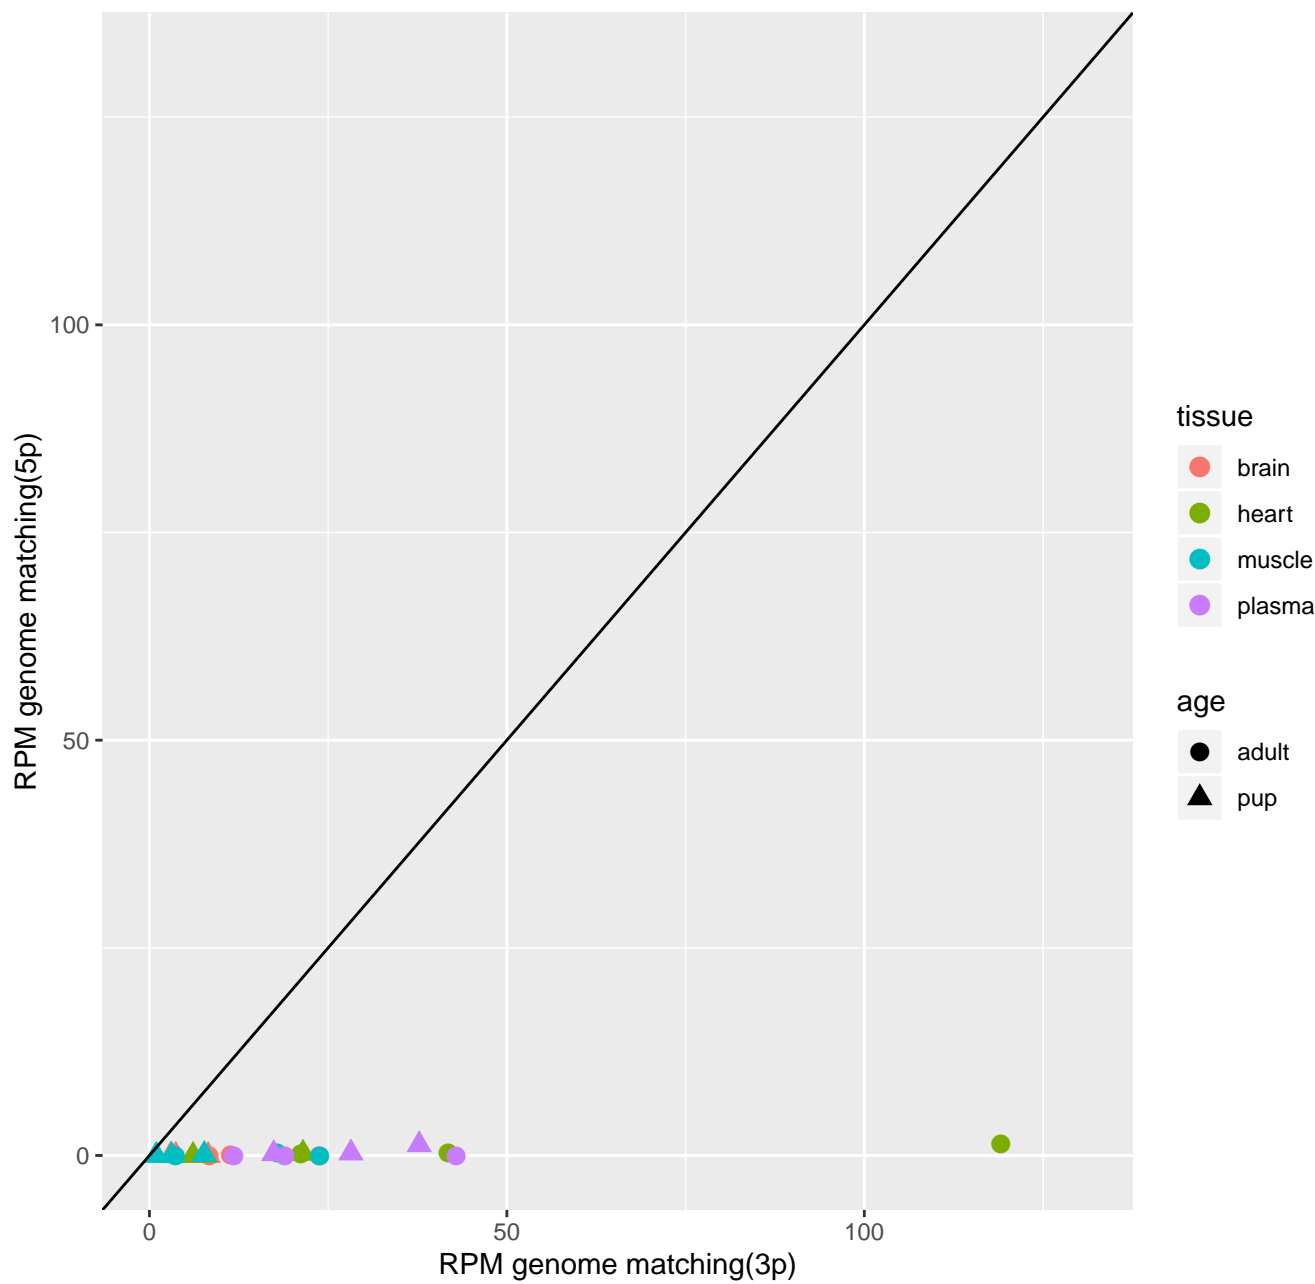



## WS\_miRDeep2\_novel\_57

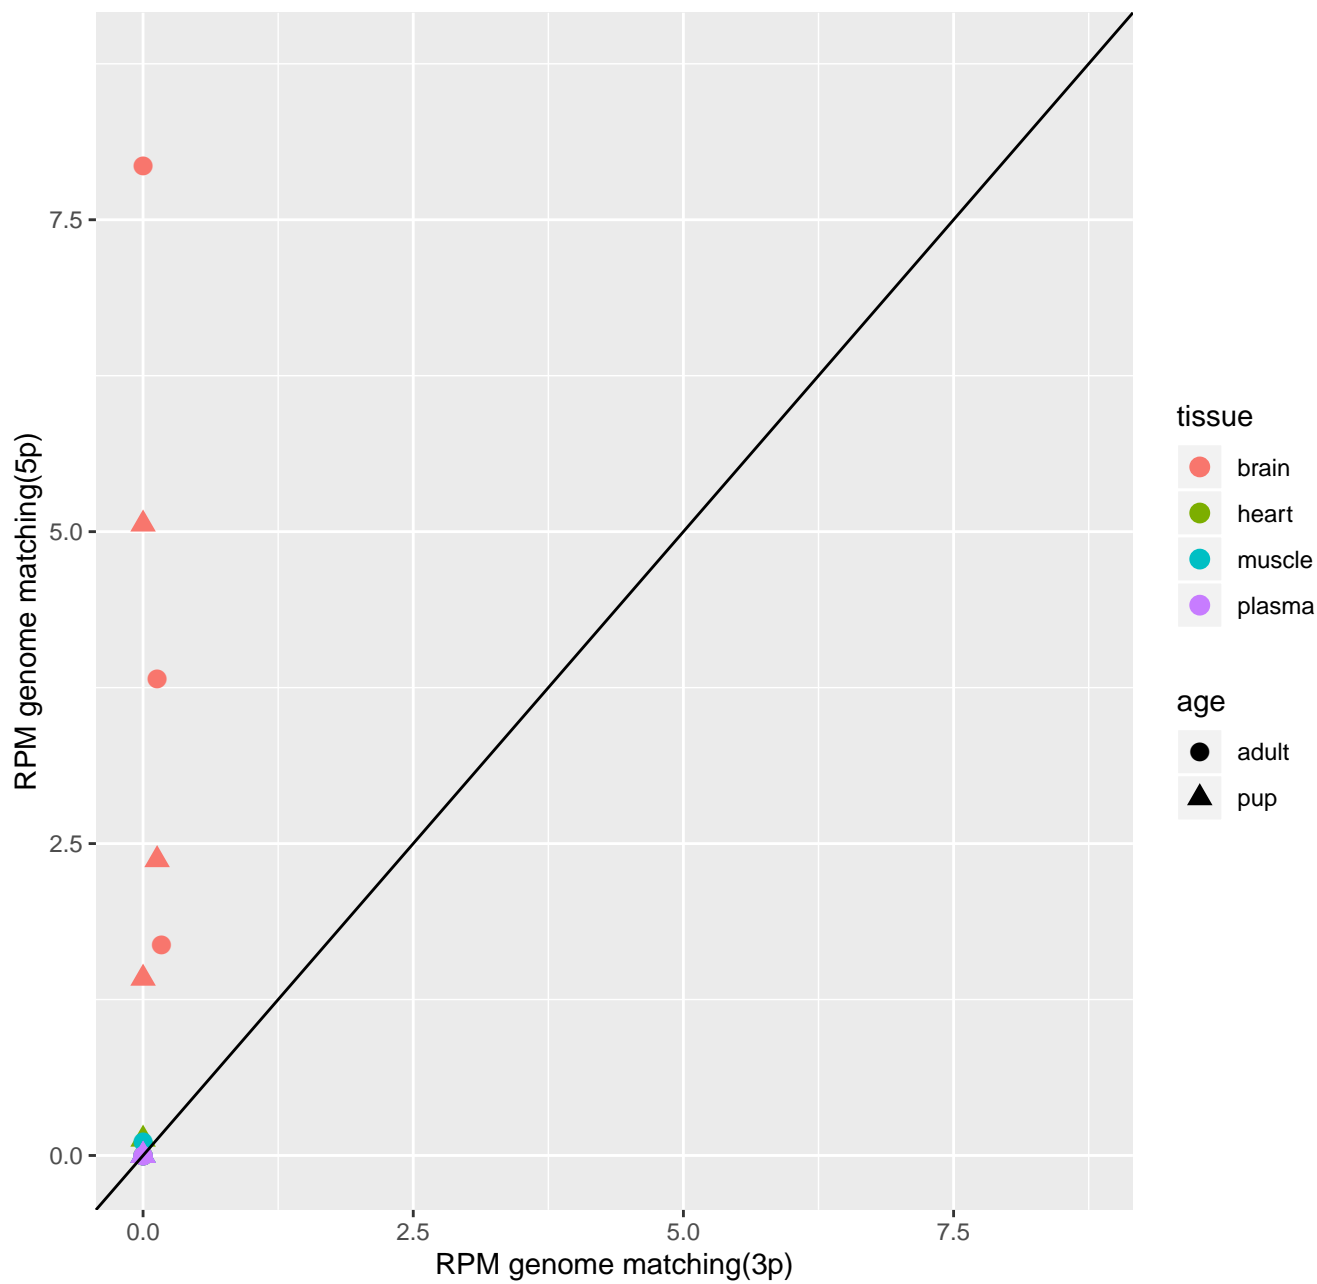

# WS\_miRDeep2\_novel\_58

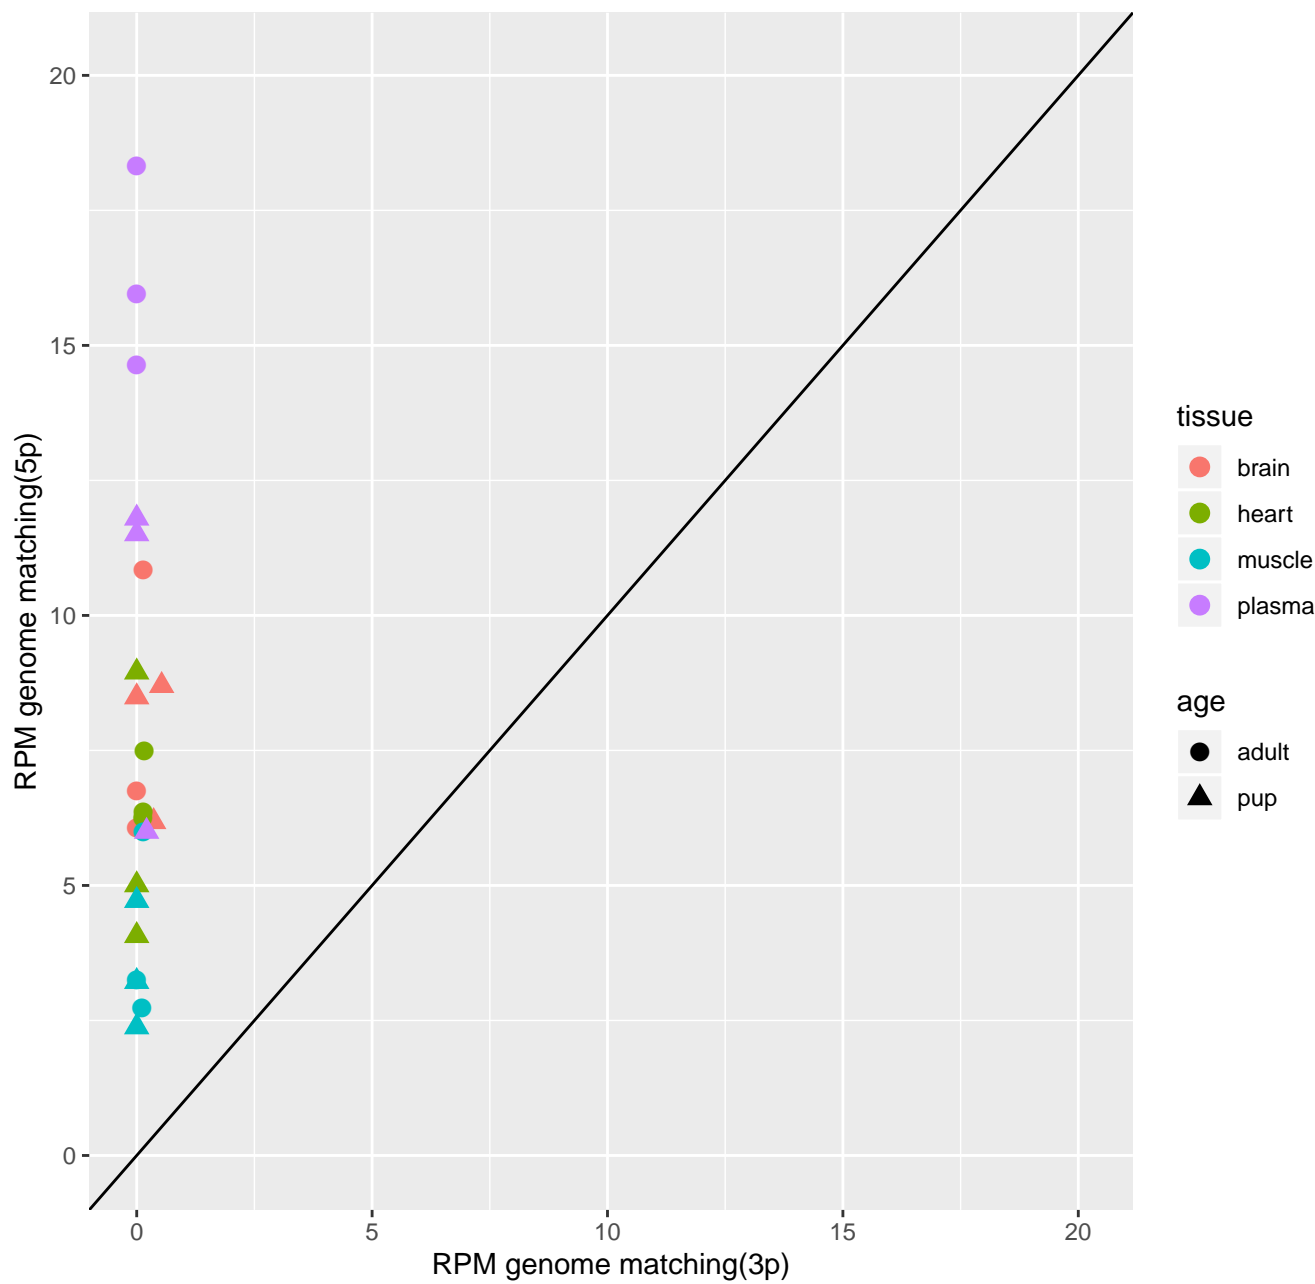

## lwe-miR-30a\_miRDeep2\_loc1

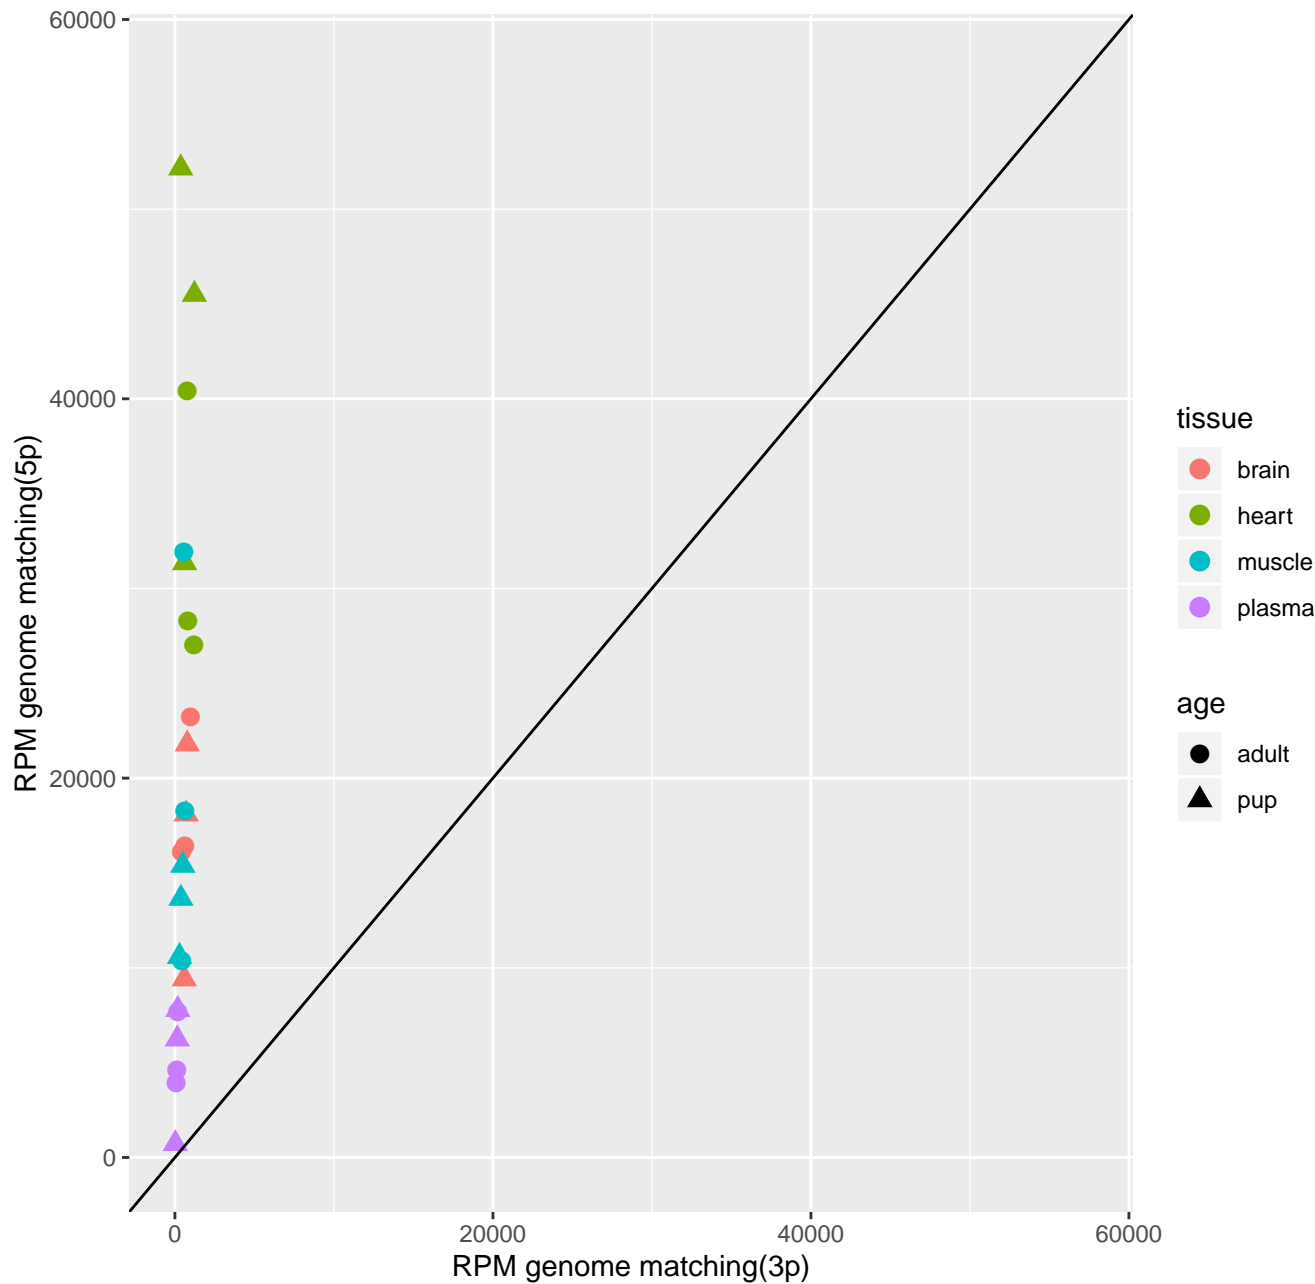

## lwe-miR-30c\_miRDeep2\_loc1

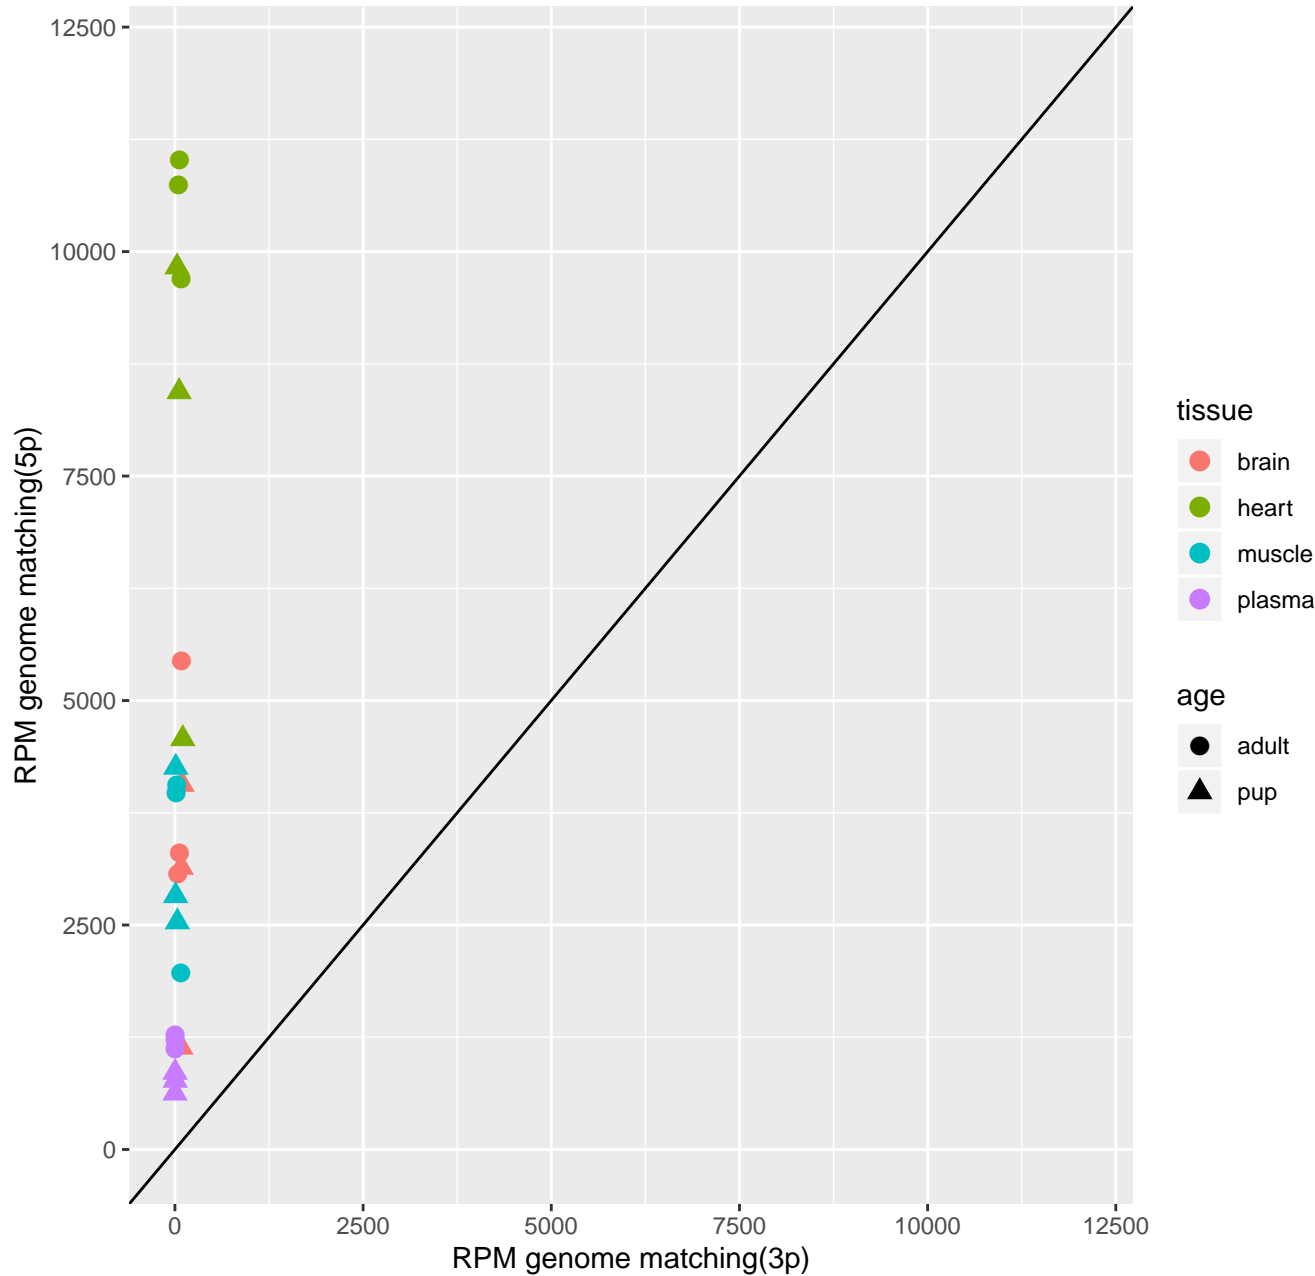

WS\_miRDeep2\_novel\_59

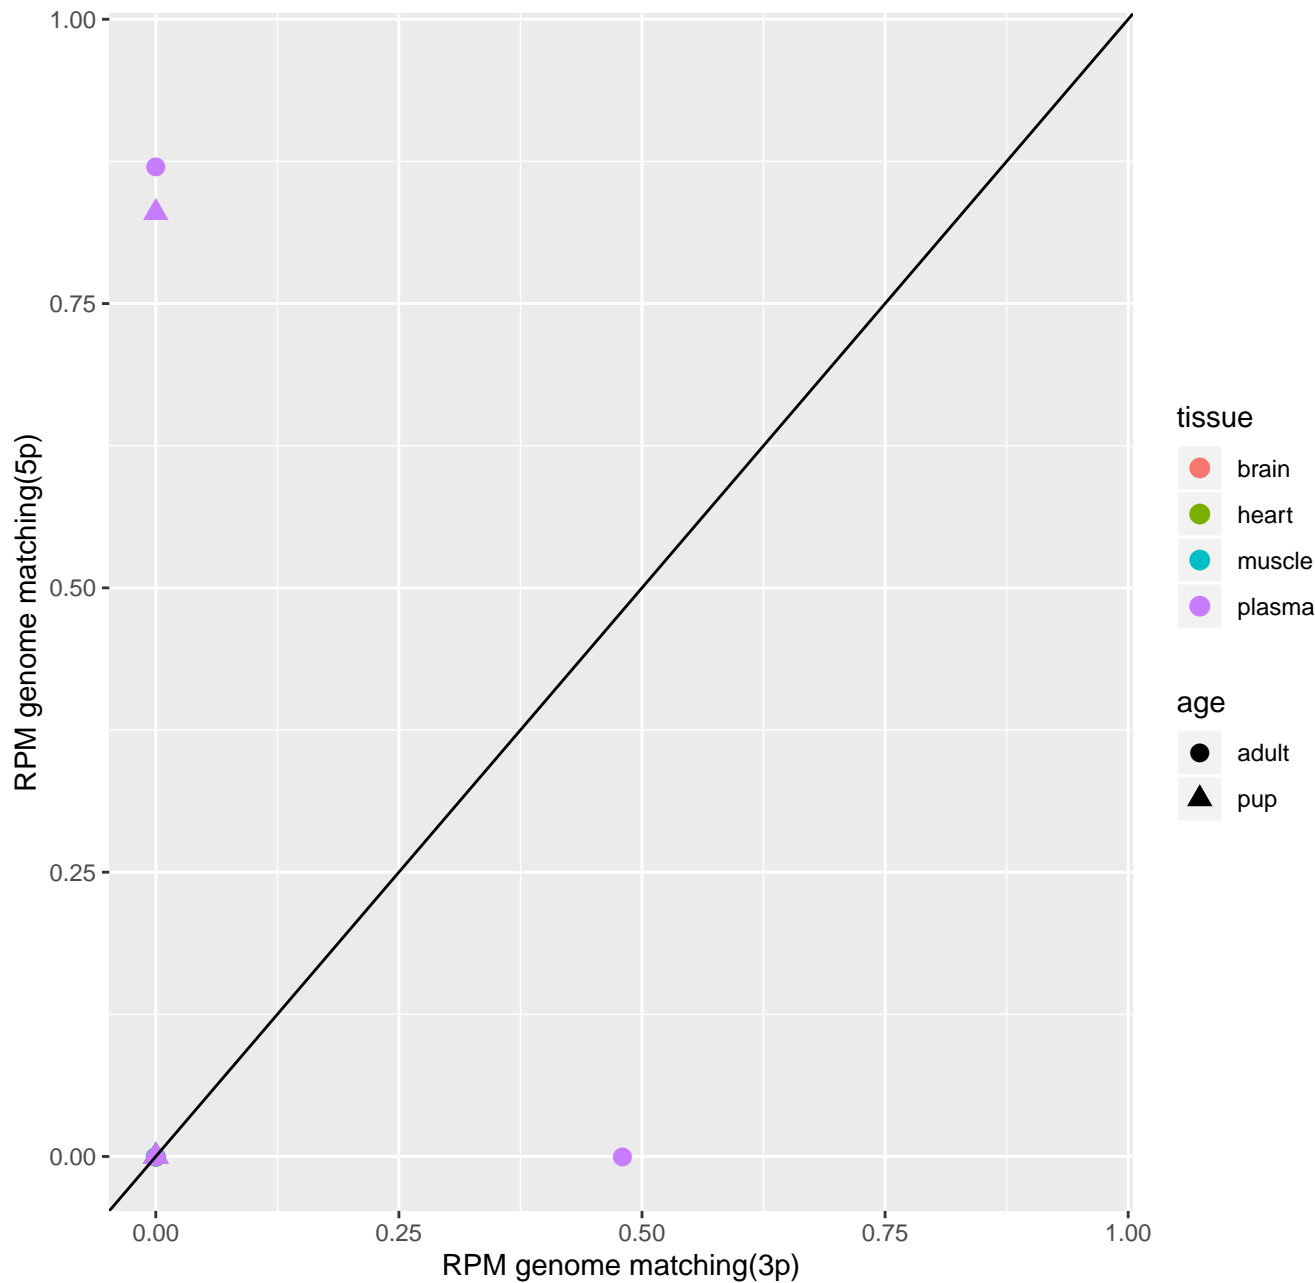

# WS\_miRDeep2\_novel\_60

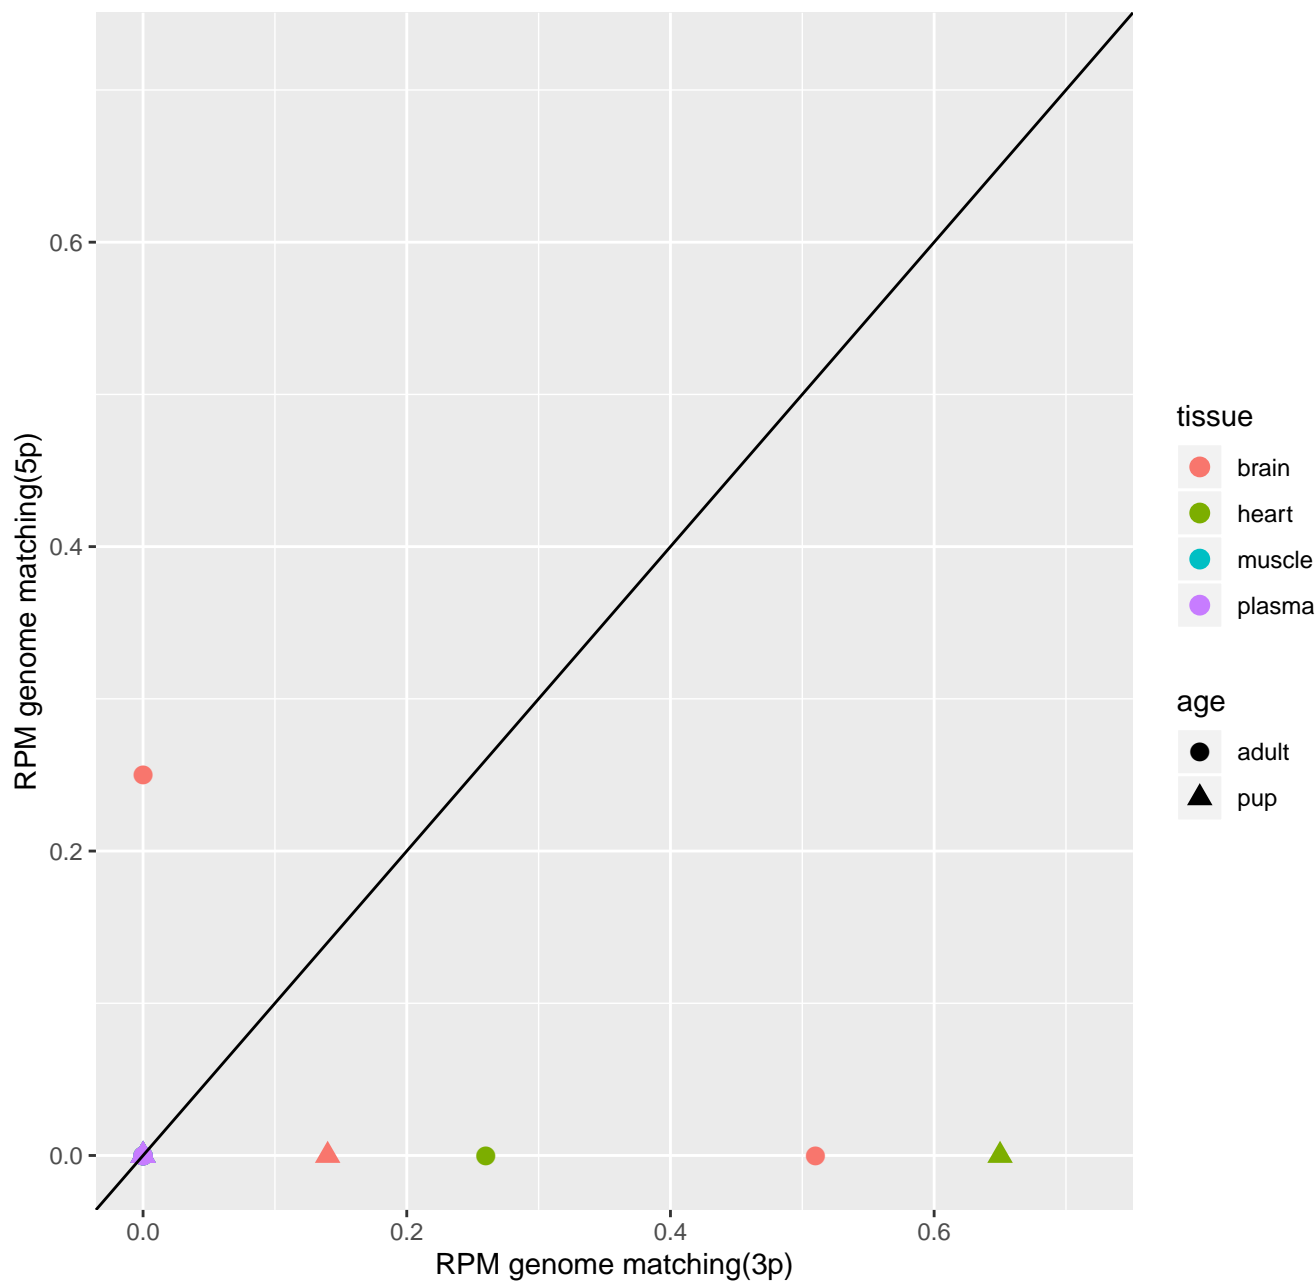

# WS\_miRDeep2\_novel\_61

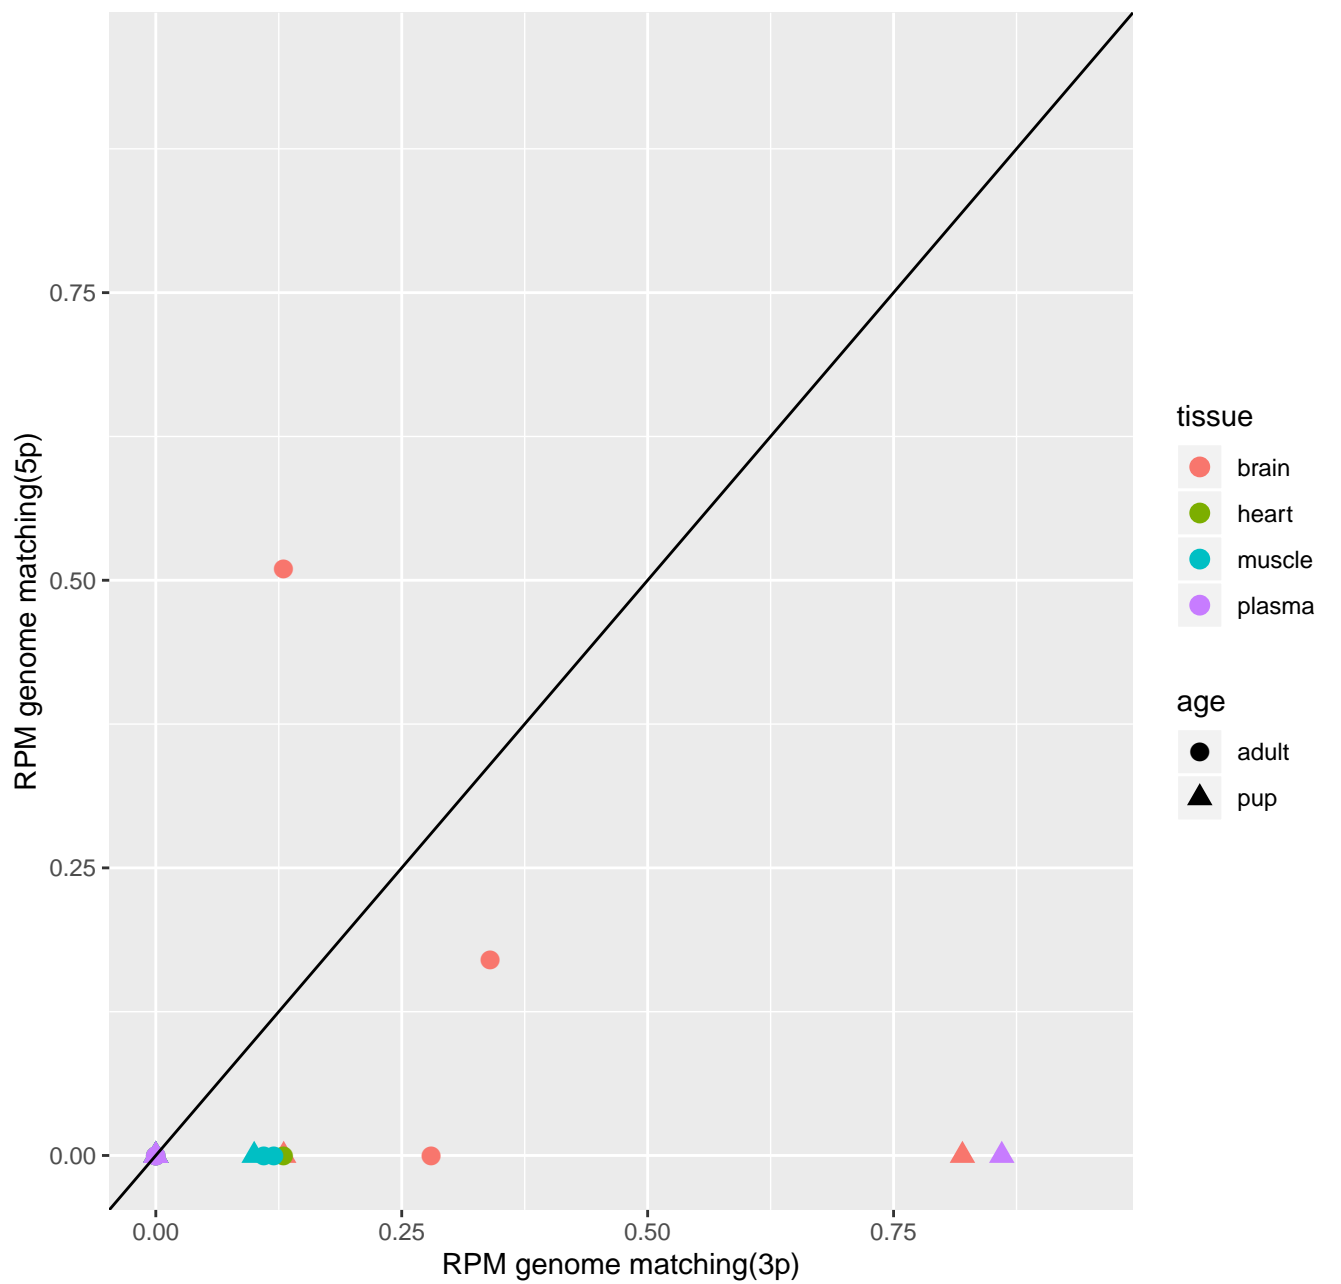

## lwe-miR-7\_miRDeep2\_loc1

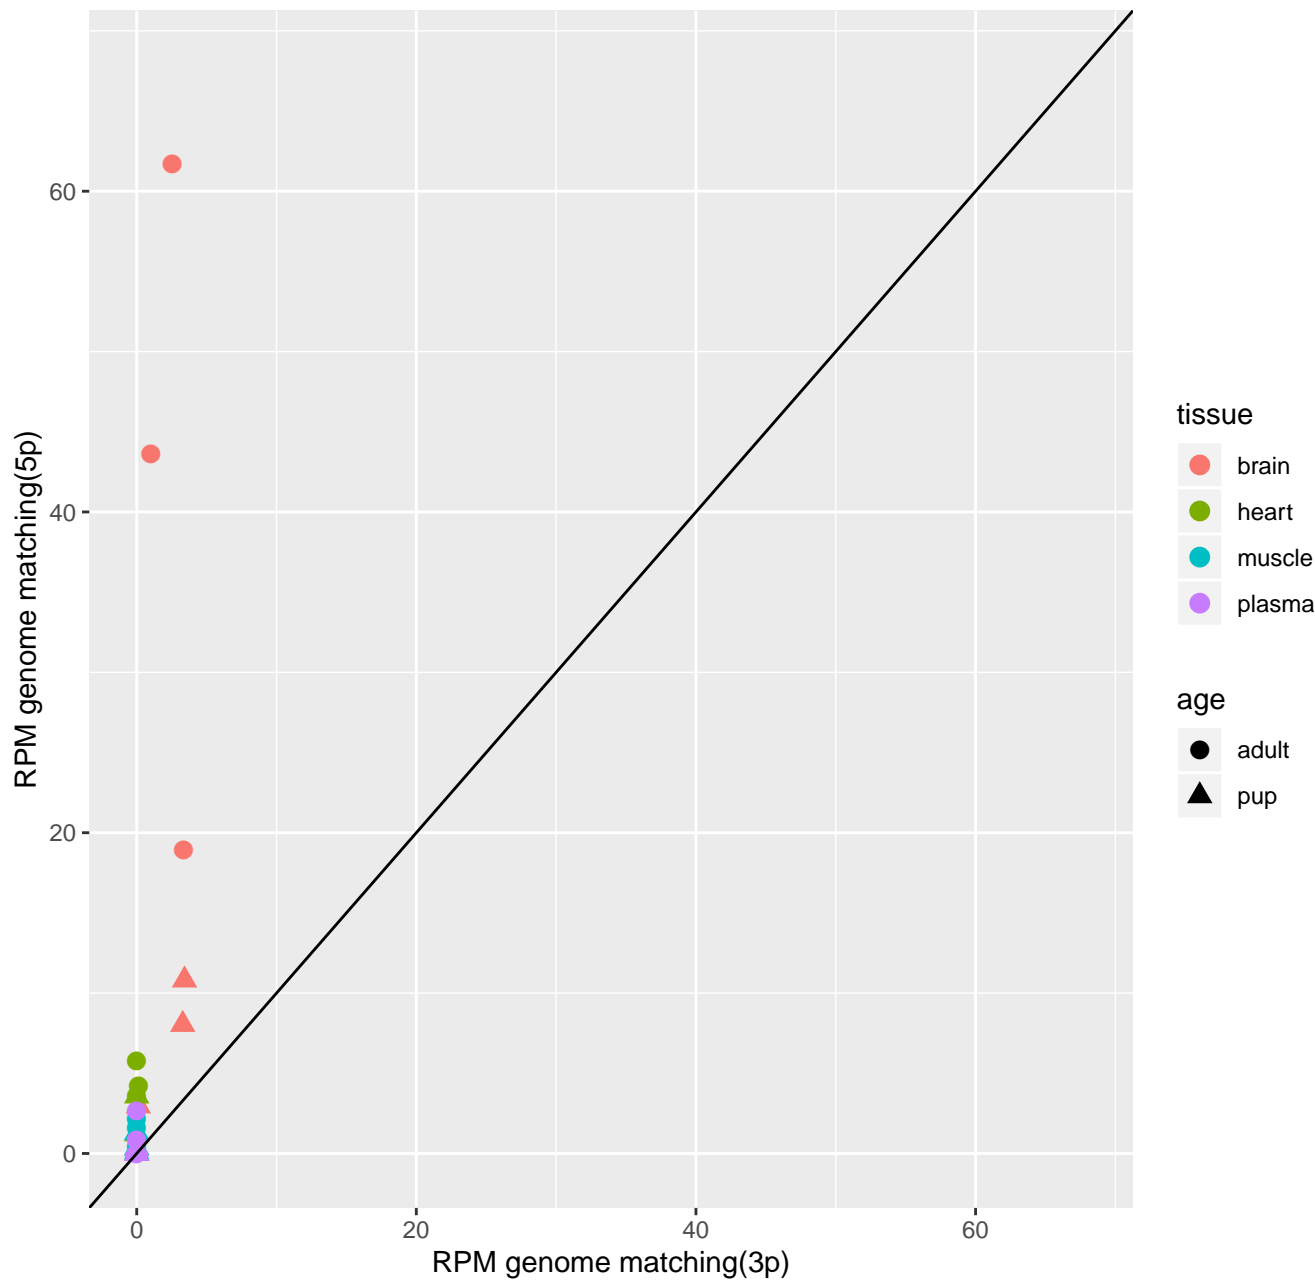



## WS\_miRDeep2\_novel\_62

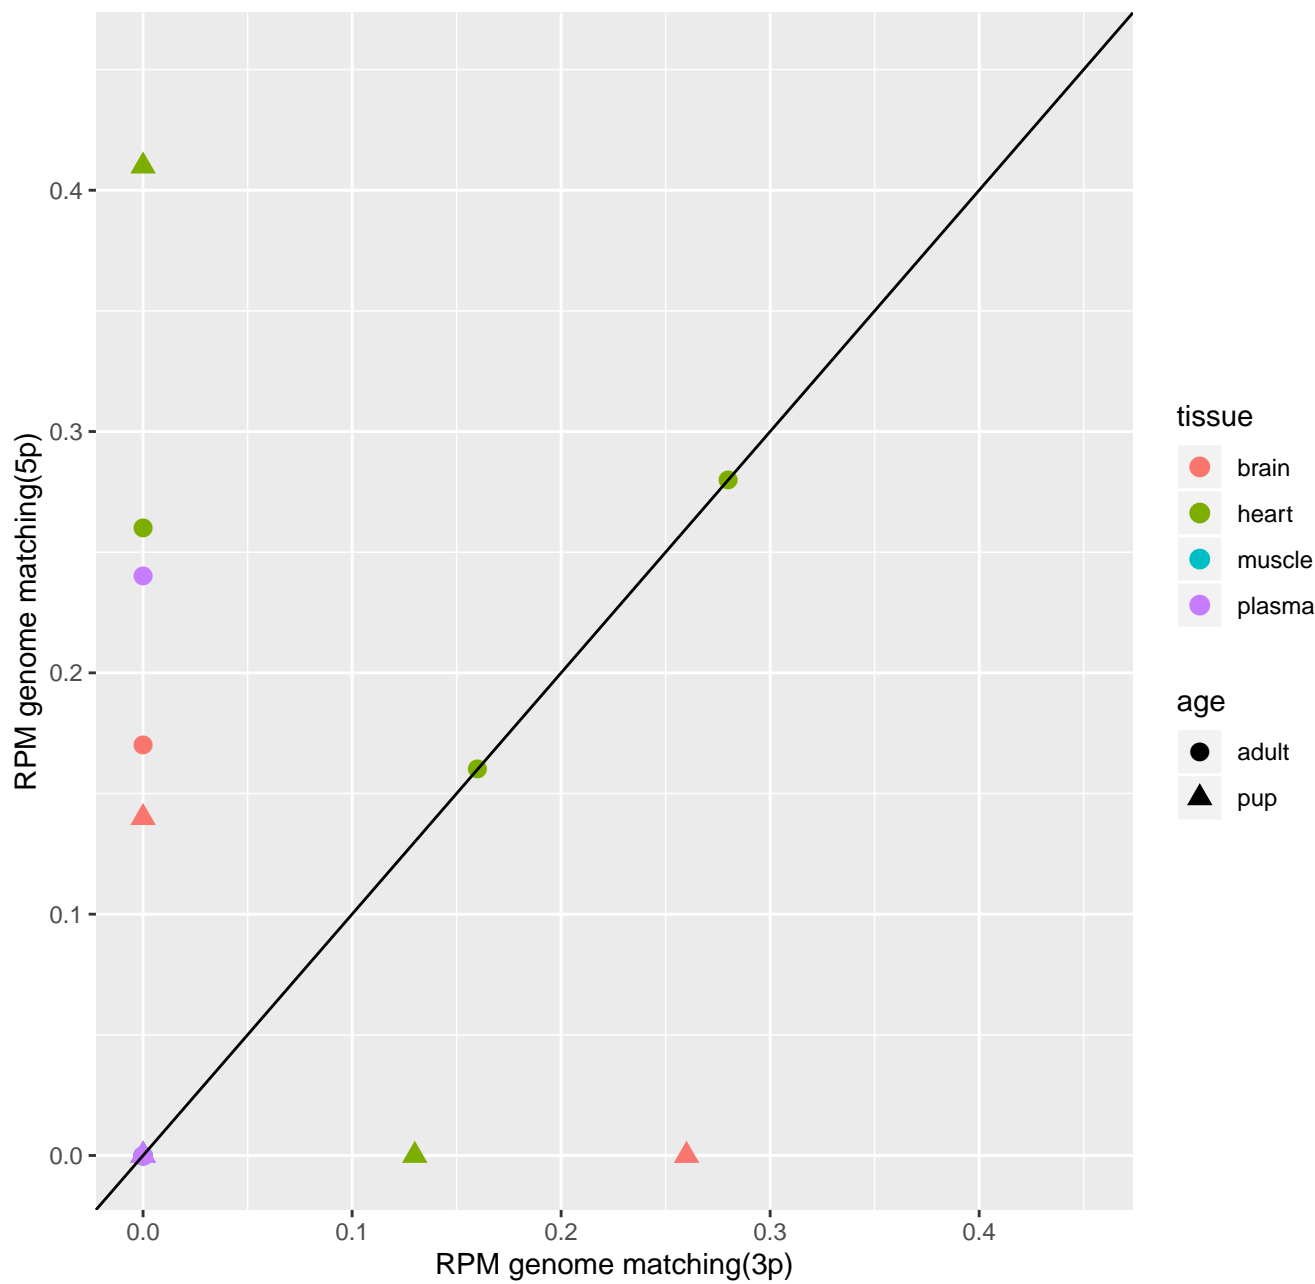

# WS\_miRDeep2\_novel\_63

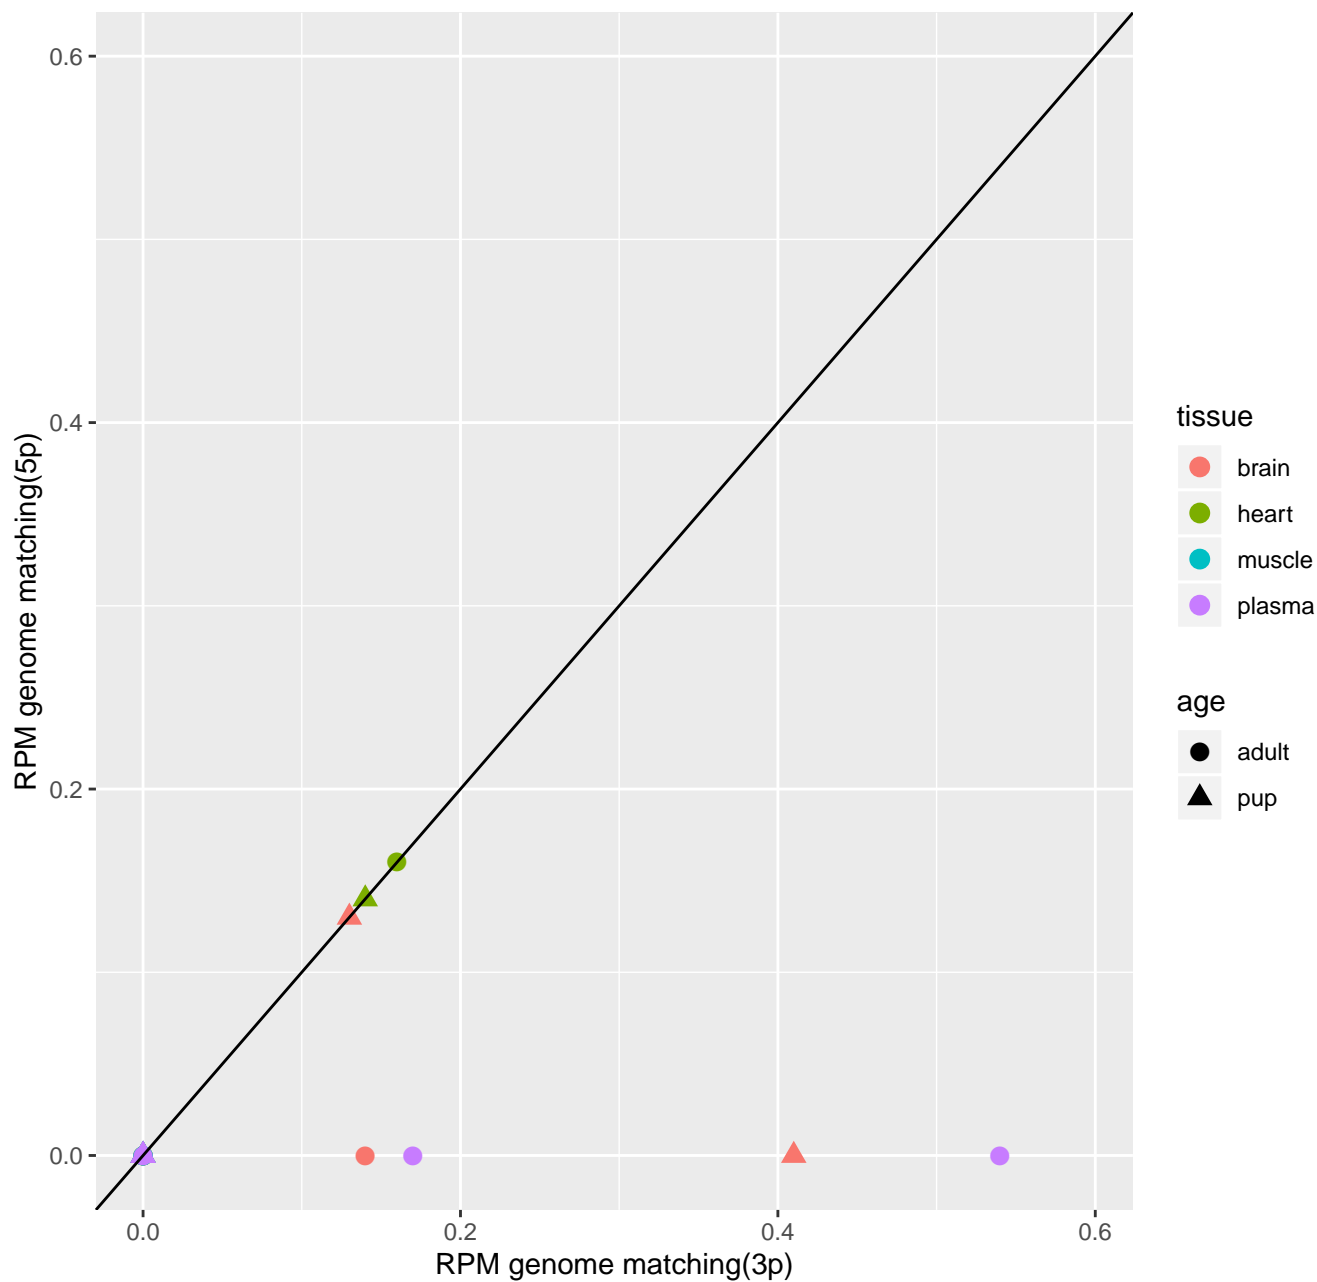

# WS\_miRDeep2\_novel\_64

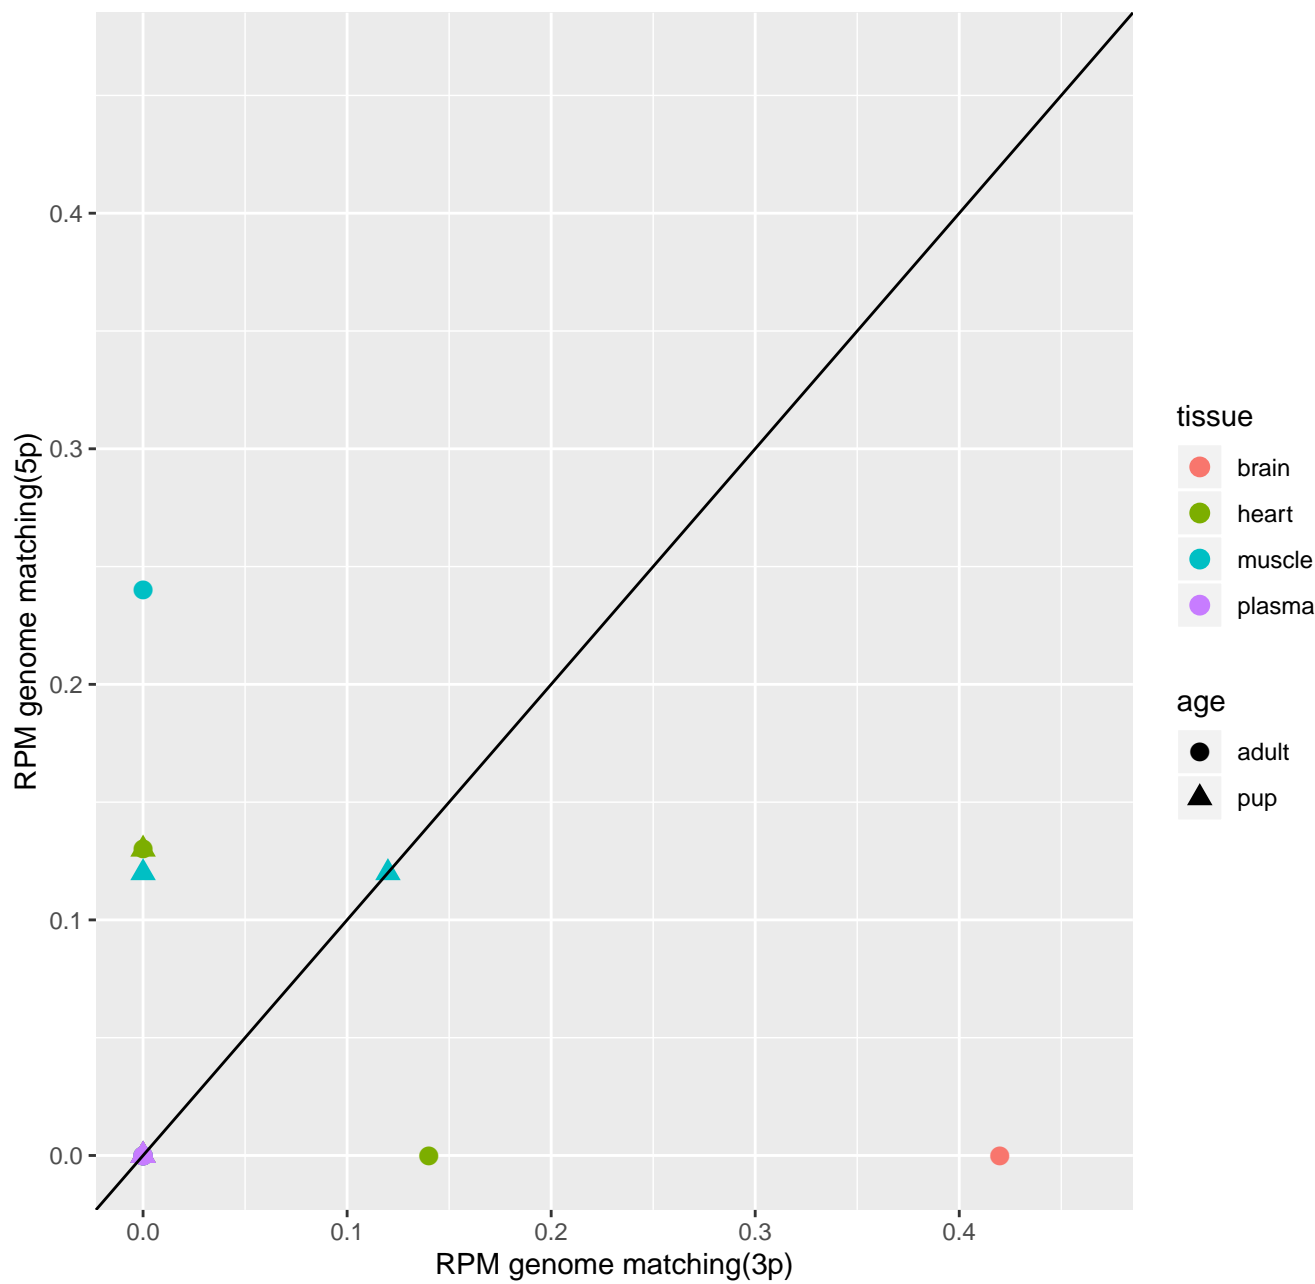

# WS\_miRDeep2\_novel\_65

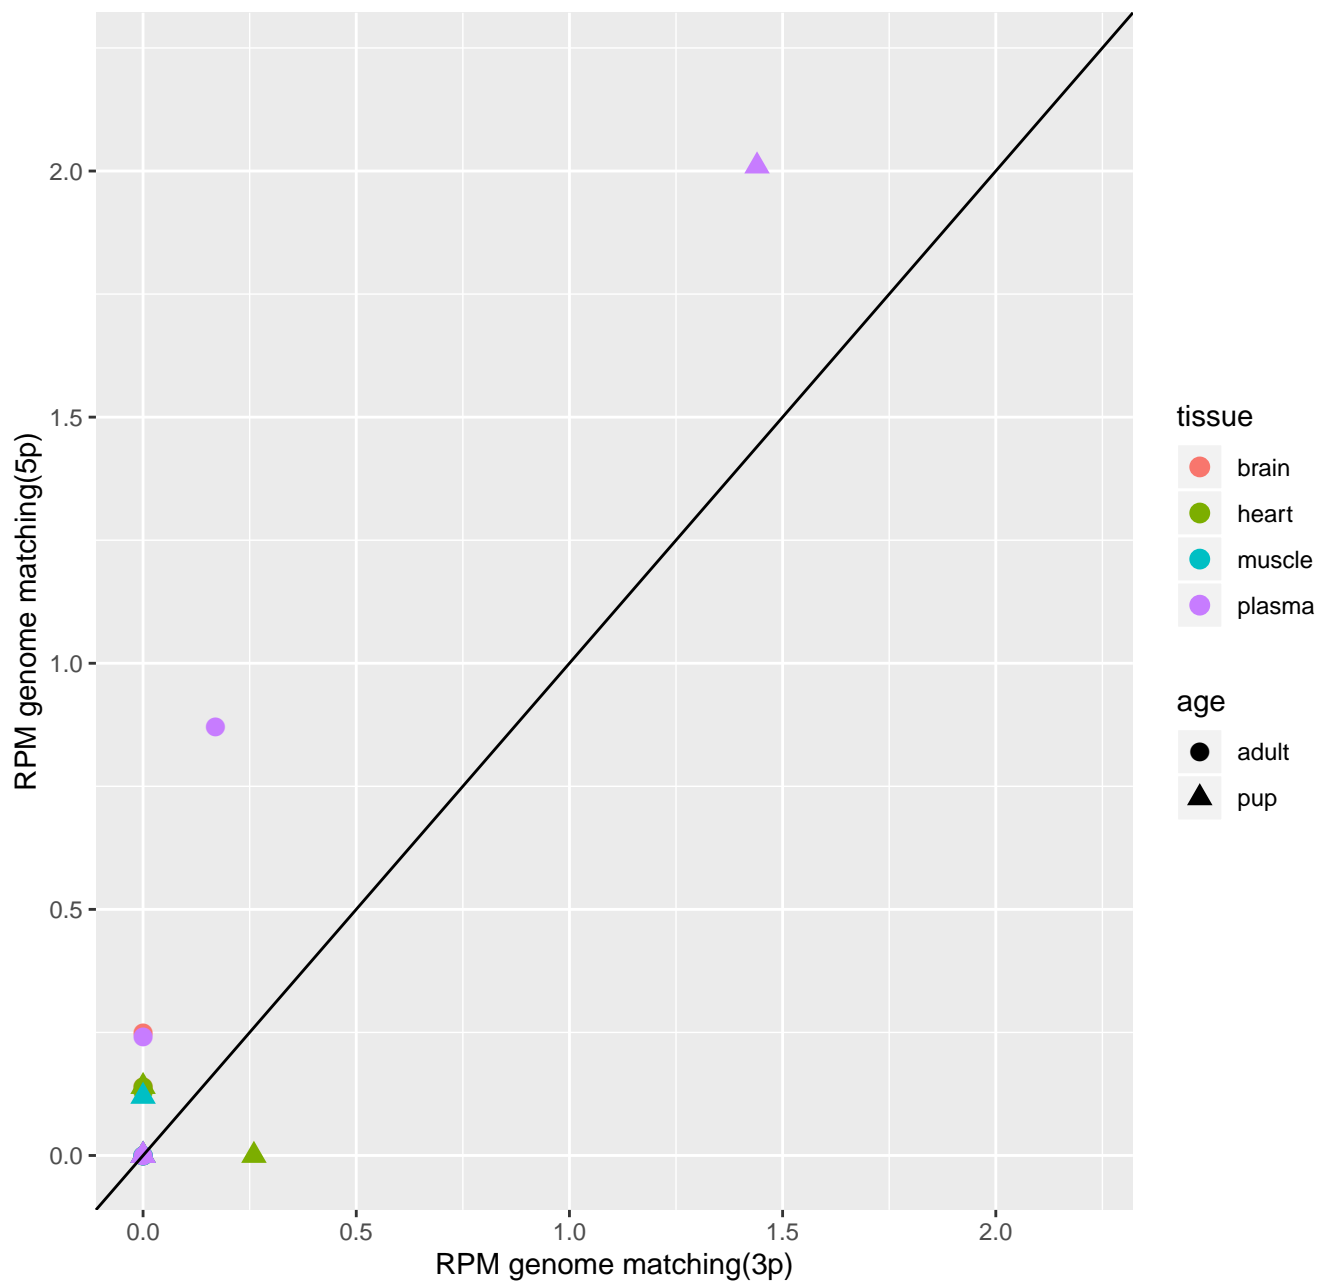

# WS\_miRDeep2\_novel\_66

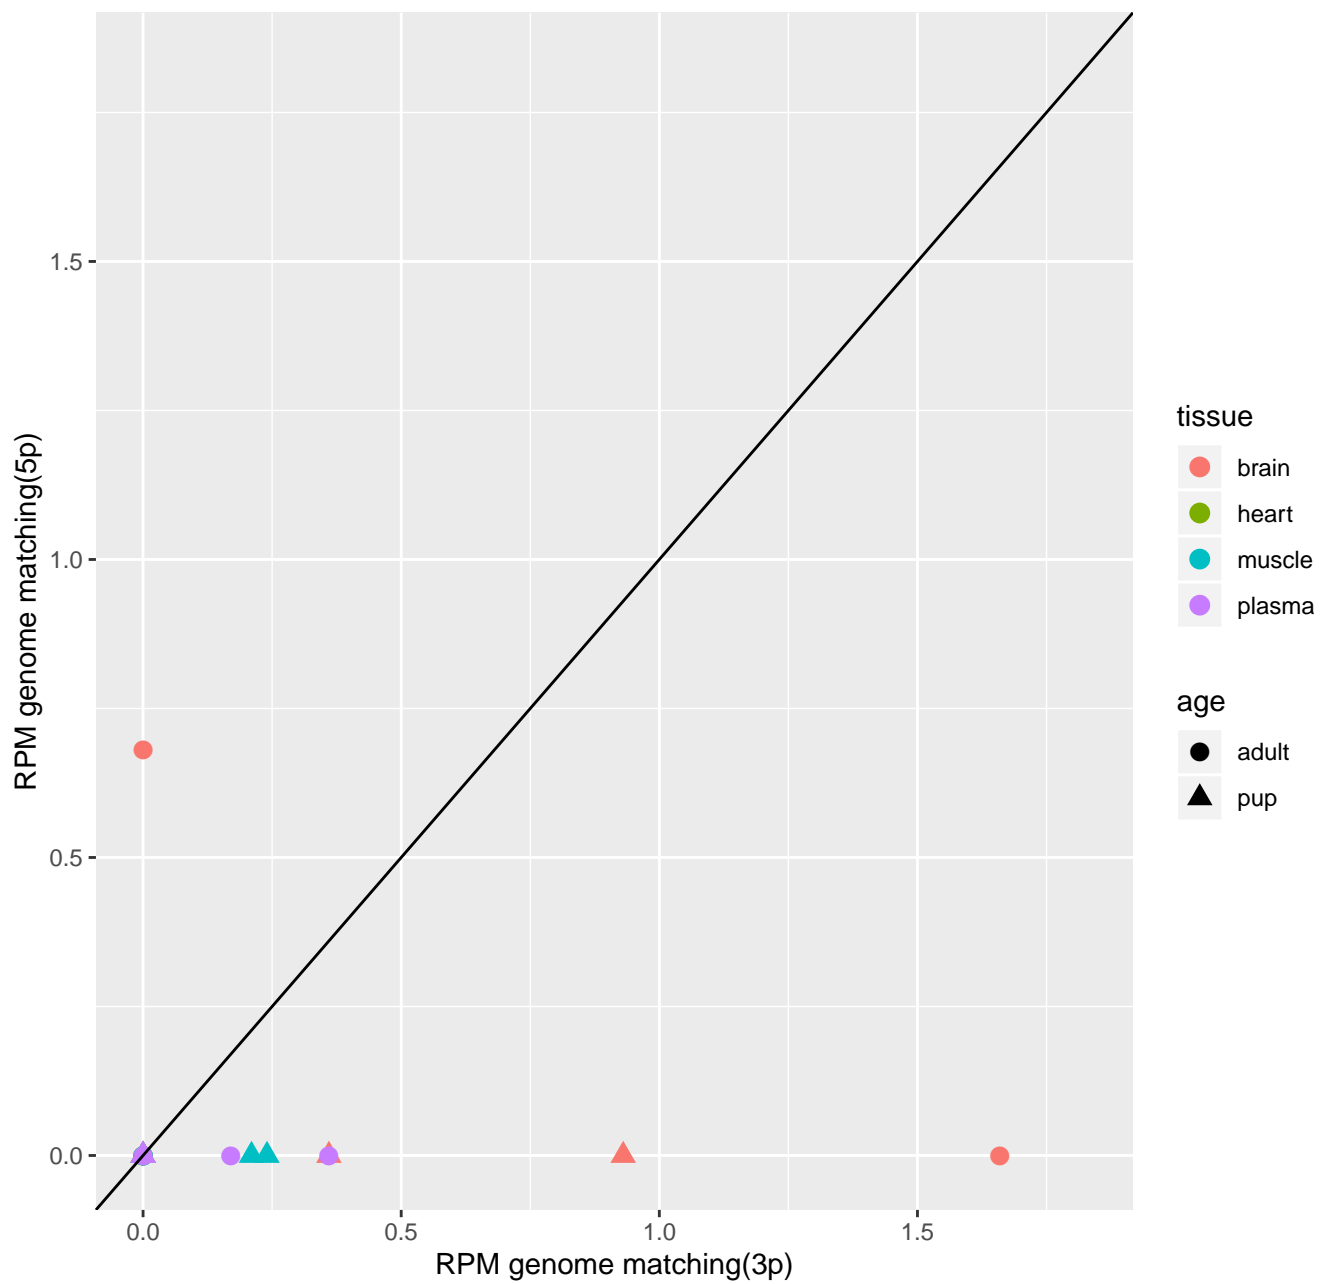



# WS\_miRDeep2\_novel\_67

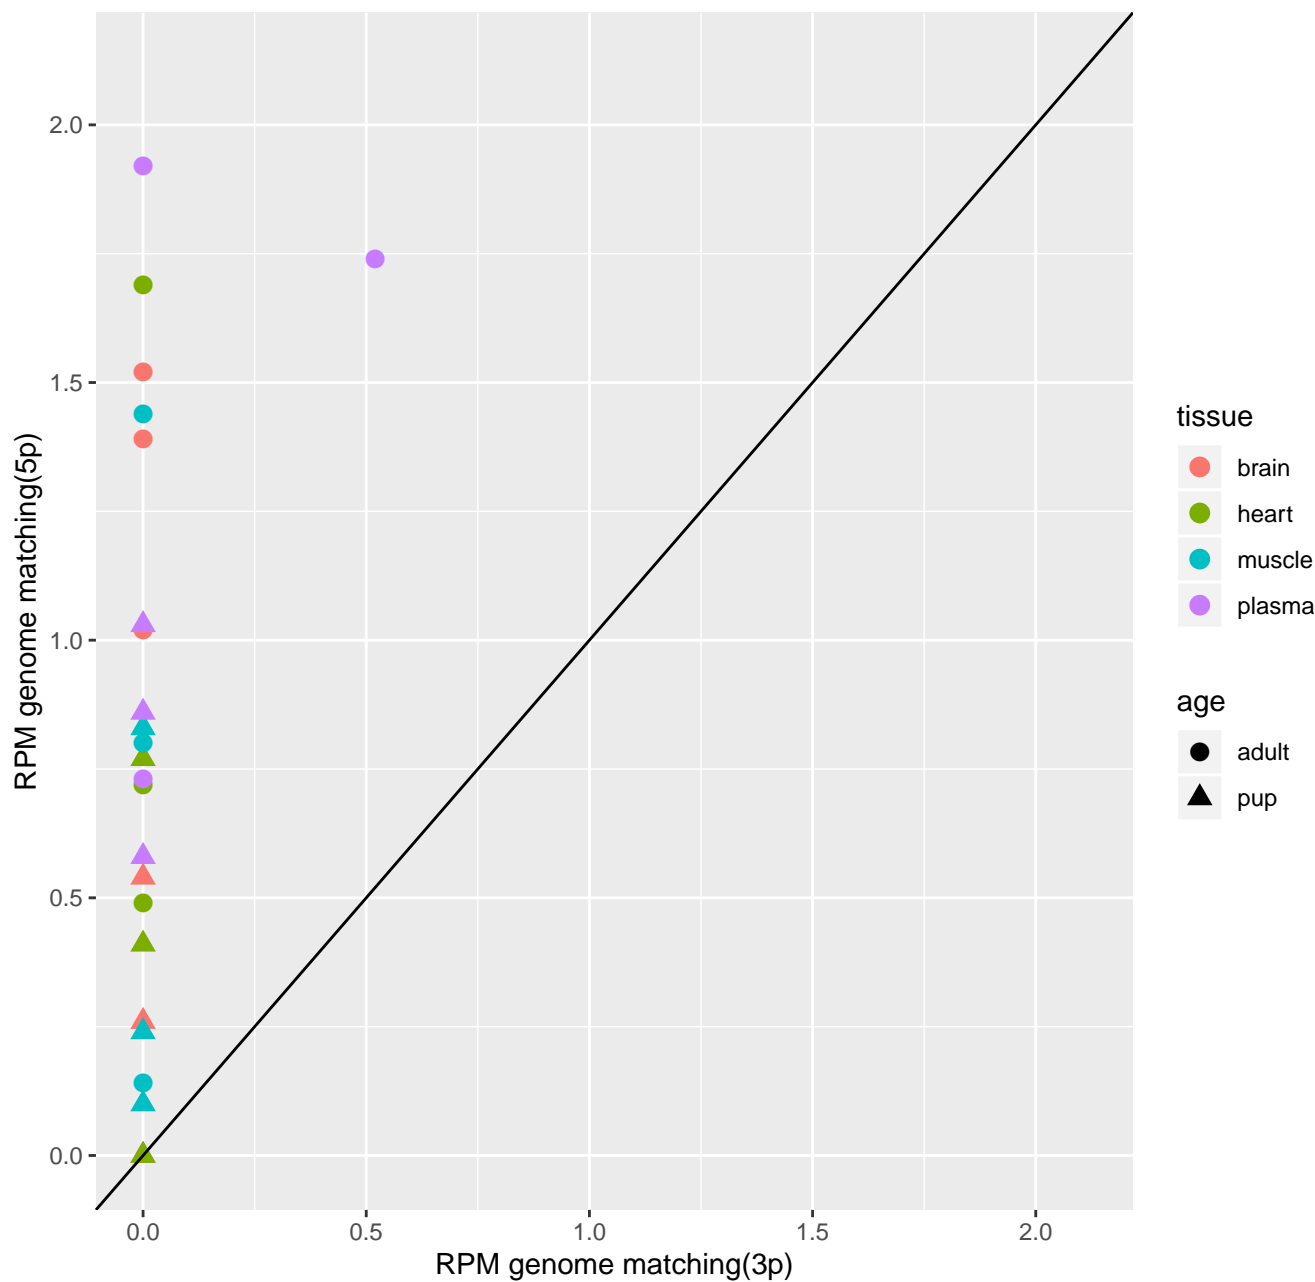

WS\_miRDeep2\_novel\_68

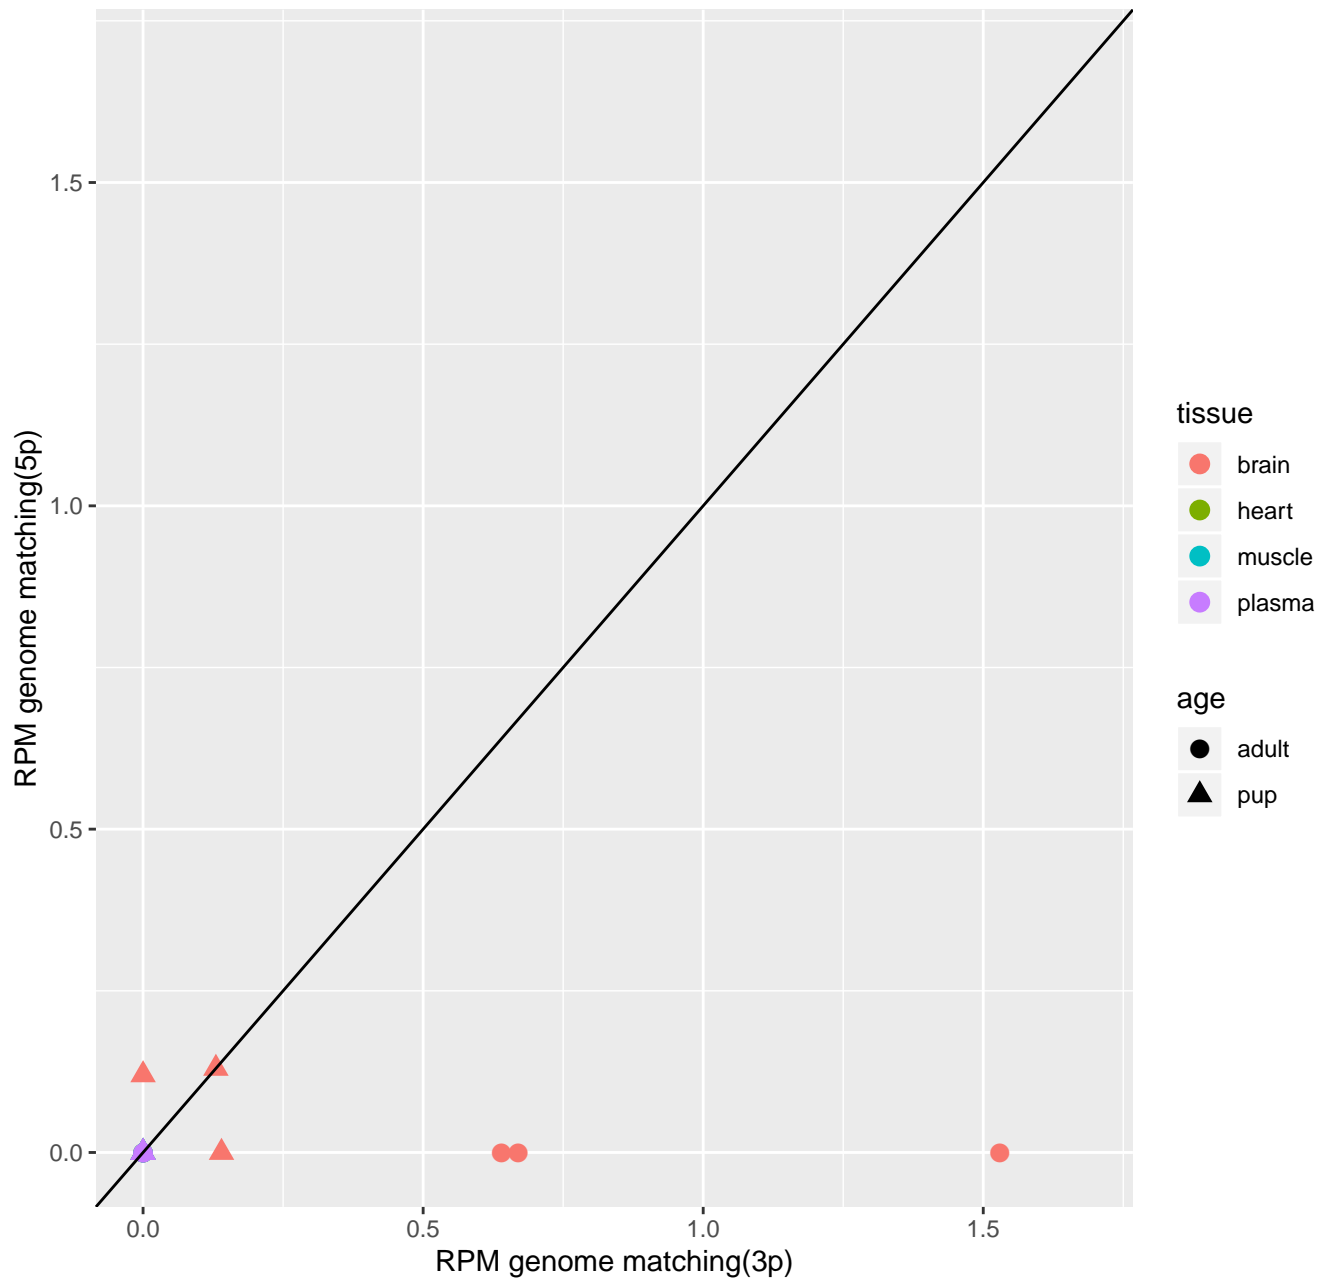



## lwe-miR-6529\_miRDeep2\_loc1

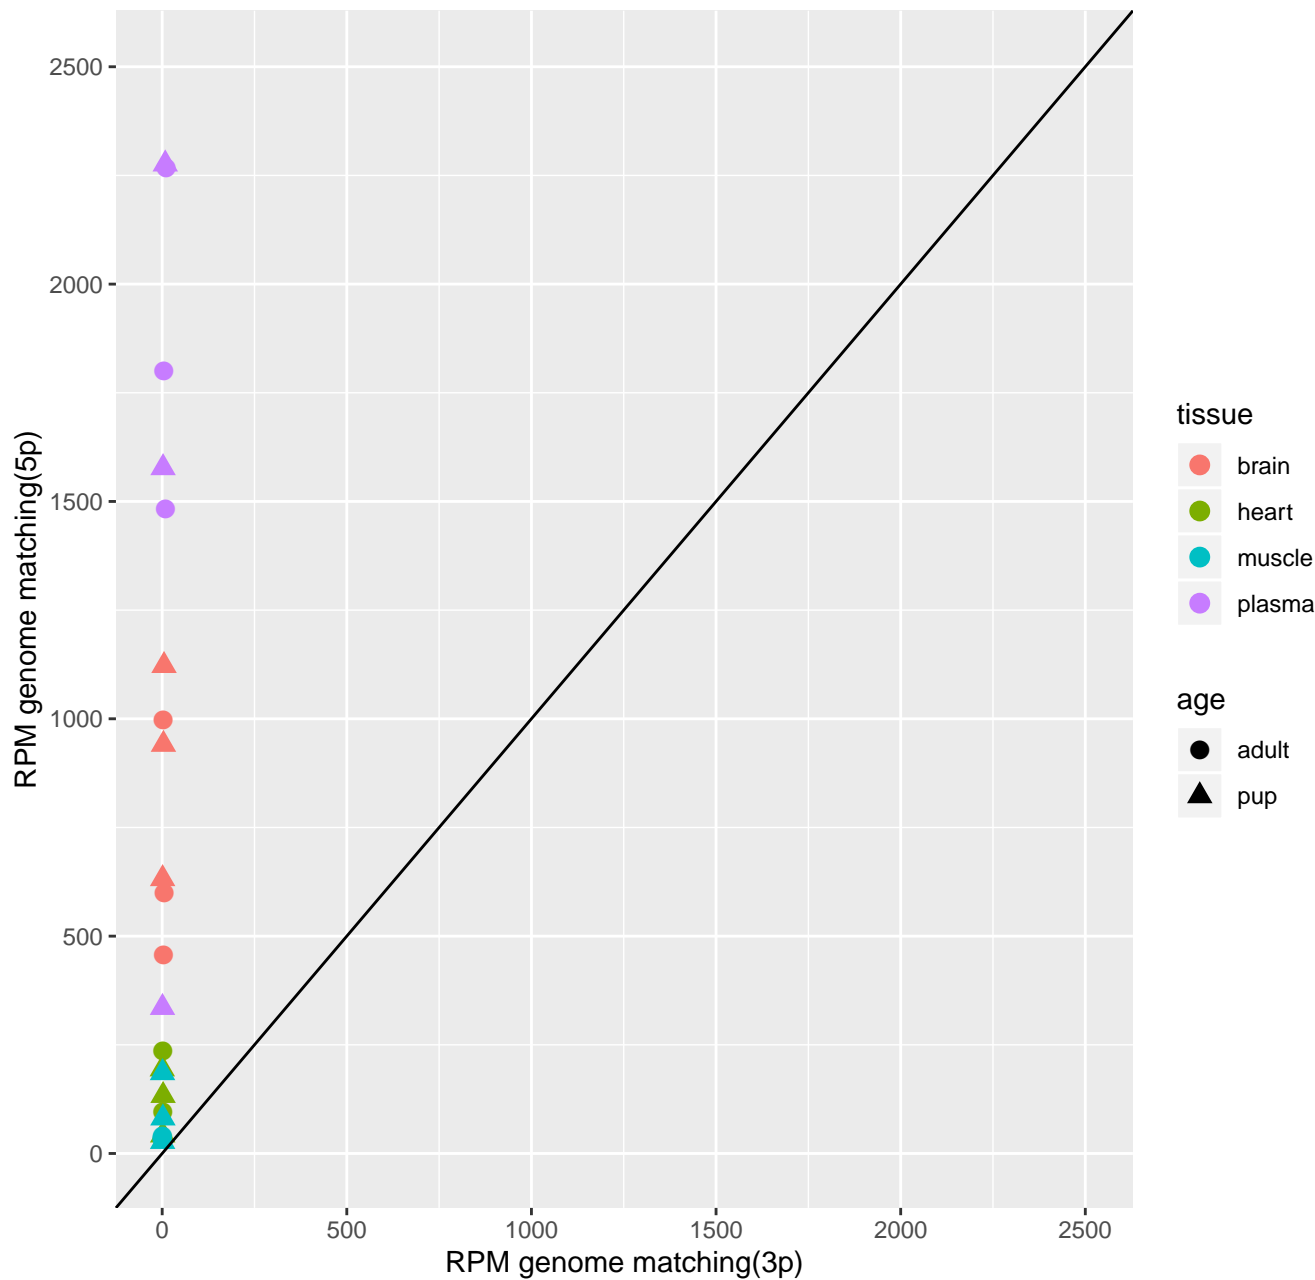

## lwe-miR-3200\_loc1

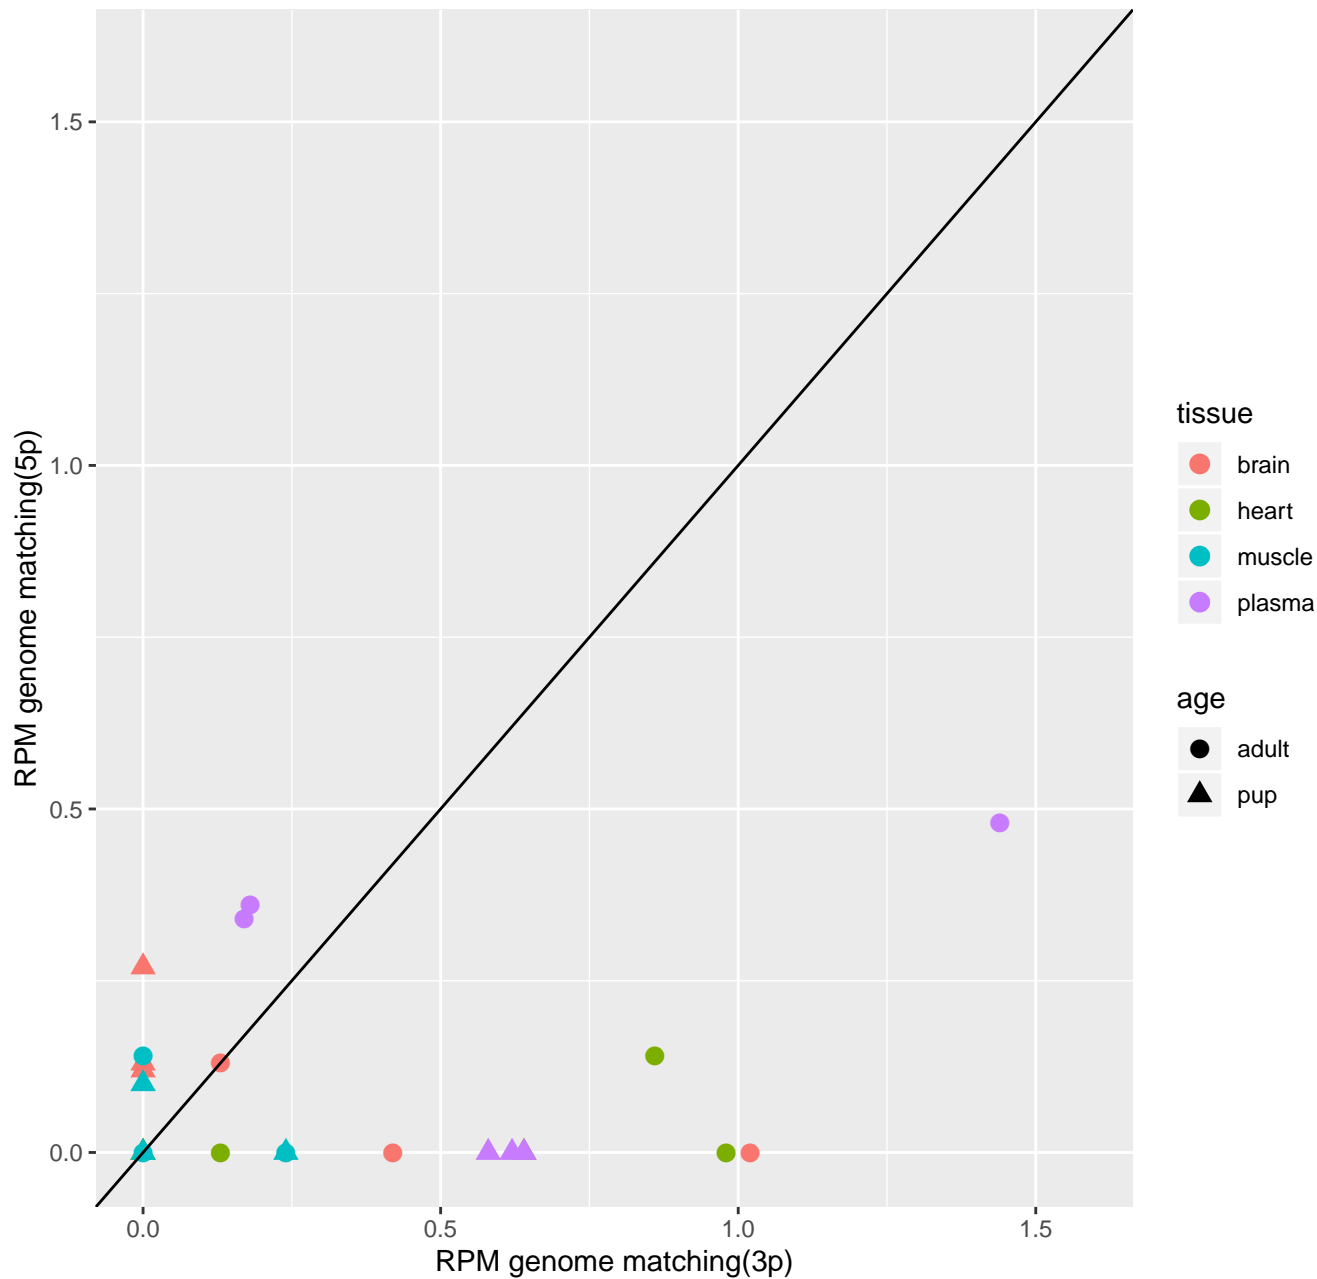

## lwe-miR-217\_miRDeep2\_loc1

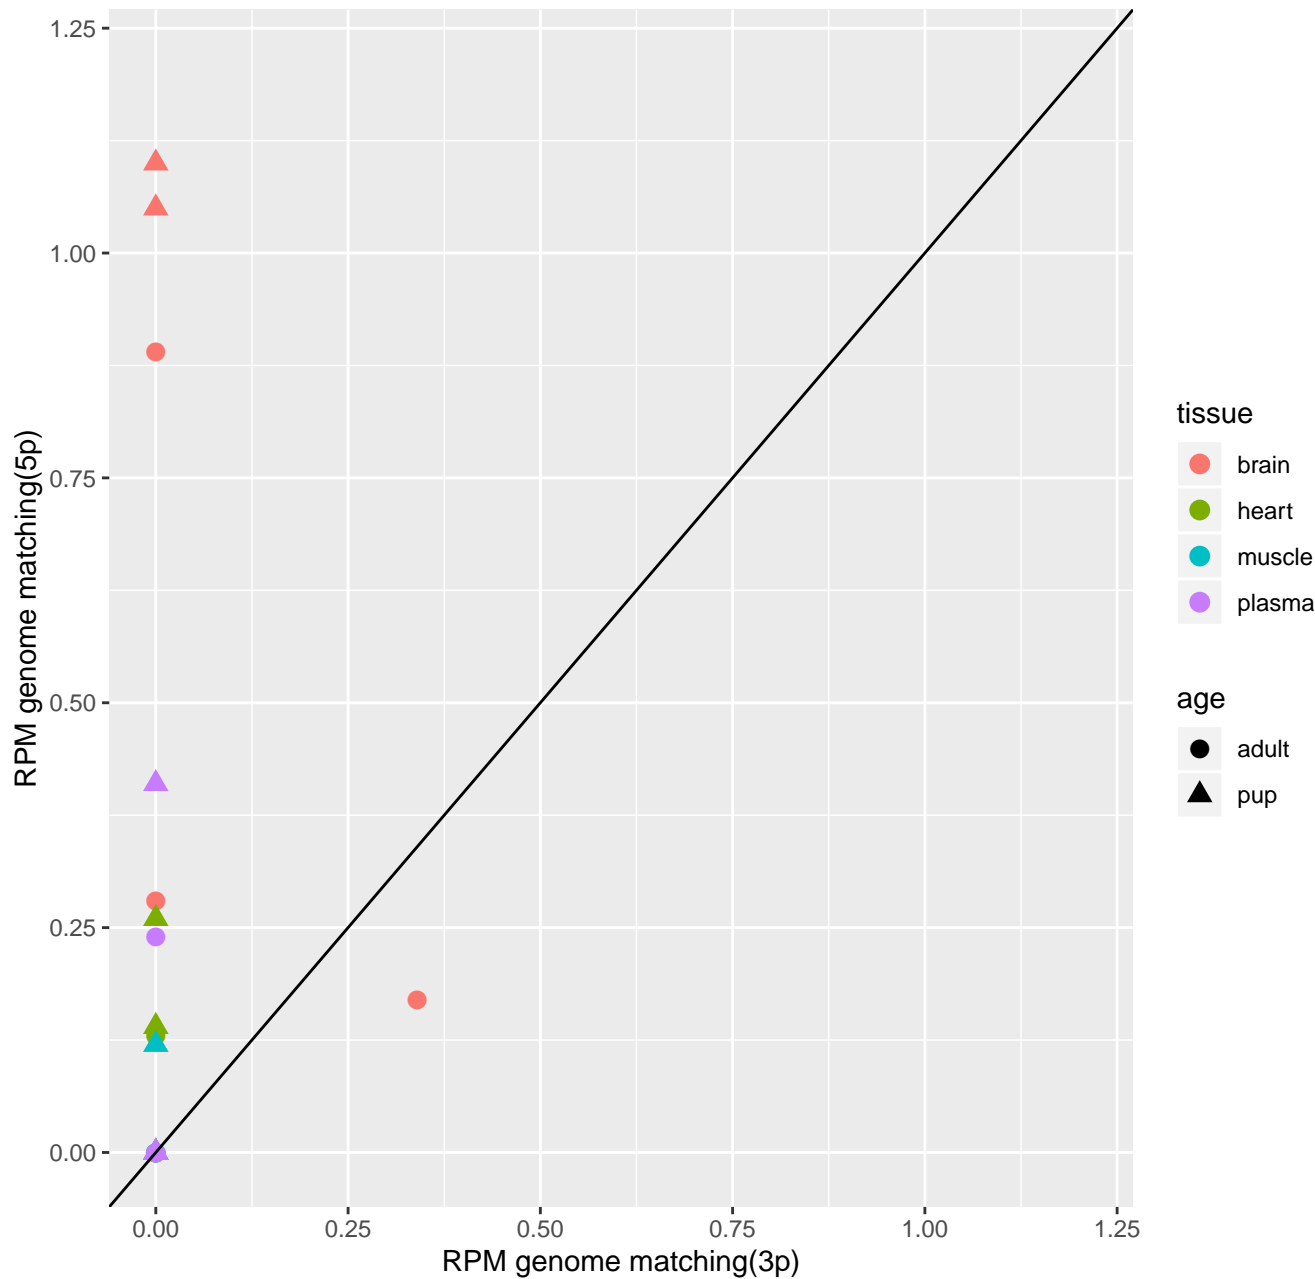

## lwe-miR-222\_miRDeep2\_loc1

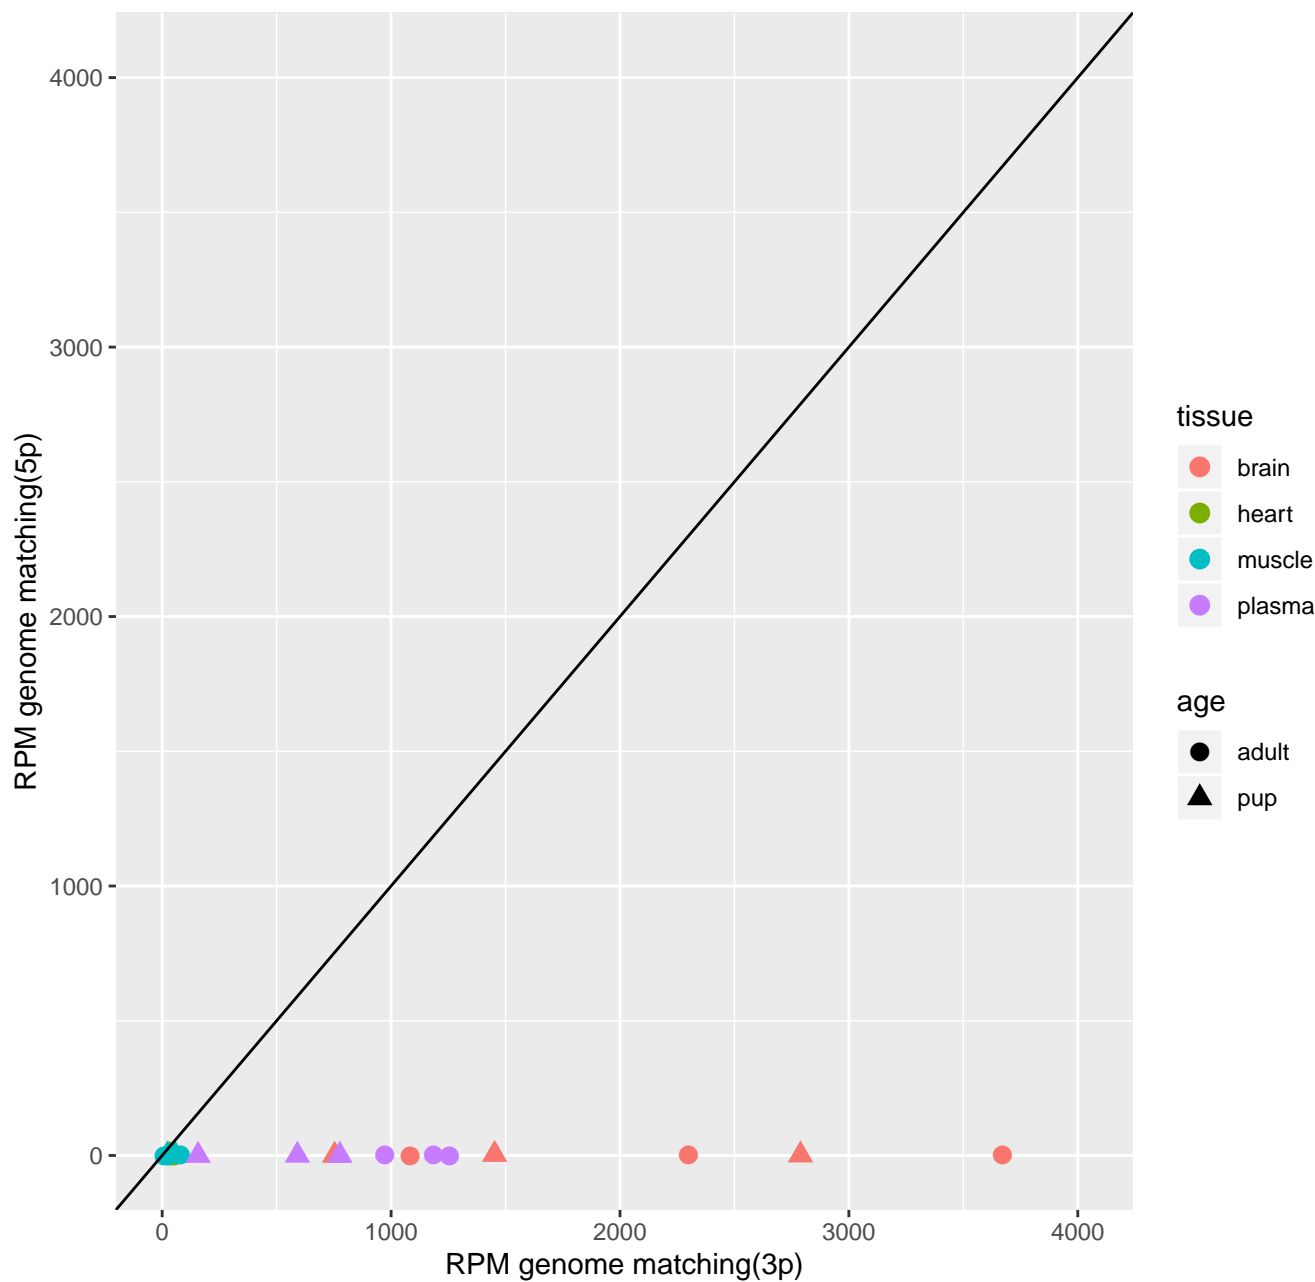

# WS\_miRDeep2\_novel\_70

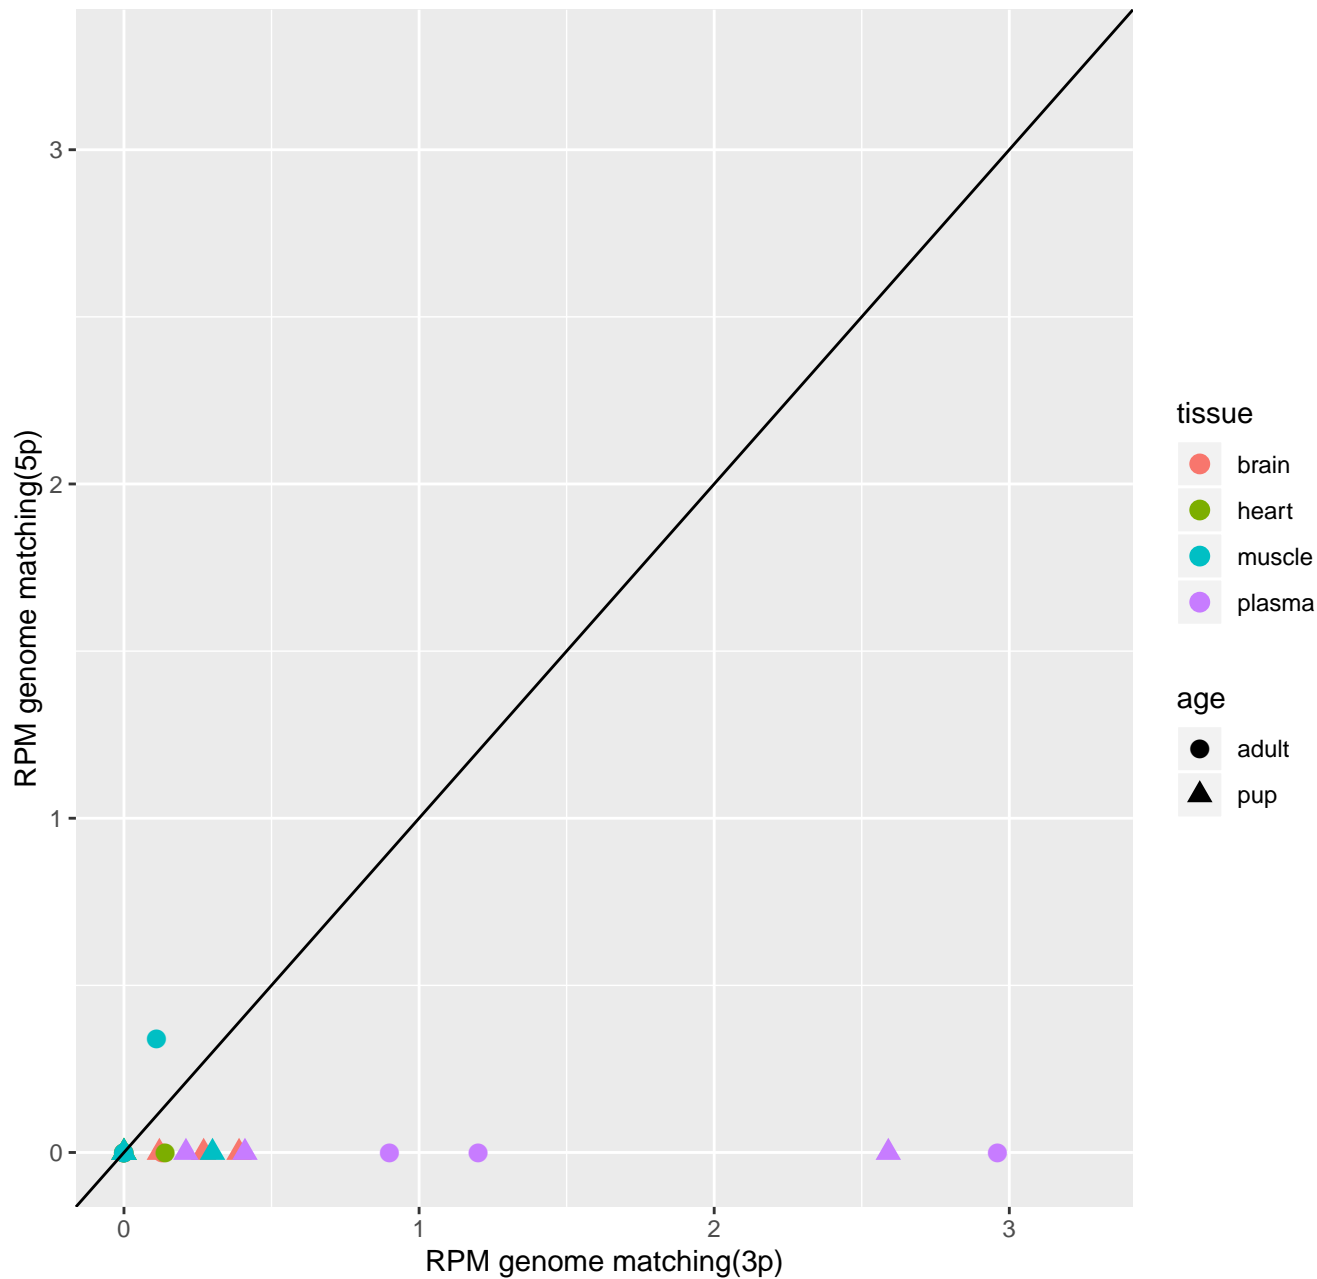

# WS\_miRDeep2\_novel\_71

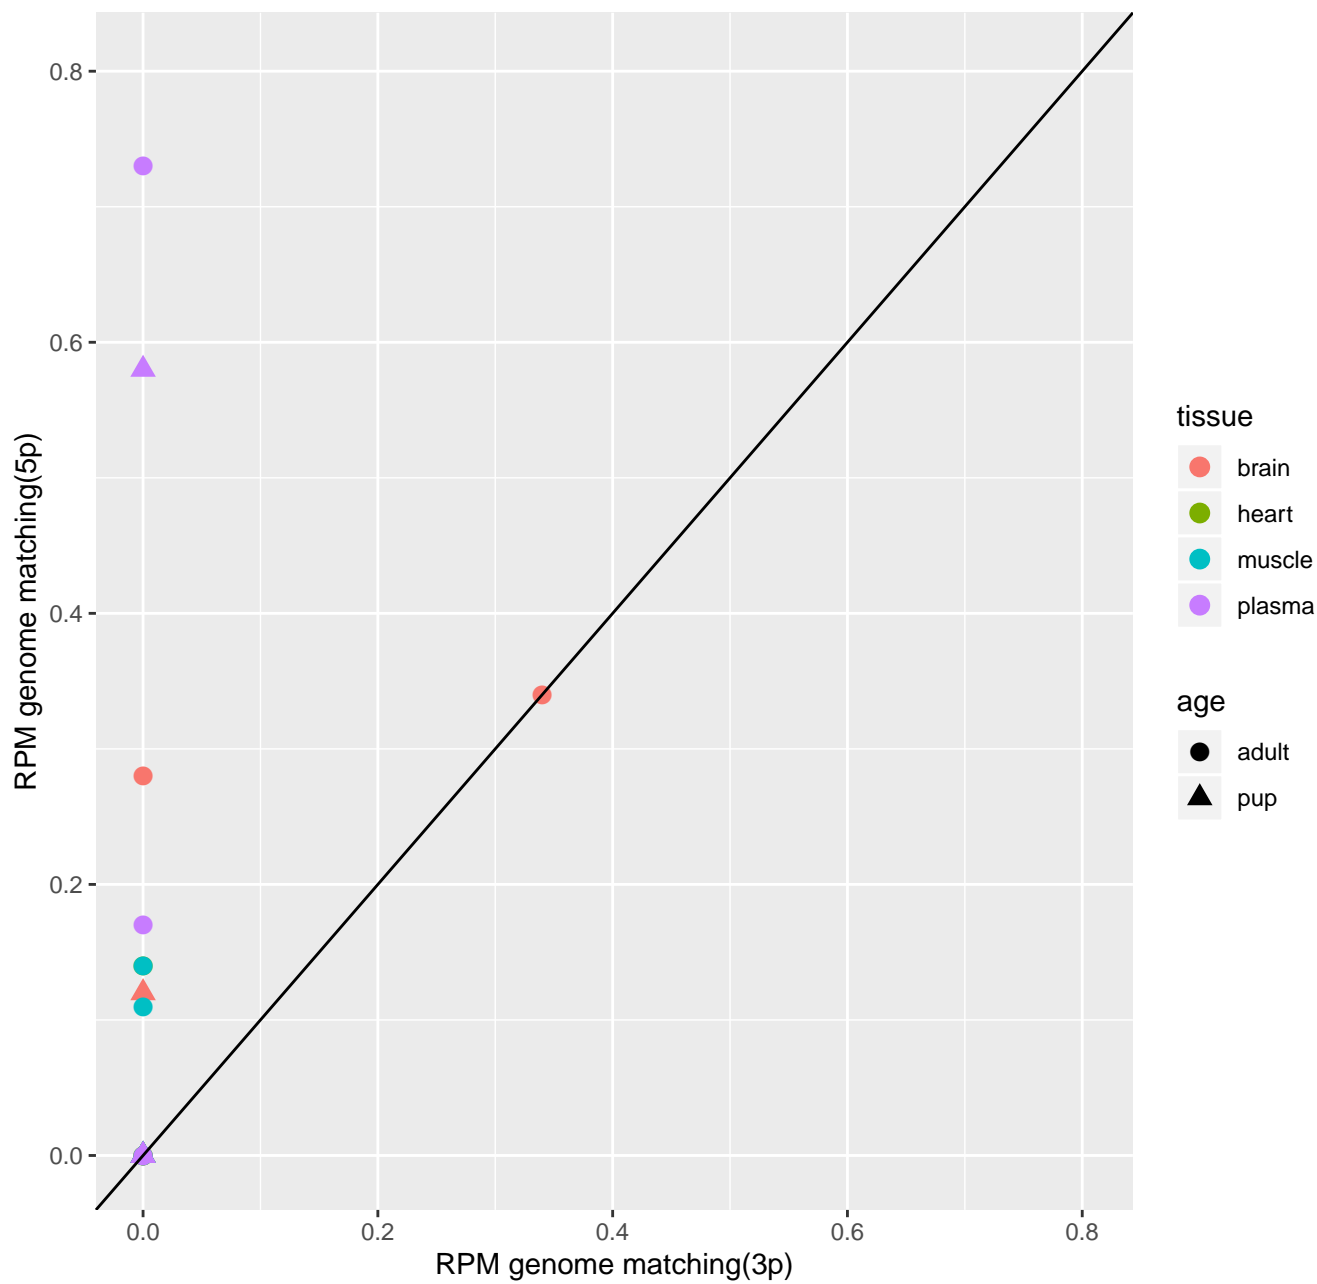

# WS\_miRDeep2\_novel\_72

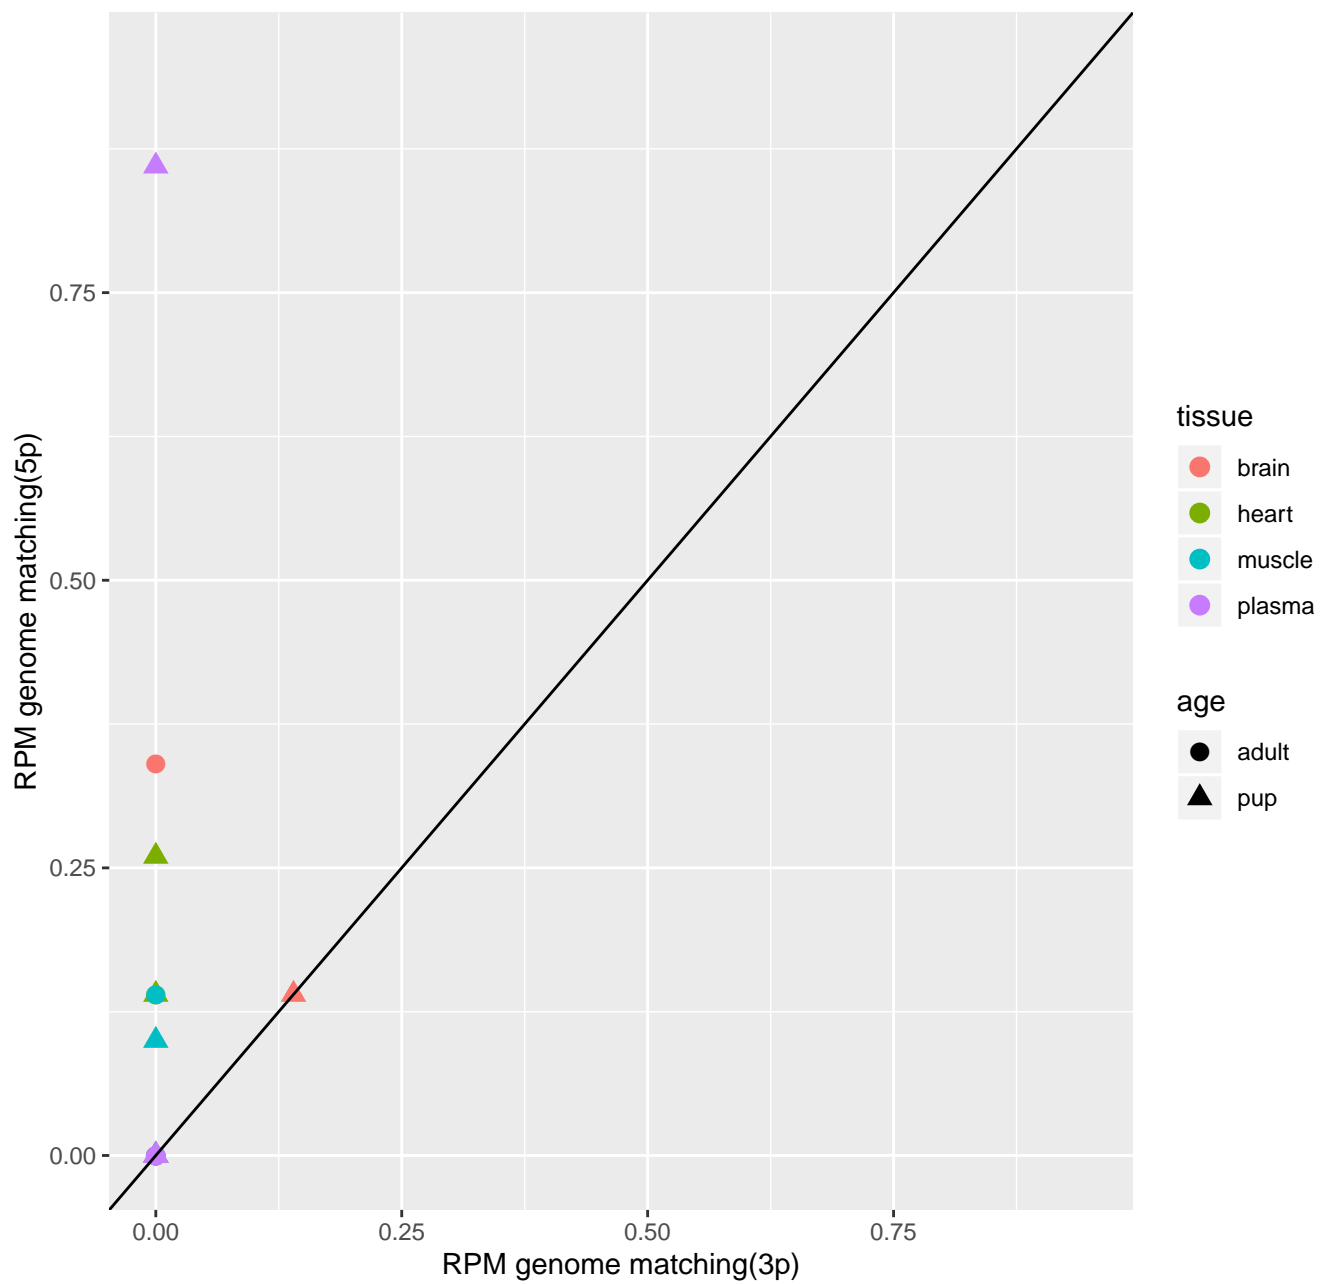

## lwe-miR-362\_miRDeep2\_loc1

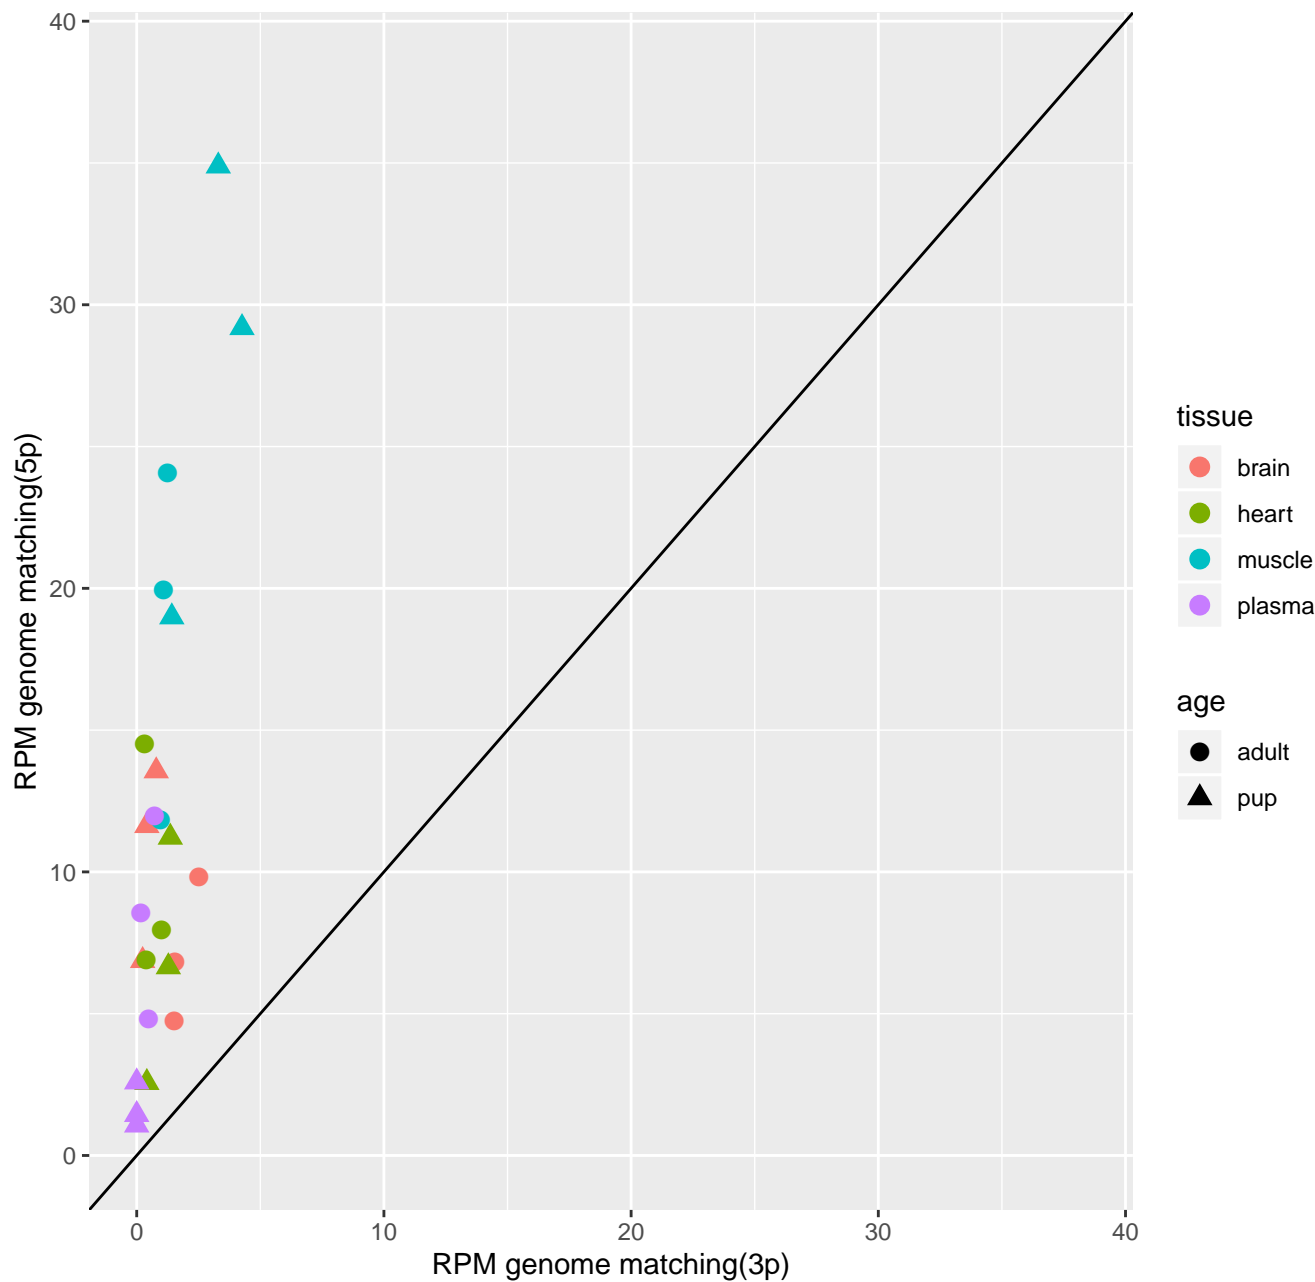





WS\_miRDeep2\_novel\_74

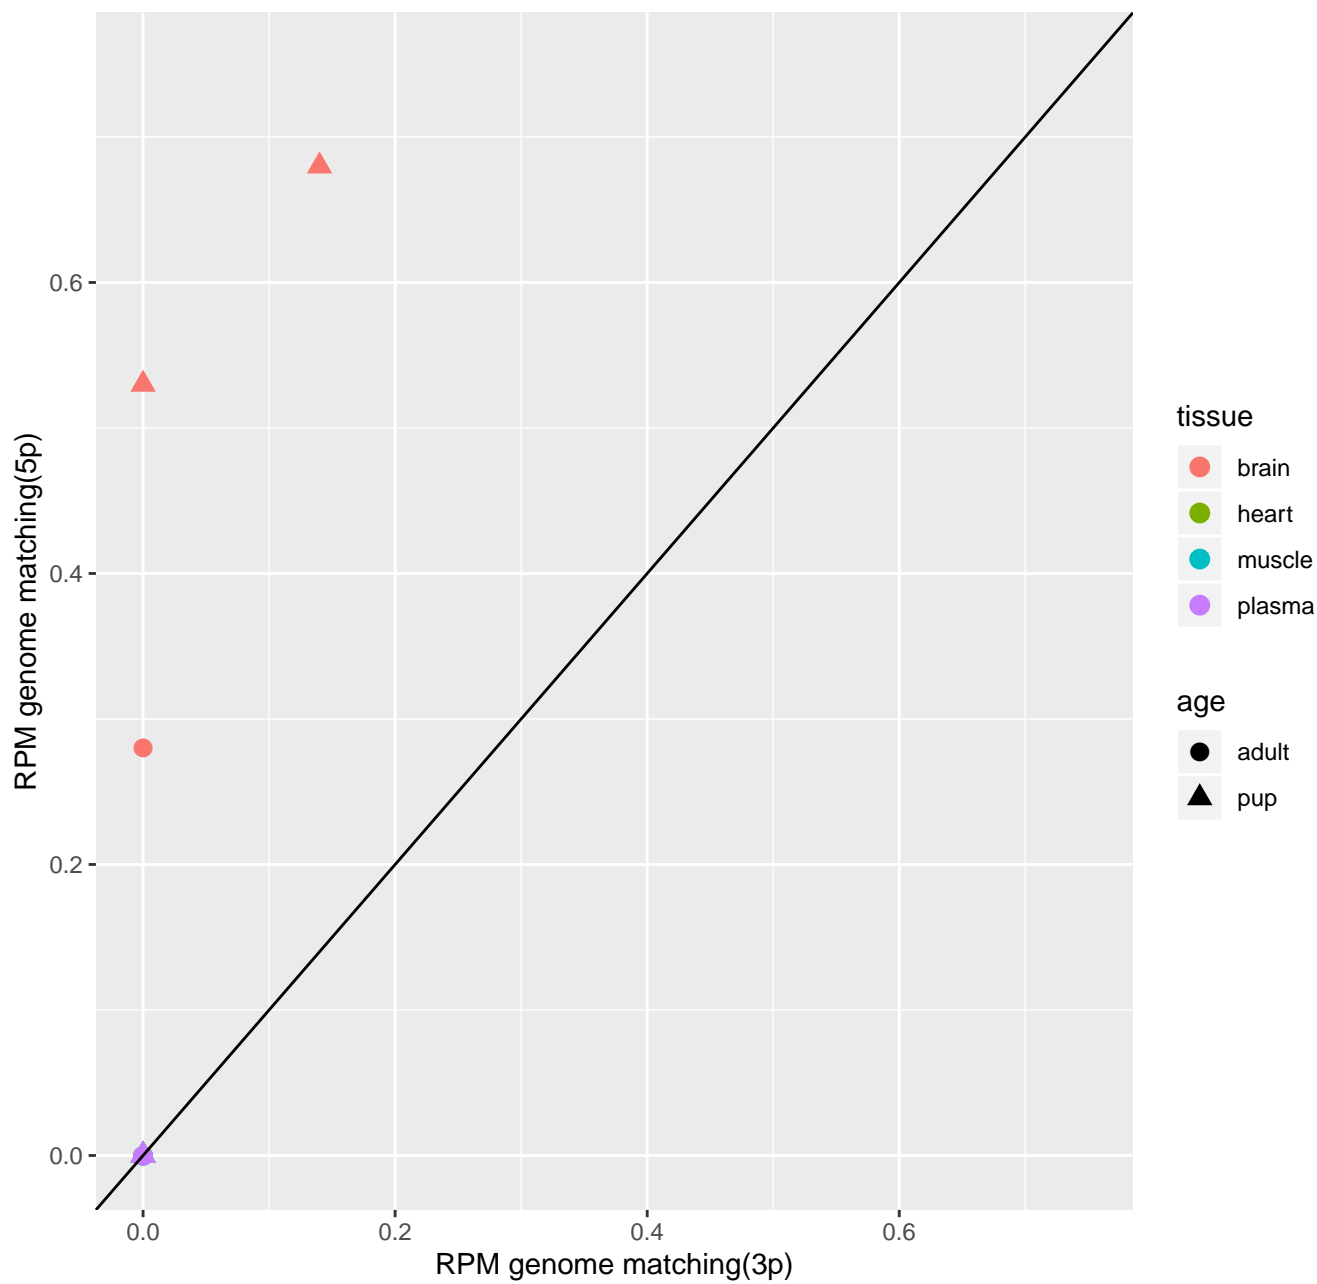

WS\_miRDeep2\_novel\_75

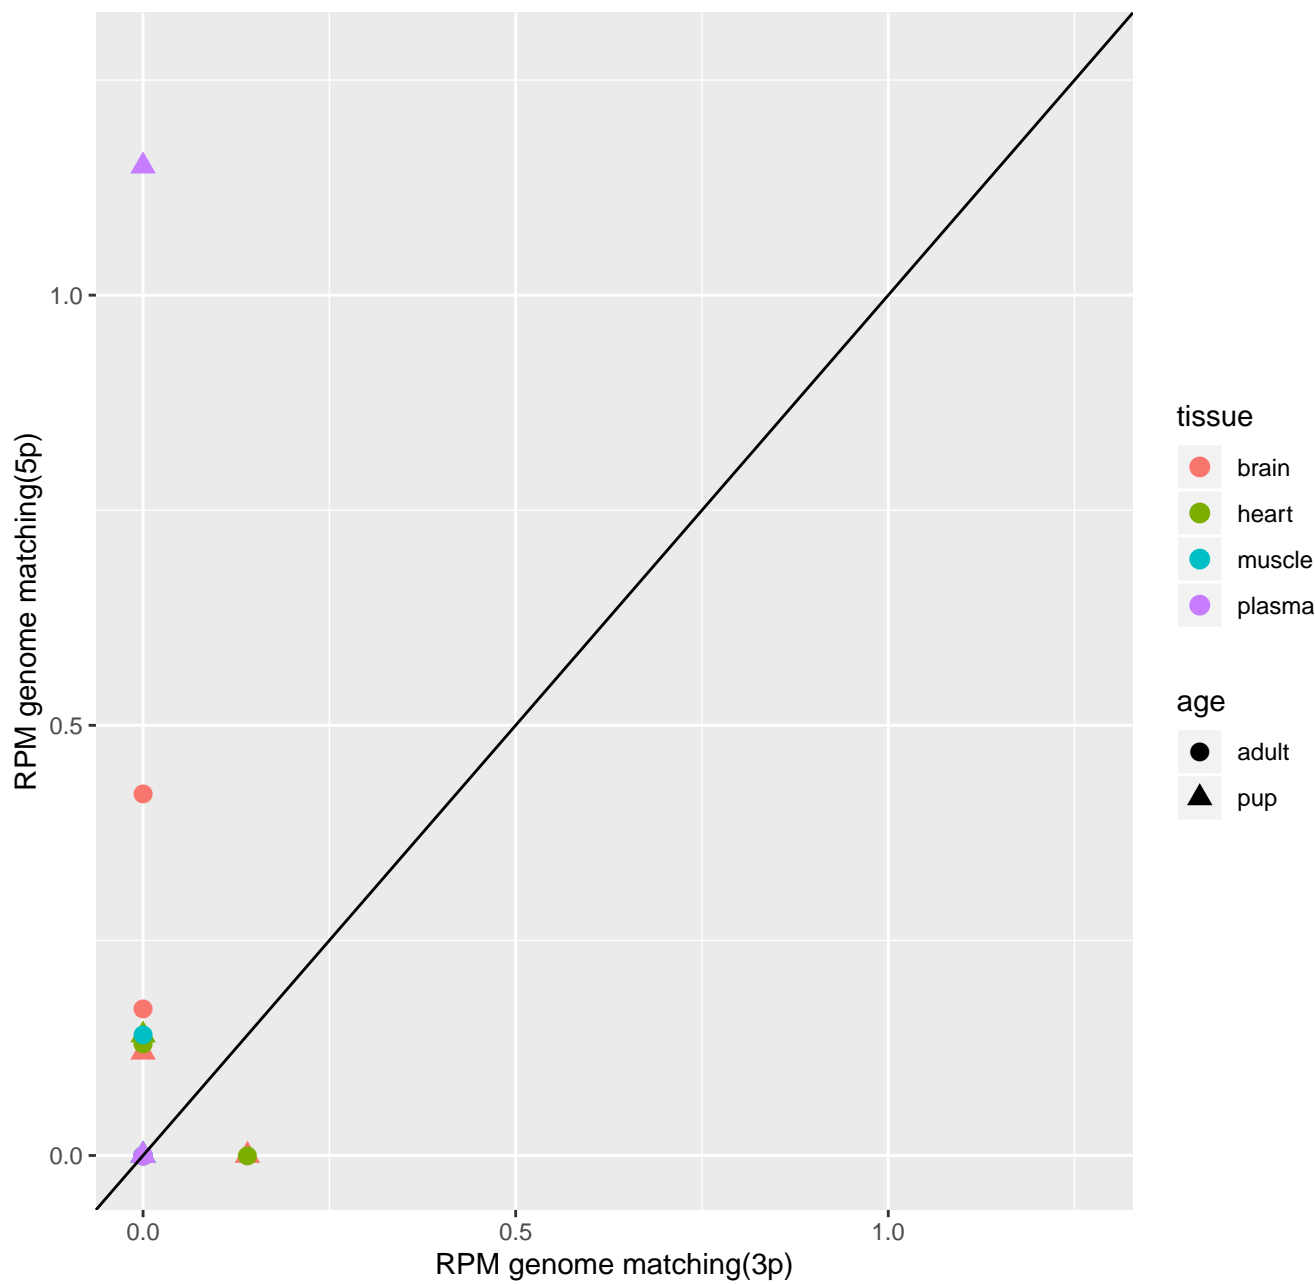



# lwe-miR-322;lwe-miR-424\_loc1"

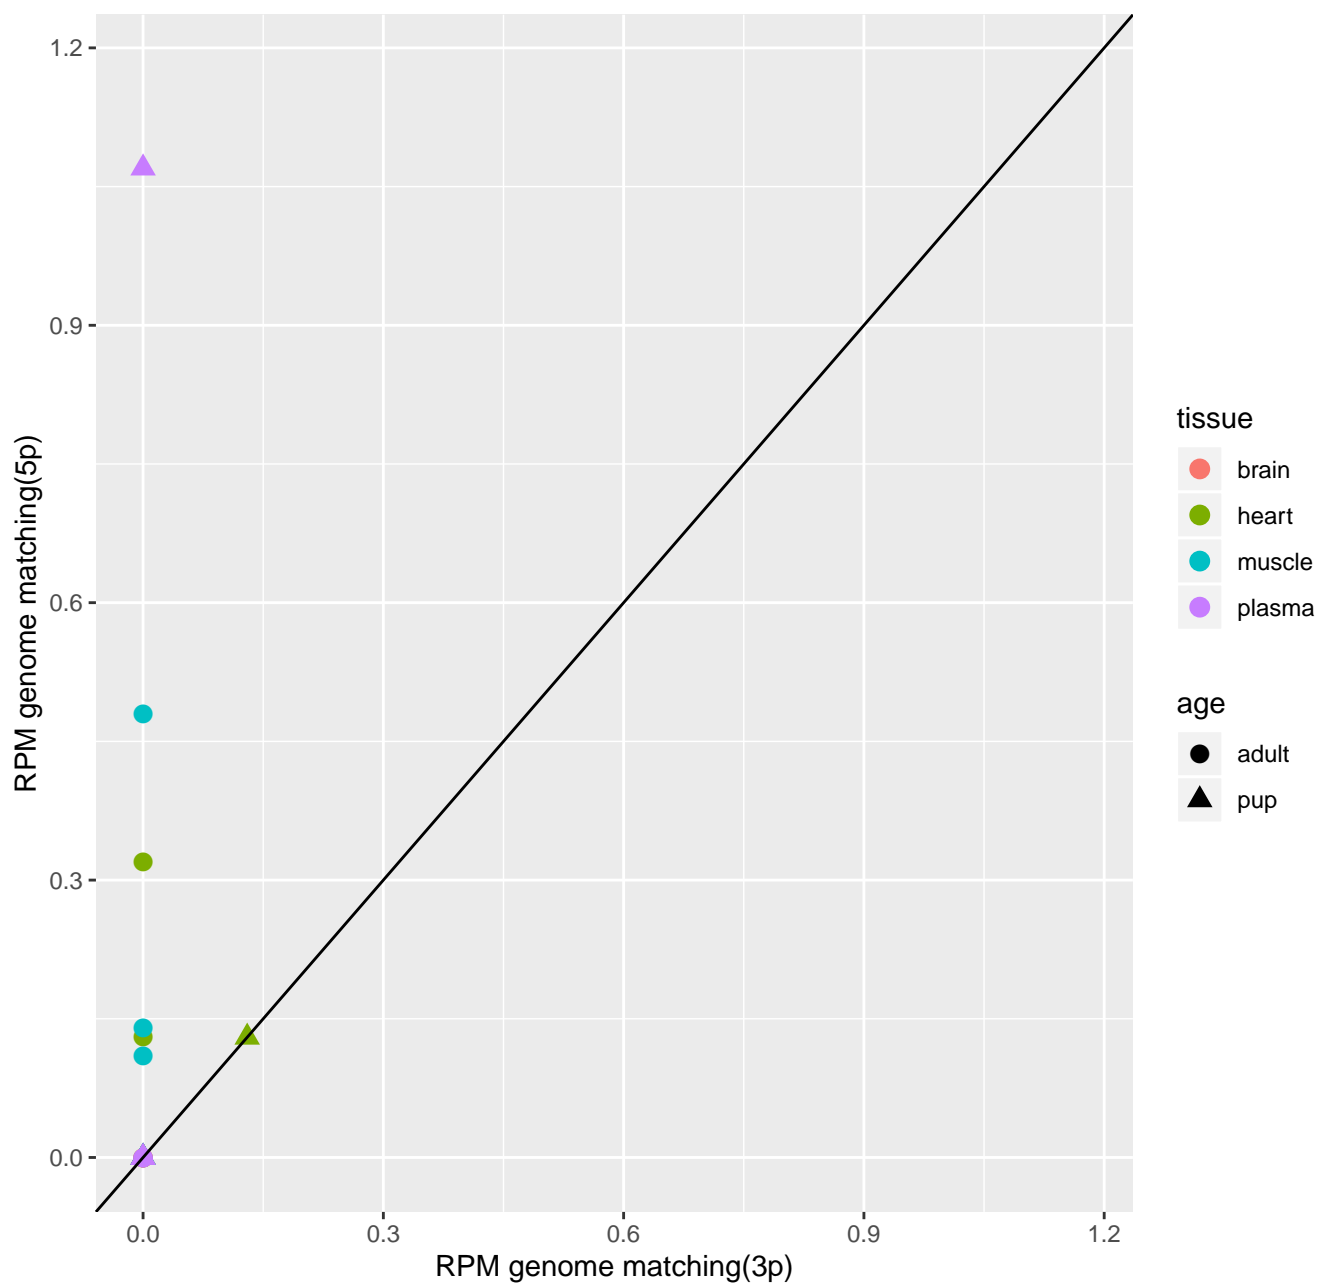

# WS\_miRDeep2\_novel\_77

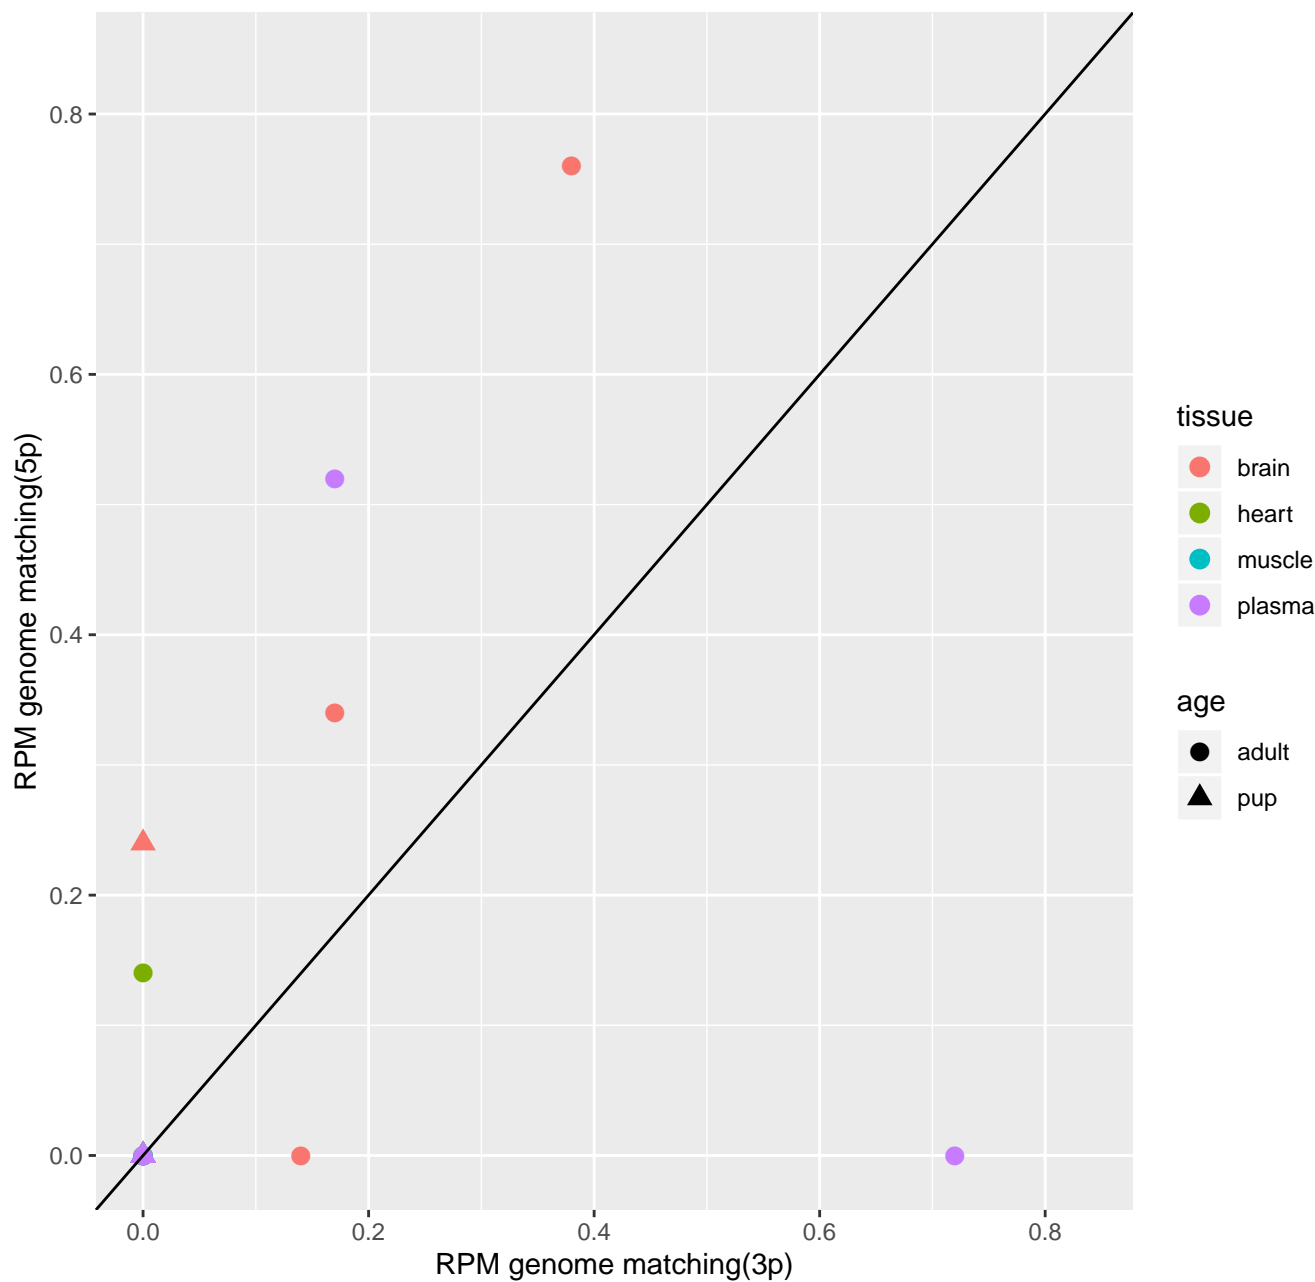

# WS\_miRDeep2\_novel\_78

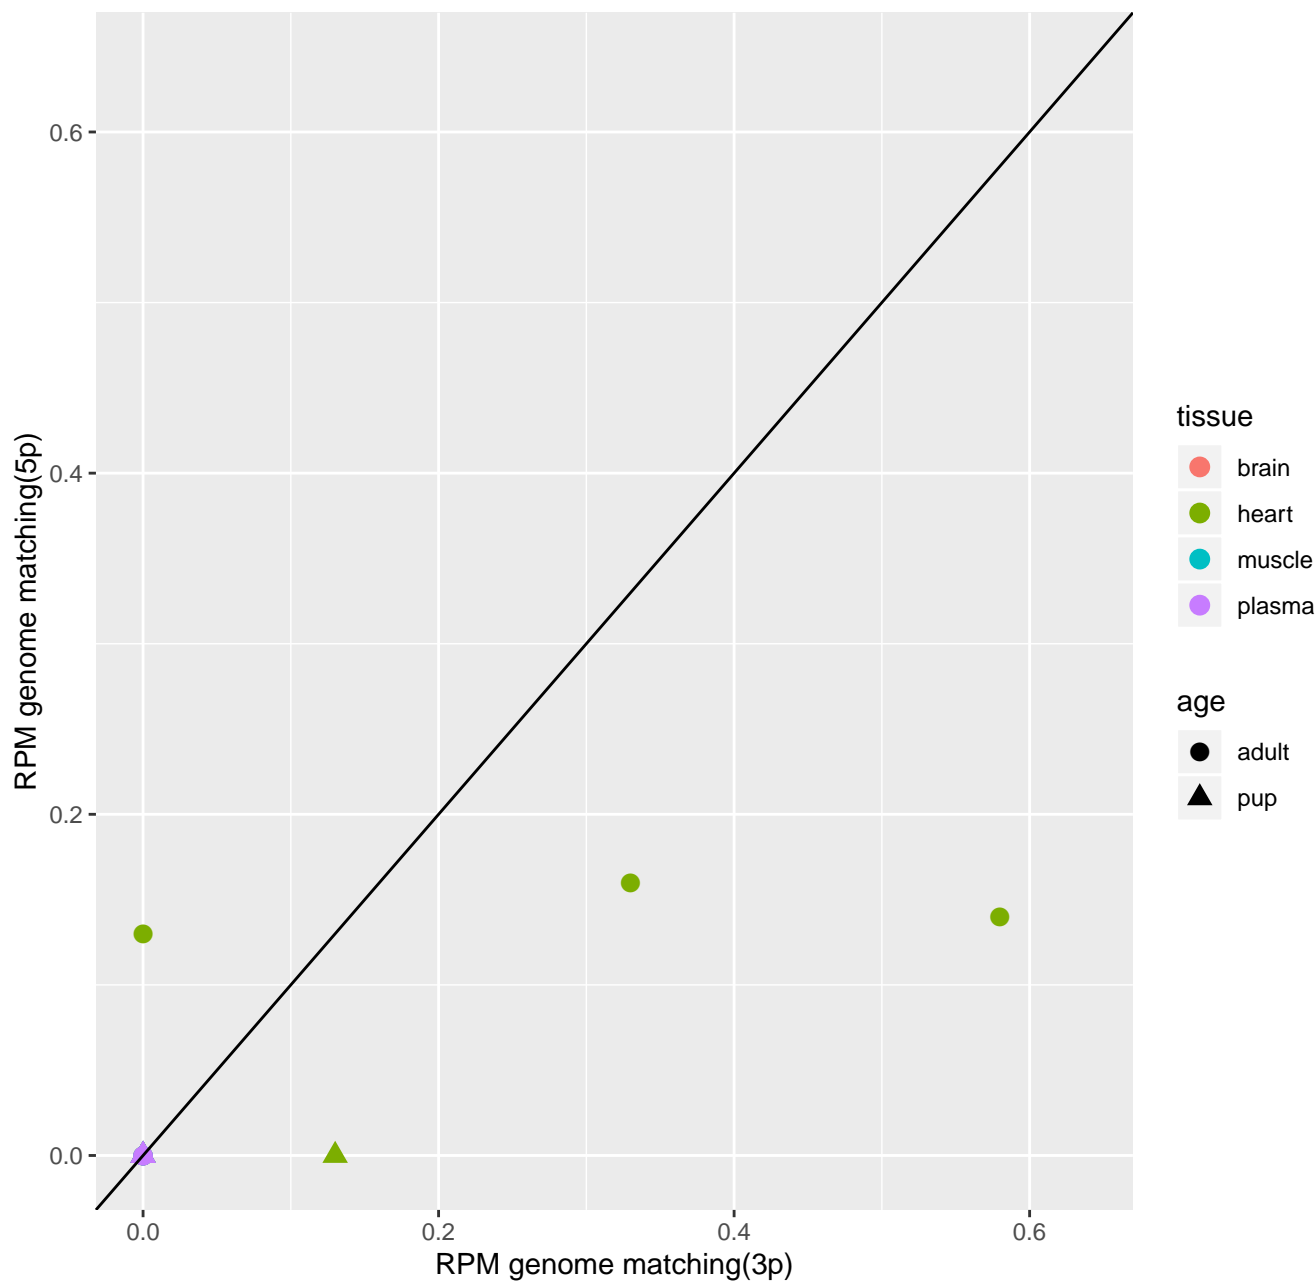

## WS\_miRDeep2\_novel\_79

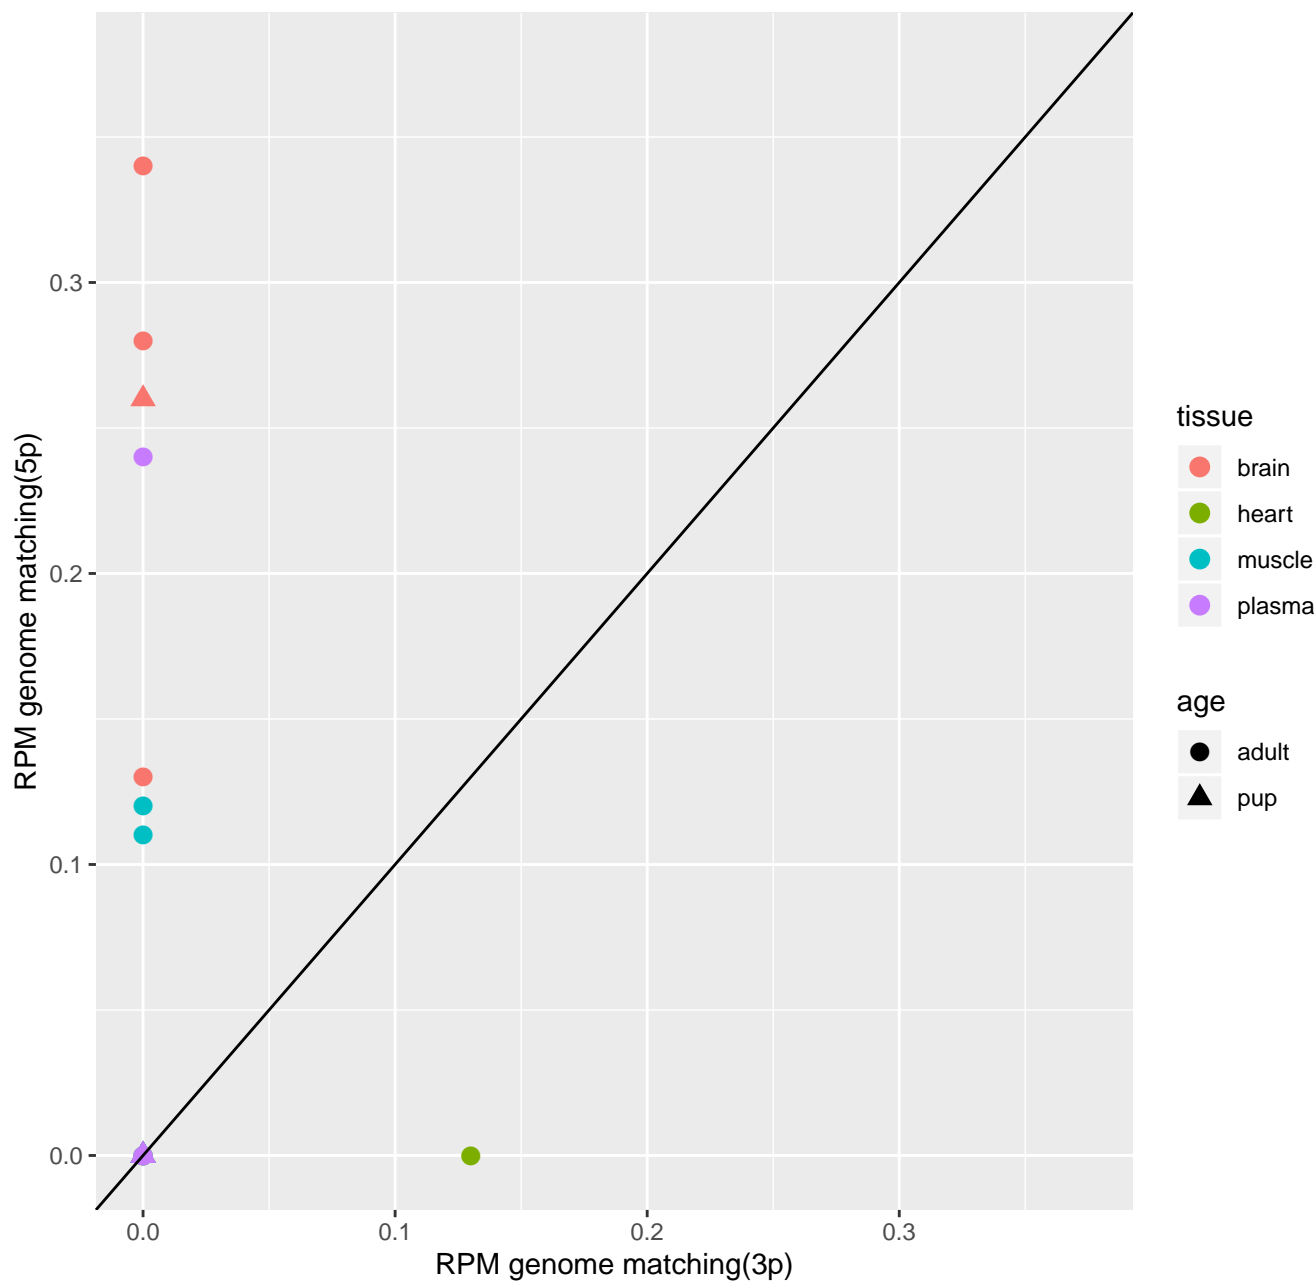



# WS\_miRDeep2\_novel\_80

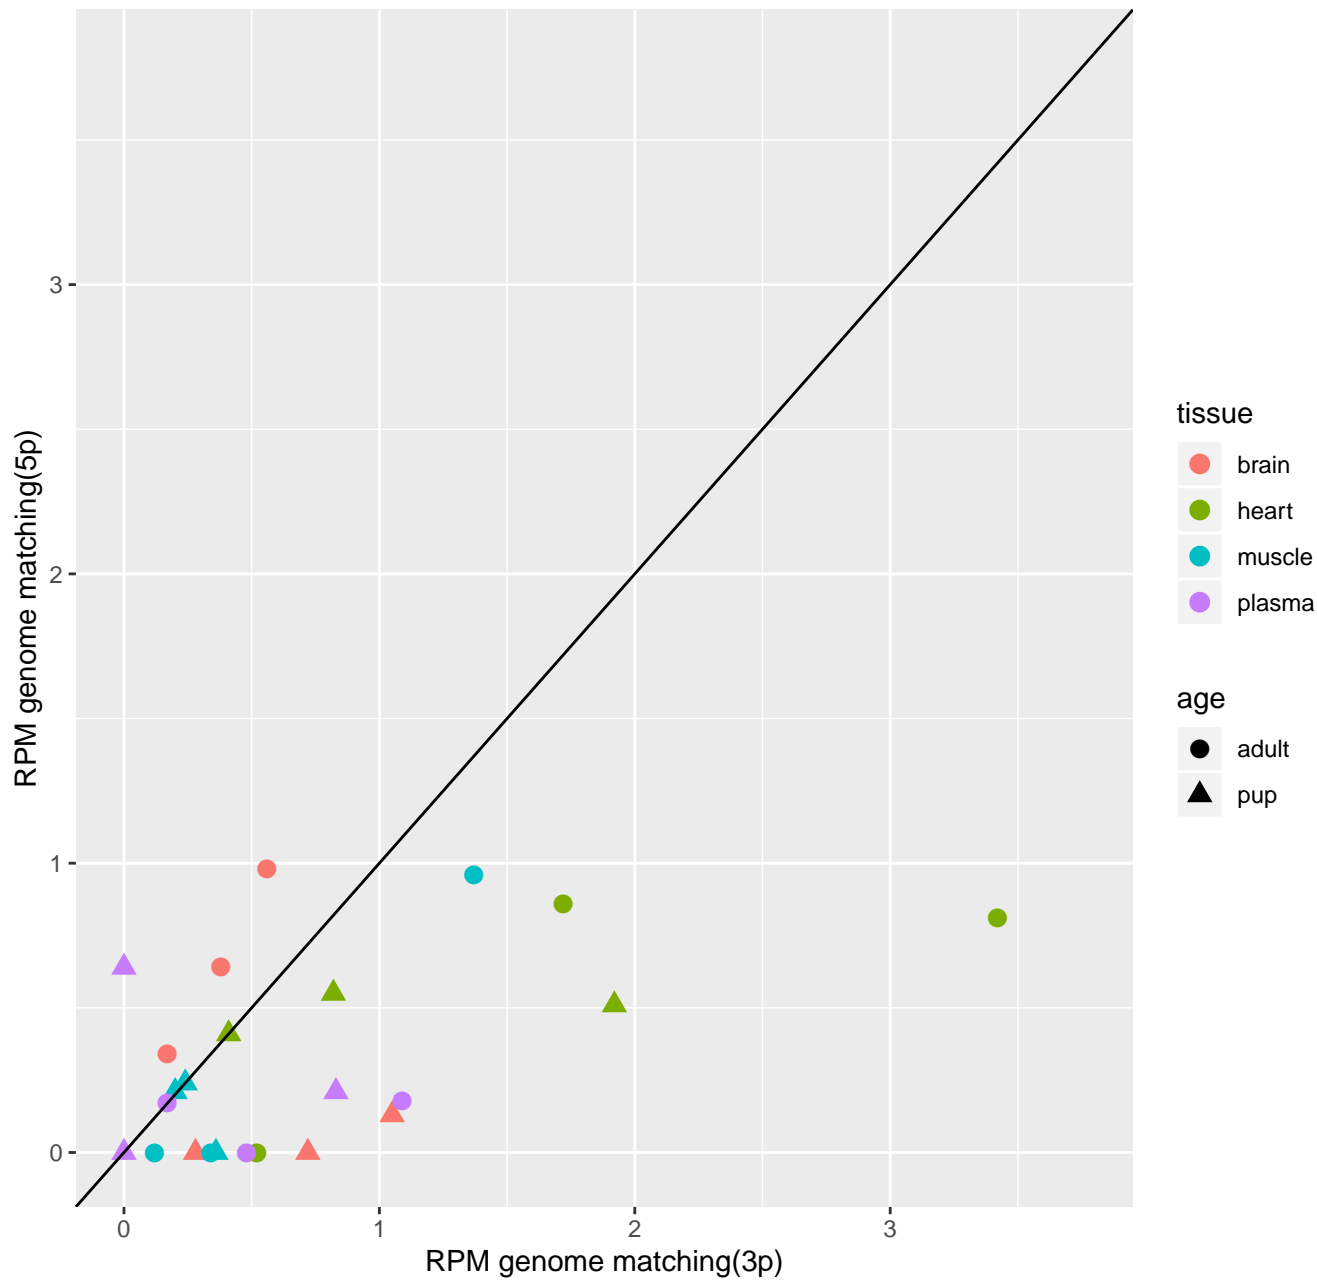

# WS\_miRDeep2\_novel\_81

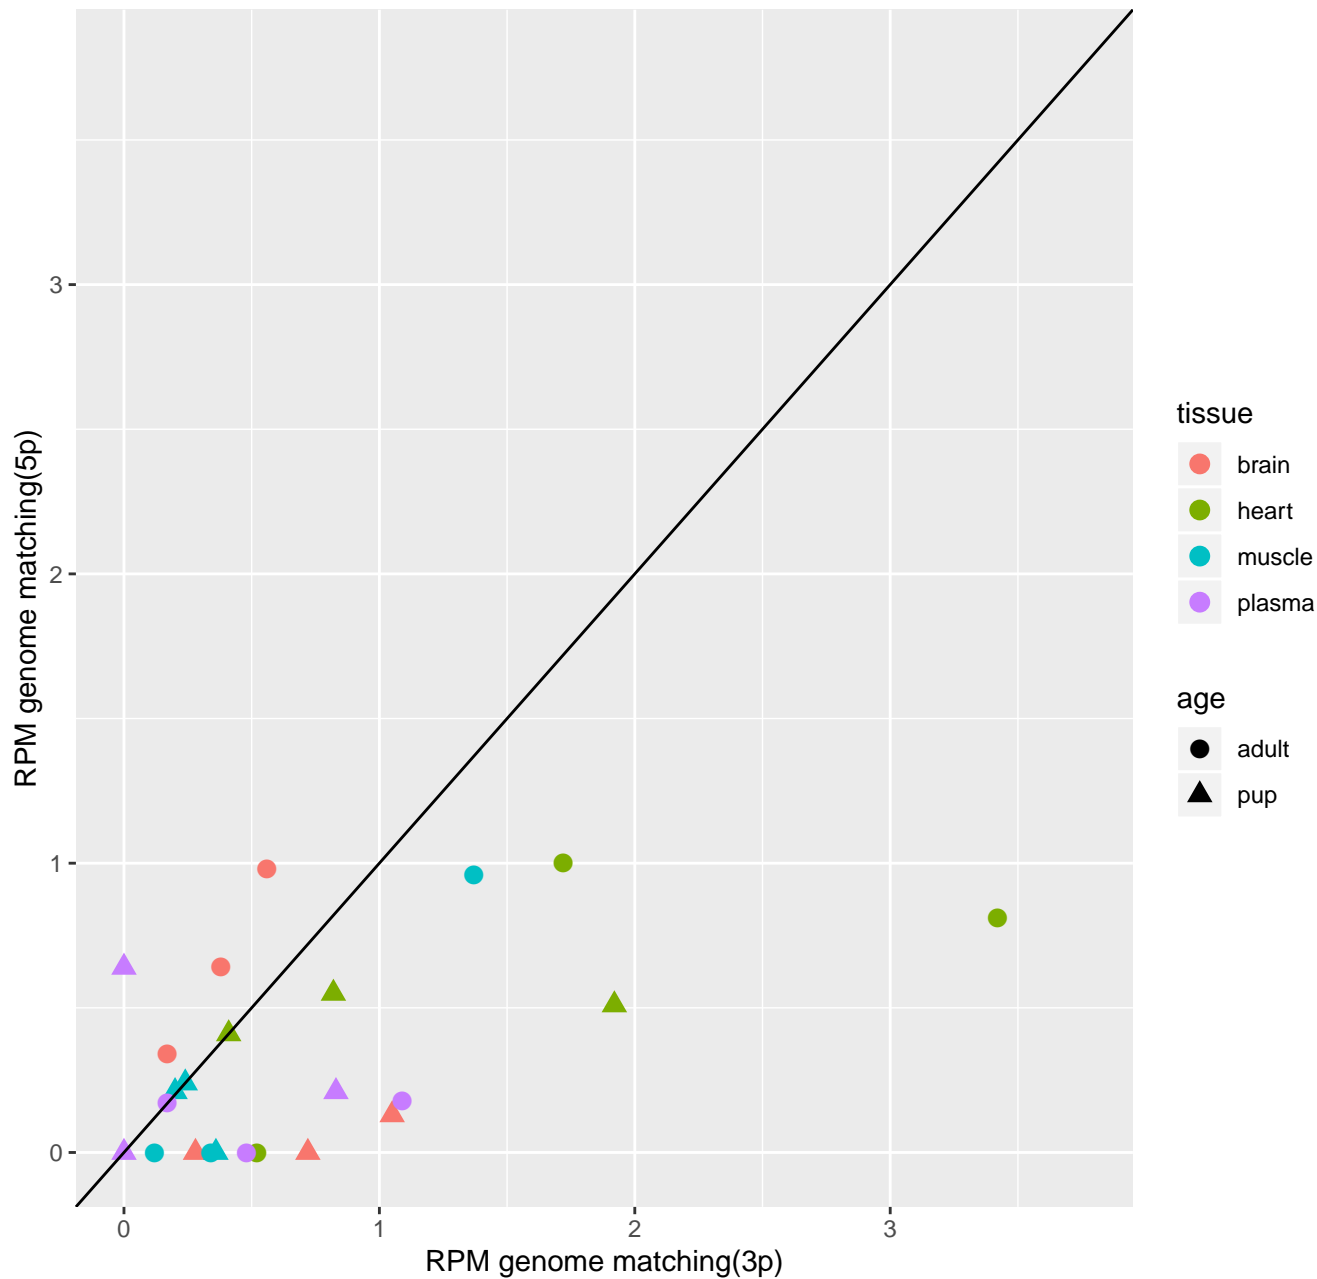

# WS\_miRDeep2\_novel\_82

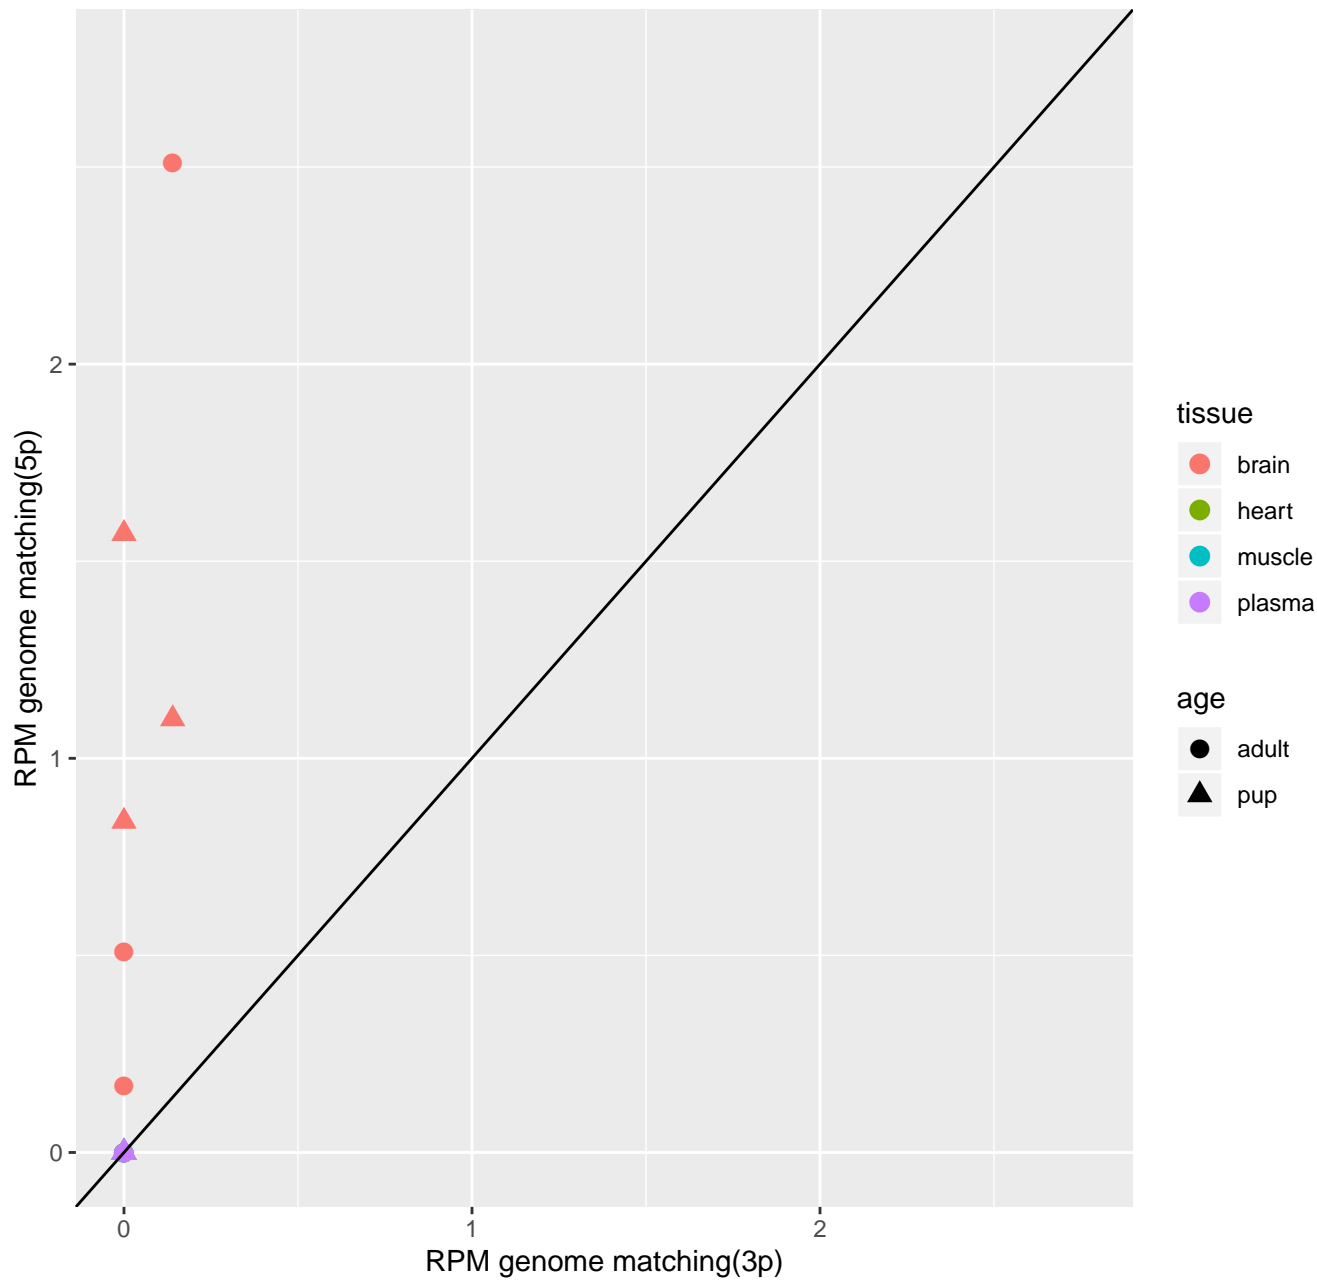

# WS\_miRDeep2\_novel\_83

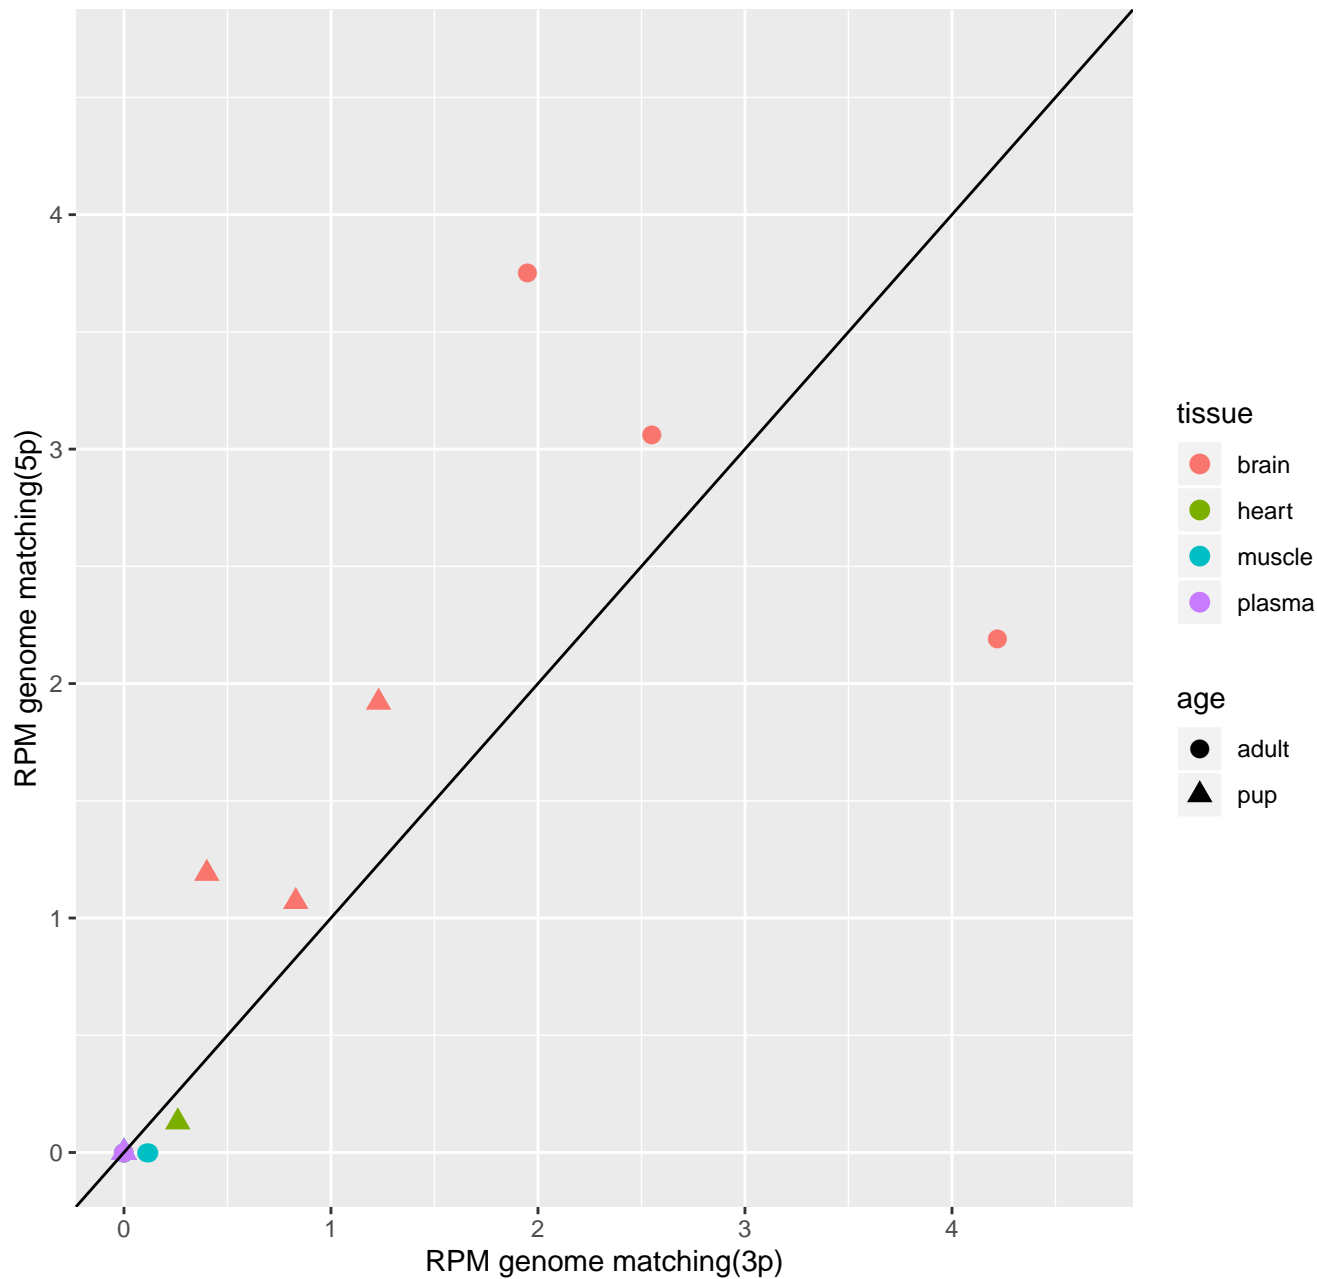

## WS\_miRDeep2\_novel\_84

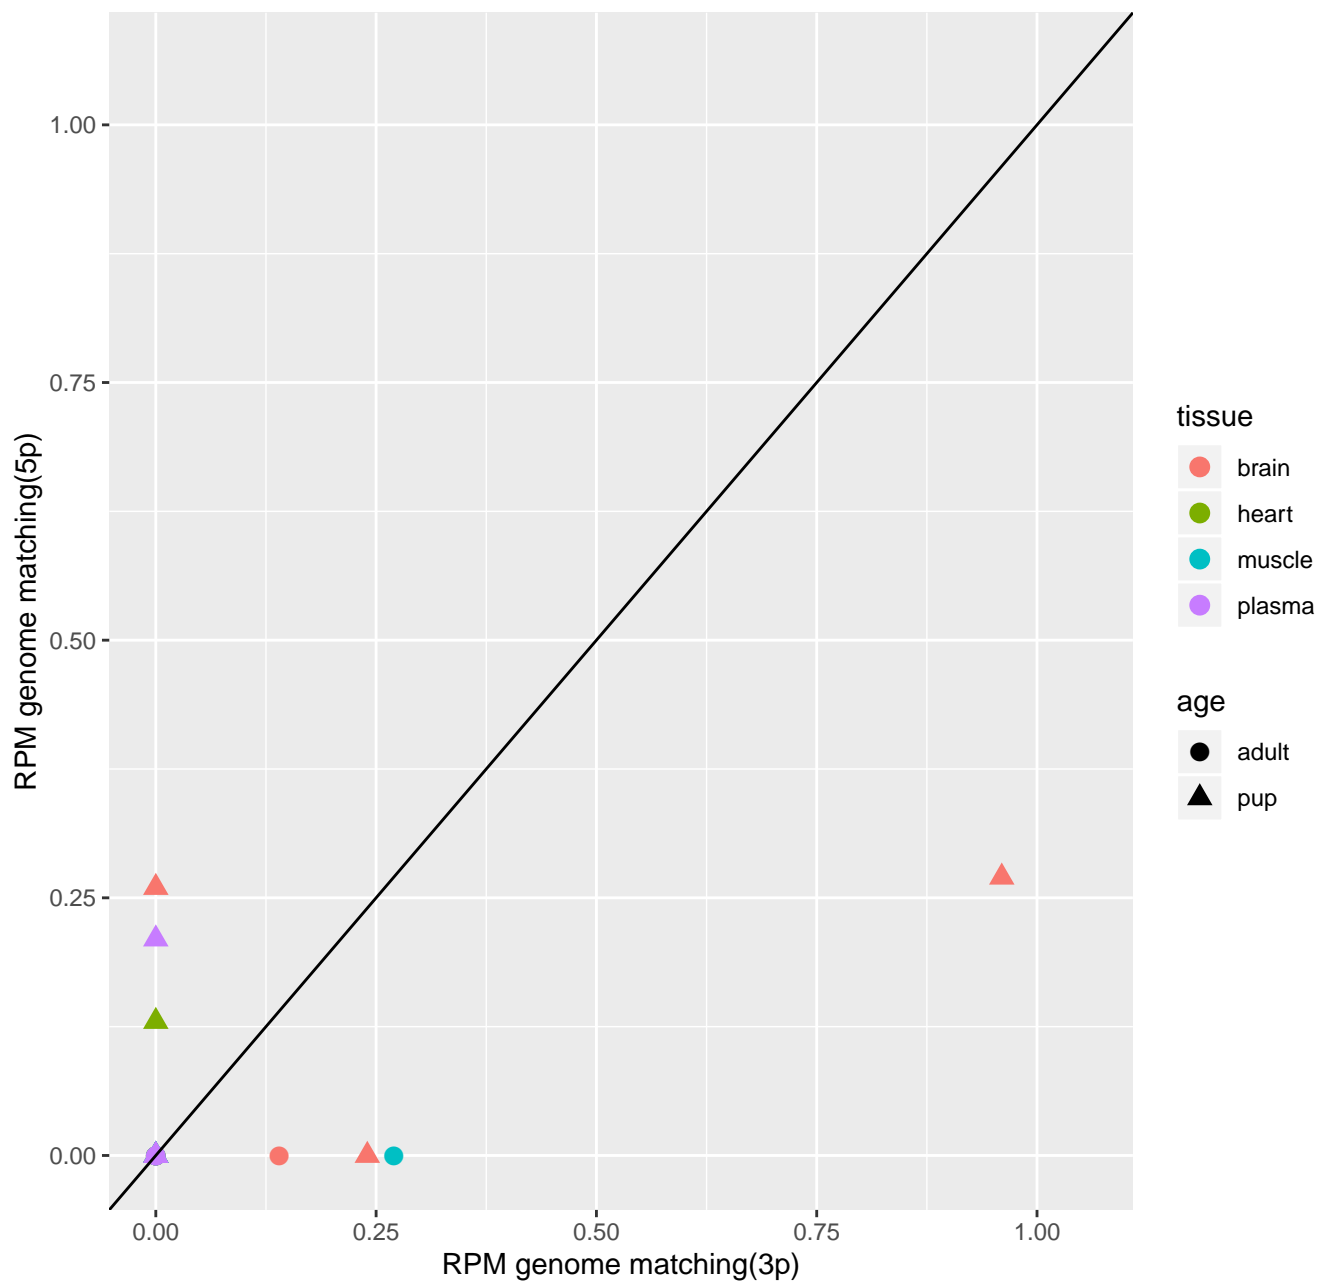

## WS\_miRDeep2\_novel\_85

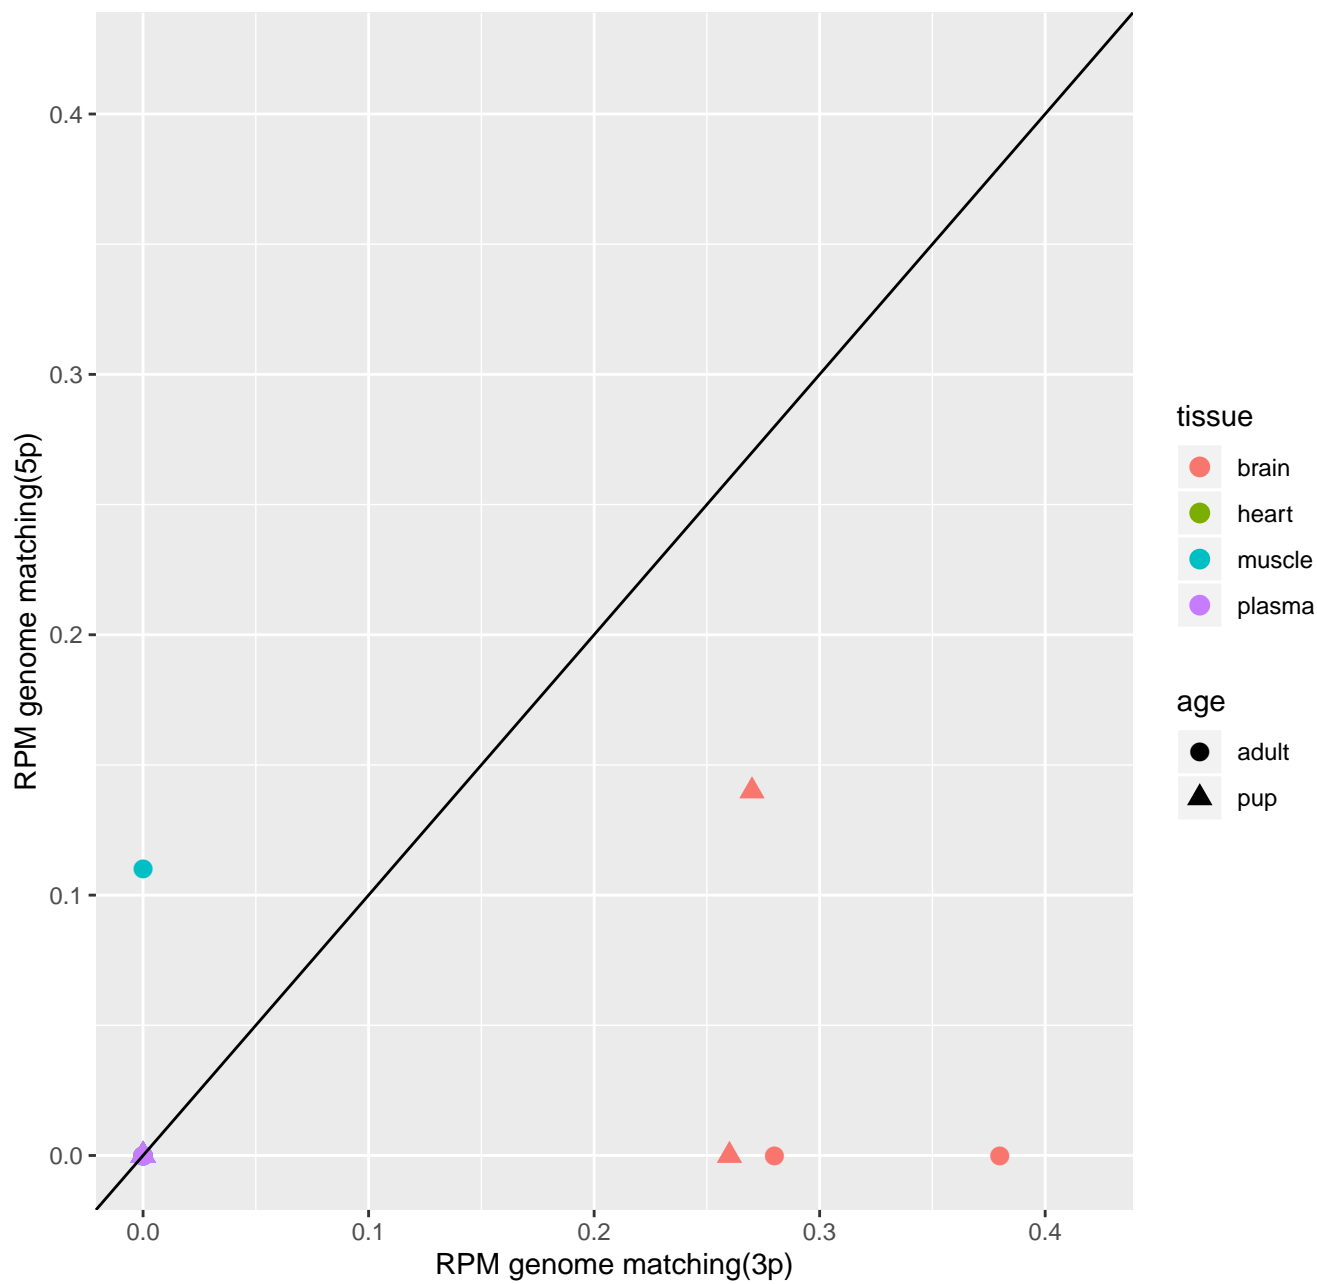

# WS\_miRDeep2\_novel\_86

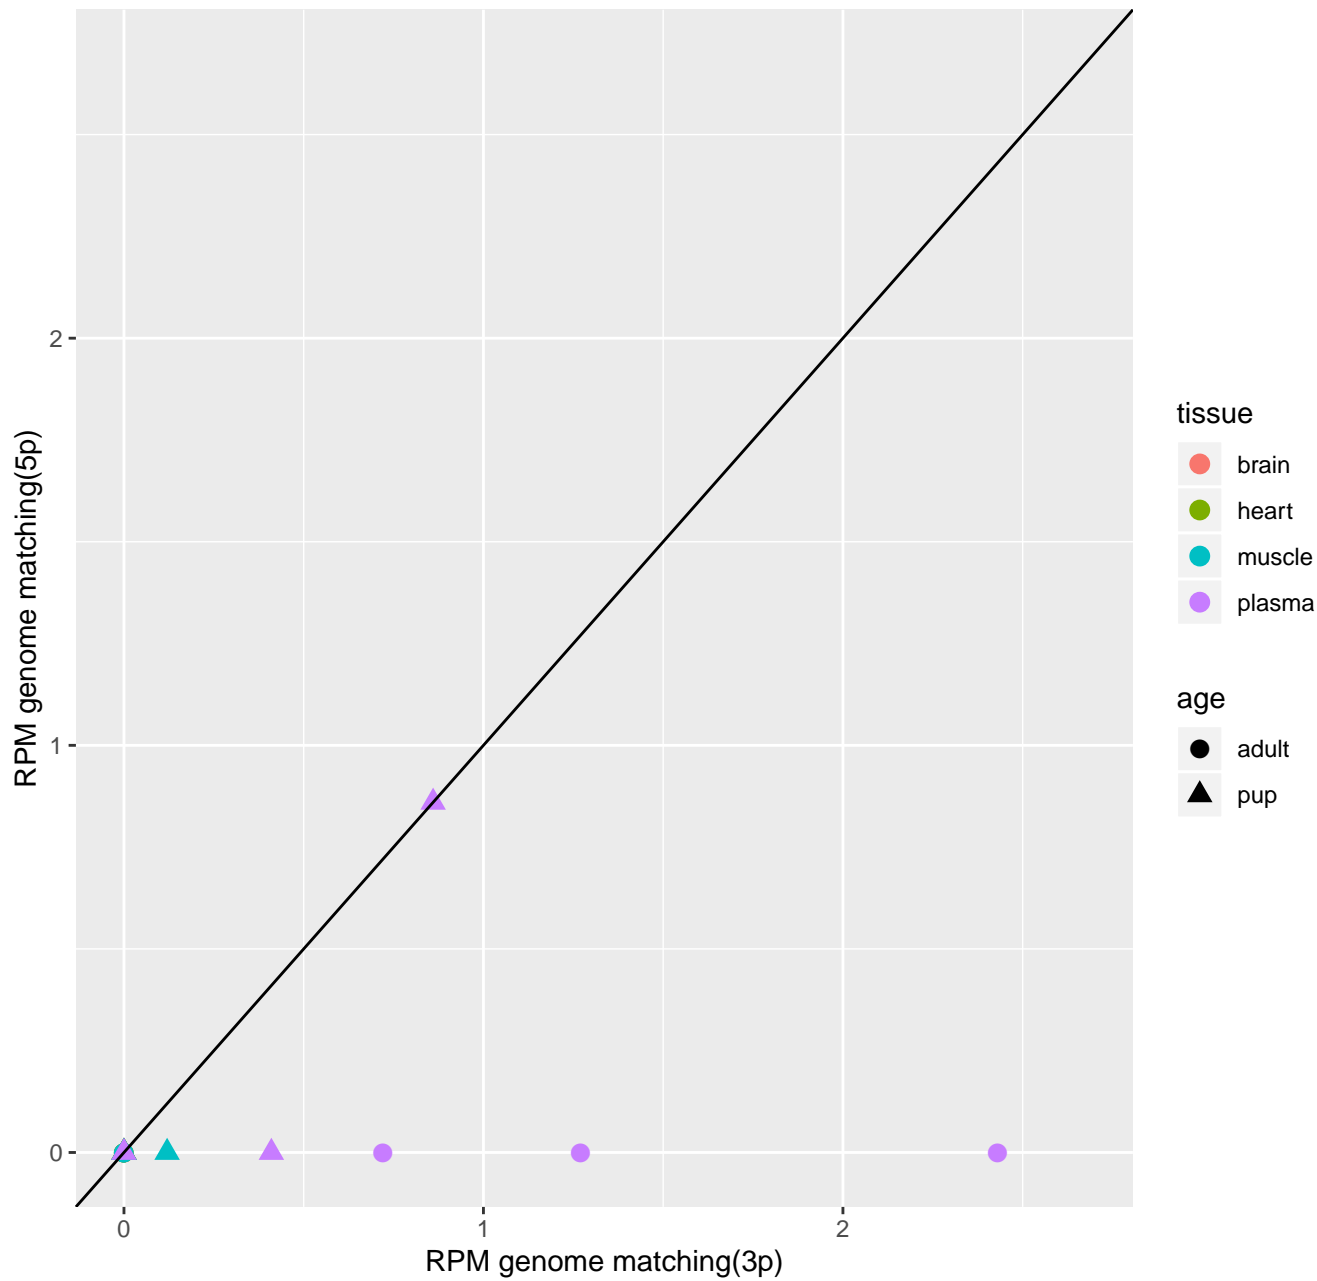

## lwe-miR-486\_miRDeep2\_loc1

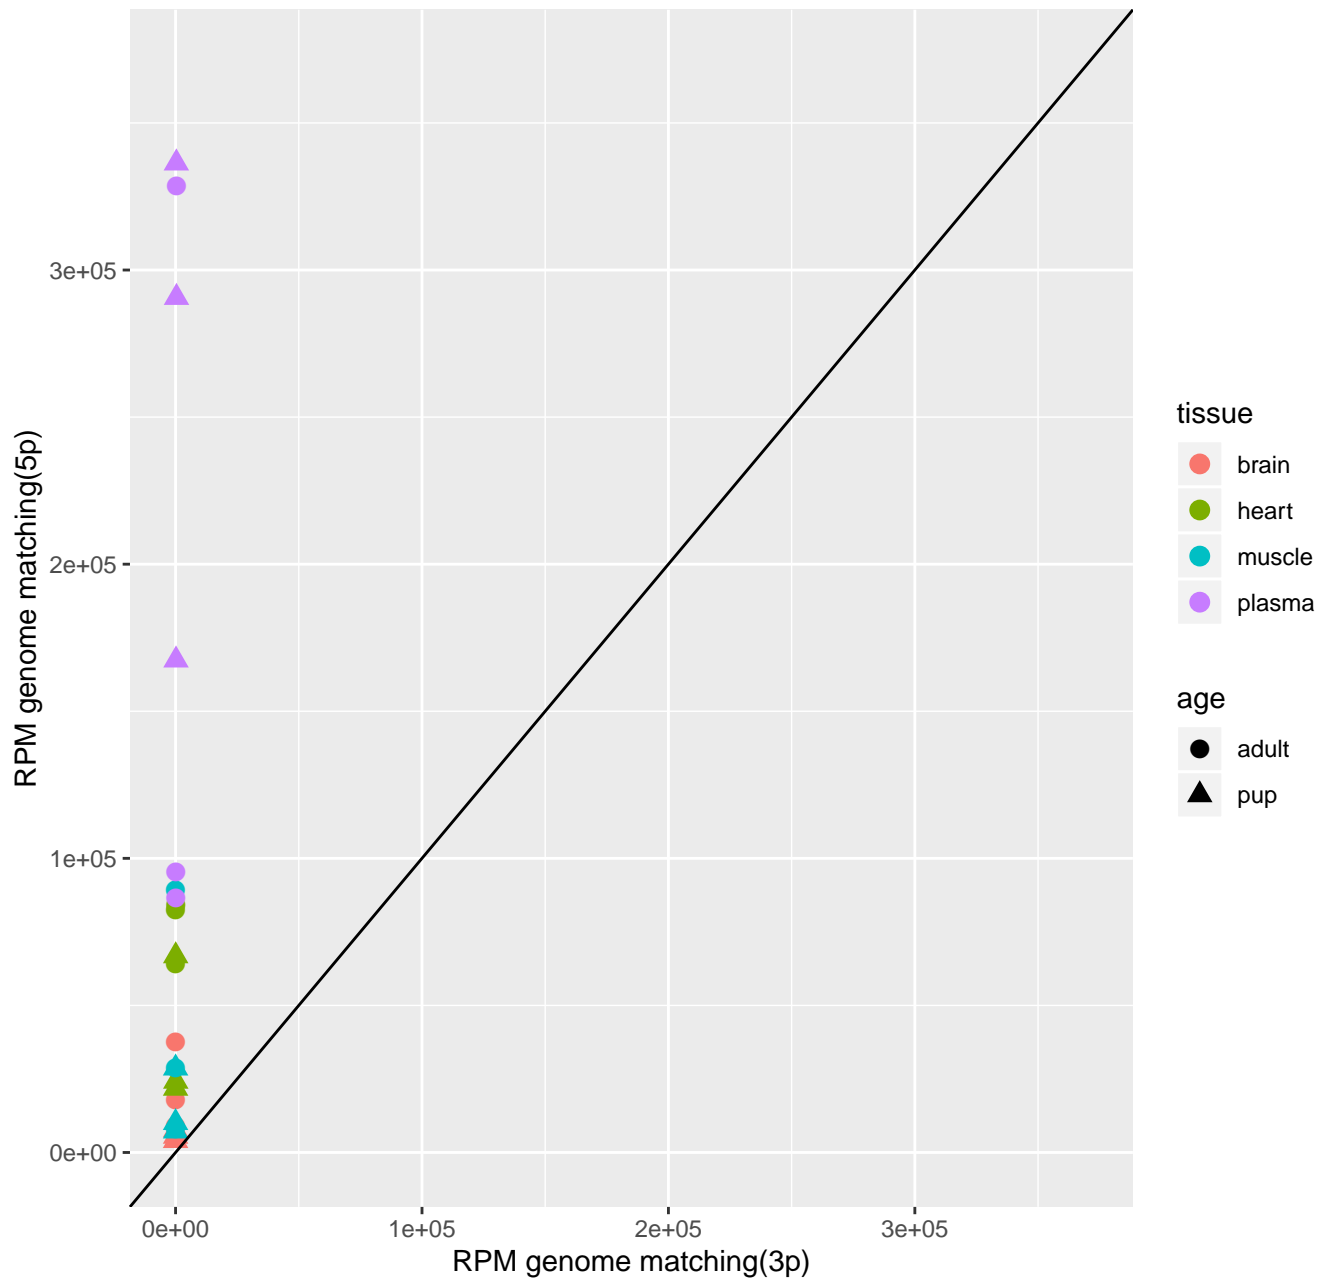





# WS\_miRDeep2\_novel\_87

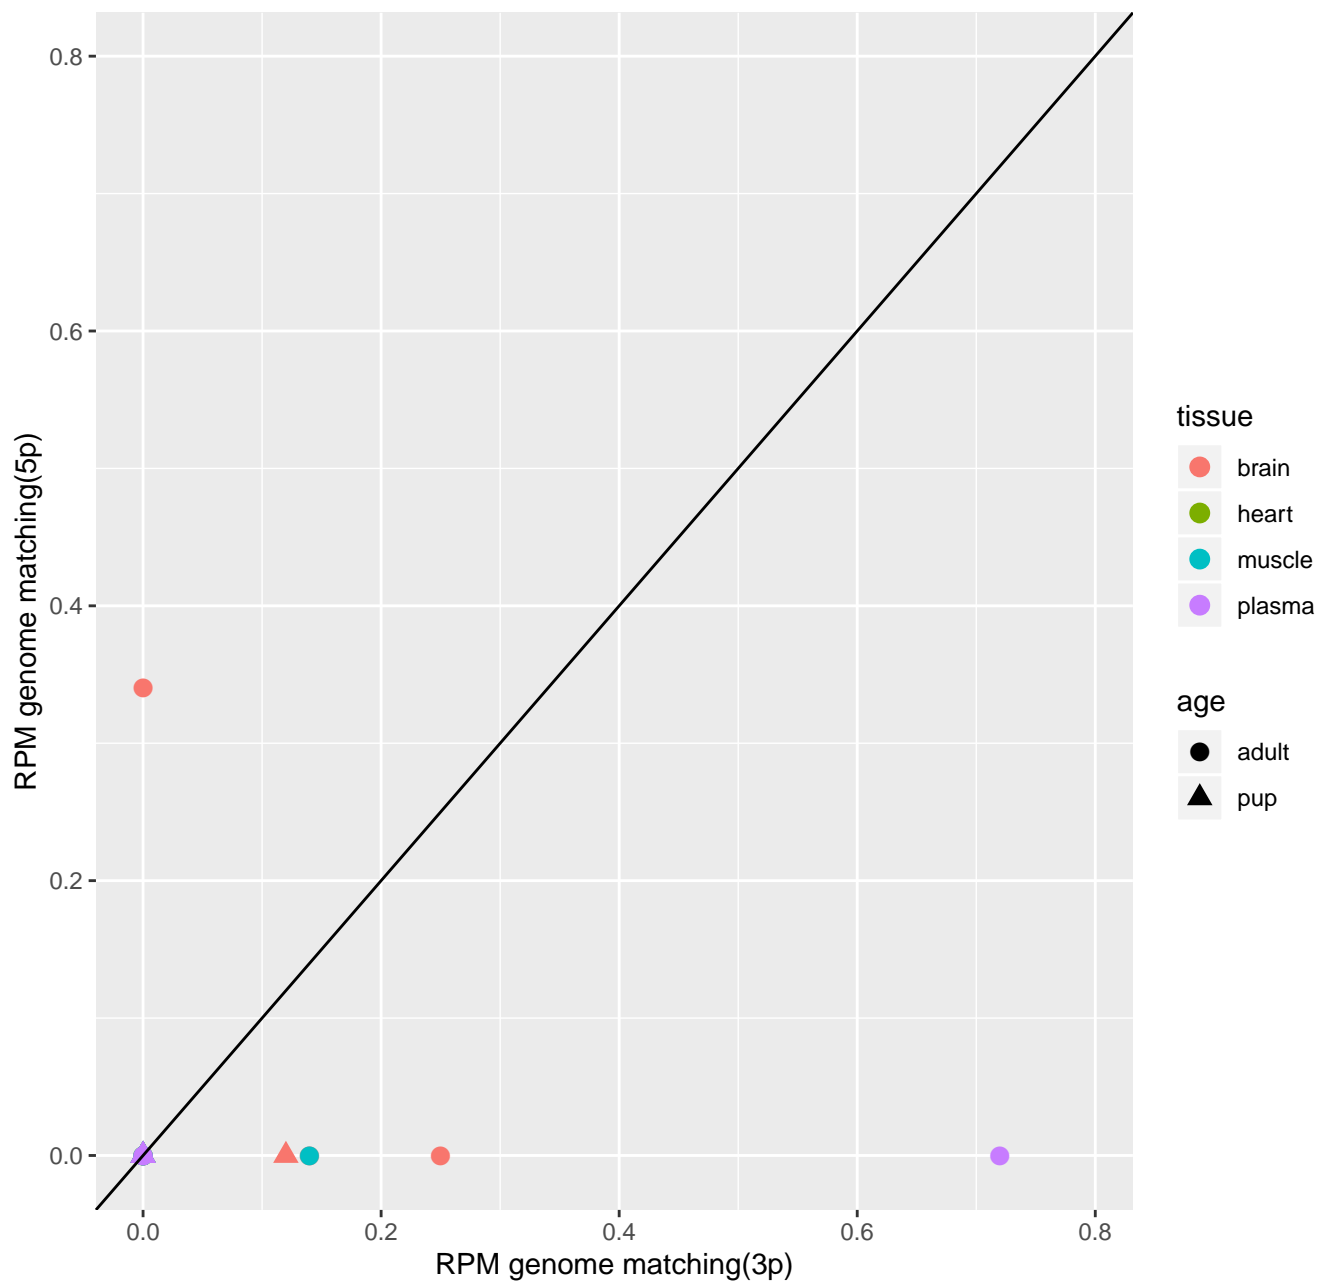

## lwe-miR-30e\_miRDeep2\_loc1

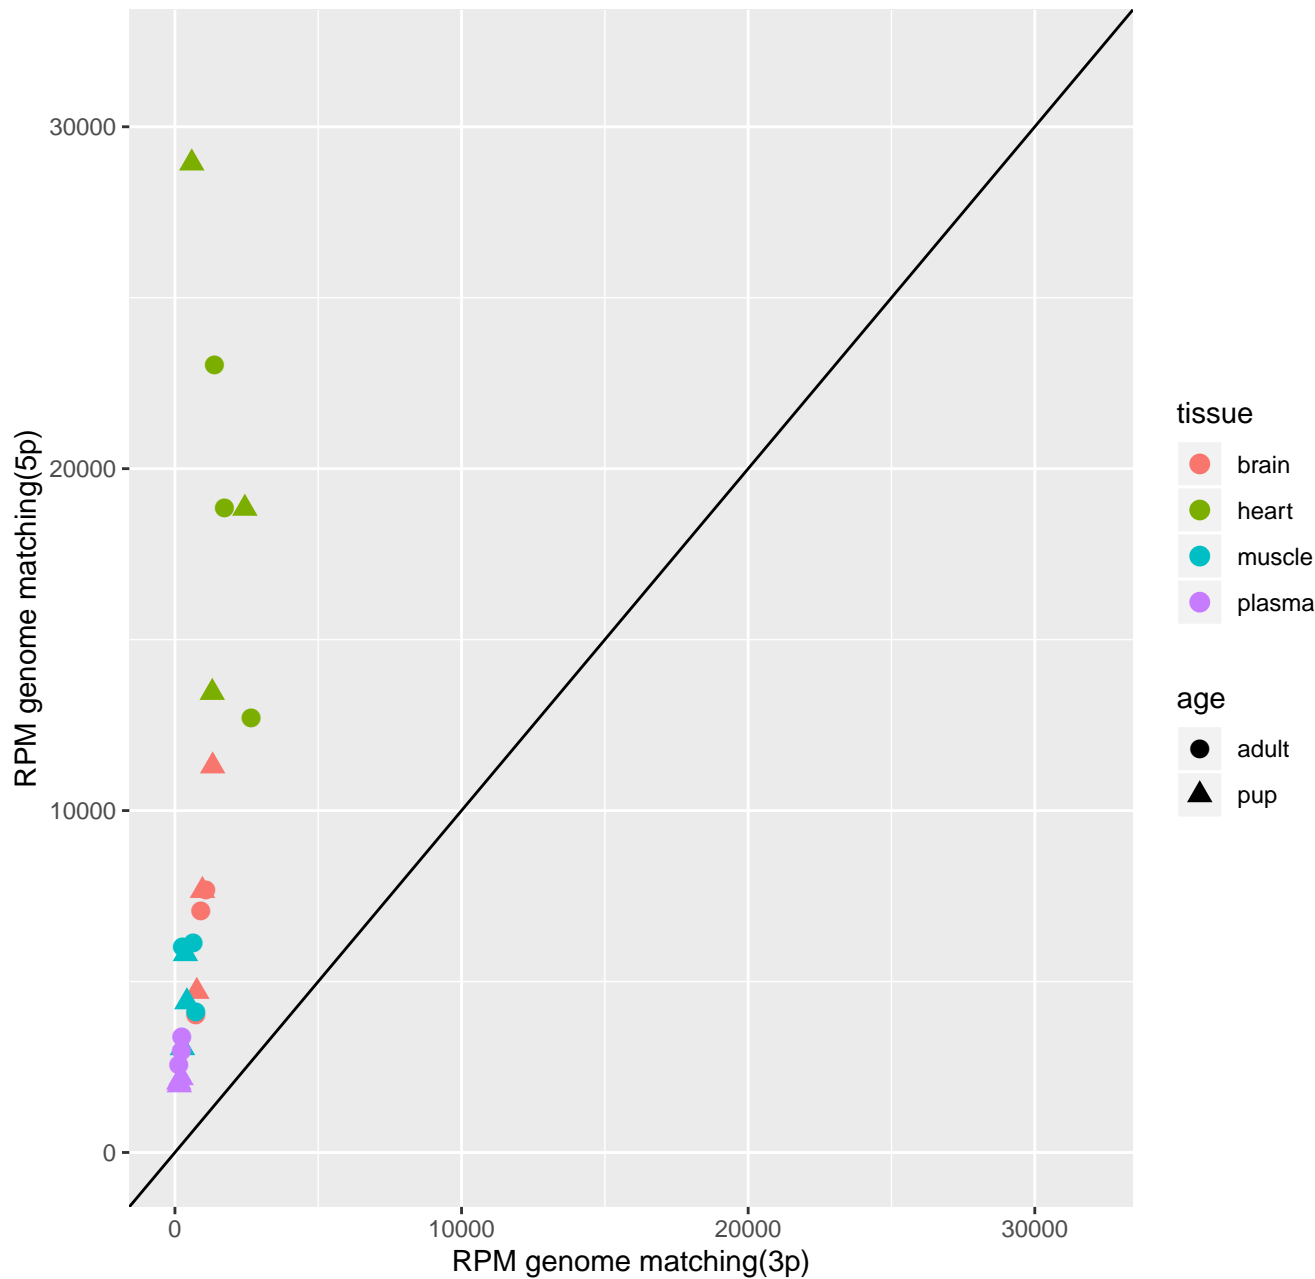

## lwe-miR-708\_miRDeep2\_loc1

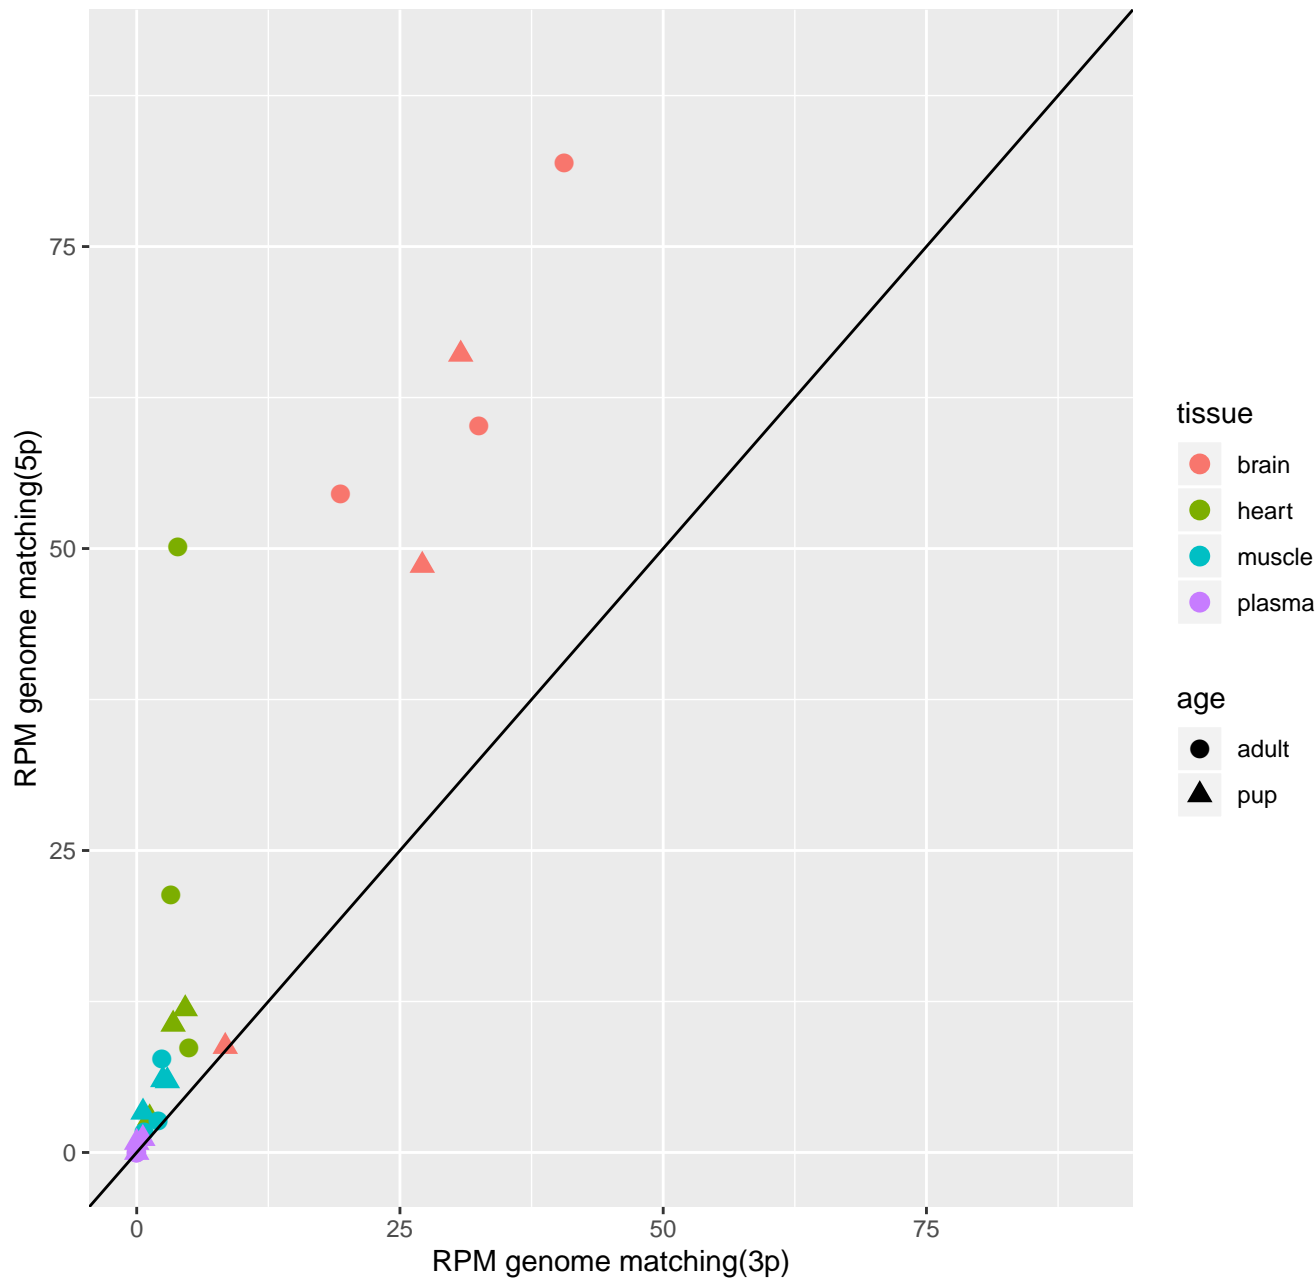

## lwe-miR-320\_miRDeep2\_loc1

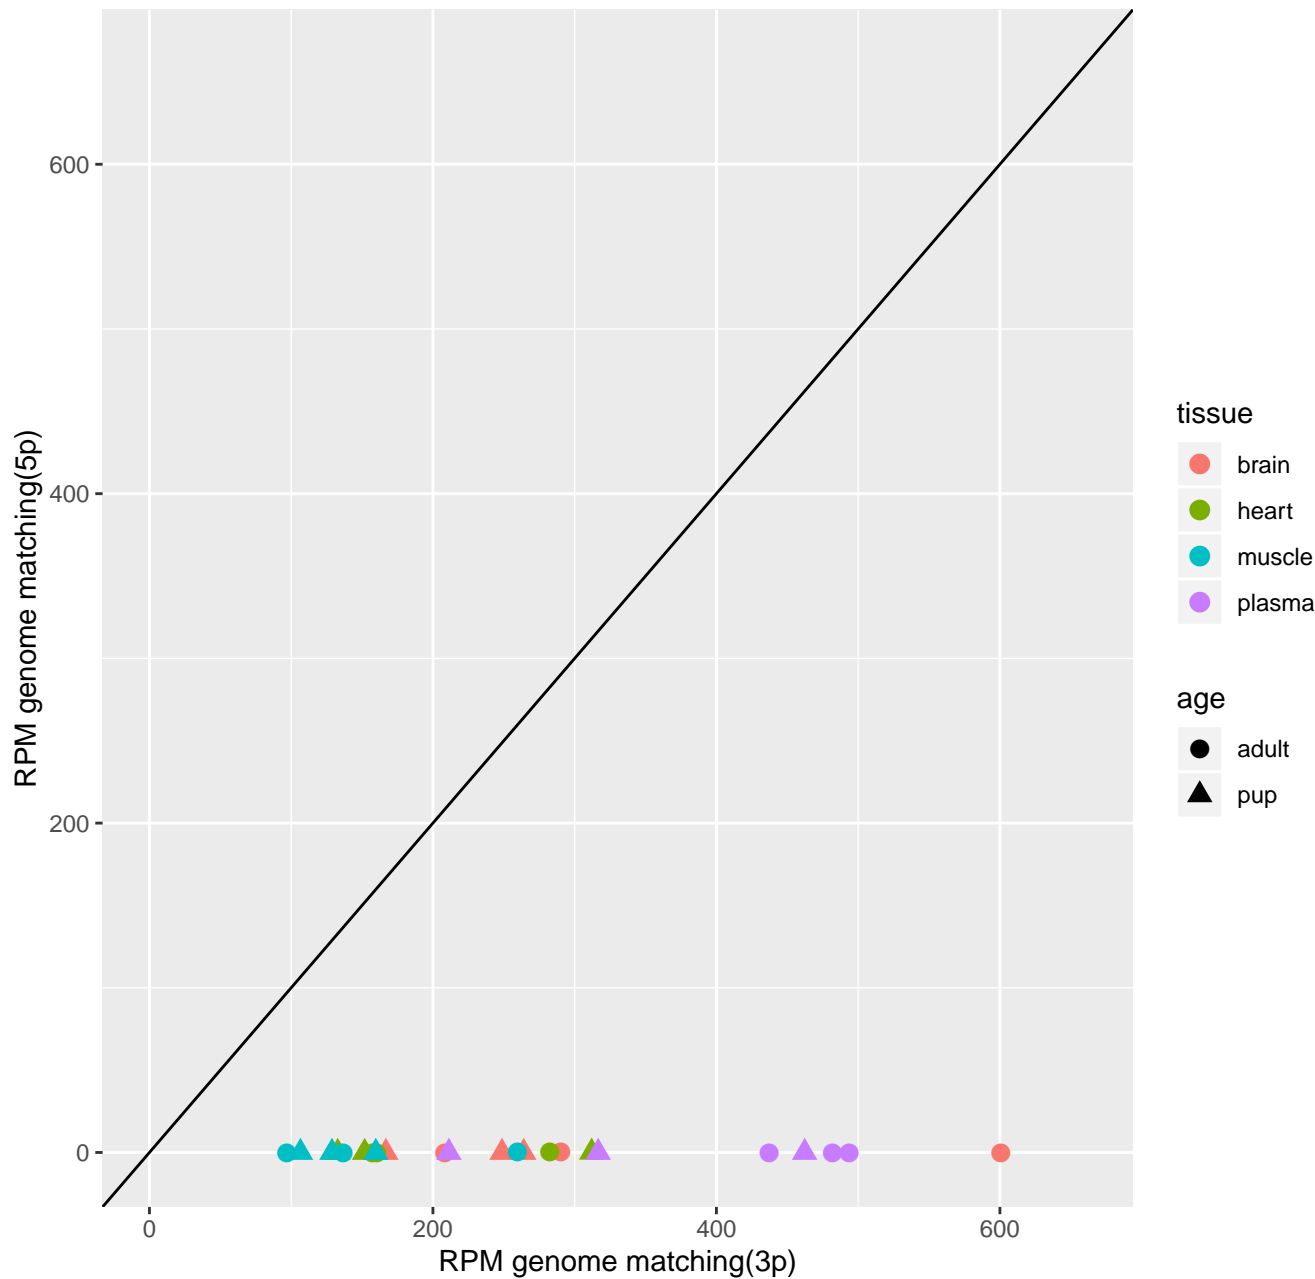

WS\_miRDeep2\_novel\_88

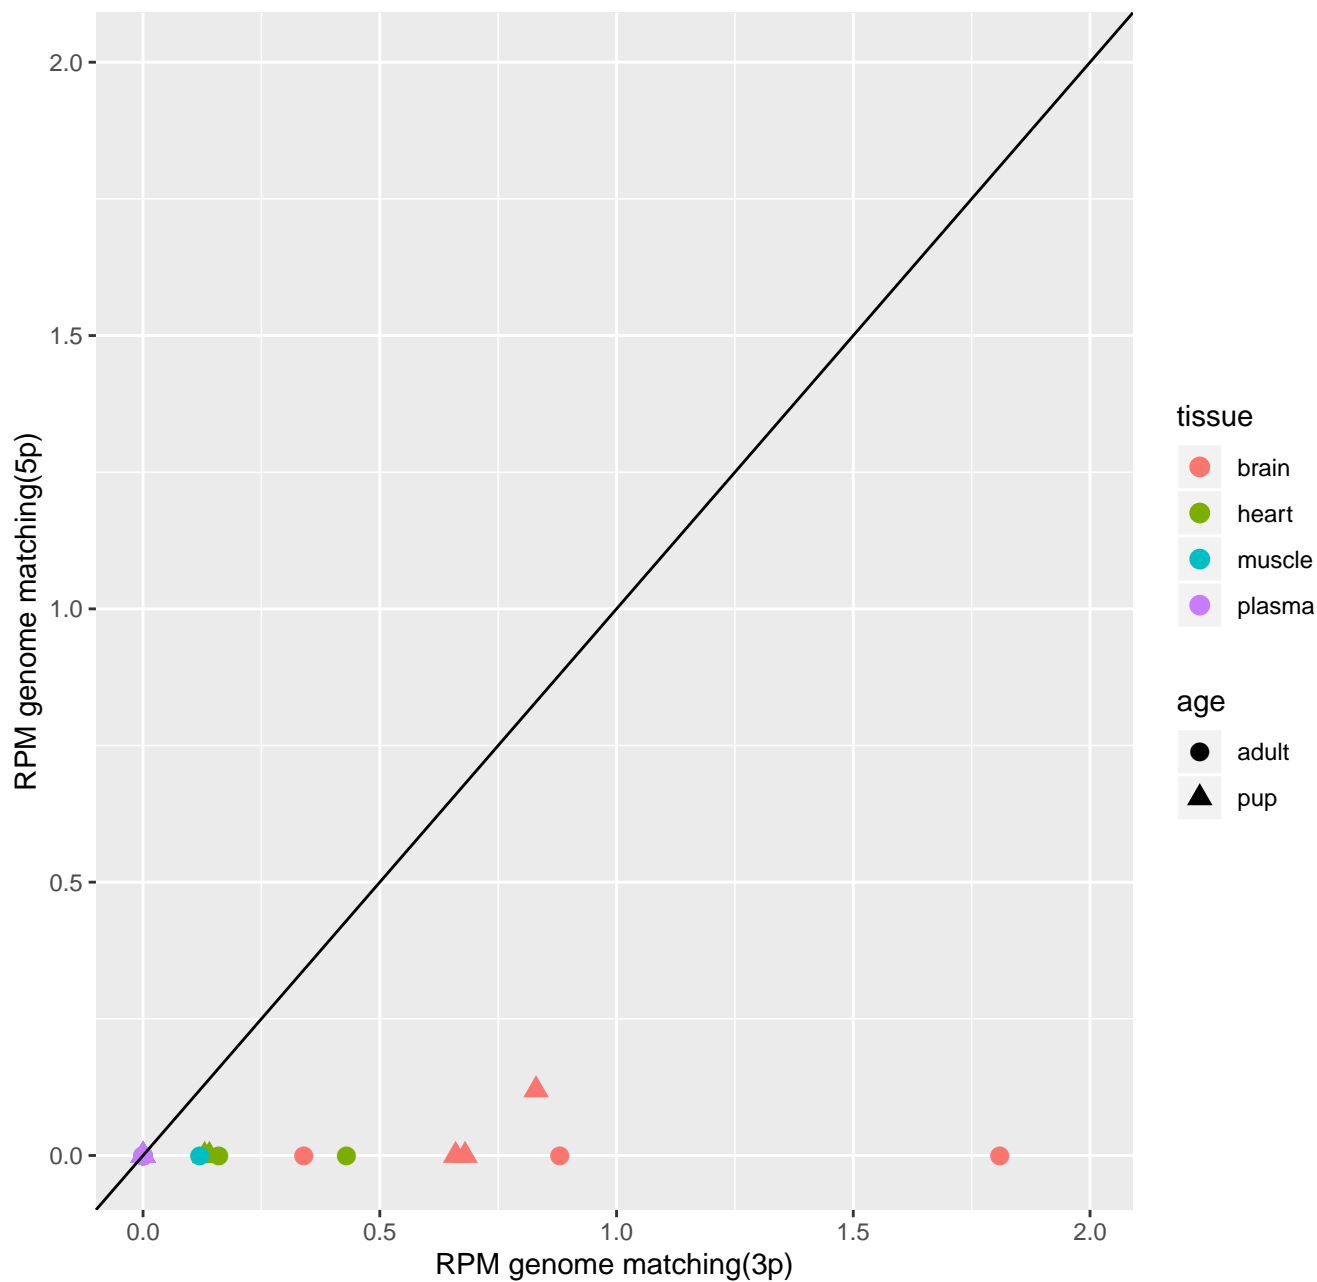

# WS\_miRDeep2\_novel\_89



## lwe-miR-3065;lwe-miR-338\_loc1"

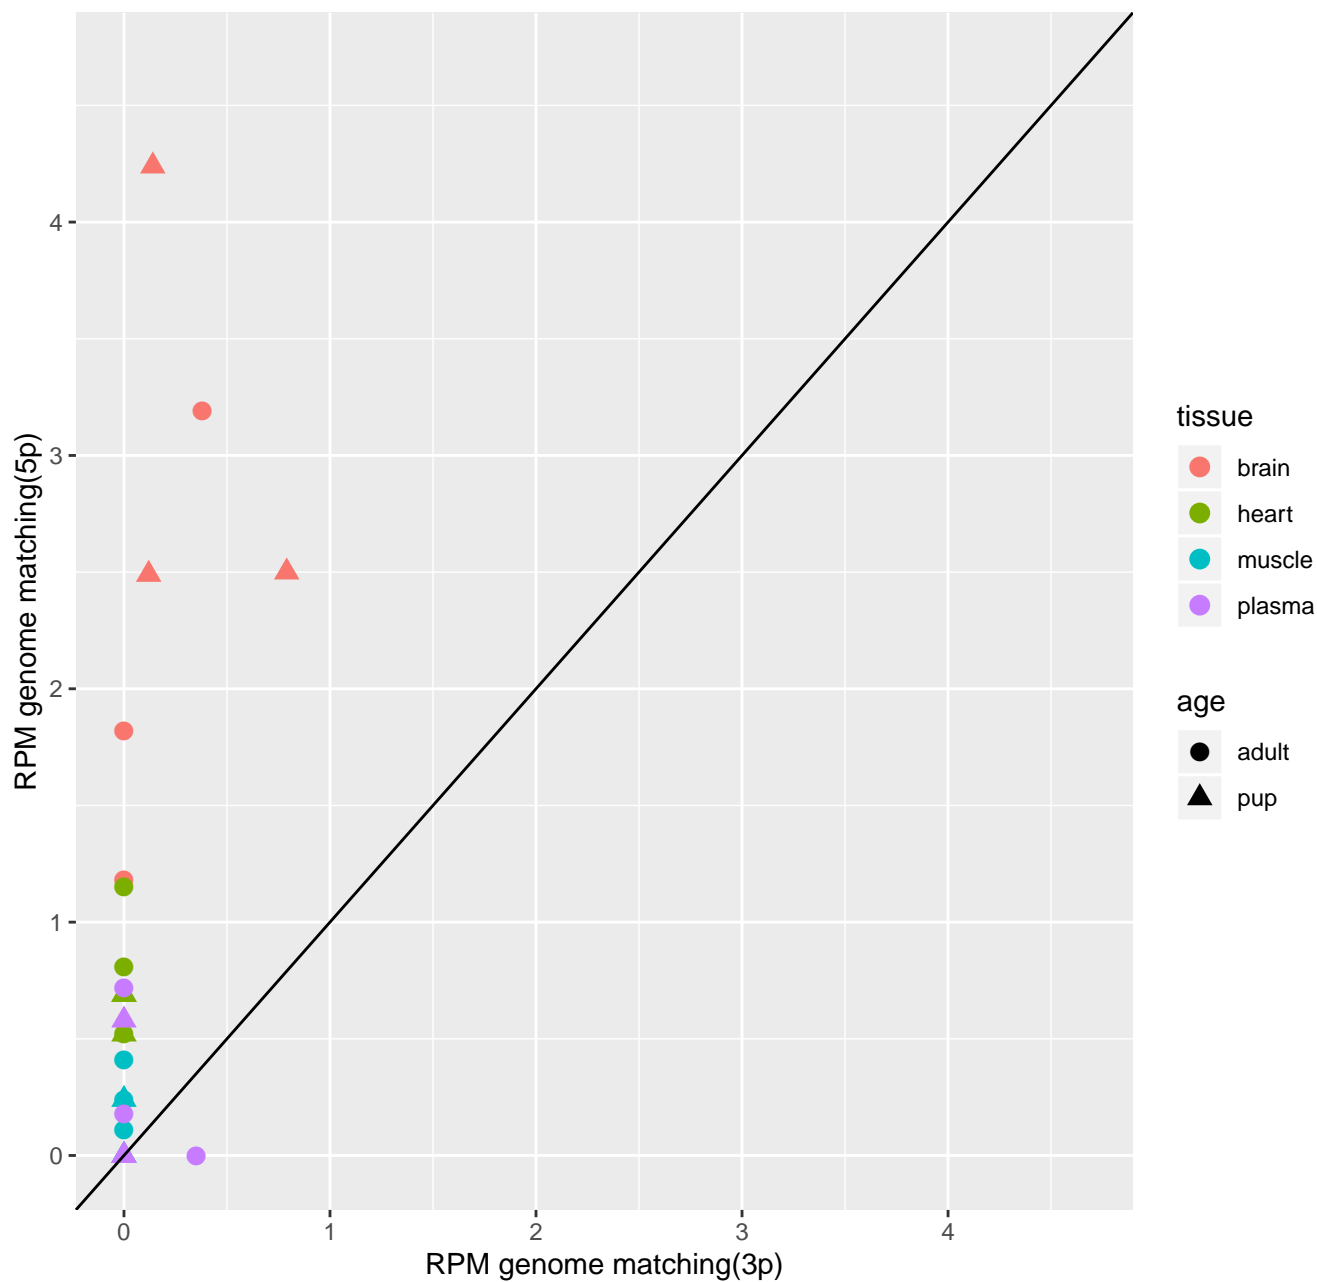



## lwe-miR-652\_miRDeep2\_loc1

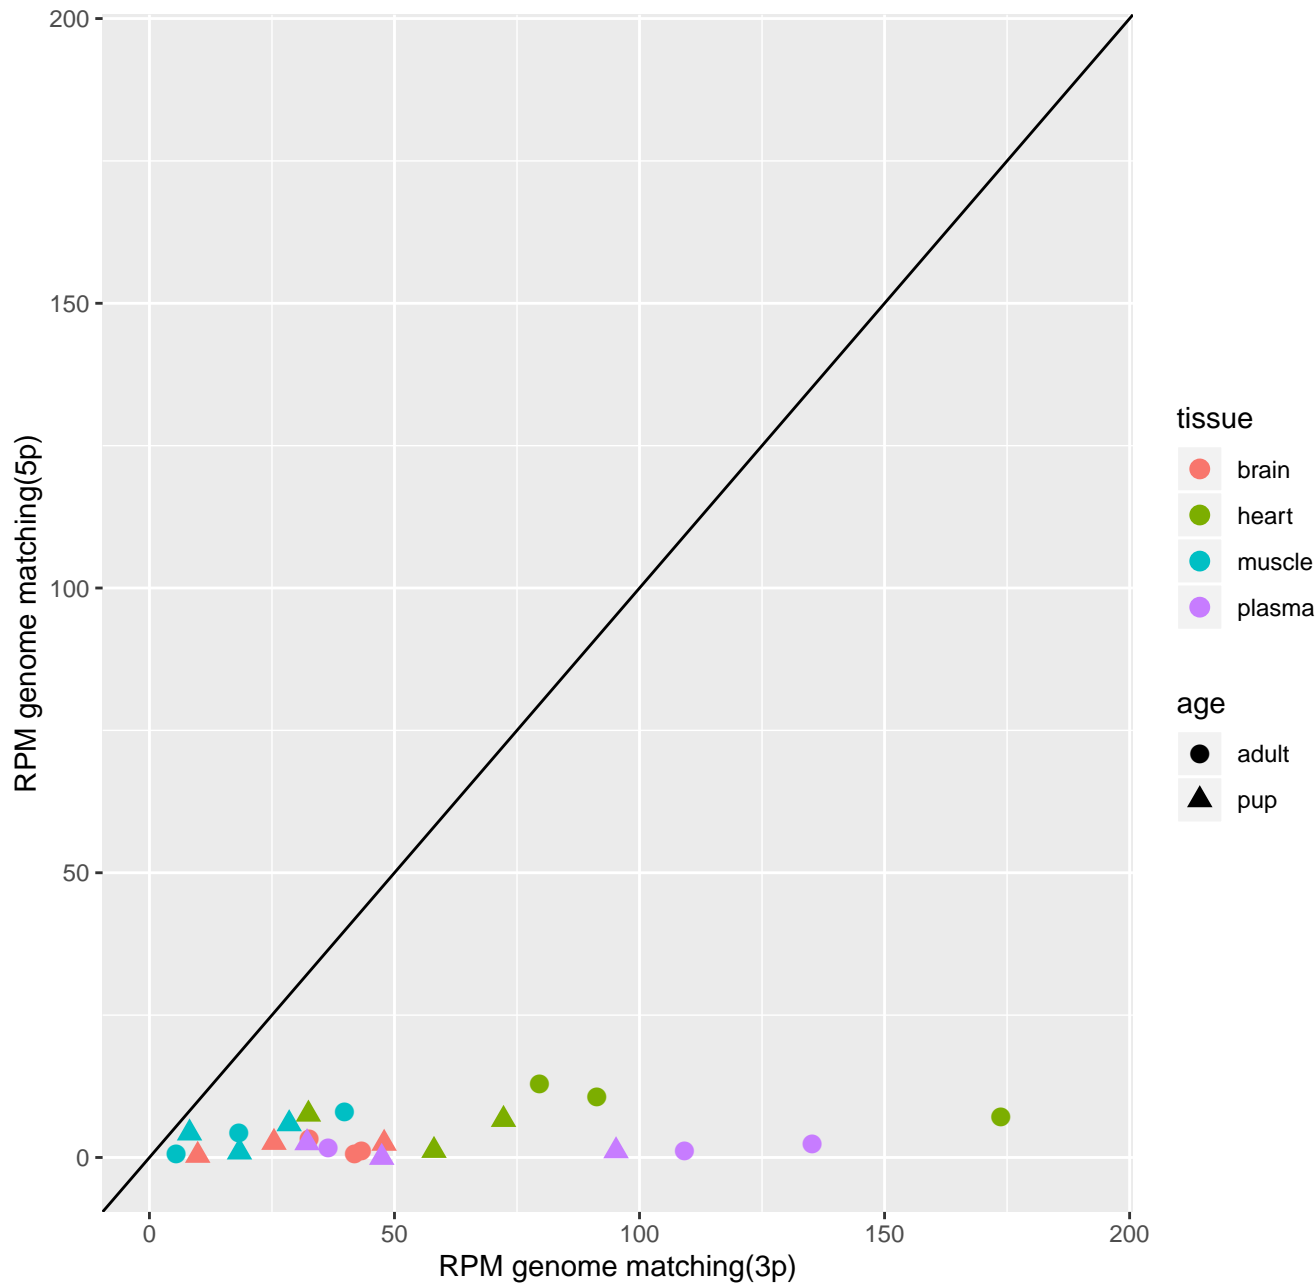

# lwe-miR-129\_loc2

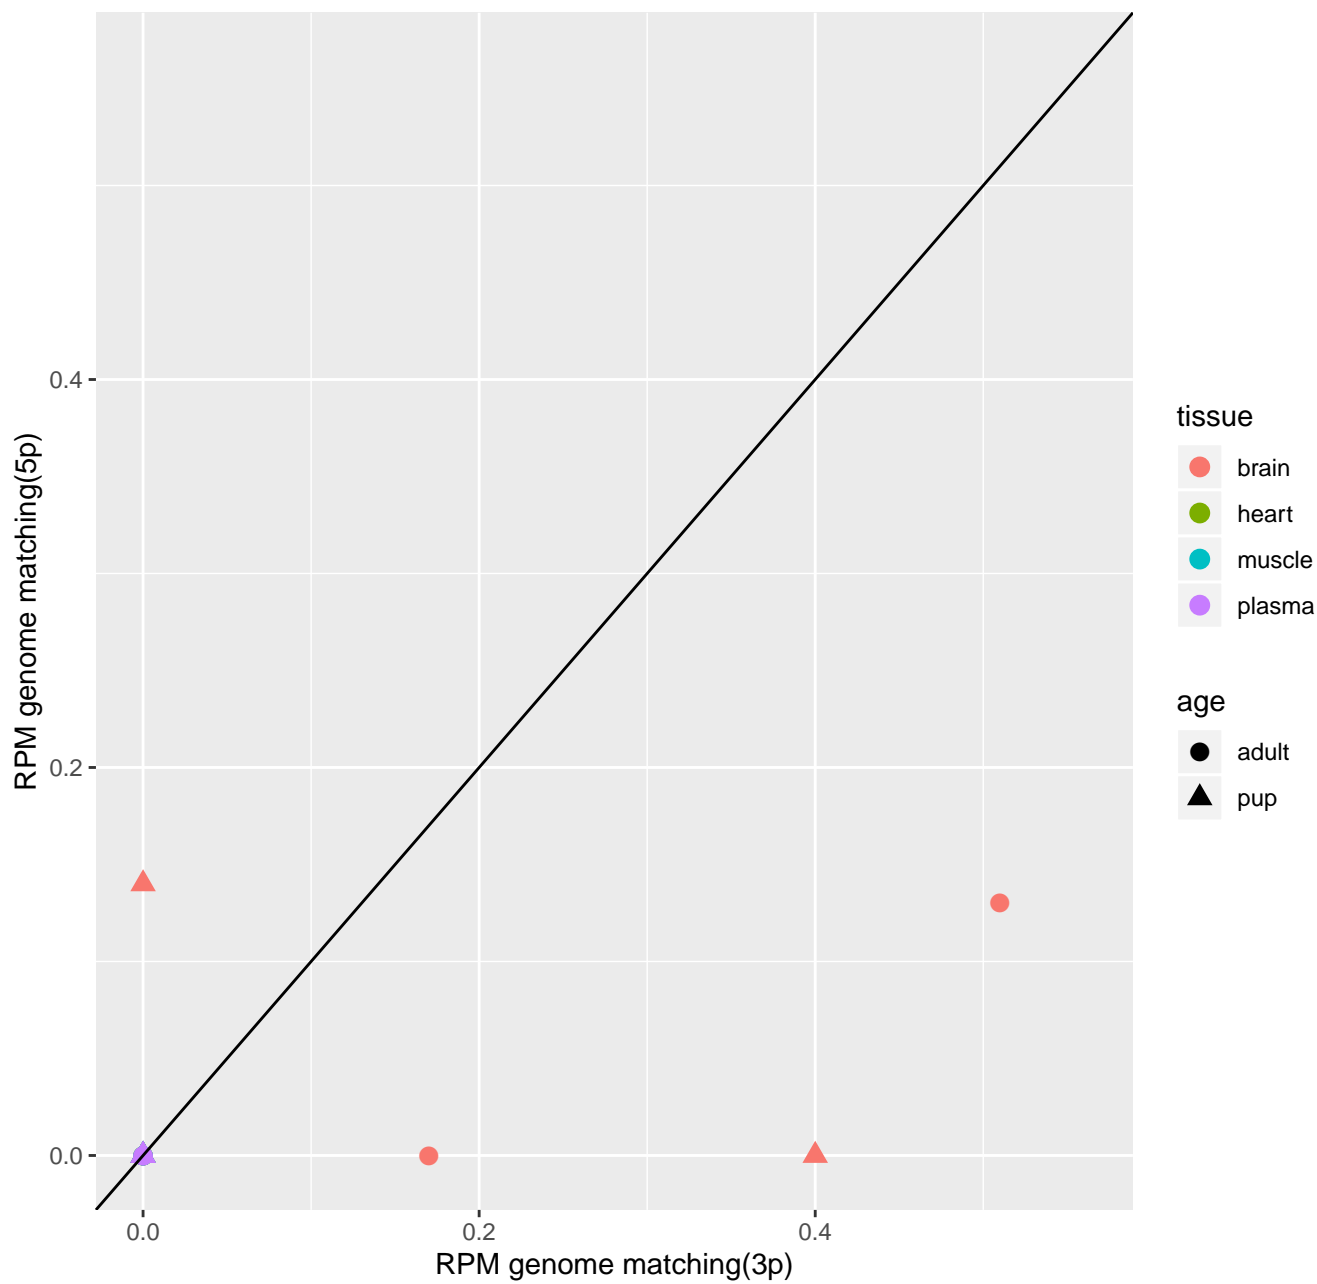

## lwe-miR-342\_miRDeep2\_loc1

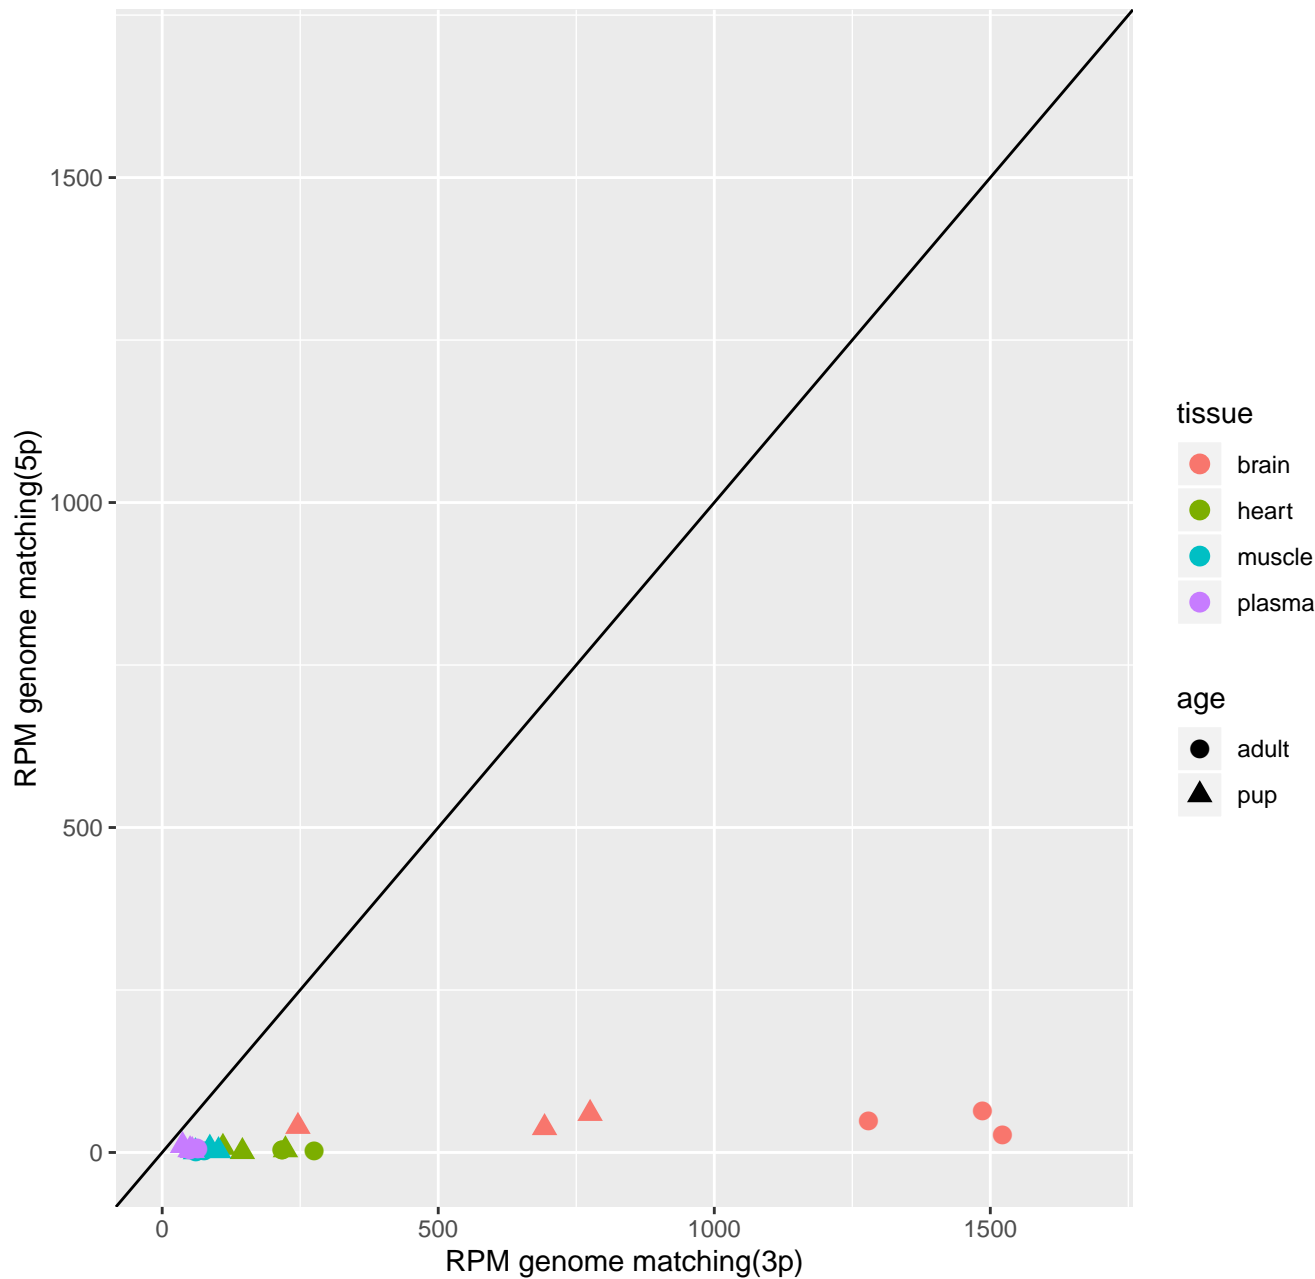

# WS\_miRDeep2\_novel\_92

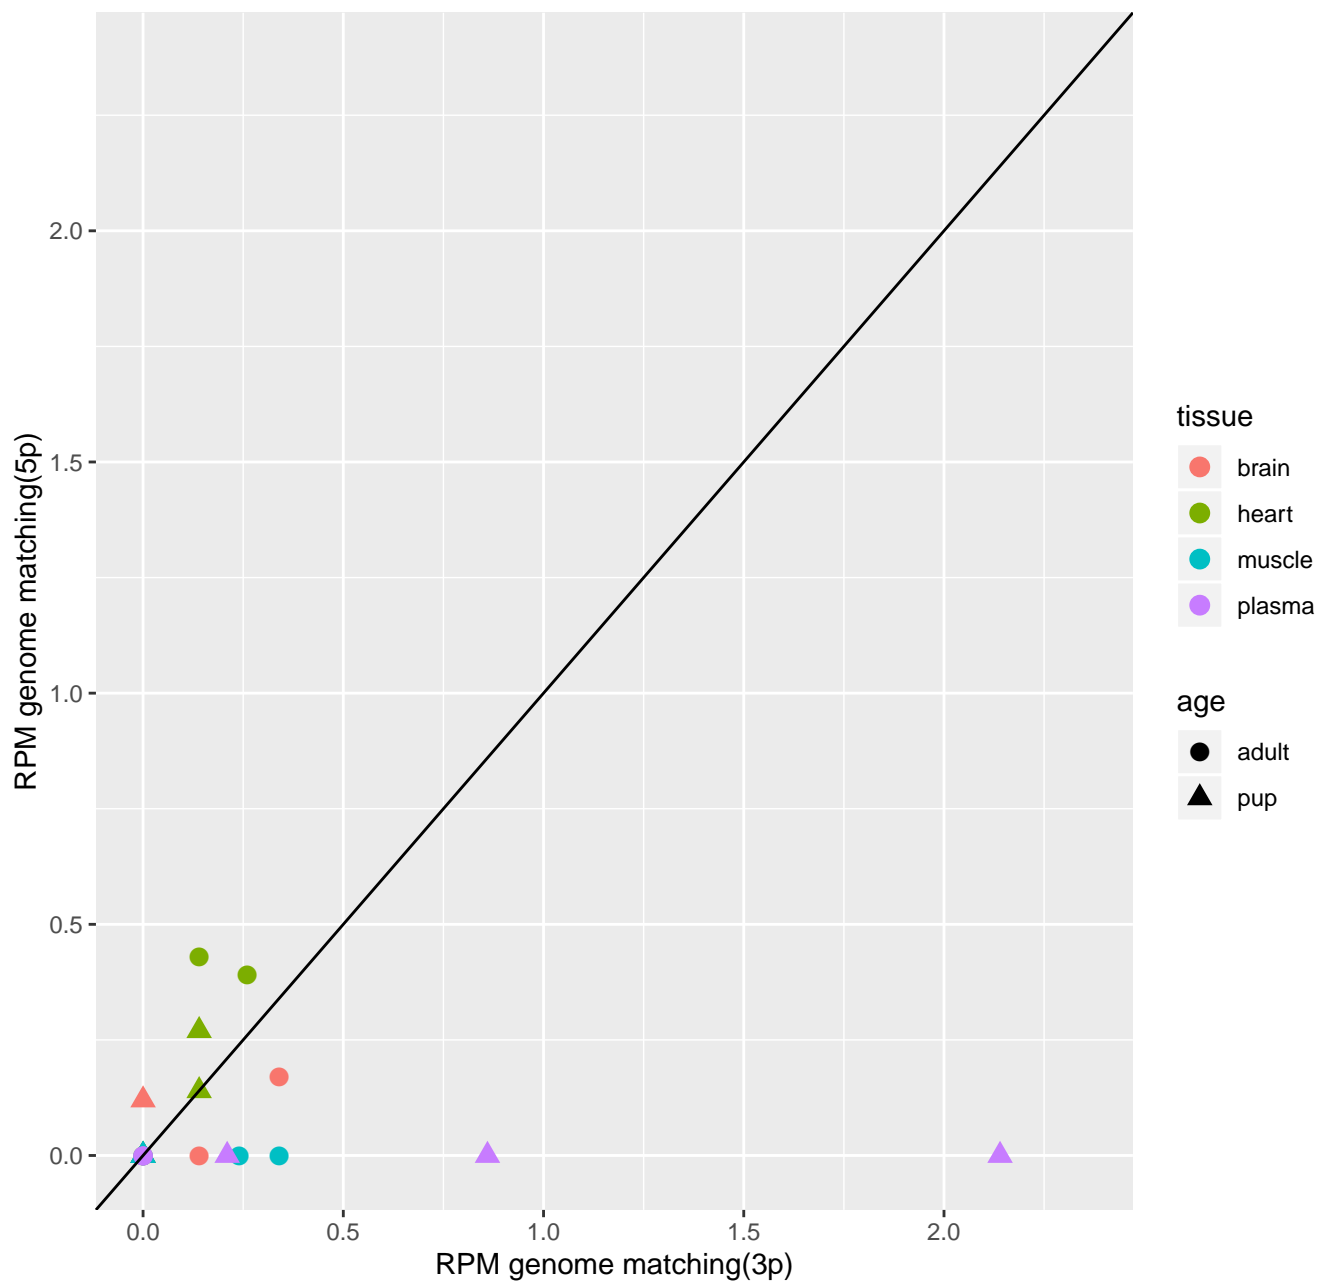

# WS\_miRDeep2\_novel\_93

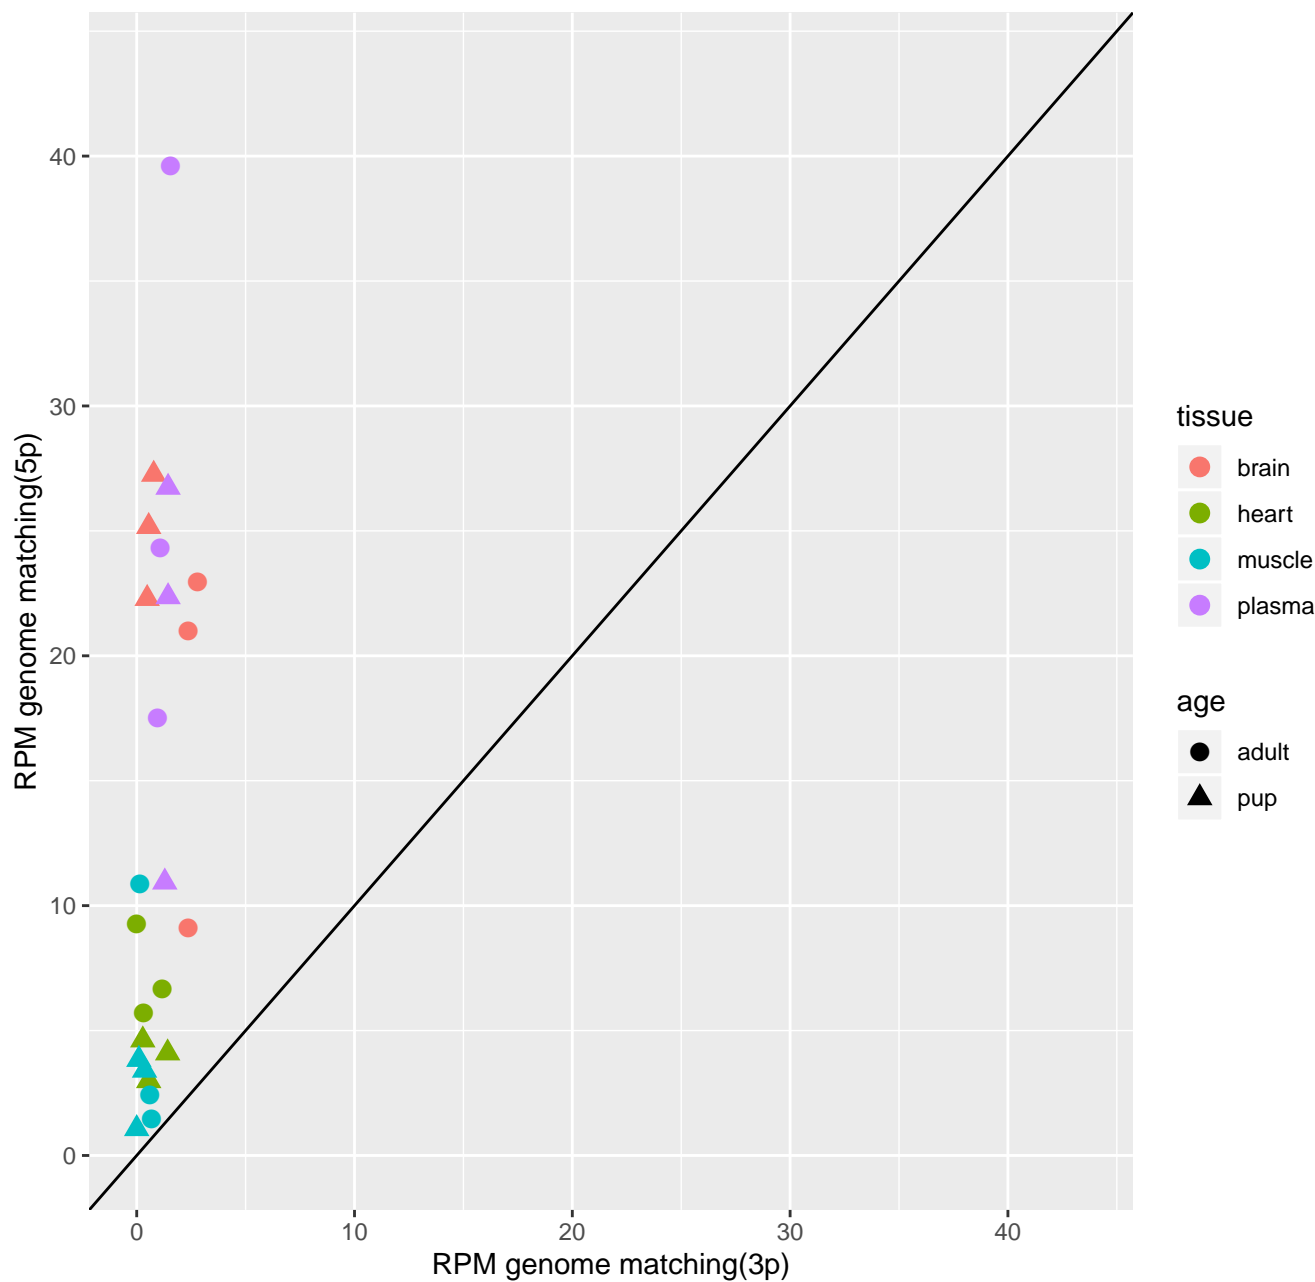

# WS\_miRDeep2\_novel\_94

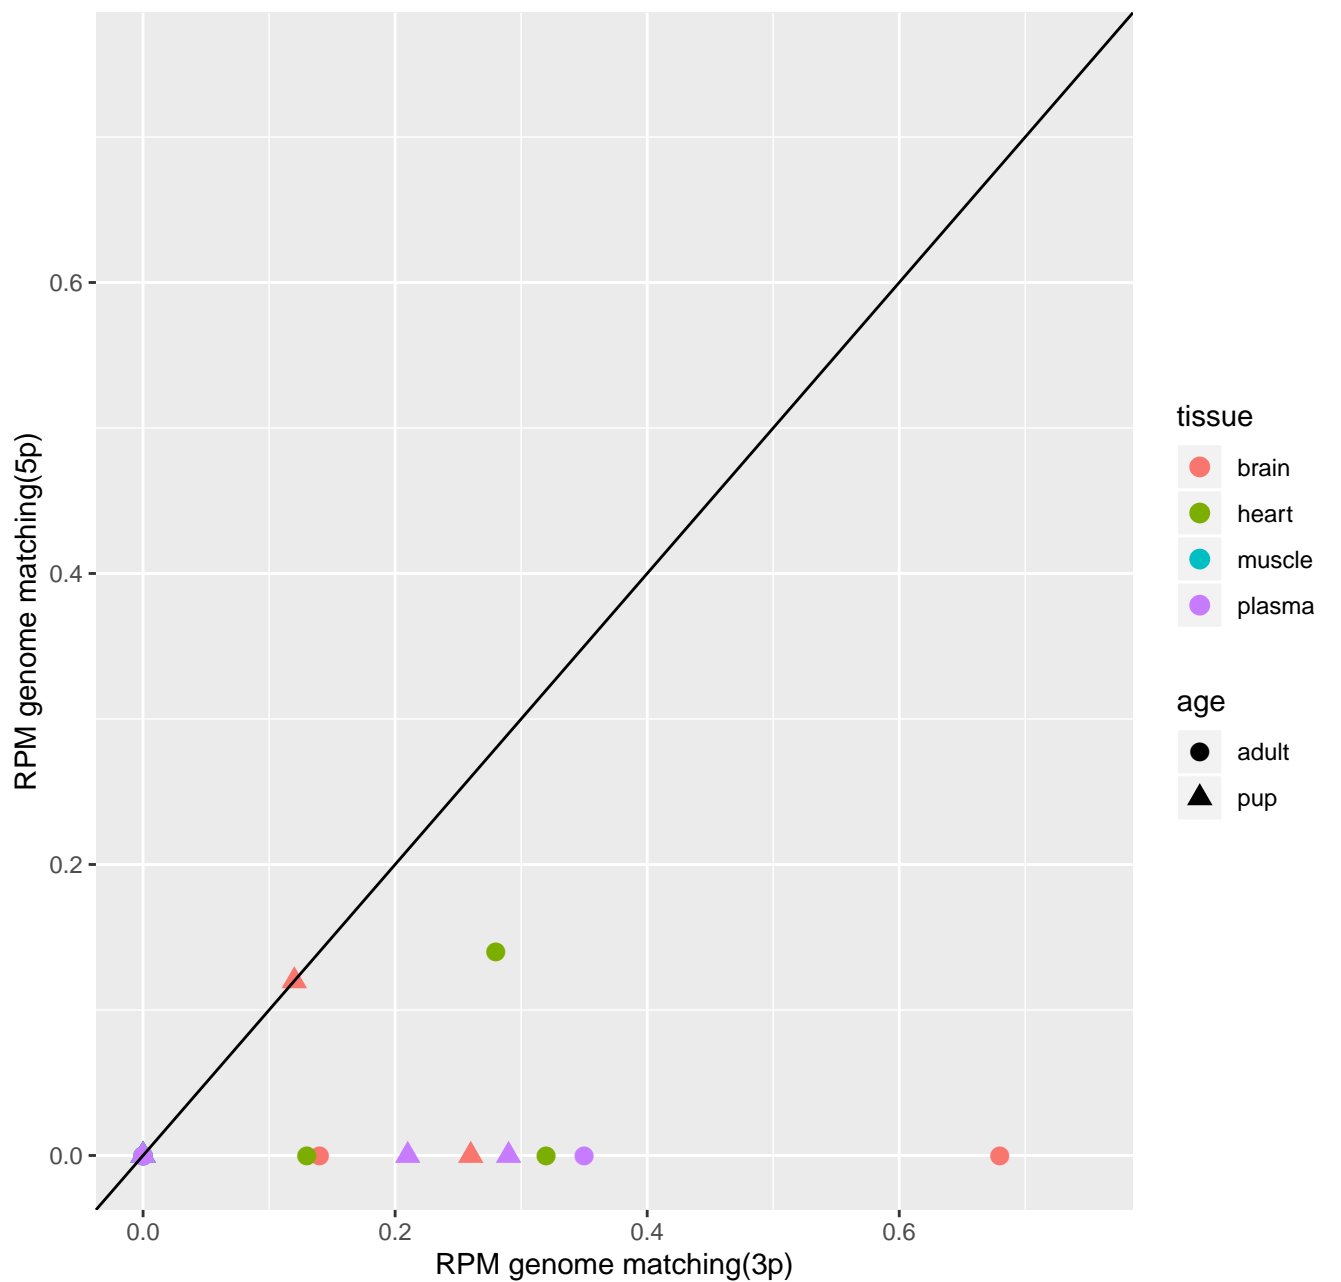

## lwe-miR-30d\_miRDeep2\_loc1

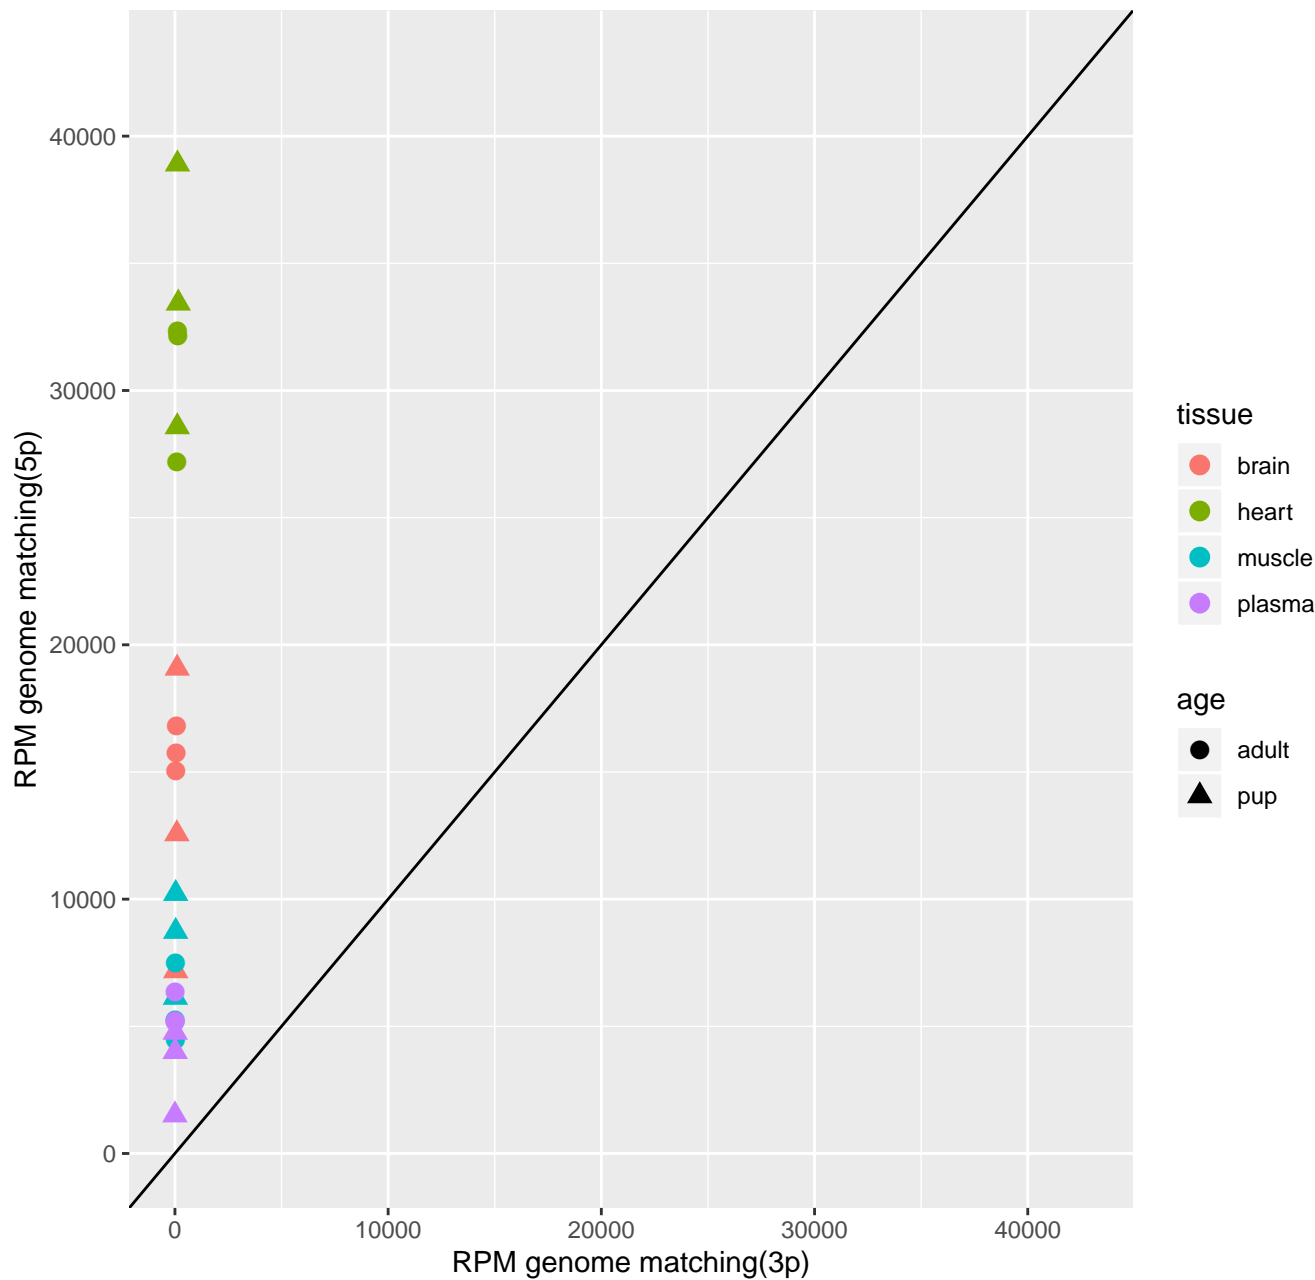

WS\_miRDeep2\_novel\_95

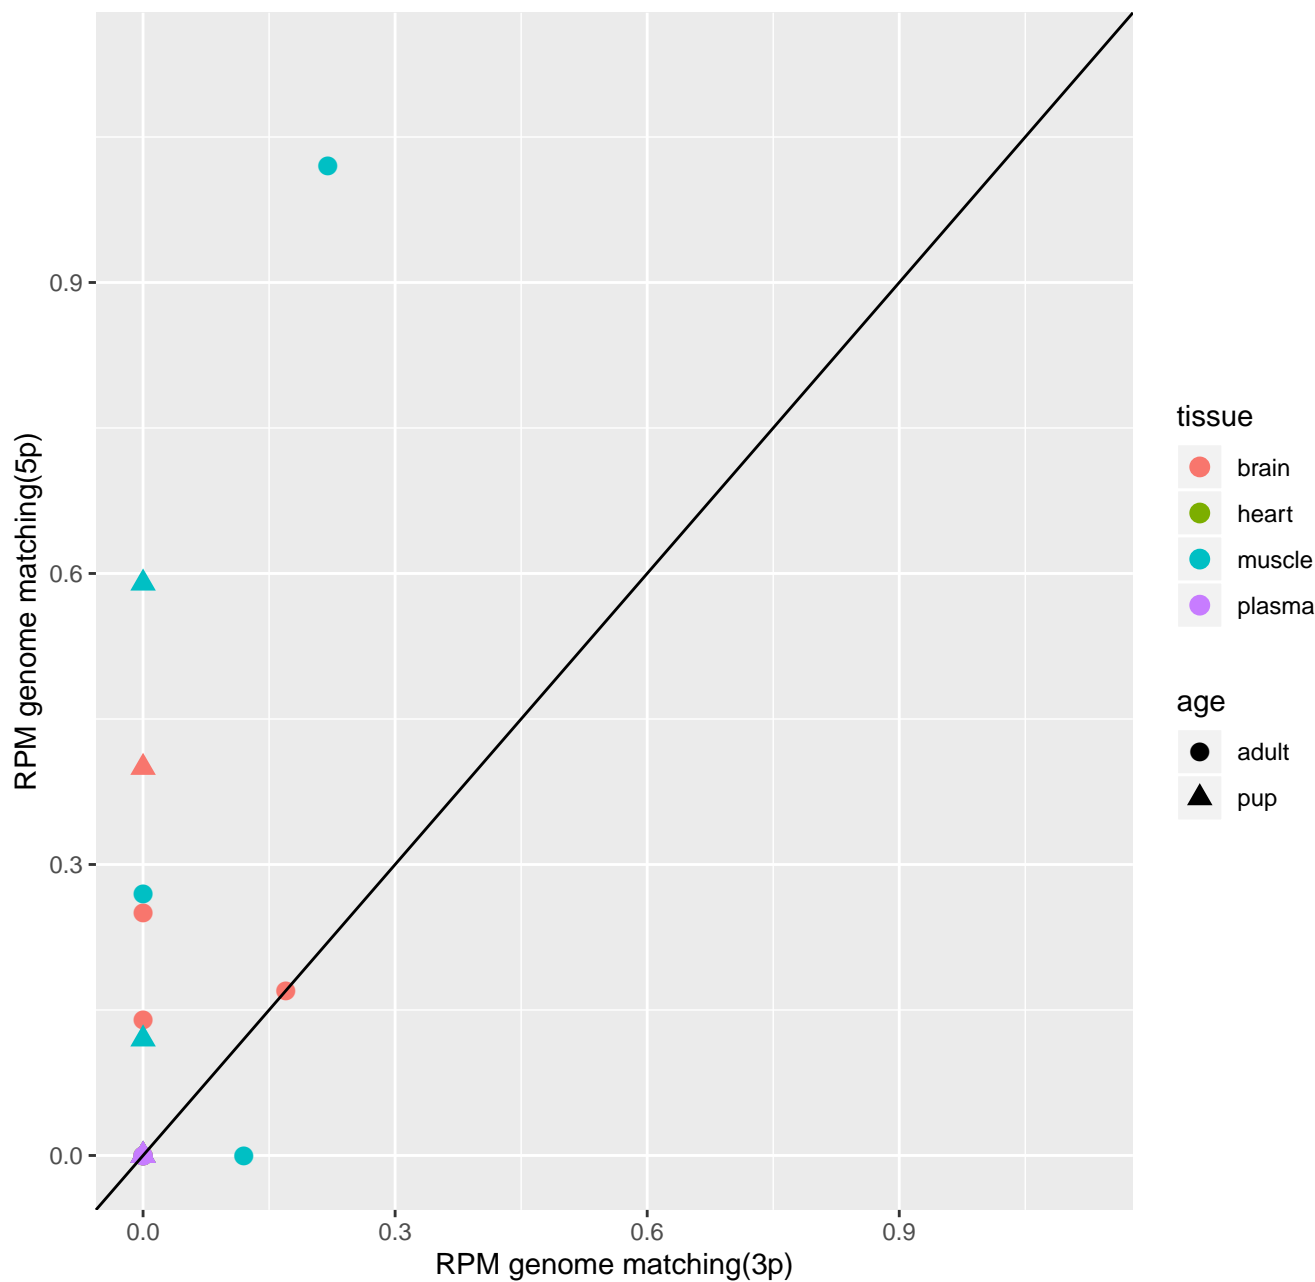



# lwe-miR-219\_loc1

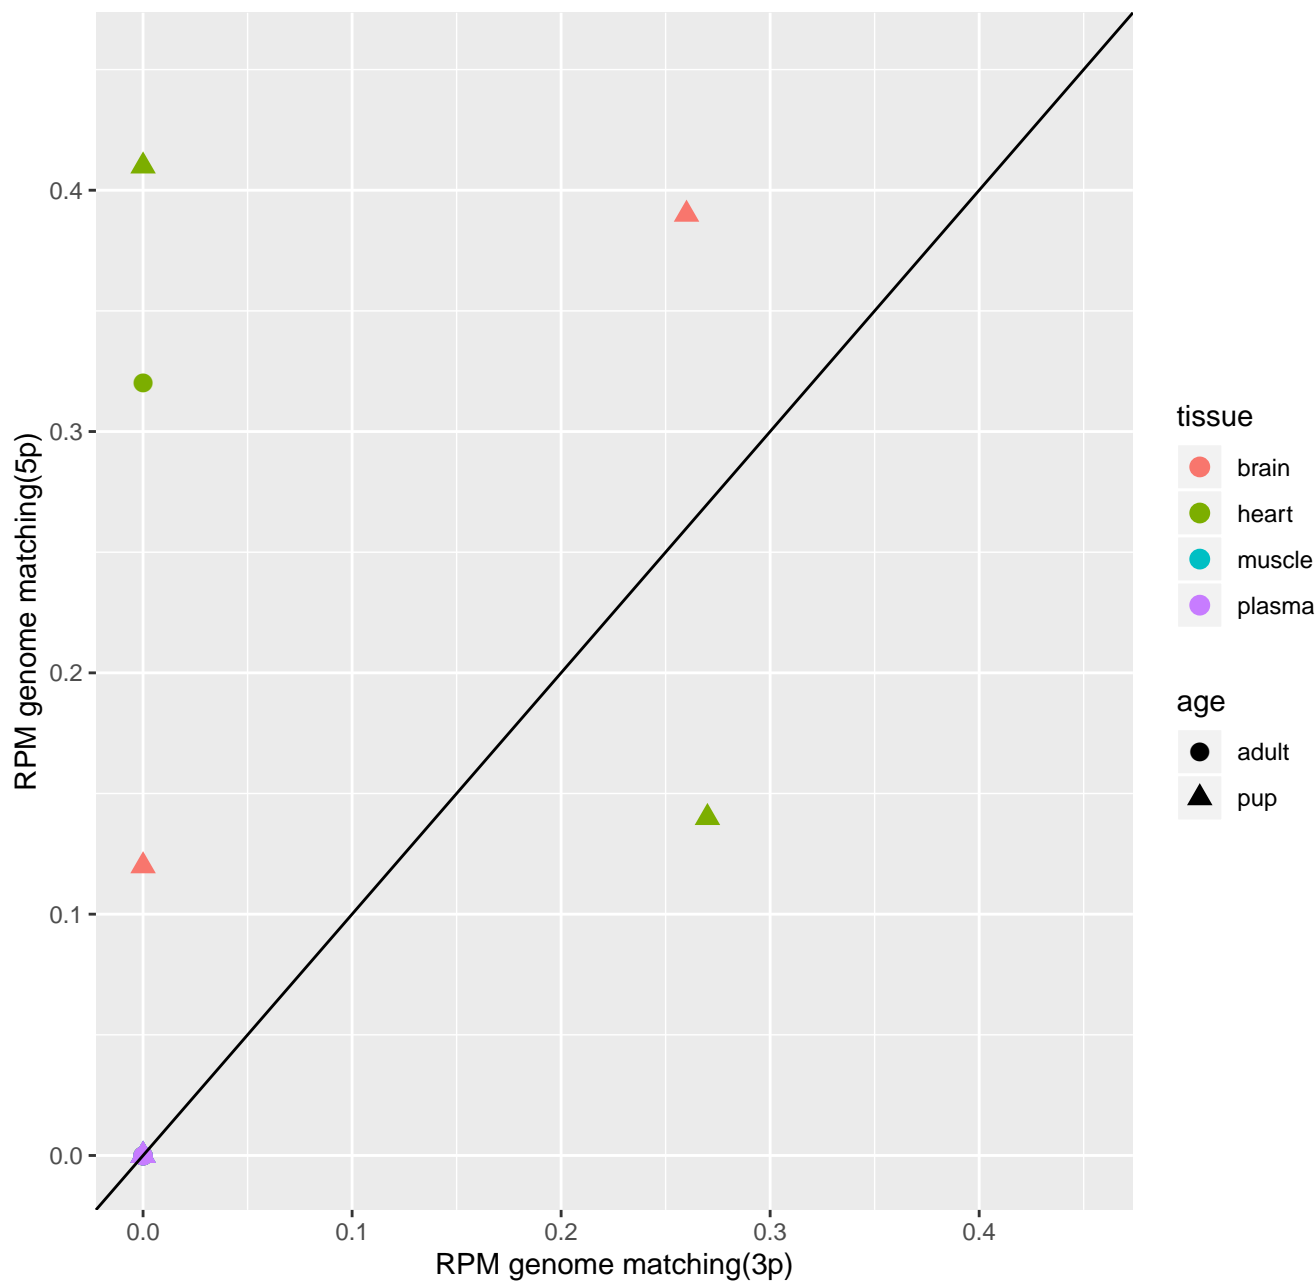

## WS\_miRDeep2\_novel\_97

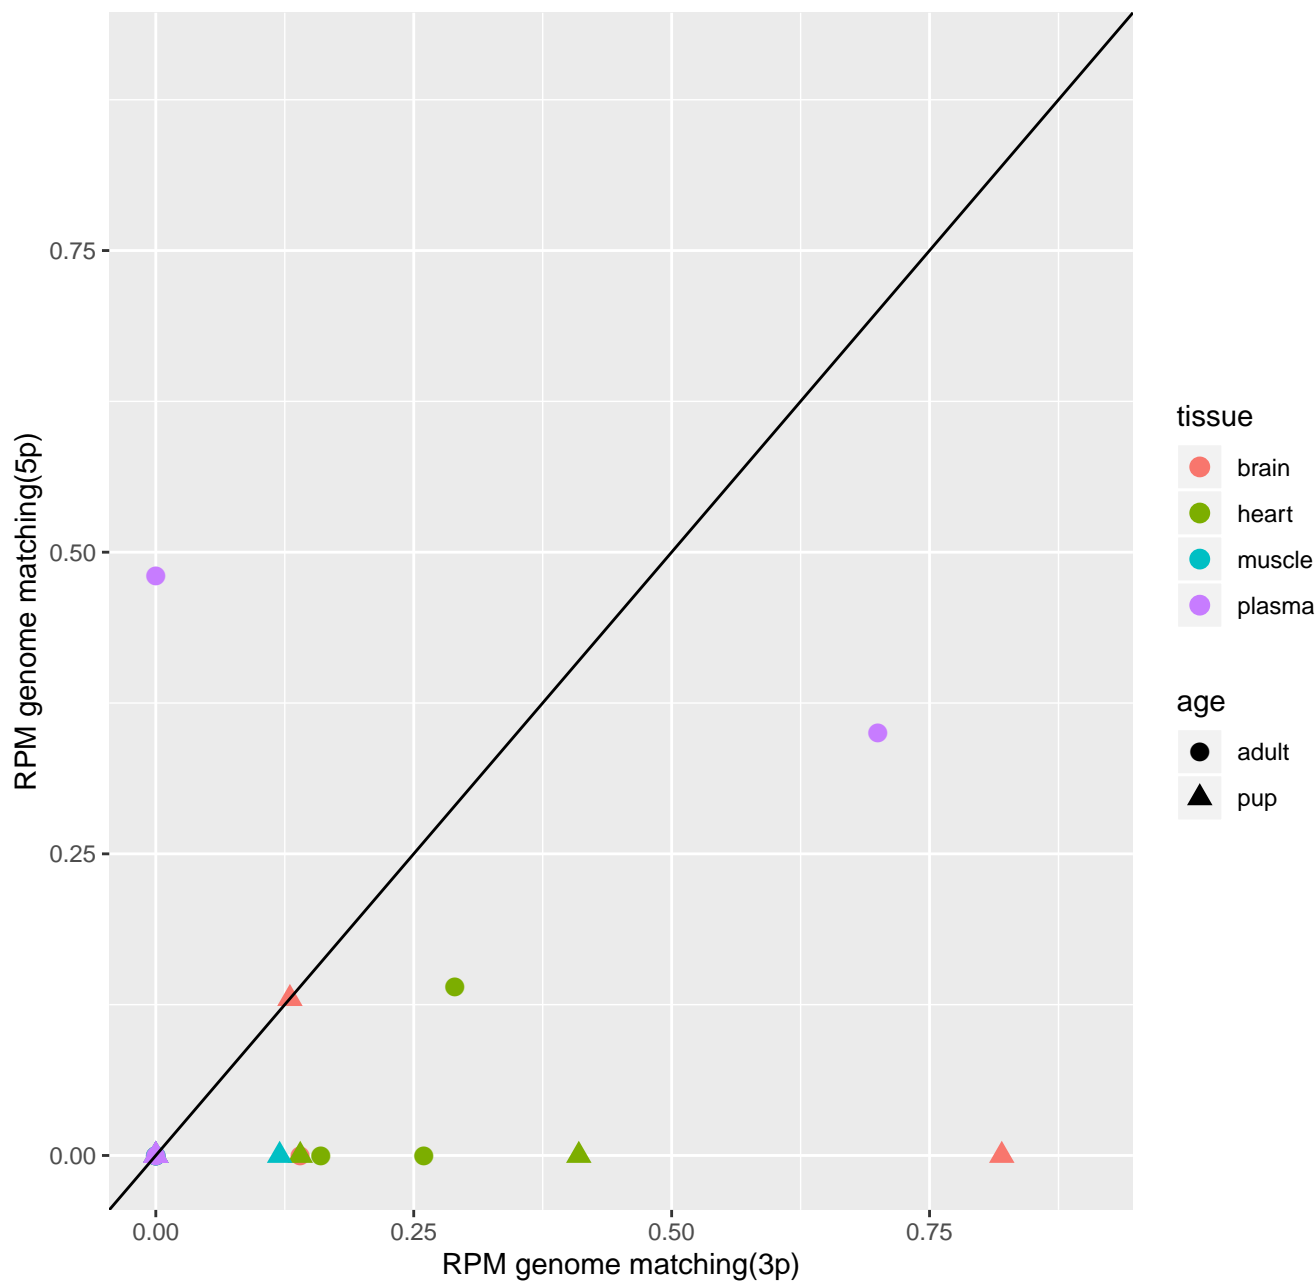

# WS\_miRDeep2\_novel\_98

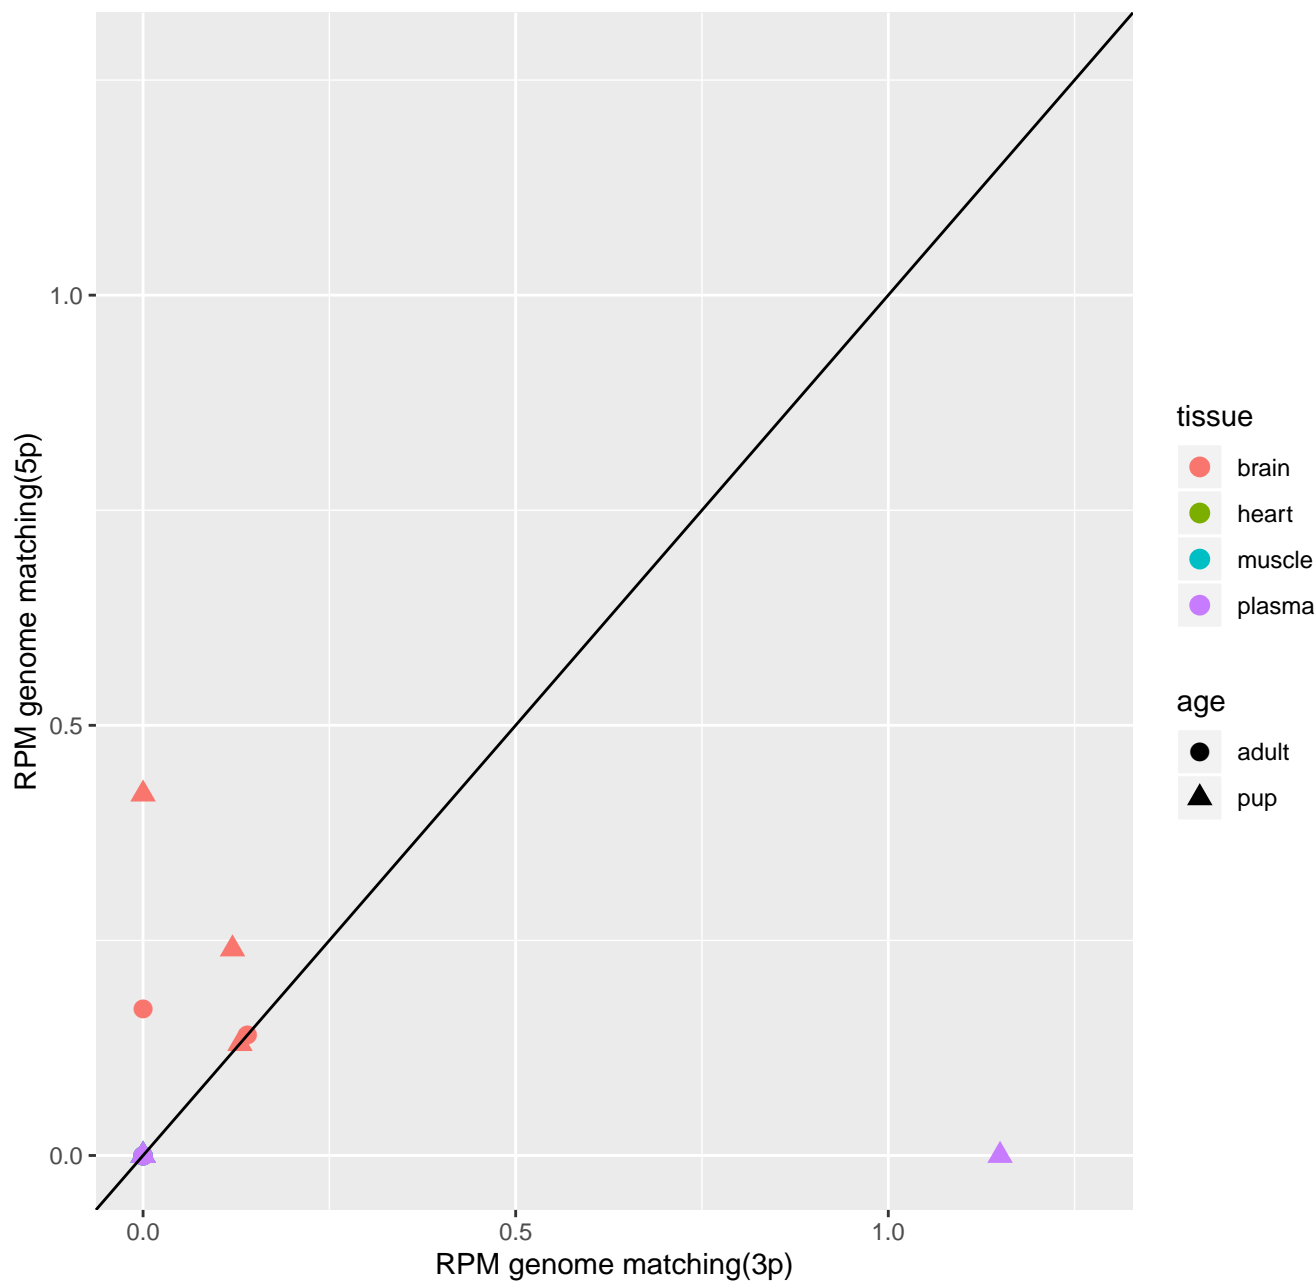

# WS\_miRDeep2\_novel\_99

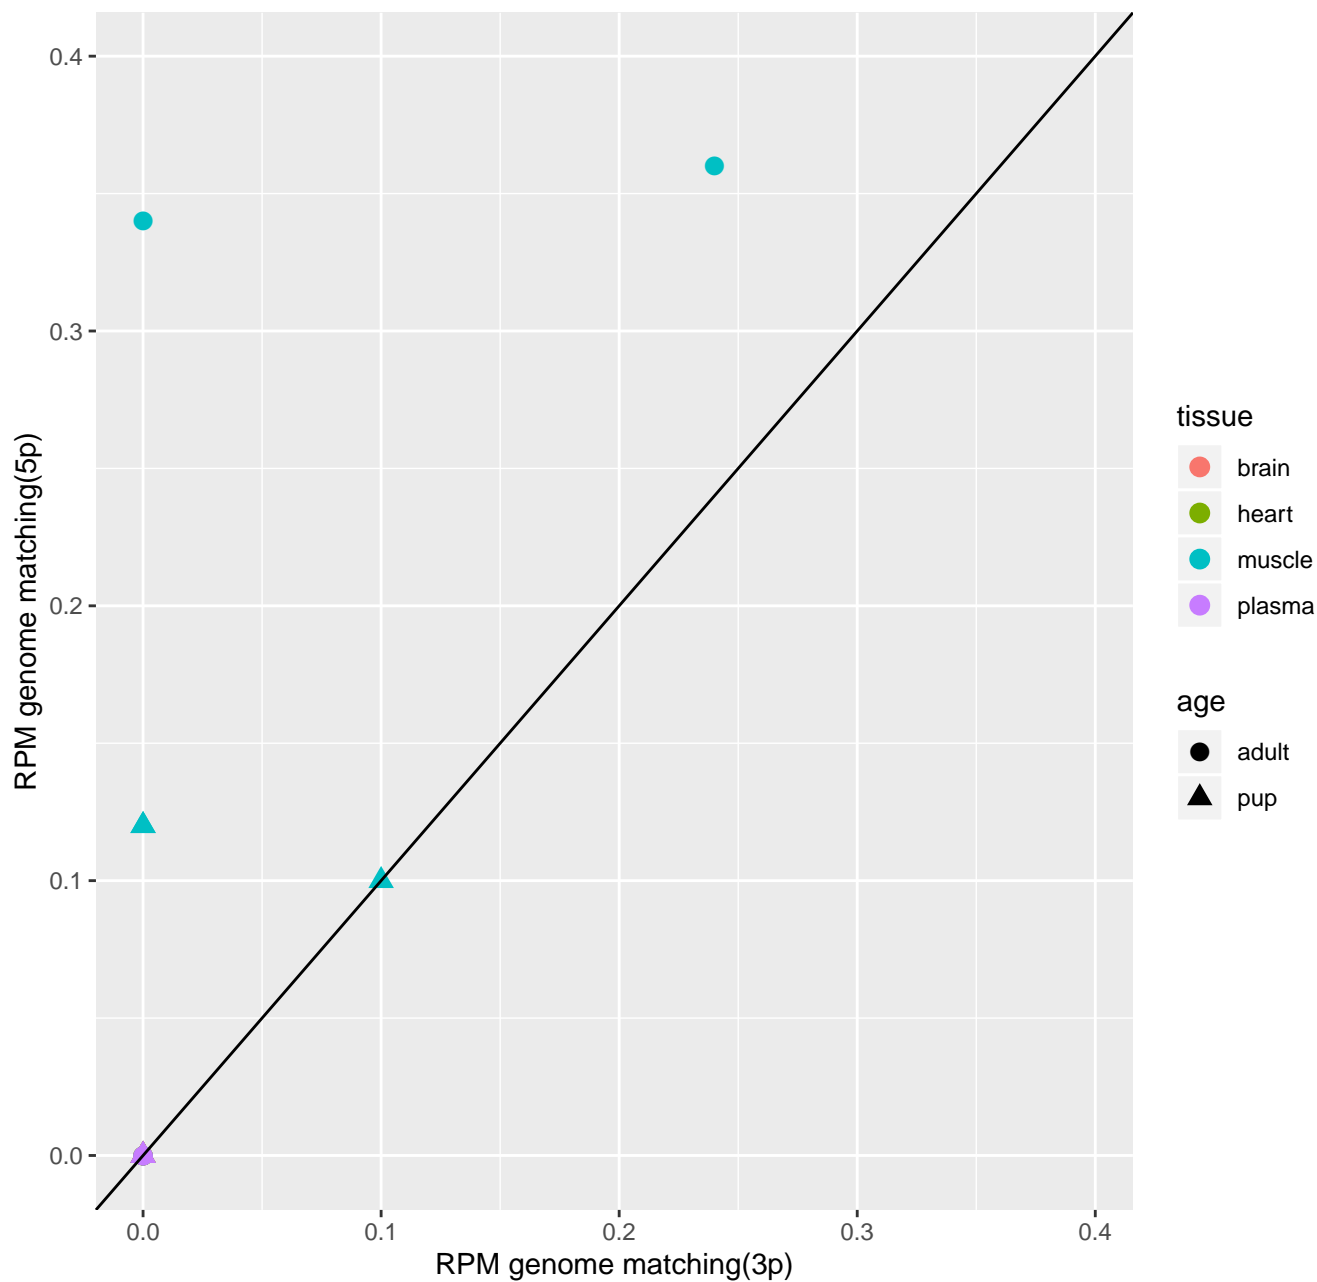

# WS\_miRDeep2\_novel\_100

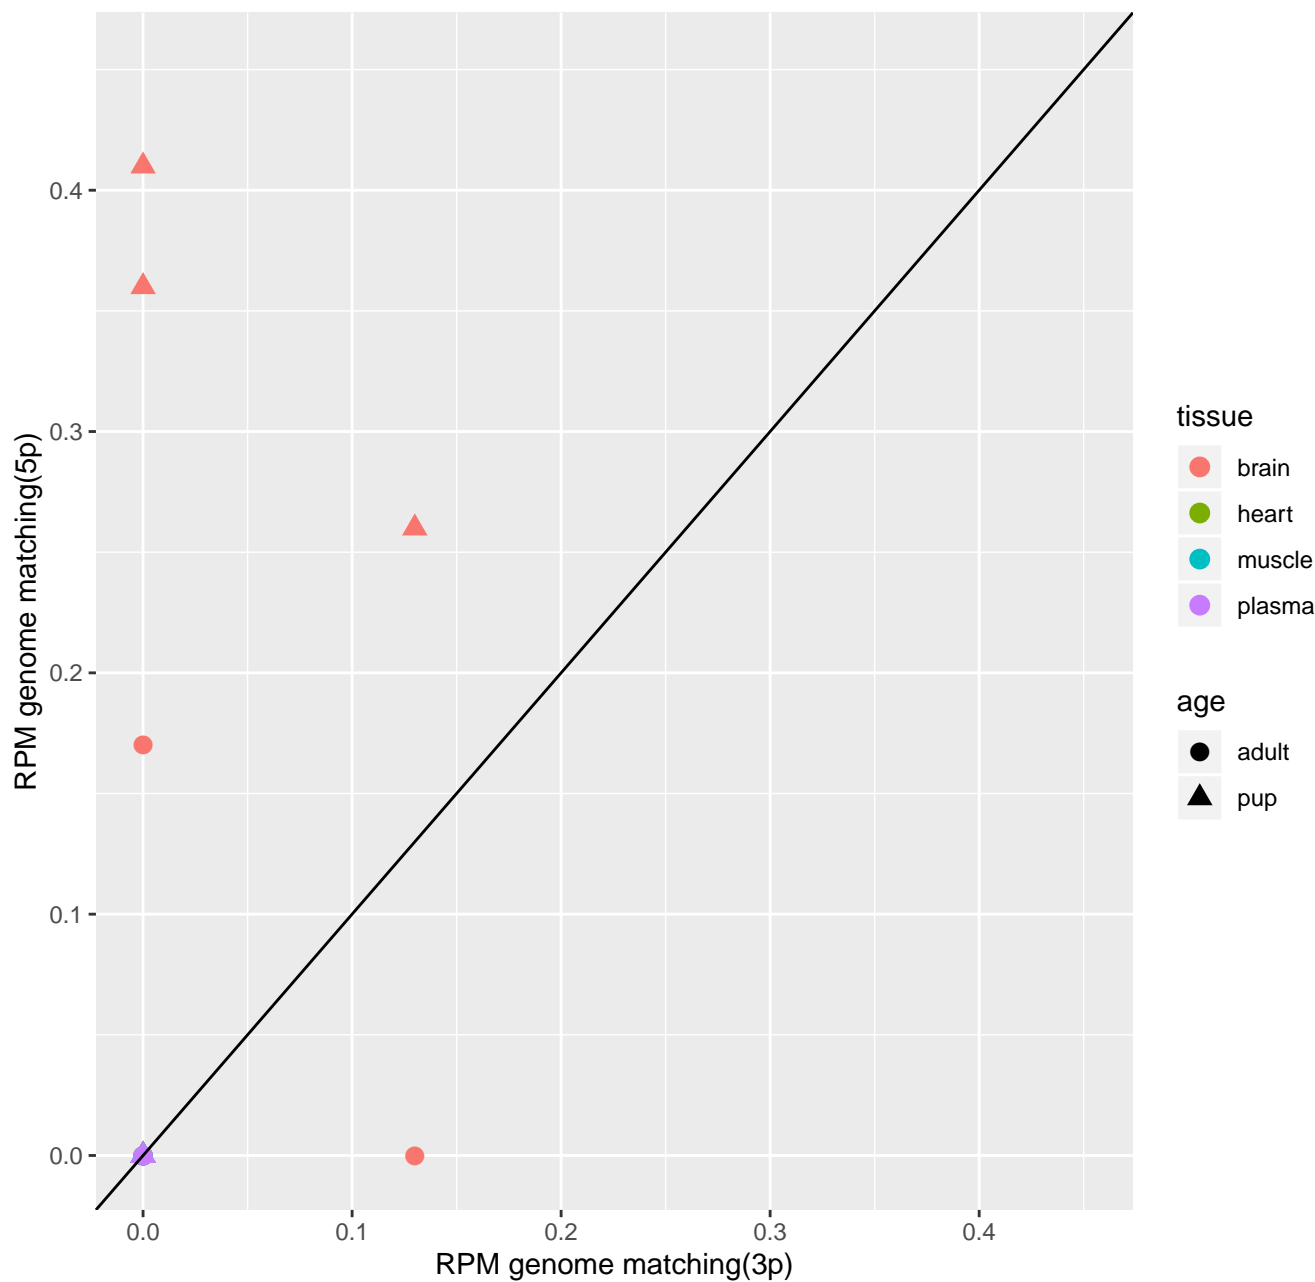

# WS\_miRDeep2\_novel\_101

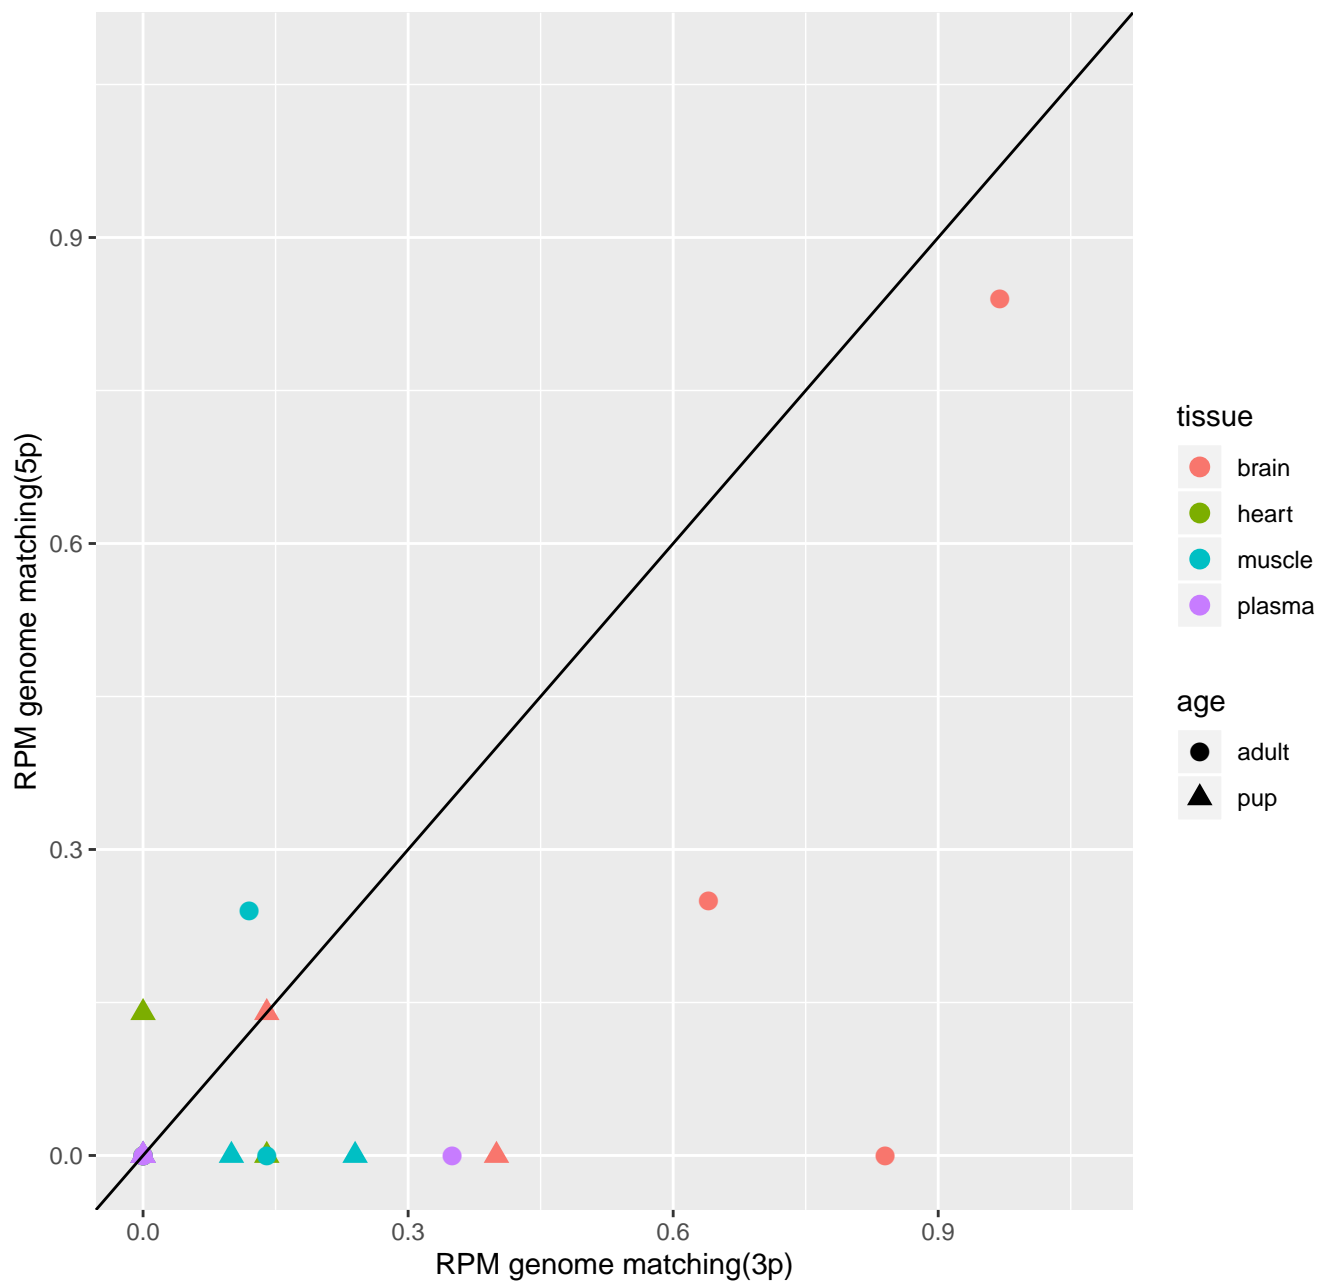

# WS\_miRDeep2\_novel\_102

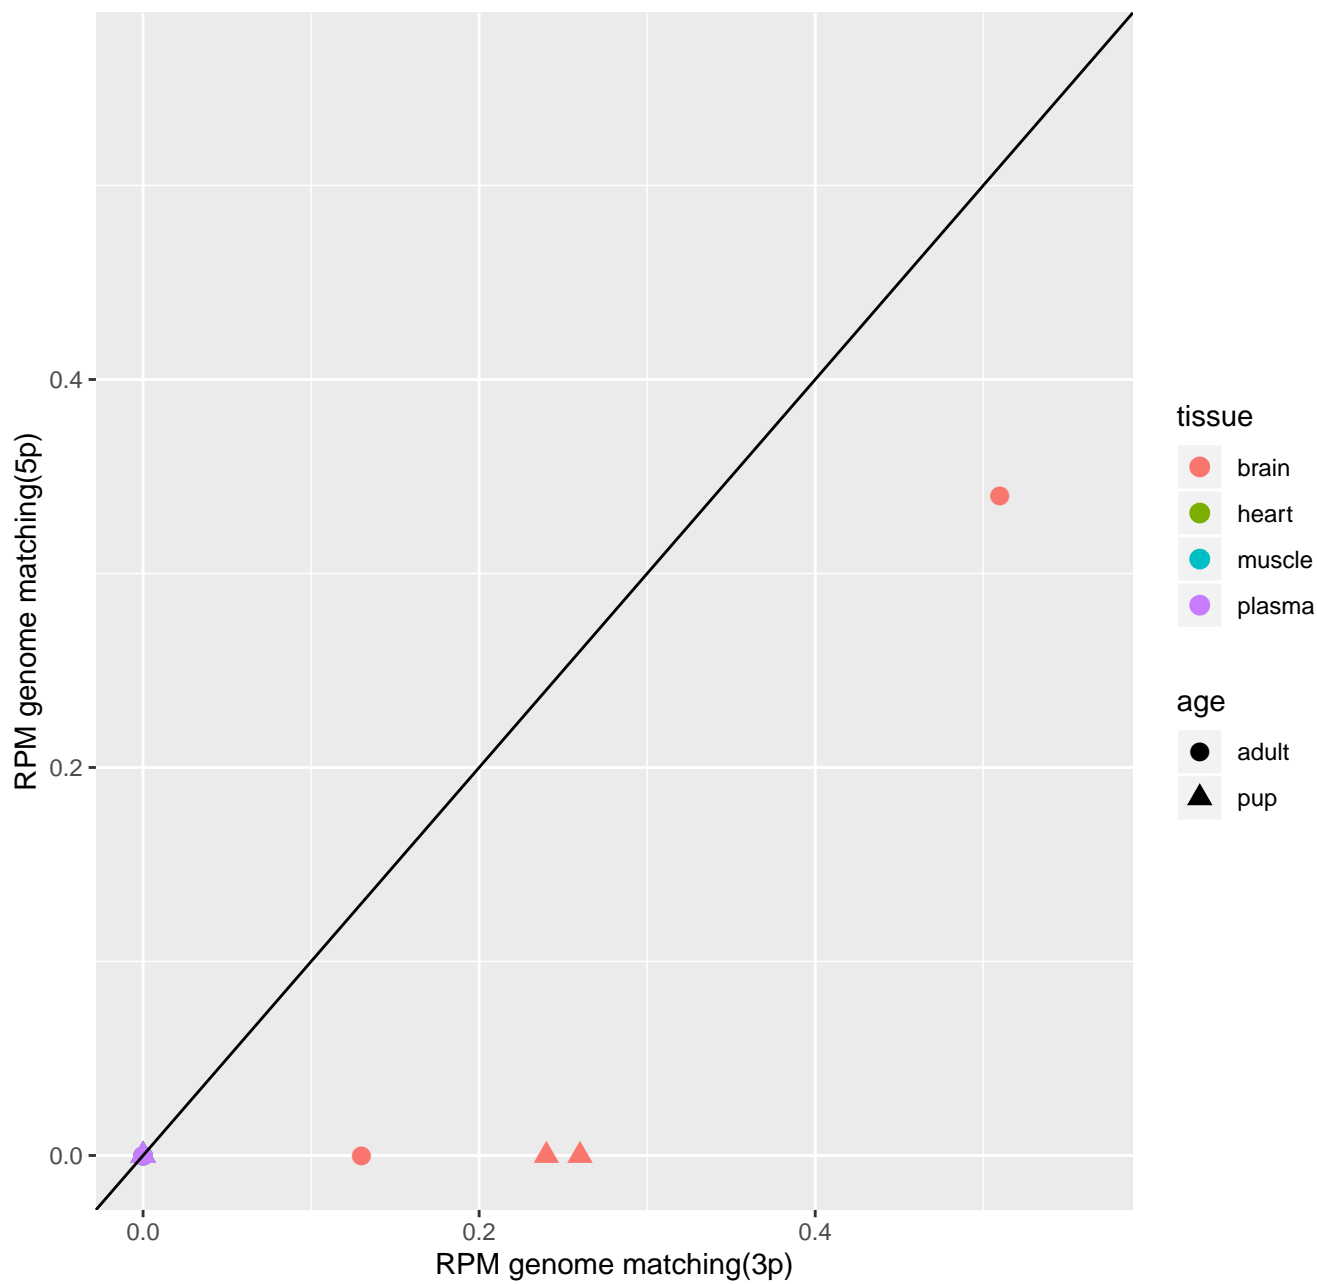

## lwe-miR-299\_loc1

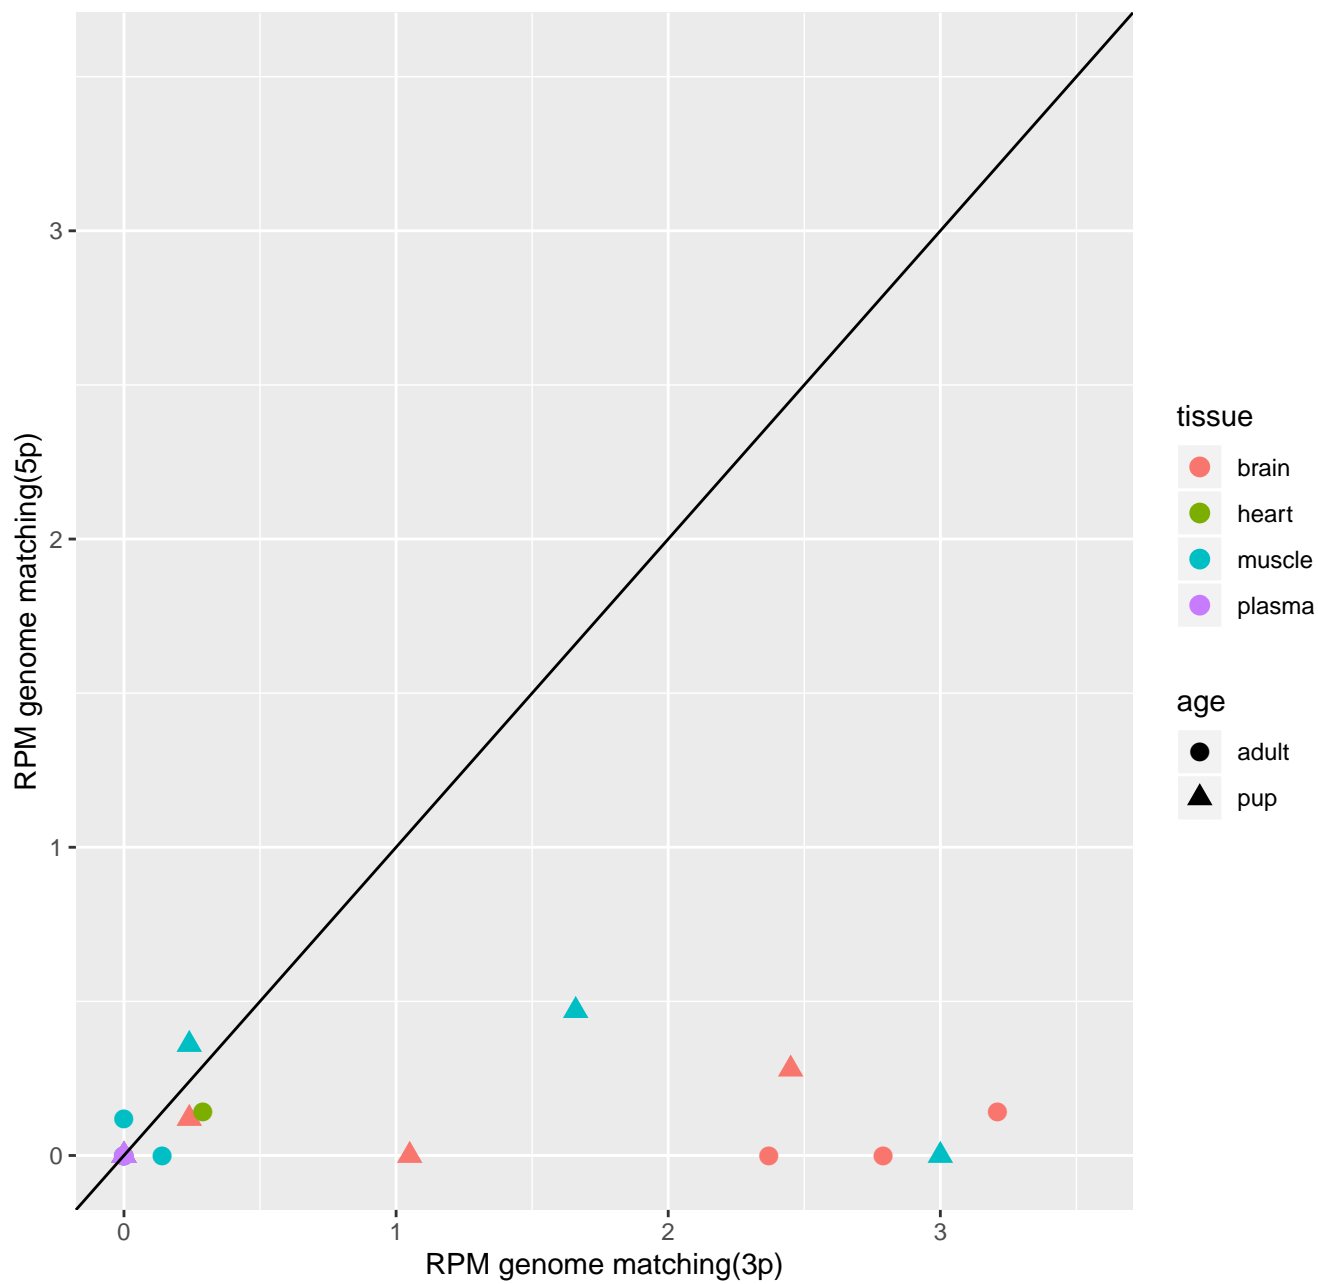



## lwe-miR-668\_loc1

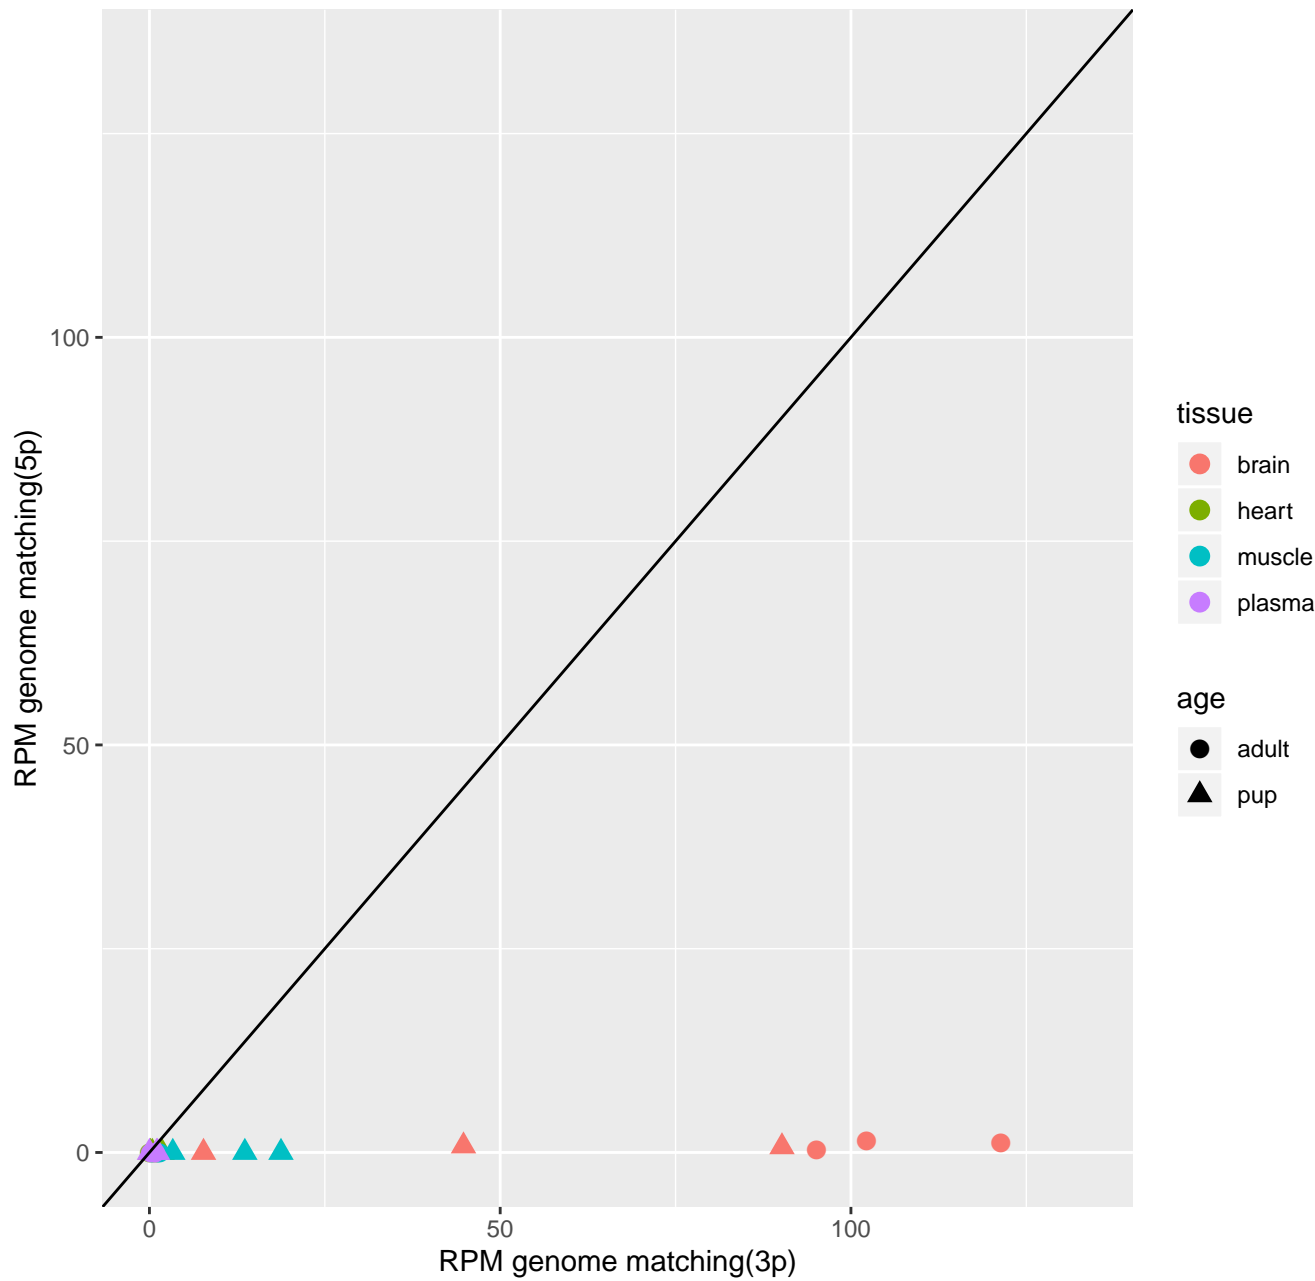

## lwe-miR-654\_loc1

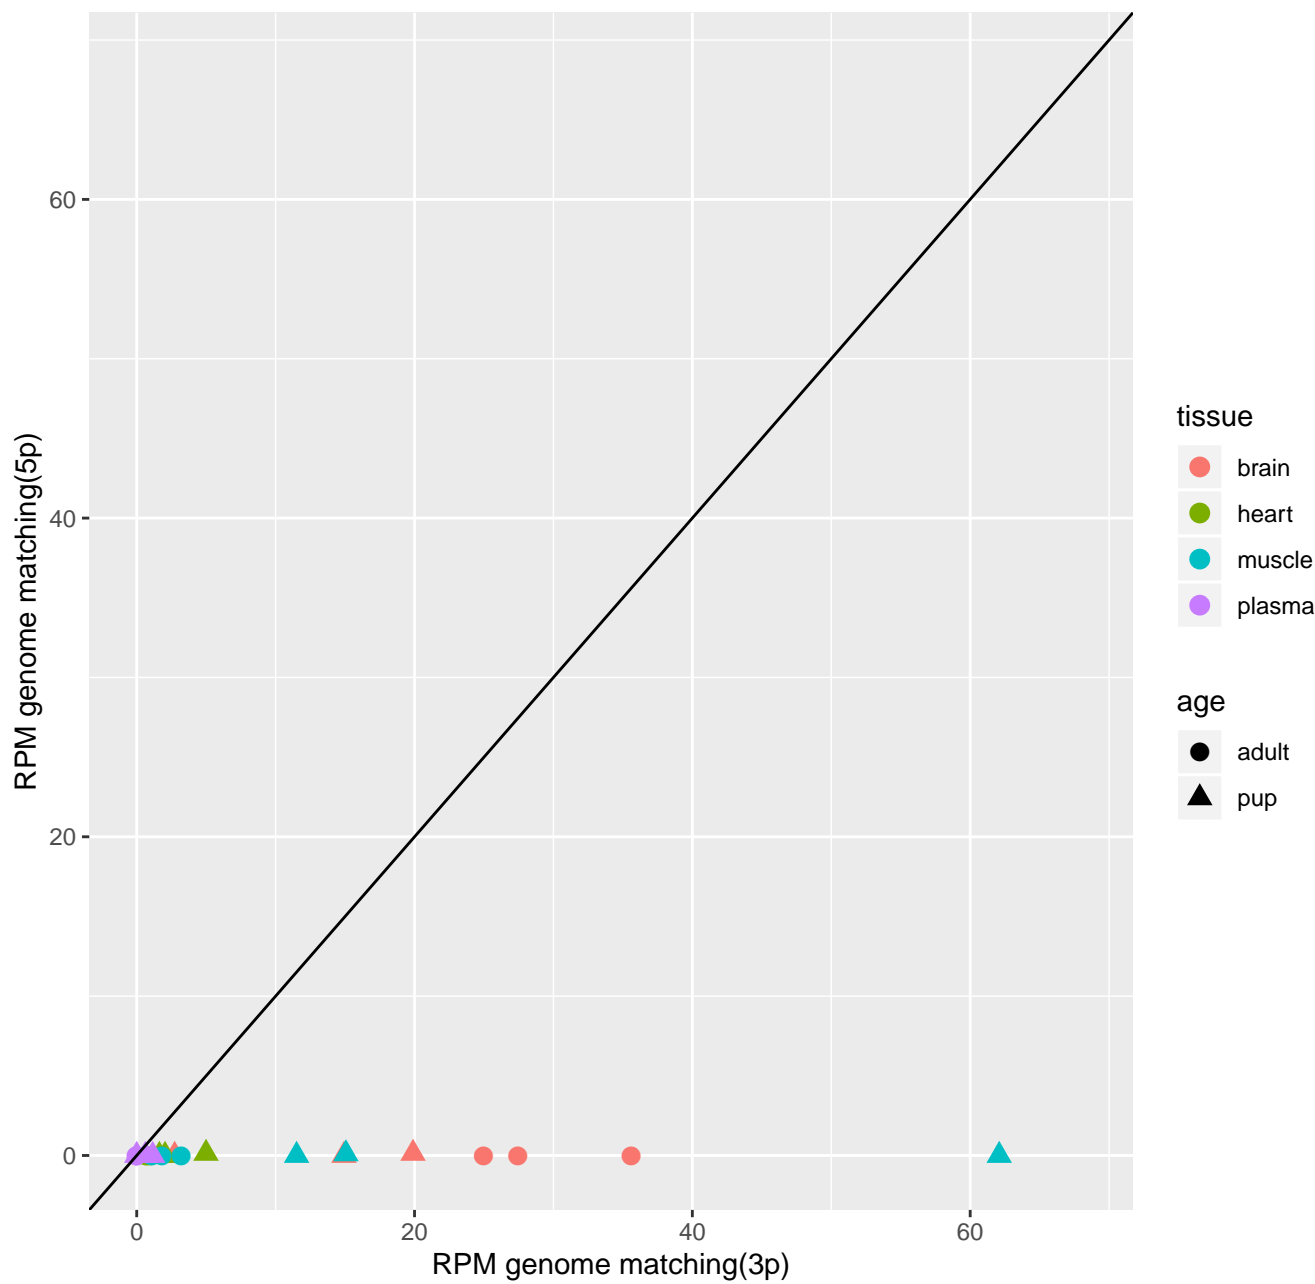

## lwe-miR-543\_miRDeep2\_loc1

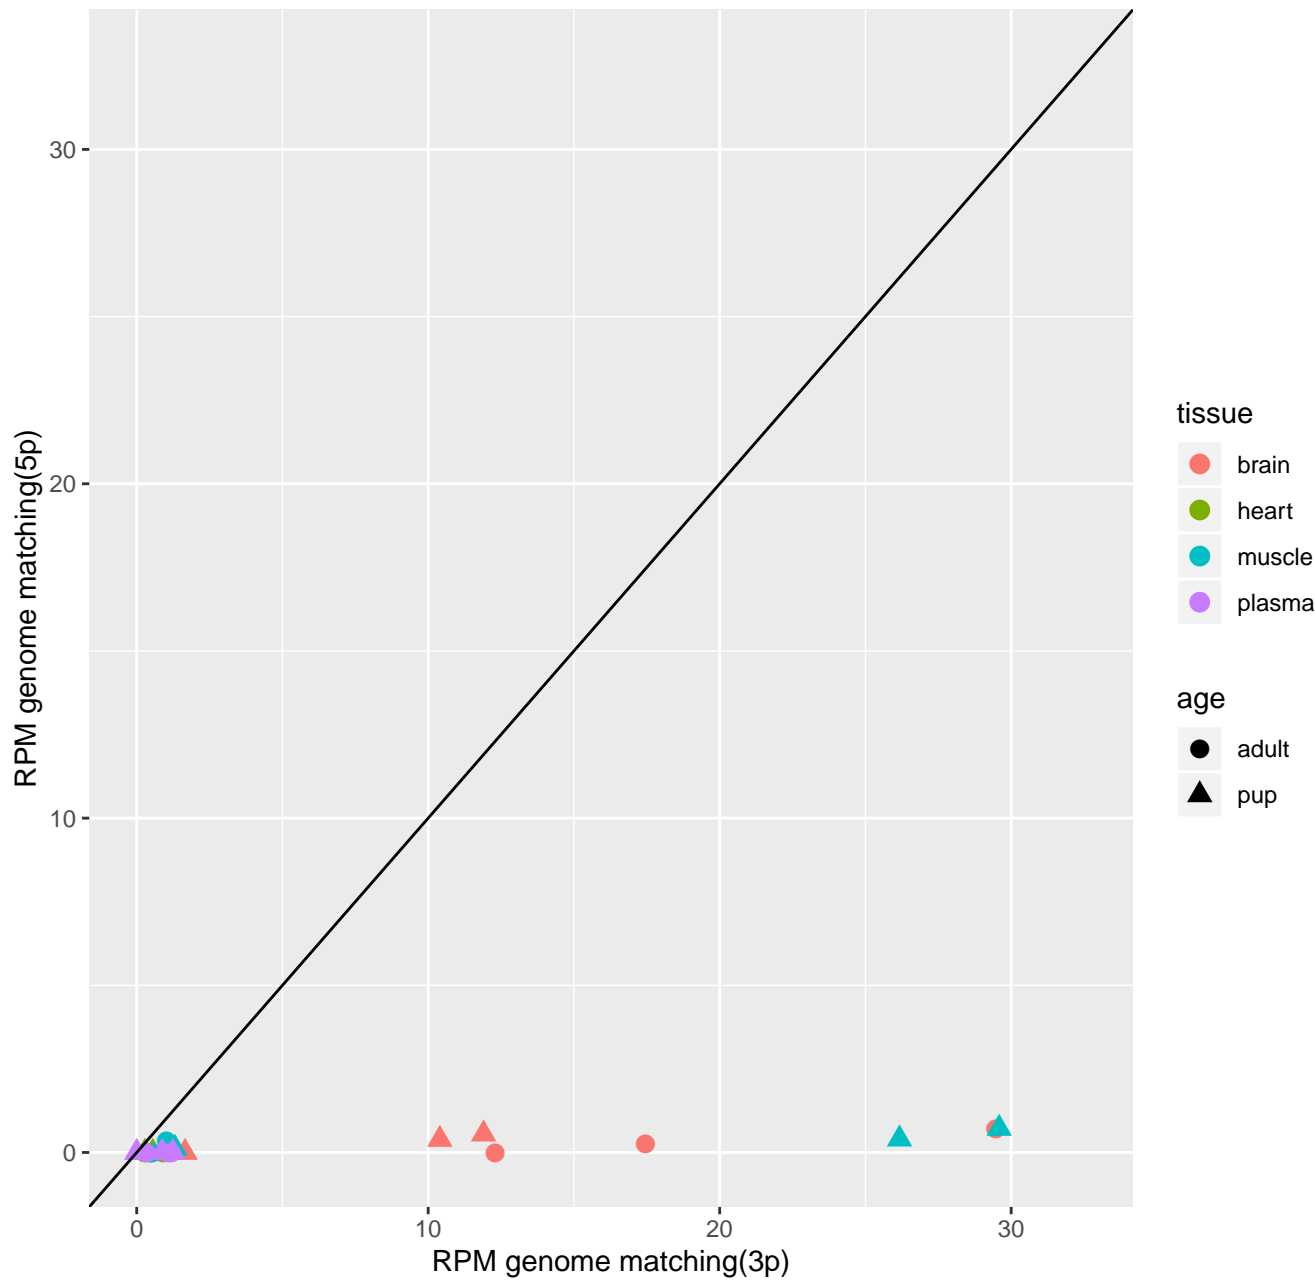

## lwe-miR-483\_miRDeep2\_loc1

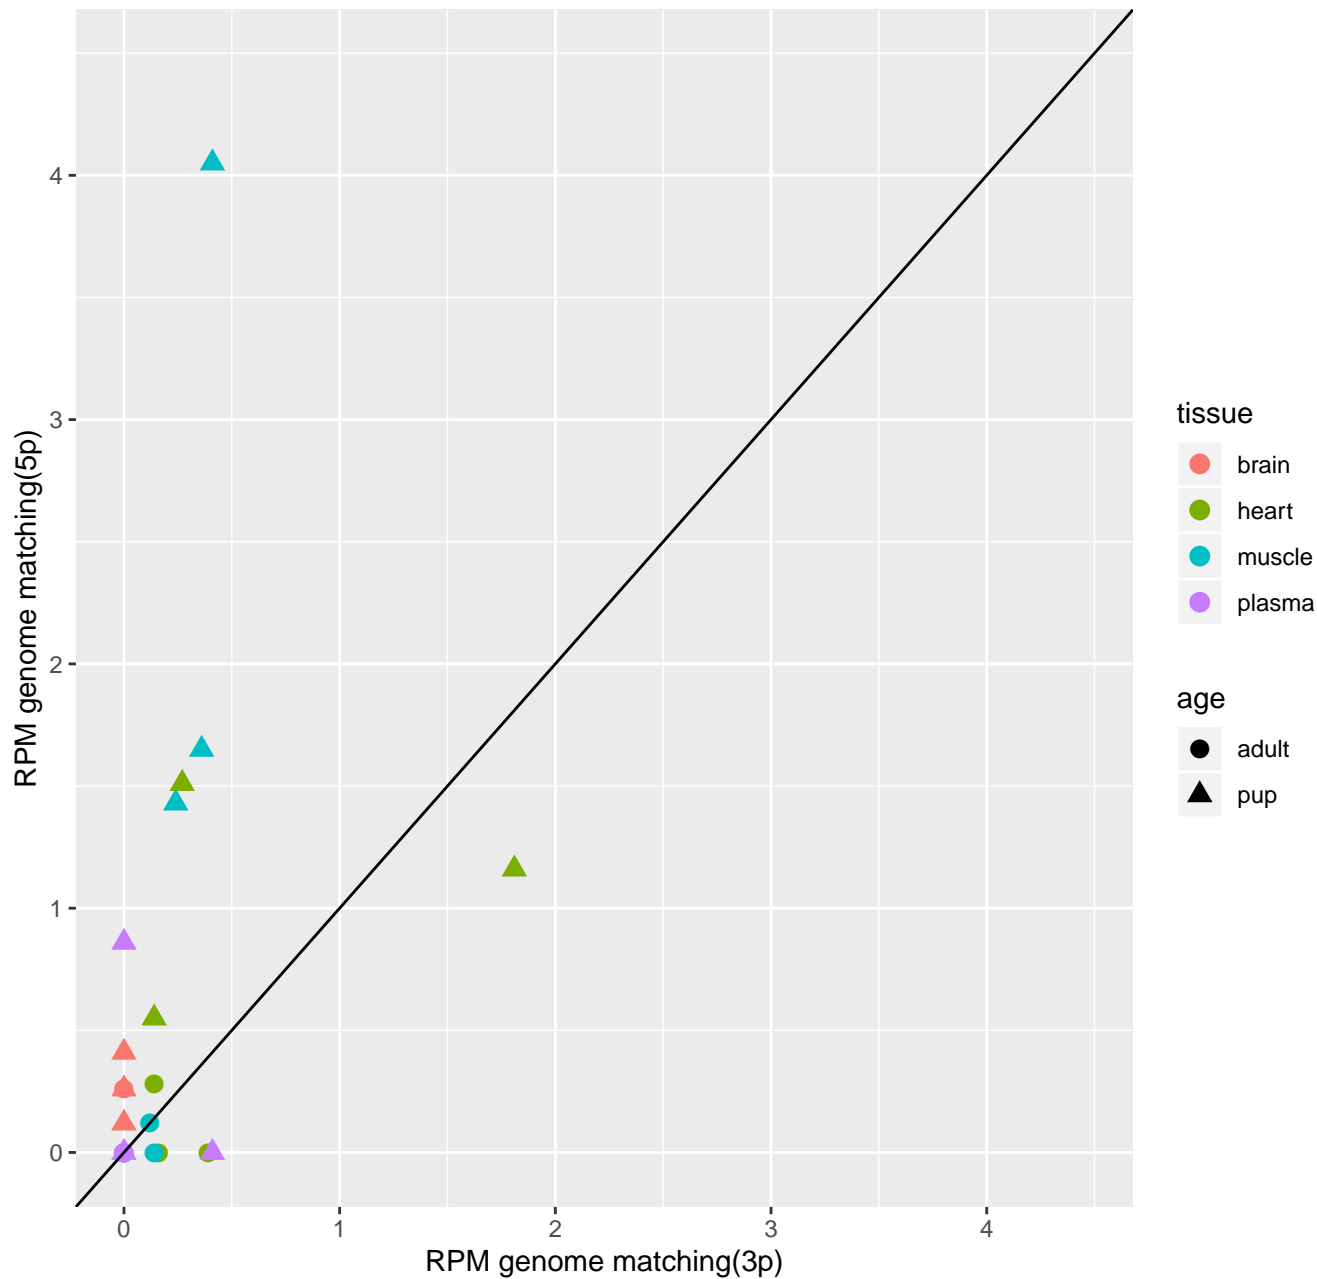

## WS\_miRDeep2\_novel\_106

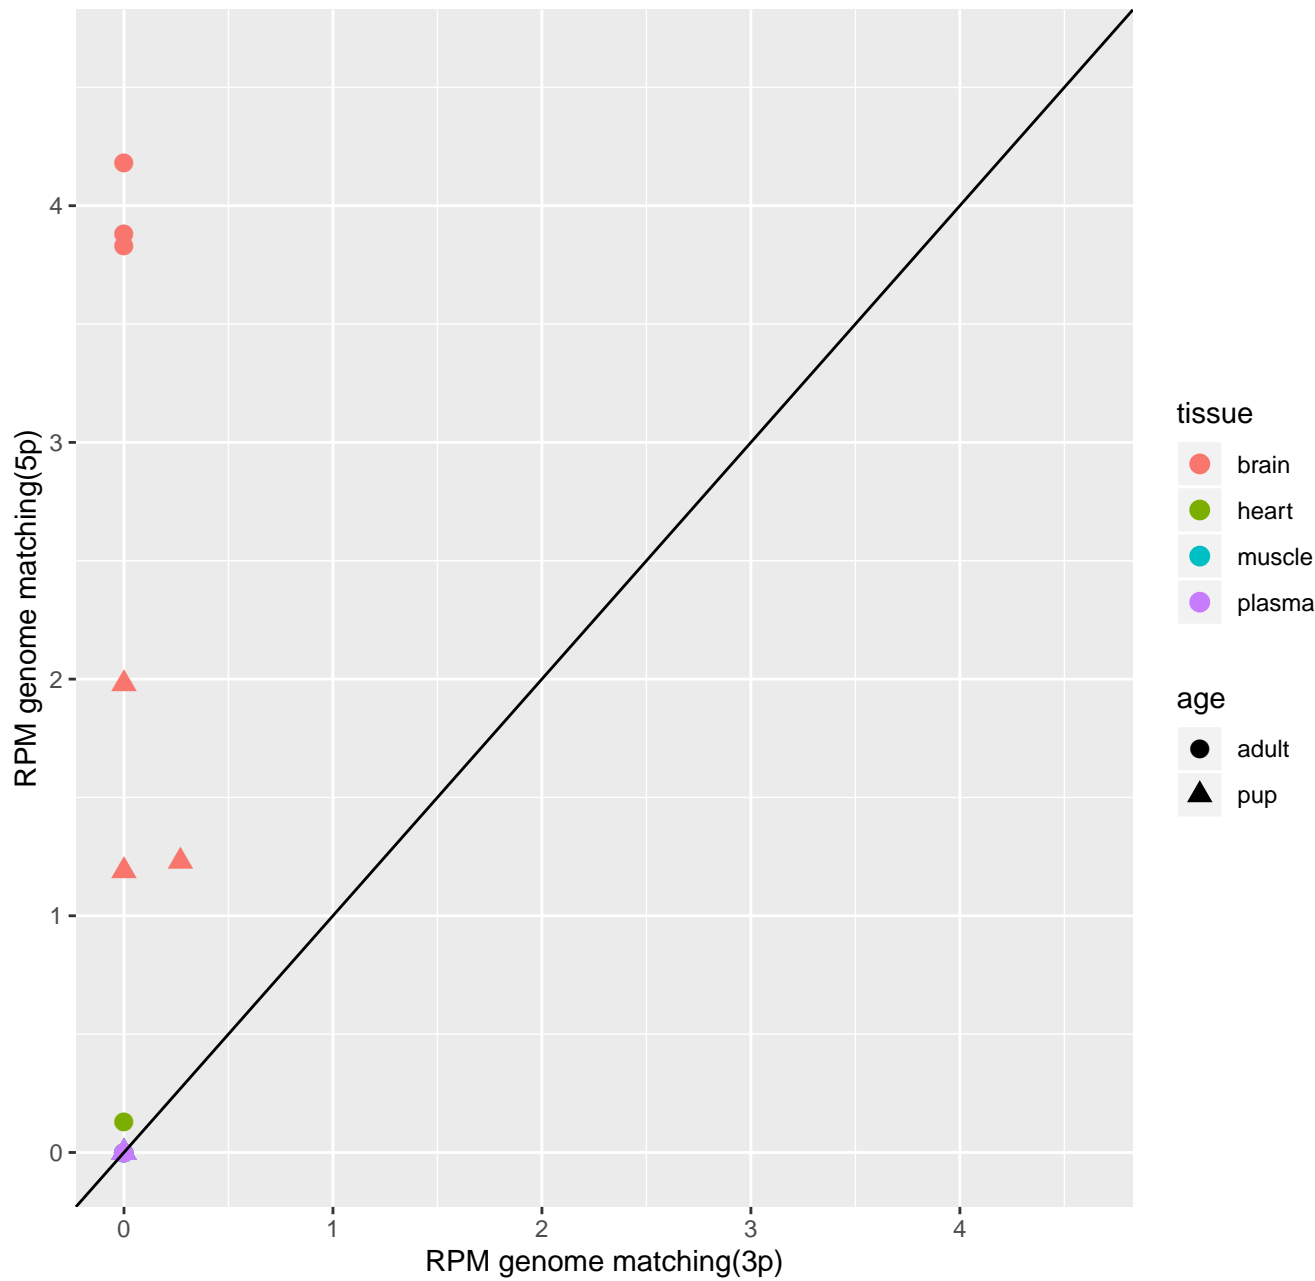

# WS\_miRDeep2\_novel\_107

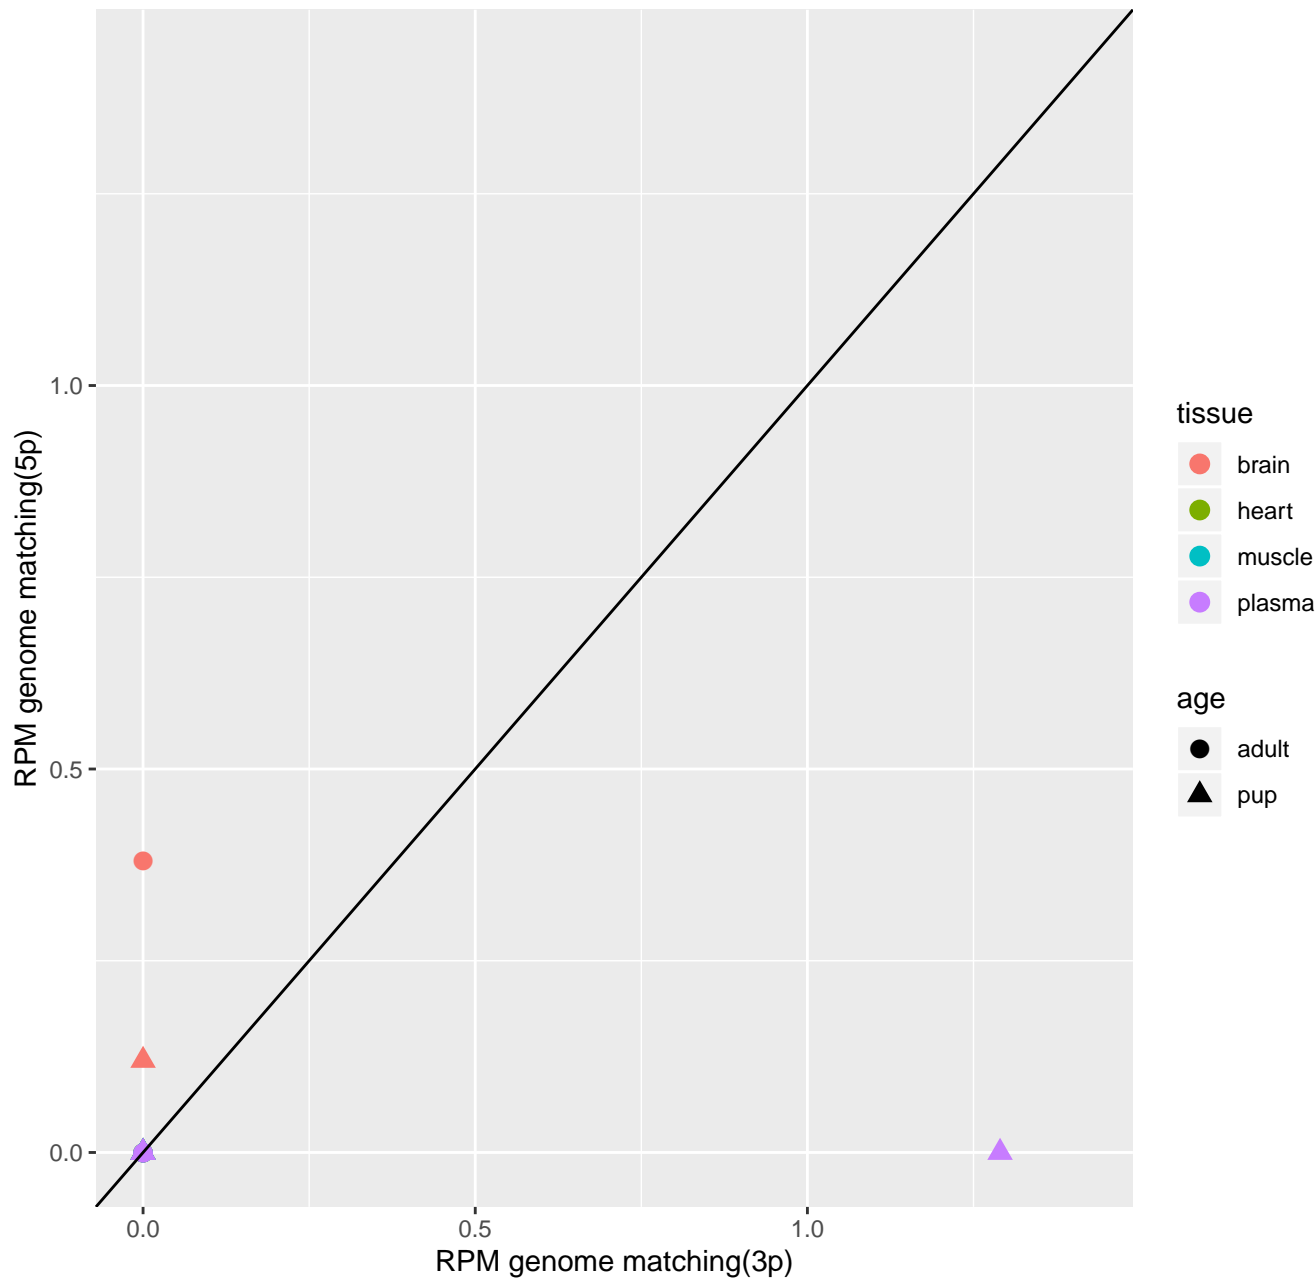

# WS\_miRDeep2\_novel\_108

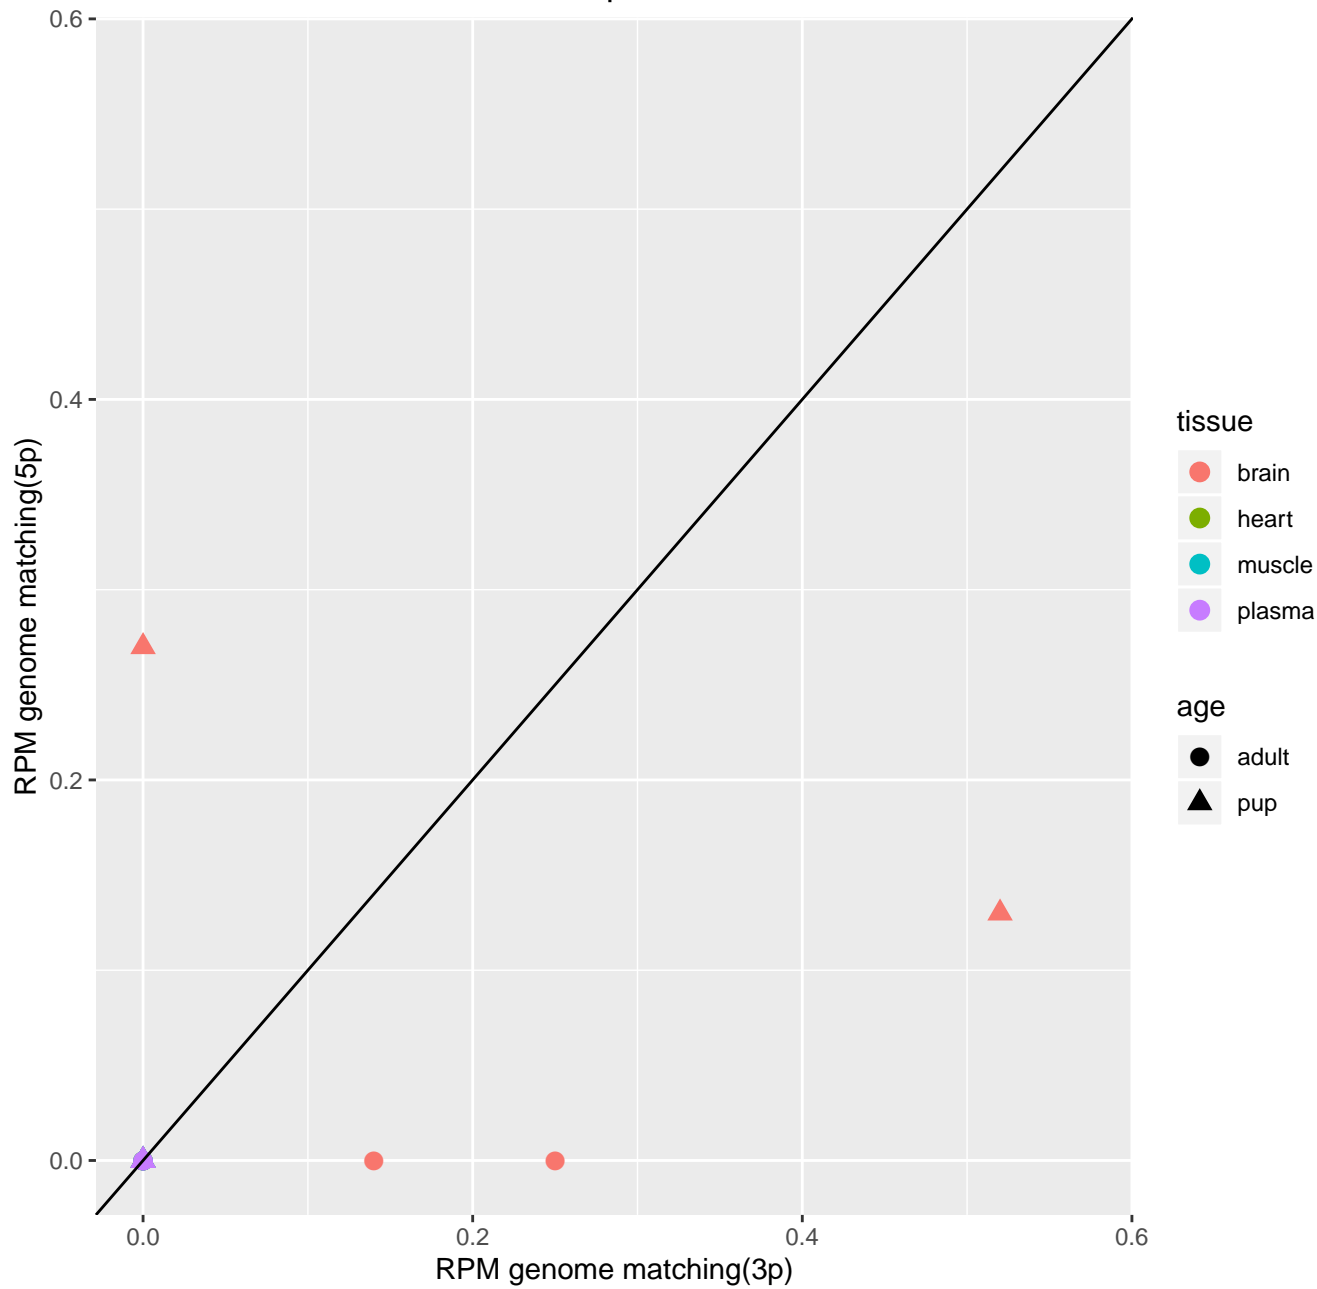

# WS\_miRDeep2\_novel\_109

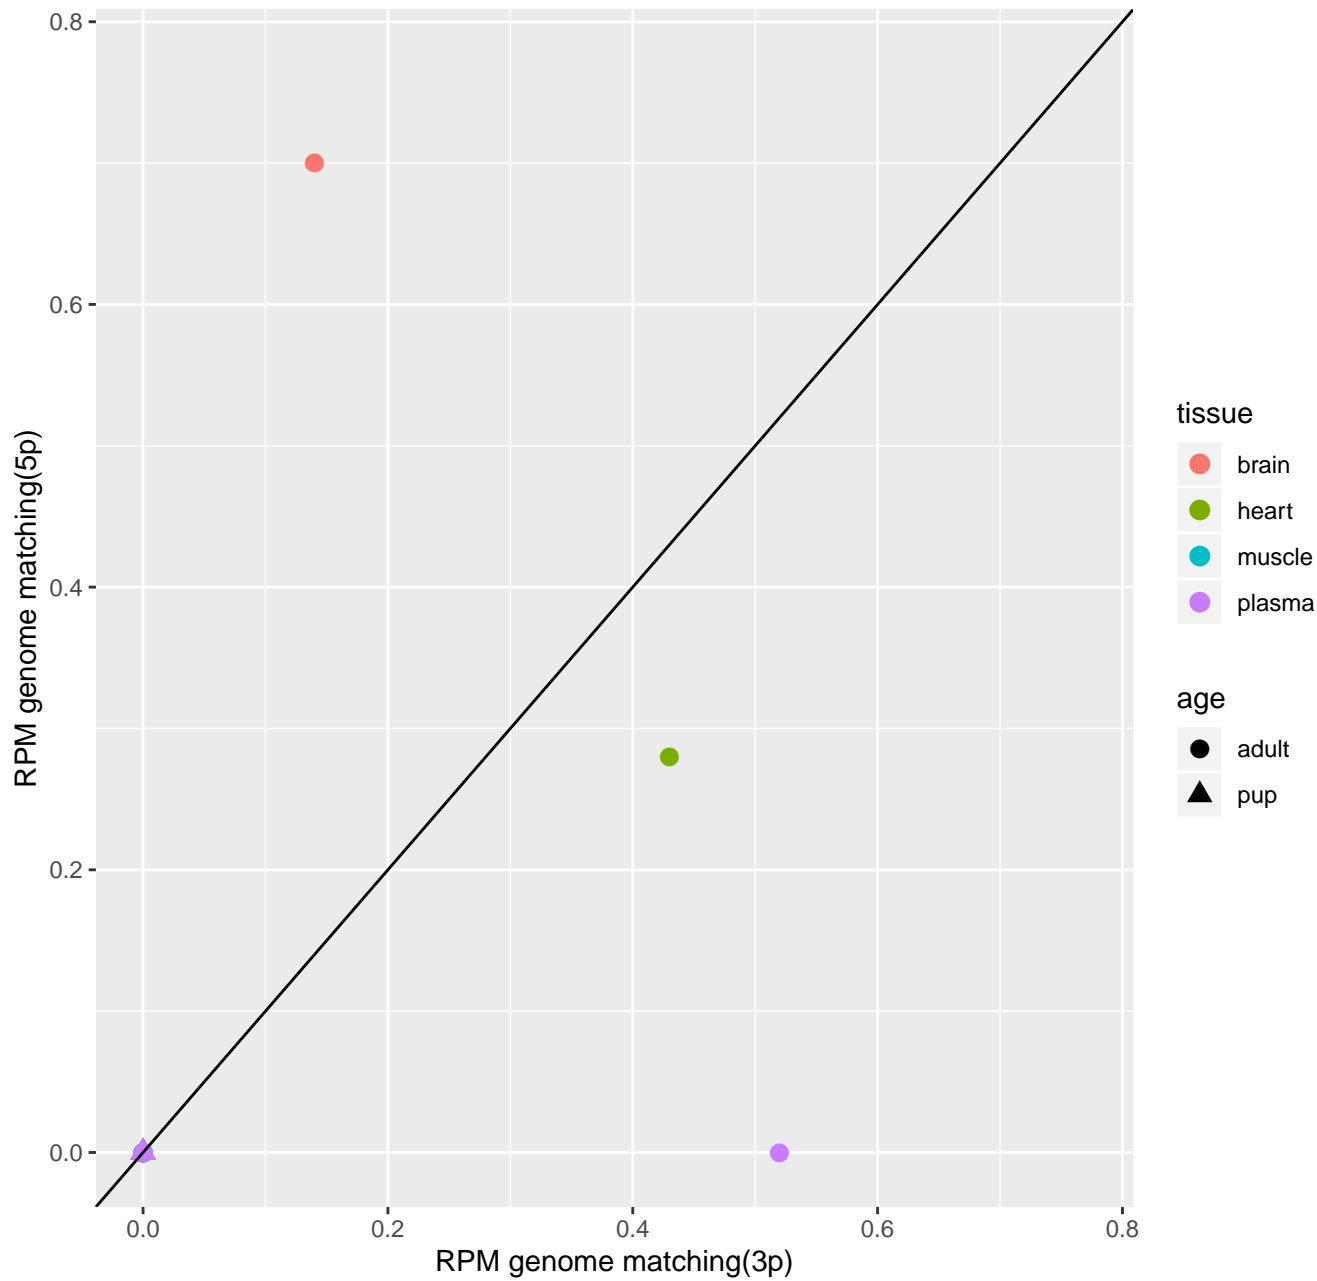



# lwe-miR-3085\_loc1

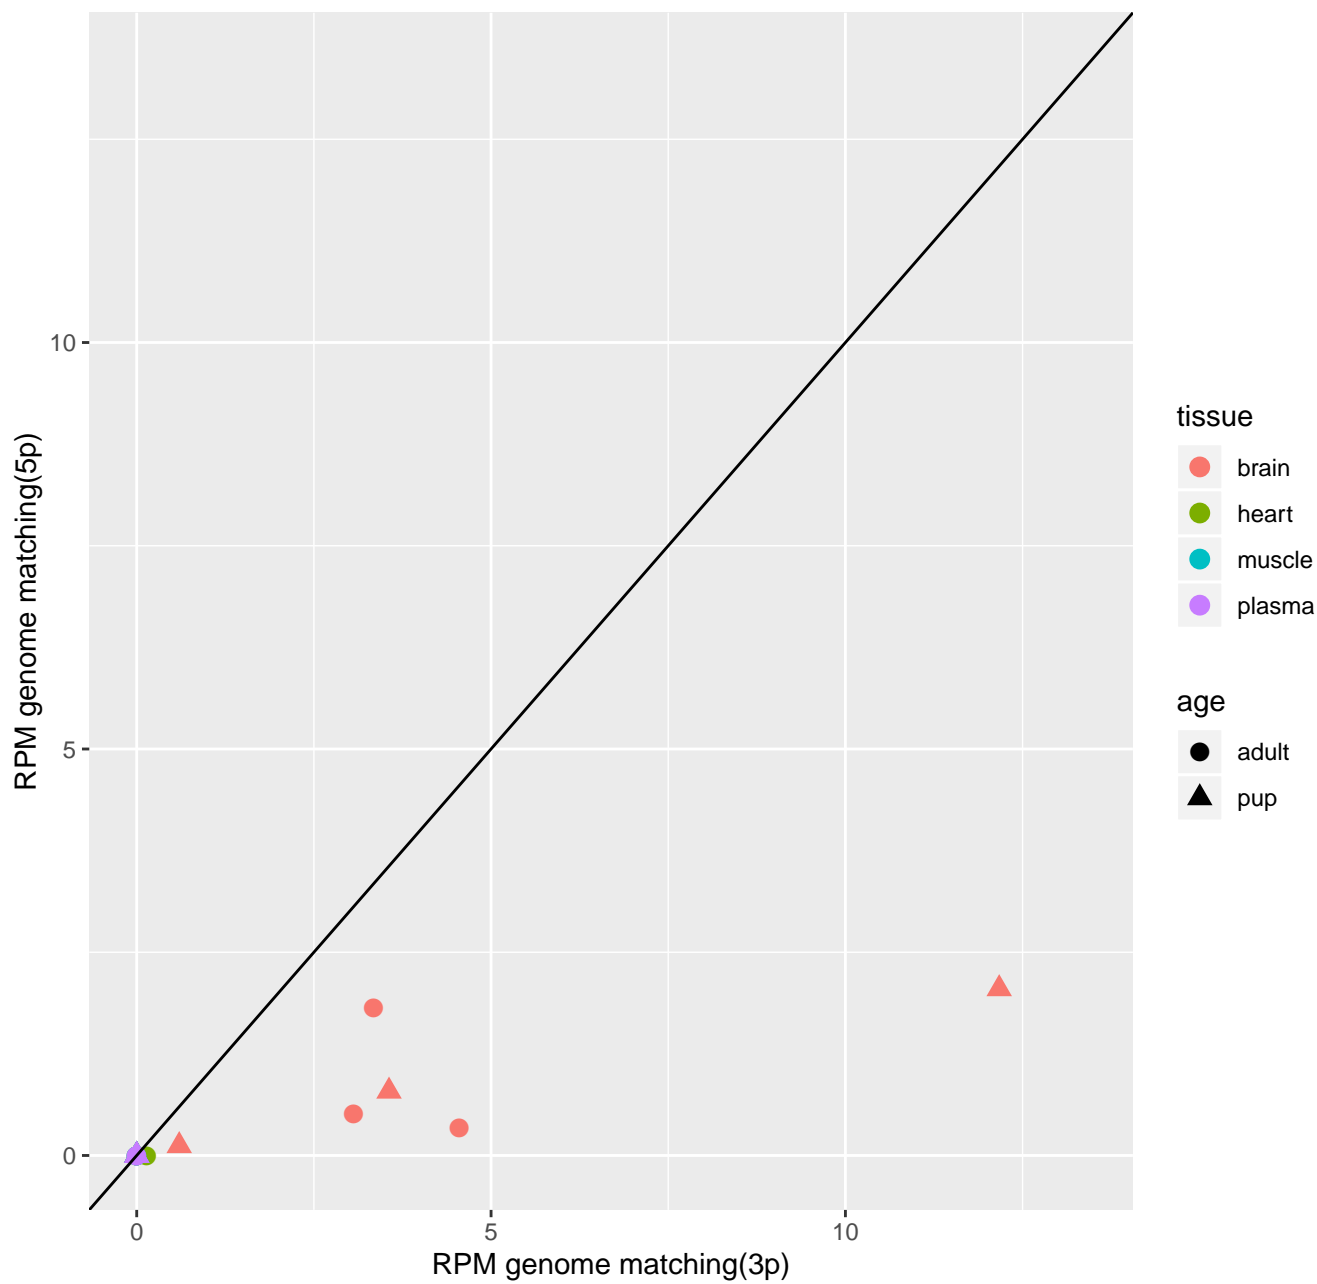

# WS\_miRDeep2\_novel\_111

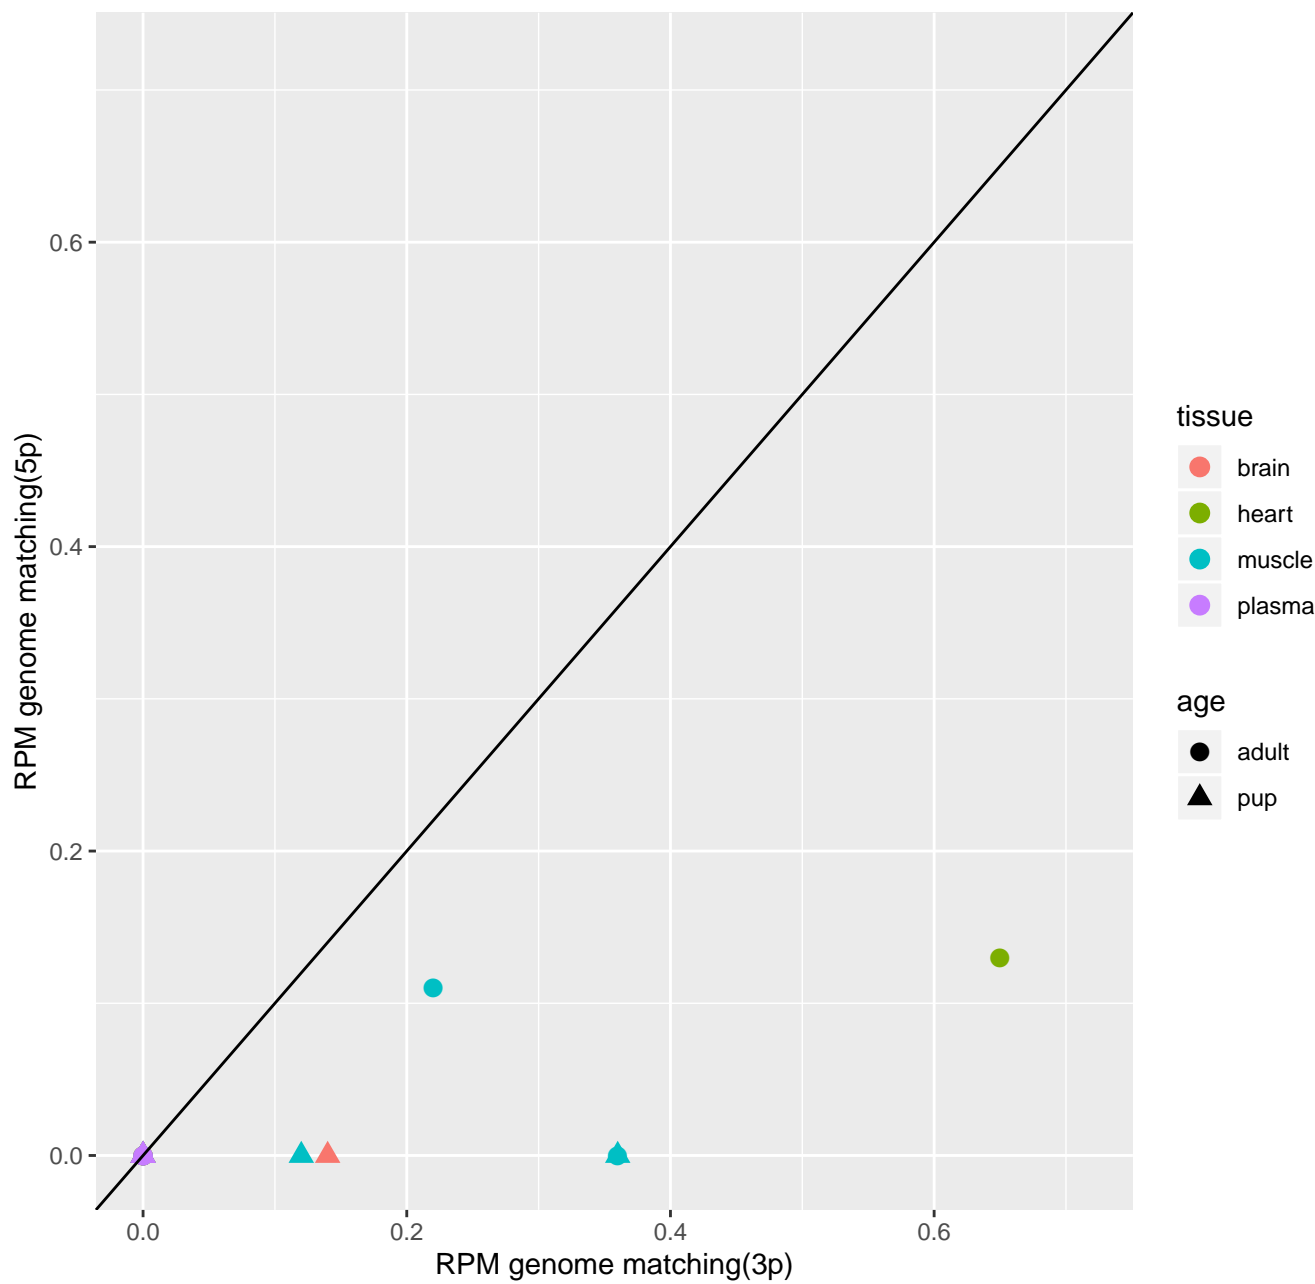

## lwe-miR-301b\_miRDeep2\_loc1

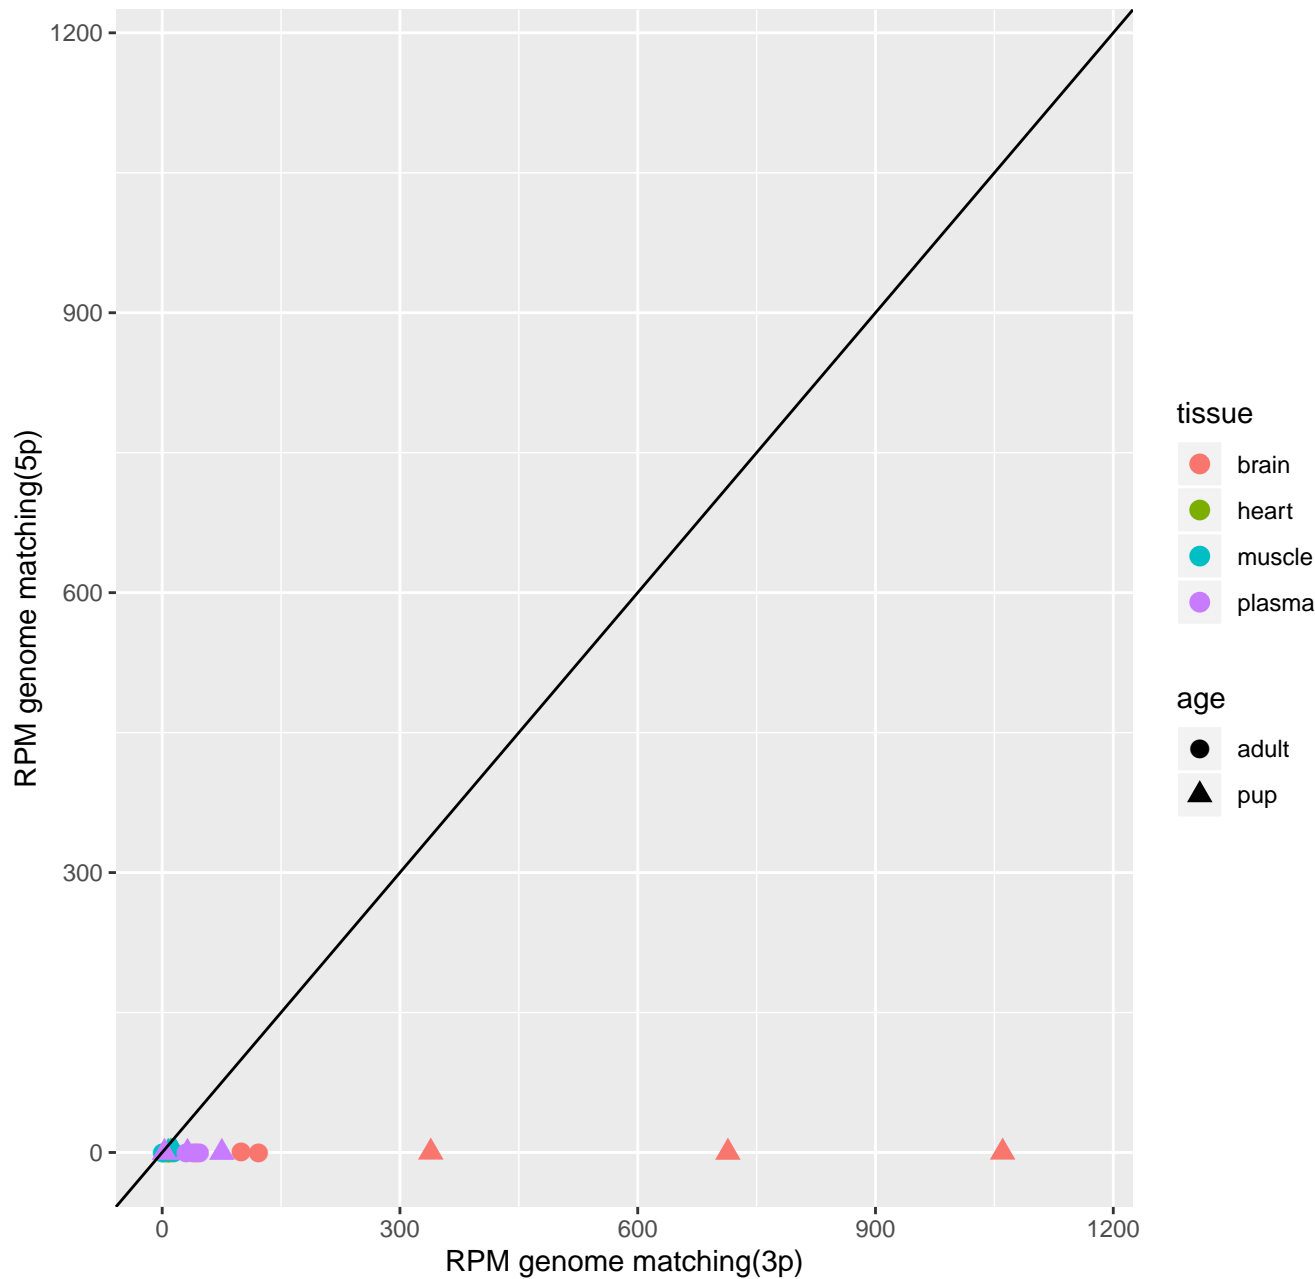

# WS\_miRDeep2\_novel\_112

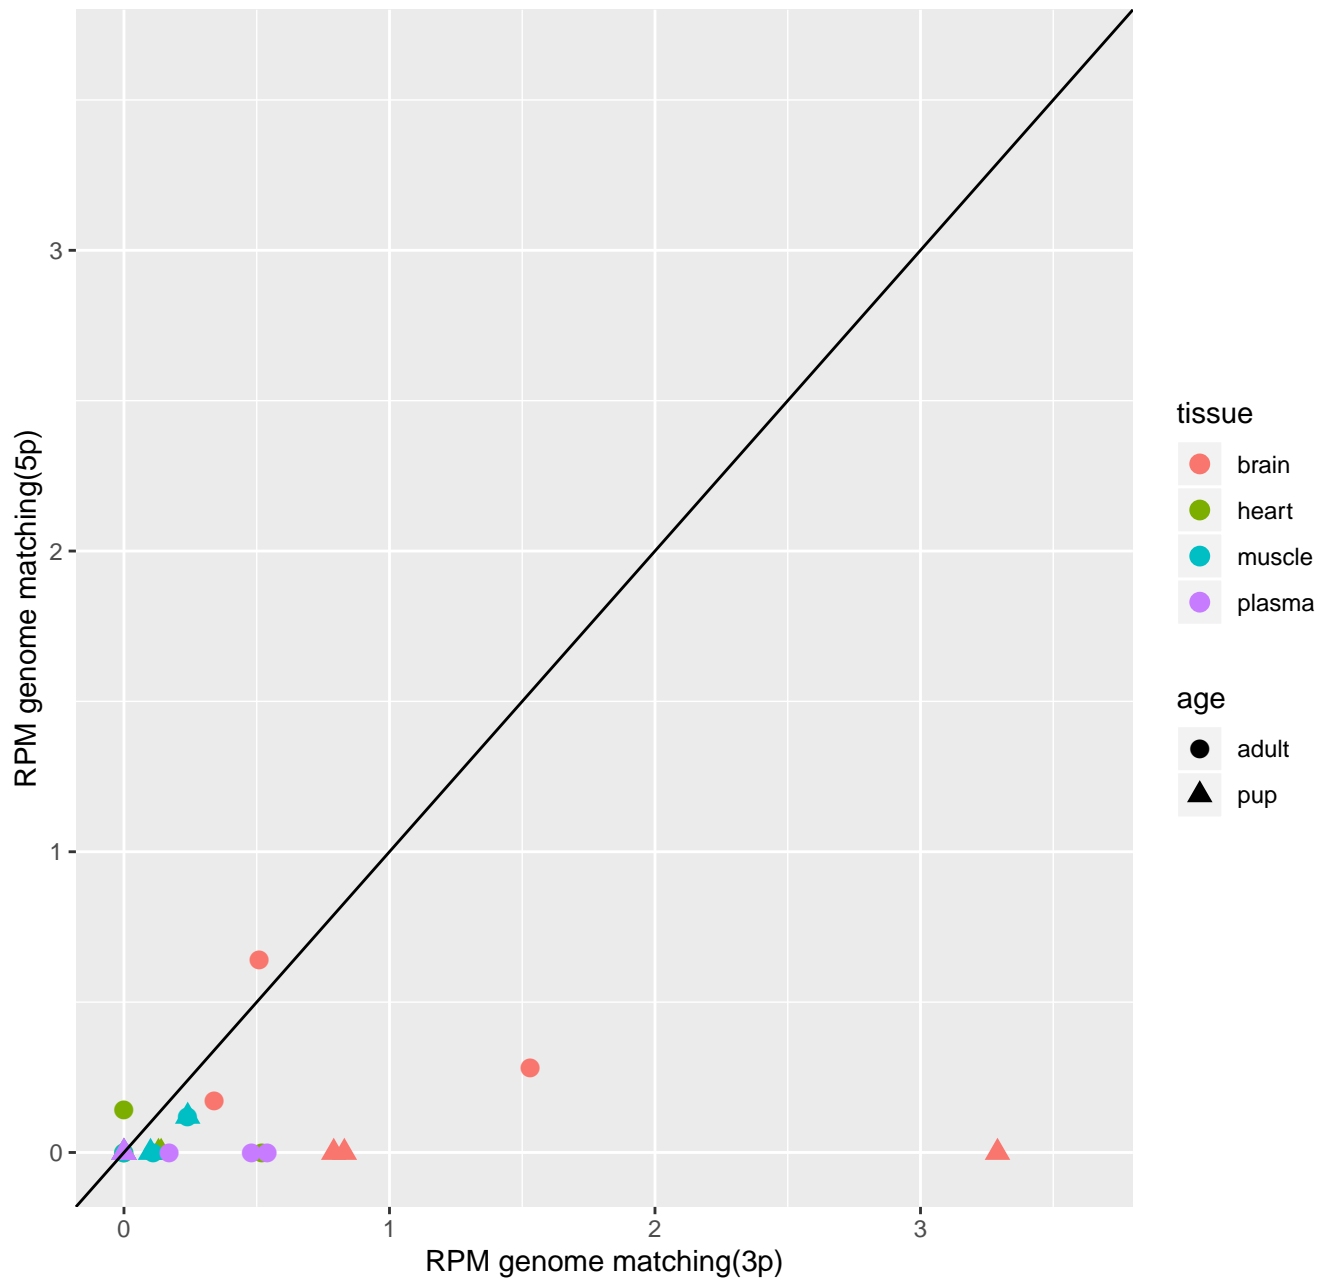

# WS\_miRDeep2\_novel\_113

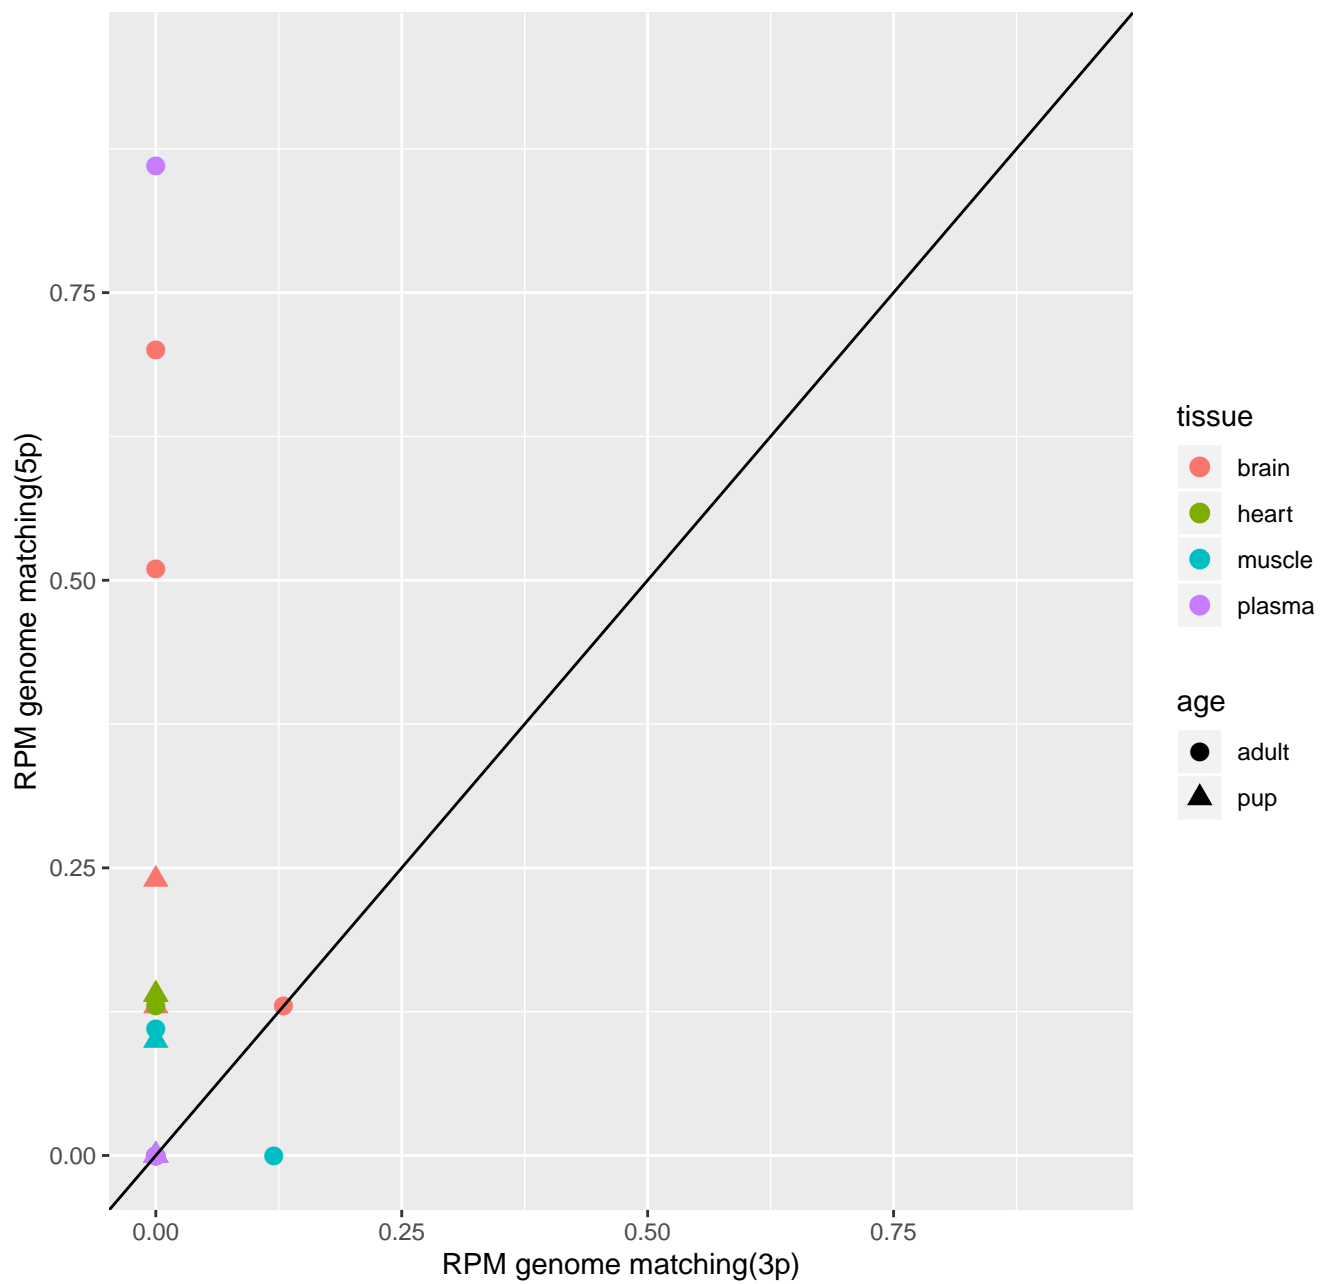

# WS\_miRDeep2\_novel\_114

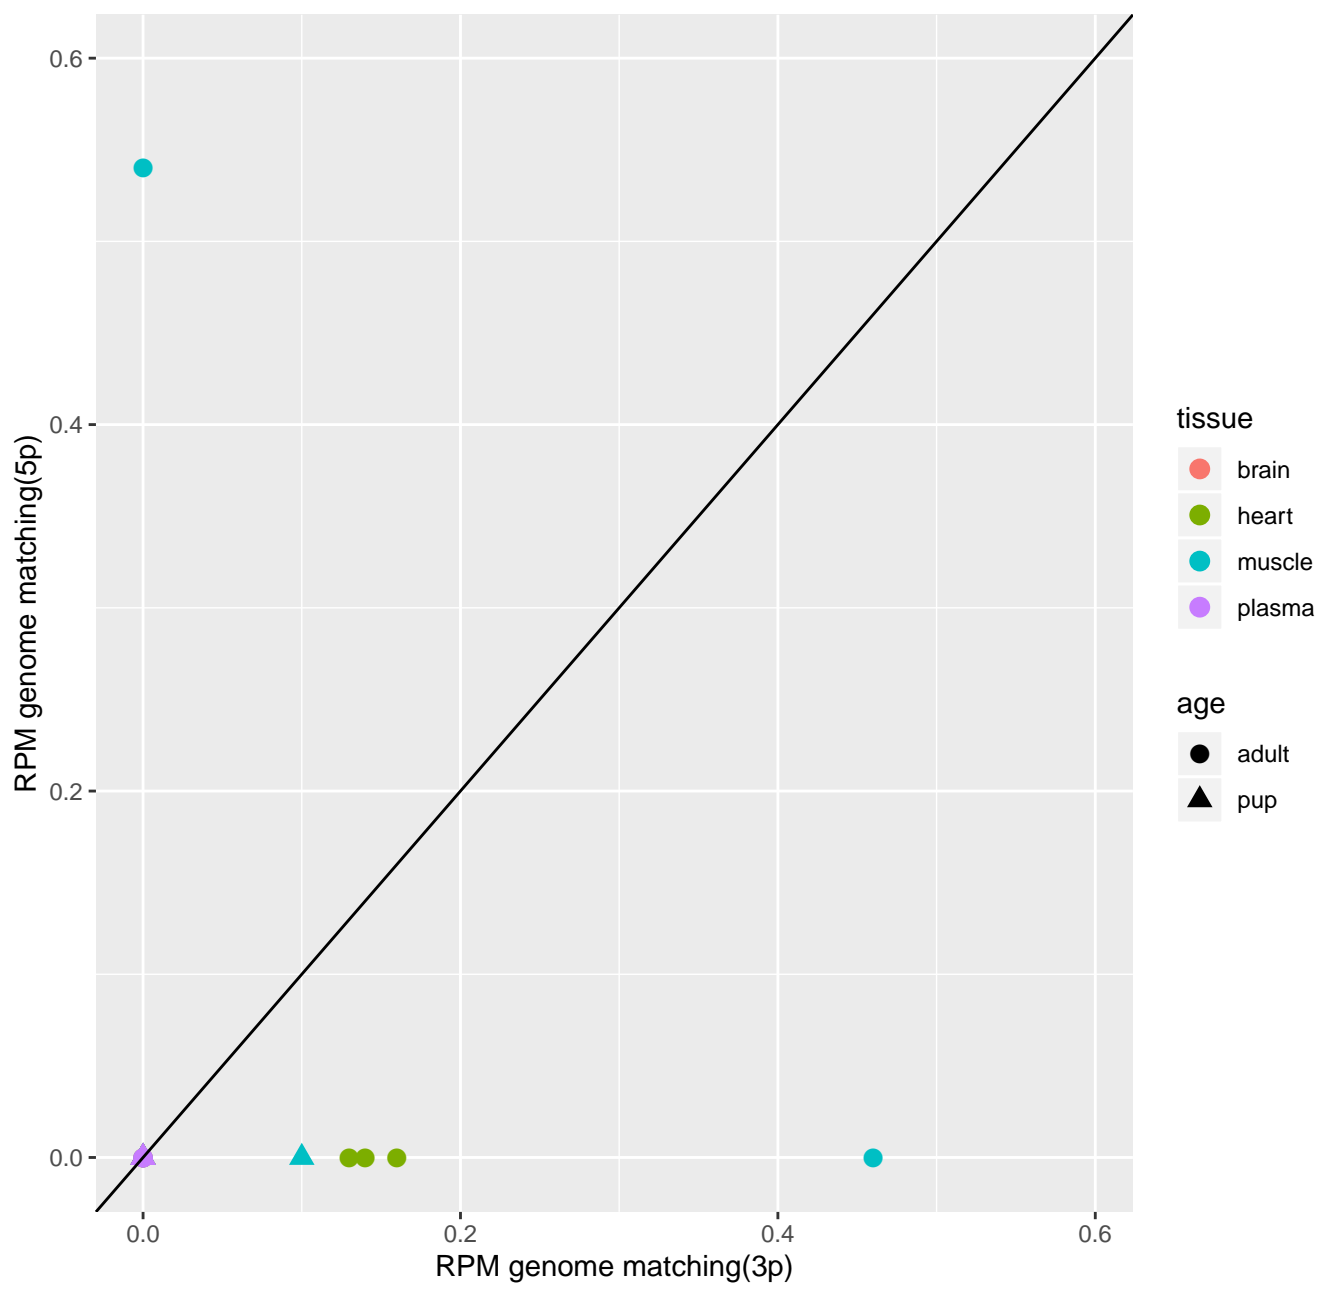

## WS\_miRDeep2\_novel\_115

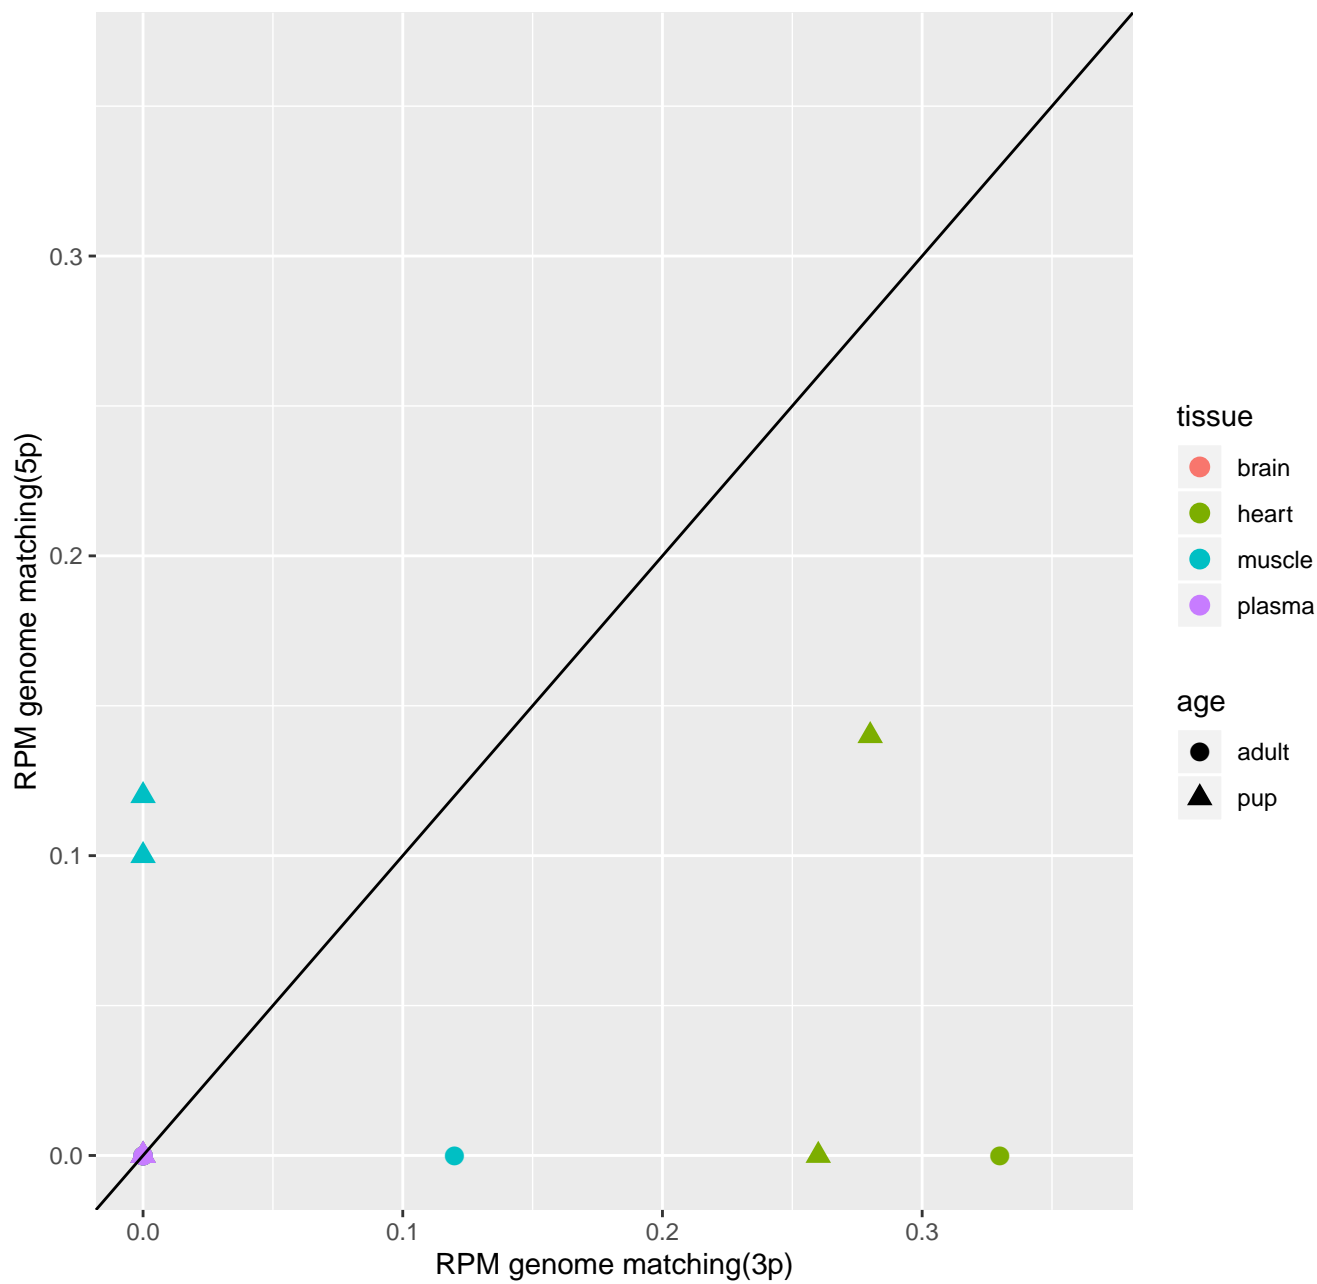

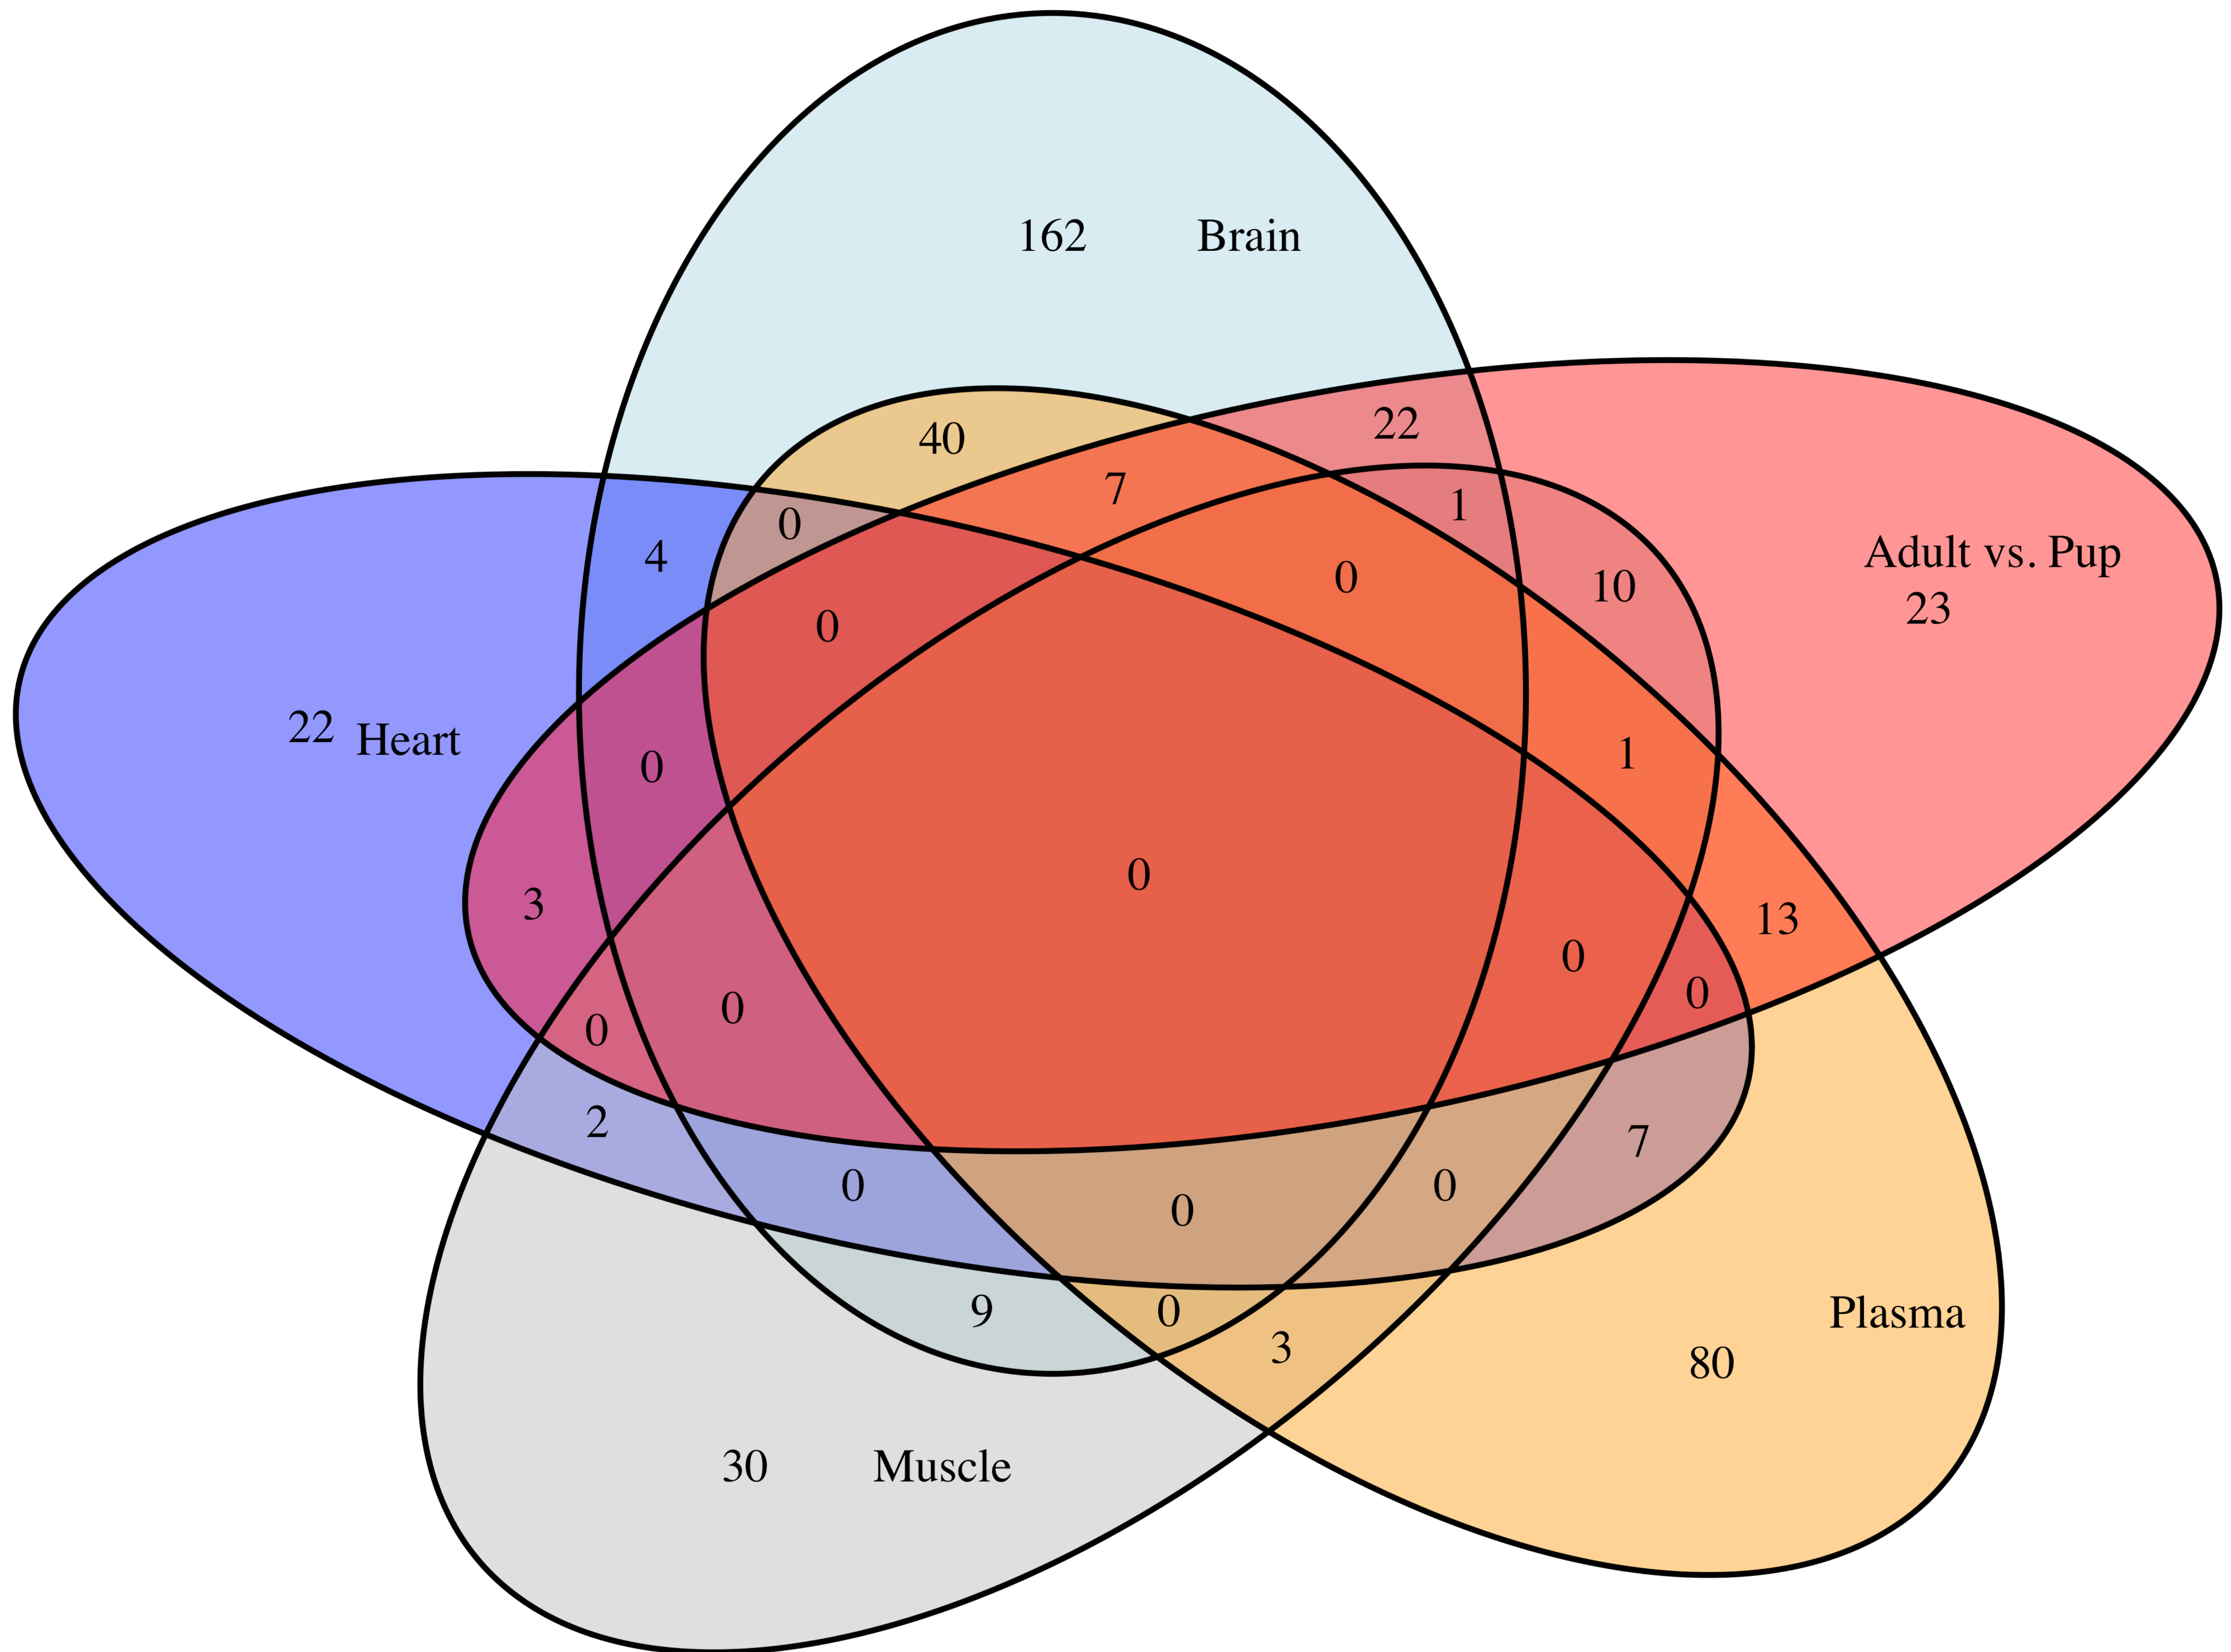

Supplementary Figure S7. Venn diagrams showing the overlap between sets of DE miRNAs for each comparison: “Brain”, “Heart”, “Muscle”, “Plasma” and “Adult vs. Pup”.



## Selected GO:terms enriched in the targets of lwe-miR-339-3p

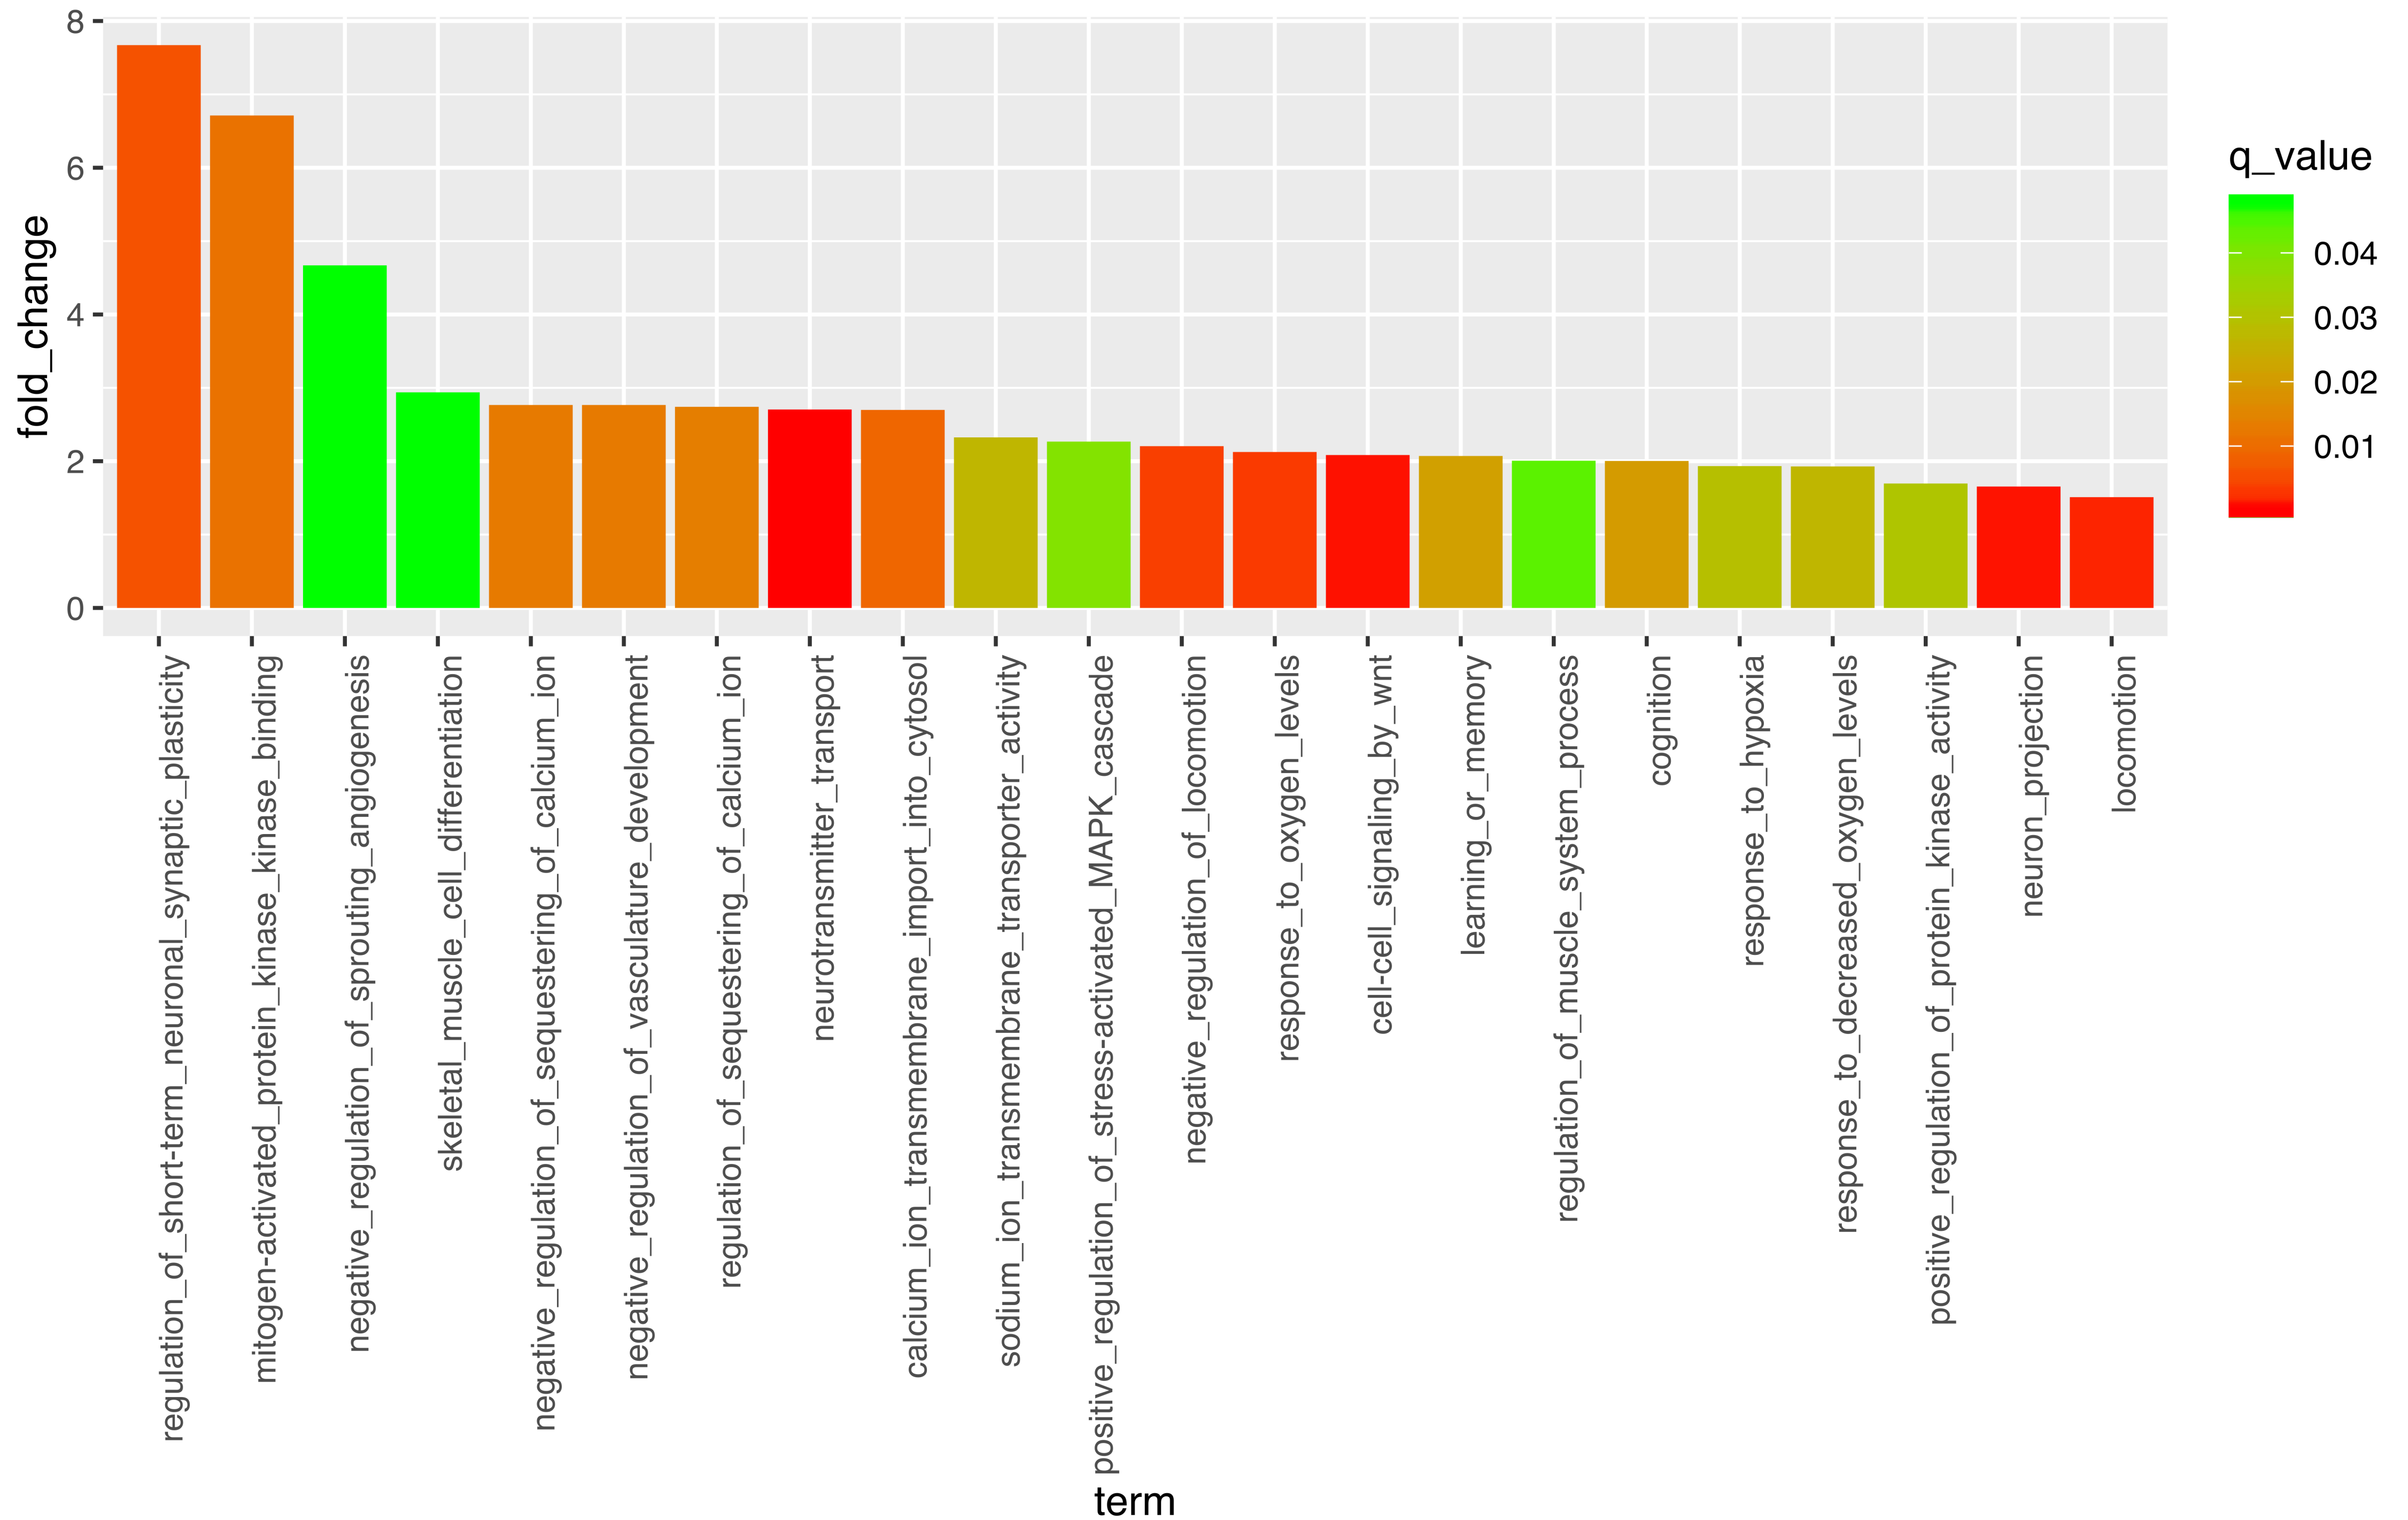

Supplementary Figure S8. Selected GO accessions enriched in the targets of miR-339-3p. The color gradient reflects the calculated q-value; different GO accessions are listed along the x-axis, while the fold change enrichment is shown on the y-axis.
